# Supplementary material for: A 5-km-thick reservoir with > 380,000 km3 of magma within the ancient Earth's crust
Source: Sci Rep. 2022 Sep 19;12:15651. doi: 10.1038/s41598-022-19915-w (PMC9485162; doi:10.1038/s41598-022-19915-w)
Supplement: Supplementary file 1 — Supplementary Information 1. [file 41598_2022_19915_MOESM1_ESM.xlsx]

## Sheet: Latypov Chistyakova Obs
EAST	NORTH	RL	Date	Geologist	Waypoint ID	Lat	Long	Datum	Zone	Lith_Code1	Geology_Description	Photo_Ref	S0_Dip	S0_Dip_Dir
204714	7.21199e+06	1930.99	2020-12-19	RL	RO-1	-25.1792	30.0703	WGS84	36S	MA	Mottled anorthosite; well-developed igneous layering
205976	7.21164e+06	2015.47	2020-12-19	RL	RO-2	-25.1826	30.0827	WGS84	36S	MA	Mottled anorthosite; well-developed igneous layering
206114	7.21174e+06	2033.04	2020-12-19	RL	RO-3	-25.1818	30.0841	WGS84	36S	MA	Mottled anorthosite; well-developed igneous layering; the same layer as in RO-2 along the strike
207497	7.21178e+06	1987.28	2020-12-19	RL	RO-4	-25.1817	30.0979	WGS84	36S	MA	Mottled anorthosite; well-developed igneous layering; 25 cm thick layer		10	270
207698	7.21177e+06	1977.87	2020-12-19	RL	RO-5	-25.1818	30.0998	WGS84	36S	MA	Mottled anorthosite, a top of the layer at the cliff, the total thickness is supposed to 50-70 m (based on available publications). This is the Main Anorthosite Marker		10	320
206794	7.2051e+06	1915.27	2020-12-19	RL	FLOOR CONTACT	-25.2418	30.0895	WGS84	36S	FC	Floor contact of the Bushveld marginal gabbronorite with Transvaal quartzite		30
195969	7.19387e+06	1792.96	2020-12-20	RL	TO-0	-25.3409	29.9796	WGS84	36S	MA	Mottled anorthosite, >2 m thick layer, above a zone with a few layers of Tennis Balls
194937	7.19353e+06	1686.23	2020-12-20	RL	TO-1	-25.3438	29.9693	WGS84	36S	GNO	Mottled anorthosite, large boulders
194434	7.19336e+06	1664.93	2020-12-20	RL	LUNCH	-25.3452	29.9642	WGS84	36S	GNO	Gabbronorites
194548	7.19346e+06	1668.35	2020-12-20	RL	TBL-X	-25.3443	29.9654	WGS84	36S	MA	Gabbronorites with Tennis Balls (clearly, out of normal place!)
194909	7.19371e+06	1687.54	2020-12-20	RL	TO-2	-25.3421	29.969	WGS84	36S	MA	Mottled anorthosite, two thin layers in gabbronorites at the base of the a larger layer of anorthosites that is poorly exposed here		10	300
194865	7.19367e+06	1683.78	2020-12-20	RL	TO-3	-25.3425	29.9686	WGS84	36S	MA	Mottled anorthosite, boulder close to top of the a larger layer of anorthosites that is poorly exposed here
194823	7.1938e+06	1700.51	2020-12-20	RL	TO-3_leader	-25.3414	29.9682	WGS84	36S	MA	Mottled anorthosite, at least, three thin layers in gabbronorites		25	305
195041	7.19393e+06	1717.51	2020-12-20	RL	TO-4	-25.3402	29.9704	WGS84	36S	MA	Mottled anorthosite, top of a > 3-4 m thick layer, above are gabbronorites
195112	7.19392e+06	1712.1	2020-12-20	RL	TO-5	-25.3403	29.9711	WGS84	36S	MA	Mottled anorthosite, base of a > 3-4 m thick layer, below are gabbronorites
195289	7.19428e+06	1743.37	2020-12-20	RL	TO-6	-25.3371	29.9729	WGS84	36S	MA	Mottled anorthosite, a 20-50 cm thick discontinous layer hosted by gabbronorites
195253	7.19418e+06	1731.67	2020-12-20	RL	TO-7	-25.3379	29.9726	WGS84	36S	MA	Mottled anorthosite, 1-2 m thick layer, the same layer as TO-0 along the strike
195932	7.19414e+06	1773.73	2020-12-20	RL	TO-8	-25.3385	29.9793	WGS84	36S	MA	Mottled anorthosite, 1-2 m thick layer, the same layer as TO-0 along the strike
195944	7.19409e+06	1784.3	2020-12-20	RL	TO-9	-25.3389	29.9794	WGS84	36S	MA	Mottled anorthosite, 1-2 m thick layer, the same layer as TO-0 along the strike		10	270
195936	7.19404e+06	1785.62	2020-12-20	RL	TO-10	-25.3393	29.9793	WGS84	36S	MA	Mottled anorthosite, 1-2 m thick layer, the same layer as TO-0 along the strike
195933	7.19401e+06	1784.98	2020-12-20	RL	TO-11	-25.3397	29.9793	WGS84	36S	MA	Mottled anorthosite, 1-2 m thick layer, the same layer as TO-0 along the strike
190107	7.18053e+06	1646.05	2020-12-21	RL	ST-1	-25.46	29.9184	WGS84	36S	MA	Mottled anorthosite, boulder with a thin layer
190155	7.18052e+06	1657.82	2020-12-21	RL	ST-2	-25.4601	29.9188	WGS84	36S	MA	Mottled anorthosite, boulder with a thin layer
190164	7.1805e+06	1662.67	2020-12-21	RL	ST-3	-25.4603	29.9189	WGS84	36S	MA	Mottled anorthosite, deformed layer in a large boulder of gabbronorites
190206	7.1804e+06	1686.83	2020-12-21	RL	ST-4	-25.4612	29.9193	WGS84	36S	GNO	Gabbronorite, boulder with pegmatitic patches
190211	7.18039e+06	1688.14	2020-12-21	RL	ST-5	-25.4613	29.9194	WGS84	36S	GNO	Gabbronorite, boulder with pegmatitic patches
190237	7.18034e+06	1690.85	2020-12-21	RL	ST-6	-25.4617	29.9196	WGS84	36S	MA	Mottled anorthosite, a 10-15 cm thick layer in gabbronorites, with pegmatitic patches around
190281	7.18031e+06	1700.81	2020-12-21	RL	ST-7	-25.462	29.9201	WGS84	36S	MA	Mottled anorthosite, a 10-15 cm thick layer in gabbronorites, perhaps, the same layer along the strike
190348	7.18027e+06	1715.17	2020-12-21	RL	ST-8	-25.4624	29.9207	WGS84	36S	MA	Mottled anorthosite, remnants of a layer in gabbronorites, on the very top of a hill
190487	7.18017e+06	1691.92	2020-12-21	RL	ST-9	-25.4633	29.9221	WGS84	36S	GNO	Gabbronorite with pigeonite, cliff
190546	7.18014e+06	1673.61	2020-12-21	RL	ST-10	-25.4636	29.9226	WGS84	36S	GNO+MA	Boulder of gabbronorite with thin anorthosite layers
190665	7.18004e+06	1653.52	2020-12-21	RL	ST-11	-25.4645	29.9238	WGS84	36S	GNO	Gabbronorite with pigeonite, with anorthosite patches
190688	7.18004e+06	1652.96	2020-12-21	RL	ST-12	-25.4646	29.924	WGS84	36S	MA	Mottled anorthosite, > 3-4 m thick layer, boulders but in situ ones, clearly non-transported
190644	7.18012e+06	1658.84	2020-12-21	RL	ST-13	-25.4638	29.9236	WGS84	36S	MA	Mottled anorthosite, > 3-4 m thick layer, outcrops along the strike of the the same anorthosite layer
190963	7.18e+06	1694.32	2020-12-21	RL	ST-14	-25.465	29.9268	WGS84	36S	BA	Dullstroom basalts
191009	7.18e+06	1710.77	2020-12-21	RL	ST-15	-25.465	29.9272	WGS84	36S	BA	Dullstroom basalts
191135	7.18059e+06	1715.16	2020-12-21	RL	ST-16	-25.4597	29.9286	WGS84	36S	BA	Dullstroom basalts
191027	7.1806e+06	1709.31	2020-12-21	RL	ST-17	-25.4596	29.9275	WGS84	36S	BA	Dullstroom basalts
190939	7.18061e+06	1716.68	2020-12-21	RL	ST-18	-25.4595	29.9267	WGS84	36S	BA	Dullstroom basalts
190833	7.18057e+06	1711.04	2020-12-21	RL	ST-19	-25.4598	29.9256	WGS84	36S	BA	Dullstroom basalts
190695	7.1806e+06	1714.82	2020-12-21	RL	ST-20	-25.4595	29.9242	WGS84	36S	GNO	Gabbronorites with pegmatitic patches
190643	7.18058e+06	1707.81	2020-12-21	RL	ST-21	-25.4596	29.9237	WGS84	36S	GNO	Gabbronorites with pegmatitic patches
190611	7.18058e+06	1707.95	2020-12-21	RL	ST-22	-25.4596	29.9234	WGS84	36S	MA	Mottled anorthosite, > 1-2 m thick layer, nice outcrops
190506	7.18053e+06	1699.6	2020-12-21	RL	ST-23	-25.4601	29.9223	WGS84	36S	MA	Mottled anorthosite, > 1-2 m thick layer, in boulders
190494	7.18048e+06	1696.93	2020-12-21	RL	ST-24	-25.4605	29.9222	WGS84	36S	MA	Mottled anorthosite, large boulders, most likely the same layer as at ST-12 and ST-13
190450	7.18045e+06	1696.58	2020-12-21	RL	ST-25	-25.4608	29.9218	WGS84	36S	NO	Norite with large crystals of opx in finer matrix
190260	7.18043e+06	1688.03	2020-12-21	RL	ST-26	-25.4609	29.9199	WGS84	36S	MA	Mottled anorthosite, a thin layer in gabbronorites
190138	7.18046e+06	1669.28	2020-12-21	RL	ST-27	-25.4607	29.9187	WGS84	36S	MA	Mottled anorthosite, again a thin layer in gabbronorites
208252	7.20712e+06	1884.94	2020-12-23	RL	DR1	-25.2239	30.1043	WGS84	36S	GNO	Fine-grained gabbronorites, marginal zone
208393	7.20743e+06	1916.39	2020-12-23	RL	DR2	-25.2211	30.1058	WGS84	36S	GNO	Fine-grained gabbronorites, marginal zone
208527	7.20769e+06	1985.31	2020-12-23	RL	DR3	-25.2187	30.1072	WGS84	36S	TS	Transvaal quartzite (large in situ xenolith?)
208509	7.20773e+06	1985.82	2020-12-23	RL	DR4	-25.2184	30.107	WGS84	36S	GNO	Gabbronorites, marginal zone?
208466	7.20794e+06	1978.32	2020-12-23	RL	DR5	-25.2165	30.1066	WGS84	36S	GNO	Gabbronorites, marginal zone?
208449	7.20799e+06	1972.38	2020-12-23	RL	DR6	-25.216	30.1065	WGS84	36S	GNO	Gabbronorites, marginal zone?
208450	7.20822e+06	1950.35	2020-12-23	RL	DR7	-25.214	30.1065	WGS84	36S	GNO	Gabbronorites
208188	7.2084e+06	1922.74	2020-12-23	RL	DR8	-25.2123	30.104	WGS84	36S	GNO	Gabbronorites
208087	7.20844e+06	1916.14	2020-12-23	RL	DR9	-25.2119	30.103	WGS84	36S	GNO	Gabbronorites with layering		15	310
207988	7.20851e+06	1902.4	2020-12-23	RL	DR10	-25.2112	30.102	WGS84	36S	NO/GNO	Norite to gabbronorites
207909	7.20856e+06	1900.08	2020-12-23	RL	DR11	-25.2108	30.1012	WGS84	36S	CRT	Patches of massive chromitite in norites/pyroxenites, Critical Zone
207968	7.20864e+06	1897.45	2020-12-23	RL	DR12	-25.2101	30.1019	WGS84	36S	CRT	Patches of massive chromitite in norites/pyroxenites, Critical Zone
207925	7.20887e+06	1883.68	2020-12-23	RL	DR13	-25.2081	30.1015	WGS84	36S	NO/GNO	Norites/gabbronorite
207749	7.20905e+06	1897.89	2020-12-23	RL	DR14	-25.2064	30.0998	WGS84	36S	NO/GNO	Norites/gabbronorite with two thin anorthosite layers (5-7 cm)		45
207718	7.20907e+06	1906.77	2020-12-23	RL	DR15	-25.2062	30.0995	WGS84	36S	GNO	Gabbronorites
207685	7.20909e+06	1919.43	2020-12-23	RL	DR16	-25.206	30.0991	WGS84	36S	MA+GNO	Trough with mottle anorthosites and pyroxenitic layers
207693	7.20917e+06	1945.42	2020-12-23	RL	DR17	-25.2053	30.0992	WGS84	36S	NO	Gabbronorites with pyroxenitic layers
207642	7.20924e+06	1963.39	2020-12-23	RL	DR18	-25.2046	30.0988	WGS84	36S	MA	Large boulders of mottled anorthosites
207596	7.20934e+06	1966.32	2020-12-23	RL	DR19	-25.2037	30.0983	WGS84	36S	MA	Large boulders of mottled anorthosites; igneous layering
207534	7.20943e+06	1954.93	2020-12-23	RL	DR20	-25.2029	30.0977	WGS84	36S	MA	Mottled anorthosites, 3-4 m thick layer in gabbronorites		12	300
207458	7.20956e+06	1935.95	2020-12-23	RL	DR21	-25.2017	30.097	WGS84	36S	MA	Large boulders of mottled anorthosites
207462	7.20961e+06	1935.52	2020-12-23	RL	DR22	-25.2013	30.097	WGS84	36S	GNO+MA	Gabbronorites with thin layers of anorthosites		10	300
207399	7.20965e+06	1932.06	2020-12-23	RL	DR23	-25.2008	30.0964	WGS84	36S	GNO+MA	Gabbronorites with thin layers of anorthosites		10	300
207321	7.2098e+06	1954.73	2020-12-23	RL	DR24	-25.1995	30.0957	WGS84	36S	MA	Mottled anorthosite, a layer with a total thicknes of about 50-70 m (interlayered with gabbronorites). This is the base of the Main Anorthosite Marker
207263	7.20981e+06	1959.97	2020-12-23	RL	DR25	-25.1994	30.0951	WGS84	36S	MA	Contact of of one sublayer of mottled anorthosite with the overlying gabbronorite
207252	7.20985e+06	1964	2020-12-23	RL	DR26	-25.1991	30.095	WGS84	36S	MA	Contact of of one sublayer of mottled anorthosite with the overlying gabbronorite
207170	7.20989e+06	1960.04	2020-12-23	RL	DR27	-25.1987	30.0942	WGS84	36S	MA	Mottled anorthosite outcrop
207122	7.20992e+06	1954.72	2020-12-23	RL	DR28	-25.1984	30.0937	WGS84	36S	MA	Contact of of one sublayer of mottled anorthosite with the overlying gabbronorite
206653	7.21019e+06	1905.76	2020-12-23	RL	DR29	-25.1958	30.0891	WGS84	36S	MA	Mottled anorthosite outcrop
206532	7.21013e+06	1892.21	2020-12-23	RL	DR30	-25.1964	30.0879	WGS84	36S	MA	Mottled anorthosite outcrop; fine-scale layering with gabbronorites
206462	7.21012e+06	1898.3	2020-12-23	RL	DR31	-25.1964	30.0872	WGS84	36S	MA	Layering with mottled anorthosites and gabbronorites; This is likely a top of the Main Anorthosite Marker
206399	7.21015e+06	1903.37	2020-12-23	RL	DR32	-25.1962	30.0866	WGS84	36S	GNO	Finally, gabbronorites!
206335	7.21014e+06	1905.71	2020-12-23	RL	DR33	-25.1962	30.086	WGS84	36S	GNO	Gabbronorites
206633	7.20978e+06	1846.19	2020-12-23	RL	DR34	-25.1995	30.0889	WGS84	36S	GNO	Gabbronorite with layers of mottled anorthosites
206760	7.20944e+06	1849.96	2020-12-23	RL	DR35	-25.2026	30.09	WGS84	36S	GNO	Gabbronorite with layers of mottled anorthosites
206874	7.20934e+06	1847.63	2020-12-23	RL	DR36	-25.2036	30.0912	WGS84	36S	GNO	Gabbronorites
206978	7.20929e+06	1861.42	2020-12-23	RL	DR37	-25.204	30.0922	WGS84	36S	GNO	Gabbronorites
207011	7.20925e+06	1868.42	2020-12-23	RL	DR38	-25.2044	30.0925	WGS84	36S	MA	Mottled anorthosite outcrop
207058	7.20918e+06	1878.27	2020-12-23	RL	DR39	-25.205	30.0929	WGS84	36S	MA	Mottled anorthosite outcrop; fine-scale layering with gabbronorites
207265	7.20876e+06	1862.83	2020-12-23	RL	DR40	-25.2089	30.0949	WGS84	36S	GNO	Boulder of gabbronorites
207287	7.20872e+06	1857.06	2020-12-23	RL	DR41	-25.2093	30.0951	WGS84	36S	MA+GNO	Few layers of mottled anorthosites in gabbronorites (like marker?)		45	320
207477	7.20851e+06	1861.1	2020-12-23	RL	DR42	-25.2112	30.097	WGS84	36S	NO	Norites (Critical Zone?)
207890	7.20795e+06	1926.46	2020-12-23	RL	DR43	-25.2163	30.1009	WGS84	36S	TS	Transvaal quartzite (large in situ xenolith?)
207976	7.20781e+06	1938.07	2020-12-23	RL	DR44	-25.2176	30.1017	WGS84	36S	GNO	Gabbronorites, marginal zone?
207979	7.2066e+06	1878.76	2020-12-23	RL	DR45	-25.2285	30.1015	WGS84	36S	GNO	Gabbronorites, marginal zone?
207469	7.20642e+06	1867.66	2020-12-23	RL	DR46	-25.23	30.0964	WGS84	36S	GNO	Gabbronorites, marginal zone?
191787	7.15427e+06	1694.42	2021-08-09	RL	BEL-2	-25.6971	29.929	WGS85	36S	MA+GNO	Mottled anorthosite boulders; fine-scale layering with gabbronorites
192073	7.15469e+06	1726.37	2021-08-09	RL	BEL-3	-25.6934	29.932	WGS86	36S	GNO+MA	Gabbronorites with thin layers of anorthosites, outcrop
191690	7.15475e+06	1732.39	2021-08-09	RL	BEL-4	-25.6928	29.9282	WGS87	36S	GNO	Gabbronorite outcrop
191960	7.15539e+06	1762.31	2021-08-09	RL	BEL-5	-25.6871	29.931	WGS88	36S	GNO	Gabbronorite outcrop
192404	7.15553e+06	1764.81	2021-08-09	RL	BEL-6	-25.686	29.9354	WGS89	36S	MA	Mottled anorthosite outcrop
192645	7.15561e+06	1759.31	2021-08-09	RL	BEL-7	-25.6853	29.9379	WGS90	36S	GNO	Marginal fine-grained gabbronorite outcrop
192825	7.15558e+06	1765.59	2021-08-09	RL	BEL-8	-25.6855	29.9396	WGS91	36S	BA	Dullstroom basalts outcrop
195294	7.19445e+06	1761.58	2021-08-11	RL	TO-12	-25.3356	29.973	WGS93	36S	MA	Mottled anorthosite outcrop
195268	7.19442e+06	1762.12	2021-08-11	RL	TO-13	-25.3358	29.9728	WGS94	36S	MA	Mottled anorthosite outcrop
194980	7.19431e+06	1757.79	2021-08-11	RL	TO-14	-25.3367	29.9699	WGS95	36S	BA	The 0.5 m thick and a few m long xenolith of hornfelsed basalts in gabbronorite
194884	7.19426e+06	1757.79	2021-08-11	RL	TO-15	-25.3372	29.9689	WGS96	36S	MA	The 0.8 m thick layer of mottled anorthosite in gabbronorite			180
194773	7.19417e+06	1742.18	2021-08-11	RL	TO-16	-25.338	29.9678	WGS97	36S	MA	Mottled anorthosite outcrop and boulders
194728	7.19412e+06	1734.5	2021-08-11	RL	TO-17	-25.3384	29.9673	WGS98	36S	MA	Mottled anorthosite outcrop
194564	7.19379e+06	1698.56	2021-08-11	RL	TO-18	-25.3413	29.9656	WGS99	36S	MA	Mottled anorthosite outcrop, a layer of up to 0.5-1.0 m thick
194463	7.19374e+06	1693.9	2021-08-11	RL	TO-19	-25.3418	29.9646	WGS100	36S	MA	Mottled anorthosite outcrop, a layer of up to 0.5-1.0 m thick
194437	7.19369e+06	1692.93	2021-08-11	RL	TO-20	-25.3422	29.9644	WGS101	36S	MA	Mottled anorthosite outcrop, a layer of up to 0.5-1.0 m thick (the same layer as in TO-19)
194005	7.1934e+06	1681.65	2021-08-11	RL	TO-21	-25.3447	29.96	WGS102	36S	GNO	Gabbronorite outcrop
194030	7.19341e+06	1675.5	2021-08-11	RL	TO-22	-25.3447	29.9603	WGS103	36S	MA	The 1.0 m thick layer of mottled anorthosite in gabbronorite
194236	7.19336e+06	1667.07	2021-08-11	RL	TO-23	-25.3452	29.9623	WGS104	36S	MA	Mottled anorthosite outcrop and boulders (a large exposure)
206632	7.20542e+06	1882.39	2021-08-12	RL	RUS-1	-25.2389	30.0879	WGS111	36S	GNO	Marginal fine-grained gabbronorite outcrop
206058	7.20646e+06	1817.1	2021-08-12	RL	RUS-2	-25.2294	30.0824	WGS112	36S	GNO	Gabbronorite outcrop
205007	7.2067e+06	1813.93	2021-08-12	RL	RUS-3	-25.227	30.0721	WGS113	36S	MA	Mottled anorthosite outcrop
204892	7.20663e+06	1814.49	2021-08-12	RL	RUS-4	-25.2276	30.0709	WGS114	36S	MA	Mottled anorthosite outcrop
204734	7.20661e+06	1812.78	2021-08-12	RL	RUS-5	-25.2278	30.0693	WGS115	36S	MA	Mottled anorthosite outcrop
204602	7.20659e+06	1808	2021-08-12	RL	RUS-6	-25.2279	30.068	WGS116	36S	MA	Mottled anorthosite outcrop
204563	7.20666e+06	1808.06	2021-08-12	RL	RUS-7	-25.2273	30.0677	WGS117	36S	GNO	Gabbronorite outcrop
204276	7.20671e+06	1803.96	2021-08-12	RL	RUS-8	-25.2268	30.0648	WGS118	36S	GNO+MA	Gabbronorites with a thin layer of anorthosites
204187	7.20668e+06	1803.47	2021-08-12	RL	RUS-9	-25.2271	30.0639	WGS119	36S	MA	Mottled anorthosite outcrop (a large exposure)
204071	7.20648e+06	1801.97	2021-08-12	RL	RUS-10	-25.2288	30.0628	WGS120	36S	GNO+MA	Gabbronorites with two thin layers of anorthosites
203989	7.20589e+06	1789.15	2021-08-12	RL	RUS-11	-25.2341	30.0618	WGS121	36S	GNO	Gabbronorite outcrop
203887	7.20592e+06	1789	2021-08-12	RL	RUS-12	-25.2338	30.0608	WGS122	36S	GNO	Gabbronorite outcrop
203835	7.206e+06	1789.44	2021-08-12	RL	RUS-13	-25.2331	30.0603	WGS123	36S	GNO	Gabbronorite outcrop
203729	7.20596e+06	1786.11	2021-08-12	RL	RUS-14	-25.2335	30.0592	WGS124	36S	GNO	Gabbronorite outcrop
203982	7.2064e+06	1800.35	2021-08-12	RL	RUS-15	-25.2295	30.0619	WGS125	36S	MA	Mottled anorthosite outcrop
203833	7.2064e+06	1793.63	2021-08-12	RL	RUS-16	-25.2295	30.0604	WGS126	36S	MA	Mottled anorthosite outcrop
203690	7.20639e+06	1788.63	2021-08-12	RL	RUS-17	-25.2295	30.059	WGS127	36S	MA	Mottled anorthosite outcrop
203662	7.20633e+06	1787.92	2021-08-12	RL	RUS-18	-25.2301	30.0587	WGS128	36S	MA	Mottled anorthosite outcrop
203656	7.20639e+06	1787.98	2021-08-12	RL	RUS-19	-25.2295	30.0586	WGS129	36S	MA	Mottled anorthosite outcrop
203620	7.20649e+06	1785.5	2021-08-12	RL	RUS-20	-25.2287	30.0583	WGS130	36S	GNO	Gabbronorite outcrop
203406	7.20652e+06	1784.08	2021-08-12	RL	RUS-21	-25.2283	30.0562	WGS131	36S	MA+GNO	Gabbronorites with a 20 cm thick layer of anorthosites
203367	7.20653e+06	1783.97	2021-08-12	RL	RUS-22	-25.2282	30.0558	WGS132	36S	GNO	Gabbronorite outcrop
203262	7.20654e+06	1784.11	2021-08-12	RL	RUS-23	-25.2281	30.0547	WGS133	36S	GNO+MA	Gabbronorites with thin layers of anorthosites
203231	7.20657e+06	1782.47	2021-08-12	RL	RUS-24	-25.2278	30.0544	WGS134	36S	GNO+MA	Gabbronorites with thin layers of anorthosites
203272	7.20662e+06	1785.81	2021-08-12	RL	RUS-25	-25.2274	30.0549	WGS135	36S	GNO+MA	Gabbronorites with a 0.3-0.4 m thick layer of anorthosites
203077	7.20691e+06	1775.82	2021-08-12	RL	RUS-26	-25.2247	30.053	WGS136	36S	GNO	Gabbronorite outcrop
203153	7.20689e+06	1779.87	2021-08-12	RL	RUS-27	-25.225	30.0537	WGS137	36S	GNO	Gabbronorite outcrop
199888	7.20744e+06	1767.92	2021-08-12	RL	RUS-28	-25.2193	30.0215	WGS138	36S	GNO	Gabbronorite outcrop

## Sheet: Hornsey Bevington Obs
EAST	NORTH	RL	Date	Geologist	Waypoint ID	Lat	Long	Datum	Zone	Lith_Code1	Geology_Description	Photo_Ref	S0_Dip	S0_Dip_Dir
195131	7.15604e+06	1837.69	2009-01-28	RH_SAB	WPT001	-25.6819	29.9627	WGS84	36S	Volcanic	Volcanics with amygdaloidal texture	2009_1_28 WPT01(2 photos)
192583	7.15551e+06	1763.98	2009-01-28	RH_SAB	WPT002	-25.6861	29.9372	WGS84	36S	Mottled Anorthosite	Mottled anorthosite/norite contact	2009_1_28 WPT02(2 photos)
192553	7.1555e+06	1764.72	2009-01-28	RH_SAB	WPT003	-25.6862	29.9369	WGS84	36S	Mottled Anorthosite	Mottled anorthosite/norite contact	2009_1_28 WPT03(5 photos)
192529	7.15551e+06	1765.53	2009-01-28	RH_SAB	WPT004	-25.6862	29.9367	WGS84	36S	Norite	Leuconorite	2009_1_28 WPT04(1 photo)
192487	7.15553e+06	1766	2009-01-28	RH_SAB	WPT005	-25.6859	29.9363	WGS84	36S	Norite	With pegmatitic patches	2009_1_28 WPT05(1 photo)
192457	7.15554e+06	1765.07	2009-01-28	RH_SAB	WPT006	-25.6858	29.936	WGS84	36S	Mottled Anorthosite	With pegmatitic veins	2009_1_28 WPT06(2 photos)
192407	7.15553e+06	1764.91	2009-01-28	RH_SAB	WPT007	-25.6859	29.9355	WGS84	36S	Mottled Anorthosite	Giant mottled anorthosite	2009_1_28 WPT07(3 photos)
192402	7.15552e+06	1764.9	2009-01-28	RH_SAB	WPT008	-25.686	29.9354	WGS84	36S	Mottled Anorthosite	Contact between anothosite and norite	NA
192392	7.15551e+06	1765	2009-01-28	RH_SAB	WPT009	-25.6861	29.9353	WGS84	36S	Norite		2009_1_28 WPT09(1 photo)
192365	7.15547e+06	1766.43	2009-01-28	RH_SAB	WPT010	-25.6865	29.9351	WGS84	36S	Norite	Layering developed	NA
192636	7.15561e+06	1759.03	2009-01-28	RH_SAB	WPT011	-25.6852	29.9378	WGS84	36S	Norite		2009_1_28 WPT11(1 photo)
192656	7.1556e+06	1760.01	2009-01-28	RH_SAB	WPT012	-25.6854	29.938	WGS84	36S	Norite	Cuspate features in norite	2009_1_28 WPT12(2 photos)
192759	7.15556e+06	1762	2009-01-28	RH_SAB	WPT013	-25.6857	29.939	WGS84	36S	Soil	Track samples from roadside	2009_1_28 WPT13(1 photo)
192674	7.15552e+06	1763.7	2009-01-28	RH_SAB	WPT014	-25.6861	29.9381	WGS84	36S	Soil	Track samples from roadside	2009_1_28 WPT14(1 photo)
195255	7.15606e+06	1846.31	2009-01-28	RH_SAB	WPT015	-25.6817	29.964	WGS84	36S	Shale	Footwall sediments	NA	9	335
193725	7.15765e+06	1752.8	2009-01-28	RH_SAB	WPT016	-25.6671	29.9491	WGS84	36S	Norite	Marginal Zone	NA
193540	7.15775e+06	1753.26	2009-01-28	RH_SAB	WPT017	-25.6662	29.9473	WGS84	36S	Unknown Rock	Possibly marginal zone rocks, Sequence may be opening up	NA
193313	7.158e+06	1741.79	2009-01-28	RH_SAB	WPT018	-25.6638	29.9451	WGS84	36S	Norite	Marginal, getting more mafic	NA
193105	7.15855e+06	1723.23	2009-01-28	RH_SAB	WPT019	-25.6588	29.9431	WGS84	36S	Dolerite	Dyke	NA
192901	7.15949e+06	1659.56	2009-01-28	RH_SAB	WPT020	-25.6503	29.9413	WGS84	36S	Pyroxenite	Hornfelsed xenolith (in-situ) as well as pyroxenite boulder on side of road (sample taken of PX)	2009_1_28 WPT20(2 photos)
192323	7.15981e+06	1638.81	2009-01-28	RH_SAB	WPT021	-25.6473	29.9356	WGS84	36S	Pyroxenite	Weathered in-situ pyroxenite	2009_1_28 WPT21(1 photo)
192330	7.15981e+06	1637.67	2009-01-28	RH_SAB	WPT022	-25.6473	29.9357	WGS84	36S	Soil	Track samples from roadside	2009_1_28 WPT22(1 photo)
192374	7.15984e+06	1634.86	2009-01-28	RH_SAB	WPT023	-25.647	29.9362	WGS84	36S	Pyroxenite	Weathered in-situ pyroxenite	2009_1_28 WPT23(2 photos)
192387	7.15985e+06	1634.24	2009-01-28	RH_SAB	WPT024	-25.647	29.9363	WGS84	36S	Soil	Track samples from roadside	2009_1_28 WPT24(1 photo)
192394	7.15985e+06	1633.77	2009-01-28	RH_SAB	WPT025	-25.647	29.9364	WGS84	36S	Soil	Track samples from roadside	2009_1_28 WPT25(2 photos)
194544	7.16749e+06	1713.66	2009-01-28	RH_SAB	WPT026	-25.5785	29.9595	WGS84	36S	Pyroxenite	Lower Zone contact	NA
192901	7.16787e+06	1644.81	2009-01-28	RH_SAB	WPT027	-25.5748	29.9432	WGS84	36S	Soil	Track samples from roadside, possibly containing chromite	2009_1_28 WPT27(1 photo)
191442	7.17829e+06	1610.09	2009-07-09	RH_SAB	WEIR	-25.4805	29.9311	WGS84	36S	Gabbro	Epidotised and K-metasomatised basal Marginal Zone (H. Wilsenach's farm weir)
