# Supplementary material for: A 5-km-thick reservoir with > 380,000 km3 of magma within the ancient Earth's crust
Source: Sci Rep. 2022 Sep 19;12:15651. doi: 10.1038/s41598-022-19915-w (PMC9485162; doi:10.1038/s41598-022-19915-w)
Supplement: Supplementary file 8 — Supplementary Information 8. [file 41598_2022_19915_MOESM8_ESM.xlsx]

## Sheet: SuplTable S1
SupplTable S1: Compositions of modeled MZ- R- and O-magmas
Symbol	SiO2	TiO2	Al2O3	Fe2O3	Cr2O3	FeO	MnO	MgO	CaO	Na2O	K2O	H2O	Mg#
MZ-magma	55.338	0.145	16.829	1.295	0.0001	6.658	0.21	5.335	8.203	4.839	0.105	1.052	58.5
R-magma	55.844	0.164	16.481	1.384	0.0001	7.063	0.243	4.677	7.556	5.253	0.119	1.213	54.1
O-magma	55.325	0.132	17.961	0.673	0.01	3.97	0.203	8.22	10.858	2.343	0.101	0.203	78.7
