# Supplementary material for: A 5-km-thick reservoir with > 380,000 km3 of magma within the ancient Earth's crust
Source: Sci Rep. 2022 Sep 19;12:15651. doi: 10.1038/s41598-022-19915-w (PMC9485162; doi:10.1038/s41598-022-19915-w)
Supplement: Supplementary file 9 — Supplementary Information 9. [file 41598_2022_19915_MOESM9_ESM.xlsx]

## Sheet: alphaMELTS_tbl
SupplTable S2A: Fractional cryustallization of dry MORB tholeiite at 2 kbar
MORB composition from Allan et al. (1989), see Ghiorso et al. (1997)
System	Thermodynamic	Data:
Pressure	Temperature	mass	F	phi	S	H	V	dVdP*10^6	dVdT*10^6	Cp	logfO2(absolute)	logfO2-QFM	rhol	rhos	viscosity	aH2O	chisqr
2000	1400	100.201	1	1	286.914	-1.20838e+06	37.4021	-191.02	2510.73	152.832	-6.318	0	2.67902	0	1.488	1.66676e-05	0
2000	1400	100.201	1	1	286.914	-1.20838e+06	37.4021	-191.02	2510.73	152.832	-6.318	0	2.67902	0	1.488	1.66676e-05	0
2000	1395	100.201	1	1	286.457	-1.20915e+06	37.3896	-191.088	2510.75	152.832	-6.362	0	2.67991	0	1.505	1.66649e-05	0
2000	1390	100.201	1	1	285.998	-1.20991e+06	37.3771	-191.156	2510.76	152.832	-6.406	0	2.68081	0	1.522	1.66622e-05	0
2000	1385	100.201	1	1	285.538	-1.21068e+06	37.3646	-191.225	2510.78	152.833	-6.45	0	2.68171	0	1.54	1.66596e-05	0
2000	1380	100.201	1	1	285.077	-1.21144e+06	37.3521	-191.293	2510.79	152.833	-6.495	0	2.68261	0	1.557	1.66572e-05	0
2000	1375	100.201	1	1	284.614	-1.21221e+06	37.3397	-191.362	2510.81	152.834	-6.54	0	2.68351	0	1.575	1.66548e-05	0
2000	1370	100.201	1	1	284.15	-1.21297e+06	37.3272	-191.431	2510.83	152.834	-6.585	0	2.6844	0	1.592	1.66525e-05	0
2000	1365	100.201	1	1	283.685	-1.21374e+06	37.3147	-191.499	2510.85	152.835	-6.63	0	2.6853	0	1.61	1.66503e-05	0
2000	1360	100.202	1	1	283.218	-1.21451e+06	37.3023	-191.568	2510.87	152.835	-6.676	0	2.6862	0	1.628	1.66482e-05	0
2000	1355	100.202	1	1	282.749	-1.21527e+06	37.2898	-191.637	2510.9	152.836	-6.722	0	2.6871	0	1.646	1.66462e-05	0
2000	1350	100.202	1	1	282.28	-1.21604e+06	37.2774	-191.706	2510.92	152.836	-6.768	0	2.688	0	1.664	1.66443e-05	0
2000	1345	100.202	1	1	281.808	-1.2168e+06	37.2649	-191.776	2510.94	152.837	-6.815	0	2.68891	0	1.682	1.66425e-05	0
2000	1340	100.202	1	1	281.336	-1.21757e+06	37.2525	-191.845	2510.97	152.838	-6.862	0	2.68981	0	1.7	1.66409e-05	0
2000	1335	100.202	1	1	280.861	-1.21833e+06	37.24	-191.914	2511	152.838	-6.909	0	2.69071	0	1.718	1.66393e-05	0
2000	1330	100.202	1	1	280.386	-1.2191e+06	37.2276	-191.984	2511.02	152.839	-6.956	0	2.69161	0	1.737	1.66379e-05	0
2000	1325	100.202	1	1	279.909	-1.21987e+06	37.2152	-192.054	2511.05	152.839	-7.004	0	2.69252	0	1.756	1.66366e-05	0
2000	1320	100.203	1	1	279.43	-1.22063e+06	37.2027	-192.123	2511.08	152.84	-7.052	0	2.69342	0	1.774	1.66354e-05	0
2000	1315	100.203	1	1	278.95	-1.2214e+06	37.1903	-192.193	2511.11	152.841	-7.1	0	2.69432	0	1.793	1.66344e-05	0
2000	1310	100.203	1	1	278.468	-1.22217e+06	37.1779	-192.263	2511.15	152.842	-7.149	0	2.69523	0	1.812	1.66334e-05	0
2000	1305	100.203	1	1	277.985	-1.22293e+06	37.1655	-192.334	2511.18	152.842	-7.198	0	2.69613	0	1.831	1.66326e-05	0
2000	1300	100.203	1	1	277.501	-1.2237e+06	37.153	-192.404	2511.22	152.843	-7.247	0	2.69704	0	1.85	1.6632e-05	0
2000	1295	100.203	1	1	277.014	-1.22446e+06	37.1406	-192.474	2511.25	152.844	-7.296	0	2.69794	0	1.87	1.66315e-05	0
2000	1290	100.203	1	1	276.527	-1.22523e+06	37.1282	-192.545	2511.29	152.845	-7.346	0	2.69885	0	1.889	1.66311e-05	0
2000	1285	100.204	1	1	276.037	-1.226e+06	37.1158	-192.616	2511.33	152.846	-7.396	0	2.69976	0	1.909	1.66309e-05	0
2000	1280	100.204	1	1	275.547	-1.22676e+06	37.1034	-192.687	2511.37	152.847	-7.447	0	2.70066	0	1.928	1.66308e-05	0
2000	1275	100.204	1	1	275.054	-1.22753e+06	37.091	-192.758	2511.41	152.848	-7.498	0	2.70157	0	1.948	1.66309e-05	0
2000	1270	100.204	1	1	274.56	-1.2283e+06	37.0786	-192.829	2511.46	152.849	-7.549	0	2.70248	0	1.968	1.66312e-05	0
2000	1265	100.204	1	1	274.065	-1.22907e+06	37.0663	-192.901	2511.5	152.85	-7.6	0	2.70339	0	1.988	1.66316e-05	0
2000	1260	100.205	1	1	273.567	-1.22983e+06	37.0539	-192.973	2511.55	152.851	-7.652	0	2.7043	0	2.008	1.66321e-05	0
2000	1255	100.205	1	1	273.068	-1.2306e+06	37.0415	-193.044	2511.59	152.852	-7.704	0	2.7052	0	2.029	1.66329e-05	0
2000	1250	100.205	1	1	272.568	-1.23137e+06	37.0291	-193.116	2511.64	152.853	-7.757	0	2.70611	0	2.049	1.66338e-05	0
2000	1245	100.205	0.993716	0.993641	271.922	-1.23235e+06	37.0081	-192.074	2503.66	152.682	-7.81	0	2.70786	2.67557	2.063	1.69033e-05	0
2000	1240	99.5766	0.976423	0.976099	269.329	-1.22532e+06	36.7283	-187.648	2468.36	151.267	-7.863	0	2.71207	2.67441	2.058	1.79678e-05	0
2000	1235	97.23	0.976919	0.976555	262.519	-1.1947e+06	35.8076	-182.496	2419.45	147.755	-7.917	0	2.71635	2.67321	2.053	1.9086e-05	0
2000	1230	94.9838	0.927453	0.929391	254.806	-1.16718e+06	34.8455	-171.187	2300.57	142.641	-7.97	0	2.72017	2.80069	2.077	2.23194e-05	0
2000	1225	88.0926	0.890712	0.89666	234.917	-1.07935e+06	32.1075	-154.425	2103.12	130.788	-8.025	0	2.72547	2.9016	2.094	2.80692e-05	0
2000	1220	78.4661	0.887003	0.893535	208.795	-955785	28.5156	-137.994	1881.27	115.952	-8.079	0	2.73157	2.92053	2.108	3.55462e-05	0
2000	1215	69.602	0.897104	0.902895	185.084	-841908	25.2583	-124.257	1688.42	102.677	-8.134	0	2.73793	2.91991	2.119	4.40801e-05	0
2000	1210	62.4427	0.905617	0.910695	165.899	-750149	22.6237	-112.897	1531.47	91.9397	-8.19	0	2.74467	2.91699	2.126	5.37317e-05	0
2000	1205	56.5518	0.912633	0.91709	150.085	-674778	20.4509	-103.317	1401.34	81.473	-8.245	0	2.75181	2.91392	2.131	6.45989e-05	0
2000	1200	51.6138	0.918448	0.92236	136.81	-611699	18.6256	-95.098	1291.57	74.1733	-8.302	0	2.75937	2.91073	2.132	7.68057e-05	0
2000	1195	47.4074	0.923306	0.926731	125.486	-558050	17.0675	-87.9422	1197.6	67.9546	-8.358	0	2.76738	2.9075	2.13	9.05038e-05	0
2000	1190	43.7745	0.927353	0.930342	115.693	-511783	15.7189	-81.6281	1116.11	62.5852	-8.415	0	2.77589	2.90435	2.124	0.000105886	0
2000	1185	40.5977	0.924684	0.927602	107.085	-471434	14.5231	-75.4427	1042.98	57.8628	-8.472	0	2.78659	2.90808	2.1	0.000125098	0
2000	1180	37.5433	0.927925	0.93037	98.8655	-432622	13.3832	-69.8226	975.794	53.3864	-8.53	0	2.7979	2.90374	2.073	0.00014702	0
2000	1175	34.8408	0.931884	0.933896	91.5952	-398311	12.3738	-64.8398	916.618	49.4368	-8.588	0	2.80962	2.90138	2.044	0.000171565	0
2000	1170	32.4711	0.935222	0.936852	85.213	-368268	11.4874	-60.3981	864.385	45.9738	-8.646	0	2.82175	2.89962	2.012	0.000199055	0
2000	1165	30.3714	0.937962	0.939265	79.5516	-341690	10.7009	-56.3994	817.725	42.9052	-8.705	0	2.83426	2.89909	1.979	0.000229893	0
2000	1160	28.491	0.940087	0.94113	74.4768	-317940	9.99598	-52.7642	775.485	40.1569	-8.765	0	2.84708	2.9007	1.944	0.000264578	0
2000	1155	26.788	0.941511	0.94238	69.8768	-296497	9.35742	-49.4253	736.628	37.6665	-8.824	0	2.86011	2.90595	1.908	0.000303751	0
2000	1150	25.2254	0.941728	0.942607	65.6509	-276918	8.77189	-46.314	699.94	35.376	-8.885	0	2.87303	2.91974	1.874	0.000348356	0
2000	1145	23.762	0.92887	0.931995	61.6162	-258842	8.21857	-43.0677	657.18	33.1276	-8.945	0	2.88156	3.02414	1.861	0.000404239	0
2000	1140	22.0898	0.857238	0.872976	56.7333	-239559	7.5797	-38.3169	573.534	30.1478	-9.006	0	2.8618	3.27542	1.984	0.000501367	0
2000	1135	18.9517	0.872953	0.887701	48.7527	-205523	6.5571	-34.1913	491.707	25.8297	-9.067	0	2.84224	3.2698	2.102	0.000604302	0
2000	1130	16.5564	0.893765	0.906108	42.6822	-179624	5.77755	-31.0759	432.011	22.576	-9.129	0	2.82661	3.24237	2.198	0.000707016	0
2000	1125	14.8081	0.909045	0.919532	38.2228	-160670	5.20237	-28.6551	387.901	20.1874	-9.192	0	2.81395	3.2174	2.278	0.000809534	0
2000	1120	13.4706	0.9205	0.929569	34.7914	-146127	4.75803	-26.7028	353.867	18.3518	-9.254	0	2.8035	3.19569	2.345	0.000911984	0
2000	1115	12.4081	0.929334	0.937306	32.0521	-134547	4.40212	-25.083	326.693	16.8891	-9.318	0	2.79471	3.17706	2.403	0.00101448	0
2000	1110	11.5392	0.934561	0.941934	29.7982	-125064	4.10832	-23.6906	304.108	15.6808	-9.381	0	2.78676	3.1654	2.457	0.00111984	0
2000	1105	10.7926	0.937082	0.944235	27.8545	-116911	3.85407	-22.4561	284.578	14.6307	-9.445	0	2.7791	3.15949	2.515	0.00123123	0
2000	1100	10.1216	0.9428	0.949231	26.1156	-109567	3.62603	-21.3795	267.852	13.7001	-9.51	0	2.77247	3.14495	2.566	0.00134245	0
2000	1095	9.55045	0.947281	0.953164	24.629	-103309	3.43075	-20.4345	253.563	12.9106	-9.575	0	2.76659	3.13347	2.612	0.001454	0
2000	1090	9.05447	0.951209	0.956619	23.3352	-97870.8	3.26046	-19.5965	241.182	12.2209	-9.64	0	2.76134	3.12341	2.654	0.0015655	0
2000	1085	8.61999	0.954546	0.959567	22.1986	-93106.5	3.1107	-18.8467	230.333	11.6167	-9.706	0	2.75658	3.11519	2.693	0.00167692	0
2000	1080	8.23532	0.957416	0.962114	21.1897	-88890.2	2.97765	-18.1706	220.726	11.0819	-9.773	0	2.75221	3.10868	2.729	0.00178823	0
2000	1075	7.89164	0.959911	0.964341	20.2861	-85126.4	2.85845	-17.5569	212.142	10.6044	-9.84	0	2.74813	3.10376	2.763	0.00189937	0
2000	1070	7.58218	0.962101	0.966308	19.4708	-81742.2	2.75089	-16.9967	204.412	10.1747	-9.907	0	2.74427	3.10038	2.795	0.00201025	0
2000	1065	7.30165	0.964038	0.96806	18.7302	-78680.3	2.65322	-16.4829	197.401	9.78544	-9.975	0	2.74056	3.09854	2.826	0.00212079	0
2000	1060	7.04582	0.965761	0.969633	18.0536	-75895	2.56405	-16.0098	191.003	9.43079	-10.044	0	2.73696	3.09829	2.856	0.00223091	0
2000	1055	6.81128	0.967299	0.971052	17.4323	-73349.5	2.48225	-15.5726	185.13	9.10596	-10.113	0	2.73339	3.09975	2.885	0.00234048	0
2000	1050	6.59522	0.968677	0.972341	16.859	-71013.6	2.4069	-15.1675	179.711	8.80704	-10.183	0	2.72981	3.1031	2.914	0.00244942	0
2000	1045	6.39528	0.969909	0.973513	16.3278	-68862.3	2.33722	-14.7912	174.683	8.53073	-10.253	0	2.72614	3.10862	2.944	0.00255761	0
2000	1040	6.20948	0.971008	0.974583	15.8336	-66874.8	2.27257	-14.4411	169.994	8.27426	-10.323	0	2.72234	3.11669	2.973	0.00266494	0
2000	1035	6.03611	0.971979	0.975559	15.372	-65033.3	2.21239	-14.1148	165.598	8.03523	-10.394	0	2.7183	3.1279	3.004	0.00277131	0
2000	1030	5.87365	0.972823	0.976446	14.9391	-63322.9	2.15621	-13.8105	161.451	7.81153	-10.466	0	2.71395	3.14306	3.036	0.00287659	0
2000	1025	5.72076	0.973532	0.977246	14.5316	-61730.8	2.10361	-13.5268	157.513	7.60126	-10.538	0	2.70916	3.16336	3.07	0.00298069	0
2000	1020	5.57616	0.974089	0.977955	14.1461	-60245.8	2.05422	-13.2625	153.767	7.40344	-10.611	0	2.70377	3.19052	3.107	0.00308353	0
2000	1015	5.43863	0.974462	0.978563	13.7797	-58858.3	2.00769	-13.0166	150.122	7.21468	-10.684	0	2.69755	3.22701	3.148	0.00318505	0
2000	1010	5.30688	0.974603	0.979052	13.429	-57559.8	1.96371	-12.7888	146.551	7.03403	-10.758	0	2.6902	3.2764	3.194	0.00328526	0
2000	1005	5.17934	0.97385	0.978928	13.0895	-56341.6	1.92196	-12.5764	142.917	6.85817	-10.833	0	2.68085	3.34421	3.25	0.00338555	0
2000	1000	5.05147	0.973491	0.979196	12.7524	-55169.9	1.88112	-12.38	139.24	6.6834	-10.908	0	2.6697	3.42177	3.315	0.00348477	0
2000	995	4.92553	0.972901	0.979366	12.4221	-54069.2	1.84201	-12.2015	135.503	6.51187	-10.984	0	2.65634	3.51184	3.391	0.00358329	0
2000	990	4.80044	0.972225	0.979476	12.0967	-53033.2	1.80438	-12.0395	131.688	6.3425	-11.06	0	2.64074	3.60037	3.478	0.00368187	0
2000	985	4.67573	0.971907	0.97971	11.7755	-52053	1.768	-11.8906	127.85	6.1755	-11.137	0	2.62359	3.66167	3.572	0.00378113	0
2000	980	4.55249	0.972286	0.980182	11.4612	-51118.1	1.73277	-11.7491	124.093	6.01258	-11.214	0	2.60613	3.67412	3.669	0.00388128	0
2000	975	4.43359	0.97329	0.980926	11.1594	-50224.6	1.69893	-11.612	120.526	5.85672	-11.293	0	2.58933	3.6543	3.763	0.00398161	0
2000	970	4.32212	0.974489	0.981748	10.876	-49381.5	1.667	-11.479	117.212	5.71088	-11.371	0	2.57359	3.62387	3.851	0.00408127	0
2000	965	4.21851	0.975767	0.982601	10.6115	-48587.3	1.63702	-11.3502	114.153	5.57531	-11.451	0	2.55902	3.58909	3.934	0.00417967	0
2000	960	4.12265	0.977019	0.983434	10.3656	-47840.8	1.60895	-11.2256	111.339	5.44967	-11.531	0	2.5456	3.55459	4.011	0.00427639	0
2000	955	4.03399	0.979455	0.985143	10.1382	-47137.2	1.5829	-11.1102	108.817	5.33489	-11.611	0	2.53376	3.52425	4.082	0.00436428	0
2000	950	3.95701	0.979474	0.985129	9.93581	-46533.5	1.5598	-10.997	106.488	5.23244	-11.693	0	2.52231	3.50145	4.149	0.00445516	0
2000	945	3.88149	0.980511	0.985832	9.73835	-45922.1	1.53701	-10.8873	104.287	5.13278	-11.775	0	2.51173	3.47374	4.212	0.00454371	0
2000	940	3.81139	0.981469	0.986488	9.55378	-45347.1	1.51562	-10.7818	102.249	5.04001	-11.857	0	2.50193	3.44891	4.272	0.00462986	0
2000	935	3.74614	0.982357	0.987103	9.38087	-44806	1.49554	-10.6804	100.356	4.95348	-11.941	0	2.49284	3.42657	4.327	0.00471355	0
2000	930	3.68531	0.983184	0.98768	9.21854	-44296.2	1.47664	-10.583	98.5938	4.87262	-12.025	0	2.48438	3.40639	4.38	0.00479476	0
2000	925	3.62849	0.983956	0.988222	9.06585	-43815.5	1.45885	-10.4895	96.9501	4.79693	-12.11	0	2.47649	3.38812	4.43	0.00487347	0
2000	920	3.57532	0.984678	0.988733	8.92197	-43362.1	1.44207	-10.3997	95.4139	4.72595	-12.195	0	2.46912	3.37155	4.477	0.00494969	0
2000	915	3.52549	0.985356	0.989215	8.78617	-42934.2	1.42624	-10.3135	93.9757	4.65932	-12.281	0	2.46224	3.35651	4.522	0.00502343	0
2000	910	3.47874	0.985993	0.989671	8.6578	-42530	1.41128	-10.2308	92.6269	4.59667	-12.368	0	2.45579	3.34285	4.564	0.00509471	0
2000	905	3.43481	0.986592	0.990103	8.53628	-42148.1	1.39714	-10.1513	91.3602	4.5377	-12.456	0	2.44975	3.33044	4.605	0.00516357	0
2000	900	3.3935	0.987158	0.990512	8.42108	-41787.2	1.38375	-10.075	90.1689	4.48214	-12.544	0	2.44408	3.31917	4.645	0.00523003	0
Title:	Allan	et	al.	1989	(see	Ghiorso	1997)
Liquid	Composition:
Pressure	Temperature	mass	SiO2	TiO2	Al2O3	Fe2O3	Cr2O3	FeO	MgO	CaO	Na2O	K2O	P2O5	H2O
2000	1400	100.201	48.5824	1.00798	17.6046	1.29477	0.0299399	7.20896	9.08176	12.425	2.64469	0.0299399	0.0798397	0.00997996
2000	1400	100.201	48.5824	1.00798	17.6046	1.29477	0.0299399	7.20896	9.08176	12.425	2.64469	0.0299399	0.0798397	0.00997996
2000	1395	100.201	48.5824	1.00798	17.6046	1.29554	0.0299399	7.20827	9.08176	12.425	2.64469	0.0299399	0.0798396	0.00997995
2000	1390	100.201	48.5824	1.00797	17.6046	1.29634	0.0299398	7.20754	9.08175	12.425	2.64469	0.0299398	0.0798395	0.00997994
2000	1385	100.201	48.5823	1.00797	17.6046	1.29718	0.0299398	7.20678	9.08174	12.425	2.64468	0.0299398	0.0798395	0.00997993
2000	1380	100.201	48.5823	1.00797	17.6046	1.29806	0.0299398	7.20598	9.08173	12.425	2.64468	0.0299398	0.0798394	0.00997993
2000	1375	100.201	48.5822	1.00797	17.6046	1.29898	0.0299397	7.20514	9.08172	12.425	2.64468	0.0299397	0.0798393	0.00997992
2000	1370	100.201	48.5822	1.00797	17.6046	1.29994	0.0299397	7.20427	9.08172	12.425	2.64468	0.0299397	0.0798393	0.00997991
2000	1365	100.201	48.5821	1.00797	17.6045	1.30095	0.0299397	7.20336	9.08171	12.425	2.64467	0.0299397	0.0798392	0.0099799
2000	1360	100.202	48.5821	1.00797	17.6045	1.30199	0.0299397	7.20241	9.0817	12.425	2.64467	0.0299397	0.0798391	0.00997989
2000	1355	100.202	48.582	1.00797	17.6045	1.30308	0.0299396	7.20142	9.08169	12.4249	2.64467	0.0299396	0.079839	0.00997988
2000	1350	100.202	48.582	1.00797	17.6045	1.30421	0.0299396	7.20039	9.08168	12.4249	2.64466	0.0299396	0.0798389	0.00997986
2000	1345	100.202	48.5819	1.00797	17.6045	1.30538	0.0299396	7.19933	9.08167	12.4249	2.64466	0.0299396	0.0798388	0.00997985
2000	1340	100.202	48.5819	1.00796	17.6044	1.3066	0.0299395	7.19822	9.08166	12.4249	2.64466	0.0299395	0.0798387	0.00997984
2000	1335	100.202	48.5818	1.00796	17.6044	1.30787	0.0299395	7.19707	9.08164	12.4249	2.64465	0.0299395	0.0798386	0.00997983
2000	1330	100.202	48.5817	1.00796	17.6044	1.30918	0.0299394	7.19588	9.08163	12.4249	2.64465	0.0299394	0.0798385	0.00997981
2000	1325	100.202	48.5817	1.00796	17.6044	1.31053	0.0299394	7.19465	9.08162	12.4249	2.64465	0.0299394	0.0798384	0.0099798
2000	1320	100.203	48.5816	1.00796	17.6043	1.31194	0.0299394	7.19338	9.08161	12.4248	2.64464	0.0299394	0.0798383	0.00997979
2000	1315	100.203	48.5815	1.00796	17.6043	1.31339	0.0299393	7.19206	9.08159	12.4248	2.64464	0.0299393	0.0798382	0.00997977
2000	1310	100.203	48.5815	1.00796	17.6043	1.31488	0.0299393	7.1907	9.08158	12.4248	2.64464	0.0299393	0.0798381	0.00997976
2000	1305	100.203	48.5814	1.00795	17.6043	1.31643	0.0299392	7.1893	9.08157	12.4248	2.64463	0.0299392	0.0798379	0.00997974
2000	1300	100.203	48.5813	1.00795	17.6042	1.31803	0.0299392	7.18784	9.08155	12.4248	2.64463	0.0299392	0.0798378	0.00997973
2000	1295	100.203	48.5812	1.00795	17.6042	1.31967	0.0299391	7.18635	9.08154	12.4247	2.64462	0.0299391	0.0798377	0.00997971
2000	1290	100.203	48.5811	1.00795	17.6042	1.32137	0.0299391	7.18481	9.08152	12.4247	2.64462	0.0299391	0.0798375	0.00997969
2000	1285	100.204	48.5811	1.00795	17.6041	1.32312	0.029939	7.18322	9.0815	12.4247	2.64461	0.029939	0.0798374	0.00997967
2000	1280	100.204	48.581	1.00795	17.6041	1.32493	0.029939	7.18158	9.08149	12.4247	2.64461	0.029939	0.0798373	0.00997966
2000	1275	100.204	48.5809	1.00794	17.6041	1.32678	0.0299389	7.17989	9.08147	12.4246	2.6446	0.0299389	0.0798371	0.00997964
2000	1270	100.204	48.5808	1.00794	17.604	1.32869	0.0299389	7.17816	9.08145	12.4246	2.6446	0.0299389	0.079837	0.00997962
2000	1265	100.204	48.5807	1.00794	17.604	1.33066	0.0299388	7.17637	9.08144	12.4246	2.64459	0.0299388	0.0798368	0.0099796
2000	1260	100.205	48.5806	1.00794	17.604	1.33268	0.0299387	7.17454	9.08142	12.4246	2.64459	0.0299387	0.0798366	0.00997958
2000	1255	100.205	48.5805	1.00794	17.6039	1.33476	0.0299387	7.17265	9.0814	12.4246	2.64458	0.0299387	0.0798365	0.00997956
2000	1250	100.205	48.5804	1.00793	17.6039	1.33689	0.0299386	7.17071	9.08138	12.4245	2.64458	0.0299386	0.0798363	0.00997954
2000	1245	99.5756	48.584	1.01431	17.5039	1.34718	0.0301279	7.21439	9.13879	12.3996	2.64724	0.0301042	0.080341	0.0100426
2000	1240	97.2289	48.5936	1.03879	17.123	1.38052	0.030855	7.38777	9.35936	12.3074	2.65547	0.0307336	0.0822801	0.010285
2000	1235	94.9858	48.5988	1.06332	16.7442	1.41399	0.0315837	7.56145	9.58038	12.2185	2.66168	0.0313571	0.0842231	0.0105279
2000	1230	88.093	48.772	1.14652	16.1562	1.49115	0.0340549	7.90733	9.38069	12.2516	2.72475	0.0335275	0.0908131	0.0113516
2000	1225	78.4651	48.7801	1.27346	15.8078	1.58987	0.0382336	8.48212	9.08377	11.9182	2.87443	0.0372638	0.101956	0.0127445
2000	1220	69.5996	48.7188	1.41659	15.5311	1.6941	0.0421968	9.13282	8.7628	11.4847	3.04601	0.0415772	0.114943	0.0143679
2000	1215	62.4402	48.6432	1.5597	15.2505	1.79514	0.0414501	9.77319	8.46053	11.0796	3.20661	0.0458839	0.128123	0.0160153
2000	1210	56.5492	48.547	1.70301	14.9654	1.89372	0.040487	10.4071	8.17701	10.7009	3.35608	0.0501717	0.14147	0.0176837
2000	1205	51.611	48.4302	1.84687	14.6752	1.99035	0.0392952	11.0369	7.91067	10.3464	3.49532	0.0544439	0.155006	0.0193757
2000	1200	47.4046	48.2925	1.99173	14.3794	2.08552	0.0378566	11.6651	7.6602	10.0139	3.62515	0.0587059	0.16876	0.021095
2000	1195	43.7716	48.1333	2.13804	14.0777	2.17967	0.0361454	12.2941	7.42459	9.7016	3.74629	0.0629629	0.182767	0.0228459
2000	1190	40.5944	47.9506	2.28633	13.7698	2.27324	0.0341268	12.9263	7.20307	9.40816	3.85951	0.0672222	0.197071	0.0246339
2000	1185	37.54	47.6248	2.45159	13.445	2.37746	0.031459	13.607	7.00633	9.1625	3.98227	0.0719137	0.213106	0.0266382
2000	1180	34.8374	47.2763	2.62051	13.1055	2.48315	0.0284843	14.2971	6.81487	8.94078	4.09838	0.0766325	0.229638	0.0287048
2000	1175	32.4676	46.9149	2.78907	12.7615	2.58793	0.025034	14.9905	6.63677	8.72887	4.2069	0.0812964	0.246399	0.0307999
2000	1170	30.3677	46.5418	2.9569	12.4128	2.6919	0.0209892	15.6882	6.47073	8.52583	4.30854	0.08591	0.263438	0.0329297
2000	1165	28.4872	46.1593	3.12308	12.0593	2.79515	0.0162831	16.3904	6.31526	8.3306	4.40421	0.0904833	0.280828	0.0351035
2000	1160	26.784	45.7708	3.28589	11.7011	2.8977	0.0110646	17.0968	6.1686	8.14189	4.49511	0.0950354	0.298686	0.0373357
2000	1155	25.2211	45.3819	3.44224	11.3389	2.99948	0.00587303	17.8057	6.02843	7.95797	4.58308	0.0996012	0.317194	0.0396493
2000	1150	23.7555	45.0062	3.5849	10.9743	3.10024	0.00172405	18.5119	5.88996	7.77555	4.67211	0.104275	0.336764	0.0420955
2000	1145	22.0718	44.829	3.6286	10.632	3.19537	2.32209e-05	19.1305	5.69397	7.5593	4.8131	0.110445	0.362453	0.0453067
2000	1140	18.9362	45.8516	3.14664	10.4604	3.25327	0	19.1183	5.14982	7.13559	5.28336	0.125777	0.42247	0.0528088
2000	1135	16.5439	46.85	2.69603	10.2798	3.30655	0	19.0343	4.65877	6.74715	5.74259	0.140851	0.483561	0.0604452
2000	1130	14.7975	47.6702	2.33543	10.0687	3.36188	0	18.983	4.25443	6.41811	6.14572	0.154338	0.540631	0.0675788
2000	1125	13.4612	48.3544	2.04156	9.8379	3.41879	0	18.9579	3.91458	6.1359	6.50385	0.16648	0.594299	0.0742873
2000	1120	12.3997	48.9362	1.79715	9.59563	3.47668	0	18.951	3.62317	5.89045	6.82638	0.177496	0.645178	0.0806473
2000	1115	11.5313	49.4397	1.59022	9.34731	3.53509	0	18.9559	3.36903	5.67434	7.12043	0.187557	0.693763	0.0867204
2000	1110	10.7841	49.9232	1.40838	9.10242	3.59275	0	18.9736	3.13738	5.45177	7.40292	0.197126	0.717761	0.0927291
2000	1105	10.1136	50.4363	1.24392	8.86729	3.64861	0	19.0092	2.91817	5.18904	7.68803	0.206588	0.694051	0.0988771
2000	1100	9.54269	50.8943	1.10174	8.62977	3.70466	0	19.0476	2.7233	4.95224	7.95201	0.215245	0.674363	0.104792
2000	1095	9.04696	51.3142	0.977039	8.39273	3.7605	0	19.0868	2.5475	4.73284	8.19999	0.223236	0.6547	0.110534
2000	1090	8.61269	51.699	0.867022	8.15698	3.81605	0	19.1237	2.3882	4.53154	8.43324	0.230591	0.637537	0.116108
2000	1085	8.22818	52.0553	0.769246	7.9236	3.87115	0	19.1567	2.24284	4.34583	8.65393	0.237368	0.622504	0.121534
2000	1080	7.88463	52.3885	0.681831	7.69333	3.92564	0	19.1841	2.10939	4.17365	8.86382	0.243616	0.609249	0.126829
2000	1075	7.57527	52.7029	0.603305	7.46677	3.9794	0	19.2048	1.98625	4.01334	9.06436	0.249376	0.597498	0.132008
2000	1070	7.29482	53.0022	0.532494	7.24432	4.0323	0	19.2174	1.87211	3.86354	9.25678	0.254684	0.58704	0.137084
2000	1065	7.03906	53.2897	0.468448	7.02634	4.0842	0	19.2208	1.76592	3.72311	9.44212	0.259573	0.577702	0.142064
2000	1060	6.80458	53.5682	0.410388	6.8131	4.13495	0	19.2137	1.66677	3.59112	9.62133	0.264073	0.569346	0.14696
2000	1055	6.58855	53.8406	0.357668	6.60483	4.18438	0	19.1947	1.57393	3.46674	9.79525	0.268213	0.561857	0.151779
2000	1050	6.38863	54.1096	0.309748	6.40176	4.23227	0	19.1622	1.48674	3.34928	9.96468	0.272024	0.555141	0.156528
2000	1045	6.20284	54.378	0.266176	6.20408	4.27836	0	19.1143	1.40466	3.23813	10.1304	0.275535	0.549115	0.161216
2000	1040	6.02946	54.6491	0.22657	6.01205	4.32231	0	19.0485	1.32722	3.13274	10.2932	0.278779	0.543709	0.165852
2000	1035	5.86697	54.9262	0.190608	5.8259	4.36369	0	18.9618	1.25398	3.03262	10.454	0.281791	0.538862	0.170446
2000	1030	5.71402	55.2139	0.158026	5.64595	4.40192	0	18.8504	1.18459	2.93733	10.6138	0.284615	0.534519	0.175008
2000	1025	5.56934	55.5176	0.128612	5.4726	4.4362	0	18.7087	1.1187	2.84646	10.7737	0.287299	0.530629	0.179554
2000	1020	5.43168	55.8445	0.102211	5.30636	4.46539	0	18.5295	1.05603	2.75959	10.9353	0.289906	0.527143	0.184105
2000	1015	5.29974	56.2048	0.0787359	5.14791	4.48784	0	18.3023	0.996308	2.67633	11.1006	0.292518	0.524016	0.188688
2000	1010	5.1721	56.6128	0.0581823	4.99823	4.50109	0	18.012	0.939301	2.59624	11.2724	0.295241	0.521199	0.193345
2000	1005	5.0439	57.1063	0.0412875	4.85772	4.50076	0	17.6172	0.873882	2.52878	11.4592	0.298272	0.518358	0.198259
2000	1000	4.91756	57.6783	0.027417	4.72803	4.48448	0	17.126	0.811523	2.46372	11.6597	0.3017	0.515787	0.203353
2000	995	4.79206	58.3505	0.0167559	4.60966	4.4468	0	16.5177	0.754051	2.39924	11.8774	0.305652	0.513546	0.208679
2000	990	4.66711	59.1288	0.00938276	4.50121	4.3843	0	15.7898	0.702219	2.33505	12.1131	0.310163	0.511716	0.214266
2000	985	4.54438	59.9864	0.00489515	4.39859	4.299	0	14.9761	0.656478	2.27164	12.3614	0.315063	0.510415	0.220052
2000	980	4.42632	60.8688	0.00247484	4.29641	4.19945	0	14.1379	0.613572	2.21309	12.6127	0.320036	0.50965	0.225921
2000	975	4.31517	61.7321	0.00124745	4.19181	4.09352	0	13.3239	0.573031	2.15995	12.8584	0.324834	0.509423	0.231741
2000	970	4.21186	62.5559	0.000634406	4.08437	3.98562	0	12.5564	0.53586	2.11061	13.0941	0.329342	0.509718	0.237425
2000	965	4.11628	63.3328	0.000327718	3.97457	3.87832	0	11.8425	0.501791	2.06456	13.3182	0.333527	0.510474	0.242938
2000	960	4.02791	64.0624	0.000172393	3.86324	3.77283	0	11.1816	0.470472	2.0214	13.5307	0.337393	0.511635	0.248268
2000	955	3.95111	64.7223	0	3.74765	3.67249	0	10.583	0.450233	2.00018	13.7165	0.340541	0.514112	0.253093
2000	950	3.87579	65.3674	0	3.63548	3.57154	0	10.0138	0.423016	1.96388	13.907	0.343826	0.515992	0.258012
2000	945	3.80585	65.9735	0	3.52391	3.47345	0	9.48628	0.397696	1.92966	14.0877	0.346853	0.518169	0.262753
2000	940	3.74076	66.544	0	3.41343	3.37815	0	8.99595	0.374055	1.89736	14.2594	0.349645	0.520624	0.267326
2000	935	3.68005	67.082	0	3.30444	3.28556	0	8.53911	0.351912	1.86687	14.4228	0.352222	0.523345	0.271735
2000	930	3.62334	67.59	0	3.19724	3.19562	0	8.11255	0.33112	1.83807	14.5785	0.3546	0.526322	0.275988
2000	925	3.57027	68.0704	0	3.09206	3.10828	0	7.71351	0.311552	1.81088	14.7268	0.356795	0.529552	0.280091
2000	920	3.52054	68.5252	0	2.9891	3.02346	0	7.33955	0.293101	1.7852	14.8684	0.358819	0.533034	0.284048
2000	915	3.47386	68.9562	0	2.8885	2.94111	0	6.98853	0.275676	1.76097	15.0036	0.360685	0.536769	0.287864
2000	910	3.43001	69.365	0	2.79036	2.86117	0	6.65857	0.259199	1.73813	15.1328	0.362404	0.540761	0.291544
2000	905	3.38876	69.7531	0	2.69477	2.78356	0	6.34796	0.2436	1.71663	15.2563	0.363985	0.545016	0.295093
2000	900	3.34992	70.1216	0	2.60177	2.70824	0	6.05522	0.228819	1.69642	15.3744	0.365438	0.54954	0.298515
Title:	Allan	et	al.	1989	(see	Ghiorso	1997)
liquid_0	thermodynamic	data	and	composition:
Pressure	Temperature	mass	S	H	V	Cp	viscosity	SiO2	TiO2	Al2O3	Fe2O3	Cr2O3	FeO	MgO	CaO	Na2O	K2O	P2O5	H2O	Mg#
2000	1400	100.201	286.914	-1.20838e+06	37.4021	152.832	1.488	48.5824	1.00798	17.6046	1.29477	0.0299399	7.20896	9.08176	12.425	2.64469	0.0299399	0.0798397	0.00997996	69.2
2000	1400	100.201	286.914	-1.20838e+06	37.4021	152.832	1.488	48.5824	1.00798	17.6046	1.29477	0.0299399	7.20896	9.08176	12.425	2.64469	0.0299399	0.0798397	0.00997996	69.2
2000	1395	100.201	286.457	-1.20915e+06	37.3896	152.832	1.505	48.5824	1.00798	17.6046	1.29554	0.0299399	7.20827	9.08176	12.425	2.64469	0.0299399	0.0798396	0.00997995	69.2
2000	1390	100.201	285.998	-1.20991e+06	37.3771	152.832	1.522	48.5824	1.00797	17.6046	1.29634	0.0299398	7.20754	9.08175	12.425	2.64469	0.0299398	0.0798395	0.00997994	69.2
2000	1385	100.201	285.538	-1.21068e+06	37.3646	152.833	1.54	48.5823	1.00797	17.6046	1.29718	0.0299398	7.20678	9.08174	12.425	2.64468	0.0299398	0.0798395	0.00997993	69.2
2000	1380	100.201	285.077	-1.21144e+06	37.3521	152.833	1.557	48.5823	1.00797	17.6046	1.29806	0.0299398	7.20598	9.08173	12.425	2.64468	0.0299398	0.0798394	0.00997993	69.2
2000	1375	100.201	284.614	-1.21221e+06	37.3397	152.834	1.575	48.5822	1.00797	17.6046	1.29898	0.0299397	7.20514	9.08172	12.425	2.64468	0.0299397	0.0798393	0.00997992	69.2
2000	1370	100.201	284.15	-1.21297e+06	37.3272	152.834	1.592	48.5822	1.00797	17.6046	1.29994	0.0299397	7.20427	9.08172	12.425	2.64468	0.0299397	0.0798393	0.00997991	69.2
2000	1365	100.201	283.685	-1.21374e+06	37.3147	152.835	1.61	48.5821	1.00797	17.6045	1.30095	0.0299397	7.20336	9.08171	12.425	2.64467	0.0299397	0.0798392	0.0099799	69.2
2000	1360	100.202	283.218	-1.21451e+06	37.3023	152.835	1.628	48.5821	1.00797	17.6045	1.30199	0.0299397	7.20241	9.0817	12.425	2.64467	0.0299397	0.0798391	0.00997989	69.2
2000	1355	100.202	282.749	-1.21527e+06	37.2898	152.836	1.646	48.582	1.00797	17.6045	1.30308	0.0299396	7.20142	9.08169	12.4249	2.64467	0.0299396	0.079839	0.00997988	69.2
2000	1350	100.202	282.28	-1.21604e+06	37.2774	152.836	1.664	48.582	1.00797	17.6045	1.30421	0.0299396	7.20039	9.08168	12.4249	2.64466	0.0299396	0.0798389	0.00997986	69.2
2000	1345	100.202	281.808	-1.2168e+06	37.2649	152.837	1.682	48.5819	1.00797	17.6045	1.30538	0.0299396	7.19933	9.08167	12.4249	2.64466	0.0299396	0.0798388	0.00997985	69.2
2000	1340	100.202	281.336	-1.21757e+06	37.2525	152.838	1.7	48.5819	1.00796	17.6044	1.3066	0.0299395	7.19822	9.08166	12.4249	2.64466	0.0299395	0.0798387	0.00997984	69.2
2000	1335	100.202	280.861	-1.21833e+06	37.24	152.838	1.718	48.5818	1.00796	17.6044	1.30787	0.0299395	7.19707	9.08164	12.4249	2.64465	0.0299395	0.0798386	0.00997983	69.2
2000	1330	100.202	280.386	-1.2191e+06	37.2276	152.839	1.737	48.5817	1.00796	17.6044	1.30918	0.0299394	7.19588	9.08163	12.4249	2.64465	0.0299394	0.0798385	0.00997981	69.2
2000	1325	100.202	279.909	-1.21987e+06	37.2152	152.839	1.756	48.5817	1.00796	17.6044	1.31053	0.0299394	7.19465	9.08162	12.4249	2.64465	0.0299394	0.0798384	0.0099798	69.2
2000	1320	100.203	279.43	-1.22063e+06	37.2027	152.84	1.774	48.5816	1.00796	17.6043	1.31194	0.0299394	7.19338	9.08161	12.4248	2.64464	0.0299394	0.0798383	0.00997979	69.2
2000	1315	100.203	278.95	-1.2214e+06	37.1903	152.841	1.793	48.5815	1.00796	17.6043	1.31339	0.0299393	7.19206	9.08159	12.4248	2.64464	0.0299393	0.0798382	0.00997977	69.2
2000	1310	100.203	278.468	-1.22217e+06	37.1779	152.842	1.812	48.5815	1.00796	17.6043	1.31488	0.0299393	7.1907	9.08158	12.4248	2.64464	0.0299393	0.0798381	0.00997976	69.2
2000	1305	100.203	277.985	-1.22293e+06	37.1655	152.842	1.831	48.5814	1.00795	17.6043	1.31643	0.0299392	7.1893	9.08157	12.4248	2.64463	0.0299392	0.0798379	0.00997974	69.2
2000	1300	100.203	277.501	-1.2237e+06	37.153	152.843	1.85	48.5813	1.00795	17.6042	1.31803	0.0299392	7.18784	9.08155	12.4248	2.64463	0.0299392	0.0798378	0.00997973	69.2
2000	1295	100.203	277.014	-1.22446e+06	37.1406	152.844	1.87	48.5812	1.00795	17.6042	1.31967	0.0299391	7.18635	9.08154	12.4247	2.64462	0.0299391	0.0798377	0.00997971	69.2
2000	1290	100.203	276.527	-1.22523e+06	37.1282	152.845	1.889	48.5811	1.00795	17.6042	1.32137	0.0299391	7.18481	9.08152	12.4247	2.64462	0.0299391	0.0798375	0.00997969	69.2
2000	1285	100.204	276.037	-1.226e+06	37.1158	152.846	1.909	48.5811	1.00795	17.6041	1.32312	0.029939	7.18322	9.0815	12.4247	2.64461	0.029939	0.0798374	0.00997967	69.2
2000	1280	100.204	275.547	-1.22676e+06	37.1034	152.847	1.928	48.581	1.00795	17.6041	1.32493	0.029939	7.18158	9.08149	12.4247	2.64461	0.029939	0.0798373	0.00997966	69.3
2000	1275	100.204	275.054	-1.22753e+06	37.091	152.848	1.948	48.5809	1.00794	17.6041	1.32678	0.0299389	7.17989	9.08147	12.4246	2.6446	0.0299389	0.0798371	0.00997964	69.3
2000	1270	100.204	274.56	-1.2283e+06	37.0786	152.849	1.968	48.5808	1.00794	17.604	1.32869	0.0299389	7.17816	9.08145	12.4246	2.6446	0.0299389	0.079837	0.00997962	69.3
2000	1265	100.204	274.065	-1.22907e+06	37.0663	152.85	1.988	48.5807	1.00794	17.604	1.33066	0.0299388	7.17637	9.08144	12.4246	2.64459	0.0299388	0.0798368	0.0099796	69.3
2000	1260	100.205	273.567	-1.22983e+06	37.0539	152.851	2.008	48.5806	1.00794	17.604	1.33268	0.0299387	7.17454	9.08142	12.4246	2.64459	0.0299387	0.0798366	0.00997958	69.3
2000	1255	100.205	273.068	-1.2306e+06	37.0415	152.852	2.029	48.5805	1.00794	17.6039	1.33476	0.0299387	7.17265	9.0814	12.4246	2.64458	0.0299387	0.0798365	0.00997956	69.3
2000	1250	100.205	272.568	-1.23137e+06	37.0291	152.853	2.049	48.5804	1.00793	17.6039	1.33689	0.0299386	7.17071	9.08138	12.4245	2.64458	0.0299386	0.0798363	0.00997954	69.3
2000	1245	99.5756	270.361	-1.22373e+06	36.7727	151.903	2.063	48.584	1.01431	17.5039	1.34718	0.0301279	7.21439	9.13879	12.3996	2.64724	0.0301042	0.080341	0.0100426	69.3
2000	1240	97.2289	263.517	-1.19317e+06	35.8505	148.363	2.058	48.5936	1.03879	17.123	1.38052	0.030855	7.38777	9.35936	12.3074	2.65547	0.0307336	0.0822801	0.010285	69.3
2000	1235	94.9858	256.969	-1.16396e+06	34.9681	144.981	2.053	48.5988	1.06332	16.7442	1.41399	0.0315837	7.56145	9.58038	12.2185	2.66168	0.0313571	0.0842231	0.0105279	69.3
2000	1230	88.093	237.8	-1.07504e+06	32.3851	134.083	2.077	48.772	1.14652	16.1562	1.49115	0.0340549	7.90733	9.38069	12.2516	2.72475	0.0335275	0.0908131	0.0113516	67.9
2000	1225	78.4651	211.439	-951818	28.7895	118.977	2.094	48.7801	1.27346	15.8078	1.58987	0.0382336	8.48212	9.08377	11.9182	2.87443	0.0372638	0.101956	0.0127445	65.6
2000	1220	69.5996	187.236	-838666	25.4797	105.106	2.108	48.7188	1.41659	15.5311	1.6941	0.0421968	9.13282	8.7628	11.4847	3.04601	0.0415772	0.114943	0.0143679	63.1
2000	1215	62.4402	167.687	-747458	22.8056	93.9245	2.119	48.6432	1.5597	15.2505	1.79514	0.0414501	9.77319	8.46053	11.0796	3.20661	0.0458839	0.128123	0.0160153	60.6
2000	1210	56.5492	151.594	-672507	20.6033	84.7415	2.126	48.547	1.70301	14.9654	1.89372	0.040487	10.4071	8.17701	10.7009	3.35608	0.0501717	0.14147	0.0176837	58.3
2000	1205	51.611	138.102	-609754	18.7553	75.4423	2.131	48.4302	1.84687	14.6752	1.99035	0.0392952	11.0369	7.91067	10.3464	3.49532	0.0544439	0.155006	0.0193757	56.1
2000	1200	47.4046	126.609	-556357	17.1795	69.0386	2.132	48.2925	1.99173	14.3794	2.08552	0.0378566	11.6651	7.6602	10.0139	3.62515	0.0587059	0.16876	0.021095	53.9
2000	1195	43.7716	116.681	-510293	15.8169	63.5219	2.13	48.1333	2.13804	14.0777	2.17967	0.0361454	12.2941	7.42459	9.7016	3.74629	0.0629629	0.182767	0.0228459	51.8
2000	1190	40.5944	107.998	-470053	14.6239	58.7104	2.124	47.9506	2.28633	13.7698	2.27324	0.0341268	12.9263	7.20307	9.40816	3.85951	0.0672222	0.197071	0.0246339	49.8
2000	1185	37.54	99.6773	-431392	13.4717	54.1288	2.1	47.6248	2.45159	13.445	2.37746	0.031459	13.607	7.00633	9.1625	3.98227	0.0719137	0.213106	0.0266382	47.8
2000	1180	34.8374	92.3151	-397218	12.4513	50.0833	2.073	47.2763	2.62051	13.1055	2.48315	0.0284843	14.2971	6.81487	8.94078	4.09838	0.0766325	0.229638	0.0287048	45.9
2000	1175	32.4676	85.8576	-367285	11.5559	46.5429	2.044	46.9149	2.78907	12.7615	2.58793	0.025034	14.9905	6.63677	8.72887	4.2069	0.0812964	0.246399	0.0307999	44.1
2000	1170	30.3677	80.1344	-340797	10.762	43.4119	2.012	46.5418	2.9569	12.4128	2.6919	0.0209892	15.6882	6.47073	8.52583	4.30854	0.08591	0.263438	0.0329297	42.4
2000	1165	28.4872	75.0091	-317120	10.051	40.6136	1.979	46.1593	3.12308	12.0593	2.79515	0.0162831	16.3904	6.31526	8.3306	4.40421	0.0904833	0.280828	0.0351035	40.7
2000	1160	26.784	70.3685	-295735	9.40752	38.0845	1.944	45.7708	3.28589	11.7011	2.8977	0.0110646	17.0968	6.1686	8.14189	4.49511	0.0950354	0.298686	0.0373357	39.1
2000	1155	25.2211	66.1135	-276195	8.81825	35.7689	1.908	45.3819	3.44224	11.3389	2.99948	0.00587303	17.8057	6.02843	7.95797	4.58308	0.0996012	0.317194	0.0396493	37.6
2000	1150	23.7555	62.1305	-258009	8.26844	33.6027	1.874	45.0062	3.5849	10.9743	3.10024	0.00172405	18.5119	5.88996	7.77555	4.67211	0.104275	0.336764	0.0420955	36.2
2000	1145	22.0718	57.6129	-238007	7.65967	31.127	1.861	44.829	3.6286	10.632	3.19537	2.32209e-05	19.1305	5.69397	7.5593	4.8131	0.110445	0.362453	0.0453067	34.7
2000	1140	18.9362	49.4314	-204305	6.6169	26.5637	1.984	45.8516	3.14664	10.4604	3.25327	0	19.1183	5.14982	7.13559	5.28336	0.125777	0.42247	0.0528088	32.4
2000	1135	16.5439	43.1866	-178708	5.82074	23.098	2.102	46.85	2.69603	10.2798	3.30655	0	19.0343	4.65877	6.74715	5.74259	0.140851	0.483561	0.0604452	30.4
2000	1130	14.7975	38.6154	-159946	5.23508	20.5772	2.198	47.6702	2.33543	10.0687	3.36188	0	18.983	4.25443	6.41811	6.14572	0.154338	0.540631	0.0675788	28.5
2000	1125	13.4612	35.1084	-145533	4.78375	18.6544	2.278	48.3544	2.04156	9.8379	3.41879	0	18.9579	3.91458	6.1359	6.50385	0.16648	0.594299	0.0742873	26.9
2000	1120	12.3997	32.3154	-134046	4.42292	17.1313	2.345	48.9362	1.79715	9.59563	3.47668	0	18.951	3.62317	5.89045	6.82638	0.177496	0.645178	0.0806473	25.4
2000	1115	11.5313	30.0255	-124624	4.12613	15.8886	2.403	49.4397	1.59022	9.34731	3.53509	0	18.9559	3.36903	5.67434	7.12043	0.187557	0.693763	0.0867204	24.1
2000	1110	10.7841	28.0543	-116502	3.86976	14.8194	2.457	49.9232	1.40838	9.10242	3.59275	0	18.9736	3.13738	5.45177	7.40292	0.197126	0.717761	0.0927291	22.8
2000	1105	10.1136	26.288	-109205	3.63915	13.8572	2.515	50.4363	1.24392	8.86729	3.64861	0	19.0092	2.91817	5.18904	7.68803	0.206588	0.694051	0.0988771	21.5
2000	1100	9.54269	24.7809	-102982	3.44194	13.0401	2.566	50.8943	1.10174	8.62977	3.70466	0	19.0476	2.7233	4.95224	7.95201	0.215245	0.674363	0.104792	20.3
2000	1095	9.04696	23.4698	-97572.3	3.27007	12.3321	2.612	51.3142	0.977039	8.39273	3.7605	0	19.0868	2.5475	4.73284	8.19999	0.223236	0.6547	0.110534	19.2
2000	1090	8.61269	22.3192	-92831.6	3.11902	11.7133	2.654	51.699	0.867022	8.15698	3.81605	0	19.1237	2.3882	4.53154	8.43324	0.230591	0.637537	0.116108	18.2
2000	1085	8.22818	21.2987	-88634.7	2.98492	11.1667	2.693	52.0553	0.769246	7.9236	3.87115	0	19.1567	2.24284	4.34583	8.65393	0.237368	0.622504	0.121534	17.3
2000	1080	7.88463	20.3853	-84887.3	2.86484	10.6793	2.729	52.3885	0.681831	7.69333	3.92564	0	19.1841	2.10939	4.17365	8.86382	0.243616	0.609249	0.126829	16.4
2000	1075	7.57527	19.5617	-81516.9	2.75652	10.2414	2.763	52.7029	0.603305	7.46677	3.9794	0	19.2048	1.98625	4.01334	9.06436	0.249376	0.597498	0.132008	15.6
2000	1070	7.29482	18.8139	-78466.7	2.65821	9.84526	2.795	53.0022	0.532494	7.24432	4.0323	0	19.2174	1.87211	3.86354	9.25678	0.254684	0.58704	0.137084	14.8
2000	1065	7.03906	18.1311	-75691.5	2.56847	9.48473	2.826	53.2897	0.468448	7.02634	4.0842	0	19.2208	1.76592	3.72311	9.44212	0.259573	0.577702	0.142064	14.1
2000	1060	6.80458	17.5044	-73154.7	2.48618	9.15486	2.856	53.5682	0.410388	6.8131	4.13495	0	19.2137	1.66677	3.59112	9.62133	0.264073	0.569346	0.14696	13.4
2000	1055	6.58855	16.9263	-70826.4	2.41039	8.85159	2.885	53.8406	0.357668	6.60483	4.18438	0	19.1947	1.57393	3.46674	9.79525	0.268213	0.561857	0.151779	12.8
2000	1050	6.38863	16.3909	-68681.6	2.34032	8.57153	2.914	54.1096	0.309748	6.40176	4.23227	0	19.1622	1.48674	3.34928	9.96468	0.272024	0.555141	0.156528	12.2
2000	1045	6.20284	15.893	-66699.6	2.27532	8.31181	2.944	54.378	0.266176	6.20408	4.27836	0	19.1143	1.40466	3.23813	10.1304	0.275535	0.549115	0.161216	11.6
2000	1040	6.02946	15.428	-64862.8	2.21481	8.06997	2.973	54.6491	0.22657	6.01205	4.32231	0	19.0485	1.32722	3.13274	10.2932	0.278779	0.543709	0.165852	11
2000	1035	5.86697	14.9922	-63156.3	2.15832	7.84387	3.004	54.9262	0.190608	5.8259	4.36369	0	18.9618	1.25398	3.03262	10.454	0.281791	0.538862	0.170446	10.5
2000	1030	5.71402	14.5821	-61567	2.10543	7.63158	3.036	55.2139	0.158026	5.64595	4.40192	0	18.8504	1.18459	2.93733	10.6138	0.284615	0.534519	0.175008	10.1
2000	1025	5.56934	14.1944	-60083.9	2.05574	7.43133	3.07	55.5176	0.128612	5.4726	4.4362	0	18.7087	1.1187	2.84646	10.7737	0.287299	0.530629	0.179554	9.6
2000	1020	5.43168	13.826	-58697.2	2.00893	7.24138	3.107	55.8445	0.102211	5.30636	4.46539	0	18.5295	1.05603	2.75959	10.9353	0.289906	0.527143	0.184105	9.2
2000	1015	5.29974	13.4738	-57397.9	1.96465	7.06	3.148	56.2048	0.0787359	5.14791	4.48784	0	18.3023	0.996308	2.67633	11.1006	0.292518	0.524016	0.188688	8.8
2000	1010	5.1721	13.1344	-56178.2	1.92257	6.88528	3.194	56.6128	0.0581823	4.99823	4.50109	0	18.012	0.939301	2.59624	11.2724	0.295241	0.521199	0.193345	8.5
2000	1005	5.0439	12.7963	-55005	1.88146	6.71054	3.25	57.1063	0.0412875	4.85772	4.50076	0	17.6172	0.873882	2.52878	11.4592	0.298272	0.518358	0.198259	8.1
2000	1000	4.91756	12.4653	-53898.6	1.84199	6.53932	3.315	57.6783	0.027417	4.72803	4.48448	0	17.126	0.811523	2.46372	11.6597	0.3017	0.515787	0.203353	7.8
2000	995	4.79206	12.1391	-52856.9	1.80401	6.37031	3.391	58.3505	0.0167559	4.60966	4.4468	0	16.5177	0.754051	2.39924	11.8774	0.305652	0.513546	0.208679	7.5
2000	990	4.66711	11.8169	-51874.3	1.76735	6.20305	3.478	59.1288	0.00938276	4.50121	4.3843	0	15.7898	0.702219	2.33505	12.1131	0.310163	0.511716	0.214266	7.3
2000	985	4.54438	11.502	-50946.6	1.73212	6.03945	3.572	59.9864	0.00489515	4.39859	4.299	0	14.9761	0.656478	2.27164	12.3614	0.315063	0.510415	0.220052	7.2
2000	980	4.42632	11.1995	-50065.3	1.69843	5.88228	3.669	60.8688	0.00247484	4.29641	4.19945	0	14.1379	0.613572	2.21309	12.6127	0.320036	0.50965	0.225921	7.2
2000	975	4.31517	10.9139	-49230.5	1.66652	5.73423	3.763	61.7321	0.00124745	4.19181	4.09352	0	13.3239	0.573031	2.15995	12.8584	0.324834	0.509423	0.231741	7.1
2000	970	4.21186	10.6473	-48444.6	1.63657	5.59647	3.851	62.5559	0.000634406	4.08437	3.98562	0	12.5564	0.53586	2.11061	13.0941	0.329342	0.509718	0.237425	7.1
2000	965	4.11628	10.3994	-47705.7	1.60854	5.46881	3.934	63.3328	0.000327718	3.97457	3.87832	0	11.8425	0.501791	2.06456	13.3182	0.333527	0.510474	0.242938	7
2000	960	4.02791	10.1688	-47011.2	1.5823	5.35056	4.011	64.0624	0.000172393	3.86324	3.77283	0	11.1816	0.470472	2.0214	13.5307	0.337393	0.511635	0.248268	7
2000	955	3.95111	9.96608	-46411.1	1.55939	5.24807	4.082	64.7223	0	3.74765	3.67249	0	10.583	0.450233	2.00018	13.7165	0.340541	0.514112	0.253093	7
2000	950	3.87579	9.76711	-45805.1	1.5366	5.14694	4.149	65.3674	0	3.63548	3.57154	0	10.0138	0.423016	1.96388	13.907	0.343826	0.515992	0.258012	7
2000	945	3.80585	9.58118	-45235	1.51523	5.05286	4.212	65.9735	0	3.52391	3.47345	0	9.48628	0.397696	1.92966	14.0877	0.346853	0.518169	0.262753	7
2000	940	3.74076	9.40703	-44698	1.49515	4.96516	4.272	66.544	0	3.41343	3.37815	0	8.99595	0.374055	1.89736	14.2594	0.349645	0.520624	0.267326	6.9
2000	935	3.68005	9.24357	-44192	1.47625	4.88325	4.327	67.082	0	3.30444	3.28556	0	8.53911	0.351912	1.86687	14.4228	0.352222	0.523345	0.271735	6.8
2000	930	3.62334	9.08984	-43714.8	1.45845	4.8066	4.38	67.59	0	3.19724	3.19562	0	8.11255	0.33112	1.83807	14.5785	0.3546	0.526322	0.275988	6.8
2000	925	3.57027	8.94501	-43264.4	1.44167	4.73477	4.43	68.0704	0	3.09206	3.10828	0	7.71351	0.311552	1.81088	14.7268	0.356795	0.529552	0.280091	6.7
2000	920	3.52054	8.80834	-42839.2	1.42582	4.66734	4.477	68.5252	0	2.9891	3.02346	0	7.33955	0.293101	1.7852	14.8684	0.358819	0.533034	0.284048	6.6
2000	915	3.47386	8.67917	-42437.6	1.41086	4.60397	4.522	68.9562	0	2.8885	2.94111	0	6.98853	0.275676	1.76097	15.0036	0.360685	0.536769	0.287864	6.6
2000	910	3.43001	8.5569	-42057.9	1.3967	4.54434	4.564	69.365	0	2.79036	2.86117	0	6.65857	0.259199	1.73813	15.1328	0.362404	0.540761	0.291544	6.5
2000	905	3.38876	8.44102	-41699	1.38331	4.48818	4.605	69.7531	0	2.69477	2.78356	0	6.34796	0.2436	1.71663	15.2563	0.363985	0.545016	0.295093	6.4
2000	900	3.34992	8.33104	-41359.6	1.37062	4.43521	4.645	70.1216	0	2.60177	2.70824	0	6.05522	0.228819	1.69642	15.3744	0.365438	0.54954	0.298515	6.3
olivine_0	thermodynamic	data	and	composition:
Pressure	Temperature	mass	S	H	V	Cp	formula	SiO2	TiO2	Al2O3	Fe2O3	Cr2O3	FeO	MgO	CaO	Na2O	K2O	P2O5	H2O
2000	1230	1.81839	4.47086	-22645.6	0.561508	2.28928	(Ca0.01Mg0.86Fe''0.14Mn0.00Co0.00Ni0.00)2SiO4	40.1393	0	0	0	0	13.3657	45.9894	0.505587	0	0	0	0
2000	1225	1.24748	3.05892	-15447.5	0.384042	1.56556	(Ca0.01Mg0.85Fe''0.15Mn0.00Co0.00Ni0.00)2SiO4	40.0107	0	0	0	0	14.0553	45.4345	0.499522	0	0	0	0
2000	1220	0.913041	2.23257	-11235.1	0.280148	1.14195	(Ca0.01Mg0.84Fe''0.16Mn0.00Co0.00Ni0.00)2SiO4	39.8704	0	0	0	0	14.811	44.8302	0.48833	0	0	0	0
2000	1215	0.719698	1.75483	-8800.62	0.220096	0.897083	(Ca0.01Mg0.84Fe''0.16Mn0.00Co0.00Ni0.00)2SiO4	39.7316	0	0	0	0	15.5578	44.2328	0.477699	0	0	0	0
2000	1210	0.582415	1.41607	-7077.61	0.177529	0.723521	(Ca0.01Mg0.83Fe''0.17Mn0.00Co0.00Ni0.00)2SiO4	39.5944	0	0	0	0	16.2966	43.6414	0.467645	0	0	0	0
2000	1205	0.478274	1.15955	-5775.98	0.14531	0.592155	(Ca0.01Mg0.82Fe''0.18Mn0.00Co0.00Ni0.00)2SiO4	39.4581	0	0	0	0	17.0295	43.0543	0.458119	0	0	0	0
2000	1200	0.396719	0.959061	-4761.3	0.12014	0.489535	(Ca0.01Mg0.81Fe''0.19Mn0.00Co0.00Ni0.00)2SiO4	39.3225	0	0	0	0	17.7586	42.4699	0.449077	0	0	0	0
2000	1195	0.330417	0.796468	-3940.86	0.099737	0.406354	(Ca0.01Mg0.80Fe''0.20Mn0.00Co0.00Ni0.00)2SiO4	39.1873	0	0	0	0	18.4848	41.8873	0.440489	0	0	0	0
2000	1190	0.2737	0.657834	-3244.01	0.082349	0.335474	(Ca0.01Mg0.79Fe''0.21Mn0.00Co0.00Ni0.00)2SiO4	39.0526	0	0	0	0	19.2087	41.3064	0.432341	0	0	0	0
2000	1005	0.010669	0.022306	-89.9968	0.002754	0.011153	(Ca0.01Mg0.34Fe''0.66Mn0.00Co0.00Ni0.00)2SiO4	32.9577	0	0	0	0	51.7348	14.9029	0.404589	0	0	0	0
2000	1000	0.009493	0.01977	-79.4536	0.002442	0.009889	(Ca0.01Mg0.33Fe''0.67Mn0.00Co0.00Ni0.00)2SiO4	32.8392	0	0	0	0	52.3674	14.3898	0.403604	0	0	0	0
2000	995	0.006665	0.013832	-55.4207	0.00171	0.006922	(Ca0.01Mg0.32Fe''0.68Mn0.00Co0.00Ni0.00)2SiO4	32.7376	0	0	0	0	52.9105	13.9504	0.401452	0	0	0	0
2000	990	0.003464	0.007166	-28.6559	0.000887	0.003589	(Ca0.01Mg0.32Fe''0.68Mn0.00Co0.00Ni0.00)2SiO4	32.6565	0	0	0	0	53.3459	13.5998	0.397857	0	0	0	0
2000	985	0.000569	0.001173	-4.68825	0.000145	0.000588	(Ca0.01Mg0.31Fe''0.69Mn0.00Co0.00Ni0.00)2SiO4	32.5955	0	0	0	0	53.6743	13.3374	0.392818	0	0	0	0
clinopyroxene_0	thermodynamic	data	and	composition:
Pressure	Temperature	mass	S	H	V	Cp	structure	formula	SiO2	TiO2	Al2O3	Fe2O3	Cr2O3	FeO	MgO	CaO	Na2O	K2O	P2O5	H2O
2000	1225	3.2719	7.80135	-42092.9	1.01959	3.93391	cpx	Na0.01Ca0.77Fe''0.15Mg0.95Fe'''0.04Ti0.01Al0.21Si1.88O6	51.5062	0.329407	4.85595	1.29574	0	4.78094	17.4154	19.6161	0.200241	0	0	0
2000	1220	3.56318	8.48496	-45726.1	1.10873	4.28065	cpx	Na0.01Ca0.75Fe''0.16Mg0.95Fe'''0.04Ti0.01Al0.21Si1.87O6	51.4276	0.371883	4.83234	1.34343	0	5.10657	17.3891	19.3189	0.210172	0	0	0
2000	1215	2.85654	6.79354	-36565.3	0.887538	3.42901	cpx	Na0.02Ca0.74Fe''0.17Mg0.94Fe'''0.04Ti0.01Al0.21Si1.87O6	51.3503	0.414377	4.80847	1.38858	0	5.43976	17.3695	19.0093	0.219731	0	0	0
2000	1210	2.32397	5.51994	-29671.9	0.720996	2.78758	cpx	Na0.02Ca0.73Fe''0.18Mg0.95Fe'''0.04Ti0.01Al0.21Si1.87O6	51.2749	0.456419	4.78405	1.43135	0	5.78168	17.3568	18.6859	0.228915	0	0	0
2000	1205	1.92705	4.57142	-24539.3	0.596956	2.30979	cpx	Na0.02Ca0.72Fe''0.19Mg0.95Fe'''0.04Ti0.01Al0.21Si1.87O6	51.2026	0.497417	4.7578	1.47156	0	6.13628	17.3542	18.3424	0.237672	0	0	0
2000	1200	1.62547	3.85132	-20642.5	0.502769	1.947	cpx	Na0.02Ca0.70Fe''0.20Mg0.95Fe'''0.04Ti0.01Al0.20Si1.87O6	51.1357	0.536501	4.728	1.50877	0	6.50939	17.3669	17.9689	0.245882	0	0	0
2000	1195	1.39315	3.29712	-17641.2	0.430245	1.66777	cpx	Na0.02Ca0.69Fe''0.21Mg0.95Fe'''0.04Ti0.02Al0.20Si1.87O6	51.0775	0.572293	4.69215	1.54208	0	6.91051	17.4036	17.5486	0.253305	0	0	0
2000	1190	1.21429	2.87096	-15328.3	0.374412	1.45308	cpx	Na0.02Ca0.67Fe''0.23Mg0.96Fe'''0.04Ti0.02Al0.20Si1.87O6	51.0344	0.602257	4.64574	1.56957	0	7.35842	17.4827	17.0475	0.259419	0	0	0
2000	1185	0.747281	1.7633	-9414.54	0.230077	0.892868	cpx	Na0.02Ca0.67Fe''0.23Mg0.95Fe'''0.04Ti0.02Al0.20Si1.87O6	50.8909	0.665514	4.67636	1.6273	0	7.57306	17.3131	16.9821	0.271659	0	0	0
2000	1180	0.584595	1.37615	-7353.72	0.179733	0.697115	cpx	Na0.02Ca0.67Fe''0.24Mg0.93Fe'''0.05Ti0.02Al0.20Si1.86O6	50.7102	0.744707	4.73003	1.69658	0	7.69728	17.0492	17.0855	0.286511	0	0	0
2000	1175	0.506654	1.18981	-6364.08	0.155551	0.602983	cpx	Na0.02Ca0.68Fe''0.24Mg0.92Fe'''0.05Ti0.02Al0.21Si1.86O6	50.5239	0.830684	4.78629	1.76724	0	7.80743	16.785	17.1974	0.302039	0	0	0
2000	1170	0.445045	1.04261	-5582.53	0.136443	0.528614	cpx	Na0.02Ca0.68Fe''0.24Mg0.91Fe'''0.05Ti0.03Al0.21Si1.86O6	50.3312	0.924103	4.84532	1.8395	0	7.90435	16.5205	17.3167	0.318292	0	0	0
2000	1165	0.397002	0.927787	-4973.35	0.121542	0.470613	cpx	Na0.02Ca0.69Fe''0.25Mg0.89Fe'''0.05Ti0.03Al0.21Si1.85O6	50.1314	1.02556	4.90721	1.91358	0	7.98908	16.2555	17.4423	0.335317	0	0	0
2000	1160	0.360813	0.841142	-4514.3	0.110306	0.426861	cpx	Na0.03Ca0.70Fe''0.25Mg0.88Fe'''0.06Ti0.03Al0.22Si1.85O6	49.924	1.13542	4.97179	1.98961	0	8.06299	15.9901	17.5729	0.353145	0	0	0
2000	1155	0.33593	0.781191	-4197.8	0.102551	0.396626	cpx	Na0.03Ca0.70Fe''0.25Mg0.87Fe'''0.06Ti0.03Al0.22Si1.84O6	49.7094	1.25348	5.0383	2.06764	0	8.12818	15.7246	17.7067	0.371773	0	0	0
2000	1150	0.326771	0.757995	-4078.34	0.099611	0.385037	cpx	Na0.03Ca0.71Fe''0.25Mg0.85Fe'''0.06Ti0.04Al0.22Si1.83O6	49.4909	1.37743	5.10381	2.14723	0	8.18947	15.4601	17.84	0.391098	0	0	0
2000	1145	0.466884	1.08035	-5817.98	0.142121	0.549062	cpx	Na0.03Ca0.71Fe''0.26Mg0.84Fe'''0.06Ti0.04Al0.22Si1.83O6	49.3229	1.46805	5.12617	2.22108	0	8.30555	15.2141	17.933	0.409172	0	0	0
2000	1140	1.21086	2.79586	-15035.7	0.3682	1.4218	cpx	Na0.03Ca0.71Fe''0.27Mg0.84Fe'''0.06Ti0.04Al0.21Si1.84O6	49.4808	1.32237	4.89899	2.24939	0	8.77309	15.0736	17.7863	0.41538	0	0	0
2000	1135	0.886453	2.04237	-10969.3	0.269268	1.03929	cpx	Na0.03Ca0.70Fe''0.29Mg0.83Fe'''0.06Ti0.03Al0.21Si1.85O6	49.6334	1.17809	4.68372	2.27403	0	9.23608	14.9333	17.6402	0.421185	0	0	0
2000	1130	0.602615	1.38534	-7433.49	0.182855	0.705431	cpx	Na0.03Ca0.70Fe''0.30Mg0.82Fe'''0.06Ti0.03Al0.20Si1.85O6	49.75	1.06035	4.50192	2.29959	0	9.65209	14.7853	17.5227	0.428109	0	0	0
2000	1125	0.43013	0.986597	-5290.44	0.130379	0.502742	cpx	Na0.03Ca0.70Fe''0.31Mg0.81Fe'''0.07Ti0.03Al0.19Si1.86O6	49.8422	0.961637	4.34337	2.32535	0	10.0316	14.633	17.4271	0.43587	0	0	0
2000	1120	0.320298	0.733002	-3928.9	0.096986	0.373793	cpx	Na0.03Ca0.69Fe''0.32Mg0.81Fe'''0.07Ti0.02Al0.19Si1.87O6	49.9168	0.87692	4.20182	2.35112	0	10.3826	14.4779	17.3486	0.444266	0	0	0
2000	1115	0.246993	0.563943	-3022	0.074712	0.287802	cpx	Na0.03Ca0.69Fe''0.34Mg0.80Fe'''0.07Ti0.02Al0.18Si1.87O6	49.9781	0.802828	4.07327	2.37689	0	10.7113	14.3208	17.2836	0.453164	0	0	0
2000	1110	0.201416	0.458812	-2458.24	0.060862	0.23433	cpx	Na0.03Ca0.69Fe''0.35Mg0.79Fe'''0.07Ti0.02Al0.17Si1.87O6	50.0292	0.735849	3.95337	2.40361	0	11.0289	14.1594	17.2272	0.462525	0	0	0
2000	1105	0.171595	0.389959	-2089.01	0.051795	0.199316	cpx	Na0.03Ca0.69Fe''0.36Mg0.78Fe'''0.07Ti0.02Al0.17Si1.88O6	50.0717	0.673642	3.83903	2.4322	0	11.3449	13.9908	17.1753	0.472376	0	0	0
2000	1100	0.139162	0.315502	-1690.09	0.04196	0.161385	cpx	Na0.04Ca0.69Fe''0.37Mg0.77Fe'''0.07Ti0.02Al0.17Si1.88O6	50.1066	0.617679	3.73257	2.46079	0	11.646	13.8217	17.1321	0.482582	0	0	0
2000	1095	0.115811	0.261935	-1403.22	0.034882	0.134091	cpx	Na0.04Ca0.69Fe''0.38Mg0.77Fe'''0.07Ti0.02Al0.16Si1.89O6	50.1353	0.566663	3.63251	2.48963	0	11.9358	13.6516	17.0954	0.49312	0	0	0
2000	1090	0.097786	0.220634	-1182.14	0.029422	0.113039	cpx	Na0.04Ca0.69Fe''0.38Mg0.76Fe'''0.07Ti0.01Al0.16Si1.89O6	50.1587	0.519852	3.53808	2.51874	0	12.2156	13.4807	17.0644	0.503964	0	0	0
2000	1085	0.083889	0.188821	-1011.9	0.025214	0.09682	cpx	Na0.04Ca0.69Fe''0.39Mg0.75Fe'''0.07Ti0.01Al0.15Si1.89O6	50.1774	0.47658	3.44854	2.54821	0	12.487	13.3091	17.0381	0.515106	0	0	0
2000	1080	0.072972	0.163848	-878.298	0.02191	0.084085	cpx	Na0.04Ca0.69Fe''0.40Mg0.74Fe'''0.07Ti0.01Al0.15Si1.90O6	50.192	0.436328	3.36331	2.57814	0	12.7514	13.1367	17.0156	0.526543	0	0	0
2000	1075	0.06425	0.143911	-771.669	0.019271	0.073916	cpx	Na0.04Ca0.69Fe''0.41Mg0.73Fe'''0.07Ti0.01Al0.15Si1.90O6	50.203	0.398688	3.2819	2.60861	0	13.0098	12.9636	16.9961	0.538276	0	0	0
2000	1070	0.057181	0.127762	-685.32	0.017133	0.065678	cpx	Na0.04Ca0.69Fe''0.42Mg0.72Fe'''0.08Ti0.01Al0.14Si1.90O6	50.2107	0.363332	3.20395	2.6397	0	13.2632	12.7896	16.9792	0.550312	0	0	0
2000	1065	0.05138	0.114517	-614.515	0.015379	0.05892	cpx	Na0.04Ca0.69Fe''0.43Mg0.71Fe'''0.08Ti0.01Al0.14Si1.90O6	50.2153	0.33	3.12912	2.6715	0	13.5123	12.6148	16.9644	0.562658	0	0	0
2000	1060	0.04657	0.103538	-555.833	0.013924	0.053318	cpx	Na0.04Ca0.69Fe''0.44Mg0.70Fe'''0.08Ti0.01Al0.14Si1.91O6	50.2172	0.298477	3.05716	2.70405	0	13.7575	12.4391	16.9512	0.575327	0	0	0
2000	1055	0.042546	0.094356	-506.764	0.012708	0.048632	cpx	Na0.04Ca0.69Fe''0.44Mg0.69Fe'''0.08Ti0.01Al0.13Si1.91O6	50.2165	0.26859	2.98784	2.73743	0	13.9995	12.2626	16.9392	0.588332	0	0	0
2000	1050	0.039157	0.086622	-465.441	0.011683	0.044685	cpx	Na0.04Ca0.69Fe''0.45Mg0.69Fe'''0.08Ti0.01Al0.13Si1.91O6	50.2135	0.240199	2.92097	2.77167	0	14.2384	12.0853	16.9283	0.601687	0	0	0
2000	1045	0.036288	0.080074	-430.469	0.010816	0.041344	cpx	Na0.05Ca0.69Fe''0.46Mg0.68Fe'''0.08Ti0.01Al0.13Si1.91O6	50.2083	0.213192	2.85636	2.80681	0	14.4745	11.9074	16.918	0.61541	0	0	0
2000	1040	0.033857	0.074518	-400.806	0.01008	0.038511	cpx	Na0.05Ca0.69Fe''0.47Mg0.67Fe'''0.08Ti0.01Al0.13Si1.91O6	50.2011	0.187482	2.79386	2.84285	0	14.7079	11.7289	16.9084	0.629521	0	0	0
2000	1035	0.031799	0.069811	-375.688	0.009458	0.036111	cpx	Na0.05Ca0.69Fe''0.48Mg0.66Fe'''0.08Ti0.00Al0.12Si1.92O6	50.1922	0.163007	2.73332	2.87975	0	14.9382	11.5503	16.8992	0.644039	0	0	0
2000	1030	0.030072	0.065852	-354.578	0.008935	0.034095	cpx	Na0.05Ca0.69Fe''0.48Mg0.65Fe'''0.08Ti0.00Al0.12Si1.92O6	50.182	0.13973	2.67459	2.91742	0	15.165	11.3718	16.8904	0.658985	0	0	0
2000	1025	0.028651	0.062579	-337.153	0.008503	0.03243	cpx	Na0.05Ca0.69Fe''0.49Mg0.64Fe'''0.09Ti0.00Al0.12Si1.92O6	50.1708	0.117646	2.61749	2.95566	0	15.3876	11.1943	16.8821	0.674381	0	0	0
2000	1020	0.027526	0.059967	-323.291	0.008161	0.031107	cpx	Na0.05Ca0.69Fe''0.50Mg0.63Fe'''0.09Ti0.00Al0.12Si1.92O6	50.1594	0.0967902	2.56184	2.99415	0	15.6044	11.0188	16.8744	0.690248	0	0	0
2000	1015	0.026708	0.058037	-313.108	0.007911	0.030135	cpx	Na0.05Ca0.69Fe''0.51Mg0.62Fe'''0.09Ti0.00Al0.11Si1.92O6	50.1487	0.0772546	2.50739	3.03229	0	15.8131	10.8468	16.8678	0.706604	0	0	0
2000	1010	0.026232	0.056856	-306.987	0.007762	0.029552	cpx	Na0.05Ca0.69Fe''0.51Mg0.61Fe'''0.09Ti0.00Al0.11Si1.93O6	50.1402	0.0592191	2.45384	3.06912	0	16.01	10.6812	16.863	0.723459	0	0	0
2000	1005	0.02426	0.05243	-283.589	0.007173	0.027279	cpx	Na0.06Ca0.70Fe''0.52Mg0.60Fe'''0.09Ti0.00Al0.11Si1.93O6	50.1083	0.0448819	2.418	3.14431	0	16.077	10.4316	17.0274	0.748517	0	0	0
2000	1000	0.023385	0.050395	-273.083	0.006909	0.026249	cpx	Na0.06Ca0.71Fe''0.52Mg0.59Fe'''0.09Ti0.00Al0.11Si1.93O6	50.0818	0.0318456	2.38161	3.21637	0	16.136	10.1982	17.1802	0.773964	0	0	0
2000	995	0.023498	0.0505	-274.183	0.006938	0.026334	cpx	Na0.06Ca0.71Fe''0.52Mg0.57Fe'''0.09Ti0.00Al0.11Si1.93O6	50.0691	0.0207367	2.3416	3.27583	0	16.1884	10.001	17.3047	0.798666	0	0	0
2000	990	0.023615	0.050618	-275.423	0.006968	0.02643	cpx	Na0.06Ca0.72Fe''0.52Mg0.57Fe'''0.10Ti0.00Al0.10Si1.93O6	50.075	0.0123357	2.29741	3.31831	0	16.2206	9.84848	17.4056	0.822349	0	0	0
2000	985	0.023232	0.049673	-270.959	0.006853	0.025976	cpx	Na0.06Ca0.72Fe''0.52Mg0.56Fe'''0.10Ti0.00Al0.10Si1.93O6	50.1001	0.00681507	2.24947	3.3427	0	16.2265	9.74149	17.488	0.844836	0	0	0
2000	980	0.021216	0.04525	-247.523	0.006257	0.0237	cpx	Na0.06Ca0.73Fe''0.52Mg0.55Fe'''0.10Ti0.00Al0.10Si1.93O6	50.1292	0.0036612	2.20409	3.36636	0	16.1959	9.64151	17.5909	0.868329	0	0	0
2000	975	0.018855	0.040113	-220.076	0.00556	0.021043	cpx	Na0.07Ca0.73Fe''0.52Mg0.55Fe'''0.10Ti0.00Al0.10Si1.93O6	50.1559	0.00196658	2.1624	3.39413	0	16.1452	9.53693	17.7106	0.892951	0	0	0
2000	970	0.016976	0.036023	-198.228	0.005004	0.018927	cpx	Na0.07Ca0.74Fe''0.52Mg0.54Fe'''0.10Ti0.00Al0.10Si1.94O6	50.1821	0.00106479	2.12249	3.42177	0	16.092	9.43593	17.827	0.917691	0	0	0
2000	965	0.015353	0.032498	-179.361	0.004525	0.017103	cpx	Na0.07Ca0.74Fe''0.52Mg0.54Fe'''0.10Ti0.00Al0.09Si1.94O6	50.2071	0.000584714	2.08419	3.44963	0	16.0424	9.33726	17.9364	0.942438	0	0	0
2000	960	0.013974	0.029505	-163.317	0.004118	0.015553	cpx	Na0.07Ca0.75Fe''0.52Mg0.53Fe'''0.10Ti0.00Al0.09Si1.94O6	50.2304	0.000326441	2.04743	3.47811	0	15.9989	9.23985	18.0378	0.967197	0	0	0
2000	955	0.008273	0.017433	-97.9131	0.002446	0.00924	cpx	Na0.05Ca0.76Fe''0.51Mg0.56Fe'''0.06Ti0.00Al0.12Si1.94O6	50.3925	0	2.56985	2.18399	0	15.9669	9.74104	18.4311	0.71449	0	0	0
2000	950	0.011246	0.023636	-133.237	0.003325	0.012551	cpx	Na0.05Ca0.76Fe''0.51Mg0.55Fe'''0.06Ti0.00Al0.12Si1.94O6	50.4217	0	2.55311	2.14381	0	15.9181	9.67619	18.5671	0.719905	0	0	0
2000	945	0.010392	0.021786	-123.242	0.003073	0.01159	cpx	Na0.05Ca0.77Fe''0.51Mg0.55Fe'''0.06Ti0.00Al0.11Si1.94O6	50.4488	0	2.53659	2.10478	0	15.8781	9.61125	18.6955	0.725015	0	0	0
2000	940	0.009652	0.020183	-114.571	0.002854	0.010757	cpx	Na0.05Ca0.77Fe''0.51Mg0.55Fe'''0.06Ti0.00Al0.11Si1.94O6	50.4737	0	2.52038	2.0669	0	15.8462	9.54576	18.8172	0.72986	0	0	0
2000	935	0.009006	0.018782	-106.982	0.002663	0.010028	cpx	Na0.05Ca0.78Fe''0.51Mg0.54Fe'''0.06Ti0.00Al0.11Si1.94O6	50.4964	0	2.50454	2.03021	0	15.8224	9.47933	18.9327	0.734473	0	0	0
2000	930	0.008436	0.017548	-100.289	0.002494	0.009386	cpx	Na0.06Ca0.78Fe''0.51Mg0.54Fe'''0.06Ti0.00Al0.11Si1.94O6	50.5168	0	2.48911	1.99469	0	15.8063	9.41163	19.0426	0.73888	0	0	0
2000	925	0.007931	0.016454	-94.3447	0.002344	0.008817	cpx	Na0.06Ca0.79Fe''0.51Mg0.54Fe'''0.06Ti0.00Al0.11Si1.94O6	50.535	0	2.47413	1.96035	0	15.7978	9.34234	19.1473	0.743103	0	0	0
2000	920	0.00748	0.015477	-89.0306	0.00221	0.008308	cpx	Na0.06Ca0.79Fe''0.51Mg0.53Fe'''0.06Ti0.00Al0.11Si1.94O6	50.5508	0	2.45962	1.92716	0	15.797	9.27117	19.247	0.747162	0	0	0
2000	915	0.007075	0.0146	-84.2526	0.00209	0.007851	cpx	Na0.06Ca0.80Fe''0.51Mg0.53Fe'''0.05Ti0.00Al0.11Si1.95O6	50.5643	0	2.4456	1.89513	0	15.8039	9.19787	19.3421	0.751074	0	0	0
2000	910	0.006709	0.013808	-79.9339	0.001982	0.007439	cpx	Na0.06Ca0.80Fe''0.51Mg0.52Fe'''0.05Ti0.00Al0.11Si1.95O6	50.5755	0	2.43208	1.86422	0	15.8184	9.12218	19.4328	0.754853	0	0	0
2000	905	0.006378	0.013091	-76.0113	0.001883	0.007065	cpx	Na0.06Ca0.80Fe''0.51Mg0.52Fe'''0.05Ti0.00Al0.11Si1.95O6	50.5842	0	2.41907	1.83442	0	15.8408	9.04386	19.5192	0.758511	0	0	0
2000	900	0.006076	0.012437	-72.4326	0.001794	0.006724	cpx	Na0.06Ca0.81Fe''0.51Mg0.51Fe'''0.05Ti0.00Al0.11Si1.95O6	50.5904	0	2.40658	1.80571	0	15.8711	8.96266	19.6015	0.762059	0	0	0
whitlockite	thermodynamic	data	and	composition:
Pressure	Temperature	mass	S	H	V	Cp	formula
2000	1110	0.005673	0.013304	-67.632	0.001785	0.005987	Ca3(PO4)2
2000	1105	0.016757	0.039236	-199.88	0.005274	0.017678	Ca3(PO4)2
2000	1100	0.013764	0.032174	-164.246	0.004332	0.014514	Ca3(PO4)2
2000	1095	0.012193	0.028036	-146.138	0.003837	0.017339	Ca3(PO4)2
2000	1090	0.010443	0.023959	-125.241	0.003287	0.014807	Ca3(PO4)2
2000	1085	0.00906	0.020738	-108.715	0.002851	0.012807	Ca3(PO4)2
2000	1080	0.007957	0.018173	-95.5421	0.002504	0.011215	Ca3(PO4)2
2000	1075	0.007064	0.016095	-84.8629	0.002223	0.009927	Ca3(PO4)2
2000	1070	0.006329	0.014388	-76.0799	0.001992	0.008868	Ca3(PO4)2
2000	1065	0.005717	0.012968	-68.767	0.001799	0.007987	Ca3(PO4)2
2000	1060	0.005203	0.011773	-62.6137	0.001637	0.007247	Ca3(PO4)2
2000	1055	0.004766	0.01076	-57.3894	0.0015	0.006619	Ca3(PO4)2
2000	1050	0.004392	0.009893	-52.9205	0.001382	0.006082	Ca3(PO4)2
2000	1045	0.004071	0.009148	-49.0746	0.001281	0.005621	Ca3(PO4)2
2000	1040	0.003793	0.008503	-45.7502	0.001194	0.005222	Ca3(PO4)2
2000	1035	0.003552	0.007945	-42.8698	0.001118	0.004876	Ca3(PO4)2
2000	1030	0.003343	0.007461	-40.3751	0.001052	0.004576	Ca3(PO4)2
2000	1025	0.003163	0.007043	-38.224	0.000996	0.004318	Ca3(PO4)2
2000	1020	0.00301	0.006685	-36.3904	0.000947	0.004096	Ca3(PO4)2
2000	1015	0.002882	0.006386	-34.8632	0.000907	0.003911	Ca3(PO4)2
2000	1010	0.00278	0.006145	-33.6464	0.000875	0.003762	Ca3(PO4)2
2000	1005	0.002773	0.006115	-33.5843	0.000873	0.003742	Ca3(PO4)2
2000	1000	0.002708	0.005956	-32.8067	0.000852	0.003643	Ca3(PO4)2
2000	995	0.002649	0.005814	-32.1188	0.000834	0.003554	Ca3(PO4)2
2000	990	0.002589	0.005668	-31.4036	0.000815	0.003464	Ca3(PO4)2
2000	985	0.002502	0.005464	-30.3616	0.000787	0.003337	Ca3(PO4)2
2000	980	0.002391	0.005209	-29.0327	0.000752	0.003181	Ca3(PO4)2
2000	975	0.002259	0.00491	-27.4516	0.000711	0.002997	Ca3(PO4)2
2000	970	0.002123	0.004603	-25.8076	0.000668	0.002808	Ca3(PO4)2
2000	965	0.001997	0.004318	-24.2853	0.000628	0.002634	Ca3(PO4)2
2000	960	0.001884	0.004064	-22.9247	0.000593	0.002478	Ca3(PO4)2
2000	955	0.001645	0.00354	-20.0275	0.000518	0.002158	Ca3(PO4)2
2000	950	0.001687	0.003622	-20.5529	0.000531	0.002207	Ca3(PO4)2
2000	945	0.001608	0.003442	-19.596	0.000506	0.002097	Ca3(PO4)2
2000	940	0.001536	0.003282	-18.7381	0.000484	0.001999	Ca3(PO4)2
2000	935	0.001472	0.003136	-17.9608	0.000463	0.00191	Ca3(PO4)2
2000	930	0.001413	0.003003	-17.2497	0.000445	0.001828	Ca3(PO4)2
2000	925	0.001358	0.00288	-16.5935	0.000428	0.001753	Ca3(PO4)2
2000	920	0.001308	0.002765	-15.9827	0.000412	0.001683	Ca3(PO4)2
2000	915	0.00126	0.002658	-15.4096	0.000397	0.001617	Ca3(PO4)2
2000	910	0.001215	0.002556	-14.8677	0.000382	0.001555	Ca3(PO4)2
2000	905	0.001172	0.00246	-14.3516	0.000369	0.001497	Ca3(PO4)2
2000	900	0.001131	0.002368	-13.8567	0.000356	0.00144	Ca3(PO4)2
spinel_0	thermodynamic	data	and	composition:
Pressure	Temperature	mass	S	H	V	Cp	formula	SiO2	TiO2	Al2O3	Fe2O3	Cr2O3	FeO	MgO	CaO	Na2O	K2O	P2O5	H2O
2000	1220	0.00252	0.005754	-24.6361	0.00062	0.00283	Fe''0.31Mg0.72Fe'''0.26Al1.11Cr0.57Ti0.03O4	0	1.2911	32.3937	11.9667	25.0443	12.6083	16.6959	0	0	0	0	0
2000	1215	0.014888	0.033847	-141.92	0.003631	0.016552	Fe''0.34Mg0.70Fe'''0.29Al1.06Cr0.58Ti0.04O4	0	1.60912	30.6693	12.9441	25.1053	13.6694	16.0028	0	0	0	0	0
2000	1210	0.012931	0.029273	-119.971	0.003126	0.014222	Fe''0.37Mg0.68Fe'''0.31Al1.01Cr0.59Ti0.04O4	0	1.99882	28.8672	13.9905	25.0376	14.8239	15.2821	0	0	0	0	0
2000	1205	0.011547	0.026031	-104.069	0.002767	0.012557	Fe''0.40Mg0.65Fe'''0.34Al0.96Cr0.59Ti0.06O4	0	2.47987	26.981	15.1087	24.809	16.0862	14.5353	0	0	0	0	0
2000	1200	0.010597	0.02379	-92.5917	0.002515	0.011386	Fe''0.44Mg0.63Fe'''0.37Al0.90Cr0.59Ti0.07O4	0	3.0765	25.0186	16.2928	24.3752	17.465	13.7718	0	0	0	0	0
2000	1195	0.01	0.022363	-84.5877	0.002352	0.01061	Fe''0.49Mg0.60Fe'''0.41Al0.84Cr0.58Ti0.09O4	0	3.81769	23.0037	17.5253	23.6813	18.9612	13.0109	0	0	0	0	0
2000	1190	0.009727	0.021676	-79.5837	0.002267	0.010189	Fe''0.54Mg0.57Fe'''0.44Al0.77Cr0.56Ti0.11O4	0	4.73975	20.9631	18.7804	22.6659	20.5731	12.2777	0	0	0	0	0
2000	1185	0.010742	0.023876	-85.0921	0.002484	0.011117	Fe''0.59Mg0.55Fe'''0.48Al0.71Cr0.53Ti0.14O4	0	5.92834	18.9642	20.0437	21.1374	22.2883	11.6381	0	0	0	0	0
2000	1180	0.010931	0.024243	-83.7383	0.002509	0.011173	Fe''0.65Mg0.53Fe'''0.51Al0.64Cr0.49Ti0.18O4	0	7.43488	16.8491	21.2763	19.1923	24.2061	11.0413	0	0	0	0	0
2000	1175	0.011861	0.026262	-87.9012	0.002705	0.011982	Fe''0.72Mg0.51Fe'''0.55Al0.56Cr0.43Ti0.23O4	0	9.32408	14.6748	22.3825	16.7532	26.345	10.5204	0	0	0	0	0
2000	1170	0.013868	0.030661	-99.5589	0.003145	0.01386	Fe''0.79Mg0.50Fe'''0.58Al0.49Cr0.36Ti0.29O4	0	11.6164	12.4865	23.2334	13.8561	28.732	10.0755	0	0	0	0	0
2000	1165	0.017508	0.038652	-122.197	0.003953	0.01734	Fe''0.87Mg0.48Fe'''0.60Al0.41Cr0.28Ti0.36O4	0	14.1863	10.4299	23.6905	10.7035	31.2904	9.69944	0	0	0	0	0
2000	1160	0.023466	0.051712	-160.079	0.005281	0.023079	Fe''0.95Mg0.47Fe'''0.60Al0.34Cr0.20Ti0.43O4	0	16.7882	8.66408	23.7277	7.5944	33.8505	9.37517	0	0	0	0	0
2000	1155	0.032893	0.072312	-220.473	0.007386	0.032181	Fe''1.03Mg0.46Fe'''0.60Al0.29Cr0.13Ti0.49O4	0	19.2185	7.24255	23.4522	4.73721	36.2671	9.08236	0	0	0	0	0
2000	1150	0.050672	0.111043	-335.051	0.011358	0.049371	Fe''1.10Mg0.45Fe'''0.59Al0.25Cr0.06Ti0.55O4	0	21.3774	6.12848	23.0124	2.20846	38.4713	8.80192	0	0	0	0	0
2000	1145	0.186511	0.406862	-1217.37	0.041707	0.180982	Fe''1.16Mg0.43Fe'''0.59Al0.22Cr0.01Ti0.59O4	0	22.9753	5.30221	22.7177	0.228681	40.3319	8.44427	0	0	0	0	0
2000	1140	0.837895	1.8179	-5337.39	0.185984	0.806606	Fe''1.19Mg0.39Fe'''0.62Al0.20Cr0.00Ti0.59O4	0	22.503	4.95182	23.8354	0	41.077	7.63276	0	0	0	0	0
2000	1135	0.639795	1.38147	-3983.59	0.141037	0.611563	Fe''1.21Mg0.36Fe'''0.66Al0.19Cr0.00Ti0.57O4	0	21.7401	4.72569	25.1842	0	41.4386	6.91131	0	0	0	0	0
2000	1130	0.4474	0.961762	-2730.05	0.098042	0.425139	Fe''1.22Mg0.33Fe'''0.70Al0.19Cr0.00Ti0.55O4	0	20.9804	4.54537	26.5393	0	41.6225	6.31244	0	0	0	0	0
2000	1125	0.328853	0.703964	-1970.41	0.071688	0.310917	Fe''1.23Mg0.31Fe'''0.74Al0.18Cr0.00Ti0.54O4	0	20.228	4.39469	27.8942	0	41.6793	5.80379	0	0	0	0	0
2000	1120	0.252119	0.537534	-1485.49	0.054703	0.237324	Fe''1.24Mg0.28Fe'''0.78Al0.18Cr0.00Ti0.52O4	0	19.4814	4.26485	29.25	0	41.6403	5.36339	0	0	0	0	0
2000	1115	0.19999	0.424728	-1160.01	0.043207	0.187526	Fe''1.24Mg0.26Fe'''0.82Al0.17Cr0.00Ti0.50O4	0	18.7387	4.15059	30.6089	0	41.5254	4.97634	0	0	0	0	0
2000	1110	0.166964	0.353225	-953.992	0.035928	0.156011	Fe''1.24Mg0.25Fe'''0.86Al0.17Cr0.00Ti0.48O4	0	17.9855	4.04764	31.9951	0	41.345	4.62677	0	0	0	0	0
2000	1105	0.145015	0.305608	-816.436	0.031085	0.135066	Fe''1.23Mg0.23Fe'''0.90Al0.17Cr0.00Ti0.46O4	0	17.2093	3.95312	33.4303	0	41.1031	4.30419	0	0	0	0	0
2000	1100	0.120865	0.253746	-670.98	0.025816	0.112248	Fe''1.23Mg0.22Fe'''0.95Al0.16Cr0.00Ti0.45O4	0	16.4383	3.86761	34.863	0	40.8155	4.01555	0	0	0	0	0
2000	1095	0.103137	0.215712	-564.897	0.021955	0.095533	Fe''1.22Mg0.20Fe'''0.99Al0.16Cr0.00Ti0.43O4	0	15.6695	3.78972	36.2977	0	40.4882	3.75482	0	0	0	0	0
2000	1090	0.08921	0.185888	-482.323	0.018931	0.082437	Fe''1.22Mg0.19Fe'''1.03Al0.16Cr0.00Ti0.41O4	0	14.9036	3.71864	37.732	0	40.1274	3.51842	0	0	0	0	0
2000	1085	0.078301	0.16255	-418.071	0.016566	0.072198	Fe''1.21Mg0.18Fe'''1.07Al0.16Cr0.00Ti0.39O4	0	14.14	3.65367	39.166	0	39.7373	3.30306	0	0	0	0	0
2000	1080	0.069617	0.143985	-367.213	0.014687	0.064061	Fe''1.20Mg0.17Fe'''1.11Al0.15Cr0.00Ti0.37O4	0	13.3782	3.59427	40.5997	0	39.3217	3.10609	0	0	0	0	0
2000	1075	0.062611	0.129015	-326.382	0.013173	0.057506	Fe''1.19Mg0.16Fe'''1.15Al0.15Cr0.00Ti0.35O4	0	12.618	3.54006	42.0332	0	38.8834	2.92533	0	0	0	0	0
2000	1070	0.056905	0.116821	-293.239	0.011942	0.052173	Fe''1.18Mg0.15Fe'''1.20Al0.15Cr0.00Ti0.33O4	0	11.8589	3.49072	43.4665	0	38.4249	2.75896	0	0	0	0	0
2000	1065	0.052228	0.10682	-266.128	0.010933	0.047806	Fe''1.16Mg0.14Fe'''1.24Al0.15Cr0.00Ti0.31O4	0	11.1005	3.44602	44.9	0	37.9481	2.60544	0	0	0	0	0
2000	1060	0.048388	0.098595	-243.86	0.010105	0.044221	Fe''1.15Mg0.13Fe'''1.28Al0.15Cr0.00Ti0.29O4	0	10.3423	3.40579	46.334	0	37.4545	2.46343	0	0	0	0	0
2000	1055	0.045246	0.091846	-225.574	0.009428	0.041287	Fe''1.14Mg0.13Fe'''1.32Al0.15Cr0.00Ti0.27O4	0	9.58382	3.36987	47.7691	0	36.9454	2.3318	0	0	0	0	0
2000	1050	0.042704	0.086358	-210.654	0.008879	0.03891	Fe''1.12Mg0.12Fe'''1.37Al0.15Cr0.00Ti0.24O4	0	8.82441	3.33816	49.2061	0	36.4217	2.20955	0	0	0	0	0
2000	1045	0.040699	0.081987	-198.669	0.008444	0.037029	Fe''1.11Mg0.12Fe'''1.41Al0.14Cr0.00Ti0.22O4	0	8.06359	3.31055	50.6457	0	35.8844	2.09583	0	0	0	0	0
2000	1040	0.039192	0.078647	-189.352	0.008116	0.035608	Fe''1.09Mg0.11Fe'''1.45Al0.14Cr0.00Ti0.20O4	0	7.30098	3.28692	52.0882	0	35.334	1.98989	0	0	0	0	0
2000	1035	0.038177	0.07631	-182.576	0.00789	0.034636	Fe''1.08Mg0.10Fe'''1.49Al0.14Cr0.00Ti0.18O4	0	6.5365	3.26712	53.5336	0	34.7716	1.8911	0	0	0	0	0
2000	1030	0.037675	0.075009	-178.371	0.007772	0.034133	Fe''1.06Mg0.10Fe'''1.54Al0.14Cr0.00Ti0.16O4	0	5.77061	3.25092	54.9812	0	34.1984	1.79894	0	0	0	0	0
2000	1025	0.037748	0.074853	-176.948	0.007774	0.034152	Fe''1.04Mg0.09Fe'''1.58Al0.14Cr0.00Ti0.14O4	0	5.0047	3.23792	56.4283	0	33.6161	1.71299	0	0	0	0	0
2000	1020	0.038511	0.076055	-178.76	0.007918	0.034794	Fe''1.03Mg0.09Fe'''1.62Al0.14Cr0.00Ti0.12O4	0	4.24182	3.22748	57.8698	0	33.0279	1.63298	0	0	0	0	0
2000	1015	0.040152	0.078968	-184.592	0.008243	0.036226	Fe''1.01Mg0.09Fe'''1.66Al0.14Cr0.00Ti0.10O4	0	3.4878	3.21843	59.2958	0	32.4392	1.55882	0	0	0	0	0
2000	1010	0.042964	0.084145	-195.677	0.008807	0.038709	Fe''0.99Mg0.08Fe'''1.70Al0.14Cr0.00Ti0.08O4	0	2.75324	3.20882	60.688	0	31.8593	1.49066	0	0	0	0	0
2000	1005	0.045286	0.088322	-204.396	0.00927	0.040744	Fe''0.98Mg0.08Fe'''1.74Al0.14Cr0.00Ti0.06O4	0	2.08476	3.18637	61.9667	0	31.3417	1.42042	0	0	0	0	0
2000	1000	0.050646	0.09837	-226.678	0.010354	0.045505	Fe''0.97Mg0.08Fe'''1.78Al0.14Cr0.00Ti0.04O4	0	1.47712	3.15649	63.1405	0	30.8687	1.35717	0	0	0	0	0
2000	995	0.057713	0.11165	-256.394	0.011785	0.051789	Fe''0.95Mg0.07Fe'''1.81Al0.14Cr0.00Ti0.03O4	0	0.96255	3.11424	64.1543	0	30.4657	1.30327	0	0	0	0	0
2000	990	0.064845	0.124986	-286.319	0.013228	0.058123	Fe''0.95Mg0.07Fe'''1.83Al0.13Cr0.00Ti0.02O4	0	0.573627	3.05462	64.9516	0	30.1604	1.2598	0	0	0	0	0
2000	985	0.069196	0.132932	-304.09	0.014102	0.061964	Fe''0.94Mg0.07Fe'''1.85Al0.13Cr0.00Ti0.01O4	0	0.31754	2.97725	65.5187	0	29.9603	1.22626	0	0	0	0	0
2000	980	0.068002	0.130251	-297.749	0.013847	0.060842	Fe''0.94Mg0.07Fe'''1.86Al0.13Cr0.00Ti0.00O4	0	0.169665	2.8861	65.8956	0	29.8514	1.19723	0	0	0	0	0
2000	975	0.063383	0.121069	-276.696	0.012896	0.056662	Fe''0.94Mg0.07Fe'''1.87Al0.12Cr0.00Ti0.00O4	0	0.0900522	2.78834	66.1495	0	29.8021	1.17001	0	0	0	0	0
2000	970	0.057912	0.110334	-252.18	0.011774	0.051733	Fe''0.94Mg0.06Fe'''1.88Al0.12Cr0.00Ti0.00O4	0	0.0480879	2.68957	66.3329	0	29.785	1.14453	0	0	0	0	0
2000	965	0.052384	0.099552	-227.605	0.010642	0.04676	Fe''0.94Mg0.06Fe'''1.88Al0.12Cr0.00Ti0.00O4	0	0.0260239	2.59255	66.4764	0	29.7849	1.12015	0	0	0	0	0
2000	960	0.04727	0.089614	-204.976	0.009596	0.042166	Fe''0.94Mg0.06Fe'''1.89Al0.11Cr0.00Ti0.00O4	0	0.0143146	2.49854	66.5967	0	29.7939	1.09652	0	0	0	0	0
2000	955	0.042326	0.080047	-183.236	0.008587	0.037733	Fe''0.94Mg0.06Fe'''1.89Al0.11Cr0.00Ti0.00O4	0	0	2.40906	66.7224	0	29.7853	1.08325	0	0	0	0	0
2000	950	0.039044	0.073665	-168.743	0.007916	0.034784	Fe''0.94Mg0.06Fe'''1.90Al0.10Cr0.00Ti0.00O4	0	0	2.32141	66.8132	0	29.8049	1.0605	0	0	0	0	0
2000	945	0.035457	0.066738	-152.998	0.007184	0.031568	Fe''0.94Mg0.06Fe'''1.90Al0.10Cr0.00Ti0.00O4	0	0	2.23753	66.8996	0	29.8248	1.03803	0	0	0	0	0
2000	940	0.032323	0.060695	-139.266	0.006544	0.02876	Fe''0.94Mg0.06Fe'''1.90Al0.10Cr0.00Ti0.00O4	0	0	2.15716	66.9821	0	29.8449	1.01578	0	0	0	0	0
2000	935	0.029568	0.05539	-127.216	0.005983	0.026293	Fe''0.94Mg0.06Fe'''1.91Al0.09Cr0.00Ti0.00O4	0	0	2.08007	67.0609	0	29.8653	0.99374	0	0	0	0	0
2000	930	0.027134	0.050709	-116.586	0.005487	0.024114	Fe''0.95Mg0.05Fe'''1.91Al0.09Cr0.00Ti0.00O4	0	0	2.00608	67.1361	0	29.886	0.971867	0	0	0	0	0
2000	925	0.024972	0.046559	-107.162	0.005046	0.022179	Fe''0.95Mg0.05Fe'''1.91Al0.09Cr0.00Ti0.00O4	0	0	1.93498	67.2079	0	29.907	0.95014	0	0	0	0	0
2000	920	0.023045	0.042863	-98.7732	0.004654	0.020456	Fe''0.95Mg0.05Fe'''1.92Al0.08Cr0.00Ti0.00O4	0	0	1.86662	67.2766	0	29.9282	0.928542	0	0	0	0	0
2000	915	0.02132	0.03956	-91.276	0.004303	0.018914	Fe''0.95Mg0.05Fe'''1.92Al0.08Cr0.00Ti0.00O4	0	0	1.80084	67.3424	0	29.9497	0.907056	0	0	0	0	0
2000	910	0.019771	0.036598	-84.5519	0.003988	0.017529	Fe''0.95Mg0.05Fe'''1.92Al0.08Cr0.00Ti0.00O4	0	0	1.7375	67.4053	0	29.9715	0.885668	0	0	0	0	0
2000	905	0.018375	0.033933	-78.5014	0.003704	0.016283	Fe''0.95Mg0.05Fe'''1.93Al0.07Cr0.00Ti0.00O4	0	0	1.67649	67.4655	0	29.9936	0.86437	0	0	0	0	0
2000	900	0.017113	0.031527	-73.0403	0.003448	0.015156	Fe''0.95Mg0.05Fe'''1.93Al0.07Cr0.00Ti0.00O4	0	0	1.61768	67.5232	0	30.016	0.843153	0	0	0	0	0
clinopyroxene_1	thermodynamic	data	and	composition:
Pressure	Temperature	mass	S	H	V	Cp	structure	formula	SiO2	TiO2	Al2O3	Fe2O3	Cr2O3	FeO	MgO	CaO	Na2O	K2O	P2O5	H2O
2000	1185	0.716308	1.72143	-8819.1	0.219734	0.876495	cpx	Na0.01Ca0.28Fe''0.37Mg1.24Fe'''0.03Ti0.01Al0.16Si1.90O6	52.3389	0.312844	3.68629	1.21443	0	12.2179	22.8879	7.20983	0.131853	0	0	0
2000	1180	0.68655	1.64624	-8428.56	0.210255	0.838548	cpx	Na0.01Ca0.28Fe''0.38Mg1.23Fe'''0.03Ti0.01Al0.16Si1.90O6	52.2249	0.336814	3.68464	1.24926	0	12.5652	22.6781	7.12471	0.136415	0	0	0
2000	1175	0.594025	1.42124	-7272.19	0.181622	0.724252	cpx	Na0.01Ca0.27Fe''0.39Mg1.22Fe'''0.04Ti0.01Al0.16Si1.90O6	52.1166	0.360465	3.67963	1.28243	0	12.9085	22.4807	7.03089	0.140823	0	0	0
2000	1170	0.517475	1.23536	-6317.57	0.157964	0.629833	cpx	Na0.01Ca0.27Fe''0.40Mg1.21Fe'''0.04Ti0.01Al0.16Si1.90O6	52.0137	0.383646	3.6711	1.31393	0	13.2484	22.2943	6.92979	0.145087	0	0	0
2000	1165	0.453174	1.07949	-5517.51	0.138118	0.550643	cpx	Na0.01Ca0.27Fe''0.42Mg1.20Fe'''0.04Ti0.01Al0.16Si1.90O6	51.9164	0.406154	3.6588	1.34375	0	13.5856	22.1173	6.82279	0.149217	0	0	0
2000	1160	0.398332	0.946768	-4836.75	0.121216	0.483206	cpx	Na0.01Ca0.26Fe''0.43Mg1.20Fe'''0.04Ti0.01Al0.16Si1.90O6	51.8245	0.427704	3.6424	1.37187	0	13.9208	21.9482	6.71139	0.15322	0	0	0
2000	1155	0.350798	0.831954	-4248.19	0.106588	0.424851	cpx	Na0.01Ca0.26Fe''0.44Mg1.19Fe'''0.04Ti0.01Al0.16Si1.90O6	51.7382	0.44787	3.6214	1.39827	0	14.2552	21.7847	6.59734	0.157106	0	0	0
2000	1150	0.30864	0.73035	-3727.63	0.093636	0.373184	cpx	Na0.01Ca0.25Fe''0.45Mg1.18Fe'''0.04Ti0.01Al0.16Si1.90O6	51.6575	0.465818	3.59471	1.42299	0	14.5916	21.6229	6.48363	0.160888	0	0	0
2000	1145	0.261979	0.618461	-3154.33	0.079351	0.316167	cpx	Na0.01Ca0.25Fe''0.46Mg1.17Fe'''0.04Ti0.01Al0.15Si1.90O6	51.5818	0.473125	3.55063	1.44737	0	14.9681	21.416	6.39822	0.16469	0	0	0
2000	1140	0.169795	0.399551	-2033.43	0.051307	0.20422	cpx	Na0.01Ca0.26Fe''0.48Mg1.15Fe'''0.04Ti0.01Al0.15Si1.90O6	51.5046	0.428936	3.43738	1.4794	0	15.5659	20.9401	6.47458	0.16913	0	0	0
2000	1135	0.138041	0.3238	-1644.61	0.041616	0.165485	cpx	Na0.01Ca0.26Fe''0.50Mg1.13Fe'''0.04Ti0.01Al0.15Si1.90O6	51.431	0.385158	3.33061	1.51025	0	16.1418	20.4865	6.54116	0.173445	0	0	0
2000	1130	0.12087	0.282661	-1433.23	0.036362	0.144468	cpx	Na0.01Ca0.26Fe''0.52Mg1.11Fe'''0.04Ti0.01Al0.14Si1.90O6	51.3634	0.347554	3.23415	1.53789	0	16.6745	20.0844	6.58061	0.177534	0	0	0
2000	1125	0.106401	0.248089	-1256.1	0.031944	0.12682	cpx	Na0.01Ca0.26Fe''0.53Mg1.09Fe'''0.04Ti0.01Al0.14Si1.91O6	51.3007	0.314697	3.14457	1.56256	0	17.1756	19.7213	6.5992	0.181398	0	0	0
2000	1120	0.09386	0.218218	-1103.42	0.028125	0.111579	cpx	Na0.01Ca0.26Fe''0.55Mg1.08Fe'''0.04Ti0.01Al0.13Si1.91O6	51.2417	0.285571	3.06008	1.5847	0	17.6539	19.3875	6.60152	0.185043	0	0	0
2000	1115	0.083016	0.192462	-972.043	0.02483	0.098441	cpx	Na0.01Ca0.26Fe''0.57Mg1.06Fe'''0.05Ti0.01Al0.13Si1.91O6	51.1851	0.259464	2.97962	1.60473	0	18.1155	19.0762	6.59088	0.18848	0	0	0
2000	1110	0.076138	0.176019	-887.984	0.022731	0.090063	cpx	Na0.01Ca0.26Fe''0.58Mg1.05Fe'''0.05Ti0.01Al0.13Si1.91O6	51.1283	0.235543	2.9019	1.62389	0	18.5719	18.7757	6.57091	0.191785	0	0	0
2000	1105	0.07216	0.166353	-838.228	0.021503	0.085148	cpx	Na0.01Ca0.26Fe''0.60Mg1.03Fe'''0.05Ti0.01Al0.12Si1.92O6	51.0689	0.213237	2.82584	1.64322	0	19.0328	18.4769	6.54401	0.195031	0	0	0
2000	1100	0.063405	0.145759	-733.649	0.018859	0.074637	cpx	Na0.01Ca0.26Fe''0.61Mg1.02Fe'''0.05Ti0.01Al0.12Si1.92O6	51.0107	0.19299	2.75252	1.66095	0	19.484	18.1919	6.50888	0.198082	0	0	0
2000	1095	0.056278	0.129014	-648.679	0.016709	0.066092	cpx	Na0.01Ca0.26Fe''0.63Mg1.01Fe'''0.05Ti0.00Al0.12Si1.92O6	50.9528	0.17448	2.68157	1.67747	0	19.9289	17.9167	6.46707	0.200962	0	0	0
2000	1090	0.049944	0.114178	-573.498	0.014802	0.058519	cpx	Na0.01Ca0.26Fe''0.64Mg0.99Fe'''0.05Ti0.00Al0.12Si1.92O6	50.8951	0.157521	2.61284	1.69288	0	20.3684	17.65	6.41957	0.203677	0	0	0
2000	1085	0.044501	0.101453	-509.08	0.013166	0.052022	cpx	Na0.02Ca0.26Fe''0.66Mg0.98Fe'''0.05Ti0.00Al0.11Si1.92O6	50.8373	0.141935	2.54615	1.70735	0	20.8037	17.39	6.3673	0.206239	0	0	0
2000	1080	0.039794	0.090469	-453.532	0.011752	0.046414	cpx	Na0.02Ca0.26Fe''0.67Mg0.97Fe'''0.05Ti0.00Al0.11Si1.92O6	50.779	0.127578	2.48137	1.72101	0	21.236	17.1354	6.31101	0.20866	0	0	0
2000	1075	0.035694	0.080924	-405.299	0.010523	0.041539	cpx	Na0.02Ca0.25Fe''0.69Mg0.96Fe'''0.05Ti0.00Al0.11Si1.93O6	50.7202	0.114332	2.41835	1.73397	0	21.6658	16.885	6.25132	0.21095	0	0	0
2000	1070	0.0321	0.072575	-363.148	0.009447	0.037274	cpx	Na0.02Ca0.25Fe''0.70Mg0.94Fe'''0.05Ti0.00Al0.11Si1.93O6	50.6607	0.102097	2.35699	1.74632	0	22.094	16.6381	6.18875	0.213119	0	0	0
2000	1065	0.028931	0.065228	-326.087	0.008499	0.033519	cpx	Na0.02Ca0.25Fe''0.72Mg0.93Fe'''0.05Ti0.00Al0.10Si1.93O6	50.6004	0.0907877	2.2972	1.75813	0	22.5208	16.3938	6.12375	0.215175	0	0	0
2000	1060	0.026119	0.058723	-293.304	0.00766	0.030194	cpx	Na0.02Ca0.25Fe''0.73Mg0.92Fe'''0.05Ti0.00Al0.10Si1.93O6	50.5392	0.0803328	2.23888	1.76944	0	22.9466	16.1517	6.05669	0.217128	0	0	0
2000	1055	0.023607	0.052928	-264.123	0.006911	0.02723	cpx	Na0.02Ca0.25Fe''0.75Mg0.91Fe'''0.05Ti0.00Al0.10Si1.93O6	50.4771	0.0706689	2.18196	1.7803	0	23.3717	15.9114	5.98791	0.218985	0	0	0
2000	1050	0.021348	0.04773	-237.972	0.006239	0.02457	cpx	Na0.02Ca0.24Fe''0.76Mg0.90Fe'''0.05Ti0.00Al0.10Si1.93O6	50.4142	0.0617408	2.12636	1.79071	0	23.7959	15.6726	5.91768	0.220752	0	0	0
2000	1045	0.019301	0.04303	-214.352	0.00563	0.022165	cpx	Na0.02Ca0.24Fe''0.78Mg0.88Fe'''0.05Ti0.00Al0.09Si1.93O6	50.3506	0.0535007	2.072	1.80068	0	24.2194	15.4351	5.84627	0.222436	0	0	0
2000	1040	0.017426	0.038741	-192.816	0.005074	0.019967	cpx	Na0.02Ca0.24Fe''0.79Mg0.87Fe'''0.05Ti0.00Al0.09Si1.94O6	50.2863	0.0459064	2.0188	1.81018	0	24.6418	15.1991	5.77388	0.224043	0	0	0
2000	1035	0.015687	0.034777	-172.941	0.00456	0.017936	cpx	Na0.02Ca0.24Fe''0.81Mg0.86Fe'''0.05Ti0.00Al0.09Si1.94O6	50.2216	0.038922	1.96667	1.81914	0	25.0627	14.9646	5.7007	0.225579	0	0	0
2000	1030	0.014049	0.031055	-154.306	0.004077	0.016027	cpx	Na0.02Ca0.23Fe''0.82Mg0.85Fe'''0.05Ti0.00Al0.09Si1.94O6	50.1569	0.0325171	1.91552	1.82744	0	25.4815	14.7322	5.62691	0.22705	0	0	0
2000	1025	0.012469	0.027485	-136.456	0.003612	0.014194	cpx	Na0.02Ca0.23Fe''0.84Mg0.84Fe'''0.05Ti0.00Al0.09Si1.94O6	50.0925	0.0266682	1.86522	1.83489	0	25.8968	14.5028	5.55264	0.22846	0	0	0
2000	1020	0.010901	0.023959	-118.864	0.003152	0.012382	cpx	Na0.02Ca0.23Fe''0.85Mg0.83Fe'''0.05Ti0.00Al0.08Si1.94O6	50.0293	0.0213599	1.81559	1.84119	0	26.3071	14.2777	5.47801	0.229814	0	0	0
2000	1015	0.009281	0.020342	-100.851	0.002679	0.01052	cpx	Na0.02Ca0.22Fe''0.87Mg0.81Fe'''0.05Ti0.00Al0.08Si1.94O6	49.9684	0.0165878	1.76639	1.84585	0	26.7094	14.0591	5.40314	0.231114	0	0	0
2000	1010	0.007526	0.016448	-81.5019	0.002169	0.008513	cpx	Na0.02Ca0.22Fe''0.88Mg0.80Fe'''0.05Ti0.00Al0.08Si1.94O6	49.9115	0.0123634	1.71729	1.84809	0	27.0994	13.8508	5.3281	0.232362	0	0	0
feldspar_0	thermodynamic	data	and	composition:
Pressure	Temperature	mass	S	H	V	Cp	formula	SiO2	TiO2	Al2O3	Fe2O3	Cr2O3	FeO	MgO	CaO	Na2O	K2O	P2O5	H2O
2000	1245	0.629681	1.56064	-8619.04	0.235345	0.778934	K0.00Na0.20Ca0.80Al1.80Si2.20O8	48.0025	0	33.4092	0	0	0	0	16.3622	2.22241	0.00374561	0	0
2000	1240	2.34774	5.81257	-32146.3	0.877855	2.90325	K0.00Na0.20Ca0.80Al1.80Si2.20O8	48.1839	0	33.2869	0	0	0	0	16.219	2.30616	0.00402674	0	0
2000	1235	2.24421	5.55033	-30738.6	0.839517	2.77428	K0.00Na0.21Ca0.79Al1.79Si2.21O8	48.3707	0	33.161	0	0	0	0	16.0716	2.39238	0.00432954	0	0
2000	1230	5.07243	12.5353	-69494.5	1.89889	6.26876	K0.00Na0.22Ca0.78Al1.78Si2.22O8	48.6518	0	32.9716	0	0	0	0	15.8497	2.52208	0.00491827	0	0
2000	1225	5.10812	12.6182	-69995.9	1.91436	6.31154	K0.00Na0.24Ca0.76Al1.76Si2.24O8	49.0562	0	32.6989	0	0	0	0	15.5304	2.70865	0.00580106	0	0
2000	1220	4.38772	10.8354	-60133.2	1.64641	5.42044	K0.00Na0.26Ca0.74Al1.74Si2.26O8	49.5063	0	32.3956	0	0	0	0	15.1751	2.9162	0.0068723	0	0
2000	1215	3.57061	8.81469	-48942	1.34146	4.41021	K0.00Na0.28Ca0.72Al1.72Si2.28O8	49.9571	0	32.0916	0	0	0	0	14.8191	3.12408	0.0080556	0	0
2000	1210	2.97419	7.33973	-40773	1.11876	3.67288	K0.00Na0.29Ca0.71Al1.71Si2.29O8	50.4076	0	31.7879	0	0	0	0	14.4634	3.33169	0.00936164	0	0
2000	1205	2.52392	6.22619	-34605.5	0.950547	3.11627	K0.00Na0.31Ca0.69Al1.69Si2.31O8	50.8575	0	31.4845	0	0	0	0	14.1082	3.53899	0.0108045	0	0
2000	1200	2.17641	5.36677	-29845.4	0.820669	2.68672	K0.00Na0.33Ca0.67Al1.67Si2.33O8	51.307	0	31.1814	0	0	0	0	13.7532	3.74596	0.0124012	0	0
2000	1195	1.9023	4.68882	-26090.5	0.718178	2.34791	K0.00Na0.35Ca0.65Al1.65Si2.35O8	51.7556	0	30.8789	0	0	0	0	13.3989	3.95244	0.0141711	0	0
2000	1190	1.68236	4.14482	-23077.6	0.635909	2.07607	K0.00Na0.37Ca0.63Al1.63Si2.37O8	52.2028	0	30.5772	0	0	0	0	13.0457	4.15816	0.0161373	0	0
2000	1185	1.58333	3.89865	-21723	0.599143	1.95347	K0.00Na0.38Ca0.62Al1.62Si2.38O8	52.6197	0	30.2958	0	0	0	0	12.7163	4.34968	0.0184569	0	0
2000	1180	1.42384	3.50383	-19538.3	0.539377	1.75633	K0.00Na0.40Ca0.60Al1.60Si2.40O8	53.0302	0	30.0188	0	0	0	0	12.392	4.538	0.0210577	0	0
2000	1175	1.26066	3.10033	-17302.2	0.478078	1.55472	K0.00Na0.41Ca0.58Al1.58Si2.42O8	53.4389	0	29.7429	0	0	0	0	12.0689	4.72537	0.0239526	0	0
2000	1170	1.12704	2.76991	-15471	0.427861	1.38963	K0.00Na0.43Ca0.57Al1.57Si2.43O8	53.8462	0	29.4678	0	0	0	0	11.7469	4.91191	0.0271825	0	0
2000	1165	1.0165	2.49658	-13956.2	0.386312	1.25308	K0.00Na0.45Ca0.55Al1.55Si2.45O8	54.2526	0	29.1932	0	0	0	0	11.4256	5.09776	0.0307965	0	0
2000	1160	0.924354	2.26869	-12693.3	0.351664	1.13926	K0.00Na0.46Ca0.54Al1.54Si2.46O8	54.6582	0	28.9191	0	0	0	0	11.1048	5.28303	0.0348545	0	0
2000	1155	0.847186	2.07782	-11635.7	0.322648	1.04393	K0.00Na0.48Ca0.52Al1.52Si2.48O8	55.0636	0	28.645	0	0	0	0	10.7841	5.46787	0.0394312	0	0
2000	1150	0.783851	1.92108	-10767.8	0.298843	0.965678	K0.00Na0.49Ca0.50Al1.50Si2.50O8	55.4696	0	28.3704	0	0	0	0	10.4628	5.65259	0.0446304	0	0
2000	1145	0.774826	1.8976	-10645.6	0.295724	0.954359	K0.00Na0.51Ca0.49Al1.49Si2.51O8	55.887	0	28.0878	0	0	0	0	10.1323	5.84199	0.050895	0	0
2000	1140	0.935029	2.28858	-12848.2	0.357312	1.15147	K0.00Na0.53Ca0.47Al1.47Si2.53O8	56.3588	0	27.768	0	0	0	0	9.75837	6.05491	0.0599181	0	0
2000	1135	0.743455	1.81844	-10217.2	0.284438	0.915371	K0.00Na0.54Ca0.45Al1.45Si2.55O8	56.8067	0	27.4642	0	0	0	0	9.40318	6.25656	0.0693662	0	0
2000	1130	0.587984	1.43708	-8081.83	0.225205	0.723795	K0.00Na0.56Ca0.44Al1.44Si2.56O8	57.2313	0	27.176	0	0	0	0	9.06635	6.44728	0.079051	0	0
2000	1125	0.481495	1.17584	-6619.22	0.184612	0.592576	K0.01Na0.58Ca0.42Al1.42Si2.58O8	57.6368	0	26.9007	0	0	0	0	8.74458	6.62895	0.0890507	0	0
2000	1120	0.404635	0.987268	-5563.57	0.155297	0.497865	K0.01Na0.59Ca0.40Al1.40Si2.60O8	58.0251	0	26.6368	0	0	0	0	8.43624	6.80248	0.0994105	0	0
2000	1115	0.346833	0.84544	-4769.67	0.133239	0.426638	K0.01Na0.60Ca0.39Al1.39Si2.61O8	58.3977	0	26.3833	0	0	0	0	8.14022	6.96854	0.110159	0	0
2000	1110	0.304926	0.742557	-4194.14	0.117248	0.374991	K0.01Na0.62Ca0.38Al1.38Si2.62O8	58.7597	0	26.137	0	0	0	0	7.8525	7.12927	0.121542	0	0
2000	1105	0.27352	0.665402	-3762.86	0.105266	0.336279	K0.01Na0.63Ca0.36Al1.36Si2.64O8	59.1158	0	25.8944	0	0	0	0	7.56928	7.28671	0.133867	0	0
2000	1100	0.24176	0.587515	-3326.59	0.093123	0.29715	K0.01Na0.64Ca0.35Al1.35Si2.65O8	59.4579	0	25.6611	0	0	0	0	7.29695	7.43745	0.146645	0	0
2000	1095	0.216075	0.524516	-2973.76	0.083298	0.265505	K0.01Na0.66Ca0.34Al1.34Si2.66O8	59.7876	0	25.436	0	0	0	0	7.03434	7.58215	0.159922	0	0
2000	1090	0.194395	0.471346	-2675.93	0.075	0.238794	K0.01Na0.67Ca0.32Al1.32Si2.68O8	60.1052	0	25.219	0	0	0	0	6.78118	7.72097	0.173665	0	0
2000	1085	0.176061	0.426383	-2424.06	0.067977	0.216206	K0.01Na0.68Ca0.31Al1.31Si2.69O8	60.4115	0	25.0095	0	0	0	0	6.53687	7.85429	0.187867	0	0
2000	1080	0.160356	0.387873	-2208.31	0.061959	0.196859	K0.01Na0.69Ca0.30Al1.30Si2.70O8	60.7072	0	24.807	0	0	0	0	6.30087	7.98242	0.20252	0	0
2000	1075	0.14675	0.354511	-2021.37	0.056741	0.180097	K0.01Na0.70Ca0.29Al1.29Si2.71O8	60.9928	0	24.6112	0	0	0	0	6.07269	8.10567	0.217609	0	0
2000	1070	0.134842	0.325321	-1857.76	0.052171	0.165428	K0.01Na0.71Ca0.28Al1.28Si2.72O8	61.269	0	24.4217	0	0	0	0	5.85189	8.22429	0.233113	0	0
2000	1065	0.124326	0.29955	-1713.28	0.048134	0.152475	K0.01Na0.72Ca0.27Al1.27Si2.73O8	61.5362	0	24.2382	0	0	0	0	5.63811	8.33853	0.249005	0	0
2000	1060	0.114965	0.276616	-1584.64	0.044537	0.140945	K0.02Na0.73Ca0.26Al1.26Si2.74O8	61.7948	0	24.0603	0	0	0	0	5.431	8.44861	0.265251	0	0
2000	1055	0.106568	0.256053	-1469.24	0.041309	0.130604	K0.02Na0.74Ca0.25Al1.25Si2.75O8	62.0454	0	23.8878	0	0	0	0	5.23027	8.55474	0.281806	0	0
2000	1050	0.098981	0.237485	-1364.98	0.03839	0.121263	K0.02Na0.74Ca0.24Al1.24Si2.76O8	62.2881	0	23.7206	0	0	0	0	5.03563	8.65711	0.298614	0	0
2000	1045	0.09208	0.220604	-1270.11	0.035733	0.112766	K0.02Na0.75Ca0.23Al1.23Si2.77O8	62.5233	0	23.5583	0	0	0	0	4.84685	8.75592	0.315608	0	0
2000	1040	0.085757	0.20515	-1183.19	0.033297	0.104984	K0.02Na0.76Ca0.22Al1.22Si2.78O8	62.7514	0	23.4008	0	0	0	0	4.6637	8.85136	0.332701	0	0
2000	1035	0.079921	0.1909	-1102.95	0.031047	0.097802	K0.02Na0.77Ca0.21Al1.21Si2.79O8	62.9727	0	23.2479	0	0	0	0	4.48597	8.94364	0.349783	0	0
2000	1030	0.07449	0.177651	-1028.25	0.028952	0.09112	K0.02Na0.77Ca0.20Al1.20Si2.80O8	63.1874	0	23.0995	0	0	0	0	4.31344	9.03297	0.366713	0	0
2000	1025	0.069385	0.165217	-958.041	0.026981	0.084842	K0.02Na0.78Ca0.20Al1.20Si2.80O8	63.3958	0	22.9554	0	0	0	0	4.14592	9.11959	0.383308	0	0
2000	1020	0.064536	0.153421	-891.317	0.025106	0.079679	K0.02Na0.79Ca0.19Al1.19Si2.81O8	63.5983	0	22.8154	0	0	0	0	3.98316	9.20383	0.399324	0	0
2000	1015	0.059865	0.142084	-827.038	0.0233	0.073893	K0.02Na0.80Ca0.18Al1.18Si2.82O8	63.7953	0	22.6793	0	0	0	0	3.82486	9.28609	0.414429	0	0
2000	1010	0.055275	0.130972	-763.846	0.021522	0.068209	K0.02Na0.80Ca0.17Al1.17Si2.83O8	63.9875	0	22.5468	0	0	0	0	3.6707	9.36688	0.428167	0	0
2000	1005	0.052449	0.124062	-725.022	0.020429	0.064704	K0.02Na0.81Ca0.17Al1.17Si2.83O8	64.1579	0	22.4297	0	0	0	0	3.53439	9.43971	0.43831	0	0
2000	1000	0.047679	0.11258	-659.284	0.018577	0.058803	K0.03Na0.81Ca0.16Al1.16Si2.84O8	64.3242	0	22.316	0	0	0	0	3.40173	9.51209	0.446039	0	0
2000	995	0.042954	0.101244	-594.141	0.016742	0.052961	K0.03Na0.82Ca0.15Al1.15Si2.85O8	64.4905	0	22.2028	0	0	0	0	3.26958	9.58613	0.450974	0	0
2000	990	0.038817	0.091332	-537.109	0.015135	0.047849	K0.03Na0.83Ca0.15Al1.15Si2.85O8	64.6581	0	22.0894	0	0	0	0	3.13692	9.66242	0.453099	0	0
2000	985	0.035856	0.084214	-496.307	0.013985	0.044187	K0.03Na0.83Ca0.14Al1.14Si2.86O8	64.8266	0	21.9759	0	0	0	0	3.00398	9.74026	0.453239	0	0
2000	980	0.034559	0.081019	-478.518	0.013483	0.042578	K0.03Na0.84Ca0.14Al1.14Si2.86O8	64.9878	0	21.8675	0	0	0	0	2.87692	9.81532	0.452433	0	0
2000	975	0.033925	0.079385	-469.903	0.013239	0.041785	K0.03Na0.84Ca0.13Al1.13Si2.87O8	65.1398	0	21.7653	0	0	0	0	2.75709	9.88607	0.451714	0	0
2000	970	0.033252	0.077665	-460.755	0.01298	0.040946	K0.03Na0.85Ca0.12Al1.12Si2.88O8	65.2849	0	21.6676	0	0	0	0	2.64267	9.95317	0.451695	0	0
2000	965	0.032493	0.075747	-450.39	0.012687	0.039999	K0.03Na0.86Ca0.12Al1.12Si2.88O8	65.4232	0	21.5742	0	0	0	0	2.53336	10.0167	0.452521	0	0
2000	960	0.031613	0.073555	-438.361	0.012346	0.038906	K0.03Na0.86Ca0.11Al1.11Si2.89O8	65.5552	0	21.485	0	0	0	0	2.42891	10.0768	0.454164	0	0
2000	955	0.030636	0.071137	-424.967	0.011966	0.03769	K0.03Na0.86Ca0.11Al1.11Si2.89O8	65.6515	0	21.42	0	0	0	0	2.35283	10.1211	0.454576	0	0
2000	950	0.029244	0.06777	-405.801	0.011424	0.035966	K0.03Na0.87Ca0.11Al1.11Si2.89O8	65.7689	0	21.3403	0	0	0	0	2.2597	10.1738	0.457293	0	0
2000	945	0.028189	0.065195	-391.309	0.011014	0.034658	K0.03Na0.87Ca0.10Al1.10Si2.90O8	65.881	0	21.264	0	0	0	0	2.1706	10.2237	0.460595	0	0
2000	940	0.027117	0.062588	-376.563	0.010597	0.033329	K0.03Na0.88Ca0.10Al1.10Si2.90O8	65.9882	0	21.191	0	0	0	0	2.08533	10.2711	0.464401	0	0
2000	935	0.026046	0.059993	-361.823	0.01018	0.032002	K0.03Na0.88Ca0.09Al1.09Si2.91O8	66.0907	0	21.121	0	0	0	0	2.00369	10.316	0.468646	0	0
2000	930	0.024989	0.057439	-347.264	0.009768	0.030693	K0.03Na0.88Ca0.09Al1.09Si2.91O8	66.1887	0	21.0539	0	0	0	0	1.92549	10.3586	0.473281	0	0
2000	925	0.023954	0.054946	-333.008	0.009364	0.029413	K0.03Na0.89Ca0.09Al1.09Si2.91O8	66.2825	0	20.9896	0	0	0	0	1.85054	10.399	0.478264	0	0
2000	920	0.022947	0.052526	-319.135	0.008972	0.028168	K0.03Na0.89Ca0.08Al1.08Si2.92O8	66.3723	0	20.9279	0	0	0	0	1.77869	10.4375	0.483563	0	0
2000	915	0.021973	0.050188	-305.696	0.008592	0.026963	K0.03Na0.89Ca0.08Al1.08Si2.92O8	66.4584	0	20.8687	0	0	0	0	1.70978	10.474	0.489152	0	0
2000	910	0.021033	0.047937	-292.723	0.008225	0.025801	K0.03Na0.89Ca0.08Al1.08Si2.92O8	66.5408	0	20.8119	0	0	0	0	1.64366	10.5086	0.495007	0	0
2000	905	0.020128	0.045775	-280.233	0.007872	0.024683	K0.03Na0.90Ca0.07Al1.07Si2.93O8	66.6198	0	20.7573	0	0	0	0	1.5802	10.5416	0.501113	0	0
2000	900	0.019258	0.043702	-268.23	0.007532	0.023609	K0.03Na0.90Ca0.07Al1.07Si2.93O8	66.6955	0	20.7049	0	0	0	0	1.51926	10.5729	0.507453	0	0
Title:	Allan	et	al.	1989	(see	Ghiorso	1997)
Phase	Masses:
Pressure	Temperature	mass	liquid_0	olivine_0	clinopyroxene_0	clinopyroxene_1	feldspar_0	spinel_0	whitlockite
2000	1400	100.201	100.201	0	0	0	0	0	0
2000	1400	100.201	100.201	0	0	0	0	0	0
2000	1395	100.201	100.201	0	0	0	0	0	0
2000	1390	100.201	100.201	0	0	0	0	0	0
2000	1385	100.201	100.201	0	0	0	0	0	0
2000	1380	100.201	100.201	0	0	0	0	0	0
2000	1375	100.201	100.201	0	0	0	0	0	0
2000	1370	100.201	100.201	0	0	0	0	0	0
2000	1365	100.201	100.201	0	0	0	0	0	0
2000	1360	100.202	100.202	0	0	0	0	0	0
2000	1355	100.202	100.202	0	0	0	0	0	0
2000	1350	100.202	100.202	0	0	0	0	0	0
2000	1345	100.202	100.202	0	0	0	0	0	0
2000	1340	100.202	100.202	0	0	0	0	0	0
2000	1335	100.202	100.202	0	0	0	0	0	0
2000	1330	100.202	100.202	0	0	0	0	0	0
2000	1325	100.202	100.202	0	0	0	0	0	0
2000	1320	100.203	100.203	0	0	0	0	0	0
2000	1315	100.203	100.203	0	0	0	0	0	0
2000	1310	100.203	100.203	0	0	0	0	0	0
2000	1305	100.203	100.203	0	0	0	0	0	0
2000	1300	100.203	100.203	0	0	0	0	0	0
2000	1295	100.203	100.203	0	0	0	0	0	0
2000	1290	100.203	100.203	0	0	0	0	0	0
2000	1285	100.204	100.204	0	0	0	0	0	0
2000	1280	100.204	100.204	0	0	0	0	0	0
2000	1275	100.204	100.204	0	0	0	0	0	0
2000	1270	100.204	100.204	0	0	0	0	0	0
2000	1265	100.204	100.204	0	0	0	0	0	0
2000	1260	100.205	100.205	0	0	0	0	0	0
2000	1255	100.205	100.205	0	0	0	0	0	0
2000	1250	100.205	100.205	0	0	0	0	0	0
2000	1245	100.205	99.5756	0	0	0	0.629681	0	0
2000	1240	99.5766	97.2289	0	0	0	2.34774	0	0
2000	1235	97.23	94.9858	0	0	0	2.24421	0	0
2000	1230	94.9838	88.093	1.81839	0	0	5.07243	0	0
2000	1225	88.0926	78.4651	1.24748	3.2719	0	5.10812	0	0
2000	1220	78.4661	69.5996	0.913041	3.56318	0	4.38772	0.00252	0
2000	1215	69.602	62.4402	0.719698	2.85654	0	3.57061	0.014888	0
2000	1210	62.4427	56.5492	0.582415	2.32397	0	2.97419	0.012931	0
2000	1205	56.5518	51.611	0.478274	1.92705	0	2.52392	0.011547	0
2000	1200	51.6138	47.4046	0.396719	1.62547	0	2.17641	0.010597	0
2000	1195	47.4074	43.7716	0.330417	1.39315	0	1.9023	0.01	0
2000	1190	43.7745	40.5944	0.2737	1.21429	0	1.68236	0.009727	0
2000	1185	40.5977	37.54	0	0.747281	0.716308	1.58333	0.010742	0
2000	1180	37.5433	34.8374	0	0.584595	0.68655	1.42384	0.010931	0
2000	1175	34.8408	32.4676	0	0.506654	0.594025	1.26066	0.011861	0
2000	1170	32.4711	30.3677	0	0.445045	0.517475	1.12704	0.013868	0
2000	1165	30.3714	28.4872	0	0.397002	0.453174	1.0165	0.017508	0
2000	1160	28.491	26.784	0	0.360813	0.398332	0.924354	0.023466	0
2000	1155	26.788	25.2211	0	0.33593	0.350798	0.847186	0.032893	0
2000	1150	25.2254	23.7555	0	0.326771	0.30864	0.783851	0.050672	0
2000	1145	23.762	22.0718	0	0.466884	0.261979	0.774826	0.186511	0
2000	1140	22.0898	18.9362	0	1.21086	0.169795	0.935029	0.837895	0
2000	1135	18.9517	16.5439	0	0.886453	0.138041	0.743455	0.639795	0
2000	1130	16.5564	14.7975	0	0.602615	0.12087	0.587984	0.4474	0
2000	1125	14.8081	13.4612	0	0.43013	0.106401	0.481495	0.328853	0
2000	1120	13.4706	12.3997	0	0.320298	0.09386	0.404635	0.252119	0
2000	1115	12.4081	11.5313	0	0.246993	0.083016	0.346833	0.19999	0
2000	1110	11.5392	10.7841	0	0.201416	0.076138	0.304926	0.166964	0.005673
2000	1105	10.7926	10.1136	0	0.171595	0.07216	0.27352	0.145015	0.016757
2000	1100	10.1216	9.54269	0	0.139162	0.063405	0.24176	0.120865	0.013764
2000	1095	9.55045	9.04696	0	0.115811	0.056278	0.216075	0.103137	0.012193
2000	1090	9.05447	8.61269	0	0.097786	0.049944	0.194395	0.08921	0.010443
2000	1085	8.61999	8.22818	0	0.083889	0.044501	0.176061	0.078301	0.00906
2000	1080	8.23532	7.88463	0	0.072972	0.039794	0.160356	0.069617	0.007957
2000	1075	7.89164	7.57527	0	0.06425	0.035694	0.14675	0.062611	0.007064
2000	1070	7.58218	7.29482	0	0.057181	0.0321	0.134842	0.056905	0.006329
2000	1065	7.30165	7.03906	0	0.05138	0.028931	0.124326	0.052228	0.005717
2000	1060	7.04582	6.80458	0	0.04657	0.026119	0.114965	0.048388	0.005203
2000	1055	6.81128	6.58855	0	0.042546	0.023607	0.106568	0.045246	0.004766
2000	1050	6.59522	6.38863	0	0.039157	0.021348	0.098981	0.042704	0.004392
2000	1045	6.39528	6.20284	0	0.036288	0.019301	0.09208	0.040699	0.004071
2000	1040	6.20948	6.02946	0	0.033857	0.017426	0.085757	0.039192	0.003793
2000	1035	6.03611	5.86697	0	0.031799	0.015687	0.079921	0.038177	0.003552
2000	1030	5.87365	5.71402	0	0.030072	0.014049	0.07449	0.037675	0.003343
2000	1025	5.72076	5.56934	0	0.028651	0.012469	0.069385	0.037748	0.003163
2000	1020	5.57616	5.43168	0	0.027526	0.010901	0.064536	0.038511	0.00301
2000	1015	5.43863	5.29974	0	0.026708	0.009281	0.059865	0.040152	0.002882
2000	1010	5.30688	5.1721	0	0.026232	0.007526	0.055275	0.042964	0.00278
2000	1005	5.17934	5.0439	0.010669	0.02426	0	0.052449	0.045286	0.002773
2000	1000	5.05147	4.91756	0.009493	0.023385	0	0.047679	0.050646	0.002708
2000	995	4.92553	4.79206	0.006665	0.023498	0	0.042954	0.057713	0.002649
2000	990	4.80044	4.66711	0.003464	0.023615	0	0.038817	0.064845	0.002589
2000	985	4.67573	4.54438	0.000569	0.023232	0	0.035856	0.069196	0.002502
2000	980	4.55249	4.42632	0	0.021216	0	0.034559	0.068002	0.002391
2000	975	4.43359	4.31517	0	0.018855	0	0.033925	0.063383	0.002259
2000	970	4.32212	4.21186	0	0.016976	0	0.033252	0.057912	0.002123
2000	965	4.21851	4.11628	0	0.015353	0	0.032493	0.052384	0.001997
2000	960	4.12265	4.02791	0	0.013974	0	0.031613	0.04727	0.001884
2000	955	4.03399	3.95111	0	0.008273	0	0.030636	0.042326	0.001645
2000	950	3.95701	3.87579	0	0.011246	0	0.029244	0.039044	0.001687
2000	945	3.88149	3.80585	0	0.010392	0	0.028189	0.035457	0.001608
2000	940	3.81139	3.74076	0	0.009652	0	0.027117	0.032323	0.001536
2000	935	3.74614	3.68005	0	0.009006	0	0.026046	0.029568	0.001472
2000	930	3.68531	3.62334	0	0.008436	0	0.024989	0.027134	0.001413
2000	925	3.62849	3.57027	0	0.007931	0	0.023954	0.024972	0.001358
2000	920	3.57532	3.52054	0	0.00748	0	0.022947	0.023045	0.001308
2000	915	3.52549	3.47386	0	0.007075	0	0.021973	0.02132	0.00126
2000	910	3.47874	3.43001	0	0.006709	0	0.021033	0.019771	0.001215
2000	905	3.43481	3.38876	0	0.006378	0	0.020128	0.018375	0.001172
2000	900	3.3935	3.34992	0	0.006076	0	0.019258	0.017113	0.001131
Title:	Allan	et	al.	1989	(see	Ghiorso	1997)
Phase	Volumes:
Pressure	Temperature	mass	V	liquid_0	olivine_0	clinopyroxene_0	clinopyroxene_1	feldspar_0	spinel_0	whitlockite
2000	1400	100.201	37.4021	37.4021	0	0	0	0	0	0
2000	1400	100.201	37.4021	37.4021	0	0	0	0	0	0
2000	1395	100.201	37.3896	37.3896	0	0	0	0	0	0
2000	1390	100.201	37.3771	37.3771	0	0	0	0	0	0
2000	1385	100.201	37.3646	37.3646	0	0	0	0	0	0
2000	1380	100.201	37.3521	37.3521	0	0	0	0	0	0
2000	1375	100.201	37.3397	37.3397	0	0	0	0	0	0
2000	1370	100.201	37.3272	37.3272	0	0	0	0	0	0
2000	1365	100.201	37.3147	37.3147	0	0	0	0	0	0
2000	1360	100.202	37.3023	37.3023	0	0	0	0	0	0
2000	1355	100.202	37.2898	37.2898	0	0	0	0	0	0
2000	1350	100.202	37.2774	37.2774	0	0	0	0	0	0
2000	1345	100.202	37.2649	37.2649	0	0	0	0	0	0
2000	1340	100.202	37.2525	37.2525	0	0	0	0	0	0
2000	1335	100.202	37.24	37.24	0	0	0	0	0	0
2000	1330	100.202	37.2276	37.2276	0	0	0	0	0	0
2000	1325	100.202	37.2152	37.2152	0	0	0	0	0	0
2000	1320	100.203	37.2027	37.2027	0	0	0	0	0	0
2000	1315	100.203	37.1903	37.1903	0	0	0	0	0	0
2000	1310	100.203	37.1779	37.1779	0	0	0	0	0	0
2000	1305	100.203	37.1655	37.1655	0	0	0	0	0	0
2000	1300	100.203	37.153	37.153	0	0	0	0	0	0
2000	1295	100.203	37.1406	37.1406	0	0	0	0	0	0
2000	1290	100.203	37.1282	37.1282	0	0	0	0	0	0
2000	1285	100.204	37.1158	37.1158	0	0	0	0	0	0
2000	1280	100.204	37.1034	37.1034	0	0	0	0	0	0
2000	1275	100.204	37.091	37.091	0	0	0	0	0	0
2000	1270	100.204	37.0786	37.0786	0	0	0	0	0	0
2000	1265	100.204	37.0663	37.0663	0	0	0	0	0	0
2000	1260	100.205	37.0539	37.0539	0	0	0	0	0	0
2000	1255	100.205	37.0415	37.0415	0	0	0	0	0	0
2000	1250	100.205	37.0291	37.0291	0	0	0	0	0	0
2000	1245	100.205	37.0081	36.7727	0	0	0	0.235345	0	0
2000	1240	99.5766	36.7283	35.8505	0	0	0	0.877855	0	0
2000	1235	97.23	35.8076	34.9681	0	0	0	0.839517	0	0
2000	1230	94.9838	34.8455	32.3851	0.561508	0	0	1.89889	0	0
2000	1225	88.0926	32.1075	28.7895	0.384042	1.01959	0	1.91436	0	0
2000	1220	78.4661	28.5156	25.4797	0.280148	1.10873	0	1.64641	0.00062	0
2000	1215	69.602	25.2583	22.8056	0.220096	0.887538	0	1.34146	0.003631	0
2000	1210	62.4427	22.6237	20.6033	0.177529	0.720996	0	1.11876	0.003126	0
2000	1205	56.5518	20.4509	18.7553	0.14531	0.596956	0	0.950547	0.002767	0
2000	1200	51.6138	18.6256	17.1795	0.12014	0.502769	0	0.820669	0.002515	0
2000	1195	47.4074	17.0675	15.8169	0.099737	0.430245	0	0.718178	0.002352	0
2000	1190	43.7745	15.7189	14.6239	0.082349	0.374412	0	0.635909	0.002267	0
2000	1185	40.5977	14.5231	13.4717	0	0.230077	0.219734	0.599143	0.002484	0
2000	1180	37.5433	13.3832	12.4513	0	0.179733	0.210255	0.539377	0.002509	0
2000	1175	34.8408	12.3738	11.5559	0	0.155551	0.181622	0.478078	0.002705	0
2000	1170	32.4711	11.4874	10.762	0	0.136443	0.157964	0.427861	0.003145	0
2000	1165	30.3714	10.7009	10.051	0	0.121542	0.138118	0.386312	0.003953	0
2000	1160	28.491	9.99598	9.40752	0	0.110306	0.121216	0.351664	0.005281	0
2000	1155	26.788	9.35742	8.81825	0	0.102551	0.106588	0.322648	0.007386	0
2000	1150	25.2254	8.77189	8.26844	0	0.099611	0.093636	0.298843	0.011358	0
2000	1145	23.762	8.21857	7.65967	0	0.142121	0.079351	0.295724	0.041707	0
2000	1140	22.0898	7.5797	6.6169	0	0.3682	0.051307	0.357312	0.185984	0
2000	1135	18.9517	6.5571	5.82074	0	0.269268	0.041616	0.284438	0.141037	0
2000	1130	16.5564	5.77755	5.23508	0	0.182855	0.036362	0.225205	0.098042	0
2000	1125	14.8081	5.20237	4.78375	0	0.130379	0.031944	0.184612	0.071688	0
2000	1120	13.4706	4.75803	4.42292	0	0.096986	0.028125	0.155297	0.054703	0
2000	1115	12.4081	4.40212	4.12613	0	0.074712	0.02483	0.133239	0.043207	0
2000	1110	11.5392	4.10832	3.86976	0	0.060862	0.022731	0.117248	0.035928	0.001785
2000	1105	10.7926	3.85407	3.63915	0	0.051795	0.021503	0.105266	0.031085	0.005274
2000	1100	10.1216	3.62603	3.44194	0	0.04196	0.018859	0.093123	0.025816	0.004332
2000	1095	9.55045	3.43075	3.27007	0	0.034882	0.016709	0.083298	0.021955	0.003837
2000	1090	9.05447	3.26046	3.11902	0	0.029422	0.014802	0.075	0.018931	0.003287
2000	1085	8.61999	3.1107	2.98492	0	0.025214	0.013166	0.067977	0.016566	0.002851
2000	1080	8.23532	2.97765	2.86484	0	0.02191	0.011752	0.061959	0.014687	0.002504
2000	1075	7.89164	2.85845	2.75652	0	0.019271	0.010523	0.056741	0.013173	0.002223
2000	1070	7.58218	2.75089	2.65821	0	0.017133	0.009447	0.052171	0.011942	0.001992
2000	1065	7.30165	2.65322	2.56847	0	0.015379	0.008499	0.048134	0.010933	0.001799
2000	1060	7.04582	2.56405	2.48618	0	0.013924	0.00766	0.044537	0.010105	0.001637
2000	1055	6.81128	2.48225	2.41039	0	0.012708	0.006911	0.041309	0.009428	0.0015
2000	1050	6.59522	2.4069	2.34032	0	0.011683	0.006239	0.03839	0.008879	0.001382
2000	1045	6.39528	2.33722	2.27532	0	0.010816	0.00563	0.035733	0.008444	0.001281
2000	1040	6.20948	2.27257	2.21481	0	0.01008	0.005074	0.033297	0.008116	0.001194
2000	1035	6.03611	2.21239	2.15832	0	0.009458	0.00456	0.031047	0.00789	0.001118
2000	1030	5.87365	2.15621	2.10543	0	0.008935	0.004077	0.028952	0.007772	0.001052
2000	1025	5.72076	2.10361	2.05574	0	0.008503	0.003612	0.026981	0.007774	0.000996
2000	1020	5.57616	2.05422	2.00893	0	0.008161	0.003152	0.025106	0.007918	0.000947
2000	1015	5.43863	2.00769	1.96465	0	0.007911	0.002679	0.0233	0.008243	0.000907
2000	1010	5.30688	1.96371	1.92257	0	0.007762	0.002169	0.021522	0.008807	0.000875
2000	1005	5.17934	1.92196	1.88146	0.002754	0.007173	0	0.020429	0.00927	0.000873
2000	1000	5.05147	1.88112	1.84199	0.002442	0.006909	0	0.018577	0.010354	0.000852
2000	995	4.92553	1.84201	1.80401	0.00171	0.006938	0	0.016742	0.011785	0.000834
2000	990	4.80044	1.80438	1.76735	0.000887	0.006968	0	0.015135	0.013228	0.000815
2000	985	4.67573	1.768	1.73212	0.000145	0.006853	0	0.013985	0.014102	0.000787
2000	980	4.55249	1.73277	1.69843	0	0.006257	0	0.013483	0.013847	0.000752
2000	975	4.43359	1.69893	1.66652	0	0.00556	0	0.013239	0.012896	0.000711
2000	970	4.32212	1.667	1.63657	0	0.005004	0	0.01298	0.011774	0.000668
2000	965	4.21851	1.63702	1.60854	0	0.004525	0	0.012687	0.010642	0.000628
2000	960	4.12265	1.60895	1.5823	0	0.004118	0	0.012346	0.009596	0.000593
2000	955	4.03399	1.5829	1.55939	0	0.002446	0	0.011966	0.008587	0.000518
2000	950	3.95701	1.5598	1.5366	0	0.003325	0	0.011424	0.007916	0.000531
2000	945	3.88149	1.53701	1.51523	0	0.003073	0	0.011014	0.007184	0.000506
2000	940	3.81139	1.51562	1.49515	0	0.002854	0	0.010597	0.006544	0.000484
2000	935	3.74614	1.49554	1.47625	0	0.002663	0	0.01018	0.005983	0.000463
2000	930	3.68531	1.47664	1.45845	0	0.002494	0	0.009768	0.005487	0.000445
2000	925	3.62849	1.45885	1.44167	0	0.002344	0	0.009364	0.005046	0.000428
2000	920	3.57532	1.44207	1.42582	0	0.00221	0	0.008972	0.004654	0.000412
2000	915	3.52549	1.42624	1.41086	0	0.00209	0	0.008592	0.004303	0.000397
2000	910	3.47874	1.41128	1.3967	0	0.001982	0	0.008225	0.003988	0.000382
2000	905	3.43481	1.39714	1.38331	0	0.001883	0	0.007872	0.003704	0.000369
2000	900	3.3935	1.38375	1.37062	0	0.001794	0	0.007532	0.003448	0.000356
Title:	Allan	et	al.	1989	(see	Ghiorso	1997)
Solid	Composition:
Pressure	Temperature	mass	SiO2	TiO2	Al2O3	Fe2O3	Cr2O3	FeO	MgO	CaO	Na2O	K2O	P2O5	H2O
2000	1400	0	---
2000	1400	0	---
2000	1395	0	---
2000	1390	0	---
2000	1385	0	---
2000	1380	0	---
2000	1375	0	---
2000	1370	0	---
2000	1365	0	---
2000	1360	0	---
2000	1355	0	---
2000	1350	0	---
2000	1345	0	---
2000	1340	0	---
2000	1335	0	---
2000	1330	0	---
2000	1325	0	---
2000	1320	0	---
2000	1315	0	---
2000	1310	0	---
2000	1305	0	---
2000	1300	0	---
2000	1295	0	---
2000	1290	0	---
2000	1285	0	---
2000	1280	0	---
2000	1275	0	---
2000	1270	0	---
2000	1265	0	---
2000	1260	0	---
2000	1255	0	---
2000	1250	0	---
2000	1245	0.629681	48.0025	0	33.4092	0	0	0	0	16.3622	2.22241	0.00374561	0	0
2000	1240	2.34774	48.1839	0	33.2869	0	0	0	0	16.219	2.30616	0.00402674	0	0
2000	1235	2.24421	48.3707	0	33.161	0	0	0	0	16.0716	2.39238	0.00432954	0	0
2000	1230	6.89083	46.4055	0	24.2708	0	0	3.52703	12.136	11.8006	1.85653	0.00362041	0	0
2000	1225	9.62749	48.7168	0.111949	18.9996	0.440356	0	3.44601	11.8057	14.9713	1.5052	0.0030779	0	0
2000	1220	8.86646	49.272	0.149816	17.9827	0.543287	0.00711846	3.58097	11.6094	15.3237	1.52759	0.00340087	0	0
2000	1215	7.16173	49.3814	0.168624	17.9815	0.580761	0.0521907	3.76157	11.4063	15.0184	1.64521	0.00401626	0	0
2000	1210	5.89351	49.5704	0.184364	17.9918	0.595115	0.0549337	3.92288	11.1906	14.7136	1.77162	0.0047244	0	0
2000	1205	4.94078	49.7698	0.199802	18.0021	0.609261	0.0579818	4.0794	10.9703	14.4053	1.90053	0.00551929	0	0
2000	1200	4.2092	49.9821	0.214926	18.0115	0.623661	0.0613654	4.23146	10.7441	14.0926	2.03184	0.00641216	0	0
2000	1195	3.63587	50.2112	0.229785	18.0171	0.639079	0.0651322	4.37989	10.5109	13.7745	2.16499	0.00741436	0	0
2000	1190	3.18008	50.4652	0.244465	18.0144	0.656773	0.0693268	4.52592	10.2683	13.4483	2.29885	0.00853713	0	0
2000	1185	3.05767	51.9466	0.256764	17.761	0.75262	0.0742568	4.79137	9.63401	12.4242	2.34965	0.00955742	0	0
2000	1180	2.70592	52.1104	0.27638	17.8206	0.769447	0.0775302	4.94879	9.48189	12.0195	2.48439	0.0110805	0	0
2000	1175	2.37321	52.2185	0.314171	17.8158	0.810155	0.0837336	5.02954	9.26303	11.8425	2.60988	0.0127238	0	0
2000	1170	2.10342	52.2967	0.366493	17.7998	0.86563	0.0913531	5.12116	9.04659	11.6629	2.73489	0.0145647	0	0
2000	1165	1.88419	52.3182	0.44559	17.7604	0.946513	0.0994547	5.24158	8.83473	11.4801	2.85674	0.0166145	0	0
2000	1160	1.70697	52.2449	0.570599	17.6802	1.06688	0.104401	5.41818	8.63059	11.2941	2.97126	0.0188744	0	0
2000	1155	1.56681	52.0151	0.772498	17.5317	1.24873	0.0994525	5.69574	8.43954	11.1045	3.07141	0.0213208	0	0
2000	1150	1.46993	51.4279	1.14094	17.2293	1.5694	0.0761301	6.2105	8.28036	10.9066	3.135	0.0237994	0	0
2000	1145	1.6902	47.2394	3.01414	15.4275	3.34473	0.0252346	9.06484	8.45387	10.5902	2.81665	0.0233314	0	0
2000	1140	3.15358	38.4822	6.50981	11.6149	7.27631	0	15.1207	8.94319	10.0712	1.96386	0.0177655	0	0
2000	1135	2.40774	38.7626	6.23269	11.6514	7.61587	0	15.3371	8.509	9.77305	2.09689	0.0214186	0	0
2000	1130	1.75887	39.707	5.72393	12.0057	7.6443	0	15.0402	8.05155	9.4866	2.31418	0.0264265	0	0
2000	1125	1.34688	40.5745	5.27081	12.3252	7.67667	0	14.7368	7.64807	9.21281	2.52331	0.0318347	0	0
2000	1120	1.07091	41.3449	4.87371	12.5935	7.72826	0	14.4557	7.29205	8.95493	2.71936	0.0375614	0	0
2000	1115	0.876831	42.0237	4.52469	12.8122	7.80283	0	14.2036	6.9751	8.71248	2.90192	0.0435736	0	0
2000	1110	0.755117	42.2277	4.1968	12.7965	7.87932	0	13.9562	6.69298	8.83602	3.0216	0.0490802	0.34377	0
2000	1105	0.679047	41.8918	3.86804	12.5449	7.9285	0	13.6672	6.41816	9.42299	3.07518	0.0539213	1.12929	0
2000	1100	0.578956	42.4589	3.60132	12.7216	8.05153	0	13.4539	6.15289	9.1673	3.24342	0.0612361	1.08791	0
2000	1095	0.503494	42.8851	3.35962	12.8275	8.19544	0	13.2666	5.91183	8.98732	3.38978	0.068631	1.10818	0
2000	1090	0.441779	43.3042	3.14242	12.9265	8.36827	0	13.1097	5.68976	8.76894	3.53203	0.0764174	1.08175	0
2000	1085	0.391812	43.6631	2.94394	12.9957	8.56659	0	12.9776	5.48476	8.56262	3.66304	0.0844181	1.05813	0
2000	1080	0.350696	43.9642	2.76099	13.038	8.79122	0	12.8687	5.29439	8.36842	3.78322	0.0926027	1.03834	0
2000	1075	0.316368	44.2099	2.59105	13.0561	9.04405	0	12.7818	5.11667	8.18484	3.89299	0.10094	1.02175	0
2000	1070	0.287356	44.401	2.43211	13.052	9.32798	0	12.7165	4.94995	8.0106	3.99255	0.109388	1.00789	0
2000	1065	0.262583	44.5366	2.28248	13.027	9.64713	0	12.6732	4.79281	7.84461	4.08189	0.117898	0.996386	0
2000	1060	0.241244	44.614	2.14075	12.9816	10.0071	0	12.6526	4.64404	7.68586	4.16075	0.126405	0.986903	0
2000	1055	0.222732	44.6282	2.00566	12.9158	10.4154	0	12.6564	4.50249	7.53336	4.22865	0.134831	0.979172	0
2000	1050	0.206583	44.572	1.87607	12.8288	10.8822	0	12.6869	4.36708	7.38613	4.28479	0.143077	0.972947	0
2000	1045	0.192438	44.4347	1.75092	12.719	11.4209	0	12.7477	4.23672	7.24311	4.32798	0.151016	0.968001	0
2000	1040	0.180025	44.2013	1.62915	12.5837	12.0497	0	12.8437	4.11025	7.10311	4.35655	0.158487	0.964105	0
2000	1035	0.169136	43.8508	1.50965	12.419	12.7935	0	12.9816	3.98636	6.96469	4.36811	0.165282	0.961017	0
2000	1030	0.159629	43.3539	1.39114	12.219	13.6869	0	13.1708	3.86345	6.826	4.3593	0.171124	0.958453	0
2000	1025	0.151417	42.6688	1.27213	11.9752	14.778	0	13.4247	3.7395	6.68463	4.32538	0.175647	0.956061	0
2000	1020	0.144483	41.7377	1.15068	11.6762	16.1341	0	13.761	3.61167	6.53716	4.25987	0.178364	0.95334	0
2000	1015	0.138889	40.4803	1.02427	11.306	17.8486	0	14.2038	3.47602	6.37886	4.15388	0.17863	0.949585	0
2000	1010	0.134777	38.7888	0.889888	10.8433	20.0465	0	14.7854	3.32755	6.20379	3.99535	0.175601	0.943872	0
2000	1005	0.135438	36.4175	0.705113	10.1846	21.2828	0	17.4348	3.51749	5.56119	3.78968	0.169739	0.937011	0
2000	1000	0.13391	33.9764	0.564224	9.55531	24.4421	0	18.205	3.3143	5.33666	3.52193	0.158812	0.925242	0
2000	995	0.133479	31.2022	0.41983	8.90361	28.3152	0	18.6645	3.02073	5.19512	3.22542	0.145123	0.908266	0
2000	990	0.13333	28.542	0.281166	8.32357	32.1767	0	18.9274	2.71039	5.05957	2.95874	0.131914	0.888544	0
2000	985	0.131355	26.698	0.168482	7.96503	35.1056	0	18.8851	2.42669	4.94768	2.80823	0.123721	0.871497	0
2000	980	0.126168	26.2305	0.092062	7.91595	36.0826	0	18.8128	2.26659	4.77385	2.83454	0.123926	0.867135	0
2000	975	0.118422	26.6467	0.0485114	8.07186	35.9454	0	18.5215	2.14471	4.64455	2.97427	0.129404	0.873068	0
2000	970	0.110263	27.4141	0.0254205	8.27375	35.3659	0	18.121	2.05385	4.58578	3.1429	0.136219	0.881037	0
2000	965	0.102226	28.3354	0.0134232	8.49892	34.5825	0	17.6721	1.97635	4.5584	3.32536	0.143834	0.893761	0
2000	960	0.094741	29.2836	0.00719019	8.71775	33.7405	0	17.2251	1.90997	4.54946	3.5051	0.151546	0.909848	0
2000	955	0.082879	29.2978	0	9.40458	34.2926	0	16.8049	1.52555	3.78586	3.81252	0.168031	0.908138	0
2000	950	0.08122	30.6617	0	9.15308	32.415	0	16.5317	1.84958	4.51098	3.76278	0.16465	0.950486	0
2000	945	0.075645	31.4808	0	9.32119	31.6467	0	16.1609	1.80694	4.52989	3.90942	0.171638	0.972499	0
2000	940	0.070628	32.2331	0	9.46762	30.9367	0	15.8241	1.76943	4.5521	4.04316	0.1783	0.995444	0
2000	935	0.066092	32.9261	0	9.59533	30.2785	0	15.5172	1.73626	4.57732	4.16544	0.184686	1.0191	0
2000	930	0.061971	33.5659	0	9.70671	29.6667	0	15.2372	1.70673	4.60521	4.27744	0.19084	1.04328	0
2000	925	0.058215	34.1577	0	9.80367	29.0969	0	14.9812	1.68031	4.63549	4.38011	0.196791	1.06777	0
2000	920	0.05478	34.7057	0	9.88783	28.5655	0	14.7473	1.65652	4.66785	4.47428	0.202565	1.09239	0
2000	915	0.051628	35.2136	0	9.96055	28.0694	0	14.5337	1.63498	4.70201	4.56064	0.208183	1.11693	0
2000	910	0.048728	35.6847	0	10.023	27.6059	0	14.3387	1.61534	4.73766	4.63981	0.213662	1.14119	0
2000	905	0.046053	36.1218	0	10.0761	27.1728	0	14.1612	1.59732	4.77452	4.71231	0.219015	1.16497	0
2000	900	0.043579	36.5274	0	10.1207	26.7681	0	13.9999	1.58066	4.81229	4.77863	0.224255	1.18803	0
Title:	Allan	et	al.	1989	(see	Ghiorso	1997)
Bulk	Composition:
Pressure	Temperature	mass	SiO2	TiO2	Al2O3	Fe2O3	Cr2O3	FeO	MgO	CaO	Na2O	K2O	P2O5	H2O
2000	1400	100.201	48.5824	1.00798	17.6046	1.29477	0.0299399	7.20896	9.08176	12.425	2.64469	0.0299399	0.0798397	0.00997996
2000	1400	100.201	48.5824	1.00798	17.6046	1.29477	0.0299399	7.20896	9.08176	12.425	2.64469	0.0299399	0.0798397	0.00997996
2000	1395	100.201	48.5824	1.00798	17.6046	1.29554	0.0299399	7.20827	9.08176	12.425	2.64469	0.0299399	0.0798396	0.00997995
2000	1390	100.201	48.5824	1.00797	17.6046	1.29634	0.0299398	7.20754	9.08175	12.425	2.64469	0.0299398	0.0798395	0.00997994
2000	1385	100.201	48.5823	1.00797	17.6046	1.29718	0.0299398	7.20678	9.08174	12.425	2.64468	0.0299398	0.0798395	0.00997993
2000	1380	100.201	48.5823	1.00797	17.6046	1.29806	0.0299398	7.20598	9.08173	12.425	2.64468	0.0299398	0.0798394	0.00997993
2000	1375	100.201	48.5822	1.00797	17.6046	1.29898	0.0299397	7.20514	9.08172	12.425	2.64468	0.0299397	0.0798393	0.00997992
2000	1370	100.201	48.5822	1.00797	17.6046	1.29994	0.0299397	7.20427	9.08172	12.425	2.64468	0.0299397	0.0798393	0.00997991
2000	1365	100.201	48.5821	1.00797	17.6045	1.30095	0.0299397	7.20336	9.08171	12.425	2.64467	0.0299397	0.0798392	0.0099799
2000	1360	100.202	48.5821	1.00797	17.6045	1.30199	0.0299397	7.20241	9.0817	12.425	2.64467	0.0299397	0.0798391	0.00997989
2000	1355	100.202	48.582	1.00797	17.6045	1.30308	0.0299396	7.20142	9.08169	12.4249	2.64467	0.0299396	0.079839	0.00997988
2000	1350	100.202	48.582	1.00797	17.6045	1.30421	0.0299396	7.20039	9.08168	12.4249	2.64466	0.0299396	0.0798389	0.00997986
2000	1345	100.202	48.5819	1.00797	17.6045	1.30538	0.0299396	7.19933	9.08167	12.4249	2.64466	0.0299396	0.0798388	0.00997985
2000	1340	100.202	48.5819	1.00796	17.6044	1.3066	0.0299395	7.19822	9.08166	12.4249	2.64466	0.0299395	0.0798387	0.00997984
2000	1335	100.202	48.5818	1.00796	17.6044	1.30787	0.0299395	7.19707	9.08164	12.4249	2.64465	0.0299395	0.0798386	0.00997983
2000	1330	100.202	48.5817	1.00796	17.6044	1.30918	0.0299394	7.19588	9.08163	12.4249	2.64465	0.0299394	0.0798385	0.00997981
2000	1325	100.202	48.5817	1.00796	17.6044	1.31053	0.0299394	7.19465	9.08162	12.4249	2.64465	0.0299394	0.0798384	0.0099798
2000	1320	100.203	48.5816	1.00796	17.6043	1.31194	0.0299394	7.19338	9.08161	12.4248	2.64464	0.0299394	0.0798383	0.00997979
2000	1315	100.203	48.5815	1.00796	17.6043	1.31339	0.0299393	7.19206	9.08159	12.4248	2.64464	0.0299393	0.0798382	0.00997977
2000	1310	100.203	48.5815	1.00796	17.6043	1.31488	0.0299393	7.1907	9.08158	12.4248	2.64464	0.0299393	0.0798381	0.00997976
2000	1305	100.203	48.5814	1.00795	17.6043	1.31643	0.0299392	7.1893	9.08157	12.4248	2.64463	0.0299392	0.0798379	0.00997974
2000	1300	100.203	48.5813	1.00795	17.6042	1.31803	0.0299392	7.18784	9.08155	12.4248	2.64463	0.0299392	0.0798378	0.00997973
2000	1295	100.203	48.5812	1.00795	17.6042	1.31967	0.0299391	7.18635	9.08154	12.4247	2.64462	0.0299391	0.0798377	0.00997971
2000	1290	100.203	48.5811	1.00795	17.6042	1.32137	0.0299391	7.18481	9.08152	12.4247	2.64462	0.0299391	0.0798375	0.00997969
2000	1285	100.204	48.5811	1.00795	17.6041	1.32312	0.029939	7.18322	9.0815	12.4247	2.64461	0.029939	0.0798374	0.00997967
2000	1280	100.204	48.581	1.00795	17.6041	1.32493	0.029939	7.18158	9.08149	12.4247	2.64461	0.029939	0.0798373	0.00997966
2000	1275	100.204	48.5809	1.00794	17.6041	1.32678	0.0299389	7.17989	9.08147	12.4246	2.6446	0.0299389	0.0798371	0.00997964
2000	1270	100.204	48.5808	1.00794	17.604	1.32869	0.0299389	7.17816	9.08145	12.4246	2.6446	0.0299389	0.079837	0.00997962
2000	1265	100.204	48.5807	1.00794	17.604	1.33066	0.0299388	7.17637	9.08144	12.4246	2.64459	0.0299388	0.0798368	0.0099796
2000	1260	100.205	48.5806	1.00794	17.604	1.33268	0.0299387	7.17454	9.08142	12.4246	2.64459	0.0299387	0.0798366	0.00997958
2000	1255	100.205	48.5805	1.00794	17.6039	1.33476	0.0299387	7.17265	9.0814	12.4246	2.64458	0.0299387	0.0798365	0.00997956
2000	1250	100.205	48.5804	1.00793	17.6039	1.33689	0.0299386	7.17071	9.08138	12.4245	2.64458	0.0299386	0.0798363	0.00997954
2000	1245	100.205	48.5803	1.00793	17.6039	1.33872	0.0299386	7.16905	9.08136	12.4245	2.64457	0.0299386	0.0798361	0.00997952
2000	1240	99.5766	48.5839	1.01429	17.5041	1.34798	0.0301275	7.21358	9.13869	12.3996	2.64724	0.0301039	0.0803401	0.0100425
2000	1235	97.23	48.5935	1.03877	17.1231	1.38136	0.0308547	7.38692	9.35925	12.3074	2.65547	0.0307333	0.0822792	0.0102849
2000	1230	94.9838	48.6003	1.06334	16.7449	1.38297	0.0315843	7.58955	9.58058	12.2189	2.66176	0.0313578	0.0842249	0.0105281
2000	1225	88.0926	48.7732	1.14652	16.1566	1.46424	0.0340551	7.93173	9.38125	12.2519	2.72479	0.0335277	0.0908135	0.0113517
2000	1220	78.4661	48.7813	1.27345	15.8081	1.56406	0.0382331	8.50547	9.08446	11.9185	2.87443	0.0372634	0.101955	0.0127444
2000	1215	69.602	48.7192	1.41657	15.5316	1.67018	0.0425553	9.15462	8.76364	11.4849	3.04595	0.0415759	0.114939	0.0143674
2000	1210	62.4427	48.6436	1.55967	15.251	1.77115	0.0418505	9.79508	8.46144	11.0797	3.20654	0.0458822	0.128117	0.0160147
2000	1205	56.5518	48.5472	1.70297	14.9658	1.86969	0.0409278	10.429	8.17798	10.701	3.35599	0.0501695	0.141463	0.0176829
2000	1200	51.6138	48.4303	1.84683	14.6756	1.96631	0.0397738	11.0589	7.9117	10.3465	3.49521	0.0544412	0.154997	0.0193747
2000	1195	47.4074	48.2926	1.99169	14.3798	2.06152	0.0383685	11.6871	7.6613	10.014	3.62501	0.0587026	0.16875	0.0210937
2000	1190	43.7745	48.1333	2.138	14.0781	2.15581	0.036684	12.316	7.42575	9.70166	3.74613	0.062959	0.182755	0.0228443
2000	1185	40.5977	47.9503	2.28628	13.77	2.25508	0.0346824	12.943	7.20424	9.40816	3.85931	0.0672173	0.197056	0.0246319
2000	1180	37.5433	47.6247	2.45155	13.4453	2.35964	0.0320193	13.6233	7.0071	9.16268	3.98205	0.0719078	0.213087	0.0266359
2000	1175	34.8408	47.2761	2.62049	13.1058	2.46683	0.0290324	14.312	6.81566	8.94095	4.09812	0.0766256	0.229616	0.028702
2000	1170	32.4711	46.9146	2.7891	12.7617	2.5736	0.0255472	15.0037	6.63759	8.72904	4.2066	0.0812884	0.246373	0.0307966
2000	1165	30.3714	46.5414	2.95697	12.413	2.68047	0.0214429	15.6988	6.47156	8.52599	4.3082	0.0859006	0.263406	0.0329258
2000	1160	28.491	46.1587	3.12321	12.0594	2.78801	0.0166566	16.3971	6.31611	8.33075	4.40382	0.0904724	0.280791	0.0350989
2000	1155	26.788	45.7698	3.28609	11.7011	2.89708	0.0113464	17.0974	6.16946	8.14201	4.49467	0.0950226	0.298642	0.0373302
2000	1150	25.2254	45.3804	3.44248	11.3388	3.01104	0.00605983	17.7951	6.02926	7.95801	4.58254	0.0995858	0.31714	0.0396425
2000	1145	23.762	45.0004	3.58489	10.9731	3.206	0.00181652	18.4145	5.89028	7.77489	4.67109	0.104249	0.336672	0.042084
2000	1140	22.0898	44.7995	3.62677	10.6252	3.8276	0	18.5476	5.69136	7.55469	4.80947	0.110357	0.362158	0.0452697
2000	1135	18.9517	45.8225	3.14535	10.454	3.85403	0	18.5646	5.14793	7.13158	5.27941	0.125678	0.422126	0.0527658
2000	1130	16.5564	46.8242	2.69541	10.2745	3.81682	0	18.5641	4.65781	6.74409	5.73867	0.14075	0.483197	0.0603996
2000	1125	14.8081	47.6468	2.33527	10.0641	3.80607	0	18.574	4.25416	6.41576	6.1418	0.154233	0.540244	0.0675305
2000	1120	13.4706	48.3327	2.04174	9.83396	3.81468	0	18.5937	3.91485	6.13407	6.49987	0.166371	0.593886	0.0742358
2000	1115	12.4081	48.9156	1.79759	9.59215	3.83668	0	18.6201	3.62386	5.88903	6.82232	0.177383	0.644738	0.0805922
2000	1110	11.5392	49.4196	1.59085	9.34416	3.87326	0	18.6452	3.37005	5.67323	7.11621	0.187438	0.693288	0.086661
2000	1105	10.7926	49.8987	1.40902	9.09868	3.91789	0	18.6731	3.13838	5.45543	7.3978	0.196982	0.721436	0.092656
2000	1100	10.1216	50.4118	1.24471	8.86382	3.9533	0	18.7276	2.91948	5.19334	7.68268	0.206436	0.698018	0.0987981
2000	1095	9.55045	50.8698	1.10265	8.62653	3.99431	0	18.7799	2.72486	4.95714	7.9464	0.215086	0.678607	0.104707
2000	1090	9.05447	51.2894	0.978041	8.3897	4.03816	0	18.8303	2.54929	4.73829	8.1941	0.223069	0.659211	0.110443
2000	1085	8.61999	51.6739	0.868094	8.15414	4.08457	0	18.8758	2.3902	4.5375	8.42707	0.230416	0.642306	0.116009
2000	1080	8.23532	52.0298	0.770371	7.92093	4.13284	0	18.9152	2.24502	4.35229	8.64746	0.237185	0.627521	0.121428
2000	1075	7.89164	52.3624	0.682992	7.69084	4.18243	0	18.9473	2.11174	4.18057	8.85704	0.243425	0.614506	0.126716
2000	1070	7.58218	52.6763	0.604488	7.46443	4.233	0	18.971	1.98876	4.02071	9.05727	0.249177	0.602989	0.131888
2000	1065	7.30165	52.9749	0.533685	7.24214	4.28425	0	18.9854	1.87477	3.87133	9.24936	0.254478	0.592758	0.136955
2000	1060	7.04582	53.2616	0.469634	7.02431	4.33601	0	18.9891	1.76871	3.73132	9.43436	0.259359	0.583642	0.141928
2000	1055	6.81128	53.5394	0.411558	6.81121	4.38814	0	18.9809	1.66969	3.59972	9.61322	0.263852	0.575504	0.146815
2000	1050	6.59522	53.8109	0.358811	6.60307	4.44056	0	18.9594	1.57696	3.47573	9.78676	0.267985	0.568228	0.151625
2000	1045	6.39528	54.0788	0.310854	6.40012	4.49328	0	18.9227	1.48988	3.35864	9.9558	0.271788	0.561719	0.156365
2000	1040	6.20948	54.3462	0.267233	6.20257	4.54634	0	18.8686	1.4079	3.24784	10.1211	0.275291	0.555897	0.161044
2000	1035	6.03611	54.6159	0.227568	6.01064	4.5999	0	18.7943	1.33054	3.1428	10.2835	0.278527	0.550691	0.16567
2000	1030	5.87365	54.8916	0.191538	5.82458	4.65426	0	18.696	1.25739	3.04302	10.4438	0.28153	0.54604	0.170252
2000	1025	5.72076	55.1775	0.158879	5.64471	4.70993	0	18.5688	1.18807	2.94805	10.603	0.284344	0.541889	0.174802
2000	1020	5.57616	55.479	0.129378	5.47141	4.76773	0	18.4059	1.12225	2.85747	10.7623	0.287016	0.538186	0.179335
2000	1015	5.43863	55.8033	0.102883	5.30517	4.82904	0	18.1976	1.05963	2.77088	10.9232	0.289609	0.534884	0.18387
2000	1010	5.30688	56.1601	0.0793049	5.14667	4.89589	0	17.9301	0.999954	2.68786	11.0876	0.292202	0.531934	0.188435
2000	1005	5.17934	56.5653	0.0586463	4.99701	4.9396	0	17.6124	0.943012	2.60808	11.2586	0.294911	0.529306	0.193075
2000	1000	5.05147	57.0499	0.0416473	4.85599	5.01354	0	17.1546	0.87787	2.53988	11.444	0.297912	0.526641	0.197962
2000	995	4.92553	57.6148	0.0276789	4.72602	5.09362	0	16.5759	0.815477	2.47501	11.643	0.301302	0.524242	0.203024
2000	990	4.80044	58.2793	0.0169314	4.60737	5.15622	0	15.8769	0.757995	2.41072	11.8588	0.305212	0.522182	0.208314
2000	985	4.67573	59.0513	0.00949078	4.49878	5.16445	0	15.0859	0.706208	2.34682	12.093	0.309688	0.520559	0.21387
2000	980	4.55249	59.9089	0.00495768	4.39672	5.08306	0	14.2674	0.659384	2.28406	12.3417	0.314601	0.519558	0.21966
2000	975	4.43359	60.795	0.00250988	4.29545	4.94429	0	13.4627	0.615011	2.22631	12.5944	0.319614	0.519136	0.225551
2000	970	4.32212	61.6594	0.00126673	4.19124	4.78617	0	12.6984	0.574586	2.17375	12.8402	0.324415	0.519191	0.231368
2000	965	4.21851	62.4847	0.000645058	4.08421	4.62236	0	11.9838	0.537524	2.12499	13.076	0.32893	0.519762	0.237051
2000	960	4.12265	63.2631	0.000333667	3.9748	4.46151	0	11.3205	0.503553	2.07949	13.3003	0.333122	0.520786	0.242563
2000	955	4.03399	63.9945	0	3.86387	4.30159	0	10.7108	0.472325	2.03687	13.513	0.336997	0.522208	0.247894
2000	950	3.95701	64.6551	0	3.74873	4.16357	0	10.1476	0.452297	2.01616	13.6988	0.340148	0.524911	0.252716
2000	945	3.88149	65.3013	0	3.63689	4.02251	0	9.61636	0.42516	1.98033	13.8893	0.343438	0.527024	0.257633
2000	940	3.81139	65.9082	0	3.52562	3.88883	0	9.12248	0.399912	1.94656	14.0701	0.34647	0.529423	0.262372
2000	935	3.74614	66.4794	0	3.41543	3.76178	0	8.66222	0.376336	1.91469	14.2419	0.349266	0.532091	0.266941
2000	930	3.68531	67.0179	0	3.3067	3.64075	0	8.23236	0.354252	1.88461	14.4052	0.351846	0.535015	0.271347
2000	925	3.62849	67.5263	0	3.19974	3.52524	0	7.83011	0.333512	1.8562	14.5608	0.354228	0.538187	0.275597
2000	920	3.57532	68.0071	0	3.0948	3.41481	0	7.45305	0.313991	1.82937	14.7092	0.356425	0.541604	0.279696
2000	915	3.52549	68.4621	0	2.99206	3.3091	0	7.09903	0.295582	1.80404	14.8507	0.358452	0.545265	0.283648
2000	910	3.47874	68.8933	0	2.89167	3.20778	0	6.76615	0.278195	1.78014	14.9859	0.360321	0.549172	0.287461
2000	905	3.43481	69.3021	0	2.79373	3.11057	0	6.45272	0.26175	1.75762	15.115	0.362041	0.553328	0.291137
2000	900	3.3935	69.6902	0	2.69833	3.01722	0	6.15724	0.246179	1.73643	15.2384	0.363625	0.55774	0.294681
