# Supplementary material for: A 5-km-thick reservoir with > 380,000 km3 of magma within the ancient Earth's crust
Source: Sci Rep. 2022 Sep 19;12:15651. doi: 10.1038/s41598-022-19915-w (PMC9485162; doi:10.1038/s41598-022-19915-w)
Supplement: Supplementary file 10 — Supplementary Information 10. [file 41598_2022_19915_MOESM10_ESM.xlsx]

## Sheet: alphaMELTS_tbl
SupplTable S2B: Fractional cryustallization of wet MORB tholeiite at 2 kbar
MORB composition from Allan et al. (1989), see Ghiorso et al. (1997)
System	Thermodynamic	Data:
Pressure	Temperature	mass	F	phi	S	H	V	dVdP*10^6	dVdT*10^6	Cp	logfO2(absolute)	logfO2-QFM	rhol	rhos	viscosity	aH2O	chisqr
2000	1400	101.19	1	1	299.037	-1.21887e+06	39.173	-343.788	3695.71	155.607	-6.318	0	2.58315	0	1.23	0.124365	0
2000	1400	101.19	1	1	299.037	-1.21887e+06	39.173	-343.788	3695.71	155.607	-6.318	0	2.58315	0	1.23	0.124365	0
2000	1395	101.19	1	1	298.572	-1.21965e+06	39.1546	-343.302	3694.97	155.605	-6.362	0	2.58437	0	1.246	0.124275	0
2000	1390	101.19	1	1	298.105	-1.22043e+06	39.1362	-342.817	3694.2	155.603	-6.406	0	2.58559	0	1.262	0.124185	0
2000	1385	101.19	1	1	297.637	-1.22121e+06	39.1178	-342.332	3693.42	155.601	-6.45	0	2.58681	0	1.279	0.124096	0
2000	1380	101.19	1	1	297.167	-1.22199e+06	39.0994	-341.848	3692.62	155.599	-6.495	0	2.58802	0	1.295	0.124007	0
2000	1375	101.19	1	1	296.696	-1.22276e+06	39.0811	-341.364	3691.81	155.597	-6.54	0	2.58924	0	1.311	0.123918	0
2000	1370	101.19	1	1	296.223	-1.22354e+06	39.0627	-340.881	3690.99	155.595	-6.585	0	2.59046	0	1.328	0.12383	0
2000	1365	101.191	1	1	295.749	-1.22432e+06	39.0443	-340.398	3690.14	155.593	-6.63	0	2.59169	0	1.345	0.123742	0
2000	1360	101.191	1	1	295.274	-1.2251e+06	39.026	-339.916	3689.29	155.592	-6.676	0	2.59291	0	1.361	0.123654	0
2000	1355	101.191	1	1	294.797	-1.22588e+06	39.0076	-339.434	3688.41	155.59	-6.722	0	2.59413	0	1.378	0.123567	0
2000	1350	101.191	1	1	294.319	-1.22666e+06	38.9893	-338.953	3687.53	155.588	-6.768	0	2.59535	0	1.395	0.12348	0
2000	1345	101.191	1	1	293.839	-1.22744e+06	38.971	-338.473	3686.62	155.586	-6.815	0	2.59658	0	1.412	0.123394	0
2000	1340	101.191	1	1	293.358	-1.22822e+06	38.9526	-337.993	3685.7	155.585	-6.862	0	2.5978	0	1.429	0.123308	0
2000	1335	101.191	1	1	292.875	-1.229e+06	38.9343	-337.513	3684.77	155.583	-6.909	0	2.59903	0	1.447	0.123222	0
2000	1330	101.191	1	1	292.391	-1.22978e+06	38.916	-337.034	3683.82	155.581	-6.956	0	2.60025	0	1.464	0.123137	0
2000	1325	101.192	1	1	291.906	-1.23056e+06	38.8977	-336.556	3682.86	155.58	-7.004	0	2.60148	0	1.481	0.123053	0
2000	1320	101.192	1	1	291.418	-1.23134e+06	38.8794	-336.078	3681.88	155.578	-7.052	0	2.6027	0	1.499	0.122969	0
2000	1315	101.192	1	1	290.93	-1.23212e+06	38.8612	-335.601	3680.88	155.576	-7.1	0	2.60393	0	1.517	0.122886	0
2000	1310	101.192	1	1	290.44	-1.2329e+06	38.8429	-335.124	3679.87	155.575	-7.149	0	2.60516	0	1.534	0.122803	0
2000	1305	101.192	1	1	289.948	-1.23368e+06	38.8246	-334.648	3678.85	155.573	-7.198	0	2.60639	0	1.552	0.12272	0
2000	1300	101.192	1	1	289.454	-1.23446e+06	38.8064	-334.173	3677.81	155.572	-7.247	0	2.60762	0	1.57	0.122639	0
2000	1295	101.192	1	1	288.96	-1.23524e+06	38.7881	-333.698	3676.75	155.57	-7.296	0	2.60885	0	1.589	0.122558	0
2000	1290	101.193	1	1	288.463	-1.23602e+06	38.7699	-333.224	3675.68	155.569	-7.346	0	2.61008	0	1.607	0.122477	0
2000	1285	101.193	1	1	287.965	-1.2368e+06	38.7517	-332.75	3674.59	155.568	-7.396	0	2.61131	0	1.625	0.122397	0
2000	1280	101.193	1	1	287.466	-1.23758e+06	38.7335	-332.277	3673.49	155.566	-7.447	0	2.61255	0	1.644	0.122318	0
2000	1275	101.193	1	1	286.964	-1.23836e+06	38.7153	-331.804	3672.38	155.565	-7.498	0	2.61378	0	1.662	0.12224	0
2000	1270	101.193	1	1	286.462	-1.23914e+06	38.6971	-331.332	3671.25	155.564	-7.549	0	2.61501	0	1.681	0.122162	0
2000	1265	101.194	1	1	285.957	-1.23992e+06	38.6789	-330.861	3670.1	155.562	-7.6	0	2.61625	0	1.7	0.122085	0
2000	1260	101.194	1	1	285.451	-1.2407e+06	38.6607	-330.39	3668.94	155.561	-7.652	0	2.61748	0	1.719	0.122008	0
2000	1255	101.194	1	1	284.943	-1.24148e+06	38.6425	-329.92	3667.76	155.56	-7.704	0	2.61872	0	1.738	0.121933	0
2000	1250	101.194	1	1	284.434	-1.24227e+06	38.6244	-329.451	3666.57	155.559	-7.757	0	2.61996	0	1.757	0.121858	0
2000	1245	101.194	1	1	283.923	-1.24305e+06	38.6063	-328.982	3665.37	155.558	-7.81	0	2.62119	0	1.777	0.121784	0
2000	1240	101.195	1	1	283.41	-1.24383e+06	38.5881	-328.514	3664.15	155.556	-7.863	0	2.62243	0	1.796	0.121711	0
2000	1235	101.195	1	1	282.896	-1.24461e+06	38.57	-328.046	3662.91	155.555	-7.917	0	2.62367	0	1.816	0.121639	0
2000	1230	101.195	1	1	282.38	-1.24539e+06	38.5519	-327.579	3661.66	155.554	-7.97	0	2.62491	0	1.836	0.121568	0
2000	1225	101.195	1	1	281.862	-1.24617e+06	38.5338	-327.113	3660.4	155.553	-8.025	0	2.62615	0	1.855	0.121497	0
2000	1220	101.196	1	1	281.343	-1.24695e+06	38.5157	-326.647	3659.12	155.552	-8.079	0	2.62738	0	1.875	0.121428	0
2000	1215	101.196	1	1	280.821	-1.24773e+06	38.4976	-326.182	3657.82	155.551	-8.134	0	2.62862	0	1.896	0.12136	0
2000	1210	101.196	1	1	280.298	-1.24852e+06	38.4796	-325.718	3656.51	155.551	-8.19	0	2.62987	0	1.916	0.121292	0
2000	1205	101.196	0.997103	0.997645	279.691	-1.24941e+06	38.4552	-325.088	3649.47	152.331	-8.245	0	2.6301	3.23665	1.945	0.121387	0
2000	1200	100.903	0.995614	0.996437	278.334	-1.24669e+06	38.3374	-324.309	3635.23	151.722	-8.302	0	2.62981	3.23977	1.979	0.121562	0
2000	1195	100.461	0.995672	0.996488	276.619	-1.2421e+06	38.1739	-323.505	3618.95	150.93	-8.358	0	2.62952	3.24294	2.013	0.121731	0
2000	1190	100.027	0.995729	0.996538	274.928	-1.2376e+06	38.0132	-322.71	3602.91	150.153	-8.415	0	2.62925	3.24615	2.047	0.121895	0
2000	1185	99.6016	0.972146	0.977148	272.583	-1.2342e+06	37.7252	-319.106	3561.98	148.571	-8.472	0	2.62667	3.21809	2.078	0.126056	0
2000	1180	96.8292	0.948635	0.954756	264.273	-1.20095e+06	36.6836	-311.367	3457.14	143.561	-8.53	0	2.62265	2.99672	2.1	0.136198	0
2000	1175	91.859	0.944287	0.950369	250.662	-1.13793e+06	34.8579	-302.214	3329.58	135.824	-8.588	0	2.61838	2.95816	2.119	0.148387	0
2000	1170	86.7447	0.947221	0.953084	236.861	-1.07253e+06	32.9789	-293.638	3209.23	128.081	-8.646	0	2.61413	2.95903	2.138	0.160733	0
2000	1165	82.1699	0.949876	0.955539	224.504	-1.01409e+06	31.2972	-285.868	3101.04	121.153	-8.705	0	2.60991	2.9599	2.157	0.173204	0
2000	1160	78.0548	0.952291	0.95777	213.379	-961584	29.7838	-278.788	3003.24	114.92	-8.765	0	2.60572	2.96076	2.175	0.185769	0
2000	1155	74.3345	0.954496	0.959806	203.312	-914176	28.4149	-272.305	2914.39	109.284	-8.824	0	2.60156	2.96163	2.194	0.198402	0
2000	1150	70.9556	0.956516	0.961669	194.162	-871173	27.1711	-266.341	2833.31	104.166	-8.885	0	2.59744	2.96251	2.213	0.21108	0
2000	1145	67.8738	0.958373	0.963381	185.809	-832000	26.0362	-260.832	2759	99.4976	-8.945	0	2.59335	2.96341	2.231	0.22378	0
2000	1140	65.0521	0.960084	0.964958	178.154	-796180	24.9966	-255.722	2690.62	95.2241	-9.006	0	2.58929	2.96436	2.25	0.236483	0
2000	1135	62.4593	0.961664	0.966413	171.115	-763308	24.041	-250.964	2627.46	91.2978	-9.067	0	2.58526	2.96537	2.269	0.249171	0
2000	1130	60.0686	0.963123	0.967758	164.619	-733040	23.1595	-246.52	2568.93	87.6785	-9.129	0	2.58127	2.96647	2.288	0.261829	0
2000	1125	57.8572	0.964472	0.969001	158.605	-705082	22.3439	-242.355	2514.49	84.3318	-9.192	0	2.57729	2.96771	2.306	0.274445	0
2000	1120	55.8055	0.965716	0.97015	153.02	-679181	21.587	-238.439	2463.68	81.2275	-9.254	0	2.57333	2.96916	2.325	0.287007	0
2000	1115	53.8961	0.96685	0.971202	147.819	-655115	20.8824	-234.746	2416.08	78.3392	-9.318	0	2.56937	2.97098	2.344	0.299512	0
2000	1110	52.1134	0.967836	0.97213	142.958	-632686	20.2244	-231.249	2371.27	75.6426	-9.381	0	2.56538	2.97369	2.364	0.311966	0
2000	1105	50.4414	0.968591	0.972876	138.395	-611700	19.6074	-227.92	2328.71	73.112	-9.445	0	2.56124	2.97898	2.384	0.324401	0
2000	1100	48.8613	0.96912	0.973447	134.079	-591939	19.0249	-224.734	2287.87	70.72	-9.51	0	2.55686	2.98681	2.405	0.336848	0
2000	1095	47.357	0.969426	0.97384	129.97	-573217	18.4718	-221.665	2248.31	68.4429	-9.575	0	2.55213	2.99641	2.428	0.349343	0
2000	1090	45.914	0.969376	0.973957	126.027	-555366	17.9429	-218.685	2209.44	66.2576	-9.64	0	2.54685	3.00901	2.453	0.361963	0
2000	1085	44.5137	0.967692	0.972844	122.188	-538204	17.432	-215.7	2169.13	64.1184	-9.706	0	2.54004	3.03801	2.483	0.37515	0
2000	1080	43.0847	0.960256	0.967451	118.226	-521090	16.9161	-212.4	2120.17	61.867	-9.773	0	2.52801	3.11001	2.531	0.39061	0
2000	1075	41.3821	0.959159	0.966831	113.677	-501442	16.3262	-209.059	2068.89	59.3387	-9.84	0	2.51459	3.12096	2.583	0.406736	0
2000	1070	39.7013	0.96109	0.968452	109.236	-482216	15.7489	-205.899	2021.22	56.8961	-9.907	0	2.50174	3.10916	2.632	0.422651	0
2000	1065	38.1654	0.962913	0.969969	105.17	-464630	15.2193	-202.935	1977.74	54.666	-9.975	0	2.48946	3.0969	2.679	0.438339	0
2000	1060	36.7583	0.964561	0.971336	101.438	-448500	14.7321	-200.144	1937.93	52.6236	-10.044	0	2.47772	3.08486	2.724	0.453812	0
2000	1055	35.4637	0.96605	0.972568	97.9973	-433640	14.282	-197.505	1901.3	50.745	-10.113	0	2.46646	3.07309	2.766	0.469083	0
2000	1050	34.2675	0.967395	0.973678	94.8117	-419891	13.8644	-194.999	1867.43	49.0097	-10.183	0	2.45566	3.06162	2.806	0.484166	0
2000	1045	33.1576	0.968611	0.97468	91.8505	-407118	13.4755	-192.611	1835.98	47.4002	-10.253	0	2.44527	3.05045	2.845	0.499076	0
2000	1040	32.124	0.96971	0.975586	89.0878	-395207	13.1118	-190.328	1806.66	45.9019	-10.323	0	2.43526	3.0396	2.881	0.513826	0
2000	1035	31.158	0.963366	0.970518	86.4586	-384117	12.7613	-187.681	1776.76	44.4535	-10.394	0	2.42361	3.03385	2.909	0.532217	0
2000	1030	30.0225	0.96822	0.974383	83.4867	-370787	12.3601	-185.244	1747.94	42.8521	-10.466	0	2.41362	3.01345	2.935	0.54867	0
2000	1025	29.0741	0.969327	0.975329	80.9625	-359701	12.0198	-182.957	1722.23	41.4906	-10.538	0	2.40396	3.00729	2.959	0.564827	0
2000	1020	28.1879	0.97035	0.9762	78.6002	-349333	11.7008	-180.774	1698.21	40.2216	-10.611	0	2.39461	3.00113	2.982	0.580701	0
2000	1015	27.3575	0.971294	0.977001	76.3835	-339609	11.401	-178.682	1675.54	39.0305	-10.684	0	2.38556	2.99496	3.004	0.596302	0
2000	1010	26.5775	0.972166	0.977739	74.298	-330466	11.1184	-176.673	1654.16	37.9119	-10.758	0	2.37678	2.98881	3.024	0.611642	0
2000	1005	25.8429	0.972972	0.978419	72.3312	-321847	10.8514	-174.739	1633.94	36.859	-10.833	0	2.36827	2.98268	3.043	0.62673	0
2000	1000	25.1495	0.973717	0.979047	70.4719	-313704	10.5985	-172.874	1614.78	35.8655	-10.908	0	2.36	2.97659	3.061	0.641579	0
2000	995	24.4934	0.974405	0.979627	68.7104	-305992	10.3585	-171.071	1596.57	34.9259	-10.984	0	2.35196	2.97054	3.078	0.656197	0
2000	990	23.8714	0.975043	0.980162	67.038	-298674	10.1302	-169.325	1579.22	34.0356	-11.06	0	2.34414	2.96455	3.094	0.670595	0
2000	985	23.2804	0.975632	0.980657	65.447	-291714	9.91263	-167.631	1562.65	33.1901	-11.137	0	2.33653	2.95861	3.109	0.684783	0
2000	980	22.7179	0.976178	0.981114	63.9306	-285083	9.70483	-165.985	1546.81	32.3856	-11.214	0	2.32911	2.95274	3.123	0.698769	0
2000	975	22.1814	0.976683	0.981538	62.4826	-278752	9.50601	-164.382	1531.62	31.6189	-11.293	0	2.32187	2.94694	3.136	0.712562	0
2000	970	21.6688	0.977151	0.98193	61.0977	-272699	9.31545	-162.82	1517.03	30.8867	-11.371	0	2.3148	2.94121	3.148	0.726171	0
2000	965	21.1783	0.977584	0.982292	59.7708	-266900	9.13251	-161.295	1502.99	30.1863	-11.451	0	2.30789	2.93556	3.159	0.739602	0
2000	960	20.7081	0.977985	0.982628	58.4976	-261336	8.9566	-159.804	1489.45	29.5154	-11.531	0	2.30112	2.93	3.17	0.752863	0
2000	955	20.2567	0.978355	0.982939	57.2741	-255990	8.78719	-158.345	1476.38	28.8717	-11.611	0	2.2945	2.92453	3.179	0.765962	0
2000	950	19.8226	0.978698	0.983226	56.0967	-250846	8.62382	-156.915	1463.74	28.2531	-11.693	0	2.28801	2.91915	3.188	0.778904	0
2000	945	19.4048	0.979014	0.983492	54.9622	-245888	8.46605	-155.513	1451.49	27.658	-11.775	0	2.28163	2.91387	3.195	0.791695	0
2000	940	19.0019	0.979306	0.983738	53.8675	-241104	8.31349	-154.137	1439.62	27.0846	-11.857	0	2.27537	2.9087	3.202	0.804342	0
2000	935	18.613	0.979574	0.983965	52.8101	-236482	8.16578	-152.784	1428.08	26.5314	-11.941	0	2.26922	2.90364	3.208	0.81685	0
2000	930	18.2371	0.97982	0.984174	51.7874	-232010	8.0226	-151.453	1416.85	25.997	-12.025	0	2.26316	2.8987	3.214	0.829224	0
2000	925	17.8734	0.980045	0.984367	50.7971	-227680	7.88366	-150.144	1405.92	25.4803	-12.11	0	2.25719	2.89388	3.218	0.841468	0
2000	920	17.521	0.98025	0.984543	49.8373	-223481	7.74866	-148.853	1395.25	24.98	-12.195	0	2.2513	2.8892	3.222	0.853589	0
2000	915	17.1792	0.980437	0.984705	48.906	-219405	7.61738	-147.581	1384.84	24.4951	-12.281	0	2.24548	2.88464	3.225	0.86559	0
2000	910	16.8473	0.980605	0.984853	48.0015	-215445	7.48958	-146.326	1374.66	24.0246	-12.368	0	2.23973	2.88024	3.227	0.877475	0
2000	905	16.5248	0.980755	0.984986	47.1222	-211593	7.36503	-145.087	1364.69	23.5677	-12.456	0	2.23404	2.87598	3.228	0.88925	0
2000	900	16.2109	0.980889	0.985107	46.2665	-207844	7.24356	-143.863	1354.93	23.1234	-12.544	0	2.2284	2.87187	3.229	0.900918	0
Title:	Allan	et	al.	1989	(see	Ghiorso	1997)
Liquid	Composition:
Pressure	Temperature	mass	SiO2	TiO2	Al2O3	Fe2O3	Cr2O3	FeO	MgO	CaO	Na2O	K2O	P2O5	H2O
2000	1400	101.19	48.1075	0.998123	17.4326	1.27391	0.0296472	7.14588	8.99299	12.3036	2.61884	0.0296472	0.0790592	0.98824
2000	1400	101.19	48.1075	0.998123	17.4326	1.27391	0.0296472	7.14588	8.99299	12.3036	2.61884	0.0296472	0.0790592	0.98824
2000	1395	101.19	48.1075	0.998122	17.4325	1.27466	0.0296472	7.1452	8.99298	12.3036	2.61883	0.0296472	0.0790591	0.988239
2000	1390	101.19	48.1075	0.998121	17.4325	1.27545	0.0296472	7.14448	8.99297	12.3036	2.61883	0.0296472	0.0790591	0.988239
2000	1385	101.19	48.1074	0.99812	17.4325	1.27628	0.0296471	7.14373	8.99296	12.3036	2.61883	0.0296471	0.079059	0.988238
2000	1380	101.19	48.1074	0.998119	17.4325	1.27715	0.0296471	7.14294	8.99296	12.3035	2.61883	0.0296471	0.079059	0.988237
2000	1375	101.19	48.1073	0.998118	17.4325	1.27805	0.0296471	7.14212	8.99295	12.3035	2.61883	0.0296471	0.0790589	0.988236
2000	1370	101.19	48.1073	0.998117	17.4325	1.279	0.0296471	7.14125	8.99294	12.3035	2.61882	0.0296471	0.0790588	0.988235
2000	1365	101.191	48.1072	0.998116	17.4324	1.27999	0.029647	7.14036	8.99293	12.3035	2.61882	0.029647	0.0790587	0.988234
2000	1360	101.191	48.1072	0.998115	17.4324	1.28102	0.029647	7.13942	8.99292	12.3035	2.61882	0.029647	0.0790586	0.988233
2000	1355	101.191	48.1071	0.998114	17.4324	1.28209	0.029647	7.13845	8.99291	12.3035	2.61881	0.029647	0.0790586	0.988232
2000	1350	101.191	48.1071	0.998113	17.4324	1.2832	0.0296469	7.13744	8.9929	12.3035	2.61881	0.0296469	0.0790585	0.988231
2000	1345	101.191	48.107	0.998112	17.4324	1.28436	0.0296469	7.13639	8.99289	12.3035	2.61881	0.0296469	0.0790584	0.98823
2000	1340	101.191	48.107	0.998111	17.4324	1.28556	0.0296469	7.1353	8.99288	12.3034	2.61881	0.0296469	0.0790583	0.988229
2000	1335	101.191	48.1069	0.99811	17.4323	1.28681	0.0296468	7.13417	8.99287	12.3034	2.6188	0.0296468	0.0790582	0.988227
2000	1330	101.191	48.1068	0.998108	17.4323	1.2881	0.0296468	7.133	8.99286	12.3034	2.6188	0.0296468	0.0790581	0.988226
2000	1325	101.192	48.1068	0.998107	17.4323	1.28943	0.0296467	7.13178	8.99285	12.3034	2.6188	0.0296467	0.079058	0.988225
2000	1320	101.192	48.1067	0.998106	17.4323	1.29081	0.0296467	7.13053	8.99283	12.3034	2.61879	0.0296467	0.0790579	0.988223
2000	1315	101.192	48.1066	0.998104	17.4322	1.29224	0.0296467	7.12923	8.99282	12.3034	2.61879	0.0296467	0.0790578	0.988222
2000	1310	101.192	48.1066	0.998103	17.4322	1.29372	0.0296466	7.12789	8.99281	12.3033	2.61878	0.0296466	0.0790576	0.98822
2000	1305	101.192	48.1065	0.998101	17.4322	1.29524	0.0296466	7.12651	8.99279	12.3033	2.61878	0.0296466	0.0790575	0.988219
2000	1300	101.192	48.1064	0.9981	17.4322	1.29681	0.0296465	7.12508	8.99278	12.3033	2.61878	0.0296465	0.0790574	0.988217
2000	1295	101.192	48.1063	0.998098	17.4321	1.29844	0.0296465	7.12361	8.99276	12.3033	2.61877	0.0296465	0.0790573	0.988216
2000	1290	101.193	48.1063	0.998096	17.4321	1.30011	0.0296464	7.12209	8.99275	12.3033	2.61877	0.0296464	0.0790571	0.988214
2000	1285	101.193	48.1062	0.998095	17.4321	1.30183	0.0296464	7.12052	8.99273	12.3032	2.61876	0.0296464	0.079057	0.988212
2000	1280	101.193	48.1061	0.998093	17.432	1.30361	0.0296463	7.11891	8.99272	12.3032	2.61876	0.0296463	0.0790569	0.988211
2000	1275	101.193	48.106	0.998091	17.432	1.30544	0.0296463	7.11725	8.9927	12.3032	2.61875	0.0296463	0.0790567	0.988209
2000	1270	101.193	48.1059	0.998089	17.432	1.30732	0.0296462	7.11554	8.99268	12.3032	2.61875	0.0296462	0.0790566	0.988207
2000	1265	101.194	48.1058	0.998087	17.4319	1.30925	0.0296462	7.11378	8.99267	12.3032	2.61874	0.0296462	0.0790564	0.988205
2000	1260	101.194	48.1057	0.998085	17.4319	1.31125	0.0296461	7.11197	8.99265	12.3031	2.61874	0.0296461	0.0790562	0.988203
2000	1255	101.194	48.1056	0.998083	17.4319	1.31329	0.029646	7.11011	8.99263	12.3031	2.61873	0.029646	0.0790561	0.988201
2000	1250	101.194	48.1055	0.998081	17.4318	1.3154	0.029646	7.1082	8.99261	12.3031	2.61873	0.029646	0.0790559	0.988199
2000	1245	101.194	48.1054	0.998079	17.4318	1.31756	0.0296459	7.10624	8.99259	12.3031	2.61872	0.0296459	0.0790557	0.988197
2000	1240	101.195	48.1053	0.998077	17.4318	1.31978	0.0296458	7.10422	8.99257	12.303	2.61872	0.0296458	0.0790556	0.988195
2000	1235	101.195	48.1052	0.998074	17.4317	1.32206	0.0296458	7.10215	8.99255	12.303	2.61871	0.0296458	0.0790554	0.988192
2000	1230	101.195	48.1051	0.998072	17.4317	1.3244	0.0296457	7.10003	8.99253	12.303	2.6187	0.0296457	0.0790552	0.98819
2000	1225	101.195	48.105	0.99807	17.4316	1.3268	0.0296456	7.09785	8.99251	12.3029	2.6187	0.0296456	0.079055	0.988188
2000	1220	101.196	48.1049	0.998067	17.4316	1.32926	0.0296456	7.09561	8.99249	12.3029	2.61869	0.0296456	0.0790548	0.988185
2000	1215	101.196	48.1047	0.998065	17.4315	1.33179	0.0296455	7.09331	8.99246	12.3029	2.61868	0.0296455	0.0790546	0.988183
2000	1210	101.196	48.1046	0.998062	17.4315	1.33438	0.0296454	7.09096	8.99244	12.3028	2.61868	0.0296454	0.0790544	0.98818
2000	1205	100.903	48.1276	1.00096	17.4822	1.33638	0.0297316	7.07578	8.88378	12.3372	2.62629	0.0297316	0.0792842	0.991053
2000	1200	100.461	48.1626	1.00537	17.5591	1.33798	0.0298624	7.05324	8.71961	12.3895	2.63784	0.0298624	0.079633	0.995413
2000	1195	100.027	48.1976	1.00973	17.6353	1.33953	0.029992	7.03012	8.55759	12.4412	2.6493	0.029992	0.0799787	0.999734
2000	1190	99.6	48.2323	1.01406	17.7108	1.34102	0.0301205	7.00643	8.39771	12.4924	2.66064	0.0301205	0.0803213	1.00402
2000	1185	96.8273	48.1689	1.03004	18.0581	1.34551	0.030983	7.07827	8.15295	12.2569	2.73199	0.030983	0.0826213	1.03277
2000	1180	91.8555	48.1882	1.07148	18.1477	1.3741	0.0278195	7.2665	7.89832	11.9794	2.83811	0.0325984	0.0870933	1.08867
2000	1175	86.7412	48.229	1.12059	18.1444	1.41013	0.0270313	7.48884	7.6483	11.7002	2.95202	0.0344363	0.0922283	1.15285
2000	1170	82.1664	48.2713	1.16845	18.1394	1.44506	0.0261878	7.70529	7.40383	11.4253	3.06446	0.0362697	0.0973634	1.21704
2000	1165	78.0512	48.3153	1.21504	18.1325	1.47897	0.0252901	7.91601	7.16483	11.1547	3.17546	0.0380981	0.102497	1.28121
2000	1160	74.3309	48.3611	1.26033	18.1238	1.51192	0.0243388	8.12113	6.93121	10.8883	3.28501	0.039921	0.107627	1.34534
2000	1155	70.9519	48.4085	1.30427	18.1132	1.54395	0.0233344	8.32076	6.70291	10.626	3.39314	0.0417382	0.112752	1.40941
2000	1150	67.8701	48.4578	1.34683	18.1007	1.57512	0.0222768	8.515	6.47985	10.3678	3.49984	0.0435492	0.117872	1.4734
2000	1145	65.0484	48.5089	1.38797	18.0863	1.60548	0.0211651	8.70393	6.26194	10.1135	3.60512	0.0453539	0.122985	1.53732
2000	1140	62.4555	48.562	1.42762	18.0701	1.63505	0.0199975	8.88761	6.04909	9.86314	3.709	0.0471521	0.128091	1.60114
2000	1135	60.0648	48.6171	1.46574	18.052	1.66387	0.0187706	9.06609	5.84122	9.61665	3.81148	0.0489438	0.133189	1.66487
2000	1130	57.8534	48.6745	1.50223	18.0322	1.69198	0.0174785	9.23939	5.63821	9.37395	3.9126	0.050729	0.13828	1.72851
2000	1125	55.8017	48.7342	1.537	18.0106	1.7194	0.0161102	9.40749	5.43995	9.13493	4.01238	0.0525082	0.143365	1.79206
2000	1120	53.8923	48.7966	1.56991	17.9875	1.74612	0.0146451	9.5703	5.2463	8.89948	4.11086	0.0542819	0.148444	1.85555
2000	1115	52.1095	48.8623	1.6007	17.9629	1.77214	0.013036	9.72756	5.05709	8.66745	4.20815	0.0560515	0.153523	1.91904
2000	1110	50.4373	48.9329	1.62884	17.9373	1.79734	0.0111465	9.87829	4.87201	8.43859	4.30451	0.0578214	0.158613	1.98266
2000	1105	48.857	49.0124	1.65292	17.9112	1.82137	0.00871114	10.0199	4.69049	8.21241	4.40056	0.0596017	0.163743	2.04679
2000	1100	47.3525	49.1053	1.6712	17.8847	1.84387	0.00584809	10.1495	4.51203	7.98842	4.49698	0.0614037	0.168946	2.11182
2000	1095	45.9091	49.2162	1.68168	17.8575	1.8645	0.00305956	10.2643	4.3363	7.76634	4.59442	0.0632399	0.174257	2.17822
2000	1090	44.5079	49.353	1.68105	17.829	1.88261	0.000949625	10.3588	4.16281	7.54599	4.69401	0.0651325	0.179743	2.24679
2000	1085	43.0756	49.557	1.65538	17.7982	1.89438	5.16734e-05	10.403	3.9889	7.32703	4.80164	0.0671903	0.18572	2.3215
2000	1080	41.3723	49.9784	1.55746	17.7632	1.88481	2.93068e-08	10.2815	3.80588	7.10939	4.93913	0.069818	0.193366	2.41708
2000	1075	39.692	50.4617	1.44231	17.7214	1.86783	0	10.1029	3.62771	6.89891	5.08363	0.0726209	0.201552	2.5194
2000	1070	38.1566	50.9266	1.33632	17.672	1.85123	0	9.9274	3.45984	6.69748	5.22329	0.0753861	0.209662	2.62078
2000	1065	36.7499	51.3729	1.23911	17.615	1.83524	0	9.75646	3.30158	6.50486	5.35795	0.0781098	0.217687	2.72109
2000	1060	35.4557	51.802	1.14975	17.5509	1.81984	0	9.59002	3.1522	6.32065	5.48783	0.0807945	0.225634	2.82042
2000	1055	34.2597	52.2155	1.06743	17.4798	1.80501	0	9.42784	3.011	6.14443	5.61315	0.0834432	0.23351	2.91888
2000	1050	33.1502	52.6147	0.991441	17.4024	1.79068	0	9.26964	2.87733	5.97579	5.73411	0.0860589	0.241326	3.01657
2000	1045	32.1168	53.0008	0.92116	17.3188	1.77682	0	9.11513	2.75063	5.81432	5.85096	0.0886449	0.249091	3.11363
2000	1040	31.151	53.3749	0.856044	17.2296	1.76338	0	8.96398	2.63037	5.65965	5.96388	0.0912041	0.256814	3.21017
2000	1035	30.0166	53.7141	0.798921	17.1536	1.75037	0	8.79132	2.45952	5.53034	6.10938	0.0944238	0.266519	3.33149
2000	1030	29.0684	54.0313	0.744033	17.0516	1.73927	0	8.63971	2.34107	5.40726	6.23303	0.0972833	0.275213	3.44016
2000	1025	28.1823	54.3391	0.692413	16.9479	1.72833	0	8.49208	2.22864	5.28571	6.35351	0.100117	0.283866	3.54833
2000	1020	27.3521	54.638	0.643862	16.8424	1.71753	0	8.3482	2.12188	5.16582	6.47089	0.102925	0.292482	3.65603
2000	1015	26.5722	54.9282	0.598195	16.7353	1.70687	0	8.20785	2.02045	5.04769	6.58527	0.105711	0.301067	3.76333
2000	1010	25.8377	55.2104	0.555236	16.6266	1.69635	0	8.07079	1.92404	4.93142	6.69673	0.108475	0.309625	3.87031
2000	1005	25.1444	55.4848	0.514826	16.5164	1.68596	0	7.93682	1.83237	4.81706	6.80535	0.111218	0.318162	3.97703
2000	1000	24.4884	55.7518	0.476813	16.4048	1.67567	0	7.80572	1.74514	4.70466	6.91121	0.113943	0.326685	4.08356
2000	995	23.8665	56.0118	0.441058	16.2917	1.66549	0	7.6773	1.66212	4.59426	7.01442	0.11665	0.335198	4.18997
2000	990	23.2756	56.2651	0.407433	16.1774	1.6554	0	7.55135	1.58305	4.48586	7.11503	0.119342	0.343707	4.29634
2000	985	22.7131	56.512	0.375818	16.0618	1.64538	0	7.4277	1.50772	4.37949	7.21315	0.122019	0.352219	4.40274
2000	980	22.1767	56.7528	0.346102	15.945	1.63542	0	7.30617	1.43591	4.27514	7.30883	0.124684	0.360739	4.50924
2000	975	21.6642	56.9878	0.318183	15.827	1.62549	0	7.1866	1.36744	4.17282	7.40216	0.127337	0.369273	4.61591
2000	970	21.1737	57.2172	0.291966	15.7079	1.61559	0	7.06883	1.30211	4.07252	7.49321	0.12998	0.377827	4.72284
2000	965	20.7035	57.4414	0.267363	15.5877	1.6057	0	6.9527	1.23978	3.97423	7.58205	0.132615	0.386407	4.83009
2000	960	20.2522	57.6604	0.244291	15.4665	1.59578	0	6.83806	1.18027	3.87794	7.66873	0.135242	0.395019	4.93774
2000	955	19.8182	57.8746	0.222676	15.3443	1.58584	0	6.72476	1.12345	3.78363	7.75333	0.137862	0.403669	5.04587
2000	950	19.4004	58.0842	0.202446	15.2211	1.57583	0	6.61266	1.06918	3.69129	7.83591	0.140478	0.412363	5.15454
2000	945	18.9976	58.2894	0.183535	15.0969	1.56575	0	6.50162	1.01734	3.60091	7.91651	0.143089	0.421107	5.26384
2000	940	18.6087	58.4904	0.165881	14.9718	1.55556	0	6.39149	0.967814	3.51247	7.99519	0.145698	0.429907	5.37384
2000	935	18.2328	58.6874	0.149426	14.8457	1.54523	0	6.28213	0.920488	3.42595	8.07202	0.148304	0.438769	5.48461
2000	930	17.8691	58.8806	0.134118	14.7187	1.53474	0	6.17338	0.875268	3.34135	8.14702	0.15091	0.4477	5.59625
2000	925	17.5167	59.0702	0.119904	14.5907	1.52406	0	6.06509	0.83206	3.25865	8.22027	0.153516	0.456707	5.70883
2000	920	17.1749	59.2564	0.106737	14.4619	1.51314	0	5.95711	0.790781	3.17784	8.29179	0.156122	0.465795	5.82244
2000	915	16.8431	59.4395	0.0945719	14.332	1.50194	0	5.84927	0.751352	3.0989	8.36164	0.15873	0.474972	5.93715
2000	910	16.5206	59.6195	0.0833659	14.2012	1.49043	0	5.74141	0.713701	3.02184	8.42985	0.161341	0.484245	6.05306
2000	905	16.2068	59.7969	0.0730783	14.0694	1.47856	0	5.63334	0.677763	2.94663	8.49647	0.163956	0.493621	6.17027
2000	900	15.9011	59.9717	0.0636705	13.9366	1.46627	0	5.52489	0.643476	2.87328	8.56154	0.166574	0.503109	6.28886
Title:	Allan	et	al.	1989	(see	Ghiorso	1997)
liquid_0	thermodynamic	data	and	composition:
Pressure	Temperature	mass	S	H	V	Cp	viscosity	SiO2	TiO2	Al2O3	Fe2O3	Cr2O3	FeO	MgO	CaO	Na2O	K2O	P2O5	H2O	Mg#
2000	1400	101.19	299.037	-1.21887e+06	39.173	155.607	1.23	48.1075	0.998123	17.4326	1.27391	0.0296472	7.14588	8.99299	12.3036	2.61884	0.0296472	0.0790592	0.98824	69.1
2000	1400	101.19	299.037	-1.21887e+06	39.173	155.607	1.23	48.1075	0.998123	17.4326	1.27391	0.0296472	7.14588	8.99299	12.3036	2.61884	0.0296472	0.0790592	0.98824	69.1
2000	1395	101.19	298.572	-1.21965e+06	39.1546	155.605	1.246	48.1075	0.998122	17.4325	1.27466	0.0296472	7.1452	8.99298	12.3036	2.61883	0.0296472	0.0790591	0.988239	69.2
2000	1390	101.19	298.105	-1.22043e+06	39.1362	155.603	1.262	48.1075	0.998121	17.4325	1.27545	0.0296472	7.14448	8.99297	12.3036	2.61883	0.0296472	0.0790591	0.988239	69.2
2000	1385	101.19	297.637	-1.22121e+06	39.1178	155.601	1.279	48.1074	0.99812	17.4325	1.27628	0.0296471	7.14373	8.99296	12.3036	2.61883	0.0296471	0.079059	0.988238	69.2
2000	1380	101.19	297.167	-1.22199e+06	39.0994	155.599	1.295	48.1074	0.998119	17.4325	1.27715	0.0296471	7.14294	8.99296	12.3035	2.61883	0.0296471	0.079059	0.988237	69.2
2000	1375	101.19	296.696	-1.22276e+06	39.0811	155.597	1.311	48.1073	0.998118	17.4325	1.27805	0.0296471	7.14212	8.99295	12.3035	2.61883	0.0296471	0.0790589	0.988236	69.2
2000	1370	101.19	296.223	-1.22354e+06	39.0627	155.595	1.328	48.1073	0.998117	17.4325	1.279	0.0296471	7.14125	8.99294	12.3035	2.61882	0.0296471	0.0790588	0.988235	69.2
2000	1365	101.191	295.749	-1.22432e+06	39.0443	155.593	1.345	48.1072	0.998116	17.4324	1.27999	0.029647	7.14036	8.99293	12.3035	2.61882	0.029647	0.0790587	0.988234	69.2
2000	1360	101.191	295.274	-1.2251e+06	39.026	155.592	1.361	48.1072	0.998115	17.4324	1.28102	0.029647	7.13942	8.99292	12.3035	2.61882	0.029647	0.0790586	0.988233	69.2
2000	1355	101.191	294.797	-1.22588e+06	39.0076	155.59	1.378	48.1071	0.998114	17.4324	1.28209	0.029647	7.13845	8.99291	12.3035	2.61881	0.029647	0.0790586	0.988232	69.2
2000	1350	101.191	294.319	-1.22666e+06	38.9893	155.588	1.395	48.1071	0.998113	17.4324	1.2832	0.0296469	7.13744	8.9929	12.3035	2.61881	0.0296469	0.0790585	0.988231	69.2
2000	1345	101.191	293.839	-1.22744e+06	38.971	155.586	1.412	48.107	0.998112	17.4324	1.28436	0.0296469	7.13639	8.99289	12.3035	2.61881	0.0296469	0.0790584	0.98823	69.2
2000	1340	101.191	293.358	-1.22822e+06	38.9526	155.585	1.429	48.107	0.998111	17.4324	1.28556	0.0296469	7.1353	8.99288	12.3034	2.61881	0.0296469	0.0790583	0.988229	69.2
2000	1335	101.191	292.875	-1.229e+06	38.9343	155.583	1.447	48.1069	0.99811	17.4323	1.28681	0.0296468	7.13417	8.99287	12.3034	2.6188	0.0296468	0.0790582	0.988227	69.2
2000	1330	101.191	292.391	-1.22978e+06	38.916	155.581	1.464	48.1068	0.998108	17.4323	1.2881	0.0296468	7.133	8.99286	12.3034	2.6188	0.0296468	0.0790581	0.988226	69.2
2000	1325	101.192	291.906	-1.23056e+06	38.8977	155.58	1.481	48.1068	0.998107	17.4323	1.28943	0.0296467	7.13178	8.99285	12.3034	2.6188	0.0296467	0.079058	0.988225	69.2
2000	1320	101.192	291.418	-1.23134e+06	38.8794	155.578	1.499	48.1067	0.998106	17.4323	1.29081	0.0296467	7.13053	8.99283	12.3034	2.61879	0.0296467	0.0790579	0.988223	69.2
2000	1315	101.192	290.93	-1.23212e+06	38.8612	155.576	1.517	48.1066	0.998104	17.4322	1.29224	0.0296467	7.12923	8.99282	12.3034	2.61879	0.0296467	0.0790578	0.988222	69.2
2000	1310	101.192	290.44	-1.2329e+06	38.8429	155.575	1.534	48.1066	0.998103	17.4322	1.29372	0.0296466	7.12789	8.99281	12.3033	2.61878	0.0296466	0.0790576	0.98822	69.2
2000	1305	101.192	289.948	-1.23368e+06	38.8246	155.573	1.552	48.1065	0.998101	17.4322	1.29524	0.0296466	7.12651	8.99279	12.3033	2.61878	0.0296466	0.0790575	0.988219	69.2
2000	1300	101.192	289.454	-1.23446e+06	38.8064	155.572	1.57	48.1064	0.9981	17.4322	1.29681	0.0296465	7.12508	8.99278	12.3033	2.61878	0.0296465	0.0790574	0.988217	69.2
2000	1295	101.192	288.96	-1.23524e+06	38.7881	155.57	1.589	48.1063	0.998098	17.4321	1.29844	0.0296465	7.12361	8.99276	12.3033	2.61877	0.0296465	0.0790573	0.988216	69.2
2000	1290	101.193	288.463	-1.23602e+06	38.7699	155.569	1.607	48.1063	0.998096	17.4321	1.30011	0.0296464	7.12209	8.99275	12.3033	2.61877	0.0296464	0.0790571	0.988214	69.2
2000	1285	101.193	287.965	-1.2368e+06	38.7517	155.568	1.625	48.1062	0.998095	17.4321	1.30183	0.0296464	7.12052	8.99273	12.3032	2.61876	0.0296464	0.079057	0.988212	69.2
2000	1280	101.193	287.466	-1.23758e+06	38.7335	155.566	1.644	48.1061	0.998093	17.432	1.30361	0.0296463	7.11891	8.99272	12.3032	2.61876	0.0296463	0.0790569	0.988211	69.2
2000	1275	101.193	286.964	-1.23836e+06	38.7153	155.565	1.662	48.106	0.998091	17.432	1.30544	0.0296463	7.11725	8.9927	12.3032	2.61875	0.0296463	0.0790567	0.988209	69.2
2000	1270	101.193	286.462	-1.23914e+06	38.6971	155.564	1.681	48.1059	0.998089	17.432	1.30732	0.0296462	7.11554	8.99268	12.3032	2.61875	0.0296462	0.0790566	0.988207	69.2
2000	1265	101.194	285.957	-1.23992e+06	38.6789	155.562	1.7	48.1058	0.998087	17.4319	1.30925	0.0296462	7.11378	8.99267	12.3032	2.61874	0.0296462	0.0790564	0.988205	69.2
2000	1260	101.194	285.451	-1.2407e+06	38.6607	155.561	1.719	48.1057	0.998085	17.4319	1.31125	0.0296461	7.11197	8.99265	12.3031	2.61874	0.0296461	0.0790562	0.988203	69.2
2000	1255	101.194	284.943	-1.24148e+06	38.6425	155.56	1.738	48.1056	0.998083	17.4319	1.31329	0.029646	7.11011	8.99263	12.3031	2.61873	0.029646	0.0790561	0.988201	69.3
2000	1250	101.194	284.434	-1.24227e+06	38.6244	155.559	1.757	48.1055	0.998081	17.4318	1.3154	0.029646	7.1082	8.99261	12.3031	2.61873	0.029646	0.0790559	0.988199	69.3
2000	1245	101.194	283.923	-1.24305e+06	38.6063	155.558	1.777	48.1054	0.998079	17.4318	1.31756	0.0296459	7.10624	8.99259	12.3031	2.61872	0.0296459	0.0790557	0.988197	69.3
2000	1240	101.195	283.41	-1.24383e+06	38.5881	155.556	1.796	48.1053	0.998077	17.4318	1.31978	0.0296458	7.10422	8.99257	12.303	2.61872	0.0296458	0.0790556	0.988195	69.3
2000	1235	101.195	282.896	-1.24461e+06	38.57	155.555	1.816	48.1052	0.998074	17.4317	1.32206	0.0296458	7.10215	8.99255	12.303	2.61871	0.0296458	0.0790554	0.988192	69.3
2000	1230	101.195	282.38	-1.24539e+06	38.5519	155.554	1.836	48.1051	0.998072	17.4317	1.3244	0.0296457	7.10003	8.99253	12.303	2.6187	0.0296457	0.0790552	0.98819	69.3
2000	1225	101.195	281.862	-1.24617e+06	38.5338	155.553	1.855	48.105	0.99807	17.4316	1.3268	0.0296456	7.09785	8.99251	12.3029	2.6187	0.0296456	0.079055	0.988188	69.3
2000	1220	101.196	281.343	-1.24695e+06	38.5157	155.552	1.875	48.1049	0.998067	17.4316	1.32926	0.0296456	7.09561	8.99249	12.3029	2.61869	0.0296456	0.0790548	0.988185	69.3
2000	1215	101.196	280.821	-1.24773e+06	38.4976	155.551	1.896	48.1047	0.998065	17.4315	1.33179	0.0296455	7.09331	8.99246	12.3029	2.61868	0.0296455	0.0790546	0.988183	69.3
2000	1210	101.196	280.298	-1.24852e+06	38.4796	155.551	1.916	48.1046	0.998062	17.4315	1.33438	0.0296454	7.09096	8.99244	12.3028	2.61868	0.0296454	0.0790544	0.98818	69.3
2000	1205	100.903	278.976	-1.24574e+06	38.3646	151.962	1.945	48.1276	1.00096	17.4822	1.33638	0.0297316	7.07578	8.88378	12.3372	2.62629	0.0297316	0.0792842	0.991053	69.1
2000	1200	100.461	277.257	-1.24115e+06	38.2008	151.166	1.979	48.1626	1.00537	17.5591	1.33798	0.0298624	7.05324	8.71961	12.3895	2.63784	0.0298624	0.079633	0.995413	68.8
2000	1195	100.027	275.562	-1.23666e+06	38.0398	150.384	2.013	48.1976	1.00973	17.6353	1.33953	0.029992	7.03012	8.55759	12.4412	2.6493	0.029992	0.0799787	0.999734	68.4
2000	1190	99.6	273.892	-1.23226e+06	37.8816	149.617	2.047	48.2323	1.01406	17.7108	1.34102	0.0301205	7.00643	8.39771	12.4924	2.66064	0.0301205	0.0803213	1.00402	68.1
2000	1185	96.8273	266.081	-1.19829e+06	36.8631	145.259	2.078	48.1689	1.03004	18.0581	1.34551	0.030983	7.07827	8.15295	12.2569	2.73199	0.030983	0.0826213	1.03277	67.2
2000	1180	91.8555	252.457	-1.13528e+06	35.0239	137.534	2.1	48.1882	1.07148	18.1477	1.3741	0.0278195	7.2665	7.89832	11.9794	2.83811	0.0325984	0.0870933	1.08867	65.9
2000	1175	86.7412	238.489	-1.07012e+06	33.1279	129.61	2.119	48.229	1.12059	18.1444	1.41013	0.0270313	7.48884	7.6483	11.7002	2.95202	0.0344363	0.0922283	1.15285	64.5
2000	1170	82.1664	225.988	-1.01189e+06	31.4316	122.526	2.138	48.2713	1.16845	18.1394	1.44506	0.0261878	7.70529	7.40383	11.4253	3.06446	0.0362697	0.0973634	1.21704	63.1
2000	1165	78.0512	214.739	-959575	29.9057	116.16	2.157	48.3153	1.21504	18.1325	1.47897	0.0252901	7.91601	7.16483	11.1547	3.17546	0.0380981	0.102497	1.28121	61.7
2000	1160	74.3309	204.565	-912328	28.526	110.41	2.175	48.3611	1.26033	18.1238	1.51192	0.0243388	8.12113	6.93121	10.8883	3.28501	0.039921	0.107627	1.34534	60.3
2000	1155	70.9519	195.319	-869466	27.2728	105.191	2.194	48.4085	1.30427	18.1132	1.54395	0.0233344	8.32076	6.70291	10.626	3.39314	0.0417382	0.112752	1.40941	58.9
2000	1150	67.8701	186.883	-830417	26.1296	100.435	2.213	48.4578	1.34683	18.1007	1.57512	0.0222768	8.515	6.47985	10.3678	3.49984	0.0435492	0.117872	1.4734	57.5
2000	1145	65.0484	179.155	-794706	25.0828	96.0849	2.231	48.5089	1.38797	18.0863	1.60548	0.0211651	8.70393	6.26194	10.1135	3.60512	0.0453539	0.122985	1.53732	56.2
2000	1140	62.4555	172.05	-761931	24.1207	92.0907	2.25	48.562	1.42762	18.0701	1.63505	0.0199975	8.88761	6.04909	9.86314	3.709	0.0471521	0.128091	1.60114	54.8
2000	1135	60.0648	165.495	-731750	23.2335	88.4112	2.269	48.6171	1.46574	18.052	1.66387	0.0187706	9.06609	5.84122	9.61665	3.81148	0.0489438	0.133189	1.66487	53.4
2000	1130	57.8534	159.429	-703869	22.4128	85.0109	2.288	48.6745	1.50223	18.0322	1.69198	0.0174785	9.23939	5.63821	9.37395	3.9126	0.050729	0.13828	1.72851	52.1
2000	1125	55.8017	153.798	-678038	21.6513	81.8589	2.306	48.7342	1.537	18.0106	1.7194	0.0161102	9.40749	5.43995	9.13493	4.01238	0.0525082	0.143365	1.79206	50.7
2000	1120	53.8923	148.554	-654034	20.9426	78.9283	2.325	48.7966	1.56991	17.9875	1.74612	0.0146451	9.5703	5.2463	8.89948	4.11086	0.0542819	0.148444	1.85555	49.4
2000	1115	52.1095	143.656	-631660	20.281	76.1948	2.344	48.8623	1.6007	17.9629	1.77214	0.013036	9.72756	5.05709	8.66745	4.20815	0.0560515	0.153523	1.91904	48.1
2000	1110	50.4373	139.06	-610720	19.6608	73.6338	2.364	48.9329	1.62884	17.9373	1.79734	0.0111465	9.87829	4.87201	8.43859	4.30451	0.0578214	0.158613	1.98266	46.8
2000	1105	48.857	134.718	-590997	19.0755	71.2169	2.384	49.0124	1.65292	17.9112	1.82137	0.00871114	10.0199	4.69049	8.21241	4.40056	0.0596017	0.163743	2.04679	45.5
2000	1100	47.3525	130.585	-572306	18.5198	68.9197	2.405	49.1053	1.6712	17.8847	1.84387	0.00584809	10.1495	4.51203	7.98842	4.49698	0.0614037	0.168946	2.11182	44.2
2000	1095	45.9091	126.625	-554476	17.9886	66.7203	2.428	49.2162	1.68168	17.8575	1.8645	0.00305956	10.2643	4.3363	7.76634	4.59442	0.0632399	0.174257	2.17822	43
2000	1090	44.5079	122.788	-537299	17.4756	64.5909	2.453	49.353	1.68105	17.829	1.88261	0.000949625	10.3588	4.16281	7.54599	4.69401	0.0651325	0.179743	2.24679	41.7
2000	1085	43.0756	118.888	-520046	16.9586	62.4263	2.483	49.557	1.65538	17.7982	1.89438	5.16734e-05	10.403	3.9889	7.32703	4.80164	0.0671903	0.18572	2.3215	40.6
2000	1080	41.3723	114.323	-500411	16.3655	59.8859	2.531	49.9784	1.55746	17.7632	1.88481	2.93068e-08	10.2815	3.80588	7.10939	4.93913	0.069818	0.193366	2.41708	39.8
2000	1075	39.692	109.834	-481261	15.7847	57.3917	2.583	50.4617	1.44231	17.7214	1.86783	0	10.1029	3.62771	6.89891	5.08363	0.0726209	0.201552	2.5194	39
2000	1070	38.1566	105.727	-463744	15.252	55.1159	2.632	50.9266	1.33632	17.672	1.85123	0	9.9274	3.45984	6.69748	5.22329	0.0753861	0.209662	2.62078	38.3
2000	1065	36.7499	101.958	-447673	14.7622	53.034	2.679	51.3729	1.23911	17.615	1.83524	0	9.75646	3.30158	6.50486	5.35795	0.0781098	0.217687	2.72109	37.6
2000	1060	35.4557	98.4842	-432866	14.3098	51.121	2.724	51.802	1.14975	17.5509	1.81984	0	9.59002	3.1522	6.32065	5.48783	0.0807945	0.225634	2.82042	36.9
2000	1055	34.2597	95.2697	-419163	13.8902	49.3556	2.766	52.2155	1.06743	17.4798	1.80501	0	9.42784	3.011	6.14443	5.61315	0.0834432	0.23351	2.91888	36.3
2000	1050	33.1502	92.2828	-406431	13.4995	47.7197	2.806	52.6147	0.991441	17.4024	1.79068	0	9.26964	2.87733	5.97579	5.73411	0.0860589	0.241326	3.01657	35.6
2000	1045	32.1168	89.497	-394557	13.1343	46.1981	2.845	53.0008	0.92116	17.3188	1.77682	0	9.11513	2.75063	5.81432	5.85096	0.0886449	0.249091	3.11363	35
2000	1040	31.151	86.8895	-383444	12.7917	44.7777	2.881	53.3749	0.856044	17.2296	1.76338	0	8.96398	2.63037	5.65965	5.96388	0.0912041	0.256814	3.21017	34.3
2000	1035	30.0166	83.87	-370195	12.3851	43.1208	2.909	53.7141	0.798921	17.1536	1.75037	0	8.79132	2.45952	5.53034	6.10938	0.0944238	0.266519	3.33149	33.3
2000	1030	29.0684	81.3264	-359140	12.0435	41.7405	2.935	54.0313	0.744033	17.0516	1.73927	0	8.63971	2.34107	5.40726	6.23303	0.0972833	0.275213	3.44016	32.6
2000	1025	28.1823	78.9465	-348800	11.7233	40.4519	2.959	54.3391	0.692413	16.9479	1.72833	0	8.49208	2.22864	5.28571	6.35351	0.100117	0.283866	3.54833	31.9
2000	1020	27.3521	76.7137	-339101	11.4223	39.2456	2.982	54.638	0.643862	16.8424	1.71753	0	8.3482	2.12188	5.16582	6.47089	0.102925	0.292482	3.65603	31.2
2000	1015	26.5722	74.6136	-329980	11.1388	38.1134	3.004	54.9282	0.598195	16.7353	1.70687	0	8.20785	2.02045	5.04769	6.58527	0.105711	0.301067	3.76333	30.5
2000	1010	25.8377	72.6333	-321383	10.8709	37.0481	3.024	55.2104	0.555236	16.6266	1.69635	0	8.07079	1.92404	4.93142	6.69673	0.108475	0.309625	3.87031	29.8
2000	1005	25.1444	70.7617	-313259	10.6172	36.0434	3.043	55.4848	0.514826	16.5164	1.68596	0	7.93682	1.83237	4.81706	6.80535	0.111218	0.318162	3.97703	29.2
2000	1000	24.4884	68.9889	-305564	10.3765	35.0937	3.061	55.7518	0.476813	16.4048	1.67567	0	7.80572	1.74514	4.70466	6.91121	0.113943	0.326685	4.08356	28.5
2000	995	23.8665	67.306	-298262	10.1475	34.1941	3.078	56.0118	0.441058	16.2917	1.66549	0	7.6773	1.66212	4.59426	7.01442	0.11665	0.335198	4.18997	27.8
2000	990	23.2756	65.7053	-291318	9.92927	33.3401	3.094	56.2651	0.407433	16.1774	1.6554	0	7.55135	1.58305	4.48586	7.11503	0.119342	0.343707	4.29634	27.2
2000	985	22.7131	64.18	-284700	9.72089	32.5279	3.109	56.512	0.375818	16.0618	1.64538	0	7.4277	1.50772	4.37949	7.21315	0.122019	0.352219	4.40274	26.6
2000	980	22.1767	62.7237	-278383	9.52154	31.7539	3.123	56.7528	0.346102	15.945	1.63542	0	7.30617	1.43591	4.27514	7.30883	0.124684	0.360739	4.50924	25.9
2000	975	21.6642	61.331	-272341	9.3305	31.0152	3.136	56.9878	0.318183	15.827	1.62549	0	7.1866	1.36744	4.17282	7.40216	0.127337	0.369273	4.61591	25.3
2000	970	21.1737	59.9969	-266554	9.14711	30.3088	3.148	57.2172	0.291966	15.7079	1.61559	0	7.06883	1.30211	4.07252	7.49321	0.12998	0.377827	4.72284	24.7
2000	965	20.7035	58.7169	-261000	8.97079	29.6323	3.159	57.4414	0.267363	15.5877	1.6057	0	6.9527	1.23978	3.97423	7.58205	0.132615	0.386407	4.83009	24.1
2000	960	20.2522	57.4871	-255664	8.801	28.9834	3.17	57.6604	0.244291	15.4665	1.59578	0	6.83806	1.18027	3.87794	7.66873	0.135242	0.395019	4.93774	23.5
2000	955	19.8182	56.3038	-250529	8.63727	28.36	3.179	57.8746	0.222676	15.3443	1.58584	0	6.72476	1.12345	3.78363	7.75333	0.137862	0.403669	5.04587	22.9
2000	950	19.4004	55.1637	-245580	8.47917	27.7604	3.188	58.0842	0.202446	15.2211	1.57583	0	6.61266	1.06918	3.69129	7.83591	0.140478	0.412363	5.15454	22.4
2000	945	18.9976	54.0638	-240804	8.3263	27.1828	3.195	58.2894	0.183535	15.0969	1.56575	0	6.50162	1.01734	3.60091	7.91651	0.143089	0.421107	5.26384	21.8
2000	940	18.6087	53.0014	-236189	8.1783	26.6257	3.202	58.4904	0.165881	14.9718	1.55556	0	6.39149	0.967814	3.51247	7.99519	0.145698	0.429907	5.37384	21.3
2000	935	18.2328	51.974	-231725	8.03485	26.0878	3.208	58.6874	0.149426	14.8457	1.54523	0	6.28213	0.920488	3.42595	8.07202	0.148304	0.438769	5.48461	20.7
2000	930	17.8691	50.9793	-227401	7.89564	25.5676	3.214	58.8806	0.134118	14.7187	1.53474	0	6.17338	0.875268	3.34135	8.14702	0.15091	0.4477	5.59625	20.2
2000	925	17.5167	50.0153	-223209	7.76041	25.0642	3.218	59.0702	0.119904	14.5907	1.52406	0	6.06509	0.83206	3.25865	8.22027	0.153516	0.456707	5.70883	19.6
2000	920	17.1749	49.08	-219139	7.6289	24.5763	3.222	59.2564	0.106737	14.4619	1.51314	0	5.95711	0.790781	3.17784	8.29179	0.156122	0.465795	5.82244	19.1
2000	915	16.8431	48.1718	-215185	7.50087	24.1031	3.225	59.4395	0.0945719	14.332	1.50194	0	5.84927	0.751352	3.0989	8.36164	0.15873	0.474972	5.93715	18.6
2000	910	16.5206	47.2888	-211339	7.37613	23.6436	3.227	59.6195	0.0833659	14.2012	1.49043	0	5.74141	0.713701	3.02184	8.42985	0.161341	0.484245	6.05306	18.1
2000	905	16.2068	46.4298	-207594	7.25446	23.1969	3.228	59.7969	0.0730783	14.0694	1.47856	0	5.63334	0.677763	2.94663	8.49647	0.163956	0.493621	6.17027	17.7
2000	900	15.9011	45.5932	-203945	7.13569	22.7623	3.229	59.9717	0.0636705	13.9366	1.46627	0	5.52489	0.643476	2.87328	8.56154	0.166574	0.503109	6.28886	17.2
spinel_0	thermodynamic	data	and	composition:
Pressure	Temperature	mass	S	H	V	Cp	formula	SiO2	TiO2	Al2O3	Fe2O3	Cr2O3	FeO	MgO	CaO	Na2O	K2O	P2O5	H2O
2000	1180	0.028654	0.066175	-319.146	0.007365	0.0338	Fe''0.24Mg0.78Fe'''0.20Al1.43Cr0.34Ti0.02O4	0	0.844159	44.4206	9.70007	15.5173	10.3506	19.1673	0	0	0	0	0
2000	1175	0.014799	0.034112	-163.858	0.003795	0.017409	Fe''0.25Mg0.77Fe'''0.21Al1.42Cr0.33Ti0.02O4	0	0.943711	44.0386	10.0612	15.2818	10.7575	18.9172	0	0	0	0	0
2000	1170	0.013851	0.031864	-152.398	0.003543	0.016246	Fe''0.26Mg0.76Fe'''0.22Al1.41Cr0.33Ti0.02O4	0	1.05398	43.6319	10.4382	15.0347	11.1823	18.6589	0	0	0	0	0
2000	1165	0.013053	0.029968	-142.655	0.00333	0.015263	Fe''0.27Mg0.76Fe'''0.22Al1.40Cr0.32Ti0.02O4	0	1.17675	43.1941	10.8344	14.7756	11.6284	18.3908	0	0	0	0	0
2000	1160	0.012381	0.028366	-134.329	0.00315	0.01443	Fe''0.28Mg0.75Fe'''0.23Al1.39Cr0.32Ti0.03O4	0	1.31431	42.7177	11.2537	14.5038	12.0998	18.1106	0	0	0	0	0
2000	1155	0.011816	0.027014	-127.189	0.002997	0.013723	Fe''0.29Mg0.74Fe'''0.24Al1.38Cr0.31Ti0.03O4	0	1.4697	42.193	11.7013	14.2186	12.6018	17.8156	0	0	0	0	0
2000	1150	0.011345	0.025882	-121.063	0.002868	0.013126	Fe''0.31Mg0.73Fe'''0.26Al1.37Cr0.31Ti0.03O4	0	1.64697	41.6069	12.1837	13.9188	13.141	17.5026	0	0	0	0	0
2000	1145	0.01096	0.024949	-115.821	0.002761	0.012627	Fe''0.32Mg0.72Fe'''0.27Al1.35Cr0.30Ti0.04O4	0	1.85184	40.942	12.7099	13.6027	13.7266	17.1669	0	0	0	0	0
2000	1140	0.010657	0.024202	-111.374	0.002674	0.01222	Fe''0.34Mg0.71Fe'''0.28Al1.33Cr0.30Ti0.04O4	0	2.09263	40.1727	13.2927	13.2681	14.3716	16.8023	0	0	0	0	0
2000	1135	0.010438	0.023645	-107.671	0.002608	0.011904	Fe''0.36Mg0.69Fe'''0.30Al1.31Cr0.29Ti0.05O4	0	2.38219	39.2604	13.9511	12.9115	15.0956	16.3993	0	0	0	0	0
2000	1130	0.010311	0.023295	-104.709	0.002563	0.011683	Fe''0.38Mg0.68Fe'''0.32Al1.28Cr0.28Ti0.06O4	0	2.74189	38.1418	14.7155	12.5278	15.9299	15.9431	0	0	0	0	0
2000	1125	0.010302	0.023204	-102.561	0.002544	0.011578	Fe''0.41Mg0.66Fe'''0.34Al1.25Cr0.28Ti0.07O4	0	3.21119	36.7025	15.6393	12.1081	16.9307	15.4081	0	0	0	0	0
2000	1120	0.010472	0.023502	-101.464	0.002564	0.011641	Fe''0.44Mg0.64Fe'''0.37Al1.19Cr0.27Ti0.08O4	0	3.87513	34.7035	16.8308	11.6337	18.2142	14.7426	0	0	0	0	0
2000	1115	0.011007	0.024583	-102.205	0.002662	0.01203	Fe''0.50Mg0.61Fe'''0.41Al1.10Cr0.26Ti0.11O4	0	4.96718	31.5283	18.5543	11.0474	20.0815	13.8213	0	0	0	0	0
2000	1110	0.012746	0.028244	-109.221	0.003016	0.013499	Fe''0.60Mg0.57Fe'''0.50Al0.93Cr0.24Ti0.17O4	0	7.25143	25.5324	21.4137	10.054	23.3914	12.3571	0	0	0	0	0
2000	1105	0.018174	0.039904	-141.271	0.0042	0.018559	Fe''0.74Mg0.52Fe'''0.58Al0.70Cr0.20Ti0.26O4	0	10.7278	18.451	24.2303	8.06968	27.6737	10.8475	0	0	0	0	0
2000	1100	0.027069	0.059051	-197.882	0.006171	0.027057	Fe''0.85Mg0.49Fe'''0.63Al0.55Cr0.15Ti0.34O4	0	13.6598	14.1253	25.479	5.79068	31.0106	9.93462	0	0	0	0	0
2000	1095	0.038721	0.084029	-272.175	0.008756	0.038205	Fe''0.94Mg0.46Fe'''0.65Al0.45Cr0.10Ti0.40O4	0	16.0166	11.425	25.9159	3.6737	33.6629	9.30591	0	0	0	0	0
2000	1090	0.056084	0.121112	-383.588	0.01261	0.054852	Fe''1.01Mg0.44Fe'''0.66Al0.38Cr0.05Ti0.45O4	0	17.9239	9.59968	25.9976	1.81636	35.8559	8.80659	0	0	0	0	0
2000	1085	0.108329	0.232769	-726.407	0.024253	0.105278	Fe''1.07Mg0.43Fe'''0.67Al0.34Cr0.01Ti0.49O4	0	19.2815	8.39489	26.0151	0.386381	37.544	8.37816	0	0	0	0	0
2000	1080	0.287752	0.615772	-1904.58	0.064183	0.278396	Fe''1.09Mg0.41Fe'''0.68Al0.32Cr0.00Ti0.50O4	0	19.445	7.94341	26.4112	0.00907388	38.1881	8.00327	0	0	0	0	0
2000	1075	0.322146	0.687084	-2109.01	0.071602	0.310468	Fe''1.10Mg0.39Fe'''0.70Al0.31Cr0.00Ti0.50O4	0	19.1877	7.73038	26.9801	0	38.4459	7.656	0	0	0	0	0
2000	1070	0.289833	0.61616	-1877.59	0.064204	0.27831	Fe''1.11Mg0.38Fe'''0.71Al0.31Cr0.00Ti0.49O4	0	18.9076	7.53989	27.5669	0	38.6587	7.3269	0	0	0	0	0
2000	1065	0.260334	0.55167	-1669.37	0.057482	0.249122	Fe''1.12Mg0.36Fe'''0.73Al0.30Cr0.00Ti0.48O4	0	18.6159	7.3639	28.1679	0	38.8382	7.01404	0	0	0	0	0
2000	1060	0.234749	0.495866	-1490.44	0.051671	0.223903	Fe''1.13Mg0.35Fe'''0.75Al0.29Cr0.00Ti0.48O4	0	18.3134	7.20021	28.7834	0	38.9869	6.71605	0	0	0	0	0
2000	1055	0.212527	0.447503	-1336.37	0.046638	0.202078	Fe''1.14Mg0.33Fe'''0.77Al0.29Cr0.00Ti0.47O4	0	18.0008	7.04713	29.4134	0	39.1069	6.43179	0	0	0	0	0
2000	1050	0.193167	0.405455	-1203.21	0.042266	0.183126	Fe''1.14Mg0.32Fe'''0.79Al0.28Cr0.00Ti0.46O4	0	17.6786	6.90332	30.0578	0	39.1999	6.16035	0	0	0	0	0
2000	1045	0.176237	0.368754	-1087.64	0.038452	0.166605	Fe''1.15Mg0.31Fe'''0.81Al0.28Cr0.00Ti0.46O4	0	17.3474	6.76769	30.7165	0	39.2675	5.90094	0	0	0	0	0
2000	1040	0.161367	0.336582	-986.891	0.03511	0.152139	Fe''1.15Mg0.30Fe'''0.83Al0.27Cr0.00Ti0.45O4	0	17.0077	6.63934	31.389	0	39.311	5.65289	0	0	0	0	0
2000	1035	0.155513	0.323267	-941.133	0.033728	0.146161	Fe''1.16Mg0.28Fe'''0.85Al0.27Cr0.00Ti0.44O4	0	16.7268	6.457	31.9846	0	39.477	5.35459	0	0	0	0	0
2000	1030	0.140295	0.290717	-841.612	0.030348	0.131531	Fe''1.17Mg0.27Fe'''0.87Al0.26Cr0.00Ti0.44O4	0	16.4076	6.32305	32.6346	0	39.5092	5.12552	0	0	0	0	0
2000	1025	0.128859	0.26618	-766.379	0.027803	0.120524	Fe''1.17Mg0.26Fe'''0.89Al0.26Cr0.00Ti0.43O4	0	16.0748	6.19956	33.3036	0	39.5161	4.90597	0	0	0	0	0
2000	1020	0.118729	0.244486	-700.19	0.025553	0.1108	Fe''1.17Mg0.25Fe'''0.91Al0.25Cr0.00Ti0.42O4	0	15.7291	6.08555	33.9912	0	39.4986	4.69553	0	0	0	0	0
2000	1015	0.10973	0.225246	-641.767	0.023559	0.102185	Fe''1.17Mg0.24Fe'''0.93Al0.25Cr0.00Ti0.41O4	0	15.3712	5.98018	34.6971	0	39.4577	4.49385	0	0	0	0	0
2000	1010	0.10171	0.208126	-590.019	0.021785	0.094524	Fe''1.17Mg0.23Fe'''0.95Al0.25Cr0.00Ti0.40O4	0	15.0016	5.88273	35.4208	0	39.3944	4.30059	0	0	0	0	0
2000	1005	0.09454	0.192845	-544.036	0.020202	0.087692	Fe''1.17Mg0.22Fe'''0.97Al0.24Cr0.00Ti0.39O4	0	14.6209	5.7926	36.1614	0	39.3096	4.11543	0	0	0	0	0
2000	1000	0.088111	0.179166	-503.048	0.018786	0.081581	Fe''1.17Mg0.21Fe'''0.99Al0.24Cr0.00Ti0.38O4	0	14.2299	5.70927	36.9185	0	39.2043	3.93809	0	0	0	0	0
2000	995	0.082332	0.166885	-466.406	0.017515	0.076099	Fe''1.17Mg0.20Fe'''1.02Al0.24Cr0.00Ti0.37O4	0	13.829	5.6323	37.691	0	39.0794	3.76828	0	0	0	0	0
2000	990	0.077123	0.15583	-433.555	0.016372	0.071168	Fe''1.17Mg0.19Fe'''1.04Al0.24Cr0.00Ti0.36O4	0	13.419	5.5613	38.4782	0	38.9358	3.60575	0	0	0	0	0
2000	985	0.072415	0.145853	-404.024	0.01534	0.06672	Fe''1.17Mg0.19Fe'''1.06Al0.23Cr0.00Ti0.35O4	0	13.0003	5.49595	39.2791	0	38.7744	3.45024	0	0	0	0	0
2000	980	0.068151	0.136825	-377.41	0.014407	0.062698	Fe''1.16Mg0.18Fe'''1.09Al0.23Cr0.00Ti0.34O4	0	12.5737	5.43596	40.0927	0	38.5961	3.3015	0	0	0	0	0
2000	975	0.06428	0.128639	-353.367	0.013561	0.059054	Fe''1.16Mg0.17Fe'''1.11Al0.23Cr0.00Ti0.33O4	0	12.1397	5.38109	40.9181	0	38.4018	3.15929	0	0	0	0	0
2000	970	0.060758	0.121199	-331.599	0.012793	0.055744	Fe''1.16Mg0.16Fe'''1.14Al0.23Cr0.00Ti0.32O4	0	11.699	5.33113	41.7542	0	38.1924	3.02337	0	0	0	0	0
2000	965	0.057548	0.114424	-311.853	0.012094	0.052732	Fe''1.15Mg0.16Fe'''1.16Al0.23Cr0.00Ti0.31O4	0	11.252	5.28589	42.5999	0	37.9687	2.89352	0	0	0	0	0
2000	960	0.054618	0.108245	-293.907	0.011457	0.049986	Fe''1.14Mg0.15Fe'''1.19Al0.22Cr0.00Ti0.29O4	0	10.7995	5.24519	43.4543	0	37.7315	2.7695	0	0	0	0	0
2000	955	0.051939	0.102601	-277.573	0.010876	0.04748	Fe''1.14Mg0.14Fe'''1.21Al0.22Cr0.00Ti0.28O4	0	10.3419	5.20887	44.3162	0	37.4819	2.65109	0	0	0	0	0
2000	950	0.049489	0.097439	-262.688	0.010344	0.04519	Fe''1.13Mg0.14Fe'''1.24Al0.22Cr0.00Ti0.27O4	0	9.87988	5.17678	45.1847	0	37.2206	2.53808	0	0	0	0	0
2000	945	0.047245	0.092714	-249.109	0.009858	0.043095	Fe''1.13Mg0.13Fe'''1.26Al0.22Cr0.00Ti0.26O4	0	9.41406	5.14878	46.0585	0	36.9484	2.43025	0	0	0	0	0
2000	940	0.04519	0.088387	-236.713	0.009413	0.041178	Fe''1.12Mg0.13Fe'''1.29Al0.22Cr0.00Ti0.25O4	0	8.94505	5.12469	46.9365	0	36.6664	2.32739	0	0	0	0	0
2000	935	0.043308	0.084423	-225.396	0.009007	0.039423	Fe''1.11Mg0.12Fe'''1.31Al0.22Cr0.00Ti0.23O4	0	8.47354	5.10434	47.8175	0	36.3753	2.22931	0	0	0	0	0
2000	930	0.041585	0.080794	-215.064	0.008635	0.037818	Fe''1.10Mg0.12Fe'''1.34Al0.22Cr0.00Ti0.22O4	0	8.00025	5.08754	48.7003	0	36.0761	2.1358	0	0	0	0	0
2000	925	0.04001	0.077473	-205.638	0.008295	0.036352	Fe''1.10Mg0.11Fe'''1.37Al0.22Cr0.00Ti0.21O4	0	7.52601	5.07404	49.5834	0	35.7699	2.04669	0	0	0	0	0
2000	920	0.038574	0.074438	-197.048	0.007985	0.035014	Fe''1.09Mg0.11Fe'''1.39Al0.22Cr0.00Ti0.19O4	0	7.05175	5.06359	50.4652	0	35.4576	1.9618	0	0	0	0	0
2000	915	0.037266	0.07167	-189.233	0.007703	0.033796	Fe''1.08Mg0.10Fe'''1.42Al0.22Cr0.00Ti0.18O4	0	6.57854	5.05583	51.344	0	35.1406	1.88095	0	0	0	0	0
2000	910	0.03608	0.069151	-182.139	0.007447	0.032691	Fe''1.07Mg0.10Fe'''1.44Al0.22Cr0.00Ti0.17O4	0	6.10759	5.05039	52.2179	0	34.8202	1.80398	0	0	0	0	0
2000	905	0.035008	0.066866	-175.72	0.007216	0.031692	Fe''1.06Mg0.09Fe'''1.47Al0.22Cr0.00Ti0.16O4	0	5.64034	5.04678	53.0844	0	34.4977	1.73076	0	0	0	0	0
2000	900	0.034044	0.064802	-169.93	0.007009	0.030793	Fe''1.05Mg0.09Fe'''1.49Al0.22Cr0.00Ti0.14O4	0	5.17843	5.04443	53.9411	0	34.1749	1.66113	0	0	0	0	0
olivine_0	thermodynamic	data	and	composition:
Pressure	Temperature	mass	S	H	V	Cp	formula	SiO2	TiO2	Al2O3	Fe2O3	Cr2O3	FeO	MgO	CaO	Na2O	K2O	P2O5	H2O
2000	1205	0.293147	0.714997	-3675.47	0.090571	0.368933	(Ca0.01Mg0.87Fe''0.13Mn0.00Co0.00Ni0.00)2SiO4	40.2305	0	0	0	0	12.9035	46.3982	0.467806	0	0	0	0
2000	1200	0.442546	1.07723	-5542.24	0.136598	0.556287	(Ca0.01Mg0.86Fe''0.14Mn0.00Co0.00Ni0.00)2SiO4	40.1955	0	0	0	0	13.0876	46.2454	0.471439	0	0	0	0
2000	1195	0.434771	1.05619	-5438.45	0.134067	0.545851	(Ca0.01Mg0.86Fe''0.14Mn0.00Co0.00Ni0.00)2SiO4	40.16	0	0	0	0	13.2747	46.0902	0.475077	0	0	0	0
2000	1190	0.427174	1.03564	-5336.95	0.131594	0.535652	(Ca0.01Mg0.86Fe''0.14Mn0.00Co0.00Ni0.00)2SiO4	40.1239	0	0	0	0	13.4649	45.9324	0.478721	0	0	0	0
2000	1185	0.065584	0.158651	-817.583	0.020173	0.082104	(Ca0.01Mg0.86Fe''0.14Mn0.00Co0.00Ni0.00)2SiO4	40.0683	0	0	0	0	13.7681	45.6951	0.46853	0	0	0	0
2000	1180	0.503784	1.21581	-6260.08	0.15466	0.629366	(Ca0.01Mg0.85Fe''0.15Mn0.00Co0.00Ni0.00)2SiO4	39.9913	0	0	0	0	14.1851	45.3649	0.458716	0	0	0	0
2000	1175	0.61293	1.47562	-7589.13	0.187772	0.764	(Ca0.01Mg0.85Fe''0.15Mn0.00Co0.00Ni0.00)2SiO4	39.9071	0	0	0	0	14.6398	45.0035	0.449607	0	0	0	0
2000	1170	0.550235	1.32143	-6788.02	0.168206	0.68429	(Ca0.01Mg0.84Fe''0.16Mn0.00Co0.00Ni0.00)2SiO4	39.8218	0	0	0	0	15.1007	44.6368	0.440685	0	0	0	0
2000	1165	0.496817	1.19019	-6106.21	0.151548	0.61643	(Ca0.01Mg0.84Fe''0.16Mn0.00Co0.00Ni0.00)2SiO4	39.7351	0	0	0	0	15.5685	44.2644	0.431946	0	0	0	0
2000	1160	0.450969	1.07765	-5521.6	0.137261	0.558231	(Ca0.01Mg0.83Fe''0.17Mn0.00Co0.00Ni0.00)2SiO4	39.647	0	0	0	0	16.0439	43.8856	0.423388	0	0	0	0
2000	1155	0.411362	0.980523	-5017.01	0.124927	0.507988	(Ca0.01Mg0.83Fe''0.17Mn0.00Co0.00Ni0.00)2SiO4	39.5573	0	0	0	0	16.5277	43.4999	0.415008	0	0	0	0
2000	1150	0.376951	0.896204	-4578.94	0.114216	0.464364	(Ca0.01Mg0.82Fe''0.18Mn0.00Co0.00Ni0.00)2SiO4	39.4659	0	0	0	0	17.0206	43.1067	0.406803	0	0	0	0
2000	1145	0.346905	0.822636	-4196.64	0.104869	0.426292	(Ca0.01Mg0.81Fe''0.19Mn0.00Co0.00Ni0.00)2SiO4	39.3727	0	0	0	0	17.5231	42.7055	0.398771	0	0	0	0
2000	1140	0.320555	0.758163	-3861.5	0.096675	0.392919	(Ca0.01Mg0.81Fe''0.19Mn0.00Co0.00Ni0.00)2SiO4	39.2774	0	0	0	0	18.0361	42.2956	0.390909	0	0	0	0
2000	1135	0.297363	0.701447	-3566.54	0.089464	0.363553	(Ca0.01Mg0.80Fe''0.20Mn0.00Co0.00Ni0.00)2SiO4	39.1801	0	0	0	0	18.5603	41.8764	0.383215	0	0	0	0
2000	1130	0.276889	0.651399	-3306.09	0.0831	0.337631	(Ca0.01Mg0.80Fe''0.20Mn0.00Co0.00Ni0.00)2SiO4	39.0805	0	0	0	0	19.0964	41.4474	0.375686	0	0	0	0
2000	1125	0.258778	0.607136	-3075.56	0.077468	0.314698	(Ca0.01Mg0.79Fe''0.21Mn0.00Co0.00Ni0.00)2SiO4	38.9784	0	0	0	0	19.6453	41.008	0.368318	0	0	0	0
2000	1120	0.242749	0.567959	-2871.28	0.072483	0.294393	(Ca0.00Mg0.78Fe''0.22Mn0.00Co0.00Ni0.00)2SiO4	38.8739	0	0	0	0	20.2077	40.5573	0.361107	0	0	0	0
2000	1115	0.228613	0.53339	-2690.73	0.068081	0.276469	(Ca0.00Mg0.78Fe''0.22Mn0.00Co0.00Ni0.00)2SiO4	38.7666	0	0	0	0	20.7844	40.0949	0.354048	0	0	0	0
2000	1110	0.216314	0.503263	-2532.99	0.064244	0.260841	(Ca0.00Mg0.77Fe''0.23Mn0.00Co0.00Ni0.00)2SiO4	38.6565	0	0	0	0	21.3761	39.6203	0.347133	0	0	0	0
2000	1105	0.205169	0.475958	-2389.81	0.060765	0.246671	(Ca0.00Mg0.76Fe''0.24Mn0.00Co0.00Ni0.00)2SiO4	38.5436	0	0	0	0	21.9824	39.1336	0.340349	0	0	0	0
2000	1100	0.195031	0.451117	-2259.35	0.057598	0.233773	(Ca0.00Mg0.75Fe''0.25Mn0.00Co0.00Ni0.00)2SiO4	38.428	0	0	0	0	22.6034	38.6349	0.333693	0	0	0	0
2000	1095	0.18649	0.430084	-2148.29	0.054916	0.222846	(Ca0.00Mg0.75Fe''0.25Mn0.00Co0.00Ni0.00)2SiO4	38.3097	0	0	0	0	23.2386	38.1246	0.327173	0	0	0	0
2000	1090	0.179697	0.413171	-2058.11	0.052759	0.214053	(Ca0.00Mg0.74Fe''0.26Mn0.00Co0.00Ni0.00)2SiO4	38.1891	0	0	0	0	23.8856	37.6044	0.320812	0	0	0	0
2000	1085	0.174575	0.400184	-1987.98	0.051104	0.2073	(Ca0.00Mg0.73Fe''0.27Mn0.00Co0.00Ni0.00)2SiO4	38.0699	0	0	0	0	24.5258	37.0897	0.314685	0	0	0	0
2000	1080	0.169297	0.386972	-1918.51	0.049432	0.200478	(Ca0.00Mg0.72Fe''0.28Mn0.00Co0.00Ni0.00)2SiO4	37.9678	0	0	0	0	25.074	36.6493	0.308967	0	0	0	0
2000	1075	0.158696	0.361719	-1790.29	0.046226	0.187435	(Ca0.00Mg0.72Fe''0.28Mn0.00Co0.00Ni0.00)2SiO4	37.873	0	0	0	0	25.5831	36.2405	0.303425	0	0	0	0
2000	1070	0.147878	0.336108	-1660.72	0.042972	0.174202	(Ca0.00Mg0.71Fe''0.29Mn0.00Co0.00Ni0.00)2SiO4	37.7784	0	0	0	0	26.0912	35.8325	0.297993	0	0	0	0
2000	1065	0.138863	0.314718	-1552.39	0.040255	0.163153	(Ca0.00Mg0.70Fe''0.30Mn0.00Co0.00Ni0.00)2SiO4	37.6835	0	0	0	0	26.6007	35.4232	0.292684	0	0	0	0
2000	1060	0.1312	0.296497	-1459.97	0.037941	0.153741	(Ca0.00Mg0.70Fe''0.30Mn0.00Co0.00Ni0.00)2SiO4	37.5881	0	0	0	0	27.1126	35.0118	0.287506	0	0	0	0
2000	1055	0.124576	0.280714	-1379.81	0.035938	0.14559	(Ca0.00Mg0.69Fe''0.31Mn0.00Co0.00Ni0.00)2SiO4	37.4921	0	0	0	0	27.628	34.5974	0.282462	0	0	0	0
2000	1050	0.11878	0.266875	-1309.41	0.034182	0.138444	(Ca0.00Mg0.69Fe''0.31Mn0.00Co0.00Ni0.00)2SiO4	37.3953	0	0	0	0	28.1476	34.1796	0.277552	0	0	0	0
2000	1045	0.113662	0.254624	-1246.98	0.032627	0.132118	(Ca0.00Mg0.68Fe''0.32Mn0.00Co0.00Ni0.00)2SiO4	37.2975	0	0	0	0	28.6721	33.7576	0.272775	0	0	0	0
2000	1040	0.109105	0.243692	-1191.15	0.03124	0.126473	(Ca0.00Mg0.67Fe''0.33Mn0.00Co0.00Ni0.00)2SiO4	37.1987	0	0	0	0	29.2021	33.3311	0.26813	0	0	0	0
feldspar_0	thermodynamic	data	and	composition:
Pressure	Temperature	mass	S	H	V	Cp	formula	SiO2	TiO2	Al2O3	Fe2O3	Cr2O3	FeO	MgO	CaO	Na2O	K2O	P2O5	H2O
2000	1180	1.9278	4.65834	-26560.3	0.71727	2.36904	K0.00Na0.16Ca0.84Al1.84Si2.16O8	46.9952	0	34.0878	0	0	0	0	17.1571	1.7569	0.00293458	0	0
2000	1175	2.35284	5.67743	-32428.6	0.875588	2.89017	K0.00Na0.16Ca0.84Al1.84Si2.16O8	47.0973	0	34.019	0	0	0	0	17.0765	1.80404	0.00310068	0	0
2000	1170	2.11179	5.08856	-29117.2	0.786036	2.59298	K0.00Na0.16Ca0.84Al1.84Si2.16O8	47.2	0	33.9498	0	0	0	0	16.9955	1.85145	0.00326815	0	0
2000	1165	1.9063	4.5869	-26293.8	0.709693	2.33968	K0.00Na0.17Ca0.83Al1.83Si2.17O8	47.3037	0	33.8799	0	0	0	0	16.9136	1.89931	0.00343736	0	0
2000	1160	1.72975	4.15616	-23867.5	0.644095	2.1221	K0.00Na0.17Ca0.83Al1.83Si2.17O8	47.4086	0	33.8092	0	0	0	0	16.8308	1.94776	0.00360867	0	0
2000	1155	1.57698	3.78367	-21767.6	0.587329	1.93386	K0.00Na0.18Ca0.82Al1.82Si2.18O8	47.5152	0	33.7374	0	0	0	0	16.7467	1.99694	0.00378249	0	0
2000	1150	1.44392	3.45947	-19938.3	0.537887	1.76994	K0.00Na0.18Ca0.82Al1.82Si2.18O8	47.6236	0	33.6643	0	0	0	0	16.6611	2.04699	0.00395921	0	0
2000	1145	1.32735	3.17562	-18335.4	0.49457	1.62636	K0.00Na0.19Ca0.81Al1.81Si2.19O8	47.7342	0	33.5898	0	0	0	0	16.5738	2.09806	0.00413926	0	0
2000	1140	1.22467	2.92576	-16923.2	0.456414	1.49991	K0.00Na0.19Ca0.81Al1.81Si2.19O8	47.8473	0	33.5136	0	0	0	0	16.4845	2.15026	0.00432307	0	0
2000	1135	1.13377	2.70472	-15672.9	0.422637	1.388	K0.00Na0.20Ca0.80Al1.80Si2.20O8	47.9631	0	33.4355	0	0	0	0	16.3931	2.20374	0.00451112	0	0
2000	1130	1.05295	2.5083	-14560.8	0.392601	1.2885	K0.00Na0.20Ca0.80Al1.80Si2.20O8	48.082	0	33.3554	0	0	0	0	16.2993	2.25863	0.0047039	0	0
2000	1125	0.98078	2.33304	-13567.8	0.365785	1.19968	K0.00Na0.21Ca0.79Al1.79Si2.21O8	48.2042	0	33.273	0	0	0	0	16.2028	2.31505	0.00490195	0	0
2000	1120	0.916161	2.1762	-12678.4	0.341775	1.12016	K0.00Na0.21Ca0.79Al1.79Si2.21O8	48.3301	0	33.1882	0	0	0	0	16.1035	2.37314	0.00510583	0	0
2000	1115	0.858339	2.03594	-11882.4	0.320291	1.04902	K0.00Na0.22Ca0.78Al1.78Si2.22O8	48.4598	0	33.1008	0	0	0	0	16.001	2.43305	0.00531619	0	0
2000	1110	0.807418	1.91243	-11181.5	0.301375	0.986371	K0.00Na0.22Ca0.78Al1.78Si2.22O8	48.5938	0	33.0105	0	0	0	0	15.8953	2.4949	0.00553379	0	0
2000	1105	0.763208	1.80515	-10572.9	0.284958	0.931968	K0.00Na0.23Ca0.77Al1.77Si2.23O8	48.7326	0	32.9169	0	0	0	0	15.7857	2.55896	0.00575976	0	0
2000	1100	0.725235	1.71291	-10050.3	0.270865	0.885227	K0.00Na0.23Ca0.77Al1.77Si2.23O8	48.8768	0	32.8197	0	0	0	0	15.6719	2.62554	0.0059957	0	0
2000	1095	0.694554	1.63814	-9628.43	0.259491	0.847423	K0.00Na0.24Ca0.76Al1.76Si2.24O8	49.0272	0	32.7184	0	0	0	0	15.5532	2.69495	0.00624364	0	0
2000	1090	0.673638	1.5866	-9341.62	0.251765	0.821562	K0.00Na0.24Ca0.75Al1.75Si2.25O8	49.1846	0	32.6123	0	0	0	0	15.429	2.7676	0.00650657	0	0
2000	1085	0.685752	1.61291	-9512.75	0.256389	0.835993	K0.00Na0.25Ca0.75Al1.75Si2.25O8	49.3515	0	32.4998	0	0	0	0	15.2972	2.84467	0.00679298	0	0
2000	1080	0.80482	1.89044	-11168	0.301034	0.980754	K0.00Na0.26Ca0.74Al1.74Si2.26O8	49.5359	0	32.3755	0	0	0	0	15.1516	2.92978	0.00712854	0	0
2000	1075	0.810076	1.90029	-11244.5	0.303138	0.986769	K0.00Na0.27Ca0.73Al1.73Si2.27O8	49.7299	0	32.2448	0	0	0	0	14.9985	3.01928	0.00748985	0	0
2000	1070	0.763567	1.78884	-10602.2	0.285867	0.929749	K0.00Na0.27Ca0.72Al1.72Si2.28O8	49.9288	0	32.1107	0	0	0	0	14.8415	3.1111	0.0078648	0	0
2000	1065	0.721023	1.68696	-10014.5	0.270069	0.877601	K0.00Na0.28Ca0.72Al1.72Si2.28O8	50.1326	0	31.9734	0	0	0	0	14.6806	3.20512	0.00825399	0	0
2000	1060	0.683	1.59591	-9489.27	0.255953	0.830997	K0.00Na0.29Ca0.71Al1.71Si2.29O8	50.3408	0	31.833	0	0	0	0	14.5162	3.30123	0.00865828	0	0
2000	1055	0.648888	1.51422	-9018.05	0.243292	0.789186	K0.00Na0.30Ca0.70Al1.70Si2.30O8	50.5534	0	31.6898	0	0	0	0	14.3484	3.39932	0.00907849	0	0
2000	1050	0.618172	1.44066	-8593.73	0.231895	0.751537	K0.00Na0.31Ca0.69Al1.69Si2.31O8	50.77	0	31.5438	0	0	0	0	14.1775	3.49925	0.00951538	0	0
2000	1045	0.590414	1.37417	-8210.27	0.221597	0.717511	K0.00Na0.32Ca0.68Al1.68Si2.32O8	50.9903	0	31.3953	0	0	0	0	14.0036	3.60089	0.00996967	0	0
2000	1040	0.565236	1.31384	-7862.45	0.21226	0.686647	K0.00Na0.33Ca0.67Al1.67Si2.33O8	51.214	0	31.2445	0	0	0	0	13.827	3.70409	0.010442	0	0
2000	1035	0.624699	1.44996	-8692.36	0.234688	0.758566	K0.00Na0.33Ca0.67Al1.67Si2.33O8	51.3979	0	31.1205	0	0	0	0	13.6817	3.7889	0.0109324	0	0
2000	1030	0.561518	1.30146	-7815.67	0.211046	0.681565	K0.00Na0.34Ca0.66Al1.66Si2.34O8	51.5933	0	30.9888	0	0	0	0	13.5275	3.87897	0.0114411	0	0
2000	1025	0.530953	1.22887	-7392.52	0.199651	0.644201	K0.00Na0.35Ca0.65Al1.65Si2.35O8	51.7942	0	30.8533	0	0	0	0	13.3688	3.97163	0.0119723	0	0
2000	1020	0.503358	1.16334	-7010.45	0.189364	0.61322	K0.00Na0.36Ca0.64Al1.64Si2.36O8	52.0006	0	30.7142	0	0	0	0	13.2059	4.06676	0.0125272	0	0
2000	1015	0.478388	1.10406	-6664.71	0.180058	0.582638	K0.00Na0.37Ca0.63Al1.63Si2.37O8	52.2122	0	30.5716	0	0	0	0	13.0389	4.16429	0.013107	0	0
2000	1010	0.455709	1.05022	-6350.67	0.171608	0.554867	K0.00Na0.37Ca0.62Al1.62Si2.38O8	52.4287	0	30.4256	0	0	0	0	12.8679	4.2641	0.013713	0	0
2000	1005	0.435053	1.00119	-6064.61	0.163914	0.529574	K0.00Na0.38Ca0.62Al1.62Si2.38O8	52.6499	0	30.2764	0	0	0	0	12.6932	4.36608	0.0143465	0	0
2000	1000	0.416186	0.956404	-5803.33	0.156887	0.506477	K0.00Na0.39Ca0.61Al1.61Si2.39O8	52.8756	0	30.1243	0	0	0	0	12.515	4.47009	0.0150087	0	0
2000	995	0.398909	0.91539	-5564.03	0.150455	0.485327	K0.00Na0.40Ca0.60Al1.60Si2.40O8	53.1055	0	29.9693	0	0	0	0	12.3335	4.57601	0.0157011	0	0
2000	990	0.383045	0.877728	-5344.32	0.14455	0.46591	K0.00Na0.41Ca0.59Al1.59Si2.41O8	53.3393	0	29.8116	0	0	0	0	12.1489	4.68373	0.0164251	0	0
2000	985	0.368444	0.843056	-5142.08	0.139117	0.44804	K0.00Na0.42Ca0.58Al1.58Si2.42O8	53.5767	0	29.6516	0	0	0	0	11.9615	4.79312	0.0171821	0	0
2000	980	0.354973	0.811059	-4955.49	0.134106	0.431556	K0.00Na0.43Ca0.57Al1.57Si2.43O8	53.8175	0	29.4892	0	0	0	0	11.7713	4.90405	0.0179737	0	0
2000	975	0.342516	0.781461	-4782.95	0.129473	0.416314	K0.00Na0.44Ca0.56Al1.56Si2.44O8	54.0614	0	29.3247	0	0	0	0	11.5787	5.01641	0.0188015	0	0
2000	970	0.330972	0.754022	-4623.06	0.125182	0.40219	K0.00Na0.45Ca0.55Al1.55Si2.45O8	54.3082	0	29.1583	0	0	0	0	11.3838	5.13007	0.0196673	0	0
2000	965	0.320253	0.728531	-4474.59	0.121198	0.389077	K0.00Na0.46Ca0.54Al1.54Si2.46O8	54.5577	0	28.99	0	0	0	0	11.1868	5.24492	0.0205727	0	0
2000	960	0.310279	0.7048	-4336.46	0.117492	0.376878	K0.00Na0.47Ca0.53Al1.53Si2.47O8	54.8095	0	28.8202	0	0	0	0	10.9879	5.36085	0.0215197	0	0
2000	955	0.300984	0.682668	-4207.72	0.11404	0.365509	K0.00Na0.48Ca0.52Al1.52Si2.48O8	55.0634	0	28.6489	0	0	0	0	10.7874	5.47775	0.0225103	0	0
2000	950	0.292305	0.661988	-4087.52	0.110817	0.354894	K0.00Na0.49Ca0.51Al1.51Si2.49O8	55.3193	0	28.4763	0	0	0	0	10.5853	5.59552	0.0235465	0	0
2000	945	0.284188	0.642633	-3975.12	0.107804	0.34497	K0.00Na0.50Ca0.50Al1.50Si2.50O8	55.577	0	28.3026	0	0	0	0	10.3818	5.71407	0.0246306	0	0
2000	940	0.276586	0.624489	-3869.85	0.104983	0.335675	K0.00Na0.51Ca0.49Al1.49Si2.51O8	55.8361	0	28.1277	0	0	0	0	10.1771	5.83328	0.0257648	0	0
2000	935	0.269457	0.607456	-3771.14	0.102339	0.32696	K0.00Na0.52Ca0.48Al1.48Si2.52O8	56.0966	0	27.952	0	0	0	0	9.97131	5.95309	0.0269518	0	0
2000	930	0.262762	0.591442	-3678.45	0.099856	0.318776	K0.00Na0.53Ca0.47Al1.47Si2.53O8	56.3583	0	27.7755	0	0	0	0	9.76462	6.07341	0.028194	0	0
2000	925	0.256467	0.576369	-3591.32	0.097523	0.311084	K0.00Na0.54Ca0.46Al1.46Si2.54O8	56.621	0	27.5983	0	0	0	0	9.55712	6.19415	0.0294944	0	0
2000	920	0.250543	0.562164	-3509.32	0.095328	0.303846	K0.00Na0.55Ca0.45Al1.45Si2.55O8	56.8845	0	27.4205	0	0	0	0	9.34893	6.31526	0.0308558	0	0
2000	915	0.244963	0.548762	-3432.09	0.093261	0.297029	K0.00Na0.56Ca0.44Al1.44Si2.56O8	57.1487	0	27.2421	0	0	0	0	9.14017	6.43666	0.0322815	0	0
2000	910	0.239701	0.536106	-3359.29	0.091313	0.290603	K0.00Na0.57Ca0.43Al1.43Si2.57O8	57.4136	0	27.0634	0	0	0	0	8.93094	6.55829	0.0337747	0	0
2000	905	0.234737	0.524145	-3290.61	0.089476	0.284542	K0.00Na0.58Ca0.42Al1.42Si2.58O8	57.6789	0	26.8844	0	0	0	0	8.72133	6.68009	0.0353391	0	0
2000	900	0.23005	0.512831	-3225.79	0.087743	0.278822	K0.00Na0.59Ca0.41Al1.41Si2.59O8	57.9445	0	26.7051	0	0	0	0	8.51143	6.80201	0.0369784	0	0
clinopyroxene_0	thermodynamic	data	and	composition:
Pressure	Temperature	mass	S	H	V	Cp	structure	formula	SiO2	TiO2	Al2O3	Fe2O3	Cr2O3	FeO	MgO	CaO	Na2O	K2O	P2O5	H2O
2000	1185	2.70867	6.34306	-35092.2	0.84191	3.2299	cpx	Na0.01Ca0.83Fe''0.12Mg0.88Fe'''0.04Ti0.01Al0.25Si1.85O6	50.6845	0.466794	5.71436	1.41943	0	4.08905	16.2561	21.1965	0.173219	0	0	0
2000	1180	2.51344	5.8754	-32533.3	0.780411	2.99402	cpx	Na0.01Ca0.83Fe''0.13Mg0.88Fe'''0.04Ti0.01Al0.25Si1.85O6	50.5495	0.513374	5.79846	1.46131	0	4.20917	16.1464	21.1435	0.178342	0	0	0
2000	1175	2.13715	4.98673	-27634.6	0.662881	2.5431	cpx	Na0.01Ca0.83Fe''0.13Mg0.87Fe'''0.04Ti0.02Al0.25Si1.84O6	50.4321	0.565079	5.8429	1.50163	0	4.33905	16.0481	21.0879	0.183204	0	0	0
2000	1170	1.90246	4.43099	-24574.5	0.589455	2.26139	cpx	Na0.01Ca0.82Fe''0.14Mg0.87Fe'''0.04Ti0.02Al0.25Si1.84O6	50.3086	0.620618	5.89061	1.54265	0	4.46931	15.9467	21.0334	0.188132	0	0	0
2000	1165	1.70252	3.95797	-21968.5	0.526926	2.02149	cpx	Na0.01Ca0.82Fe''0.14Mg0.87Fe'''0.04Ti0.02Al0.26Si1.84O6	50.1786	0.680347	5.94185	1.58453	0	4.59997	15.8416	20.98	0.193143	0	0	0
2000	1160	1.53083	3.55219	-19731.9	0.473257	1.81558	cpx	Na0.01Ca0.82Fe''0.15Mg0.86Fe'''0.04Ti0.02Al0.26Si1.83O6	50.0412	0.744681	5.99695	1.62741	0	4.73098	15.7325	20.928	0.198253	0	0	0
2000	1155	1.38238	3.20165	-17798.7	0.426867	1.6376	cpx	Na0.01Ca0.82Fe''0.15Mg0.85Fe'''0.05Ti0.02Al0.26Si1.83O6	49.8958	0.814109	6.05628	1.67147	0	4.86227	15.6191	20.8774	0.203476	0	0	0
2000	1150	1.2532	2.89691	-16117.1	0.386515	1.48279	cpx	Na0.01Ca0.82Fe''0.15Mg0.85Fe'''0.05Ti0.02Al0.26Si1.83O6	49.7415	0.889214	6.12032	1.71687	0	4.9937	15.5008	20.8288	0.20883	0	0	0
2000	1145	1.14015	2.63048	-14646.2	0.351216	1.34736	cpx	Na0.02Ca0.82Fe''0.16Mg0.84Fe'''0.05Ti0.03Al0.27Si1.82O6	49.5771	0.970698	6.18962	1.76384	0	5.12505	15.377	20.7823	0.21433	0	0	0
2000	1140	1.04072	2.39636	-13353.1	0.320178	1.22828	cpx	Na0.02Ca0.82Fe''0.16Mg0.84Fe'''0.05Ti0.03Al0.27Si1.82O6	49.4014	1.05942	6.26489	1.81261	0	5.25605	15.2471	20.7386	0.219994	0	0	0
2000	1135	0.952882	2.18971	-12211	0.292764	1.12311	cpx	Na0.02Ca0.82Fe''0.17Mg0.83Fe'''0.05Ti0.03Al0.28Si1.81O6	49.2126	1.15646	6.347	1.86347	0	5.38631	15.1102	20.6981	0.225841	0	0	0
2000	1130	0.874979	2.0066	-11198.6	0.268457	1.02986	cpx	Na0.02Ca0.82Fe''0.17Mg0.82Fe'''0.05Ti0.04Al0.28Si1.81O6	49.0087	1.26318	6.43707	1.91677	0	5.51531	14.9654	20.6617	0.23189	0	0	0
2000	1125	0.805672	1.84382	-10298.2	0.246834	0.946909	cpx	Na0.02Ca0.82Fe''0.17Mg0.81Fe'''0.05Ti0.04Al0.28Si1.80O6	48.7871	1.38133	6.53655	1.97291	0	5.64238	14.8113	20.6302	0.238164	0	0	0
2000	1120	0.74387	1.69877	-9495.49	0.227552	0.87294	cpx	Na0.02Ca0.82Fe''0.18Mg0.81Fe'''0.06Ti0.04Al0.29Si1.79O6	48.5442	1.51326	6.64736	2.03244	0	5.76659	14.6464	20.605	0.244688	0	0	0
2000	1115	0.688703	1.56936	-8779.16	0.210336	0.806898	cpx	Na0.02Ca0.82Fe''0.18Mg0.80Fe'''0.06Ti0.05Al0.30Si1.79O6	48.2754	1.6621	6.77207	2.09602	0	5.88672	14.4685	20.5877	0.251487	0	0	0
2000	1110	0.639676	1.45437	-8142.6	0.195026	0.748174	cpx	Na0.02Ca0.82Fe''0.19Mg0.79Fe'''0.06Ti0.05Al0.30Si1.78O6	47.9748	1.83184	6.91389	2.1644	0	6.00113	14.2753	20.5801	0.258583	0	0	0
2000	1105	0.597779	1.35596	-7598.11	0.181914	0.697892	cpx	Na0.02Ca0.82Fe''0.19Mg0.78Fe'''0.06Ti0.06Al0.31Si1.77O6	47.6367	2.02661	7.07575	2.23808	0	6.10809	14.0647	20.5841	0.265976	0	0	0
2000	1100	0.561499	1.27059	-7126.2	0.170531	0.654253	cpx	Na0.02Ca0.82Fe''0.19Mg0.77Fe'''0.06Ti0.06Al0.32Si1.76O6	47.2544	2.25141	7.26121	2.31761	0	6.20556	13.8342	20.6019	0.273651	0	0	0
2000	1095	0.528146	1.19209	-6692.53	0.160053	0.614093	cpx	Na0.02Ca0.82Fe''0.20Mg0.75Fe'''0.07Ti0.07Al0.33Si1.74O6	46.819	2.51278	7.47506	2.40361	0	6.29098	13.5807	20.6363	0.281576	0	0	0
2000	1090	0.496653	1.11803	-6283.54	0.150153	0.57617	cpx	Na0.02Ca0.83Fe''0.20Mg0.74Fe'''0.07Ti0.08Al0.34Si1.73O6	46.3266	2.8143	7.71908	2.49549	0	6.36261	13.3039	20.6884	0.289638	0	0	0
2000	1085	0.46948	1.05411	-5931.1	0.141635	0.543522	cpx	Na0.02Ca0.83Fe''0.20Mg0.73Fe'''0.07Ti0.09Al0.35Si1.71O6	45.8996	3.07894	7.92171	2.57405	0	6.44177	13.0586	20.7282	0.297085	0	0	0
2000	1080	0.450506	1.01	-5687.62	0.135951	0.521531	cpx	Na0.02Ca0.82Fe''0.21Mg0.73Fe'''0.07Ti0.08Al0.34Si1.72O6	46.202	2.88047	7.69831	2.5431	0	6.65502	13.1347	20.5857	0.300711	0	0	0
2000	1075	0.399174	0.893812	-5037.1	0.120562	0.46232	cpx	Na0.02Ca0.82Fe''0.22Mg0.74Fe'''0.07Ti0.07Al0.32Si1.74O6	46.6752	2.57684	7.37549	2.48024	0	6.9083	13.2944	20.3867	0.302813	0	0	0
2000	1070	0.343502	0.768093	-4332.04	0.103805	0.397943	cpx	Na0.02Ca0.81Fe''0.22Mg0.75Fe'''0.07Ti0.07Al0.31Si1.76O6	47.0622	2.33071	7.10304	2.42533	0	7.15284	13.4226	20.1984	0.304889	0	0	0
2000	1065	0.295229	0.659175	-3720.73	0.089247	0.342055	cpx	Na0.02Ca0.80Fe''0.23Mg0.75Fe'''0.07Ti0.06Al0.30Si1.77O6	47.3892	2.12421	6.86567	2.37622	0	7.39284	13.5286	20.0163	0.306966	0	0	0
2000	1060	0.253716	0.565609	-3195.15	0.076712	0.293957	cpx	Na0.02Ca0.79Fe''0.24Mg0.76Fe'''0.07Ti0.05Al0.29Si1.78O6	47.6735	1.94573	6.65323	2.3312	0	7.63152	13.619	19.8368	0.309029	0	0	0
2000	1055	0.217989	0.485184	-2742.98	0.065914	0.252542	cpx	Na0.02Ca0.79Fe''0.25Mg0.76Fe'''0.06Ti0.05Al0.28Si1.79O6	47.9255	1.78823	6.4595	2.2892	0	7.87111	13.6979	19.6575	0.311055	0	0	0
2000	1050	0.187165	0.415892	-2353.02	0.056591	0.216799	cpx	Na0.02Ca0.78Fe''0.25Mg0.77Fe'''0.06Ti0.05Al0.28Si1.80O6	48.1524	1.64709	6.28033	2.24949	0	8.11348	13.768	19.4762	0.313021	0	0	0
2000	1045	0.160486	0.35601	-2015.67	0.048518	0.185857	cpx	Na0.02Ca0.77Fe''0.26Mg0.77Fe'''0.06Ti0.04Al0.27Si1.80O6	48.3588	1.51907	6.11275	2.21152	0	8.36033	13.8316	19.2911	0.314896	0	0	0
2000	1040	0.137317	0.304095	-1722.88	0.041506	0.158986	cpx	Na0.02Ca0.76Fe''0.27Mg0.77Fe'''0.06Ti0.04Al0.26Si1.81O6	48.5484	1.40178	5.95453	2.17484	0	8.6135	13.8904	19.1	0.316645	0	0	0
2000	1035	0.361228	0.815343	-4287.83	0.107819	0.428017	cpx	Na0.01Ca0.20Fe''0.56Mg1.12Fe'''0.04Ti0.01Al0.17Si1.89O6	50.9221	0.284898	3.94857	1.32774	0	18.1711	20.2988	4.94983	0.0969805	0	0	0
2000	1030	0.252316	0.568076	-2989.34	0.07523	0.298504	cpx	Na0.01Ca0.20Fe''0.57Mg1.12Fe'''0.04Ti0.01Al0.17Si1.89O6	50.9019	0.270175	3.89954	1.32233	0	18.4362	20.1403	4.9319	0.0976461	0	0	0
2000	1025	0.23197	0.520947	-2742.87	0.069087	0.274008	cpx	Na0.01Ca0.20Fe''0.58Mg1.11Fe'''0.04Ti0.01Al0.17Si1.89O6	50.8806	0.255746	3.85129	1.31676	0	18.7106	19.9852	4.90155	0.0981666	0	0	0
2000	1020	0.213679	0.478654	-2521.44	0.063567	0.252011	cpx	Na0.01Ca0.19Fe''0.59Mg1.10Fe'''0.04Ti0.01Al0.17Si1.89O6	50.8581	0.241632	3.80379	1.31107	0	18.9942	19.8329	4.85981	0.0985482	0	0	0
2000	1015	0.197207	0.44063	-2322.14	0.058599	0.232221	cpx	Na0.01Ca0.19Fe''0.60Mg1.09Fe'''0.04Ti0.01Al0.17Si1.90O6	50.8341	0.227857	3.75701	1.30527	0	19.2868	19.6825	4.80773	0.0987989	0	0	0
2000	1010	0.18234	0.406371	-2142.4	0.054117	0.214378	cpx	Na0.01Ca0.19Fe''0.61Mg1.09Fe'''0.04Ti0.01Al0.16Si1.90O6	50.8085	0.214446	3.71094	1.29939	0	19.5882	19.5331	4.74647	0.098928	0	0	0
2000	1005	0.168896	0.375443	-1979.96	0.050066	0.198258	cpx	Na0.01Ca0.19Fe''0.62Mg1.08Fe'''0.04Ti0.01Al0.16Si1.90O6	50.7811	0.201422	3.66558	1.29349	0	19.8981	19.3841	4.67715	0.0989458	0	0	0
2000	1000	0.156716	0.347465	-1832.89	0.046397	0.183666	cpx	Na0.01Ca0.18Fe''0.63Mg1.07Fe'''0.04Ti0.01Al0.16Si1.90O6	50.7519	0.188805	3.62095	1.28758	0	20.2162	19.2348	4.60087	0.0988628	0	0	0
2000	995	0.145657	0.322107	-1699.47	0.043068	0.170431	cpx	Na0.01Ca0.18Fe''0.64Mg1.07Fe'''0.04Ti0.00Al0.16Si1.90O6	50.7207	0.176611	3.57706	1.28169	0	20.5421	19.0845	4.51863	0.0986891	0	0	0
2000	990	0.135599	0.299076	-1578.2	0.040042	0.158401	cpx	Na0.01Ca0.18Fe''0.66Mg1.06Fe'''0.04Ti0.00Al0.16Si1.90O6	50.6875	0.164853	3.53391	1.27587	0	20.8756	18.9325	4.43138	0.0984343	0	0	0
2000	985	0.126431	0.278119	-1467.76	0.037285	0.147446	cpx	Na0.01Ca0.17Fe''0.67Mg1.05Fe'''0.04Ti0.00Al0.15Si1.90O6	50.652	0.153542	3.4915	1.27013	0	21.2163	18.7785	4.33997	0.0981074	0	0	0
2000	980	0.118059	0.25901	-1366.99	0.034768	0.13745	cpx	Na0.01Ca0.17Fe''0.68Mg1.04Fe'''0.04Ti0.00Al0.15Si1.91O6	50.6143	0.142684	3.44984	1.26449	0	21.5639	18.6218	4.24517	0.0977164	0	0	0
2000	975	0.110399	0.241553	-1274.87	0.032467	0.128311	cpx	Na0.01Ca0.17Fe''0.69Mg1.04Fe'''0.04Ti0.00Al0.15Si1.91O6	50.5744	0.132282	3.40892	1.25898	0	21.9183	18.4623	4.14765	0.0972687	0	0	0
2000	970	0.103377	0.225575	-1190.5	0.030359	0.11994	cpx	Na0.01Ca0.16Fe''0.70Mg1.03Fe'''0.04Ti0.00Al0.15Si1.91O6	50.5321	0.122339	3.36872	1.25361	0	22.2791	18.2994	4.048	0.0967707	0	0	0
2000	965	0.096928	0.210923	-1113.09	0.028424	0.112258	cpx	Na0.01Ca0.16Fe''0.72Mg1.02Fe'''0.04Ti0.00Al0.15Si1.91O6	50.4875	0.112852	3.32923	1.24838	0	22.6462	18.1329	3.94675	0.096228	0	0	0
2000	960	0.090993	0.197461	-1041.93	0.026645	0.105194	cpx	Na0.01Ca0.16Fe''0.73Mg1.01Fe'''0.04Ti0.00Al0.15Si1.91O6	50.4405	0.10382	3.29042	1.24332	0	23.0193	17.9626	3.84436	0.0956455	0	0	0
2000	955	0.085523	0.18507	-976.39	0.025005	0.098687	cpx	Na0.01Ca0.15Fe''0.74Mg1.01Fe'''0.04Ti0.00Al0.15Si1.91O6	50.3912	0.0952384	3.25227	1.23842	0	23.3983	17.7884	3.74121	0.0950275	0	0	0
2000	950	0.08047	0.173644	-915.927	0.023492	0.092682	cpx	Na0.01Ca0.15Fe''0.76Mg1.00Fe'''0.04Ti0.00Al0.14Si1.91O6	50.3396	0.0871018	3.21474	1.23367	0	23.7829	17.61	3.63767	0.0943777	0	0	0
2000	945	0.075794	0.163088	-860.044	0.022092	0.087129	cpx	Na0.01Ca0.14Fe''0.77Mg0.99Fe'''0.04Ti0.00Al0.14Si1.91O6	50.2857	0.0794041	3.17779	1.22909	0	24.173	17.4274	3.53402	0.0936992	0	0	0
2000	940	0.071458	0.153317	-808.297	0.020795	0.081986	cpx	Na0.01Ca0.14Fe''0.78Mg0.98Fe'''0.04Ti0.00Al0.14Si1.91O6	50.2295	0.0721379	3.14138	1.22465	0	24.5682	17.2405	3.43054	0.0929947	0	0	0
2000	935	0.067431	0.144255	-760.293	0.019592	0.077212	cpx	Na0.01Ca0.14Fe''0.80Mg0.97Fe'''0.04Ti0.00Al0.14Si1.91O6	50.1713	0.0652958	3.10545	1.22034	0	24.9685	17.0494	3.32746	0.0922664	0	0	0
2000	930	0.063682	0.135836	-715.675	0.018473	0.072772	cpx	Na0.01Ca0.13Fe''0.81Mg0.96Fe'''0.03Ti0.00Al0.14Si1.92O6	50.111	0.0588694	3.06994	1.21614	0	25.3734	16.8542	3.22497	0.0915162	0	0	0
2000	925	0.060186	0.127996	-674.123	0.017429	0.068636	cpx	Na0.01Ca0.13Fe''0.83Mg0.95Fe'''0.03Ti0.00Al0.14Si1.92O6	50.0487	0.05285	3.03481	1.21203	0	25.7828	16.6548	3.12326	0.0907459	0	0	0
2000	920	0.056917	0.120681	-635.348	0.016455	0.064773	cpx	Na0.01Ca0.12Fe''0.84Mg0.94Fe'''0.03Ti0.00Al0.14Si1.92O6	49.9846	0.0472287	2.99998	1.20798	0	26.1961	16.4516	3.02249	0.0899567	0	0	0
2000	915	0.053854	0.113841	-599.089	0.015543	0.061158	cpx	Na0.01Ca0.12Fe''0.85Mg0.93Fe'''0.03Ti0.00Al0.13Si1.92O6	49.9189	0.0419962	2.96537	1.20394	0	26.6131	16.2448	2.9228	0.0891498	0	0	0
2000	910	0.050977	0.107431	-565.105	0.014687	0.057766	cpx	Na0.01Ca0.12Fe''0.87Mg0.92Fe'''0.03Ti0.00Al0.13Si1.92O6	49.8518	0.0371431	2.9309	1.19987	0	27.0331	16.0346	2.82432	0.0883264	0	0	0
2000	905	0.048267	0.101408	-533.182	0.013883	0.054578	cpx	Na0.01Ca0.11Fe''0.89Mg0.91Fe'''0.03Ti0.00Al0.13Si1.92O6	49.7834	0.0326595	2.89649	1.19571	0	27.4556	15.8214	2.72717	0.0874873	0	0	0
2000	900	0.045709	0.095735	-503.123	0.013124	0.051572	cpx	Na0.01Ca0.11Fe''0.90Mg0.90Fe'''0.03Ti0.00Al0.13Si1.92O6	49.7141	0.0285356	2.86203	1.19139	0	27.8801	15.6058	2.63144	0.0866333	0	0	0
Title:	Allan	et	al.	1989	(see	Ghiorso	1997)
Phase	Masses:
Pressure	Temperature	mass	liquid_0	olivine_0	clinopyroxene_0	feldspar_0	spinel_0
2000	1400	101.19	101.19	0	0	0	0
2000	1400	101.19	101.19	0	0	0	0
2000	1395	101.19	101.19	0	0	0	0
2000	1390	101.19	101.19	0	0	0	0
2000	1385	101.19	101.19	0	0	0	0
2000	1380	101.19	101.19	0	0	0	0
2000	1375	101.19	101.19	0	0	0	0
2000	1370	101.19	101.19	0	0	0	0
2000	1365	101.191	101.191	0	0	0	0
2000	1360	101.191	101.191	0	0	0	0
2000	1355	101.191	101.191	0	0	0	0
2000	1350	101.191	101.191	0	0	0	0
2000	1345	101.191	101.191	0	0	0	0
2000	1340	101.191	101.191	0	0	0	0
2000	1335	101.191	101.191	0	0	0	0
2000	1330	101.191	101.191	0	0	0	0
2000	1325	101.192	101.192	0	0	0	0
2000	1320	101.192	101.192	0	0	0	0
2000	1315	101.192	101.192	0	0	0	0
2000	1310	101.192	101.192	0	0	0	0
2000	1305	101.192	101.192	0	0	0	0
2000	1300	101.192	101.192	0	0	0	0
2000	1295	101.192	101.192	0	0	0	0
2000	1290	101.193	101.193	0	0	0	0
2000	1285	101.193	101.193	0	0	0	0
2000	1280	101.193	101.193	0	0	0	0
2000	1275	101.193	101.193	0	0	0	0
2000	1270	101.193	101.193	0	0	0	0
2000	1265	101.194	101.194	0	0	0	0
2000	1260	101.194	101.194	0	0	0	0
2000	1255	101.194	101.194	0	0	0	0
2000	1250	101.194	101.194	0	0	0	0
2000	1245	101.194	101.194	0	0	0	0
2000	1240	101.195	101.195	0	0	0	0
2000	1235	101.195	101.195	0	0	0	0
2000	1230	101.195	101.195	0	0	0	0
2000	1225	101.195	101.195	0	0	0	0
2000	1220	101.196	101.196	0	0	0	0
2000	1215	101.196	101.196	0	0	0	0
2000	1210	101.196	101.196	0	0	0	0
2000	1205	101.196	100.903	0.293147	0	0	0
2000	1200	100.903	100.461	0.442546	0	0	0
2000	1195	100.461	100.027	0.434771	0	0	0
2000	1190	100.027	99.6	0.427174	0	0	0
2000	1185	99.6016	96.8273	0.065584	2.70867	0	0
2000	1180	96.8292	91.8555	0.503784	2.51344	1.9278	0.028654
2000	1175	91.859	86.7412	0.61293	2.13715	2.35284	0.014799
2000	1170	86.7447	82.1664	0.550235	1.90246	2.11179	0.013851
2000	1165	82.1699	78.0512	0.496817	1.70252	1.9063	0.013053
2000	1160	78.0548	74.3309	0.450969	1.53083	1.72975	0.012381
2000	1155	74.3345	70.9519	0.411362	1.38238	1.57698	0.011816
2000	1150	70.9556	67.8701	0.376951	1.2532	1.44392	0.011345
2000	1145	67.8738	65.0484	0.346905	1.14015	1.32735	0.01096
2000	1140	65.0521	62.4555	0.320555	1.04072	1.22467	0.010657
2000	1135	62.4593	60.0648	0.297363	0.952882	1.13377	0.010438
2000	1130	60.0686	57.8534	0.276889	0.874979	1.05295	0.010311
2000	1125	57.8572	55.8017	0.258778	0.805672	0.98078	0.010302
2000	1120	55.8055	53.8923	0.242749	0.74387	0.916161	0.010472
2000	1115	53.8961	52.1095	0.228613	0.688703	0.858339	0.011007
2000	1110	52.1134	50.4373	0.216314	0.639676	0.807418	0.012746
2000	1105	50.4414	48.857	0.205169	0.597779	0.763208	0.018174
2000	1100	48.8613	47.3525	0.195031	0.561499	0.725235	0.027069
2000	1095	47.357	45.9091	0.18649	0.528146	0.694554	0.038721
2000	1090	45.914	44.5079	0.179697	0.496653	0.673638	0.056084
2000	1085	44.5137	43.0756	0.174575	0.46948	0.685752	0.108329
2000	1080	43.0847	41.3723	0.169297	0.450506	0.80482	0.287752
2000	1075	41.3821	39.692	0.158696	0.399174	0.810076	0.322146
2000	1070	39.7013	38.1566	0.147878	0.343502	0.763567	0.289833
2000	1065	38.1654	36.7499	0.138863	0.295229	0.721023	0.260334
2000	1060	36.7583	35.4557	0.1312	0.253716	0.683	0.234749
2000	1055	35.4637	34.2597	0.124576	0.217989	0.648888	0.212527
2000	1050	34.2675	33.1502	0.11878	0.187165	0.618172	0.193167
2000	1045	33.1576	32.1168	0.113662	0.160486	0.590414	0.176237
2000	1040	32.124	31.151	0.109105	0.137317	0.565236	0.161367
2000	1035	31.158	30.0166	0	0.361228	0.624699	0.155513
2000	1030	30.0225	29.0684	0	0.252316	0.561518	0.140295
2000	1025	29.0741	28.1823	0	0.23197	0.530953	0.128859
2000	1020	28.1879	27.3521	0	0.213679	0.503358	0.118729
2000	1015	27.3575	26.5722	0	0.197207	0.478388	0.10973
2000	1010	26.5775	25.8377	0	0.18234	0.455709	0.10171
2000	1005	25.8429	25.1444	0	0.168896	0.435053	0.09454
2000	1000	25.1495	24.4884	0	0.156716	0.416186	0.088111
2000	995	24.4934	23.8665	0	0.145657	0.398909	0.082332
2000	990	23.8714	23.2756	0	0.135599	0.383045	0.077123
2000	985	23.2804	22.7131	0	0.126431	0.368444	0.072415
2000	980	22.7179	22.1767	0	0.118059	0.354973	0.068151
2000	975	22.1814	21.6642	0	0.110399	0.342516	0.06428
2000	970	21.6688	21.1737	0	0.103377	0.330972	0.060758
2000	965	21.1783	20.7035	0	0.096928	0.320253	0.057548
2000	960	20.7081	20.2522	0	0.090993	0.310279	0.054618
2000	955	20.2567	19.8182	0	0.085523	0.300984	0.051939
2000	950	19.8226	19.4004	0	0.08047	0.292305	0.049489
2000	945	19.4048	18.9976	0	0.075794	0.284188	0.047245
2000	940	19.0019	18.6087	0	0.071458	0.276586	0.04519
2000	935	18.613	18.2328	0	0.067431	0.269457	0.043308
2000	930	18.2371	17.8691	0	0.063682	0.262762	0.041585
2000	925	17.8734	17.5167	0	0.060186	0.256467	0.04001
2000	920	17.521	17.1749	0	0.056917	0.250543	0.038574
2000	915	17.1792	16.8431	0	0.053854	0.244963	0.037266
2000	910	16.8473	16.5206	0	0.050977	0.239701	0.03608
2000	905	16.5248	16.2068	0	0.048267	0.234737	0.035008
2000	900	16.2109	15.9011	0	0.045709	0.23005	0.034044
Title:	Allan	et	al.	1989	(see	Ghiorso	1997)
Phase	Volumes:
Pressure	Temperature	mass	V	liquid_0	olivine_0	clinopyroxene_0	feldspar_0	spinel_0
2000	1400	101.19	39.173	39.173	0	0	0	0
2000	1400	101.19	39.173	39.173	0	0	0	0
2000	1395	101.19	39.1546	39.1546	0	0	0	0
2000	1390	101.19	39.1362	39.1362	0	0	0	0
2000	1385	101.19	39.1178	39.1178	0	0	0	0
2000	1380	101.19	39.0994	39.0994	0	0	0	0
2000	1375	101.19	39.0811	39.0811	0	0	0	0
2000	1370	101.19	39.0627	39.0627	0	0	0	0
2000	1365	101.191	39.0443	39.0443	0	0	0	0
2000	1360	101.191	39.026	39.026	0	0	0	0
2000	1355	101.191	39.0076	39.0076	0	0	0	0
2000	1350	101.191	38.9893	38.9893	0	0	0	0
2000	1345	101.191	38.971	38.971	0	0	0	0
2000	1340	101.191	38.9526	38.9526	0	0	0	0
2000	1335	101.191	38.9343	38.9343	0	0	0	0
2000	1330	101.191	38.916	38.916	0	0	0	0
2000	1325	101.192	38.8977	38.8977	0	0	0	0
2000	1320	101.192	38.8794	38.8794	0	0	0	0
2000	1315	101.192	38.8612	38.8612	0	0	0	0
2000	1310	101.192	38.8429	38.8429	0	0	0	0
2000	1305	101.192	38.8246	38.8246	0	0	0	0
2000	1300	101.192	38.8064	38.8064	0	0	0	0
2000	1295	101.192	38.7881	38.7881	0	0	0	0
2000	1290	101.193	38.7699	38.7699	0	0	0	0
2000	1285	101.193	38.7517	38.7517	0	0	0	0
2000	1280	101.193	38.7335	38.7335	0	0	0	0
2000	1275	101.193	38.7153	38.7153	0	0	0	0
2000	1270	101.193	38.6971	38.6971	0	0	0	0
2000	1265	101.194	38.6789	38.6789	0	0	0	0
2000	1260	101.194	38.6607	38.6607	0	0	0	0
2000	1255	101.194	38.6425	38.6425	0	0	0	0
2000	1250	101.194	38.6244	38.6244	0	0	0	0
2000	1245	101.194	38.6063	38.6063	0	0	0	0
2000	1240	101.195	38.5881	38.5881	0	0	0	0
2000	1235	101.195	38.57	38.57	0	0	0	0
2000	1230	101.195	38.5519	38.5519	0	0	0	0
2000	1225	101.195	38.5338	38.5338	0	0	0	0
2000	1220	101.196	38.5157	38.5157	0	0	0	0
2000	1215	101.196	38.4976	38.4976	0	0	0	0
2000	1210	101.196	38.4796	38.4796	0	0	0	0
2000	1205	101.196	38.4552	38.3646	0.090571	0	0	0
2000	1200	100.903	38.3374	38.2008	0.136598	0	0	0
2000	1195	100.461	38.1739	38.0398	0.134067	0	0	0
2000	1190	100.027	38.0132	37.8816	0.131594	0	0	0
2000	1185	99.6016	37.7252	36.8631	0.020173	0.84191	0	0
2000	1180	96.8292	36.6836	35.0239	0.15466	0.780411	0.71727	0.007365
2000	1175	91.859	34.8579	33.1279	0.187772	0.662881	0.875588	0.003795
2000	1170	86.7447	32.9789	31.4316	0.168206	0.589455	0.786036	0.003543
2000	1165	82.1699	31.2972	29.9057	0.151548	0.526926	0.709693	0.00333
2000	1160	78.0548	29.7838	28.526	0.137261	0.473257	0.644095	0.00315
2000	1155	74.3345	28.4149	27.2728	0.124927	0.426867	0.587329	0.002997
2000	1150	70.9556	27.1711	26.1296	0.114216	0.386515	0.537887	0.002868
2000	1145	67.8738	26.0362	25.0828	0.104869	0.351216	0.49457	0.002761
2000	1140	65.0521	24.9966	24.1207	0.096675	0.320178	0.456414	0.002674
2000	1135	62.4593	24.041	23.2335	0.089464	0.292764	0.422637	0.002608
2000	1130	60.0686	23.1595	22.4128	0.0831	0.268457	0.392601	0.002563
2000	1125	57.8572	22.3439	21.6513	0.077468	0.246834	0.365785	0.002544
2000	1120	55.8055	21.587	20.9426	0.072483	0.227552	0.341775	0.002564
2000	1115	53.8961	20.8824	20.281	0.068081	0.210336	0.320291	0.002662
2000	1110	52.1134	20.2244	19.6608	0.064244	0.195026	0.301375	0.003016
2000	1105	50.4414	19.6074	19.0755	0.060765	0.181914	0.284958	0.0042
2000	1100	48.8613	19.0249	18.5198	0.057598	0.170531	0.270865	0.006171
2000	1095	47.357	18.4718	17.9886	0.054916	0.160053	0.259491	0.008756
2000	1090	45.914	17.9429	17.4756	0.052759	0.150153	0.251765	0.01261
2000	1085	44.5137	17.432	16.9586	0.051104	0.141635	0.256389	0.024253
2000	1080	43.0847	16.9161	16.3655	0.049432	0.135951	0.301034	0.064183
2000	1075	41.3821	16.3262	15.7847	0.046226	0.120562	0.303138	0.071602
2000	1070	39.7013	15.7489	15.252	0.042972	0.103805	0.285867	0.064204
2000	1065	38.1654	15.2193	14.7622	0.040255	0.089247	0.270069	0.057482
2000	1060	36.7583	14.7321	14.3098	0.037941	0.076712	0.255953	0.051671
2000	1055	35.4637	14.282	13.8902	0.035938	0.065914	0.243292	0.046638
2000	1050	34.2675	13.8644	13.4995	0.034182	0.056591	0.231895	0.042266
2000	1045	33.1576	13.4755	13.1343	0.032627	0.048518	0.221597	0.038452
2000	1040	32.124	13.1118	12.7917	0.03124	0.041506	0.21226	0.03511
2000	1035	31.158	12.7613	12.3851	0	0.107819	0.234688	0.033728
2000	1030	30.0225	12.3601	12.0435	0	0.07523	0.211046	0.030348
2000	1025	29.0741	12.0198	11.7233	0	0.069087	0.199651	0.027803
2000	1020	28.1879	11.7008	11.4223	0	0.063567	0.189364	0.025553
2000	1015	27.3575	11.401	11.1388	0	0.058599	0.180058	0.023559
2000	1010	26.5775	11.1184	10.8709	0	0.054117	0.171608	0.021785
2000	1005	25.8429	10.8514	10.6172	0	0.050066	0.163914	0.020202
2000	1000	25.1495	10.5985	10.3765	0	0.046397	0.156887	0.018786
2000	995	24.4934	10.3585	10.1475	0	0.043068	0.150455	0.017515
2000	990	23.8714	10.1302	9.92927	0	0.040042	0.14455	0.016372
2000	985	23.2804	9.91263	9.72089	0	0.037285	0.139117	0.01534
2000	980	22.7179	9.70483	9.52154	0	0.034768	0.134106	0.014407
2000	975	22.1814	9.50601	9.3305	0	0.032467	0.129473	0.013561
2000	970	21.6688	9.31545	9.14711	0	0.030359	0.125182	0.012793
2000	965	21.1783	9.13251	8.97079	0	0.028424	0.121198	0.012094
2000	960	20.7081	8.9566	8.801	0	0.026645	0.117492	0.011457
2000	955	20.2567	8.78719	8.63727	0	0.025005	0.11404	0.010876
2000	950	19.8226	8.62382	8.47917	0	0.023492	0.110817	0.010344
2000	945	19.4048	8.46605	8.3263	0	0.022092	0.107804	0.009858
2000	940	19.0019	8.31349	8.1783	0	0.020795	0.104983	0.009413
2000	935	18.613	8.16578	8.03485	0	0.019592	0.102339	0.009007
2000	930	18.2371	8.0226	7.89564	0	0.018473	0.099856	0.008635
2000	925	17.8734	7.88366	7.76041	0	0.017429	0.097523	0.008295
2000	920	17.521	7.74866	7.6289	0	0.016455	0.095328	0.007985
2000	915	17.1792	7.61738	7.50087	0	0.015543	0.093261	0.007703
2000	910	16.8473	7.48958	7.37613	0	0.014687	0.091313	0.007447
2000	905	16.5248	7.36503	7.25446	0	0.013883	0.089476	0.007216
2000	900	16.2109	7.24356	7.13569	0	0.013124	0.087743	0.007009
Title:	Allan	et	al.	1989	(see	Ghiorso	1997)
Solid	Composition:
Pressure	Temperature	mass	SiO2	TiO2	Al2O3	Fe2O3	Cr2O3	FeO	MgO	CaO	Na2O	K2O	P2O5	H2O
2000	1400	0	---
2000	1400	0	---
2000	1395	0	---
2000	1390	0	---
2000	1385	0	---
2000	1380	0	---
2000	1375	0	---
2000	1370	0	---
2000	1365	0	---
2000	1360	0	---
2000	1355	0	---
2000	1350	0	---
2000	1345	0	---
2000	1340	0	---
2000	1335	0	---
2000	1330	0	---
2000	1325	0	---
2000	1320	0	---
2000	1315	0	---
2000	1310	0	---
2000	1305	0	---
2000	1300	0	---
2000	1295	0	---
2000	1290	0	---
2000	1285	0	---
2000	1280	0	---
2000	1275	0	---
2000	1270	0	---
2000	1265	0	---
2000	1260	0	---
2000	1255	0	---
2000	1250	0	---
2000	1245	0	---
2000	1240	0	---
2000	1235	0	---
2000	1230	0	---
2000	1225	0	---
2000	1220	0	---
2000	1215	0	---
2000	1210	0	---
2000	1205	0.293147	40.2305	0	1.50841e-14	0	0	12.9035	46.3982	0.467806	0	0	0	0
2000	1200	0.442546	40.1955	0	3.74696e-15	0	0	13.0876	46.2454	0.471439	0	0	0	0
2000	1195	0.434771	40.16	0	-1.77985e-14	0	0	13.2747	46.0902	0.475077	0	0	0	0
2000	1190	0.427174	40.1239	0	-6.21087e-14	0	0	13.4649	45.9324	0.478721	0	0	0	0
2000	1185	2.77426	50.4336	0.455759	5.57927	1.38588	0	4.31786	16.952	20.7065	0.169124	0	0	0
2000	1180	4.97368	47.8112	0.264296	16.3986	0.794357	0.0893955	3.62354	12.865	17.3814	0.771097	0.00113744	0	0
2000	1175	5.11773	47.4926	0.238705	18.2074	0.65617	0.0441918	3.59644	12.1463	16.711	0.9059	0.00142552	0	0
2000	1170	4.57834	47.4622	0.261077	18.2393	0.672605	0.0454865	3.70582	12.0474	16.6324	0.932172	0.00150746	0	0
2000	1165	4.11869	47.4292	0.28496	18.2741	0.689323	0.0468287	3.81626	11.946	16.5528	0.95892	0.00159096	0	0
2000	1160	3.72393	47.3933	0.310493	18.3115	0.70641	0.0482212	3.92796	11.8421	16.4722	0.986223	0.00167621	0	0
2000	1155	3.38253	47.3543	0.337845	18.3513	0.723972	0.0496689	4.04114	11.7357	16.3902	1.01415	0.00176344	0	0
2000	1150	3.08541	47.3121	0.367227	18.3932	0.74214	0.0511804	4.15604	11.6267	16.3068	1.04278	0.00185284	0	0
2000	1145	2.82537	47.2661	0.398901	18.437	0.761088	0.052769	4.27295	11.5153	16.2218	1.07215	0.00194461	0	0
2000	1140	2.5966	47.2158	0.433208	18.4823	0.781057	0.0544574	4.39221	11.4015	16.1351	1.10233	0.00203894	0	0
2000	1135	2.39446	47.1605	0.470603	18.5286	0.802391	0.0562836	4.51427	11.2852	16.0466	1.13335	0.00213601	0	0
2000	1130	2.21512	47.0991	0.511722	18.5755	0.825625	0.0583155	4.63975	11.1665	15.9561	1.16522	0.00223597	0	0
2000	1125	2.05553	47.0296	0.557512	18.6219	0.85167	0.060684	4.76961	11.0452	15.8635	1.19796	0.00233892	0	0
2000	1120	1.91325	46.949	0.609565	18.6666	0.882333	0.0636756	4.90564	10.921	15.7682	1.23151	0.00244493	0	0
2000	1115	1.78666	46.8499	0.671287	18.7068	0.922255	0.0680567	5.05234	10.7927	15.6684	1.26581	0.00255398	0	0
2000	1110	1.67616	46.7056	0.754231	18.7341	0.98884	0.0764521	5.22677	10.6551	15.5557	1.3005	0.00266567	0	0
2000	1105	1.58433	46.4406	0.887709	18.7382	1.12239	0.0925657	5.46877	10.4989	15.415	1.33307	0.00277461	0	0
2000	1100	1.50883	46.0456	1.08291	18.7307	1.31958	0.103887	5.78739	10.3204	15.2428	1.36383	0.00288189	0	0
2000	1095	1.44791	45.5302	1.3449	18.727	1.56982	0.0982455	6.18809	10.113	15.0303	1.39546	0.00299503	0	0
2000	1090	1.40607	44.808	1.709	18.7338	1.91843	0.0724495	6.73019	9.85634	14.7405	1.42824	0.00311725	0	0
2000	1085	1.43814	43.1377	2.45752	18.7154	2.79992	0.0291046	7.90814	9.39638	14.0991	1.45342	0.00323912	0	0
2000	1080	1.71237	39.1909	4.02541	18.5767	5.10727	0.0015248	10.6471	8.42387	12.5677	1.45612	0.00335043	0	0
2000	1075	1.69009	38.4161	4.26594	18.6707	5.72843	0	11.3619	8.00215	12.0324	1.51869	0.00358995	0	0
2000	1070	1.54478	38.7606	4.06573	18.8661	5.71142	0	11.3414	7.78953	11.8559	1.60558	0.00388748	0	0
2000	1065	1.41545	39.1185	3.86696	19.0735	5.67635	0	11.2949	7.587	11.6819	1.6967	0.00420454	0	0
2000	1060	1.30266	39.4652	3.67916	19.2837	5.64099	0	11.2428	7.38906	11.5035	1.79106	0.00453963	0	0
2000	1055	1.20398	39.8025	3.50127	19.4928	5.60653	0	11.1869	7.19523	11.3215	1.88839	0.00489288	0	0
2000	1050	1.11729	40.132	3.33236	19.6982	5.57353	0	11.1288	7.00513	11.1362	1.9885	0.00526468	0	0
2000	1045	1.0408	40.4551	3.17164	19.8981	5.54218	0	11.0694	6.8185	10.9482	2.09123	0.0056555	0	0
2000	1040	0.973025	40.7729	3.0184	20.0915	5.51251	0	11.0094	6.63514	10.7577	2.19642	0.00606585	0	0
2000	1035	1.14144	44.2448	2.36907	19.1613	4.77786	0	11.129	7.15343	9.05433	2.10432	0.0059832	0	0
2000	1030	0.95413	43.8242	2.48402	20.1983	5.14828	0	10.6848	6.07968	9.26534	2.30865	0.00673326	0	0
2000	1025	0.891782	44.0725	2.38927	20.2672	5.15475	0	10.5769	5.90744	9.23458	2.39018	0.00712815	0	0
2000	1020	0.835766	44.3213	2.29626	20.3353	5.16401	0	10.4674	5.7377	9.19603	2.47449	0.00754478	0	0
2000	1015	0.785325	44.5707	2.20497	20.402	5.17587	0	10.3565	5.57046	9.15003	2.56153	0.00798427	0	0
2000	1010	0.739759	44.8209	2.11543	20.4664	5.19029	0	10.2446	5.40592	9.09687	2.65118	0.00844756	0	0
2000	1005	0.698488	45.072	2.02763	20.528	5.20717	0	10.1319	5.24415	9.0369	2.74333	0.00893569	0	0
2000	1000	0.661013	45.3239	1.94157	20.5863	5.2264	0	10.0188	5.0852	8.97048	2.83789	0.00944977	0	0
2000	995	0.626898	45.5769	1.85724	20.6409	5.24786	0	9.9053	4.9291	8.89796	2.93474	0.00999094	0	0
2000	990	0.595767	45.8308	1.77463	20.6915	5.27146	0	9.79167	4.77588	8.81968	3.03378	0.0105604	0	0
2000	985	0.56729	46.0857	1.69373	20.7378	5.29711	0	9.67804	4.62555	8.73597	3.1349	0.0111594	0	0
2000	980	0.541183	46.3415	1.61453	20.7797	5.32472	0	9.56457	4.47811	8.64712	3.23798	0.0117893	0	0
2000	975	0.517194	46.5981	1.53702	20.8169	5.35425	0	9.45139	4.33356	8.55341	3.34292	0.0124515	0	0
2000	970	0.495107	46.8553	1.4612	20.8495	5.38566	0	9.33864	4.19188	8.45511	3.44959	0.0131473	0	0
2000	965	0.474728	47.113	1.38704	20.8773	5.41895	0	9.22644	4.05305	8.35247	3.55788	0.0138784	0	0
2000	960	0.45589	47.371	1.31454	20.9002	5.45417	0	9.11493	3.91705	8.24571	3.66769	0.0146464	0	0
2000	955	0.438446	47.6291	1.2437	20.9183	5.49137	0	9.00423	3.78383	8.13505	3.7789	0.0154528	0	0
2000	950	0.422263	47.887	1.17451	20.9316	5.53069	0	8.89445	3.65335	8.02069	3.8914	0.0162997	0	0
2000	945	0.407226	48.1443	1.10696	20.9401	5.57229	0	8.78572	3.52556	7.9028	4.00507	0.0171887	0	0
2000	940	0.393234	48.4007	1.04106	20.9438	5.61639	0	8.67816	3.4004	7.78157	4.11981	0.018122	0	0
2000	935	0.380196	48.6558	0.976791	20.9427	5.66327	0	8.57185	3.27781	7.65714	4.23551	0.0191016	0	0
2000	930	0.368029	48.9091	0.914166	20.9369	5.71328	0	8.46691	3.15772	7.52968	4.35206	0.0201297	0	0
2000	925	0.356663	49.1602	0.853185	20.9265	5.76678	0	8.36341	3.04004	7.39931	4.46937	0.0212086	0	0
2000	920	0.346034	49.4085	0.793854	20.9115	5.82424	0	8.26142	2.92471	7.26618	4.58732	0.0223409	0	0
2000	915	0.336082	49.6534	0.736181	20.8919	5.88613	0	8.16099	2.81162	7.13041	4.70581	0.0235292	0	0
2000	910	0.326758	49.8944	0.68018	20.8679	5.95295	0	8.06213	2.70071	6.99213	4.82477	0.0247763	0	0
2000	905	0.318012	50.131	0.625867	20.8396	6.02522	0	7.96482	2.59188	6.85147	4.9441	0.0260851	0	0
2000	900	0.309804	50.3626	0.57327	20.8069	6.10339	0	7.86899	2.48506	6.70855	5.06373	0.027459	0	0
Title:	Allan	et	al.	1989	(see	Ghiorso	1997)
Bulk	Composition:
Pressure	Temperature	mass	SiO2	TiO2	Al2O3	Fe2O3	Cr2O3	FeO	MgO	CaO	Na2O	K2O	P2O5	H2O
2000	1400	101.19	48.1075	0.998123	17.4326	1.27391	0.0296472	7.14588	8.99299	12.3036	2.61884	0.0296472	0.0790592	0.98824
2000	1400	101.19	48.1075	0.998123	17.4326	1.27391	0.0296472	7.14588	8.99299	12.3036	2.61884	0.0296472	0.0790592	0.98824
2000	1395	101.19	48.1075	0.998122	17.4325	1.27466	0.0296472	7.1452	8.99298	12.3036	2.61883	0.0296472	0.0790591	0.988239
2000	1390	101.19	48.1075	0.998121	17.4325	1.27545	0.0296472	7.14448	8.99297	12.3036	2.61883	0.0296472	0.0790591	0.988239
2000	1385	101.19	48.1074	0.99812	17.4325	1.27628	0.0296471	7.14373	8.99296	12.3036	2.61883	0.0296471	0.079059	0.988238
2000	1380	101.19	48.1074	0.998119	17.4325	1.27715	0.0296471	7.14294	8.99296	12.3035	2.61883	0.0296471	0.079059	0.988237
2000	1375	101.19	48.1073	0.998118	17.4325	1.27805	0.0296471	7.14212	8.99295	12.3035	2.61883	0.0296471	0.0790589	0.988236
2000	1370	101.19	48.1073	0.998117	17.4325	1.279	0.0296471	7.14125	8.99294	12.3035	2.61882	0.0296471	0.0790588	0.988235
2000	1365	101.191	48.1072	0.998116	17.4324	1.27999	0.029647	7.14036	8.99293	12.3035	2.61882	0.029647	0.0790587	0.988234
2000	1360	101.191	48.1072	0.998115	17.4324	1.28102	0.029647	7.13942	8.99292	12.3035	2.61882	0.029647	0.0790586	0.988233
2000	1355	101.191	48.1071	0.998114	17.4324	1.28209	0.029647	7.13845	8.99291	12.3035	2.61881	0.029647	0.0790586	0.988232
2000	1350	101.191	48.1071	0.998113	17.4324	1.2832	0.0296469	7.13744	8.9929	12.3035	2.61881	0.0296469	0.0790585	0.988231
2000	1345	101.191	48.107	0.998112	17.4324	1.28436	0.0296469	7.13639	8.99289	12.3035	2.61881	0.0296469	0.0790584	0.98823
2000	1340	101.191	48.107	0.998111	17.4324	1.28556	0.0296469	7.1353	8.99288	12.3034	2.61881	0.0296469	0.0790583	0.988229
2000	1335	101.191	48.1069	0.99811	17.4323	1.28681	0.0296468	7.13417	8.99287	12.3034	2.6188	0.0296468	0.0790582	0.988227
2000	1330	101.191	48.1068	0.998108	17.4323	1.2881	0.0296468	7.133	8.99286	12.3034	2.6188	0.0296468	0.0790581	0.988226
2000	1325	101.192	48.1068	0.998107	17.4323	1.28943	0.0296467	7.13178	8.99285	12.3034	2.6188	0.0296467	0.079058	0.988225
2000	1320	101.192	48.1067	0.998106	17.4323	1.29081	0.0296467	7.13053	8.99283	12.3034	2.61879	0.0296467	0.0790579	0.988223
2000	1315	101.192	48.1066	0.998104	17.4322	1.29224	0.0296467	7.12923	8.99282	12.3034	2.61879	0.0296467	0.0790578	0.988222
2000	1310	101.192	48.1066	0.998103	17.4322	1.29372	0.0296466	7.12789	8.99281	12.3033	2.61878	0.0296466	0.0790576	0.98822
2000	1305	101.192	48.1065	0.998101	17.4322	1.29524	0.0296466	7.12651	8.99279	12.3033	2.61878	0.0296466	0.0790575	0.988219
2000	1300	101.192	48.1064	0.9981	17.4322	1.29681	0.0296465	7.12508	8.99278	12.3033	2.61878	0.0296465	0.0790574	0.988217
2000	1295	101.192	48.1063	0.998098	17.4321	1.29844	0.0296465	7.12361	8.99276	12.3033	2.61877	0.0296465	0.0790573	0.988216
2000	1290	101.193	48.1063	0.998096	17.4321	1.30011	0.0296464	7.12209	8.99275	12.3033	2.61877	0.0296464	0.0790571	0.988214
2000	1285	101.193	48.1062	0.998095	17.4321	1.30183	0.0296464	7.12052	8.99273	12.3032	2.61876	0.0296464	0.079057	0.988212
2000	1280	101.193	48.1061	0.998093	17.432	1.30361	0.0296463	7.11891	8.99272	12.3032	2.61876	0.0296463	0.0790569	0.988211
2000	1275	101.193	48.106	0.998091	17.432	1.30544	0.0296463	7.11725	8.9927	12.3032	2.61875	0.0296463	0.0790567	0.988209
2000	1270	101.193	48.1059	0.998089	17.432	1.30732	0.0296462	7.11554	8.99268	12.3032	2.61875	0.0296462	0.0790566	0.988207
2000	1265	101.194	48.1058	0.998087	17.4319	1.30925	0.0296462	7.11378	8.99267	12.3032	2.61874	0.0296462	0.0790564	0.988205
2000	1260	101.194	48.1057	0.998085	17.4319	1.31125	0.0296461	7.11197	8.99265	12.3031	2.61874	0.0296461	0.0790562	0.988203
2000	1255	101.194	48.1056	0.998083	17.4319	1.31329	0.029646	7.11011	8.99263	12.3031	2.61873	0.029646	0.0790561	0.988201
2000	1250	101.194	48.1055	0.998081	17.4318	1.3154	0.029646	7.1082	8.99261	12.3031	2.61873	0.029646	0.0790559	0.988199
2000	1245	101.194	48.1054	0.998079	17.4318	1.31756	0.0296459	7.10624	8.99259	12.3031	2.61872	0.0296459	0.0790557	0.988197
2000	1240	101.195	48.1053	0.998077	17.4318	1.31978	0.0296458	7.10422	8.99257	12.303	2.61872	0.0296458	0.0790556	0.988195
2000	1235	101.195	48.1052	0.998074	17.4317	1.32206	0.0296458	7.10215	8.99255	12.303	2.61871	0.0296458	0.0790554	0.988192
2000	1230	101.195	48.1051	0.998072	17.4317	1.3244	0.0296457	7.10003	8.99253	12.303	2.6187	0.0296457	0.0790552	0.98819
2000	1225	101.195	48.105	0.99807	17.4316	1.3268	0.0296456	7.09785	8.99251	12.3029	2.6187	0.0296456	0.079055	0.988188
2000	1220	101.196	48.1049	0.998067	17.4316	1.32926	0.0296456	7.09561	8.99249	12.3029	2.61869	0.0296456	0.0790548	0.988185
2000	1215	101.196	48.1047	0.998065	17.4315	1.33179	0.0296455	7.09331	8.99246	12.3029	2.61868	0.0296455	0.0790546	0.988183
2000	1210	101.196	48.1046	0.998062	17.4315	1.33438	0.0296454	7.09096	8.99244	12.3028	2.61868	0.0296454	0.0790544	0.98818
2000	1205	101.196	48.1047	0.998064	17.4315	1.33251	0.0296455	7.09266	8.99246	12.3029	2.61868	0.0296455	0.0790546	0.988182
2000	1200	100.903	48.1277	1.00096	17.4821	1.33211	0.0297314	7.0797	8.88419	12.3372	2.62628	0.0297314	0.0792838	0.991047
2000	1195	100.461	48.1628	1.00536	17.559	1.33373	0.0298622	7.05715	8.72002	12.3894	2.63783	0.0298622	0.0796326	0.995407
2000	1190	100.027	48.1977	1.00973	17.6352	1.33529	0.0299918	7.03401	8.558	12.4411	2.64928	0.0299918	0.0799783	0.999728
2000	1185	99.6016	48.232	1.01404	17.7106	1.34664	0.03012	7.00139	8.39804	12.4922	2.6606	0.03012	0.08032	1.004
2000	1180	96.8292	48.1689	1.03002	18.0579	1.34432	0.0309824	7.07938	8.15343	12.2569	2.73193	0.0309824	0.0826197	1.03275
2000	1175	91.859	48.1879	1.07146	18.1479	1.36812	0.0279874	7.27199	7.8989	11.9793	2.83802	0.0325972	0.08709	1.08863
2000	1170	86.7447	48.2286	1.12056	18.1447	1.40429	0.0272064	7.4942	7.64892	11.7002	2.95192	0.034435	0.0922246	1.15281
2000	1165	82.1699	48.2709	1.16842	18.1396	1.43939	0.0263697	7.71051	7.40448	11.4253	3.06436	0.0362682	0.0973592	1.21699
2000	1160	78.0548	48.3149	1.21501	18.1328	1.47349	0.0254782	7.92107	7.16551	11.1547	3.17534	0.0380964	0.102492	1.28115
2000	1155	74.3345	48.3606	1.26029	18.124	1.50664	0.0245328	8.12602	6.93192	10.8883	3.28488	0.0399191	0.107622	1.34527
2000	1150	70.9556	48.408	1.30423	18.1134	1.5389	0.0235336	8.32545	6.70365	10.626	3.39299	0.0417361	0.112747	1.40933
2000	1145	67.8738	48.4572	1.3468	18.1009	1.57033	0.0224807	8.51948	6.48062	10.3678	3.49968	0.0435469	0.117866	1.47332
2000	1140	65.0521	48.5083	1.38793	18.0866	1.60096	0.021373	8.70817	6.26274	10.1135	3.60495	0.0453514	0.122978	1.53723
2000	1135	62.4593	48.5613	1.42759	18.0703	1.63085	0.0202087	8.89159	6.04992	9.86315	3.70881	0.0471493	0.128083	1.60104
2000	1130	60.0686	48.6164	1.46571	18.0522	1.66003	0.0189844	9.06977	5.84208	9.61667	3.81128	0.0489408	0.133181	1.66476
2000	1125	57.8572	48.6736	1.5022	18.0324	1.68857	0.0176938	9.24272	5.63909	9.37398	3.91239	0.0507258	0.138271	1.72839
2000	1120	55.8055	48.7333	1.53698	18.0108	1.71651	0.0163261	9.41038	5.44085	9.13497	4.01215	0.0525047	0.143355	1.79194
2000	1115	53.8961	48.7956	1.56989	17.9876	1.74397	0.0148599	9.57257	5.24722	8.89953	4.11062	0.0542781	0.148434	1.85542
2000	1110	52.1134	48.8612	1.60071	17.9629	1.77134	0.013247	9.72868	5.05802	8.6675	4.20789	0.0560474	0.153511	1.91889
2000	1105	50.4414	48.9316	1.62889	17.9371	1.79941	0.0113449	9.87692	4.87293	8.43863	4.30421	0.0578168	0.1586	1.9825
2000	1100	48.8613	49.0108	1.65304	17.9108	1.82768	0.00887553	10.0148	4.69139	8.21244	4.40023	0.0595966	0.163729	2.04661
2000	1095	47.357	49.1035	1.67138	17.8841	1.85549	0.00596981	10.1397	4.51292	7.98843	4.49661	0.061398	0.16893	2.11162
2000	1090	45.914	49.2139	1.6819	17.8567	1.88371	0.00313924	10.2477	4.33717	7.76631	4.594	0.0632334	0.174239	2.17799
2000	1085	44.5137	49.3496	1.68129	17.8278	1.92363	0.000990306	10.3224	4.1636	7.54582	4.69347	0.0651242	0.17972	2.2465
2000	1080	43.0847	49.5496	1.65555	17.7956	2.01289	6.06304e-05	10.296	3.98942	7.32632	4.8007	0.0671763	0.185681	2.32101
2000	1075	41.3821	49.9697	1.55763	17.7602	2.0255	0	10.1544	3.80637	7.10857	4.93803	0.0698016	0.19332	2.4165
2000	1070	39.7013	50.4532	1.44252	17.7185	2.00143	0	9.98242	3.6283	6.89819	5.08252	0.072604	0.201505	2.51881
2000	1065	38.1654	50.9184	1.33657	17.6691	1.97769	0	9.81352	3.46052	6.69686	5.22217	0.0753688	0.209614	2.62018
2000	1060	36.7583	51.3648	1.23939	17.6123	1.95526	0	9.64859	3.30235	6.50432	5.35683	0.0780921	0.217638	2.72047
2000	1055	35.4637	51.7941	1.15006	17.5482	1.93407	0	9.48756	3.15305	6.32019	5.48669	0.0807764	0.225583	2.81978
2000	1050	34.2675	52.2077	1.06777	17.4772	1.91402	0	9.33026	3.01191	6.14405	5.61199	0.0834246	0.233458	2.91822
2000	1045	33.1576	52.607	0.991801	17.3998	1.89502	0	9.17647	2.87831	5.97547	5.73294	0.0860399	0.241272	3.0159
2000	1040	32.124	52.9932	0.921541	17.3163	1.87694	0	9.02594	2.75167	5.81406	5.84977	0.0886253	0.249035	3.11293
2000	1035	31.158	53.3672	0.856442	17.2272	1.86128	0	8.87696	2.63147	5.65943	5.96266	0.0911839	0.256756	3.20944
2000	1030	30.0225	53.707	0.799331	17.1516	1.84761	0	8.7047	2.45989	5.52987	6.10831	0.0944056	0.266467	3.33083
2000	1025	29.0741	54.0242	0.74446	17.0497	1.83342	0	8.55602	2.34148	5.40683	6.23194	0.0972646	0.275159	3.43949
2000	1020	28.1879	54.3321	0.692856	16.946	1.81972	0	8.41103	2.22909	5.28531	6.3524	0.100097	0.28381	3.54763
2000	1015	27.3575	54.6309	0.644319	16.8406	1.80645	0	8.26953	2.12236	5.16546	6.46977	0.102906	0.292424	3.6553
2000	1010	26.5775	54.9212	0.598663	16.7335	1.7936	0	8.1313	2.02096	5.04736	6.58412	0.10569	0.301007	3.76259
2000	1005	25.8429	55.2033	0.555714	16.6249	1.78113	0	7.99615	1.92458	4.93112	6.69556	0.108453	0.309563	3.86954
2000	1000	25.1495	55.4777	0.515311	16.5147	1.769	0	7.86389	1.83293	4.81678	6.80415	0.111196	0.318098	3.97623
2000	995	24.4934	55.7447	0.477304	16.4031	1.75718	0	7.73432	1.74573	4.70441	6.91	0.11392	0.326618	4.08273
2000	990	23.8714	56.0047	0.441554	16.2901	1.74565	0	7.60726	1.66274	4.59402	7.01318	0.116627	0.335129	4.18911
2000	985	23.2804	56.2579	0.407932	16.1757	1.73437	0	7.48253	1.58369	4.48565	7.11377	0.119318	0.343636	4.29545
2000	980	22.7179	56.5048	0.376318	16.0601	1.7233	0	7.35997	1.50838	4.37929	7.21186	0.121994	0.352145	4.40182
2000	975	22.1814	56.7456	0.346602	15.9433	1.71244	0	7.23941	1.4366	4.27496	7.30752	0.124658	0.360663	4.50828
2000	970	21.6688	56.9805	0.318681	15.8254	1.70173	0	7.12069	1.36814	4.17266	7.40082	0.127311	0.369194	4.61493
2000	965	21.1783	57.2098	0.292461	15.7063	1.69117	0	7.00366	1.30284	4.07237	7.49184	0.129953	0.377746	4.72182
2000	960	20.7081	57.4339	0.267853	15.5861	1.68073	0	6.88818	1.24052	3.97409	7.58065	0.132587	0.386323	4.82904
2000	955	20.2567	57.6529	0.244776	15.4649	1.67037	0	6.7741	1.18104	3.87781	7.66731	0.135213	0.394932	4.93665
2000	950	19.8226	57.867	0.223153	15.3427	1.66008	0	6.66127	1.12423	3.78351	7.75188	0.137833	0.403579	5.04474
2000	945	19.4048	58.0765	0.202913	15.2195	1.64983	0	6.54956	1.06998	3.69119	7.83442	0.140447	0.41227	5.15337
2000	940	19.0019	58.2816	0.183992	15.0954	1.63959	0	6.43882	1.01816	3.60081	7.915	0.143058	0.42101	5.26263
2000	935	18.613	58.4825	0.166326	14.9702	1.62935	0	6.3289	0.96864	3.51238	7.99365	0.145665	0.429807	5.37258
2000	930	18.2371	58.6793	0.149859	14.8442	1.61907	0	6.21966	0.921328	3.42587	8.07044	0.148271	0.438666	5.48332
2000	925	17.8734	58.8724	0.134537	14.7172	1.60872	0	6.11096	0.876121	3.34128	8.14542	0.150875	0.447593	5.59491
2000	920	17.521	59.0619	0.120307	14.5892	1.59828	0	6.00262	0.832926	3.25858	8.21863	0.15348	0.456596	5.70744
2000	915	17.1792	59.248	0.107124	14.4604	1.58771	0	5.8945	0.791658	3.17777	8.29012	0.156085	0.46568	5.821
2000	910	16.8473	59.4309	0.0949412	14.3305	1.57698	0	5.78642	0.75224	3.09884	8.35993	0.158693	0.474853	5.93566
2000	905	16.5248	59.6109	0.0837165	14.1997	1.56606	0	5.67821	0.714599	3.02178	8.42811	0.161302	0.484122	6.05152
2000	900	16.2109	59.788	0.0734094	14.0679	1.55489	0	5.56969	0.67867	2.94658	8.49469	0.163915	0.493494	6.16867
