# Supplementary material for: A 5-km-thick reservoir with > 380,000 km3 of magma within the ancient Earth's crust
Source: Sci Rep. 2022 Sep 19;12:15651. doi: 10.1038/s41598-022-19915-w (PMC9485162; doi:10.1038/s41598-022-19915-w)
Supplement: Supplementary file 11 — Supplementary Information 11. [file 41598_2022_19915_MOESM11_ESM.xlsx]

## Sheet: alphaMELTS_tbl
SupplTable S2C: R-magma mixed with MORB (wet) - fractional crystallization at 2 kbar
Mixing ratio: MORB30R70
System	Thermodynamic	Data:
Pressure	Temperature	mass	F	phi	S	H	V	dVdP*10^6	dVdT*10^6	Cp	logfO2(absolute)	logfO2-QFM	rhol	rhos	viscosity	aH2O	chisqr
2000	1400	100.006	1	1	298.08	-1.20501e+06	40.0185	-388.796	3670.47	150.23	-6.318	0	2.49899	0	1.729	0.128052	0
2000	1400	100.006	1	1	298.08	-1.20501e+06	40.0185	-388.796	3670.47	150.23	-6.318	0	2.49899	0	1.729	0.128052	0
2000	1395	100.006	1	1	297.631	-1.20576e+06	40.0002	-388.306	3669.61	150.228	-6.362	0	2.50013	0	1.747	0.127917	0
2000	1390	100.006	1	1	297.18	-1.20651e+06	39.9819	-387.815	3668.73	150.226	-6.406	0	2.50128	0	1.765	0.127783	0
2000	1385	100.006	1	1	296.728	-1.20726e+06	39.9637	-387.326	3667.83	150.223	-6.45	0	2.50242	0	1.783	0.127649	0
2000	1380	100.006	1	1	296.274	-1.20802e+06	39.9454	-386.837	3666.91	150.221	-6.495	0	2.50357	0	1.802	0.127515	0
2000	1375	100.006	1	1	295.82	-1.20877e+06	39.9272	-386.348	3665.98	150.219	-6.54	0	2.50471	0	1.82	0.127381	0
2000	1370	100.006	1	1	295.364	-1.20952e+06	39.9089	-385.86	3665.03	150.217	-6.585	0	2.50586	0	1.839	0.127247	0
2000	1365	100.006	1	1	294.906	-1.21027e+06	39.8907	-385.373	3664.06	150.214	-6.63	0	2.50701	0	1.858	0.127114	0
2000	1360	100.006	1	1	294.447	-1.21103e+06	39.8725	-384.886	3663.07	150.212	-6.676	0	2.50816	0	1.876	0.126981	0
2000	1355	100.006	1	1	293.987	-1.21178e+06	39.8542	-384.4	3662.07	150.21	-6.722	0	2.50931	0	1.895	0.126848	0
2000	1350	100.007	1	1	293.525	-1.21253e+06	39.836	-383.915	3661.05	150.208	-6.768	0	2.51046	0	1.914	0.126715	0
2000	1345	100.007	1	1	293.062	-1.21328e+06	39.8178	-383.43	3660.01	150.206	-6.815	0	2.51161	0	1.934	0.126582	0
2000	1340	100.007	1	1	292.597	-1.21404e+06	39.7996	-382.946	3658.95	150.204	-6.862	0	2.51276	0	1.953	0.12645	0
2000	1335	100.007	1	1	292.131	-1.21479e+06	39.7815	-382.462	3657.87	150.202	-6.909	0	2.51391	0	1.972	0.126318	0
2000	1330	100.007	1	1	291.664	-1.21554e+06	39.7633	-381.979	3656.78	150.2	-6.956	0	2.51506	0	1.992	0.126187	0
2000	1325	100.007	1	1	291.195	-1.2163e+06	39.7451	-381.497	3655.67	150.198	-7.004	0	2.51621	0	2.012	0.126055	0
2000	1320	100.007	1	1	290.725	-1.21705e+06	39.727	-381.015	3654.54	150.196	-7.052	0	2.51737	0	2.031	0.125924	0
2000	1315	100.008	1	1	290.253	-1.2178e+06	39.7088	-380.534	3653.4	150.194	-7.1	0	2.51852	0	2.051	0.125794	0
2000	1310	100.008	1	1	289.78	-1.21855e+06	39.6907	-380.053	3652.23	150.192	-7.149	0	2.51967	0	2.071	0.125664	0
2000	1305	100.008	1	1	289.305	-1.21931e+06	39.6726	-379.574	3651.05	150.19	-7.198	0	2.52083	0	2.091	0.125534	0
2000	1300	100.008	1	1	288.829	-1.22006e+06	39.6545	-379.094	3649.85	150.188	-7.247	0	2.52198	0	2.112	0.125404	0
2000	1295	100.008	1	1	288.351	-1.22081e+06	39.6364	-378.616	3648.64	150.187	-7.296	0	2.52314	0	2.132	0.125275	0
2000	1290	100.008	1	1	287.872	-1.22157e+06	39.6183	-378.138	3647.4	150.185	-7.346	0	2.5243	0	2.153	0.125147	0
2000	1285	100.008	1	1	287.391	-1.22232e+06	39.6002	-377.661	3646.15	150.183	-7.396	0	2.52546	0	2.173	0.125018	0
2000	1280	100.009	1	1	286.909	-1.22307e+06	39.5821	-377.184	3644.88	150.181	-7.447	0	2.52661	0	2.194	0.124891	0
2000	1275	100.009	1	1	286.425	-1.22383e+06	39.5641	-376.708	3643.6	150.18	-7.498	0	2.52777	0	2.215	0.124763	0
2000	1270	100.009	1	1	285.939	-1.22458e+06	39.546	-376.233	3642.29	150.178	-7.549	0	2.52893	0	2.236	0.124637	0
2000	1265	100.009	1	1	285.452	-1.22534e+06	39.528	-375.758	3640.97	150.176	-7.6	0	2.53009	0	2.257	0.124511	0
2000	1260	100.009	1	1	284.964	-1.22609e+06	39.5099	-375.284	3639.63	150.175	-7.652	0	2.53125	0	2.279	0.124385	0
2000	1255	100.01	1	1	284.474	-1.22684e+06	39.4919	-374.811	3638.28	150.173	-7.704	0	2.53241	0	2.3	0.12426	0
2000	1250	100.01	1	1	283.982	-1.2276e+06	39.4739	-374.338	3636.9	150.172	-7.757	0	2.53357	0	2.322	0.124136	0
2000	1245	100.01	1	1	283.489	-1.22835e+06	39.4559	-373.866	3635.51	150.17	-7.81	0	2.53473	0	2.344	0.124012	0
2000	1240	100.01	1	1	282.994	-1.22911e+06	39.4379	-373.395	3634.1	150.169	-7.863	0	2.53589	0	2.366	0.123889	0
2000	1235	100.011	1	1	282.497	-1.22986e+06	39.42	-372.925	3632.68	150.167	-7.917	0	2.53705	0	2.388	0.123766	0
2000	1230	100.011	1	1	281.999	-1.23061e+06	39.402	-372.455	3631.24	150.166	-7.97	0	2.53821	0	2.41	0.123644	0
2000	1225	100.011	1	1	281.499	-1.23137e+06	39.3841	-371.986	3629.78	150.165	-8.025	0	2.53938	0	2.432	0.123523	0
2000	1220	100.011	1	1	280.997	-1.23212e+06	39.3661	-371.518	3628.3	150.163	-8.079	0	2.54054	0	2.455	0.123403	0
2000	1215	100.012	1	1	280.494	-1.23288e+06	39.3482	-371.05	3626.81	150.162	-8.134	0	2.5417	0	2.477	0.123283	0
2000	1210	100.012	1	1	279.989	-1.23363e+06	39.3303	-370.583	3625.3	150.161	-8.19	0	2.54287	0	2.5	0.123164	0
2000	1205	100.012	1	1	279.488	-1.23438e+06	39.3124	-370.117	3623.77	145.91	-8.245	0	2.54403	0	2.523	0.123046	0
2000	1200	100.012	1	1	278.994	-1.23511e+06	39.2945	-369.652	3622.22	145.904	-8.302	0	2.5452	0	2.546	0.122929	0
2000	1195	100.013	1	1	278.499	-1.23585e+06	39.2767	-369.187	3620.66	145.897	-8.358	0	2.54636	0	2.57	0.122813	0
2000	1190	100.013	1	1	278.001	-1.23658e+06	39.2588	-368.723	3619.08	145.891	-8.415	0	2.54753	0	2.593	0.122697	0
2000	1185	100.013	1	1	277.503	-1.23731e+06	39.241	-368.26	3617.49	145.884	-8.472	0	2.54869	0	2.617	0.122583	0
2000	1180	100.013	1	1	277.002	-1.23805e+06	39.2231	-367.798	3615.87	145.877	-8.53	0	2.54986	0	2.64	0.122469	0
2000	1175	100.014	1	1	276.5	-1.23878e+06	39.2053	-367.336	3614.24	145.871	-8.588	0	2.55103	0	2.664	0.122357	0
2000	1170	100.014	1	1	275.996	-1.23952e+06	39.1875	-366.875	3612.6	145.863	-8.646	0	2.55219	0	2.688	0.122245	0
2000	1165	100.014	1	1	275.49	-1.24025e+06	39.1697	-366.415	3610.93	145.856	-8.705	0	2.55336	0	2.713	0.122135	0
2000	1160	100.014	0.979212	0.983498	274.388	-1.24183e+06	39.0478	-363.613	3584.92	145.092	-8.765	0	2.55016	3.22655	2.758	0.124947	0
2000	1155	97.9361	0.976214	0.980486	268.403	-1.21681e+06	38.284	-359.695	3527.96	141.805	-8.824	0	2.547	3.11823	2.799	0.12865	0
2000	1150	95.6075	0.959297	0.964194	261.484	-1.18869e+06	37.4112	-352.705	3447.13	137.815	-8.885	0	2.54261	2.90514	2.83	0.136685	0
2000	1145	91.7178	0.960268	0.965007	250.859	-1.13909e+06	35.9582	-345.182	3355.38	131.972	-8.945	0	2.53815	2.89612	2.861	0.144947	0
2000	1140	88.0755	0.961867	0.966446	240.916	-1.09265e+06	34.5954	-338.126	3270.31	126.521	-9.006	0	2.53381	2.89332	2.891	0.153281	0
2000	1135	84.7189	0.963317	0.96775	231.744	-1.04989e+06	33.3377	-331.518	3191.71	121.501	-9.067	0	2.52959	2.89053	2.92	0.161687	0
2000	1130	81.6134	0.961196	0.965875	223.207	-1.01043e+06	32.1561	-324.588	3117.39	116.836	-9.129	0	2.52574	2.88607	2.94	0.171088	0
2000	1125	78.4487	0.962703	0.967221	214.594	-969913	30.9604	-317.984	3045.65	112.144	-9.192	0	2.52201	2.88307	2.959	0.180549	0
2000	1120	75.5249	0.962163	0.966841	206.612	-932526	29.8512	-311.531	2977.06	107.779	-9.254	0	2.5178	2.88696	2.977	0.190546	0
2000	1115	72.6695	0.964342	0.968806	198.863	-896212	28.7748	-305.542	2912.87	103.578	-9.318	0	2.51382	2.8869	2.995	0.200367	0
2000	1110	70.0805	0.9656	0.969929	191.816	-863325	27.7965	-299.932	2853.71	99.7604	-9.381	0	2.50995	2.88419	3.013	0.210229	0
2000	1105	67.672	0.966764	0.970967	185.255	-832750	26.8852	-294.634	2798.51	96.2118	-9.445	0	2.50618	2.88143	3.029	0.220125	0
2000	1100	65.4252	0.967845	0.971928	179.129	-804247	26.0339	-289.616	2746.87	92.9043	-9.51	0	2.50252	2.87863	3.045	0.230053	0
2000	1095	63.3238	0.968848	0.972819	173.395	-777605	25.2366	-284.851	2698.41	89.8138	-9.575	0	2.49896	2.87581	3.06	0.240009	0
2000	1090	61.3536	0.969782	0.973648	168.014	-752641	24.4881	-280.316	2652.84	86.9189	-9.64	0	2.4955	2.87296	3.074	0.249989	0
2000	1085	59.5022	0.970517	0.974333	162.952	-729200	23.7835	-275.982	2609.64	84.1977	-9.706	0	2.49202	2.87381	3.088	0.26003	0
2000	1080	57.7515	0.971248	0.975001	158.165	-707074	23.1172	-271.834	2568.65	81.6287	-9.773	0	2.48859	2.87324	3.102	0.270109	0
2000	1075	56.0947	0.971974	0.97565	153.633	-686167	22.4863	-267.857	2529.75	79.2014	-9.84	0	2.48522	2.87118	3.115	0.280217	0
2000	1070	54.5264	0.972635	0.976243	149.34	-666395	21.8884	-264.038	2492.76	76.906	-9.907	0	2.4819	2.86947	3.127	0.290354	0
2000	1065	53.0381	0.973228	0.97678	145.264	-647655	21.3204	-260.36	2457.47	74.7299	-9.975	0	2.47862	2.86826	3.139	0.300527	0
2000	1060	51.6221	0.973747	0.977258	141.384	-629850	20.7797	-256.812	2423.68	72.6616	-10.044	0	2.47533	2.86771	3.15	0.310742	0
2000	1055	50.2709	0.974184	0.977669	137.68	-612890	20.2634	-253.38	2391.21	70.6899	-10.113	0	2.47203	2.86805	3.162	0.321009	0
2000	1050	48.9773	0.97452	0.978002	134.133	-596690	19.7691	-250.05	2359.83	68.804	-10.183	0	2.46864	2.86964	3.173	0.331346	0
2000	1045	47.7338	0.974686	0.978208	130.722	-581165	19.2942	-246.807	2329.26	66.9922	-10.253	0	2.46508	2.87387	3.184	0.341788	0
2000	1040	46.5304	0.974119	0.97789	127.414	-566221	18.8353	-243.604	2298.5	65.2322	-10.323	0	2.46086	2.89173	3.197	0.35253	0
2000	1035	45.3338	0.970251	0.975251	124.093	-551592	18.3816	-240.263	2263.2	63.4415	-10.394	0	2.45362	2.96459	3.219	0.364504	0
2000	1030	43.9937	0.969109	0.974577	120.47	-535815	17.8912	-236.895	2225.78	61.5035	-10.466	0	2.44516	2.98791	3.246	0.377001	0
2000	1025	42.643	0.969979	0.975322	116.862	-520117	17.4028	-233.641	2189.82	59.5872	-10.538	0	2.43693	2.98084	3.27	0.389449	0
2000	1020	41.371	0.970839	0.976049	113.461	-505321	16.9416	-230.52	2156.13	57.7903	-10.611	0	2.42895	2.97316	3.293	0.40183	0
2000	1015	40.1726	0.97163	0.976718	110.254	-491366	16.5055	-227.52	2124.18	56.0928	-10.684	0	2.4212	2.96582	3.314	0.414148	0
2000	1010	39.0407	0.972362	0.977338	107.221	-478171	16.0924	-224.63	2093.95	54.4907	-10.758	0	2.41367	2.95881	3.334	0.426401	0
2000	1005	37.9693	0.973039	0.977914	104.347	-465668	15.7002	-221.843	2065.29	52.9751	-10.833	0	2.40634	2.95214	3.353	0.438591	0
2000	1000	36.9531	0.973669	0.97845	101.619	-453798	15.3271	-219.149	2038.04	51.5386	-10.908	0	2.39919	2.94577	3.37	0.450716	0
2000	995	35.9871	0.974296	0.978988	99.0228	-442504	14.9713	-216.546	2012.09	50.1741	-10.984	0	2.39222	2.94055	3.385	0.462758	0
2000	990	35.0684	0.974895	0.979504	96.5518	-431754	14.6321	-214.029	1987.34	48.877	-11.06	0	2.3854	2.93561	3.4	0.474711	0
2000	985	34.1942	0.975432	0.979967	94.1981	-421520	14.3084	-211.59	1963.7	47.6434	-11.137	0	2.37873	2.93087	3.414	0.486581	0
2000	980	33.3602	0.975932	0.9804	91.9508	-411751	13.9989	-209.224	1941.07	46.4672	-11.214	0	2.3722	2.92627	3.426	0.498371	0
2000	975	32.5633	0.976399	0.980804	89.8018	-402412	13.7023	-206.925	1919.36	45.344	-11.293	0	2.3658	2.92184	3.437	0.510081	0
2000	970	31.8007	0.976835	0.981182	87.7437	-393470	13.4179	-204.689	1898.5	44.2699	-11.371	0	2.35952	2.91759	3.448	0.521712	0
2000	965	31.0699	0.977242	0.981537	85.7702	-384897	13.1446	-202.511	1878.43	43.2411	-11.451	0	2.35336	2.91352	3.457	0.533265	0
2000	960	30.3686	0.977623	0.981869	83.8751	-376667	12.8818	-200.388	1859.09	42.2545	-11.531	0	2.34729	2.90965	3.466	0.54474	0
2000	955	29.6947	0.977911	0.982127	82.0518	-368757	12.6291	-198.319	1840.28	41.3055	-11.611	0	2.3412	2.90598	3.474	0.556246	0
2000	950	29.0446	0.977514	0.981878	80.2854	-361150	12.3861	-196.291	1821.46	40.3829	-11.693	0	2.33452	2.90961	3.485	0.568319	0
2000	945	28.3963	0.977849	0.98218	78.537	-353650	12.1444	-194.295	1803.07	39.4732	-11.775	0	2.32791	2.90651	3.495	0.580339	0
2000	940	27.7719	0.978137	0.982447	76.8526	-346423	11.911	-192.341	1785.28	38.5976	-11.857	0	2.32138	2.90409	3.504	0.592304	0
2000	935	27.1693	0.978416	0.982705	75.2266	-339447	11.6854	-190.428	1768.04	37.7533	-11.941	0	2.31492	2.90167	3.512	0.604211	0
2000	930	26.5874	0.978685	0.982954	73.6563	-332707	11.467	-188.553	1751.31	36.9386	-12.025	0	2.30853	2.89925	3.519	0.616052	0
2000	925	26.0251	0.978946	0.983195	72.1387	-326192	11.2555	-186.715	1735.08	36.1521	-12.11	0	2.30221	2.89681	3.525	0.627823	0
2000	920	25.4815	0.979199	0.983428	70.6715	-319891	11.0507	-184.912	1719.31	35.3923	-12.195	0	2.29596	2.89434	3.53	0.639517	0
2000	915	24.9557	0.979447	0.983656	69.2522	-313795	10.8521	-183.142	1703.98	34.658	-12.281	0	2.28978	2.89184	3.534	0.651127	0
2000	910	24.447	0.979688	0.983877	67.8788	-307892	10.6596	-181.404	1689.07	33.9481	-12.368	0	2.28366	2.8893	3.537	0.662647	0
2000	905	23.9546	0.979926	0.984094	66.5492	-302176	10.4728	-179.697	1674.55	33.2614	-12.456	0	2.27762	2.88671	3.539	0.674069	0
2000	900	23.4778	0.980159	0.984306	65.2615	-296638	10.2916	-178.02	1660.42	32.5969	-12.544	0	2.27165	2.88407	3.54	0.685386	0
Title:	R-magma	-	residual	from	MZ-magma	at	T	=	1145	C
Liquid	Composition:
Pressure	Temperature	mass	SiO2	TiO2	Al2O3	Fe2O3	Cr2O3	FeO	MnO	MgO	CaO	Na2O	K2O	P2O5	H2O
2000	1400	100.006	53.5261	0.414357	16.7678	1.28032	0.00959721	7.15244	0.169759	5.973	8.98194	4.46299	0.0925775	0.023726	1.14538
2000	1400	100.006	53.5261	0.414357	16.7678	1.28032	0.00959721	7.15244	0.169759	5.973	8.98194	4.46299	0.0925775	0.023726	1.14538
2000	1395	100.006	53.526	0.414357	16.7678	1.28108	0.00959721	7.15176	0.169759	5.97299	8.98193	4.46299	0.0925774	0.023726	1.14537
2000	1390	100.006	53.526	0.414357	16.7678	1.28187	0.0095972	7.15104	0.169759	5.97299	8.98193	4.46298	0.0925774	0.023726	1.14537
2000	1385	100.006	53.5259	0.414356	16.7678	1.2827	0.00959719	7.15028	0.169759	5.97298	8.98192	4.46298	0.0925773	0.023726	1.14537
2000	1380	100.006	53.5259	0.414356	16.7678	1.28357	0.00959718	7.14949	0.169759	5.97298	8.98191	4.46298	0.0925772	0.0237259	1.14537
2000	1375	100.006	53.5258	0.414356	16.7678	1.28449	0.00959717	7.14866	0.169759	5.97297	8.9819	4.46297	0.0925771	0.0237259	1.14537
2000	1370	100.006	53.5258	0.414355	16.7678	1.28544	0.00959717	7.1478	0.169758	5.97297	8.98189	4.46297	0.092577	0.0237259	1.14537
2000	1365	100.006	53.5257	0.414355	16.7677	1.28643	0.00959716	7.1469	0.169758	5.97296	8.98188	4.46296	0.0925769	0.0237259	1.14537
2000	1360	100.006	53.5257	0.414355	16.7677	1.28746	0.00959715	7.14596	0.169758	5.97295	8.98188	4.46296	0.0925768	0.0237258	1.14537
2000	1355	100.006	53.5256	0.414354	16.7677	1.28854	0.00959714	7.14498	0.169758	5.97295	8.98187	4.46295	0.0925767	0.0237258	1.14537
2000	1350	100.007	53.5256	0.414354	16.7677	1.28966	0.00959712	7.14397	0.169758	5.97294	8.98186	4.46295	0.0925766	0.0237258	1.14536
2000	1345	100.007	53.5255	0.414353	16.7677	1.29082	0.00959711	7.14291	0.169757	5.97293	8.98185	4.46294	0.0925765	0.0237258	1.14536
2000	1340	100.007	53.5254	0.414353	16.7676	1.29203	0.0095971	7.14182	0.169757	5.97293	8.98183	4.46294	0.0925764	0.0237257	1.14536
2000	1335	100.007	53.5254	0.414352	16.7676	1.29328	0.00959709	7.14068	0.169757	5.97292	8.98182	4.46293	0.0925763	0.0237257	1.14536
2000	1330	100.007	53.5253	0.414352	16.7676	1.29457	0.00959708	7.1395	0.169757	5.97291	8.98181	4.46293	0.0925762	0.0237257	1.14536
2000	1325	100.007	53.5252	0.414351	16.7676	1.29591	0.00959706	7.13829	0.169757	5.9729	8.9818	4.46292	0.0925761	0.0237256	1.14536
2000	1320	100.007	53.5252	0.41435	16.7676	1.2973	0.00959705	7.13703	0.169756	5.97289	8.98179	4.46291	0.0925759	0.0237256	1.14536
2000	1315	100.008	53.5251	0.41435	16.7675	1.29874	0.00959704	7.13572	0.169756	5.97289	8.98177	4.46291	0.0925758	0.0237256	1.14535
2000	1310	100.008	53.525	0.414349	16.7675	1.30022	0.00959702	7.13438	0.169756	5.97288	8.98176	4.4629	0.0925757	0.0237255	1.14535
2000	1305	100.008	53.5249	0.414349	16.7675	1.30175	0.00959701	7.13299	0.169756	5.97287	8.98175	4.46289	0.0925755	0.0237255	1.14535
2000	1300	100.008	53.5248	0.414348	16.7675	1.30333	0.00959699	7.13155	0.169755	5.97286	8.98173	4.46289	0.0925754	0.0237255	1.14535
2000	1295	100.008	53.5247	0.414347	16.7674	1.30496	0.00959698	7.13007	0.169755	5.97285	8.98172	4.46288	0.0925752	0.0237254	1.14535
2000	1290	100.008	53.5247	0.414347	16.7674	1.30664	0.00959696	7.12855	0.169755	5.97284	8.9817	4.46287	0.0925751	0.0237254	1.14534
2000	1285	100.008	53.5246	0.414346	16.7674	1.30837	0.00959694	7.12697	0.169754	5.97283	8.98169	4.46287	0.0925749	0.0237253	1.14534
2000	1280	100.009	53.5245	0.414345	16.7673	1.31015	0.00959693	7.12535	0.169754	5.97282	8.98167	4.46286	0.0925747	0.0237253	1.14534
2000	1275	100.009	53.5244	0.414344	16.7673	1.31199	0.00959691	7.12369	0.169754	5.97281	8.98165	4.46285	0.0925746	0.0237253	1.14534
2000	1270	100.009	53.5243	0.414344	16.7673	1.31388	0.00959689	7.12197	0.169754	5.9728	8.98164	4.46284	0.0925744	0.0237252	1.14534
2000	1265	100.009	53.5242	0.414343	16.7672	1.31582	0.00959687	7.1202	0.169753	5.97278	8.98162	4.46283	0.0925742	0.0237252	1.14533
2000	1260	100.009	53.5241	0.414342	16.7672	1.31782	0.00959685	7.11839	0.169753	5.97277	8.9816	4.46282	0.092574	0.0237251	1.14533
2000	1255	100.01	53.5239	0.414341	16.7672	1.31988	0.00959683	7.11652	0.169753	5.97276	8.98158	4.46281	0.0925738	0.0237251	1.14533
2000	1250	100.01	53.5238	0.41434	16.7671	1.32199	0.00959681	7.1146	0.169752	5.97275	8.98156	4.4628	0.0925736	0.023725	1.14533
2000	1245	100.01	53.5237	0.414339	16.7671	1.32416	0.00959679	7.11263	0.169752	5.97273	8.98154	4.46279	0.0925734	0.023725	1.14532
2000	1240	100.01	53.5236	0.414338	16.7671	1.32639	0.00959677	7.11061	0.169751	5.97272	8.98152	4.46278	0.0925732	0.0237249	1.14532
2000	1235	100.011	53.5235	0.414337	16.767	1.32868	0.00959675	7.10853	0.169751	5.97271	8.9815	4.46277	0.092573	0.0237249	1.14532
2000	1230	100.011	53.5233	0.414336	16.767	1.33104	0.00959673	7.10639	0.169751	5.97269	8.98148	4.46276	0.0925728	0.0237248	1.14532
2000	1225	100.011	53.5232	0.414335	16.7669	1.33345	0.0095967	7.1042	0.16975	5.97268	8.98146	4.46275	0.0925726	0.0237247	1.14531
2000	1220	100.011	53.5231	0.414334	16.7669	1.33592	0.00959668	7.10195	0.16975	5.97266	8.98144	4.46274	0.0925723	0.0237247	1.14531
2000	1215	100.012	53.5229	0.414333	16.7669	1.33846	0.00959665	7.09965	0.169749	5.97265	8.98142	4.46273	0.0925721	0.0237246	1.14531
2000	1210	100.012	53.5228	0.414332	16.7668	1.34106	0.00959663	7.09728	0.169749	5.97263	8.98139	4.46272	0.0925719	0.0237246	1.14531
2000	1205	100.012	53.5227	0.414331	16.7668	1.34373	0.0095966	7.09486	0.169748	5.97262	8.98137	4.46271	0.0925716	0.0237245	1.1453
2000	1200	100.012	53.5225	0.41433	16.7667	1.34647	0.00959658	7.09237	0.169748	5.9726	8.98134	4.46269	0.0925714	0.0237244	1.1453
2000	1195	100.013	53.5224	0.414329	16.7667	1.34927	0.00959655	7.08983	0.169748	5.97258	8.98132	4.46268	0.0925711	0.0237244	1.1453
2000	1190	100.013	53.5222	0.414328	16.7666	1.35215	0.00959652	7.08722	0.169747	5.97257	8.98129	4.46267	0.0925708	0.0237243	1.14529
2000	1185	100.013	53.5221	0.414326	16.7666	1.35509	0.00959649	7.08454	0.169747	5.97255	8.98127	4.46266	0.0925706	0.0237242	1.14529
2000	1180	100.013	53.5219	0.414325	16.7665	1.35811	0.00959647	7.08181	0.169746	5.97253	8.98124	4.46264	0.0925703	0.0237242	1.14529
2000	1175	100.014	53.5217	0.414324	16.7665	1.3612	0.00959644	7.079	0.169745	5.97251	8.98121	4.46263	0.09257	0.0237241	1.14528
2000	1170	100.014	53.5216	0.414323	16.7664	1.36436	0.00959641	7.07613	0.169745	5.97249	8.98118	4.46261	0.0925697	0.023724	1.14528
2000	1165	100.014	53.5214	0.414321	16.7664	1.36759	0.00959637	7.07319	0.169744	5.97247	8.98115	4.4626	0.0925694	0.0237239	1.14527
2000	1160	97.9352	53.5586	0.419303	17.0297	1.36842	0.00980011	7.09608	0.173348	5.72995	8.77347	4.55296	0.0945347	0.0242276	1.16959
2000	1155	95.6065	53.6117	0.425637	17.2222	1.37415	0.0100388	7.14433	0.17757	5.51957	8.54854	4.6466	0.0967905	0.0248177	1.19808
2000	1150	91.7159	53.7745	0.440498	17.1531	1.40049	0.0104647	7.28768	0.183659	5.32355	8.28454	4.76613	0.100622	0.0258705	1.2489
2000	1145	88.0736	53.9473	0.45578	17.0673	1.42699	0.0108974	7.42519	0.189437	5.12099	8.04114	4.88297	0.104489	0.0269404	1.30055
2000	1140	84.717	54.116	0.470941	16.9782	1.45308	0.0113292	7.55855	0.195119	4.92572	7.80607	4.99651	0.108329	0.0280078	1.35208
2000	1135	81.6112	54.2805	0.486005	16.8861	1.47881	0.0117603	7.68796	0.200715	4.7374	7.579	5.10693	0.112144	0.0290737	1.40353
2000	1130	78.4465	54.3815	0.502814	16.7859	1.51025	0.0122348	7.83478	0.208818	4.54534	7.38446	5.22723	0.116324	0.0302466	1.46015
2000	1125	75.5228	54.4796	0.519492	16.6819	1.54153	0.0127084	7.9786	0.216902	4.36016	7.19595	5.34451	0.120476	0.0314175	1.51668
2000	1120	72.6673	54.587	0.537329	16.5724	1.57018	0.0132078	8.09661	0.225425	4.17338	7.02423	5.46641	0.124835	0.032652	1.57628
2000	1115	70.0782	54.6906	0.554409	16.4666	1.59812	0.0136958	8.21301	0.233753	4.00021	6.84871	5.58342	0.129075	0.0338584	1.63452
2000	1110	67.6697	54.7914	0.571369	16.358	1.62594	0.0141832	8.32675	0.242073	3.8336	6.67797	5.69769	0.133289	0.0350635	1.69269
2000	1105	65.4229	54.8894	0.588221	16.2467	1.65368	0.0146703	8.43798	0.250387	3.67326	6.51185	5.80929	0.137477	0.0362677	1.75083
2000	1100	63.3214	54.9847	0.604974	16.1328	1.68138	0.0151572	8.54686	0.258696	3.51897	6.35019	5.91831	0.14164	0.0374713	1.80893
2000	1095	61.3512	55.0772	0.621638	16.0164	1.70905	0.015644	8.65351	0.267004	3.37046	6.19284	6.0248	0.145779	0.0386747	1.86702
2000	1090	59.4996	55.1669	0.638222	15.8977	1.73672	0.0161308	8.75807	0.275313	3.22752	6.03964	6.12884	0.149894	0.0398782	1.92512
2000	1085	57.7478	55.2594	0.65433	15.7772	1.7639	0.0148898	8.85722	0.283665	3.08914	5.89032	6.23132	0.154009	0.0410879	1.98352
2000	1080	56.091	55.3516	0.670074	15.6548	1.79086	0.0131111	8.95273	0.292044	2.95563	5.74478	6.33187	0.158113	0.0423015	2.04211
2000	1075	54.5226	55.4423	0.68551	15.5304	1.81773	0.0112687	9.04547	0.300445	2.827	5.60292	6.43035	0.162203	0.0435184	2.10085
2000	1070	53.0343	55.5321	0.700517	15.4043	1.84446	0.00935693	9.1351	0.308876	2.70301	5.46457	6.52693	0.166283	0.0447397	2.15981
2000	1065	51.6182	55.6216	0.7149	15.2764	1.87099	0.00738607	9.22114	0.31735	2.58347	5.32958	6.62177	0.170358	0.0459671	2.21906
2000	1060	50.2669	55.7121	0.72836	15.1469	1.8972	0.00539942	9.30285	0.325881	2.46815	5.19777	6.71511	0.174434	0.0472028	2.27872
2000	1055	48.9731	55.8047	0.740461	15.0158	1.92294	0.00349168	9.37921	0.33449	2.35688	5.06898	6.8072	0.178522	0.0484497	2.33891
2000	1050	47.7294	55.9016	0.750537	14.883	1.94797	0.0018194	9.44866	0.343206	2.24947	4.94305	6.89843	0.182633	0.0497123	2.39986
2000	1045	46.5254	56.0071	0.75728	14.7486	1.97179	0.000595386	9.50787	0.352087	2.1457	4.81979	6.98952	0.186795	0.0509987	2.46196
2000	1040	45.3262	56.1432	0.754605	14.6119	1.99167	4.19944e-05	9.53925	0.361403	2.0448	4.69856	7.08397	0.191137	0.052348	2.5271
2000	1035	43.9851	56.4163	0.715039	14.4716	1.99414	3.8623e-08	9.45698	0.372422	1.9438	4.57704	7.19835	0.19627	0.0539441	2.60415
2000	1030	42.6347	56.7462	0.661514	14.3275	1.98852	0	9.32376	0.384219	1.84629	4.45838	7.31964	0.201735	0.0556527	2.68664
2000	1025	41.3628	57.0684	0.611028	14.1802	1.98286	0	9.19181	0.396032	1.75401	4.34421	7.43773	0.207161	0.0573639	2.76925
2000	1020	40.1646	57.3816	0.563842	14.0299	1.97739	0	9.0625	0.407848	1.66665	4.23431	7.55249	0.212539	0.0590753	2.85187
2000	1015	39.0329	57.6864	0.519711	13.877	1.97206	0	8.93554	0.419673	1.58384	4.12844	7.66412	0.217875	0.0607881	2.93455
2000	1010	37.9616	57.9836	0.478416	13.7215	1.96685	0	8.81064	0.431515	1.50527	4.02637	7.77279	0.223169	0.0625035	3.01736
2000	1005	36.9456	58.2736	0.439762	13.5637	1.9617	0	8.68754	0.443382	1.43067	3.9279	7.87868	0.228426	0.0642224	3.10034
2000	1000	35.9801	58.5571	0.403575	13.4039	1.95657	0	8.56599	0.45528	1.35976	3.83284	7.98193	0.233646	0.0659457	3.18354
2000	995	35.0621	58.8346	0.369627	13.2429	1.95137	0	8.44582	0.4672	1.29229	3.74006	8.08275	0.238828	0.0676723	3.26689
2000	990	34.188	59.1066	0.33778	13.0813	1.94604	0	8.32682	0.479145	1.22805	3.64928	8.18125	0.243973	0.0694026	3.35041
2000	985	33.3541	59.3734	0.307938	12.9187	1.94057	0	8.20878	0.491125	1.16686	3.56067	8.27754	0.249082	0.0711378	3.43418
2000	980	32.5573	59.6354	0.279999	12.7552	1.93494	0	8.09151	0.503145	1.10856	3.47421	8.37169	0.254159	0.0728788	3.51823
2000	975	31.7948	59.893	0.25387	12.5908	1.92911	0	7.97481	0.515212	1.05299	3.38988	8.46382	0.259203	0.0746266	3.60261
2000	970	31.064	60.1465	0.229464	12.4256	1.92304	0	7.85847	0.527331	1.00001	3.30764	8.55401	0.264217	0.0763821	3.68735
2000	965	30.3628	60.3962	0.206698	12.2594	1.9167	0	7.74229	0.53951	0.949499	3.22749	8.64235	0.269203	0.0781461	3.77251
2000	960	29.6891	60.6425	0.185498	12.0923	1.91004	0	7.62605	0.551753	0.901325	3.14938	8.72893	0.27416	0.0799195	3.85812
2000	955	29.0388	60.8941	0.166248	11.9222	1.90197	0	7.50439	0.562093	0.855349	3.07515	8.81318	0.279097	0.0817093	3.94452
2000	950	28.3915	61.181	0.150583	11.7446	1.88828	0	7.35655	0.564104	0.806536	3.00978	8.89643	0.28415	0.0835721	4.03445
2000	945	27.7672	61.4645	0.136099	11.5668	1.87399	0	7.20842	0.565982	0.75978	2.94595	8.97863	0.289193	0.0854509	4.12515
2000	940	27.1647	61.7452	0.122747	11.3887	1.85906	0	7.05984	0.56765	0.715066	2.88372	9.05978	0.294225	0.0873461	4.21664
2000	935	26.5829	62.0231	0.110462	11.2103	1.84346	0	6.91086	0.569115	0.672336	2.82307	9.1399	0.299245	0.089258	4.30894
2000	930	26.0207	62.2982	0.0991799	11.0314	1.82721	0	6.76154	0.570387	0.631539	2.76398	9.21901	0.304252	0.0911865	4.40204
2000	925	25.4772	62.5708	0.088841	10.8522	1.81029	0	6.61197	0.571473	0.592622	2.70642	9.29712	0.309244	0.0931318	4.49595
2000	920	24.9515	62.8407	0.0793868	10.6725	1.79272	0	6.46222	0.572384	0.555534	2.65038	9.37425	0.314219	0.095094	4.59067
2000	915	24.4428	63.1081	0.0707612	10.4923	1.77449	0	6.31241	0.573131	0.520226	2.59584	9.45039	0.319176	0.0970729	4.6862
2000	910	23.9505	63.3729	0.0629102	10.3115	1.75561	0	6.16263	0.573724	0.48665	2.54278	9.52557	0.324113	0.0990684	4.78254
2000	905	23.4737	63.6352	0.0557819	10.1303	1.73609	0	6.013	0.574174	0.454754	2.49119	9.59977	0.329026	0.10108	4.87967
2000	900	23.012	63.895	0.0493269	9.94851	1.71594	0	5.86364	0.574494	0.424491	2.44104	9.673	0.333914	0.103109	4.97758
Title:	R-magma	-	residual	from	MZ-magma	at	T	=	1145	C
liquid_0	thermodynamic	data	and	composition:
Pressure	Temperature	mass	S	H	V	Cp	viscosity	SiO2	TiO2	Al2O3	Fe2O3	Cr2O3	FeO	MnO	MgO	CaO	Na2O	K2O	P2O5	H2O	Mg#
2000	1400	100.006	298.08	-1.20501e+06	40.0185	150.23	1.729	53.5261	0.414357	16.7678	1.28032	0.00959721	7.15244	0.169759	5.973	8.98194	4.46299	0.0925775	0.023726	1.14538	59.8
2000	1400	100.006	298.08	-1.20501e+06	40.0185	150.23	1.729	53.5261	0.414357	16.7678	1.28032	0.00959721	7.15244	0.169759	5.973	8.98194	4.46299	0.0925775	0.023726	1.14538	59.8
2000	1395	100.006	297.631	-1.20576e+06	40.0002	150.228	1.747	53.526	0.414357	16.7678	1.28108	0.00959721	7.15176	0.169759	5.97299	8.98193	4.46299	0.0925774	0.023726	1.14537	59.8
2000	1390	100.006	297.18	-1.20651e+06	39.9819	150.226	1.765	53.526	0.414357	16.7678	1.28187	0.0095972	7.15104	0.169759	5.97299	8.98193	4.46298	0.0925774	0.023726	1.14537	59.8
2000	1385	100.006	296.728	-1.20726e+06	39.9637	150.223	1.783	53.5259	0.414356	16.7678	1.2827	0.00959719	7.15028	0.169759	5.97298	8.98192	4.46298	0.0925773	0.023726	1.14537	59.8
2000	1380	100.006	296.274	-1.20802e+06	39.9454	150.221	1.802	53.5259	0.414356	16.7678	1.28357	0.00959718	7.14949	0.169759	5.97298	8.98191	4.46298	0.0925772	0.0237259	1.14537	59.8
2000	1375	100.006	295.82	-1.20877e+06	39.9272	150.219	1.82	53.5258	0.414356	16.7678	1.28449	0.00959717	7.14866	0.169759	5.97297	8.9819	4.46297	0.0925771	0.0237259	1.14537	59.8
2000	1370	100.006	295.364	-1.20952e+06	39.9089	150.217	1.839	53.5258	0.414355	16.7678	1.28544	0.00959717	7.1478	0.169758	5.97297	8.98189	4.46297	0.092577	0.0237259	1.14537	59.8
2000	1365	100.006	294.906	-1.21027e+06	39.8907	150.214	1.858	53.5257	0.414355	16.7677	1.28643	0.00959716	7.1469	0.169758	5.97296	8.98188	4.46296	0.0925769	0.0237259	1.14537	59.8
2000	1360	100.006	294.447	-1.21103e+06	39.8725	150.212	1.876	53.5257	0.414355	16.7677	1.28746	0.00959715	7.14596	0.169758	5.97295	8.98188	4.46296	0.0925768	0.0237258	1.14537	59.8
2000	1355	100.006	293.987	-1.21178e+06	39.8542	150.21	1.895	53.5256	0.414354	16.7677	1.28854	0.00959714	7.14498	0.169758	5.97295	8.98187	4.46295	0.0925767	0.0237258	1.14537	59.8
2000	1350	100.007	293.525	-1.21253e+06	39.836	150.208	1.914	53.5256	0.414354	16.7677	1.28966	0.00959712	7.14397	0.169758	5.97294	8.98186	4.46295	0.0925766	0.0237258	1.14536	59.8
2000	1345	100.007	293.062	-1.21328e+06	39.8178	150.206	1.934	53.5255	0.414353	16.7677	1.29082	0.00959711	7.14291	0.169757	5.97293	8.98185	4.46294	0.0925765	0.0237258	1.14536	59.8
2000	1340	100.007	292.597	-1.21404e+06	39.7996	150.204	1.953	53.5254	0.414353	16.7676	1.29203	0.0095971	7.14182	0.169757	5.97293	8.98183	4.46294	0.0925764	0.0237257	1.14536	59.8
2000	1335	100.007	292.131	-1.21479e+06	39.7815	150.202	1.972	53.5254	0.414352	16.7676	1.29328	0.00959709	7.14068	0.169757	5.97292	8.98182	4.46293	0.0925763	0.0237257	1.14536	59.8
2000	1330	100.007	291.664	-1.21554e+06	39.7633	150.2	1.992	53.5253	0.414352	16.7676	1.29457	0.00959708	7.1395	0.169757	5.97291	8.98181	4.46293	0.0925762	0.0237257	1.14536	59.9
2000	1325	100.007	291.195	-1.2163e+06	39.7451	150.198	2.012	53.5252	0.414351	16.7676	1.29591	0.00959706	7.13829	0.169757	5.9729	8.9818	4.46292	0.0925761	0.0237256	1.14536	59.9
2000	1320	100.007	290.725	-1.21705e+06	39.727	150.196	2.031	53.5252	0.41435	16.7676	1.2973	0.00959705	7.13703	0.169756	5.97289	8.98179	4.46291	0.0925759	0.0237256	1.14536	59.9
2000	1315	100.008	290.253	-1.2178e+06	39.7088	150.194	2.051	53.5251	0.41435	16.7675	1.29874	0.00959704	7.13572	0.169756	5.97289	8.98177	4.46291	0.0925758	0.0237256	1.14535	59.9
2000	1310	100.008	289.78	-1.21855e+06	39.6907	150.192	2.071	53.525	0.414349	16.7675	1.30022	0.00959702	7.13438	0.169756	5.97288	8.98176	4.4629	0.0925757	0.0237255	1.14535	59.9
2000	1305	100.008	289.305	-1.21931e+06	39.6726	150.19	2.091	53.5249	0.414349	16.7675	1.30175	0.00959701	7.13299	0.169756	5.97287	8.98175	4.46289	0.0925755	0.0237255	1.14535	59.9
2000	1300	100.008	288.829	-1.22006e+06	39.6545	150.188	2.112	53.5248	0.414348	16.7675	1.30333	0.00959699	7.13155	0.169755	5.97286	8.98173	4.46289	0.0925754	0.0237255	1.14535	59.9
2000	1295	100.008	288.351	-1.22081e+06	39.6364	150.187	2.132	53.5247	0.414347	16.7674	1.30496	0.00959698	7.13007	0.169755	5.97285	8.98172	4.46288	0.0925752	0.0237254	1.14535	59.9
2000	1290	100.008	287.872	-1.22157e+06	39.6183	150.185	2.153	53.5247	0.414347	16.7674	1.30664	0.00959696	7.12855	0.169755	5.97284	8.9817	4.46287	0.0925751	0.0237254	1.14534	59.9
2000	1285	100.008	287.391	-1.22232e+06	39.6002	150.183	2.173	53.5246	0.414346	16.7674	1.30837	0.00959694	7.12697	0.169754	5.97283	8.98169	4.46287	0.0925749	0.0237253	1.14534	59.9
2000	1280	100.009	286.909	-1.22307e+06	39.5821	150.181	2.194	53.5245	0.414345	16.7673	1.31015	0.00959693	7.12535	0.169754	5.97282	8.98167	4.46286	0.0925747	0.0237253	1.14534	59.9
2000	1275	100.009	286.425	-1.22383e+06	39.5641	150.18	2.215	53.5244	0.414344	16.7673	1.31199	0.00959691	7.12369	0.169754	5.97281	8.98165	4.46285	0.0925746	0.0237253	1.14534	59.9
2000	1270	100.009	285.939	-1.22458e+06	39.546	150.178	2.236	53.5243	0.414344	16.7673	1.31388	0.00959689	7.12197	0.169754	5.9728	8.98164	4.46284	0.0925744	0.0237252	1.14534	59.9
2000	1265	100.009	285.452	-1.22534e+06	39.528	150.176	2.257	53.5242	0.414343	16.7672	1.31582	0.00959687	7.1202	0.169753	5.97278	8.98162	4.46283	0.0925742	0.0237252	1.14533	59.9
2000	1260	100.009	284.964	-1.22609e+06	39.5099	150.175	2.279	53.5241	0.414342	16.7672	1.31782	0.00959685	7.11839	0.169753	5.97277	8.9816	4.46282	0.092574	0.0237251	1.14533	59.9
2000	1255	100.01	284.474	-1.22684e+06	39.4919	150.173	2.3	53.5239	0.414341	16.7672	1.31988	0.00959683	7.11652	0.169753	5.97276	8.98158	4.46281	0.0925738	0.0237251	1.14533	59.9
2000	1250	100.01	283.982	-1.2276e+06	39.4739	150.172	2.322	53.5238	0.41434	16.7671	1.32199	0.00959681	7.1146	0.169752	5.97275	8.98156	4.4628	0.0925736	0.023725	1.14533	59.9
2000	1245	100.01	283.489	-1.22835e+06	39.4559	150.17	2.344	53.5237	0.414339	16.7671	1.32416	0.00959679	7.11263	0.169752	5.97273	8.98154	4.46279	0.0925734	0.023725	1.14532	59.9
2000	1240	100.01	282.994	-1.22911e+06	39.4379	150.169	2.366	53.5236	0.414338	16.7671	1.32639	0.00959677	7.11061	0.169751	5.97272	8.98152	4.46278	0.0925732	0.0237249	1.14532	59.9
2000	1235	100.011	282.497	-1.22986e+06	39.42	150.167	2.388	53.5235	0.414337	16.767	1.32868	0.00959675	7.10853	0.169751	5.97271	8.9815	4.46277	0.092573	0.0237249	1.14532	60
2000	1230	100.011	281.999	-1.23061e+06	39.402	150.166	2.41	53.5233	0.414336	16.767	1.33104	0.00959673	7.10639	0.169751	5.97269	8.98148	4.46276	0.0925728	0.0237248	1.14532	60
2000	1225	100.011	281.499	-1.23137e+06	39.3841	150.165	2.432	53.5232	0.414335	16.7669	1.33345	0.0095967	7.1042	0.16975	5.97268	8.98146	4.46275	0.0925726	0.0237247	1.14531	60
2000	1220	100.011	280.997	-1.23212e+06	39.3661	150.163	2.455	53.5231	0.414334	16.7669	1.33592	0.00959668	7.10195	0.16975	5.97266	8.98144	4.46274	0.0925723	0.0237247	1.14531	60
2000	1215	100.012	280.494	-1.23288e+06	39.3482	150.162	2.477	53.5229	0.414333	16.7669	1.33846	0.00959665	7.09965	0.169749	5.97265	8.98142	4.46273	0.0925721	0.0237246	1.14531	60
2000	1210	100.012	279.989	-1.23363e+06	39.3303	150.161	2.5	53.5228	0.414332	16.7668	1.34106	0.00959663	7.09728	0.169749	5.97263	8.98139	4.46272	0.0925719	0.0237246	1.14531	60
2000	1205	100.012	279.488	-1.23438e+06	39.3124	145.91	2.523	53.5227	0.414331	16.7668	1.34373	0.0095966	7.09486	0.169748	5.97262	8.98137	4.46271	0.0925716	0.0237245	1.1453	60
2000	1200	100.012	278.994	-1.23511e+06	39.2945	145.904	2.546	53.5225	0.41433	16.7667	1.34647	0.00959658	7.09237	0.169748	5.9726	8.98134	4.46269	0.0925714	0.0237244	1.1453	60
2000	1195	100.013	278.499	-1.23585e+06	39.2767	145.897	2.57	53.5224	0.414329	16.7667	1.34927	0.00959655	7.08983	0.169748	5.97258	8.98132	4.46268	0.0925711	0.0237244	1.1453	60
2000	1190	100.013	278.001	-1.23658e+06	39.2588	145.891	2.593	53.5222	0.414328	16.7666	1.35215	0.00959652	7.08722	0.169747	5.97257	8.98129	4.46267	0.0925708	0.0237243	1.14529	60
2000	1185	100.013	277.503	-1.23731e+06	39.241	145.884	2.617	53.5221	0.414326	16.7666	1.35509	0.00959649	7.08454	0.169747	5.97255	8.98127	4.46266	0.0925706	0.0237242	1.14529	60
2000	1180	100.013	277.002	-1.23805e+06	39.2231	145.877	2.64	53.5219	0.414325	16.7665	1.35811	0.00959647	7.08181	0.169746	5.97253	8.98124	4.46264	0.0925703	0.0237242	1.14529	60
2000	1175	100.014	276.5	-1.23878e+06	39.2053	145.871	2.664	53.5217	0.414324	16.7665	1.3612	0.00959644	7.079	0.169745	5.97251	8.98121	4.46263	0.09257	0.0237241	1.14528	60.1
2000	1170	100.014	275.996	-1.23952e+06	39.1875	145.863	2.688	53.5216	0.414323	16.7664	1.36436	0.00959641	7.07613	0.169745	5.97249	8.98118	4.46261	0.0925697	0.023724	1.14528	60.1
2000	1165	100.014	275.49	-1.24025e+06	39.1697	145.856	2.713	53.5214	0.414321	16.7664	1.36759	0.00959637	7.07319	0.169744	5.97247	8.98115	4.4626	0.0925694	0.0237239	1.14527	60.1
2000	1160	97.9352	269.539	-1.21518e+06	38.4035	142.607	2.758	53.5586	0.419303	17.0297	1.36842	0.00980011	7.09608	0.173348	5.72995	8.77347	4.55296	0.0945347	0.0242276	1.16959	59
2000	1155	95.6065	262.944	-1.1866e+06	37.5369	139.01	2.799	53.6117	0.425637	17.2222	1.37415	0.0100388	7.14433	0.17757	5.51957	8.54854	4.6466	0.0967905	0.0248177	1.19808	57.9
2000	1150	91.7159	252.229	-1.13711e+06	36.0716	133.088	2.83	53.7745	0.440498	17.1531	1.40049	0.0104647	7.28768	0.183659	5.32355	8.28454	4.76613	0.100622	0.0258705	1.2489	56.5
2000	1145	88.0736	242.195	-1.09081e+06	34.7	127.544	2.861	53.9473	0.45578	17.0673	1.42699	0.0108974	7.42519	0.189437	5.12099	8.04114	4.88297	0.104489	0.0269404	1.30055	55.1
2000	1140	84.717	232.941	-1.04818e+06	33.4346	122.442	2.891	54.116	0.470941	16.9782	1.45308	0.0113292	7.55855	0.195119	4.92572	7.80607	4.99651	0.108329	0.0280078	1.35208	53.7
2000	1135	81.6112	224.373	-1.00876e+06	32.2626	117.729	2.92	54.2805	0.486005	16.8861	1.47881	0.0117603	7.68796	0.200715	4.7374	7.579	5.10693	0.112144	0.0290737	1.40353	52.3
2000	1130	78.4465	215.686	-968348	31.0588	112.966	2.94	54.3815	0.502814	16.7859	1.51025	0.0122348	7.83478	0.208818	4.54534	7.38446	5.22723	0.116324	0.0302466	1.46015	50.8
2000	1125	75.5228	207.655	-931037	29.9455	108.572	2.959	54.4796	0.519492	16.6819	1.54153	0.0127084	7.9786	0.216902	4.36016	7.19595	5.34451	0.120476	0.0314175	1.51668	49.3
2000	1120	72.6673	199.834	-894828	28.8614	104.298	2.977	54.587	0.537329	16.5724	1.57018	0.0132078	8.09661	0.225425	4.17338	7.02423	5.46641	0.124835	0.032652	1.57628	47.9
2000	1115	70.0782	192.731	-862022	27.8772	100.427	2.995	54.6906	0.554409	16.4666	1.59812	0.0136958	8.21301	0.233753	4.00021	6.84871	5.58342	0.129075	0.0338584	1.63452	46.5
2000	1110	67.6697	186.12	-831520	26.9606	96.8304	3.013	54.7914	0.571369	16.358	1.62594	0.0141832	8.32675	0.242073	3.8336	6.67797	5.69769	0.133289	0.0350635	1.69269	45.1
2000	1105	65.4229	179.948	-803084	26.1046	93.4802	3.029	54.8894	0.588221	16.2467	1.65368	0.0146703	8.43798	0.250387	3.67326	6.51185	5.80929	0.137477	0.0362677	1.75083	43.7
2000	1100	63.3214	174.173	-776502	25.3031	90.3512	3.045	54.9847	0.604974	16.1328	1.68138	0.0151572	8.54686	0.258696	3.51897	6.35019	5.91831	0.14164	0.0374713	1.80893	42.3
2000	1095	61.3512	168.754	-751593	24.5507	87.4215	3.06	55.0772	0.621638	16.0164	1.70905	0.015644	8.65351	0.267004	3.37046	6.19284	6.0248	0.145779	0.0386747	1.86702	40.9
2000	1090	59.4996	163.659	-728197	23.8428	84.6721	3.074	55.1669	0.638222	15.8977	1.73672	0.0161308	8.75807	0.275313	3.22752	6.03964	6.12884	0.149894	0.0398782	1.92512	39.6
2000	1085	57.7478	158.839	-706108	23.1731	82.0747	3.088	55.2594	0.65433	15.7772	1.7639	0.0148898	8.85722	0.283665	3.08914	5.89032	6.23132	0.154009	0.0410879	1.98352	38.3
2000	1080	56.091	154.278	-685243	22.5393	79.6217	3.102	55.3516	0.670074	15.6548	1.79086	0.0131111	8.95273	0.292044	2.95563	5.74478	6.33187	0.158113	0.0423015	2.04211	37
2000	1075	54.5226	149.959	-665509	21.9387	77.303	3.115	55.4423	0.68551	15.5304	1.81773	0.0112687	9.04547	0.300445	2.827	5.60292	6.43035	0.162203	0.0435184	2.10085	35.8
2000	1070	53.0343	145.859	-646804	21.3684	75.106	3.127	55.5321	0.700517	15.4043	1.84446	0.00935693	9.1351	0.308876	2.70301	5.46457	6.52693	0.166283	0.0447397	2.15981	34.5
2000	1065	51.6182	141.957	-629029	20.8254	73.0189	3.139	55.6216	0.7149	15.2764	1.87099	0.00738607	9.22114	0.31735	2.58347	5.32958	6.62177	0.170358	0.0459671	2.21906	33.3
2000	1060	50.2669	138.233	-612097	20.3071	71.0306	3.15	55.7121	0.72836	15.1469	1.8972	0.00539942	9.30285	0.325881	2.46815	5.19777	6.71511	0.174434	0.0472028	2.27872	32.1
2000	1055	48.9731	134.668	-595922	19.8109	69.1304	3.162	55.8047	0.740461	15.0158	1.92294	0.00349168	9.37921	0.33449	2.35688	5.06898	6.8072	0.178522	0.0484497	2.33891	30.9
2000	1050	47.7294	131.242	-580415	19.3343	67.3071	3.173	55.9016	0.750537	14.883	1.94797	0.0018194	9.44866	0.343206	2.24947	4.94305	6.89843	0.182633	0.0497123	2.39986	29.8
2000	1045	46.5254	127.929	-565470	18.8738	65.5462	3.184	56.0071	0.75728	14.7486	1.97179	0.000595386	9.50787	0.352087	2.1457	4.81979	6.98952	0.186795	0.0509987	2.46196	28.7
2000	1040	45.3262	124.641	-550756	18.4188	63.7989	3.197	56.1432	0.754605	14.6119	1.99167	4.19944e-05	9.53925	0.361403	2.0448	4.69856	7.08397	0.191137	0.052348	2.5271	27.6
2000	1035	43.9851	121.016	-534967	17.9267	61.8639	3.219	56.4163	0.715039	14.4716	1.99414	3.8623e-08	9.45698	0.372422	1.9438	4.57704	7.19835	0.19627	0.0539441	2.60415	26.8
2000	1030	42.6347	117.382	-519310	17.4364	59.924	3.246	56.7462	0.661514	14.3275	1.98852	0	9.32376	0.384219	1.84629	4.45838	7.31964	0.201735	0.0556527	2.68664	26.1
2000	1025	41.3628	113.957	-504552	16.9734	58.0994	3.27	57.0684	0.611028	14.1802	1.98286	0	9.19181	0.396032	1.75401	4.34421	7.43773	0.207161	0.0573639	2.76925	25.4
2000	1020	40.1646	110.727	-490631	16.5358	56.3824	3.293	57.3816	0.563842	14.0299	1.97739	0	9.0625	0.407848	1.66665	4.23431	7.55249	0.212539	0.0590753	2.85187	24.7
2000	1015	39.0329	107.674	-477468	16.1213	54.7625	3.314	57.6864	0.519711	13.877	1.97206	0	8.93554	0.419673	1.58384	4.12844	7.66412	0.217875	0.0607881	2.93455	24
2000	1010	37.9616	104.781	-464994	15.7278	53.231	3.334	57.9836	0.478416	13.7215	1.96685	0	8.81064	0.431515	1.50527	4.02637	7.77279	0.223169	0.0625035	3.01736	23.3
2000	1005	36.9456	102.036	-453151	15.3534	51.7799	3.353	58.2736	0.439762	13.5637	1.9617	0	8.68754	0.443382	1.43067	3.9279	7.87868	0.228426	0.0642224	3.10034	22.7
2000	1000	35.9801	99.4249	-441886	14.9968	50.4025	3.37	58.5571	0.403575	13.4039	1.95657	0	8.56599	0.45528	1.35976	3.83284	7.98193	0.233646	0.0659457	3.18354	22.1
2000	995	35.0621	96.9405	-431167	14.6568	49.094	3.385	58.8346	0.369627	13.2429	1.95137	0	8.44582	0.4672	1.29229	3.74006	8.08275	0.238828	0.0676723	3.26689	21.4
2000	990	34.188	94.5731	-420954	14.3322	47.8492	3.4	59.1066	0.33778	13.0813	1.94604	0	8.32682	0.479145	1.22805	3.64928	8.18125	0.243973	0.0694026	3.35041	20.8
2000	985	33.3541	92.313	-411204	14.0218	46.6628	3.414	59.3734	0.307938	12.9187	1.94057	0	8.20878	0.491125	1.16686	3.56067	8.27754	0.249082	0.0711378	3.43418	20.2
2000	980	32.5573	90.1521	-401883	13.7245	45.5301	3.426	59.6354	0.279999	12.7552	1.93494	0	8.09151	0.503145	1.10856	3.47421	8.37169	0.254159	0.0728788	3.51823	19.6
2000	975	31.7948	88.0829	-392958	13.4393	44.4472	3.437	59.893	0.25387	12.5908	1.92911	0	7.97481	0.515212	1.05299	3.38988	8.46382	0.259203	0.0746266	3.60261	19.1
2000	970	31.064	86.0989	-384401	13.1654	43.4104	3.448	60.1465	0.229464	12.4256	1.92304	0	7.85847	0.527331	1.00001	3.30764	8.55401	0.264217	0.0763821	3.68735	18.5
2000	965	30.3628	84.1941	-376187	12.9019	42.4163	3.457	60.3962	0.206698	12.2594	1.9167	0	7.74229	0.53951	0.949499	3.22749	8.64235	0.269203	0.0781461	3.77251	17.9
2000	960	29.6891	82.363	-368291	12.6482	41.462	3.466	60.6425	0.185498	12.0923	1.91004	0	7.62605	0.551753	0.901325	3.14938	8.72893	0.27416	0.0799195	3.85812	17.4
2000	955	29.0388	80.5953	-360689	12.4034	40.5417	3.474	60.8941	0.166248	11.9222	1.90197	0	7.50439	0.562093	0.855349	3.07515	8.81318	0.279097	0.0817093	3.94452	16.9
2000	950	28.3915	78.8405	-353214	12.1616	39.6267	3.485	61.181	0.150583	11.7446	1.88828	0	7.35655	0.564104	0.806536	3.00978	8.89643	0.28415	0.0835721	4.03445	16.3
2000	945	27.7672	77.1479	-346000	11.928	38.7451	3.495	61.4645	0.136099	11.5668	1.87399	0	7.20842	0.565982	0.75978	2.94595	8.97863	0.289193	0.0854509	4.12515	15.8
2000	940	27.1647	75.5143	-339036	11.702	37.895	3.504	61.7452	0.122747	11.3887	1.85906	0	7.05984	0.56765	0.715066	2.88372	9.05978	0.294225	0.0873461	4.21664	15.3
2000	935	26.5829	73.9365	-332308	11.4833	37.0749	3.512	62.0231	0.110462	11.2103	1.84346	0	6.91086	0.569115	0.672336	2.82307	9.1399	0.299245	0.089258	4.30894	14.8
2000	930	26.0207	72.412	-325805	11.2715	36.2833	3.519	62.2982	0.0991799	11.0314	1.82721	0	6.76154	0.570387	0.631539	2.76398	9.21901	0.304252	0.0911865	4.40204	14.3
2000	925	25.4772	70.938	-319515	11.0664	35.5186	3.525	62.5708	0.088841	10.8522	1.81029	0	6.61197	0.571473	0.592622	2.70642	9.29712	0.309244	0.0931318	4.49595	13.8
2000	920	24.9515	69.5122	-313429	10.8676	34.7797	3.53	62.8407	0.0793868	10.6725	1.79272	0	6.46222	0.572384	0.555534	2.65038	9.37425	0.314219	0.095094	4.59067	13.3
2000	915	24.4428	68.1326	-307536	10.6748	34.0654	3.534	63.1081	0.0707612	10.4923	1.77449	0	6.31241	0.573131	0.520226	2.59584	9.45039	0.319176	0.0970729	4.6862	12.8
2000	910	23.9505	66.797	-301830	10.4877	33.3745	3.537	63.3729	0.0629102	10.3115	1.75561	0	6.16263	0.573724	0.48665	2.54278	9.52557	0.324113	0.0990684	4.78254	12.3
2000	905	23.4737	65.5036	-296301	10.3063	32.706	3.539	63.6352	0.0557819	10.1303	1.73609	0	6.013	0.574174	0.454754	2.49119	9.59977	0.329026	0.10108	4.87967	11.9
2000	900	23.012	64.2507	-290943	10.1301	32.0591	3.54	63.895	0.0493269	9.94851	1.71594	0	5.86364	0.574494	0.424491	2.44104	9.673	0.333914	0.103109	4.97758	11.4
olivine_0	thermodynamic	data	and	composition:
Pressure	Temperature	mass	S	H	V	Cp	formula	SiO2	TiO2	Al2O3	Fe2O3	Cr2O3	FeO	MnO	MgO	CaO	Na2O	K2O	P2O5	H2O
2000	1150	0.340083	0.807504	-4081.14	0.102473	0.416609	(Ca0.01Mg0.80Fe''0.19Mn0.00Co0.00Ni0.00)2SiO4	39.2112	0	0	0	0	18.0195	0.389438	42.0098	0.370057	0	0	0	0
2000	1145	0.39066	0.925108	-4665.38	0.117404	0.477225	(Ca0.00Mg0.80Fe''0.20Mn0.00Co0.00Ni0.00)2SiO4	39.1035	0	0	0	0	18.5772	0.410578	41.5451	0.363615	0	0	0	0
2000	1140	0.35859	0.84686	-4261.1	0.107479	0.436798	(Ca0.00Mg0.79Fe''0.21Mn0.00Co0.00Ni0.00)2SiO4	38.9938	0	0	0	0	19.1454	0.432253	41.0711	0.357424	0	0	0	0
2000	1135	0.329396	0.775776	-3894.2	0.09846	0.400069	(Ca0.00Mg0.78Fe''0.21Mn0.00Co0.00Ni0.00)2SiO4	38.8818	0	0	0	0	19.7247	0.454497	40.5875	0.35148	0	0	0	0
2000	955	0.020747	0.043153	-185.283	0.005443	0.021895	(Ca0.00Mg0.40Fe''0.57Mn0.04Co0.00Ni0.00)2SiO4	33.6293	0	0	0	0	45.4504	2.82176	17.8084	0.29018	0	0	0	0
2000	950	0.107219	0.222132	-949.146	0.028026	0.112693	(Ca0.00Mg0.39Fe''0.58Mn0.04Co0.00Ni0.00)2SiO4	33.4874	0	0	0	0	46.1441	2.887	17.1929	0.288606	0	0	0	0
2000	945	0.10261	0.211741	-900.419	0.026721	0.107414	(Ca0.00Mg0.38Fe''0.59Mn0.04Co0.00Ni0.00)2SiO4	33.3471	0	0	0	0	46.8295	2.95183	16.5846	0.286917	0	0	0	0
2000	940	0.09903	0.203542	-861.478	0.025695	0.103252	(Ca0.00Mg0.36Fe''0.60Mn0.04Co0.00Ni0.00)2SiO4	33.209	0	0	0	0	47.5047	3.01575	15.9855	0.285109	0	0	0	0
2000	935	0.095608	0.195729	-824.576	0.024717	0.099291	(Ca0.00Mg0.35Fe''0.61Mn0.04Co0.00Ni0.00)2SiO4	33.0732	0	0	0	0	48.1683	3.0787	15.3966	0.283178	0	0	0	0
2000	930	0.092326	0.188259	-789.522	0.023783	0.095509	(Ca0.00Mg0.34Fe''0.62Mn0.04Co0.00Ni0.00)2SiO4	32.94	0	0	0	0	48.8193	3.14065	14.819	0.281123	0	0	0	0
2000	925	0.089168	0.1811	-756.146	0.022889	0.091889	(Ca0.00Mg0.33Fe''0.63Mn0.04Co0.00Ni0.00)2SiO4	32.8095	0	0	0	0	49.4567	3.20156	14.2533	0.278944	0	0	0	0
2000	920	0.086122	0.174218	-724.299	0.022031	0.088413	(Ca0.00Mg0.32Fe''0.64Mn0.04Co0.00Ni0.00)2SiO4	32.682	0	0	0	0	50.0795	3.26143	13.7005	0.276643	0	0	0	0
2000	915	0.083173	0.167589	-693.85	0.021205	0.085069	(Ca0.00Mg0.31Fe''0.65Mn0.04Co0.00Ni0.00)2SiO4	32.5575	0	0	0	0	50.6869	3.32027	13.1611	0.274221	0	0	0	0
2000	910	0.080314	0.161189	-664.685	0.020408	0.081844	(Ca0.00Mg0.29Fe''0.66Mn0.04Co0.00Ni0.00)2SiO4	32.4363	0	0	0	0	51.2783	3.37808	12.6357	0.271684	0	0	0	0
2000	905	0.077534	0.154999	-636.706	0.019638	0.078729	(Ca0.00Mg0.28Fe''0.67Mn0.05Co0.00Ni0.00)2SiO4	32.3183	0	0	0	0	51.8531	3.43491	12.1246	0.269036	0	0	0	0
2000	900	0.074828	0.149004	-609.831	0.018893	0.075715	(Ca0.00Mg0.27Fe''0.68Mn0.05Co0.00Ni0.00)2SiO4	32.2038	0	0	0	0	52.4109	3.4908	11.6282	0.266283	0	0	0	0
clinopyroxene_1	thermodynamic	data	and	composition:
Pressure	Temperature	mass	S	H	V	Cp	structure	formula	SiO2	TiO2	Al2O3	Fe2O3	Cr2O3	FeO	MnO	MgO	CaO	Na2O	K2O	P2O5	H2O
2000	1120	0.969261	2.27315	-11896.6	0.295677	1.17704	cpx	Na0.01Ca0.25Fe''0.41Mg1.23Fe'''0.03Ti0.00Al0.15Si1.91O6	52.4786	0.119466	3.45348	1.05789	0	13.6057	0	22.7089	6.47215	0.103704	0	0	0
2000	1115	0.808264	1.89109	-9895.62	0.246199	0.979772	cpx	Na0.01Ca0.25Fe''0.42Mg1.22Fe'''0.03Ti0.00Al0.15Si1.91O6	52.3858	0.125946	3.45433	1.07731	0	13.9262	0	22.4997	6.4254	0.105271	0	0	0
2000	1110	0.753334	1.75838	-9199.49	0.229124	0.911535	cpx	Na0.01Ca0.25Fe''0.44Mg1.21Fe'''0.03Ti0.00Al0.15Si1.91O6	52.2921	0.13254	3.45494	1.09687	0	14.2518	0	22.2894	6.37558	0.106802	0	0	0
2000	1105	0.70357	1.63829	-8569.31	0.213663	0.849764	cpx	Na0.01Ca0.25Fe''0.45Mg1.20Fe'''0.03Ti0.00Al0.15Si1.91O6	52.1974	0.139242	3.45531	1.11657	0	14.5828	0	22.0776	6.32277	0.108295	0	0	0
2000	1100	0.65832	1.52923	-7996.74	0.199613	0.793641	cpx	Na0.01Ca0.25Fe''0.46Mg1.19Fe'''0.03Ti0.00Al0.15Si1.91O6	52.1016	0.146049	3.45545	1.13646	0	14.9196	0	21.8641	6.26702	0.109749	0	0	0
2000	1095	0.617034	1.42984	-7474.72	0.186802	0.742475	cpx	Na0.01Ca0.24Fe''0.47Mg1.18Fe'''0.03Ti0.00Al0.15Si1.91O6	52.0045	0.152955	3.45537	1.15656	0	15.2625	0	21.6486	6.20838	0.111162	0	0	0
2000	1090	0.579243	1.33898	-6997.27	0.175082	0.695679	cpx	Na0.01Ca0.24Fe''0.48Mg1.17Fe'''0.03Ti0.00Al0.15Si1.91O6	51.9061	0.159956	3.45508	1.17691	0	15.6117	0	21.4308	6.14691	0.112533	0	0	0
2000	1085	0.54367	1.25365	-6548.76	0.164065	0.651702	cpx	Na0.01Ca0.24Fe''0.49Mg1.16Fe'''0.03Ti0.00Al0.15Si1.91O6	51.8069	0.166961	3.45415	1.1973	0	15.9669	0	21.2112	6.08278	0.113852	0	0	0
2000	1080	0.51146	1.17645	-6142.73	0.154093	0.611899	cpx	Na0.01Ca0.24Fe''0.50Mg1.15Fe'''0.03Ti0.00Al0.15Si1.91O6	51.7065	0.173977	3.45278	1.21786	0	16.3286	0	20.9892	6.01602	0.115122	0	0	0
2000	1075	0.481896	1.10566	-5770.31	0.144944	0.575392	cpx	Na0.01Ca0.24Fe''0.52Mg1.14Fe'''0.03Ti0.01Al0.15Si1.91O6	51.6048	0.181003	3.45103	1.23865	0	16.6971	0	20.7644	5.9467	0.116341	0	0	0
2000	1070	0.45451	1.04019	-5425.66	0.136476	0.541604	cpx	Na0.01Ca0.23Fe''0.53Mg1.13Fe'''0.04Ti0.01Al0.15Si1.91O6	51.5017	0.187997	3.44885	1.25967	0	17.0726	0	20.5367	5.8749	0.117507	0	0	0
2000	1065	0.42908	0.979484	-5105.97	0.128619	0.510262	cpx	Na0.01Ca0.23Fe''0.54Mg1.12Fe'''0.04Ti0.01Al0.15Si1.91O6	51.3975	0.194893	3.44609	1.28088	0	17.4552	0	20.306	5.80081	0.118616	0	0	0
2000	1060	0.405423	0.923095	-4808.92	0.121316	0.481133	cpx	Na0.01Ca0.23Fe''0.55Mg1.11Fe'''0.04Ti0.01Al0.15Si1.91O6	51.2922	0.201595	3.44259	1.30221	0	17.8448	0	20.0722	5.72464	0.119666	0	0	0
2000	1055	0.383389	0.870656	-4532.58	0.11452	0.454032	cpx	Na0.01Ca0.23Fe''0.57Mg1.10Fe'''0.04Ti0.01Al0.15Si1.90O6	51.1864	0.207963	3.43809	1.32357	0	18.2411	0	19.8355	5.64677	0.120653	0	0	0
2000	1050	0.362856	0.821864	-4275.44	0.108193	0.428805	cpx	Na0.01Ca0.22Fe''0.58Mg1.09Fe'''0.04Ti0.01Al0.15Si1.90O6	51.0805	0.213783	3.43218	1.34477	0	18.6433	0	19.5962	5.56775	0.121574	0	0	0
2000	1045	0.343722	0.776462	-4036.2	0.102303	0.405323	cpx	Na0.01Ca0.22Fe''0.59Mg1.08Fe'''0.04Ti0.01Al0.15Si1.90O6	50.9759	0.21865	3.42408	1.36541	0	19.0499	0	19.355	5.48869	0.122426	0	0	0
2000	1040	0.325863	0.734158	-3813.68	0.096818	0.383449	cpx	Na0.01Ca0.22Fe''0.61Mg1.07Fe'''0.04Ti0.01Al0.15Si1.90O6	50.8795	0.220763	3.40993	1.38336	0	19.4511	0	19.1178	5.41434	0.123201	0	0	0
2000	1035	0.308157	0.692441	-3596.55	0.091424	0.361932	cpx	Na0.01Ca0.22Fe''0.62Mg1.06Fe'''0.04Ti0.01Al0.15Si1.90O6	50.8252	0.211995	3.37165	1.38821	0	19.7971	0	18.9157	5.36629	0.123855	0	0	0
2000	1030	0.289449	0.648701	-3369.88	0.085762	0.33936	cpx	Na0.01Ca0.21Fe''0.63Mg1.05Fe'''0.04Ti0.01Al0.15Si1.91O6	50.7902	0.1987	3.32268	1.38674	0	20.1166	0	18.7311	5.32957	0.124438	0	0	0
2000	1025	0.271977	0.60794	-3158.58	0.080479	0.31831	cpx	Na0.01Ca0.21Fe''0.64Mg1.04Fe'''0.04Ti0.01Al0.14Si1.91O6	50.7542	0.185828	3.27397	1.3851	0	20.4384	0	18.5457	5.29175	0.124982	0	0	0
2000	1020	0.255903	0.570495	-2964.38	0.075622	0.29896	cpx	Na0.01Ca0.21Fe''0.65Mg1.03Fe'''0.04Ti0.00Al0.14Si1.91O6	50.7167	0.173515	3.22584	1.38352	0	20.7637	0	18.3587	5.25251	0.125487	0	0	0
2000	1015	0.241076	0.536008	-2785.44	0.071145	0.281128	cpx	Na0.01Ca0.21Fe''0.66Mg1.02Fe'''0.04Ti0.00Al0.14Si1.91O6	50.6775	0.161744	3.17826	1.38199	0	21.0927	0	18.1699	5.21194	0.125953	0	0	0
2000	1010	0.22734	0.504108	-2619.85	0.066999	0.264623	cpx	Na0.01Ca0.21Fe''0.68Mg1.01Fe'''0.04Ti0.00Al0.14Si1.91O6	50.6367	0.150496	3.13118	1.38053	0	21.4256	0	17.979	5.17013	0.12638	0	0	0
2000	1005	0.214581	0.474528	-2466.23	0.063151	0.249308	cpx	Na0.01Ca0.21Fe''0.69Mg1.00Fe'''0.04Ti0.00Al0.14Si1.91O6	50.5941	0.139757	3.08459	1.37915	0	21.7625	0	17.786	5.12714	0.126767	0	0	0
2000	1000	0.00064	0.00139	-7.88121	0.000192	0.000732	cpx	Na0.03Ca0.76Fe''0.35Mg0.72Fe'''0.06Ti0.02Al0.19Si1.87O6	49.5766	0.677441	4.39223	2.24658	0	11.224	0	12.7439	18.7134	0.425922	0	0	0
clinopyroxene_0	thermodynamic	data	and	composition:
Pressure	Temperature	mass	S	H	V	Cp	structure	formula	SiO2	TiO2	Al2O3	Fe2O3	Cr2O3	FeO	MnO	MgO	CaO	Na2O	K2O	P2O5	H2O
2000	1160	2.07908	4.84937	-26652.8	0.644365	2.48442	cpx	Na0.01Ca0.73Fe''0.19Mg0.95Fe'''0.03Ti0.00Al0.19Si1.89O6	51.7729	0.179699	4.36218	1.25677	0	6.06021	0	17.3971	18.7648	0.206323	0	0	0
2000	1155	1.93598	4.50781	-24792.3	0.599402	2.31127	cpx	Na0.02Ca0.73Fe''0.19Mg0.94Fe'''0.04Ti0.01Al0.19Si1.89O6	51.6602	0.191617	4.46641	1.28894	0	6.22296	0	17.2903	18.6669	0.21259	0	0	0
2000	1150	1.45466	3.38236	-18595.7	0.449901	1.73575	cpx	Na0.02Ca0.72Fe''0.20Mg0.94Fe'''0.04Ti0.01Al0.19Si1.89O6	51.6331	0.201561	4.44272	1.30396	0	6.50175	0	17.3124	18.3888	0.21578	0	0	0
2000	1145	1.2172	2.82586	-15532.6	0.376049	1.45139	cpx	Na0.02Ca0.71Fe''0.21Mg0.94Fe'''0.04Ti0.01Al0.19Si1.89O6	51.5965	0.212493	4.42224	1.3217	0	6.77241	0	17.3011	18.1543	0.219179	0	0	0
2000	1140	1.10203	2.55464	-14036.4	0.340087	1.31319	cpx	Na0.02Ca0.70Fe''0.22Mg0.94Fe'''0.04Ti0.01Al0.19Si1.89O6	51.5611	0.223031	4.39999	1.33833	0	7.06108	0	17.2985	17.8958	0.222296	0	0	0
2000	1135	1.00272	2.32103	-12745.4	0.309077	1.1941	cpx	Na0.02Ca0.69Fe''0.23Mg0.95Fe'''0.04Ti0.01Al0.19Si1.89O6	51.5279	0.232859	4.37494	1.35339	0	7.3741	0	17.3092	17.6026	0.224997	0	0	0
2000	1130	0.723494	1.67114	-9183.69	0.222771	0.860413	cpx	Na0.02Ca0.69Fe''0.23Mg0.94Fe'''0.04Ti0.01Al0.19Si1.89O6	51.444	0.251168	4.38958	1.38667	0	7.54872	0	17.1575	17.5918	0.230582	0	0	0
2000	1125	0.642609	1.48111	-8145.85	0.197653	0.763152	cpx	Na0.02Ca0.69Fe''0.24Mg0.93Fe'''0.04Ti0.01Al0.19Si1.89O6	51.3571	0.270733	4.40554	1.42097	0	7.72042	0	16.9994	17.5894	0.236372	0	0	0
2000	1120	0.241957	0.556292	-3064.32	0.074349	0.286851	cpx	Na0.02Ca0.70Fe''0.24Mg0.92Fe'''0.04Ti0.01Al0.19Si1.88O6	51.2502	0.296641	4.43657	1.4622	0	7.80972	0	16.7691	17.7318	0.243766	0	0	0
2000	1115	0.28902	0.662978	-3656.13	0.088719	0.342129	cpx	Na0.02Ca0.70Fe''0.24Mg0.91Fe'''0.04Ti0.01Al0.19Si1.88O6	51.1547	0.321375	4.45885	1.4991	0	7.94506	0	16.5872	17.7833	0.25044	0	0	0
2000	1110	0.253458	0.580066	-3202.52	0.077722	0.299574	cpx	Na0.02Ca0.70Fe''0.25Mg0.90Fe'''0.04Ti0.01Al0.19Si1.88O6	51.0562	0.347939	4.48233	1.5371	0	8.0796	0	16.4027	17.8368	0.257327	0	0	0
2000	1105	0.222522	0.508087	-2808.32	0.068163	0.262602	cpx	Na0.02Ca0.71Fe''0.25Mg0.89Fe'''0.04Ti0.01Al0.20Si1.88O6	50.9545	0.376507	4.50712	1.57632	0	8.21339	0	16.2155	17.8922	0.264437	0	0	0
2000	1100	0.195572	0.44551	-2465.25	0.059844	0.230435	cpx	Na0.02Ca0.71Fe''0.26Mg0.88Fe'''0.04Ti0.01Al0.20Si1.88O6	50.8492	0.407279	4.53336	1.61686	0	8.34649	0	16.0254	17.9496	0.271786	0	0	0
2000	1095	0.17207	0.39105	-2166.36	0.052595	0.20242	cpx	Na0.02Ca0.71Fe''0.26Mg0.87Fe'''0.05Ti0.01Al0.20Si1.88O6	50.74	0.440483	4.56121	1.65887	0	8.47893	0	15.8323	18.0088	0.279388	0	0	0
2000	1090	0.151563	0.343629	-1905.83	0.046276	0.178006	cpx	Na0.02Ca0.72Fe''0.27Mg0.86Fe'''0.05Ti0.01Al0.20Si1.87O6	50.6265	0.476381	4.59086	1.70249	0	8.61073	0	15.6359	18.0699	0.287258	0	0	0
2000	1085	0.136742	0.309286	-1717.31	0.041704	0.160336	cpx	Na0.02Ca0.72Fe''0.27Mg0.85Fe'''0.05Ti0.01Al0.20Si1.87O6	50.509	0.514967	4.62185	1.74751	0	8.7417	0	15.4368	18.1327	0.295385	0	0	0
2000	1080	0.121909	0.275073	-1529.09	0.037138	0.142705	cpx	Na0.02Ca0.72Fe''0.28Mg0.84Fe'''0.05Ti0.02Al0.20Si1.87O6	50.387	0.556592	4.65462	1.79422	0	8.87192	0	15.2345	18.1974	0.303795	0	0	0
2000	1075	0.108217	0.243586	-1355.59	0.032928	0.126462	cpx	Na0.02Ca0.73Fe''0.28Mg0.83Fe'''0.05Ti0.02Al0.21Si1.87O6	50.2595	0.601637	4.68953	1.84287	0	9.00144	0	15.0287	18.2638	0.312511	0	0	0
2000	1070	0.096358	0.216363	-1205.46	0.029285	0.112409	cpx	Na0.02Ca0.73Fe''0.28Mg0.82Fe'''0.05Ti0.02Al0.21Si1.86O6	50.1264	0.650373	4.7267	1.89356	0	9.13021	0	14.8192	18.332	0.321546	0	0	0
2000	1065	0.08611	0.192874	-1075.8	0.026139	0.100277	cpx	Na0.02Ca0.73Fe''0.29Mg0.81Fe'''0.05Ti0.02Al0.21Si1.86O6	49.9873	0.703012	4.76614	1.94638	0	9.25822	0	14.606	18.402	0.330907	0	0	0
2000	1060	0.077244	0.172586	-963.727	0.023419	0.089793	cpx	Na0.02Ca0.74Fe''0.29Mg0.80Fe'''0.06Ti0.02Al0.21Si1.86O6	49.8424	0.759633	4.80773	2.00132	0	9.38549	0	14.3894	18.4735	0.340594	0	0	0
2000	1055	0.069525	0.154948	-866.203	0.021052	0.080673	cpx	Na0.03Ca0.74Fe''0.30Mg0.79Fe'''0.06Ti0.02Al0.21Si1.85O6	49.692	0.820062	4.85109	2.05826	0	9.51216	0	14.1698	18.546	0.350596	0	0	0
2000	1050	0.062716	0.139421	-780.267	0.018966	0.072639	cpx	Na0.03Ca0.75Fe''0.30Mg0.78Fe'''0.06Ti0.02Al0.22Si1.85O6	49.5376	0.883611	4.89531	2.11682	0	9.6386	0	13.9482	18.619	0.360872	0	0	0
2000	1045	0.056683	0.125689	-704.197	0.017119	0.065531	cpx	Na0.03Ca0.75Fe''0.31Mg0.77Fe'''0.06Ti0.03Al0.22Si1.85O6	49.3832	0.948136	4.93801	2.17591	0	9.76575	0	13.7272	18.6905	0.371317	0	0	0
2000	1040	0.052298	0.115673	-648.815	0.015776	0.060355	cpx	Na0.03Ca0.75Fe''0.31Mg0.75Fe'''0.06Ti0.03Al0.22Si1.84O6	49.2504	1.00163	4.96664	2.22936	0	9.89774	0	13.5207	18.7522	0.381348	0	0	0
2000	1035	0.053423	0.117885	-662.056	0.016103	0.061576	cpx	Na0.03Ca0.75Fe''0.32Mg0.75Fe'''0.06Ti0.03Al0.22Si1.85O6	49.2453	0.986041	4.92107	2.24639	0	10.052	0	13.3958	18.7653	0.388116	0	0	0
2000	1030	0.04556	0.100304	-564.078	0.013726	0.052458	cpx	Na0.03Ca0.75Fe''0.32Mg0.74Fe'''0.06Ti0.03Al0.21Si1.85O6	49.2994	0.938427	4.84163	2.24581	0	10.2163	0	13.3088	18.7564	0.393323	0	0	0
2000	1025	0.034333	0.075412	-424.669	0.010338	0.039489	cpx	Na0.03Ca0.75Fe''0.33Mg0.74Fe'''0.06Ti0.03Al0.21Si1.85O6	49.3524	0.891398	4.76288	2.245	0	10.3814	0	13.2207	18.7477	0.398558	0	0	0
2000	1020	0.024867	0.054494	-307.288	0.007483	0.028571	cpx	Na0.03Ca0.75Fe''0.33Mg0.74Fe'''0.06Ti0.02Al0.21Si1.86O6	49.4026	0.845894	4.68581	2.24456	0	10.5475	0	13.1301	18.7397	0.403872	0	0	0
2000	1015	0.016984	0.037132	-209.667	0.005108	0.019493	cpx	Na0.03Ca0.75Fe''0.34Mg0.73Fe'''0.06Ti0.02Al0.20Si1.86O6	49.45	0.801822	4.61029	2.24448	0	10.7145	0	13.0372	18.7324	0.409265	0	0	0
2000	1010	0.010454	0.022802	-128.931	0.003142	0.011985	cpx	Na0.03Ca0.75Fe''0.34Mg0.73Fe'''0.06Ti0.02Al0.20Si1.86O6	49.4948	0.7591	4.53625	2.24479	0	10.8828	0	12.9419	18.7256	0.414737	0	0	0
2000	1005	0.005066	0.011022	-62.4076	0.001522	0.005801	cpx	Na0.03Ca0.75Fe''0.35Mg0.72Fe'''0.06Ti0.02Al0.20Si1.86O6	49.5369	0.717659	4.46358	2.24548	0	11.0526	0	12.8441	18.7193	0.420289	0	0	0
2000	1000	0.202701	0.447036	-2323.37	0.059571	0.235064	cpx	Na0.01Ca0.21Fe''0.70Mg0.99Fe'''0.04Ti0.00Al0.14Si1.91O6	50.5499	0.129513	3.03844	1.37784	0	22.1035	0	17.5906	5.08307	0.127114	0	0	0
2000	995	0.18917	0.416049	-2162.22	0.055515	0.218955	cpx	Na0.01Ca0.20Fe''0.71Mg0.98Fe'''0.04Ti0.00Al0.13Si1.91O6	50.5039	0.119683	2.99263	1.37649	0	22.4529	0	17.3942	5.0329	0.127338	0	0	0
2000	990	0.17615	0.386342	-2007.61	0.051618	0.203492	cpx	Na0.01Ca0.20Fe''0.72Mg0.97Fe'''0.04Ti0.00Al0.13Si1.92O6	50.4559	0.110257	2.94714	1.37507	0	22.8113	0	17.1968	4.97607	0.127427	0	0	0
2000	985	0.164662	0.36014	-1871.13	0.048179	0.189851	cpx	Na0.01Ca0.20Fe''0.74Mg0.96Fe'''0.04Ti0.00Al0.13Si1.92O6	50.406	0.101256	2.90197	1.37363	0	23.1778	0	16.9976	4.91435	0.127406	0	0	0
2000	980	0.154126	0.336149	-1746.09	0.045027	0.177352	cpx	Na0.01Ca0.20Fe''0.75Mg0.95Fe'''0.04Ti0.00Al0.13Si1.92O6	50.3541	0.0926837	2.8571	1.37218	0	23.5518	0	16.7964	4.8485	0.127285	0	0	0
2000	975	0.144443	0.314138	-1631.3	0.042133	0.165876	cpx	Na0.01Ca0.20Fe''0.76Mg0.94Fe'''0.04Ti0.00Al0.13Si1.92O6	50.3003	0.0845423	2.81254	1.37073	0	23.933	0	16.5926	4.77923	0.127074	0	0	0
2000	970	0.135525	0.2939	-1525.7	0.039469	0.155319	cpx	Na0.01Ca0.19Fe''0.78Mg0.93Fe'''0.04Ti0.00Al0.12Si1.92O6	50.2445	0.076832	2.76826	1.36928	0	24.3209	0	16.3863	4.70722	0.126781	0	0	0
2000	965	0.127294	0.275255	-1428.38	0.037012	0.145584	cpx	Na0.01Ca0.19Fe''0.79Mg0.92Fe'''0.04Ti0.00Al0.12Si1.92O6	50.1868	0.0695508	2.72424	1.36784	0	24.715	0	16.177	4.63307	0.126415	0	0	0
2000	960	0.11968	0.258038	-1338.48	0.034741	0.13659	cpx	Na0.01Ca0.19Fe''0.81Mg0.91Fe'''0.04Ti0.00Al0.12Si1.92O6	50.1274	0.0626953	2.68046	1.36638	0	25.1149	0	15.9649	4.55733	0.125984	0	0	0
2000	955	0.089529	0.192464	-997.959	0.025946	0.101963	cpx	Na0.01Ca0.18Fe''0.82Mg0.90Fe'''0.04Ti0.00Al0.12Si1.92O6	50.0677	0.0564393	2.63633	1.36451	0	25.5111	0	15.7501	4.48826	0.125608	0	0	0
orthopyroxene_0	thermodynamic	data	and	composition:
Pressure	Temperature	mass	S	H	V	Cp	structure	formula	SiO2	TiO2	Al2O3	Fe2O3	Cr2O3	FeO	MnO	MgO	CaO	Na2O	K2O	P2O5	H2O	Mg#
2000	1130	0.638501	1.51024	-7988.33	0.195623	0.795994	opx	Na0.00Ca0.08Fe''0.38Mg1.48Fe'''0.02Ti0.00Al0.10Si1.94O6	54.2574	0.0594051	2.46324	0.691115	0	12.6416	0	27.727	2.13128	0.0289113	0	0	0	79.5699
2000	1125	0.596826	1.40812	-7446.73	0.182569	0.74261	opx	Na0.00Ca0.08Fe''0.39Mg1.47Fe'''0.02Ti0.00Al0.10Si1.94O6	54.1638	0.061741	2.45445	0.700234	0	12.993	0	27.47	2.12753	0.0293115	0	0	0
spinel_0	thermodynamic	data	and	composition:
Pressure	Temperature	mass	S	H	V	Cp	formula	SiO2	TiO2	Al2O3	Fe2O3	Cr2O3	FeO	MnO	MgO	CaO	Na2O	K2O	P2O5	H2O
2000	1085	0.005545	0.011742	-38.2762	0.001224	0.005389	Fe''0.77Mg0.35Fe'''0.70Al0.58Cr0.48Ti0.12O4	0	4.91353	14.7407	27.6718	18.0187	27.582	0	7.07329	0	0	0	0	0
2000	1080	0.008692	0.018365	-58.5178	0.001909	0.008381	Fe''0.81Mg0.34Fe'''0.73Al0.54Cr0.44Ti0.15O4	0	5.72896	13.5301	28.9578	16.3897	28.724	0	6.6694	0	0	0	0	0
2000	1075	0.009455	0.019934	-62.0351	0.002067	0.009049	Fe''0.85Mg0.32Fe'''0.77Al0.49Cr0.39Ti0.17O4	0	6.71106	12.2574	30.2355	14.5333	29.9801	0	6.28267	0	0	0	0	0
2000	1070	0.010639	0.022383	-68.0278	0.002316	0.010113	Fe''0.90Mg0.30Fe'''0.81Al0.44Cr0.34Ti0.20O4	0	7.87337	10.9506	31.4243	12.4725	31.3622	0	5.91701	0	0	0	0	0
2000	1065	0.012405	0.026041	-77.3935	0.002689	0.011722	Fe''0.95Mg0.29Fe'''0.84Al0.39Cr0.28Ti0.24O4	0	9.20162	9.66445	32.4228	10.2743	32.8585	0	5.57831	0	0	0	0	0
2000	1060	0.014942	0.031293	-91.1786	0.003228	0.014049	Fe''1.01Mg0.27Fe'''0.87Al0.35Cr0.22Ti0.28O4	0	10.6486	8.46253	33.148	8.03896	34.4306	0	5.27139	0	0	0	0	0
2000	1055	0.018487	0.03862	-110.711	0.003983	0.017313	Fe''1.06Mg0.26Fe'''0.89Al0.31Cr0.16Ti0.32O4	0	12.1466	7.39215	33.574	5.86627	36.0239	0	4.99715	0	0	0	0	0
2000	1050	0.023502	0.048958	-138.597	0.005052	0.021942	Fe''1.11Mg0.25Fe'''0.90Al0.27Cr0.11Ti0.36O4	0	13.6252	6.47333	33.7359	3.83058	37.5825	0	4.75246	0	0	0	0	0
2000	1045	0.031688	0.065799	-184.595	0.006801	0.029514	Fe''1.16Mg0.24Fe'''0.90Al0.24Cr0.06Ti0.40O4	0	15.0121	5.70781	33.7125	1.98717	39.0484	0	4.53201	0	0	0	0	0
2000	1040	0.05714	0.118197	-329.609	0.012245	0.053117	Fe''1.20Mg0.23Fe'''0.90Al0.22Cr0.01Ti0.43O4	0	16.1228	5.12137	33.6733	0.486251	40.2674	0	4.32892	0	0	0	0	0
2000	1035	0.163829	0.337608	-936.81	0.035036	0.151997	Fe''1.22Mg0.22Fe'''0.92Al0.21Cr0.00Ti0.44O4	0	16.1856	4.89068	34.1954	0.0145762	40.5827	0	4.13101	0	0	0	0	0
2000	1030	0.200784	0.412436	-1138.27	0.042836	0.185917	Fe''1.21Mg0.21Fe'''0.95Al0.20Cr0.00Ti0.43O4	0	15.7619	4.80721	35.0228	0	40.4687	0	3.93939	0	0	0	0	0
2000	1025	0.187106	0.383122	-1051.74	0.039824	0.17293	Fe''1.21Mg0.20Fe'''0.97Al0.20Cr0.00Ti0.41O4	0	15.314	4.7325	35.8766	0	40.3202	0	3.7568	0	0	0	0	0
2000	1020	0.173534	0.354201	-967.281	0.03685	0.160102	Fe''1.21Mg0.19Fe'''1.00Al0.20Cr0.00Ti0.40O4	0	14.8577	4.6619	36.7463	0	40.1512	0	3.58288	0	0	0	0	0
2000	1015	0.161456	0.328497	-892.521	0.034208	0.14871	Fe''1.21Mg0.18Fe'''1.02Al0.20Cr0.00Ti0.39O4	0	14.3936	4.5952	37.6311	0	39.9628	0	3.41724	0	0	0	0	0
2000	1010	0.150664	0.305555	-826.058	0.031852	0.138549	Fe''1.20Mg0.18Fe'''1.05Al0.19Cr0.00Ti0.38O4	0	13.9221	4.53222	38.53	0	39.7561	0	3.2595	0	0	0	0	0
2000	1005	0.140985	0.285004	-766.755	0.029742	0.129453	Fe''1.20Mg0.17Fe'''1.08Al0.19Cr0.00Ti0.37O4	0	13.4439	4.47281	39.4419	0	39.5321	0	3.10932	0	0	0	0	0
2000	1000	0.132277	0.266536	-713.665	0.027847	0.121283	Fe''1.19Mg0.16Fe'''1.10Al0.19Cr0.00Ti0.35O4	0	12.9593	4.41685	40.3657	0	39.2918	0	2.96635	0	0	0	0	0
2000	995	0.124455	0.249958	-666.172	0.026146	0.113956	Fe''1.19Mg0.15Fe'''1.13Al0.19Cr0.00Ti0.34O4	0	12.4676	4.3649	41.3023	0	39.035	0	2.8302	0	0	0	0	0
2000	990	0.117392	0.235	-623.472	0.024613	0.107348	Fe''1.18Mg0.15Fe'''1.16Al0.19Cr0.00Ti0.33O4	0	11.969	4.31697	42.2511	0	38.7624	0	2.70055	0	0	0	0	0
2000	985	0.11099	0.221453	-584.937	0.023226	0.101368	Fe''1.17Mg0.14Fe'''1.19Al0.18Cr0.00Ti0.31O4	0	11.4644	4.27276	43.2104	0	38.4753	0	2.57716	0	0	0	0	0
2000	980	0.105184	0.209174	-550.124	0.021969	0.095951	Fe''1.17Mg0.13Fe'''1.22Al0.18Cr0.00Ti0.30O4	0	10.9545	4.23209	44.1789	0	38.1747	0	2.45978	0	0	0	0	0
2000	975	0.099914	0.198029	-518.632	0.02083	0.091038	Fe''1.16Mg0.13Fe'''1.24Al0.18Cr0.00Ti0.29O4	0	10.44	4.19483	45.1555	0	37.8615	0	2.34813	0	0	0	0	0
2000	970	0.095126	0.187908	-490.116	0.019796	0.086579	Fe''1.15Mg0.12Fe'''1.27Al0.18Cr0.00Ti0.27O4	0	9.92152	4.16081	46.139	0	37.5367	0	2.24197	0	0	0	0	0
2000	965	0.090777	0.178712	-464.284	0.018857	0.082532	Fe''1.14Mg0.12Fe'''1.30Al0.18Cr0.00Ti0.26O4	0	9.3997	4.12988	47.128	0	37.2014	0	2.14106	0	0	0	0	0
2000	960	0.08683	0.170361	-440.885	0.018007	0.07886	Fe''1.13Mg0.11Fe'''1.33Al0.18Cr0.00Ti0.25O4	0	8.87528	4.10187	48.1214	0	36.8563	0	2.04517	0	0	0	0	0
2000	955	0.081678	0.159709	-411.816	0.01691	0.074105	Fe''1.12Mg0.11Fe'''1.36Al0.18Cr0.00Ti0.23O4	0	8.36829	4.07195	49.0864	0	36.5184	0	1.955	0	0	0	0	0
2000	950	0.070453	0.137306	-352.939	0.014564	0.063853	Fe''1.12Mg0.10Fe'''1.38Al0.17Cr0.00Ti0.22O4	0	7.95966	4.02019	49.889	0	36.2631	0	1.86803	0	0	0	0	0
2000	945	0.066721	0.129605	-332.144	0.013771	0.060408	Fe''1.11Mg0.10Fe'''1.41Al0.17Cr0.00Ti0.21O4	0	7.55591	3.96986	50.6826	0	36.0067	0	1.78496	0	0	0	0	0
2000	940	0.063178	0.122319	-312.572	0.013021	0.057142	Fe''1.10Mg0.09Fe'''1.43Al0.17Cr0.00Ti0.20O4	0	7.15844	3.92055	51.4649	0	35.7504	0	1.70568	0	0	0	0	0
2000	935	0.059865	0.115522	-294.401	0.012321	0.054091	Fe''1.10Mg0.09Fe'''1.45Al0.17Cr0.00Ti0.19O4	0	6.76785	3.87201	52.235	0	35.4951	0	1.63	0	0	0	0	0
2000	930	0.056765	0.109178	-277.513	0.011666	0.051239	Fe''1.09Mg0.09Fe'''1.48Al0.17Cr0.00Ti0.18O4	0	6.38475	3.82401	52.9918	0	35.2417	0	1.55772	0	0	0	0	0
2000	925	0.053862	0.103252	-261.805	0.011055	0.04857	Fe''1.09Mg0.08Fe'''1.50Al0.17Cr0.00Ti0.17O4	0	6.00974	3.77631	53.7345	0	34.9908	0	1.48869	0	0	0	0	0
2000	920	0.051141	0.097711	-247.182	0.010483	0.046071	Fe''1.08Mg0.08Fe'''1.52Al0.16Cr0.00Ti0.16O4	0	5.64342	3.72867	54.4619	0	34.7433	0	1.42273	0	0	0	0	0
2000	915	0.048589	0.092528	-233.56	0.009947	0.04373	Fe''1.07Mg0.08Fe'''1.54Al0.16Cr0.00Ti0.15O4	0	5.28639	3.68088	55.1732	0	34.4999	0	1.3597	0	0	0	0	0
2000	910	0.046194	0.087677	-220.861	0.009445	0.041534	Fe''1.07Mg0.07Fe'''1.56Al0.16Cr0.00Ti0.14O4	0	4.93925	3.63271	55.8673	0	34.2613	0	1.29945	0	0	0	0	0
2000	905	0.043944	0.083132	-209.01	0.008974	0.039474	Fe''1.06Mg0.07Fe'''1.58Al0.16Cr0.00Ti0.13O4	0	4.60259	3.58396	56.5433	0	34.0283	0	1.24183	0	0	0	0	0
2000	900	0.041829	0.07887	-197.943	0.008532	0.037538	Fe''1.05Mg0.07Fe'''1.60Al0.16Cr0.00Ti0.12O4	0	4.277	3.53442	57.2002	0	33.8016	0	1.18674	0	0	0	0	0
feldspar_0	thermodynamic	data	and	composition:
Pressure	Temperature	mass	S	H	V	Cp	formula	SiO2	TiO2	Al2O3	Fe2O3	Cr2O3	FeO	MnO	MgO	CaO	Na2O	K2O	P2O5	H2O	An
2000	1155	0.393564	0.951797	-5423.37	0.147672	0.483407	K0.00Na0.28Ca0.72Al1.72Si2.28O8	50.0119	0	32.054	0	0	0	0	0	14.7753	3.14745	0.0113662	0	0	72
2000	1150	2.0968	5.06513	-28903.1	0.787162	2.57457	K0.00Na0.29Ca0.71Al1.71Si2.29O8	50.2239	0	31.9111	0	0	0	0	0	14.6079	3.24513	0.0120234	0	0
2000	1145	2.03627	4.91321	-28077.3	0.764824	2.49937	K0.00Na0.29Ca0.70Al1.70Si2.30O8	50.4351	0	31.7686	0	0	0	0	0	14.4411	3.34246	0.0127071	0	0
2000	1140	1.89795	4.57414	-26178	0.713234	2.32878	K0.00Na0.30Ca0.70Al1.70Si2.30O8	50.6483	0	31.6249	0	0	0	0	0	14.2728	3.44065	0.0134156	0	0
2000	1135	1.77561	4.27431	-24498.1	0.667606	2.17792	K0.00Na0.31Ca0.69Al1.69Si2.31O8	50.8632	0	31.4799	0	0	0	0	0	14.103	3.53965	0.0141502	0	0
2000	1130	1.80493	4.3394	-24910.7	0.678921	2.21306	K0.00Na0.32Ca0.68Al1.68Si2.32O8	51.0492	0	31.3545	0	0	0	0	0	13.9561	3.62523	0.0149311	0	0
2000	1125	1.68647	4.04944	-23283.2	0.634636	2.06705	K0.00Na0.33Ca0.67Al1.67Si2.33O8	51.2366	0	31.2281	0	0	0	0	0	13.8081	3.71144	0.0157403	0	0
2000	1120	1.64638	3.94804	-22737.1	0.619807	2.01715	K0.00Na0.33Ca0.66Al1.66Si2.34O8	51.4184	0	31.1054	0	0	0	0	0	13.6645	3.79506	0.0165806	0	0
2000	1115	1.49397	3.57793	-20638.8	0.562671	1.82973	K0.00Na0.34Ca0.66Al1.66Si2.34O8	51.6078	0	30.9777	0	0	0	0	0	13.5149	3.88214	0.0174498	0	0
2000	1110	1.404	3.3581	-19402	0.529018	1.71889	K0.00Na0.35Ca0.65Al1.65Si2.35O8	51.7987	0	30.8489	0	0	0	0	0	13.3641	3.96994	0.0183514	0	0
2000	1105	1.32303	3.16033	-18288.9	0.498731	1.61916	K0.00Na0.36Ca0.64Al1.64Si2.36O8	51.9912	0	30.719	0	0	0	0	0	13.2121	4.05842	0.0192867	0	0
2000	1100	1.24988	2.98169	-17283.2	0.471366	1.52906	K0.00Na0.36Ca0.63Al1.63Si2.37O8	52.1851	0	30.5882	0	0	0	0	0	13.0589	4.14757	0.0202576	0	0
2000	1095	1.18355	2.81973	-16371.1	0.44655	1.44737	K0.00Na0.37Ca0.63Al1.63Si2.37O8	52.3805	0	30.4564	0	0	0	0	0	12.9046	4.23734	0.0212656	0	0
2000	1090	1.12318	2.67237	-15541	0.423964	1.37303	K0.00Na0.38Ca0.62Al1.62Si2.38O8	52.5771	0	30.3237	0	0	0	0	0	12.7492	4.32769	0.0223127	0	0
2000	1085	1.06837	2.53859	-14787.3	0.403459	1.30553	K0.00Na0.39Ca0.61Al1.61Si2.39O8	52.7753	0	30.1899	0	0	0	0	0	12.5926	4.41875	0.0234	0	0
2000	1080	1.01842	2.41665	-14100.3	0.384771	1.24402	K0.00Na0.40Ca0.60Al1.60Si2.40O8	52.9749	0	30.0553	0	0	0	0	0	12.4349	4.51039	0.0245299	0	0
2000	1075	0.972551	2.30471	-13469.5	0.367611	1.18755	K0.00Na0.40Ca0.59Al1.59Si2.41O8	53.1756	0	29.9198	0	0	0	0	0	12.2764	4.60254	0.0257045	0	0
2000	1070	0.930606	2.20232	-12892.5	0.351919	1.1359	K0.00Na0.41Ca0.59Al1.59Si2.41O8	53.3774	0	29.7836	0	0	0	0	0	12.1169	4.69519	0.026926	0	0
2000	1065	0.892336	2.10887	-12366.2	0.337603	1.08877	K0.00Na0.42Ca0.58Al1.58Si2.42O8	53.5803	0	29.6466	0	0	0	0	0	11.9565	4.78832	0.0281969	0	0
2000	1060	0.857601	2.024	-11888.5	0.324613	1.04599	K0.00Na0.43Ca0.57Al1.57Si2.43O8	53.7844	0	29.5089	0	0	0	0	0	11.7953	4.88193	0.0295202	0	0
2000	1055	0.826379	1.94762	-11459.2	0.312941	1.00752	K0.00Na0.44Ca0.56Al1.56Si2.44O8	53.9896	0	29.3704	0	0	0	0	0	11.6331	4.97604	0.0308992	0	0
2000	1050	0.79887	1.88017	-11081.1	0.302666	0.973606	K0.00Na0.44Ca0.55Al1.55Si2.45O8	54.196	0	29.231	0	0	0	0	0	11.47	5.07068	0.0323381	0	0
2000	1045	0.776232	1.82433	-10770.4	0.294229	0.945652	K0.00Na0.45Ca0.55Al1.55Si2.45O8	54.4039	0	29.0906	0	0	0	0	0	11.3057	5.16596	0.0338429	0	0
2000	1040	0.768939	1.80465	-10672.5	0.291604	0.936406	K0.00Na0.46Ca0.54Al1.54Si2.46O8	54.6148	0	28.9482	0	0	0	0	0	11.1389	5.26261	0.0354306	0	0
2000	1035	0.823234	1.92941	-11429.5	0.312355	1.00215	K0.00Na0.47Ca0.53Al1.53Si2.47O8	54.837	0	28.7982	0	0	0	0	0	10.9633	5.36435	0.0371652	0	0
2000	1030	0.823229	1.92672	-11432.7	0.312516	1.00176	K0.00Na0.48Ca0.52Al1.52Si2.48O8	55.0634	0	28.6453	0	0	0	0	0	10.7843	5.46801	0.0389995	0	0
2000	1025	0.786771	1.8388	-10929.6	0.298831	0.957031	K0.00Na0.49Ca0.51Al1.51Si2.49O8	55.2886	0	28.4931	0	0	0	0	0	10.6063	5.57108	0.0408978	0	0
2000	1020	0.752118	1.7553	-10451.4	0.285815	0.920261	K0.00Na0.49Ca0.50Al1.50Si2.50O8	55.5124	0	28.3419	0	0	0	0	0	10.4293	5.67345	0.0428607	0	0
2000	1015	0.720174	1.67831	-10010.4	0.273814	0.880957	K0.00Na0.50Ca0.49Al1.49Si2.51O8	55.7347	0	28.1918	0	0	0	0	0	10.2536	5.77509	0.0448902	0	0
2000	1010	0.690567	1.60695	-9601.77	0.262688	0.844529	K0.00Na0.51Ca0.49Al1.49Si2.51O8	55.9554	0	28.0426	0	0	0	0	0	10.079	5.87596	0.0469883	0	0
2000	1005	0.66304	1.5406	-9221.8	0.252341	0.810662	K0.00Na0.52Ca0.48Al1.48Si2.52O8	56.1745	0	27.8946	0	0	0	0	0	9.90574	5.97603	0.0491567	0	0
2000	1000	0.637375	1.47873	-8867.51	0.242692	0.779086	K0.00Na0.53Ca0.47Al1.47Si2.53O8	56.3919	0	27.7476	0	0	0	0	0	9.73381	6.07527	0.0513976	0	0
2000	995	0.611406	1.41633	-8508.77	0.232916	0.747154	K0.00Na0.54Ca0.46Al1.46Si2.54O8	56.6089	0	27.6009	0	0	0	0	0	9.56215	6.17429	0.053718	0	0
2000	990	0.586846	1.35735	-8169.42	0.223668	0.716958	K0.00Na0.55Ca0.45Al1.45Si2.55O8	56.8257	0	27.4543	0	0	0	0	0	9.3906	6.27319	0.0561219	0	0
2000	985	0.564435	1.30349	-7859.81	0.21523	0.689405	K0.00Na0.55Ca0.44Al1.44Si2.56O8	57.042	0	27.3081	0	0	0	0	0	9.21948	6.37177	0.0586109	0	0
2000	980	0.543597	1.2534	-7571.91	0.207382	0.663784	K0.00Na0.56Ca0.43Al1.43Si2.57O8	57.2576	0	27.1623	0	0	0	0	0	9.04891	6.46998	0.0611877	0	0
2000	975	0.52417	1.20669	-7303.51	0.200066	0.6399	K0.00Na0.57Ca0.43Al1.43Si2.57O8	57.4724	0	27.0171	0	0	0	0	0	8.87897	6.56775	0.063855	0	0
2000	970	0.506016	1.16303	-7052.69	0.193227	0.617582	K0.00Na0.58Ca0.42Al1.42Si2.58O8	57.6862	0	26.8724	0	0	0	0	0	8.70975	6.66503	0.0666156	0	0
2000	965	0.489013	1.12213	-6817.75	0.186821	0.596678	K0.00Na0.59Ca0.41Al1.41Si2.59O8	57.8989	0	26.7285	0	0	0	0	0	8.54134	6.76177	0.0694721	0	0
2000	960	0.473051	1.08373	-6597.21	0.180807	0.577056	K0.00Na0.59Ca0.40Al1.40Si2.60O8	58.1106	0	26.5853	0	0	0	0	0	8.37382	6.85793	0.0724274	0	0
2000	955	0.463965	1.06115	-6472.46	0.177414	0.565828	K0.00Na0.60Ca0.39Al1.39Si2.61O8	58.3187	0	26.4444	0	0	0	0	0	8.209	6.95245	0.0754429	0	0
2000	950	0.475434	1.08553	-6634.5	0.181876	0.579659	K0.00Na0.61Ca0.39Al1.39Si2.61O8	58.5165	0	26.3105	0	0	0	0	0	8.05238	7.04222	0.0783882	0	0
2000	945	0.459685	1.04777	-6416.73	0.175924	0.560309	K0.00Na0.62Ca0.38Al1.38Si2.62O8	58.7127	0	26.1776	0	0	0	0	0	7.89701	7.13119	0.0814252	0	0
2000	940	0.444957	1.01243	-6213.07	0.170357	0.542213	K0.00Na0.62Ca0.37Al1.37Si2.63O8	58.9072	0	26.046	0	0	0	0	0	7.74299	7.21931	0.0845548	0	0
2000	935	0.430954	0.97885	-6019.42	0.165062	0.52501	K0.00Na0.63Ca0.36Al1.36Si2.64O8	59.0999	0	25.9154	0	0	0	0	0	7.59035	7.30655	0.0877799	0	0
2000	930	0.417621	0.946881	-5835.01	0.160019	0.508634	K0.01Na0.64Ca0.36Al1.36Si2.64O8	59.2908	0	25.7861	0	0	0	0	0	7.4391	7.3929	0.0911037	0	0
2000	925	0.404909	0.916409	-5659.16	0.155209	0.493023	K0.01Na0.65Ca0.35Al1.35Si2.65O8	59.4799	0	25.658	0	0	0	0	0	7.28929	7.47834	0.0945293	0	0
2000	920	0.39277	0.887322	-5491.23	0.150614	0.478119	K0.01Na0.65Ca0.34Al1.34Si2.66O8	59.6671	0	25.5311	0	0	0	0	0	7.14092	7.56286	0.0980599	0	0
2000	915	0.381164	0.859521	-5330.65	0.146219	0.463873	K0.01Na0.66Ca0.33Al1.33Si2.67O8	59.8524	0	25.4055	0	0	0	0	0	6.99403	7.64644	0.101699	0	0
2000	910	0.370052	0.832913	-5176.87	0.142009	0.450236	K0.01Na0.67Ca0.33Al1.33Si2.67O8	60.0358	0	25.2811	0	0	0	0	0	6.84864	7.72906	0.105451	0	0
2000	905	0.359398	0.807415	-5029.42	0.137971	0.437166	K0.01Na0.67Ca0.32Al1.32Si2.68O8	60.2172	0	25.158	0	0	0	0	0	6.70478	7.81071	0.109318	0	0
2000	900	0.349171	0.782951	-4887.84	0.134093	0.424623	K0.01Na0.68Ca0.31Al1.31Si2.69O8	60.3966	0	25.0363	0	0	0	0	0	6.56246	7.89136	0.113305	0	0
Title:	R-magma	-	residual	from	MZ-magma	at	T	=	1145	C
Phase	Masses:
Pressure	Temperature	mass	liquid_0	olivine_0	orthopyroxene_0	clinopyroxene_0	clinopyroxene_1	feldspar_0	spinel_0
2000	1400	100.006	100.006	0	0	0	0	0	0
2000	1400	100.006	100.006	0	0	0	0	0	0
2000	1395	100.006	100.006	0	0	0	0	0	0
2000	1390	100.006	100.006	0	0	0	0	0	0
2000	1385	100.006	100.006	0	0	0	0	0	0
2000	1380	100.006	100.006	0	0	0	0	0	0
2000	1375	100.006	100.006	0	0	0	0	0	0
2000	1370	100.006	100.006	0	0	0	0	0	0
2000	1365	100.006	100.006	0	0	0	0	0	0
2000	1360	100.006	100.006	0	0	0	0	0	0
2000	1355	100.006	100.006	0	0	0	0	0	0
2000	1350	100.007	100.007	0	0	0	0	0	0
2000	1345	100.007	100.007	0	0	0	0	0	0
2000	1340	100.007	100.007	0	0	0	0	0	0
2000	1335	100.007	100.007	0	0	0	0	0	0
2000	1330	100.007	100.007	0	0	0	0	0	0
2000	1325	100.007	100.007	0	0	0	0	0	0
2000	1320	100.007	100.007	0	0	0	0	0	0
2000	1315	100.008	100.008	0	0	0	0	0	0
2000	1310	100.008	100.008	0	0	0	0	0	0
2000	1305	100.008	100.008	0	0	0	0	0	0
2000	1300	100.008	100.008	0	0	0	0	0	0
2000	1295	100.008	100.008	0	0	0	0	0	0
2000	1290	100.008	100.008	0	0	0	0	0	0
2000	1285	100.008	100.008	0	0	0	0	0	0
2000	1280	100.009	100.009	0	0	0	0	0	0
2000	1275	100.009	100.009	0	0	0	0	0	0
2000	1270	100.009	100.009	0	0	0	0	0	0
2000	1265	100.009	100.009	0	0	0	0	0	0
2000	1260	100.009	100.009	0	0	0	0	0	0
2000	1255	100.01	100.01	0	0	0	0	0	0
2000	1250	100.01	100.01	0	0	0	0	0	0
2000	1245	100.01	100.01	0	0	0	0	0	0
2000	1240	100.01	100.01	0	0	0	0	0	0
2000	1235	100.011	100.011	0	0	0	0	0	0
2000	1230	100.011	100.011	0	0	0	0	0	0
2000	1225	100.011	100.011	0	0	0	0	0	0
2000	1220	100.011	100.011	0	0	0	0	0	0
2000	1215	100.012	100.012	0	0	0	0	0	0
2000	1210	100.012	100.012	0	0	0	0	0	0
2000	1205	100.012	100.012	0	0	0	0	0	0
2000	1200	100.012	100.012	0	0	0	0	0	0
2000	1195	100.013	100.013	0	0	0	0	0	0
2000	1190	100.013	100.013	0	0	0	0	0	0
2000	1185	100.013	100.013	0	0	0	0	0	0
2000	1180	100.013	100.013	0	0	0	0	0	0
2000	1175	100.014	100.014	0	0	0	0	0	0
2000	1170	100.014	100.014	0	0	0	0	0	0
2000	1165	100.014	100.014	0	0	0	0	0	0
2000	1160	100.014	97.9352	0	0	2.07908	0	0	0
2000	1155	97.9361	95.6065	0	0	1.93598	0	0.393564	0
2000	1150	95.6075	91.7159	0.340083	0	1.45466	0	2.0968	0
2000	1145	91.7178	88.0736	0.39066	0	1.2172	0	2.03627	0
2000	1140	88.0755	84.717	0.35859	0	1.10203	0	1.89795	0
2000	1135	84.7189	81.6112	0.329396	0	1.00272	0	1.77561	0
2000	1130	81.6134	78.4465	0	0.638501	0.723494	0	1.80493	0
2000	1125	78.4487	75.5228	0	0.596826	0.642609	0	1.68647	0
2000	1120	75.5249	72.6673	0	0	0.241957	0.969261	1.64638	0
2000	1115	72.6695	70.0782	0	0	0.28902	0.808264	1.49397	0
2000	1110	70.0805	67.6697	0	0	0.253458	0.753334	1.404	0
2000	1105	67.672	65.4229	0	0	0.222522	0.70357	1.32303	0
2000	1100	65.4252	63.3214	0	0	0.195572	0.65832	1.24988	0
2000	1095	63.3238	61.3512	0	0	0.17207	0.617034	1.18355	0
2000	1090	61.3536	59.4996	0	0	0.151563	0.579243	1.12318	0
2000	1085	59.5022	57.7478	0	0	0.136742	0.54367	1.06837	0.005545
2000	1080	57.7515	56.091	0	0	0.121909	0.51146	1.01842	0.008692
2000	1075	56.0947	54.5226	0	0	0.108217	0.481896	0.972551	0.009455
2000	1070	54.5264	53.0343	0	0	0.096358	0.45451	0.930606	0.010639
2000	1065	53.0381	51.6182	0	0	0.08611	0.42908	0.892336	0.012405
2000	1060	51.6221	50.2669	0	0	0.077244	0.405423	0.857601	0.014942
2000	1055	50.2709	48.9731	0	0	0.069525	0.383389	0.826379	0.018487
2000	1050	48.9773	47.7294	0	0	0.062716	0.362856	0.79887	0.023502
2000	1045	47.7338	46.5254	0	0	0.056683	0.343722	0.776232	0.031688
2000	1040	46.5304	45.3262	0	0	0.052298	0.325863	0.768939	0.05714
2000	1035	45.3338	43.9851	0	0	0.053423	0.308157	0.823234	0.163829
2000	1030	43.9937	42.6347	0	0	0.04556	0.289449	0.823229	0.200784
2000	1025	42.643	41.3628	0	0	0.034333	0.271977	0.786771	0.187106
2000	1020	41.371	40.1646	0	0	0.024867	0.255903	0.752118	0.173534
2000	1015	40.1726	39.0329	0	0	0.016984	0.241076	0.720174	0.161456
2000	1010	39.0407	37.9616	0	0	0.010454	0.22734	0.690567	0.150664
2000	1005	37.9693	36.9456	0	0	0.005066	0.214581	0.66304	0.140985
2000	1000	36.9531	35.9801	0	0	0.202701	0.00064	0.637375	0.132277
2000	995	35.9871	35.0621	0	0	0.18917	0	0.611406	0.124455
2000	990	35.0684	34.188	0	0	0.17615	0	0.586846	0.117392
2000	985	34.1942	33.3541	0	0	0.164662	0	0.564435	0.11099
2000	980	33.3602	32.5573	0	0	0.154126	0	0.543597	0.105184
2000	975	32.5633	31.7948	0	0	0.144443	0	0.52417	0.099914
2000	970	31.8007	31.064	0	0	0.135525	0	0.506016	0.095126
2000	965	31.0699	30.3628	0	0	0.127294	0	0.489013	0.090777
2000	960	30.3686	29.6891	0	0	0.11968	0	0.473051	0.08683
2000	955	29.6947	29.0388	0.020747	0	0.089529	0	0.463965	0.081678
2000	950	29.0446	28.3915	0.107219	0	0	0	0.475434	0.070453
2000	945	28.3963	27.7672	0.10261	0	0	0	0.459685	0.066721
2000	940	27.7719	27.1647	0.09903	0	0	0	0.444957	0.063178
2000	935	27.1693	26.5829	0.095608	0	0	0	0.430954	0.059865
2000	930	26.5874	26.0207	0.092326	0	0	0	0.417621	0.056765
2000	925	26.0251	25.4772	0.089168	0	0	0	0.404909	0.053862
2000	920	25.4815	24.9515	0.086122	0	0	0	0.39277	0.051141
2000	915	24.9557	24.4428	0.083173	0	0	0	0.381164	0.048589
2000	910	24.447	23.9505	0.080314	0	0	0	0.370052	0.046194
2000	905	23.9546	23.4737	0.077534	0	0	0	0.359398	0.043944
2000	900	23.4778	23.012	0.074828	0	0	0	0.349171	0.041829
Title:	R-magma	-	residual	from	MZ-magma	at	T	=	1145	C
Phase	Volumes:
Pressure	Temperature	mass	V	liquid_0	olivine_0	orthopyroxene_0	clinopyroxene_0	clinopyroxene_1	feldspar_0	spinel_0
2000	1400	100.006	40.0185	40.0185	0	0	0	0	0	0
2000	1400	100.006	40.0185	40.0185	0	0	0	0	0	0
2000	1395	100.006	40.0002	40.0002	0	0	0	0	0	0
2000	1390	100.006	39.9819	39.9819	0	0	0	0	0	0
2000	1385	100.006	39.9637	39.9637	0	0	0	0	0	0
2000	1380	100.006	39.9454	39.9454	0	0	0	0	0	0
2000	1375	100.006	39.9272	39.9272	0	0	0	0	0	0
2000	1370	100.006	39.9089	39.9089	0	0	0	0	0	0
2000	1365	100.006	39.8907	39.8907	0	0	0	0	0	0
2000	1360	100.006	39.8725	39.8725	0	0	0	0	0	0
2000	1355	100.006	39.8542	39.8542	0	0	0	0	0	0
2000	1350	100.007	39.836	39.836	0	0	0	0	0	0
2000	1345	100.007	39.8178	39.8178	0	0	0	0	0	0
2000	1340	100.007	39.7996	39.7996	0	0	0	0	0	0
2000	1335	100.007	39.7815	39.7815	0	0	0	0	0	0
2000	1330	100.007	39.7633	39.7633	0	0	0	0	0	0
2000	1325	100.007	39.7451	39.7451	0	0	0	0	0	0
2000	1320	100.007	39.727	39.727	0	0	0	0	0	0
2000	1315	100.008	39.7088	39.7088	0	0	0	0	0	0
2000	1310	100.008	39.6907	39.6907	0	0	0	0	0	0
2000	1305	100.008	39.6726	39.6726	0	0	0	0	0	0
2000	1300	100.008	39.6545	39.6545	0	0	0	0	0	0
2000	1295	100.008	39.6364	39.6364	0	0	0	0	0	0
2000	1290	100.008	39.6183	39.6183	0	0	0	0	0	0
2000	1285	100.008	39.6002	39.6002	0	0	0	0	0	0
2000	1280	100.009	39.5821	39.5821	0	0	0	0	0	0
2000	1275	100.009	39.5641	39.5641	0	0	0	0	0	0
2000	1270	100.009	39.546	39.546	0	0	0	0	0	0
2000	1265	100.009	39.528	39.528	0	0	0	0	0	0
2000	1260	100.009	39.5099	39.5099	0	0	0	0	0	0
2000	1255	100.01	39.4919	39.4919	0	0	0	0	0	0
2000	1250	100.01	39.4739	39.4739	0	0	0	0	0	0
2000	1245	100.01	39.4559	39.4559	0	0	0	0	0	0
2000	1240	100.01	39.4379	39.4379	0	0	0	0	0	0
2000	1235	100.011	39.42	39.42	0	0	0	0	0	0
2000	1230	100.011	39.402	39.402	0	0	0	0	0	0
2000	1225	100.011	39.3841	39.3841	0	0	0	0	0	0
2000	1220	100.011	39.3661	39.3661	0	0	0	0	0	0
2000	1215	100.012	39.3482	39.3482	0	0	0	0	0	0
2000	1210	100.012	39.3303	39.3303	0	0	0	0	0	0
2000	1205	100.012	39.3124	39.3124	0	0	0	0	0	0
2000	1200	100.012	39.2945	39.2945	0	0	0	0	0	0
2000	1195	100.013	39.2767	39.2767	0	0	0	0	0	0
2000	1190	100.013	39.2588	39.2588	0	0	0	0	0	0
2000	1185	100.013	39.241	39.241	0	0	0	0	0	0
2000	1180	100.013	39.2231	39.2231	0	0	0	0	0	0
2000	1175	100.014	39.2053	39.2053	0	0	0	0	0	0
2000	1170	100.014	39.1875	39.1875	0	0	0	0	0	0
2000	1165	100.014	39.1697	39.1697	0	0	0	0	0	0
2000	1160	100.014	39.0478	38.4035	0	0	0.644365	0	0	0
2000	1155	97.9361	38.284	37.5369	0	0	0.599402	0	0.147672	0
2000	1150	95.6075	37.4112	36.0716	0.102473	0	0.449901	0	0.787162	0
2000	1145	91.7178	35.9582	34.7	0.117404	0	0.376049	0	0.764824	0
2000	1140	88.0755	34.5954	33.4346	0.107479	0	0.340087	0	0.713234	0
2000	1135	84.7189	33.3377	32.2626	0.09846	0	0.309077	0	0.667606	0
2000	1130	81.6134	32.1561	31.0588	0	0.195623	0.222771	0	0.678921	0
2000	1125	78.4487	30.9604	29.9455	0	0.182569	0.197653	0	0.634636	0
2000	1120	75.5249	29.8512	28.8614	0	0	0.074349	0.295677	0.619807	0
2000	1115	72.6695	28.7748	27.8772	0	0	0.088719	0.246199	0.562671	0
2000	1110	70.0805	27.7965	26.9606	0	0	0.077722	0.229124	0.529018	0
2000	1105	67.672	26.8852	26.1046	0	0	0.068163	0.213663	0.498731	0
2000	1100	65.4252	26.0339	25.3031	0	0	0.059844	0.199613	0.471366	0
2000	1095	63.3238	25.2366	24.5507	0	0	0.052595	0.186802	0.44655	0
2000	1090	61.3536	24.4881	23.8428	0	0	0.046276	0.175082	0.423964	0
2000	1085	59.5022	23.7835	23.1731	0	0	0.041704	0.164065	0.403459	0.001224
2000	1080	57.7515	23.1172	22.5393	0	0	0.037138	0.154093	0.384771	0.001909
2000	1075	56.0947	22.4863	21.9387	0	0	0.032928	0.144944	0.367611	0.002067
2000	1070	54.5264	21.8884	21.3684	0	0	0.029285	0.136476	0.351919	0.002316
2000	1065	53.0381	21.3204	20.8254	0	0	0.026139	0.128619	0.337603	0.002689
2000	1060	51.6221	20.7797	20.3071	0	0	0.023419	0.121316	0.324613	0.003228
2000	1055	50.2709	20.2634	19.8109	0	0	0.021052	0.11452	0.312941	0.003983
2000	1050	48.9773	19.7691	19.3343	0	0	0.018966	0.108193	0.302666	0.005052
2000	1045	47.7338	19.2942	18.8738	0	0	0.017119	0.102303	0.294229	0.006801
2000	1040	46.5304	18.8353	18.4188	0	0	0.015776	0.096818	0.291604	0.012245
2000	1035	45.3338	18.3816	17.9267	0	0	0.016103	0.091424	0.312355	0.035036
2000	1030	43.9937	17.8912	17.4364	0	0	0.013726	0.085762	0.312516	0.042836
2000	1025	42.643	17.4028	16.9734	0	0	0.010338	0.080479	0.298831	0.039824
2000	1020	41.371	16.9416	16.5358	0	0	0.007483	0.075622	0.285815	0.03685
2000	1015	40.1726	16.5055	16.1213	0	0	0.005108	0.071145	0.273814	0.034208
2000	1010	39.0407	16.0924	15.7278	0	0	0.003142	0.066999	0.262688	0.031852
2000	1005	37.9693	15.7002	15.3534	0	0	0.001522	0.063151	0.252341	0.029742
2000	1000	36.9531	15.3271	14.9968	0	0	0.059571	0.000192	0.242692	0.027847
2000	995	35.9871	14.9713	14.6568	0	0	0.055515	0	0.232916	0.026146
2000	990	35.0684	14.6321	14.3322	0	0	0.051618	0	0.223668	0.024613
2000	985	34.1942	14.3084	14.0218	0	0	0.048179	0	0.21523	0.023226
2000	980	33.3602	13.9989	13.7245	0	0	0.045027	0	0.207382	0.021969
2000	975	32.5633	13.7023	13.4393	0	0	0.042133	0	0.200066	0.02083
2000	970	31.8007	13.4179	13.1654	0	0	0.039469	0	0.193227	0.019796
2000	965	31.0699	13.1446	12.9019	0	0	0.037012	0	0.186821	0.018857
2000	960	30.3686	12.8818	12.6482	0	0	0.034741	0	0.180807	0.018007
2000	955	29.6947	12.6291	12.4034	0.005443	0	0.025946	0	0.177414	0.01691
2000	950	29.0446	12.3861	12.1616	0.028026	0	0	0	0.181876	0.014564
2000	945	28.3963	12.1444	11.928	0.026721	0	0	0	0.175924	0.013771
2000	940	27.7719	11.911	11.702	0.025695	0	0	0	0.170357	0.013021
2000	935	27.1693	11.6854	11.4833	0.024717	0	0	0	0.165062	0.012321
2000	930	26.5874	11.467	11.2715	0.023783	0	0	0	0.160019	0.011666
2000	925	26.0251	11.2555	11.0664	0.022889	0	0	0	0.155209	0.011055
2000	920	25.4815	11.0507	10.8676	0.022031	0	0	0	0.150614	0.010483
2000	915	24.9557	10.8521	10.6748	0.021205	0	0	0	0.146219	0.009947
2000	910	24.447	10.6596	10.4877	0.020408	0	0	0	0.142009	0.009445
2000	905	23.9546	10.4728	10.3063	0.019638	0	0	0	0.137971	0.008974
2000	900	23.4778	10.2916	10.1301	0.018893	0	0	0	0.134093	0.008532
Title:	R-magma	-	residual	from	MZ-magma	at	T	=	1145	C
Solid	Composition:
Pressure	Temperature	mass	SiO2	TiO2	Al2O3	Fe2O3	Cr2O3	FeO	MnO	MgO	CaO	Na2O	K2O	P2O5	H2O
2000	1400	0	---
2000	1400	0	---
2000	1395	0	---
2000	1390	0	---
2000	1385	0	---
2000	1380	0	---
2000	1375	0	---
2000	1370	0	---
2000	1365	0	---
2000	1360	0	---
2000	1355	0	---
2000	1350	0	---
2000	1345	0	---
2000	1340	0	---
2000	1335	0	---
2000	1330	0	---
2000	1325	0	---
2000	1320	0	---
2000	1315	0	---
2000	1310	0	---
2000	1305	0	---
2000	1300	0	---
2000	1295	0	---
2000	1290	0	---
2000	1285	0	---
2000	1280	0	---
2000	1275	0	---
2000	1270	0	---
2000	1265	0	---
2000	1260	0	---
2000	1255	0	---
2000	1250	0	---
2000	1245	0	---
2000	1240	0	---
2000	1235	0	---
2000	1230	0	---
2000	1225	0	---
2000	1220	0	---
2000	1215	0	---
2000	1210	0	---
2000	1205	0	---
2000	1200	0	---
2000	1195	0	---
2000	1190	0	---
2000	1185	0	---
2000	1180	0	---
2000	1175	0	---
2000	1170	0	---
2000	1165	0	---
2000	1160	2.07908	51.7729	0.179699	4.36218	1.25677	0	6.06021	0	17.3971	18.7648	0.206323	0	0	0
2000	1155	2.32955	51.3818	0.159244	9.12718	1.07118	0	5.17163	0	14.3692	18.0095	0.708417	0.00192025	0	0
2000	1150	3.89155	49.7882	0.0753435	18.8547	0.48742	0	4.00508	0.0340331	10.1426	14.7769	1.82917	0.00647831	0	0
2000	1145	3.64412	49.6083	0.070976	19.2288	0.441469	0	4.25362	0.0440151	10.2326	14.1722	1.94091	0.00710048	0	0
2000	1140	3.35857	49.7035	0.073182	19.3152	0.43914	0	4.36105	0.0461511	10.0612	13.9758	2.01727	0.00758122	0	0
2000	1135	3.10773	49.8077	0.0751326	19.3978	0.436676	0	4.46995	0.0481733	9.88686	13.7746	2.09499	0.00808478	0	0
2000	1130	3.16693	51.7862	0.069357	19.3694	0.456128	0	4.27327	0	9.50986	12.4026	2.12464	0.00850972	0	0
2000	1125	2.92591	51.8602	0.0720543	19.4679	0.454917	0	4.34592	0	9.33685	12.256	2.19714	0.00907259	0	0
2000	1120	2.8576	51.7638	0.0656384	19.4682	0.482627	0	5.27615	0	9.12243	11.5693	2.24231	0.00955275	0	0
2000	1115	2.59125	51.7999	0.0751305	19.4348	0.503241	0	5.23003	0	8.86821	11.7796	2.29899	0.0100606	0	0
2000	1110	2.41079	51.8748	0.0779972	19.5166	0.504358	0	5.30291	0	8.68959	11.6505	2.37244	0.0106875	0	0
2000	1105	2.24912	51.9531	0.0808084	19.597	0.505244	0	5.37441	0	8.51063	11.52	2.44738	0.0113453	0	0
2000	1100	2.10377	52.0348	0.0835638	19.6756	0.505934	0	5.44462	0	8.33155	11.3882	2.52373	0.0120353	0	0
2000	1095	1.97265	52.1198	0.0862658	19.7518	0.506467	0	5.51363	0	8.15257	11.2553	2.60145	0.0127589	0	0
2000	1090	1.85398	52.208	0.0889193	19.8254	0.506881	0	5.58152	0	7.97389	11.1214	2.68044	0.0135174	0	0
2000	1085	1.75433	52.1317	0.107413	19.8627	0.594727	0.0569571	5.71675	0	7.79897	10.9672	2.74929	0.0142504	0	0
2000	1080	1.66048	52.1169	0.124441	19.9098	0.658436	0.0857943	5.83124	0	7.61847	10.8158	2.82411	0.0150449	0	0
2000	1075	1.57212	52.1736	0.137256	19.9635	0.688366	0.0874022	5.91802	0	7.43712	10.6745	2.90442	0.0159014	0	0
2000	1070	1.49211	52.2155	0.155403	20.0094	0.730044	0.0889289	6.01369	0	7.25483	10.5305	2.98487	0.0167933	0	0
2000	1065	1.41993	52.2347	0.181916	20.0458	0.788357	0.0897613	6.12321	0	7.07063	10.3828	3.06506	0.01772	0	0
2000	1060	1.35521	52.2212	0.221013	20.071	0.869114	0.088634	6.253	0	6.88307	10.2298	3.14458	0.0186809	0	0
2000	1055	1.29778	52.1621	0.278401	20.0828	0.979549	0.0835677	6.41151	0	6.69008	10.0693	3.22299	0.0196755	0	0
2000	1050	1.24794	52.0354	0.363164	20.0781	1.13273	0.0721396	6.61296	0	6.48831	9.89709	3.29948	0.0207012	0	0
2000	1045	1.20832	51.7665	0.50036	20.0433	1.37457	0.0521125	6.90111	0	6.26854	9.70089	3.37088	0.0217408	0	0
2000	1040	1.20424	50.7797	0.868246	19.8656	2.06891	0.0230721	7.6039	0	5.96578	9.39197	3.41021	0.0226234	0	0
2000	1035	1.34864	47.0374	2.05368	19.1383	4.56013	0.00177067	9.85155	0	5.35459	8.66171	3.31816	0.0226863	0	0
2000	1030	1.35902	45.8249	2.40246	18.9321	5.54496	0	10.6059	0	5.01759	8.29653	3.35194	0.023624	0	0
2000	1025	1.28019	46.0854	2.30161	19.0261	5.59803	0	10.5136	0	4.84369	8.14537	3.46109	0.0251348	0	0
2000	1020	1.20642	46.3842	2.1914	19.1206	5.62539	0	10.3972	0	4.68021	8.00236	3.57194	0.0267206	0	0
2000	1015	1.13969	46.6756	2.08526	19.2064	5.65686	0	10.2828	0	4.52183	7.86087	3.68204	0.0283663	0	0
2000	1010	1.07902	46.9592	1.983	19.2835	5.69254	0	10.1707	0	4.36852	7.7212	3.79121	0.0300721	0	0
2000	1005	1.02367	47.2353	1.8844	19.3522	5.73233	0	10.0611	0	4.22007	7.58341	3.89937	0.0318392	0	0
2000	1000	0.972994	47.504	1.78923	19.4129	5.77618	0	9.95382	0	4.07626	7.44754	4.00646	0.0336688	0	0
2000	995	0.925031	47.7442	1.70189	19.4423	5.83837	0	9.84346	0	3.93792	7.34941	4.10698	0.0355053	0	0
2000	990	0.880387	47.974	1.61802	19.4657	5.90894	0	9.73277	0	3.80087	7.25518	4.20705	0.0374095	0	0
2000	985	0.840088	48.2051	1.53449	19.481	5.97808	0	9.62624	0	3.67213	7.1576	4.30602	0.0393793	0	0
2000	980	0.802908	48.4314	1.45288	19.4927	6.05103	0	9.52206	0	3.54647	7.05715	4.40484	0.0414263	0	0
2000	975	0.768527	48.6526	1.37316	19.5008	6.12814	0	9.4204	0	3.42382	6.95411	4.50339	0.0435521	0	0
2000	970	0.736667	48.8681	1.2953	19.5052	6.20983	0	9.32144	0	3.30409	6.84871	4.60153	0.0457582	0	0
2000	965	0.707084	49.0773	1.21928	19.5058	6.29667	0	9.22537	0	3.18717	6.74119	4.69914	0.0480463	0	0
2000	960	0.679562	49.2796	1.14507	19.5025	6.3893	0	9.13236	0	3.07295	6.63172	4.79608	0.0504176	0	0
2000	955	0.655919	49.1494	1.04977	19.5724	6.29873	0	9.46716	0.0892534	2.95651	6.42844	4.93497	0.0533646	0	0
2000	950	0.653106	48.0952	0.858638	19.5866	5.3817	0	11.4872	0.473954	3.02404	5.90918	5.12644	0.0570633	0	0
2000	945	0.629016	48.3471	0.801471	19.5517	5.37601	0	11.4585	0.481524	2.89474	5.81794	5.21148	0.0595056	0	0
2000	940	0.607165	48.5862	0.744868	19.4956	5.35516	0	11.4681	0.491874	2.78474	5.7209	5.29062	0.0619655	0	0
2000	935	0.586427	48.8234	0.690897	19.44	5.33241	0	11.4766	0.501933	2.67657	5.62417	5.36944	0.0645078	0	0
2000	930	0.566712	49.0589	0.639534	19.3853	5.30797	0	11.4834	0.511658	2.57026	5.52782	5.44797	0.0671361	0	0
2000	925	0.547939	49.2929	0.590751	19.3316	5.28204	0	11.4878	0.521004	2.46584	5.43194	5.52625	0.069854	0	0
2000	920	0.530032	49.5254	0.544511	19.2791	5.25481	0	11.4893	0.529929	2.36338	5.33659	5.60431	0.0726654	0	0
2000	915	0.512926	49.7567	0.500772	19.2279	5.22647	0	11.4872	0.538396	2.26294	5.24185	5.6822	0.0755744	0	0
2000	910	0.496559	49.9868	0.459486	19.1782	5.19719	0	11.481	0.546372	2.16458	5.14777	5.75994	0.0785852	0	0
2000	905	0.480876	50.2161	0.420601	19.1302	5.16712	0	11.4702	0.553827	2.06839	5.0544	5.83758	0.0817022	0	0
2000	900	0.465828	50.4445	0.384057	19.0838	5.13634	0	11.4542	0.560742	1.97446	4.96179	5.91513	0.08493	0	0
Title:	R-magma	-	residual	from	MZ-magma	at	T	=	1145	C
Bulk	Composition:
Pressure	Temperature	mass	SiO2	TiO2	Al2O3	Fe2O3	Cr2O3	FeO	MnO	MgO	CaO	Na2O	K2O	P2O5	H2O
2000	1400	100.006	53.5261	0.414357	16.7678	1.28032	0.00959721	7.15244	0.169759	5.973	8.98194	4.46299	0.0925775	0.023726	1.14538
2000	1400	100.006	53.5261	0.414357	16.7678	1.28032	0.00959721	7.15244	0.169759	5.973	8.98194	4.46299	0.0925775	0.023726	1.14538
2000	1395	100.006	53.526	0.414357	16.7678	1.28108	0.00959721	7.15176	0.169759	5.97299	8.98193	4.46299	0.0925774	0.023726	1.14537
2000	1390	100.006	53.526	0.414357	16.7678	1.28187	0.0095972	7.15104	0.169759	5.97299	8.98193	4.46298	0.0925774	0.023726	1.14537
2000	1385	100.006	53.5259	0.414356	16.7678	1.2827	0.00959719	7.15028	0.169759	5.97298	8.98192	4.46298	0.0925773	0.023726	1.14537
2000	1380	100.006	53.5259	0.414356	16.7678	1.28357	0.00959718	7.14949	0.169759	5.97298	8.98191	4.46298	0.0925772	0.0237259	1.14537
2000	1375	100.006	53.5258	0.414356	16.7678	1.28449	0.00959717	7.14866	0.169759	5.97297	8.9819	4.46297	0.0925771	0.0237259	1.14537
2000	1370	100.006	53.5258	0.414355	16.7678	1.28544	0.00959717	7.1478	0.169758	5.97297	8.98189	4.46297	0.092577	0.0237259	1.14537
2000	1365	100.006	53.5257	0.414355	16.7677	1.28643	0.00959716	7.1469	0.169758	5.97296	8.98188	4.46296	0.0925769	0.0237259	1.14537
2000	1360	100.006	53.5257	0.414355	16.7677	1.28746	0.00959715	7.14596	0.169758	5.97295	8.98188	4.46296	0.0925768	0.0237258	1.14537
2000	1355	100.006	53.5256	0.414354	16.7677	1.28854	0.00959714	7.14498	0.169758	5.97295	8.98187	4.46295	0.0925767	0.0237258	1.14537
2000	1350	100.007	53.5256	0.414354	16.7677	1.28966	0.00959712	7.14397	0.169758	5.97294	8.98186	4.46295	0.0925766	0.0237258	1.14536
2000	1345	100.007	53.5255	0.414353	16.7677	1.29082	0.00959711	7.14291	0.169757	5.97293	8.98185	4.46294	0.0925765	0.0237258	1.14536
2000	1340	100.007	53.5254	0.414353	16.7676	1.29203	0.0095971	7.14182	0.169757	5.97293	8.98183	4.46294	0.0925764	0.0237257	1.14536
2000	1335	100.007	53.5254	0.414352	16.7676	1.29328	0.00959709	7.14068	0.169757	5.97292	8.98182	4.46293	0.0925763	0.0237257	1.14536
2000	1330	100.007	53.5253	0.414352	16.7676	1.29457	0.00959708	7.1395	0.169757	5.97291	8.98181	4.46293	0.0925762	0.0237257	1.14536
2000	1325	100.007	53.5252	0.414351	16.7676	1.29591	0.00959706	7.13829	0.169757	5.9729	8.9818	4.46292	0.0925761	0.0237256	1.14536
2000	1320	100.007	53.5252	0.41435	16.7676	1.2973	0.00959705	7.13703	0.169756	5.97289	8.98179	4.46291	0.0925759	0.0237256	1.14536
2000	1315	100.008	53.5251	0.41435	16.7675	1.29874	0.00959704	7.13572	0.169756	5.97289	8.98177	4.46291	0.0925758	0.0237256	1.14535
2000	1310	100.008	53.525	0.414349	16.7675	1.30022	0.00959702	7.13438	0.169756	5.97288	8.98176	4.4629	0.0925757	0.0237255	1.14535
2000	1305	100.008	53.5249	0.414349	16.7675	1.30175	0.00959701	7.13299	0.169756	5.97287	8.98175	4.46289	0.0925755	0.0237255	1.14535
2000	1300	100.008	53.5248	0.414348	16.7675	1.30333	0.00959699	7.13155	0.169755	5.97286	8.98173	4.46289	0.0925754	0.0237255	1.14535
2000	1295	100.008	53.5247	0.414347	16.7674	1.30496	0.00959698	7.13007	0.169755	5.97285	8.98172	4.46288	0.0925752	0.0237254	1.14535
2000	1290	100.008	53.5247	0.414347	16.7674	1.30664	0.00959696	7.12855	0.169755	5.97284	8.9817	4.46287	0.0925751	0.0237254	1.14534
2000	1285	100.008	53.5246	0.414346	16.7674	1.30837	0.00959694	7.12697	0.169754	5.97283	8.98169	4.46287	0.0925749	0.0237253	1.14534
2000	1280	100.009	53.5245	0.414345	16.7673	1.31015	0.00959693	7.12535	0.169754	5.97282	8.98167	4.46286	0.0925747	0.0237253	1.14534
2000	1275	100.009	53.5244	0.414344	16.7673	1.31199	0.00959691	7.12369	0.169754	5.97281	8.98165	4.46285	0.0925746	0.0237253	1.14534
2000	1270	100.009	53.5243	0.414344	16.7673	1.31388	0.00959689	7.12197	0.169754	5.9728	8.98164	4.46284	0.0925744	0.0237252	1.14534
2000	1265	100.009	53.5242	0.414343	16.7672	1.31582	0.00959687	7.1202	0.169753	5.97278	8.98162	4.46283	0.0925742	0.0237252	1.14533
2000	1260	100.009	53.5241	0.414342	16.7672	1.31782	0.00959685	7.11839	0.169753	5.97277	8.9816	4.46282	0.092574	0.0237251	1.14533
2000	1255	100.01	53.5239	0.414341	16.7672	1.31988	0.00959683	7.11652	0.169753	5.97276	8.98158	4.46281	0.0925738	0.0237251	1.14533
2000	1250	100.01	53.5238	0.41434	16.7671	1.32199	0.00959681	7.1146	0.169752	5.97275	8.98156	4.4628	0.0925736	0.023725	1.14533
2000	1245	100.01	53.5237	0.414339	16.7671	1.32416	0.00959679	7.11263	0.169752	5.97273	8.98154	4.46279	0.0925734	0.023725	1.14532
2000	1240	100.01	53.5236	0.414338	16.7671	1.32639	0.00959677	7.11061	0.169751	5.97272	8.98152	4.46278	0.0925732	0.0237249	1.14532
2000	1235	100.011	53.5235	0.414337	16.767	1.32868	0.00959675	7.10853	0.169751	5.97271	8.9815	4.46277	0.092573	0.0237249	1.14532
2000	1230	100.011	53.5233	0.414336	16.767	1.33104	0.00959673	7.10639	0.169751	5.97269	8.98148	4.46276	0.0925728	0.0237248	1.14532
2000	1225	100.011	53.5232	0.414335	16.7669	1.33345	0.0095967	7.1042	0.16975	5.97268	8.98146	4.46275	0.0925726	0.0237247	1.14531
2000	1220	100.011	53.5231	0.414334	16.7669	1.33592	0.00959668	7.10195	0.16975	5.97266	8.98144	4.46274	0.0925723	0.0237247	1.14531
2000	1215	100.012	53.5229	0.414333	16.7669	1.33846	0.00959665	7.09965	0.169749	5.97265	8.98142	4.46273	0.0925721	0.0237246	1.14531
2000	1210	100.012	53.5228	0.414332	16.7668	1.34106	0.00959663	7.09728	0.169749	5.97263	8.98139	4.46272	0.0925719	0.0237246	1.14531
2000	1205	100.012	53.5227	0.414331	16.7668	1.34373	0.0095966	7.09486	0.169748	5.97262	8.98137	4.46271	0.0925716	0.0237245	1.1453
2000	1200	100.012	53.5225	0.41433	16.7667	1.34647	0.00959658	7.09237	0.169748	5.9726	8.98134	4.46269	0.0925714	0.0237244	1.1453
2000	1195	100.013	53.5224	0.414329	16.7667	1.34927	0.00959655	7.08983	0.169748	5.97258	8.98132	4.46268	0.0925711	0.0237244	1.1453
2000	1190	100.013	53.5222	0.414328	16.7666	1.35215	0.00959652	7.08722	0.169747	5.97257	8.98129	4.46267	0.0925708	0.0237243	1.14529
2000	1185	100.013	53.5221	0.414326	16.7666	1.35509	0.00959649	7.08454	0.169747	5.97255	8.98127	4.46266	0.0925706	0.0237242	1.14529
2000	1180	100.013	53.5219	0.414325	16.7665	1.35811	0.00959647	7.08181	0.169746	5.97253	8.98124	4.46264	0.0925703	0.0237242	1.14529
2000	1175	100.014	53.5217	0.414324	16.7665	1.3612	0.00959644	7.079	0.169745	5.97251	8.98121	4.46263	0.09257	0.0237241	1.14528
2000	1170	100.014	53.5216	0.414323	16.7664	1.36436	0.00959641	7.07613	0.169745	5.97249	8.98118	4.46261	0.0925697	0.023724	1.14528
2000	1165	100.014	53.5214	0.414321	16.7664	1.36759	0.00959637	7.07319	0.169744	5.97247	8.98115	4.4626	0.0925694	0.0237239	1.14527
2000	1160	100.014	53.5215	0.414322	16.7664	1.3661	0.00959639	7.07455	0.169745	5.97248	8.98117	4.46261	0.0925695	0.023724	1.14528
2000	1155	97.9361	53.5586	0.419301	17.0296	1.36694	0.00980003	7.09741	0.173347	5.73008	8.77358	4.55293	0.0945339	0.0242274	1.16958
2000	1150	95.6075	53.6122	0.425635	17.2224	1.36332	0.0100387	7.15407	0.177569	5.5197	8.54881	4.64659	0.0967897	0.0248175	1.19807
2000	1145	91.7178	53.7749	0.440491	17.1532	1.38783	0.0104644	7.29918	0.183659	5.32409	8.28474	4.76608	0.10062	0.02587	1.24887
2000	1140	88.0755	53.9478	0.455773	17.0673	1.41442	0.0108972	7.43662	0.189438	5.12155	8.04134	4.88291	0.104487	0.0269398	1.30052
2000	1135	84.7189	54.1165	0.470933	16.9783	1.44059	0.0113289	7.56991	0.195119	4.9263	7.80628	4.99644	0.108327	0.0280072	1.35205
2000	1130	81.6134	54.2808	0.485994	16.8861	1.46935	0.01176	7.69658	0.200715	4.73798	7.57919	5.10683	0.112141	0.0290729	1.40349
2000	1125	78.4487	54.3819	0.502803	16.7859	1.501	0.0122344	7.84311	0.208812	4.54578	7.38468	5.22713	0.116321	0.0302457	1.46011
2000	1120	75.5249	54.4802	0.519482	16.682	1.52903	0.0127081	7.98989	0.216896	4.36063	7.1962	5.34442	0.120473	0.0314166	1.51664
2000	1115	72.6695	54.5875	0.537318	16.5725	1.55908	0.0132074	8.10664	0.225418	4.1738	7.02454	5.4663	0.124832	0.0326511	1.57623
2000	1110	70.0805	54.691	0.554397	16.4667	1.58736	0.0136953	8.22273	0.233746	4.00064	6.84903	5.5833	0.129072	0.0338573	1.63446
2000	1105	67.672	54.7918	0.571357	16.358	1.61551	0.0141828	8.33616	0.242065	3.83404	6.6783	5.69756	0.133285	0.0350623	1.69264
2000	1100	65.4252	54.8898	0.588208	16.2467	1.64358	0.0146698	8.4471	0.250378	3.67372	6.51219	5.80915	0.137472	0.0362664	1.75076
2000	1095	63.3238	54.985	0.60496	16.1328	1.67158	0.0151566	8.5557	0.258687	3.51943	6.35054	5.91816	0.141635	0.0374699	1.80886
2000	1090	61.3536	55.0775	0.621623	16.0164	1.69955	0.0156434	8.66208	0.266994	3.37094	6.1932	6.02464	0.145773	0.0386731	1.86695
2000	1085	59.5022	55.1672	0.638205	15.8977	1.72943	0.0161301	8.76463	0.275301	3.228	6.04	6.12866	0.149888	0.0398765	1.92504
2000	1080	57.7515	55.2586	0.654386	15.7771	1.7583	0.0152009	8.86298	0.283647	3.0897	5.89058	6.23101	0.153999	0.0410853	1.98339
2000	1075	56.0947	55.3507	0.670145	15.6547	1.78607	0.0134024	8.95781	0.292024	2.9562	5.74506	6.33153	0.158103	0.0422987	2.04197
2000	1070	54.5264	55.4413	0.6856	15.5303	1.81396	0.0115344	9.04968	0.300424	2.82757	5.6032	6.43	0.162192	0.0435154	2.10071
2000	1065	53.0381	55.531	0.700631	15.4041	1.842	0.00959142	9.1382	0.308854	2.7036	5.46486	6.52655	0.166272	0.0447364	2.15966
2000	1060	51.6221	55.6204	0.715041	15.2761	1.87021	0.00758454	9.22278	0.317326	2.58405	5.32987	6.62137	0.170346	0.0459636	2.21889
2000	1055	50.2709	55.7107	0.728532	15.1466	1.89858	0.0055589	9.3026	0.325855	2.46874	5.19807	6.71467	0.174421	0.047199	2.27853
2000	1050	48.9773	55.8031	0.740667	15.0154	1.9272	0.00361116	9.37641	0.334461	2.35747	5.06928	6.80673	0.178507	0.0484456	2.33871
2000	1045	47.7338	55.8997	0.750776	14.8826	1.95667	0.00189948	9.44189	0.343175	2.25006	4.94334	6.89792	0.182617	0.0497077	2.39964
2000	1040	46.5304	56.0044	0.757546	14.7479	1.99367	0.000638029	9.48916	0.35205	2.14628	4.82003	6.98889	0.186776	0.0509932	2.4617
2000	1035	45.3338	56.1372	0.754862	14.6104	2.07048	5.27134e-05	9.46872	0.361343	2.04527	4.69856	7.08291	0.191106	0.0523393	2.52668
2000	1030	43.9937	56.4088	0.715295	14.4697	2.09838	0	9.36337	0.37235	1.94425	4.57695	7.19708	0.196233	0.0539335	2.60365
2000	1025	42.643	56.7386	0.661781	14.3257	2.09139	0	9.23149	0.384143	1.84677	4.45832	7.31835	0.201696	0.0556418	2.68611
2000	1020	41.371	57.0609	0.611304	14.1784	2.08377	0	9.10142	0.395954	1.75453	4.34419	7.43641	0.207121	0.0573526	2.7687
2000	1015	40.1726	57.3741	0.564126	14.0282	2.0766	0	8.97376	0.407767	1.66719	4.23433	7.55114	0.212498	0.0590636	2.8513
2000	1010	39.0407	57.6789	0.520001	13.8752	2.06982	0	8.84823	0.419589	1.58441	4.12849	7.66275	0.217832	0.060776	2.93397
2000	1005	37.9693	57.976	0.478711	13.7198	2.06335	0	8.72457	0.431428	1.50587	4.02645	7.7714	0.223126	0.0624909	3.01675
2000	1000	36.9531	58.266	0.44006	13.5621	2.05714	0	8.60253	0.443292	1.43129	3.92802	7.87726	0.228381	0.0642094	3.09971
2000	995	35.9871	58.5495	0.403872	13.4023	2.05128	0	8.48174	0.455191	1.3603	3.83284	7.98055	0.233602	0.0659329	3.18291
2000	990	35.0684	58.8271	0.36992	13.2416	2.04553	0	8.36211	0.467117	1.29264	3.73981	8.08148	0.238787	0.0676602	3.2663
2000	985	34.1942	59.099	0.338072	13.0799	2.03977	0	8.24361	0.479059	1.22841	3.64904	8.17996	0.24393	0.06939	3.34981
2000	980	33.3602	59.3658	0.308228	12.9174	2.03401	0	8.12594	0.491035	1.16723	3.56044	8.27622	0.249039	0.0711248	3.43355
2000	975	32.5633	59.6277	0.280287	12.7539	2.02821	0	8.00893	0.503052	1.10894	3.474	8.37035	0.254114	0.0728654	3.51758
2000	970	31.8007	59.8852	0.254154	12.5896	2.02235	0	7.89236	0.515115	1.05339	3.38967	8.46245	0.259157	0.0746127	3.60193
2000	965	31.0699	60.1386	0.229742	12.4243	2.01638	0	7.77604	0.527231	1.00042	3.30745	8.55261	0.26417	0.0763677	3.68666
2000	960	30.3686	60.3882	0.20697	12.2582	2.01027	0	7.65976	0.539406	0.94992	3.2273	8.64093	0.269153	0.0781312	3.77179
2000	955	29.6947	60.6347	0.185764	12.0912	1.99909	0	7.54775	0.551649	0.901762	3.14922	8.72752	0.274111	0.0799044	3.85739
2000	950	29.0446	60.8867	0.166504	11.9209	1.96683	0	7.44943	0.562077	0.8564	3.07498	8.81165	0.279043	0.0816928	3.94373
2000	945	28.3963	61.174	0.150838	11.7437	1.95157	0	7.30257	0.564111	0.807072	3.00957	8.89518	0.284105	0.083558	4.03377
2000	940	27.7719	61.4575	0.136348	11.566	1.93549	0	7.15622	0.565993	0.760314	2.94575	8.97738	0.289147	0.0854365	4.12446
2000	935	27.1693	61.7382	0.12299	11.3879	1.91877	0	7.00941	0.567665	0.715596	2.88353	9.05852	0.294178	0.0873314	4.21593
2000	930	26.5874	62.016	0.110698	11.2095	1.9014	0	6.86219	0.569135	0.672863	2.82289	9.13863	0.299198	0.0892429	4.30821
2000	925	26.0251	62.2912	0.0994084	11.0307	1.88339	0	6.71463	0.57041	0.632061	2.76381	9.21773	0.304204	0.091171	4.40129
2000	920	25.4815	62.5637	0.0890617	10.8515	1.86473	0	6.56679	0.571501	0.593139	2.70626	9.29583	0.309195	0.093116	4.49518
2000	915	24.9557	62.8336	0.0795994	10.6718	1.84544	0	6.41877	0.572417	0.556045	2.65023	9.37294	0.314169	0.0950777	4.58988
2000	910	24.447	63.101	0.0709653	10.4916	1.82551	0	6.27065	0.573168	0.520731	2.59569	9.44908	0.319125	0.0970562	4.6854
2000	905	23.9546	63.3658	0.0631055	10.311	1.80496	0	6.12255	0.573766	0.487147	2.54264	9.52425	0.324061	0.0990513	4.78171
2000	900	23.4778	63.6281	0.0559683	10.1298	1.78381	0	5.97457	0.574221	0.455245	2.49105	9.59844	0.328973	0.101063	4.87882
