# Supplementary material for: A 5-km-thick reservoir with > 380,000 km3 of magma within the ancient Earth's crust
Source: Sci Rep. 2022 Sep 19;12:15651. doi: 10.1038/s41598-022-19915-w (PMC9485162; doi:10.1038/s41598-022-19915-w)
Supplement: Supplementary file 12 — Supplementary Information 12. [file 41598_2022_19915_MOESM12_ESM.xlsx]

## Sheet: alphaMELTS_tbl
	SupplTable S2D: B2 magma fractional crystallization at 2 kbar
Title:	B2 composition from Barnes et al. (2010), their table 5.
System	Thermodynamic	Data:
Pressure	Temperature	mass	F	phi	S	H	V	dVdP*10^6	dVdT*10^6	Cp	logfO2(absolute)	logfO2-QFM	rhol	rhos	viscosity	aH2O	chisqr
2000	1600	100.262	1	1	302.786	-1.13654e+06	37.9095	-225.497	2593.67	148.744	-4.759	0	2.64476	0	1.023	0.00640105	0
2000	1600	100.262	1	1	302.786	-1.13654e+06	37.9095	-225.497	2593.67	148.744	-4.759	0	2.64476	0	1.023	0.00640105	0
2000	1590	100.261	1	1	301.989	-1.13803e+06	37.8834	-225.514	2593.59	148.742	-4.829	0	2.64658	0	1.052	0.00639738	0
2000	1580	100.261	1	1	301.188	-1.13951e+06	37.8574	-225.532	2593.5	148.741	-4.899	0	2.6484	0	1.081	0.00639374	0
2000	1570	100.261	1	1	300.383	-1.141e+06	37.8313	-225.55	2593.4	148.739	-4.971	0	2.65022	0	1.11	0.00639015	0
2000	1560	100.261	1	1	299.574	-1.14249e+06	37.8053	-225.568	2593.29	148.738	-5.043	0	2.65204	0	1.139	0.0063866	0
2000	1550	100.261	1	1	298.76	-1.14397e+06	37.7793	-225.587	2593.17	148.736	-5.116	0	2.65386	0	1.168	0.0063831	0
2000	1540	100.261	1	1	297.942	-1.14546e+06	37.7534	-225.606	2593.04	148.735	-5.19	0	2.65569	0	1.198	0.00637965	0
2000	1530	100.261	1	1	297.119	-1.14695e+06	37.7274	-225.625	2592.9	148.734	-5.265	0	2.65751	0	1.229	0.00637626	0
2000	1520	100.261	1	1	296.292	-1.14843e+06	37.7014	-225.645	2592.76	148.733	-5.341	0	2.65934	0	1.259	0.00637293	0
2000	1510	100.261	1	1	295.46	-1.14992e+06	37.6755	-225.666	2592.6	148.732	-5.417	0	2.66117	0	1.29	0.00636966	0
2000	1500	100.261	1	1	294.624	-1.15141e+06	37.6496	-225.686	2592.44	148.731	-5.494	0	2.663	0	1.322	0.00636646	0
2000	1490	100.261	1	1	293.782	-1.1529e+06	37.6237	-225.707	2592.27	148.73	-5.573	0	2.66484	0	1.353	0.00636334	0
2000	1480	100.261	1	1	292.937	-1.15438e+06	37.5978	-225.729	2592.09	148.729	-5.652	0	2.66667	0	1.385	0.00636029	0
2000	1470	100.261	1	1	292.086	-1.15587e+06	37.572	-225.751	2591.9	148.729	-5.732	0	2.66851	0	1.418	0.00635733	0
2000	1460	100.261	1	1	291.231	-1.15736e+06	37.5461	-225.774	2591.7	148.728	-5.813	0	2.67035	0	1.451	0.00635445	0
2000	1450	100.261	1	1	290.37	-1.15885e+06	37.5203	-225.798	2591.5	148.728	-5.894	0	2.67219	0	1.484	0.00635167	0
2000	1440	100.261	1	1	289.505	-1.16034e+06	37.4945	-225.822	2591.28	148.727	-5.977	0	2.67403	0	1.517	0.00634899	0
2000	1430	100.262	1	1	288.635	-1.16183e+06	37.4687	-225.846	2591.06	148.727	-6.061	0	2.67588	0	1.551	0.00634641	0
2000	1420	100.262	1	1	287.759	-1.16332e+06	37.4429	-225.871	2590.83	148.727	-6.146	0	2.67772	0	1.586	0.00634395	0
2000	1410	100.262	1	1	286.879	-1.16481e+06	37.4172	-225.897	2590.6	148.727	-6.232	0	2.67957	0	1.62	0.0063416	0
2000	1400	100.262	1	1	285.993	-1.1663e+06	37.3914	-225.924	2590.36	148.727	-6.318	0	2.68142	0	1.656	0.00633937	0
2000	1390	100.262	1	1	285.102	-1.16779e+06	37.3657	-225.951	2590.1	148.727	-6.406	0	2.68327	0	1.691	0.00633728	0
2000	1380	100.263	1	1	284.205	-1.16928e+06	37.34	-225.98	2589.85	148.727	-6.495	0	2.68512	0	1.727	0.00633532	0
2000	1370	100.263	1	1	283.304	-1.17077e+06	37.3144	-226.009	2589.58	148.727	-6.585	0	2.68698	0	1.764	0.00633351	0
2000	1360	100.263	1	1	282.397	-1.17226e+06	37.2887	-226.038	2589.31	148.728	-6.676	0	2.68883	0	1.801	0.00633185	0
2000	1350	100.263	1	1	281.484	-1.17375e+06	37.2631	-226.069	2589.03	148.729	-6.768	0	2.69069	0	1.838	0.00633035	0
2000	1340	100.264	1	1	280.565	-1.17524e+06	37.2375	-226.101	2588.75	148.729	-6.862	0	2.69255	0	1.876	0.00632901	0
2000	1330	100.264	1	1	279.641	-1.17673e+06	37.2119	-226.133	2588.46	148.73	-6.956	0	2.69441	0	1.914	0.00632786	0
2000	1320	100.264	1	1	278.712	-1.17823e+06	37.1864	-226.167	2588.16	148.731	-7.052	0	2.69627	0	1.953	0.00632689	0
2000	1310	100.265	1	1	277.776	-1.17972e+06	37.1608	-226.202	2587.86	148.732	-7.149	0	2.69813	0	1.992	0.00632612	0
2000	1300	100.265	1	1	276.835	-1.18121e+06	37.1353	-226.238	2587.55	148.734	-7.247	0	2.69999	0	2.032	0.00632555	0
2000	1290	100.266	1	1	275.887	-1.18271e+06	37.1099	-226.275	2587.24	148.735	-7.346	0	2.70186	0	2.072	0.0063252	0
2000	1280	100.266	1	1	274.934	-1.1842e+06	37.0844	-226.313	2586.92	148.737	-7.447	0	2.70373	0	2.113	0.00632508	0
2000	1270	100.267	1	1	273.974	-1.1857e+06	37.059	-226.352	2586.59	148.738	-7.549	0	2.7056	0	2.154	0.0063252	0
2000	1260	100.267	0.999884	0.999928	273.006	-1.1872e+06	37.0333	-226.38	2585.78	148.734	-7.652	0	2.70737	4.37096	2.197	0.00632695	0
2000	1250	100.268	0.999672	0.999796	272.03	-1.1887e+06	37.0073	-226.399	2584.57	148.726	-7.757	0	2.70908	4.36056	2.241	0.00633007	0
2000	1240	100.269	0.999454	0.99966	271.047	-1.19021e+06	36.9814	-226.419	2583.35	148.718	-7.863	0	2.71078	4.34936	2.285	0.00633348	0
2000	1230	100.27	0.99923	0.999518	270.058	-1.19172e+06	36.9556	-226.44	2582.12	148.71	-7.97	0	2.71248	4.33727	2.329	0.00633721	0
2000	1220	100.271	0.998996	0.99937	269.062	-1.19323e+06	36.9297	-226.462	2580.86	148.701	-8.079	0	2.71417	4.3242	2.375	0.00634129	0
2000	1210	100.272	0.99875	0.999212	268.06	-1.19474e+06	36.9039	-226.484	2579.57	148.693	-8.19	0	2.71585	4.31004	2.421	0.00634576	0
2000	1200	100.273	0.980601	0.98082	266.664	-1.19681e+06	36.8536	-223.224	2555.36	144.619	-8.302	0	2.72023	2.752	2.448	0.00664284	0
2000	1190	100.267	0.840476	0.848871	262.452	-1.20289e+06	36.4106	-201.194	2377.96	140.65	-8.415	0	2.72655	2.90675	2.487	0.00895984	0
2000	1180	100.262	0.724893	0.738746	258.775	-1.20817e+06	36.0201	-183.314	2232.65	137.326	-8.53	0	2.73131	2.9311	2.533	0.0118721	0
2000	1170	100.258	0.631559	0.648621	255.628	-1.21266e+06	35.6965	-168.835	2115.05	134.652	-8.646	0	2.73475	2.94501	2.581	0.0153956	0
2000	1160	100.256	0.553965	0.572912	252.866	-1.21658e+06	35.4234	-156.72	2016.65	132.446	-8.765	0	2.73661	2.95576	2.632	0.0196683	0
2000	1150	100.254	0.487764	0.507876	250.381	-1.2201e+06	35.187	-146.347	1931.77	130.572	-8.885	0	2.73634	2.96561	2.687	0.0248664	0
2000	1140	100.253	0.430029	0.450952	248.099	-1.22332e+06	34.9783	-137.304	1856.42	128.941	-9.006	0	2.73316	2.97537	2.752	0.0312182	0
2000	1130	100.254	0.378651	0.400277	245.967	-1.22633e+06	34.7915	-129.303	1787.43	127.487	-9.129	0	2.72587	2.98546	2.831	0.0390213	0
2000	1120	100.256	0.3321	0.354495	243.944	-1.22921e+06	34.6232	-122.142	1722.12	126.16	-9.254	0	2.71271	2.9961	2.936	0.0486596	0
2000	1110	100.261	0.289722	0.313001	242.012	-1.23197e+06	34.4729	-115.725	1659.26	124.938	-9.381	0	2.69209	3.00695	3.075	0.0605446	0
2000	1100	100.266	0.252189	0.276312	240.186	-1.23459e+06	34.3429	-110.089	1600.64	123.842	-9.51	0	2.66467	3.01689	3.248	0.0748658	0
2000	1090	100.271	0.2206	0.245294	238.497	-1.23698e+06	34.2347	-105.305	1549.65	122.908	-9.64	0	2.63407	3.02476	3.438	0.0913673	0
2000	1080	100.273	0.194979	0.219888	236.948	-1.23913e+06	34.1459	-101.333	1507.56	122.139	-9.773	0	2.60395	3.03038	3.625	0.109554	0
2000	1070	100.274	0.17438	0.199215	235.519	-1.24106e+06	34.0725	-98.0374	1473.35	121.506	-9.907	0	2.57608	3.03423	3.801	0.128994	0
2000	1060	100.273	0.157685	0.182249	234.182	-1.24284e+06	34.0105	-95.2727	1445.34	120.979	-10.044	0	2.55091	3.03687	3.962	0.149387	0
2000	1050	100.271	0.14396	0.168134	232.915	-1.24449e+06	33.9571	-92.9192	1422	120.529	-10.183	0	2.52832	3.0387	4.109	0.170527	0
2000	1040	100.269	0.132503	0.156219	231.699	-1.24605e+06	33.9101	-90.8858	1402.2	120.138	-10.323	0	2.50802	3.04001	4.244	0.192264	0
2000	1030	100.266	0.122803	0.146023	230.523	-1.24754e+06	33.868	-89.1048	1385.08	119.791	-10.466	0	2.48972	3.04099	4.366	0.214484	0
2000	1020	100.263	0.114482	0.137191	229.375	-1.24897e+06	33.8298	-87.55	1376.42	119.692	-10.611	0	2.47314	3.04174	4.478	0.237098	0
2000	1010	100.259	0.107261	0.129457	228.249	-1.25036e+06	33.7946	-86.1344	1363.17	119.41	-10.758	0	2.45806	3.04236	4.581	0.260034	0
2000	1000	100.256	0.100931	0.122617	227.139	-1.25172e+06	33.7619	-84.8527	1351.22	119.148	-10.908	0	2.4443	3.04288	4.676	0.283232	0
2000	990	100.252	0.0953307	0.116516	226.042	-1.25304e+06	33.7312	-83.682	1340.32	118.903	-11.06	0	2.43168	3.04335	4.764	0.306641	0
2000	980	100.248	0.0903369	0.111034	224.955	-1.25435e+06	33.7022	-82.6045	1330.29	118.671	-11.214	0	2.42007	3.04378	4.845	0.330217	0
2000	970	100.245	0.0858512	0.106072	223.874	-1.25563e+06	33.6746	-81.6057	1320.98	118.45	-11.371	0	2.40937	3.0442	4.92	0.35392	0
2000	960	100.241	0.0817954	0.101554	222.798	-1.2569e+06	33.648	-80.6739	1312.27	118.238	-11.531	0	2.39948	3.04462	4.99	0.377719	0
2000	950	100.237	0.0781062	0.097416	221.724	-1.25816e+06	33.6224	-79.7996	1304.08	118.032	-11.693	0	2.39032	3.04504	5.055	0.401585	0
2000	940	100.232	0.0745481	0.093552	220.634	-1.25939e+06	33.6002	-79.0225	1295.26	117.817	-11.857	0	2.3771	3.04562	5.181	0.429987	0
2000	930	100.227	0.0713749	0.090021	219.554	-1.26062e+06	33.5772	-78.2674	1287.4	117.615	-12.025	0	2.36669	3.04615	5.274	0.456759	0
2000	920	100.223	0.0684554	0.086751	218.475	-1.26184e+06	33.5546	-77.5492	1279.95	117.418	-12.195	0	2.35693	3.0467	5.363	0.483773	0
2000	910	100.219	0.0657559	0.083709	217.394	-1.26305e+06	33.5323	-76.8628	1272.87	117.226	-12.368	0	2.34774	3.04728	5.449	0.511032	0
2000	900	100.213	0.0625941	0.080083	216.291	-1.26426e+06	33.5065	-76.0169	1266.35	117.029	-12.544	0	2.3377	3.04773	5.506	0.54528	0
Title:	B2	Barnes	et	al	2010	table	5	n=15
Liquid	Composition:
Pressure	Temperature	mass	SiO2	TiO2	Al2O3	Fe2O3	Cr2O3	FeO	MnO	MgO	CaO	Na2O	K2O	H2O
2000	1600	100.262	50.6575	0.758017	15.659	1.71819	0.0997391	10.9702	0.189504	6.89197	10.6721	1.93494	0.249348	0.199478
2000	1600	100.262	50.6575	0.758017	15.659	1.71819	0.0997391	10.9702	0.189504	6.89197	10.6721	1.93494	0.249348	0.199478
2000	1590	100.261	50.6575	0.758018	15.6591	1.71698	0.0997392	10.9713	0.189504	6.89198	10.6721	1.93494	0.249348	0.199478
2000	1580	100.261	50.6576	0.758019	15.6591	1.7159	0.0997393	10.9723	0.189505	6.89199	10.6721	1.93494	0.249348	0.199479
2000	1570	100.261	50.6576	0.75802	15.6591	1.71496	0.0997394	10.9732	0.189505	6.89199	10.6721	1.93494	0.249349	0.199479
2000	1560	100.261	50.6577	0.75802	15.6591	1.71415	0.0997395	10.9739	0.189505	6.892	10.6721	1.93495	0.249349	0.199479
2000	1550	100.261	50.6577	0.758021	15.6591	1.71349	0.0997396	10.9745	0.189505	6.892	10.6721	1.93495	0.249349	0.199479
2000	1540	100.261	50.6577	0.758021	15.6591	1.71298	0.0997396	10.975	0.189505	6.89201	10.6721	1.93495	0.249349	0.199479
2000	1530	100.261	50.6578	0.758021	15.6591	1.71261	0.0997397	10.9753	0.189505	6.89201	10.6721	1.93495	0.249349	0.199479
2000	1520	100.261	50.6578	0.758021	15.6591	1.71239	0.0997397	10.9755	0.189505	6.89201	10.6721	1.93495	0.249349	0.199479
2000	1510	100.261	50.6578	0.758022	15.6591	1.71233	0.0997397	10.9756	0.189505	6.89201	10.6721	1.93495	0.249349	0.199479
2000	1500	100.261	50.6578	0.758021	15.6591	1.71243	0.0997397	10.9755	0.189505	6.89201	10.6721	1.93495	0.249349	0.199479
2000	1490	100.261	50.6578	0.758021	15.6591	1.71269	0.0997396	10.9752	0.189505	6.89201	10.6721	1.93495	0.249349	0.199479
2000	1480	100.261	50.6577	0.758021	15.6591	1.71312	0.0997396	10.9748	0.189505	6.89201	10.6721	1.93495	0.249349	0.199479
2000	1470	100.261	50.6577	0.75802	15.6591	1.71372	0.0997395	10.9743	0.189505	6.892	10.6721	1.93495	0.249349	0.199479
2000	1460	100.261	50.6577	0.75802	15.6591	1.71449	0.0997395	10.9736	0.189505	6.892	10.6721	1.93495	0.249349	0.199479
2000	1450	100.261	50.6576	0.758019	15.6591	1.71544	0.0997394	10.9727	0.189505	6.89199	10.6721	1.93494	0.249348	0.199479
2000	1440	100.261	50.6576	0.758018	15.6591	1.71658	0.0997393	10.9717	0.189505	6.89198	10.6721	1.93494	0.249348	0.199479
2000	1430	100.262	50.6575	0.758017	15.659	1.7179	0.0997391	10.9705	0.189504	6.89197	10.6721	1.93494	0.249348	0.199478
2000	1420	100.262	50.6574	0.758016	15.659	1.71941	0.099739	10.9691	0.189504	6.89196	10.6721	1.93494	0.249347	0.199478
2000	1410	100.262	50.6573	0.758015	15.659	1.72112	0.0997388	10.9675	0.189504	6.89195	10.6721	1.93493	0.249347	0.199478
2000	1400	100.262	50.6572	0.758013	15.659	1.72303	0.0997386	10.9658	0.189503	6.89194	10.672	1.93493	0.249347	0.199477
2000	1390	100.262	50.6571	0.758012	15.6589	1.72515	0.0997384	10.9639	0.189503	6.89192	10.672	1.93492	0.249346	0.199477
2000	1380	100.263	50.657	0.75801	15.6589	1.72748	0.0997382	10.9617	0.189503	6.89191	10.672	1.93492	0.249345	0.199476
2000	1370	100.263	50.6569	0.758008	15.6589	1.73003	0.0997379	10.9594	0.189502	6.89189	10.672	1.93492	0.249345	0.199476
2000	1360	100.263	50.6567	0.758006	15.6588	1.7328	0.0997376	10.9569	0.189501	6.89187	10.6719	1.93491	0.249344	0.199475
2000	1350	100.263	50.6566	0.758004	15.6588	1.7358	0.0997373	10.9541	0.189501	6.89185	10.6719	1.9349	0.249343	0.199475
2000	1340	100.264	50.6564	0.758001	15.6587	1.73905	0.099737	10.9512	0.1895	6.89183	10.6719	1.9349	0.249343	0.199474
2000	1330	100.264	50.6562	0.757999	15.6587	1.74253	0.0997367	10.948	0.1895	6.8918	10.6718	1.93489	0.249342	0.199473
2000	1320	100.264	50.6561	0.757996	15.6586	1.74627	0.0997363	10.9446	0.189499	6.89178	10.6718	1.93488	0.249341	0.199473
2000	1310	100.265	50.6559	0.757993	15.6585	1.75026	0.0997359	10.941	0.189498	6.89175	10.6717	1.93488	0.24934	0.199472
2000	1300	100.265	50.6556	0.757989	15.6585	1.75452	0.0997355	10.9371	0.189497	6.89172	10.6717	1.93487	0.249339	0.199471
2000	1290	100.266	50.6554	0.757986	15.6584	1.75905	0.099735	10.9329	0.189496	6.89169	10.6716	1.93486	0.249337	0.19947
2000	1280	100.266	50.6552	0.757982	15.6583	1.76386	0.0997345	10.9285	0.189496	6.89166	10.6716	1.93485	0.249336	0.199469
2000	1270	100.267	50.6549	0.757978	15.6582	1.76897	0.099734	10.9239	0.189495	6.89162	10.6715	1.93484	0.249335	0.199468
2000	1260	100.256	50.6604	0.757981	15.6577	1.7742	0.0956123	10.9169	0.189515	6.89109	10.6727	1.93505	0.249362	0.19949
2000	1250	100.235	50.6708	0.757981	15.6565	1.7796	0.0884196	10.9077	0.189554	6.89013	10.6749	1.93545	0.249413	0.199531
2000	1240	100.214	50.6814	0.757969	15.655	1.78531	0.0815322	10.8981	0.189594	6.8891	10.6771	1.93585	0.249465	0.199572
2000	1230	100.193	50.6923	0.757944	15.6531	1.79132	0.0749376	10.888	0.189634	6.88799	10.6794	1.93627	0.249519	0.199615
2000	1220	100.17	50.7036	0.757906	15.6507	1.79765	0.0686245	10.8773	0.189677	6.88677	10.6818	1.9367	0.249575	0.19966
2000	1210	100.147	50.7156	0.757855	15.6477	1.80432	0.0625823	10.866	0.189722	6.88541	10.6843	1.93716	0.249634	0.199707
2000	1200	98.3274	50.7653	0.771599	15.3278	1.83928	0.0587805	11.058	0.193232	7.01052	10.5905	1.92807	0.253548	0.203402
2000	1190	84.272	50.8279	0.892348	14.7522	1.97351	0.0572836	11.9056	0.22546	6.44536	10.3788	2.01256	0.291563	0.237327
2000	1180	72.6794	50.8881	1.02114	14.3608	2.08656	0.0534842	12.7061	0.261422	5.88287	10.0372	2.09454	0.332648	0.275181
2000	1170	63.3191	50.956	1.15307	14.0438	2.18039	0.0487008	13.3988	0.300067	5.37129	9.69514	2.16181	0.375103	0.31586
2000	1160	55.538	51.0445	1.28875	13.7745	2.25684	0.0433539	13.9644	0.342108	4.90593	9.38396	2.21615	0.419431	0.360113
2000	1150	48.9001	51.1733	1.42714	13.5578	2.31495	0.0375169	14.3867	0.388547	4.47932	9.09741	2.26174	0.466517	0.408997
2000	1140	43.1116	51.3726	1.56454	13.4008	2.35238	0.0312277	14.6397	0.440717	4.08451	8.82903	2.30296	0.517608	0.463913
2000	1130	37.9611	51.6923	1.69169	13.3133	2.36455	0.0245866	14.6815	0.500513	3.71413	8.5712	2.3448	0.574592	0.526856
2000	1120	33.2951	52.2108	1.79032	13.3075	2.3439	0.0179761	14.4504	0.570655	3.36029	8.31431	2.39287	0.640262	0.600689
2000	1110	29.0478	53.0112	1.83719	13.3884	2.28207	0.0122505	13.8899	0.654094	3.01917	8.04933	2.4503	0.717579	0.68852
2000	1100	25.286	54.0915	1.82455	13.5355	2.17912	0.00822647	13.0263	0.751403	2.69877	7.77578	2.5111	0.806742	0.79095
2000	1090	22.1198	55.3221	1.77225	13.7055	2.04927	0.00585799	11.9991	0.858959	2.41424	7.5037	2.56144	0.903413	0.904168
2000	1080	19.5512	56.5558	1.70598	13.8641	1.91031	0.00455306	10.9557	0.971809	2.17238	7.24258	2.59168	1.00214	1.02296
2000	1070	17.4858	57.7132	1.63969	13.9987	1.77352	0.00382455	9.97573	1.0866	1.96959	6.99545	2.60041	1.09951	1.14379
2000	1060	15.8116	58.7699	1.5779	14.1088	1.64397	0.003406	9.08491	1.20165	1.79869	6.7614	2.5904	1.19401	1.2649
2000	1050	14.4351	59.7261	1.52119	14.1978	1.5234	0.00316422	8.28466	1.31624	1.65293	6.53849	2.5653	1.28515	1.38552
2000	1040	13.286	60.5902	1.46894	14.2695	1.41203	0.00303131	7.56782	1.43008	1.52695	6.32482	2.52839	1.37286	1.50535
2000	1030	12.3129	61.3723	1.42033	14.3272	1.30951	0.00297095	6.92504	1.54309	1.41671	6.11892	2.48233	1.45726	1.62431
2000	1020	11.4782	62.0818	1.3746	14.3738	1.21523	0.00296283	6.34721	1.65531	1.31918	5.91965	2.42922	1.53852	1.74243
2000	1010	10.7539	62.7272	1.33118	14.4115	1.12852	0.00299533	5.82618	1.7668	1.23208	5.72621	2.37063	1.61685	1.85979
2000	1000	10.1189	63.3155	1.2896	14.442	1.04874	0.00306173	5.35488	1.87768	1.15369	5.53802	2.30781	1.69245	1.97651
2000	990	9.55709	63.8527	1.24952	14.4668	0.975271	0.00315839	4.92726	1.98805	1.08263	5.35462	2.24178	1.76548	2.09269
2000	980	9.05611	64.3439	1.21067	14.4869	0.907546	0.00328369	4.53821	2.09803	1.01785	5.17569	2.17335	1.8361	2.20845
2000	970	8.60611	64.7932	1.17283	14.5034	0.845057	0.00343752	4.18335	2.20773	0.95848	5.00097	2.1032	1.90447	2.32393
2000	960	8.19924	65.2041	1.13586	14.5169	0.787347	0.00362099	3.85895	2.31729	0.903842	4.83028	2.03185	1.97069	2.43925
2000	950	7.82915	65.5796	1.09961	14.5283	0.734004	0.00383629	3.56181	2.42683	0.853362	4.6635	1.95977	2.0349	2.55456
2000	940	7.47209	66.2283	1.05998	14.511	0.676005	0.00412377	3.24092	2.30458	0.798292	4.48982	1.90039	2.10996	2.67663
2000	930	7.15372	66.7064	1.02221	14.504	0.626564	0.00443465	2.97034	2.28131	0.75109	4.32455	1.83538	2.17799	2.79575
2000	920	6.86081	67.1518	0.98466	14.4963	0.581139	0.00479145	2.72383	2.25661	0.7074	4.16306	1.77066	2.24461	2.91511
2000	910	6.58998	67.5667	0.94729	14.4883	0.539365	0.00520222	2.4989	2.23066	0.666849	4.00533	1.70644	2.30997	3.03491
2000	900	6.27277	67.8716	0.883022	14.5152	0.505217	0.00599238	2.3113	2.19086	0.628413	3.84852	1.66316	2.38831	3.18838
Title:	B2	Barnes	et	al	2010	table	5	n=15
liquid_0	thermodynamic	data	and	composition:
Pressure	Temperature	mass	S	H	V	Cp	viscosity	SiO2	TiO2	Al2O3	Fe2O3	Cr2O3	FeO	MnO	MgO	CaO	Na2O	K2O	H2O	Mg#
2000	1600	100.262	302.786	-1.13654e+06	37.9095	148.744	1.023	50.6575	0.758017	15.659	1.71819	0.0997391	10.9702	0.189504	6.89197	10.6721	1.93494	0.249348	0.199478	52.7
2000	1600	100.262	302.786	-1.13654e+06	37.9095	148.744	1.023	50.6575	0.758017	15.659	1.71819	0.0997391	10.9702	0.189504	6.89197	10.6721	1.93494	0.249348	0.199478	52.7
2000	1590	100.261	301.989	-1.13803e+06	37.8834	148.742	1.052	50.6575	0.758018	15.6591	1.71698	0.0997392	10.9713	0.189504	6.89198	10.6721	1.93494	0.249348	0.199478	52.7
2000	1580	100.261	301.188	-1.13951e+06	37.8574	148.741	1.081	50.6576	0.758019	15.6591	1.7159	0.0997393	10.9723	0.189505	6.89199	10.6721	1.93494	0.249348	0.199479	52.7
2000	1570	100.261	300.383	-1.141e+06	37.8313	148.739	1.11	50.6576	0.75802	15.6591	1.71496	0.0997394	10.9732	0.189505	6.89199	10.6721	1.93494	0.249349	0.199479	52.7
2000	1560	100.261	299.574	-1.14249e+06	37.8053	148.738	1.139	50.6577	0.75802	15.6591	1.71415	0.0997395	10.9739	0.189505	6.892	10.6721	1.93495	0.249349	0.199479	52.7
2000	1550	100.261	298.76	-1.14397e+06	37.7793	148.736	1.168	50.6577	0.758021	15.6591	1.71349	0.0997396	10.9745	0.189505	6.892	10.6721	1.93495	0.249349	0.199479	52.7
2000	1540	100.261	297.942	-1.14546e+06	37.7534	148.735	1.198	50.6577	0.758021	15.6591	1.71298	0.0997396	10.975	0.189505	6.89201	10.6721	1.93495	0.249349	0.199479	52.7
2000	1530	100.261	297.119	-1.14695e+06	37.7274	148.734	1.229	50.6578	0.758021	15.6591	1.71261	0.0997397	10.9753	0.189505	6.89201	10.6721	1.93495	0.249349	0.199479	52.7
2000	1520	100.261	296.292	-1.14843e+06	37.7014	148.733	1.259	50.6578	0.758021	15.6591	1.71239	0.0997397	10.9755	0.189505	6.89201	10.6721	1.93495	0.249349	0.199479	52.7
2000	1510	100.261	295.46	-1.14992e+06	37.6755	148.732	1.29	50.6578	0.758022	15.6591	1.71233	0.0997397	10.9756	0.189505	6.89201	10.6721	1.93495	0.249349	0.199479	52.7
2000	1500	100.261	294.624	-1.15141e+06	37.6496	148.731	1.322	50.6578	0.758021	15.6591	1.71243	0.0997397	10.9755	0.189505	6.89201	10.6721	1.93495	0.249349	0.199479	52.7
2000	1490	100.261	293.782	-1.1529e+06	37.6237	148.73	1.353	50.6578	0.758021	15.6591	1.71269	0.0997396	10.9752	0.189505	6.89201	10.6721	1.93495	0.249349	0.199479	52.7
2000	1480	100.261	292.937	-1.15438e+06	37.5978	148.729	1.385	50.6577	0.758021	15.6591	1.71312	0.0997396	10.9748	0.189505	6.89201	10.6721	1.93495	0.249349	0.199479	52.7
2000	1470	100.261	292.086	-1.15587e+06	37.572	148.729	1.418	50.6577	0.75802	15.6591	1.71372	0.0997395	10.9743	0.189505	6.892	10.6721	1.93495	0.249349	0.199479	52.7
2000	1460	100.261	291.231	-1.15736e+06	37.5461	148.728	1.451	50.6577	0.75802	15.6591	1.71449	0.0997395	10.9736	0.189505	6.892	10.6721	1.93495	0.249349	0.199479	52.7
2000	1450	100.261	290.37	-1.15885e+06	37.5203	148.728	1.484	50.6576	0.758019	15.6591	1.71544	0.0997394	10.9727	0.189505	6.89199	10.6721	1.93494	0.249348	0.199479	52.7
2000	1440	100.261	289.505	-1.16034e+06	37.4945	148.727	1.517	50.6576	0.758018	15.6591	1.71658	0.0997393	10.9717	0.189505	6.89198	10.6721	1.93494	0.249348	0.199479	52.7
2000	1430	100.262	288.635	-1.16183e+06	37.4687	148.727	1.551	50.6575	0.758017	15.659	1.7179	0.0997391	10.9705	0.189504	6.89197	10.6721	1.93494	0.249348	0.199478	52.7
2000	1420	100.262	287.759	-1.16332e+06	37.4429	148.727	1.586	50.6574	0.758016	15.659	1.71941	0.099739	10.9691	0.189504	6.89196	10.6721	1.93494	0.249347	0.199478	52.7
2000	1410	100.262	286.879	-1.16481e+06	37.4172	148.727	1.62	50.6573	0.758015	15.659	1.72112	0.0997388	10.9675	0.189504	6.89195	10.6721	1.93493	0.249347	0.199478	52.7
2000	1400	100.262	285.993	-1.1663e+06	37.3914	148.727	1.656	50.6572	0.758013	15.659	1.72303	0.0997386	10.9658	0.189503	6.89194	10.672	1.93493	0.249347	0.199477	52.7
2000	1390	100.262	285.102	-1.16779e+06	37.3657	148.727	1.691	50.6571	0.758012	15.6589	1.72515	0.0997384	10.9639	0.189503	6.89192	10.672	1.93492	0.249346	0.199477	52.7
2000	1380	100.263	284.205	-1.16928e+06	37.34	148.727	1.727	50.657	0.75801	15.6589	1.72748	0.0997382	10.9617	0.189503	6.89191	10.672	1.93492	0.249345	0.199476	52.8
2000	1370	100.263	283.304	-1.17077e+06	37.3144	148.727	1.764	50.6569	0.758008	15.6589	1.73003	0.0997379	10.9594	0.189502	6.89189	10.672	1.93492	0.249345	0.199476	52.8
2000	1360	100.263	282.397	-1.17226e+06	37.2887	148.728	1.801	50.6567	0.758006	15.6588	1.7328	0.0997376	10.9569	0.189501	6.89187	10.6719	1.93491	0.249344	0.199475	52.8
2000	1350	100.263	281.484	-1.17375e+06	37.2631	148.729	1.838	50.6566	0.758004	15.6588	1.7358	0.0997373	10.9541	0.189501	6.89185	10.6719	1.9349	0.249343	0.199475	52.8
2000	1340	100.264	280.565	-1.17524e+06	37.2375	148.729	1.876	50.6564	0.758001	15.6587	1.73905	0.099737	10.9512	0.1895	6.89183	10.6719	1.9349	0.249343	0.199474	52.8
2000	1330	100.264	279.641	-1.17673e+06	37.2119	148.73	1.914	50.6562	0.757999	15.6587	1.74253	0.0997367	10.948	0.1895	6.8918	10.6718	1.93489	0.249342	0.199473	52.8
2000	1320	100.264	278.712	-1.17823e+06	37.1864	148.731	1.953	50.6561	0.757996	15.6586	1.74627	0.0997363	10.9446	0.189499	6.89178	10.6718	1.93488	0.249341	0.199473	52.8
2000	1310	100.265	277.776	-1.17972e+06	37.1608	148.732	1.992	50.6559	0.757993	15.6585	1.75026	0.0997359	10.941	0.189498	6.89175	10.6717	1.93488	0.24934	0.199472	52.8
2000	1300	100.265	276.835	-1.18121e+06	37.1353	148.734	2.032	50.6556	0.757989	15.6585	1.75452	0.0997355	10.9371	0.189497	6.89172	10.6717	1.93487	0.249339	0.199471	52.8
2000	1290	100.266	275.887	-1.18271e+06	37.1099	148.735	2.072	50.6554	0.757986	15.6584	1.75905	0.099735	10.9329	0.189496	6.89169	10.6716	1.93486	0.249337	0.19947	52.8
2000	1280	100.266	274.934	-1.1842e+06	37.0844	148.737	2.113	50.6552	0.757982	15.6583	1.76386	0.0997345	10.9285	0.189496	6.89166	10.6716	1.93485	0.249336	0.199469	52.8
2000	1270	100.267	273.974	-1.1857e+06	37.059	148.738	2.154	50.6549	0.757978	15.6582	1.76897	0.099734	10.9239	0.189495	6.89162	10.6715	1.93484	0.249335	0.199468	52.8
2000	1260	100.256	272.98	-1.1871e+06	37.0306	148.722	2.197	50.6604	0.757981	15.6577	1.7742	0.0956123	10.9169	0.189515	6.89109	10.6727	1.93505	0.249362	0.19949	52.9
2000	1250	100.235	271.957	-1.18844e+06	36.9998	148.692	2.241	50.6708	0.757981	15.6565	1.7796	0.0884196	10.9077	0.189554	6.89013	10.6749	1.93545	0.249413	0.199531	52.9
2000	1240	100.214	270.926	-1.18977e+06	36.9688	148.661	2.285	50.6814	0.757969	15.655	1.78531	0.0815322	10.8981	0.189594	6.8891	10.6771	1.93585	0.249465	0.199572	52.9
2000	1230	100.193	269.887	-1.19109e+06	36.9378	148.629	2.329	50.6923	0.757944	15.6531	1.79132	0.0749376	10.888	0.189634	6.88799	10.6794	1.93627	0.249519	0.199615	52.9
2000	1220	100.17	268.84	-1.1924e+06	36.9064	148.596	2.375	50.7036	0.757906	15.6507	1.79765	0.0686245	10.8773	0.189677	6.88677	10.6818	1.9367	0.249575	0.19966	53
2000	1210	100.147	267.782	-1.1937e+06	36.8748	148.561	2.421	50.7156	0.757855	15.6477	1.80432	0.0625823	10.866	0.189722	6.88541	10.6843	1.93716	0.249634	0.199707	53
2000	1200	98.3274	261.941	-1.17088e+06	36.1467	142.249	2.448	50.7653	0.771599	15.3278	1.83928	0.0587805	11.058	0.193232	7.01052	10.5905	1.92807	0.253548	0.203402	53
2000	1190	84.272	223.743	-994433	30.9079	121.088	2.487	50.8279	0.892348	14.7522	1.97351	0.0572836	11.9056	0.22546	6.44536	10.3788	2.01256	0.291563	0.237327	49.1
2000	1180	72.6794	192.36	-850631	26.6097	103.729	2.533	50.8881	1.02114	14.3608	2.08656	0.0534842	12.7061	0.261422	5.88287	10.0372	2.09454	0.332648	0.275181	45.2
2000	1170	63.3191	167.087	-735902	23.1535	89.8171	2.581	50.956	1.15307	14.0438	2.18039	0.0487008	13.3988	0.300067	5.37129	9.69514	2.16181	0.375103	0.31586	41.6
2000	1160	55.538	146.144	-641780	20.2945	78.3478	2.632	51.0445	1.28875	13.7745	2.25684	0.0433539	13.9644	0.342108	4.90593	9.38396	2.21615	0.419431	0.360113	38.5
2000	1150	48.9001	128.349	-562666	17.8706	68.647	2.687	51.1733	1.42714	13.5578	2.31495	0.0375169	14.3867	0.388547	4.47932	9.09741	2.26174	0.466517	0.408997	35.6
2000	1140	43.1116	112.906	-494811	15.7735	60.2607	2.752	51.3726	1.56454	13.4008	2.35238	0.0312277	14.6397	0.440717	4.08451	8.82903	2.30296	0.517608	0.463913	33.2
2000	1130	37.9611	99.2424	-435564	13.9262	52.8629	2.831	51.6923	1.69169	13.3133	2.36455	0.0245866	14.6815	0.500513	3.71413	8.5712	2.3448	0.574592	0.526856	31
2000	1120	33.2951	86.9429	-383024	12.2737	46.2167	2.936	52.2108	1.79032	13.3075	2.3439	0.0179761	14.4504	0.570655	3.36029	8.31431	2.39287	0.640262	0.600689	29.3
2000	1110	29.0478	75.818	-336225	10.7901	40.2124	3.075	53.0112	1.83719	13.3884	2.28207	0.0122505	13.8899	0.654094	3.01917	8.04933	2.4503	0.717579	0.68852	27.9
2000	1100	25.286	66.0116	-295451	9.48937	34.9272	3.248	54.0915	1.82455	13.5355	2.17912	0.00822647	13.0263	0.751403	2.69877	7.77578	2.5111	0.806742	0.79095	27
2000	1090	22.1198	57.7743	-261350	8.39756	30.4985	3.438	55.3221	1.77225	13.7055	2.04927	0.00585799	11.9991	0.858959	2.41424	7.5037	2.56144	0.903413	0.904168	26.4
2000	1080	19.5512	51.0897	-233620	7.50827	26.9168	3.625	56.5558	1.70598	13.8641	1.91031	0.00455306	10.9557	0.971809	2.17238	7.24258	2.59168	1.00214	1.02296	26.1
2000	1070	17.4858	45.7063	-211160	6.78774	24.0427	3.801	57.7132	1.63969	13.9987	1.77352	0.00382455	9.97573	1.0866	1.96959	6.99545	2.60041	1.09951	1.14379	26
2000	1060	15.8116	41.3331	-192784	6.1984	21.7163	3.962	58.7699	1.5779	14.1088	1.64397	0.003406	9.08491	1.20165	1.79869	6.7614	2.5904	1.19401	1.2649	26.1
2000	1050	14.4351	37.7291	-177528	5.70934	19.8054	4.109	59.7261	1.52119	14.1978	1.5234	0.00316422	8.28466	1.31624	1.65293	6.53849	2.5653	1.28515	1.38552	26.2
2000	1040	13.286	34.7135	-164668	5.29739	18.2115	4.244	60.5902	1.46894	14.2695	1.41203	0.00303131	7.56782	1.43008	1.52695	6.32482	2.52839	1.37286	1.50535	26.4
2000	1030	12.3129	32.1541	-153677	4.94551	16.8624	4.366	61.3723	1.42033	14.3272	1.30951	0.00297095	6.92504	1.54309	1.41671	6.11892	2.48233	1.45726	1.62431	26.7
2000	1020	11.4782	29.9536	-144166	4.64116	15.7057	4.478	62.0818	1.3746	14.3738	1.21523	0.00296283	6.34721	1.65531	1.31918	5.91965	2.42922	1.53852	1.74243	27
2000	1010	10.7539	28.0401	-135842	4.37494	14.7022	4.581	62.7272	1.33118	14.4115	1.12852	0.00299533	5.82618	1.7668	1.23208	5.72621	2.37063	1.61685	1.85979	27.4
2000	1000	10.1189	26.3591	-128488	4.13978	13.8228	4.676	63.3155	1.2896	14.442	1.04874	0.00306173	5.35488	1.87768	1.15369	5.53802	2.30781	1.69245	1.97651	27.7
2000	990	9.55709	24.8692	-121932	3.93025	13.0451	4.764	63.8527	1.24952	14.4668	0.975271	0.00315839	4.92726	1.98805	1.08263	5.35462	2.24178	1.76548	2.09269	28.1
2000	980	9.05611	23.5382	-116045	3.74208	12.3517	4.845	64.3439	1.21067	14.4869	0.907546	0.00328369	4.53821	2.09803	1.01785	5.17569	2.17335	1.8361	2.20845	28.5
2000	970	8.60611	22.3407	-110721	3.57193	11.7291	4.92	64.7932	1.17283	14.5034	0.845057	0.00343752	4.18335	2.20773	0.95848	5.00097	2.1032	1.90447	2.32393	29
2000	960	8.19924	21.2563	-105876	3.41709	11.1663	4.99	65.2041	1.13586	14.5169	0.787347	0.00362099	3.85895	2.31729	0.903842	4.83028	2.03185	1.97069	2.43925	29.4
2000	950	7.82915	20.2686	-101442	3.27536	10.6546	5.055	65.5796	1.09961	14.5283	0.734004	0.00383629	3.56181	2.42683	0.853362	4.6635	1.95977	2.0349	2.55456	29.9
2000	940	7.47209	19.319	-97320.2	3.14337	10.1605	5.181	66.2283	1.05998	14.511	0.676005	0.00412377	3.24092	2.30458	0.798292	4.48982	1.90039	2.10996	2.67663	30.5
2000	930	7.15372	18.4694	-93547.8	3.02266	9.72038	5.274	66.7064	1.02221	14.504	0.626564	0.00443465	2.97034	2.28131	0.75109	4.32455	1.83538	2.17799	2.79575	31
2000	920	6.86081	17.6869	-90055.8	2.91091	9.31565	5.363	67.1518	0.98466	14.4963	0.581139	0.00479145	2.72383	2.25661	0.7074	4.16306	1.77066	2.24461	2.91511	31.6
2000	910	6.58998	16.9628	-86807.9	2.80695	8.94164	5.449	67.5667	0.94729	14.4883	0.539365	0.00520222	2.4989	2.23066	0.666849	4.00533	1.70644	2.30997	3.03491	32.2
2000	900	6.27277	16.1384	-82892.4	2.68331	8.5097	5.506	67.8716	0.883022	14.5152	0.505217	0.00599238	2.3113	2.19086	0.628413	3.84852	1.66316	2.38831	3.18838	32.6
clinopyroxene_0	thermodynamic	data	and	composition:
Pressure	Temperature	mass	S	H	V	Cp	structure	formula	SiO2	TiO2	Al2O3	Fe2O3	Cr2O3	FeO	MnO	MgO	CaO	Na2O	K2O	H2O
2000	1190	6.6985	16.0703	-81731.2	2.04909	8.15169	cpx	Na0.01Ca0.31Fe''0.40Mg1.19Fe'''0.03Ti0.00Al0.16Si1.91O6	52.2006	0.08694	3.6116	1.19039	0	13.1483	0	21.8106	7.86736	0.0841905	0	0
2000	1180	11.336	27.0382	-137364	3.45407	13.713	cpx	Na0.01Ca0.32Fe''0.43Mg1.14Fe'''0.04Ti0.00Al0.16Si1.90O6	51.8755	0.101897	3.63814	1.27893	0	13.8668	0	20.919	8.22843	0.0913289	0	0
2000	1170	14.4929	34.3916	-174228	4.39759	17.4461	cpx	Na0.01Ca0.32Fe''0.46Mg1.12Fe'''0.04Ti0.00Al0.16Si1.90O6	51.5903	0.115378	3.64866	1.35626	0	14.7862	0	20.2896	8.11937	0.0942305	0	0
2000	1160	17.1166	40.4117	-204135	5.17215	20.506	cpx	Na0.01Ca0.32Fe''0.49Mg1.09Fe'''0.04Ti0.00Al0.16Si1.90O6	51.3117	0.129189	3.65964	1.43075	0	15.7099	0	19.6956	7.96682	0.0963538	0	0
2000	1150	19.3387	45.4278	-228812	5.81957	23.0603	cpx	Na0.01Ca0.31Fe''0.52Mg1.06Fe'''0.04Ti0.00Al0.16Si1.90O6	51.0397	0.143342	3.67094	1.50195	0	16.6328	0	19.132	7.78152	0.0977866	0	0
2000	1140	21.2491	49.6645	-249448	6.36851	25.2233	cpx	Na0.01Ca0.30Fe''0.55Mg1.04Fe'''0.04Ti0.00Al0.16Si1.90O6	50.7762	0.157675	3.68168	1.56875	0	17.5464	0	18.5977	7.57295	0.0985979	0	0
2000	1130	22.9039	53.2644	-266830	6.83739	27.0684	cpx	Na0.01Ca0.30Fe''0.58Mg1.01Fe'''0.05Ti0.00Al0.16Si1.89O6	50.5262	0.171592	3.68963	1.62894	0	18.4386	0	18.0959	7.35025	0.0988295	0	0
2000	1120	24.3288	56.2969	-281389	7.23548	28.6323	cpx	Na0.01Ca0.29Fe''0.61Mg0.99Fe'''0.05Ti0.01Al0.16Si1.89O6	50.2986	0.183694	3.69035	1.67854	0	19.2925	0	17.6341	7.12366	0.0984879	0	0
2000	1110	25.5206	58.7656	-293250	7.56389	29.9194	cpx	Na0.01Ca0.28Fe''0.63Mg0.97Fe'''0.05Ti0.01Al0.16Si1.89O6	50.1074	0.191906	3.67724	1.71155	0	20.0838	0	17.2261	6.90442	0.0975571	0	0
2000	1100	26.4667	60.6523	-302440	7.82086	30.9229	cpx	Na0.01Ca0.27Fe''0.66Mg0.95Fe'''0.05Ti0.01Al0.16Si1.89O6	49.9654	0.194994	3.64554	1.72256	0	20.7858	0	16.8892	6.70039	0.0960594	0	0
2000	1090	27.1812	62.0003	-309231	8.01191	31.6655	cpx	Na0.01Ca0.26Fe''0.68Mg0.94Fe'''0.05Ti0.01Al0.16Si1.89O6	49.8733	0.193945	3.59752	1.71173	0	21.3881	0	16.6297	6.51162	0.0941116	0	0
2000	1080	27.7105	62.9223	-314163	8.15086	32.2023	cpx	Na0.01Ca0.26Fe''0.70Mg0.93Fe'''0.05Ti0.01Al0.16Si1.89O6	49.8198	0.190695	3.53991	1.68442	0	21.902	0	16.4374	6.33392	0.0918766	0	0
2000	1070	28.1054	63.5372	-317776	8.25231	32.5912	cpx	Na0.01Ca0.25Fe''0.71Mg0.93Fe'''0.05Ti0.01Al0.16Si1.90O6	49.7923	0.186568	3.47839	1.64658	0	22.3473	0	16.2954	6.16391	0.0894881	0	0
2000	1060	28.4057	63.9362	-320474	8.32745	32.8764	cpx	Na0.01Ca0.25Fe''0.73Mg0.92Fe'''0.05Ti0.01Al0.15Si1.90O6	49.7816	0.182176	3.41618	1.6025	0	22.7412	0	16.1894	5.99984	0.0870345	0	0
2000	1050	28.639	64.1828	-322534	8.38409	33.0885	cpx	Na0.01Ca0.24Fe''0.74Mg0.92Fe'''0.04Ti0.01Al0.15Si1.90O6	49.7819	0.177756	3.35486	1.55495	0	23.0963	0	16.1088	5.84086	0.0845707	0	0
2000	1040	28.8245	64.3204	-324145	8.42757	33.2484	cpx	Na0.01Ca0.23Fe''0.75Mg0.91Fe'''0.04Ti0.00Al0.15Si1.90O6	49.7892	0.173392	3.29514	1.50564	0	23.4216	0	16.0464	5.6865	0.0821301	0	0
2000	1030	28.9755	64.3789	-325436	8.4616	33.3707	cpx	Na0.01Ca0.23Fe''0.76Mg0.91Fe'''0.04Ti0.00Al0.15Si1.90O6	49.8012	0.169106	3.23729	1.45566	0	23.7236	0	15.9969	5.53643	0.0797332	0	0
2000	1020	29.1015	64.3794	-326500	8.48878	33.4656	cpx	Na0.01Ca0.22Fe''0.77Mg0.91Fe'''0.04Ti0.00Al0.14Si1.91O6	49.8163	0.1649	3.18138	1.40571	0	24.007	0	15.957	5.3904	0.0773922	0	0
2000	1010	29.2091	64.3372	-327401	8.51102	33.5404	cpx	Na0.01Ca0.22Fe''0.78Mg0.91Fe'''0.04Ti0.00Al0.14Si1.91O6	49.8332	0.160768	3.12736	1.35622	0	24.2752	0	15.9239	5.24819	0.0751126	0	0
2000	1000	29.3035	64.2634	-328188	8.5297	33.6007	cpx	Na0.01Ca0.21Fe''0.79Mg0.91Fe'''0.04Ti0.00Al0.14Si1.91O6	49.8513	0.156702	3.07516	1.3075	0	24.531	0	15.8958	5.1096	0.0728976	0	0
2000	990	29.3886	64.1665	-328897	8.54588	33.6505	cpx	Na0.01Ca0.20Fe''0.79Mg0.91Fe'''0.04Ti0.00Al0.14Si1.91O6	49.8699	0.152695	3.02467	1.25972	0	24.7764	0	15.8714	4.97444	0.0707488	0	0
2000	980	29.4671	64.0528	-329555	8.56036	33.6929	cpx	Na0.01Ca0.20Fe''0.80Mg0.91Fe'''0.04Ti0.00Al0.13Si1.91O6	49.8887	0.148742	2.9758	1.21303	0	25.0132	0	15.8494	4.84255	0.0686662	0	0
2000	970	29.5416	63.9274	-330185	8.57379	33.7304	cpx	Na0.00Ca0.19Fe''0.81Mg0.91Fe'''0.03Ti0.00Al0.13Si1.92O6	49.9073	0.144836	2.92844	1.16749	0	25.2425	0	15.829	4.71377	0.066649	0	0
2000	960	29.6139	63.7944	-330803	8.58668	33.7652	cpx	Na0.00Ca0.19Fe''0.82Mg0.90Fe'''0.03Ti0.00Al0.13Si1.92O6	49.9255	0.140974	2.8825	1.12315	0	25.4657	0	15.8096	4.58794	0.0646957	0	0
2000	950	29.6855	63.6572	-331426	8.59948	33.7988	cpx	Na0.00Ca0.18Fe''0.83Mg0.90Fe'''0.03Ti0.00Al0.13Si1.92O6	49.943	0.13715	2.83789	1.08004	0	25.6836	0	15.7905	4.46495	0.0628048	0	0
2000	940	29.6082	63.1986	-330404	8.56938	33.6633	cpx	Na0.00Ca0.18Fe''0.83Mg0.90Fe'''0.03Ti0.00Al0.13Si1.92O6	49.9658	0.134056	2.78761	1.03383	0	25.8979	0	15.7773	4.34271	0.0607279	0	0
2000	930	29.6132	62.9149	-330306	8.56313	33.6207	cpx	Na0.00Ca0.17Fe''0.84Mg0.90Fe'''0.03Ti0.00Al0.12Si1.92O6	49.985	0.130606	2.74208	0.991197	0	26.107	0	15.7613	4.22406	0.0588448	0	0
2000	920	29.6302	62.6547	-330348	8.56042	33.5913	cpx	Na0.00Ca0.17Fe''0.85Mg0.90Fe'''0.03Ti0.00Al0.12Si1.92O6	50.0029	0.127127	2.698	0.95008	0	26.3124	0	15.7445	4.108	0.0570353	0	0
2000	910	29.6592	62.4175	-330527	8.56121	33.5748	cpx	Na0.00Ca0.16Fe''0.85Mg0.90Fe'''0.03Ti0.00Al0.12Si1.93O6	50.0196	0.123616	2.65531	0.910452	0	26.5147	0	15.7265	3.99444	0.0552958	0	0
2000	900	29.7594	62.3224	-331400	8.5814	33.6319	cpx	Na0.00Ca0.16Fe''0.86Mg0.90Fe'''0.03Ti0.00Al0.12Si1.93O6	50.0214	0.117675	2.6216	0.878195	0	26.739	0	15.6764	3.89198	0.0538294	0	0
spinel_0	thermodynamic	data	and	composition:
Pressure	Temperature	mass	S	H	V	Cp	formula	SiO2	TiO2	Al2O3	Fe2O3	Cr2O3	FeO	MnO	MgO	CaO	Na2O	K2O	H2O
2000	1260	0.011629	0.025738	-92.3182	0.002661	0.012039	Fe''0.50Mg0.52Fe'''0.34Al0.73Cr0.89Ti0.02O4	0	0.689151	19.538	14.4293	35.6272	18.6975	0	11.0189	0	0	0	0
2000	1250	0.032907	0.072817	-263.365	0.007547	0.034149	Fe''0.49Mg0.52Fe'''0.35Al0.75Cr0.86Ti0.02O4	0	0.715875	20.2059	14.7245	34.5587	18.6896	0	11.1054	0	0	0	0
2000	1240	0.0547	0.121024	-441.596	0.012577	0.056913	Fe''0.49Mg0.53Fe'''0.36Al0.78Cr0.83Ti0.02O4	0	0.743015	20.9216	15.0164	33.4425	18.6748	0	11.2017	0	0	0	0
2000	1230	0.077202	0.170802	-629.092	0.0178	0.080556	Fe''0.49Mg0.53Fe'''0.36Al0.80Cr0.80Ti0.02O4	0	0.770341	21.6904	15.3023	32.2762	18.6517	0	11.309	0	0	0	0
2000	1220	0.100647	0.222684	-828.403	0.023275	0.10535	Fe''0.49Mg0.53Fe'''0.37Al0.83Cr0.77Ti0.02O4	0	0.797553	22.5185	15.5786	31.0577	18.6189	0	11.4288	0	0	0	0
2000	1210	0.125319	0.277311	-1042.69	0.029076	0.131627	Fe''0.48Mg0.54Fe'''0.37Al0.86Cr0.73Ti0.02O4	0	0.824255	23.4126	15.8412	29.7847	18.5745	0	11.5628	0	0	0	0
2000	1200	0.145371	0.321017	-1208.25	0.033721	0.152521	Fe''0.49Mg0.53Fe'''0.38Al0.86Cr0.71Ti0.02O4	0	0.899261	23.4328	16.4132	29.0311	18.7072	0	11.5165	0	0	0	0
2000	1190	0.177106	0.386692	-1379.69	0.040261	0.181107	Fe''0.56Mg0.47Fe'''0.45Al0.76Cr0.74Ti0.03O4	0	1.22902	20.1185	18.5766	29.2062	21.0553	0	9.81433	0	0	0	0
2000	1180	0.216354	0.468727	-1602.17	0.048466	0.21692	Fe''0.63Mg0.41Fe'''0.50Al0.69Cr0.73Ti0.04O4	0	1.6519	17.9079	20.605	28.2537	23.1045	0	8.47695	0	0	0	0
2000	1170	0.259016	0.557965	-1838.87	0.057377	0.255593	Fe''0.69Mg0.37Fe'''0.56Al0.63Cr0.70Ti0.05O4	0	2.1868	16.2144	22.5718	26.7022	24.8997	0	7.42509	0	0	0	0
2000	1160	0.307405	0.659314	-2101.93	0.067489	0.299283	Fe''0.74Mg0.33Fe'''0.62Al0.58Cr0.65Ti0.07O4	0	2.8771	14.7452	24.5439	24.6978	26.5612	0	6.57486	0	0	0	0
2000	1150	0.367383	0.785298	-2425.17	0.080065	0.35352	Fe''0.80Mg0.30Fe'''0.68Al0.53Cr0.60Ti0.10O4	0	3.79118	13.349	26.5533	22.2259	28.2071	0	5.87355	0	0	0	0
2000	1140	0.4494	0.958028	-2866.23	0.097329	0.428009	Fe''0.86Mg0.27Fe'''0.74Al0.48Cr0.52Ti0.13O4	0	5.02093	11.9106	28.5693	19.2562	29.9587	0	5.28434	0	0	0	0
2000	1130	0.572348	1.21722	-3529.12	0.123297	0.540252	Fe''0.93Mg0.25Fe'''0.79Al0.42Cr0.43Ti0.17O4	0	6.64443	10.3806	30.434	15.8412	31.9144	0	4.7854	0	0	0	0
2000	1120	0.76418	1.62101	-4569.56	0.163905	0.716135	Fe''1.00Mg0.23Fe'''0.84Al0.37Cr0.34Ti0.23O4	0	8.58865	8.85431	31.8456	12.3027	34.0393	0	4.3695	0	0	0	0
2000	1110	1.04322	2.20596	-6091.44	0.223016	0.97248	Fe''1.07Mg0.21Fe'''0.87Al0.32Cr0.26Ti0.28O4	0	10.5019	7.55742	32.6035	9.24465	36.0568	0	4.03566	0	0	0	0
2000	1100	1.38039	2.90809	-7933.17	0.294373	1.28198	Fe''1.12Mg0.20Fe'''0.88Al0.28Cr0.20Ti0.32O4	0	11.9996	6.62552	32.8533	7.09364	37.6518	0	3.77621	0	0	0	0
2000	1090	1.70673	3.58126	-9711.31	0.363263	1.58055	Fe''1.16Mg0.19Fe'''0.88Al0.25Cr0.16Ti0.35O4	0	13.0149	6.00341	32.8483	5.78322	38.7735	0	3.57666	0	0	0	0
2000	1080	1.97505	4.12758	-11167.3	0.419697	1.82473	Fe''1.19Mg0.18Fe'''0.88Al0.24Cr0.14Ti0.37O4	0	13.6984	5.57459	32.7267	5.01809	39.561	0	3.42128	0	0	0	0
2000	1070	2.17779	4.53318	-12263.1	0.462143	2.00792	Fe''1.21Mg0.18Fe'''0.88Al0.22Cr0.13Ti0.38O4	0	14.1928	5.25637	32.5436	4.56111	40.1492	0	3.2969	0	0	0	0
2000	1060	2.32536	4.82141	-13058.5	0.492869	2.14001	Fe''1.22Mg0.17Fe'''0.88Al0.21Cr0.12Ti0.39O4	0	14.5802	5.00384	32.3255	4.27725	40.6192	0	3.194	0	0	0	0
2000	1050	2.43074	5.02039	-13625.6	0.514655	2.23314	Fe''1.24Mg0.17Fe'''0.87Al0.20Cr0.12Ti0.40O4	0	14.9025	4.79337	32.0884	4.09517	41.0143	0	3.10618	0	0	0	0
2000	1040	2.50467	5.15317	-14023.3	0.529792	2.29731	Fe''1.25Mg0.16Fe'''0.87Al0.20Cr0.11Ti0.41O4	0	15.1814	4.61184	31.8427	3.97647	41.3585	0	3.02917	0	0	0	0
2000	1030	2.55509	5.23675	-14294.7	0.539972	2.3399	Fe''1.26Mg0.16Fe'''0.86Al0.19Cr0.11Ti0.42O4	0	15.4284	4.45147	31.5953	3.89944	41.6653	0	2.96006	0	0	0	0
2000	1020	2.58772	5.28328	-14470.7	0.546407	2.3662	Fe''1.27Mg0.16Fe'''0.85Al0.18Cr0.11Ti0.43O4	0	15.6506	4.30729	31.3508	3.85127	41.9432	0	2.89685	0	0	0	0
2000	1010	2.60662	5.30142	-14573.1	0.54996	2.37998	Fe''1.28Mg0.15Fe'''0.85Al0.18Cr0.11Ti0.43O4	0	15.852	4.17597	31.1123	3.82403	42.1975	0	2.83809	0	0	0	0
2000	1000	2.61469	5.29731	-14617.2	0.551241	2.3839	Fe''1.29Mg0.15Fe'''0.84Al0.17Cr0.11Ti0.44O4	0	16.0354	4.05518	30.8821	3.8127	42.4319	0	2.78275	0	0	0	0
2000	990	2.61399	5.27534	-14614.1	0.550687	2.37987	Fe''1.29Mg0.15Fe'''0.84Al0.17Cr0.11Ti0.44O4	0	16.2025	3.94321	30.6615	3.81402	42.6488	0	2.73006	0	0	0	0
2000	980	2.60601	5.23867	-14571.3	0.54861	2.36925	Fe''1.30Mg0.15Fe'''0.83Al0.16Cr0.11Ti0.45O4	0	16.3545	3.83879	30.4516	3.82587	42.8499	0	2.67943	0	0	0	0
2000	970	2.59179	5.18956	-14494.5	0.54523	2.35301	Fe''1.31Mg0.14Fe'''0.83Al0.16Cr0.11Ti0.45O4	0	16.492	3.74098	30.2532	3.84692	43.0365	0	2.6304	0	0	0	0
2000	960	2.57206	5.12957	-14387.3	0.5407	2.33183	Fe''1.31Mg0.14Fe'''0.82Al0.16Cr0.11Ti0.45O4	0	16.6155	3.64903	30.0672	3.8764	43.2092	0	2.58262	0	0	0	0
2000	950	2.54729	5.05979	-14252.2	0.535122	2.30615	Fe''1.32Mg0.14Fe'''0.82Al0.15Cr0.11Ti0.46O4	0	16.7251	3.56239	29.8942	3.91396	43.3686	0	2.53577	0	0	0	0
2000	940	2.49388	4.93416	-13971.4	0.523631	2.25456	Fe''1.33Mg0.14Fe'''0.81Al0.15Cr0.12Ti0.46O4	0	16.9259	3.46526	29.5155	3.99746	43.5979	0	2.49793	0	0	0	0
2000	930	2.44741	4.82266	-13721.8	0.513565	2.20941	Fe''1.33Mg0.13Fe'''0.80Al0.15Cr0.12Ti0.47O4	0	17.0581	3.38164	29.2597	4.07298	43.7709	0	2.45667	0	0	0	0
2000	920	2.39694	4.70389	-13448.7	0.502666	2.16077	Fe''1.34Mg0.13Fe'''0.80Al0.14Cr0.12Ti0.47O4	0	17.169	3.30386	29.0283	4.15827	43.9251	0	2.41548	0	0	0	0
2000	910	2.34218	4.57737	-13150	0.49087	2.10836	Fe''1.34Mg0.13Fe'''0.79Al0.14Cr0.12Ti0.47O4	0	17.2569	3.23178	28.8229	4.2549	44.0593	0	2.37416	0	0	0	0
2000	900	2.1716	4.22484	-12170.4	0.454512	1.95173	Fe''1.34Mg0.13Fe'''0.80Al0.14Cr0.13Ti0.46O4	0	16.881	3.23655	29.17	4.58759	43.8151	0	2.3097	0	0	0	0
olivine_0	thermodynamic	data	and	composition:
Pressure	Temperature	mass	S	H	V	Cp	formula	SiO2	TiO2	Al2O3	Fe2O3	Cr2O3	FeO	MnO	MgO	CaO	Na2O	K2O	H2O
2000	940	0.163933	0.337581	-1413.32	0.042381	0.168905	(Ca0.00Mg0.33Fe''0.53Mn0.14Co0.00Ni0.00)2SiO4	32.8508	0	0	0	0	41.6963	10.8577	14.3016	0.293539	0	0	0
2000	930	0.243088	0.498159	-2091.12	0.062736	0.24983	(Ca0.00Mg0.32Fe''0.53Mn0.14Co0.00Ni0.00)2SiO4	32.7976	0	0	0	0	41.8234	11.0254	14.0731	0.280466	0	0	0
2000	920	0.314498	0.641358	-2699.62	0.081029	0.322412	(Ca0.00Mg0.32Fe''0.54Mn0.14Co0.00Ni0.00)2SiO4	32.7457	0	0	0	0	41.9506	11.1855	13.8504	0.26775	0	0	0
2000	910	0.379251	0.769615	-3248.69	0.09755	0.38783	(Ca0.00Mg0.31Fe''0.54Mn0.15Co0.00Ni0.00)2SiO4	32.695	0	0	0	0	42.079	11.3382	13.6324	0.255396	0	0	0
2000	900	0.446517	0.901589	-3816.41	0.114657	0.455514	(Ca0.00Mg0.31Fe''0.54Mn0.15Co0.00Ni0.00)2SiO4	32.6458	0	0	0	0	42.3161	11.3715	13.4228	0.24372	0	0	0
feldspar_0	thermodynamic	data	and	composition:
Pressure	Temperature	mass	S	H	V	Cp	formula	SiO2	TiO2	Al2O3	Fe2O3	Cr2O3	FeO	MnO	MgO	CaO	Na2O	K2O	H2O
2000	1200	1.79984	4.40185	-24724	0.673113	2.21785	K0.00Na0.22Ca0.78Al1.78Si2.22O8	48.5491	0	33.0332	0	0	0	0	0	15.9245	2.45478	0.0384812	0
2000	1190	9.11932	22.2514	-125349	3.41334	11.2289	K0.00Na0.23Ca0.77Al1.77Si2.23O8	48.9032	0	32.7927	0	0	0	0	0	15.6434	2.61354	0.0470838	0
2000	1180	14.5968	35.5334	-200765	5.46816	17.9601	K0.00Na0.25Ca0.75Al1.75Si2.25O8	49.2636	0	32.5479	0	0	0	0	0	15.3573	2.77476	0.0564041	0
2000	1170	18.8598	45.7989	-259564	7.07067	23.1877	K0.00Na0.26Ca0.74Al1.74Si2.26O8	49.6027	0	32.3173	0	0	0	0	0	15.088	2.92584	0.0662139	0
2000	1160	22.3134	54.0467	-307295	8.37128	27.4132	K0.00Na0.27Ca0.72Al1.72Si2.28O8	49.9147	0	32.1048	0	0	0	0	0	14.8399	3.06414	0.0764381	0
2000	1150	25.16	60.7782	-346729	9.44506	30.8854	K0.01Na0.28Ca0.71Al1.71Si2.29O8	50.2016	0	31.9092	0	0	0	0	0	14.6116	3.19067	0.0869354	0
2000	1140	27.5367	66.334	-379741	10.3429	33.7749	K0.01Na0.29Ca0.70Al1.70Si2.30O8	50.4649	0	31.7295	0	0	0	0	0	14.4019	3.30623	0.0975101	0
2000	1130	29.5437	70.963	-407703	11.1021	36.2058	K0.01Na0.30Ca0.69Al1.69Si2.31O8	50.7055	0	31.5651	0	0	0	0	0	14.2101	3.41139	0.107903	0
2000	1120	31.2615	74.864	-431716	11.7524	38.2775	K0.01Na0.31Ca0.68Al1.68Si2.32O8	50.9235	0	31.416	0	0	0	0	0	14.0362	3.50644	0.117794	0
2000	1110	32.756	78.1996	-452685	12.3184	40.0715	K0.01Na0.32Ca0.68Al1.68Si2.32O8	51.1188	0	31.2824	0	0	0	0	0	13.8805	3.59142	0.126875	0
2000	1100	34.0704	81.0768	-471202	12.8162	41.6412	K0.01Na0.32Ca0.67Al1.67Si2.33O8	51.2915	0	31.1643	0	0	0	0	0	13.7427	3.66648	0.135035	0
2000	1090	35.2214	83.5386	-487491	13.2519	43.0076	K0.01Na0.33Ca0.66Al1.66Si2.34O8	51.4424	0	31.061	0	0	0	0	0	13.6223	3.73194	0.142433	0
2000	1080	36.2181	85.6102	-501674	13.6289	44.182	K0.01Na0.33Ca0.66Al1.66Si2.34O8	51.573	0	30.9715	0	0	0	0	0	13.518	3.7883	0.149289	0
2000	1070	37.0769	87.334	-513975	13.9533	45.1852	K0.01Na0.34Ca0.65Al1.65Si2.35O8	51.6852	0	30.8944	0	0	0	0	0	13.4282	3.83644	0.155737	0
2000	1060	37.8189	88.7626	-524678	14.2332	46.0429	K0.01Na0.34Ca0.65Al1.65Si2.35O8	51.7816	0	30.8281	0	0	0	0	0	13.351	3.87743	0.161846	0
2000	1050	38.4638	89.946	-534055	14.476	46.78	K0.01Na0.34Ca0.65Al1.65Si2.35O8	51.8646	0	30.7709	0	0	0	0	0	13.2844	3.9124	0.16766	0
2000	1040	39.0288	90.9267	-542339	14.6882	47.4175	K0.01Na0.35Ca0.64Al1.64Si2.36O8	51.9364	0	30.7213	0	0	0	0	0	13.2267	3.94233	0.173212	0
2000	1030	39.5277	91.739	-549720	14.8752	47.9723	K0.01Na0.35Ca0.64Al1.64Si2.36O8	51.9988	0	30.6781	0	0	0	0	0	13.1765	3.96808	0.178531	0
2000	1020	39.9713	92.4095	-556346	15.041	48.6723	K0.01Na0.35Ca0.64Al1.64Si2.36O8	52.0535	0	30.6401	0	0	0	0	0	13.1325	3.99032	0.183644	0
2000	1010	40.3686	92.9598	-562340	15.1889	49.1048	K0.01Na0.35Ca0.64Al1.64Si2.36O8	52.1015	0	30.6066	0	0	0	0	0	13.0936	4.00966	0.188576	0
2000	1000	40.7264	93.4082	-567796	15.3218	49.4876	K0.01Na0.35Ca0.63Al1.63Si2.37O8	52.1442	0	30.5769	0	0	0	0	0	13.0591	4.02656	0.193348	0
2000	990	41.0503	93.7687	-572787	15.4416	49.8276	K0.01Na0.36Ca0.63Al1.63Si2.37O8	52.1821	0	30.5502	0	0	0	0	0	13.0283	4.04138	0.197981	0
2000	980	41.3448	94.0523	-577377	15.5502	50.1304	K0.01Na0.36Ca0.63Al1.63Si2.37O8	52.2161	0	30.5263	0	0	0	0	0	13.0006	4.05444	0.202493	0
2000	970	41.6135	94.2682	-581614	15.649	50.4006	K0.01Na0.36Ca0.63Al1.63Si2.37O8	52.2467	0	30.5047	0	0	0	0	0	12.9757	4.066	0.206903	0
2000	960	41.8594	94.4238	-585539	15.739	50.6418	K0.01Na0.36Ca0.63Al1.63Si2.37O8	52.2744	0	30.4851	0	0	0	0	0	12.953	4.07626	0.211227	0
2000	950	42.0849	94.5253	-589184	15.8211	50.8572	K0.01Na0.36Ca0.63Al1.63Si2.37O8	52.2996	0	30.4672	0	0	0	0	0	12.9324	4.0854	0.21548	0
2000	940	42.3226	94.6435	-593013	15.9074	51.0859	K0.01Na0.36Ca0.63Al1.63Si2.37O8	52.3125	0	30.4579	0	0	0	0	0	12.9216	4.0898	0.218186	0
2000	930	42.5258	94.6778	-596360	15.9807	51.272	K0.01Na0.36Ca0.63Al1.63Si2.37O8	52.3287	0	30.4462	0	0	0	0	0	12.9082	4.09536	0.221496	0
2000	920	42.7107	94.6644	-599456	16.0471	51.4353	K0.01Na0.36Ca0.63Al1.63Si2.37O8	52.3439	0	30.4353	0	0	0	0	0	12.8957	4.10043	0.224771	0
2000	910	42.8788	94.6066	-602319	16.1071	51.5777	K0.01Na0.36Ca0.63Al1.63Si2.37O8	52.3582	0	30.4249	0	0	0	0	0	12.8838	4.10511	0.228023	0
2000	900	43.0677	94.5863	-605479	16.1747	51.7441	K0.01Na0.36Ca0.63Al1.63Si2.37O8	52.3655	0	30.4189	0	0	0	0	0	12.8771	4.1058	0.232626	0
rhm-oxide_0	thermodynamic	data	and	composition:
Pressure	Temperature	mass	S	H	V	Cp	formula	SiO2	TiO2	Al2O3	Fe2O3	Cr2O3	FeO	MnO	MgO	CaO	Na2O	K2O	H2O
2000	900	0.085198	0.159414	-631.345	0.018369	0.07716	Mn0.04Fe''0.80Mg0.08Fe'''0.16Ti0.92O3	0	49.134	0	8.28883	0	38.4518	2.10918	2.01626	0	0	0	0
clinopyroxene_1	thermodynamic	data	and	composition:
Pressure	Temperature	mass	S	H	V	Cp	structure	formula	SiO2	TiO2	Al2O3	Fe2O3	Cr2O3	FeO	MnO	MgO	CaO	Na2O	K2O	H2O
2000	1180	1.43369	3.37399	-17808.8	0.439694	1.70721	cpx	Na0.01Ca0.64Fe''0.29Mg0.94Fe'''0.04Ti0.01Al0.18Si1.89O6	51.1526	0.189499	4.22508	1.56264	0	9.55841	0	17.0649	16.0849	0.161993	0	0
2000	1170	3.32756	7.7924	-41129.9	1.01735	3.94537	cpx	Na0.01Ca0.64Fe''0.31Mg0.91Fe'''0.05Ti0.01Al0.19Si1.88O6	50.8838	0.225354	4.26137	1.67268	0	10.0894	0	16.5034	16.1928	0.171171	0	0
2000	1160	4.98013	11.6042	-61270.1	1.518	5.87935	cpx	Na0.01Ca0.65Fe''0.33Mg0.88Fe'''0.05Ti0.01Al0.19Si1.88O6	50.6091	0.267016	4.30678	1.78512	0	10.577	0	15.9417	16.3329	0.180497	0	0
2000	1150	6.48745	15.0402	-79466.4	1.97165	7.62606	cpx	Na0.01Ca0.66Fe''0.34Mg0.85Fe'''0.05Ti0.01Al0.19Si1.88O6	50.3289	0.315684	4.36076	1.89957	0	11.022	0	15.3859	16.4971	0.189993	0	0
2000	1140	7.90611	18.2365	-96452.7	2.396	9.25457	cpx	Na0.01Ca0.67Fe''0.36Mg0.83Fe'''0.06Ti0.01Al0.19Si1.87O6	50.0453	0.372307	4.42213	2.01473	0	11.4235	0	14.843	16.6794	0.199618	0	0
2000	1130	9.27249	21.28	-112708	2.80249	10.8096	cpx	Na0.02Ca0.68Fe''0.37Mg0.80Fe'''0.06Ti0.01Al0.20Si1.87O6	49.7635	0.436627	4.48782	2.12749	0	11.7799	0	14.322	16.8735	0.209216	0	0
2000	1120	10.6067	24.2196	-128511	3.19766	12.3169	cpx	Na0.02Ca0.69Fe''0.38Mg0.78Fe'''0.06Ti0.01Al0.20Si1.86O6	49.496	0.505216	4.55047	2.23133	0	12.0902	0	13.8369	17.0714	0.218396	0	0
2000	1110	11.8932	27.0232	-143722	3.57753	13.7619	cpx	Na0.02Ca0.70Fe''0.39Mg0.75Fe'''0.07Ti0.02Al0.20Si1.86O6	49.2654	0.570113	4.59754	2.31533	0	12.3539	0	13.4083	17.2629	0.226505	0	0
2000	1100	13.0627	29.5375	-157562	3.92211	15.0686	cpx	Na0.02Ca0.71Fe''0.40Mg0.74Fe'''0.07Ti0.02Al0.21Si1.85O6	49.0936	0.623096	4.61835	2.36873	0	12.5666	0	13.0558	17.4408	0.232975	0	0
2000	1090	14.0417	31.6024	-169195	4.21005	16.156	cpx	Na0.02Ca0.71Fe''0.40Mg0.72Fe'''0.07Ti0.02Al0.21Si1.85O6	48.9825	0.663271	4.61453	2.39006	0	12.7231	0	12.7818	17.6069	0.237825	0	0
2000	1080	14.8186	33.1983	-178502	4.43821	17.0128	cpx	Na0.02Ca0.72Fe''0.41Mg0.71Fe'''0.07Ti0.02Al0.21Si1.85O6	48.9159	0.695537	4.59626	2.38678	0	12.8257	0	12.5709	17.7675	0.241507	0	0
2000	1070	15.4281	34.4083	-185890	4.61695	17.6794	cpx	Na0.02Ca0.73Fe''0.41Mg0.70Fe'''0.07Ti0.02Al0.20Si1.85O6	48.8768	0.724412	4.57229	2.36744	0	12.8833	0	12.4053	17.926	0.244453	0	0
2000	1060	15.9118	35.3288	-191845	4.75861	18.2033	cpx	Na0.02Ca0.73Fe''0.41Mg0.69Fe'''0.07Ti0.02Al0.20Si1.85O6	48.8539	0.752384	4.54748	2.33812	0	12.906	0	12.2715	18.0837	0.246944	0	0
2000	1050	16.3028	36.0364	-196749	4.87298	18.6224	cpx	Na0.02Ca0.74Fe''0.41Mg0.69Fe'''0.07Ti0.02Al0.20Si1.85O6	48.8404	0.780631	4.52415	2.30263	0	12.9021	0	12.1604	18.2405	0.249152	0	0
2000	1040	16.6249	36.5856	-200873	4.96706	18.9636	cpx	Na0.02Ca0.75Fe''0.41Mg0.68Fe'''0.06Ti0.02Al0.20Si1.85O6	48.8323	0.809718	4.50335	2.26335	0	12.8779	0	12.0661	18.3961	0.251182	0	0
2000	1030	16.8947	37.0144	-204408	5.04576	19.2458	cpx	Na0.02Ca0.75Fe''0.41Mg0.68Fe'''0.06Ti0.02Al0.20Si1.85O6	48.827	0.839949	4.48552	2.22178	0	12.8379	0	11.9845	18.5503	0.253104	0	0
2000	1020	17.1239	37.3496	-207486	5.11251	19.4822	cpx	Na0.02Ca0.76Fe''0.41Mg0.67Fe'''0.06Ti0.02Al0.20Si1.85O6	48.8229	0.871523	4.47086	2.17889	0	12.7855	0	11.9127	18.7027	0.254969	0	0
2000	1010	17.321	37.6105	-210202	5.16979	19.6823	cpx	Na0.02Ca0.77Fe''0.40Mg0.67Fe'''0.06Ti0.03Al0.20Si1.85O6	48.8189	0.904602	4.45943	2.13535	0	12.7231	0	11.8486	18.8532	0.256807	0	0
2000	1000	17.4921	37.8113	-212627	5.21943	19.8532	cpx	Na0.02Ca0.77Fe''0.40Mg0.67Fe'''0.06Ti0.03Al0.20Si1.85O6	48.8139	0.939349	4.45128	2.09161	0	12.6526	0	11.7908	19.0019	0.258647	0	0
2000	990	17.642	37.9627	-214813	5.26279	20	cpx	Na0.02Ca0.78Fe''0.40Mg0.66Fe'''0.06Ti0.03Al0.20Si1.85O6	48.8073	0.975938	4.44647	2.048	0	12.5753	0	11.7379	19.1486	0.260512	0	0
2000	980	17.7742	38.0729	-216800	5.30091	20.1268	cpx	Na0.02Ca0.78Fe''0.40Mg0.66Fe'''0.06Ti0.03Al0.20Si1.85O6	48.7985	1.01457	4.44506	2.00477	0	12.4922	0	11.6891	19.2933	0.26242	0	0
2000	970	17.8916	38.1481	-218620	5.33463	20.2368	cpx	Na0.02Ca0.79Fe''0.39Mg0.66Fe'''0.06Ti0.03Al0.20Si1.85O6	48.787	1.05546	4.44716	1.96208	0	12.4042	0	11.6435	19.4363	0.26439	0	0
2000	960	17.9964	38.1936	-220297	5.36459	20.3324	cpx	Na0.02Ca0.80Fe''0.39Mg0.66Fe'''0.05Ti0.03Al0.20Si1.85O6	48.772	1.09889	4.45292	1.9201	0	12.3118	0	11.6003	19.5775	0.266438	0	0
2000	950	18.0904	38.2135	-221854	5.39133	20.4156	cpx	Na0.02Ca0.80Fe''0.39Mg0.65Fe'''0.05Ti0.03Al0.20Si1.85O6	48.7531	1.14515	4.46254	1.87894	0	12.2156	0	11.5592	19.717	0.268579	0	0
2000	940	18.1712	38.2016	-223271	5.41404	20.4836	cpx	Na0.02Ca0.81Fe''0.38Mg0.65Fe'''0.05Ti0.03Al0.20Si1.85O6	48.7228	1.20517	4.47619	1.83414	0	12.1082	0	11.5196	19.8637	0.270252	0	0
2000	930	18.2443	38.1716	-224595	5.43441	20.5427	cpx	Na0.02Ca0.81Fe''0.38Mg0.65Fe'''0.05Ti0.04Al0.20Si1.85O6	48.689	1.26459	4.49549	1.79295	0	12.0001	0	11.4805	20.005	0.272376	0	0
2000	920	18.3099	38.1236	-225834	5.45248	20.593	cpx	Na0.02Ca0.82Fe''0.38Mg0.65Fe'''0.05Ti0.04Al0.20Si1.85O6	48.6482	1.32849	4.52054	1.75328	0	11.8887	0	11.4413	20.1448	0.274693	0	0
2000	910	18.3694	38.0601	-227000	5.46859	20.6359	cpx	Na0.02Ca0.82Fe''0.37Mg0.64Fe'''0.05Ti0.04Al0.20Si1.84O6	48.5993	1.39757	4.55189	1.7152	0	11.7739	0	11.4015	20.2834	0.277221	0	0
2000	900	18.4102	37.9584	-227871	5.47955	20.6585	cpx	Na0.02Ca0.83Fe''0.37Mg0.64Fe'''0.05Ti0.04Al0.20Si1.84O6	48.6039	1.41846	4.55342	1.67661	0	11.7092	0	11.3718	20.3875	0.279074	0	0
Title:	B2	Barnes	et	al	2010	table	5	n=15
Phase	Masses:
Pressure	Temperature	mass	liquid_0	olivine_0	clinopyroxene_0	clinopyroxene_1	feldspar_0	spinel_0	rhm-oxide_0
2000	1600	100.262	100.262	0	0	0	0	0	0
2000	1600	100.262	100.262	0	0	0	0	0	0
2000	1590	100.261	100.261	0	0	0	0	0	0
2000	1580	100.261	100.261	0	0	0	0	0	0
2000	1570	100.261	100.261	0	0	0	0	0	0
2000	1560	100.261	100.261	0	0	0	0	0	0
2000	1550	100.261	100.261	0	0	0	0	0	0
2000	1540	100.261	100.261	0	0	0	0	0	0
2000	1530	100.261	100.261	0	0	0	0	0	0
2000	1520	100.261	100.261	0	0	0	0	0	0
2000	1510	100.261	100.261	0	0	0	0	0	0
2000	1500	100.261	100.261	0	0	0	0	0	0
2000	1490	100.261	100.261	0	0	0	0	0	0
2000	1480	100.261	100.261	0	0	0	0	0	0
2000	1470	100.261	100.261	0	0	0	0	0	0
2000	1460	100.261	100.261	0	0	0	0	0	0
2000	1450	100.261	100.261	0	0	0	0	0	0
2000	1440	100.261	100.261	0	0	0	0	0	0
2000	1430	100.262	100.262	0	0	0	0	0	0
2000	1420	100.262	100.262	0	0	0	0	0	0
2000	1410	100.262	100.262	0	0	0	0	0	0
2000	1400	100.262	100.262	0	0	0	0	0	0
2000	1390	100.262	100.262	0	0	0	0	0	0
2000	1380	100.263	100.263	0	0	0	0	0	0
2000	1370	100.263	100.263	0	0	0	0	0	0
2000	1360	100.263	100.263	0	0	0	0	0	0
2000	1350	100.263	100.263	0	0	0	0	0	0
2000	1340	100.264	100.264	0	0	0	0	0	0
2000	1330	100.264	100.264	0	0	0	0	0	0
2000	1320	100.264	100.264	0	0	0	0	0	0
2000	1310	100.265	100.265	0	0	0	0	0	0
2000	1300	100.265	100.265	0	0	0	0	0	0
2000	1290	100.266	100.266	0	0	0	0	0	0
2000	1280	100.266	100.266	0	0	0	0	0	0
2000	1270	100.267	100.267	0	0	0	0	0	0
2000	1260	100.267	100.256	0	0	0	0	0.011629	0
2000	1250	100.268	100.235	0	0	0	0	0.032907	0
2000	1240	100.269	100.214	0	0	0	0	0.0547	0
2000	1230	100.27	100.193	0	0	0	0	0.077202	0
2000	1220	100.271	100.17	0	0	0	0	0.100647	0
2000	1210	100.272	100.147	0	0	0	0	0.125319	0
2000	1200	100.273	98.3274	0	0	0	1.79984	0.145371	0
2000	1190	100.267	84.272	0	6.6985	0	9.11932	0.177106	0
2000	1180	100.262	72.6794	0	11.336	1.43369	14.5968	0.216354	0
2000	1170	100.258	63.3191	0	14.4929	3.32756	18.8598	0.259016	0
2000	1160	100.256	55.538	0	17.1166	4.98013	22.3134	0.307405	0
2000	1150	100.254	48.9001	0	19.3387	6.48745	25.16	0.367383	0
2000	1140	100.253	43.1116	0	21.2491	7.90611	27.5367	0.4494	0
2000	1130	100.254	37.9611	0	22.9039	9.27249	29.5437	0.572348	0
2000	1120	100.256	33.2951	0	24.3288	10.6067	31.2615	0.76418	0
2000	1110	100.261	29.0478	0	25.5206	11.8932	32.756	1.04322	0
2000	1100	100.266	25.286	0	26.4667	13.0627	34.0704	1.38039	0
2000	1090	100.271	22.1198	0	27.1812	14.0417	35.2214	1.70673	0
2000	1080	100.273	19.5512	0	27.7105	14.8186	36.2181	1.97505	0
2000	1070	100.274	17.4858	0	28.1054	15.4281	37.0769	2.17779	0
2000	1060	100.273	15.8116	0	28.4057	15.9118	37.8189	2.32536	0
2000	1050	100.271	14.4351	0	28.639	16.3028	38.4638	2.43074	0
2000	1040	100.269	13.286	0	28.8245	16.6249	39.0288	2.50467	0
2000	1030	100.266	12.3129	0	28.9755	16.8947	39.5277	2.55509	0
2000	1020	100.263	11.4782	0	29.1015	17.1239	39.9713	2.58772	0
2000	1010	100.259	10.7539	0	29.2091	17.321	40.3686	2.60662	0
2000	1000	100.256	10.1189	0	29.3035	17.4921	40.7264	2.61469	0
2000	990	100.252	9.55709	0	29.3886	17.642	41.0503	2.61399	0
2000	980	100.248	9.05611	0	29.4671	17.7742	41.3448	2.60601	0
2000	970	100.245	8.60611	0	29.5416	17.8916	41.6135	2.59179	0
2000	960	100.241	8.19924	0	29.6139	17.9964	41.8594	2.57206	0
2000	950	100.237	7.82915	0	29.6855	18.0904	42.0849	2.54729	0
2000	940	100.232	7.47209	0.163933	29.6082	18.1712	42.3226	2.49388	0
2000	930	100.227	7.15372	0.243088	29.6132	18.2443	42.5258	2.44741	0
2000	920	100.223	6.86081	0.314498	29.6302	18.3099	42.7107	2.39694	0
2000	910	100.219	6.58998	0.379251	29.6592	18.3694	42.8788	2.34218	0
2000	900	100.213	6.27277	0.446517	29.7594	18.4102	43.0677	2.1716	0.085198
Title:	B2	Barnes	et	al	2010	table	5	n=15
Phase	Volumes:
Pressure	Temperature	mass	V	Temperature	liquid_0	olivine_0	clinopyroxene_0	clinopyroxene_1	feldspar_0	spinel_0	rhm-oxide_0	Sum	Temperature	Melt		Cpx (Pig)	Cpx (Aug)	Pl	Spl
2000	1600	100.262	37.9095	1600	37.9095	0	0	0	0	0	0	37.9095	1600	100
2000	1600	100.262	37.9095	1600	37.9095	0	0	0	0	0	0	37.9095	1600	100
2000	1590	100.261	37.8834	1590	37.8834	0	0	0	0	0	0	37.8834	1590	100
2000	1580	100.261	37.8574	1580	37.8574	0	0	0	0	0	0	37.8574	1580	100
2000	1570	100.261	37.8313	1570	37.8313	0	0	0	0	0	0	37.8313	1570	100
2000	1560	100.261	37.8053	1560	37.8053	0	0	0	0	0	0	37.8053	1560	100
2000	1550	100.261	37.7793	1550	37.7793	0	0	0	0	0	0	37.7793	1550	100
2000	1540	100.261	37.7534	1540	37.7534	0	0	0	0	0	0	37.7534	1540	100
2000	1530	100.261	37.7274	1530	37.7274	0	0	0	0	0	0	37.7274	1530	100
2000	1520	100.261	37.7014	1520	37.7014	0	0	0	0	0	0	37.7014	1520	100
2000	1510	100.261	37.6755	1510	37.6755	0	0	0	0	0	0	37.6755	1510	100
2000	1500	100.261	37.6496	1500	37.6496	0	0	0	0	0	0	37.6496	1500	100
2000	1490	100.261	37.6237	1490	37.6237	0	0	0	0	0	0	37.6237	1490	100
2000	1480	100.261	37.5978	1480	37.5978	0	0	0	0	0	0	37.5978	1480	100
2000	1470	100.261	37.572	1470	37.572	0	0	0	0	0	0	37.572	1470	100
2000	1460	100.261	37.5461	1460	37.5461	0	0	0	0	0	0	37.5461	1460	100
2000	1450	100.261	37.5203	1450	37.5203	0	0	0	0	0	0	37.5203	1450	100
2000	1440	100.261	37.4945	1440	37.4945	0	0	0	0	0	0	37.4945	1440	100
2000	1430	100.262	37.4687	1430	37.4687	0	0	0	0	0	0	37.4687	1430	100
2000	1420	100.262	37.4429	1420	37.4429	0	0	0	0	0	0	37.4429	1420	100
2000	1410	100.262	37.4172	1410	37.4172	0	0	0	0	0	0	37.4172	1410	100
2000	1400	100.262	37.3914	1400	37.3914	0	0	0	0	0	0	37.3914	1400	100
2000	1390	100.262	37.3657	1390	37.3657	0	0	0	0	0	0	37.3657	1390	100
2000	1380	100.263	37.34	1380	37.34	0	0	0	0	0	0	37.34	1380	100
2000	1370	100.263	37.3144	1370	37.3144	0	0	0	0	0	0	37.3144	1370	100
2000	1360	100.263	37.2887	1360	37.2887	0	0	0	0	0	0	37.2887	1360	100
2000	1350	100.263	37.2631	1350	37.2631	0	0	0	0	0	0	37.2631	1350	100
2000	1340	100.264	37.2375	1340	37.2375	0	0	0	0	0	0	37.2375	1340	100
2000	1330	100.264	37.2119	1330	37.2119	0	0	0	0	0	0	37.2119	1330	100
2000	1320	100.264	37.1864	1320	37.1864	0	0	0	0	0	0	37.1864	1320	100
2000	1310	100.265	37.1608	1310	37.1608	0	0	0	0	0	0	37.1608	1310	100
2000	1300	100.265	37.1353	1300	37.1353	0	0	0	0	0	0	37.1353	1300	100
2000	1290	100.266	37.1099	1290	37.1099	0	0	0	0	0	0	37.1099	1290	100
2000	1280	100.266	37.0844	1280	37.0844	0	0	0	0	0	0	37.0844	1280	100
2000	1270	100.267	37.059	1270	37.059	0	0	0	0	0	0	37.059	1270	100					0
2000	1260	100.267	37.0333	1260	37.0306	0	0	0	0	0.002661	0	37.0333	1260	99.9928					0.00718543
2000	1250	100.268	37.0073	1250	36.9998	0	0	0	0	0.007547	0	37.0073	1250	99.9796					0.0203933
2000	1240	100.269	36.9814	1240	36.9688	0	0	0	0	0.012577	0	36.9814	1240	99.966					0.034009
2000	1230	100.27	36.9556	1230	36.9378	0	0	0	0	0.0178	0	36.9556	1230	99.9518					0.048166
2000	1220	100.271	36.9297	1220	36.9064	0	0	0	0	0.023275	0	36.9297	1220	99.937					0.0630251
2000	1210	100.272	36.9039	1210	36.8748	0	0	0	0	0.029076	0	36.9039	1210	99.9212				0	0.0787884
2000	1200	100.273	36.8536	1200	36.1467	0	0	0	0.673113	0.033721	0	36.8536	1200	98.082		0		1.82645	0.0915
2000	1190	100.267	36.4106	1190	30.9079	0	2.04909	0	3.41334	0.040261	0	36.4106	1190	84.8871		5.62772	0	9.37456	0.110575
2000	1180	100.262	36.0201	1180	26.6097	0	3.45407	0.439694	5.46816	0.048466	0	36.0201	1180	73.8746		9.58928	1.22069	15.1809	0.134553
2000	1170	100.258	35.6965	1170	23.1535	0	4.39759	1.01735	7.07067	0.057377	0	35.6965	1170	64.8621		12.3194	2.85001	19.8078	0.160736
2000	1160	100.256	35.4234	1160	20.2945	0	5.17215	1.518	8.37128	0.067489	0	35.4234	1160	57.2912		14.6009	4.28531	23.6321	0.190521
2000	1150	100.254	35.187	1150	17.8706	0	5.81957	1.97165	9.44506	0.080065	0	35.187	1150	50.7876		16.539	5.60336	26.8425	0.227541
2000	1140	100.253	34.9783	1140	15.7735	0	6.36851	2.396	10.3429	0.097329	0	34.9783	1140	45.0952		18.207	6.84997	29.5696	0.278255
2000	1130	100.254	34.7915	1130	13.9262	0	6.83739	2.80249	11.1021	0.123297	0	34.7915	1130	40.0277		19.6525	8.05512	31.9103	0.354389
2000	1120	100.256	34.6232	1120	12.2737	0	7.23548	3.19766	11.7524	0.163905	0	34.6232	1120	35.4495		20.8978	9.2356	33.9437	0.473397
2000	1110	100.261	34.4729	1110	10.7901	0	7.56389	3.57753	12.3184	0.223016	0	34.4729	1110	31.3001		21.9416	10.3778	35.7336	0.646932
2000	1100	100.266	34.3429	1100	9.48937	0	7.82086	3.92211	12.8162	0.294373	0	34.3429	1100	27.6312		22.7729	11.4204	37.3183	0.857158
2000	1090	100.271	34.2347	1090	8.39756	0	8.01191	4.21005	13.2519	0.363263	0	34.2347	1090	24.5294		23.4029	12.2976	38.709	1.0611
2000	1080	100.273	34.1459	1080	7.50827	0	8.15086	4.43821	13.6289	0.419697	0	34.1459	1080	21.9888		23.8707	12.9978	39.9136	1.22913
2000	1070	100.274	34.0725	1070	6.78774	0	8.25231	4.61695	13.9533	0.462143	0	34.0725	1070	19.9215		24.2199	13.5504	40.9519	1.35635
2000	1060	100.273	34.0105	1060	6.1984	0	8.32745	4.75861	14.2332	0.492869	0	34.0105	1060	18.2249		24.4849	13.9916	41.8494	1.44917
2000	1050	100.271	33.9571	1050	5.70934	0	8.38409	4.87298	14.476	0.514655	0	33.9571	1050	16.8134		24.6903	14.3504	42.6303	1.5156
2000	1040	100.269	33.9101	1040	5.29739	0	8.42757	4.96706	14.6882	0.529792	0	33.9101	1040	15.6219		24.8527	14.6478	43.3153	1.56234
2000	1030	100.266	33.868	1030	4.94551	0	8.4616	5.04576	14.8752	0.539972	0	33.868	1030	14.6023		24.984	14.8983	43.921	1.59434
2000	1020	100.263	33.8298	1020	4.64116	0	8.48878	5.11251	15.041	0.546407	0	33.8298	1020	13.7191		25.0926	15.1124	44.4606	1.61516
2000	1010	100.259	33.7946	1010	4.37494	0	8.51102	5.16979	15.1889	0.54996	0	33.7946	1010	12.9457		25.1845	15.2977	44.9448	1.62736
2000	1000	100.256	33.7619	1000	4.13978	0	8.5297	5.21943	15.3218	0.551241	0	33.7619	1000	12.2617		25.2643	15.4595	45.3818	1.63273
2000	990	100.252	33.7312	990	3.93025	0	8.54588	5.26279	15.4416	0.550687	0	33.7312	990	11.6516		25.3352	15.6021	45.7785	1.63257
2000	980	100.248	33.7022	980	3.74208	0	8.56036	5.30091	15.5502	0.54861	0	33.7022	980	11.1034		25.4	15.7287	46.1401	1.62782
2000	970	100.245	33.6746	970	3.57193	0	8.57379	5.33463	15.649	0.54523	0	33.6746	970	10.6072		25.4607	15.8417	46.4712	1.61912
2000	960	100.241	33.648	960	3.41709	0	8.58668	5.36459	15.739	0.5407	0	33.648	960	10.1554		25.5191	15.9433	46.7753	1.60693
2000	950	100.237	33.6224	950	3.27536	0	8.59948	5.39133	15.8211	0.535122	0	33.6224	950	9.74159		25.5766	16.0349	47.0553	1.59156
2000	940	100.232	33.6002	940	3.14337	0.042381	8.56938	5.41404	15.9074	0.523631	0	33.6002	940	9.35523		25.504	16.1131	47.3431	1.55842
2000	930	100.227	33.5772	930	3.02266	0.062736	8.56313	5.43441	15.9807	0.513565	0	33.5772	930	9.00213		25.5028	16.1848	47.5939	1.52951
2000	920	100.223	33.5546	920	2.91091	0.081029	8.56042	5.45248	16.0471	0.502666	0	33.5546	920	8.67515		25.5119	16.2496	47.8238	1.49805
2000	910	100.219	33.5323	910	2.80695	0.09755	8.56121	5.46859	16.1071	0.49087	0	33.5323	910	8.37088		25.5312	16.3084	48.0347	1.46387
2000	900	100.213	33.5065	900	2.68331	0.114657	8.5814	5.47955	16.1747	0.454512	0.018369	33.5065	900	8.00834		25.6112	16.3537	48.2733	1.35649
Title:	B2	Barnes	et	al	2010	table	5	n=15
Solid	Composition:
Pressure	Temperature	mass	SiO2	TiO2	Al2O3	Fe2O3	Cr2O3	FeO	MnO	MgO	CaO	Na2O	K2O	H2O
2000	1600	0	---
2000	1600	0	---
2000	1590	0	---
2000	1580	0	---
2000	1570	0	---
2000	1560	0	---
2000	1550	0	---
2000	1540	0	---
2000	1530	0	---
2000	1520	0	---
2000	1510	0	---
2000	1500	0	---
2000	1490	0	---
2000	1480	0	---
2000	1470	0	---
2000	1460	0	---
2000	1450	0	---
2000	1440	0	---
2000	1430	0	---
2000	1420	0	---
2000	1410	0	---
2000	1400	0	---
2000	1390	0	---
2000	1380	0	---
2000	1370	0	---
2000	1360	0	---
2000	1350	0	---
2000	1340	0	---
2000	1330	0	---
2000	1320	0	---
2000	1310	0	---
2000	1300	0	---
2000	1290	0	---
2000	1280	0	---
2000	1270	0	---
2000	1260	0.011629	-3.80919e-11	0.689151	19.538	14.4293	35.6272	18.6975	0	11.0189	0	0	0	0
2000	1250	0.032907	-2.70811e-11	0.715875	20.2059	14.7245	34.5587	18.6896	0	11.1054	0	0	0	0
2000	1240	0.0547	3.81097e-12	0.743015	20.9216	15.0164	33.4425	18.6748	0	11.2017	0	0	0	0
2000	1230	0.077202	6.07541e-13	0.770341	21.6904	15.3023	32.2762	18.6517	0	11.309	0	0	0	0
2000	1220	0.100647	1.13915e-11	0.797553	22.5185	15.5786	31.0577	18.6189	0	11.4288	0	0	0	0
2000	1210	0.125319	1.58026e-12	0.824255	23.4126	15.8412	29.7847	18.5745	0	11.5628	0	0	0	0
2000	1200	1.94521	44.9209	0.0672043	32.3157	1.2266	2.16957	1.39804	0	0.860663	14.7344	2.27133	0.0356054	0
2000	1190	15.9949	49.7426	0.050018	20.4316	0.704212	0.32339	5.73951	0	9.24273	12.2137	1.52534	0.0268443	0
2000	1180	27.5828	50.0488	0.0646844	19.0796	0.768459	0.221616	6.37702	0	9.55077	12.3449	1.51436	0.029849	0
2000	1170	36.9393	50.1501	0.0809019	18.4291	0.841073	0.187234	6.88474	0	9.49922	12.3476	1.54621	0.0338063	0
2000	1160	44.7175	50.1837	0.0989653	18.0017	0.915178	0.169782	7.37384	0	9.35951	12.2733	1.58595	0.0381415	0
2000	1150	51.3535	50.1741	0.120982	17.6623	0.995538	0.159004	7.85779	0	9.19043	12.1732	1.62405	0.0425928	0
2000	1140	57.1412	50.1257	0.149635	17.3652	1.08682	0.151444	8.34116	0	9.01118	12.0643	1.65757	0.0469906	0
2000	1130	62.2925	50.0334	0.189135	17.0905	1.19525	0.14555	8.8263	0	8.82944	11.9537	1.68542	0.0511758	0
2000	1120	66.9611	49.8892	0.244783	16.8295	1.32673	0.140402	9.31306	0	8.64859	11.8453	1.7074	0.0549935	0
2000	1110	71.213	49.698	0.317832	16.5854	1.47767	0.135427	9.78886	0	8.47176	11.742	1.72474	0.0583587	0
2000	1100	74.9803	49.4962	0.398296	16.3742	1.62554	0.130594	10.2195	0	8.30564	11.6481	1.74051	0.0613587	0
2000	1090	78.151	49.3312	0.470859	16.2101	1.74215	0.126299	10.5716	0	8.15853	11.5676	1.75739	0.0641924	0
2000	1080	80.7222	49.2215	0.528307	16.0915	1.81712	0.122779	10.841	0	8.03406	11.5012	1.77559	0.0669823	0
2000	1070	82.7883	49.1596	0.571684	16.0074	1.85625	0.119982	11.0436	0	7.9306	11.447	1.79409	0.0697471	0
2000	1060	84.4617	49.1318	0.604426	15.9471	1.86939	0.117759	11.1979	0	7.8445	11.4027	1.81197	0.0724687	0
2000	1050	85.8363	49.1266	0.629587	15.903	1.86483	0.115969	11.3179	0	7.77223	11.366	1.82871	0.0751294	0
2000	1040	86.9829	49.1361	0.649365	15.87	1.84844	0.114502	11.4137	0	7.71086	11.3352	1.84413	0.0777193	0
2000	1030	87.953	49.155	0.66526	15.8447	1.8242	0.113281	11.492	0	7.65814	11.309	1.85821	0.0802351	0
2000	1020	88.7844	49.1799	0.678295	15.825	1.79475	0.112249	11.5574	0	7.61235	11.2864	1.87101	0.0826778	0
2000	1010	89.5053	49.2087	0.689173	15.8093	1.76189	0.111365	11.613	0	7.57218	11.2666	1.88264	0.0850512	0
2000	1000	90.1367	49.2399	0.698391	15.7967	1.7268	0.110599	11.6613	0	7.53662	11.2492	1.89321	0.0873602	0
2000	990	90.6948	49.2724	0.706305	15.7863	1.6903	0.109927	11.7039	0	7.50487	11.2336	1.90281	0.08961	0
2000	980	91.1921	49.3057	0.713176	15.7777	1.65294	0.109332	11.7419	0	7.47633	11.2195	1.91154	0.0918066	0
2000	970	91.6385	49.3394	0.719201	15.7705	1.61509	0.108802	11.7765	0	7.45049	11.2067	1.9195	0.0939557	0
2000	960	92.0417	49.373	0.724529	15.7643	1.57701	0.108324	11.8082	0	7.42695	11.1949	1.92674	0.0960632	0
2000	950	92.4081	49.4066	0.729276	15.759	1.53884	0.107891	11.8376	0	7.4054	11.184	1.93334	0.098135	0
2000	940	92.7598	49.4194	0.733936	15.7565	1.48283	0.107473	11.8842	0.0191888	7.38504	11.1735	1.93834	0.0995496	0
2000	930	93.0737	49.4426	0.737989	15.7536	1.43622	0.107101	11.9189	0.028796	7.36649	11.1639	1.9433	0.101203	0
2000	920	93.3623	49.4663	0.741675	15.7509	1.39063	0.106758	11.9513	0.0376791	7.34929	11.1548	1.94781	0.102827	0
2000	910	93.6288	49.4905	0.745042	15.7486	1.34594	0.106439	11.9818	0.0459261	7.33327	11.1462	1.9519	0.104427	0
2000	900	93.9407	49.534	0.750058	15.7434	1.28861	0.10605	12.0142	0.0559636	7.31374	11.1332	1.95408	0.106649	0
Title:	B2	Barnes	et	al	2010	table	5	n=15
Bulk	Composition:
Pressure	Temperature	mass	SiO2	TiO2	Al2O3	Fe2O3	Cr2O3	FeO	MnO	MgO	CaO	Na2O	K2O	H2O
2000	1600	100.262	50.6575	0.758017	15.659	1.71819	0.0997391	10.9702	0.189504	6.89197	10.6721	1.93494	0.249348	0.199478
2000	1600	100.262	50.6575	0.758017	15.659	1.71819	0.0997391	10.9702	0.189504	6.89197	10.6721	1.93494	0.249348	0.199478
2000	1590	100.261	50.6575	0.758018	15.6591	1.71698	0.0997392	10.9713	0.189504	6.89198	10.6721	1.93494	0.249348	0.199478
2000	1580	100.261	50.6576	0.758019	15.6591	1.7159	0.0997393	10.9723	0.189505	6.89199	10.6721	1.93494	0.249348	0.199479
2000	1570	100.261	50.6576	0.75802	15.6591	1.71496	0.0997394	10.9732	0.189505	6.89199	10.6721	1.93494	0.249349	0.199479
2000	1560	100.261	50.6577	0.75802	15.6591	1.71415	0.0997395	10.9739	0.189505	6.892	10.6721	1.93495	0.249349	0.199479
2000	1550	100.261	50.6577	0.758021	15.6591	1.71349	0.0997396	10.9745	0.189505	6.892	10.6721	1.93495	0.249349	0.199479
2000	1540	100.261	50.6577	0.758021	15.6591	1.71298	0.0997396	10.975	0.189505	6.89201	10.6721	1.93495	0.249349	0.199479
2000	1530	100.261	50.6578	0.758021	15.6591	1.71261	0.0997397	10.9753	0.189505	6.89201	10.6721	1.93495	0.249349	0.199479
2000	1520	100.261	50.6578	0.758021	15.6591	1.71239	0.0997397	10.9755	0.189505	6.89201	10.6721	1.93495	0.249349	0.199479
2000	1510	100.261	50.6578	0.758022	15.6591	1.71233	0.0997397	10.9756	0.189505	6.89201	10.6721	1.93495	0.249349	0.199479
2000	1500	100.261	50.6578	0.758021	15.6591	1.71243	0.0997397	10.9755	0.189505	6.89201	10.6721	1.93495	0.249349	0.199479
2000	1490	100.261	50.6578	0.758021	15.6591	1.71269	0.0997396	10.9752	0.189505	6.89201	10.6721	1.93495	0.249349	0.199479
2000	1480	100.261	50.6577	0.758021	15.6591	1.71312	0.0997396	10.9748	0.189505	6.89201	10.6721	1.93495	0.249349	0.199479
2000	1470	100.261	50.6577	0.75802	15.6591	1.71372	0.0997395	10.9743	0.189505	6.892	10.6721	1.93495	0.249349	0.199479
2000	1460	100.261	50.6577	0.75802	15.6591	1.71449	0.0997395	10.9736	0.189505	6.892	10.6721	1.93495	0.249349	0.199479
2000	1450	100.261	50.6576	0.758019	15.6591	1.71544	0.0997394	10.9727	0.189505	6.89199	10.6721	1.93494	0.249348	0.199479
2000	1440	100.261	50.6576	0.758018	15.6591	1.71658	0.0997393	10.9717	0.189505	6.89198	10.6721	1.93494	0.249348	0.199479
2000	1430	100.262	50.6575	0.758017	15.659	1.7179	0.0997391	10.9705	0.189504	6.89197	10.6721	1.93494	0.249348	0.199478
2000	1420	100.262	50.6574	0.758016	15.659	1.71941	0.099739	10.9691	0.189504	6.89196	10.6721	1.93494	0.249347	0.199478
2000	1410	100.262	50.6573	0.758015	15.659	1.72112	0.0997388	10.9675	0.189504	6.89195	10.6721	1.93493	0.249347	0.199478
2000	1400	100.262	50.6572	0.758013	15.659	1.72303	0.0997386	10.9658	0.189503	6.89194	10.672	1.93493	0.249347	0.199477
2000	1390	100.262	50.6571	0.758012	15.6589	1.72515	0.0997384	10.9639	0.189503	6.89192	10.672	1.93492	0.249346	0.199477
2000	1380	100.263	50.657	0.75801	15.6589	1.72748	0.0997382	10.9617	0.189503	6.89191	10.672	1.93492	0.249345	0.199476
2000	1370	100.263	50.6569	0.758008	15.6589	1.73003	0.0997379	10.9594	0.189502	6.89189	10.672	1.93492	0.249345	0.199476
2000	1360	100.263	50.6567	0.758006	15.6588	1.7328	0.0997376	10.9569	0.189501	6.89187	10.6719	1.93491	0.249344	0.199475
2000	1350	100.263	50.6566	0.758004	15.6588	1.7358	0.0997373	10.9541	0.189501	6.89185	10.6719	1.9349	0.249343	0.199475
2000	1340	100.264	50.6564	0.758001	15.6587	1.73905	0.099737	10.9512	0.1895	6.89183	10.6719	1.9349	0.249343	0.199474
2000	1330	100.264	50.6562	0.757999	15.6587	1.74253	0.0997367	10.948	0.1895	6.8918	10.6718	1.93489	0.249342	0.199473
2000	1320	100.264	50.6561	0.757996	15.6586	1.74627	0.0997363	10.9446	0.189499	6.89178	10.6718	1.93488	0.249341	0.199473
2000	1310	100.265	50.6559	0.757993	15.6585	1.75026	0.0997359	10.941	0.189498	6.89175	10.6717	1.93488	0.24934	0.199472
2000	1300	100.265	50.6556	0.757989	15.6585	1.75452	0.0997355	10.9371	0.189497	6.89172	10.6717	1.93487	0.249339	0.199471
2000	1290	100.266	50.6554	0.757986	15.6584	1.75905	0.099735	10.9329	0.189496	6.89169	10.6716	1.93486	0.249337	0.19947
2000	1280	100.266	50.6552	0.757982	15.6583	1.76386	0.0997345	10.9285	0.189496	6.89166	10.6716	1.93485	0.249336	0.199469
2000	1270	100.267	50.6549	0.757978	15.6582	1.76897	0.099734	10.9239	0.189495	6.89162	10.6715	1.93484	0.249335	0.199468
2000	1260	100.267	50.6546	0.757973	15.6581	1.77567	0.0997333	10.9178	0.189493	6.89157	10.6715	1.93483	0.249333	0.199467
2000	1250	100.268	50.6541	0.757967	15.658	1.78385	0.0997325	10.9103	0.189492	6.89152	10.6714	1.93481	0.249331	0.199465
2000	1240	100.269	50.6537	0.757961	15.6579	1.79252	0.0997317	10.9024	0.18949	6.89146	10.6713	1.93479	0.249329	0.199463
2000	1230	100.27	50.6532	0.757954	15.6577	1.80172	0.0997307	10.894	0.189488	6.89139	10.6712	1.93478	0.249327	0.199461
2000	1220	100.271	50.6527	0.757946	15.6576	1.81149	0.0997298	10.8851	0.189487	6.89133	10.6711	1.93476	0.249324	0.19946
2000	1210	100.272	50.6522	0.757938	15.6574	1.82186	0.0997287	10.8756	0.189485	6.89125	10.671	1.93474	0.249322	0.199457
2000	1200	100.273	50.6519	0.757934	15.6573	1.82739	0.0997282	10.8706	0.189483	6.89122	10.6709	1.93473	0.24932	0.199456
2000	1190	100.267	50.6548	0.757977	15.6582	1.77103	0.0997338	10.922	0.189494	6.89161	10.6715	1.93484	0.249335	0.199468
2000	1180	100.262	50.6572	0.758013	15.6589	1.72394	0.0997385	10.965	0.189503	6.89193	10.672	1.93493	0.249346	0.199477
2000	1170	100.258	50.6591	0.758041	15.6595	1.68693	0.0997422	10.9987	0.18951	6.89219	10.6724	1.935	0.249356	0.199484
2000	1160	100.256	50.6605	0.758063	15.66	1.65841	0.0997451	11.0247	0.189516	6.89238	10.6727	1.93505	0.249363	0.19949
2000	1150	100.254	50.6615	0.758077	15.6603	1.6391	0.099747	11.0424	0.189519	6.89252	10.6729	1.93509	0.249368	0.199494
2000	1140	100.253	50.6619	0.758083	15.6604	1.63105	0.0997478	11.0497	0.189521	6.89257	10.673	1.93511	0.24937	0.199496
2000	1130	100.254	50.6616	0.758078	15.6603	1.63801	0.0997471	11.0434	0.18952	6.89253	10.6729	1.93509	0.249368	0.199494
2000	1120	100.256	50.6602	0.758058	15.6599	1.66453	0.0997445	11.0192	0.189514	6.89234	10.6727	1.93504	0.249361	0.199489
2000	1110	100.261	50.6579	0.758023	15.6592	1.71072	0.0997398	10.977	0.189506	6.89202	10.6722	1.93495	0.24935	0.19948
2000	1100	100.266	50.6551	0.757981	15.6583	1.76514	0.0997344	10.9274	0.189495	6.89165	10.6716	1.93485	0.249336	0.199469
2000	1090	100.271	50.6528	0.757947	15.6576	1.8099	0.0997299	10.8865	0.189487	6.89134	10.6711	1.93476	0.249325	0.19946
2000	1080	100.273	50.6515	0.757928	15.6572	1.83529	0.0997274	10.8634	0.189482	6.89116	10.6708	1.93471	0.249318	0.199455
2000	1070	100.274	50.6512	0.757923	15.6571	1.84182	0.0997267	10.8574	0.189481	6.89112	10.6708	1.9347	0.249317	0.199453
2000	1060	100.273	50.6516	0.757929	15.6572	1.83385	0.0997275	10.8647	0.189482	6.89117	10.6708	1.93471	0.249319	0.199455
2000	1050	100.271	50.6525	0.757943	15.6575	1.81568	0.0997293	10.8813	0.189486	6.8913	10.671	1.93475	0.249323	0.199459
2000	1040	100.269	50.6538	0.757962	15.6579	1.79061	0.0997318	10.9041	0.18949	6.89147	10.6713	1.9348	0.24933	0.199464
2000	1030	100.266	50.6553	0.757985	15.6584	1.76099	0.0997348	10.9312	0.189496	6.89167	10.6716	1.93486	0.249337	0.19947
2000	1020	100.263	50.657	0.758009	15.6589	1.72841	0.0997381	10.9609	0.189502	6.8919	10.672	1.93492	0.249345	0.199476
2000	1010	100.259	50.6587	0.758036	15.6594	1.69395	0.0997415	10.9923	0.189509	6.89214	10.6723	1.93499	0.249354	0.199483
2000	1000	100.256	50.6605	0.758063	15.66	1.65836	0.0997451	11.0248	0.189516	6.89238	10.6727	1.93505	0.249363	0.19949
2000	990	100.252	50.6624	0.75809	15.6605	1.62213	0.0997487	11.0579	0.189523	6.89264	10.6731	1.93512	0.249372	0.199497
2000	980	100.248	50.6642	0.758118	15.6611	1.5856	0.0997524	11.0912	0.189529	6.89289	10.6735	1.9352	0.249381	0.199505
2000	970	100.245	50.6661	0.758146	15.6617	1.54898	0.099756	11.1246	0.189536	6.89314	10.6739	1.93527	0.24939	0.199512
2000	960	100.241	50.6679	0.758174	15.6623	1.51241	0.0997597	11.158	0.189543	6.89339	10.6743	1.93534	0.249399	0.199519
2000	950	100.237	50.6698	0.758201	15.6628	1.47598	0.0997633	11.1912	0.18955	6.89365	10.6747	1.93541	0.249408	0.199527
2000	940	100.232	50.6725	0.758242	15.6637	1.42268	0.0997687	11.2398	0.18956	6.89401	10.6752	1.93551	0.249422	0.199537
2000	930	100.227	50.6748	0.758276	15.6644	1.37843	0.0997731	11.2802	0.189569	6.89432	10.6757	1.9356	0.249433	0.199546
2000	920	100.223	50.677	0.758308	15.6651	1.33522	0.0997774	11.3196	0.189577	6.89462	10.6762	1.93568	0.249444	0.199555
2000	910	100.219	50.6791	0.758341	15.6657	1.2929	0.0997817	11.3582	0.189585	6.89491	10.6766	1.93576	0.249454	0.199563
2000	900	100.213	50.6818	0.758381	15.6666	1.23958	0.099787	11.4069	0.189595	6.89528	10.6772	1.93587	0.249467	0.199574
