# Supplementary material for: A 5-km-thick reservoir with > 380,000 km3 of magma within the ancient Earth's crust
Source: Sci Rep. 2022 Sep 19;12:15651. doi: 10.1038/s41598-022-19915-w (PMC9485162; doi:10.1038/s41598-022-19915-w)
Supplement: Supplementary file 13 — Supplementary Information 13. [file 41598_2022_19915_MOESM13_ESM.xlsx]

## Sheet: SuplTable S3
SupplTable S3A: Mineral assemblage, volume, Mg# in orthopyroxene and An in plagioclase resulted by fractional crystallization at 2 kbars of MZ-magma
Assemblage	Cumulate	Volume	Mg# in opx	An in pl	T (ºC)
	(in Fig X1)	(cm3)
opx-cpx-pl	A	1.665	81.7	68	1155
opx-cpx-pig-pl	B	1.527	81.2	67.5	1150
cpx-pig-pl	C	1.415		67	1145
