# Supplementary material for: A 5-km-thick reservoir with > 380,000 km3 of magma within the ancient Earth's crust
Source: Sci Rep. 2022 Sep 19;12:15651. doi: 10.1038/s41598-022-19915-w (PMC9485162; doi:10.1038/s41598-022-19915-w)
Supplement: Supplementary file 14 — Supplementary Information 14. [file 41598_2022_19915_MOESM14_ESM.xlsx]

## Sheet: MZ-magma - fractional c, 2 kbar
SupplTable S3B - Detailed fractional crystallization of MZ-magma at 2 kbar
System	Thermodynamic	Data:
Pressure	Temperature	mass	F	phi	S	H	V	dVdP*10^6	dVdT*10^6	Cp	logfO2(absolute)	logfO2-QFM	rhol	rhos	viscosity	aH2O	chisqr
2000	1500	99.9906	1	1	306.052	-1.19676e+06	40.6024	-389.433	3506.77	149.442	-5.494	0	2.46268	0	1.584	0.106831	0
2000	1500	99.9906	1	1	306.052	-1.19676e+06	40.6024	-389.433	3506.77	149.442	-5.494	0	2.46268	0	1.584	0.106831	0
2000	1495	99.9906	1	1	305.63	-1.19751e+06	40.5849	-389.018	3506.31	149.44	-5.533	0	2.46374	0	1.601	0.106723	0
2000	1490	99.9906	1	1	305.206	-1.19826e+06	40.5674	-388.602	3505.83	149.437	-5.573	0	2.4648	0	1.618	0.106614	0
2000	1485	99.9907	1	1	304.782	-1.19901e+06	40.5499	-388.188	3505.34	149.435	-5.612	0	2.46587	0	1.635	0.106505	0
2000	1480	99.9907	1	1	304.357	-1.19975e+06	40.5324	-387.774	3504.83	149.432	-5.652	0	2.46693	0	1.652	0.106397	0
2000	1475	99.9907	1	1	303.93	-1.2005e+06	40.5149	-387.36	3504.3	149.43	-5.692	0	2.468	0	1.669	0.106288	0
2000	1470	99.9907	1	1	303.502	-1.20125e+06	40.4974	-386.947	3503.76	149.427	-5.732	0	2.46907	0	1.687	0.10618	0
2000	1465	99.9907	1	1	303.073	-1.202e+06	40.4799	-386.535	3503.2	149.425	-5.772	0	2.47013	0	1.704	0.106071	0
2000	1460	99.9908	1	1	302.642	-1.20274e+06	40.4624	-386.122	3502.62	149.422	-5.813	0	2.4712	0	1.721	0.105963	0
2000	1455	99.9908	1	1	302.211	-1.20349e+06	40.4449	-385.711	3502.03	149.42	-5.853	0	2.47227	0	1.739	0.105854	0
2000	1450	99.9908	1	1	301.778	-1.20424e+06	40.4274	-385.3	3501.42	149.418	-5.894	0	2.47334	0	1.757	0.105745	0
2000	1445	99.9909	1	1	301.344	-1.20499e+06	40.4099	-384.889	3500.79	149.415	-5.936	0	2.47441	0	1.775	0.105637	0
2000	1440	99.9909	1	1	300.908	-1.20573e+06	40.3925	-384.479	3500.15	149.413	-5.977	0	2.47548	0	1.792	0.105528	0
2000	1435	99.991	1	1	300.472	-1.20648e+06	40.375	-384.069	3499.49	149.411	-6.019	0	2.47655	0	1.81	0.10542	0
2000	1430	99.991	1	1	300.034	-1.20723e+06	40.3576	-383.66	3498.82	149.408	-6.061	0	2.47763	0	1.829	0.105312	0
2000	1425	99.9911	1	1	299.595	-1.20798e+06	40.3401	-383.252	3498.13	149.406	-6.103	0	2.4787	0	1.847	0.105203	0
2000	1420	99.9911	1	1	299.154	-1.20872e+06	40.3227	-382.844	3497.42	149.404	-6.146	0	2.47977	0	1.865	0.105095	0
2000	1415	99.9912	1	1	298.713	-1.20947e+06	40.3052	-382.436	3496.69	149.402	-6.189	0	2.48085	0	1.884	0.104987	0
2000	1410	99.9912	1	1	298.27	-1.21022e+06	40.2878	-382.029	3495.95	149.399	-6.232	0	2.48192	0	1.902	0.104879	0
2000	1405	99.9913	1	1	297.825	-1.21097e+06	40.2704	-381.623	3495.19	149.397	-6.275	0	2.483	0	1.921	0.104771	0
2000	1400	99.9914	1	1	297.38	-1.21172e+06	40.253	-381.217	3494.42	149.395	-6.318	0	2.48407	0	1.94	0.104663	0
2000	1395	99.9914	1	1	296.933	-1.21246e+06	40.2356	-380.811	3493.63	149.393	-6.362	0	2.48515	0	1.958	0.104555	0
2000	1390	99.9915	1	1	296.485	-1.21321e+06	40.2182	-380.407	3492.82	149.391	-6.406	0	2.48623	0	1.977	0.104447	0
2000	1385	99.9916	1	1	296.035	-1.21396e+06	40.2008	-380.002	3492	149.389	-6.45	0	2.4873	0	1.997	0.10434	0
2000	1380	99.9917	1	1	295.584	-1.21471e+06	40.1834	-379.598	3491.16	149.387	-6.495	0	2.48838	0	2.016	0.104232	0
2000	1375	99.9917	1	1	295.132	-1.21546e+06	40.166	-379.195	3490.3	149.385	-6.54	0	2.48946	0	2.035	0.104125	0
2000	1370	99.9918	1	1	294.678	-1.2162e+06	40.1487	-378.792	3489.43	149.383	-6.585	0	2.49054	0	2.055	0.104018	0
2000	1365	99.9919	1	1	294.223	-1.21695e+06	40.1313	-378.39	3488.54	149.381	-6.63	0	2.49162	0	2.074	0.103911	0
2000	1360	99.992	1	1	293.767	-1.2177e+06	40.114	-377.989	3487.64	149.379	-6.676	0	2.4927	0	2.094	0.103805	0
2000	1355	99.9921	1	1	293.309	-1.21845e+06	40.0966	-377.587	3486.71	149.377	-6.722	0	2.49378	0	2.114	0.103698	0
2000	1350	99.9922	1	1	292.85	-1.2192e+06	40.0793	-377.187	3485.78	149.375	-6.768	0	2.49486	0	2.134	0.103592	0
2000	1345	99.9923	1	1	292.389	-1.21995e+06	40.0619	-376.787	3484.82	149.373	-6.815	0	2.49594	0	2.154	0.103486	0
2000	1340	99.9925	1	1	291.927	-1.22069e+06	40.0446	-376.388	3483.85	149.371	-6.862	0	2.49703	0	2.174	0.10338	0
2000	1335	99.9926	1	1	291.464	-1.22144e+06	40.0273	-375.989	3482.87	149.369	-6.909	0	2.49811	0	2.194	0.103274	0
2000	1330	99.9927	1	1	290.999	-1.22219e+06	40.01	-375.591	3481.86	149.367	-6.956	0	2.49919	0	2.215	0.103169	0
2000	1325	99.9928	1	1	290.533	-1.22294e+06	39.9927	-375.193	3480.84	149.365	-7.004	0	2.50028	0	2.235	0.103064	0
2000	1320	99.993	1	1	290.065	-1.22369e+06	39.9754	-374.796	3479.81	149.364	-7.052	0	2.50136	0	2.256	0.102959	0
2000	1315	99.9931	1	1	289.596	-1.22444e+06	39.9581	-374.399	3478.76	149.362	-7.1	0	2.50245	0	2.277	0.102855	0
2000	1310	99.9932	1	1	289.125	-1.22519e+06	39.9409	-374.003	3477.69	149.36	-7.149	0	2.50353	0	2.298	0.10275	0
2000	1305	99.9934	1	1	288.653	-1.22594e+06	39.9236	-373.608	3476.61	149.359	-7.198	0	2.50462	0	2.319	0.102647	0
2000	1300	99.9935	1	1	288.179	-1.22668e+06	39.9064	-373.213	3475.51	149.357	-7.247	0	2.5057	0	2.34	0.102543	0
2000	1295	99.9937	1	1	287.704	-1.22743e+06	39.8891	-372.819	3474.39	149.355	-7.296	0	2.50679	0	2.361	0.10244	0
2000	1290	99.9938	1	1	287.227	-1.22818e+06	39.8719	-372.425	3473.26	149.354	-7.346	0	2.50788	0	2.383	0.102337	0
2000	1285	99.994	1	1	286.749	-1.22893e+06	39.8547	-372.032	3472.11	149.352	-7.396	0	2.50896	0	2.405	0.102235	0
2000	1280	99.9942	1	1	286.27	-1.22968e+06	39.8375	-371.64	3470.95	149.351	-7.447	0	2.51005	0	2.426	0.102133	0
2000	1275	99.9944	1	1	285.788	-1.23043e+06	39.8203	-371.248	3469.77	149.349	-7.498	0	2.51114	0	2.448	0.102031	0
2000	1270	99.9945	1	1	285.306	-1.23118e+06	39.8031	-370.857	3468.58	149.348	-7.549	0	2.51223	0	2.47	0.10193	0
2000	1265	99.9947	1	1	284.821	-1.23193e+06	39.7859	-370.467	3467.36	149.346	-7.6	0	2.51332	0	2.493	0.101829	0
2000	1260	99.9949	1	1	284.335	-1.23268e+06	39.7687	-370.077	3466.14	149.345	-7.652	0	2.51441	0	2.515	0.101729	0
2000	1255	99.9951	1	1	283.848	-1.23343e+06	39.7516	-369.688	3464.89	149.343	-7.704	0	2.5155	0	2.537	0.101629	0
2000	1250	99.9953	1	1	283.359	-1.23418e+06	39.7344	-369.299	3463.63	149.342	-7.757	0	2.51659	0	2.56	0.10153	0
2000	1245	99.9955	1	1	282.868	-1.23493e+06	39.7173	-368.911	3462.36	149.341	-7.81	0	2.51768	0	2.583	0.101431	0
2000	1240	99.9957	1	1	282.376	-1.23568e+06	39.7002	-368.524	3461.07	149.339	-7.863	0	2.51877	0	2.606	0.101332	0
2000	1235	99.9959	1	1	281.882	-1.23643e+06	39.683	-368.137	3459.76	149.338	-7.917	0	2.51986	0	2.629	0.101235	0
2000	1230	99.9962	1	1	281.387	-1.23718e+06	39.6659	-367.751	3458.44	149.337	-7.97	0	2.52096	0	2.652	0.101138	0
2000	1225	99.9964	1	1	280.89	-1.23793e+06	39.6488	-367.366	3457.1	149.336	-8.025	0	2.52205	0	2.675	0.101041	0
2000	1220	99.9966	1	1	280.391	-1.23868e+06	39.6318	-366.981	3455.75	149.334	-8.079	0	2.52314	0	2.699	0.100945	0
2000	1215	99.9969	1	1	279.89	-1.23943e+06	39.6147	-366.597	3454.38	149.333	-8.134	0	2.52424	0	2.723	0.10085	0
2000	1210	99.9971	1	1	279.388	-1.24018e+06	39.5976	-366.214	3452.99	149.332	-8.19	0	2.52533	0	2.747	0.100755	0
2000	1205	99.9974	1	1	278.89	-1.24092e+06	39.5806	-365.831	3451.59	144.703	-8.245	0	2.52642	0	2.771	0.100661	0
2000	1200	99.9976	1	1	278.4	-1.24165e+06	39.5636	-365.449	3450.18	144.696	-8.302	0	2.52752	0	2.795	0.100568	0
2000	1195	99.9979	1	1	277.909	-1.24237e+06	39.5465	-365.068	3448.74	144.69	-8.358	0	2.52861	0	2.819	0.100475	0
2000	1190	99.9982	1	1	277.416	-1.2431e+06	39.5295	-364.687	3447.3	144.683	-8.415	0	2.52971	0	2.844	0.100384	0
2000	1185	99.9984	1	1	276.921	-1.24383e+06	39.5125	-364.307	3445.83	144.676	-8.472	0	2.5308	0	2.869	0.100293	0
2000	1180	99.9987	1	1	276.425	-1.24456e+06	39.4955	-363.928	3444.35	144.668	-8.53	0	2.5319	0	2.893	0.100202	0
2000	1175	99.999	1	1	275.927	-1.24528e+06	39.4786	-363.55	3442.86	144.661	-8.588	0	2.533	0	2.918	0.100113	0
2000	1170	99.9993	1	1	275.427	-1.24601e+06	39.4616	-363.172	3441.35	144.654	-8.646	0	2.53409	0	2.944	0.100024	0
2000	1165	99.9996	1	1	274.925	-1.24674e+06	39.4447	-362.795	3439.83	144.646	-8.705	0	2.53519	0	2.969	0.0999366	0
2000	1160	99.9999	1	1	274.422	-1.24747e+06	39.4277	-362.419	3438.29	144.638	-8.765	0	2.53628	0	2.995	0.0998497	0
2000	1155	99.9987	0.952013	0.957611	272.768	-1.24981e+06	39.2686	-354.295	3378.37	143.28	-8.824	0	2.53165	2.8828	3.023	0.107552	0
2000	1150	95.2018	0.953746	0.959245	259.752	-1.18818e+06	37.4594	-344.778	3271.07	136.16	-8.885	0	2.5269	2.88439	3.052	0.115441	0
2000	1145	90.8011	0.955057	0.960469	247.805	-1.13184e+06	35.7999	-335.886	3172.06	129.637	-8.945	0	2.52206	2.8836	3.08	0.123569	0
2000	1140	86.722	0.957119	0.962321	236.741	-1.07975e+06	34.2634	-327.663	3081.16	123.62	-9.006	0	2.51736	2.88053	3.106	0.131783	0
2000	1135	83.0051	0.958985	0.963996	226.649	-1.03232e+06	32.8612	-320.055	2998.1	118.14	-9.067	0	2.5128	2.87749	3.132	0.140074	0
2000	1130	79.6026	0.96069	0.965523	217.401	-988932	31.5758	-312.984	2921.85	113.127	-9.129	0	2.50838	2.8744	3.156	0.148437	0
2000	1125	76.4754	0.962251	0.966919	208.894	-949081	30.3927	-306.387	2851.58	108.524	-9.192	0	2.50409	2.87127	3.179	0.156865	0
2000	1120	73.5907	0.963685	0.968199	201.039	-912343	29.2998	-300.209	2786.59	104.28	-9.254	0	2.49993	2.8681	3.202	0.165353	0
2000	1115	70.9204	0.965005	0.969375	193.761	-878358	28.2867	-294.404	2726.27	100.356	-9.318	0	2.4959	2.86491	3.223	0.173897	0
2000	1110	68.4408	0.966224	0.970459	186.997	-846818	27.3445	-288.931	2670.1	96.7156	-9.381	0	2.49198	2.86171	3.243	0.182494	0
2000	1105	66.1314	0.96735	0.971459	180.691	-817461	26.4658	-283.758	2617.66	93.328	-9.445	0	2.48818	2.85851	3.262	0.19114	0
2000	1100	63.9745	0.968394	0.972385	174.797	-790058	25.6438	-278.854	2568.54	90.1672	-9.51	0	2.48449	2.8553	3.281	0.199831	0
2000	1095	61.9548	0.969362	0.973243	169.273	-764412	24.873	-274.194	2522.43	87.2105	-9.575	0	2.48091	2.85211	3.298	0.208567	0
2000	1090	60.059	0.970263	0.97404	164.084	-740353	24.1485	-269.754	2479.02	84.438	-9.64	0	2.47743	2.84895	3.314	0.217343	0
2000	1085	58.2755	0.971102	0.974782	159.199	-717730	23.4658	-265.514	2438.07	81.8324	-9.706	0	2.47405	2.84582	3.33	0.226159	0
2000	1080	56.5939	0.971885	0.975474	154.589	-696411	22.8211	-261.459	2399.35	79.3784	-9.773	0	2.47077	2.84272	3.344	0.235011	0
2000	1075	55.0052	0.972617	0.976119	150.231	-676280	22.2112	-257.571	2362.67	77.0625	-9.84	0	2.46758	2.83968	3.358	0.243898	0
2000	1070	53.5015	0.973301	0.976723	146.103	-657236	21.6331	-253.837	2327.84	74.8728	-9.907	0	2.46447	2.83669	3.371	0.252818	0
2000	1065	52.0756	0.973943	0.977289	142.186	-639186	21.084	-250.246	2294.71	72.7988	-9.975	0	2.46145	2.83376	3.383	0.26177	0
2000	1060	50.7213	0.974545	0.977819	138.463	-622050	20.5618	-246.785	2263.14	70.831	-10.044	0	2.45852	2.83091	3.394	0.270751	0
2000	1055	49.4327	0.975111	0.978318	134.919	-605756	20.0642	-243.446	2233.02	68.9609	-10.113	0	2.45566	2.82814	3.404	0.279761	0
2000	1050	48.205	0.975643	0.978787	131.54	-590237	19.5893	-240.219	2204.22	67.1812	-10.183	0	2.45287	2.82545	3.414	0.288796	0
2000	1045	47.0335	0.976144	0.979228	128.314	-575437	19.1356	-237.097	2176.64	65.4849	-10.253	0	2.45016	2.82285	3.423	0.297856	0
2000	1040	45.9141	0.976616	0.979644	125.231	-561303	18.7015	-234.072	2150.2	63.8659	-10.323	0	2.44752	2.82036	3.431	0.306938	0
2000	1035	44.8431	0.977062	0.980038	122.278	-547787	18.2855	-231.139	2124.82	62.3187	-10.394	0	2.44494	2.81798	3.438	0.316042	0
2000	1030	43.8171	0.977482	0.980409	119.449	-534846	17.8865	-228.29	2100.41	60.8383	-10.466	0	2.44242	2.81571	3.445	0.325165	0
2000	1025	42.8332	0.97788	0.980761	116.735	-522442	17.5033	-225.522	2076.91	59.4202	-10.538	0	2.43996	2.81357	3.451	0.334305	0
2000	1020	41.8884	0.978255	0.981093	114.127	-510539	17.1348	-222.828	2054.42	58.0654	-10.611	0	2.43756	2.81155	3.456	0.343461	0
2000	1015	40.9803	0.978609	0.981407	111.62	-499105	16.7802	-220.205	2032.56	56.7596	-10.684	0	2.43521	2.80967	3.461	0.352632	0
2000	1010	40.1064	0.978943	0.981704	109.206	-488108	16.4385	-217.648	2011.44	55.5044	-10.758	0	2.43292	2.80793	3.465	0.361816	0
2000	1005	39.2648	0.979046	0.981849	106.879	-477528	16.109	-215.146	1990.78	54.2944	-10.833	0	2.43048	2.81387	3.469	0.371068	0
2000	1000	38.4477	0.977386	0.980862	104.599	-467327	15.7894	-212.641	1968.6	53.0997	-10.908	0	2.42641	2.87733	3.478	0.380853	0
2000	995	37.5864	0.974906	0.97938	102.213	-456968	15.4615	-210.1	1943.48	51.842	-10.984	0	2.41986	2.95849	3.497	0.391414	0
2000	990	36.6515	0.975168	0.979676	99.6955	-446178	15.1181	-207.603	1918.22	50.5261	-11.06	0	2.41319	2.96202	3.515	0.402015	0
2000	985	35.7496	0.975692	0.980132	97.2712	-435807	14.7872	-205.183	1893.97	49.2618	-11.137	0	2.40665	2.95795	3.532	0.412574	0
2000	980	34.8887	0.976183	0.980563	94.9555	-425907	14.4707	-202.837	1870.75	48.0559	-11.214	0	2.40022	2.95427	3.548	0.42309	0
2000	975	34.0651	0.976375	0.980825	92.7306	-416444	14.1693	-200.597	1847.79	46.8942	-11.293	0	2.39324	2.96204	3.568	0.433916	0
2000	970	33.267	0.975842	0.980409	90.5767	-407412	13.8779	-198.354	1825.21	45.7712	-11.371	0	2.38595	2.956	3.588	0.445244	0
2000	965	32.4699	0.97625	0.980784	88.4388	-398402	13.5869	-196.153	1803.2	44.6588	-11.451	0	2.37874	2.95361	3.606	0.456563	0
2000	960	31.7051	0.976647	0.981148	86.3873	-389760	13.3072	-194.011	1782.01	43.5927	-11.531	0	2.37162	2.95137	3.624	0.467863	0
2000	955	30.971	0.977035	0.981503	84.4174	-381465	13.0382	-191.926	1761.61	42.5702	-11.611	0	2.36458	2.94923	3.64	0.479135	0
2000	950	30.2659	0.977413	0.98185	82.5249	-373499	12.7794	-189.893	1741.95	41.589	-11.693	0	2.35763	2.9472	3.655	0.490371	0
2000	945	29.5883	0.977785	0.982189	80.7058	-365844	12.5302	-187.912	1722.99	40.647	-11.775	0	2.35076	2.94523	3.67	0.50156	0
2000	940	28.9369	0.978149	0.982521	78.9565	-358486	12.2902	-185.979	1704.69	39.7422	-11.857	0	2.34398	2.94332	3.683	0.512694	0
2000	935	28.3104	0.978508	0.982847	77.2735	-351410	12.059	-184.094	1687.01	38.8726	-11.941	0	2.33729	2.94144	3.696	0.523762	0
2000	930	27.7077	0.978862	0.983167	75.6537	-344601	11.8361	-182.254	1669.92	38.0367	-12.025	0	2.3307	2.93958	3.707	0.534757	0
2000	925	27.1276	0.979211	0.983481	74.0942	-338048	11.6212	-180.457	1653.4	37.2328	-12.11	0	2.32419	2.93772	3.717	0.545667	0
2000	920	26.5692	0.979557	0.983791	72.5922	-331739	11.4139	-178.701	1637.42	36.4593	-12.195	0	2.31778	2.93586	3.727	0.556484	0
2000	915	26.0316	0.979899	0.984096	71.1451	-325663	11.2139	-176.986	1621.94	35.715	-12.281	0	2.31147	2.93398	3.735	0.5672	0
2000	910	25.5137	0.980237	0.984396	69.7505	-319809	11.0208	-175.309	1606.95	34.9986	-12.368	0	2.30526	2.93208	3.743	0.577804	0
2000	905	25.0148	0.980572	0.984692	68.4061	-314167	10.8345	-173.669	1592.42	34.3087	-12.456	0	2.29915	2.93013	3.749	0.588289	0
2000	900	24.5341	0.980905	0.984983	67.1098	-308730	10.6546	-172.066	1578.33	33.6442	-12.544	0	2.29315	2.92815	3.755	0.598647	0
Liquid	Composition:
Pressure	Temperature	mass	SiO2	TiO2	Al2O3	Fe2O3	Cr2O3	FeO	MnO	MgO	CaO	Na2O	K2O	H2O
2000	1500	99.9906	55.3327	0.144645	16.8307	1.20189	0.000107894	6.74269	0.21034	5.33613	8.20452	4.83979	0.104815	1.0517
2000	1500	99.9906	55.3327	0.144645	16.8307	1.20189	0.000107894	6.74269	0.21034	5.33613	8.20452	4.83979	0.104815	1.0517
2000	1495	99.9906	55.3327	0.144645	16.8307	1.20197	0.000107894	6.74263	0.21034	5.33613	8.20452	4.83979	0.104815	1.0517
2000	1490	99.9906	55.3327	0.144645	16.8307	1.20207	0.000107894	6.74253	0.21034	5.33613	8.20452	4.83979	0.104815	1.0517
2000	1485	99.9907	55.3327	0.144645	16.8307	1.2022	0.000107894	6.74241	0.21034	5.33613	8.20452	4.83979	0.104815	1.0517
2000	1480	99.9907	55.3327	0.144644	16.8307	1.20236	0.000107894	6.74226	0.21034	5.33613	8.20452	4.83979	0.104815	1.0517
2000	1475	99.9907	55.3327	0.144644	16.8307	1.20256	0.000107894	6.74209	0.21034	5.33613	8.20451	4.83979	0.104815	1.0517
2000	1470	99.9907	55.3326	0.144644	16.8307	1.20278	0.000107894	6.74189	0.21034	5.33613	8.20451	4.83979	0.104815	1.0517
2000	1465	99.9907	55.3326	0.144644	16.8307	1.20303	0.000107894	6.74166	0.210339	5.33612	8.20451	4.83979	0.104815	1.0517
2000	1460	99.9908	55.3326	0.144644	16.8307	1.20331	0.000107894	6.7414	0.210339	5.33612	8.20451	4.83979	0.104815	1.0517
2000	1455	99.9908	55.3326	0.144644	16.8306	1.20362	0.000107894	6.74112	0.210339	5.33612	8.2045	4.83979	0.104815	1.0517
2000	1450	99.9908	55.3326	0.144644	16.8306	1.20397	0.000107894	6.74081	0.210339	5.33612	8.2045	4.83978	0.104815	1.0517
2000	1445	99.9909	55.3326	0.144644	16.8306	1.20434	0.000107894	6.74047	0.210339	5.33612	8.2045	4.83978	0.104815	1.0517
2000	1440	99.9909	55.3325	0.144644	16.8306	1.20475	0.000107894	6.7401	0.210339	5.33612	8.2045	4.83978	0.104815	1.0517
2000	1435	99.991	55.3325	0.144644	16.8306	1.20519	0.000107894	6.7397	0.210339	5.33611	8.20449	4.83978	0.104814	1.0517
2000	1430	99.991	55.3325	0.144644	16.8306	1.20566	0.000107894	6.73927	0.210339	5.33611	8.20449	4.83978	0.104814	1.05169
2000	1425	99.9911	55.3325	0.144644	16.8306	1.20616	0.000107894	6.73881	0.210339	5.33611	8.20448	4.83977	0.104814	1.05169
2000	1420	99.9911	55.3324	0.144644	16.8306	1.2067	0.000107894	6.73833	0.210339	5.3361	8.20448	4.83977	0.104814	1.05169
2000	1415	99.9912	55.3324	0.144644	16.8306	1.20728	0.000107894	6.73781	0.210339	5.3361	8.20447	4.83977	0.104814	1.05169
2000	1410	99.9912	55.3324	0.144644	16.8306	1.20788	0.000107893	6.73725	0.210338	5.3361	8.20447	4.83977	0.104814	1.05169
2000	1405	99.9913	55.3323	0.144644	16.8306	1.20852	0.000107893	6.73667	0.210338	5.33609	8.20446	4.83976	0.104814	1.05169
2000	1400	99.9914	55.3323	0.144644	16.8306	1.2092	0.000107893	6.73606	0.210338	5.33609	8.20446	4.83976	0.104814	1.05169
2000	1395	99.9914	55.3322	0.144643	16.8305	1.20991	0.000107893	6.73541	0.210338	5.33609	8.20445	4.83976	0.104814	1.05169
2000	1390	99.9915	55.3322	0.144643	16.8305	1.21066	0.000107893	6.73473	0.210338	5.33608	8.20445	4.83975	0.104814	1.05169
2000	1385	99.9916	55.3322	0.144643	16.8305	1.21145	0.000107893	6.73402	0.210338	5.33608	8.20444	4.83975	0.104814	1.05169
2000	1380	99.9917	55.3321	0.144643	16.8305	1.21227	0.000107893	6.73327	0.210338	5.33607	8.20443	4.83974	0.104814	1.05169
2000	1375	99.9917	55.3321	0.144643	16.8305	1.21313	0.000107893	6.73249	0.210337	5.33607	8.20443	4.83974	0.104814	1.05169
2000	1370	99.9918	55.332	0.144643	16.8305	1.21403	0.000107893	6.73168	0.210337	5.33607	8.20442	4.83974	0.104814	1.05169
2000	1365	99.9919	55.332	0.144643	16.8305	1.21497	0.000107893	6.73082	0.210337	5.33606	8.20441	4.83973	0.104813	1.05168
2000	1360	99.992	55.3319	0.144643	16.8304	1.21594	0.000107893	6.72994	0.210337	5.33606	8.2044	4.83973	0.104813	1.05168
2000	1355	99.9921	55.3319	0.144642	16.8304	1.21696	0.000107892	6.72902	0.210337	5.33605	8.2044	4.83972	0.104813	1.05168
2000	1350	99.9922	55.3318	0.144642	16.8304	1.21801	0.000107892	6.72806	0.210336	5.33604	8.20439	4.83972	0.104813	1.05168
2000	1345	99.9923	55.3317	0.144642	16.8304	1.21911	0.000107892	6.72706	0.210336	5.33604	8.20438	4.83971	0.104813	1.05168
2000	1340	99.9925	55.3317	0.144642	16.8304	1.22025	0.000107892	6.72603	0.210336	5.33603	8.20437	4.8397	0.104813	1.05168
2000	1335	99.9926	55.3316	0.144642	16.8303	1.22143	0.000107892	6.72496	0.210336	5.33603	8.20436	4.8397	0.104813	1.05168
2000	1330	99.9927	55.3315	0.144642	16.8303	1.22265	0.000107892	6.72385	0.210335	5.33602	8.20435	4.83969	0.104813	1.05168
2000	1325	99.9928	55.3315	0.144641	16.8303	1.22392	0.000107892	6.7227	0.210335	5.33601	8.20434	4.83969	0.104813	1.05168
2000	1320	99.993	55.3314	0.144641	16.8303	1.22523	0.000107892	6.72151	0.210335	5.33601	8.20433	4.83968	0.104812	1.05167
2000	1315	99.9931	55.3313	0.144641	16.8303	1.22658	0.000107891	6.72028	0.210335	5.336	8.20432	4.83967	0.104812	1.05167
2000	1310	99.9932	55.3312	0.144641	16.8302	1.22798	0.000107891	6.71901	0.210334	5.33599	8.2043	4.83967	0.104812	1.05167
2000	1305	99.9934	55.3312	0.144641	16.8302	1.22943	0.000107891	6.7177	0.210334	5.33598	8.20429	4.83966	0.104812	1.05167
2000	1300	99.9935	55.3311	0.14464	16.8302	1.23092	0.000107891	6.71634	0.210334	5.33598	8.20428	4.83965	0.104812	1.05167
2000	1295	99.9937	55.331	0.14464	16.8302	1.23246	0.000107891	6.71495	0.210333	5.33597	8.20427	4.83965	0.104812	1.05167
2000	1290	99.9938	55.3309	0.14464	16.8301	1.23405	0.000107891	6.71351	0.210333	5.33596	8.20425	4.83964	0.104811	1.05166
2000	1285	99.994	55.3308	0.14464	16.8301	1.23568	0.00010789	6.71202	0.210333	5.33595	8.20424	4.83963	0.104811	1.05166
2000	1280	99.9942	55.3307	0.144639	16.8301	1.23736	0.00010789	6.7105	0.210332	5.33594	8.20423	4.83962	0.104811	1.05166
2000	1275	99.9944	55.3306	0.144639	16.8301	1.2391	0.00010789	6.70892	0.210332	5.33593	8.20421	4.83961	0.104811	1.05166
2000	1270	99.9945	55.3305	0.144639	16.83	1.24088	0.00010789	6.7073	0.210331	5.33592	8.2042	4.8396	0.104811	1.05166
2000	1265	99.9947	55.3304	0.144639	16.83	1.24272	0.00010789	6.70564	0.210331	5.33591	8.20418	4.8396	0.104811	1.05166
2000	1260	99.9949	55.3303	0.144638	16.83	1.24461	0.000107889	6.70392	0.210331	5.3359	8.20417	4.83959	0.10481	1.05165
2000	1255	99.9951	55.3302	0.144638	16.8299	1.24655	0.000107889	6.70216	0.21033	5.33589	8.20415	4.83958	0.10481	1.05165
2000	1250	99.9953	55.3301	0.144638	16.8299	1.24854	0.000107889	6.70035	0.21033	5.33588	8.20414	4.83957	0.10481	1.05165
2000	1245	99.9955	55.33	0.144637	16.8299	1.25059	0.000107889	6.69849	0.210329	5.33587	8.20412	4.83956	0.10481	1.05165
2000	1240	99.9957	55.3299	0.144637	16.8298	1.2527	0.000107889	6.69658	0.210329	5.33586	8.2041	4.83955	0.104809	1.05165
2000	1235	99.9959	55.3297	0.144637	16.8298	1.25486	0.000107888	6.69461	0.210329	5.33585	8.20408	4.83954	0.104809	1.05164
2000	1230	99.9962	55.3296	0.144637	16.8297	1.25708	0.000107888	6.6926	0.210328	5.33584	8.20406	4.83953	0.104809	1.05164
2000	1225	99.9964	55.3295	0.144636	16.8297	1.25936	0.000107888	6.69053	0.210328	5.33582	8.20405	4.83952	0.104809	1.05164
2000	1220	99.9966	55.3294	0.144636	16.8297	1.26169	0.000107888	6.68841	0.210327	5.33581	8.20403	4.8395	0.104809	1.05164
2000	1215	99.9969	55.3292	0.144636	16.8296	1.26409	0.000107887	6.68624	0.210327	5.3358	8.20401	4.83949	0.104808	1.05163
2000	1210	99.9971	55.3291	0.144635	16.8296	1.26655	0.000107887	6.68401	0.210326	5.33578	8.20399	4.83948	0.104808	1.05163
2000	1205	99.9974	55.329	0.144635	16.8295	1.26907	0.000107887	6.68172	0.210326	5.33577	8.20397	4.83947	0.104808	1.05163
2000	1200	99.9976	55.3288	0.144634	16.8295	1.27165	0.000107887	6.67937	0.210325	5.33576	8.20395	4.83946	0.104807	1.05163
2000	1195	99.9979	55.3287	0.144634	16.8295	1.2743	0.000107886	6.67697	0.210324	5.33574	8.20392	4.83944	0.104807	1.05162
2000	1190	99.9982	55.3285	0.144634	16.8294	1.27701	0.000107886	6.67451	0.210324	5.33573	8.2039	4.83943	0.104807	1.05162
2000	1185	99.9984	55.3284	0.144633	16.8294	1.27979	0.000107886	6.67199	0.210323	5.33571	8.20388	4.83942	0.104807	1.05162
2000	1180	99.9987	55.3282	0.144633	16.8293	1.28264	0.000107885	6.6694	0.210323	5.3357	8.20385	4.8394	0.104806	1.05161
2000	1175	99.999	55.328	0.144632	16.8293	1.28555	0.000107885	6.66676	0.210322	5.33568	8.20383	4.83939	0.104806	1.05161
2000	1170	99.9993	55.3279	0.144632	16.8292	1.28854	0.000107885	6.66405	0.210321	5.33567	8.20381	4.83937	0.104806	1.05161
2000	1165	99.9996	55.3277	0.144632	16.8292	1.29159	0.000107884	6.66127	0.210321	5.33565	8.20378	4.83936	0.104805	1.0516
2000	1160	99.9999	55.3275	0.144631	16.8291	1.29472	0.000107884	6.65843	0.21032	5.33563	8.20376	4.83934	0.104805	1.0516
2000	1155	95.2001	55.4974	0.151049	16.7148	1.32676	0.000113323	6.80925	0.220924	5.10749	7.97933	4.97857	0.109686	1.10462
2000	1150	90.7984	55.6699	0.157491	16.6005	1.35631	0.000118817	6.94312	0.231634	4.8896	7.76222	5.11638	0.11459	1.15817
2000	1145	86.7202	55.8443	0.164033	16.4813	1.38432	0.000124405	7.0634	0.242527	4.67764	7.55697	5.25326	0.11955	1.21264
2000	1140	83.0033	56.0143	0.17052	16.3586	1.41204	0.000129976	7.18022	0.253388	4.47478	7.35839	5.38619	0.124465	1.26694
2000	1135	79.6007	56.1801	0.176955	16.2327	1.43951	0.000135532	7.29378	0.264219	4.28055	7.16621	5.51534	0.129337	1.32109
2000	1130	76.4734	56.3418	0.183343	16.1038	1.46677	0.000141074	7.40432	0.275024	4.09454	6.98018	5.64083	0.134168	1.37512
2000	1125	73.5886	56.4994	0.189689	15.9718	1.49386	0.000146604	7.51204	0.285805	3.91634	6.80005	5.7628	0.138958	1.42903
2000	1120	70.9182	56.6531	0.195997	15.8372	1.52081	0.000152124	7.61712	0.296567	3.74557	6.62558	5.88138	0.14371	1.48283
2000	1115	68.4386	56.8029	0.202272	15.6999	1.54767	0.000157636	7.71974	0.307312	3.58186	6.45655	5.99668	0.148423	1.53656
2000	1110	66.1291	56.9489	0.208518	15.5601	1.57445	0.000163141	7.82004	0.318045	3.42489	6.29275	6.10883	0.1531	1.59022
2000	1105	63.9722	57.0911	0.214739	15.418	1.60119	0.000168642	7.91817	0.328768	3.27431	6.13397	6.21795	0.157742	1.64384
2000	1100	61.9525	57.2298	0.220939	15.2737	1.62791	0.00017414	8.01425	0.339486	3.12984	5.98001	6.32413	0.16235	1.69743
2000	1095	60.0566	57.3648	0.227121	15.1274	1.65463	0.000179637	8.10838	0.350203	2.99116	5.83069	6.42749	0.166925	1.75101
2000	1090	58.2731	57.4965	0.233291	14.979	1.68138	0.000185135	8.20068	0.360922	2.85801	5.68583	6.52813	0.171469	1.80461
2000	1085	56.5914	57.6247	0.239452	14.8288	1.70817	0.000190637	8.29123	0.371646	2.73014	5.54525	6.62615	0.175982	1.85823
2000	1080	55.0028	57.7497	0.245606	14.6769	1.73502	0.000196143	8.38011	0.382381	2.60729	5.4088	6.72164	0.180466	1.9119
2000	1075	53.499	57.8714	0.251758	14.5234	1.76196	0.000201656	8.46738	0.393129	2.48923	5.27633	6.8147	0.184922	1.96564
2000	1070	52.0731	57.99	0.257911	14.3683	1.78898	0.000207178	8.55312	0.403894	2.37574	5.14767	6.90542	0.18935	2.01947
2000	1065	50.7187	58.1055	0.264068	14.2117	1.81612	0.00021271	8.63736	0.414679	2.26662	5.02269	6.99388	0.193752	2.0734
2000	1060	49.4302	58.218	0.270232	14.0538	1.84338	0.000218255	8.72015	0.425489	2.16167	4.90125	7.08016	0.198128	2.12745
2000	1055	48.2024	58.3277	0.276406	13.8947	1.87077	0.000223815	8.80152	0.436327	2.06071	4.78322	7.16435	0.202478	2.18163
2000	1050	47.0309	58.4345	0.282594	13.7343	1.8983	0.00022939	8.8815	0.447196	1.96355	4.66848	7.24653	0.206805	2.23598
2000	1045	45.9114	58.5386	0.288796	13.5729	1.92599	0.000234983	8.96011	0.458099	1.87003	4.5569	7.32677	0.211107	2.2905
2000	1040	44.8404	58.6399	0.295016	13.4105	1.95383	0.000240595	9.03736	0.469041	1.78	4.44837	7.40515	0.215387	2.3452
2000	1035	43.8145	58.7387	0.301257	13.2471	1.98184	0.000246229	9.11325	0.480024	1.6933	4.34278	7.48174	0.219643	2.40012
2000	1030	42.8305	58.835	0.30752	13.0828	2.01003	0.000251886	9.18778	0.491052	1.6098	4.24001	7.55661	0.223877	2.45526
2000	1025	41.8857	58.9289	0.313808	12.9177	2.03839	0.000257568	9.26094	0.502128	1.52936	4.13996	7.62983	0.228089	2.51064
2000	1020	40.9776	59.0204	0.320122	12.7519	2.06693	0.000263276	9.33271	0.513256	1.45186	4.04253	7.70148	0.23228	2.56628
2000	1015	40.1037	59.1096	0.326465	12.5854	2.09567	0.000269013	9.40309	0.524441	1.37718	3.94762	7.77162	0.23645	2.6222
2000	1010	39.2619	59.1967	0.332838	12.4182	2.12459	0.00027478	9.47203	0.535685	1.3052	3.85514	7.84032	0.240599	2.67842
2000	1005	38.4421	59.2904	0.337743	12.2506	2.15237	0.000111458	9.5318	0.547109	1.2358	3.76479	7.90889	0.244776	2.73554
2000	1000	37.5782	59.4625	0.328254	12.0829	2.16805	8.09615e-07	9.51914	0.559685	1.16924	3.67508	7.98735	0.249374	2.79843
2000	995	36.6432	59.7538	0.298591	11.9152	2.16461	0	9.3964	0.573967	1.10631	3.5856	8.08108	0.254611	2.86984
2000	990	35.7414	60.053	0.26903	11.7465	2.15888	0	9.26236	0.588449	1.04664	3.49879	8.17429	0.259871	2.94225
2000	985	34.8806	60.348	0.241563	11.5769	2.15274	0	9.12786	0.602971	0.989955	3.41475	8.26538	0.265088	3.01485
2000	980	34.0578	60.6394	0.216075	11.4064	2.14611	0	8.9926	0.617539	0.936108	3.33334	8.35446	0.270263	3.08769
2000	975	33.2603	60.9699	0.194215	11.2332	2.13353	0	8.83	0.621495	0.884265	3.25563	8.44056	0.275439	3.16173
2000	970	32.4633	61.3119	0.17558	11.0506	2.1187	0	8.65253	0.622062	0.828653	3.19229	8.52765	0.28079	3.23935
2000	965	31.6987	61.651	0.158448	10.8674	2.10298	0	8.4738	0.622204	0.775782	3.13133	8.61345	0.28612	3.31749
2000	960	30.9647	61.9873	0.142716	10.6839	2.08637	0	8.29396	0.621952	0.725551	3.07261	8.69803	0.291428	3.39613
2000	955	30.2597	62.321	0.12829	10.5002	2.06886	0	8.11315	0.621337	0.677864	3.01597	8.78143	0.296713	3.47525
2000	950	29.5823	62.652	0.115081	10.3162	2.05045	0	7.93155	0.620392	0.632628	2.96127	8.86367	0.301972	3.55483
2000	945	28.931	62.9803	0.103005	10.1321	2.03114	0	7.74932	0.619149	0.589753	2.90839	8.9448	0.307204	3.63486
2000	940	28.3046	63.306	0.0919836	9.94792	2.01094	0	7.56667	0.617642	0.549153	2.8572	9.02482	0.312407	3.7153
2000	935	27.702	63.6289	0.0819425	9.7638	1.98986	0	7.38379	0.615903	0.510744	2.80759	9.10375	0.317578	3.79612
2000	930	27.122	63.9492	0.0728115	9.57976	1.96791	0	7.20089	0.613965	0.474442	2.75945	9.18161	0.322714	3.87729
2000	925	26.5637	64.2666	0.0645248	9.39589	1.94512	0	7.01818	0.611862	0.440166	2.71268	9.25839	0.327814	3.95879
2000	920	26.0261	64.5812	0.0570204	9.21223	1.92151	0	6.83587	0.609625	0.407836	2.66718	9.3341	0.332874	4.04056
2000	915	25.5083	64.8929	0.05024	9.02885	1.89711	0	6.65418	0.607288	0.377374	2.62287	9.40873	0.337891	4.12258
2000	910	25.0095	65.2016	0.0441287	8.84582	1.87195	0	6.47332	0.60488	0.348701	2.57966	9.48227	0.342863	4.20481
2000	905	24.5288	65.5072	0.0386349	8.6632	1.84606	0	6.2935	0.602432	0.321743	2.53748	9.55473	0.347787	4.2872
2000	900	24.0656	65.8097	0.0337102	8.48105	1.81948	0	6.11494	0.599973	0.296424	2.49626	9.62608	0.352658	4.36972
Title:
liquid_0	thermodynamic	data	and	composition:
Pressure	Temperature	mass	S	H	V	Cp	viscosity	SiO2	TiO2	Al2O3	Fe2O3	Cr2O3	FeO	MnO	MgO	CaO	Na2O	K2O	H2O	Mg#
2000	1500	99.9906	306.052	-1.19676e+06	40.6024	149.442	1.584	55.3327	0.144645	16.8307	1.20189	0.000107894	6.74269	0.21034	5.33613	8.20452	4.83979	0.104815	1.0517	58.5
2000	1500	99.9906	306.052	-1.19676e+06	40.6024	149.442	1.584	55.3327	0.144645	16.8307	1.20189	0.000107894	6.74269	0.21034	5.33613	8.20452	4.83979	0.104815	1.0517	58.5
2000	1495	99.9906	305.63	-1.19751e+06	40.5849	149.44	1.601	55.3327	0.144645	16.8307	1.20197	0.000107894	6.74263	0.21034	5.33613	8.20452	4.83979	0.104815	1.0517	58.5
2000	1490	99.9906	305.206	-1.19826e+06	40.5674	149.437	1.618	55.3327	0.144645	16.8307	1.20207	0.000107894	6.74253	0.21034	5.33613	8.20452	4.83979	0.104815	1.0517	58.5
2000	1485	99.9907	304.782	-1.19901e+06	40.5499	149.435	1.635	55.3327	0.144645	16.8307	1.2022	0.000107894	6.74241	0.21034	5.33613	8.20452	4.83979	0.104815	1.0517	58.5
2000	1480	99.9907	304.357	-1.19975e+06	40.5324	149.432	1.652	55.3327	0.144644	16.8307	1.20236	0.000107894	6.74226	0.21034	5.33613	8.20452	4.83979	0.104815	1.0517	58.5
2000	1475	99.9907	303.93	-1.2005e+06	40.5149	149.43	1.669	55.3327	0.144644	16.8307	1.20256	0.000107894	6.74209	0.21034	5.33613	8.20451	4.83979	0.104815	1.0517	58.5
2000	1470	99.9907	303.502	-1.20125e+06	40.4974	149.427	1.687	55.3326	0.144644	16.8307	1.20278	0.000107894	6.74189	0.21034	5.33613	8.20451	4.83979	0.104815	1.0517	58.5
2000	1465	99.9907	303.073	-1.202e+06	40.4799	149.425	1.704	55.3326	0.144644	16.8307	1.20303	0.000107894	6.74166	0.210339	5.33612	8.20451	4.83979	0.104815	1.0517	58.5
2000	1460	99.9908	302.642	-1.20274e+06	40.4624	149.422	1.721	55.3326	0.144644	16.8307	1.20331	0.000107894	6.7414	0.210339	5.33612	8.20451	4.83979	0.104815	1.0517	58.5
2000	1455	99.9908	302.211	-1.20349e+06	40.4449	149.42	1.739	55.3326	0.144644	16.8306	1.20362	0.000107894	6.74112	0.210339	5.33612	8.2045	4.83979	0.104815	1.0517	58.5
2000	1450	99.9908	301.778	-1.20424e+06	40.4274	149.418	1.757	55.3326	0.144644	16.8306	1.20397	0.000107894	6.74081	0.210339	5.33612	8.2045	4.83978	0.104815	1.0517	58.5
2000	1445	99.9909	301.344	-1.20499e+06	40.4099	149.415	1.775	55.3326	0.144644	16.8306	1.20434	0.000107894	6.74047	0.210339	5.33612	8.2045	4.83978	0.104815	1.0517	58.5
2000	1440	99.9909	300.908	-1.20573e+06	40.3925	149.413	1.792	55.3325	0.144644	16.8306	1.20475	0.000107894	6.7401	0.210339	5.33612	8.2045	4.83978	0.104815	1.0517	58.5
2000	1435	99.991	300.472	-1.20648e+06	40.375	149.411	1.81	55.3325	0.144644	16.8306	1.20519	0.000107894	6.7397	0.210339	5.33611	8.20449	4.83978	0.104814	1.0517	58.5
2000	1430	99.991	300.034	-1.20723e+06	40.3576	149.408	1.829	55.3325	0.144644	16.8306	1.20566	0.000107894	6.73927	0.210339	5.33611	8.20449	4.83978	0.104814	1.05169	58.5
2000	1425	99.9911	299.595	-1.20798e+06	40.3401	149.406	1.847	55.3325	0.144644	16.8306	1.20616	0.000107894	6.73881	0.210339	5.33611	8.20448	4.83977	0.104814	1.05169	58.5
2000	1420	99.9911	299.154	-1.20872e+06	40.3227	149.404	1.865	55.3324	0.144644	16.8306	1.2067	0.000107894	6.73833	0.210339	5.3361	8.20448	4.83977	0.104814	1.05169	58.5
2000	1415	99.9912	298.713	-1.20947e+06	40.3052	149.402	1.884	55.3324	0.144644	16.8306	1.20728	0.000107894	6.73781	0.210339	5.3361	8.20447	4.83977	0.104814	1.05169	58.5
2000	1410	99.9912	298.27	-1.21022e+06	40.2878	149.399	1.902	55.3324	0.144644	16.8306	1.20788	0.000107893	6.73725	0.210338	5.3361	8.20447	4.83977	0.104814	1.05169	58.5
2000	1405	99.9913	297.825	-1.21097e+06	40.2704	149.397	1.921	55.3323	0.144644	16.8306	1.20852	0.000107893	6.73667	0.210338	5.33609	8.20446	4.83976	0.104814	1.05169	58.5
2000	1400	99.9914	297.38	-1.21172e+06	40.253	149.395	1.94	55.3323	0.144644	16.8306	1.2092	0.000107893	6.73606	0.210338	5.33609	8.20446	4.83976	0.104814	1.05169	58.5
2000	1395	99.9914	296.933	-1.21246e+06	40.2356	149.393	1.958	55.3322	0.144643	16.8305	1.20991	0.000107893	6.73541	0.210338	5.33609	8.20445	4.83976	0.104814	1.05169	58.5
2000	1390	99.9915	296.485	-1.21321e+06	40.2182	149.391	1.977	55.3322	0.144643	16.8305	1.21066	0.000107893	6.73473	0.210338	5.33608	8.20445	4.83975	0.104814	1.05169	58.5
2000	1385	99.9916	296.035	-1.21396e+06	40.2008	149.389	1.997	55.3322	0.144643	16.8305	1.21145	0.000107893	6.73402	0.210338	5.33608	8.20444	4.83975	0.104814	1.05169	58.5
2000	1380	99.9917	295.584	-1.21471e+06	40.1834	149.387	2.016	55.3321	0.144643	16.8305	1.21227	0.000107893	6.73327	0.210338	5.33607	8.20443	4.83974	0.104814	1.05169	58.6
2000	1375	99.9917	295.132	-1.21546e+06	40.166	149.385	2.035	55.3321	0.144643	16.8305	1.21313	0.000107893	6.73249	0.210337	5.33607	8.20443	4.83974	0.104814	1.05169	58.6
2000	1370	99.9918	294.678	-1.2162e+06	40.1487	149.383	2.055	55.332	0.144643	16.8305	1.21403	0.000107893	6.73168	0.210337	5.33607	8.20442	4.83974	0.104814	1.05169	58.6
2000	1365	99.9919	294.223	-1.21695e+06	40.1313	149.381	2.074	55.332	0.144643	16.8305	1.21497	0.000107893	6.73082	0.210337	5.33606	8.20441	4.83973	0.104813	1.05168	58.6
2000	1360	99.992	293.767	-1.2177e+06	40.114	149.379	2.094	55.3319	0.144643	16.8304	1.21594	0.000107893	6.72994	0.210337	5.33606	8.2044	4.83973	0.104813	1.05168	58.6
2000	1355	99.9921	293.309	-1.21845e+06	40.0966	149.377	2.114	55.3319	0.144642	16.8304	1.21696	0.000107892	6.72902	0.210337	5.33605	8.2044	4.83972	0.104813	1.05168	58.6
2000	1350	99.9922	292.85	-1.2192e+06	40.0793	149.375	2.134	55.3318	0.144642	16.8304	1.21801	0.000107892	6.72806	0.210336	5.33604	8.20439	4.83972	0.104813	1.05168	58.6
2000	1345	99.9923	292.389	-1.21995e+06	40.0619	149.373	2.154	55.3317	0.144642	16.8304	1.21911	0.000107892	6.72706	0.210336	5.33604	8.20438	4.83971	0.104813	1.05168	58.6
2000	1340	99.9925	291.927	-1.22069e+06	40.0446	149.371	2.174	55.3317	0.144642	16.8304	1.22025	0.000107892	6.72603	0.210336	5.33603	8.20437	4.8397	0.104813	1.05168	58.6
2000	1335	99.9926	291.464	-1.22144e+06	40.0273	149.369	2.194	55.3316	0.144642	16.8303	1.22143	0.000107892	6.72496	0.210336	5.33603	8.20436	4.8397	0.104813	1.05168	58.6
2000	1330	99.9927	290.999	-1.22219e+06	40.01	149.367	2.215	55.3315	0.144642	16.8303	1.22265	0.000107892	6.72385	0.210335	5.33602	8.20435	4.83969	0.104813	1.05168	58.6
2000	1325	99.9928	290.533	-1.22294e+06	39.9927	149.365	2.235	55.3315	0.144641	16.8303	1.22392	0.000107892	6.7227	0.210335	5.33601	8.20434	4.83969	0.104813	1.05168	58.6
2000	1320	99.993	290.065	-1.22369e+06	39.9754	149.364	2.256	55.3314	0.144641	16.8303	1.22523	0.000107892	6.72151	0.210335	5.33601	8.20433	4.83968	0.104812	1.05167	58.6
2000	1315	99.9931	289.596	-1.22444e+06	39.9581	149.362	2.277	55.3313	0.144641	16.8303	1.22658	0.000107891	6.72028	0.210335	5.336	8.20432	4.83967	0.104812	1.05167	58.6
2000	1310	99.9932	289.125	-1.22519e+06	39.9409	149.36	2.298	55.3312	0.144641	16.8302	1.22798	0.000107891	6.71901	0.210334	5.33599	8.2043	4.83967	0.104812	1.05167	58.6
2000	1305	99.9934	288.653	-1.22594e+06	39.9236	149.359	2.319	55.3312	0.144641	16.8302	1.22943	0.000107891	6.7177	0.210334	5.33598	8.20429	4.83966	0.104812	1.05167	58.6
2000	1300	99.9935	288.179	-1.22668e+06	39.9064	149.357	2.34	55.3311	0.14464	16.8302	1.23092	0.000107891	6.71634	0.210334	5.33598	8.20428	4.83965	0.104812	1.05167	58.6
2000	1295	99.9937	287.704	-1.22743e+06	39.8891	149.355	2.361	55.331	0.14464	16.8302	1.23246	0.000107891	6.71495	0.210333	5.33597	8.20427	4.83965	0.104812	1.05167	58.6
2000	1290	99.9938	287.227	-1.22818e+06	39.8719	149.354	2.383	55.3309	0.14464	16.8301	1.23405	0.000107891	6.71351	0.210333	5.33596	8.20425	4.83964	0.104811	1.05166	58.6
2000	1285	99.994	286.749	-1.22893e+06	39.8547	149.352	2.405	55.3308	0.14464	16.8301	1.23568	0.00010789	6.71202	0.210333	5.33595	8.20424	4.83963	0.104811	1.05166	58.6
2000	1280	99.9942	286.27	-1.22968e+06	39.8375	149.351	2.426	55.3307	0.144639	16.8301	1.23736	0.00010789	6.7105	0.210332	5.33594	8.20423	4.83962	0.104811	1.05166	58.6
2000	1275	99.9944	285.788	-1.23043e+06	39.8203	149.349	2.448	55.3306	0.144639	16.8301	1.2391	0.00010789	6.70892	0.210332	5.33593	8.20421	4.83961	0.104811	1.05166	58.6
2000	1270	99.9945	285.306	-1.23118e+06	39.8031	149.348	2.47	55.3305	0.144639	16.83	1.24088	0.00010789	6.7073	0.210331	5.33592	8.2042	4.8396	0.104811	1.05166	58.6
2000	1265	99.9947	284.821	-1.23193e+06	39.7859	149.346	2.493	55.3304	0.144639	16.83	1.24272	0.00010789	6.70564	0.210331	5.33591	8.20418	4.8396	0.104811	1.05166	58.7
2000	1260	99.9949	284.335	-1.23268e+06	39.7687	149.345	2.515	55.3303	0.144638	16.83	1.24461	0.000107889	6.70392	0.210331	5.3359	8.20417	4.83959	0.10481	1.05165	58.7
2000	1255	99.9951	283.848	-1.23343e+06	39.7516	149.343	2.537	55.3302	0.144638	16.8299	1.24655	0.000107889	6.70216	0.21033	5.33589	8.20415	4.83958	0.10481	1.05165	58.7
2000	1250	99.9953	283.359	-1.23418e+06	39.7344	149.342	2.56	55.3301	0.144638	16.8299	1.24854	0.000107889	6.70035	0.21033	5.33588	8.20414	4.83957	0.10481	1.05165	58.7
2000	1245	99.9955	282.868	-1.23493e+06	39.7173	149.341	2.583	55.33	0.144637	16.8299	1.25059	0.000107889	6.69849	0.210329	5.33587	8.20412	4.83956	0.10481	1.05165	58.7
2000	1240	99.9957	282.376	-1.23568e+06	39.7002	149.339	2.606	55.3299	0.144637	16.8298	1.2527	0.000107889	6.69658	0.210329	5.33586	8.2041	4.83955	0.104809	1.05165	58.7
2000	1235	99.9959	281.882	-1.23643e+06	39.683	149.338	2.629	55.3297	0.144637	16.8298	1.25486	0.000107888	6.69461	0.210329	5.33585	8.20408	4.83954	0.104809	1.05164	58.7
2000	1230	99.9962	281.387	-1.23718e+06	39.6659	149.337	2.652	55.3296	0.144637	16.8297	1.25708	0.000107888	6.6926	0.210328	5.33584	8.20406	4.83953	0.104809	1.05164	58.7
2000	1225	99.9964	280.89	-1.23793e+06	39.6488	149.336	2.675	55.3295	0.144636	16.8297	1.25936	0.000107888	6.69053	0.210328	5.33582	8.20405	4.83952	0.104809	1.05164	58.7
2000	1220	99.9966	280.391	-1.23868e+06	39.6318	149.334	2.699	55.3294	0.144636	16.8297	1.26169	0.000107888	6.68841	0.210327	5.33581	8.20403	4.8395	0.104809	1.05164	58.7
2000	1215	99.9969	279.89	-1.23943e+06	39.6147	149.333	2.723	55.3292	0.144636	16.8296	1.26409	0.000107887	6.68624	0.210327	5.3358	8.20401	4.83949	0.104808	1.05163	58.7
2000	1210	99.9971	279.388	-1.24018e+06	39.5976	149.332	2.747	55.3291	0.144635	16.8296	1.26655	0.000107887	6.68401	0.210326	5.33578	8.20399	4.83948	0.104808	1.05163	58.7
2000	1205	99.9974	278.89	-1.24092e+06	39.5806	144.703	2.771	55.329	0.144635	16.8295	1.26907	0.000107887	6.68172	0.210326	5.33577	8.20397	4.83947	0.104808	1.05163	58.7
2000	1200	99.9976	278.4	-1.24165e+06	39.5636	144.696	2.795	55.3288	0.144634	16.8295	1.27165	0.000107887	6.67937	0.210325	5.33576	8.20395	4.83946	0.104807	1.05163	58.7
2000	1195	99.9979	277.909	-1.24237e+06	39.5465	144.69	2.819	55.3287	0.144634	16.8295	1.2743	0.000107886	6.67697	0.210324	5.33574	8.20392	4.83944	0.104807	1.05162	58.8
2000	1190	99.9982	277.416	-1.2431e+06	39.5295	144.683	2.844	55.3285	0.144634	16.8294	1.27701	0.000107886	6.67451	0.210324	5.33573	8.2039	4.83943	0.104807	1.05162	58.8
2000	1185	99.9984	276.921	-1.24383e+06	39.5125	144.676	2.869	55.3284	0.144633	16.8294	1.27979	0.000107886	6.67199	0.210323	5.33571	8.20388	4.83942	0.104807	1.05162	58.8
2000	1180	99.9987	276.425	-1.24456e+06	39.4955	144.668	2.893	55.3282	0.144633	16.8293	1.28264	0.000107885	6.6694	0.210323	5.3357	8.20385	4.8394	0.104806	1.05161	58.8
2000	1175	99.999	275.927	-1.24528e+06	39.4786	144.661	2.918	55.328	0.144632	16.8293	1.28555	0.000107885	6.66676	0.210322	5.33568	8.20383	4.83939	0.104806	1.05161	58.8
2000	1170	99.9993	275.427	-1.24601e+06	39.4616	144.654	2.944	55.3279	0.144632	16.8292	1.28854	0.000107885	6.66405	0.210321	5.33567	8.20381	4.83937	0.104806	1.05161	58.8
2000	1165	99.9996	274.925	-1.24674e+06	39.4447	144.646	2.969	55.3277	0.144632	16.8292	1.29159	0.000107884	6.66127	0.210321	5.33565	8.20378	4.83936	0.104805	1.0516	58.8
2000	1160	99.9999	274.422	-1.24747e+06	39.4277	144.638	2.995	55.3275	0.144631	16.8291	1.29472	0.000107884	6.65843	0.21032	5.33563	8.20376	4.83934	0.104805	1.0516	58.8
2000	1155	95.2001	261.269	-1.18599e+06	37.604	137.396	3.023	55.4974	0.151049	16.7148	1.32676	0.000113323	6.80925	0.220924	5.10749	7.97933	4.97857	0.109686	1.10462	57.2
2000	1150	90.7984	249.21	-1.1298e+06	35.9327	130.772	3.052	55.6699	0.157491	16.6005	1.35631	0.000118817	6.94312	0.231634	4.8896	7.76222	5.11638	0.11459	1.15817	55.7
2000	1145	86.7202	238.042	-1.07788e+06	34.3847	124.65	3.08	55.8443	0.164033	16.4813	1.38432	0.000124405	7.0634	0.242527	4.67764	7.55697	5.25326	0.11955	1.21264	54.1	Residual R-magma
2000	1140	83.0033	227.857	-1.03059e+06	32.9724	119.078	3.106	56.0143	0.17052	16.3586	1.41204	0.000129976	7.18022	0.253388	4.47478	7.35839	5.38619	0.124465	1.26694	52.6
2000	1135	79.6007	218.527	-987319	31.6781	113.985	3.132	56.1801	0.176955	16.2327	1.43951	0.000135532	7.29378	0.264219	4.28055	7.16621	5.51534	0.129337	1.32109	51.1
2000	1130	76.4734	209.947	-947575	30.4872	109.311	3.156	56.3418	0.183343	16.1038	1.46677	0.000141074	7.40432	0.275024	4.09454	6.98018	5.64083	0.134168	1.37512	49.6
2000	1125	73.5886	202.026	-910932	29.3873	105.005	3.179	56.4994	0.189689	15.9718	1.49386	0.000146604	7.51204	0.285805	3.91634	6.80005	5.7628	0.138958	1.42903	48.2
2000	1120	70.9182	194.69	-877032	28.368	101.026	3.202	56.6531	0.195997	15.8372	1.52081	0.000152124	7.61712	0.296567	3.74557	6.62558	5.88138	0.14371	1.48283	46.7
2000	1115	68.4386	187.873	-845570	27.4204	97.3357	3.223	56.8029	0.202272	15.6999	1.54767	0.000157636	7.71974	0.307312	3.58186	6.45655	5.99668	0.148423	1.53656	45.3
2000	1110	66.1291	181.52	-816281	26.5368	93.904	3.243	56.9489	0.208518	15.5601	1.57445	0.000163141	7.82004	0.318045	3.42489	6.29275	6.10883	0.1531	1.59022	43.8
2000	1105	63.9722	175.583	-788941	25.7104	90.7037	3.262	57.0911	0.214739	15.418	1.60119	0.000168642	7.91817	0.328768	3.27431	6.13397	6.21795	0.157742	1.64384	42.4
2000	1100	61.9525	170.02	-763352	24.9357	87.7114	3.281	57.2298	0.220939	15.2737	1.62791	0.00017414	8.01425	0.339486	3.12984	5.98001	6.32413	0.16235	1.69743	41
2000	1095	60.0566	164.796	-739345	24.2075	84.9067	3.298	57.3648	0.227121	15.1274	1.65463	0.000179637	8.10838	0.350203	2.99116	5.83069	6.42749	0.166925	1.75101	39.7
2000	1090	58.2731	159.877	-716769	23.5216	82.2719	3.314	57.4965	0.233291	14.979	1.68138	0.000185135	8.20068	0.360922	2.85801	5.68583	6.52813	0.171469	1.80461	38.3
2000	1085	56.5914	155.238	-695494	22.874	79.7913	3.33	57.6247	0.239452	14.8288	1.70817	0.000190637	8.29123	0.371646	2.73014	5.54525	6.62615	0.175982	1.85823	37
2000	1080	55.0028	150.852	-675403	22.2614	77.4512	3.344	57.7497	0.245606	14.6769	1.73502	0.000196143	8.38011	0.382381	2.60729	5.4088	6.72164	0.180466	1.9119	35.7
2000	1075	53.499	146.698	-656396	21.6808	75.2395	3.358	57.8714	0.251758	14.5234	1.76196	0.000201656	8.46738	0.393129	2.48923	5.27633	6.8147	0.184922	1.96564	34.4
2000	1070	52.0731	142.758	-638380	21.1295	73.1452	3.371	57.99	0.257911	14.3683	1.78898	0.000207178	8.55312	0.403894	2.37574	5.14767	6.90542	0.18935	2.01947	33.1
2000	1065	50.7187	139.013	-621276	20.6052	71.1588	3.383	58.1055	0.264068	14.2117	1.81612	0.00021271	8.63736	0.414679	2.26662	5.02269	6.99388	0.193752	2.0734	31.9
2000	1060	49.4302	135.449	-605011	20.1057	69.2717	3.394	58.218	0.270232	14.0538	1.84338	0.000218255	8.72015	0.425489	2.16167	4.90125	7.08016	0.198128	2.12745	30.6
2000	1055	48.2024	132.051	-589520	19.6291	67.4762	3.404	58.3277	0.276406	13.8947	1.87077	0.000223815	8.80152	0.436327	2.06071	4.78322	7.16435	0.202478	2.18163	29.4
2000	1050	47.0309	128.807	-574746	19.1738	65.7653	3.414	58.4345	0.282594	13.7343	1.8983	0.00022939	8.8815	0.447196	1.96355	4.66848	7.24653	0.206805	2.23598	28.3
2000	1045	45.9114	125.707	-560636	18.7381	64.1328	3.423	58.5386	0.288796	13.5729	1.92599	0.000234983	8.96011	0.458099	1.87003	4.5569	7.32677	0.211107	2.2905	27.1
2000	1040	44.8404	122.739	-547142	18.3208	62.5731	3.431	58.6399	0.295016	13.4105	1.95383	0.000240595	9.03736	0.469041	1.78	4.44837	7.40515	0.215387	2.3452	26
2000	1035	43.8145	119.896	-534223	17.9205	61.0811	3.438	58.7387	0.301257	13.2471	1.98184	0.000246229	9.11325	0.480024	1.6933	4.34278	7.48174	0.219643	2.40012	24.9
2000	1030	42.8305	117.167	-521838	17.5361	59.6522	3.445	58.835	0.30752	13.0828	2.01003	0.000251886	9.18778	0.491052	1.6098	4.24001	7.55661	0.223877	2.45526	23.8
2000	1025	41.8857	114.547	-509954	17.1665	58.2821	3.451	58.9289	0.313808	12.9177	2.03839	0.000257568	9.26094	0.502128	1.52936	4.13996	7.62983	0.228089	2.51064	22.7
2000	1020	40.9776	112.028	-498537	16.8109	56.9669	3.456	59.0204	0.320122	12.7519	2.06693	0.000263276	9.33271	0.513256	1.45186	4.04253	7.70148	0.23228	2.56628	21.7
2000	1015	40.1037	109.603	-487557	16.4682	55.7031	3.461	59.1096	0.326465	12.5854	2.09567	0.000269013	9.40309	0.524441	1.37718	3.94762	7.77162	0.23645	2.6222	20.7
2000	1010	39.2619	107.266	-476987	16.1378	54.4874	3.465	59.1967	0.332838	12.4182	2.12459	0.00027478	9.47203	0.535685	1.3052	3.85514	7.84032	0.240599	2.67842	19.7
2000	1005	38.4421	104.994	-466741	15.8167	53.306	3.469	59.2904	0.337743	12.2506	2.15237	0.000111458	9.5318	0.547109	1.2358	3.76479	7.90889	0.244776	2.73554	18.8
2000	1000	37.5782	102.625	-456319	15.4872	52.0706	3.478	59.4625	0.328254	12.0829	2.16805	8.09615e-07	9.51914	0.559685	1.16924	3.67508	7.98735	0.249374	2.79843	18
2000	995	36.6432	100.095	-445545	15.1427	50.7457	3.497	59.7538	0.298591	11.9152	2.16461	0	9.3964	0.573967	1.10631	3.5856	8.08108	0.254611	2.86984	17.3
2000	990	35.7414	97.6562	-435195	14.8109	49.4702	3.515	60.053	0.26903	11.7465	2.15888	0	9.26236	0.588449	1.04664	3.49879	8.17429	0.259871	2.94225	16.8
2000	985	34.8806	95.3273	-425316	14.4935	48.2539	3.532	60.348	0.241563	11.5769	2.15274	0	9.12786	0.602971	0.989955	3.41475	8.26538	0.265088	3.01485	16.2
2000	980	34.0578	93.1	-415872	14.1895	47.0924	3.548	60.6394	0.216075	11.4064	2.14611	0	8.9926	0.617539	0.936108	3.33334	8.35446	0.270263	3.08769	15.7
2000	975	33.2603	90.942	-406860	13.8976	45.9679	3.568	60.9699	0.194215	11.2332	2.13353	0	8.83	0.621495	0.884265	3.25563	8.44056	0.275439	3.16173	15.1
2000	970	32.4633	88.7927	-397869	13.6061	44.8464	3.588	61.3119	0.17558	11.0506	2.1187	0	8.65253	0.622062	0.828653	3.19229	8.52765	0.28079	3.23935	14.6
2000	965	31.6987	86.7302	-389245	13.3258	43.7718	3.606	61.651	0.158448	10.8674	2.10298	0	8.4738	0.622204	0.775782	3.13133	8.61345	0.28612	3.31749	14
2000	960	30.9647	84.75	-380967	13.0564	42.7414	3.624	61.9873	0.142716	10.6839	2.08637	0	8.29396	0.621952	0.725551	3.07261	8.69803	0.291428	3.39613	13.5
2000	955	30.2597	82.8477	-373017	12.7971	41.7528	3.64	62.321	0.12829	10.5002	2.06886	0	8.11315	0.621337	0.677864	3.01597	8.78143	0.296713	3.47525	13
2000	950	29.5823	81.0193	-365378	12.5475	40.8038	3.655	62.652	0.115081	10.3162	2.05045	0	7.93155	0.620392	0.632628	2.96127	8.86367	0.301972	3.55483	12.4
2000	945	28.931	79.261	-358034	12.3071	39.8923	3.67	62.9803	0.103005	10.1321	2.03114	0	7.74932	0.619149	0.589753	2.90839	8.9448	0.307204	3.63486	11.9
2000	940	28.3046	77.5695	-350971	12.0754	39.0165	3.683	63.306	0.0919836	9.94792	2.01094	0	7.56667	0.617642	0.549153	2.8572	9.02482	0.312407	3.7153	11.5
2000	935	27.702	75.9415	-344176	11.8522	38.1747	3.696	63.6289	0.0819425	9.7638	1.98986	0	7.38379	0.615903	0.510744	2.80759	9.10375	0.317578	3.79612	11
2000	930	27.122	74.3742	-337635	11.6369	37.3651	3.707	63.9492	0.0728115	9.57976	1.96791	0	7.20089	0.613965	0.474442	2.75945	9.18161	0.322714	3.87729	10.5
2000	925	26.5637	72.8647	-331338	11.4292	36.5864	3.717	64.2666	0.0645248	9.39589	1.94512	0	7.01818	0.611862	0.440166	2.71268	9.25839	0.327814	3.95879	10.1
2000	920	26.0261	71.4105	-325273	11.2289	35.837	3.727	64.5812	0.0570204	9.21223	1.92151	0	6.83587	0.609625	0.407836	2.66718	9.3341	0.332874	4.04056	9.6
2000	915	25.5083	70.009	-319430	11.0355	35.1157	3.735	64.8929	0.05024	9.02885	1.89711	0	6.65418	0.607288	0.377374	2.62287	9.40873	0.337891	4.12258	9.2
2000	910	25.0095	68.6581	-313799	10.8489	34.4213	3.743	65.2016	0.0441287	8.84582	1.87195	0	6.47332	0.60488	0.348701	2.57966	9.48227	0.342863	4.20481	8.8
2000	905	24.5288	67.3555	-308372	10.6687	33.7524	3.749	65.5072	0.0386349	8.6632	1.84606	0	6.2935	0.602432	0.321743	2.53748	9.55473	0.347787	4.2872	8.4
2000	900	24.0656	66.0991	-303138	10.4946	33.1081	3.755	65.8097	0.0337102	8.48105	1.81948	0	6.11494	0.599973	0.296424	2.49626	9.62608	0.352658	4.36972	8
olivine_0	thermodynamic	data	and	composition:
Pressure	Temperature	mass	S	H	V	Cp	formula	SiO2	TiO2	Al2O3	Fe2O3	Cr2O3	FeO	MnO	MgO	CaO	Na2O	K2O	H2O
2000	975	0.109429	0.228554	-954.015	0.028507	0.114776	(Ca0.01Mg0.37Fe''0.59Mn0.04Co0.00Ni0.00)2SiO4	33.2906	0	0	0	0	46.7579	3.29803	16.3153	0.338305	0	0	0
2000	970	0.14244	0.296306	-1230.4	0.036964	0.148779	(Ca0.01Mg0.36Fe''0.60Mn0.04Co0.00Ni0.00)2SiO4	33.1449	0	0	0	0	47.4631	3.37125	15.6827	0.338028	0	0	0
2000	965	0.137848	0.285603	-1179.96	0.035637	0.143392	(Ca0.01Mg0.35Fe''0.61Mn0.04Co0.00Ni0.00)2SiO4	33.0024	0	0	0	0	48.1533	3.4422	15.0644	0.337661	0	0	0
2000	960	0.133283	0.275039	-1130.72	0.034329	0.138085	(Ca0.01Mg0.33Fe''0.62Mn0.05Co0.00Ni0.00)2SiO4	32.8634	0	0	0	0	48.8274	3.5109	14.461	0.337194	0	0	0
2000	955	0.128747	0.264617	-1082.69	0.03304	0.132858	(Ca0.01Mg0.32Fe''0.63Mn0.05Co0.00Ni0.00)2SiO4	32.7279	0	0	0	0	49.4849	3.57742	13.8731	0.336615	0	0	0
2000	950	0.124242	0.25434	-1035.85	0.031771	0.127712	(Ca0.01Mg0.31Fe''0.64Mn0.05Co0.00Ni0.00)2SiO4	32.5961	0	0	0	0	50.1251	3.64183	13.301	0.33592	0	0	0
2000	945	0.119769	0.244211	-990.182	0.03052	0.122646	(Ca0.01Mg0.30Fe''0.65Mn0.05Co0.00Ni0.00)2SiO4	32.468	0	0	0	0	50.7476	3.70424	12.7451	0.335099	0	0	0
2000	940	0.11533	0.234232	-945.675	0.02929	0.117662	(Ca0.01Mg0.29Fe''0.66Mn0.05Co0.00Ni0.00)2SiO4	32.3437	0	0	0	0	51.3519	3.7648	12.2055	0.33415	0	0	0
2000	935	0.110928	0.224407	-902.312	0.028079	0.11276	(Ca0.01Mg0.28Fe''0.67Mn0.05Co0.00Ni0.00)2SiO4	32.2231	0	0	0	0	51.9378	3.82364	11.6824	0.333068	0	0	0
2000	930	0.106566	0.21474	-860.078	0.026888	0.107941	(Ca0.01Mg0.26Fe''0.68Mn0.05Co0.00Ni0.00)2SiO4	32.1063	0	0	0	0	52.5052	3.88096	11.1757	0.331851	0	0	0
2000	925	0.102246	0.205235	-818.963	0.025717	0.103207	(Ca0.01Mg0.25Fe''0.69Mn0.05Co0.00Ni0.00)2SiO4	31.9932	0	0	0	0	53.054	3.93695	10.6853	0.330497	0	0	0
2000	920	0.097972	0.195898	-778.955	0.024567	0.098558	(Ca0.01Mg0.24Fe''0.70Mn0.05Co0.00Ni0.00)2SiO4	31.8839	0	0	0	0	53.5842	3.99181	10.2111	0.329007	0	0	0
2000	915	0.093749	0.186734	-740.048	0.023439	0.093998	(Ca0.01Mg0.23Fe''0.71Mn0.05Co0.00Ni0.00)2SiO4	31.7782	0	0	0	0	54.096	4.04577	9.75271	0.32738	0	0	0
2000	910	0.08958	0.177751	-702.238	0.022332	0.08953	(Ca0.01Mg0.22Fe''0.72Mn0.05Co0.00Ni0.00)2SiO4	31.6761	0	0	0	0	54.5893	4.09908	9.30991	0.325618	0	0	0
2000	905	0.085471	0.168957	-665.525	0.021249	0.085155	(Ca0.01Mg0.22Fe''0.73Mn0.06Co0.00Ni0.00)2SiO4	31.5774	0	0	0	0	55.0645	4.15197	8.88233	0.323723	0	0	0
2000	900	0.081428	0.160358	-629.914	0.020189	0.080878	(Ca0.01Mg0.21Fe''0.74Mn0.06Co0.00Ni0.00)2SiO4	31.4822	0	0	0	0	55.5218	4.2047	8.46958	0.321697	0	0	0
clinopyroxene_0	thermodynamic	data	and	composition:
Pressure	Temperature	mass	S	H	V	Cp	structure	formula	SiO2	TiO2	Al2O3	Fe2O3	Cr2O3	FeO	MnO	MgO	CaO	Na2O	K2O	H2O
2000	1155	1.21026	2.82607	-15425.9	0.374572	1.44974	cpx	Na0.01Ca0.68Fe''0.22Mg0.98Fe'''0.03Ti0.00Al0.17Si1.90O6	52.1502	0.0573102	3.97023	1.16972	0	7.09333	0	18.0919	17.2621	0.205178	0	0
2000	1150	0.856997	1.99711	-10907.5	0.264969	1.02532	cpx	Na0.01Ca0.67Fe''0.22Mg0.98Fe'''0.03Ti0.00Al0.17Si1.90O6	52.0949	0.0618783	3.96326	1.19487	0	7.2921	0	17.9659	17.2173	0.209773	0	0
2000	1145	0.547707	1.27357	-6962.44	0.169179	0.654377	cpx	Na0.02Ca0.68Fe''0.23Mg0.97Fe'''0.03Ti0.00Al0.17Si1.90O6	52.0332	0.0671336	3.96123	1.22208	0	7.45489	0	17.8042	17.2423	0.215035	0	0
2000	1140	0.471182	1.09321	-5982.25	0.145401	0.562162	cpx	Na0.02Ca0.68Fe''0.23Mg0.96Fe'''0.03Ti0.00Al0.17Si1.90O6	51.9707	0.0726863	3.95942	1.24961	0	7.6171	0	17.6406	17.2695	0.220398	0	0
2000	1135	0.405828	0.939494	-5146.1	0.125112	0.483506	cpx	Na0.02Ca0.68Fe''0.24Mg0.95Fe'''0.04Ti0.00Al0.17Si1.90O6	51.9075	0.078554	3.9578	1.27751	0	7.77892	0	17.4751	17.2987	0.22587	0	0
2000	1130	0.350093	0.808658	-4433.81	0.107824	0.416509	cpx	Na0.02Ca0.68Fe''0.24Mg0.95Fe'''0.04Ti0.00Al0.17Si1.90O6	51.8435	0.084756	3.95639	1.30583	0	7.94053	0	17.3078	17.3297	0.231457	0	0
2000	1125	0.30239	0.696902	-3824.84	0.093041	0.359239	cpx	Na0.02Ca0.68Fe''0.25Mg0.94Fe'''0.04Ti0.00Al0.17Si1.90O6	51.7786	0.091313	3.9552	1.33463	0	8.10215	0	17.1386	17.3624	0.237166	0	0
2000	1120	0.261432	0.601145	-3302.57	0.08036	0.310129	cpx	Na0.02Ca0.69Fe''0.25Mg0.93Fe'''0.04Ti0.00Al0.17Si1.90O6	51.7127	0.0982476	3.95422	1.36395	0	8.26396	0	16.9674	17.3965	0.243003	0	0
2000	1115	0.226167	0.51887	-2853.41	0.069451	0.2679	cpx	Na0.02Ca0.69Fe''0.26Mg0.92Fe'''0.04Ti0.00Al0.17Si1.90O6	51.6458	0.105585	3.95348	1.39386	0	8.42617	0	16.7942	17.432	0.248973	0	0
2000	1110	0.195729	0.448011	-2466.18	0.060044	0.231501	cpx	Na0.02Ca0.69Fe''0.26Mg0.91Fe'''0.04Ti0.00Al0.17Si1.90O6	51.5777	0.113351	3.95297	1.42442	0	8.58899	0	16.6189	17.4686	0.255084	0	0
2000	1105	0.169403	0.386857	-2131.66	0.051916	0.200062	cpx	Na0.02Ca0.69Fe''0.27Mg0.90Fe'''0.04Ti0.00Al0.17Si1.90O6	51.5084	0.121575	3.95271	1.45568	0	8.75261	0	16.4415	17.5062	0.261341	0	0
2000	1100	0.146593	0.333988	-1842.15	0.044879	0.172859	cpx	Na0.02Ca0.69Fe''0.28Mg0.90Fe'''0.04Ti0.00Al0.17Si1.90O6	51.4378	0.130289	3.95273	1.48771	0	8.91726	0	16.2618	17.5446	0.267751	0	0
2000	1095	0.126799	0.288215	-1591.24	0.038779	0.149288	cpx	Na0.02Ca0.70Fe''0.28Mg0.89Fe'''0.04Ti0.00Al0.17Si1.90O6	51.3657	0.139528	3.95303	1.52058	0	9.08315	0	16.0799	17.5838	0.274321	0	0
2000	1090	0.109602	0.248539	-1373.52	0.033485	0.128839	cpx	Na0.02Ca0.70Fe''0.29Mg0.88Fe'''0.04Ti0.00Al0.17Si1.90O6	51.2921	0.14933	3.95364	1.55436	0	9.2505	0	15.8955	17.6235	0.281057	0	0
2000	1085	0.094648	0.214119	-1184.43	0.028886	0.111084	cpx	Na0.02Ca0.70Fe''0.29Mg0.87Fe'''0.04Ti0.00Al0.17Si1.90O6	51.2168	0.159736	3.95458	1.58912	0	9.41954	0	15.7085	17.6637	0.287968	0	0
2000	1080	0.081636	0.184242	-1020.12	0.024888	0.095658	cpx	Na0.02Ca0.70Fe''0.30Mg0.86Fe'''0.05Ti0.00Al0.17Si1.90O6	51.1397	0.170791	3.95587	1.62495	0	9.59049	0	15.5189	17.7042	0.29506	0	0
2000	1075	0.070311	0.1583	-877.289	0.021412	0.082253	cpx	Na0.02Ca0.71Fe''0.30Mg0.85Fe'''0.05Ti0.01Al0.17Si1.90O6	51.0606	0.182546	3.95755	1.66194	0	9.76361	0	15.3264	17.7449	0.302342	0	0
2000	1070	0.060453	0.135777	-753.146	0.01839	0.070604	cpx	Na0.02Ca0.71Fe''0.31Mg0.84Fe'''0.05Ti0.01Al0.17Si1.90O6	50.9794	0.195056	3.95965	1.70018	0	9.93912	0	15.131	17.7857	0.309823	0	0
2000	1065	0.051877	0.11623	-645.284	0.015763	0.060486	cpx	Na0.02Ca0.71Fe''0.31Mg0.83Fe'''0.05Ti0.01Al0.17Si1.89O6	50.8959	0.20838	3.96219	1.73977	0	10.1173	0	14.9325	17.8265	0.317512	0	0
2000	1060	0.04442	0.099278	-551.641	0.013482	0.051703	cpx	Na0.02Ca0.71Fe''0.32Mg0.82Fe'''0.05Ti0.01Al0.17Si1.89O6	50.8099	0.222585	3.96522	1.78082	0	10.2984	0	14.7306	17.8671	0.325418	0	0
2000	1055	0.037944	0.084595	-470.441	0.011503	0.044089	cpx	Na0.02Ca0.72Fe''0.33Mg0.81Fe'''0.05Ti0.01Al0.17Si1.89O6	50.7211	0.237746	3.96878	1.82346	0	10.4826	0	14.5252	17.9075	0.333553	0	0
2000	1050	0.03233	0.071899	-400.15	0.009789	0.037499	cpx	Na0.02Ca0.72Fe''0.33Mg0.80Fe'''0.05Ti0.01Al0.17Si1.89O6	50.6295	0.253944	3.97292	1.8678	0	10.6703	0	14.3161	17.9475	0.341927	0	0
2000	1045	0.027474	0.060945	-339.442	0.008309	0.031809	cpx	Na0.03Ca0.72Fe''0.34Mg0.79Fe'''0.05Ti0.01Al0.18Si1.89O6	50.5347	0.271271	3.97769	1.91399	0	10.8617	0	14.103	17.9871	0.350553	0	0
2000	1040	0.023285	0.051523	-287.169	0.007033	0.02691	cpx	Na0.03Ca0.72Fe''0.35Mg0.78Fe'''0.06Ti0.01Al0.18Si1.89O6	50.4365	0.289828	3.98314	1.9622	0	11.0571	0	13.8857	18.0261	0.359444	0	0
2000	1035	0.019687	0.04345	-242.334	0.005939	0.022709	cpx	Na0.03Ca0.73Fe''0.35Mg0.76Fe'''0.06Ti0.01Al0.18Si1.89O6	50.3346	0.309729	3.98933	2.01257	0	11.2568	0	13.6638	18.0646	0.368613	0	0
2000	1030	0.016611	0.036567	-204.073	0.005004	0.019124	cpx	Na0.03Ca0.73Fe''0.36Mg0.75Fe'''0.06Ti0.01Al0.18Si1.89O6	50.2286	0.331103	3.99634	2.06531	0	11.4611	0	13.4372	18.1023	0.378077	0	0
2000	1025	0.013999	0.030737	-171.634	0.004212	0.016086	cpx	Na0.03Ca0.73Fe''0.37Mg0.74Fe'''0.06Ti0.01Al0.18Si1.89O6	50.1183	0.354093	4.00425	2.12061	0	11.6702	0	13.2055	18.1393	0.387851	0	0
2000	1020	0.011786	0.02581	-144.199	0.003541	0.013516	cpx	Na0.03Ca0.73Fe''0.37Mg0.73Fe'''0.06Ti0.01Al0.18Si1.88O6	50.0032	0.378863	4.01313	2.1787	0	11.8844	0	12.9684	18.1754	0.397953	0	0
2000	1015	0.009912	0.021648	-120.999	0.002974	0.011343	cpx	Na0.03Ca0.74Fe''0.38Mg0.72Fe'''0.06Ti0.01Al0.18Si1.88O6	49.8829	0.405599	4.02306	2.23981	0	12.1042	0	12.7254	18.2106	0.408401	0	0
2000	1010	0.008371	0.018233	-101.951	0.002508	0.009559	cpx	Na0.03Ca0.74Fe''0.39Mg0.70Fe'''0.07Ti0.01Al0.18Si1.88O6	49.7571	0.434513	4.03416	2.30422	0	12.3296	0	12.4763	18.2449	0.419216	0	0
2000	1005	0.008296	0.018022	-100.804	0.002482	0.009454	cpx	Na0.03Ca0.74Fe''0.40Mg0.69Fe'''0.07Ti0.01Al0.18Si1.88O6	49.6307	0.463413	4.04369	2.36996	0	12.5598	0	12.2254	18.2768	0.430221	0	0
2000	1000	0.016516	0.035782	-200.256	0.004934	0.018786	cpx	Na0.03Ca0.74Fe''0.41Mg0.68Fe'''0.07Ti0.01Al0.18Si1.88O6	49.5536	0.469935	4.02625	2.41688	0	12.7878	0	12.0132	18.2928	0.439628	0	0
2000	995	0.028245	0.061038	-341.911	0.008431	0.032079	cpx	Na0.03Ca0.74Fe''0.41Mg0.67Fe'''0.07Ti0.01Al0.18Si1.88O6	49.5572	0.440641	3.96719	2.43101	0	13.005	0	11.8665	18.2862	0.446232	0	0
2000	990	0.026246	0.056575	-317.204	0.007827	0.029766	cpx	Na0.03Ca0.74Fe''0.42Mg0.66Fe'''0.07Ti0.01Al0.17Si1.88O6	49.5666	0.408815	3.90502	2.4423	0	13.2232	0	11.724	18.2774	0.452656	0	0
2000	985	0.023335	0.050172	-281.564	0.006953	0.026426	cpx	Na0.03Ca0.74Fe''0.43Mg0.66Fe'''0.07Ti0.01Al0.17Si1.88O6	49.5735	0.378053	3.84389	2.45418	0	13.4441	0	11.5787	18.2683	0.459198	0	0
2000	980	0.020971	0.044972	-252.613	0.006243	0.023713	cpx	Na0.03Ca0.74Fe''0.44Mg0.65Fe'''0.07Ti0.01Al0.17Si1.89O6	49.578	0.348344	3.78373	2.46663	0	13.6678	0	11.4306	18.259	0.46586	0	0
2000	975	0.045418	0.097145	-546.203	0.013508	0.05128	cpx	Na0.03Ca0.75Fe''0.44Mg0.64Fe'''0.07Ti0.01Al0.17Si1.89O6	49.5808	0.322751	3.72342	2.477	0	13.8855	0	11.2832	18.2548	0.47248	0	0
2000	970	0.011971	0.025533	-143.773	0.003557	0.013493	cpx	Na0.04Ca0.75Fe''0.45Mg0.63Fe'''0.07Ti0.01Al0.17Si1.89O6	49.5578	0.306136	3.67893	2.50556	0	14.0388	0	11.0823	18.349	0.481471	0	0
2000	965	0.009759	0.020756	-117.044	0.002898	0.01098	cpx	Na0.04Ca0.75Fe''0.45Mg0.62Fe'''0.07Ti0.01Al0.16Si1.89O6	49.5327	0.289904	3.63499	2.53514	0	14.1984	0	10.8797	18.4386	0.490581	0	0
2000	960	0.008009	0.016984	-95.904	0.002376	0.008994	cpx	Na0.04Ca0.76Fe''0.46Mg0.61Fe'''0.07Ti0.01Al0.16Si1.89O6	49.5056	0.274053	3.59156	2.56577	0	14.3646	0	10.6753	18.5233	0.499814	0	0
2000	955	0.00665	0.014062	-79.5083	0.001971	0.007455	cpx	Na0.04Ca0.76Fe''0.47Mg0.60Fe'''0.07Ti0.01Al0.16Si1.89O6	49.4763	0.258588	3.54862	2.59746	0	14.5377	0	10.4691	18.6031	0.509176	0	0
2000	950	0.005624	0.011859	-67.1372	0.001665	0.006294	cpx	Na0.04Ca0.77Fe''0.47Mg0.59Fe'''0.08Ti0.01Al0.16Si1.90O6	49.4448	0.243513	3.50614	2.63027	0	14.7181	0	10.2609	18.6777	0.518672	0	0
2000	945	0.004882	0.010264	-58.1776	0.001444	0.005453	cpx	Na0.04Ca0.77Fe''0.48Mg0.57Fe'''0.08Ti0.01Al0.16Si1.90O6	49.411	0.228837	3.46407	2.66421	0	14.9059	0	10.0505	18.7472	0.52831	0	0
2000	940	0.00438	0.009182	-52.1055	0.001294	0.004883	cpx	Na0.04Ca0.77Fe''0.49Mg0.56Fe'''0.08Ti0.01Al0.15Si1.90O6	49.3751	0.214569	3.4224	2.69932	0	15.1012	0	9.8379	18.8115	0.538097	0	0
2000	935	0.004083	0.008533	-48.4722	0.001205	0.004543	cpx	Na0.04Ca0.78Fe''0.49Mg0.55Fe'''0.08Ti0.01Al0.15Si1.90O6	49.3367	0.20072	3.38107	2.73562	0	15.3043	0	9.62297	18.8706	0.548039	0	0
2000	930	0.003957	0.008246	-46.8928	0.001167	0.004395	cpx	Na0.04Ca0.78Fe''0.50Mg0.54Fe'''0.08Ti0.01Al0.15Si1.90O6	49.2961	0.1873	3.34007	2.77314	0	15.5151	0	9.40562	18.9245	0.558144	0	0
2000	925	0.003978	0.008264	-47.0361	0.001171	0.004408	cpx	Na0.04Ca0.78Fe''0.51Mg0.53Fe'''0.08Ti0.01Al0.15Si1.90O6	49.2532	0.174319	3.29935	2.8119	0	15.7337	0	9.18577	18.9734	0.56842	0	0
2000	920	0.00412	0.008534	-48.6166	0.001212	0.004557	cpx	Na0.04Ca0.79Fe''0.52Mg0.52Fe'''0.08Ti0.00Al0.15Si1.90O6	49.2079	0.161791	3.25888	2.85192	0	15.96	0	8.9634	19.0172	0.578873	0	0
2000	915	0.004364	0.009013	-51.3873	0.001282	0.004818	cpx	Na0.04Ca0.79Fe''0.52Mg0.50Fe'''0.08Ti0.00Al0.15Si1.90O6	49.1603	0.149725	3.2186	2.8932	0	16.1941	0	8.73846	19.0561	0.58951	0	0
2000	910	0.004693	0.009663	-55.1338	0.001377	0.00517	cpx	Na0.05Ca0.79Fe''0.53Mg0.49Fe'''0.09Ti0.00Al0.15Si1.90O6	49.1104	0.138132	3.17849	2.93575	0	16.4358	0	8.51097	19.0901	0.600337	0	0
2000	905	0.005091	0.01045	-59.6692	0.001492	0.005597	cpx	Na0.05Ca0.80Fe''0.54Mg0.48Fe'''0.09Ti0.00Al0.14Si1.90O6	49.0583	0.127026	3.13849	2.97956	0	16.6849	0	8.28096	19.1194	0.611359	0	0
2000	900	0.005545	0.011347	-64.8295	0.001623	0.006084	cpx	Na0.05Ca0.80Fe''0.55Mg0.47Fe'''0.09Ti0.00Al0.14Si1.90O6	49.004	0.116415	3.09858	3.02461	0	16.9412	0	8.04849	19.1441	0.622582	0	0
clinopyroxene_1	thermodynamic	data	and	composition:
Pressure	Temperature	mass	S	H	V	Cp	structure	formula	SiO2	TiO2	Al2O3	Fe2O3	Cr2O3	FeO	MnO	MgO	CaO	Na2O	K2O	H2O
2000	1150	0.727968	1.72944	-9043.5	0.223875	0.89205	cpx	Na0.01Ca0.27Fe''0.36Mg1.28Fe'''0.02Ti0.00Al0.14Si1.92O6	53.1426	0.0294869	3.20249	0.908348	0	12.0042	0	23.7123	6.90225	0.0983222	0	0
2000	1145	1.21906	2.88936	-15108.4	0.374374	1.49117	cpx	Na0.01Ca0.27Fe''0.37Mg1.27Fe'''0.03Ti0.00Al0.14Si1.92O6	53.0593	0.0313963	3.1949	0.925608	0	12.3112	0	23.4935	6.88389	0.100179	0	0
2000	1140	1.11512	2.63679	-13787	0.341967	1.36158	cpx	Na0.01Ca0.27Fe''0.38Mg1.26Fe'''0.03Ti0.00Al0.14Si1.92O6	52.9758	0.0333399	3.18706	0.942811	0	12.6218	0	23.2754	6.86183	0.101994	0	0
2000	1135	1.02507	2.41812	-12642.6	0.313899	1.24937	cpx	Na0.01Ca0.27Fe''0.39Mg1.25Fe'''0.03Ti0.00Al0.14Si1.92O6	52.892	0.0353162	3.17898	0.959986	0	12.9363	0	23.0575	6.83617	0.103767	0	0
2000	1130	0.945398	2.22489	-11631	0.289083	1.15018	cpx	Na0.01Ca0.27Fe''0.40Mg1.24Fe'''0.03Ti0.00Al0.14Si1.92O6	52.8077	0.0373234	3.17066	0.977161	0	13.255	0	22.8397	6.80705	0.105499	0	0
2000	1125	0.874533	2.0532	-10732	0.267022	1.06203	cpx	Na0.01Ca0.26Fe''0.41Mg1.23Fe'''0.03Ti0.00Al0.14Si1.92O6	52.7228	0.0393602	3.16212	0.994365	0	13.5782	0	22.6214	6.77458	0.10719	0	0
2000	1120	0.81119	1.89992	-9929.06	0.247314	0.983293	cpx	Na0.01Ca0.26Fe''0.42Mg1.22Fe'''0.03Ti0.00Al0.14Si1.92O6	52.6373	0.0414249	3.15336	1.01163	0	13.9063	0	22.4023	6.73888	0.10884	0	0
2000	1115	0.754314	1.76244	-9208.65	0.229629	0.912654	cpx	Na0.01Ca0.26Fe''0.44Mg1.21Fe'''0.03Ti0.00Al0.14Si1.92O6	52.5509	0.0435161	3.1444	1.02898	0	14.2395	0	22.1822	6.70007	0.110447	0	0
2000	1110	0.703033	1.63863	-8559.62	0.213692	0.849014	cpx	Na0.01Ca0.26Fe''0.45Mg1.20Fe'''0.03Ti0.00Al0.14Si1.92O6	52.4635	0.0456324	3.13524	1.04645	0	14.5783	0	21.9606	6.65826	0.112013	0	0
2000	1105	0.65662	1.5267	-7972.65	0.199277	0.791461	cpx	Na0.01Ca0.26Fe''0.46Mg1.19Fe'''0.03Ti0.00Al0.14Si1.92O6	52.3751	0.0477724	3.12589	1.06407	0	14.9228	0	21.7373	6.61355	0.113536	0	0
2000	1100	0.614466	1.42517	-7439.93	0.186192	0.739229	cpx	Na0.01Ca0.26Fe''0.47Mg1.18Fe'''0.03Ti0.00Al0.13Si1.92O6	52.2855	0.0499349	3.11637	1.08187	0	15.2734	0	21.5119	6.56605	0.115015	0	0
2000	1095	0.576058	1.33276	-6954.9	0.174276	0.691674	cpx	Na0.01Ca0.26Fe''0.48Mg1.17Fe'''0.03Ti0.00Al0.13Si1.92O6	52.1945	0.0521185	3.10668	1.09989	0	15.6304	0	21.284	6.51586	0.11645	0	0
2000	1090	0.540957	1.24842	-6511.95	0.163392	0.648247	cpx	Na0.01Ca0.26Fe''0.49Mg1.16Fe'''0.03Ti0.00Al0.13Si1.92O6	52.1022	0.0543222	3.09684	1.11815	0	15.9942	0	21.0534	6.46308	0.11784	0	0
2000	1085	0.508792	1.17122	-6106.33	0.153424	0.608482	cpx	Na0.01Ca0.25Fe''0.51Mg1.15Fe'''0.03Ti0.00Al0.13Si1.92O6	52.0082	0.0565448	3.08684	1.1367	0	16.365	0	20.8198	6.40781	0.119184	0	0
2000	1080	0.479243	1.10039	-5733.94	0.144272	0.571977	cpx	Na0.01Ca0.25Fe''0.52Mg1.13Fe'''0.03Ti0.00Al0.13Si1.92O6	51.9125	0.0587852	3.07671	1.15558	0	16.7431	0	20.5827	6.35014	0.120482	0	0
2000	1075	0.452033	1.03524	-5391.26	0.135849	0.538387	cpx	Na0.01Ca0.25Fe''0.53Mg1.12Fe'''0.03Ti0.00Al0.13Si1.92O6	51.8151	0.0610424	3.06644	1.17481	0	17.1289	0	20.3418	6.29017	0.121732	0	0
2000	1070	0.426925	0.975203	-5075.24	0.12808	0.507412	cpx	Na0.01Ca0.25Fe''0.54Mg1.11Fe'''0.03Ti0.00Al0.13Si1.92O6	51.7156	0.0633155	3.05605	1.19444	0	17.5227	0	20.0969	6.22798	0.122933	0	0
2000	1065	0.403711	0.919755	-4783.22	0.120901	0.478791	cpx	Na0.01Ca0.25Fe''0.56Mg1.10Fe'''0.03Ti0.00Al0.13Si1.92O6	51.6141	0.0656036	3.04554	1.21452	0	17.9248	0	19.8476	6.16365	0.124083	0	0
2000	1060	0.382208	0.868457	-4512.87	0.114254	0.452298	cpx	Na0.01Ca0.24Fe''0.57Mg1.09Fe'''0.03Ti0.00Al0.13Si1.92O6	51.5104	0.067906	3.03492	1.23509	0	18.3356	0	19.5936	6.09728	0.125183	0	0
2000	1055	0.362257	0.820918	-4262.17	0.10809	0.427733	cpx	Na0.01Ca0.24Fe''0.59Mg1.08Fe'''0.04Ti0.00Al0.13Si1.92O6	51.4043	0.0702219	3.02419	1.25619	0	18.7555	0	19.3345	6.02895	0.12623	0	0
2000	1050	0.343718	0.776795	-4029.31	0.102365	0.404919	cpx	Na0.01Ca0.24Fe''0.60Mg1.06Fe'''0.04Ti0.00Al0.13Si1.92O6	51.2957	0.0725507	3.01335	1.27788	0	19.1846	0	19.0699	5.95874	0.127223	0	0
2000	1045	0.326467	0.735784	-3812.71	0.09704	0.383702	cpx	Na0.01Ca0.24Fe''0.61Mg1.05Fe'''0.04Ti0.00Al0.13Si1.92O6	51.1845	0.0748919	3.0024	1.3002	0	19.6235	0	18.7996	5.88673	0.12816	0	0
2000	1040	0.310393	0.697615	-3610.97	0.09208	0.363943	cpx	Na0.01Ca0.23Fe''0.63Mg1.04Fe'''0.04Ti0.00Al0.13Si1.92O6	51.0705	0.077245	2.99134	1.32322	0	20.0725	0	18.5232	5.813	0.129041	0	0
2000	1035	0.295398	0.662049	-3422.83	0.087456	0.345519	cpx	Na0.01Ca0.23Fe''0.65Mg1.02Fe'''0.04Ti0.00Al0.13Si1.92O6	50.9536	0.0796097	2.98017	1.347	0	20.5318	0	18.2403	5.73763	0.129863	0	0
2000	1030	0.281396	0.62887	-3247.16	0.083138	0.328322	cpx	Na0.01Ca0.23Fe''0.66Mg1.01Fe'''0.04Ti0.00Al0.13Si1.92O6	50.8336	0.0819858	2.96888	1.37158	0	21.002	0	17.9506	5.6607	0.130626	0	0
2000	1025	0.268306	0.597888	-3082.97	0.079103	0.312252	cpx	Na0.01Ca0.23Fe''0.68Mg0.99Fe'''0.04Ti0.00Al0.13Si1.92O6	50.7105	0.0843731	2.95746	1.39705	0	21.4833	0	17.6537	5.58229	0.131327	0	0
2000	1020	0.256072	0.568956	-2929.49	0.075333	0.297236	cpx	Na0.01Ca0.22Fe''0.70Mg0.98Fe'''0.04Ti0.00Al0.13Si1.92O6	50.584	0.0867715	2.94589	1.42346	0	21.976	0	17.3494	5.50248	0.131964	0	0
2000	1015	0.244643	0.54195	-2786.08	0.071811	0.283211	cpx	Na0.01Ca0.22Fe''0.71Mg0.96Fe'''0.04Ti0.00Al0.13Si1.92O6	50.4541	0.0891813	2.93416	1.45089	0	22.4807	0	17.0371	5.42135	0.132535	0	0
2000	1010	0.233932	0.516663	-2651.64	0.068511	0.270069	cpx	Na0.01Ca0.22Fe''0.73Mg0.95Fe'''0.04Ti0.00Al0.13Si1.92O6	50.3205	0.0916024	2.92224	1.47941	0	22.9975	0	16.7167	5.33898	0.133039	0	0
2000	1005	0.222755	0.490478	-2512.91	0.065088	0.256449	cpx	Na0.01Ca0.21Fe''0.75Mg0.93Fe'''0.04Ti0.00Al0.13Si1.92O6	50.1861	0.093624	2.90889	1.50806	0	23.5214	0	16.3918	5.25664	0.133467	0	0
2000	1000	0.202692	0.444961	-2276.66	0.059101	0.232745	cpx	Na0.01Ca0.21Fe''0.77Mg0.92Fe'''0.04Ti0.00Al0.13Si1.92O6	50.0762	0.0916604	2.88384	1.52797	0	24.0053	0	16.0962	5.18512	0.133779	0	0
2000	995	0.176259	0.385812	-1972.82	0.051305	0.201942	cpx	Na0.01Ca0.21Fe''0.78Mg0.91Fe'''0.04Ti0.00Al0.13Si1.92O6	50.0072	0.0840089	2.84135	1.53301	0	24.4149	0	15.855	5.13052	0.133963	0	0
2000	990	0.164286	0.358558	-1832.42	0.047739	0.187807	cpx	Na0.01Ca0.21Fe''0.80Mg0.89Fe'''0.04Ti0.00Al0.13Si1.92O6	49.9409	0.0762402	2.79738	1.53656	0	24.8207	0	15.6172	5.0769	0.134095	0	0
2000	985	0.154581	0.336388	-1718.09	0.044841	0.176316	cpx	Na0.01Ca0.21Fe''0.81Mg0.88Fe'''0.04Ti0.00Al0.12Si1.92O6	49.873	0.0689275	2.75367	1.54015	0	25.2308	0	15.3767	5.02262	0.134182	0	0
2000	980	0.145441	0.315563	-1610.71	0.042116	0.165515	cpx	Na0.01Ca0.21Fe''0.83Mg0.87Fe'''0.04Ti0.00Al0.12Si1.92O6	49.8035	0.0620582	2.71015	1.54376	0	25.645	0	15.1335	4.96776	0.134224	0	0
feldspar_0	thermodynamic	data	and	composition:
Pressure	Temperature	mass	S	H	V	Cp	formula	SiO2	TiO2	Al2O3	Fe2O3	Cr2O3	FeO	MnO	MgO	CaO	Na2O	K2O	H2O	An
2000	1155	2.70092	6.55066	-37195.6	1.01633	3.31956	K0.00Na0.32Ca0.68Al1.68Si2.32O8	50.9756	0	31.4043	0	0	0	0	0	14.0144	3.59157	0.0142265	0	68
2000	1150	2.47865	6.00461	-34145.1	0.933168	3.04533	K0.00Na0.32Ca0.67Al1.67Si2.33O8	51.1871	0	31.2616	0	0	0	0	0	13.8473	3.6889	0.0151368	0	67.5
2000	1145	2.31408	5.59931	-31887.7	0.871642	2.84214	K0.00Na0.33Ca0.67Al1.67Si2.33O8	51.3971	0	31.1199	0	0	0	0	0	13.6815	3.78547	0.0160823	0	67
2000	1140	2.13246	5.15375	-29394.1	0.803635	2.61817	K0.00Na0.34Ca0.66Al1.66Si2.34O8	51.6075	0	30.978	0	0	0	0	0	13.5153	3.88222	0.0170609	0
2000	1135	1.97358	4.76404	-27212.4	0.744127	2.42225	K0.00Na0.35Ca0.65Al1.65Si2.35O8	51.8182	0	30.8358	0	0	0	0	0	13.3488	3.97913	0.0180744	0
2000	1130	1.83372	4.4211	-25291.8	0.691741	2.24981	K0.00Na0.36Ca0.64Al1.64Si2.36O8	52.0294	0	30.6933	0	0	0	0	0	13.182	4.07618	0.0191243	0
2000	1125	1.70994	4.11764	-23591.7	0.645367	2.0972	K0.00Na0.37Ca0.63Al1.63Si2.37O8	52.2408	0	30.5507	0	0	0	0	0	13.015	4.17334	0.0202124	0
2000	1120	1.59981	3.8477	-22079	0.604101	1.96143	K0.00Na0.38Ca0.62Al1.62Si2.38O8	52.4524	0	30.4079	0	0	0	0	0	12.8478	4.27057	0.0213404	0
2000	1115	1.50135	3.60642	-20726.5	0.567203	1.84006	K0.00Na0.38Ca0.62Al1.62Si2.38O8	52.6642	0	30.265	0	0	0	0	0	12.6805	4.36784	0.0225099	0
2000	1110	1.41292	3.38976	-19511.7	0.534061	1.73107	K0.00Na0.39Ca0.61Al1.61Si2.39O8	52.8759	0	30.1221	0	0	0	0	0	12.5132	4.46508	0.0237227	0
2000	1105	1.33317	3.19438	-18416	0.504164	1.63278	K0.00Na0.40Ca0.60Al1.60Si2.40O8	53.0876	0	29.9793	0	0	0	0	0	12.3459	4.56225	0.0249805	0
2000	1100	1.26094	3.01748	-17423.7	0.477087	1.54377	K0.00Na0.41Ca0.59Al1.59Si2.41O8	53.299	0	29.8365	0	0	0	0	0	12.1788	4.65931	0.0262851	0
2000	1095	1.1953	2.8567	-16521.6	0.45247	1.46287	K0.00Na0.42Ca0.58Al1.58Si2.42O8	53.5102	0	29.694	0	0	0	0	0	12.012	4.75619	0.0276383	0
2000	1090	1.13541	2.71004	-15698.6	0.430009	1.38907	K0.00Na0.43Ca0.57Al1.57Si2.43O8	53.7209	0	29.5517	0	0	0	0	0	11.8454	4.85286	0.0290419	0
2000	1085	1.08059	2.57581	-14945.3	0.409446	1.32152	K0.00Na0.43Ca0.56Al1.56Si2.44O8	53.9312	0	29.4098	0	0	0	0	0	11.6793	4.94926	0.0304979	0
2000	1080	1.03025	2.45255	-14253.4	0.390559	1.25949	K0.00Na0.44Ca0.56Al1.56Si2.44O8	54.1408	0	29.2682	0	0	0	0	0	11.5136	5.04534	0.0320081	0
2000	1075	0.983874	2.33902	-13616	0.373158	1.20235	K0.00Na0.45Ca0.55Al1.55Si2.45O8	54.3497	0	29.1272	0	0	0	0	0	11.3484	5.14107	0.0335745	0
2000	1070	0.941032	2.23414	-13027.1	0.357079	1.14957	K0.00Na0.46Ca0.54Al1.54Si2.46O8	54.5579	0	28.9866	0	0	0	0	0	11.1839	5.23639	0.0351993	0
2000	1065	0.901342	2.13698	-12481.5	0.34218	1.10067	K0.00Na0.47Ca0.53Al1.53Si2.47O8	54.7651	0	28.8466	0	0	0	0	0	11.0201	5.33128	0.0368844	0
2000	1060	0.864474	2.04673	-11974.6	0.328337	1.05525	K0.00Na0.47Ca0.52Al1.52Si2.48O8	54.9714	0	28.7073	0	0	0	0	0	10.857	5.42569	0.0386321	0
2000	1055	0.830141	1.9627	-11502.6	0.315443	1.01296	K0.00Na0.48Ca0.52Al1.52Si2.48O8	55.1767	0	28.5686	0	0	0	0	0	10.6946	5.51959	0.0404446	0
2000	1050	0.79809	1.88426	-11061.9	0.303404	0.973475	K0.00Na0.49Ca0.51Al1.51Si2.49O8	55.3809	0	28.4306	0	0	0	0	0	10.5332	5.61295	0.0423243	0
2000	1045	0.768099	1.81086	-10649.5	0.292135	0.936532	K0.00Na0.50Ca0.50Al1.50Si2.50O8	55.584	0	28.2934	0	0	0	0	0	10.3726	5.70574	0.0442737	0
2000	1040	0.739974	1.74203	-10262.7	0.281565	0.901889	K0.00Na0.51Ca0.49Al1.49Si2.51O8	55.7859	0	28.157	0	0	0	0	0	10.2129	5.79795	0.0462952	0
2000	1035	0.713541	1.67736	-9899.2	0.271629	0.869333	K0.00Na0.51Ca0.48Al1.48Si2.52O8	55.9866	0	28.0213	0	0	0	0	0	10.0542	5.88955	0.0483915	0
2000	1030	0.688649	1.61645	-9556.81	0.262268	0.838674	K0.00Na0.52Ca0.48Al1.48Si2.52O8	56.186	0	27.8865	0	0	0	0	0	9.8964	5.98052	0.0505655	0
2000	1025	0.665159	1.55899	-9233.7	0.253433	0.809745	K0.00Na0.53Ca0.47Al1.47Si2.53O8	56.3842	0	27.7525	0	0	0	0	0	9.73962	6.07086	0.0528199	0
2000	1020	0.642984	1.50474	-8928.66	0.24509	0.787758	K0.00Na0.54Ca0.46Al1.46Si2.54O8	56.5811	0	27.6194	0	0	0	0	0	9.58384	6.16057	0.055158	0
2000	1015	0.622058	1.45353	-8640.79	0.237214	0.76191	K0.00Na0.54Ca0.45Al1.45Si2.55O8	56.7767	0	27.487	0	0	0	0	0	9.429	6.24965	0.0575832	0
2000	1010	0.602206	1.40496	-8367.67	0.22974	0.73739	K0.00Na0.55Ca0.45Al1.45Si2.55O8	56.9712	0	27.3555	0	0	0	0	0	9.27512	6.33811	0.060099	0
2000	1005	0.585872	1.36471	-8143.27	0.223602	0.717191	K0.00Na0.56Ca0.44Al1.44Si2.56O8	57.1652	0	27.2242	0	0	0	0	0	9.12151	6.42635	0.0627102	0
2000	1000	0.591647	1.37601	-8226.1	0.225905	0.724065	K0.00Na0.57Ca0.43Al1.43Si2.57O8	57.3658	0	27.0885	0	0	0	0	0	8.96278	6.51751	0.0654326	0
2000	995	0.605575	1.40622	-8422.31	0.23133	0.74092	K0.00Na0.57Ca0.42Al1.42Si2.58O8	57.5765	0	26.9459	0	0	0	0	0	8.79599	6.61333	0.0682593	0
2000	990	0.585721	1.35798	-8148.65	0.223849	0.716444	K0.00Na0.58Ca0.41Al1.41Si2.59O8	57.7863	0	26.804	0	0	0	0	0	8.6299	6.70867	0.0711672	0
2000	985	0.563741	1.30495	-7845.25	0.215546	0.689379	K0.00Na0.59Ca0.41Al1.41Si2.59O8	57.994	0	26.6634	0	0	0	0	0	8.46548	6.80298	0.0741564	0
2000	980	0.543039	1.25501	-7559.46	0.207723	0.66389	K0.00Na0.60Ca0.40Al1.40Si2.60O8	58.1996	0	26.5242	0	0	0	0	0	8.3027	6.89627	0.0772282	0
2000	975	0.541577	1.2496	-7541.43	0.207256	0.661931	K0.00Na0.61Ca0.39Al1.39Si2.61O8	58.4046	0	26.3855	0	0	0	0	0	8.14035	6.98934	0.080254	0
2000	970	0.551614	1.27061	-7683.64	0.211177	0.674005	K0.00Na0.61Ca0.38Al1.38Si2.62O8	58.5888	0	26.2607	0	0	0	0	0	7.99449	7.0728	0.0831987	0
2000	965	0.531544	1.22229	-7406.46	0.20357	0.649295	K0.00Na0.62Ca0.38Al1.38Si2.62O8	58.7698	0	26.1381	0	0	0	0	0	7.85109	7.15478	0.0862013	0
2000	960	0.512332	1.17608	-7141.06	0.196284	0.625644	K0.01Na0.63Ca0.37Al1.37Si2.63O8	58.9479	0	26.0175	0	0	0	0	0	7.71003	7.23534	0.0892631	0
2000	955	0.493928	1.13185	-6886.77	0.1893	0.602993	K0.01Na0.63Ca0.36Al1.36Si2.64O8	59.1231	0	25.8988	0	0	0	0	0	7.5712	7.31455	0.0923859	0
2000	950	0.47629	1.0895	-6643	0.182603	0.581288	K0.01Na0.64Ca0.36Al1.36Si2.64O8	59.2956	0	25.7819	0	0	0	0	0	7.4345	7.39248	0.0955717	0
2000	945	0.459377	1.04893	-6409.19	0.176179	0.56048	K0.01Na0.65Ca0.35Al1.35Si2.65O8	59.4655	0	25.6667	0	0	0	0	0	7.2998	7.46918	0.0988225	0
2000	940	0.443151	1.01005	-6184.84	0.170013	0.540524	K0.01Na0.65Ca0.34Al1.34Si2.66O8	59.633	0	25.5531	0	0	0	0	0	7.16701	7.54471	0.102141	0
2000	935	0.427581	0.972771	-5969.48	0.164092	0.521378	K0.01Na0.66Ca0.34Al1.34Si2.66O8	59.7982	0	25.4411	0	0	0	0	0	7.03603	7.61914	0.105529	0
2000	930	0.412632	0.937026	-5762.68	0.158406	0.503001	K0.01Na0.66Ca0.33Al1.33Si2.67O8	59.9613	0	25.3305	0	0	0	0	0	6.90674	7.69253	0.108991	0
2000	925	0.398277	0.902736	-5564.03	0.152942	0.485359	K0.01Na0.67Ca0.32Al1.32Si2.68O8	60.1223	0	25.2212	0	0	0	0	0	6.77905	7.76492	0.112529	0
2000	920	0.384486	0.869833	-5373.15	0.147692	0.468417	K0.01Na0.68Ca0.32Al1.32Si2.68O8	60.2814	0	25.1133	0	0	0	0	0	6.65287	7.83637	0.116146	0
2000	915	0.371236	0.838253	-5189.69	0.142645	0.452144	K0.01Na0.68Ca0.31Al1.31Si2.69O8	60.4386	0	25.0065	0	0	0	0	0	6.52811	7.90693	0.119847	0
2000	910	0.3585	0.807935	-5013.31	0.137791	0.436508	K0.01Na0.69Ca0.31Al1.31Si2.69O8	60.5941	0	24.9009	0	0	0	0	0	6.40468	7.97665	0.123635	0
2000	905	0.346256	0.778823	-4843.7	0.133124	0.421481	K0.01Na0.69Ca0.30Al1.30Si2.70O8	60.7481	0	24.7963	0	0	0	0	0	6.2825	8.04557	0.127514	0
2000	900	0.334482	0.750862	-4680.55	0.128634	0.407038	K0.01Na0.70Ca0.29Al1.29Si2.71O8	60.9005	0	24.6928	0	0	0	0	0	6.16151	8.11373	0.13149	0
spinel_0	thermodynamic	data	and	composition:
Pressure	Temperature	mass	S	H	V	Cp	formula	SiO2	TiO2	Al2O3	Fe2O3	Cr2O3	FeO	MnO	MgO	CaO	Na2O	K2O	H2O
2000	1005	0.005819	0.011696	-30.4455	0.001216	0.005314	Fe''1.15Mg0.14Fe'''1.21Al0.19Cr0.03Ti0.28O4	0	10.3357	4.49826	43.9413	1.11772	37.617	0	2.48996	0	0	0	0
2000	1000	0.058617	0.117358	-304.327	0.012239	0.053491	Fe''1.17Mg0.13Fe'''1.22Al0.18Cr0.00Ti0.30O4	0	10.7973	4.20236	44.3736	0.0916463	38.1691	0	2.36595	0	0	0	0
2000	995	0.13313	0.265603	-685.82	0.027748	0.121351	Fe''1.16Mg0.12Fe'''1.25Al0.18Cr0.00Ti0.29O4	0	10.3505	4.14324	45.3374	0	37.9163	0	2.25258	0	0	0	0
2000	990	0.133877	0.266195	-684.357	0.027853	0.121892	Fe''1.15Mg0.12Fe'''1.28Al0.18Cr0.00Ti0.27O4	0	9.81085	4.10937	46.361	0	37.5731	0	2.14562	0	0	0	0
2000	985	0.127356	0.252371	-646.073	0.026449	0.115824	Fe''1.14Mg0.11Fe'''1.31Al0.18Cr0.00Ti0.26O4	0	9.26914	4.07839	47.3883	0	37.2199	0	2.0443	0	0	0	0
2000	980	0.121499	0.239945	-611.747	0.025189	0.110377	Fe''1.13Mg0.11Fe'''1.34Al0.18Cr0.00Ti0.24O4	0	8.72601	4.05014	48.418	0	36.8575	0	1.94832	0	0	0	0
2000	975	0.108367	0.213301	-541.86	0.02243	0.098343	Fe''1.13Mg0.10Fe'''1.37Al0.17Cr0.00Ti0.23O4	0	8.2486	4.01076	49.3382	0	36.5421	0	1.86032	0	0	0	0
2000	970	0.097649	0.191573	-485.01	0.02018	0.088519	Fe''1.12Mg0.10Fe'''1.39Al0.17Cr0.00Ti0.22O4	0	7.83032	3.95556	50.1627	0	36.2796	0	1.77184	0	0	0	0
2000	965	0.092003	0.179902	-453.991	0.018984	0.083311	Fe''1.11Mg0.09Fe'''1.42Al0.17Cr0.00Ti0.21O4	0	7.41979	3.90131	50.9734	0	36.0177	0	1.68777	0	0	0	0
2000	960	0.086778	0.169126	-425.484	0.017879	0.078496	Fe''1.11Mg0.09Fe'''1.44Al0.17Cr0.00Ti0.20O4	0	7.0174	3.84786	51.7698	0	35.7571	0	1.60784	0	0	0	0
2000	955	0.081937	0.159167	-399.259	0.016858	0.074041	Fe''1.10Mg0.08Fe'''1.47Al0.17Cr0.00Ti0.18O4	0	6.6235	3.79504	52.5511	0	35.4985	0	1.53181	0	0	0	0
2000	950	0.077451	0.149958	-375.115	0.015913	0.069915	Fe''1.09Mg0.08Fe'''1.49Al0.16Cr0.00Ti0.17O4	0	6.23846	3.7427	53.3167	0	35.2426	0	1.45945	0	0	0	0
2000	945	0.07329	0.141436	-352.872	0.015037	0.066092	Fe''1.09Mg0.08Fe'''1.51Al0.16Cr0.00Ti0.16O4	0	5.86266	3.69068	54.0661	0	34.9901	0	1.39055	0	0	0	0
2000	940	0.069431	0.133549	-332.368	0.014227	0.062548	Fe''1.08Mg0.07Fe'''1.53Al0.16Cr0.00Ti0.15O4	0	5.49644	3.63883	54.7984	0	34.7414	0	1.3249	0	0	0	0
2000	935	0.06585	0.126245	-313.461	0.013476	0.059263	Fe''1.07Mg0.07Fe'''1.55Al0.16Cr0.00Ti0.14O4	0	5.1402	3.58698	55.5132	0	34.4973	0	1.26232	0	0	0	0
2000	930	0.062527	0.119482	-296.02	0.01278	0.056217	Fe''1.07Mg0.07Fe'''1.58Al0.16Cr0.00Ti0.13O4	0	4.7943	3.535	56.2097	0	34.2584	0	1.20263	0	0	0	0
2000	925	0.059443	0.113217	-279.928	0.012135	0.053392	Fe''1.06Mg0.06Fe'''1.60Al0.15Cr0.00Ti0.13O4	0	4.45912	3.48275	56.8873	0	34.0252	0	1.14566	0	0	0	0
2000	920	0.056581	0.107414	-265.075	0.011538	0.050772	Fe''1.06Mg0.06Fe'''1.62Al0.15Cr0.00Ti0.12O4	0	4.13507	3.4301	57.5453	0	33.7983	0	1.09126	0	0	0	0
2000	915	0.053924	0.102035	-251.362	0.010984	0.048342	Fe''1.05Mg0.06Fe'''1.64Al0.15Cr0.00Ti0.11O4	0	3.82253	3.3769	58.183	0	33.5783	0	1.0393	0	0	0	0
2000	910	0.051457	0.09705	-238.697	0.01047	0.046086	Fe''1.04Mg0.06Fe'''1.66Al0.15Cr0.00Ti0.10O4	0	3.52191	3.32306	58.7997	0	33.3657	0	0.989626	0	0	0	0
2000	905	0.049165	0.092426	-226.991	0.009993	0.043992	Fe''1.04Mg0.05Fe'''1.67Al0.14Cr0.00Ti0.09O4	0	3.2336	3.26846	59.3947	0	33.1611	0	0.942119	0	0	0	0
2000	900	0.047034	0.088134	-216.164	0.00955	0.042047	Fe''1.03Mg0.05Fe'''1.69Al0.14Cr0.00Ti0.08O4	0	2.95799	3.213	59.9673	0	32.965	0	0.896659	0	0	0	0
orthopyroxene_0	thermodynamic	data	and	composition:
Pressure	Temperature	mass	S	H	V	Cp	structure	formula	SiO2	TiO2	Al2O3	Fe2O3	Cr2O3	FeO	MnO	MgO	CaO	Na2O	K2O	H2O	Mg#
2000	1155	0.88744	2.12288	-11204	0.273664	1.1147	opx	Na0.00Ca0.09Fe''0.34Mg1.52Fe'''0.02Ti0.00Al0.10Si1.94O6	54.7558	0.0155838	2.29362	0.610602	0	11.3843	0	28.6598	2.25227	0.0280779	0	0	81.7204
2000	1150	0.339821	0.810913	-4279.12	0.104636	0.426043	opx	Na0.00Ca0.09Fe''0.35Mg1.51Fe'''0.02Ti0.00Al0.10Si1.94O6	54.671	0.0163214	2.27624	0.617795	0	11.727	0	28.4076	2.25549	0.0285323	0	0	81.1828
Title:	opx1a	(from	opx1	at	1160	giving	opx-cpx+pl	at	liq)
Phase	Masses:
Pressure	Temperature	mass	liquid_0	olivine_0	orthopyroxene_0	clinopyroxene_0	clinopyroxene_1	feldspar_0	spinel_0
2000	1200	99.9976	99.9976	0	0	0	0	0	0
2000	1195	99.9979	99.9979	0	0	0	0	0	0
2000	1190	99.9982	99.9982	0	0	0	0	0	0
2000	1185	99.9984	99.9984	0	0	0	0	0	0
2000	1180	99.9987	99.9987	0	0	0	0	0	0
2000	1175	99.999	99.999	0	0	0	0	0	0
2000	1170	99.9993	99.9993	0	0	0	0	0	0
2000	1165	99.9996	99.9996	0	0	0	0	0	0
2000	1160	99.9999	99.9999	0	0	0	0	0	0
2000	1155	99.9987	95.2001	0	0.88744	1.21026	0	2.70092	0
2000	1150	95.2018	90.7984	0	0.339821	0.856997	0.727968	2.47865	0
2000	1145	90.8011	86.7202	0	0	0.547707	1.21906	2.31408	0
2000	1140	86.722	83.0033	0	0	0.471182	1.11512	2.13246	0
2000	1135	83.0051	79.6007	0	0	0.405828	1.02507	1.97358	0
2000	1130	79.6026	76.4734	0	0	0.350093	0.945398	1.83372	0
2000	1125	76.4754	73.5886	0	0	0.30239	0.874533	1.70994	0
2000	1120	73.5907	70.9182	0	0	0.261432	0.81119	1.59981	0
2000	1115	70.9204	68.4386	0	0	0.226167	0.754314	1.50135	0
2000	1110	68.4408	66.1291	0	0	0.195729	0.703033	1.41292	0
2000	1105	66.1314	63.9722	0	0	0.169403	0.65662	1.33317	0
2000	1100	63.9745	61.9525	0	0	0.146593	0.614466	1.26094	0
2000	1095	61.9548	60.0566	0	0	0.126799	0.576058	1.1953	0
2000	1090	60.059	58.2731	0	0	0.109602	0.540957	1.13541	0
2000	1085	58.2755	56.5914	0	0	0.094648	0.508792	1.08059	0
2000	1080	56.5939	55.0028	0	0	0.081636	0.479243	1.03025	0
2000	1075	55.0052	53.499	0	0	0.070311	0.452033	0.983874	0
2000	1070	53.5015	52.0731	0	0	0.060453	0.426925	0.941032	0
2000	1065	52.0756	50.7187	0	0	0.051877	0.403711	0.901342	0
2000	1060	50.7213	49.4302	0	0	0.04442	0.382208	0.864474	0
2000	1055	49.4327	48.2024	0	0	0.037944	0.362257	0.830141	0
2000	1050	48.205	47.0309	0	0	0.03233	0.343718	0.79809	0
2000	1045	47.0335	45.9114	0	0	0.027474	0.326467	0.768099	0
2000	1040	45.9141	44.8404	0	0	0.023285	0.310393	0.739974	0
2000	1035	44.8431	43.8145	0	0	0.019687	0.295398	0.713541	0
2000	1030	43.8171	42.8305	0	0	0.016611	0.281396	0.688649	0
2000	1025	42.8332	41.8857	0	0	0.013999	0.268306	0.665159	0
2000	1020	41.8884	40.9776	0	0	0.011786	0.256072	0.642984	0
2000	1015	40.9803	40.1037	0	0	0.009912	0.244643	0.622058	0
2000	1010	40.1064	39.2619	0	0	0.008371	0.233932	0.602206	0
2000	1005	39.2648	38.4421	0	0	0.008296	0.222755	0.585872	0.005819
2000	1000	38.4477	37.5782	0	0	0.016516	0.202692	0.591647	0.058617
2000	995	37.5864	36.6432	0	0	0.028245	0.176259	0.605575	0.13313
2000	990	36.6515	35.7414	0	0	0.026246	0.164286	0.585721	0.133877
2000	985	35.7496	34.8806	0	0	0.023335	0.154581	0.563741	0.127356
2000	980	34.8887	34.0578	0	0	0.020971	0.145441	0.543039	0.121499
2000	975	34.0651	33.2603	0.109429	0	0.045418	0	0.541577	0.108367
2000	970	33.267	32.4633	0.14244	0	0.011971	0	0.551614	0.097649
2000	965	32.4699	31.6987	0.137848	0	0.009759	0	0.531544	0.092003
2000	960	31.7051	30.9647	0.133283	0	0.008009	0	0.512332	0.086778
2000	955	30.971	30.2597	0.128747	0	0.00665	0	0.493928	0.081937
2000	950	30.2659	29.5823	0.124242	0	0.005624	0	0.47629	0.077451
2000	945	29.5883	28.931	0.119769	0	0.004882	0	0.459377	0.07329
2000	940	28.9369	28.3046	0.11533	0	0.00438	0	0.443151	0.069431
2000	935	28.3104	27.702	0.110928	0	0.004083	0	0.427581	0.06585
2000	930	27.7077	27.122	0.106566	0	0.003957	0	0.412632	0.062527
2000	925	27.1276	26.5637	0.102246	0	0.003978	0	0.398277	0.059443
2000	920	26.5692	26.0261	0.097972	0	0.00412	0	0.384486	0.056581
2000	915	26.0316	25.5083	0.093749	0	0.004364	0	0.371236	0.053924
2000	910	25.5137	25.0095	0.08958	0	0.004693	0	0.3585	0.051457
2000	905	25.0148	24.5288	0.085471	0	0.005091	0	0.346256	0.049165
2000	900	24.5341	24.0656	0.081428	0	0.005545	0	0.334482	0.047034
Title:	opx1a	(from	opx1	at	1160	giving	opx-cpx+pl	at	liq)
Phase	Volumes:
Pressure	Temperature	mass	V	liquid_0	olivine_0	orthopyroxene_0	clinopyroxene_0	clinopyroxene_1 (pigeonite)	feldspar_0	spinel_0
2000	1200	99.9976	39.5636	39.5636	0	0	0	0	0	0
2000	1195	99.9979	39.5465	39.5465	0	0	0	0	0	0
2000	1190	99.9982	39.5295	39.5295	0	0	0	0	0	0
2000	1185	99.9984	39.5125	39.5125	0	0	0	0	0	0
2000	1180	99.9987	39.4955	39.4955	0	0	0	0	0	0
2000	1175	99.999	39.4786	39.4786	0	0	0	0	0	0
2000	1170	99.9993	39.4616	39.4616	0	0	0	0	0	0
2000	1165	99.9996	39.4447	39.4447	0	0	0	0	0	0
2000	1160	99.9999	39.4277	39.4277	0	0	0	0	0	0	V (cm3)	Mg# opx	An in pl
2000	1155	99.9987	39.2686	37.604	0	0.273664	0.374572	0	1.01633	0	1.66457	81.7204	68
2000	1150	95.2018	37.4594	35.9327	0	0.104636	0.264969	0.223875	0.933168	0	1.52665	81.1828	67.5
2000	1145	90.8011	35.7999	34.3847	0	0	0.169179	0.374374	0.871642	0	1.41519		67
2000	1140	86.722	34.2634	32.9724	0	0	0.145401	0.341967	0.803635	0
2000	1135	83.0051	32.8612	31.6781	0	0	0.125112	0.313899	0.744127	0
2000	1130	79.6026	31.5758	30.4872	0	0	0.107824	0.289083	0.691741	0
2000	1125	76.4754	30.3927	29.3873	0	0	0.093041	0.267022	0.645367	0
2000	1120	73.5907	29.2998	28.368	0	0	0.08036	0.247314	0.604101	0
2000	1115	70.9204	28.2867	27.4204	0	0	0.069451	0.229629	0.567203	0
2000	1110	68.4408	27.3445	26.5368	0	0	0.060044	0.213692	0.534061	0
2000	1105	66.1314	26.4658	25.7104	0	0	0.051916	0.199277	0.504164	0
2000	1100	63.9745	25.6438	24.9357	0	0	0.044879	0.186192	0.477087	0
2000	1095	61.9548	24.873	24.2075	0	0	0.038779	0.174276	0.45247	0
2000	1090	60.059	24.1485	23.5216	0	0	0.033485	0.163392	0.430009	0
2000	1085	58.2755	23.4658	22.874	0	0	0.028886	0.153424	0.409446	0
2000	1080	56.5939	22.8211	22.2614	0	0	0.024888	0.144272	0.390559	0
2000	1075	55.0052	22.2112	21.6808	0	0	0.021412	0.135849	0.373158	0
2000	1070	53.5015	21.6331	21.1295	0	0	0.01839	0.12808	0.357079	0
2000	1065	52.0756	21.084	20.6052	0	0	0.015763	0.120901	0.34218	0
2000	1060	50.7213	20.5618	20.1057	0	0	0.013482	0.114254	0.328337	0
2000	1055	49.4327	20.0642	19.6291	0	0	0.011503	0.10809	0.315443	0
2000	1050	48.205	19.5893	19.1738	0	0	0.009789	0.102365	0.303404	0
2000	1045	47.0335	19.1356	18.7381	0	0	0.008309	0.09704	0.292135	0
2000	1040	45.9141	18.7015	18.3208	0	0	0.007033	0.09208	0.281565	0
2000	1035	44.8431	18.2855	17.9205	0	0	0.005939	0.087456	0.271629	0
2000	1030	43.8171	17.8865	17.5361	0	0	0.005004	0.083138	0.262268	0
2000	1025	42.8332	17.5033	17.1665	0	0	0.004212	0.079103	0.253433	0
2000	1020	41.8884	17.1348	16.8109	0	0	0.003541	0.075333	0.24509	0
2000	1015	40.9803	16.7802	16.4682	0	0	0.002974	0.071811	0.237214	0
2000	1010	40.1064	16.4385	16.1378	0	0	0.002508	0.068511	0.22974	0
2000	1005	39.2648	16.109	15.8167	0	0	0.002482	0.065088	0.223602	0.001216
2000	1000	38.4477	15.7894	15.4872	0	0	0.004934	0.059101	0.225905	0.012239
2000	995	37.5864	15.4615	15.1427	0	0	0.008431	0.051305	0.23133	0.027748
2000	990	36.6515	15.1181	14.8109	0	0	0.007827	0.047739	0.223849	0.027853
2000	985	35.7496	14.7872	14.4935	0	0	0.006953	0.044841	0.215546	0.026449
2000	980	34.8887	14.4707	14.1895	0	0	0.006243	0.042116	0.207723	0.025189
2000	975	34.0651	14.1693	13.8976	0.028507	0	0.013508	0	0.207256	0.02243
2000	970	33.267	13.8779	13.6061	0.036964	0	0.003557	0	0.211177	0.02018
2000	965	32.4699	13.5869	13.3258	0.035637	0	0.002898	0	0.20357	0.018984
2000	960	31.7051	13.3072	13.0564	0.034329	0	0.002376	0	0.196284	0.017879
2000	955	30.971	13.0382	12.7971	0.03304	0	0.001971	0	0.1893	0.016858
2000	950	30.2659	12.7794	12.5475	0.031771	0	0.001665	0	0.182603	0.015913
2000	945	29.5883	12.5302	12.3071	0.03052	0	0.001444	0	0.176179	0.015037
2000	940	28.9369	12.2902	12.0754	0.02929	0	0.001294	0	0.170013	0.014227
2000	935	28.3104	12.059	11.8522	0.028079	0	0.001205	0	0.164092	0.013476
2000	930	27.7077	11.8361	11.6369	0.026888	0	0.001167	0	0.158406	0.01278
2000	925	27.1276	11.6212	11.4292	0.025717	0	0.001171	0	0.152942	0.012135
2000	920	26.5692	11.4139	11.2289	0.024567	0	0.001212	0	0.147692	0.011538
2000	915	26.0316	11.2139	11.0355	0.023439	0	0.001282	0	0.142645	0.010984
2000	910	25.5137	11.0208	10.8489	0.022332	0	0.001377	0	0.137791	0.01047
2000	905	25.0148	10.8345	10.6687	0.021249	0	0.001492	0	0.133124	0.009993
2000	900	24.5341	10.6546	10.4946	0.020189	0	0.001623	0	0.128634	0.00955
Title:	opx1a	(from	opx1	at	1160	giving	opx-cpx+pl	at	liq)
Solid	Composition:
Pressure	Temperature	mass	SiO2	TiO2	Al2O3	Fe2O3	Cr2O3	FeO	MnO	MgO	CaO	Na2O	K2O	H2O
2000	1500	0	---
2000	1500	0	---
2000	1495	0	---
2000	1490	0	---
2000	1485	0	---
2000	1480	0	---
2000	1475	0	---
2000	1470	0	---
2000	1465	0	---
2000	1460	0	---
2000	1455	0	---
2000	1450	0	---
2000	1445	0	---
2000	1440	0	---
2000	1435	0	---
2000	1430	0	---
2000	1425	0	---
2000	1420	0	---
2000	1415	0	---
2000	1410	0	---
2000	1405	0	---
2000	1400	0	---
2000	1395	0	---
2000	1390	0	---
2000	1385	0	---
2000	1380	0	---
2000	1375	0	---
2000	1370	0	---
2000	1365	0	---
2000	1360	0	---
2000	1355	0	---
2000	1350	0	---
2000	1345	0	---
2000	1340	0	---
2000	1335	0	---
2000	1330	0	---
2000	1325	0	---
2000	1320	0	---
2000	1315	0	---
2000	1310	0	---
2000	1305	0	---
2000	1300	0	---
2000	1295	0	---
2000	1290	0	---
2000	1285	0	---
2000	1280	0	---
2000	1275	0	---
2000	1270	0	---
2000	1265	0	---
2000	1260	0	---
2000	1255	0	---
2000	1250	0	---
2000	1245	0	---
2000	1240	0	---
2000	1235	0	---
2000	1230	0	---
2000	1225	0	---
2000	1220	0	---
2000	1215	0	---
2000	1210	0	---
2000	1205	0	---
2000	1200	0	---
2000	1195	0	---
2000	1190	0	---
2000	1185	0	---
2000	1180	0	---
2000	1175	0	---
2000	1170	0	---
2000	1165	0	---
2000	1160	0	---
2000	1155	4.79863	51.9709	0.0173363	19.1015	0.407938	0	3.89439	0	9.8632	12.6583	2.07847	0.00800745	0
2000	1150	4.40344	51.9559	0.018177	19.0733	0.430388	0	4.30869	0	9.60885	12.4605	2.13573	0.00852037	0
2000	1145	4.08085	51.979	0.0183892	19.1329	0.440526	0	4.67826	0	9.40774	12.1287	2.20537	0.0091196	0
2000	1140	3.71877	52.0638	0.019207	19.2212	0.441045	0	4.74993	0	9.21456	11.9958	2.2847	0.00978331	0
2000	1135	3.40447	52.1522	0.0199975	19.3045	0.441332	0	4.82232	0	9.02561	11.8587	2.36487	0.0104777	0
2000	1130	3.12921	52.2437	0.0207586	19.3869	0.441315	0	4.89296	0	8.83669	11.72	2.44642	0.0112069	0
2000	1125	2.88686	52.3384	0.0214883	19.4679	0.441027	0	4.96199	0	8.64803	11.5799	2.52926	0.0119722	0
2000	1120	2.67243	52.4362	0.0221852	19.5472	0.440499	0	5.02954	0	8.45985	11.4385	2.61332	0.0127751	0
2000	1115	2.48183	52.5369	0.0228479	19.6244	0.439764	0	5.09576	0	8.27238	11.2958	2.69852	0.013617	0
2000	1110	2.31168	52.6406	0.0234751	19.6991	0.438853	0	5.1608	0	8.08582	11.1521	2.78476	0.0144995	0
2000	1105	2.15919	52.747	0.0240662	19.7711	0.437797	0	5.2248	0	7.90037	11.0075	2.87194	0.0154239	0
2000	1100	2.02201	52.8561	0.0246205	19.84	0.436627	0	5.28792	0	7.7162	10.8622	2.95996	0.0163917	0
2000	1095	1.89815	52.9677	0.0251378	19.9057	0.435374	0	5.35034	0	7.5335	10.7162	3.04871	0.0174043	0
2000	1090	1.78597	53.0816	0.025618	19.9678	0.434069	0	5.41221	0	7.35241	10.5697	3.13809	0.0184631	0
2000	1085	1.68403	53.1976	0.0260614	20.0262	0.432744	0	5.47372	0	7.1731	10.423	3.22798	0.0195696	0
2000	1080	1.59112	53.3157	0.0264688	20.0807	0.431428	0	5.53503	0	6.99567	10.276	3.31827	0.0207251	0
2000	1075	1.50622	53.4355	0.0268409	20.1311	0.430154	0	5.59635	0	6.82027	10.129	3.40883	0.0219312	0
2000	1070	1.42841	53.5569	0.027179	20.1773	0.428952	0	5.65786	0	6.64698	9.98208	3.49957	0.0231892	0
2000	1065	1.35693	53.6797	0.0274848	20.219	0.427855	0	5.71975	0	6.47591	9.83542	3.59036	0.0245005	0
2000	1060	1.2911	53.8037	0.0277603	20.2562	0.426894	0	5.78225	0	6.30714	9.68913	3.68109	0.0258666	0
2000	1055	1.23034	53.9286	0.0280081	20.2887	0.426104	0	5.84557	0	6.14073	9.54335	3.77165	0.0272889	0
2000	1050	1.17414	54.0542	0.028231	20.3165	0.425517	0	5.90993	0	5.97674	9.3982	3.86191	0.0287689	0
2000	1045	1.12204	54.1803	0.0284326	20.3394	0.42517	0	5.97558	0	5.81523	9.25382	3.95177	0.0303078	0
2000	1040	1.07365	54.3067	0.0286173	20.3573	0.4251	0	6.04276	0	5.65621	9.11034	4.04112	0.0319072	0
2000	1035	1.02863	54.4331	0.0287901	20.3701	0.425346	0	6.11172	0	5.49972	8.96786	4.12983	0.0335684	0
2000	1030	0.986656	54.5592	0.0289569	20.3777	0.425949	0	6.18276	0	5.34577	8.82652	4.2178	0.0352928	0
2000	1025	0.947465	54.6849	0.029125	20.3801	0.426954	0	6.25614	0	5.19437	8.68644	4.30491	0.0370817	0
2000	1020	0.910843	54.81	0.0292973	20.3773	0.428381	0	6.33208	0	5.04537	8.54759	4.39113	0.0389372	0
2000	1015	0.876613	54.9343	0.0294747	20.3696	0.430236	0	6.41073	0	4.89858	8.40985	4.47645	0.0408619	0
2000	1010	0.844509	55.0574	0.0296811	20.3562	0.432641	0	6.49262	0	4.75426	8.2737	4.56061	0.0428557	0
2000	1005	0.822742	54.7954	0.103119	20.2464	0.742968	0.00790492	6.76105	0	4.57892	8.10292	4.61665	0.0446557	0
2000	1000	0.869472	51.6506	0.758209	19.4649	3.39361	0.00617846	8.41226	0	4.14005	7.65512	4.47449	0.0445248	0
2000	995	0.943209	47.7952	1.48982	18.5349	6.75847	0	10.3036	0	3.63614	7.15368	4.2844	0.043825	0
2000	990	0.91013	47.6329	1.4687	18.4719	7.16736	0	10.3885	0	3.47273	6.99733	4.35467	0.0458002	0
2000	985	0.869012	47.8242	1.38083	18.4877	7.28472	0	10.3037	0	3.34573	6.87566	4.44939	0.0481063	0
2000	980	0.83095	48.0026	1.29554	18.4961	7.41199	0	10.2228	0	3.22217	6.75626	4.54207	0.0504699	0
2000	975	0.804791	46.6275	1.12891	18.5061	6.78332	0	12.0618	0.448437	3.10566	6.55418	4.73008	0.0540062	0
2000	970	0.803674	46.8259	0.955972	18.5599	6.13227	0	13.0294	0.597507	3.15991	5.82037	4.86169	0.0571047	0
2000	965	0.771155	47.0353	0.888892	18.528	6.1135	0	13.0845	0.615312	3.0319	5.70533	4.93788	0.0594171	0
2000	960	0.740402	47.2412	0.825427	18.493	6.09535	0	13.1359	0.632016	2.90712	5.59613	5.01201	0.0617669	0
2000	955	0.711263	47.4441	0.765443	18.4555	6.07816	0	13.1827	0.647557	2.78554	5.49259	5.08427	0.0641563	0
2000	950	0.683607	47.644	0.708805	18.4159	6.06229	0	13.224	0.661883	2.66716	5.39456	5.15483	0.0665877	0
2000	945	0.657318	47.8413	0.655381	18.3748	6.04811	0	13.2587	0.674945	2.55195	5.30188	5.22387	0.0690636	0
2000	940	0.632293	48.0362	0.605042	18.3325	6.03602	0	13.2861	0.686698	2.43993	5.21438	5.29155	0.0715869	0
2000	935	0.608441	48.2289	0.557658	18.2895	6.02641	0	13.3053	0.697108	2.33107	5.13189	5.35801	0.0741605	0
2000	930	0.585682	48.4195	0.513102	18.2461	6.01965	0	13.3156	0.706146	2.22538	5.05427	5.42341	0.0767877	0
2000	925	0.563943	48.6084	0.471249	18.2025	6.01611	0	13.3164	0.713788	2.12285	4.98135	5.48787	0.0794719	0
2000	920	0.543159	48.7957	0.431977	18.159	6.01612	0	13.3071	0.72002	2.02348	4.91296	5.55153	0.0822166	0
2000	915	0.523272	48.9815	0.395166	18.1157	6.01996	0	13.2871	0.724834	1.92727	4.84895	5.61449	0.0850255	0
2000	910	0.50423	49.1661	0.360697	18.0729	6.02785	0	13.2562	0.728231	1.83419	4.78916	5.67686	0.0879026	0
2000	905	0.485983	49.3496	0.32846	18.0305	6.03993	0	13.2139	0.730219	1.74423	4.73343	5.73875	0.090852	0
2000	900	0.468489	49.5324	0.298345	17.9889	6.05623	0	13.1603	0.730816	1.65738	4.68158	5.80024	0.0938781	0
Title:	opx1a	(from	opx1	at	1160	giving	opx-cpx+pl	at	liq)
Bulk	Composition:
Pressure	Temperature	mass	SiO2	TiO2	Al2O3	Fe2O3	Cr2O3	FeO	MnO	MgO	CaO	Na2O	K2O	H2O
2000	1500	99.9906	55.3327	0.144645	16.8307	1.20189	0.000107894	6.74269	0.21034	5.33613	8.20452	4.83979	0.104815	1.0517
2000	1500	99.9906	55.3327	0.144645	16.8307	1.20189	0.000107894	6.74269	0.21034	5.33613	8.20452	4.83979	0.104815	1.0517
2000	1495	99.9906	55.3327	0.144645	16.8307	1.20197	0.000107894	6.74263	0.21034	5.33613	8.20452	4.83979	0.104815	1.0517
2000	1490	99.9906	55.3327	0.144645	16.8307	1.20207	0.000107894	6.74253	0.21034	5.33613	8.20452	4.83979	0.104815	1.0517
2000	1485	99.9907	55.3327	0.144645	16.8307	1.2022	0.000107894	6.74241	0.21034	5.33613	8.20452	4.83979	0.104815	1.0517
2000	1480	99.9907	55.3327	0.144644	16.8307	1.20236	0.000107894	6.74226	0.21034	5.33613	8.20452	4.83979	0.104815	1.0517
2000	1475	99.9907	55.3327	0.144644	16.8307	1.20256	0.000107894	6.74209	0.21034	5.33613	8.20451	4.83979	0.104815	1.0517
2000	1470	99.9907	55.3326	0.144644	16.8307	1.20278	0.000107894	6.74189	0.21034	5.33613	8.20451	4.83979	0.104815	1.0517
2000	1465	99.9907	55.3326	0.144644	16.8307	1.20303	0.000107894	6.74166	0.210339	5.33612	8.20451	4.83979	0.104815	1.0517
2000	1460	99.9908	55.3326	0.144644	16.8307	1.20331	0.000107894	6.7414	0.210339	5.33612	8.20451	4.83979	0.104815	1.0517
2000	1455	99.9908	55.3326	0.144644	16.8306	1.20362	0.000107894	6.74112	0.210339	5.33612	8.2045	4.83979	0.104815	1.0517
2000	1450	99.9908	55.3326	0.144644	16.8306	1.20397	0.000107894	6.74081	0.210339	5.33612	8.2045	4.83978	0.104815	1.0517
2000	1445	99.9909	55.3326	0.144644	16.8306	1.20434	0.000107894	6.74047	0.210339	5.33612	8.2045	4.83978	0.104815	1.0517
2000	1440	99.9909	55.3325	0.144644	16.8306	1.20475	0.000107894	6.7401	0.210339	5.33612	8.2045	4.83978	0.104815	1.0517
2000	1435	99.991	55.3325	0.144644	16.8306	1.20519	0.000107894	6.7397	0.210339	5.33611	8.20449	4.83978	0.104814	1.0517
2000	1430	99.991	55.3325	0.144644	16.8306	1.20566	0.000107894	6.73927	0.210339	5.33611	8.20449	4.83978	0.104814	1.05169
2000	1425	99.9911	55.3325	0.144644	16.8306	1.20616	0.000107894	6.73881	0.210339	5.33611	8.20448	4.83977	0.104814	1.05169
2000	1420	99.9911	55.3324	0.144644	16.8306	1.2067	0.000107894	6.73833	0.210339	5.3361	8.20448	4.83977	0.104814	1.05169
2000	1415	99.9912	55.3324	0.144644	16.8306	1.20728	0.000107894	6.73781	0.210339	5.3361	8.20447	4.83977	0.104814	1.05169
2000	1410	99.9912	55.3324	0.144644	16.8306	1.20788	0.000107893	6.73725	0.210338	5.3361	8.20447	4.83977	0.104814	1.05169
2000	1405	99.9913	55.3323	0.144644	16.8306	1.20852	0.000107893	6.73667	0.210338	5.33609	8.20446	4.83976	0.104814	1.05169
2000	1400	99.9914	55.3323	0.144644	16.8306	1.2092	0.000107893	6.73606	0.210338	5.33609	8.20446	4.83976	0.104814	1.05169
2000	1395	99.9914	55.3322	0.144643	16.8305	1.20991	0.000107893	6.73541	0.210338	5.33609	8.20445	4.83976	0.104814	1.05169
2000	1390	99.9915	55.3322	0.144643	16.8305	1.21066	0.000107893	6.73473	0.210338	5.33608	8.20445	4.83975	0.104814	1.05169
2000	1385	99.9916	55.3322	0.144643	16.8305	1.21145	0.000107893	6.73402	0.210338	5.33608	8.20444	4.83975	0.104814	1.05169
2000	1380	99.9917	55.3321	0.144643	16.8305	1.21227	0.000107893	6.73327	0.210338	5.33607	8.20443	4.83974	0.104814	1.05169
2000	1375	99.9917	55.3321	0.144643	16.8305	1.21313	0.000107893	6.73249	0.210337	5.33607	8.20443	4.83974	0.104814	1.05169
2000	1370	99.9918	55.332	0.144643	16.8305	1.21403	0.000107893	6.73168	0.210337	5.33607	8.20442	4.83974	0.104814	1.05169
2000	1365	99.9919	55.332	0.144643	16.8305	1.21497	0.000107893	6.73082	0.210337	5.33606	8.20441	4.83973	0.104813	1.05168
2000	1360	99.992	55.3319	0.144643	16.8304	1.21594	0.000107893	6.72994	0.210337	5.33606	8.2044	4.83973	0.104813	1.05168
2000	1355	99.9921	55.3319	0.144642	16.8304	1.21696	0.000107892	6.72902	0.210337	5.33605	8.2044	4.83972	0.104813	1.05168
2000	1350	99.9922	55.3318	0.144642	16.8304	1.21801	0.000107892	6.72806	0.210336	5.33604	8.20439	4.83972	0.104813	1.05168
2000	1345	99.9923	55.3317	0.144642	16.8304	1.21911	0.000107892	6.72706	0.210336	5.33604	8.20438	4.83971	0.104813	1.05168
2000	1340	99.9925	55.3317	0.144642	16.8304	1.22025	0.000107892	6.72603	0.210336	5.33603	8.20437	4.8397	0.104813	1.05168
2000	1335	99.9926	55.3316	0.144642	16.8303	1.22143	0.000107892	6.72496	0.210336	5.33603	8.20436	4.8397	0.104813	1.05168
2000	1330	99.9927	55.3315	0.144642	16.8303	1.22265	0.000107892	6.72385	0.210335	5.33602	8.20435	4.83969	0.104813	1.05168
2000	1325	99.9928	55.3315	0.144641	16.8303	1.22392	0.000107892	6.7227	0.210335	5.33601	8.20434	4.83969	0.104813	1.05168
2000	1320	99.993	55.3314	0.144641	16.8303	1.22523	0.000107892	6.72151	0.210335	5.33601	8.20433	4.83968	0.104812	1.05167
2000	1315	99.9931	55.3313	0.144641	16.8303	1.22658	0.000107891	6.72028	0.210335	5.336	8.20432	4.83967	0.104812	1.05167
2000	1310	99.9932	55.3312	0.144641	16.8302	1.22798	0.000107891	6.71901	0.210334	5.33599	8.2043	4.83967	0.104812	1.05167
2000	1305	99.9934	55.3312	0.144641	16.8302	1.22943	0.000107891	6.7177	0.210334	5.33598	8.20429	4.83966	0.104812	1.05167
2000	1300	99.9935	55.3311	0.14464	16.8302	1.23092	0.000107891	6.71634	0.210334	5.33598	8.20428	4.83965	0.104812	1.05167
2000	1295	99.9937	55.331	0.14464	16.8302	1.23246	0.000107891	6.71495	0.210333	5.33597	8.20427	4.83965	0.104812	1.05167
2000	1290	99.9938	55.3309	0.14464	16.8301	1.23405	0.000107891	6.71351	0.210333	5.33596	8.20425	4.83964	0.104811	1.05166
2000	1285	99.994	55.3308	0.14464	16.8301	1.23568	0.00010789	6.71202	0.210333	5.33595	8.20424	4.83963	0.104811	1.05166
2000	1280	99.9942	55.3307	0.144639	16.8301	1.23736	0.00010789	6.7105	0.210332	5.33594	8.20423	4.83962	0.104811	1.05166
2000	1275	99.9944	55.3306	0.144639	16.8301	1.2391	0.00010789	6.70892	0.210332	5.33593	8.20421	4.83961	0.104811	1.05166
2000	1270	99.9945	55.3305	0.144639	16.83	1.24088	0.00010789	6.7073	0.210331	5.33592	8.2042	4.8396	0.104811	1.05166
2000	1265	99.9947	55.3304	0.144639	16.83	1.24272	0.00010789	6.70564	0.210331	5.33591	8.20418	4.8396	0.104811	1.05166
2000	1260	99.9949	55.3303	0.144638	16.83	1.24461	0.000107889	6.70392	0.210331	5.3359	8.20417	4.83959	0.10481	1.05165
2000	1255	99.9951	55.3302	0.144638	16.8299	1.24655	0.000107889	6.70216	0.21033	5.33589	8.20415	4.83958	0.10481	1.05165
2000	1250	99.9953	55.3301	0.144638	16.8299	1.24854	0.000107889	6.70035	0.21033	5.33588	8.20414	4.83957	0.10481	1.05165
2000	1245	99.9955	55.33	0.144637	16.8299	1.25059	0.000107889	6.69849	0.210329	5.33587	8.20412	4.83956	0.10481	1.05165
2000	1240	99.9957	55.3299	0.144637	16.8298	1.2527	0.000107889	6.69658	0.210329	5.33586	8.2041	4.83955	0.104809	1.05165
2000	1235	99.9959	55.3297	0.144637	16.8298	1.25486	0.000107888	6.69461	0.210329	5.33585	8.20408	4.83954	0.104809	1.05164
2000	1230	99.9962	55.3296	0.144637	16.8297	1.25708	0.000107888	6.6926	0.210328	5.33584	8.20406	4.83953	0.104809	1.05164
2000	1225	99.9964	55.3295	0.144636	16.8297	1.25936	0.000107888	6.69053	0.210328	5.33582	8.20405	4.83952	0.104809	1.05164
2000	1220	99.9966	55.3294	0.144636	16.8297	1.26169	0.000107888	6.68841	0.210327	5.33581	8.20403	4.8395	0.104809	1.05164
2000	1215	99.9969	55.3292	0.144636	16.8296	1.26409	0.000107887	6.68624	0.210327	5.3358	8.20401	4.83949	0.104808	1.05163
2000	1210	99.9971	55.3291	0.144635	16.8296	1.26655	0.000107887	6.68401	0.210326	5.33578	8.20399	4.83948	0.104808	1.05163
2000	1205	99.9974	55.329	0.144635	16.8295	1.26907	0.000107887	6.68172	0.210326	5.33577	8.20397	4.83947	0.104808	1.05163
2000	1200	99.9976	55.3288	0.144634	16.8295	1.27165	0.000107887	6.67937	0.210325	5.33576	8.20395	4.83946	0.104807	1.05163
2000	1195	99.9979	55.3287	0.144634	16.8295	1.2743	0.000107886	6.67697	0.210324	5.33574	8.20392	4.83944	0.104807	1.05162
2000	1190	99.9982	55.3285	0.144634	16.8294	1.27701	0.000107886	6.67451	0.210324	5.33573	8.2039	4.83943	0.104807	1.05162
2000	1185	99.9984	55.3284	0.144633	16.8294	1.27979	0.000107886	6.67199	0.210323	5.33571	8.20388	4.83942	0.104807	1.05162
2000	1180	99.9987	55.3282	0.144633	16.8293	1.28264	0.000107885	6.6694	0.210323	5.3357	8.20385	4.8394	0.104806	1.05161
2000	1175	99.999	55.328	0.144632	16.8293	1.28555	0.000107885	6.66676	0.210322	5.33568	8.20383	4.83939	0.104806	1.05161
2000	1170	99.9993	55.3279	0.144632	16.8292	1.28854	0.000107885	6.66405	0.210321	5.33567	8.20381	4.83937	0.104806	1.05161
2000	1165	99.9996	55.3277	0.144632	16.8292	1.29159	0.000107884	6.66127	0.210321	5.33565	8.20378	4.83936	0.104805	1.0516
2000	1160	99.9999	55.3275	0.144631	16.8291	1.29472	0.000107884	6.65843	0.21032	5.33563	8.20376	4.83934	0.104805	1.0516
2000	1155	99.9987	55.3282	0.144633	16.8293	1.28267	0.000107885	6.66938	0.210323	5.3357	8.20385	4.8394	0.104806	1.05161
2000	1150	95.2018	55.4981	0.151047	16.7149	1.31348	0.000113321	6.82126	0.22092	5.10788	7.97953	4.97852	0.109684	1.1046
2000	1145	90.8011	55.6705	0.157488	16.6005	1.3419	0.000118814	6.95621	0.231627	4.89023	7.76244	5.11628	0.114587	1.15814
2000	1140	86.722	55.8449	0.164031	16.4814	1.3704	0.000124402	7.076	0.242522	4.67802	7.55725	5.2532	0.119547	1.21261
2000	1135	83.0051	56.0149	0.170517	16.3587	1.39857	0.000129973	7.19242	0.253382	4.47517	7.35868	5.38612	0.124462	1.26691
2000	1130	79.6026	56.1807	0.176952	16.2328	1.42646	0.000135528	7.3056	0.264212	4.28095	7.16651	5.51526	0.129335	1.32106
2000	1125	76.4754	56.3424	0.18334	16.1038	1.45411	0.00014107	7.41578	0.275016	4.09495	6.98048	5.64074	0.134165	1.37508
2000	1120	73.5907	56.5	0.189685	15.9719	1.48158	0.0001466	7.52316	0.285797	3.91676	6.80036	5.7627	0.138955	1.42899
2000	1115	70.9204	56.6536	0.195993	15.8372	1.5089	0.00015212	7.62791	0.296558	3.74601	6.6259	5.88126	0.143706	1.48279
2000	1110	68.4408	56.8033	0.202268	15.6999	1.5361	0.000157631	7.73022	0.307302	3.58232	6.45688	5.99656	0.148419	1.53651
2000	1105	66.1314	56.9493	0.208513	15.5602	1.56321	0.000163136	7.83023	0.318034	3.42536	6.29309	6.1087	0.153095	1.59017
2000	1100	63.9745	57.0915	0.214734	15.4181	1.59026	0.000168636	7.92808	0.328756	3.27479	6.13432	6.2178	0.157737	1.64378
2000	1095	61.9548	57.2301	0.220933	15.2738	1.61728	0.000174133	8.02388	0.339473	3.13033	5.98037	6.32397	0.162344	1.69737
2000	1090	60.059	57.3652	0.227116	15.1274	1.64429	0.00017963	8.11776	0.350189	2.99166	5.83106	6.42732	0.166919	1.75094
2000	1085	58.2755	57.4968	0.233285	14.979	1.67131	0.000185128	8.20981	0.360907	2.85853	5.68621	6.52795	0.171462	1.80453
2000	1080	56.5939	57.625	0.239445	14.8288	1.69837	0.000190628	8.30012	0.37163	2.73067	5.54564	6.62596	0.175975	1.85815
2000	1075	55.0052	57.7499	0.245599	14.6769	1.72549	0.000196134	8.38877	0.382364	2.60783	5.40921	6.72144	0.180459	1.91182
2000	1070	53.5015	57.8716	0.251751	14.5234	1.75267	0.000201647	8.47582	0.39311	2.48978	5.27674	6.81449	0.184914	1.96555
2000	1065	52.0756	57.9902	0.257903	14.3683	1.77995	0.000207168	8.56133	0.403874	2.3763	5.14809	6.90519	0.189342	2.01937
2000	1060	50.7213	58.1057	0.26406	14.2117	1.80732	0.0002127	8.64536	0.414658	2.26719	5.02313	6.99364	0.193743	2.07329
2000	1055	49.4327	58.2182	0.270224	14.0538	1.83481	0.000218244	8.72795	0.425467	2.16225	4.9017	7.07991	0.198118	2.12733
2000	1050	48.205	58.3278	0.276398	13.8947	1.86243	0.000223803	8.80912	0.436303	2.0613	4.78368	7.16409	0.202468	2.18152
2000	1045	47.0335	58.4346	0.282585	13.7343	1.89018	0.000229377	8.88891	0.447171	1.96415	4.66895	7.24625	0.206794	2.23585
2000	1040	45.9141	58.5386	0.288787	13.5729	1.91808	0.000234969	8.96733	0.458073	1.87064	4.55739	7.32648	0.211096	2.29036
2000	1035	44.8431	58.64	0.295007	13.4104	1.94614	0.000240581	9.0444	0.469013	1.78061	4.44887	7.40485	0.215375	2.34507
2000	1030	43.8171	58.7388	0.301248	13.247	1.97436	0.000246214	9.12012	0.479995	1.69393	4.34328	7.48143	0.219631	2.39997
2000	1025	42.8332	58.835	0.30751	13.0828	2.00274	0.00025187	9.19447	0.491021	1.61043	4.24053	7.55628	0.223864	2.45511
2000	1020	41.8884	58.9288	0.313798	12.9177	2.0313	0.000257551	9.26747	0.502096	1.53	4.14049	7.6295	0.228076	2.51048
2000	1015	40.9803	59.0203	0.320112	12.7519	2.06004	0.000263258	9.33908	0.513222	1.45251	4.04307	7.70113	0.232266	2.56611
2000	1010	40.1064	59.1095	0.326455	12.5854	2.08896	0.000268994	9.4093	0.524405	1.37783	3.94818	7.77126	0.236435	2.62203
2000	1005	39.2648	59.1963	0.332827	12.4182	2.12284	0.00027476	9.47374	0.535645	1.30585	3.85569	7.83991	0.240583	2.67822
2000	1000	38.4477	59.2858	0.337977	12.2498	2.19577	0.000140513	9.49411	0.547029	1.23643	3.76508	7.90791	0.244742	2.73514
2000	995	37.5864	59.4537	0.328485	12.0813	2.27989	0	9.41916	0.559564	1.1698	3.67514	7.9858	0.249322	2.79782
2000	990	36.6515	59.7445	0.29882	11.9135	2.28325	0	9.29033	0.573837	1.10688	3.58567	8.07944	0.254555	2.86918
2000	985	35.7496	60.0436	0.269256	11.7448	2.27749	0	9.15645	0.588314	1.04722	3.49888	8.17262	0.259813	2.94157
2000	980	34.8887	60.3385	0.241785	11.5752	2.27153	0	9.0219	0.602831	0.990556	3.41487	8.26366	0.265028	3.01415
2000	975	34.0651	60.6311	0.216297	11.405	2.24339	0	8.90636	0.617407	0.936745	3.33356	8.3529	0.270208	3.08703
2000	970	33.267	60.9619	0.194433	11.232	2.21566	0	8.75826	0.621469	0.884972	3.25578	8.43908	0.275386	3.16109
2000	965	32.4699	61.3038	0.175796	11.0494	2.19823	0	8.5833	0.622041	0.829364	3.19246	8.52616	0.280736	3.2387
2000	960	31.7051	61.643	0.158659	10.8663	2.17999	0	8.40703	0.622187	0.776497	3.13154	8.61195	0.286065	3.31682
2000	955	30.971	61.9793	0.142922	10.6829	2.16094	0	8.22958	0.62194	0.726268	3.07284	8.69652	0.291372	3.39544
2000	950	30.2659	62.313	0.128491	10.4991	2.14106	0	8.05109	0.621329	0.678581	3.01623	8.7799	0.296655	3.47454
2000	945	29.5883	62.644	0.115276	10.3152	2.12038	0	7.87172	0.620389	0.633344	2.96156	8.86214	0.301914	3.55411
2000	940	28.9369	62.9723	0.103194	10.1311	2.09889	0	7.69165	0.619151	0.590468	2.9087	8.94324	0.307145	3.63412
2000	935	28.3104	63.298	0.0921664	9.94703	2.07661	0	7.51106	0.617648	0.549866	2.85754	9.02325	0.312346	3.71454
2000	930	27.7077	63.6209	0.0821183	9.76295	2.05356	0	7.33014	0.615914	0.511453	2.80795	9.10217	0.317516	3.79534
2000	925	27.1276	63.9411	0.07298	9.57896	2.02975	0	7.14911	0.613981	0.475146	2.75984	9.18001	0.322651	3.87649
2000	920	26.5692	64.2585	0.0646857	9.39513	2.00522	0	6.96816	0.611882	0.440865	2.71309	9.25677	0.32775	3.95796
2000	915	26.0316	64.573	0.0571735	9.21151	1.97999	0	6.78751	0.60965	0.408529	2.66762	9.33246	0.332808	4.03971
2000	910	25.5137	64.8847	0.050385	9.02818	1.95408	0	6.60737	0.607317	0.378059	2.62333	9.40707	0.337824	4.12171
2000	905	25.0148	65.1933	0.0442655	8.84519	1.92754	0	6.42795	0.604914	0.349379	2.58015	9.48059	0.342795	4.20391
2000	900	24.5341	65.4989	0.0387635	8.66261	1.90038	0	6.24947	0.602471	0.322412	2.53799	9.55302	0.347717	4.28628
