# Supplementary material for: A 5-km-thick reservoir with > 380,000 km3 of magma within the ancient Earth's crust
Source: Sci Rep. 2022 Sep 19;12:15651. doi: 10.1038/s41598-022-19915-w (PMC9485162; doi:10.1038/s41598-022-19915-w)
Supplement: Supplementary file 15 — Supplementary Information 15. [file 41598_2022_19915_MOESM15_ESM.xlsx]

## Sheet: O10R90
SupplTable S4B-1: Fractional crystallization of the mix O10R90
Mix ratio: O10R90
System	Thermodynamic	Data:
Pressure	Temperature	mass	F	phi	S	H	V	dVdP*10^6	dVdT*10^6	Cp	logfO2(absolute)	logfO2-QFM	rhol	rhos	viscosity	aH2O	chisqr
2000	1400	99.992	1	1	297.847	-1.21029e+06	40.4127	-392.585	3551.25	149.037	-6.318	0	2.47427	0	1.97	0.114127	0
2000	1400	99.992	1	1	297.847	-1.21029e+06	40.4127	-392.585	3551.25	149.037	-6.318	0	2.47427	0	1.97	0.114127	0
2000	1399	99.992	1	1	297.758	-1.21044e+06	40.4092	-392.499	3551.09	149.037	-6.327	0	2.47449	0	1.973	0.114103	0
2000	1398	99.992	1	1	297.669	-1.21059e+06	40.4057	-392.412	3550.92	149.037	-6.336	0	2.4747	0	1.977	0.114079	0
2000	1397	99.992	1	1	297.58	-1.21074e+06	40.4021	-392.326	3550.75	149.036	-6.345	0	2.47492	0	1.981	0.114055	0
2000	1396	99.992	1	1	297.491	-1.21089e+06	40.3986	-392.239	3550.58	149.036	-6.353	0	2.47514	0	1.985	0.11403	0
2000	1395	99.992	1	1	297.401	-1.21104e+06	40.3951	-392.153	3550.41	149.035	-6.362	0	2.47535	0	1.989	0.114006	0
2000	1394	99.9921	1	1	297.312	-1.21119e+06	40.3915	-392.066	3550.25	149.035	-6.371	0	2.47557	0	1.992	0.113982	0
2000	1393	99.9921	1	1	297.223	-1.21134e+06	40.388	-391.98	3550.08	149.034	-6.38	0	2.47579	0	1.996	0.113958	0
2000	1392	99.9921	1	1	297.133	-1.21149e+06	40.3844	-391.894	3549.9	149.034	-6.388	0	2.476	0	2	0.113934	0
2000	1391	99.9921	1	1	297.044	-1.21164e+06	40.3809	-391.807	3549.73	149.033	-6.397	0	2.47622	0	2.004	0.11391	0
2000	1390	99.9921	1	1	296.954	-1.21179e+06	40.3774	-391.721	3549.56	149.033	-6.406	0	2.47644	0	2.008	0.113886	0
2000	1389	99.9921	1	1	296.865	-1.21193e+06	40.3738	-391.635	3549.39	149.033	-6.415	0	2.47666	0	2.012	0.113862	0
2000	1388	99.9921	1	1	296.775	-1.21208e+06	40.3703	-391.549	3549.21	149.032	-6.424	0	2.47687	0	2.015	0.113838	0
2000	1387	99.9922	1	1	296.685	-1.21223e+06	40.3668	-391.462	3549.04	149.032	-6.433	0	2.47709	0	2.019	0.113814	0
2000	1386	99.9922	1	1	296.595	-1.21238e+06	40.3632	-391.376	3548.86	149.031	-6.442	0	2.47731	0	2.023	0.11379	0
2000	1385	99.9922	1	1	296.506	-1.21253e+06	40.3597	-391.29	3548.69	149.031	-6.45	0	2.47753	0	2.027	0.113766	0
2000	1384	99.9922	1	1	296.416	-1.21268e+06	40.3562	-391.204	3548.51	149.03	-6.459	0	2.47774	0	2.031	0.113742	0
2000	1383	99.9922	1	1	296.326	-1.21283e+06	40.3526	-391.118	3548.34	149.03	-6.468	0	2.47796	0	2.035	0.113718	0
2000	1382	99.9922	1	1	296.236	-1.21298e+06	40.3491	-391.032	3548.16	149.029	-6.477	0	2.47818	0	2.039	0.113694	0
2000	1381	99.9923	1	1	296.146	-1.21313e+06	40.3456	-390.946	3547.98	149.029	-6.486	0	2.47839	0	2.042	0.11367	0
2000	1380	99.9923	1	1	296.056	-1.21328e+06	40.342	-390.859	3547.8	149.029	-6.495	0	2.47861	0	2.046	0.113646	0
2000	1379	99.9923	1	1	295.966	-1.21343e+06	40.3385	-390.773	3547.62	149.028	-6.504	0	2.47883	0	2.05	0.113622	0
2000	1378	99.9923	1	1	295.875	-1.21358e+06	40.335	-390.687	3547.44	149.028	-6.513	0	2.47905	0	2.054	0.113598	0
2000	1377	99.9923	1	1	295.785	-1.21373e+06	40.3314	-390.601	3547.26	149.027	-6.522	0	2.47926	0	2.058	0.113575	0
2000	1376	99.9923	1	1	295.695	-1.21388e+06	40.3279	-390.515	3547.08	149.027	-6.531	0	2.47948	0	2.062	0.113551	0
2000	1375	99.9924	1	1	295.605	-1.21402e+06	40.3244	-390.429	3546.89	149.026	-6.54	0	2.4797	0	2.066	0.113527	0
2000	1374	99.9924	1	1	295.514	-1.21417e+06	40.3208	-390.344	3546.71	149.026	-6.549	0	2.47992	0	2.07	0.113503	0
2000	1373	99.9924	1	1	295.424	-1.21432e+06	40.3173	-390.258	3546.53	149.025	-6.558	0	2.48014	0	2.074	0.113479	0
2000	1372	99.9924	1	1	295.333	-1.21447e+06	40.3138	-390.172	3546.34	149.025	-6.567	0	2.48035	0	2.077	0.113455	0
2000	1371	99.9924	1	1	295.243	-1.21462e+06	40.3103	-390.086	3546.16	149.025	-6.576	0	2.48057	0	2.081	0.113431	0
2000	1370	99.9925	1	1	295.152	-1.21477e+06	40.3067	-390	3545.97	149.024	-6.585	0	2.48079	0	2.085	0.113407	0
2000	1369	99.9925	1	1	295.061	-1.21492e+06	40.3032	-389.914	3545.78	149.024	-6.594	0	2.48101	0	2.089	0.113383	0
2000	1368	99.9925	1	1	294.971	-1.21507e+06	40.2997	-389.828	3545.6	149.023	-6.603	0	2.48122	0	2.093	0.113359	0
2000	1367	99.9925	1	1	294.88	-1.21522e+06	40.2961	-389.743	3545.41	149.023	-6.612	0	2.48144	0	2.097	0.113335	0
2000	1366	99.9925	1	1	294.789	-1.21537e+06	40.2926	-389.657	3545.22	149.022	-6.621	0	2.48166	0	2.101	0.113312	0
2000	1365	99.9925	1	1	294.698	-1.21552e+06	40.2891	-389.571	3545.03	149.022	-6.63	0	2.48188	0	2.105	0.113288	0
2000	1364	99.9926	1	1	294.607	-1.21567e+06	40.2856	-389.486	3544.84	149.022	-6.64	0	2.4821	0	2.109	0.113264	0
2000	1363	99.9926	1	1	294.516	-1.21582e+06	40.282	-389.4	3544.65	149.021	-6.649	0	2.48231	0	2.113	0.11324	0
2000	1362	99.9926	1	1	294.425	-1.21597e+06	40.2785	-389.314	3544.46	149.021	-6.658	0	2.48253	0	2.117	0.113216	0
2000	1361	99.9926	1	1	294.334	-1.21611e+06	40.275	-389.229	3544.26	149.02	-6.667	0	2.48275	0	2.121	0.113192	0
2000	1360	99.9926	1	1	294.243	-1.21626e+06	40.2714	-389.143	3544.07	149.02	-6.676	0	2.48297	0	2.125	0.113169	0
2000	1359	99.9927	1	1	294.151	-1.21641e+06	40.2679	-389.057	3543.88	149.02	-6.685	0	2.48318	0	2.129	0.113145	0
2000	1358	99.9927	1	1	294.06	-1.21656e+06	40.2644	-388.972	3543.68	149.019	-6.694	0	2.4834	0	2.133	0.113121	0
2000	1357	99.9927	1	1	293.969	-1.21671e+06	40.2609	-388.886	3543.49	149.019	-6.704	0	2.48362	0	2.137	0.113097	0
2000	1356	99.9927	1	1	293.877	-1.21686e+06	40.2573	-388.801	3543.29	149.018	-6.713	0	2.48384	0	2.141	0.113073	0
2000	1355	99.9928	1	1	293.786	-1.21701e+06	40.2538	-388.715	3543.1	149.018	-6.722	0	2.48406	0	2.145	0.11305	0
2000	1354	99.9928	1	1	293.695	-1.21716e+06	40.2503	-388.63	3542.9	149.017	-6.731	0	2.48427	0	2.149	0.113026	0
2000	1353	99.9928	1	1	293.603	-1.21731e+06	40.2468	-388.544	3542.7	149.017	-6.741	0	2.48449	0	2.153	0.113002	0
2000	1352	99.9928	1	1	293.511	-1.21746e+06	40.2433	-388.459	3542.5	149.017	-6.75	0	2.48471	0	2.157	0.112978	0
2000	1351	99.9928	1	1	293.42	-1.21761e+06	40.2397	-388.374	3542.3	149.016	-6.759	0	2.48493	0	2.161	0.112955	0
2000	1350	99.9929	1	1	293.328	-1.21776e+06	40.2362	-388.288	3542.1	149.016	-6.768	0	2.48515	0	2.165	0.112931	0
2000	1349	99.9929	1	1	293.236	-1.21791e+06	40.2327	-388.203	3541.9	149.015	-6.778	0	2.48536	0	2.169	0.112907	0
2000	1348	99.9929	1	1	293.144	-1.21806e+06	40.2292	-388.118	3541.7	149.015	-6.787	0	2.48558	0	2.173	0.112883	0
2000	1347	99.9929	1	1	293.052	-1.21821e+06	40.2256	-388.032	3541.5	149.015	-6.796	0	2.4858	0	2.177	0.11286	0
2000	1346	99.9929	1	1	292.96	-1.21835e+06	40.2221	-387.947	3541.3	149.014	-6.806	0	2.48602	0	2.181	0.112836	0
2000	1345	99.993	1	1	292.868	-1.2185e+06	40.2186	-387.862	3541.09	149.014	-6.815	0	2.48624	0	2.185	0.112812	0
2000	1344	99.993	1	1	292.776	-1.21865e+06	40.2151	-387.776	3540.89	149.013	-6.824	0	2.48645	0	2.189	0.112789	0
2000	1343	99.993	1	1	292.684	-1.2188e+06	40.2116	-387.691	3540.69	149.013	-6.834	0	2.48667	0	2.193	0.112765	0
2000	1342	99.993	1	1	292.592	-1.21895e+06	40.208	-387.606	3540.48	149.013	-6.843	0	2.48689	0	2.197	0.112741	0
2000	1341	99.9931	1	1	292.5	-1.2191e+06	40.2045	-387.521	3540.27	149.012	-6.852	0	2.48711	0	2.201	0.112718	0
2000	1340	99.9931	1	1	292.408	-1.21925e+06	40.201	-387.436	3540.07	149.012	-6.862	0	2.48733	0	2.205	0.112694	0
2000	1339	99.9931	1	1	292.315	-1.2194e+06	40.1975	-387.351	3539.86	149.011	-6.871	0	2.48755	0	2.209	0.11267	0
2000	1338	99.9931	1	1	292.223	-1.21955e+06	40.194	-387.266	3539.65	149.011	-6.88	0	2.48777	0	2.214	0.112647	0
2000	1337	99.9932	1	1	292.13	-1.2197e+06	40.1904	-387.18	3539.44	149.011	-6.89	0	2.48798	0	2.218	0.112623	0
2000	1336	99.9932	1	1	292.038	-1.21985e+06	40.1869	-387.095	3539.23	149.01	-6.899	0	2.4882	0	2.222	0.1126	0
2000	1335	99.9932	1	1	291.945	-1.22e+06	40.1834	-387.01	3539.02	149.01	-6.909	0	2.48842	0	2.226	0.112576	0
2000	1334	99.9932	1	1	291.853	-1.22015e+06	40.1799	-386.925	3538.81	149.009	-6.918	0	2.48864	0	2.23	0.112552	0
2000	1333	99.9933	1	1	291.76	-1.2203e+06	40.1764	-386.84	3538.6	149.009	-6.928	0	2.48886	0	2.234	0.112529	0
2000	1332	99.9933	1	1	291.667	-1.22045e+06	40.1729	-386.756	3538.39	149.009	-6.937	0	2.48908	0	2.238	0.112505	0
2000	1331	99.9933	1	1	291.574	-1.22059e+06	40.1693	-386.671	3538.18	149.008	-6.947	0	2.48929	0	2.242	0.112482	0
2000	1330	99.9933	1	1	291.482	-1.22074e+06	40.1658	-386.586	3537.96	149.008	-6.956	0	2.48951	0	2.246	0.112458	0
2000	1329	99.9934	1	1	291.389	-1.22089e+06	40.1623	-386.501	3537.75	149.007	-6.966	0	2.48973	0	2.251	0.112435	0
2000	1328	99.9934	1	1	291.296	-1.22104e+06	40.1588	-386.416	3537.53	149.007	-6.975	0	2.48995	0	2.255	0.112411	0
2000	1327	99.9934	1	1	291.203	-1.22119e+06	40.1553	-386.331	3537.32	149.007	-6.985	0	2.49017	0	2.259	0.112388	0
2000	1326	99.9934	1	1	291.11	-1.22134e+06	40.1518	-386.246	3537.1	149.006	-6.994	0	2.49039	0	2.263	0.112364	0
2000	1325	99.9935	1	1	291.016	-1.22149e+06	40.1482	-386.162	3536.88	149.006	-7.004	0	2.49061	0	2.267	0.112341	0
2000	1324	99.9935	1	1	290.923	-1.22164e+06	40.1447	-386.077	3536.67	149.006	-7.013	0	2.49082	0	2.271	0.112317	0
2000	1323	99.9935	1	1	290.83	-1.22179e+06	40.1412	-385.992	3536.45	149.005	-7.023	0	2.49104	0	2.275	0.112294	0
2000	1322	99.9935	1	1	290.737	-1.22194e+06	40.1377	-385.907	3536.23	149.005	-7.033	0	2.49126	0	2.28	0.11227	0
2000	1321	99.9936	1	1	290.643	-1.22209e+06	40.1342	-385.823	3536.01	149.004	-7.042	0	2.49148	0	2.284	0.112247	0
2000	1320	99.9936	1	1	290.55	-1.22224e+06	40.1307	-385.738	3535.79	149.004	-7.052	0	2.4917	0	2.288	0.112224	0
2000	1319	99.9936	1	1	290.456	-1.22239e+06	40.1272	-385.653	3535.57	149.004	-7.062	0	2.49192	0	2.292	0.1122	0
2000	1318	99.9936	1	1	290.363	-1.22254e+06	40.1237	-385.569	3535.34	149.003	-7.071	0	2.49214	0	2.296	0.112177	0
2000	1317	99.9937	1	1	290.269	-1.22269e+06	40.1202	-385.484	3535.12	149.003	-7.081	0	2.49235	0	2.301	0.112153	0
2000	1316	99.9937	1	1	290.175	-1.22284e+06	40.1166	-385.4	3534.9	149.003	-7.09	0	2.49257	0	2.305	0.11213	0
2000	1315	99.9937	1	1	290.082	-1.22298e+06	40.1131	-385.315	3534.67	149.002	-7.1	0	2.49279	0	2.309	0.112107	0
2000	1314	99.9938	1	1	289.988	-1.22313e+06	40.1096	-385.231	3534.45	149.002	-7.11	0	2.49301	0	2.313	0.112083	0
2000	1313	99.9938	1	1	289.894	-1.22328e+06	40.1061	-385.146	3534.22	149.001	-7.12	0	2.49323	0	2.317	0.11206	0
2000	1312	99.9938	1	1	289.8	-1.22343e+06	40.1026	-385.062	3534	149.001	-7.129	0	2.49345	0	2.322	0.112037	0
2000	1311	99.9938	1	1	289.706	-1.22358e+06	40.0991	-384.977	3533.77	149.001	-7.139	0	2.49367	0	2.326	0.112013	0
2000	1310	99.9939	1	1	289.612	-1.22373e+06	40.0956	-384.893	3533.54	149	-7.149	0	2.49389	0	2.33	0.11199	0
2000	1309	99.9939	1	1	289.518	-1.22388e+06	40.0921	-384.808	3533.32	149	-7.159	0	2.49411	0	2.334	0.111967	0
2000	1308	99.9939	1	1	289.424	-1.22403e+06	40.0886	-384.724	3533.09	149	-7.168	0	2.49432	0	2.338	0.111944	0
2000	1307	99.994	1	1	289.33	-1.22418e+06	40.0851	-384.64	3532.86	148.999	-7.178	0	2.49454	0	2.343	0.11192	0
2000	1306	99.994	1	1	289.235	-1.22433e+06	40.0816	-384.555	3532.63	148.999	-7.188	0	2.49476	0	2.347	0.111897	0
2000	1305	99.994	1	1	289.141	-1.22448e+06	40.078	-384.471	3532.4	148.998	-7.198	0	2.49498	0	2.351	0.111874	0
2000	1304	99.994	1	1	289.047	-1.22463e+06	40.0745	-384.387	3532.17	148.998	-7.208	0	2.4952	0	2.355	0.111851	0
2000	1303	99.9941	1	1	288.952	-1.22478e+06	40.071	-384.303	3531.93	148.998	-7.217	0	2.49542	0	2.36	0.111827	0
2000	1302	99.9941	1	1	288.858	-1.22493e+06	40.0675	-384.218	3531.7	148.997	-7.227	0	2.49564	0	2.364	0.111804	0
2000	1301	99.9941	1	1	288.763	-1.22508e+06	40.064	-384.134	3531.47	148.997	-7.237	0	2.49586	0	2.368	0.111781	0
2000	1300	99.9942	1	1	288.669	-1.22523e+06	40.0605	-384.05	3531.23	148.997	-7.247	0	2.49608	0	2.373	0.111758	0
2000	1299	99.9942	1	1	288.574	-1.22538e+06	40.057	-383.966	3531	148.996	-7.257	0	2.4963	0	2.377	0.111735	0
2000	1298	99.9942	1	1	288.479	-1.22552e+06	40.0535	-383.882	3530.76	148.996	-7.267	0	2.49652	0	2.381	0.111712	0
2000	1297	99.9943	1	1	288.384	-1.22567e+06	40.05	-383.798	3530.53	148.996	-7.277	0	2.49674	0	2.385	0.111689	0
2000	1296	99.9943	1	1	288.29	-1.22582e+06	40.0465	-383.714	3530.29	148.995	-7.287	0	2.49695	0	2.39	0.111666	0
2000	1295	99.9943	1	1	288.195	-1.22597e+06	40.043	-383.63	3530.05	148.995	-7.296	0	2.49717	0	2.394	0.111643	0
2000	1294	99.9944	1	1	288.1	-1.22612e+06	40.0395	-383.546	3529.81	148.995	-7.306	0	2.49739	0	2.398	0.111619	0
2000	1293	99.9944	1	1	288.005	-1.22627e+06	40.036	-383.462	3529.58	148.994	-7.316	0	2.49761	0	2.403	0.111596	0
2000	1292	99.9944	1	1	287.91	-1.22642e+06	40.0325	-383.378	3529.34	148.994	-7.326	0	2.49783	0	2.407	0.111573	0
2000	1291	99.9945	1	1	287.814	-1.22657e+06	40.029	-383.294	3529.1	148.994	-7.336	0	2.49805	0	2.411	0.11155	0
2000	1290	99.9945	1	1	287.719	-1.22672e+06	40.0255	-383.21	3528.85	148.993	-7.346	0	2.49827	0	2.416	0.111527	0
2000	1289	99.9945	1	1	287.624	-1.22687e+06	40.022	-383.126	3528.61	148.993	-7.356	0	2.49849	0	2.42	0.111504	0
2000	1288	99.9946	1	1	287.529	-1.22702e+06	40.0185	-383.042	3528.37	148.993	-7.366	0	2.49871	0	2.424	0.111481	0
2000	1287	99.9946	1	1	287.433	-1.22717e+06	40.015	-382.958	3528.13	148.992	-7.376	0	2.49893	0	2.429	0.111459	0
2000	1286	99.9946	1	1	287.338	-1.22732e+06	40.0115	-382.875	3527.88	148.992	-7.386	0	2.49915	0	2.433	0.111436	0
2000	1285	99.9947	1	1	287.242	-1.22747e+06	40.008	-382.791	3527.64	148.992	-7.396	0	2.49937	0	2.438	0.111413	0
2000	1284	99.9947	1	1	287.147	-1.22762e+06	40.0045	-382.707	3527.39	148.991	-7.407	0	2.49959	0	2.442	0.11139	0
2000	1283	99.9947	1	1	287.051	-1.22777e+06	40.001	-382.623	3527.15	148.991	-7.417	0	2.4998	0	2.446	0.111367	0
2000	1282	99.9948	1	1	286.955	-1.22792e+06	39.9975	-382.54	3526.9	148.99	-7.427	0	2.50002	0	2.451	0.111344	0
2000	1281	99.9948	1	1	286.86	-1.22807e+06	39.994	-382.456	3526.65	148.99	-7.437	0	2.50024	0	2.455	0.111321	0
2000	1280	99.9948	1	1	286.764	-1.22822e+06	39.9905	-382.372	3526.41	148.99	-7.447	0	2.50046	0	2.459	0.111298	0
2000	1279	99.9949	1	1	286.668	-1.22836e+06	39.987	-382.289	3526.16	148.99	-7.457	0	2.50068	0	2.464	0.111276	0
2000	1278	99.9949	1	1	286.572	-1.22851e+06	39.9835	-382.205	3525.91	148.989	-7.467	0	2.5009	0	2.468	0.111253	0
2000	1277	99.9949	1	1	286.476	-1.22866e+06	39.98	-382.121	3525.66	148.989	-7.477	0	2.50112	0	2.473	0.11123	0
2000	1276	99.995	1	1	286.38	-1.22881e+06	39.9765	-382.038	3525.41	148.989	-7.488	0	2.50134	0	2.477	0.111207	0
2000	1275	99.995	1	1	286.284	-1.22896e+06	39.973	-381.954	3525.16	148.988	-7.498	0	2.50156	0	2.481	0.111185	0
2000	1274	99.995	1	1	286.187	-1.22911e+06	39.9695	-381.871	3524.91	148.988	-7.508	0	2.50178	0	2.486	0.111162	0
2000	1273	99.9951	1	1	286.091	-1.22926e+06	39.9661	-381.787	3524.65	148.988	-7.518	0	2.502	0	2.49	0.111139	0
2000	1272	99.9951	1	1	285.995	-1.22941e+06	39.9626	-381.704	3524.4	148.987	-7.528	0	2.50222	0	2.495	0.111116	0
2000	1271	99.9951	1	1	285.899	-1.22956e+06	39.9591	-381.62	3524.15	148.987	-7.539	0	2.50244	0	2.499	0.111094	0
2000	1270	99.9952	1	1	285.802	-1.22971e+06	39.9556	-381.537	3523.89	148.987	-7.549	0	2.50266	0	2.504	0.111071	0
2000	1269	99.9952	1	1	285.706	-1.22986e+06	39.9521	-381.454	3523.64	148.986	-7.559	0	2.50288	0	2.508	0.111049	0
2000	1268	99.9953	1	1	285.609	-1.23001e+06	39.9486	-381.37	3523.38	148.986	-7.57	0	2.5031	0	2.513	0.111026	0
2000	1267	99.9953	1	1	285.512	-1.23016e+06	39.9451	-381.287	3523.12	148.986	-7.58	0	2.50332	0	2.517	0.111003	0
2000	1266	99.9953	1	1	285.416	-1.23031e+06	39.9416	-381.204	3522.87	148.985	-7.59	0	2.50354	0	2.522	0.110981	0
2000	1265	99.9954	1	1	285.319	-1.23046e+06	39.9381	-381.12	3522.61	148.985	-7.6	0	2.50376	0	2.526	0.110958	0
2000	1264	99.9954	1	1	285.222	-1.23061e+06	39.9346	-381.037	3522.35	148.985	-7.611	0	2.50398	0	2.531	0.110936	0
2000	1263	99.9954	1	1	285.125	-1.23076e+06	39.9311	-380.954	3522.09	148.984	-7.621	0	2.5042	0	2.535	0.110913	0
2000	1262	99.9955	1	1	285.028	-1.23091e+06	39.9277	-380.871	3521.83	148.984	-7.632	0	2.50442	0	2.54	0.110891	0
2000	1261	99.9955	1	1	284.931	-1.23106e+06	39.9242	-380.788	3521.57	148.984	-7.642	0	2.50464	0	2.544	0.110868	0
2000	1260	99.9956	1	1	284.834	-1.23121e+06	39.9207	-380.705	3521.31	148.983	-7.652	0	2.50486	0	2.549	0.110846	0
2000	1259	99.9956	1	1	284.737	-1.23136e+06	39.9172	-380.621	3521.05	148.983	-7.663	0	2.50508	0	2.553	0.110823	0
2000	1258	99.9956	1	1	284.64	-1.2315e+06	39.9137	-380.538	3520.78	148.983	-7.673	0	2.5053	0	2.558	0.110801	0
2000	1257	99.9957	1	1	284.543	-1.23165e+06	39.9102	-380.455	3520.52	148.983	-7.684	0	2.50552	0	2.562	0.110779	0
2000	1256	99.9957	1	1	284.445	-1.2318e+06	39.9067	-380.372	3520.26	148.982	-7.694	0	2.50574	0	2.567	0.110756	0
2000	1255	99.9958	1	1	284.348	-1.23195e+06	39.9032	-380.289	3519.99	148.982	-7.704	0	2.50596	0	2.571	0.110734	0
2000	1254	99.9958	1	1	284.251	-1.2321e+06	39.8998	-380.206	3519.73	148.982	-7.715	0	2.50617	0	2.576	0.110712	0
2000	1253	99.9958	1	1	284.153	-1.23225e+06	39.8963	-380.123	3519.46	148.981	-7.725	0	2.50639	0	2.58	0.110689	0
2000	1252	99.9959	1	1	284.055	-1.2324e+06	39.8928	-380.04	3519.19	148.981	-7.736	0	2.50662	0	2.585	0.110667	0
2000	1251	99.9959	1	1	283.958	-1.23255e+06	39.8893	-379.957	3518.93	148.981	-7.746	0	2.50684	0	2.589	0.110645	0
2000	1250	99.996	1	1	283.86	-1.2327e+06	39.8858	-379.875	3518.66	148.98	-7.757	0	2.50705	0	2.594	0.110622	0
2000	1249	99.996	1	1	283.762	-1.23285e+06	39.8823	-379.792	3518.39	148.98	-7.767	0	2.50727	0	2.599	0.1106	0
2000	1248	99.996	1	1	283.665	-1.233e+06	39.8789	-379.709	3518.12	148.98	-7.778	0	2.5075	0	2.603	0.110578	0
2000	1247	99.9961	1	1	283.567	-1.23315e+06	39.8754	-379.626	3517.85	148.98	-7.789	0	2.50772	0	2.608	0.110556	0
2000	1246	99.9961	1	1	283.469	-1.2333e+06	39.8719	-379.543	3517.58	148.979	-7.799	0	2.50793	0	2.612	0.110534	0
2000	1245	99.9962	1	1	283.371	-1.23345e+06	39.8684	-379.461	3517.31	148.979	-7.81	0	2.50815	0	2.617	0.110512	0
2000	1244	99.9962	1	1	283.273	-1.2336e+06	39.8649	-379.378	3517.04	148.979	-7.82	0	2.50838	0	2.621	0.11049	0
2000	1243	99.9963	1	1	283.174	-1.23375e+06	39.8615	-379.295	3516.76	148.978	-7.831	0	2.5086	0	2.626	0.110467	0
2000	1242	99.9963	1	1	283.076	-1.2339e+06	39.858	-379.213	3516.49	148.978	-7.842	0	2.50881	0	2.631	0.110445	0
2000	1241	99.9963	1	1	282.978	-1.23405e+06	39.8545	-379.13	3516.21	148.978	-7.852	0	2.50903	0	2.635	0.110423	0
2000	1240	99.9964	1	1	282.88	-1.2342e+06	39.851	-379.047	3515.94	148.978	-7.863	0	2.50926	0	2.64	0.110401	0
2000	1239	99.9964	1	1	282.781	-1.23435e+06	39.8475	-378.965	3515.66	148.977	-7.874	0	2.50948	0	2.645	0.110379	0
2000	1238	99.9965	1	1	282.683	-1.2345e+06	39.8441	-378.882	3515.39	148.977	-7.884	0	2.5097	0	2.649	0.110357	0
2000	1237	99.9965	1	1	282.584	-1.23465e+06	39.8406	-378.8	3515.11	148.977	-7.895	0	2.50992	0	2.654	0.110335	0
2000	1236	99.9966	1	1	282.486	-1.2348e+06	39.8371	-378.717	3514.83	148.976	-7.906	0	2.51014	0	2.659	0.110314	0
2000	1235	99.9966	1	1	282.387	-1.23495e+06	39.8336	-378.635	3514.56	148.976	-7.917	0	2.51036	0	2.663	0.110292	0
2000	1234	99.9966	1	1	282.288	-1.23509e+06	39.8302	-378.552	3514.28	148.976	-7.927	0	2.51058	0	2.668	0.11027	0
2000	1233	99.9967	1	1	282.189	-1.23524e+06	39.8267	-378.47	3514	148.976	-7.938	0	2.5108	0	2.673	0.110248	0
2000	1232	99.9967	1	1	282.091	-1.23539e+06	39.8232	-378.388	3513.72	148.975	-7.949	0	2.51102	0	2.677	0.110226	0
2000	1231	99.9968	1	1	281.992	-1.23554e+06	39.8197	-378.305	3513.44	148.975	-7.96	0	2.51124	0	2.682	0.110204	0
2000	1230	99.9968	1	1	281.893	-1.23569e+06	39.8163	-378.223	3513.16	148.975	-7.97	0	2.51146	0	2.687	0.110183	0
2000	1229	99.9969	1	1	281.794	-1.23584e+06	39.8128	-378.141	3512.87	148.975	-7.981	0	2.51168	0	2.691	0.110161	0
2000	1228	99.9969	1	1	281.695	-1.23599e+06	39.8093	-378.058	3512.59	148.974	-7.992	0	2.5119	0	2.696	0.110139	0
2000	1227	99.997	1	1	281.595	-1.23614e+06	39.8058	-377.976	3512.31	148.974	-8.003	0	2.51212	0	2.701	0.110117	0
2000	1226	99.997	1	1	281.496	-1.23629e+06	39.8024	-377.894	3512.02	148.974	-8.014	0	2.51234	0	2.705	0.110096	0
2000	1225	99.9971	1	1	281.397	-1.23644e+06	39.7989	-377.812	3511.74	148.974	-8.025	0	2.51256	0	2.71	0.110074	0
2000	1224	99.9971	1	1	281.297	-1.23659e+06	39.7954	-377.73	3511.45	148.973	-8.036	0	2.51278	0	2.715	0.110053	0
2000	1223	99.9972	1	1	281.198	-1.23674e+06	39.7919	-377.647	3511.17	148.973	-8.047	0	2.513	0	2.72	0.110031	0
2000	1222	99.9972	1	1	281.098	-1.23689e+06	39.7885	-377.565	3510.88	148.973	-8.057	0	2.51322	0	2.724	0.110009	0
2000	1221	99.9972	1	1	280.999	-1.23704e+06	39.785	-377.483	3510.59	148.973	-8.068	0	2.51344	0	2.729	0.109988	0
2000	1220	99.9973	1	1	280.899	-1.23719e+06	39.7815	-377.401	3510.3	148.972	-8.079	0	2.51366	0	2.734	0.109966	0
2000	1219	99.9973	1	1	280.799	-1.23734e+06	39.7781	-377.319	3510.01	148.972	-8.09	0	2.51388	0	2.739	0.109945	0
2000	1218	99.9974	1	1	280.7	-1.23749e+06	39.7746	-377.237	3509.72	148.972	-8.101	0	2.5141	0	2.743	0.109923	0
2000	1217	99.9974	1	1	280.6	-1.23764e+06	39.7711	-377.155	3509.43	148.972	-8.112	0	2.51432	0	2.748	0.109902	0
2000	1216	99.9975	1	1	280.5	-1.23779e+06	39.7677	-377.073	3509.14	148.971	-8.123	0	2.51454	0	2.753	0.109881	0
2000	1215	99.9975	1	1	280.4	-1.23794e+06	39.7642	-376.991	3508.85	148.971	-8.134	0	2.51476	0	2.758	0.109859	0
2000	1214	99.9976	1	1	280.3	-1.23809e+06	39.7607	-376.909	3508.56	148.971	-8.145	0	2.51498	0	2.763	0.109838	0
2000	1213	99.9976	1	1	280.2	-1.23824e+06	39.7573	-376.828	3508.27	148.971	-8.156	0	2.5152	0	2.767	0.109817	0
2000	1212	99.9977	1	1	280.1	-1.23839e+06	39.7538	-376.746	3507.97	148.97	-8.168	0	2.51543	0	2.772	0.109795	0
2000	1211	99.9977	1	1	279.999	-1.23854e+06	39.7503	-376.664	3507.68	148.97	-8.179	0	2.51565	0	2.777	0.109774	0
2000	1210	99.9978	1	1	279.899	-1.23869e+06	39.7469	-376.582	3507.38	148.97	-8.19	0	2.51587	0	2.782	0.109753	0
2000	1209	99.9978	1	1	279.799	-1.23884e+06	39.7434	-376.5	3507.09	148.97	-8.201	0	2.51609	0	2.787	0.109732	0
2000	1208	99.9979	1	1	279.698	-1.23899e+06	39.7399	-376.419	3506.79	148.969	-8.212	0	2.51631	0	2.791	0.10971	0
2000	1207	99.9979	1	1	279.598	-1.23914e+06	39.7365	-376.337	3506.5	148.969	-8.223	0	2.51653	0	2.796	0.109689	0
2000	1206	99.998	1	1	279.5	-1.23928e+06	39.733	-376.255	3506.2	144.228	-8.234	0	2.51675	0	2.801	0.109668	0
2000	1205	99.998	1	1	279.402	-1.23943e+06	39.7296	-376.174	3505.9	144.226	-8.245	0	2.51697	0	2.806	0.109647	0
2000	1204	99.9981	1	1	279.305	-1.23957e+06	39.7261	-376.092	3505.6	144.225	-8.257	0	2.51719	0	2.811	0.109626	0
2000	1203	99.9981	1	1	279.207	-1.23972e+06	39.7226	-376.011	3505.3	144.224	-8.268	0	2.51741	0	2.816	0.109605	0
2000	1202	99.9982	1	1	279.11	-1.23986e+06	39.7192	-375.929	3505	144.222	-8.279	0	2.51763	0	2.821	0.109584	0
2000	1201	99.9983	1	1	279.012	-1.24001e+06	39.7157	-375.848	3504.7	144.221	-8.29	0	2.51785	0	2.825	0.109563	0
2000	1200	99.9983	1	1	278.914	-1.24015e+06	39.7122	-375.766	3504.4	144.22	-8.302	0	2.51807	0	2.83	0.109542	0
2000	1199	99.9984	1	1	278.816	-1.2403e+06	39.7088	-375.685	3504.1	144.218	-8.313	0	2.51829	0	2.835	0.109521	0
2000	1198	99.9984	1	1	278.718	-1.24044e+06	39.7053	-375.603	3503.79	144.217	-8.324	0	2.51851	0	2.84	0.1095	0
2000	1197	99.9985	1	1	278.621	-1.24059e+06	39.7019	-375.522	3503.49	144.215	-8.335	0	2.51873	0	2.845	0.10948	0
2000	1196	99.9985	1	1	278.522	-1.24073e+06	39.6984	-375.441	3503.19	144.214	-8.347	0	2.51896	0	2.85	0.109459	0
2000	1195	99.9986	1	1	278.424	-1.24088e+06	39.695	-375.359	3502.88	144.213	-8.358	0	2.51918	0	2.855	0.109438	0
2000	1194	99.9986	1	1	278.326	-1.24102e+06	39.6915	-375.278	3502.58	144.211	-8.369	0	2.5194	0	2.86	0.109417	0
2000	1193	99.9987	1	1	278.228	-1.24117e+06	39.688	-375.197	3502.27	144.21	-8.381	0	2.51962	0	2.865	0.109396	0
2000	1192	99.9987	1	1	278.13	-1.24131e+06	39.6846	-375.115	3501.96	144.208	-8.392	0	2.51984	0	2.87	0.109376	0
2000	1191	99.9988	1	1	278.031	-1.24146e+06	39.6811	-375.034	3501.66	144.207	-8.404	0	2.52006	0	2.875	0.109355	0
2000	1190	99.9989	1	1	277.933	-1.2416e+06	39.6777	-374.953	3501.35	144.205	-8.415	0	2.52028	0	2.88	0.109335	0
2000	1189	99.9989	1	1	277.834	-1.24175e+06	39.6742	-374.872	3501.04	144.204	-8.426	0	2.5205	0	2.885	0.109314	0
2000	1188	99.999	1	1	277.736	-1.24189e+06	39.6708	-374.791	3500.73	144.203	-8.438	0	2.52072	0	2.889	0.109293	0
2000	1187	99.999	1	1	277.637	-1.24204e+06	39.6673	-374.71	3500.42	144.201	-8.449	0	2.52094	0	2.894	0.109273	0
2000	1186	99.9991	1	1	277.539	-1.24218e+06	39.6639	-374.629	3500.11	144.2	-8.461	0	2.52116	0	2.899	0.109252	0
2000	1185	99.9991	1	1	277.44	-1.24233e+06	39.6604	-374.547	3499.8	144.198	-8.472	0	2.52138	0	2.904	0.109232	0
2000	1184	99.9992	1	1	277.341	-1.24247e+06	39.657	-374.466	3499.49	144.197	-8.484	0	2.52161	0	2.909	0.109212	0
2000	1183	99.9992	1	1	277.242	-1.24262e+06	39.6535	-374.386	3499.17	144.195	-8.495	0	2.52183	0	2.914	0.109191	0
2000	1182	99.9993	1	1	277.143	-1.24276e+06	39.6501	-374.305	3498.86	144.194	-8.507	0	2.52205	0	2.919	0.109171	0
2000	1181	99.9994	1	1	277.044	-1.24291e+06	39.6466	-374.224	3498.55	144.192	-8.518	0	2.52227	0	2.924	0.109151	0
2000	1180	99.9994	1	1	276.945	-1.24305e+06	39.6432	-374.143	3498.23	144.191	-8.53	0	2.52249	0	2.929	0.10913	0
2000	1179	99.9995	1	1	276.846	-1.2432e+06	39.6397	-374.062	3497.92	144.189	-8.542	0	2.52271	0	2.934	0.10911	0
2000	1178	99.9995	1	1	276.747	-1.24334e+06	39.6363	-373.981	3497.6	144.188	-8.553	0	2.52293	0	2.94	0.10909	0
2000	1177	99.9996	1	1	276.647	-1.24349e+06	39.6328	-373.9	3497.28	144.186	-8.565	0	2.52315	0	2.945	0.10907	0
2000	1176	99.9997	1	1	276.548	-1.24363e+06	39.6294	-373.82	3496.97	144.185	-8.576	0	2.52337	0	2.95	0.10905	0
2000	1175	99.9997	1	1	276.449	-1.24378e+06	39.6259	-373.739	3496.65	144.183	-8.588	0	2.52359	0	2.955	0.109029	0
2000	1174	99.9998	1	1	276.349	-1.24392e+06	39.6225	-373.658	3496.33	144.182	-8.6	0	2.52381	0	2.96	0.109009	0
2000	1173	99.9998	1	1	276.249	-1.24407e+06	39.619	-373.577	3496.01	144.18	-8.611	0	2.52404	0	2.965	0.108989	0
2000	1172	99.9999	1	1	276.15	-1.24421e+06	39.6156	-373.497	3495.69	144.178	-8.623	0	2.52426	0	2.97	0.108969	0
2000	1171	100	1	1	276.05	-1.24436e+06	39.6121	-373.416	3495.37	144.177	-8.635	0	2.52448	0	2.975	0.108949	0
2000	1170	100	1	1	275.95	-1.2445e+06	39.6087	-373.336	3495.05	144.175	-8.646	0	2.5247	0	2.98	0.108929	0
2000	1169	100	1	1	275.851	-1.24465e+06	39.6053	-373.255	3494.73	144.174	-8.658	0	2.52492	0	2.985	0.10891	0
2000	1168	100	1	1	275.751	-1.24479e+06	39.6018	-373.174	3494.4	144.172	-8.67	0	2.52514	0	2.99	0.10889	0
2000	1167	100	1	1	275.651	-1.24494e+06	39.5984	-373.094	3494.08	144.171	-8.682	0	2.52536	0	2.995	0.10887	0
2000	1166	100	1	1	275.551	-1.24508e+06	39.5949	-373.013	3493.76	144.169	-8.694	0	2.52558	0	3	0.10885	0
2000	1165	100	1	1	275.451	-1.24523e+06	39.5915	-372.933	3493.43	144.167	-8.705	0	2.5258	0	3.006	0.10883	0
2000	1164	100	1	1	275.35	-1.24537e+06	39.5881	-372.853	3493.11	144.166	-8.717	0	2.52603	0	3.011	0.108811	0
2000	1163	100	1	1	275.25	-1.24552e+06	39.5846	-372.772	3492.78	144.164	-8.729	0	2.52625	0	3.016	0.108791	0
2000	1162	100.001	1	1	275.15	-1.24566e+06	39.5812	-372.692	3492.46	144.163	-8.741	0	2.52647	0	3.021	0.108772	0
2000	1161	100.001	1	1	275.049	-1.24581e+06	39.5777	-372.612	3492.13	144.161	-8.753	0	2.52669	0	3.026	0.108752	0
2000	1160	100.001	1	1	274.949	-1.24595e+06	39.5743	-372.531	3491.8	144.159	-8.765	0	2.52691	0	3.031	0.108732	0
2000	1159	100.001	1	1	274.848	-1.2461e+06	39.5709	-372.451	3491.47	144.158	-8.777	0	2.52713	0	3.036	0.108713	0
2000	1158	100.001	1	1	274.748	-1.24624e+06	39.5674	-372.371	3491.14	144.156	-8.789	0	2.52735	0	3.042	0.108693	0
2000	1157	100.001	1	1	274.647	-1.24639e+06	39.564	-372.291	3490.81	144.154	-8.8	0	2.52757	0	3.047	0.108674	0
2000	1156	100.001	1	1	274.547	-1.24654e+06	39.5605	-372.211	3490.48	144.153	-8.812	0	2.52779	0	3.052	0.108655	0
2000	1155	100.001	1	1	274.446	-1.24668e+06	39.5571	-372.13	3490.15	144.151	-8.824	0	2.52801	0	3.057	0.108635	0
2000	1154	100.001	1	1	274.345	-1.24683e+06	39.5537	-372.05	3489.82	144.149	-8.836	0	2.52824	0	3.062	0.108616	0
2000	1153	100.001	0.993433	0.994342	274.091	-1.24718e+06	39.5291	-370.914	3481.37	143.96	-8.848	0	2.52749	2.93605	3.071	0.109587	0
2000	1152	99.3458	0.991268	0.992173	272.218	-1.23899e+06	39.2808	-369.081	3463.06	142.918	-8.86	0	2.52681	2.82164	3.075	0.111089	0
2000	1151	98.4801	0.990896	0.991979	269.819	-1.22783e+06	38.945	-367.141	3442.84	141.598	-8.872	0	2.52594	2.87007	3.08	0.112629	0
2000	1150	97.5873	0.99062	0.991781	267.367	-1.2164e+06	38.604	-365.198	3421.77	140.247	-8.885	0	2.52494	2.88488	3.086	0.114218	0
2000	1149	96.6746	0.990724	0.991873	264.873	-1.20476e+06	38.2584	-363.279	3400.68	138.881	-8.897	0	2.52396	2.8839	3.092	0.11581	0
2000	1148	95.7806	0.990815	0.991954	262.43	-1.19337e+06	37.9197	-361.392	3380	137.543	-8.909	0	2.52298	2.88332	3.098	0.117406	0
2000	1147	94.9036	0.990904	0.992033	260.033	-1.18219e+06	37.5874	-359.538	3359.71	136.231	-8.921	0	2.52201	2.88274	3.104	0.119005	0
2000	1146	94.0431	0.990992	0.992111	257.68	-1.17122e+06	37.2612	-357.713	3339.8	134.943	-8.933	0	2.52104	2.88216	3.11	0.120608	0
2000	1145	93.1987	0.991077	0.992188	255.371	-1.16046e+06	36.941	-355.918	3320.26	133.68	-8.945	0	2.52008	2.88157	3.116	0.122214	0
2000	1144	92.3698	0.991161	0.992263	253.104	-1.1499e+06	36.6267	-354.152	3301.07	132.441	-8.957	0	2.51912	2.88099	3.121	0.123823	0
2000	1143	91.5561	0.991244	0.992336	250.879	-1.13953e+06	36.3181	-352.414	3282.23	131.224	-8.969	0	2.51818	2.8804	3.127	0.125436	0
2000	1142	90.7572	0.991324	0.992408	248.693	-1.12936e+06	36.015	-350.704	3263.72	130.03	-8.982	0	2.51723	2.8798	3.133	0.127052	0
2000	1141	89.9725	0.991404	0.992479	246.547	-1.11936e+06	35.7172	-349.02	3245.55	128.858	-8.994	0	2.51629	2.87921	3.138	0.128671	0
2000	1140	89.2018	0.991481	0.992548	244.438	-1.10955e+06	35.4247	-347.361	3227.69	127.707	-9.006	0	2.51536	2.87861	3.144	0.130293	0
2000	1139	88.4447	0.991558	0.992616	242.366	-1.09991e+06	35.1373	-345.728	3210.15	126.576	-9.018	0	2.51444	2.87801	3.149	0.131919	0
2000	1138	87.7008	0.991633	0.992683	240.33	-1.09044e+06	34.8548	-344.12	3192.9	125.465	-9.031	0	2.51352	2.87741	3.155	0.133547	0
2000	1137	86.9697	0.991706	0.992749	238.328	-1.08113e+06	34.5771	-342.535	3175.96	124.374	-9.043	0	2.5126	2.87681	3.16	0.135178	0
2000	1136	86.2512	0.991778	0.992813	236.361	-1.07198e+06	34.3041	-340.974	3159.29	123.302	-9.055	0	2.51169	2.87621	3.165	0.136812	0
2000	1135	85.5448	0.991849	0.992876	234.427	-1.06299e+06	34.0357	-339.435	3142.91	122.248	-9.067	0	2.51079	2.8756	3.171	0.138449	0
2000	1134	84.8503	0.991919	0.992938	232.525	-1.05416e+06	33.7717	-337.918	3126.8	121.212	-9.08	0	2.50989	2.87499	3.176	0.140089	0
2000	1133	84.1674	0.991987	0.992999	230.654	-1.04547e+06	33.5121	-336.423	3110.95	120.194	-9.092	0	2.509	2.87438	3.181	0.141731	0
2000	1132	83.4958	0.992054	0.993058	228.814	-1.03692e+06	33.2567	-334.948	3095.36	119.193	-9.105	0	2.50811	2.87377	3.186	0.143377	0
2000	1131	82.8351	0.99212	0.993117	227.004	-1.02852e+06	33.0054	-333.494	3080.02	118.208	-9.117	0	2.50723	2.87316	3.192	0.145024	0
2000	1130	82.1852	0.992185	0.993174	225.223	-1.02025e+06	32.7581	-332.06	3064.93	117.24	-9.129	0	2.50635	2.87255	3.197	0.146675	0
2000	1129	81.5457	0.992249	0.993231	223.47	-1.01212e+06	32.5148	-330.646	3050.07	116.288	-9.142	0	2.50548	2.87193	3.202	0.148328	0
2000	1128	80.9164	0.992311	0.993287	221.745	-1.00412e+06	32.2752	-329.251	3035.45	115.351	-9.154	0	2.50461	2.87132	3.207	0.149984	0
2000	1127	80.297	0.992373	0.993341	220.047	-996241	32.0394	-327.874	3021.06	114.429	-9.167	0	2.50375	2.8707	3.212	0.151642	0
2000	1126	79.6874	0.992433	0.993395	218.376	-988490	31.8073	-326.515	3006.89	113.521	-9.179	0	2.5029	2.87008	3.217	0.153303	0
2000	1125	79.0872	0.992493	0.993448	216.73	-980861	31.5786	-325.174	2992.93	112.628	-9.192	0	2.50205	2.86946	3.221	0.154966	0
2000	1124	78.4963	0.992551	0.993499	215.109	-973350	31.3535	-323.85	2979.19	111.749	-9.204	0	2.5012	2.86884	3.226	0.156631	0
2000	1123	77.9144	0.992608	0.99355	213.513	-965954	31.1317	-322.543	2965.65	110.884	-9.217	0	2.50036	2.86822	3.231	0.158299	0
2000	1122	77.3412	0.992665	0.9936	211.941	-958671	30.9132	-321.252	2952.31	110.032	-9.229	0	2.49953	2.8676	3.236	0.159969	0
2000	1121	76.7767	0.99272	0.993649	210.392	-951499	30.698	-319.978	2939.17	109.193	-9.242	0	2.4987	2.86698	3.24	0.161642	0
2000	1120	76.2206	0.992775	0.993698	208.865	-944433	30.4859	-318.719	2926.22	108.367	-9.254	0	2.49787	2.86636	3.245	0.163317	0
2000	1119	75.6727	0.992828	0.993745	207.362	-937473	30.2769	-317.476	2913.46	107.553	-9.267	0	2.49705	2.86574	3.25	0.164994	0
2000	1118	75.1329	0.992881	0.993792	205.88	-930616	30.0709	-316.248	2900.89	106.751	-9.28	0	2.49623	2.86512	3.254	0.166673	0
2000	1117	74.6008	0.992933	0.993838	204.419	-923859	29.8678	-315.034	2888.49	105.961	-9.292	0	2.49543	2.86449	3.259	0.168355	0
2000	1116	74.0765	0.992984	0.993883	202.979	-917200	29.6676	-313.835	2876.26	105.183	-9.305	0	2.49462	2.86387	3.263	0.170038	0
2000	1115	73.5596	0.993035	0.993928	201.56	-910637	29.4703	-312.65	2864.21	104.416	-9.318	0	2.49382	2.86325	3.268	0.171724	0
2000	1114	73.05	0.993084	0.993972	200.16	-904167	29.2756	-311.478	2852.33	103.66	-9.33	0	2.49302	2.86262	3.272	0.173412	0
2000	1113	72.5477	0.993133	0.994015	198.78	-897789	29.0837	-310.32	2840.61	102.915	-9.343	0	2.49223	2.862	3.277	0.175102	0
2000	1112	72.0523	0.993181	0.994057	197.419	-891501	28.8944	-309.175	2829.05	102.181	-9.356	0	2.49145	2.86138	3.281	0.176794	0
2000	1111	71.5638	0.993228	0.994099	196.077	-885301	28.7076	-308.044	2817.64	101.456	-9.368	0	2.49066	2.86076	3.285	0.178488	0
2000	1110	71.082	0.993274	0.99414	194.753	-879186	28.5234	-306.924	2806.39	100.742	-9.381	0	2.48989	2.86013	3.289	0.180184	0
2000	1109	70.6067	0.99332	0.99418	193.447	-873155	28.3417	-305.817	2795.29	100.038	-9.394	0	2.48911	2.85951	3.294	0.181882	0
2000	1108	70.1379	0.993365	0.99422	192.158	-867207	28.1623	-304.723	2784.33	99.3441	-9.407	0	2.48835	2.85889	3.298	0.183582	0
2000	1107	69.6754	0.993409	0.994259	190.886	-861338	27.9853	-303.64	2773.52	98.6593	-9.42	0	2.48758	2.85827	3.302	0.185284	0
2000	1106	69.219	0.993453	0.994298	189.631	-855549	27.8106	-302.568	2762.85	97.9837	-9.432	0	2.48683	2.85765	3.306	0.186988	0
2000	1105	68.7686	0.993496	0.994335	188.393	-849836	27.6382	-301.508	2752.32	97.3173	-9.445	0	2.48607	2.85703	3.31	0.188693	0
2000	1104	68.3242	0.993538	0.994373	187.17	-844200	27.468	-300.459	2741.92	96.6598	-9.458	0	2.48532	2.85641	3.314	0.190401	0
2000	1103	67.8855	0.99358	0.99441	185.964	-838636	27.3	-299.421	2731.65	96.011	-9.471	0	2.48458	2.85579	3.318	0.19211	0
2000	1102	67.4525	0.993621	0.994446	184.773	-833146	27.1341	-298.394	2721.51	95.3708	-9.484	0	2.48384	2.85517	3.322	0.193822	0
2000	1101	67.0251	0.993661	0.994481	183.596	-827726	26.9703	-297.377	2711.5	94.7389	-9.497	0	2.4831	2.85456	3.326	0.195535	0
2000	1100	66.6031	0.993701	0.994516	182.435	-822376	26.8085	-296.371	2701.61	94.1153	-9.51	0	2.48237	2.85394	3.33	0.19725	0
2000	1099	66.1864	0.99374	0.994551	181.288	-817093	26.6487	-295.374	2691.85	93.4997	-9.523	0	2.48164	2.85333	3.334	0.198966	0
2000	1098	65.7749	0.993779	0.994585	180.156	-811878	26.4909	-294.388	2682.2	92.8919	-9.536	0	2.48091	2.85271	3.337	0.200685	0
2000	1097	65.3686	0.993817	0.994619	179.037	-806728	26.335	-293.411	2672.67	92.2919	-9.549	0	2.4802	2.8521	3.341	0.202405	0
2000	1096	64.9672	0.993854	0.994652	177.932	-801642	26.181	-292.444	2663.25	91.6995	-9.562	0	2.47948	2.85149	3.345	0.204127	0
2000	1095	64.5708	0.993891	0.994684	176.841	-796619	26.0288	-291.486	2653.95	91.1145	-9.575	0	2.47877	2.85088	3.348	0.20585	0
2000	1094	64.1793	0.993928	0.994716	175.762	-791657	25.8784	-290.537	2644.75	90.5368	-9.588	0	2.47806	2.85027	3.352	0.207576	0
2000	1093	63.7924	0.993964	0.994748	174.697	-786756	25.7299	-289.597	2635.67	89.9662	-9.601	0	2.47736	2.84967	3.356	0.209302	0
2000	1092	63.4102	0.993999	0.994779	173.644	-781914	25.583	-288.666	2626.68	89.4026	-9.614	0	2.47666	2.84906	3.359	0.211031	0
2000	1091	63.0325	0.994034	0.99481	172.603	-777131	25.4379	-287.743	2617.81	88.8459	-9.627	0	2.47596	2.84846	3.363	0.212761	0
2000	1090	62.6594	0.994068	0.99484	171.575	-772404	25.2945	-286.829	2609.03	88.2959	-9.64	0	2.47527	2.84786	3.366	0.214493	0
2000	1089	62.2906	0.994102	0.99487	170.559	-767734	25.1527	-285.924	2600.35	87.7525	-9.654	0	2.47459	2.84726	3.37	0.216226	0
2000	1088	61.9261	0.994136	0.9949	169.554	-763118	25.0125	-285.027	2591.77	87.2156	-9.667	0	2.4739	2.84666	3.373	0.217961	0
2000	1087	61.5658	0.994169	0.994929	168.561	-758556	24.8739	-284.137	2583.29	86.6851	-9.68	0	2.47323	2.84606	3.376	0.219698	0
2000	1086	61.2096	0.994201	0.994957	167.579	-754047	24.7368	-283.256	2574.9	86.1608	-9.693	0	2.47255	2.84547	3.38	0.221436	0
2000	1085	60.8576	0.994233	0.994986	166.608	-749590	24.6013	-282.382	2566.61	85.6427	-9.706	0	2.47188	2.84488	3.383	0.223176	0
2000	1084	60.5095	0.994265	0.995013	165.649	-745184	24.4673	-281.516	2558.4	85.1305	-9.72	0	2.47121	2.84429	3.386	0.224917	0
2000	1083	60.1653	0.994296	0.995041	164.7	-740829	24.3348	-280.657	2550.28	84.6243	-9.733	0	2.47055	2.8437	3.39	0.22666	0
2000	1082	59.825	0.994327	0.995068	163.761	-736522	24.2037	-279.806	2542.26	84.1239	-9.746	0	2.46989	2.84311	3.393	0.228404	0
2000	1081	59.4885	0.994357	0.995095	162.833	-732263	24.0741	-278.962	2534.31	83.6292	-9.76	0	2.46923	2.84253	3.396	0.23015	0
2000	1080	59.1557	0.994387	0.995121	161.915	-728052	23.9458	-278.125	2526.45	83.14	-9.773	0	2.46858	2.84195	3.399	0.231897	0
2000	1079	58.8266	0.994417	0.995147	161.006	-723888	23.8189	-277.295	2518.68	82.6564	-9.786	0	2.46793	2.84137	3.402	0.233645	0
2000	1078	58.501	0.994446	0.995172	160.108	-719769	23.6934	-276.472	2510.98	82.1782	-9.8	0	2.46729	2.84079	3.405	0.235395	0
2000	1077	58.1789	0.994474	0.995198	159.219	-715696	23.5691	-275.656	2503.37	81.7052	-9.813	0	2.46664	2.84022	3.408	0.237147	0
2000	1076	57.8604	0.994503	0.995223	158.34	-711666	23.4462	-274.846	2495.83	81.2375	-9.827	0	2.46601	2.83965	3.411	0.2389	0
2000	1075	57.5452	0.994531	0.995247	157.47	-707680	23.3246	-274.043	2488.37	80.7749	-9.84	0	2.46537	2.83908	3.414	0.240654	0
2000	1074	57.2333	0.994558	0.995272	156.609	-703737	23.2042	-273.247	2480.99	80.3174	-9.853	0	2.46474	2.83852	3.417	0.24241	0
2000	1073	56.9248	0.994586	0.995295	155.757	-699835	23.0851	-272.456	2473.68	79.8648	-9.867	0	2.46411	2.83795	3.42	0.244167	0
2000	1072	56.6195	0.994613	0.995319	154.914	-695975	22.9671	-271.672	2466.44	79.417	-9.88	0	2.46349	2.83739	3.423	0.245925	0
2000	1071	56.3173	0.994639	0.995342	154.08	-692155	22.8504	-270.894	2459.28	78.974	-9.894	0	2.46287	2.83684	3.426	0.247685	0
2000	1070	56.0183	0.994665	0.995365	153.254	-688375	22.7348	-270.122	2452.19	78.5358	-9.907	0	2.46225	2.83628	3.428	0.249446	0
2000	1069	55.7224	0.994691	0.995388	152.436	-684635	22.6204	-269.356	2445.16	78.1021	-9.921	0	2.46164	2.83573	3.431	0.251208	0
2000	1068	55.4294	0.994717	0.995411	151.627	-680932	22.5072	-268.596	2438.21	77.673	-9.935	0	2.46103	2.83519	3.434	0.252972	0
2000	1067	55.1395	0.994742	0.995433	150.826	-677268	22.395	-267.841	2431.32	77.2484	-9.948	0	2.46042	2.83464	3.437	0.254737	0
2000	1066	54.8524	0.994767	0.995455	150.033	-673641	22.284	-267.092	2424.5	76.8281	-9.962	0	2.45982	2.8341	3.439	0.256503	0
2000	1065	54.5683	0.994791	0.995476	149.248	-670051	22.174	-266.349	2417.74	76.4122	-9.975	0	2.45922	2.83356	3.442	0.258271	0
2000	1064	54.287	0.994816	0.995498	148.47	-666497	22.0651	-265.611	2411.05	76.0005	-9.989	0	2.45862	2.83303	3.444	0.26004	0
2000	1063	54.0084	0.994839	0.995519	147.7	-662978	21.9573	-264.878	2404.42	75.593	-10.003	0	2.45802	2.8325	3.447	0.26181	0
2000	1062	53.7326	0.994863	0.995539	146.938	-659494	21.8505	-264.151	2397.85	75.1897	-10.016	0	2.45743	2.83197	3.45	0.263581	0
2000	1061	53.4595	0.994886	0.99556	146.183	-656045	21.7447	-263.429	2391.34	74.7904	-10.03	0	2.45685	2.83144	3.452	0.265353	0
2000	1060	53.189	0.99491	0.99558	145.435	-652629	21.6399	-262.712	2384.89	74.395	-10.044	0	2.45626	2.83092	3.454	0.267127	0
2000	1059	52.9212	0.994932	0.9956	144.694	-649247	21.5361	-262	2378.5	74.0036	-10.058	0	2.45568	2.83041	3.457	0.268902	0
2000	1058	52.6559	0.994955	0.99562	143.961	-645898	21.4332	-261.294	2372.17	73.616	-10.071	0	2.4551	2.82989	3.459	0.270678	0
2000	1057	52.3931	0.994977	0.99564	143.234	-642580	21.3313	-260.592	2365.9	73.2323	-10.085	0	2.45452	2.82938	3.462	0.272455	0
2000	1056	52.1329	0.994999	0.995659	142.514	-639295	21.2304	-259.895	2359.68	72.8523	-10.099	0	2.45395	2.82888	3.464	0.274233	0
2000	1055	51.8751	0.995021	0.995678	141.801	-636041	21.1303	-259.202	2353.52	72.4759	-10.113	0	2.45338	2.82838	3.466	0.276013	0
2000	1054	51.6197	0.995042	0.995697	141.094	-632817	21.0312	-258.515	2347.41	72.1032	-10.127	0	2.45282	2.82788	3.469	0.277794	0
2000	1053	51.3667	0.995063	0.995715	140.394	-629624	20.933	-257.832	2341.35	71.7341	-10.141	0	2.45225	2.82738	3.471	0.279575	0
2000	1052	51.116	0.995084	0.995734	139.701	-626461	20.8357	-257.153	2335.35	71.3685	-10.155	0	2.45169	2.82689	3.473	0.281358	0
2000	1051	50.8676	0.995105	0.995752	139.014	-623327	20.7392	-256.48	2329.4	71.0063	-10.169	0	2.45113	2.82641	3.475	0.283142	0
2000	1050	50.6215	0.995125	0.99577	138.332	-620223	20.6436	-255.81	2323.5	70.6476	-10.183	0	2.45058	2.82593	3.477	0.284927	0
2000	1049	50.3777	0.995145	0.995788	137.658	-617146	20.5488	-255.145	2317.65	70.2922	-10.196	0	2.45003	2.82545	3.479	0.286713	0
2000	1048	50.136	0.995165	0.995805	136.989	-614098	20.4549	-254.484	2311.85	69.9401	-10.21	0	2.44948	2.82498	3.481	0.2885	0
2000	1047	49.8965	0.995185	0.995822	136.326	-611078	20.3618	-253.828	2306.1	69.5913	-10.224	0	2.44893	2.82451	3.484	0.290288	0
2000	1046	49.6592	0.995204	0.99584	135.669	-608085	20.2694	-253.175	2300.4	69.2456	-10.239	0	2.44839	2.82404	3.486	0.292077	0
2000	1045	49.4239	0.995223	0.995856	135.017	-605119	20.1779	-252.527	2294.74	68.9032	-10.253	0	2.44785	2.82359	3.488	0.293867	0
2000	1044	49.1908	0.995242	0.995873	134.372	-602179	20.0872	-251.883	2289.13	68.5639	-10.267	0	2.44731	2.82313	3.49	0.295658	0
2000	1043	48.9597	0.995261	0.99589	133.732	-599265	19.9973	-251.243	2283.57	68.2276	-10.281	0	2.44677	2.82268	3.491	0.29745	0
2000	1042	48.7306	0.99528	0.995906	133.097	-596377	19.9081	-250.607	2278.05	67.8944	-10.295	0	2.44624	2.82224	3.493	0.299243	0
2000	1041	48.5035	0.995298	0.995922	132.468	-593515	19.8196	-249.975	2272.58	67.5641	-10.309	0	2.44571	2.82179	3.495	0.301037	0
2000	1040	48.2783	0.995316	0.995938	131.845	-590678	19.7319	-249.347	2267.15	67.2368	-10.323	0	2.44518	2.82136	3.497	0.302832	0
2000	1039	48.0551	0.995334	0.995954	131.226	-587865	19.645	-248.722	2261.77	66.9124	-10.337	0	2.44466	2.82093	3.499	0.304628	0
2000	1038	47.8338	0.995352	0.995969	130.613	-585077	19.5587	-248.101	2256.42	66.5908	-10.352	0	2.44414	2.8205	3.501	0.306425	0
2000	1037	47.6144	0.995369	0.995985	130.005	-582312	19.4732	-247.484	2251.12	66.2721	-10.366	0	2.44361	2.82008	3.502	0.308223	0
2000	1036	47.3969	0.995387	0.996	129.403	-579571	19.3884	-246.871	2245.86	65.9561	-10.38	0	2.4431	2.81966	3.504	0.310021	0
2000	1035	47.1811	0.995404	0.996015	128.805	-576854	19.3042	-246.261	2240.64	65.6429	-10.394	0	2.44258	2.81925	3.506	0.311821	0
2000	1034	46.9672	0.99542	0.99603	128.212	-574160	19.2208	-245.655	2235.47	65.3324	-10.409	0	2.44207	2.81885	3.508	0.313621	0
2000	1033	46.755	0.995437	0.996045	127.624	-571488	19.138	-245.052	2230.33	65.0245	-10.423	0	2.44156	2.81845	3.509	0.315422	0
2000	1032	46.5446	0.995454	0.99606	127.041	-568838	19.0558	-244.453	2225.23	64.7193	-10.437	0	2.44105	2.81805	3.511	0.317224	0
2000	1031	46.3359	0.99547	0.996074	126.462	-566211	18.9744	-243.857	2220.17	64.4166	-10.452	0	2.44055	2.81766	3.512	0.319027	0
2000	1030	46.129	0.995486	0.996088	125.889	-563606	18.8936	-243.265	2215.14	64.1165	-10.466	0	2.44004	2.81727	3.514	0.32083	0
2000	1029	45.9237	0.995502	0.996102	125.32	-561022	18.8134	-242.676	2210.16	63.8189	-10.48	0	2.43954	2.8169	3.515	0.322635	0
2000	1028	45.7201	0.995518	0.996116	124.755	-558459	18.7338	-242.09	2205.21	63.5239	-10.495	0	2.43904	2.81652	3.517	0.32444	0
2000	1027	45.5181	0.995534	0.99613	124.195	-555917	18.6549	-241.508	2200.3	63.2312	-10.509	0	2.43855	2.81615	3.518	0.326246	0
2000	1026	45.3177	0.995532	0.996134	123.639	-553396	18.5765	-240.928	2195.4	62.9407	-10.524	0	2.43804	2.81884	3.52	0.328057	0
2000	1025	45.1188	0.995511	0.996126	123.087	-550894	18.4987	-240.35	2190.5	62.652	-10.538	0	2.43751	2.82607	3.522	0.329877	0
2000	1024	44.9202	0.995514	0.996133	122.537	-548402	18.4212	-239.776	2185.63	62.3644	-10.553	0	2.43698	2.82873	3.523	0.331698	0
2000	1023	44.7226	0.995527	0.996145	121.99	-545927	18.3442	-239.204	2180.82	62.0798	-10.567	0	2.43646	2.82866	3.525	0.333519	0
2000	1022	44.5266	0.99554	0.996157	121.447	-543472	18.2678	-238.635	2176.01	61.7963	-10.582	0	2.43593	2.82859	3.526	0.335343	0
2000	1021	44.332	0.995553	0.996169	120.908	-541035	18.1919	-238.07	2171.22	61.515	-10.596	0	2.43541	2.82854	3.528	0.337167	0
2000	1020	44.1388	0.995566	0.996181	120.373	-538617	18.1165	-237.507	2166.47	61.2358	-10.611	0	2.43488	2.82851	3.529	0.338992	0
2000	1019	43.9471	0.995578	0.996192	119.842	-536218	18.0417	-236.947	2161.75	60.9588	-10.626	0	2.43436	2.82849	3.531	0.340819	0
2000	1018	43.7568	0.995591	0.996203	119.315	-533837	17.9675	-236.39	2157.06	60.6839	-10.64	0	2.43384	2.8285	3.532	0.342646	0
2000	1017	43.5678	0.995602	0.996215	118.791	-531474	17.8937	-235.836	2152.4	60.411	-10.655	0	2.43331	2.82852	3.533	0.344475	0
2000	1016	43.3802	0.995614	0.996226	118.272	-529128	17.8205	-235.285	2147.77	60.1402	-10.67	0	2.43279	2.82856	3.535	0.346305	0
2000	1015	43.194	0.995626	0.996236	117.756	-526800	17.7478	-234.736	2143.17	59.8714	-10.684	0	2.43227	2.82862	3.536	0.348136	0
2000	1014	43.009	0.995637	0.996247	117.243	-524489	17.6757	-234.19	2138.6	59.6046	-10.699	0	2.43174	2.8287	3.538	0.349968	0
2000	1013	42.8254	0.995648	0.996257	116.735	-522195	17.604	-233.647	2134.05	59.3398	-10.714	0	2.43122	2.82881	3.539	0.351802	0
2000	1012	42.643	0.995659	0.996267	116.23	-519918	17.5328	-233.106	2129.53	59.0768	-10.729	0	2.4307	2.82895	3.54	0.353637	0
2000	1011	42.4619	0.995669	0.996277	115.728	-517657	17.4621	-232.568	2125.03	58.8157	-10.744	0	2.43018	2.82911	3.542	0.355473	0
2000	1010	42.282	0.995679	0.996287	115.23	-515412	17.3918	-232.033	2120.56	58.5565	-10.758	0	2.42965	2.8293	3.543	0.35731	0
2000	1009	42.1033	0.995689	0.996297	114.735	-513183	17.3221	-231.5	2116.12	58.2991	-10.773	0	2.42913	2.82953	3.544	0.359149	0
2000	1008	41.9258	0.995698	0.996306	114.243	-510970	17.2528	-230.969	2111.7	58.0435	-10.788	0	2.4286	2.8298	3.545	0.360989	0
2000	1007	41.7494	0.995707	0.996315	113.755	-508773	17.184	-230.441	2107.3	57.7897	-10.803	0	2.42808	2.83013	3.547	0.36283	0
2000	1006	41.5742	0.995715	0.996323	113.27	-506590	17.1156	-229.916	2102.93	57.5375	-10.818	0	2.42755	2.83054	3.548	0.364673	0
2000	1005	41.4001	0.995723	0.996331	112.788	-504422	17.0476	-229.392	2098.58	57.287	-10.833	0	2.42702	2.83106	3.549	0.366517	0
2000	1004	41.227	0.995729	0.996338	112.308	-502269	16.9801	-228.871	2094.25	57.0381	-10.848	0	2.42648	2.83175	3.55	0.368364	0
2000	1003	41.055	0.995734	0.996344	111.832	-500130	16.9129	-228.353	2089.93	56.7908	-10.863	0	2.42595	2.83274	3.551	0.370213	0
2000	1002	40.8839	0.995734	0.996347	111.358	-498004	16.8462	-227.836	2085.63	56.5448	-10.878	0	2.4254	2.83438	3.553	0.372065	0
2000	1001	40.7136	0.995724	0.996344	110.887	-495891	16.7798	-227.321	2081.32	56.2999	-10.893	0	2.42484	2.83782	3.554	0.373923	0
2000	1000	40.5434	0.995904	0.996462	110.419	-493780	16.7136	-226.813	2077.23	56.0579	-10.908	0	2.42442	2.80847	3.555	0.375737	0
2000	999	40.381	0.995074	0.995931	109.957	-491760	16.6496	-226.281	2072.21	55.8134	-10.923	0	2.42326	2.93582	3.558	0.377782	0
2000	998	40.187	0.994835	0.995786	109.426	-489491	16.5772	-225.736	2066.69	55.5346	-10.938	0	2.42191	2.97129	3.562	0.379888	0
2000	997	39.9843	0.994858	0.995806	108.879	-487162	16.5029	-225.192	2061.12	55.248	-10.953	0	2.42057	2.97041	3.566	0.381993	0
2000	996	39.7836	0.994882	0.995826	108.337	-484855	16.4292	-224.651	2055.61	54.9643	-10.968	0	2.41923	2.96956	3.57	0.384096	0
2000	995	39.5849	0.994905	0.995846	107.8	-482571	16.3562	-224.115	2050.15	54.6834	-10.984	0	2.41789	2.96871	3.574	0.386197	0
2000	994	39.3881	0.994927	0.995866	107.268	-480309	16.2838	-223.582	2044.75	54.4052	-10.999	0	2.41656	2.96788	3.578	0.388297	0
2000	993	39.1931	0.99495	0.995885	106.741	-478069	16.2122	-223.052	2039.39	54.1298	-11.014	0	2.41524	2.96707	3.582	0.390396	0
2000	992	39.0001	0.994972	0.995904	106.219	-475850	16.1412	-222.526	2034.08	53.8571	-11.029	0	2.41392	2.96627	3.586	0.392493	0
2000	991	38.8088	0.994993	0.995923	105.702	-473652	16.0708	-222.003	2028.82	53.587	-11.045	0	2.41261	2.96549	3.59	0.394588	0
2000	990	38.6194	0.995015	0.995942	105.19	-471474	16.0011	-221.484	2023.61	53.3195	-11.06	0	2.41131	2.96472	3.594	0.396682	0
2000	989	38.4317	0.995036	0.99596	104.682	-469317	15.932	-220.968	2018.44	53.0545	-11.075	0	2.41001	2.96396	3.597	0.398774	0
2000	988	38.2458	0.995057	0.995978	104.179	-467179	15.8635	-220.455	2013.32	52.7921	-11.091	0	2.40871	2.96322	3.601	0.400865	0
2000	987	38.0616	0.995078	0.995996	103.681	-465062	15.7956	-219.946	2008.25	52.5321	-11.106	0	2.40742	2.96249	3.605	0.402954	0
2000	986	37.8791	0.995098	0.996014	103.187	-462964	15.7283	-219.44	2003.22	52.2746	-11.121	0	2.40613	2.96178	3.608	0.405042	0
2000	985	37.6983	0.995118	0.996032	102.698	-460885	15.6616	-218.936	1998.23	52.0194	-11.137	0	2.40485	2.96108	3.612	0.407128	0
2000	984	37.5191	0.995138	0.996049	102.213	-458824	15.5954	-218.437	1993.29	51.7667	-11.152	0	2.40358	2.9604	3.616	0.409212	0
2000	983	37.3415	0.995158	0.996066	101.733	-456783	15.5299	-217.94	1988.38	51.5162	-11.168	0	2.40231	2.95973	3.619	0.411294	0
2000	982	37.1655	0.995177	0.996083	101.256	-454760	15.4649	-217.446	1983.52	51.2681	-11.183	0	2.40104	2.95908	3.622	0.413375	0
2000	981	36.9911	0.995196	0.9961	100.784	-452754	15.4004	-216.955	1978.71	51.0222	-11.199	0	2.39978	2.95844	3.626	0.415454	0
2000	980	36.8183	0.995215	0.996117	100.316	-450767	15.3365	-216.467	1973.93	50.7785	-11.214	0	2.39852	2.95782	3.629	0.417532	0
2000	979	36.6469	0.995234	0.996133	99.8522	-448797	15.2732	-215.982	1969.19	50.537	-11.23	0	2.39727	2.95721	3.633	0.419608	0
2000	978	36.4771	0.995253	0.996149	99.3923	-446844	15.2103	-215.5	1964.49	50.2977	-11.246	0	2.39602	2.95661	3.636	0.421682	0
2000	977	36.3087	0.995271	0.996165	98.9363	-444909	15.148	-215.021	1959.82	50.0605	-11.261	0	2.39477	2.95603	3.639	0.423754	0
2000	976	36.1418	0.995289	0.996181	98.4842	-442990	15.0862	-214.545	1955.2	49.8254	-11.277	0	2.39353	2.95547	3.642	0.425825	0
2000	975	35.9763	0.995307	0.996197	98.0359	-441088	15.025	-214.071	1950.61	49.5924	-11.293	0	2.3923	2.95492	3.645	0.427894	0
2000	974	35.8123	0.995324	0.996212	97.5915	-439202	14.9642	-213.601	1946.06	49.3614	-11.308	0	2.39107	2.95439	3.649	0.429961	0
2000	973	35.6496	0.995342	0.996228	97.1507	-437333	14.9039	-213.133	1941.55	49.1324	-11.324	0	2.38984	2.95387	3.652	0.432026	0
2000	972	35.4884	0.995359	0.996243	96.7137	-435479	14.8441	-212.667	1937.07	48.9054	-11.34	0	2.38861	2.95337	3.655	0.43409	0
2000	971	35.3284	0.995376	0.996258	96.2803	-433641	14.7848	-212.205	1932.62	48.6803	-11.355	0	2.38739	2.95288	3.658	0.436152	0
2000	970	35.1699	0.995392	0.996273	95.8504	-431818	14.726	-211.744	1928.21	48.4572	-11.371	0	2.38618	2.95241	3.661	0.438212	0
2000	969	35.0126	0.995409	0.996288	95.4241	-430011	14.6676	-211.287	1923.84	48.2359	-11.387	0	2.38496	2.95196	3.664	0.44027	0
2000	968	34.8566	0.995425	0.996302	95.0013	-428219	14.6097	-210.832	1919.49	48.0166	-11.403	0	2.38375	2.95152	3.667	0.442326	0
2000	967	34.702	0.995442	0.996317	94.582	-426442	14.5523	-210.38	1915.18	47.799	-11.419	0	2.38255	2.9511	3.669	0.444381	0
2000	966	34.5485	0.995458	0.996331	94.166	-424679	14.4953	-209.93	1910.9	47.5833	-11.435	0	2.38134	2.95069	3.672	0.446433	0
2000	965	34.3964	0.995473	0.996345	93.7533	-422931	14.4388	-209.482	1906.66	47.3694	-11.451	0	2.38014	2.9503	3.675	0.448484	0
2000	964	34.2455	0.995489	0.996359	93.344	-421197	14.3827	-209.037	1902.44	47.1572	-11.467	0	2.37895	2.94993	3.678	0.450533	0
2000	963	34.0952	0.994508	0.995629	92.927	-419481	14.3266	-208.552	1897.63	46.9358	-11.483	0	2.37716	2.99031	3.683	0.453106	0
2000	962	33.9114	0.99525	0.99618	92.4449	-417418	14.2607	-208.087	1892.87	46.6852	-11.499	0	2.37574	2.9573	3.686	0.455361	0
2000	961	33.7538	0.995266	0.996196	92.02	-415642	14.2029	-207.634	1888.41	46.4644	-11.515	0	2.37433	2.95705	3.69	0.457615	0
2000	960	33.5975	0.995283	0.996211	91.5987	-413880	14.1455	-207.184	1883.99	46.2455	-11.531	0	2.37292	2.9568	3.694	0.459867	0
2000	959	33.4424	0.995299	0.996226	91.1808	-412133	14.0886	-206.736	1879.61	46.0285	-11.547	0	2.37151	2.95655	3.697	0.462119	0
2000	958	33.2887	0.995315	0.996241	90.7663	-410400	14.0322	-206.29	1875.25	45.8132	-11.563	0	2.3701	2.9563	3.701	0.464368	0
2000	957	33.1362	0.995332	0.996256	90.3552	-408682	13.9762	-205.847	1870.93	45.5998	-11.579	0	2.3687	2.95604	3.705	0.466617	0
2000	956	32.9849	0.995348	0.99627	89.9474	-406977	13.9206	-205.406	1866.64	45.3881	-11.595	0	2.3673	2.95579	3.708	0.468864	0
2000	955	32.8349	0.995364	0.996285	89.5429	-405287	13.8655	-204.968	1862.39	45.1782	-11.611	0	2.36591	2.95553	3.712	0.471109	0
2000	954	32.6861	0.99538	0.9963	89.1417	-403610	13.8108	-204.532	1858.16	44.9701	-11.628	0	2.36452	2.95528	3.715	0.473353	0
2000	953	32.5385	0.995395	0.996314	88.7437	-401947	13.7565	-204.098	1853.97	44.7637	-11.644	0	2.36314	2.95502	3.718	0.475595	0
2000	952	32.3921	0.995411	0.996329	88.3489	-400297	13.7027	-203.666	1849.81	44.5589	-11.66	0	2.36175	2.95476	3.722	0.477835	0
2000	951	32.2469	0.995427	0.996343	87.9572	-398661	13.6492	-203.237	1845.68	44.3559	-11.676	0	2.36037	2.9545	3.725	0.480074	0
2000	950	32.1029	0.995442	0.996357	87.5687	-397038	13.5962	-202.81	1841.57	44.1545	-11.693	0	2.359	2.95424	3.728	0.482311	0
2000	949	31.96	0.995458	0.996372	87.1832	-395427	13.5436	-202.386	1837.5	43.9548	-11.709	0	2.35763	2.95397	3.732	0.484546	0
2000	948	31.8182	0.995473	0.996386	86.8008	-393830	13.4913	-201.963	1833.46	43.7567	-11.725	0	2.35626	2.95371	3.735	0.486779	0
2000	947	31.6776	0.995489	0.9964	86.4215	-392246	13.4395	-201.543	1829.45	43.5603	-11.742	0	2.35489	2.95344	3.738	0.48901	0
2000	946	31.5381	0.995504	0.996414	86.0451	-390674	13.3881	-201.125	1825.47	43.3654	-11.758	0	2.35353	2.95317	3.741	0.491238	0
2000	945	31.3997	0.995519	0.996428	85.6717	-389114	13.337	-200.709	1821.51	43.1721	-11.775	0	2.35218	2.95291	3.744	0.493465	0
2000	944	31.2624	0.995534	0.996441	85.3012	-387567	13.2864	-200.296	1817.59	42.9804	-11.791	0	2.35082	2.95263	3.747	0.49569	0
2000	943	31.1261	0.99555	0.996455	84.9336	-386032	13.2361	-199.884	1813.69	42.7902	-11.808	0	2.34947	2.95236	3.75	0.497912	0
2000	942	30.991	0.995565	0.996469	84.5689	-384510	13.1862	-199.474	1809.82	42.6016	-11.824	0	2.34813	2.95209	3.753	0.500132	0
2000	941	30.8569	0.99558	0.996482	84.207	-382999	13.1367	-199.067	1805.98	42.4144	-11.841	0	2.34679	2.95181	3.756	0.502349	0
2000	940	30.7239	0.995595	0.996496	83.8479	-381500	13.0875	-198.662	1802.16	42.2288	-11.857	0	2.34545	2.95153	3.759	0.504564	0
2000	939	30.5919	0.995609	0.99651	83.4916	-380013	13.0387	-198.258	1798.37	42.0447	-11.874	0	2.34411	2.95125	3.761	0.506776	0
2000	938	30.4609	0.995624	0.996523	83.1381	-378537	12.9903	-197.857	1794.61	41.862	-11.891	0	2.34278	2.95097	3.764	0.508986	0
2000	937	30.331	0.995639	0.996536	82.7873	-377073	12.9422	-197.458	1790.88	41.6808	-11.907	0	2.34146	2.95069	3.767	0.511193	0
2000	936	30.2021	0.995654	0.99655	82.4392	-375620	12.8945	-197.06	1787.17	41.501	-11.924	0	2.34013	2.9504	3.77	0.513398	0
2000	935	30.0742	0.995668	0.996563	82.0938	-374179	12.8472	-196.665	1783.48	41.3226	-11.941	0	2.33881	2.95011	3.772	0.515599	0
2000	934	29.9472	0.995683	0.996576	81.751	-372749	12.8002	-196.271	1779.82	41.1457	-11.958	0	2.3375	2.94982	3.775	0.517798	0
2000	933	29.8213	0.995698	0.996589	81.4109	-371329	12.7535	-195.88	1776.19	40.9701	-11.974	0	2.33619	2.94953	3.778	0.519994	0
2000	932	29.6964	0.995739	0.996632	81.0734	-369922	12.7071	-195.494	1772.6	40.7959	-11.991	0	2.33489	2.95641	3.78	0.522161	0
2000	931	29.5742	0.995697	0.996597	80.7425	-368544	12.6618	-195.108	1769.03	40.6252	-12.008	0	2.33359	2.95327	3.783	0.524347	0
2000	930	29.4512	0.995711	0.99661	80.4104	-367159	12.6162	-194.723	1765.47	40.4539	-12.025	0	2.33229	2.95301	3.785	0.526529	0
2000	929	29.3293	0.995725	0.996622	80.0808	-365784	12.571	-194.339	1761.94	40.2839	-12.042	0	2.33099	2.95275	3.788	0.528708	0
2000	928	29.2082	0.99574	0.996635	79.7536	-364420	12.526	-193.958	1758.43	40.1153	-12.059	0	2.3297	2.95249	3.79	0.530884	0
2000	927	29.0881	0.995754	0.996648	79.429	-363066	12.4814	-193.578	1754.95	39.948	-12.076	0	2.32842	2.95222	3.792	0.533057	0
2000	926	28.9689	0.995768	0.996661	79.1068	-361722	12.4372	-193.201	1751.48	39.782	-12.093	0	2.32714	2.95196	3.795	0.535227	0
2000	925	28.8506	0.995782	0.996673	78.787	-360389	12.3932	-192.825	1748.04	39.6172	-12.11	0	2.32586	2.9517	3.797	0.537393	0
2000	924	28.7332	0.995796	0.996686	78.4696	-359066	12.3496	-192.45	1744.63	39.4538	-12.127	0	2.32458	2.95144	3.799	0.539555	0
2000	923	28.6167	0.99581	0.996698	78.1546	-357752	12.3062	-192.078	1741.23	39.2916	-12.144	0	2.32331	2.95118	3.801	0.541714	0
2000	922	28.5011	0.995824	0.996711	77.8419	-356449	12.2632	-191.707	1737.86	39.1306	-12.161	0	2.32205	2.95092	3.803	0.543869	0
2000	921	28.3864	0.995837	0.996723	77.5316	-355155	12.2205	-191.338	1734.51	38.9709	-12.178	0	2.32078	2.95065	3.806	0.54602	0
2000	920	28.2725	0.995851	0.996735	77.2236	-353871	12.1781	-190.971	1731.19	38.8125	-12.195	0	2.31953	2.95039	3.808	0.548168	0
2000	919	28.1595	0.995865	0.996748	76.9179	-352597	12.136	-190.606	1727.88	38.6552	-12.212	0	2.31827	2.95013	3.81	0.550312	0
2000	918	28.0474	0.995879	0.99676	76.6145	-351332	12.0942	-190.242	1724.6	38.4992	-12.23	0	2.31702	2.94987	3.812	0.552452	0
2000	917	27.9361	0.995893	0.996772	76.3133	-350077	12.0527	-189.88	1721.33	38.3443	-12.247	0	2.31578	2.9496	3.814	0.554587	0
2000	916	27.8256	0.995906	0.996785	76.0143	-348832	12.0115	-189.519	1718.09	38.1907	-12.264	0	2.31454	2.94934	3.816	0.556719	0
2000	915	27.716	0.99592	0.996797	75.7176	-347595	11.9706	-189.16	1714.87	38.0382	-12.281	0	2.3133	2.94907	3.818	0.558847	0
2000	914	27.6072	0.995934	0.996809	75.423	-346368	11.93	-188.803	1711.67	37.8869	-12.299	0	2.31207	2.94881	3.819	0.56097	0
2000	913	27.4992	0.995947	0.996821	75.1306	-345150	11.8897	-188.448	1708.49	37.7367	-12.316	0	2.31084	2.94854	3.821	0.563089	0
2000	912	27.392	0.995961	0.996833	74.8404	-343941	11.8496	-188.094	1705.33	37.5876	-12.333	0	2.30961	2.94828	3.823	0.565204	0
2000	911	27.2856	0.995974	0.996845	74.5523	-342741	11.8099	-187.742	1702.19	37.4398	-12.351	0	2.30839	2.94801	3.825	0.567314	0
2000	910	27.1801	0.995988	0.996857	74.2663	-341549	11.7704	-187.391	1699.07	37.293	-12.368	0	2.30718	2.94774	3.826	0.56942	0
2000	909	27.0753	0.996001	0.996869	73.9824	-340367	11.7312	-187.042	1695.97	37.1473	-12.386	0	2.30597	2.94747	3.828	0.571522	0
2000	908	26.9713	0.996015	0.996881	73.7006	-339193	11.6923	-186.695	1692.89	37.0028	-12.403	0	2.30476	2.9472	3.83	0.573618	0
2000	907	26.868	0.996028	0.996893	73.4209	-338028	11.6536	-186.349	1689.83	36.8593	-12.421	0	2.30356	2.94693	3.831	0.57571	0
2000	906	26.7656	0.996042	0.996905	73.1432	-336872	11.6152	-186.004	1686.79	36.7169	-12.438	0	2.30236	2.94666	3.833	0.577798	0
2000	905	26.6639	0.996055	0.996916	72.8675	-335724	11.5771	-185.661	1683.77	36.5756	-12.456	0	2.30117	2.94638	3.834	0.57988	0
2000	904	26.563	0.996069	0.996928	72.5938	-334585	11.5393	-185.32	1680.77	36.4353	-12.474	0	2.29998	2.94611	3.836	0.581958	0
2000	903	26.4628	0.996082	0.99694	72.3221	-333454	11.5017	-184.98	1677.78	36.2961	-12.491	0	2.29879	2.94584	3.837	0.58403	0
2000	902	26.3633	0.996095	0.996952	72.0524	-332331	11.4644	-184.642	1674.81	36.158	-12.509	0	2.29761	2.94556	3.839	0.586098	0
2000	901	26.2646	0.996109	0.996963	71.7846	-331216	11.4273	-184.305	1671.86	36.0209	-12.527	0	2.29643	2.94529	3.84	0.588161	0
2000	900	26.1667	0.996122	0.996975	71.5188	-330110	11.3905	-183.97	1668.93	35.8848	-12.544	0	2.29526	2.94501	3.841	0.590218	0
Title:	R-magma	-	mresidual	from	MZ-magma	at	T	=	1145	C
Liquid	Composition:
Pressure	Temperature	mass	SiO2	TiO2	Al2O3	Fe2O3	Cr2O3	FeO	MnO	MgO	CaO	Na2O	K2O	H2O
2000	1400	99.992	55.8083	0.16087	16.6342	1.22403	0.00190222	6.83586	0.218292	5.03398	7.88995	4.96311	0.117725	1.11181
2000	1400	99.992	55.8083	0.16087	16.6342	1.22403	0.00190222	6.83586	0.218292	5.03398	7.88995	4.96311	0.117725	1.11181
2000	1399	99.992	55.8083	0.16087	16.6342	1.22417	0.00190222	6.83573	0.218292	5.03398	7.88995	4.96311	0.117725	1.11181
2000	1398	99.992	55.8083	0.16087	16.6342	1.22432	0.00190222	6.8356	0.218292	5.03398	7.88995	4.96311	0.117725	1.11181
2000	1397	99.992	55.8082	0.16087	16.6342	1.22446	0.00190222	6.83547	0.218292	5.03397	7.88994	4.96311	0.117725	1.11181
2000	1396	99.992	55.8082	0.16087	16.6342	1.22461	0.00190222	6.83534	0.218292	5.03397	7.88994	4.9631	0.117725	1.11181
2000	1395	99.992	55.8082	0.16087	16.6342	1.22475	0.00190221	6.8352	0.218292	5.03397	7.88994	4.9631	0.117725	1.11181
2000	1394	99.9921	55.8082	0.16087	16.6342	1.2249	0.00190221	6.83507	0.218292	5.03397	7.88994	4.9631	0.117725	1.11181
2000	1393	99.9921	55.8082	0.16087	16.6342	1.22505	0.00190221	6.83493	0.218292	5.03397	7.88994	4.9631	0.117725	1.11181
2000	1392	99.9921	55.8082	0.16087	16.6342	1.2252	0.00190221	6.83479	0.218292	5.03397	7.88994	4.9631	0.117725	1.11181
2000	1391	99.9921	55.8082	0.16087	16.6342	1.22536	0.00190221	6.83465	0.218292	5.03397	7.88994	4.9631	0.117725	1.11181
2000	1390	99.9921	55.8082	0.16087	16.6342	1.22551	0.00190221	6.83451	0.218292	5.03397	7.88994	4.9631	0.117725	1.11181
2000	1389	99.9921	55.8082	0.16087	16.6342	1.22567	0.00190221	6.83437	0.218291	5.03397	7.88993	4.9631	0.117725	1.11181
2000	1388	99.9921	55.8082	0.16087	16.6342	1.22582	0.00190221	6.83423	0.218291	5.03397	7.88993	4.9631	0.117725	1.11181
2000	1387	99.9922	55.8082	0.16087	16.6342	1.22598	0.00190221	6.83408	0.218291	5.03397	7.88993	4.9631	0.117725	1.11181
2000	1386	99.9922	55.8082	0.16087	16.6342	1.22614	0.00190221	6.83394	0.218291	5.03397	7.88993	4.9631	0.117725	1.1118
2000	1385	99.9922	55.8081	0.160869	16.6342	1.22631	0.00190221	6.83379	0.218291	5.03397	7.88993	4.9631	0.117725	1.1118
2000	1384	99.9922	55.8081	0.160869	16.6342	1.22647	0.00190221	6.83364	0.218291	5.03396	7.88993	4.9631	0.117725	1.1118
2000	1383	99.9922	55.8081	0.160869	16.6342	1.22664	0.00190221	6.83349	0.218291	5.03396	7.88993	4.96309	0.117725	1.1118
2000	1382	99.9922	55.8081	0.160869	16.6342	1.2268	0.00190221	6.83334	0.218291	5.03396	7.88993	4.96309	0.117725	1.1118
2000	1381	99.9923	55.8081	0.160869	16.6342	1.22697	0.00190221	6.83319	0.218291	5.03396	7.88992	4.96309	0.117725	1.1118
2000	1380	99.9923	55.8081	0.160869	16.6342	1.22714	0.00190221	6.83304	0.218291	5.03396	7.88992	4.96309	0.117725	1.1118
2000	1379	99.9923	55.8081	0.160869	16.6342	1.22731	0.00190221	6.83288	0.218291	5.03396	7.88992	4.96309	0.117725	1.1118
2000	1378	99.9923	55.8081	0.160869	16.6342	1.22748	0.00190221	6.83272	0.218291	5.03396	7.88992	4.96309	0.117725	1.1118
2000	1377	99.9923	55.8081	0.160869	16.6342	1.22766	0.00190221	6.83257	0.218291	5.03396	7.88992	4.96309	0.117725	1.1118
2000	1376	99.9923	55.8081	0.160869	16.6341	1.22783	0.00190221	6.83241	0.218291	5.03396	7.88992	4.96309	0.117725	1.1118
2000	1375	99.9924	55.808	0.160869	16.6341	1.22801	0.00190221	6.83224	0.218291	5.03396	7.88992	4.96309	0.117725	1.1118
2000	1374	99.9924	55.808	0.160869	16.6341	1.22819	0.00190221	6.83208	0.218291	5.03396	7.88991	4.96309	0.117725	1.1118
2000	1373	99.9924	55.808	0.160869	16.6341	1.22837	0.00190221	6.83192	0.218291	5.03395	7.88991	4.96309	0.117725	1.1118
2000	1372	99.9924	55.808	0.160869	16.6341	1.22855	0.00190221	6.83175	0.218291	5.03395	7.88991	4.96308	0.117725	1.1118
2000	1371	99.9924	55.808	0.160869	16.6341	1.22874	0.00190221	6.83159	0.218291	5.03395	7.88991	4.96308	0.117725	1.1118
2000	1370	99.9925	55.808	0.160869	16.6341	1.22892	0.00190221	6.83142	0.218291	5.03395	7.88991	4.96308	0.117725	1.1118
2000	1369	99.9925	55.808	0.160869	16.6341	1.22911	0.00190221	6.83125	0.218291	5.03395	7.88991	4.96308	0.117725	1.1118
2000	1368	99.9925	55.808	0.160869	16.6341	1.2293	0.00190221	6.83108	0.218291	5.03395	7.88991	4.96308	0.117725	1.1118
2000	1367	99.9925	55.808	0.160869	16.6341	1.22949	0.00190221	6.83091	0.218291	5.03395	7.8899	4.96308	0.117725	1.1118
2000	1366	99.9925	55.808	0.160869	16.6341	1.22968	0.00190221	6.83073	0.218291	5.03395	7.8899	4.96308	0.117725	1.1118
2000	1365	99.9925	55.8079	0.160869	16.6341	1.22987	0.00190221	6.83056	0.218291	5.03395	7.8899	4.96308	0.117725	1.1118
2000	1364	99.9926	55.8079	0.160869	16.6341	1.23006	0.0019022	6.83038	0.218291	5.03395	7.8899	4.96308	0.117725	1.1118
2000	1363	99.9926	55.8079	0.160869	16.6341	1.23026	0.0019022	6.8302	0.21829	5.03395	7.8899	4.96308	0.117725	1.1118
2000	1362	99.9926	55.8079	0.160869	16.6341	1.23046	0.0019022	6.83002	0.21829	5.03394	7.8899	4.96308	0.117725	1.1118
2000	1361	99.9926	55.8079	0.160869	16.6341	1.23066	0.0019022	6.82984	0.21829	5.03394	7.8899	4.96307	0.117725	1.1118
2000	1360	99.9926	55.8079	0.160869	16.6341	1.23086	0.0019022	6.82966	0.21829	5.03394	7.88989	4.96307	0.117724	1.1118
2000	1359	99.9927	55.8079	0.160869	16.6341	1.23106	0.0019022	6.82948	0.21829	5.03394	7.88989	4.96307	0.117724	1.1118
2000	1358	99.9927	55.8079	0.160869	16.6341	1.23126	0.0019022	6.82929	0.21829	5.03394	7.88989	4.96307	0.117724	1.1118
2000	1357	99.9927	55.8079	0.160869	16.6341	1.23147	0.0019022	6.8291	0.21829	5.03394	7.88989	4.96307	0.117724	1.1118
2000	1356	99.9927	55.8078	0.160869	16.6341	1.23168	0.0019022	6.82892	0.21829	5.03394	7.88989	4.96307	0.117724	1.1118
2000	1355	99.9928	55.8078	0.160869	16.6341	1.23189	0.0019022	6.82873	0.21829	5.03394	7.88989	4.96307	0.117724	1.1118
2000	1354	99.9928	55.8078	0.160869	16.6341	1.2321	0.0019022	6.82853	0.21829	5.03394	7.88988	4.96307	0.117724	1.1118
2000	1353	99.9928	55.8078	0.160869	16.6341	1.23231	0.0019022	6.82834	0.21829	5.03393	7.88988	4.96307	0.117724	1.1118
2000	1352	99.9928	55.8078	0.160868	16.6341	1.23252	0.0019022	6.82815	0.21829	5.03393	7.88988	4.96307	0.117724	1.1118
2000	1351	99.9928	55.8078	0.160868	16.6341	1.23274	0.0019022	6.82795	0.21829	5.03393	7.88988	4.96306	0.117724	1.1118
2000	1350	99.9929	55.8078	0.160868	16.6341	1.23296	0.0019022	6.82776	0.21829	5.03393	7.88988	4.96306	0.117724	1.1118
2000	1349	99.9929	55.8078	0.160868	16.6341	1.23318	0.0019022	6.82756	0.21829	5.03393	7.88988	4.96306	0.117724	1.1118
2000	1348	99.9929	55.8077	0.160868	16.6341	1.2334	0.0019022	6.82736	0.21829	5.03393	7.88987	4.96306	0.117724	1.1118
2000	1347	99.9929	55.8077	0.160868	16.6341	1.23362	0.0019022	6.82715	0.21829	5.03393	7.88987	4.96306	0.117724	1.1118
2000	1346	99.9929	55.8077	0.160868	16.634	1.23384	0.0019022	6.82695	0.21829	5.03393	7.88987	4.96306	0.117724	1.1118
2000	1345	99.993	55.8077	0.160868	16.634	1.23407	0.0019022	6.82675	0.21829	5.03393	7.88987	4.96306	0.117724	1.1118
2000	1344	99.993	55.8077	0.160868	16.634	1.23429	0.0019022	6.82654	0.21829	5.03392	7.88987	4.96306	0.117724	1.1118
2000	1343	99.993	55.8077	0.160868	16.634	1.23452	0.0019022	6.82633	0.21829	5.03392	7.88986	4.96306	0.117724	1.1118
2000	1342	99.993	55.8077	0.160868	16.634	1.23475	0.0019022	6.82612	0.218289	5.03392	7.88986	4.96305	0.117724	1.1118
2000	1341	99.9931	55.8077	0.160868	16.634	1.23499	0.0019022	6.82591	0.218289	5.03392	7.88986	4.96305	0.117724	1.1118
2000	1340	99.9931	55.8076	0.160868	16.634	1.23522	0.00190219	6.8257	0.218289	5.03392	7.88986	4.96305	0.117724	1.11179
2000	1339	99.9931	55.8076	0.160868	16.634	1.23546	0.00190219	6.82549	0.218289	5.03392	7.88986	4.96305	0.117724	1.11179
2000	1338	99.9931	55.8076	0.160868	16.634	1.23569	0.00190219	6.82527	0.218289	5.03392	7.88986	4.96305	0.117724	1.11179
2000	1337	99.9932	55.8076	0.160868	16.634	1.23593	0.00190219	6.82505	0.218289	5.03392	7.88985	4.96305	0.117724	1.11179
2000	1336	99.9932	55.8076	0.160868	16.634	1.23617	0.00190219	6.82484	0.218289	5.03392	7.88985	4.96305	0.117724	1.11179
2000	1335	99.9932	55.8076	0.160868	16.634	1.23642	0.00190219	6.82461	0.218289	5.03391	7.88985	4.96305	0.117724	1.11179
2000	1334	99.9932	55.8076	0.160868	16.634	1.23666	0.00190219	6.82439	0.218289	5.03391	7.88985	4.96304	0.117724	1.11179
2000	1333	99.9933	55.8075	0.160868	16.634	1.23691	0.00190219	6.82417	0.218289	5.03391	7.88985	4.96304	0.117724	1.11179
2000	1332	99.9933	55.8075	0.160868	16.634	1.23715	0.00190219	6.82395	0.218289	5.03391	7.88984	4.96304	0.117724	1.11179
2000	1331	99.9933	55.8075	0.160868	16.634	1.2374	0.00190219	6.82372	0.218289	5.03391	7.88984	4.96304	0.117724	1.11179
2000	1330	99.9933	55.8075	0.160868	16.634	1.23765	0.00190219	6.82349	0.218289	5.03391	7.88984	4.96304	0.117724	1.11179
2000	1329	99.9934	55.8075	0.160868	16.634	1.23791	0.00190219	6.82326	0.218289	5.03391	7.88984	4.96304	0.117724	1.11179
2000	1328	99.9934	55.8075	0.160868	16.634	1.23816	0.00190219	6.82303	0.218289	5.03391	7.88984	4.96304	0.117724	1.11179
2000	1327	99.9934	55.8075	0.160868	16.634	1.23842	0.00190219	6.8228	0.218289	5.0339	7.88983	4.96304	0.117724	1.11179
2000	1326	99.9934	55.8075	0.160867	16.634	1.23868	0.00190219	6.82256	0.218289	5.0339	7.88983	4.96303	0.117724	1.11179
2000	1325	99.9935	55.8074	0.160867	16.634	1.23894	0.00190219	6.82233	0.218289	5.0339	7.88983	4.96303	0.117724	1.11179
2000	1324	99.9935	55.8074	0.160867	16.634	1.2392	0.00190219	6.82209	0.218289	5.0339	7.88983	4.96303	0.117724	1.11179
2000	1323	99.9935	55.8074	0.160867	16.634	1.23946	0.00190219	6.82185	0.218288	5.0339	7.88983	4.96303	0.117723	1.11179
2000	1322	99.9935	55.8074	0.160867	16.634	1.23973	0.00190219	6.82161	0.218288	5.0339	7.88982	4.96303	0.117723	1.11179
2000	1321	99.9936	55.8074	0.160867	16.6339	1.23999	0.00190219	6.82137	0.218288	5.0339	7.88982	4.96303	0.117723	1.11179
2000	1320	99.9936	55.8074	0.160867	16.6339	1.24026	0.00190219	6.82112	0.218288	5.03389	7.88982	4.96303	0.117723	1.11179
2000	1319	99.9936	55.8073	0.160867	16.6339	1.24053	0.00190218	6.82088	0.218288	5.03389	7.88982	4.96303	0.117723	1.11179
2000	1318	99.9936	55.8073	0.160867	16.6339	1.24081	0.00190218	6.82063	0.218288	5.03389	7.88981	4.96302	0.117723	1.11179
2000	1317	99.9937	55.8073	0.160867	16.6339	1.24108	0.00190218	6.82038	0.218288	5.03389	7.88981	4.96302	0.117723	1.11179
2000	1316	99.9937	55.8073	0.160867	16.6339	1.24136	0.00190218	6.82013	0.218288	5.03389	7.88981	4.96302	0.117723	1.11179
2000	1315	99.9937	55.8073	0.160867	16.6339	1.24163	0.00190218	6.81988	0.218288	5.03389	7.88981	4.96302	0.117723	1.11179
2000	1314	99.9938	55.8073	0.160867	16.6339	1.24191	0.00190218	6.81962	0.218288	5.03389	7.88981	4.96302	0.117723	1.11179
2000	1313	99.9938	55.8073	0.160867	16.6339	1.2422	0.00190218	6.81937	0.218288	5.03388	7.8898	4.96302	0.117723	1.11179
2000	1312	99.9938	55.8072	0.160867	16.6339	1.24248	0.00190218	6.81911	0.218288	5.03388	7.8898	4.96302	0.117723	1.11179
2000	1311	99.9938	55.8072	0.160867	16.6339	1.24276	0.00190218	6.81885	0.218288	5.03388	7.8898	4.96301	0.117723	1.11179
2000	1310	99.9939	55.8072	0.160867	16.6339	1.24305	0.00190218	6.81859	0.218288	5.03388	7.8898	4.96301	0.117723	1.11179
2000	1309	99.9939	55.8072	0.160867	16.6339	1.24334	0.00190218	6.81833	0.218288	5.03388	7.88979	4.96301	0.117723	1.11179
2000	1308	99.9939	55.8072	0.160867	16.6339	1.24363	0.00190218	6.81806	0.218288	5.03388	7.88979	4.96301	0.117723	1.11179
2000	1307	99.994	55.8072	0.160867	16.6339	1.24392	0.00190218	6.8178	0.218287	5.03388	7.88979	4.96301	0.117723	1.11179
2000	1306	99.994	55.8071	0.160867	16.6339	1.24422	0.00190218	6.81753	0.218287	5.03387	7.88979	4.96301	0.117723	1.11178
2000	1305	99.994	55.8071	0.160867	16.6339	1.24451	0.00190218	6.81726	0.218287	5.03387	7.88979	4.96301	0.117723	1.11178
2000	1304	99.994	55.8071	0.160867	16.6339	1.24481	0.00190218	6.81699	0.218287	5.03387	7.88978	4.963	0.117723	1.11178
2000	1303	99.9941	55.8071	0.160866	16.6339	1.24511	0.00190218	6.81672	0.218287	5.03387	7.88978	4.963	0.117723	1.11178
2000	1302	99.9941	55.8071	0.160866	16.6339	1.24542	0.00190218	6.81645	0.218287	5.03387	7.88978	4.963	0.117723	1.11178
2000	1301	99.9941	55.8071	0.160866	16.6339	1.24572	0.00190217	6.81617	0.218287	5.03387	7.88978	4.963	0.117723	1.11178
2000	1300	99.9942	55.807	0.160866	16.6338	1.24602	0.00190217	6.81589	0.218287	5.03387	7.88977	4.963	0.117723	1.11178
2000	1299	99.9942	55.807	0.160866	16.6338	1.24633	0.00190217	6.81561	0.218287	5.03386	7.88977	4.963	0.117723	1.11178
2000	1298	99.9942	55.807	0.160866	16.6338	1.24664	0.00190217	6.81533	0.218287	5.03386	7.88977	4.96299	0.117723	1.11178
2000	1297	99.9943	55.807	0.160866	16.6338	1.24695	0.00190217	6.81505	0.218287	5.03386	7.88977	4.96299	0.117723	1.11178
2000	1296	99.9943	55.807	0.160866	16.6338	1.24727	0.00190217	6.81476	0.218287	5.03386	7.88976	4.96299	0.117723	1.11178
2000	1295	99.9943	55.807	0.160866	16.6338	1.24758	0.00190217	6.81448	0.218287	5.03386	7.88976	4.96299	0.117723	1.11178
2000	1294	99.9944	55.8069	0.160866	16.6338	1.2479	0.00190217	6.81419	0.218287	5.03386	7.88976	4.96299	0.117722	1.11178
2000	1293	99.9944	55.8069	0.160866	16.6338	1.24822	0.00190217	6.8139	0.218287	5.03385	7.88976	4.96299	0.117722	1.11178
2000	1292	99.9944	55.8069	0.160866	16.6338	1.24854	0.00190217	6.81361	0.218286	5.03385	7.88975	4.96299	0.117722	1.11178
2000	1291	99.9945	55.8069	0.160866	16.6338	1.24886	0.00190217	6.81331	0.218286	5.03385	7.88975	4.96298	0.117722	1.11178
2000	1290	99.9945	55.8069	0.160866	16.6338	1.24919	0.00190217	6.81302	0.218286	5.03385	7.88975	4.96298	0.117722	1.11178
2000	1289	99.9945	55.8068	0.160866	16.6338	1.24952	0.00190217	6.81272	0.218286	5.03385	7.88975	4.96298	0.117722	1.11178
2000	1288	99.9946	55.8068	0.160866	16.6338	1.24985	0.00190217	6.81242	0.218286	5.03385	7.88974	4.96298	0.117722	1.11178
2000	1287	99.9946	55.8068	0.160866	16.6338	1.25018	0.00190217	6.81212	0.218286	5.03384	7.88974	4.96298	0.117722	1.11178
2000	1286	99.9946	55.8068	0.160866	16.6338	1.25051	0.00190217	6.81182	0.218286	5.03384	7.88974	4.96298	0.117722	1.11178
2000	1285	99.9947	55.8068	0.160866	16.6338	1.25084	0.00190217	6.81152	0.218286	5.03384	7.88974	4.96297	0.117722	1.11178
2000	1284	99.9947	55.8068	0.160865	16.6338	1.25118	0.00190216	6.81121	0.218286	5.03384	7.88973	4.96297	0.117722	1.11178
2000	1283	99.9947	55.8067	0.160865	16.6338	1.25152	0.00190216	6.8109	0.218286	5.03384	7.88973	4.96297	0.117722	1.11178
2000	1282	99.9948	55.8067	0.160865	16.6337	1.25186	0.00190216	6.81059	0.218286	5.03384	7.88973	4.96297	0.117722	1.11178
2000	1281	99.9948	55.8067	0.160865	16.6337	1.2522	0.00190216	6.81028	0.218286	5.03383	7.88972	4.96297	0.117722	1.11178
2000	1280	99.9948	55.8067	0.160865	16.6337	1.25255	0.00190216	6.80997	0.218286	5.03383	7.88972	4.96297	0.117722	1.11178
2000	1279	99.9949	55.8067	0.160865	16.6337	1.2529	0.00190216	6.80965	0.218286	5.03383	7.88972	4.96296	0.117722	1.11178
2000	1278	99.9949	55.8066	0.160865	16.6337	1.25325	0.00190216	6.80934	0.218285	5.03383	7.88972	4.96296	0.117722	1.11177
2000	1277	99.9949	55.8066	0.160865	16.6337	1.2536	0.00190216	6.80902	0.218285	5.03383	7.88971	4.96296	0.117722	1.11177
2000	1276	99.995	55.8066	0.160865	16.6337	1.25395	0.00190216	6.8087	0.218285	5.03383	7.88971	4.96296	0.117722	1.11177
2000	1275	99.995	55.8066	0.160865	16.6337	1.25431	0.00190216	6.80838	0.218285	5.03382	7.88971	4.96296	0.117722	1.11177
2000	1274	99.995	55.8066	0.160865	16.6337	1.25466	0.00190216	6.80805	0.218285	5.03382	7.88971	4.96295	0.117722	1.11177
2000	1273	99.9951	55.8065	0.160865	16.6337	1.25502	0.00190216	6.80772	0.218285	5.03382	7.8897	4.96295	0.117722	1.11177
2000	1272	99.9951	55.8065	0.160865	16.6337	1.25538	0.00190216	6.8074	0.218285	5.03382	7.8897	4.96295	0.117722	1.11177
2000	1271	99.9951	55.8065	0.160865	16.6337	1.25575	0.00190216	6.80707	0.218285	5.03382	7.8897	4.96295	0.117722	1.11177
2000	1270	99.9952	55.8065	0.160865	16.6337	1.25611	0.00190216	6.80673	0.218285	5.03381	7.88969	4.96295	0.117722	1.11177
2000	1269	99.9952	55.8065	0.160865	16.6337	1.25648	0.00190215	6.8064	0.218285	5.03381	7.88969	4.96295	0.117721	1.11177
2000	1268	99.9953	55.8064	0.160865	16.6337	1.25685	0.00190215	6.80607	0.218285	5.03381	7.88969	4.96294	0.117721	1.11177
2000	1267	99.9953	55.8064	0.160865	16.6337	1.25722	0.00190215	6.80573	0.218285	5.03381	7.88968	4.96294	0.117721	1.11177
2000	1266	99.9953	55.8064	0.160864	16.6337	1.2576	0.00190215	6.80539	0.218284	5.03381	7.88968	4.96294	0.117721	1.11177
2000	1265	99.9954	55.8064	0.160864	16.6336	1.25797	0.00190215	6.80505	0.218284	5.03381	7.88968	4.96294	0.117721	1.11177
2000	1264	99.9954	55.8063	0.160864	16.6336	1.25835	0.00190215	6.8047	0.218284	5.0338	7.88968	4.96294	0.117721	1.11177
2000	1263	99.9954	55.8063	0.160864	16.6336	1.25873	0.00190215	6.80436	0.218284	5.0338	7.88967	4.96293	0.117721	1.11177
2000	1262	99.9955	55.8063	0.160864	16.6336	1.25911	0.00190215	6.80401	0.218284	5.0338	7.88967	4.96293	0.117721	1.11177
2000	1261	99.9955	55.8063	0.160864	16.6336	1.2595	0.00190215	6.80366	0.218284	5.0338	7.88967	4.96293	0.117721	1.11177
2000	1260	99.9956	55.8063	0.160864	16.6336	1.25988	0.00190215	6.80331	0.218284	5.0338	7.88966	4.96293	0.117721	1.11177
2000	1259	99.9956	55.8062	0.160864	16.6336	1.26027	0.00190215	6.80296	0.218284	5.03379	7.88966	4.96293	0.117721	1.11177
2000	1258	99.9956	55.8062	0.160864	16.6336	1.26066	0.00190215	6.8026	0.218284	5.03379	7.88966	4.96293	0.117721	1.11177
2000	1257	99.9957	55.8062	0.160864	16.6336	1.26106	0.00190215	6.80225	0.218284	5.03379	7.88965	4.96292	0.117721	1.11177
2000	1256	99.9957	55.8062	0.160864	16.6336	1.26145	0.00190214	6.80189	0.218284	5.03379	7.88965	4.96292	0.117721	1.11177
2000	1255	99.9958	55.8062	0.160864	16.6336	1.26185	0.00190214	6.80153	0.218284	5.03379	7.88965	4.96292	0.117721	1.11177
2000	1254	99.9958	55.8061	0.160864	16.6336	1.26225	0.00190214	6.80116	0.218283	5.03378	7.88965	4.96292	0.117721	1.11176
2000	1253	99.9958	55.8061	0.160864	16.6336	1.26265	0.00190214	6.8008	0.218283	5.03378	7.88964	4.96292	0.117721	1.11176
2000	1252	99.9959	55.8061	0.160864	16.6336	1.26305	0.00190214	6.80043	0.218283	5.03378	7.88964	4.96291	0.117721	1.11176
2000	1251	99.9959	55.8061	0.160863	16.6336	1.26346	0.00190214	6.80006	0.218283	5.03378	7.88964	4.96291	0.117721	1.11176
2000	1250	99.996	55.806	0.160863	16.6335	1.26387	0.00190214	6.79969	0.218283	5.03378	7.88963	4.96291	0.117721	1.11176
2000	1249	99.996	55.806	0.160863	16.6335	1.26428	0.00190214	6.79932	0.218283	5.03377	7.88963	4.96291	0.117721	1.11176
2000	1248	99.996	55.806	0.160863	16.6335	1.26469	0.00190214	6.79895	0.218283	5.03377	7.88963	4.9629	0.11772	1.11176
2000	1247	99.9961	55.806	0.160863	16.6335	1.26511	0.00190214	6.79857	0.218283	5.03377	7.88962	4.9629	0.11772	1.11176
2000	1246	99.9961	55.8059	0.160863	16.6335	1.26553	0.00190214	6.79819	0.218283	5.03377	7.88962	4.9629	0.11772	1.11176
2000	1245	99.9962	55.8059	0.160863	16.6335	1.26595	0.00190214	6.79781	0.218283	5.03377	7.88962	4.9629	0.11772	1.11176
2000	1244	99.9962	55.8059	0.160863	16.6335	1.26637	0.00190214	6.79743	0.218283	5.03376	7.88961	4.9629	0.11772	1.11176
2000	1243	99.9963	55.8059	0.160863	16.6335	1.26679	0.00190213	6.79704	0.218282	5.03376	7.88961	4.96289	0.11772	1.11176
2000	1242	99.9963	55.8059	0.160863	16.6335	1.26722	0.00190213	6.79665	0.218282	5.03376	7.88961	4.96289	0.11772	1.11176
2000	1241	99.9963	55.8058	0.160863	16.6335	1.26765	0.00190213	6.79626	0.218282	5.03376	7.8896	4.96289	0.11772	1.11176
2000	1240	99.9964	55.8058	0.160863	16.6335	1.26808	0.00190213	6.79587	0.218282	5.03375	7.8896	4.96289	0.11772	1.11176
2000	1239	99.9964	55.8058	0.160863	16.6335	1.26851	0.00190213	6.79548	0.218282	5.03375	7.8896	4.96289	0.11772	1.11176
2000	1238	99.9965	55.8058	0.160863	16.6335	1.26895	0.00190213	6.79508	0.218282	5.03375	7.88959	4.96288	0.11772	1.11176
2000	1237	99.9965	55.8057	0.160863	16.6335	1.26938	0.00190213	6.79469	0.218282	5.03375	7.88959	4.96288	0.11772	1.11176
2000	1236	99.9966	55.8057	0.160862	16.6334	1.26982	0.00190213	6.79429	0.218282	5.03375	7.88959	4.96288	0.11772	1.11176
2000	1235	99.9966	55.8057	0.160862	16.6334	1.27027	0.00190213	6.79389	0.218282	5.03374	7.88958	4.96288	0.11772	1.11176
2000	1234	99.9966	55.8057	0.160862	16.6334	1.27071	0.00190213	6.79348	0.218282	5.03374	7.88958	4.96288	0.11772	1.11176
2000	1233	99.9967	55.8056	0.160862	16.6334	1.27116	0.00190213	6.79308	0.218282	5.03374	7.88957	4.96287	0.11772	1.11175
2000	1232	99.9967	55.8056	0.160862	16.6334	1.27161	0.00190213	6.79267	0.218281	5.03374	7.88957	4.96287	0.11772	1.11175
2000	1231	99.9968	55.8056	0.160862	16.6334	1.27206	0.00190212	6.79226	0.218281	5.03373	7.88957	4.96287	0.11772	1.11175
2000	1230	99.9968	55.8056	0.160862	16.6334	1.27251	0.00190212	6.79185	0.218281	5.03373	7.88956	4.96287	0.11772	1.11175
2000	1229	99.9969	55.8055	0.160862	16.6334	1.27297	0.00190212	6.79143	0.218281	5.03373	7.88956	4.96286	0.11772	1.11175
2000	1228	99.9969	55.8055	0.160862	16.6334	1.27343	0.00190212	6.79101	0.218281	5.03373	7.88956	4.96286	0.117719	1.11175
2000	1227	99.997	55.8055	0.160862	16.6334	1.27389	0.00190212	6.7906	0.218281	5.03372	7.88955	4.96286	0.117719	1.11175
2000	1226	99.997	55.8055	0.160862	16.6334	1.27435	0.00190212	6.79018	0.218281	5.03372	7.88955	4.96286	0.117719	1.11175
2000	1225	99.9971	55.8054	0.160862	16.6334	1.27482	0.00190212	6.78975	0.218281	5.03372	7.88955	4.96285	0.117719	1.11175
2000	1224	99.9971	55.8054	0.160862	16.6334	1.27529	0.00190212	6.78933	0.218281	5.03372	7.88954	4.96285	0.117719	1.11175
2000	1223	99.9972	55.8054	0.160862	16.6333	1.27576	0.00190212	6.7889	0.218281	5.03372	7.88954	4.96285	0.117719	1.11175
2000	1222	99.9972	55.8053	0.160861	16.6333	1.27623	0.00190212	6.78847	0.21828	5.03371	7.88953	4.96285	0.117719	1.11175
2000	1221	99.9972	55.8053	0.160861	16.6333	1.27671	0.00190212	6.78804	0.21828	5.03371	7.88953	4.96285	0.117719	1.11175
2000	1220	99.9973	55.8053	0.160861	16.6333	1.27719	0.00190211	6.7876	0.21828	5.03371	7.88953	4.96284	0.117719	1.11175
2000	1219	99.9973	55.8053	0.160861	16.6333	1.27767	0.00190211	6.78717	0.21828	5.03371	7.88952	4.96284	0.117719	1.11175
2000	1218	99.9974	55.8052	0.160861	16.6333	1.27815	0.00190211	6.78673	0.21828	5.0337	7.88952	4.96284	0.117719	1.11175
2000	1217	99.9974	55.8052	0.160861	16.6333	1.27864	0.00190211	6.78629	0.21828	5.0337	7.88952	4.96284	0.117719	1.11175
2000	1216	99.9975	55.8052	0.160861	16.6333	1.27912	0.00190211	6.78585	0.21828	5.0337	7.88951	4.96283	0.117719	1.11175
2000	1215	99.9975	55.8052	0.160861	16.6333	1.27961	0.00190211	6.7854	0.21828	5.0337	7.88951	4.96283	0.117719	1.11175
2000	1214	99.9976	55.8051	0.160861	16.6333	1.28011	0.00190211	6.78495	0.21828	5.03369	7.8895	4.96283	0.117719	1.11174
2000	1213	99.9976	55.8051	0.160861	16.6333	1.2806	0.00190211	6.7845	0.218279	5.03369	7.8895	4.96283	0.117719	1.11174
2000	1212	99.9977	55.8051	0.160861	16.6333	1.2811	0.00190211	6.78405	0.218279	5.03369	7.8895	4.96282	0.117719	1.11174
2000	1211	99.9977	55.805	0.160861	16.6333	1.2816	0.00190211	6.7836	0.218279	5.03369	7.88949	4.96282	0.117719	1.11174
2000	1210	99.9978	55.805	0.16086	16.6332	1.2821	0.00190211	6.78314	0.218279	5.03368	7.88949	4.96282	0.117718	1.11174
2000	1209	99.9978	55.805	0.16086	16.6332	1.28261	0.0019021	6.78268	0.218279	5.03368	7.88948	4.96282	0.117718	1.11174
2000	1208	99.9979	55.805	0.16086	16.6332	1.28312	0.0019021	6.78222	0.218279	5.03368	7.88948	4.96281	0.117718	1.11174
2000	1207	99.9979	55.8049	0.16086	16.6332	1.28363	0.0019021	6.78176	0.218279	5.03368	7.88948	4.96281	0.117718	1.11174
2000	1206	99.998	55.8049	0.16086	16.6332	1.28414	0.0019021	6.78129	0.218279	5.03367	7.88947	4.96281	0.117718	1.11174
2000	1205	99.998	55.8049	0.16086	16.6332	1.28465	0.0019021	6.78082	0.218279	5.03367	7.88947	4.96281	0.117718	1.11174
2000	1204	99.9981	55.8048	0.16086	16.6332	1.28517	0.0019021	6.78035	0.218278	5.03367	7.88946	4.9628	0.117718	1.11174
2000	1203	99.9981	55.8048	0.16086	16.6332	1.28569	0.0019021	6.77988	0.218278	5.03367	7.88946	4.9628	0.117718	1.11174
2000	1202	99.9982	55.8048	0.16086	16.6332	1.28622	0.0019021	6.77941	0.218278	5.03366	7.88946	4.9628	0.117718	1.11174
2000	1201	99.9983	55.8048	0.16086	16.6332	1.28674	0.0019021	6.77893	0.218278	5.03366	7.88945	4.9628	0.117718	1.11174
2000	1200	99.9983	55.8047	0.16086	16.6332	1.28727	0.0019021	6.77845	0.218278	5.03366	7.88945	4.96279	0.117718	1.11174
2000	1199	99.9984	55.8047	0.16086	16.6331	1.2878	0.00190209	6.77797	0.218278	5.03365	7.88944	4.96279	0.117718	1.11174
2000	1198	99.9984	55.8047	0.160859	16.6331	1.28834	0.00190209	6.77748	0.218278	5.03365	7.88944	4.96279	0.117718	1.11174
2000	1197	99.9985	55.8046	0.160859	16.6331	1.28887	0.00190209	6.777	0.218278	5.03365	7.88943	4.96278	0.117718	1.11173
2000	1196	99.9985	55.8046	0.160859	16.6331	1.28941	0.00190209	6.77651	0.218278	5.03365	7.88943	4.96278	0.117718	1.11173
2000	1195	99.9986	55.8046	0.160859	16.6331	1.28995	0.00190209	6.77602	0.218277	5.03364	7.88943	4.96278	0.117718	1.11173
2000	1194	99.9986	55.8045	0.160859	16.6331	1.2905	0.00190209	6.77552	0.218277	5.03364	7.88942	4.96278	0.117717	1.11173
2000	1193	99.9987	55.8045	0.160859	16.6331	1.29104	0.00190209	6.77503	0.218277	5.03364	7.88942	4.96277	0.117717	1.11173
2000	1192	99.9987	55.8045	0.160859	16.6331	1.29159	0.00190209	6.77453	0.218277	5.03364	7.88941	4.96277	0.117717	1.11173
2000	1191	99.9988	55.8045	0.160859	16.6331	1.29214	0.00190209	6.77403	0.218277	5.03363	7.88941	4.96277	0.117717	1.11173
2000	1190	99.9989	55.8044	0.160859	16.6331	1.2927	0.00190209	6.77352	0.218277	5.03363	7.8894	4.96277	0.117717	1.11173
2000	1189	99.9989	55.8044	0.160859	16.6331	1.29326	0.00190208	6.77302	0.218277	5.03363	7.8894	4.96276	0.117717	1.11173
2000	1188	99.999	55.8044	0.160859	16.633	1.29382	0.00190208	6.77251	0.218277	5.03362	7.8894	4.96276	0.117717	1.11173
2000	1187	99.999	55.8043	0.160859	16.633	1.29438	0.00190208	6.772	0.218276	5.03362	7.88939	4.96276	0.117717	1.11173
2000	1186	99.9991	55.8043	0.160858	16.633	1.29494	0.00190208	6.77148	0.218276	5.03362	7.88939	4.96275	0.117717	1.11173
2000	1185	99.9991	55.8043	0.160858	16.633	1.29551	0.00190208	6.77097	0.218276	5.03362	7.88938	4.96275	0.117717	1.11173
2000	1184	99.9992	55.8042	0.160858	16.633	1.29608	0.00190208	6.77045	0.218276	5.03361	7.88938	4.96275	0.117717	1.11173
2000	1183	99.9992	55.8042	0.160858	16.633	1.29666	0.00190208	6.76993	0.218276	5.03361	7.88937	4.96275	0.117717	1.11173
2000	1182	99.9993	55.8042	0.160858	16.633	1.29723	0.00190208	6.76941	0.218276	5.03361	7.88937	4.96274	0.117717	1.11173
2000	1181	99.9994	55.8041	0.160858	16.633	1.29781	0.00190208	6.76888	0.218276	5.0336	7.88936	4.96274	0.117717	1.11172
2000	1180	99.9994	55.8041	0.160858	16.633	1.2984	0.00190207	6.76835	0.218276	5.0336	7.88936	4.96274	0.117717	1.11172
2000	1179	99.9995	55.8041	0.160858	16.633	1.29898	0.00190207	6.76782	0.218275	5.0336	7.88935	4.96273	0.117716	1.11172
2000	1178	99.9995	55.804	0.160858	16.633	1.29957	0.00190207	6.76729	0.218275	5.0336	7.88935	4.96273	0.117716	1.11172
2000	1177	99.9996	55.804	0.160858	16.6329	1.30016	0.00190207	6.76675	0.218275	5.03359	7.88935	4.96273	0.117716	1.11172
2000	1176	99.9997	55.804	0.160857	16.6329	1.30075	0.00190207	6.76621	0.218275	5.03359	7.88934	4.96273	0.117716	1.11172
2000	1175	99.9997	55.8039	0.160857	16.6329	1.30135	0.00190207	6.76567	0.218275	5.03359	7.88934	4.96272	0.117716	1.11172
2000	1174	99.9998	55.8039	0.160857	16.6329	1.30195	0.00190207	6.76513	0.218275	5.03358	7.88933	4.96272	0.117716	1.11172
2000	1173	99.9998	55.8039	0.160857	16.6329	1.30255	0.00190207	6.76458	0.218275	5.03358	7.88933	4.96272	0.117716	1.11172
2000	1172	99.9999	55.8038	0.160857	16.6329	1.30315	0.00190207	6.76403	0.218275	5.03358	7.88932	4.96271	0.117716	1.11172
2000	1171	100	55.8038	0.160857	16.6329	1.30376	0.00190206	6.76348	0.218274	5.03357	7.88932	4.96271	0.117716	1.11172
2000	1170	100	55.8038	0.160857	16.6329	1.30437	0.00190206	6.76293	0.218274	5.03357	7.88931	4.96271	0.117716	1.11172
2000	1169	100	55.8037	0.160857	16.6329	1.30498	0.00190206	6.76237	0.218274	5.03357	7.88931	4.9627	0.117716	1.11172
2000	1168	100	55.8037	0.160857	16.6329	1.3056	0.00190206	6.76181	0.218274	5.03356	7.8893	4.9627	0.117716	1.11172
2000	1167	100	55.8037	0.160857	16.6328	1.30622	0.00190206	6.76125	0.218274	5.03356	7.8893	4.9627	0.117716	1.11172
2000	1166	100	55.8036	0.160856	16.6328	1.30684	0.00190206	6.76068	0.218274	5.03356	7.88929	4.9627	0.117716	1.11171
2000	1165	100	55.8036	0.160856	16.6328	1.30747	0.00190206	6.76012	0.218274	5.03356	7.88929	4.96269	0.117715	1.11171
2000	1164	100	55.8036	0.160856	16.6328	1.30809	0.00190206	6.75955	0.218273	5.03355	7.88928	4.96269	0.117715	1.11171
2000	1163	100	55.8035	0.160856	16.6328	1.30872	0.00190205	6.75897	0.218273	5.03355	7.88928	4.96269	0.117715	1.11171
2000	1162	100.001	55.8035	0.160856	16.6328	1.30936	0.00190205	6.7584	0.218273	5.03355	7.88927	4.96268	0.117715	1.11171
2000	1161	100.001	55.8035	0.160856	16.6328	1.30999	0.00190205	6.75782	0.218273	5.03354	7.88927	4.96268	0.117715	1.11171
2000	1160	100.001	55.8034	0.160856	16.6328	1.31063	0.00190205	6.75724	0.218273	5.03354	7.88926	4.96268	0.117715	1.11171
2000	1159	100.001	55.8034	0.160856	16.6328	1.31128	0.00190205	6.75666	0.218273	5.03354	7.88926	4.96267	0.117715	1.11171
2000	1158	100.001	55.8034	0.160856	16.6327	1.31192	0.00190205	6.75607	0.218273	5.03353	7.88925	4.96267	0.117715	1.11171
2000	1157	100.001	55.8033	0.160856	16.6327	1.31257	0.00190205	6.75548	0.218272	5.03353	7.88925	4.96267	0.117715	1.11171
2000	1156	100.001	55.8033	0.160855	16.6327	1.31322	0.00190205	6.75489	0.218272	5.03353	7.88924	4.96266	0.117715	1.11171
2000	1155	100.001	55.8032	0.160855	16.6327	1.31388	0.00190204	6.7543	0.218272	5.03352	7.88924	4.96266	0.117715	1.11171
2000	1154	100.001	55.8032	0.160855	16.6327	1.31453	0.00190204	6.7537	0.218272	5.03352	7.88923	4.96266	0.117715	1.11171
2000	1153	99.3441	55.8219	0.161862	16.6364	1.31819	0.00191462	6.76088	0.219715	4.96781	7.8899	4.98391	0.118445	1.11906
2000	1152	98.4783	55.8531	0.163238	16.5898	1.32548	0.00193145	6.78973	0.221647	4.9309	7.87009	5.00581	0.119393	1.1289
2000	1151	97.5836	55.888	0.164587	16.5616	1.33166	0.00194916	6.81713	0.223679	4.88886	7.83147	5.03142	0.120402	1.13925
2000	1150	96.6719	55.9257	0.16597	16.5373	1.33715	0.00196754	6.84092	0.225789	4.84531	7.78985	5.05859	0.121452	1.14999
2000	1149	95.7779	55.9631	0.167351	16.513	1.34263	0.00198591	6.86459	0.227896	4.80215	7.74851	5.0856	0.1225	1.16072
2000	1148	94.9009	56.0003	0.168729	16.4885	1.34809	0.00200426	6.8881	0.230002	4.75937	7.70744	5.11245	0.123546	1.17145
2000	1147	94.0404	56.0374	0.170104	16.4638	1.35354	0.0020226	6.91147	0.232107	4.71698	7.66665	5.13913	0.124591	1.18217
2000	1146	93.196	56.0743	0.171477	16.439	1.35898	0.00204093	6.9347	0.23421	4.67495	7.62613	5.16565	0.125633	1.19288
2000	1145	92.3671	56.111	0.172848	16.4141	1.36441	0.00205924	6.95778	0.236312	4.6333	7.58588	5.19201	0.126673	1.20359
2000	1144	91.5534	56.1476	0.174216	16.3891	1.36982	0.00207755	6.98072	0.238412	4.59202	7.5459	5.21821	0.127711	1.21428
2000	1143	90.7544	56.1839	0.175582	16.3639	1.37522	0.00209584	7.00353	0.240511	4.5511	7.50618	5.24425	0.128748	1.22497
2000	1142	89.9698	56.2201	0.176945	16.3386	1.3806	0.00211411	7.0262	0.242608	4.51054	7.46672	5.27014	0.129782	1.23566
2000	1141	89.1991	56.2561	0.178306	16.3131	1.38598	0.00213238	7.04873	0.244705	4.47034	7.42752	5.29587	0.130815	1.24633
2000	1140	88.442	56.292	0.179665	16.2876	1.39135	0.00215063	7.07113	0.246799	4.43049	7.38858	5.32145	0.131845	1.257
2000	1139	87.698	56.3276	0.181022	16.2619	1.3967	0.00216888	7.0934	0.248893	4.39098	7.3499	5.34688	0.132874	1.26767
2000	1138	86.967	56.3631	0.182377	16.2361	1.40204	0.00218711	7.11554	0.250985	4.35183	7.31147	5.37215	0.133901	1.27832
2000	1137	86.2484	56.3985	0.18373	16.2101	1.40738	0.00220533	7.13756	0.253076	4.31301	7.2733	5.39727	0.134926	1.28897
2000	1136	85.542	56.4336	0.18508	16.1841	1.4127	0.00222354	7.15945	0.255166	4.27454	7.23537	5.42224	0.13595	1.29962
2000	1135	84.8476	56.4686	0.186429	16.1579	1.41802	0.00224174	7.18122	0.257255	4.2364	7.19769	5.44707	0.136971	1.31025
2000	1134	84.1646	56.5034	0.187775	16.1316	1.42332	0.00225993	7.20286	0.259342	4.19859	7.16025	5.47175	0.137991	1.32088
2000	1133	83.493	56.538	0.18912	16.1052	1.42862	0.00227811	7.22439	0.261428	4.16111	7.12306	5.49628	0.139009	1.33151
2000	1132	82.8323	56.5725	0.190462	16.0786	1.43391	0.00229628	7.2458	0.263513	4.12395	7.08611	5.52066	0.140025	1.34213
2000	1131	82.1824	56.6068	0.191803	16.052	1.43919	0.00231444	7.26709	0.265597	4.08712	7.0494	5.5449	0.141039	1.35274
2000	1130	81.5429	56.641	0.193142	16.0252	1.44446	0.00233259	7.28827	0.26768	4.0506	7.01292	5.569	0.142052	1.36335
2000	1129	80.9136	56.6749	0.194479	15.9983	1.44973	0.00235073	7.30933	0.269762	4.0144	6.97669	5.59296	0.143063	1.37396
2000	1128	80.2943	56.7088	0.195814	15.9713	1.45499	0.00236887	7.33029	0.271843	3.97851	6.94068	5.61678	0.144072	1.38455
2000	1127	79.6846	56.7424	0.197148	15.9442	1.46024	0.00238699	7.35113	0.273923	3.94293	6.90491	5.64045	0.145079	1.39515
2000	1126	79.0844	56.7759	0.19848	15.917	1.46549	0.00240511	7.37186	0.276002	3.90766	6.86936	5.66399	0.146085	1.40574
2000	1125	78.4935	56.8092	0.19981	15.8897	1.47072	0.00242321	7.39249	0.27808	3.87268	6.83405	5.68739	0.147089	1.41632
2000	1124	77.9115	56.8424	0.201138	15.8623	1.47596	0.00244131	7.41301	0.280157	3.83801	6.79896	5.71065	0.148091	1.4269
2000	1123	77.3384	56.8754	0.202465	15.8348	1.48118	0.0024594	7.43342	0.282233	3.80363	6.76409	5.73378	0.149092	1.43747
2000	1122	76.7739	56.9082	0.203791	15.8072	1.4864	0.00247749	7.45374	0.284308	3.76955	6.72944	5.75677	0.150091	1.44804
2000	1121	76.2178	56.9409	0.205114	15.7794	1.49162	0.00249556	7.47395	0.286382	3.73576	6.69502	5.77963	0.151088	1.45861
2000	1120	75.6699	56.9734	0.206437	15.7516	1.49683	0.00251363	7.49406	0.288456	3.70225	6.66081	5.80236	0.152084	1.46917
2000	1119	75.13	57.0058	0.207758	15.7237	1.50204	0.00253169	7.51407	0.290529	3.66903	6.62683	5.82495	0.153078	1.47972
2000	1118	74.598	57.038	0.209077	15.6956	1.50724	0.00254975	7.53399	0.292601	3.63609	6.59305	5.84742	0.15407	1.49028
2000	1117	74.0736	57.0701	0.210396	15.6675	1.51244	0.0025678	7.5538	0.294672	3.60342	6.55949	5.86975	0.155061	1.50083
2000	1116	73.5568	57.102	0.211712	15.6393	1.51763	0.00258584	7.57353	0.296743	3.57104	6.52614	5.89195	0.15605	1.51137
2000	1115	73.0472	57.1337	0.213028	15.611	1.52282	0.00260388	7.59315	0.298813	3.53892	6.493	5.91403	0.157038	1.52192
2000	1114	72.5448	57.1653	0.214342	15.5825	1.528	0.00262191	7.61269	0.300882	3.50708	6.46007	5.93598	0.158024	1.53246
2000	1113	72.0495	57.1967	0.215655	15.554	1.53319	0.00263994	7.63213	0.302951	3.47551	6.42735	5.95781	0.159008	1.54299
2000	1112	71.5609	57.228	0.216967	15.5254	1.53836	0.00265796	7.65148	0.305019	3.4442	6.39483	5.97951	0.159991	1.55353
2000	1111	71.0791	57.2592	0.218278	15.4967	1.54354	0.00267598	7.67074	0.307086	3.41315	6.36251	6.00108	0.160973	1.56406
2000	1110	70.6039	57.2901	0.219587	15.468	1.54871	0.00269399	7.68992	0.309153	3.38236	6.3304	6.02254	0.161952	1.57458
2000	1109	70.1351	57.321	0.220895	15.4391	1.55388	0.002712	7.709	0.31122	3.35183	6.29848	6.04387	0.162931	1.58511
2000	1108	69.6725	57.3516	0.222203	15.4101	1.55905	0.00273001	7.728	0.313286	3.32155	6.26676	6.06508	0.163908	1.59563
2000	1107	69.2161	57.3822	0.223509	15.3811	1.56422	0.00274801	7.74692	0.315352	3.29153	6.23524	6.08617	0.164883	1.60615
2000	1106	68.7658	57.4126	0.224814	15.352	1.56938	0.002766	7.76574	0.317417	3.26176	6.20392	6.10714	0.165857	1.61667
2000	1105	68.3213	57.4428	0.226119	15.3228	1.57454	0.002784	7.78449	0.319482	3.23223	6.17278	6.12799	0.166829	1.62719
2000	1104	67.8827	57.4729	0.227422	15.2935	1.5797	0.00280199	7.80315	0.321546	3.20295	6.14184	6.14872	0.1678	1.6377
2000	1103	67.4497	57.5028	0.228724	15.2641	1.58486	0.00281997	7.82173	0.323611	3.17391	6.11109	6.16934	0.16877	1.64822
2000	1102	67.0222	57.5326	0.230026	15.2346	1.59002	0.00283796	7.84023	0.325674	3.1451	6.08053	6.18984	0.169738	1.65873
2000	1101	66.6002	57.5623	0.231327	15.2051	1.59518	0.00285594	7.85865	0.327738	3.11654	6.05016	6.21022	0.170705	1.66924
2000	1100	66.1835	57.5918	0.232627	15.1755	1.60033	0.00287392	7.87699	0.329802	3.08821	6.01997	6.23049	0.17167	1.67975
2000	1099	65.7721	57.6212	0.233926	15.1458	1.60549	0.0028919	7.89525	0.331865	3.06012	5.98997	6.25065	0.172634	1.69026
2000	1098	65.3657	57.6504	0.235224	15.116	1.61064	0.00290988	7.91344	0.333928	3.03225	5.96015	6.2707	0.173596	1.70077
2000	1097	64.9644	57.6795	0.236522	15.0861	1.6158	0.00292786	7.93154	0.335991	3.00462	5.93051	6.29063	0.174557	1.71127
2000	1096	64.568	57.7084	0.237819	15.0562	1.62095	0.00294583	7.94958	0.338053	2.97721	5.90105	6.31045	0.175517	1.72178
2000	1095	64.1764	57.7373	0.239115	15.0262	1.62611	0.00296381	7.96753	0.340116	2.95002	5.87177	6.33016	0.176476	1.73228
2000	1094	63.7895	57.7659	0.240411	14.9961	1.63126	0.00298178	7.98541	0.342179	2.92306	5.84267	6.34977	0.177433	1.74279
2000	1093	63.4073	57.7944	0.241706	14.966	1.63641	0.00299975	8.00322	0.344241	2.89631	5.81375	6.36926	0.178388	1.7533
2000	1092	63.0297	57.8228	0.243001	14.9357	1.64157	0.00301773	8.02096	0.346304	2.86978	5.78499	6.38865	0.179343	1.7638
2000	1091	62.6565	57.8511	0.244295	14.9055	1.64672	0.0030357	8.03862	0.348367	2.84347	5.75642	6.40793	0.180296	1.77431
2000	1090	62.2877	57.8792	0.245589	14.8751	1.65188	0.00305368	8.05621	0.350429	2.81737	5.72801	6.4271	0.181247	1.78481
2000	1089	61.9232	57.9072	0.246882	14.8447	1.65704	0.00307165	8.07373	0.352492	2.79148	5.69977	6.44617	0.182198	1.79532
2000	1088	61.5629	57.935	0.248174	14.8142	1.66219	0.00308963	8.09118	0.354555	2.7658	5.67171	6.46514	0.183147	1.80582
2000	1087	61.2068	57.9627	0.249466	14.7836	1.66735	0.0031076	8.10856	0.356618	2.74033	5.64381	6.484	0.184095	1.81633
2000	1086	60.8547	57.9903	0.250758	14.753	1.67251	0.00312558	8.12587	0.358681	2.71506	5.61608	6.50276	0.185041	1.82684
2000	1085	60.5066	58.0178	0.25205	14.7222	1.67768	0.00314356	8.14311	0.360745	2.69	5.58851	6.52141	0.185986	1.83735
2000	1084	60.1625	58.0451	0.253341	14.6915	1.68284	0.00316155	8.16028	0.362808	2.66514	5.56111	6.53997	0.18693	1.84786
2000	1083	59.8222	58.0723	0.254632	14.6607	1.688	0.00317953	8.17738	0.364872	2.64047	5.53386	6.55842	0.187873	1.85837
2000	1082	59.4856	58.0993	0.255922	14.6298	1.69317	0.00319752	8.19442	0.366936	2.61601	5.50679	6.57677	0.188815	1.86888
2000	1081	59.1528	58.1262	0.257213	14.5988	1.69834	0.00321551	8.21139	0.369001	2.59174	5.47987	6.59503	0.189755	1.8794
2000	1080	58.8237	58.153	0.258503	14.5678	1.70351	0.0032335	8.2283	0.371065	2.56766	5.45311	6.61318	0.190694	1.88992
2000	1079	58.4981	58.1797	0.259793	14.5367	1.70868	0.0032515	8.24514	0.373131	2.54378	5.42651	6.63124	0.191632	1.90043
2000	1078	58.1761	58.2062	0.261082	14.5056	1.71386	0.0032695	8.26192	0.375196	2.52008	5.40006	6.6492	0.192569	1.91095
2000	1077	57.8575	58.2326	0.262372	14.4744	1.71903	0.0032875	8.27863	0.377262	2.49658	5.37377	6.66707	0.193504	1.92148
2000	1076	57.5423	58.2589	0.263662	14.4431	1.72421	0.00330551	8.29527	0.379328	2.47326	5.34763	6.68484	0.194438	1.932
2000	1075	57.2304	58.2851	0.264951	14.4118	1.7294	0.00332352	8.31186	0.381395	2.45012	5.32165	6.70251	0.195371	1.94253
2000	1074	56.9219	58.3111	0.26624	14.3804	1.73458	0.00334153	8.32838	0.383463	2.42717	5.29582	6.7201	0.196303	1.95306
2000	1073	56.6166	58.337	0.26753	14.349	1.73977	0.00335955	8.34483	0.385531	2.4044	5.27014	6.73758	0.197234	1.96359
2000	1072	56.3144	58.3628	0.268819	14.3175	1.74496	0.00337758	8.36123	0.387599	2.3818	5.24461	6.75498	0.198164	1.97413
2000	1071	56.0154	58.3885	0.270108	14.286	1.75015	0.00339561	8.37756	0.389668	2.35939	5.21923	6.77228	0.199092	1.98466
2000	1070	55.7195	58.414	0.271397	14.2544	1.75535	0.00341364	8.39383	0.391738	2.33715	5.19399	6.78949	0.20002	1.99521
2000	1069	55.4265	58.4394	0.272687	14.2228	1.76055	0.00343168	8.41004	0.393808	2.31509	5.1689	6.80661	0.200946	2.00575
2000	1068	55.1366	58.4647	0.273976	14.1911	1.76576	0.00344973	8.42619	0.395879	2.2932	5.14396	6.82364	0.201871	2.0163
2000	1067	54.8495	58.4899	0.275266	14.1593	1.77096	0.00346778	8.44228	0.397951	2.27148	5.11916	6.84058	0.202795	2.02685
2000	1066	54.5654	58.5149	0.276556	14.1275	1.77617	0.00348584	8.4583	0.400023	2.24993	5.0945	6.85744	0.203717	2.0374
2000	1065	54.2841	58.5399	0.277846	14.0957	1.78139	0.00350391	8.47427	0.402097	2.22855	5.06998	6.8742	0.204639	2.04796
2000	1064	54.0055	58.5647	0.279136	14.0638	1.7866	0.00352198	8.49018	0.40417	2.20734	5.04561	6.89088	0.20556	2.05853
2000	1063	53.7297	58.5894	0.280426	14.0318	1.79183	0.00354006	8.50602	0.406245	2.18629	5.02137	6.90747	0.206479	2.06909
2000	1062	53.4566	58.614	0.281716	13.9999	1.79705	0.00355815	8.52181	0.408321	2.1654	4.99727	6.92398	0.207398	2.07967
2000	1061	53.1861	58.6384	0.283007	13.9678	1.80228	0.00357624	8.53754	0.410397	2.14468	4.97332	6.9404	0.208315	2.09024
2000	1060	52.9183	58.6628	0.284298	13.9357	1.80751	0.00359434	8.55321	0.412474	2.12411	4.94949	6.95673	0.209231	2.10082
2000	1059	52.653	58.687	0.285589	13.9036	1.81275	0.00361245	8.56882	0.414553	2.10371	4.92581	6.97298	0.210147	2.11141
2000	1058	52.3902	58.7112	0.286881	13.8714	1.81799	0.00363057	8.58438	0.416632	2.08347	4.90225	6.98915	0.211061	2.12199
2000	1057	52.13	58.7352	0.288173	13.8392	1.82324	0.00364869	8.59987	0.418712	2.06338	4.87883	7.00524	0.211974	2.13259
2000	1056	51.8722	58.7591	0.289465	13.8069	1.82849	0.00366683	8.61531	0.420793	2.04344	4.85555	7.02124	0.212886	2.14319
2000	1055	51.6168	58.7828	0.290758	13.7746	1.83374	0.00368497	8.63069	0.422875	2.02366	4.83239	7.03716	0.213797	2.15379
2000	1054	51.3637	58.8065	0.292051	13.7423	1.839	0.00370312	8.64601	0.424958	2.00403	4.80936	7.053	0.214707	2.1644
2000	1053	51.1131	58.8301	0.293345	13.7099	1.84427	0.00372129	8.66127	0.427042	1.98455	4.78647	7.06876	0.215616	2.17502
2000	1052	50.8647	58.8535	0.294639	13.6774	1.84953	0.00373946	8.67647	0.429127	1.96522	4.7637	7.08444	0.216524	2.18564
2000	1051	50.6186	58.8769	0.295933	13.645	1.85481	0.00375764	8.69162	0.431214	1.94604	4.74106	7.10004	0.217431	2.19626
2000	1050	50.3747	58.9001	0.297228	13.6124	1.86008	0.00377583	8.70671	0.433301	1.92701	4.71855	7.11557	0.218336	2.2069
2000	1049	50.1331	58.9232	0.298524	13.5799	1.86537	0.00379403	8.72175	0.43539	1.90812	4.69616	7.13101	0.219241	2.21753
2000	1048	49.8936	58.9462	0.299819	13.5473	1.87065	0.00381224	8.73672	0.43748	1.88938	4.6739	7.14638	0.220145	2.22818
2000	1047	49.6562	58.9691	0.301116	13.5147	1.87595	0.00383046	8.75164	0.439571	1.87077	4.65176	7.16167	0.221048	2.23883
2000	1046	49.421	58.992	0.302413	13.482	1.88124	0.00384869	8.7665	0.441663	1.85231	4.62974	7.17689	0.22195	2.24948
2000	1045	49.1879	59.0146	0.303711	13.4493	1.88654	0.00386694	8.78131	0.443756	1.834	4.60785	7.19203	0.222851	2.26015
2000	1044	48.9567	59.0372	0.305009	13.4165	1.89185	0.00388519	8.79606	0.445851	1.81581	4.58607	7.2071	0.223751	2.27082
2000	1043	48.7277	59.0597	0.306308	13.3838	1.89716	0.00390346	8.81075	0.447947	1.79777	4.56442	7.22209	0.22465	2.28149
2000	1042	48.5006	59.0821	0.307607	13.351	1.90248	0.00392174	8.82538	0.450045	1.77987	4.54289	7.23701	0.225547	2.29218
2000	1041	48.2754	59.1044	0.308907	13.3181	1.9078	0.00394003	8.83996	0.452144	1.7621	4.52147	7.25185	0.226444	2.30287
2000	1040	48.0522	59.1266	0.310208	13.2852	1.91313	0.00395833	8.85448	0.454244	1.74446	4.50017	7.26663	0.22734	2.31356
2000	1039	47.8309	59.1487	0.31151	13.2523	1.91846	0.00397664	8.86894	0.456346	1.72696	4.47899	7.28133	0.228235	2.32427
2000	1038	47.6115	59.1706	0.312812	13.2194	1.9238	0.00399497	8.88335	0.458449	1.70959	4.45792	7.29596	0.22913	2.33498
2000	1037	47.3939	59.1925	0.314115	13.1864	1.92914	0.00401331	8.8977	0.460553	1.69235	4.43697	7.31052	0.230023	2.3457
2000	1036	47.1782	59.2143	0.315418	13.1534	1.93449	0.00403166	8.91199	0.462659	1.67524	4.41613	7.325	0.230915	2.35642
2000	1035	46.9642	59.236	0.316723	13.1203	1.93985	0.00405002	8.92623	0.464767	1.65825	4.39541	7.33942	0.231806	2.36716
2000	1034	46.7521	59.2576	0.318028	13.0873	1.94521	0.0040684	8.9404	0.466876	1.6414	4.3748	7.35377	0.232696	2.3779
2000	1033	46.5417	59.2791	0.319334	13.0542	1.95057	0.0040868	8.95452	0.468987	1.62467	4.35429	7.36806	0.233586	2.38865
2000	1032	46.333	59.3005	0.320641	13.021	1.95594	0.0041052	8.96859	0.471099	1.60807	4.3339	7.38227	0.234474	2.39941
2000	1031	46.126	59.3217	0.321948	12.9879	1.96132	0.00412362	8.98259	0.473213	1.59159	4.31362	7.39642	0.235362	2.41017
2000	1030	45.9207	59.3429	0.323257	12.9547	1.9667	0.00414206	8.99654	0.475328	1.57524	4.29345	7.4105	0.236248	2.42095
2000	1029	45.7171	59.3641	0.324566	12.9215	1.97208	0.00416051	9.01043	0.477445	1.559	4.27339	7.42451	0.237134	2.43173
2000	1028	45.5151	59.3851	0.325876	12.8883	1.97748	0.00417897	9.02426	0.479564	1.54289	4.25343	7.43846	0.238019	2.44252
2000	1027	45.3148	59.406	0.327187	12.855	1.98287	0.00419745	9.03803	0.481685	1.5269	4.23358	7.45235	0.238902	2.45332
2000	1026	45.1152	59.4275	0.328428	12.8217	1.98818	0.00410739	9.05117	0.483815	1.511	4.21382	7.46627	0.239789	2.46417
2000	1025	44.9162	59.45	0.329556	12.7885	1.99334	0.00386826	9.06337	0.485959	1.49518	4.19413	7.48028	0.240681	2.47509
2000	1024	44.7187	59.4725	0.330669	12.7553	1.9985	0.00363199	9.07544	0.488106	1.47947	4.17455	7.49424	0.241572	2.48603
2000	1023	44.5226	59.495	0.33177	12.722	2.00365	0.0033988	9.08739	0.490255	1.46389	4.15507	7.50814	0.242462	2.49697
2000	1022	44.328	59.5175	0.33286	12.6887	2.00879	0.003169	9.09923	0.492407	1.44842	4.13569	7.52199	0.243352	2.50794
2000	1021	44.1348	59.5399	0.333937	12.6554	2.01393	0.00294296	9.11094	0.494562	1.43306	4.11641	7.53579	0.244241	2.51891
2000	1020	43.9431	59.5623	0.335001	12.622	2.01907	0.00272106	9.12254	0.49672	1.41783	4.09723	7.54953	0.245131	2.5299
2000	1019	43.7528	59.5847	0.33605	12.5887	2.0242	0.00250373	9.13401	0.498881	1.4027	4.07815	7.56322	0.246019	2.54091
2000	1018	43.5638	59.6071	0.337084	12.5553	2.02932	0.00229141	9.14535	0.501045	1.38769	4.05917	7.57687	0.246907	2.55193
2000	1017	43.3762	59.6295	0.338102	12.5218	2.03443	0.00208457	9.15656	0.503212	1.3728	4.04029	7.59046	0.247795	2.56297
2000	1016	43.19	59.6518	0.339102	12.4884	2.03954	0.0018837	9.16764	0.505382	1.35802	4.0215	7.604	0.248683	2.57402
2000	1015	43.005	59.6742	0.340084	12.4549	2.04464	0.00168934	9.17858	0.507555	1.34334	4.00281	7.6175	0.24957	2.58509
2000	1014	42.8214	59.6966	0.341045	12.4214	2.04973	0.00150205	9.18937	0.509732	1.32878	3.98421	7.63095	0.250457	2.59618
2000	1013	42.639	59.719	0.341986	12.3879	2.05481	0.00132242	9.20001	0.511913	1.31433	3.96571	7.64435	0.251343	2.60728
2000	1012	42.4578	59.7415	0.342904	12.3544	2.05988	0.00115108	9.21051	0.514096	1.29999	3.9473	7.65771	0.25223	2.6184
2000	1011	42.2779	59.7639	0.343798	12.3208	2.06494	0.000988669	9.22084	0.516284	1.28576	3.92898	7.67103	0.253116	2.62955
2000	1010	42.0993	59.7864	0.344666	12.2872	2.06998	0.000835872	9.23101	0.518475	1.27164	3.91076	7.6843	0.254002	2.64071
2000	1009	41.9217	59.8089	0.345506	12.2536	2.07501	0.000693397	9.24101	0.520671	1.25763	3.89263	7.69754	0.254888	2.65189
2000	1008	41.7454	59.8315	0.346316	12.22	2.08003	0.00056198	9.25082	0.52287	1.24372	3.87459	7.71073	0.255774	2.66309
2000	1007	41.5702	59.8542	0.347092	12.1863	2.08502	0.000442381	9.26044	0.525074	1.22992	3.85664	7.72389	0.256659	2.67432
2000	1006	41.3961	59.877	0.34783	12.1526	2.09	0.000335384	9.26985	0.527283	1.21623	3.83877	7.73702	0.257546	2.68556
2000	1005	41.223	59.8998	0.348526	12.1189	2.09495	0.000241789	9.27903	0.529496	1.20264	3.821	7.75012	0.258432	2.69684
2000	1004	41.051	59.9228	0.34917	12.0852	2.09987	0.000162408	9.28794	0.531715	1.18916	3.80331	7.76319	0.259319	2.70814
2000	1003	40.8799	59.9461	0.349748	12.0514	2.10475	9.8054e-05	9.29652	0.533941	1.17578	3.7857	7.77625	0.260207	2.71948
2000	1002	40.7095	59.9698	0.350231	12.0176	2.10956	4.95147e-05	9.30462	0.536175	1.16251	3.76818	7.78932	0.261097	2.73086
2000	1001	40.5395	59.9942	0.350536	11.9838	2.11424	1.74911e-05	9.31186	0.538424	1.14935	3.75073	7.80246	0.261991	2.74231
2000	1000	40.3773	60.0117	0.352099	11.95	2.11997	0	9.32508	0.540587	1.13625	3.73352	7.81461	0.262845	2.75332
2000	999	40.1821	60.0649	0.347103	11.9162	2.12026	0	9.30709	0.543213	1.12348	3.71562	7.83151	0.263903	2.7667
2000	998	39.9794	60.1277	0.340402	11.8824	2.11904	0	9.28054	0.545967	1.11091	3.69764	7.84962	0.265016	2.78073
2000	997	39.7787	60.1903	0.333795	11.8486	2.11781	0	9.254	0.548721	1.09846	3.67977	7.86765	0.266126	2.79475
2000	996	39.58	60.2527	0.32728	11.8148	2.11657	0	9.22747	0.551476	1.08614	3.66203	7.88558	0.267235	2.80879
2000	995	39.3832	60.3149	0.320855	11.7809	2.11531	0	9.20095	0.554232	1.07396	3.6444	7.90341	0.268341	2.82282
2000	994	39.1883	60.3769	0.314521	11.7469	2.11405	0	9.17443	0.556989	1.06189	3.62689	7.92116	0.269446	2.83686
2000	993	38.9952	60.4386	0.308275	11.7129	2.11277	0	9.14791	0.559746	1.04996	3.60949	7.93881	0.270548	2.85091
2000	992	38.804	60.5002	0.302118	11.6789	2.11148	0	9.12139	0.562505	1.03814	3.59221	7.95638	0.271649	2.86496
2000	991	38.6145	60.5617	0.296046	11.6449	2.11017	0	9.09487	0.565264	1.02645	3.57504	7.97385	0.272748	2.87901
2000	990	38.4269	60.6229	0.290061	11.6108	2.10885	0	9.06835	0.568025	1.01487	3.55798	7.99124	0.273845	2.89307
2000	989	38.241	60.6839	0.28416	11.5767	2.10752	0	9.04181	0.570786	1.00342	3.54104	8.00854	0.274939	2.90714
2000	988	38.0568	60.7448	0.278343	11.5426	2.10617	0	9.01527	0.573549	0.992085	3.5242	8.02576	0.276032	2.92121
2000	987	37.8743	60.8055	0.272609	11.5084	2.10481	0	8.98872	0.576313	0.980865	3.50747	8.04289	0.277124	2.93528
2000	986	37.6935	60.8661	0.266957	11.4742	2.10343	0	8.96215	0.579077	0.969759	3.49085	8.05994	0.278213	2.94937
2000	985	37.5143	60.9264	0.261386	11.44	2.10203	0	8.93557	0.581843	0.958768	3.47433	8.0769	0.2793	2.96345
2000	984	37.3367	60.9867	0.255895	11.4057	2.10062	0	8.90897	0.584611	0.947888	3.45792	8.09379	0.280386	2.97755
2000	983	37.1607	61.0467	0.250483	11.3714	2.09919	0	8.88236	0.587379	0.93712	3.44161	8.11059	0.28147	2.99165
2000	982	36.9863	61.1066	0.245149	11.3371	2.09774	0	8.85572	0.590149	0.926462	3.42541	8.12731	0.282552	3.00576
2000	981	36.8134	61.1664	0.239893	11.3028	2.09628	0	8.82905	0.59292	0.915912	3.40931	8.14396	0.283632	3.01987
2000	980	36.6421	61.226	0.234714	11.2684	2.0948	0	8.80237	0.595693	0.90547	3.3933	8.16052	0.284711	3.03399
2000	979	36.4723	61.2855	0.229611	11.2341	2.09329	0	8.77565	0.598467	0.895134	3.3774	8.17701	0.285788	3.04812
2000	978	36.3039	61.3448	0.224583	11.1997	2.09177	0	8.7489	0.601242	0.884903	3.3616	8.19343	0.286863	3.06225
2000	977	36.137	61.404	0.219629	11.1652	2.09022	0	8.72212	0.604019	0.874777	3.34589	8.20976	0.287936	3.0764
2000	976	35.9715	61.4631	0.214748	11.1308	2.08866	0	8.69531	0.606797	0.864753	3.33028	8.22603	0.289007	3.09055
2000	975	35.8075	61.522	0.209941	11.0963	2.08707	0	8.66846	0.609577	0.854832	3.31476	8.24222	0.290077	3.10471
2000	974	35.6448	61.5809	0.205205	11.0618	2.08547	0	8.64157	0.612359	0.845012	3.29934	8.25834	0.291145	3.11887
2000	973	35.4836	61.6396	0.200541	11.0273	2.08383	0	8.61464	0.615142	0.835291	3.28401	8.27438	0.292212	3.13305
2000	972	35.3236	61.6982	0.195947	10.9928	2.08218	0	8.58766	0.617927	0.825669	3.26878	8.29036	0.293277	3.14723
2000	971	35.1651	61.7566	0.191424	10.9583	2.0805	0	8.56064	0.620713	0.816146	3.25364	8.30626	0.29434	3.16143
2000	970	35.0078	61.815	0.186969	10.9237	2.0788	0	8.53357	0.623502	0.806719	3.23858	8.3221	0.295401	3.17563
2000	969	34.8518	61.8733	0.182583	10.8891	2.07707	0	8.50645	0.626292	0.797389	3.22362	8.33787	0.296461	3.18984
2000	968	34.6972	61.9314	0.178265	10.8546	2.07532	0	8.47928	0.629084	0.788153	3.20875	8.35357	0.297519	3.20406
2000	967	34.5438	61.9895	0.174014	10.82	2.07354	0	8.45205	0.631877	0.779012	3.19396	8.3692	0.298576	3.21829
2000	966	34.3916	62.0475	0.16983	10.7853	2.07173	0	8.42477	0.634673	0.769965	3.17926	8.38477	0.29963	3.23253
2000	965	34.2407	62.1054	0.165712	10.7507	2.06989	0	8.39742	0.637471	0.761009	3.16464	8.40027	0.300684	3.24678
2000	964	34.091	62.1632	0.161659	10.7161	2.06803	0	8.37002	0.64027	0.752146	3.15012	8.41571	0.301735	3.26103
2000	963	33.9079	62.2444	0.159274	10.68	2.06279	0	8.3229	0.638426	0.735091	3.1398	8.43561	0.303041	3.27864
2000	962	33.7503	62.3136	0.156098	10.6428	2.05929	0	8.28641	0.638227	0.725148	3.12891	8.4514	0.304155	3.29395
2000	961	33.594	62.3826	0.152974	10.6057	2.05576	0	8.2499	0.638015	0.715306	3.11809	8.46715	0.305269	3.30928
2000	960	33.439	62.4516	0.149902	10.5685	2.05219	0	8.21336	0.63779	0.705564	3.10733	8.48285	0.306382	3.32462
2000	959	33.2852	62.5204	0.146881	10.5313	2.04858	0	8.17679	0.637553	0.695922	3.09663	8.49851	0.307493	3.33997
2000	958	33.1327	62.5891	0.14391	10.4941	2.04494	0	8.14019	0.637303	0.686379	3.086	8.51412	0.308604	3.35535
2000	957	32.9815	62.6577	0.140989	10.457	2.04126	0	8.10357	0.63704	0.676934	3.07543	8.52969	0.309713	3.37073
2000	956	32.8315	62.7261	0.138117	10.4198	2.03755	0	8.06692	0.636765	0.667587	3.06492	8.54522	0.310821	3.38613
2000	955	32.6827	62.7945	0.135294	10.3827	2.03381	0	8.03025	0.636479	0.658337	3.05448	8.5607	0.311929	3.40155
2000	954	32.5351	62.8627	0.132518	10.3456	2.03002	0	7.99357	0.63618	0.649184	3.0441	8.57613	0.313035	3.41698
2000	953	32.3887	62.9308	0.129789	10.3085	2.02621	0	7.95686	0.635869	0.640127	3.03379	8.59152	0.31414	3.43242
2000	952	32.2435	62.9988	0.127108	10.2714	2.02235	0	7.92013	0.635547	0.631165	3.02353	8.60687	0.315243	3.44788
2000	951	32.0994	63.0667	0.124472	10.2343	2.01847	0	7.88339	0.635213	0.622298	3.01334	8.62217	0.316346	3.46336
2000	950	31.9565	63.1344	0.121881	10.1972	2.01454	0	7.84663	0.634868	0.613525	3.00321	8.63742	0.317447	3.47884
2000	949	31.8148	63.2021	0.119335	10.1601	2.01059	0	7.80986	0.634512	0.604846	2.99314	8.65264	0.318547	3.49434
2000	948	31.6742	63.2696	0.116834	10.123	2.00659	0	7.77307	0.634144	0.59626	2.98313	8.6678	0.319646	3.50986
2000	947	31.5347	63.337	0.114376	10.086	2.00257	0	7.73628	0.633766	0.587767	2.97318	8.68293	0.320744	3.52538
2000	946	31.3963	63.4043	0.11196	10.0489	1.99851	0	7.69947	0.633378	0.579365	2.9633	8.69801	0.32184	3.54092
2000	945	31.259	63.4715	0.109588	10.0119	1.99441	0	7.66266	0.632979	0.571055	2.95347	8.71304	0.322935	3.55648
2000	944	31.1227	63.5385	0.107257	9.97487	1.99028	0	7.62584	0.632569	0.562835	2.94371	8.72803	0.324029	3.57204
2000	943	30.9876	63.6055	0.104968	9.93785	1.98612	0	7.58901	0.63215	0.554706	2.934	8.74298	0.325122	3.58762
2000	942	30.8535	63.6723	0.102719	9.90084	1.98192	0	7.55218	0.63172	0.546666	2.92436	8.75788	0.326213	3.60321
2000	941	30.7205	63.739	0.10051	9.86384	1.97769	0	7.51535	0.631281	0.538715	2.91477	8.77273	0.327302	3.61881
2000	940	30.5885	63.8056	0.098341	9.82684	1.97342	0	7.47852	0.630832	0.530853	2.90524	8.78755	0.328391	3.63443
2000	939	30.4576	63.872	0.096211	9.78986	1.96913	0	7.44168	0.630374	0.523078	2.89578	8.80231	0.329478	3.65005
2000	938	30.3276	63.9384	0.0941196	9.75288	1.96479	0	7.40486	0.629906	0.515391	2.88637	8.81704	0.330563	3.66569
2000	937	30.1987	64.0046	0.0920661	9.71592	1.96043	0	7.36803	0.629429	0.50779	2.87702	8.83172	0.331647	3.68134
2000	936	30.0708	64.0707	0.0900501	9.67896	1.95603	0	7.33121	0.628943	0.500276	2.86773	8.84635	0.33273	3.697
2000	935	29.9439	64.1367	0.088071	9.64201	1.9516	0	7.2944	0.628449	0.492846	2.85849	8.86094	0.333811	3.71267
2000	934	29.818	64.2026	0.0861283	9.60507	1.94714	0	7.2576	0.627946	0.485502	2.84932	8.87548	0.33489	3.72835
2000	933	29.693	64.2683	0.0842215	9.56815	1.94264	0	7.2208	0.627434	0.478242	2.8402	8.88998	0.335969	3.74404
2000	932	29.5698	64.3336	0.0822701	9.5325	1.93816	0	7.18463	0.62719	0.470801	2.8295	8.90472	0.337044	3.75964
2000	931	29.4469	64.399	0.0804205	9.49583	1.9336	0	7.14796	0.626711	0.463662	2.8202	8.91918	0.338119	3.77533
2000	930	29.3249	64.4643	0.0786054	9.45917	1.92902	0	7.11131	0.626226	0.456606	2.81095	8.93359	0.339192	3.79103
2000	929	29.2039	64.5295	0.0768243	9.42252	1.9244	0	7.07467	0.625733	0.449631	2.80175	8.94796	0.340264	3.80675
2000	928	29.0838	64.5946	0.0750767	9.38588	1.91975	0	7.03806	0.625233	0.442738	2.79261	8.96229	0.341334	3.82247
2000	927	28.9646	64.6595	0.0733621	9.34926	1.91508	0	7.00146	0.624727	0.435926	2.78352	8.97657	0.342402	3.8382
2000	926	28.8463	64.7243	0.0716801	9.31265	1.91037	0	6.96489	0.624215	0.429193	2.77447	8.99081	0.343469	3.85394
2000	925	28.7289	64.789	0.07003	9.27605	1.90562	0	6.92834	0.623697	0.422539	2.76548	9.00501	0.344534	3.86969
2000	924	28.6124	64.8536	0.0684114	9.23947	1.90085	0	6.89182	0.623173	0.415964	2.75654	9.01915	0.345597	3.88544
2000	923	28.4968	64.918	0.0668239	9.2029	1.89605	0	6.85532	0.622643	0.409467	2.74765	9.03326	0.346659	3.9012
2000	922	28.3821	64.9823	0.0652669	9.16635	1.89122	0	6.81886	0.622108	0.403047	2.7388	9.04732	0.347719	3.91697
2000	921	28.2682	65.0465	0.06374	9.12982	1.88636	0	6.78242	0.621568	0.396704	2.73001	9.06133	0.348777	3.93275
2000	920	28.1552	65.1106	0.0622428	9.0933	1.88147	0	6.74602	0.621024	0.390436	2.72125	9.0753	0.349833	3.94853
2000	919	28.0431	65.1745	0.0607747	9.0568	1.87655	0	6.70965	0.620475	0.384244	2.71255	9.08923	0.350887	3.96432
2000	918	27.9318	65.2383	0.0593352	9.02032	1.87161	0	6.67332	0.619922	0.378127	2.70389	9.10311	0.35194	3.98012
2000	917	27.8213	65.302	0.0579241	8.98386	1.86663	0	6.63703	0.619365	0.372084	2.69527	9.11695	0.35299	3.99592
2000	916	27.7117	65.3655	0.0565407	8.94741	1.86163	0	6.60077	0.618804	0.366114	2.6867	9.13074	0.354039	4.01173
2000	915	27.6029	65.4289	0.0551848	8.91098	1.8566	0	6.56456	0.61824	0.360216	2.67817	9.14449	0.355086	4.02754
2000	914	27.4949	65.4922	0.0538558	8.87458	1.85154	0	6.52839	0.617672	0.354391	2.66969	9.15819	0.35613	4.04336
2000	913	27.3877	65.5553	0.0525533	8.83819	1.84645	0	6.49227	0.617102	0.348638	2.66125	9.17185	0.357173	4.05918
2000	912	27.2814	65.6184	0.0512769	8.80183	1.84134	0	6.45619	0.616528	0.342955	2.65284	9.18546	0.358214	4.07501
2000	911	27.1758	65.6812	0.0500262	8.76548	1.8362	0	6.42017	0.615953	0.337342	2.64448	9.19903	0.359253	4.09084
2000	910	27.071	65.744	0.0488007	8.72916	1.83103	0	6.38419	0.615375	0.331799	2.63616	9.21255	0.36029	4.10667
2000	909	26.967	65.8066	0.0476002	8.69286	1.82584	0	6.34826	0.614795	0.326325	2.62788	9.22603	0.361324	4.12251
2000	908	26.8638	65.869	0.0464241	8.65658	1.82062	0	6.31239	0.614213	0.32092	2.61964	9.23946	0.362357	4.13835
2000	907	26.7613	65.9314	0.0452721	8.62033	1.81537	0	6.27657	0.61363	0.315582	2.61144	9.25285	0.363387	4.15419
2000	906	26.6596	65.9936	0.0441437	8.5841	1.81011	0	6.24081	0.613045	0.310311	2.60327	9.26619	0.364416	4.17004
2000	905	26.5587	66.0556	0.0430387	8.54789	1.80481	0	6.20511	0.612459	0.305107	2.59514	9.27949	0.365442	4.18589
2000	904	26.4585	66.1175	0.0419566	8.51171	1.79949	0	6.16947	0.611872	0.299969	2.58705	9.29274	0.366466	4.20174
2000	903	26.3591	66.1793	0.0408971	8.47556	1.79415	0	6.13389	0.611285	0.294896	2.579	9.30595	0.367488	4.21759
2000	902	26.2604	66.2409	0.0398597	8.43943	1.78879	0	6.09837	0.610697	0.289887	2.57098	9.31911	0.368507	4.23344
2000	901	26.1624	66.3024	0.0388442	8.40332	1.7834	0	6.06292	0.610109	0.284943	2.56299	9.33223	0.369524	4.24929
2000	900	26.0652	66.3638	0.0378501	8.36725	1.77798	0	6.02753	0.609521	0.280062	2.55504	9.3453	0.370539	4.26514
Title:	R-magma	-	mresidual	from	MZ-magma	at	T	=	1145	C
liquid_0	thermodynamic	data	and	composition:
Pressure	Temperature	mass	S	H	V	Cp	viscosity	SiO2	TiO2	Al2O3	Fe2O3	Cr2O3	FeO	MnO	MgO	CaO	Na2O	K2O	H2O	Mg#
2000	1400	99.992	297.847	-1.21029e+06	40.4127	149.037	1.97	55.8083	0.16087	16.6342	1.22403	0.00190222	6.83586	0.218292	5.03398	7.88995	4.96311	0.117725	1.11181	56.8
2000	1400	99.992	297.847	-1.21029e+06	40.4127	149.037	1.97	55.8083	0.16087	16.6342	1.22403	0.00190222	6.83586	0.218292	5.03398	7.88995	4.96311	0.117725	1.11181	56.8
2000	1399	99.992	297.758	-1.21044e+06	40.4092	149.037	1.973	55.8083	0.16087	16.6342	1.22417	0.00190222	6.83573	0.218292	5.03398	7.88995	4.96311	0.117725	1.11181	56.8
2000	1398	99.992	297.669	-1.21059e+06	40.4057	149.037	1.977	55.8083	0.16087	16.6342	1.22432	0.00190222	6.8356	0.218292	5.03398	7.88995	4.96311	0.117725	1.11181	56.8
2000	1397	99.992	297.58	-1.21074e+06	40.4021	149.036	1.981	55.8082	0.16087	16.6342	1.22446	0.00190222	6.83547	0.218292	5.03397	7.88994	4.96311	0.117725	1.11181	56.8
2000	1396	99.992	297.491	-1.21089e+06	40.3986	149.036	1.985	55.8082	0.16087	16.6342	1.22461	0.00190222	6.83534	0.218292	5.03397	7.88994	4.9631	0.117725	1.11181	56.8
2000	1395	99.992	297.401	-1.21104e+06	40.3951	149.035	1.989	55.8082	0.16087	16.6342	1.22475	0.00190221	6.8352	0.218292	5.03397	7.88994	4.9631	0.117725	1.11181	56.8
2000	1394	99.9921	297.312	-1.21119e+06	40.3915	149.035	1.992	55.8082	0.16087	16.6342	1.2249	0.00190221	6.83507	0.218292	5.03397	7.88994	4.9631	0.117725	1.11181	56.8
2000	1393	99.9921	297.223	-1.21134e+06	40.388	149.034	1.996	55.8082	0.16087	16.6342	1.22505	0.00190221	6.83493	0.218292	5.03397	7.88994	4.9631	0.117725	1.11181	56.8
2000	1392	99.9921	297.133	-1.21149e+06	40.3844	149.034	2	55.8082	0.16087	16.6342	1.2252	0.00190221	6.83479	0.218292	5.03397	7.88994	4.9631	0.117725	1.11181	56.8
2000	1391	99.9921	297.044	-1.21164e+06	40.3809	149.033	2.004	55.8082	0.16087	16.6342	1.22536	0.00190221	6.83465	0.218292	5.03397	7.88994	4.9631	0.117725	1.11181	56.8
2000	1390	99.9921	296.954	-1.21179e+06	40.3774	149.033	2.008	55.8082	0.16087	16.6342	1.22551	0.00190221	6.83451	0.218292	5.03397	7.88994	4.9631	0.117725	1.11181	56.8
2000	1389	99.9921	296.865	-1.21193e+06	40.3738	149.033	2.012	55.8082	0.16087	16.6342	1.22567	0.00190221	6.83437	0.218291	5.03397	7.88993	4.9631	0.117725	1.11181	56.8
2000	1388	99.9921	296.775	-1.21208e+06	40.3703	149.032	2.015	55.8082	0.16087	16.6342	1.22582	0.00190221	6.83423	0.218291	5.03397	7.88993	4.9631	0.117725	1.11181	56.8
2000	1387	99.9922	296.685	-1.21223e+06	40.3668	149.032	2.019	55.8082	0.16087	16.6342	1.22598	0.00190221	6.83408	0.218291	5.03397	7.88993	4.9631	0.117725	1.11181	56.8
2000	1386	99.9922	296.595	-1.21238e+06	40.3632	149.031	2.023	55.8082	0.16087	16.6342	1.22614	0.00190221	6.83394	0.218291	5.03397	7.88993	4.9631	0.117725	1.1118	56.8
2000	1385	99.9922	296.506	-1.21253e+06	40.3597	149.031	2.027	55.8081	0.160869	16.6342	1.22631	0.00190221	6.83379	0.218291	5.03397	7.88993	4.9631	0.117725	1.1118	56.8
2000	1384	99.9922	296.416	-1.21268e+06	40.3562	149.03	2.031	55.8081	0.160869	16.6342	1.22647	0.00190221	6.83364	0.218291	5.03396	7.88993	4.9631	0.117725	1.1118	56.8
2000	1383	99.9922	296.326	-1.21283e+06	40.3526	149.03	2.035	55.8081	0.160869	16.6342	1.22664	0.00190221	6.83349	0.218291	5.03396	7.88993	4.96309	0.117725	1.1118	56.8
2000	1382	99.9922	296.236	-1.21298e+06	40.3491	149.029	2.039	55.8081	0.160869	16.6342	1.2268	0.00190221	6.83334	0.218291	5.03396	7.88993	4.96309	0.117725	1.1118	56.8
2000	1381	99.9923	296.146	-1.21313e+06	40.3456	149.029	2.042	55.8081	0.160869	16.6342	1.22697	0.00190221	6.83319	0.218291	5.03396	7.88992	4.96309	0.117725	1.1118	56.8
2000	1380	99.9923	296.056	-1.21328e+06	40.342	149.029	2.046	55.8081	0.160869	16.6342	1.22714	0.00190221	6.83304	0.218291	5.03396	7.88992	4.96309	0.117725	1.1118	56.8
2000	1379	99.9923	295.966	-1.21343e+06	40.3385	149.028	2.05	55.8081	0.160869	16.6342	1.22731	0.00190221	6.83288	0.218291	5.03396	7.88992	4.96309	0.117725	1.1118	56.8
2000	1378	99.9923	295.875	-1.21358e+06	40.335	149.028	2.054	55.8081	0.160869	16.6342	1.22748	0.00190221	6.83272	0.218291	5.03396	7.88992	4.96309	0.117725	1.1118	56.8
2000	1377	99.9923	295.785	-1.21373e+06	40.3314	149.027	2.058	55.8081	0.160869	16.6342	1.22766	0.00190221	6.83257	0.218291	5.03396	7.88992	4.96309	0.117725	1.1118	56.8
2000	1376	99.9923	295.695	-1.21388e+06	40.3279	149.027	2.062	55.8081	0.160869	16.6341	1.22783	0.00190221	6.83241	0.218291	5.03396	7.88992	4.96309	0.117725	1.1118	56.8
2000	1375	99.9924	295.605	-1.21402e+06	40.3244	149.026	2.066	55.808	0.160869	16.6341	1.22801	0.00190221	6.83224	0.218291	5.03396	7.88992	4.96309	0.117725	1.1118	56.8
2000	1374	99.9924	295.514	-1.21417e+06	40.3208	149.026	2.07	55.808	0.160869	16.6341	1.22819	0.00190221	6.83208	0.218291	5.03396	7.88991	4.96309	0.117725	1.1118	56.8
2000	1373	99.9924	295.424	-1.21432e+06	40.3173	149.025	2.074	55.808	0.160869	16.6341	1.22837	0.00190221	6.83192	0.218291	5.03395	7.88991	4.96309	0.117725	1.1118	56.8
2000	1372	99.9924	295.333	-1.21447e+06	40.3138	149.025	2.077	55.808	0.160869	16.6341	1.22855	0.00190221	6.83175	0.218291	5.03395	7.88991	4.96308	0.117725	1.1118	56.8
2000	1371	99.9924	295.243	-1.21462e+06	40.3103	149.025	2.081	55.808	0.160869	16.6341	1.22874	0.00190221	6.83159	0.218291	5.03395	7.88991	4.96308	0.117725	1.1118	56.8
2000	1370	99.9925	295.152	-1.21477e+06	40.3067	149.024	2.085	55.808	0.160869	16.6341	1.22892	0.00190221	6.83142	0.218291	5.03395	7.88991	4.96308	0.117725	1.1118	56.8
2000	1369	99.9925	295.061	-1.21492e+06	40.3032	149.024	2.089	55.808	0.160869	16.6341	1.22911	0.00190221	6.83125	0.218291	5.03395	7.88991	4.96308	0.117725	1.1118	56.8
2000	1368	99.9925	294.971	-1.21507e+06	40.2997	149.023	2.093	55.808	0.160869	16.6341	1.2293	0.00190221	6.83108	0.218291	5.03395	7.88991	4.96308	0.117725	1.1118	56.8
2000	1367	99.9925	294.88	-1.21522e+06	40.2961	149.023	2.097	55.808	0.160869	16.6341	1.22949	0.00190221	6.83091	0.218291	5.03395	7.8899	4.96308	0.117725	1.1118	56.8
2000	1366	99.9925	294.789	-1.21537e+06	40.2926	149.022	2.101	55.808	0.160869	16.6341	1.22968	0.00190221	6.83073	0.218291	5.03395	7.8899	4.96308	0.117725	1.1118	56.8
2000	1365	99.9925	294.698	-1.21552e+06	40.2891	149.022	2.105	55.8079	0.160869	16.6341	1.22987	0.00190221	6.83056	0.218291	5.03395	7.8899	4.96308	0.117725	1.1118	56.8
2000	1364	99.9926	294.607	-1.21567e+06	40.2856	149.022	2.109	55.8079	0.160869	16.6341	1.23006	0.0019022	6.83038	0.218291	5.03395	7.8899	4.96308	0.117725	1.1118	56.8
2000	1363	99.9926	294.516	-1.21582e+06	40.282	149.021	2.113	55.8079	0.160869	16.6341	1.23026	0.0019022	6.8302	0.21829	5.03395	7.8899	4.96308	0.117725	1.1118	56.8
2000	1362	99.9926	294.425	-1.21597e+06	40.2785	149.021	2.117	55.8079	0.160869	16.6341	1.23046	0.0019022	6.83002	0.21829	5.03394	7.8899	4.96308	0.117725	1.1118	56.8
2000	1361	99.9926	294.334	-1.21611e+06	40.275	149.02	2.121	55.8079	0.160869	16.6341	1.23066	0.0019022	6.82984	0.21829	5.03394	7.8899	4.96307	0.117725	1.1118	56.8
2000	1360	99.9926	294.243	-1.21626e+06	40.2714	149.02	2.125	55.8079	0.160869	16.6341	1.23086	0.0019022	6.82966	0.21829	5.03394	7.88989	4.96307	0.117724	1.1118	56.8
2000	1359	99.9927	294.151	-1.21641e+06	40.2679	149.02	2.129	55.8079	0.160869	16.6341	1.23106	0.0019022	6.82948	0.21829	5.03394	7.88989	4.96307	0.117724	1.1118	56.8
2000	1358	99.9927	294.06	-1.21656e+06	40.2644	149.019	2.133	55.8079	0.160869	16.6341	1.23126	0.0019022	6.82929	0.21829	5.03394	7.88989	4.96307	0.117724	1.1118	56.8
2000	1357	99.9927	293.969	-1.21671e+06	40.2609	149.019	2.137	55.8079	0.160869	16.6341	1.23147	0.0019022	6.8291	0.21829	5.03394	7.88989	4.96307	0.117724	1.1118	56.8
2000	1356	99.9927	293.877	-1.21686e+06	40.2573	149.018	2.141	55.8078	0.160869	16.6341	1.23168	0.0019022	6.82892	0.21829	5.03394	7.88989	4.96307	0.117724	1.1118	56.8
2000	1355	99.9928	293.786	-1.21701e+06	40.2538	149.018	2.145	55.8078	0.160869	16.6341	1.23189	0.0019022	6.82873	0.21829	5.03394	7.88989	4.96307	0.117724	1.1118	56.8
2000	1354	99.9928	293.695	-1.21716e+06	40.2503	149.017	2.149	55.8078	0.160869	16.6341	1.2321	0.0019022	6.82853	0.21829	5.03394	7.88988	4.96307	0.117724	1.1118	56.8
2000	1353	99.9928	293.603	-1.21731e+06	40.2468	149.017	2.153	55.8078	0.160869	16.6341	1.23231	0.0019022	6.82834	0.21829	5.03393	7.88988	4.96307	0.117724	1.1118	56.8
2000	1352	99.9928	293.511	-1.21746e+06	40.2433	149.017	2.157	55.8078	0.160868	16.6341	1.23252	0.0019022	6.82815	0.21829	5.03393	7.88988	4.96307	0.117724	1.1118	56.8
2000	1351	99.9928	293.42	-1.21761e+06	40.2397	149.016	2.161	55.8078	0.160868	16.6341	1.23274	0.0019022	6.82795	0.21829	5.03393	7.88988	4.96306	0.117724	1.1118	56.8
2000	1350	99.9929	293.328	-1.21776e+06	40.2362	149.016	2.165	55.8078	0.160868	16.6341	1.23296	0.0019022	6.82776	0.21829	5.03393	7.88988	4.96306	0.117724	1.1118	56.8
2000	1349	99.9929	293.236	-1.21791e+06	40.2327	149.015	2.169	55.8078	0.160868	16.6341	1.23318	0.0019022	6.82756	0.21829	5.03393	7.88988	4.96306	0.117724	1.1118	56.8
2000	1348	99.9929	293.144	-1.21806e+06	40.2292	149.015	2.173	55.8077	0.160868	16.6341	1.2334	0.0019022	6.82736	0.21829	5.03393	7.88987	4.96306	0.117724	1.1118	56.8
2000	1347	99.9929	293.052	-1.21821e+06	40.2256	149.015	2.177	55.8077	0.160868	16.6341	1.23362	0.0019022	6.82715	0.21829	5.03393	7.88987	4.96306	0.117724	1.1118	56.8
2000	1346	99.9929	292.96	-1.21835e+06	40.2221	149.014	2.181	55.8077	0.160868	16.634	1.23384	0.0019022	6.82695	0.21829	5.03393	7.88987	4.96306	0.117724	1.1118	56.8
2000	1345	99.993	292.868	-1.2185e+06	40.2186	149.014	2.185	55.8077	0.160868	16.634	1.23407	0.0019022	6.82675	0.21829	5.03393	7.88987	4.96306	0.117724	1.1118	56.8
2000	1344	99.993	292.776	-1.21865e+06	40.2151	149.013	2.189	55.8077	0.160868	16.634	1.23429	0.0019022	6.82654	0.21829	5.03392	7.88987	4.96306	0.117724	1.1118	56.8
2000	1343	99.993	292.684	-1.2188e+06	40.2116	149.013	2.193	55.8077	0.160868	16.634	1.23452	0.0019022	6.82633	0.21829	5.03392	7.88986	4.96306	0.117724	1.1118	56.8
2000	1342	99.993	292.592	-1.21895e+06	40.208	149.013	2.197	55.8077	0.160868	16.634	1.23475	0.0019022	6.82612	0.218289	5.03392	7.88986	4.96305	0.117724	1.1118	56.8
2000	1341	99.9931	292.5	-1.2191e+06	40.2045	149.012	2.201	55.8077	0.160868	16.634	1.23499	0.0019022	6.82591	0.218289	5.03392	7.88986	4.96305	0.117724	1.1118	56.8
2000	1340	99.9931	292.408	-1.21925e+06	40.201	149.012	2.205	55.8076	0.160868	16.634	1.23522	0.00190219	6.8257	0.218289	5.03392	7.88986	4.96305	0.117724	1.11179	56.8
2000	1339	99.9931	292.315	-1.2194e+06	40.1975	149.011	2.209	55.8076	0.160868	16.634	1.23546	0.00190219	6.82549	0.218289	5.03392	7.88986	4.96305	0.117724	1.11179	56.8
2000	1338	99.9931	292.223	-1.21955e+06	40.194	149.011	2.214	55.8076	0.160868	16.634	1.23569	0.00190219	6.82527	0.218289	5.03392	7.88986	4.96305	0.117724	1.11179	56.8
2000	1337	99.9932	292.13	-1.2197e+06	40.1904	149.011	2.218	55.8076	0.160868	16.634	1.23593	0.00190219	6.82505	0.218289	5.03392	7.88985	4.96305	0.117724	1.11179	56.8
2000	1336	99.9932	292.038	-1.21985e+06	40.1869	149.01	2.222	55.8076	0.160868	16.634	1.23617	0.00190219	6.82484	0.218289	5.03392	7.88985	4.96305	0.117724	1.11179	56.8
2000	1335	99.9932	291.945	-1.22e+06	40.1834	149.01	2.226	55.8076	0.160868	16.634	1.23642	0.00190219	6.82461	0.218289	5.03391	7.88985	4.96305	0.117724	1.11179	56.8
2000	1334	99.9932	291.853	-1.22015e+06	40.1799	149.009	2.23	55.8076	0.160868	16.634	1.23666	0.00190219	6.82439	0.218289	5.03391	7.88985	4.96304	0.117724	1.11179	56.8
2000	1333	99.9933	291.76	-1.2203e+06	40.1764	149.009	2.234	55.8075	0.160868	16.634	1.23691	0.00190219	6.82417	0.218289	5.03391	7.88985	4.96304	0.117724	1.11179	56.8
2000	1332	99.9933	291.667	-1.22045e+06	40.1729	149.009	2.238	55.8075	0.160868	16.634	1.23715	0.00190219	6.82395	0.218289	5.03391	7.88984	4.96304	0.117724	1.11179	56.8
2000	1331	99.9933	291.574	-1.22059e+06	40.1693	149.008	2.242	55.8075	0.160868	16.634	1.2374	0.00190219	6.82372	0.218289	5.03391	7.88984	4.96304	0.117724	1.11179	56.8
2000	1330	99.9933	291.482	-1.22074e+06	40.1658	149.008	2.246	55.8075	0.160868	16.634	1.23765	0.00190219	6.82349	0.218289	5.03391	7.88984	4.96304	0.117724	1.11179	56.8
2000	1329	99.9934	291.389	-1.22089e+06	40.1623	149.007	2.251	55.8075	0.160868	16.634	1.23791	0.00190219	6.82326	0.218289	5.03391	7.88984	4.96304	0.117724	1.11179	56.8
2000	1328	99.9934	291.296	-1.22104e+06	40.1588	149.007	2.255	55.8075	0.160868	16.634	1.23816	0.00190219	6.82303	0.218289	5.03391	7.88984	4.96304	0.117724	1.11179	56.8
2000	1327	99.9934	291.203	-1.22119e+06	40.1553	149.007	2.259	55.8075	0.160868	16.634	1.23842	0.00190219	6.8228	0.218289	5.0339	7.88983	4.96304	0.117724	1.11179	56.8
2000	1326	99.9934	291.11	-1.22134e+06	40.1518	149.006	2.263	55.8075	0.160867	16.634	1.23868	0.00190219	6.82256	0.218289	5.0339	7.88983	4.96303	0.117724	1.11179	56.8
2000	1325	99.9935	291.016	-1.22149e+06	40.1482	149.006	2.267	55.8074	0.160867	16.634	1.23894	0.00190219	6.82233	0.218289	5.0339	7.88983	4.96303	0.117724	1.11179	56.8
2000	1324	99.9935	290.923	-1.22164e+06	40.1447	149.006	2.271	55.8074	0.160867	16.634	1.2392	0.00190219	6.82209	0.218289	5.0339	7.88983	4.96303	0.117724	1.11179	56.8
2000	1323	99.9935	290.83	-1.22179e+06	40.1412	149.005	2.275	55.8074	0.160867	16.634	1.23946	0.00190219	6.82185	0.218288	5.0339	7.88983	4.96303	0.117723	1.11179	56.8
2000	1322	99.9935	290.737	-1.22194e+06	40.1377	149.005	2.28	55.8074	0.160867	16.634	1.23973	0.00190219	6.82161	0.218288	5.0339	7.88982	4.96303	0.117723	1.11179	56.8
2000	1321	99.9936	290.643	-1.22209e+06	40.1342	149.004	2.284	55.8074	0.160867	16.6339	1.23999	0.00190219	6.82137	0.218288	5.0339	7.88982	4.96303	0.117723	1.11179	56.8
2000	1320	99.9936	290.55	-1.22224e+06	40.1307	149.004	2.288	55.8074	0.160867	16.6339	1.24026	0.00190219	6.82112	0.218288	5.03389	7.88982	4.96303	0.117723	1.11179	56.8
2000	1319	99.9936	290.456	-1.22239e+06	40.1272	149.004	2.292	55.8073	0.160867	16.6339	1.24053	0.00190218	6.82088	0.218288	5.03389	7.88982	4.96303	0.117723	1.11179	56.8
2000	1318	99.9936	290.363	-1.22254e+06	40.1237	149.003	2.296	55.8073	0.160867	16.6339	1.24081	0.00190218	6.82063	0.218288	5.03389	7.88981	4.96302	0.117723	1.11179	56.8
2000	1317	99.9937	290.269	-1.22269e+06	40.1202	149.003	2.301	55.8073	0.160867	16.6339	1.24108	0.00190218	6.82038	0.218288	5.03389	7.88981	4.96302	0.117723	1.11179	56.8
2000	1316	99.9937	290.175	-1.22284e+06	40.1166	149.003	2.305	55.8073	0.160867	16.6339	1.24136	0.00190218	6.82013	0.218288	5.03389	7.88981	4.96302	0.117723	1.11179	56.8
2000	1315	99.9937	290.082	-1.22298e+06	40.1131	149.002	2.309	55.8073	0.160867	16.6339	1.24163	0.00190218	6.81988	0.218288	5.03389	7.88981	4.96302	0.117723	1.11179	56.8
2000	1314	99.9938	289.988	-1.22313e+06	40.1096	149.002	2.313	55.8073	0.160867	16.6339	1.24191	0.00190218	6.81962	0.218288	5.03389	7.88981	4.96302	0.117723	1.11179	56.8
2000	1313	99.9938	289.894	-1.22328e+06	40.1061	149.001	2.317	55.8073	0.160867	16.6339	1.2422	0.00190218	6.81937	0.218288	5.03388	7.8898	4.96302	0.117723	1.11179	56.8
2000	1312	99.9938	289.8	-1.22343e+06	40.1026	149.001	2.322	55.8072	0.160867	16.6339	1.24248	0.00190218	6.81911	0.218288	5.03388	7.8898	4.96302	0.117723	1.11179	56.8
2000	1311	99.9938	289.706	-1.22358e+06	40.0991	149.001	2.326	55.8072	0.160867	16.6339	1.24276	0.00190218	6.81885	0.218288	5.03388	7.8898	4.96301	0.117723	1.11179	56.8
2000	1310	99.9939	289.612	-1.22373e+06	40.0956	149	2.33	55.8072	0.160867	16.6339	1.24305	0.00190218	6.81859	0.218288	5.03388	7.8898	4.96301	0.117723	1.11179	56.8
2000	1309	99.9939	289.518	-1.22388e+06	40.0921	149	2.334	55.8072	0.160867	16.6339	1.24334	0.00190218	6.81833	0.218288	5.03388	7.88979	4.96301	0.117723	1.11179	56.8
2000	1308	99.9939	289.424	-1.22403e+06	40.0886	149	2.338	55.8072	0.160867	16.6339	1.24363	0.00190218	6.81806	0.218288	5.03388	7.88979	4.96301	0.117723	1.11179	56.8
2000	1307	99.994	289.33	-1.22418e+06	40.0851	148.999	2.343	55.8072	0.160867	16.6339	1.24392	0.00190218	6.8178	0.218287	5.03388	7.88979	4.96301	0.117723	1.11179	56.8
2000	1306	99.994	289.235	-1.22433e+06	40.0816	148.999	2.347	55.8071	0.160867	16.6339	1.24422	0.00190218	6.81753	0.218287	5.03387	7.88979	4.96301	0.117723	1.11178	56.8
2000	1305	99.994	289.141	-1.22448e+06	40.078	148.998	2.351	55.8071	0.160867	16.6339	1.24451	0.00190218	6.81726	0.218287	5.03387	7.88979	4.96301	0.117723	1.11178	56.8
2000	1304	99.994	289.047	-1.22463e+06	40.0745	148.998	2.355	55.8071	0.160867	16.6339	1.24481	0.00190218	6.81699	0.218287	5.03387	7.88978	4.963	0.117723	1.11178	56.8
2000	1303	99.9941	288.952	-1.22478e+06	40.071	148.998	2.36	55.8071	0.160866	16.6339	1.24511	0.00190218	6.81672	0.218287	5.03387	7.88978	4.963	0.117723	1.11178	56.8
2000	1302	99.9941	288.858	-1.22493e+06	40.0675	148.997	2.364	55.8071	0.160866	16.6339	1.24542	0.00190218	6.81645	0.218287	5.03387	7.88978	4.963	0.117723	1.11178	56.8
2000	1301	99.9941	288.763	-1.22508e+06	40.064	148.997	2.368	55.8071	0.160866	16.6339	1.24572	0.00190217	6.81617	0.218287	5.03387	7.88978	4.963	0.117723	1.11178	56.8
2000	1300	99.9942	288.669	-1.22523e+06	40.0605	148.997	2.373	55.807	0.160866	16.6338	1.24602	0.00190217	6.81589	0.218287	5.03387	7.88977	4.963	0.117723	1.11178	56.8
2000	1299	99.9942	288.574	-1.22538e+06	40.057	148.996	2.377	55.807	0.160866	16.6338	1.24633	0.00190217	6.81561	0.218287	5.03386	7.88977	4.963	0.117723	1.11178	56.8
2000	1298	99.9942	288.479	-1.22552e+06	40.0535	148.996	2.381	55.807	0.160866	16.6338	1.24664	0.00190217	6.81533	0.218287	5.03386	7.88977	4.96299	0.117723	1.11178	56.8
2000	1297	99.9943	288.384	-1.22567e+06	40.05	148.996	2.385	55.807	0.160866	16.6338	1.24695	0.00190217	6.81505	0.218287	5.03386	7.88977	4.96299	0.117723	1.11178	56.8
2000	1296	99.9943	288.29	-1.22582e+06	40.0465	148.995	2.39	55.807	0.160866	16.6338	1.24727	0.00190217	6.81476	0.218287	5.03386	7.88976	4.96299	0.117723	1.11178	56.8
2000	1295	99.9943	288.195	-1.22597e+06	40.043	148.995	2.394	55.807	0.160866	16.6338	1.24758	0.00190217	6.81448	0.218287	5.03386	7.88976	4.96299	0.117723	1.11178	56.8
2000	1294	99.9944	288.1	-1.22612e+06	40.0395	148.995	2.398	55.8069	0.160866	16.6338	1.2479	0.00190217	6.81419	0.218287	5.03386	7.88976	4.96299	0.117722	1.11178	56.8
2000	1293	99.9944	288.005	-1.22627e+06	40.036	148.994	2.403	55.8069	0.160866	16.6338	1.24822	0.00190217	6.8139	0.218287	5.03385	7.88976	4.96299	0.117722	1.11178	56.8
2000	1292	99.9944	287.91	-1.22642e+06	40.0325	148.994	2.407	55.8069	0.160866	16.6338	1.24854	0.00190217	6.81361	0.218286	5.03385	7.88975	4.96299	0.117722	1.11178	56.8
2000	1291	99.9945	287.814	-1.22657e+06	40.029	148.994	2.411	55.8069	0.160866	16.6338	1.24886	0.00190217	6.81331	0.218286	5.03385	7.88975	4.96298	0.117722	1.11178	56.8
2000	1290	99.9945	287.719	-1.22672e+06	40.0255	148.993	2.416	55.8069	0.160866	16.6338	1.24919	0.00190217	6.81302	0.218286	5.03385	7.88975	4.96298	0.117722	1.11178	56.8
2000	1289	99.9945	287.624	-1.22687e+06	40.022	148.993	2.42	55.8068	0.160866	16.6338	1.24952	0.00190217	6.81272	0.218286	5.03385	7.88975	4.96298	0.117722	1.11178	56.8
2000	1288	99.9946	287.529	-1.22702e+06	40.0185	148.993	2.424	55.8068	0.160866	16.6338	1.24985	0.00190217	6.81242	0.218286	5.03385	7.88974	4.96298	0.117722	1.11178	56.8
2000	1287	99.9946	287.433	-1.22717e+06	40.015	148.992	2.429	55.8068	0.160866	16.6338	1.25018	0.00190217	6.81212	0.218286	5.03384	7.88974	4.96298	0.117722	1.11178	56.8
2000	1286	99.9946	287.338	-1.22732e+06	40.0115	148.992	2.433	55.8068	0.160866	16.6338	1.25051	0.00190217	6.81182	0.218286	5.03384	7.88974	4.96298	0.117722	1.11178	56.8
2000	1285	99.9947	287.242	-1.22747e+06	40.008	148.992	2.438	55.8068	0.160866	16.6338	1.25084	0.00190217	6.81152	0.218286	5.03384	7.88974	4.96297	0.117722	1.11178	56.8
2000	1284	99.9947	287.147	-1.22762e+06	40.0045	148.991	2.442	55.8068	0.160865	16.6338	1.25118	0.00190216	6.81121	0.218286	5.03384	7.88973	4.96297	0.117722	1.11178	56.8
2000	1283	99.9947	287.051	-1.22777e+06	40.001	148.991	2.446	55.8067	0.160865	16.6338	1.25152	0.00190216	6.8109	0.218286	5.03384	7.88973	4.96297	0.117722	1.11178	56.8
2000	1282	99.9948	286.955	-1.22792e+06	39.9975	148.99	2.451	55.8067	0.160865	16.6337	1.25186	0.00190216	6.81059	0.218286	5.03384	7.88973	4.96297	0.117722	1.11178	56.8
2000	1281	99.9948	286.86	-1.22807e+06	39.994	148.99	2.455	55.8067	0.160865	16.6337	1.2522	0.00190216	6.81028	0.218286	5.03383	7.88972	4.96297	0.117722	1.11178	56.8
2000	1280	99.9948	286.764	-1.22822e+06	39.9905	148.99	2.459	55.8067	0.160865	16.6337	1.25255	0.00190216	6.80997	0.218286	5.03383	7.88972	4.96297	0.117722	1.11178	56.9
2000	1279	99.9949	286.668	-1.22836e+06	39.987	148.99	2.464	55.8067	0.160865	16.6337	1.2529	0.00190216	6.80965	0.218286	5.03383	7.88972	4.96296	0.117722	1.11178	56.9
2000	1278	99.9949	286.572	-1.22851e+06	39.9835	148.989	2.468	55.8066	0.160865	16.6337	1.25325	0.00190216	6.80934	0.218285	5.03383	7.88972	4.96296	0.117722	1.11177	56.9
2000	1277	99.9949	286.476	-1.22866e+06	39.98	148.989	2.473	55.8066	0.160865	16.6337	1.2536	0.00190216	6.80902	0.218285	5.03383	7.88971	4.96296	0.117722	1.11177	56.9
2000	1276	99.995	286.38	-1.22881e+06	39.9765	148.989	2.477	55.8066	0.160865	16.6337	1.25395	0.00190216	6.8087	0.218285	5.03383	7.88971	4.96296	0.117722	1.11177	56.9
2000	1275	99.995	286.284	-1.22896e+06	39.973	148.988	2.481	55.8066	0.160865	16.6337	1.25431	0.00190216	6.80838	0.218285	5.03382	7.88971	4.96296	0.117722	1.11177	56.9
2000	1274	99.995	286.187	-1.22911e+06	39.9695	148.988	2.486	55.8066	0.160865	16.6337	1.25466	0.00190216	6.80805	0.218285	5.03382	7.88971	4.96295	0.117722	1.11177	56.9
2000	1273	99.9951	286.091	-1.22926e+06	39.9661	148.988	2.49	55.8065	0.160865	16.6337	1.25502	0.00190216	6.80772	0.218285	5.03382	7.8897	4.96295	0.117722	1.11177	56.9
2000	1272	99.9951	285.995	-1.22941e+06	39.9626	148.987	2.495	55.8065	0.160865	16.6337	1.25538	0.00190216	6.8074	0.218285	5.03382	7.8897	4.96295	0.117722	1.11177	56.9
2000	1271	99.9951	285.899	-1.22956e+06	39.9591	148.987	2.499	55.8065	0.160865	16.6337	1.25575	0.00190216	6.80707	0.218285	5.03382	7.8897	4.96295	0.117722	1.11177	56.9
2000	1270	99.9952	285.802	-1.22971e+06	39.9556	148.987	2.504	55.8065	0.160865	16.6337	1.25611	0.00190216	6.80673	0.218285	5.03381	7.88969	4.96295	0.117722	1.11177	56.9
2000	1269	99.9952	285.706	-1.22986e+06	39.9521	148.986	2.508	55.8065	0.160865	16.6337	1.25648	0.00190215	6.8064	0.218285	5.03381	7.88969	4.96295	0.117721	1.11177	56.9
2000	1268	99.9953	285.609	-1.23001e+06	39.9486	148.986	2.513	55.8064	0.160865	16.6337	1.25685	0.00190215	6.80607	0.218285	5.03381	7.88969	4.96294	0.117721	1.11177	56.9
2000	1267	99.9953	285.512	-1.23016e+06	39.9451	148.986	2.517	55.8064	0.160865	16.6337	1.25722	0.00190215	6.80573	0.218285	5.03381	7.88968	4.96294	0.117721	1.11177	56.9
2000	1266	99.9953	285.416	-1.23031e+06	39.9416	148.985	2.522	55.8064	0.160864	16.6337	1.2576	0.00190215	6.80539	0.218284	5.03381	7.88968	4.96294	0.117721	1.11177	56.9
2000	1265	99.9954	285.319	-1.23046e+06	39.9381	148.985	2.526	55.8064	0.160864	16.6336	1.25797	0.00190215	6.80505	0.218284	5.03381	7.88968	4.96294	0.117721	1.11177	56.9
2000	1264	99.9954	285.222	-1.23061e+06	39.9346	148.985	2.531	55.8063	0.160864	16.6336	1.25835	0.00190215	6.8047	0.218284	5.0338	7.88968	4.96294	0.117721	1.11177	56.9
2000	1263	99.9954	285.125	-1.23076e+06	39.9311	148.984	2.535	55.8063	0.160864	16.6336	1.25873	0.00190215	6.80436	0.218284	5.0338	7.88967	4.96293	0.117721	1.11177	56.9
2000	1262	99.9955	285.028	-1.23091e+06	39.9277	148.984	2.54	55.8063	0.160864	16.6336	1.25911	0.00190215	6.80401	0.218284	5.0338	7.88967	4.96293	0.117721	1.11177	56.9
2000	1261	99.9955	284.931	-1.23106e+06	39.9242	148.984	2.544	55.8063	0.160864	16.6336	1.2595	0.00190215	6.80366	0.218284	5.0338	7.88967	4.96293	0.117721	1.11177	56.9
2000	1260	99.9956	284.834	-1.23121e+06	39.9207	148.983	2.549	55.8063	0.160864	16.6336	1.25988	0.00190215	6.80331	0.218284	5.0338	7.88966	4.96293	0.117721	1.11177	56.9
2000	1259	99.9956	284.737	-1.23136e+06	39.9172	148.983	2.553	55.8062	0.160864	16.6336	1.26027	0.00190215	6.80296	0.218284	5.03379	7.88966	4.96293	0.117721	1.11177	56.9
2000	1258	99.9956	284.64	-1.2315e+06	39.9137	148.983	2.558	55.8062	0.160864	16.6336	1.26066	0.00190215	6.8026	0.218284	5.03379	7.88966	4.96293	0.117721	1.11177	56.9
2000	1257	99.9957	284.543	-1.23165e+06	39.9102	148.983	2.562	55.8062	0.160864	16.6336	1.26106	0.00190215	6.80225	0.218284	5.03379	7.88965	4.96292	0.117721	1.11177	56.9
2000	1256	99.9957	284.445	-1.2318e+06	39.9067	148.982	2.567	55.8062	0.160864	16.6336	1.26145	0.00190214	6.80189	0.218284	5.03379	7.88965	4.96292	0.117721	1.11177	56.9
2000	1255	99.9958	284.348	-1.23195e+06	39.9032	148.982	2.571	55.8062	0.160864	16.6336	1.26185	0.00190214	6.80153	0.218284	5.03379	7.88965	4.96292	0.117721	1.11177	56.9
2000	1254	99.9958	284.251	-1.2321e+06	39.8998	148.982	2.576	55.8061	0.160864	16.6336	1.26225	0.00190214	6.80116	0.218283	5.03378	7.88965	4.96292	0.117721	1.11176	56.9
2000	1253	99.9958	284.153	-1.23225e+06	39.8963	148.981	2.58	55.8061	0.160864	16.6336	1.26265	0.00190214	6.8008	0.218283	5.03378	7.88964	4.96292	0.117721	1.11176	56.9
2000	1252	99.9959	284.055	-1.2324e+06	39.8928	148.981	2.585	55.8061	0.160864	16.6336	1.26305	0.00190214	6.80043	0.218283	5.03378	7.88964	4.96291	0.117721	1.11176	56.9
2000	1251	99.9959	283.958	-1.23255e+06	39.8893	148.981	2.589	55.8061	0.160863	16.6336	1.26346	0.00190214	6.80006	0.218283	5.03378	7.88964	4.96291	0.117721	1.11176	56.9
2000	1250	99.996	283.86	-1.2327e+06	39.8858	148.98	2.594	55.806	0.160863	16.6335	1.26387	0.00190214	6.79969	0.218283	5.03378	7.88963	4.96291	0.117721	1.11176	56.9
2000	1249	99.996	283.762	-1.23285e+06	39.8823	148.98	2.599	55.806	0.160863	16.6335	1.26428	0.00190214	6.79932	0.218283	5.03377	7.88963	4.96291	0.117721	1.11176	56.9
2000	1248	99.996	283.665	-1.233e+06	39.8789	148.98	2.603	55.806	0.160863	16.6335	1.26469	0.00190214	6.79895	0.218283	5.03377	7.88963	4.9629	0.11772	1.11176	56.9
2000	1247	99.9961	283.567	-1.23315e+06	39.8754	148.98	2.608	55.806	0.160863	16.6335	1.26511	0.00190214	6.79857	0.218283	5.03377	7.88962	4.9629	0.11772	1.11176	56.9
2000	1246	99.9961	283.469	-1.2333e+06	39.8719	148.979	2.612	55.8059	0.160863	16.6335	1.26553	0.00190214	6.79819	0.218283	5.03377	7.88962	4.9629	0.11772	1.11176	56.9
2000	1245	99.9962	283.371	-1.23345e+06	39.8684	148.979	2.617	55.8059	0.160863	16.6335	1.26595	0.00190214	6.79781	0.218283	5.03377	7.88962	4.9629	0.11772	1.11176	56.9
2000	1244	99.9962	283.273	-1.2336e+06	39.8649	148.979	2.621	55.8059	0.160863	16.6335	1.26637	0.00190214	6.79743	0.218283	5.03376	7.88961	4.9629	0.11772	1.11176	56.9
2000	1243	99.9963	283.174	-1.23375e+06	39.8615	148.978	2.626	55.8059	0.160863	16.6335	1.26679	0.00190213	6.79704	0.218282	5.03376	7.88961	4.96289	0.11772	1.11176	56.9
2000	1242	99.9963	283.076	-1.2339e+06	39.858	148.978	2.631	55.8059	0.160863	16.6335	1.26722	0.00190213	6.79665	0.218282	5.03376	7.88961	4.96289	0.11772	1.11176	56.9
2000	1241	99.9963	282.978	-1.23405e+06	39.8545	148.978	2.635	55.8058	0.160863	16.6335	1.26765	0.00190213	6.79626	0.218282	5.03376	7.8896	4.96289	0.11772	1.11176	56.9
2000	1240	99.9964	282.88	-1.2342e+06	39.851	148.978	2.64	55.8058	0.160863	16.6335	1.26808	0.00190213	6.79587	0.218282	5.03375	7.8896	4.96289	0.11772	1.11176	56.9
2000	1239	99.9964	282.781	-1.23435e+06	39.8475	148.977	2.645	55.8058	0.160863	16.6335	1.26851	0.00190213	6.79548	0.218282	5.03375	7.8896	4.96289	0.11772	1.11176	56.9
2000	1238	99.9965	282.683	-1.2345e+06	39.8441	148.977	2.649	55.8058	0.160863	16.6335	1.26895	0.00190213	6.79508	0.218282	5.03375	7.88959	4.96288	0.11772	1.11176	56.9
2000	1237	99.9965	282.584	-1.23465e+06	39.8406	148.977	2.654	55.8057	0.160863	16.6335	1.26938	0.00190213	6.79469	0.218282	5.03375	7.88959	4.96288	0.11772	1.11176	56.9
2000	1236	99.9966	282.486	-1.2348e+06	39.8371	148.976	2.659	55.8057	0.160862	16.6334	1.26982	0.00190213	6.79429	0.218282	5.03375	7.88959	4.96288	0.11772	1.11176	56.9
2000	1235	99.9966	282.387	-1.23495e+06	39.8336	148.976	2.663	55.8057	0.160862	16.6334	1.27027	0.00190213	6.79389	0.218282	5.03374	7.88958	4.96288	0.11772	1.11176	56.9
2000	1234	99.9966	282.288	-1.23509e+06	39.8302	148.976	2.668	55.8057	0.160862	16.6334	1.27071	0.00190213	6.79348	0.218282	5.03374	7.88958	4.96288	0.11772	1.11176	56.9
2000	1233	99.9967	282.189	-1.23524e+06	39.8267	148.976	2.673	55.8056	0.160862	16.6334	1.27116	0.00190213	6.79308	0.218282	5.03374	7.88957	4.96287	0.11772	1.11175	56.9
2000	1232	99.9967	282.091	-1.23539e+06	39.8232	148.975	2.677	55.8056	0.160862	16.6334	1.27161	0.00190213	6.79267	0.218281	5.03374	7.88957	4.96287	0.11772	1.11175	56.9
2000	1231	99.9968	281.992	-1.23554e+06	39.8197	148.975	2.682	55.8056	0.160862	16.6334	1.27206	0.00190212	6.79226	0.218281	5.03373	7.88957	4.96287	0.11772	1.11175	56.9
2000	1230	99.9968	281.893	-1.23569e+06	39.8163	148.975	2.687	55.8056	0.160862	16.6334	1.27251	0.00190212	6.79185	0.218281	5.03373	7.88956	4.96287	0.11772	1.11175	56.9
2000	1229	99.9969	281.794	-1.23584e+06	39.8128	148.975	2.691	55.8055	0.160862	16.6334	1.27297	0.00190212	6.79143	0.218281	5.03373	7.88956	4.96286	0.11772	1.11175	56.9
2000	1228	99.9969	281.695	-1.23599e+06	39.8093	148.974	2.696	55.8055	0.160862	16.6334	1.27343	0.00190212	6.79101	0.218281	5.03373	7.88956	4.96286	0.117719	1.11175	56.9
2000	1227	99.997	281.595	-1.23614e+06	39.8058	148.974	2.701	55.8055	0.160862	16.6334	1.27389	0.00190212	6.7906	0.218281	5.03372	7.88955	4.96286	0.117719	1.11175	56.9
2000	1226	99.997	281.496	-1.23629e+06	39.8024	148.974	2.705	55.8055	0.160862	16.6334	1.27435	0.00190212	6.79018	0.218281	5.03372	7.88955	4.96286	0.117719	1.11175	56.9
2000	1225	99.9971	281.397	-1.23644e+06	39.7989	148.974	2.71	55.8054	0.160862	16.6334	1.27482	0.00190212	6.78975	0.218281	5.03372	7.88955	4.96285	0.117719	1.11175	56.9
2000	1224	99.9971	281.297	-1.23659e+06	39.7954	148.973	2.715	55.8054	0.160862	16.6334	1.27529	0.00190212	6.78933	0.218281	5.03372	7.88954	4.96285	0.117719	1.11175	56.9
2000	1223	99.9972	281.198	-1.23674e+06	39.7919	148.973	2.72	55.8054	0.160862	16.6333	1.27576	0.00190212	6.7889	0.218281	5.03372	7.88954	4.96285	0.117719	1.11175	56.9
2000	1222	99.9972	281.098	-1.23689e+06	39.7885	148.973	2.724	55.8053	0.160861	16.6333	1.27623	0.00190212	6.78847	0.21828	5.03371	7.88953	4.96285	0.117719	1.11175	56.9
2000	1221	99.9972	280.999	-1.23704e+06	39.785	148.973	2.729	55.8053	0.160861	16.6333	1.27671	0.00190212	6.78804	0.21828	5.03371	7.88953	4.96285	0.117719	1.11175	56.9
2000	1220	99.9973	280.899	-1.23719e+06	39.7815	148.972	2.734	55.8053	0.160861	16.6333	1.27719	0.00190211	6.7876	0.21828	5.03371	7.88953	4.96284	0.117719	1.11175	56.9
2000	1219	99.9973	280.799	-1.23734e+06	39.7781	148.972	2.739	55.8053	0.160861	16.6333	1.27767	0.00190211	6.78717	0.21828	5.03371	7.88952	4.96284	0.117719	1.11175	56.9
2000	1218	99.9974	280.7	-1.23749e+06	39.7746	148.972	2.743	55.8052	0.160861	16.6333	1.27815	0.00190211	6.78673	0.21828	5.0337	7.88952	4.96284	0.117719	1.11175	56.9
2000	1217	99.9974	280.6	-1.23764e+06	39.7711	148.972	2.748	55.8052	0.160861	16.6333	1.27864	0.00190211	6.78629	0.21828	5.0337	7.88952	4.96284	0.117719	1.11175	56.9
2000	1216	99.9975	280.5	-1.23779e+06	39.7677	148.971	2.753	55.8052	0.160861	16.6333	1.27912	0.00190211	6.78585	0.21828	5.0337	7.88951	4.96283	0.117719	1.11175	56.9
2000	1215	99.9975	280.4	-1.23794e+06	39.7642	148.971	2.758	55.8052	0.160861	16.6333	1.27961	0.00190211	6.7854	0.21828	5.0337	7.88951	4.96283	0.117719	1.11175	56.9
2000	1214	99.9976	280.3	-1.23809e+06	39.7607	148.971	2.763	55.8051	0.160861	16.6333	1.28011	0.00190211	6.78495	0.21828	5.03369	7.8895	4.96283	0.117719	1.11174	56.9
2000	1213	99.9976	280.2	-1.23824e+06	39.7573	148.971	2.767	55.8051	0.160861	16.6333	1.2806	0.00190211	6.7845	0.218279	5.03369	7.8895	4.96283	0.117719	1.11174	56.9
2000	1212	99.9977	280.1	-1.23839e+06	39.7538	148.97	2.772	55.8051	0.160861	16.6333	1.2811	0.00190211	6.78405	0.218279	5.03369	7.8895	4.96282	0.117719	1.11174	56.9
2000	1211	99.9977	279.999	-1.23854e+06	39.7503	148.97	2.777	55.805	0.160861	16.6333	1.2816	0.00190211	6.7836	0.218279	5.03369	7.88949	4.96282	0.117719	1.11174	56.9
2000	1210	99.9978	279.899	-1.23869e+06	39.7469	148.97	2.782	55.805	0.16086	16.6332	1.2821	0.00190211	6.78314	0.218279	5.03368	7.88949	4.96282	0.117718	1.11174	56.9
2000	1209	99.9978	279.799	-1.23884e+06	39.7434	148.97	2.787	55.805	0.16086	16.6332	1.28261	0.0019021	6.78268	0.218279	5.03368	7.88948	4.96282	0.117718	1.11174	56.9
2000	1208	99.9979	279.698	-1.23899e+06	39.7399	148.969	2.791	55.805	0.16086	16.6332	1.28312	0.0019021	6.78222	0.218279	5.03368	7.88948	4.96281	0.117718	1.11174	57
2000	1207	99.9979	279.598	-1.23914e+06	39.7365	148.969	2.796	55.8049	0.16086	16.6332	1.28363	0.0019021	6.78176	0.218279	5.03368	7.88948	4.96281	0.117718	1.11174	57
2000	1206	99.998	279.5	-1.23928e+06	39.733	144.228	2.801	55.8049	0.16086	16.6332	1.28414	0.0019021	6.78129	0.218279	5.03367	7.88947	4.96281	0.117718	1.11174	57
2000	1205	99.998	279.402	-1.23943e+06	39.7296	144.226	2.806	55.8049	0.16086	16.6332	1.28465	0.0019021	6.78082	0.218279	5.03367	7.88947	4.96281	0.117718	1.11174	57
2000	1204	99.9981	279.305	-1.23957e+06	39.7261	144.225	2.811	55.8048	0.16086	16.6332	1.28517	0.0019021	6.78035	0.218278	5.03367	7.88946	4.9628	0.117718	1.11174	57
2000	1203	99.9981	279.207	-1.23972e+06	39.7226	144.224	2.816	55.8048	0.16086	16.6332	1.28569	0.0019021	6.77988	0.218278	5.03367	7.88946	4.9628	0.117718	1.11174	57
2000	1202	99.9982	279.11	-1.23986e+06	39.7192	144.222	2.821	55.8048	0.16086	16.6332	1.28622	0.0019021	6.77941	0.218278	5.03366	7.88946	4.9628	0.117718	1.11174	57
2000	1201	99.9983	279.012	-1.24001e+06	39.7157	144.221	2.825	55.8048	0.16086	16.6332	1.28674	0.0019021	6.77893	0.218278	5.03366	7.88945	4.9628	0.117718	1.11174	57
2000	1200	99.9983	278.914	-1.24015e+06	39.7122	144.22	2.83	55.8047	0.16086	16.6332	1.28727	0.0019021	6.77845	0.218278	5.03366	7.88945	4.96279	0.117718	1.11174	57
2000	1199	99.9984	278.816	-1.2403e+06	39.7088	144.218	2.835	55.8047	0.16086	16.6331	1.2878	0.00190209	6.77797	0.218278	5.03365	7.88944	4.96279	0.117718	1.11174	57
2000	1198	99.9984	278.718	-1.24044e+06	39.7053	144.217	2.84	55.8047	0.160859	16.6331	1.28834	0.00190209	6.77748	0.218278	5.03365	7.88944	4.96279	0.117718	1.11174	57
2000	1197	99.9985	278.621	-1.24059e+06	39.7019	144.215	2.845	55.8046	0.160859	16.6331	1.28887	0.00190209	6.777	0.218278	5.03365	7.88943	4.96278	0.117718	1.11173	57
2000	1196	99.9985	278.522	-1.24073e+06	39.6984	144.214	2.85	55.8046	0.160859	16.6331	1.28941	0.00190209	6.77651	0.218278	5.03365	7.88943	4.96278	0.117718	1.11173	57
2000	1195	99.9986	278.424	-1.24088e+06	39.695	144.213	2.855	55.8046	0.160859	16.6331	1.28995	0.00190209	6.77602	0.218277	5.03364	7.88943	4.96278	0.117718	1.11173	57
2000	1194	99.9986	278.326	-1.24102e+06	39.6915	144.211	2.86	55.8045	0.160859	16.6331	1.2905	0.00190209	6.77552	0.218277	5.03364	7.88942	4.96278	0.117717	1.11173	57
2000	1193	99.9987	278.228	-1.24117e+06	39.688	144.21	2.865	55.8045	0.160859	16.6331	1.29104	0.00190209	6.77503	0.218277	5.03364	7.88942	4.96277	0.117717	1.11173	57
2000	1192	99.9987	278.13	-1.24131e+06	39.6846	144.208	2.87	55.8045	0.160859	16.6331	1.29159	0.00190209	6.77453	0.218277	5.03364	7.88941	4.96277	0.117717	1.11173	57
2000	1191	99.9988	278.031	-1.24146e+06	39.6811	144.207	2.875	55.8045	0.160859	16.6331	1.29214	0.00190209	6.77403	0.218277	5.03363	7.88941	4.96277	0.117717	1.11173	57
2000	1190	99.9989	277.933	-1.2416e+06	39.6777	144.205	2.88	55.8044	0.160859	16.6331	1.2927	0.00190209	6.77352	0.218277	5.03363	7.8894	4.96277	0.117717	1.11173	57
2000	1189	99.9989	277.834	-1.24175e+06	39.6742	144.204	2.885	55.8044	0.160859	16.6331	1.29326	0.00190208	6.77302	0.218277	5.03363	7.8894	4.96276	0.117717	1.11173	57
2000	1188	99.999	277.736	-1.24189e+06	39.6708	144.203	2.889	55.8044	0.160859	16.633	1.29382	0.00190208	6.77251	0.218277	5.03362	7.8894	4.96276	0.117717	1.11173	57
2000	1187	99.999	277.637	-1.24204e+06	39.6673	144.201	2.894	55.8043	0.160859	16.633	1.29438	0.00190208	6.772	0.218276	5.03362	7.88939	4.96276	0.117717	1.11173	57
2000	1186	99.9991	277.539	-1.24218e+06	39.6639	144.2	2.899	55.8043	0.160858	16.633	1.29494	0.00190208	6.77148	0.218276	5.03362	7.88939	4.96275	0.117717	1.11173	57
2000	1185	99.9991	277.44	-1.24233e+06	39.6604	144.198	2.904	55.8043	0.160858	16.633	1.29551	0.00190208	6.77097	0.218276	5.03362	7.88938	4.96275	0.117717	1.11173	57
2000	1184	99.9992	277.341	-1.24247e+06	39.657	144.197	2.909	55.8042	0.160858	16.633	1.29608	0.00190208	6.77045	0.218276	5.03361	7.88938	4.96275	0.117717	1.11173	57
2000	1183	99.9992	277.242	-1.24262e+06	39.6535	144.195	2.914	55.8042	0.160858	16.633	1.29666	0.00190208	6.76993	0.218276	5.03361	7.88937	4.96275	0.117717	1.11173	57
2000	1182	99.9993	277.143	-1.24276e+06	39.6501	144.194	2.919	55.8042	0.160858	16.633	1.29723	0.00190208	6.76941	0.218276	5.03361	7.88937	4.96274	0.117717	1.11173	57
2000	1181	99.9994	277.044	-1.24291e+06	39.6466	144.192	2.924	55.8041	0.160858	16.633	1.29781	0.00190208	6.76888	0.218276	5.0336	7.88936	4.96274	0.117717	1.11172	57
2000	1180	99.9994	276.945	-1.24305e+06	39.6432	144.191	2.929	55.8041	0.160858	16.633	1.2984	0.00190207	6.76835	0.218276	5.0336	7.88936	4.96274	0.117717	1.11172	57
2000	1179	99.9995	276.846	-1.2432e+06	39.6397	144.189	2.934	55.8041	0.160858	16.633	1.29898	0.00190207	6.76782	0.218275	5.0336	7.88935	4.96273	0.117716	1.11172	57
2000	1178	99.9995	276.747	-1.24334e+06	39.6363	144.188	2.94	55.804	0.160858	16.633	1.29957	0.00190207	6.76729	0.218275	5.0336	7.88935	4.96273	0.117716	1.11172	57
2000	1177	99.9996	276.647	-1.24349e+06	39.6328	144.186	2.945	55.804	0.160858	16.6329	1.30016	0.00190207	6.76675	0.218275	5.03359	7.88935	4.96273	0.117716	1.11172	57
2000	1176	99.9997	276.548	-1.24363e+06	39.6294	144.185	2.95	55.804	0.160857	16.6329	1.30075	0.00190207	6.76621	0.218275	5.03359	7.88934	4.96273	0.117716	1.11172	57
2000	1175	99.9997	276.449	-1.24378e+06	39.6259	144.183	2.955	55.8039	0.160857	16.6329	1.30135	0.00190207	6.76567	0.218275	5.03359	7.88934	4.96272	0.117716	1.11172	57
2000	1174	99.9998	276.349	-1.24392e+06	39.6225	144.182	2.96	55.8039	0.160857	16.6329	1.30195	0.00190207	6.76513	0.218275	5.03358	7.88933	4.96272	0.117716	1.11172	57
2000	1173	99.9998	276.249	-1.24407e+06	39.619	144.18	2.965	55.8039	0.160857	16.6329	1.30255	0.00190207	6.76458	0.218275	5.03358	7.88933	4.96272	0.117716	1.11172	57
2000	1172	99.9999	276.15	-1.24421e+06	39.6156	144.178	2.97	55.8038	0.160857	16.6329	1.30315	0.00190207	6.76403	0.218275	5.03358	7.88932	4.96271	0.117716	1.11172	57
2000	1171	100	276.05	-1.24436e+06	39.6121	144.177	2.975	55.8038	0.160857	16.6329	1.30376	0.00190206	6.76348	0.218274	5.03357	7.88932	4.96271	0.117716	1.11172	57
2000	1170	100	275.95	-1.2445e+06	39.6087	144.175	2.98	55.8038	0.160857	16.6329	1.30437	0.00190206	6.76293	0.218274	5.03357	7.88931	4.96271	0.117716	1.11172	57
2000	1169	100	275.851	-1.24465e+06	39.6053	144.174	2.985	55.8037	0.160857	16.6329	1.30498	0.00190206	6.76237	0.218274	5.03357	7.88931	4.9627	0.117716	1.11172	57
2000	1168	100	275.751	-1.24479e+06	39.6018	144.172	2.99	55.8037	0.160857	16.6329	1.3056	0.00190206	6.76181	0.218274	5.03356	7.8893	4.9627	0.117716	1.11172	57
2000	1167	100	275.651	-1.24494e+06	39.5984	144.171	2.995	55.8037	0.160857	16.6328	1.30622	0.00190206	6.76125	0.218274	5.03356	7.8893	4.9627	0.117716	1.11172	57
2000	1166	100	275.551	-1.24508e+06	39.5949	144.169	3	55.8036	0.160856	16.6328	1.30684	0.00190206	6.76068	0.218274	5.03356	7.88929	4.9627	0.117716	1.11171	57
2000	1165	100	275.451	-1.24523e+06	39.5915	144.167	3.006	55.8036	0.160856	16.6328	1.30747	0.00190206	6.76012	0.218274	5.03356	7.88929	4.96269	0.117715	1.11171	57
2000	1164	100	275.35	-1.24537e+06	39.5881	144.166	3.011	55.8036	0.160856	16.6328	1.30809	0.00190206	6.75955	0.218273	5.03355	7.88928	4.96269	0.117715	1.11171	57
2000	1163	100	275.25	-1.24552e+06	39.5846	144.164	3.016	55.8035	0.160856	16.6328	1.30872	0.00190205	6.75897	0.218273	5.03355	7.88928	4.96269	0.117715	1.11171	57
2000	1162	100.001	275.15	-1.24566e+06	39.5812	144.163	3.021	55.8035	0.160856	16.6328	1.30936	0.00190205	6.7584	0.218273	5.03355	7.88927	4.96268	0.117715	1.11171	57
2000	1161	100.001	275.049	-1.24581e+06	39.5777	144.161	3.026	55.8035	0.160856	16.6328	1.30999	0.00190205	6.75782	0.218273	5.03354	7.88927	4.96268	0.117715	1.11171	57
2000	1160	100.001	274.949	-1.24595e+06	39.5743	144.159	3.031	55.8034	0.160856	16.6328	1.31063	0.00190205	6.75724	0.218273	5.03354	7.88926	4.96268	0.117715	1.11171	57
2000	1159	100.001	274.848	-1.2461e+06	39.5709	144.158	3.036	55.8034	0.160856	16.6328	1.31128	0.00190205	6.75666	0.218273	5.03354	7.88926	4.96267	0.117715	1.11171	57
2000	1158	100.001	274.748	-1.24624e+06	39.5674	144.156	3.042	55.8034	0.160856	16.6327	1.31192	0.00190205	6.75607	0.218273	5.03353	7.88925	4.96267	0.117715	1.11171	57
2000	1157	100.001	274.647	-1.24639e+06	39.564	144.154	3.047	55.8033	0.160856	16.6327	1.31257	0.00190205	6.75548	0.218272	5.03353	7.88925	4.96267	0.117715	1.11171	57
2000	1156	100.001	274.547	-1.24654e+06	39.5605	144.153	3.052	55.8033	0.160855	16.6327	1.31322	0.00190205	6.75489	0.218272	5.03353	7.88924	4.96266	0.117715	1.11171	57
2000	1155	100.001	274.446	-1.24668e+06	39.5571	144.151	3.057	55.8032	0.160855	16.6327	1.31388	0.00190204	6.7543	0.218272	5.03352	7.88924	4.96266	0.117715	1.11171	57.1
2000	1154	100.001	274.345	-1.24683e+06	39.5537	144.149	3.062	55.8032	0.160855	16.6327	1.31453	0.00190204	6.7537	0.218272	5.03352	7.88923	4.96266	0.117715	1.11171	57.1
2000	1153	99.3441	272.511	-1.23854e+06	39.3055	143.144	3.071	55.8219	0.161862	16.6364	1.31819	0.00191462	6.76088	0.219715	4.96781	7.8899	4.98391	0.118445	1.11906	56.7
2000	1152	98.4783	270.125	-1.22736e+06	38.9733	141.844	3.075	55.8531	0.163238	16.5898	1.32548	0.00193145	6.78973	0.221647	4.9309	7.87009	5.00581	0.119393	1.1289	56.4
2000	1151	97.5836	267.67	-1.21591e+06	38.6326	140.498	3.08	55.888	0.164587	16.5616	1.33166	0.00194916	6.81713	0.223679	4.88886	7.83147	5.03142	0.120402	1.13925	56.1
2000	1150	96.6719	265.174	-1.20429e+06	38.2868	139.128	3.086	55.9257	0.16597	16.5373	1.33715	0.00196754	6.84092	0.225789	4.84531	7.78985	5.05859	0.121452	1.14999	55.8
2000	1149	95.7779	262.725	-1.1929e+06	37.9475	137.785	3.092	55.9631	0.167351	16.513	1.34263	0.00198591	6.86459	0.227896	4.80215	7.74851	5.0856	0.1225	1.16072	55.5
2000	1148	94.9009	260.323	-1.18173e+06	37.6146	136.467	3.098	56.0003	0.168729	16.4885	1.34809	0.00200426	6.8881	0.230002	4.75937	7.70744	5.11245	0.123546	1.17145	55.2
2000	1147	94.0404	257.966	-1.17077e+06	37.2879	135.175	3.104	56.0374	0.170104	16.4638	1.35354	0.0020226	6.91147	0.232107	4.71698	7.66665	5.13913	0.124591	1.18217	54.9
2000	1146	93.196	255.653	-1.16002e+06	36.9673	133.908	3.11	56.0743	0.171477	16.439	1.35898	0.00204093	6.9347	0.23421	4.67495	7.62613	5.16565	0.125633	1.19288	54.6
2000	1145	92.3671	253.382	-1.14946e+06	36.6524	132.664	3.116	56.111	0.172848	16.4141	1.36441	0.00205924	6.95778	0.236312	4.6333	7.58588	5.19201	0.126673	1.20359	54.3
2000	1144	91.5534	251.152	-1.1391e+06	36.3433	131.443	3.121	56.1476	0.174216	16.3891	1.36982	0.00207755	6.98072	0.238412	4.59202	7.5459	5.21821	0.127711	1.21428	54
2000	1143	90.7544	248.962	-1.12893e+06	36.0397	130.245	3.127	56.1839	0.175582	16.3639	1.37522	0.00209584	7.00353	0.240511	4.5511	7.50618	5.24425	0.128748	1.22497	53.7
2000	1142	89.9698	246.811	-1.11894e+06	35.7415	129.068	3.133	56.2201	0.176945	16.3386	1.3806	0.00211411	7.0262	0.242608	4.51054	7.46672	5.27014	0.129782	1.23566	53.4
2000	1141	89.1991	244.698	-1.10914e+06	35.4486	127.913	3.138	56.2561	0.178306	16.3131	1.38598	0.00213238	7.04873	0.244705	4.47034	7.42752	5.29587	0.130815	1.24633	53.1
2000	1140	88.442	242.622	-1.0995e+06	35.1607	126.779	3.144	56.292	0.179665	16.2876	1.39135	0.00215063	7.07113	0.246799	4.43049	7.38858	5.32145	0.131845	1.257	52.8
2000	1139	87.698	240.582	-1.09003e+06	34.8778	125.664	3.149	56.3276	0.181022	16.2619	1.3967	0.00216888	7.0934	0.248893	4.39098	7.3499	5.34688	0.132874	1.26767	52.5
2000	1138	86.967	238.577	-1.08073e+06	34.5997	124.569	3.155	56.3631	0.182377	16.2361	1.40204	0.00218711	7.11554	0.250985	4.35183	7.31147	5.37215	0.133901	1.27832	52.2
2000	1137	86.2484	236.606	-1.07159e+06	34.3263	123.494	3.16	56.3985	0.18373	16.2101	1.40738	0.00220533	7.13756	0.253076	4.31301	7.2733	5.39727	0.134926	1.28897	51.9
2000	1136	85.542	234.669	-1.06261e+06	34.0575	122.436	3.165	56.4336	0.18508	16.1841	1.4127	0.00222354	7.15945	0.255166	4.27454	7.23537	5.42224	0.13595	1.29962	51.6
2000	1135	84.8476	232.763	-1.05378e+06	33.7932	121.397	3.171	56.4686	0.186429	16.1579	1.41802	0.00224174	7.18122	0.257255	4.2364	7.19769	5.44707	0.136971	1.31025	51.3
2000	1134	84.1646	230.889	-1.04509e+06	33.5332	120.376	3.176	56.5034	0.187775	16.1316	1.42332	0.00225993	7.20286	0.259342	4.19859	7.16025	5.47175	0.137991	1.32088	51
2000	1133	83.493	229.046	-1.03655e+06	33.2774	119.371	3.181	56.538	0.18912	16.1052	1.42862	0.00227811	7.22439	0.261428	4.16111	7.12306	5.49628	0.139009	1.33151	50.7
2000	1132	82.8323	227.233	-1.02815e+06	33.0258	118.384	3.186	56.5725	0.190462	16.0786	1.43391	0.00229628	7.2458	0.263513	4.12395	7.08611	5.52066	0.140025	1.34213	50.4
2000	1131	82.1824	225.448	-1.01989e+06	32.7782	117.412	3.192	56.6068	0.191803	16.052	1.43919	0.00231444	7.26709	0.265597	4.08712	7.0494	5.5449	0.141039	1.35274	50.1
2000	1130	81.5429	223.693	-1.01176e+06	32.5345	116.457	3.197	56.641	0.193142	16.0252	1.44446	0.00233259	7.28827	0.26768	4.0506	7.01292	5.569	0.142052	1.36335	49.8
2000	1129	80.9136	221.965	-1.00376e+06	32.2947	115.517	3.202	56.6749	0.194479	15.9983	1.44973	0.00235073	7.30933	0.269762	4.0144	6.97669	5.59296	0.143063	1.37396	49.5
2000	1128	80.2943	220.264	-995893	32.0586	114.592	3.207	56.7088	0.195814	15.9713	1.45499	0.00236887	7.33029	0.271843	3.97851	6.94068	5.61678	0.144072	1.38455	49.2
2000	1127	79.6846	218.589	-988146	31.8261	113.682	3.212	56.7424	0.197148	15.9442	1.46024	0.00238699	7.35113	0.273923	3.94293	6.90491	5.64045	0.145079	1.39515	48.9
2000	1126	79.0844	216.941	-980521	31.5972	112.786	3.217	56.7759	0.19848	15.917	1.46549	0.00240511	7.37186	0.276002	3.90766	6.86936	5.66399	0.146085	1.40574	48.6
2000	1125	78.4935	215.317	-973014	31.3717	111.905	3.221	56.8092	0.19981	15.8897	1.47072	0.00242321	7.39249	0.27808	3.87268	6.83405	5.68739	0.147089	1.41632	48.3
2000	1124	77.9115	213.718	-965622	31.1497	111.037	3.226	56.8424	0.201138	15.8623	1.47596	0.00244131	7.41301	0.280157	3.83801	6.79896	5.71065	0.148091	1.4269	48
2000	1123	77.3384	212.143	-958343	30.9309	110.182	3.231	56.8754	0.202465	15.8348	1.48118	0.0024594	7.43342	0.282233	3.80363	6.76409	5.73378	0.149092	1.43747	47.7
2000	1122	76.7739	210.592	-951174	30.7154	109.341	3.236	56.9082	0.203791	15.8072	1.4864	0.00247749	7.45374	0.284308	3.76955	6.72944	5.75677	0.150091	1.44804	47.4
2000	1121	76.2178	209.063	-944112	30.503	108.512	3.24	56.9409	0.205114	15.7794	1.49162	0.00249556	7.47395	0.286382	3.73576	6.69502	5.77963	0.151088	1.45861	47.1
2000	1120	75.6699	207.557	-937156	30.2938	107.696	3.245	56.9734	0.206437	15.7516	1.49683	0.00251363	7.49406	0.288456	3.70225	6.66081	5.80236	0.152084	1.46917	46.8
2000	1119	75.13	206.073	-930302	30.0875	106.892	3.25	57.0058	0.207758	15.7237	1.50204	0.00253169	7.51407	0.290529	3.66903	6.62683	5.82495	0.153078	1.47972	46.5
2000	1118	74.598	204.61	-923548	29.8842	106.1	3.254	57.038	0.209077	15.6956	1.50724	0.00254975	7.53399	0.292601	3.63609	6.59305	5.84742	0.15407	1.49028	46.2
2000	1117	74.0736	203.168	-916893	29.6838	105.319	3.259	57.0701	0.210396	15.6675	1.51244	0.0025678	7.5538	0.294672	3.60342	6.55949	5.86975	0.155061	1.50083	46
2000	1116	73.5568	201.746	-910333	29.4862	104.55	3.263	57.102	0.211712	15.6393	1.51763	0.00258584	7.57353	0.296743	3.57104	6.52614	5.89195	0.15605	1.51137	45.7
2000	1115	73.0472	200.344	-903867	29.2913	103.792	3.268	57.1337	0.213028	15.611	1.52282	0.00260388	7.59315	0.298813	3.53892	6.493	5.91403	0.157038	1.52192	45.4
2000	1114	72.5448	198.962	-897492	29.0991	103.045	3.272	57.1653	0.214342	15.5825	1.528	0.00262191	7.61269	0.300882	3.50708	6.46007	5.93598	0.158024	1.53246	45.1
2000	1113	72.0495	197.599	-891207	28.9096	102.309	3.277	57.1967	0.215655	15.554	1.53319	0.00263994	7.63213	0.302951	3.47551	6.42735	5.95781	0.159008	1.54299	44.8
2000	1112	71.5609	196.254	-885009	28.7227	101.583	3.281	57.228	0.216967	15.5254	1.53836	0.00265796	7.65148	0.305019	3.4442	6.39483	5.97951	0.159991	1.55353	44.5
2000	1111	71.0791	194.928	-878898	28.5382	100.867	3.285	57.2592	0.218278	15.4967	1.54354	0.00267598	7.67074	0.307086	3.41315	6.36251	6.00108	0.160973	1.56406	44.2
2000	1110	70.6039	193.62	-872870	28.3563	100.161	3.289	57.2901	0.219587	15.468	1.54871	0.00269399	7.68992	0.309153	3.38236	6.3304	6.02254	0.161952	1.57458	43.9
2000	1109	70.1351	192.329	-866924	28.1767	99.4649	3.294	57.321	0.220895	15.4391	1.55388	0.002712	7.709	0.31122	3.35183	6.29848	6.04387	0.162931	1.58511	43.7
2000	1108	69.6725	191.056	-861059	27.9995	98.7783	3.298	57.3516	0.222203	15.4101	1.55905	0.00273001	7.728	0.313286	3.32155	6.26676	6.06508	0.163908	1.59563	43.4
2000	1107	69.2161	189.799	-855272	27.8246	98.101	3.302	57.3822	0.223509	15.3811	1.56422	0.00274801	7.74692	0.315352	3.29153	6.23524	6.08617	0.164883	1.60615	43.1
2000	1106	68.7658	188.559	-849562	27.652	97.4329	3.306	57.4126	0.224814	15.352	1.56938	0.002766	7.76574	0.317417	3.26176	6.20392	6.10714	0.165857	1.61667	42.8
2000	1105	68.3213	187.335	-843928	27.4817	96.7737	3.31	57.4428	0.226119	15.3228	1.57454	0.002784	7.78449	0.319482	3.23223	6.17278	6.12799	0.166829	1.62719	42.5
2000	1104	67.8827	186.126	-838367	27.3134	96.1233	3.314	57.4729	0.227422	15.2935	1.5797	0.00280199	7.80315	0.321546	3.20295	6.14184	6.14872	0.1678	1.6377	42.2
2000	1103	67.4497	184.933	-832879	27.1474	95.4814	3.318	57.5028	0.228724	15.2641	1.58486	0.00281997	7.82173	0.323611	3.17391	6.11109	6.16934	0.16877	1.64822	42
2000	1102	67.0222	183.755	-827462	26.9834	94.848	3.322	57.5326	0.230026	15.2346	1.59002	0.00283796	7.84023	0.325674	3.1451	6.08053	6.18984	0.169738	1.65873	41.7
2000	1101	66.6002	182.592	-822114	26.8214	94.2228	3.326	57.5623	0.231327	15.2051	1.59518	0.00285594	7.85865	0.327738	3.11654	6.05016	6.21022	0.170705	1.66924	41.4
2000	1100	66.1835	181.444	-816834	26.6615	93.6057	3.33	57.5918	0.232627	15.1755	1.60033	0.00287392	7.87699	0.329802	3.08821	6.01997	6.23049	0.17167	1.67975	41.1
2000	1099	65.7721	180.31	-811621	26.5035	92.9965	3.334	57.6212	0.233926	15.1458	1.60549	0.0028919	7.89525	0.331865	3.06012	5.98997	6.25065	0.172634	1.69026	40.9
2000	1098	65.3657	179.19	-806473	26.3474	92.3951	3.337	57.6504	0.235224	15.116	1.61064	0.00290988	7.91344	0.333928	3.03225	5.96015	6.2707	0.173596	1.70077	40.6
2000	1097	64.9644	178.083	-801390	26.1933	91.8013	3.341	57.6795	0.236522	15.0861	1.6158	0.00292786	7.93154	0.335991	3.00462	5.93051	6.29063	0.174557	1.71127	40.3
2000	1096	64.568	176.99	-796369	26.0409	91.2149	3.345	57.7084	0.237819	15.0562	1.62095	0.00294583	7.94958	0.338053	2.97721	5.90105	6.31045	0.175517	1.72178	40
2000	1095	64.1764	175.91	-791409	25.8904	90.6358	3.348	57.7373	0.239115	15.0262	1.62611	0.00296381	7.96753	0.340116	2.95002	5.87177	6.33016	0.176476	1.73228	39.8
2000	1094	63.7895	174.843	-786511	25.7417	90.0639	3.352	57.7659	0.240411	14.9961	1.63126	0.00298178	7.98541	0.342179	2.92306	5.84267	6.34977	0.177433	1.74279	39.5
2000	1093	63.4073	173.789	-781671	25.5947	89.499	3.356	57.7944	0.241706	14.966	1.63641	0.00299975	8.00322	0.344241	2.89631	5.81375	6.36926	0.178388	1.7533	39.2
2000	1092	63.0297	172.747	-776889	25.4495	88.941	3.359	57.8228	0.243001	14.9357	1.64157	0.00301773	8.02096	0.346304	2.86978	5.78499	6.38865	0.179343	1.7638	38.9
2000	1091	62.6565	171.717	-772165	25.3059	88.3897	3.363	57.8511	0.244295	14.9055	1.64672	0.0030357	8.03862	0.348367	2.84347	5.75642	6.40793	0.180296	1.77431	38.7
2000	1090	62.2877	170.699	-767496	25.1639	87.8451	3.366	57.8792	0.245589	14.8751	1.65188	0.00305368	8.05621	0.350429	2.81737	5.72801	6.4271	0.181247	1.78481	38.4
2000	1089	61.9232	169.693	-762883	25.0236	87.307	3.37	57.9072	0.246882	14.8447	1.65704	0.00307165	8.07373	0.352492	2.79148	5.69977	6.44617	0.182198	1.79532	38.1
2000	1088	61.5629	168.699	-758323	24.8849	86.7753	3.373	57.935	0.248174	14.8142	1.66219	0.00308963	8.09118	0.354555	2.7658	5.67171	6.46514	0.183147	1.80582	37.9
2000	1087	61.2068	167.716	-753816	24.7477	86.2499	3.376	57.9627	0.249466	14.7836	1.66735	0.0031076	8.10856	0.356618	2.74033	5.64381	6.484	0.184095	1.81633	37.6
2000	1086	60.8547	166.744	-749361	24.6121	85.7306	3.38	57.9903	0.250758	14.753	1.67251	0.00312558	8.12587	0.358681	2.71506	5.61608	6.50276	0.185041	1.82684	37.3
2000	1085	60.5066	165.783	-744957	24.478	85.2173	3.383	58.0178	0.25205	14.7222	1.67768	0.00314356	8.14311	0.360745	2.69	5.58851	6.52141	0.185986	1.83735	37.1
2000	1084	60.1625	164.833	-740603	24.3453	84.71	3.386	58.0451	0.253341	14.6915	1.68284	0.00316155	8.16028	0.362808	2.66514	5.56111	6.53997	0.18693	1.84786	36.8
2000	1083	59.8222	163.893	-736298	24.2141	84.2085	3.39	58.0723	0.254632	14.6607	1.688	0.00317953	8.17738	0.364872	2.64047	5.53386	6.55842	0.187873	1.85837	36.5
2000	1082	59.4856	162.963	-732041	24.0843	83.7127	3.393	58.0993	0.255922	14.6298	1.69317	0.00319752	8.19442	0.366936	2.61601	5.50679	6.57677	0.188815	1.86888	36.3
2000	1081	59.1528	162.044	-727832	23.956	83.2226	3.396	58.1262	0.257213	14.5988	1.69834	0.00321551	8.21139	0.369001	2.59174	5.47987	6.59503	0.189755	1.8794	36
2000	1080	58.8237	161.135	-723669	23.829	82.7379	3.399	58.153	0.258503	14.5678	1.70351	0.0032335	8.2283	0.371065	2.56766	5.45311	6.61318	0.190694	1.88992	35.7
2000	1079	58.4981	160.235	-719552	23.7033	82.2587	3.402	58.1797	0.259793	14.5367	1.70868	0.0032515	8.24514	0.373131	2.54378	5.42651	6.63124	0.191632	1.90043	35.5
2000	1078	58.1761	159.345	-715480	23.579	81.7848	3.405	58.2062	0.261082	14.5056	1.71386	0.0032695	8.26192	0.375196	2.52008	5.40006	6.6492	0.192569	1.91095	35.2
2000	1077	57.8575	158.465	-711452	23.4559	81.3161	3.408	58.2326	0.262372	14.4744	1.71903	0.0032875	8.27863	0.377262	2.49658	5.37377	6.66707	0.193504	1.92148	35
2000	1076	57.5423	157.594	-707467	23.3342	80.8526	3.411	58.2589	0.263662	14.4431	1.72421	0.00330551	8.29527	0.379328	2.47326	5.34763	6.68484	0.194438	1.932	34.7
2000	1075	57.2304	156.732	-703526	23.2137	80.3941	3.414	58.2851	0.264951	14.4118	1.7294	0.00332352	8.31186	0.381395	2.45012	5.32165	6.70251	0.195371	1.94253	34.4
2000	1074	56.9219	155.879	-699626	23.0945	79.9405	3.417	58.3111	0.26624	14.3804	1.73458	0.00334153	8.32838	0.383463	2.42717	5.29582	6.7201	0.196303	1.95306	34.2
2000	1073	56.6166	155.035	-695767	22.9765	79.4919	3.42	58.337	0.26753	14.349	1.73977	0.00335955	8.34483	0.385531	2.4044	5.27014	6.73758	0.197234	1.96359	33.9
2000	1072	56.3144	154.199	-691949	22.8596	79.048	3.423	58.3628	0.268819	14.3175	1.74496	0.00337758	8.36123	0.387599	2.3818	5.24461	6.75498	0.198164	1.97413	33.7
2000	1071	56.0154	153.372	-688170	22.744	78.6089	3.426	58.3885	0.270108	14.286	1.75015	0.00339561	8.37756	0.389668	2.35939	5.21923	6.77228	0.199092	1.98466	33.4
2000	1070	55.7195	152.554	-684431	22.6295	78.1744	3.428	58.414	0.271397	14.2544	1.75535	0.00341364	8.39383	0.391738	2.33715	5.19399	6.78949	0.20002	1.99521	33.2
2000	1069	55.4265	151.744	-680730	22.5161	77.7445	3.431	58.4394	0.272687	14.2228	1.76055	0.00343168	8.41004	0.393808	2.31509	5.1689	6.80661	0.200946	2.00575	32.9
2000	1068	55.1366	150.942	-677067	22.4039	77.319	3.434	58.4647	0.273976	14.1911	1.76576	0.00344973	8.42619	0.395879	2.2932	5.14396	6.82364	0.201871	2.0163	32.7
2000	1067	54.8495	150.148	-673442	22.2928	76.8979	3.437	58.4899	0.275266	14.1593	1.77096	0.00346778	8.44228	0.397951	2.27148	5.11916	6.84058	0.202795	2.02685	32.4
2000	1066	54.5654	149.361	-669853	22.1827	76.4812	3.439	58.5149	0.276556	14.1275	1.77617	0.00348584	8.4583	0.400023	2.24993	5.0945	6.85744	0.203717	2.0374	32.2
2000	1065	54.2841	148.583	-666300	22.0737	76.0688	3.442	58.5399	0.277846	14.0957	1.78139	0.00350391	8.47427	0.402097	2.22855	5.06998	6.8742	0.204639	2.04796	31.9
2000	1064	54.0055	147.812	-662783	21.9658	75.6605	3.444	58.5647	0.279136	14.0638	1.7866	0.00352198	8.49018	0.40417	2.20734	5.04561	6.89088	0.20556	2.05853	31.7
2000	1063	53.7297	147.049	-659300	21.8589	75.2564	3.447	58.5894	0.280426	14.0318	1.79183	0.00354006	8.50602	0.406245	2.18629	5.02137	6.90747	0.206479	2.06909	31.4
2000	1062	53.4566	146.293	-655852	21.753	74.8563	3.45	58.614	0.281716	13.9999	1.79705	0.00355815	8.52181	0.408321	2.1654	4.99727	6.92398	0.207398	2.07967	31.2
2000	1061	53.1861	145.544	-652438	21.6481	74.4602	3.452	58.6384	0.283007	13.9678	1.80228	0.00357624	8.53754	0.410397	2.14468	4.97332	6.9404	0.208315	2.09024	30.9
2000	1060	52.9183	144.803	-649057	21.5442	74.0681	3.454	58.6628	0.284298	13.9357	1.80751	0.00359434	8.55321	0.412474	2.12411	4.94949	6.95673	0.209231	2.10082	30.7
2000	1059	52.653	144.068	-645709	21.4413	73.6798	3.457	58.687	0.285589	13.9036	1.81275	0.00361245	8.56882	0.414553	2.10371	4.92581	6.97298	0.210147	2.11141	30.4
2000	1058	52.3902	143.341	-642393	21.3393	73.2954	3.459	58.7112	0.286881	13.8714	1.81799	0.00363057	8.58438	0.416632	2.08347	4.90225	6.98915	0.211061	2.12199	30.2
2000	1057	52.13	142.62	-639108	21.2383	72.9147	3.462	58.7352	0.288173	13.8392	1.82324	0.00364869	8.59987	0.418712	2.06338	4.87883	7.00524	0.211974	2.13259	29.9
2000	1056	51.8722	141.906	-635855	21.1382	72.5377	3.464	58.7591	0.289465	13.8069	1.82849	0.00366683	8.61531	0.420793	2.04344	4.85555	7.02124	0.212886	2.14319	29.7
2000	1055	51.6168	141.199	-632633	21.039	72.1643	3.466	58.7828	0.290758	13.7746	1.83374	0.00368497	8.63069	0.422875	2.02366	4.83239	7.03716	0.213797	2.15379	29.5
2000	1054	51.3637	140.498	-629441	20.9407	71.7945	3.469	58.8065	0.292051	13.7423	1.839	0.00370312	8.64601	0.424958	2.00403	4.80936	7.053	0.214707	2.1644	29.2
2000	1053	51.1131	139.804	-626279	20.8433	71.4282	3.471	58.8301	0.293345	13.7099	1.84427	0.00372129	8.66127	0.427042	1.98455	4.78647	7.06876	0.215616	2.17502	29
2000	1052	50.8647	139.116	-623147	20.7468	71.0654	3.473	58.8535	0.294639	13.6774	1.84953	0.00373946	8.67647	0.429127	1.96522	4.7637	7.08444	0.216524	2.18564	28.8
2000	1051	50.6186	138.434	-620043	20.6511	70.7061	3.475	58.8769	0.295933	13.645	1.85481	0.00375764	8.69162	0.431214	1.94604	4.74106	7.10004	0.217431	2.19626	28.5
2000	1050	50.3747	137.758	-616968	20.5562	70.3501	3.477	58.9001	0.297228	13.6124	1.86008	0.00377583	8.70671	0.433301	1.92701	4.71855	7.11557	0.218336	2.2069	28.3
2000	1049	50.1331	137.089	-613921	20.4622	69.9974	3.479	58.9232	0.298524	13.5799	1.86537	0.00379403	8.72175	0.43539	1.90812	4.69616	7.13101	0.219241	2.21753	28
2000	1048	49.8936	136.425	-610901	20.3691	69.6479	3.481	58.9462	0.299819	13.5473	1.87065	0.00381224	8.73672	0.43748	1.88938	4.6739	7.14638	0.220145	2.22818	27.8
2000	1047	49.6562	135.767	-607909	20.2767	69.3017	3.484	58.9691	0.301116	13.5147	1.87595	0.00383046	8.75164	0.439571	1.87077	4.65176	7.16167	0.221048	2.23883	27.6
2000	1046	49.421	135.115	-604944	20.1851	68.9587	3.486	58.992	0.302413	13.482	1.88124	0.00384869	8.7665	0.441663	1.85231	4.62974	7.17689	0.22195	2.24948	27.3
2000	1045	49.1879	134.469	-602005	20.0943	68.6188	3.488	59.0146	0.303711	13.4493	1.88654	0.00386694	8.78131	0.443756	1.834	4.60785	7.19203	0.222851	2.26015	27.1
2000	1044	48.9567	133.828	-599093	20.0043	68.282	3.49	59.0372	0.305009	13.4165	1.89185	0.00388519	8.79606	0.445851	1.81581	4.58607	7.2071	0.223751	2.27082	26.9
2000	1043	48.7277	133.193	-596206	19.9151	67.9482	3.491	59.0597	0.306308	13.3838	1.89716	0.00390346	8.81075	0.447947	1.79777	4.56442	7.22209	0.22465	2.28149	26.7
2000	1042	48.5006	132.563	-593345	19.8266	67.6174	3.493	59.0821	0.307607	13.351	1.90248	0.00392174	8.82538	0.450045	1.77987	4.54289	7.23701	0.225547	2.29218	26.4
2000	1041	48.2754	131.939	-590508	19.7388	67.2895	3.495	59.1044	0.308907	13.3181	1.9078	0.00394003	8.83996	0.452144	1.7621	4.52147	7.25185	0.226444	2.30287	26.2
2000	1040	48.0522	131.32	-587697	19.6518	66.9646	3.497	59.1266	0.310208	13.2852	1.91313	0.00395833	8.85448	0.454244	1.74446	4.50017	7.26663	0.22734	2.31356	26
2000	1039	47.8309	130.706	-584909	19.5655	66.6425	3.499	59.1487	0.31151	13.2523	1.91846	0.00397664	8.86894	0.456346	1.72696	4.47899	7.28133	0.228235	2.32427	25.8
2000	1038	47.6115	130.098	-582146	19.4799	66.3233	3.501	59.1706	0.312812	13.2194	1.9238	0.00399497	8.88335	0.458449	1.70959	4.45792	7.29596	0.22913	2.33498	25.5
2000	1037	47.3939	129.494	-579406	19.395	66.0068	3.502	59.1925	0.314115	13.1864	1.92914	0.00401331	8.8977	0.460553	1.69235	4.43697	7.31052	0.230023	2.3457	25.3
2000	1036	47.1782	128.896	-576689	19.3108	65.6931	3.504	59.2143	0.315418	13.1534	1.93449	0.00403166	8.91199	0.462659	1.67524	4.41613	7.325	0.230915	2.35642	25.1
2000	1035	46.9642	128.303	-573996	19.2273	65.3821	3.506	59.236	0.316723	13.1203	1.93985	0.00405002	8.92623	0.464767	1.65825	4.39541	7.33942	0.231806	2.36716	24.9
2000	1034	46.7521	127.714	-571325	19.1444	65.0737	3.508	59.2576	0.318028	13.0873	1.94521	0.0040684	8.9404	0.466876	1.6414	4.3748	7.35377	0.232696	2.3779	24.6
2000	1033	46.5417	127.13	-568676	19.0623	64.768	3.509	59.2791	0.319334	13.0542	1.95057	0.0040868	8.95452	0.468987	1.62467	4.35429	7.36806	0.233586	2.38865	24.4
2000	1032	46.333	126.551	-566050	18.9808	64.4649	3.511	59.3005	0.320641	13.021	1.95594	0.0041052	8.96859	0.471099	1.60807	4.3339	7.38227	0.234474	2.39941	24.2
2000	1031	46.126	125.977	-563445	18.8999	64.1643	3.512	59.3217	0.321948	12.9879	1.96132	0.00412362	8.98259	0.473213	1.59159	4.31362	7.39642	0.235362	2.41017	24
2000	1030	45.9207	125.407	-560862	18.8196	63.8663	3.514	59.3429	0.323257	12.9547	1.9667	0.00414206	8.99654	0.475328	1.57524	4.29345	7.4105	0.236248	2.42095	23.8
2000	1029	45.7171	124.842	-558300	18.74	63.5708	3.515	59.3641	0.324566	12.9215	1.97208	0.00416051	9.01043	0.477445	1.559	4.27339	7.42451	0.237134	2.43173	23.6
2000	1028	45.5151	124.282	-555759	18.661	63.2777	3.517	59.3851	0.325876	12.8883	1.97748	0.00417897	9.02426	0.479564	1.54289	4.25343	7.43846	0.238019	2.44252	23.3
2000	1027	45.3148	123.726	-553239	18.5827	62.987	3.518	59.406	0.327187	12.855	1.98287	0.00419745	9.03803	0.481685	1.5269	4.23358	7.45235	0.238902	2.45332	23.1
2000	1026	45.1152	123.172	-550733	18.5047	62.6978	3.52	59.4275	0.328428	12.8217	1.98818	0.00410739	9.05117	0.483815	1.511	4.21382	7.46627	0.239789	2.46417	22.9
2000	1025	44.9162	122.62	-548240	18.4271	62.4094	3.522	59.45	0.329556	12.7885	1.99334	0.00386826	9.06337	0.485959	1.49518	4.19413	7.48028	0.240681	2.47509	22.7
2000	1024	44.7187	122.073	-545766	18.35	62.1232	3.523	59.4725	0.330669	12.7553	1.9985	0.00363199	9.07544	0.488106	1.47947	4.17455	7.49424	0.241572	2.48603	22.5
2000	1023	44.5226	121.529	-543311	18.2735	61.8393	3.525	59.495	0.33177	12.722	2.00365	0.0033988	9.08739	0.490255	1.46389	4.15507	7.50814	0.242462	2.49697	22.3
2000	1022	44.328	120.99	-540875	18.1976	61.5576	3.526	59.5175	0.33286	12.6887	2.00879	0.003169	9.09923	0.492407	1.44842	4.13569	7.52199	0.243352	2.50794	22.1
2000	1021	44.1348	120.454	-538458	18.1222	61.278	3.528	59.5399	0.333937	12.6554	2.01393	0.00294296	9.11094	0.494562	1.43306	4.11641	7.53579	0.244241	2.51891	21.9
2000	1020	43.9431	119.923	-536060	18.0473	61.0006	3.529	59.5623	0.335001	12.622	2.01907	0.00272106	9.12254	0.49672	1.41783	4.09723	7.54953	0.245131	2.5299	21.7
2000	1019	43.7528	119.395	-533679	17.973	60.7253	3.531	59.5847	0.33605	12.5887	2.0242	0.00250373	9.13401	0.498881	1.4027	4.07815	7.56322	0.246019	2.54091	21.5
2000	1018	43.5638	118.871	-531317	17.8993	60.4521	3.532	59.6071	0.337084	12.5553	2.02932	0.00229141	9.14535	0.501045	1.38769	4.05917	7.57687	0.246907	2.55193	21.3
2000	1017	43.3762	118.351	-528972	17.826	60.181	3.533	59.6295	0.338102	12.5218	2.03443	0.00208457	9.15656	0.503212	1.3728	4.04029	7.59046	0.247795	2.56297	21.1
2000	1016	43.19	117.835	-526644	17.7533	59.9118	3.535	59.6518	0.339102	12.4884	2.03954	0.0018837	9.16764	0.505382	1.35802	4.0215	7.604	0.248683	2.57402	20.9
2000	1015	43.005	117.322	-524334	17.681	59.6447	3.536	59.6742	0.340084	12.4549	2.04464	0.00168934	9.17858	0.507555	1.34334	4.00281	7.6175	0.24957	2.58509	20.7
2000	1014	42.8214	116.813	-522041	17.6093	59.3794	3.538	59.6966	0.341045	12.4214	2.04973	0.00150205	9.18937	0.509732	1.32878	3.98421	7.63095	0.250457	2.59618	20.5
2000	1013	42.639	116.307	-519764	17.5381	59.1162	3.539	59.719	0.341986	12.3879	2.05481	0.00132242	9.20001	0.511913	1.31433	3.96571	7.64435	0.251343	2.60728	20.3
2000	1012	42.4578	115.805	-517504	17.4673	58.8548	3.54	59.7415	0.342904	12.3544	2.05988	0.00115108	9.21051	0.514096	1.29999	3.9473	7.65771	0.25223	2.6184	20.1
2000	1011	42.2779	115.306	-515260	17.3971	58.5952	3.542	59.7639	0.343798	12.3208	2.06494	0.000988669	9.22084	0.516284	1.28576	3.92898	7.67103	0.253116	2.62955	19.9
2000	1010	42.0993	114.811	-513032	17.3273	58.3375	3.543	59.7864	0.344666	12.2872	2.06998	0.000835872	9.23101	0.518475	1.27164	3.91076	7.6843	0.254002	2.64071	19.7
2000	1009	41.9217	114.319	-510819	17.2579	58.0816	3.544	59.8089	0.345506	12.2536	2.07501	0.000693397	9.24101	0.520671	1.25763	3.89263	7.69754	0.254888	2.65189	19.5
2000	1008	41.7454	113.83	-508622	17.1891	57.8274	3.545	59.8315	0.346316	12.22	2.08003	0.00056198	9.25082	0.52287	1.24372	3.87459	7.71073	0.255774	2.66309	19.3
2000	1007	41.5702	113.345	-506440	17.1206	57.575	3.547	59.8542	0.347092	12.1863	2.08502	0.000442381	9.26044	0.525074	1.22992	3.85664	7.72389	0.256659	2.67432	19.1
2000	1006	41.3961	112.862	-504273	17.0526	57.3242	3.548	59.877	0.34783	12.1526	2.09	0.000335384	9.26985	0.527283	1.21623	3.83877	7.73702	0.257546	2.68556	19
2000	1005	41.223	112.383	-502120	16.985	57.0751	3.549	59.8998	0.348526	12.1189	2.09495	0.000241789	9.27903	0.529496	1.20264	3.821	7.75012	0.258432	2.69684	18.8
2000	1004	41.051	111.906	-499982	16.9179	56.8275	3.55	59.9228	0.34917	12.0852	2.09987	0.000162408	9.28794	0.531715	1.18916	3.80331	7.76319	0.259319	2.70814	18.6
2000	1003	40.8799	111.432	-497856	16.8511	56.5813	3.551	59.9461	0.349748	12.0514	2.10475	9.8054e-05	9.29652	0.533941	1.17578	3.7857	7.77625	0.260207	2.71948	18.4
2000	1002	40.7095	110.96	-495743	16.7847	56.3364	3.553	59.9698	0.350231	12.0176	2.10956	4.95147e-05	9.30462	0.536175	1.16251	3.76818	7.78932	0.261097	2.73086	18.2
2000	1001	40.5395	110.49	-493638	16.7184	56.092	3.554	59.9942	0.350536	11.9838	2.11424	1.74911e-05	9.31186	0.538424	1.14935	3.75073	7.80246	0.261991	2.74231	18
2000	1000	40.3773	110.039	-491598	16.6544	55.8584	3.555	60.0117	0.352099	11.95	2.11997	0	9.32508	0.540587	1.13625	3.73352	7.81461	0.262845	2.75332	17.8
2000	999	40.1821	109.508	-489318	16.5818	55.5809	3.558	60.0649	0.347103	11.9162	2.12026	0	9.30709	0.543213	1.12348	3.71562	7.83151	0.263903	2.7667	17.7
2000	998	39.9794	108.96	-486990	16.5074	55.2938	3.562	60.1277	0.340402	11.8824	2.11904	0	9.28054	0.545967	1.11091	3.69764	7.84962	0.265016	2.78073	17.6
2000	997	39.7787	108.417	-484684	16.4337	55.0095	3.566	60.1903	0.333795	11.8486	2.11781	0	9.254	0.548721	1.09846	3.67977	7.86765	0.266126	2.79475	17.5
2000	996	39.58	107.879	-482401	16.3606	54.7281	3.57	60.2527	0.32728	11.8148	2.11657	0	9.22747	0.551476	1.08614	3.66203	7.88558	0.267235	2.80879	17.3
2000	995	39.3832	107.347	-480140	16.2882	54.4494	3.574	60.3149	0.320855	11.7809	2.11531	0	9.20095	0.554232	1.07396	3.6444	7.90341	0.268341	2.82282	17.2
2000	994	39.1883	106.82	-477901	16.2165	54.1735	3.578	60.3769	0.314521	11.7469	2.11405	0	9.17443	0.556989	1.06189	3.62689	7.92116	0.269446	2.83686	17.1
2000	993	38.9952	106.297	-475683	16.1455	53.9003	3.582	60.4386	0.308275	11.7129	2.11277	0	9.14791	0.559746	1.04996	3.60949	7.93881	0.270548	2.85091	17
2000	992	38.804	105.779	-473485	16.0751	53.6297	3.586	60.5002	0.302118	11.6789	2.11148	0	9.12139	0.562505	1.03814	3.59221	7.95638	0.271649	2.86496	16.9
2000	991	38.6145	105.267	-471309	16.0053	53.3617	3.59	60.5617	0.296046	11.6449	2.11017	0	9.09487	0.565264	1.02645	3.57504	7.97385	0.272748	2.87901	16.7
2000	990	38.4269	104.758	-469152	15.9361	53.0962	3.594	60.6229	0.290061	11.6108	2.10885	0	9.06835	0.568025	1.01487	3.55798	7.99124	0.273845	2.89307	16.6
2000	989	38.241	104.255	-467016	15.8676	52.8333	3.597	60.6839	0.28416	11.5767	2.10752	0	9.04181	0.570786	1.00342	3.54104	8.00854	0.274939	2.90714	16.5
2000	988	38.0568	103.756	-464899	15.7997	52.5729	3.601	60.7448	0.278343	11.5426	2.10617	0	9.01527	0.573549	0.992085	3.5242	8.02576	0.276032	2.92121	16.4
2000	987	37.8743	103.262	-462802	15.7323	52.3149	3.605	60.8055	0.272609	11.5084	2.10481	0	8.98872	0.576313	0.980865	3.50747	8.04289	0.277124	2.93528	16.3
2000	986	37.6935	102.772	-460724	15.6656	52.0593	3.608	60.8661	0.266957	11.4742	2.10343	0	8.96215	0.579077	0.969759	3.49085	8.05994	0.278213	2.94937	16.2
2000	985	37.5143	102.287	-458665	15.5994	51.8061	3.612	60.9264	0.261386	11.44	2.10203	0	8.93557	0.581843	0.958768	3.47433	8.0769	0.2793	2.96345	16.1
2000	984	37.3367	101.806	-456624	15.5338	51.5552	3.616	60.9867	0.255895	11.4057	2.10062	0	8.90897	0.584611	0.947888	3.45792	8.09379	0.280386	2.97755	15.9
2000	983	37.1607	101.329	-454602	15.4688	51.3067	3.619	61.0467	0.250483	11.3714	2.09919	0	8.88236	0.587379	0.93712	3.44161	8.11059	0.28147	2.99165	15.8
2000	982	36.9863	100.856	-452597	15.4043	51.0604	3.622	61.1066	0.245149	11.3371	2.09774	0	8.85572	0.590149	0.926462	3.42541	8.12731	0.282552	3.00576	15.7
2000	981	36.8134	100.387	-450611	15.3404	50.8163	3.626	61.1664	0.239893	11.3028	2.09628	0	8.82905	0.59292	0.915912	3.40931	8.14396	0.283632	3.01987	15.6
2000	980	36.6421	99.923	-448642	15.277	50.5744	3.629	61.226	0.234714	11.2684	2.0948	0	8.80237	0.595693	0.90547	3.3933	8.16052	0.284711	3.03399	15.5
2000	979	36.4723	99.4625	-446690	15.2141	50.3347	3.633	61.2855	0.229611	11.2341	2.09329	0	8.77565	0.598467	0.895134	3.3774	8.17701	0.285788	3.04812	15.4
2000	978	36.3039	99.006	-444755	15.1518	50.0971	3.636	61.3448	0.224583	11.1997	2.09177	0	8.7489	0.601242	0.884903	3.3616	8.19343	0.286863	3.06225	15.3
2000	977	36.137	98.5534	-442837	15.0899	49.8616	3.639	61.404	0.219629	11.1652	2.09022	0	8.72212	0.604019	0.874777	3.34589	8.20976	0.287936	3.0764	15.2
2000	976	35.9715	98.1047	-440936	15.0286	49.6282	3.642	61.4631	0.214748	11.1308	2.08866	0	8.69531	0.606797	0.864753	3.33028	8.22603	0.289007	3.09055	15.1
2000	975	35.8075	97.6597	-439051	14.9678	49.3968	3.645	61.522	0.209941	11.0963	2.08707	0	8.66846	0.609577	0.854832	3.31476	8.24222	0.290077	3.10471	15
2000	974	35.6448	97.2185	-437182	14.9075	49.1675	3.649	61.5809	0.205205	11.0618	2.08547	0	8.64157	0.612359	0.845012	3.29934	8.25834	0.291145	3.11887	14.8
2000	973	35.4836	96.781	-435329	14.8477	48.9401	3.652	61.6396	0.200541	11.0273	2.08383	0	8.61464	0.615142	0.835291	3.28401	8.27438	0.292212	3.13305	14.7
2000	972	35.3236	96.3471	-433491	14.7884	48.7147	3.655	61.6982	0.195947	10.9928	2.08218	0	8.58766	0.617927	0.825669	3.26878	8.29036	0.293277	3.14723	14.6
2000	971	35.1651	95.9169	-431670	14.7295	48.4912	3.658	61.7566	0.191424	10.9583	2.0805	0	8.56064	0.620713	0.816146	3.25364	8.30626	0.29434	3.16143	14.5
2000	970	35.0078	95.4901	-429863	14.6711	48.2696	3.661	61.815	0.186969	10.9237	2.0788	0	8.53357	0.623502	0.806719	3.23858	8.3221	0.295401	3.17563	14.4
2000	969	34.8518	95.0668	-428072	14.6132	48.0499	3.664	61.8733	0.182583	10.8891	2.07707	0	8.50645	0.626292	0.797389	3.22362	8.33787	0.296461	3.18984	14.3
2000	968	34.6972	94.647	-426295	14.5557	47.832	3.667	61.9314	0.178265	10.8546	2.07532	0	8.47928	0.629084	0.788153	3.20875	8.35357	0.297519	3.20406	14.2
2000	967	34.5438	94.2306	-424533	14.4987	47.6159	3.669	61.9895	0.174014	10.82	2.07354	0	8.45205	0.631877	0.779012	3.19396	8.3692	0.298576	3.21829	14.1
2000	966	34.3916	93.8175	-422786	14.4421	47.4017	3.672	62.0475	0.16983	10.7853	2.07173	0	8.42477	0.634673	0.769965	3.17926	8.38477	0.29963	3.23253	14
2000	965	34.2407	93.4078	-421053	14.386	47.1892	3.675	62.1054	0.165712	10.7507	2.06989	0	8.39742	0.637471	0.761009	3.16464	8.40027	0.300684	3.24678	13.9
2000	964	34.091	93.0013	-419334	14.3303	46.9785	3.678	62.1632	0.161659	10.7161	2.06803	0	8.37002	0.64027	0.752146	3.15012	8.41571	0.301735	3.26103	13.8
2000	963	33.9079	92.5138	-417290	14.264	46.7214	3.683	62.2444	0.159274	10.68	2.06279	0	8.3229	0.638426	0.735091	3.1398	8.43561	0.303041	3.27864	13.6
2000	962	33.7503	92.0886	-415514	14.2062	46.5003	3.686	62.3136	0.156098	10.6428	2.05929	0	8.28641	0.638227	0.725148	3.12891	8.4514	0.304155	3.29395	13.5
2000	961	33.594	91.6668	-413753	14.1488	46.281	3.69	62.3826	0.152974	10.6057	2.05576	0	8.2499	0.638015	0.715306	3.11809	8.46715	0.305269	3.30928	13.4
2000	960	33.439	91.2484	-412007	14.0919	46.0636	3.694	62.4516	0.149902	10.5685	2.05219	0	8.21336	0.63779	0.705564	3.10733	8.48285	0.306382	3.32462	13.3
2000	959	33.2852	90.8335	-410275	14.0355	45.848	3.697	62.5204	0.146881	10.5313	2.04858	0	8.17679	0.637553	0.695922	3.09663	8.49851	0.307493	3.33997	13.2
2000	958	33.1327	90.422	-408557	13.9794	45.6342	3.701	62.5891	0.14391	10.4941	2.04494	0	8.14019	0.637303	0.686379	3.086	8.51412	0.308604	3.35535	13.1
2000	957	32.9815	90.0138	-406853	13.9239	45.4223	3.705	62.6577	0.140989	10.457	2.04126	0	8.10357	0.63704	0.676934	3.07543	8.52969	0.309713	3.37073	13
2000	956	32.8315	89.6088	-405163	13.8687	45.212	3.708	62.7261	0.138117	10.4198	2.03755	0	8.06692	0.636765	0.667587	3.06492	8.54522	0.310821	3.38613	12.9
2000	955	32.6827	89.2072	-403487	13.814	45.0036	3.712	62.7945	0.135294	10.3827	2.03381	0	8.03025	0.636479	0.658337	3.05448	8.5607	0.311929	3.40155	12.8
2000	954	32.5351	88.8088	-401825	13.7597	44.7968	3.715	62.8627	0.132518	10.3456	2.03002	0	7.99357	0.63618	0.649184	3.0441	8.57613	0.313035	3.41698	12.6
2000	953	32.3887	88.4135	-400176	13.7058	44.5918	3.718	62.9308	0.129789	10.3085	2.02621	0	7.95686	0.635869	0.640127	3.03379	8.59152	0.31414	3.43242	12.5
2000	952	32.2435	88.0215	-398540	13.6524	44.3884	3.722	62.9988	0.127108	10.2714	2.02235	0	7.92013	0.635547	0.631165	3.02353	8.60687	0.315243	3.44788	12.4
2000	951	32.0994	87.6325	-396918	13.5993	44.1868	3.725	63.0667	0.124472	10.2343	2.01847	0	7.88339	0.635213	0.622298	3.01334	8.62217	0.316346	3.46336	12.3
2000	950	31.9565	87.2467	-395308	13.5467	43.9868	3.728	63.1344	0.121881	10.1972	2.01454	0	7.84663	0.634868	0.613525	3.00321	8.63742	0.317447	3.47884	12.2
2000	949	31.8148	86.8639	-393712	13.4944	43.7884	3.732	63.2021	0.119335	10.1601	2.01059	0	7.80986	0.634512	0.604846	2.99314	8.65264	0.318547	3.49434	12.1
2000	948	31.6742	86.4841	-392128	13.4426	43.5916	3.735	63.2696	0.116834	10.123	2.00659	0	7.77307	0.634144	0.59626	2.98313	8.6678	0.319646	3.50986	12
2000	947	31.5347	86.1074	-390556	13.3911	43.3964	3.738	63.337	0.114376	10.086	2.00257	0	7.73628	0.633766	0.587767	2.97318	8.68293	0.320744	3.52538	11.9
2000	946	31.3963	85.7335	-388998	13.3401	43.2029	3.741	63.4043	0.11196	10.0489	1.99851	0	7.69947	0.633378	0.579365	2.9633	8.69801	0.32184	3.54092	11.8
2000	945	31.259	85.3627	-387451	13.2894	43.0109	3.744	63.4715	0.109588	10.0119	1.99441	0	7.66266	0.632979	0.571055	2.95347	8.71304	0.322935	3.55648	11.7
2000	944	31.1227	84.9947	-385917	13.2391	42.8204	3.747	63.5385	0.107257	9.97487	1.99028	0	7.62584	0.632569	0.562835	2.94371	8.72803	0.324029	3.57204	11.6
2000	943	30.9876	84.6296	-384395	13.1892	42.6315	3.75	63.6055	0.104968	9.93785	1.98612	0	7.58901	0.63215	0.554706	2.934	8.74298	0.325122	3.58762	11.5
2000	942	30.8535	84.2674	-382885	13.1396	42.4441	3.753	63.6723	0.102719	9.90084	1.98192	0	7.55218	0.63172	0.546666	2.92436	8.75788	0.326213	3.60321	11.4
2000	941	30.7205	83.9079	-381386	13.0905	42.2582	3.756	63.739	0.10051	9.86384	1.97769	0	7.51535	0.631281	0.538715	2.91477	8.77273	0.327302	3.61881	11.3
2000	940	30.5885	83.5513	-379900	13.0417	42.0737	3.759	63.8056	0.098341	9.82684	1.97342	0	7.47852	0.630832	0.530853	2.90524	8.78755	0.328391	3.63443	11.2
2000	939	30.4576	83.1974	-378425	12.9932	41.8908	3.761	63.872	0.096211	9.78986	1.96913	0	7.44168	0.630374	0.523078	2.89578	8.80231	0.329478	3.65005	11.1
2000	938	30.3276	82.8462	-376961	12.9451	41.7093	3.764	63.9384	0.0941196	9.75288	1.96479	0	7.40486	0.629906	0.515391	2.88637	8.81704	0.330563	3.66569	11
2000	937	30.1987	82.4978	-375509	12.8974	41.5293	3.767	64.0046	0.0920661	9.71592	1.96043	0	7.36803	0.629429	0.50779	2.87702	8.83172	0.331647	3.68134	10.9
2000	936	30.0708	82.152	-374068	12.85	41.3507	3.77	64.0707	0.0900501	9.67896	1.95603	0	7.33121	0.628943	0.500276	2.86773	8.84635	0.33273	3.697	10.8
2000	935	29.9439	81.8089	-372639	12.803	41.1735	3.772	64.1367	0.088071	9.64201	1.9516	0	7.2944	0.628449	0.492846	2.85849	8.86094	0.333811	3.71267	10.7
2000	934	29.818	81.4684	-371220	12.7563	40.9977	3.775	64.2026	0.0861283	9.60507	1.94714	0	7.2576	0.627946	0.485502	2.84932	8.87548	0.33489	3.72835	10.7
2000	933	29.693	81.1305	-369812	12.71	40.8233	3.778	64.2683	0.0842215	9.56815	1.94264	0	7.2208	0.627434	0.478242	2.8402	8.88998	0.335969	3.74404	10.6
2000	932	29.5698	80.7973	-368424	12.6643	40.6512	3.78	64.3336	0.0822701	9.5325	1.93816	0	7.18463	0.62719	0.470801	2.8295	8.90472	0.337044	3.75964	10.5
2000	931	29.4469	80.4648	-367039	12.6187	40.4796	3.783	64.399	0.0804205	9.49583	1.9336	0	7.14796	0.626711	0.463662	2.8202	8.91918	0.338119	3.77533	10.4
2000	930	29.3249	80.1349	-365665	12.5735	40.3094	3.785	64.4643	0.0786054	9.45917	1.92902	0	7.11131	0.626226	0.456606	2.81095	8.93359	0.339192	3.79103	10.3
2000	929	29.2039	79.8074	-364301	12.5285	40.1405	3.788	64.5295	0.0768243	9.42252	1.9244	0	7.07467	0.625733	0.449631	2.80175	8.94796	0.340264	3.80675	10.2
2000	928	29.0838	79.4824	-362948	12.4839	39.973	3.79	64.5946	0.0750767	9.38588	1.91975	0	7.03806	0.625233	0.442738	2.79261	8.96229	0.341334	3.82247	10.1
2000	927	28.9646	79.1599	-361605	12.4396	39.8067	3.792	64.6595	0.0733621	9.34926	1.91508	0	7.00146	0.624727	0.435926	2.78352	8.97657	0.342402	3.8382	10
2000	926	28.8463	78.8398	-360272	12.3956	39.6417	3.795	64.7243	0.0716801	9.31265	1.91037	0	6.96489	0.624215	0.429193	2.77447	8.99081	0.343469	3.85394	9.9
2000	925	28.7289	78.5221	-358949	12.352	39.4781	3.797	64.789	0.07003	9.27605	1.90562	0	6.92834	0.623697	0.422539	2.76548	9.00501	0.344534	3.86969	9.8
2000	924	28.6124	78.2068	-357636	12.3086	39.3156	3.799	64.8536	0.0684114	9.23947	1.90085	0	6.89182	0.623173	0.415964	2.75654	9.01915	0.345597	3.88544	9.7
2000	923	28.4968	77.8938	-356333	12.2656	39.1545	3.801	64.918	0.0668239	9.2029	1.89605	0	6.85532	0.622643	0.409467	2.74765	9.03326	0.346659	3.9012	9.6
2000	922	28.3821	77.5832	-355040	12.2229	38.9946	3.803	64.9823	0.0652669	9.16635	1.89122	0	6.81886	0.622108	0.403047	2.7388	9.04732	0.347719	3.91697	9.5
2000	921	28.2682	77.2749	-353757	12.1805	38.8359	3.806	65.0465	0.06374	9.12982	1.88636	0	6.78242	0.621568	0.396704	2.73001	9.06133	0.348777	3.93275	9.4
2000	920	28.1552	76.9689	-352483	12.1383	38.6784	3.808	65.1106	0.0622428	9.0933	1.88147	0	6.74602	0.621024	0.390436	2.72125	9.0753	0.349833	3.94853	9.4
2000	919	28.0431	76.6651	-351219	12.0965	38.5222	3.81	65.1745	0.0607747	9.0568	1.87655	0	6.70965	0.620475	0.384244	2.71255	9.08923	0.350887	3.96432	9.3
2000	918	27.9318	76.3637	-349964	12.055	38.3671	3.812	65.2383	0.0593352	9.02032	1.87161	0	6.67332	0.619922	0.378127	2.70389	9.10311	0.35194	3.98012	9.2
2000	917	27.8213	76.0644	-348719	12.0138	38.2132	3.814	65.302	0.0579241	8.98386	1.86663	0	6.63703	0.619365	0.372084	2.69527	9.11695	0.35299	3.99592	9.1
2000	916	27.7117	75.7674	-347483	11.9729	38.0605	3.816	65.3655	0.0565407	8.94741	1.86163	0	6.60077	0.618804	0.366114	2.6867	9.13074	0.354039	4.01173	9
2000	915	27.6029	75.4725	-346256	11.9323	37.909	3.818	65.4289	0.0551848	8.91098	1.8566	0	6.56456	0.61824	0.360216	2.67817	9.14449	0.355086	4.02754	8.9
2000	914	27.4949	75.1798	-345039	11.8919	37.7586	3.819	65.4922	0.0538558	8.87458	1.85154	0	6.52839	0.617672	0.354391	2.66969	9.15819	0.35613	4.04336	8.8
2000	913	27.3877	74.8893	-343830	11.8519	37.6094	3.821	65.5553	0.0525533	8.83819	1.84645	0	6.49227	0.617102	0.348638	2.66125	9.17185	0.357173	4.05918	8.7
2000	912	27.2814	74.601	-342631	11.8121	37.4613	3.823	65.6184	0.0512769	8.80183	1.84134	0	6.45619	0.616528	0.342955	2.65284	9.18546	0.358214	4.07501	8.7
2000	911	27.1758	74.3147	-341440	11.7726	37.3143	3.825	65.6812	0.0500262	8.76548	1.8362	0	6.42017	0.615953	0.337342	2.64448	9.19903	0.359253	4.09084	8.6
2000	910	27.071	74.0305	-340258	11.7334	37.1685	3.826	65.744	0.0488007	8.72916	1.83103	0	6.38419	0.615375	0.331799	2.63616	9.21255	0.36029	4.10667	8.5
2000	909	26.967	73.7484	-339085	11.6944	37.0237	3.828	65.8066	0.0476002	8.69286	1.82584	0	6.34826	0.614795	0.326325	2.62788	9.22603	0.361324	4.12251	8.4
2000	908	26.8638	73.4684	-337920	11.6558	36.8801	3.83	65.869	0.0464241	8.65658	1.82062	0	6.31239	0.614213	0.32092	2.61964	9.23946	0.362357	4.13835	8.3
2000	907	26.7613	73.1904	-336764	11.6174	36.7375	3.831	65.9314	0.0452721	8.62033	1.81537	0	6.27657	0.61363	0.315582	2.61144	9.25285	0.363387	4.15419	8.2
2000	906	26.6596	72.9145	-335617	11.5793	36.596	3.833	65.9936	0.0441437	8.5841	1.81011	0	6.24081	0.613045	0.310311	2.60327	9.26619	0.364416	4.17004	8.1
2000	905	26.5587	72.6405	-334478	11.5414	36.4555	3.834	66.0556	0.0430387	8.54789	1.80481	0	6.20511	0.612459	0.305107	2.59514	9.27949	0.365442	4.18589	8.1
2000	904	26.4585	72.3686	-333347	11.5038	36.3162	3.836	66.1175	0.0419566	8.51171	1.79949	0	6.16947	0.611872	0.299969	2.58705	9.29274	0.366466	4.20174	8
2000	903	26.3591	72.0986	-332225	11.4665	36.1778	3.837	66.1793	0.0408971	8.47556	1.79415	0	6.13389	0.611285	0.294896	2.579	9.30595	0.367488	4.21759	7.9
2000	902	26.2604	71.8306	-331111	11.4294	36.0405	3.839	66.2409	0.0398597	8.43943	1.78879	0	6.09837	0.610697	0.289887	2.57098	9.31911	0.368507	4.23344	7.8
2000	901	26.1624	71.5645	-330005	11.3926	35.9043	3.84	66.3024	0.0388442	8.40332	1.7834	0	6.06292	0.610109	0.284943	2.56299	9.33223	0.369524	4.24929	7.7
2000	900	26.0652	71.3003	-328907	11.3561	35.769	3.841	66.3638	0.0378501	8.36725	1.77798	0	6.02753	0.609521	0.280062	2.55504	9.3453	0.370539	4.26514	7.6
clinopyroxene_1	thermodynamic	data	and	composition:
Pressure	Temperature	mass	S	H	V	Cp	structure	formula	SiO2	TiO2	Al2O3	Fe2O3	Cr2O3	FeO	MnO	MgO	CaO	Na2O	K2O	H2O
2000	1151	0.063715	0.151423	-791.711	0.019599	0.078093	cpx	Na0.01Ca0.27Fe''0.36Mg1.28Fe'''0.02Ti0.00Al0.14Si1.92O6	53.1694	0.0301013	3.17573	0.897024	0	11.972	0	23.738	6.92032	0.0974021	0	0
2000	1150	0.272225	0.64666	-3381.01	0.083713	0.333536	cpx	Na0.01Ca0.27Fe''0.36Mg1.28Fe'''0.02Ti0.00Al0.14Si1.92O6	53.1527	0.0304852	3.17406	0.900443	0	12.0338	0	23.6936	6.91724	0.0977742	0	0
2000	1149	0.265779	0.631052	-3299.38	0.081707	0.325521	cpx	Na0.01Ca0.27Fe''0.37Mg1.28Fe'''0.02Ti0.00Al0.14Si1.92O6	53.1359	0.0308705	3.17239	0.903862	0	12.0956	0	23.6492	6.91401	0.0981446	0	0
2000	1148	0.261007	0.619429	-3238.58	0.080217	0.319561	cpx	Na0.01Ca0.27Fe''0.37Mg1.27Fe'''0.02Ti0.00Al0.14Si1.92O6	53.1191	0.031257	3.17071	0.907278	0	12.1576	0	23.6048	6.91063	0.0985133	0	0
2000	1147	0.256362	0.60812	-3179.41	0.078767	0.313761	cpx	Na0.01Ca0.27Fe''0.37Mg1.27Fe'''0.02Ti0.00Al0.14Si1.92O6	53.1024	0.0316448	3.16902	0.910691	0	12.2198	0	23.5605	6.90708	0.0988802	0	0
2000	1146	0.251841	0.597113	-3121.83	0.077356	0.308116	cpx	Na0.01Ca0.27Fe''0.37Mg1.27Fe'''0.02Ti0.00Al0.14Si1.92O6	53.0856	0.0320339	3.16732	0.914101	0	12.2821	0	23.5162	6.90338	0.0992453	0	0
2000	1145	0.247438	0.586398	-3065.77	0.075982	0.30262	cpx	Na0.01Ca0.27Fe''0.37Mg1.27Fe'''0.03Ti0.00Al0.14Si1.92O6	53.0688	0.0324243	3.16561	0.917509	0	12.3445	0	23.472	6.89953	0.0996087	0	0
2000	1144	0.24315	0.575964	-3011.17	0.074644	0.297268	cpx	Na0.01Ca0.27Fe''0.38Mg1.27Fe'''0.03Ti0.00Al0.14Si1.92O6	53.052	0.032816	3.1639	0.920916	0	12.4071	0	23.4277	6.89553	0.0999704	0	0
2000	1143	0.238972	0.5658	-2957.99	0.07334	0.292054	cpx	Na0.01Ca0.27Fe''0.38Mg1.26Fe'''0.03Ti0.00Al0.14Si1.92O6	53.0352	0.0332089	3.16217	0.92432	0	12.4698	0	23.3835	6.89137	0.10033	0	0
2000	1142	0.234901	0.555898	-2906.18	0.07207	0.286975	cpx	Na0.01Ca0.27Fe''0.38Mg1.26Fe'''0.03Ti0.00Al0.14Si1.92O6	53.0184	0.033603	3.16044	0.927723	0	12.5327	0	23.3393	6.88706	0.100688	0	0
2000	1141	0.230932	0.546248	-2855.68	0.070832	0.282024	cpx	Na0.01Ca0.27Fe''0.38Mg1.26Fe'''0.03Ti0.00Al0.14Si1.92O6	53.0016	0.0339983	3.1587	0.931125	0	12.5958	0	23.2951	6.8826	0.101045	0	0
2000	1140	0.227063	0.536842	-2806.45	0.069625	0.277199	cpx	Na0.01Ca0.27Fe''0.38Mg1.26Fe'''0.03Ti0.00Al0.13Si1.92O6	52.9848	0.0343948	3.15695	0.934526	0	12.659	0	23.251	6.87799	0.1014	0	0
2000	1139	0.22329	0.527671	-2758.46	0.068448	0.272493	cpx	Na0.01Ca0.27Fe''0.39Mg1.26Fe'''0.03Ti0.00Al0.13Si1.92O6	52.9679	0.0347926	3.15519	0.937926	0	12.7223	0	23.2068	6.87323	0.101753	0	0
2000	1138	0.21961	0.518727	-2711.65	0.067301	0.267904	cpx	Na0.01Ca0.27Fe''0.39Mg1.25Fe'''0.03Ti0.00Al0.13Si1.92O6	52.9511	0.0351914	3.15343	0.941326	0	12.7859	0	23.1627	6.86833	0.102104	0	0
2000	1137	0.216019	0.510003	-2665.98	0.066181	0.263428	cpx	Na0.01Ca0.27Fe''0.39Mg1.25Fe'''0.03Ti0.00Al0.13Si1.92O6	52.9342	0.0355915	3.15165	0.944725	0	12.8496	0	23.1186	6.86328	0.102453	0	0
2000	1136	0.212514	0.501492	-2621.43	0.065089	0.25906	cpx	Na0.01Ca0.27Fe''0.39Mg1.25Fe'''0.03Ti0.00Al0.13Si1.92O6	52.9173	0.0359927	3.14987	0.948124	0	12.9134	0	23.0744	6.85809	0.102801	0	0
2000	1135	0.209094	0.493185	-2577.95	0.064022	0.254798	cpx	Na0.01Ca0.27Fe''0.39Mg1.25Fe'''0.03Ti0.00Al0.13Si1.92O6	52.9003	0.036395	3.14808	0.951524	0	12.9775	0	23.0303	6.85275	0.103147	0	0
2000	1134	0.205754	0.485077	-2535.5	0.062981	0.250636	cpx	Na0.01Ca0.27Fe''0.40Mg1.25Fe'''0.03Ti0.00Al0.13Si1.92O6	52.8834	0.0367984	3.14629	0.954923	0	13.0417	0	22.9861	6.84727	0.103492	0	0
2000	1133	0.202493	0.477161	-2494.06	0.061965	0.246574	cpx	Na0.01Ca0.27Fe''0.40Mg1.24Fe'''0.03Ti0.00Al0.13Si1.92O6	52.8664	0.037203	3.14448	0.958324	0	13.1061	0	22.942	6.84165	0.103835	0	0
2000	1132	0.199308	0.469432	-2453.59	0.060972	0.242606	cpx	Na0.01Ca0.27Fe''0.40Mg1.24Fe'''0.03Ti0.00Al0.13Si1.92O6	52.8494	0.0376086	3.14267	0.961726	0	13.1707	0	22.8978	6.83589	0.104175	0	0
2000	1131	0.196196	0.461882	-2414.06	0.060003	0.238731	cpx	Na0.01Ca0.27Fe''0.40Mg1.24Fe'''0.03Ti0.00Al0.13Si1.92O6	52.8324	0.0380153	3.14085	0.965128	0	13.2354	0	22.8537	6.82998	0.104515	0	0
2000	1130	0.193156	0.454507	-2375.44	0.059056	0.234945	cpx	Na0.01Ca0.27Fe''0.40Mg1.24Fe'''0.03Ti0.00Al0.13Si1.92O6	52.8154	0.0384231	3.13902	0.968532	0	13.3004	0	22.8095	6.82394	0.104852	0	0
2000	1129	0.190184	0.4473	-2337.7	0.05813	0.231246	cpx	Na0.01Ca0.27Fe''0.41Mg1.24Fe'''0.03Ti0.00Al0.13Si1.92O6	52.7983	0.0388319	3.13718	0.971938	0	13.3655	0	22.7653	6.81776	0.105188	0	0
2000	1128	0.18728	0.440257	-2300.82	0.057225	0.22763	cpx	Na0.01Ca0.27Fe''0.41Mg1.23Fe'''0.03Ti0.00Al0.13Si1.92O6	52.7813	0.0392417	3.13534	0.975346	0	13.4308	0	22.721	6.81145	0.105522	0	0
2000	1127	0.18444	0.433373	-2264.77	0.056341	0.224095	cpx	Na0.01Ca0.27Fe''0.41Mg1.23Fe'''0.03Ti0.00Al0.13Si1.92O6	52.7641	0.0396526	3.13349	0.978756	0	13.4963	0	22.6768	6.80499	0.105854	0	0
2000	1126	0.181662	0.426643	-2229.51	0.055476	0.22064	cpx	Na0.01Ca0.27Fe''0.41Mg1.23Fe'''0.03Ti0.00Al0.13Si1.92O6	52.747	0.0400645	3.13163	0.982168	0	13.5621	0	22.6325	6.79841	0.106185	0	0
2000	1125	0.178946	0.420061	-2195.04	0.05463	0.21726	cpx	Na0.01Ca0.27Fe''0.42Mg1.23Fe'''0.03Ti0.00Al0.13Si1.92O6	52.7298	0.0404773	3.12977	0.985583	0	13.628	0	22.5882	6.79169	0.106514	0	0
2000	1124	0.176289	0.413625	-2161.32	0.053803	0.213955	cpx	Na0.01Ca0.27Fe''0.42Mg1.23Fe'''0.03Ti0.00Al0.13Si1.92O6	52.7126	0.0408912	3.12789	0.989	0	13.6941	0	22.5438	6.78483	0.106841	0	0
2000	1123	0.173689	0.407329	-2128.34	0.052994	0.210721	cpx	Na0.01Ca0.26Fe''0.42Mg1.22Fe'''0.03Ti0.00Al0.13Si1.92O6	52.6954	0.041306	3.12601	0.992421	0	13.7604	0	22.4994	6.77785	0.107167	0	0
2000	1122	0.171145	0.401168	-2096.07	0.052202	0.207557	cpx	Na0.01Ca0.26Fe''0.42Mg1.22Fe'''0.03Ti0.00Al0.13Si1.92O6	52.6781	0.0417218	3.12413	0.995846	0	13.8269	0	22.455	6.77073	0.10749	0	0
2000	1121	0.168655	0.395141	-2064.48	0.051427	0.204461	cpx	Na0.01Ca0.26Fe''0.42Mg1.22Fe'''0.03Ti0.00Al0.13Si1.92O6	52.6608	0.0421385	3.12223	0.999274	0	13.8937	0	22.4105	6.76348	0.107812	0	0
2000	1120	0.166217	0.389241	-2033.57	0.050668	0.201431	cpx	Na0.01Ca0.26Fe''0.43Mg1.22Fe'''0.03Ti0.00Al0.13Si1.92O6	52.6435	0.0425562	3.12033	1.00271	0	13.9606	0	22.366	6.75611	0.108132	0	0
2000	1119	0.163831	0.383466	-2003.31	0.049925	0.198464	cpx	Na0.01Ca0.26Fe''0.43Mg1.22Fe'''0.03Ti0.00Al0.13Si1.92O6	52.6261	0.0429748	3.11843	1.00614	0	14.0278	0	22.3215	6.7486	0.108451	0	0
2000	1118	0.161494	0.377813	-1973.68	0.049198	0.19556	cpx	Na0.01Ca0.26Fe''0.43Mg1.21Fe'''0.03Ti0.00Al0.13Si1.92O6	52.6087	0.0433942	3.11651	1.00958	0	14.0952	0	22.2769	6.74097	0.108768	0	0
2000	1117	0.159205	0.372277	-1944.66	0.048486	0.192716	cpx	Na0.01Ca0.26Fe''0.43Mg1.21Fe'''0.03Ti0.00Al0.13Si1.92O6	52.5912	0.0438146	3.11459	1.01303	0	14.1628	0	22.2322	6.73321	0.109083	0	0
2000	1116	0.156962	0.366855	-1916.25	0.047789	0.18993	cpx	Na0.01Ca0.26Fe''0.43Mg1.21Fe'''0.03Ti0.00Al0.13Si1.92O6	52.5738	0.0442359	3.11266	1.01648	0	14.2306	0	22.1875	6.72533	0.109396	0	0
2000	1115	0.154766	0.361544	-1888.41	0.047106	0.187201	cpx	Na0.01Ca0.26Fe''0.44Mg1.21Fe'''0.03Ti0.00Al0.13Si1.92O6	52.5562	0.044658	3.11073	1.01993	0	14.2987	0	22.1427	6.71732	0.109707	0	0
2000	1114	0.152613	0.356342	-1861.14	0.046436	0.184528	cpx	Na0.01Ca0.26Fe''0.44Mg1.20Fe'''0.03Ti0.00Al0.13Si1.92O6	52.5387	0.045081	3.10879	1.02339	0	14.367	0	22.0979	6.70919	0.110017	0	0
2000	1113	0.150503	0.351245	-1834.41	0.04578	0.181908	cpx	Na0.01Ca0.26Fe''0.44Mg1.20Fe'''0.03Ti0.00Al0.13Si1.92O6	52.5211	0.0455049	3.10684	1.02686	0	14.4355	0	22.053	6.70094	0.110325	0	0
2000	1112	0.148436	0.34625	-1808.22	0.045137	0.179341	cpx	Na0.01Ca0.26Fe''0.44Mg1.20Fe'''0.03Ti0.00Al0.13Si1.92O6	52.5034	0.0459295	3.10489	1.03033	0	14.5043	0	22.008	6.69256	0.110631	0	0
2000	1111	0.146409	0.341355	-1782.55	0.044507	0.176824	cpx	Na0.01Ca0.26Fe''0.45Mg1.20Fe'''0.03Ti0.00Al0.13Si1.92O6	52.4857	0.046355	3.10293	1.03381	0	14.5733	0	21.9629	6.68406	0.110936	0	0
2000	1110	0.144421	0.336556	-1757.39	0.043889	0.174358	cpx	Na0.01Ca0.26Fe''0.45Mg1.20Fe'''0.03Ti0.00Al0.13Si1.92O6	52.468	0.0467813	3.10097	1.03729	0	14.6425	0	21.9178	6.67545	0.111238	0	0
2000	1109	0.142473	0.331852	-1732.72	0.043284	0.171939	cpx	Na0.01Ca0.26Fe''0.45Mg1.19Fe'''0.03Ti0.00Al0.13Si1.92O6	52.4502	0.0472085	3.099	1.04078	0	14.712	0	21.8726	6.66671	0.111539	0	0
2000	1108	0.140561	0.327239	-1708.52	0.04269	0.169568	cpx	Na0.01Ca0.26Fe''0.45Mg1.19Fe'''0.03Ti0.00Al0.13Si1.92O6	52.4323	0.0476364	3.09702	1.04428	0	14.7817	0	21.8274	6.65786	0.111838	0	0
2000	1107	0.138687	0.322716	-1684.8	0.042107	0.167242	cpx	Na0.01Ca0.26Fe''0.46Mg1.19Fe'''0.03Ti0.00Al0.13Si1.92O6	52.4145	0.048065	3.09504	1.04779	0	14.8516	0	21.782	6.64889	0.112136	0	0
2000	1106	0.136848	0.31828	-1661.52	0.041536	0.164961	cpx	Na0.01Ca0.26Fe''0.46Mg1.19Fe'''0.03Ti0.00Al0.13Si1.92O6	52.3965	0.0484945	3.09305	1.0513	0	14.9218	0	21.7366	6.6398	0.112431	0	0
2000	1105	0.135044	0.313928	-1638.7	0.040975	0.162723	cpx	Na0.01Ca0.26Fe''0.46Mg1.19Fe'''0.03Ti0.00Al0.13Si1.92O6	52.3785	0.0489247	3.09106	1.05482	0	14.9923	0	21.691	6.63059	0.112725	0	0
2000	1104	0.133273	0.30966	-1616.3	0.040426	0.160528	cpx	Na0.01Ca0.26Fe''0.46Mg1.18Fe'''0.03Ti0.00Al0.13Si1.92O6	52.3605	0.0493556	3.08906	1.05835	0	15.063	0	21.6454	6.62128	0.113017	0	0
2000	1103	0.131536	0.305472	-1594.32	0.039886	0.158374	cpx	Na0.01Ca0.26Fe''0.46Mg1.18Fe'''0.03Ti0.00Al0.13Si1.92O6	52.3424	0.0497873	3.08705	1.06189	0	15.134	0	21.5997	6.61184	0.113307	0	0
2000	1102	0.129831	0.301362	-1572.75	0.039356	0.15626	cpx	Na0.01Ca0.26Fe''0.47Mg1.18Fe'''0.03Ti0.00Al0.13Si1.92O6	52.3243	0.0502197	3.08504	1.06543	0	15.2052	0	21.5539	6.6023	0.113595	0	0
2000	1101	0.128157	0.297329	-1551.59	0.038837	0.154185	cpx	Na0.01Ca0.26Fe''0.47Mg1.18Fe'''0.03Ti0.00Al0.13Si1.92O6	52.3061	0.0506528	3.08303	1.06899	0	15.2767	0	21.508	6.59264	0.113882	0	0
2000	1100	0.126513	0.29337	-1530.81	0.038326	0.152149	cpx	Na0.01Ca0.26Fe''0.47Mg1.18Fe'''0.03Ti0.00Al0.13Si1.92O6	52.2878	0.0510866	3.081	1.07255	0	15.3485	0	21.462	6.58287	0.114166	0	0
2000	1099	0.1249	0.289484	-1510.41	0.037825	0.150149	cpx	Na0.01Ca0.26Fe''0.47Mg1.17Fe'''0.03Ti0.00Al0.13Si1.92O6	52.2695	0.0515211	3.07898	1.07613	0	15.4205	0	21.4159	6.57299	0.114449	0	0
2000	1098	0.123316	0.28567	-1490.38	0.037334	0.148186	cpx	Na0.01Ca0.26Fe''0.48Mg1.17Fe'''0.03Ti0.00Al0.13Si1.92O6	52.2511	0.0519562	3.07695	1.07971	0	15.4928	0	21.3697	6.56301	0.11473	0	0
2000	1097	0.12176	0.281924	-1470.72	0.036851	0.146259	cpx	Na0.01Ca0.26Fe''0.48Mg1.17Fe'''0.03Ti0.00Al0.13Si1.92O6	52.2327	0.0523921	3.07491	1.0833	0	15.5654	0	21.3234	6.55291	0.115009	0	0
2000	1096	0.120231	0.278246	-1451.4	0.036376	0.144366	cpx	Na0.01Ca0.26Fe''0.48Mg1.17Fe'''0.03Ti0.00Al0.13Si1.92O6	52.2142	0.0528286	3.07287	1.08691	0	15.6382	0	21.277	6.5427	0.115287	0	0
2000	1095	0.11873	0.274634	-1432.44	0.03591	0.142507	cpx	Na0.01Ca0.26Fe''0.48Mg1.16Fe'''0.03Ti0.00Al0.13Si1.92O6	52.1957	0.0532657	3.07082	1.09052	0	15.7113	0	21.2304	6.53239	0.115562	0	0
2000	1094	0.117255	0.271087	-1413.8	0.035453	0.140681	cpx	Na0.01Ca0.26Fe''0.49Mg1.16Fe'''0.03Ti0.00Al0.13Si1.92O6	52.1771	0.0537035	3.06877	1.09414	0	15.7848	0	21.1837	6.52197	0.115836	0	0
2000	1093	0.115806	0.267602	-1395.5	0.035003	0.138887	cpx	Na0.01Ca0.26Fe''0.49Mg1.16Fe'''0.03Ti0.00Al0.13Si1.92O6	52.1584	0.0541419	3.06672	1.09778	0	15.8584	0	21.137	6.51145	0.116107	0	0
2000	1092	0.114383	0.264179	-1377.52	0.034562	0.137125	cpx	Na0.01Ca0.26Fe''0.49Mg1.16Fe'''0.03Ti0.00Al0.13Si1.92O6	52.1397	0.0545809	3.06465	1.10143	0	15.9324	0	21.0901	6.50082	0.116377	0	0
2000	1091	0.112983	0.260815	-1359.85	0.034128	0.135393	cpx	Na0.01Ca0.26Fe''0.49Mg1.16Fe'''0.03Ti0.00Al0.13Si1.92O6	52.1209	0.0550206	3.06259	1.10509	0	16.0067	0	21.043	6.49009	0.116645	0	0
2000	1090	0.111608	0.257511	-1342.48	0.033701	0.133691	cpx	Na0.01Ca0.26Fe''0.50Mg1.15Fe'''0.03Ti0.00Al0.13Si1.92O6	52.102	0.0554608	3.06052	1.10876	0	16.0812	0	20.9959	6.47925	0.116911	0	0
2000	1089	0.110257	0.254263	-1325.42	0.033282	0.132019	cpx	Na0.01Ca0.26Fe''0.50Mg1.15Fe'''0.03Ti0.00Al0.13Si1.92O6	52.0831	0.0559016	3.05845	1.11244	0	16.1561	0	20.9486	6.46831	0.117175	0	0
2000	1088	0.108928	0.251072	-1308.64	0.03287	0.130375	cpx	Na0.01Ca0.26Fe''0.50Mg1.15Fe'''0.03Ti0.00Al0.13Si1.92O6	52.0641	0.056343	3.05637	1.11614	0	16.2312	0	20.9011	6.45727	0.117437	0	0
2000	1087	0.107622	0.247935	-1292.16	0.032465	0.128759	cpx	Na0.01Ca0.25Fe''0.50Mg1.15Fe'''0.03Ti0.00Al0.13Si1.92O6	52.045	0.056785	3.05429	1.11985	0	16.3067	0	20.8536	6.44613	0.117698	0	0
2000	1086	0.106337	0.244851	-1275.95	0.032067	0.127171	cpx	Na0.01Ca0.25Fe''0.51Mg1.15Fe'''0.03Ti0.00Al0.13Si1.92O6	52.0259	0.0572275	3.0522	1.12357	0	16.3824	0	20.8059	6.43489	0.117956	0	0
2000	1085	0.105075	0.24182	-1260.01	0.031675	0.125609	cpx	Na0.01Ca0.25Fe''0.51Mg1.14Fe'''0.03Ti0.00Al0.13Si1.92O6	52.0066	0.0576706	3.05011	1.12731	0	16.4585	0	20.758	6.42355	0.118212	0	0
2000	1084	0.103833	0.23884	-1244.34	0.03129	0.124074	cpx	Na0.01Ca0.25Fe''0.51Mg1.14Fe'''0.03Ti0.00Al0.13Si1.92O6	51.9874	0.0581142	3.04801	1.13106	0	16.5348	0	20.71	6.41211	0.118467	0	0
2000	1083	0.102611	0.235909	-1228.93	0.030912	0.122564	cpx	Na0.01Ca0.25Fe''0.51Mg1.14Fe'''0.03Ti0.00Al0.13Si1.92O6	51.968	0.0585584	3.04591	1.13482	0	16.6115	0	20.6619	6.40058	0.11872	0	0
2000	1082	0.10141	0.233028	-1213.78	0.030539	0.121079	cpx	Na0.01Ca0.25Fe''0.52Mg1.14Fe'''0.03Ti0.00Al0.13Si1.92O6	51.9486	0.0590031	3.04381	1.1386	0	16.6885	0	20.6136	6.38894	0.11897	0	0
2000	1081	0.100229	0.230194	-1198.88	0.030173	0.119618	cpx	Na0.01Ca0.25Fe''0.52Mg1.13Fe'''0.03Ti0.00Al0.13Si1.92O6	51.9291	0.0594483	3.0417	1.1424	0	16.7658	0	20.5652	6.37722	0.119219	0	0
2000	1080	0.099066	0.227407	-1184.22	0.029813	0.118182	cpx	Na0.01Ca0.25Fe''0.52Mg1.13Fe'''0.03Ti0.00Al0.13Si1.92O6	51.9095	0.059894	3.03959	1.1462	0	16.8434	0	20.5166	6.36539	0.119466	0	0
2000	1079	0.097923	0.224666	-1169.8	0.029459	0.116769	cpx	Na0.01Ca0.25Fe''0.52Mg1.13Fe'''0.03Ti0.00Al0.13Si1.92O6	51.8898	0.0603402	3.03748	1.15003	0	16.9213	0	20.4678	6.35347	0.11971	0	0
2000	1078	0.096797	0.22197	-1155.61	0.02911	0.115379	cpx	Na0.01Ca0.25Fe''0.53Mg1.13Fe'''0.03Ti0.00Al0.13Si1.92O6	51.8701	0.0607869	3.03536	1.15387	0	16.9996	0	20.4189	6.34146	0.119953	0	0
2000	1077	0.09569	0.219317	-1141.65	0.028767	0.114011	cpx	Na0.01Ca0.25Fe''0.53Mg1.12Fe'''0.03Ti0.00Al0.13Si1.92O6	51.8502	0.0612341	3.03324	1.15773	0	17.0782	0	20.3698	6.32936	0.120194	0	0
2000	1076	0.094601	0.216708	-1127.92	0.02843	0.112666	cpx	Na0.01Ca0.25Fe''0.53Mg1.12Fe'''0.03Ti0.00Al0.13Si1.92O6	51.8303	0.0616817	3.03111	1.1616	0	17.1571	0	20.3206	6.31716	0.120433	0	0
2000	1075	0.093528	0.21414	-1114.4	0.028098	0.111341	cpx	Na0.01Ca0.25Fe''0.53Mg1.12Fe'''0.03Ti0.00Al0.13Si1.92O6	51.8104	0.0621299	3.02898	1.16549	0	17.2364	0	20.2711	6.30487	0.120669	0	0
2000	1074	0.092473	0.211613	-1101.1	0.027771	0.110038	cpx	Na0.01Ca0.25Fe''0.54Mg1.12Fe'''0.03Ti0.00Al0.13Si1.92O6	51.7903	0.0625784	3.02685	1.1694	0	17.3159	0	20.2215	6.29249	0.120904	0	0
2000	1073	0.091434	0.209127	-1088.01	0.027449	0.108756	cpx	Na0.01Ca0.25Fe''0.54Mg1.12Fe'''0.03Ti0.00Al0.13Si1.92O6	51.7701	0.0630275	3.02471	1.17333	0	17.3959	0	20.1718	6.28002	0.121137	0	0
2000	1072	0.090412	0.20668	-1075.13	0.027133	0.107494	cpx	Na0.01Ca0.25Fe''0.54Mg1.11Fe'''0.03Ti0.00Al0.13Si1.92O6	51.7499	0.0634769	3.02257	1.17727	0	17.4761	0	20.1218	6.26746	0.121367	0	0
2000	1071	0.089405	0.204272	-1062.45	0.026821	0.106251	cpx	Na0.01Ca0.25Fe''0.54Mg1.11Fe'''0.03Ti0.00Al0.13Si1.92O6	51.7296	0.0639269	3.02043	1.18123	0	17.5567	0	20.0717	6.25481	0.121596	0	0
2000	1070	0.088414	0.201902	-1049.96	0.026515	0.105028	cpx	Na0.01Ca0.25Fe''0.55Mg1.11Fe'''0.03Ti0.00Al0.13Si1.92O6	51.7092	0.0643772	3.01828	1.18521	0	17.6377	0	20.0214	6.24208	0.121823	0	0
2000	1069	0.087439	0.199568	-1037.67	0.026213	0.103824	cpx	Na0.01Ca0.25Fe''0.55Mg1.11Fe'''0.03Ti0.00Al0.13Si1.92O6	51.6887	0.064828	3.01614	1.18921	0	17.719	0	19.9709	6.22925	0.122047	0	0
2000	1068	0.086478	0.197271	-1025.57	0.025915	0.102639	cpx	Na0.01Ca0.25Fe''0.55Mg1.10Fe'''0.03Ti0.00Al0.13Si1.92O6	51.6681	0.0652791	3.01398	1.19323	0	17.8006	0	19.9202	6.21635	0.12227	0	0
2000	1067	0.085532	0.19501	-1013.65	0.025622	0.101472	cpx	Na0.01Ca0.25Fe''0.56Mg1.10Fe'''0.03Ti0.00Al0.13Si1.92O6	51.6474	0.0657307	3.01183	1.19727	0	17.8826	0	19.8693	6.20335	0.12249	0	0
2000	1066	0.0846	0.192784	-1001.92	0.025334	0.100322	cpx	Na0.01Ca0.25Fe''0.56Mg1.10Fe'''0.03Ti0.00Al0.13Si1.92O6	51.6266	0.0661827	3.00967	1.20133	0	17.965	0	19.8182	6.19027	0.122708	0	0
2000	1065	0.083682	0.190592	-990.369	0.02505	0.099191	cpx	Na0.01Ca0.25Fe''0.56Mg1.10Fe'''0.03Ti0.00Al0.13Si1.92O6	51.6057	0.0666351	3.00751	1.20541	0	18.0477	0	19.767	6.17711	0.122924	0	0
2000	1064	0.082779	0.188433	-978.99	0.024771	0.098076	cpx	Na0.01Ca0.25Fe''0.56Mg1.09Fe'''0.03Ti0.00Al0.13Si1.92O6	51.5848	0.0670878	3.00534	1.20951	0	18.1308	0	19.7155	6.16386	0.123138	0	0
2000	1063	0.081889	0.186307	-967.783	0.024495	0.096978	cpx	Na0.01Ca0.25Fe''0.57Mg1.09Fe'''0.03Ti0.00Al0.13Si1.92O6	51.5637	0.067541	3.00317	1.21364	0	18.2143	0	19.6638	6.15053	0.12335	0	0
2000	1062	0.081012	0.184214	-956.745	0.024224	0.095897	cpx	Na0.01Ca0.24Fe''0.57Mg1.09Fe'''0.03Ti0.00Al0.13Si1.92O6	51.5426	0.0679945	3.001	1.21778	0	18.2981	0	19.6119	6.13711	0.12356	0	0
2000	1061	0.080148	0.182152	-945.872	0.023957	0.094832	cpx	Na0.01Ca0.24Fe''0.57Mg1.09Fe'''0.03Ti0.00Al0.13Si1.92O6	51.5213	0.0684484	2.99883	1.22195	0	18.3823	0	19.5598	6.12362	0.123768	0	0
2000	1060	0.079297	0.180121	-935.162	0.023694	0.093783	cpx	Na0.01Ca0.24Fe''0.58Mg1.08Fe'''0.03Ti0.00Al0.13Si1.92O6	51.5	0.0689026	2.99665	1.22614	0	18.4669	0	19.5075	6.11005	0.123973	0	0
2000	1059	0.078459	0.178121	-924.61	0.023434	0.09275	cpx	Na0.01Ca0.24Fe''0.58Mg1.08Fe'''0.03Ti0.00Al0.13Si1.92O6	51.4785	0.0693573	2.99447	1.23035	0	18.5518	0	19.455	6.09639	0.124177	0	0
2000	1058	0.077632	0.17615	-914.215	0.023179	0.091732	cpx	Na0.01Ca0.24Fe''0.58Mg1.08Fe'''0.03Ti0.00Al0.13Si1.92O6	51.457	0.0698122	2.99229	1.23459	0	18.6371	0	19.4022	6.08266	0.124378	0	0
2000	1057	0.076819	0.174209	-903.972	0.022927	0.090729	cpx	Na0.01Ca0.24Fe''0.58Mg1.08Fe'''0.03Ti0.00Al0.13Si1.92O6	51.4353	0.0702675	2.9901	1.23885	0	18.7228	0	19.3492	6.06884	0.124577	0	0
2000	1056	0.076016	0.172297	-893.88	0.022679	0.089741	cpx	Na0.01Ca0.24Fe''0.59Mg1.07Fe'''0.03Ti0.00Al0.13Si1.92O6	51.4135	0.0707232	2.98791	1.24313	0	18.8089	0	19.296	6.05495	0.124774	0	0
2000	1055	0.075226	0.170413	-883.935	0.022435	0.088767	cpx	Na0.01Ca0.24Fe''0.59Mg1.07Fe'''0.04Ti0.00Al0.13Si1.92O6	51.3917	0.0711792	2.98572	1.24744	0	18.8954	0	19.2426	6.04098	0.124968	0	0
2000	1054	0.074447	0.168557	-874.136	0.022194	0.087807	cpx	Na0.01Ca0.24Fe''0.59Mg1.07Fe'''0.04Ti0.00Al0.13Si1.92O6	51.3697	0.0716355	2.98353	1.25177	0	18.9823	0	19.189	6.02694	0.125161	0	0
2000	1053	0.073679	0.166727	-864.478	0.021957	0.086862	cpx	Na0.01Ca0.24Fe''0.60Mg1.07Fe'''0.04Ti0.00Al0.13Si1.92O6	51.3476	0.0720921	2.98133	1.25613	0	19.0696	0	19.1351	6.01282	0.125351	0	0
2000	1052	0.072923	0.164925	-854.959	0.021723	0.08593	cpx	Na0.01Ca0.24Fe''0.60Mg1.06Fe'''0.04Ti0.00Al0.13Si1.92O6	51.3254	0.0725491	2.97913	1.26052	0	19.1572	0	19.081	5.99862	0.125539	0	0
2000	1051	0.072177	0.163149	-845.578	0.021493	0.085011	cpx	Na0.01Ca0.24Fe''0.60Mg1.06Fe'''0.04Ti0.00Al0.13Si1.92O6	51.3031	0.0730064	2.97692	1.26493	0	19.2453	0	19.0266	5.98435	0.125725	0	0
2000	1050	0.071442	0.161398	-836.331	0.021266	0.084106	cpx	Na0.01Ca0.24Fe''0.61Mg1.06Fe'''0.04Ti0.00Al0.13Si1.92O6	51.2807	0.073464	2.97472	1.26937	0	19.3338	0	18.972	5.97001	0.125908	0	0
2000	1049	0.070717	0.159673	-827.217	0.021042	0.083213	cpx	Na0.01Ca0.24Fe''0.61Mg1.06Fe'''0.04Ti0.00Al0.13Si1.92O6	51.2582	0.0739219	2.97251	1.27384	0	19.4227	0	18.9172	5.95559	0.126089	0	0
2000	1048	0.070003	0.157972	-818.232	0.020821	0.082334	cpx	Na0.01Ca0.24Fe''0.61Mg1.05Fe'''0.04Ti0.00Al0.13Si1.92O6	51.2356	0.0743801	2.9703	1.27833	0	19.5119	0	18.8621	5.9411	0.126268	0	0
2000	1047	0.069298	0.156297	-809.374	0.020603	0.081467	cpx	Na0.01Ca0.24Fe''0.61Mg1.05Fe'''0.04Ti0.00Al0.13Si1.92O6	51.2128	0.0748386	2.96808	1.28286	0	19.6017	0	18.8067	5.92654	0.126445	0	0
2000	1046	0.068604	0.154644	-800.642	0.020389	0.080612	cpx	Na0.01Ca0.24Fe''0.62Mg1.05Fe'''0.04Ti0.00Al0.13Si1.92O6	51.19	0.0752974	2.96587	1.28741	0	19.6918	0	18.7511	5.91191	0.126619	0	0
2000	1045	0.067919	0.153016	-792.032	0.020177	0.079769	cpx	Na0.01Ca0.24Fe''0.62Mg1.05Fe'''0.04Ti0.00Al0.13Si1.92O6	51.167	0.0757565	2.96365	1.29199	0	19.7823	0	18.6953	5.8972	0.126791	0	0
2000	1044	0.067244	0.151411	-783.544	0.019969	0.078939	cpx	Na0.01Ca0.24Fe''0.62Mg1.04Fe'''0.04Ti0.00Al0.13Si1.92O6	51.1439	0.0762159	2.96142	1.2966	0	19.8733	0	18.6392	5.88243	0.126961	0	0
2000	1043	0.066578	0.149828	-775.174	0.019763	0.078119	cpx	Na0.01Ca0.24Fe''0.63Mg1.04Fe'''0.04Ti0.00Al0.13Si1.92O6	51.1207	0.0766756	2.9592	1.30124	0	19.9647	0	18.5828	5.86759	0.127128	0	0
2000	1042	0.065922	0.148268	-766.921	0.01956	0.077312	cpx	Na0.01Ca0.24Fe''0.63Mg1.04Fe'''0.04Ti0.00Al0.13Si1.92O6	51.0974	0.0771356	2.95697	1.30591	0	20.0565	0	18.5262	5.85268	0.127293	0	0
2000	1041	0.065275	0.146729	-758.782	0.01936	0.076515	cpx	Na0.01Ca0.23Fe''0.63Mg1.03Fe'''0.04Ti0.00Al0.13Si1.92O6	51.0739	0.0775958	2.95473	1.31062	0	20.1487	0	18.4693	5.8377	0.127456	0	0
2000	1040	0.064636	0.145213	-750.756	0.019163	0.07573	cpx	Na0.01Ca0.23Fe''0.64Mg1.03Fe'''0.04Ti0.00Al0.13Si1.92O6	51.0503	0.0780563	2.9525	1.31535	0	20.2414	0	18.4121	5.82266	0.127616	0	0
2000	1039	0.064007	0.143717	-742.841	0.018969	0.074955	cpx	Na0.01Ca0.23Fe''0.64Mg1.03Fe'''0.04Ti0.00Al0.13Si1.92O6	51.0266	0.0785171	2.95026	1.32012	0	20.3345	0	18.3546	5.80755	0.127774	0	0
2000	1038	0.063386	0.142242	-735.035	0.018777	0.074191	cpx	Na0.01Ca0.23Fe''0.64Mg1.03Fe'''0.04Ti0.00Al0.13Si1.92O6	51.0028	0.0789782	2.94802	1.32492	0	20.4281	0	18.2969	5.79237	0.127929	0	0
2000	1037	0.062774	0.140788	-727.336	0.018588	0.073438	cpx	Na0.01Ca0.23Fe''0.65Mg1.02Fe'''0.04Ti0.00Al0.13Si1.92O6	50.9789	0.0794396	2.94577	1.32976	0	20.5221	0	18.2389	5.77713	0.128083	0	0
2000	1036	0.06217	0.139354	-719.742	0.018402	0.072695	cpx	Na0.01Ca0.23Fe''0.65Mg1.02Fe'''0.04Ti0.00Al0.13Si1.92O6	50.9548	0.0799012	2.94353	1.33462	0	20.6165	0	18.1806	5.76183	0.128233	0	0
2000	1035	0.061574	0.13794	-712.252	0.018218	0.071963	cpx	Na0.01Ca0.23Fe''0.65Mg1.02Fe'''0.04Ti0.00Al0.13Si1.92O6	50.9306	0.0803631	2.94128	1.33953	0	20.7114	0	18.122	5.74646	0.128381	0	0
2000	1034	0.060986	0.136545	-704.863	0.018036	0.07124	cpx	Na0.01Ca0.23Fe''0.66Mg1.01Fe'''0.04Ti0.00Al0.13Si1.92O6	50.9062	0.0808253	2.93902	1.34446	0	20.8067	0	18.0632	5.73103	0.128527	0	0
2000	1033	0.060406	0.13517	-697.575	0.017857	0.070527	cpx	Na0.01Ca0.23Fe''0.66Mg1.01Fe'''0.04Ti0.00Al0.13Si1.92O6	50.8818	0.0812877	2.93676	1.34944	0	20.9025	0	18.004	5.71553	0.128671	0	0
2000	1032	0.059834	0.133813	-690.385	0.017681	0.069824	cpx	Na0.01Ca0.23Fe''0.66Mg1.01Fe'''0.04Ti0.00Al0.13Si1.92O6	50.8572	0.0817504	2.9345	1.35445	0	20.9988	0	17.9445	5.69998	0.128811	0	0
2000	1031	0.05927	0.132475	-683.292	0.017507	0.06913	cpx	Na0.01Ca0.23Fe''0.67Mg1.01Fe'''0.04Ti0.00Al0.13Si1.92O6	50.8324	0.0822134	2.93224	1.35949	0	21.0955	0	17.8848	5.68436	0.12895	0	0
2000	1030	0.058714	0.131155	-676.294	0.017335	0.068445	cpx	Na0.01Ca0.23Fe''0.67Mg1.00Fe'''0.04Ti0.00Al0.13Si1.92O6	50.8076	0.0826766	2.92997	1.36457	0	21.1927	0	17.8247	5.66869	0.129086	0	0
2000	1029	0.058164	0.129853	-669.389	0.017165	0.06777	cpx	Na0.01Ca0.23Fe''0.67Mg1.00Fe'''0.04Ti0.00Al0.13Si1.92O6	50.7826	0.0831401	2.92769	1.36969	0	21.2904	0	17.7644	5.65295	0.129219	0	0
2000	1028	0.057623	0.128568	-662.577	0.016998	0.067104	cpx	Na0.01Ca0.23Fe''0.68Mg1.00Fe'''0.04Ti0.00Al0.13Si1.92O6	50.7574	0.0836038	2.92542	1.37485	0	21.3885	0	17.7037	5.63716	0.12935	0	0
2000	1027	0.057088	0.127301	-655.856	0.016833	0.066447	cpx	Na0.01Ca0.23Fe''0.68Mg0.99Fe'''0.04Ti0.00Al0.13Si1.92O6	50.7321	0.0840679	2.92314	1.38005	0	21.4871	0	17.6427	5.62131	0.129478	0	0
2000	1026	0.056477	0.125865	-648.264	0.016646	0.065701	cpx	Na0.01Ca0.23Fe''0.68Mg0.99Fe'''0.04Ti0.00Al0.13Si1.92O6	50.7069	0.0845146	2.92078	1.38523	0	21.5858	0	17.5817	5.60544	0.129603	0	0
2000	1025	0.055824	0.124338	-640.214	0.016446	0.064908	cpx	Na0.01Ca0.23Fe''0.69Mg0.99Fe'''0.04Ti0.00Al0.13Si1.92O6	50.6818	0.0849333	2.9183	1.39034	0	21.6845	0	17.5208	5.58959	0.129724	0	0
2000	1024	0.055294	0.123085	-633.575	0.016283	0.064258	cpx	Na0.01Ca0.23Fe''0.69Mg0.99Fe'''0.04Ti0.00Al0.13Si1.92O6	50.6566	0.085348	2.9158	1.39548	0	21.7836	0	17.4597	5.5737	0.129842	0	0
2000	1023	0.054775	0.121858	-627.069	0.016123	0.063621	cpx	Na0.01Ca0.23Fe''0.69Mg0.98Fe'''0.04Ti0.00Al0.13Si1.92O6	50.6313	0.0857598	2.91329	1.40066	0	21.8831	0	17.3982	5.55776	0.129958	0	0
2000	1022	0.054263	0.120648	-620.656	0.015966	0.062994	cpx	Na0.01Ca0.22Fe''0.70Mg0.98Fe'''0.04Ti0.00Al0.13Si1.92O6	50.6058	0.0861683	2.91076	1.40587	0	21.9831	0	17.3364	5.54178	0.130071	0	0
2000	1021	0.053758	0.119453	-614.321	0.01581	0.062374	cpx	Na0.01Ca0.22Fe''0.70Mg0.98Fe'''0.04Ti0.00Al0.13Si1.92O6	50.5803	0.0865734	2.90822	1.41111	0	22.0835	0	17.2744	5.52576	0.130181	0	0
2000	1020	0.053258	0.118273	-608.061	0.015656	0.061761	cpx	Na0.01Ca0.22Fe''0.70Mg0.97Fe'''0.04Ti0.00Al0.13Si1.92O6	50.5546	0.0869748	2.90566	1.41638	0	22.1843	0	17.2121	5.5097	0.130289	0	0
2000	1019	0.052764	0.117107	-601.876	0.015504	0.061156	cpx	Na0.01Ca0.22Fe''0.71Mg0.97Fe'''0.04Ti0.00Al0.13Si1.92O6	50.5288	0.0873724	2.90309	1.42169	0	22.2856	0	17.1494	5.4936	0.130394	0	0
2000	1018	0.052276	0.115954	-595.763	0.015354	0.060557	cpx	Na0.01Ca0.22Fe''0.71Mg0.97Fe'''0.04Ti0.00Al0.13Si1.92O6	50.5029	0.0877658	2.9005	1.42703	0	22.3874	0	17.0865	5.47746	0.130496	0	0
2000	1017	0.051794	0.114815	-589.721	0.015205	0.059966	cpx	Na0.01Ca0.22Fe''0.71Mg0.96Fe'''0.04Ti0.00Al0.13Si1.92O6	50.4768	0.0881548	2.89789	1.4324	0	22.4895	0	17.0233	5.46129	0.130596	0	0
2000	1016	0.051317	0.113689	-583.749	0.015058	0.059381	cpx	Na0.01Ca0.22Fe''0.72Mg0.96Fe'''0.04Ti0.00Al0.13Si1.92O6	50.4507	0.088539	2.89527	1.43781	0	22.5921	0	16.9598	5.44509	0.130693	0	0
2000	1015	0.050845	0.112577	-577.845	0.014913	0.058803	cpx	Na0.01Ca0.22Fe''0.72Mg0.96Fe'''0.04Ti0.00Al0.13Si1.92O6	50.4244	0.0889182	2.89262	1.44325	0	22.6952	0	16.896	5.42886	0.130787	0	0
2000	1014	0.050379	0.111477	-572.007	0.01477	0.058232	cpx	Na0.01Ca0.22Fe''0.73Mg0.95Fe'''0.04Ti0.00Al0.13Si1.92O6	50.3981	0.089292	2.88995	1.44872	0	22.7986	0	16.8319	5.41259	0.130878	0	0
2000	1013	0.049917	0.110389	-566.234	0.014628	0.057667	cpx	Na0.01Ca0.22Fe''0.73Mg0.95Fe'''0.04Ti0.00Al0.13Si1.92O6	50.3716	0.08966	2.88726	1.45423	0	22.9025	0	16.7675	5.3963	0.130967	0	0
2000	1012	0.049461	0.109313	-560.524	0.014487	0.057107	cpx	Na0.01Ca0.22Fe''0.73Mg0.95Fe'''0.04Ti0.00Al0.13Si1.92O6	50.345	0.0900219	2.88455	1.45976	0	23.0069	0	16.7028	5.37998	0.131053	0	0
2000	1011	0.049009	0.108248	-554.874	0.014348	0.056554	cpx	Na0.01Ca0.22Fe''0.74Mg0.94Fe'''0.04Ti0.00Al0.13Si1.92O6	50.3182	0.0903772	2.88181	1.46533	0	23.1117	0	16.6378	5.36364	0.131137	0	0
2000	1010	0.048561	0.107195	-549.283	0.014211	0.056007	cpx	Na0.01Ca0.22Fe''0.74Mg0.94Fe'''0.04Ti0.00Al0.13Si1.92O6	50.2914	0.0907253	2.87905	1.47093	0	23.2169	0	16.5725	5.34728	0.131217	0	0
2000	1009	0.048118	0.106152	-543.746	0.014075	0.055465	cpx	Na0.01Ca0.22Fe''0.74Mg0.94Fe'''0.04Ti0.00Al0.13Si1.92O6	50.2645	0.0910658	2.87626	1.47656	0	23.3225	0	16.5069	5.33091	0.131295	0	0
2000	1008	0.047679	0.105118	-538.261	0.01394	0.054927	cpx	Na0.01Ca0.22Fe''0.75Mg0.93Fe'''0.04Ti0.00Al0.13Si1.92O6	50.2375	0.091398	2.87345	1.48223	0	23.4285	0	16.4411	5.31451	0.13137	0	0
2000	1007	0.047243	0.104093	-532.82	0.013806	0.054394	cpx	Na0.01Ca0.22Fe''0.75Mg0.93Fe'''0.04Ti0.00Al0.13Si1.92O6	50.2103	0.091721	2.8706	1.48792	0	23.535	0	16.3749	5.29811	0.131443	0	0
2000	1006	0.04681	0.103075	-527.416	0.013673	0.053865	cpx	Na0.01Ca0.22Fe''0.75Mg0.93Fe'''0.04Ti0.00Al0.13Si1.92O6	50.1831	0.0920337	2.86772	1.49363	0	23.6418	0	16.3085	5.2817	0.131512	0	0
2000	1005	0.046378	0.10206	-522.033	0.01354	0.053337	cpx	Na0.01Ca0.22Fe''0.76Mg0.93Fe'''0.04Ti0.00Al0.13Si1.92O6	50.1558	0.0923348	2.8648	1.49938	0	23.749	0	16.2418	5.26529	0.131579	0	0
2000	1004	0.045945	0.101044	-516.646	0.013407	0.052809	cpx	Na0.01Ca0.21Fe''0.76Mg0.92Fe'''0.04Ti0.00Al0.13Si1.92O6	50.1284	0.0926219	2.86183	1.50514	0	23.8566	0	16.1748	5.24889	0.131643	0	0
2000	1003	0.045505	0.100016	-511.2	0.013273	0.052274	cpx	Na0.01Ca0.21Fe''0.77Mg0.92Fe'''0.04Ti0.00Al0.13Si1.92O6	50.101	0.0928912	2.85881	1.5109	0	23.9645	0	16.1077	5.2325	0.131704	0	0
2000	1002	0.045048	0.098949	-505.556	0.013133	0.051718	cpx	Na0.01Ca0.21Fe''0.77Mg0.91Fe'''0.04Ti0.00Al0.13Si1.92O6	50.0736	0.0931349	2.85571	1.51666	0	24.0726	0	16.0404	5.21616	0.131762	0	0
2000	1001	0.04453	0.09775	-499.243	0.012976	0.051094	cpx	Na0.01Ca0.21Fe''0.77Mg0.91Fe'''0.04Ti0.00Al0.13Si1.92O6	50.0464	0.0933308	2.85248	1.52236	0	24.1805	0	15.9732	5.19994	0.131817	0	0
2000	1000	0.045187	0.099129	-506.073	0.013161	0.051816	cpx	Na0.01Ca0.21Fe''0.78Mg0.91Fe'''0.04Ti0.00Al0.13Si1.92O6	50.0165	0.0938587	2.8502	1.52898	0	24.2937	0	15.9022	5.18268	0.131873	0	0
2000	999	0.03956	0.086734	-442.712	0.011518	0.045343	cpx	Na0.01Ca0.21Fe''0.78Mg0.91Fe'''0.04Ti0.00Al0.13Si1.92O6	49.9993	0.0926519	2.84288	1.53112	0	24.3831	0	15.8484	5.17065	0.131906	0	0
2000	998	0.037686	0.082576	-421.434	0.010968	0.043175	cpx	Na0.01Ca0.21Fe''0.78Mg0.90Fe'''0.04Ti0.00Al0.13Si1.92O6	49.9855	0.0909892	2.83418	1.53204	0	24.4659	0	15.7994	5.16002	0.131931	0	0
2000	997	0.037243	0.081558	-416.184	0.010835	0.042648	cpx	Na0.01Ca0.21Fe''0.79Mg0.90Fe'''0.04Ti0.00Al0.13Si1.92O6	49.9716	0.0893453	2.82549	1.53296	0	24.549	0	15.7503	5.14936	0.131954	0	0
2000	996	0.036806	0.080554	-411.005	0.010705	0.042128	cpx	Na0.01Ca0.21Fe''0.79Mg0.90Fe'''0.04Ti0.00Al0.13Si1.92O6	49.9576	0.08772	2.81683	1.53389	0	24.6323	0	15.701	5.13866	0.131976	0	0
2000	995	0.036375	0.079563	-405.896	0.010575	0.041616	cpx	Na0.01Ca0.21Fe''0.79Mg0.90Fe'''0.04Ti0.00Al0.13Si1.92O6	49.9436	0.0861134	2.80817	1.53483	0	24.7157	0	15.6516	5.12794	0.131996	0	0
2000	994	0.035949	0.078586	-400.856	0.010448	0.04111	cpx	Na0.01Ca0.21Fe''0.80Mg0.89Fe'''0.04Ti0.00Al0.13Si1.92O6	49.9295	0.0845252	2.79953	1.53577	0	24.7994	0	15.6021	5.1172	0.132014	0	0
2000	993	0.035529	0.077622	-395.883	0.010322	0.040611	cpx	Na0.01Ca0.21Fe''0.80Mg0.89Fe'''0.04Ti0.00Al0.13Si1.92O6	49.9153	0.0829554	2.7909	1.53672	0	24.8833	0	15.5524	5.10642	0.13203	0	0
2000	992	0.035114	0.07667	-390.976	0.010198	0.040118	cpx	Na0.01Ca0.21Fe''0.80Mg0.89Fe'''0.04Ti0.00Al0.13Si1.92O6	49.901	0.0814038	2.78229	1.53767	0	24.9674	0	15.5026	5.09562	0.132044	0	0
2000	991	0.034704	0.075731	-386.134	0.010076	0.039632	cpx	Na0.01Ca0.21Fe''0.81Mg0.89Fe'''0.04Ti0.00Al0.13Si1.92O6	49.8866	0.0798703	2.77369	1.53863	0	25.0516	0	15.4527	5.08479	0.132057	0	0
2000	990	0.0343	0.074805	-381.355	0.009955	0.039152	cpx	Na0.01Ca0.21Fe''0.81Mg0.88Fe'''0.04Ti0.00Al0.13Si1.92O6	49.8722	0.0783548	2.7651	1.5396	0	25.1361	0	15.4026	5.07393	0.132068	0	0
2000	989	0.033901	0.07389	-376.637	0.009835	0.038679	cpx	Na0.01Ca0.21Fe''0.81Mg0.88Fe'''0.04Ti0.00Al0.12Si1.92O6	49.8577	0.0768573	2.75652	1.54057	0	25.2208	0	15.3525	5.06305	0.132077	0	0
2000	988	0.033506	0.072987	-371.981	0.009717	0.038211	cpx	Na0.01Ca0.21Fe''0.81Mg0.88Fe'''0.04Ti0.00Al0.12Si1.92O6	49.8431	0.0753775	2.74795	1.54155	0	25.3056	0	15.3021	5.05215	0.132085	0	0
2000	987	0.033117	0.072096	-367.384	0.009601	0.037749	cpx	Na0.01Ca0.21Fe''0.82Mg0.88Fe'''0.04Ti0.00Al0.12Si1.92O6	49.8285	0.0739154	2.7394	1.54253	0	25.3907	0	15.2517	5.04122	0.132091	0	0
2000	986	0.032732	0.071216	-362.845	0.009486	0.037293	cpx	Na0.01Ca0.21Fe''0.82Mg0.87Fe'''0.04Ti0.00Al0.12Si1.92O6	49.8137	0.0724709	2.73085	1.54352	0	25.4759	0	15.2011	5.03028	0.132095	0	0
2000	985	0.032352	0.070346	-358.363	0.009372	0.036843	cpx	Na0.01Ca0.21Fe''0.82Mg0.87Fe'''0.04Ti0.00Al0.12Si1.92O6	49.7989	0.0710439	2.72232	1.54451	0	25.5614	0	15.1504	5.01931	0.132097	0	0
2000	984	0.031976	0.069488	-353.937	0.00926	0.036398	cpx	Na0.01Ca0.21Fe''0.83Mg0.87Fe'''0.04Ti0.00Al0.12Si1.92O6	49.7841	0.0696342	2.71379	1.54551	0	25.647	0	15.0996	5.00832	0.132098	0	0
2000	983	0.031605	0.06864	-349.566	0.009149	0.035959	cpx	Na0.01Ca0.21Fe''0.83Mg0.87Fe'''0.04Ti0.00Al0.12Si1.92O6	49.7691	0.0682418	2.70528	1.54651	0	25.7328	0	15.0486	4.99731	0.132096	0	0
2000	982	0.031238	0.067803	-345.248	0.00904	0.035525	cpx	Na0.01Ca0.21Fe''0.83Mg0.86Fe'''0.04Ti0.00Al0.12Si1.92O6	49.7541	0.0668666	2.69677	1.54751	0	25.8188	0	14.9975	4.98629	0.132094	0	0
2000	981	0.030876	0.066976	-340.983	0.008932	0.035096	cpx	Na0.01Ca0.21Fe''0.84Mg0.86Fe'''0.04Ti0.00Al0.12Si1.92O6	49.739	0.0655084	2.68828	1.54852	0	25.905	0	14.9463	4.97524	0.132089	0	0
2000	980	0.030518	0.066159	-336.769	0.008825	0.034672	cpx	Na0.01Ca0.21Fe''0.84Mg0.86Fe'''0.05Ti0.00Al0.12Si1.92O6	49.7238	0.0641672	2.67979	1.54953	0	25.9914	0	14.895	4.96418	0.132083	0	0
2000	979	0.030163	0.065351	-332.605	0.008719	0.034253	cpx	Na0.01Ca0.20Fe''0.84Mg0.85Fe'''0.05Ti0.00Al0.12Si1.92O6	49.7086	0.0628429	2.6713	1.55055	0	26.078	0	14.8435	4.9531	0.132074	0	0
2000	978	0.029813	0.064553	-328.491	0.008615	0.033839	cpx	Na0.01Ca0.20Fe''0.85Mg0.85Fe'''0.05Ti0.00Al0.12Si1.92O6	49.6933	0.0615353	2.66283	1.55157	0	26.1647	0	14.792	4.94201	0.132065	0	0
2000	977	0.029467	0.063764	-324.425	0.008512	0.03343	cpx	Na0.01Ca0.20Fe''0.85Mg0.85Fe'''0.05Ti0.00Al0.12Si1.92O6	49.678	0.0602444	2.65436	1.55259	0	26.2516	0	14.7403	4.9309	0.132053	0	0
2000	976	0.029124	0.062985	-320.406	0.00841	0.033026	cpx	Na0.01Ca0.20Fe''0.85Mg0.85Fe'''0.05Ti0.00Al0.12Si1.92O6	49.6625	0.0589701	2.6459	1.55361	0	26.3387	0	14.6884	4.91977	0.13204	0	0
2000	975	0.028785	0.062214	-316.433	0.008309	0.032626	cpx	Na0.01Ca0.20Fe''0.85Mg0.84Fe'''0.05Ti0.00Al0.12Si1.92O6	49.647	0.0577123	2.63744	1.55463	0	26.426	0	14.6365	4.90864	0.132025	0	0
2000	974	0.02845	0.061452	-312.506	0.008209	0.03223	cpx	Na0.01Ca0.20Fe''0.86Mg0.84Fe'''0.05Ti0.00Al0.12Si1.92O6	49.6315	0.0564708	2.62899	1.55565	0	26.5134	0	14.5845	4.89749	0.132008	0	0
2000	973	0.028118	0.060698	-308.622	0.00811	0.031839	cpx	Na0.01Ca0.20Fe''0.86Mg0.84Fe'''0.05Ti0.00Al0.12Si1.92O6	49.6159	0.0552457	2.62055	1.55668	0	26.601	0	14.5323	4.88633	0.13199	0	0
2000	972	0.02779	0.059953	-304.782	0.008012	0.031452	cpx	Na0.01Ca0.20Fe''0.86Mg0.84Fe'''0.05Ti0.00Al0.12Si1.92O6	49.6002	0.0540368	2.61211	1.5577	0	26.6888	0	14.48	4.87516	0.13197	0	0
2000	971	0.027465	0.059216	-300.984	0.007916	0.031069	cpx	Na0.01Ca0.20Fe''0.87Mg0.83Fe'''0.05Ti0.00Al0.12Si1.92O6	49.5845	0.052844	2.60367	1.55873	0	26.7767	0	14.4276	4.86397	0.131948	0	0
2000	970	0.027143	0.058487	-297.227	0.00782	0.030691	cpx	Na0.01Ca0.20Fe''0.87Mg0.83Fe'''0.05Ti0.00Al0.12Si1.92O6	49.5687	0.0516672	2.59524	1.55975	0	26.8648	0	14.3751	4.85278	0.131924	0	0
2000	969	0.026825	0.057765	-293.51	0.007726	0.030316	cpx	Na0.01Ca0.20Fe''0.87Mg0.83Fe'''0.05Ti0.00Al0.12Si1.92O6	49.5529	0.0505063	2.58681	1.56077	0	26.953	0	14.3225	4.84158	0.131899	0	0
2000	968	0.02651	0.057052	-289.833	0.007632	0.029945	cpx	Na0.01Ca0.20Fe''0.88Mg0.83Fe'''0.05Ti0.00Al0.12Si1.92O6	49.537	0.0493613	2.57838	1.56179	0	27.0414	0	14.2699	4.83037	0.131872	0	0
2000	967	0.026198	0.056345	-286.195	0.007539	0.029578	cpx	Na0.01Ca0.20Fe''0.88Mg0.82Fe'''0.05Ti0.00Al0.12Si1.92O6	49.521	0.0482321	2.56996	1.56281	0	27.1299	0	14.2171	4.81916	0.131844	0	0
2000	966	0.025889	0.055646	-282.594	0.007448	0.029215	cpx	Na0.01Ca0.20Fe''0.88Mg0.82Fe'''0.05Ti0.00Al0.12Si1.92O6	49.505	0.0471185	2.56153	1.56382	0	27.2186	0	14.1642	4.80794	0.131813	0	0
2000	965	0.025583	0.054954	-279.029	0.007357	0.028855	cpx	Na0.01Ca0.20Fe''0.89Mg0.82Fe'''0.05Ti0.00Al0.12Si1.92O6	49.489	0.0460205	2.55311	1.56483	0	27.3074	0	14.1112	4.79671	0.131781	0	0
2000	964	0.025279	0.054268	-275.501	0.007267	0.028499	cpx	Na0.01Ca0.20Fe''0.89Mg0.81Fe'''0.05Ti0.00Al0.12Si1.92O6	49.4729	0.044938	2.54469	1.56584	0	27.3963	0	14.0581	4.78548	0.131748	0	0
spinel_0	thermodynamic	data	and	composition:
Pressure	Temperature	mass	S	H	V	Cp	formula	SiO2	TiO2	Al2O3	Fe2O3	Cr2O3	FeO	MnO	MgO	CaO	Na2O	K2O	H2O
2000	1026	0.000531	0.00108	-2.9246	0.000112	0.000487	Fe''1.01Mg0.17Fe'''1.11Al0.28Cr0.26Ti0.17O4	0	6.36596	6.72462	41.0868	9.22293	33.4916	0	3.10814	0	0	0	0
2000	1025	0.001861	0.003779	-10.2118	0.000391	0.001705	Fe''1.01Mg0.16Fe'''1.12Al0.28Cr0.25Ti0.18O4	0	6.53059	6.60062	41.28	8.84401	33.6733	0	3.07157	0	0	0	0
2000	1024	0.002383	0.004837	-13.0364	0.0005	0.002182	Fe''1.02Mg0.16Fe'''1.12Al0.27Cr0.24Ti0.18O4	0	6.69815	6.47794	41.4656	8.46574	33.857	0	3.03558	0	0	0	0
2000	1023	0.002418	0.004907	-13.1912	0.000508	0.002214	Fe''1.02Mg0.16Fe'''1.13Al0.27Cr0.23Ti0.19O4	0	6.86867	6.3566	41.6435	8.08819	34.0429	0	3.00018	0	0	0	0
2000	1022	0.002456	0.00498	-13.3551	0.000515	0.002247	Fe''1.03Mg0.16Fe'''1.13Al0.26Cr0.22Ti0.19O4	0	7.04207	6.23666	41.8136	7.71159	34.2307	0	2.96536	0	0	0	0
2000	1021	0.002494	0.005057	-13.5285	0.000523	0.002282	Fe''1.04Mg0.16Fe'''1.14Al0.26Cr0.21Ti0.20O4	0	7.21823	6.11817	41.9757	7.3362	34.4206	0	2.93112	0	0	0	0
2000	1020	0.002535	0.005137	-13.7118	0.000532	0.002319	Fe''1.04Mg0.16Fe'''1.14Al0.26Cr0.20Ti0.20O4	0	7.39703	6.00121	42.1297	6.96227	34.6123	0	2.89744	0	0	0	0
2000	1019	0.002578	0.005222	-13.9055	0.00054	0.002357	Fe''1.05Mg0.15Fe'''1.15Al0.25Cr0.19Ti0.21O4	0	7.57836	5.88583	42.2756	6.59003	34.8058	0	2.86433	0	0	0	0
2000	1018	0.002623	0.00531	-14.1101	0.00055	0.002398	Fe''1.06Mg0.15Fe'''1.15Al0.25Cr0.18Ti0.21O4	0	7.76207	5.77207	42.4133	6.21972	35.001	0	2.83177	0	0	0	0
2000	1017	0.00267	0.005402	-14.3261	0.000559	0.00244	Fe''1.07Mg0.15Fe'''1.16Al0.24Cr0.17Ti0.22O4	0	7.94802	5.65999	42.5429	5.85156	35.1978	0	2.79976	0	0	0	0
2000	1016	0.002719	0.005499	-14.5544	0.00057	0.002484	Fe''1.07Mg0.15Fe'''1.16Al0.24Cr0.16Ti0.22O4	0	8.13605	5.54962	42.6643	5.48576	35.396	0	2.76828	0	0	0	0
2000	1015	0.002771	0.005601	-14.7956	0.00058	0.002531	Fe''1.08Mg0.15Fe'''1.17Al0.23Cr0.15Ti0.23O4	0	8.32601	5.441	42.7776	5.12254	35.5955	0	2.73734	0	0	0	0
2000	1014	0.002825	0.005708	-15.051	0.000591	0.00258	Fe''1.09Mg0.15Fe'''1.17Al0.23Cr0.14Ti0.23O4	0	8.51771	5.33418	42.8829	4.7621	35.7962	0	2.70691	0	0	0	0
2000	1013	0.002882	0.005821	-15.3217	0.000603	0.002632	Fe''1.09Mg0.14Fe'''1.17Al0.22Cr0.13Ti0.24O4	0	8.71099	5.22918	42.9802	4.40462	35.998	0	2.677	0	0	0	0
2000	1012	0.002943	0.00594	-15.6095	0.000616	0.002687	Fe''1.10Mg0.14Fe'''1.18Al0.22Cr0.12Ti0.24O4	0	8.90564	5.12604	43.0698	4.05029	36.2006	0	2.64757	0	0	0	0
2000	1011	0.003007	0.006067	-15.9168	0.000629	0.002745	Fe''1.11Mg0.14Fe'''1.18Al0.22Cr0.11Ti0.25O4	0	9.10149	5.02477	43.1518	3.6993	36.404	0	2.61863	0	0	0	0
2000	1010	0.003076	0.006202	-16.2467	0.000643	0.002808	Fe''1.11Mg0.14Fe'''1.18Al0.21Cr0.10Ti0.25O4	0	9.29831	4.92541	43.2263	3.35181	36.608	0	2.59017	0	0	0	0
2000	1009	0.003149	0.006347	-16.6036	0.000659	0.002875	Fe''1.12Mg0.14Fe'''1.19Al0.21Cr0.09Ti0.26O4	0	9.4959	4.82798	43.2936	3.008	36.8124	0	2.56216	0	0	0	0
2000	1008	0.003229	0.006505	-16.9944	0.000675	0.002947	Fe''1.13Mg0.14Fe'''1.19Al0.20Cr0.08Ti0.27O4	0	9.69401	4.73249	43.3539	2.66805	37.0169	0	2.53461	0	0	0	0
2000	1007	0.003318	0.006679	-17.4292	0.000694	0.003028	Fe''1.13Mg0.14Fe'''1.19Al0.20Cr0.07Ti0.27O4	0	9.8924	4.63899	43.4075	2.33214	37.2215	0	2.50749	0	0	0	0
2000	1006	0.003418	0.006877	-17.9247	0.000714	0.003119	Fe''1.14Mg0.13Fe'''1.19Al0.20Cr0.06Ti0.28O4	0	10.0908	4.54748	43.4547	2.00048	37.4258	0	2.48079	0	0	0	0
2000	1005	0.003536	0.007109	-18.5099	0.000739	0.003226	Fe''1.15Mg0.13Fe'''1.19Al0.19Cr0.05Ti0.28O4	0	10.2887	4.45802	43.4958	1.67334	37.6296	0	2.4545	0	0	0	0
2000	1004	0.003681	0.007396	-19.2393	0.000769	0.003358	Fe''1.16Mg0.13Fe'''1.20Al0.19Cr0.04Ti0.29O4	0	10.4859	4.37066	43.5314	1.35108	37.8324	0	2.42861	0	0	0	0
2000	1003	0.003877	0.007783	-20.2293	0.00081	0.003536	Fe''1.16Mg0.13Fe'''1.20Al0.18Cr0.03Ti0.29O4	0	10.6814	4.28553	43.5621	1.03432	38.0336	0	2.40311	0	0	0	0
2000	1002	0.004179	0.008384	-21.7767	0.000873	0.003812	Fe''1.17Mg0.13Fe'''1.20Al0.18Cr0.02Ti0.30O4	0	10.874	4.20289	43.5888	0.724278	38.232	0	2.37799	0	0	0	0
2000	1001	0.004786	0.009593	-24.9002	0.000999	0.004365	Fe''1.18Mg0.13Fe'''1.20Al0.18Cr0.01Ti0.30O4	0	11.0601	4.1235	43.6142	0.424369	38.4245	0	2.35325	0	0	0	0
2000	999	0.023351	0.04672	-121.148	0.004874	0.021293	Fe''1.18Mg0.13Fe'''1.21Al0.17Cr0.00Ti0.31O4	0	11.2665	4.00812	43.7567	0	38.6634	0	2.30526	0	0	0	0
2000	998	0.030718	0.06142	-159.122	0.006409	0.028005	Fe''1.18Mg0.12Fe'''1.21Al0.17Cr0.00Ti0.31O4	0	11.1598	4.00054	43.9591	0	38.5981	0	2.28238	0	0	0	0
2000	997	0.030385	0.060714	-157.15	0.006337	0.027695	Fe''1.18Mg0.12Fe'''1.22Al0.17Cr0.00Ti0.30O4	0	11.053	3.99309	44.1618	0	38.5323	0	2.25973	0	0	0	0
2000	996	0.030059	0.060022	-155.221	0.006267	0.027391	Fe''1.18Mg0.12Fe'''1.22Al0.17Cr0.00Ti0.30O4	0	10.9461	3.98576	44.3647	0	38.4661	0	2.23733	0	0	0	0
2000	995	0.02974	0.059345	-153.333	0.006198	0.027093	Fe''1.18Mg0.12Fe'''1.23Al0.17Cr0.00Ti0.30O4	0	10.839	3.97854	44.568	0	38.3993	0	2.21517	0	0	0	0
2000	994	0.029427	0.058681	-151.484	0.00613	0.026802	Fe''1.18Mg0.12Fe'''1.24Al0.17Cr0.00Ti0.30O4	0	10.7318	3.97145	44.7714	0	38.3321	0	2.19325	0	0	0	0
2000	993	0.02912	0.058032	-149.675	0.006064	0.026517	Fe''1.17Mg0.12Fe'''1.24Al0.17Cr0.00Ti0.29O4	0	10.6244	3.96447	44.9751	0	38.2644	0	2.17156	0	0	0	0
2000	992	0.02882	0.057395	-147.904	0.006	0.026238	Fe''1.17Mg0.12Fe'''1.25Al0.17Cr0.00Ti0.29O4	0	10.5169	3.95761	45.179	0	38.1963	0	2.1501	0	0	0	0
2000	991	0.028526	0.056772	-146.171	0.005936	0.025964	Fe''1.17Mg0.12Fe'''1.25Al0.17Cr0.00Ti0.29O4	0	10.4093	3.95087	45.3832	0	38.1277	0	2.12887	0	0	0	0
2000	990	0.028239	0.056161	-144.474	0.005874	0.025697	Fe''1.17Mg0.12Fe'''1.26Al0.17Cr0.00Ti0.28O4	0	10.3016	3.94424	45.5876	0	38.0587	0	2.10787	0	0	0	0
2000	989	0.027957	0.055563	-142.812	0.005814	0.025434	Fe''1.17Mg0.11Fe'''1.27Al0.17Cr0.00Ti0.28O4	0	10.1938	3.93773	45.7922	0	37.9892	0	2.08709	0	0	0	0
2000	988	0.02768	0.054977	-141.185	0.005754	0.025178	Fe''1.17Mg0.11Fe'''1.27Al0.17Cr0.00Ti0.28O4	0	10.0858	3.93133	45.9969	0	37.9194	0	2.06654	0	0	0	0
2000	987	0.02741	0.054403	-139.593	0.005696	0.024926	Fe''1.16Mg0.11Fe'''1.28Al0.17Cr0.00Ti0.28O4	0	9.97777	3.92504	46.2019	0	37.8491	0	2.0462	0	0	0	0
2000	986	0.027145	0.053841	-138.033	0.005639	0.02468	Fe''1.16Mg0.11Fe'''1.28Al0.17Cr0.00Ti0.27O4	0	9.86961	3.91887	46.4071	0	37.7784	0	2.02608	0	0	0	0
2000	985	0.026886	0.053291	-136.507	0.005583	0.024438	Fe''1.16Mg0.11Fe'''1.29Al0.17Cr0.00Ti0.27O4	0	9.76136	3.91281	46.6124	0	37.7073	0	2.00618	0	0	0	0
2000	984	0.026631	0.052751	-135.012	0.005528	0.024202	Fe''1.16Mg0.11Fe'''1.30Al0.17Cr0.00Ti0.27O4	0	9.65302	3.90686	46.8179	0	37.6358	0	1.98649	0	0	0	0
2000	983	0.026382	0.052223	-133.548	0.005475	0.023971	Fe''1.16Mg0.11Fe'''1.30Al0.17Cr0.00Ti0.26O4	0	9.54459	3.90102	47.0235	0	37.5639	0	1.96701	0	0	0	0
2000	982	0.026139	0.051705	-132.115	0.005422	0.023744	Fe''1.15Mg0.11Fe'''1.31Al0.17Cr0.00Ti0.26O4	0	9.43607	3.89529	47.2293	0	37.4916	0	1.94774	0	0	0	0
2000	981	0.0259	0.051198	-130.712	0.005371	0.023522	Fe''1.15Mg0.11Fe'''1.31Al0.17Cr0.00Ti0.26O4	0	9.32749	3.88966	47.4352	0	37.419	0	1.92868	0	0	0	0
2000	980	0.025666	0.050702	-129.338	0.00532	0.023305	Fe''1.15Mg0.10Fe'''1.32Al0.17Cr0.00Ti0.26O4	0	9.21883	3.88414	47.6412	0	37.346	0	1.90982	0	0	0	0
2000	979	0.025437	0.050215	-127.993	0.005271	0.023092	Fe''1.15Mg0.10Fe'''1.33Al0.17Cr0.00Ti0.25O4	0	9.1101	3.87873	47.8473	0	37.2727	0	1.89116	0	0	0	0
2000	978	0.025213	0.049739	-126.677	0.005223	0.022884	Fe''1.15Mg0.10Fe'''1.33Al0.17Cr0.00Ti0.25O4	0	9.00132	3.87342	48.0536	0	37.199	0	1.8727	0	0	0	0
2000	977	0.024994	0.049272	-125.388	0.005176	0.02268	Fe''1.14Mg0.10Fe'''1.34Al0.17Cr0.00Ti0.25O4	0	8.89248	3.86821	48.2599	0	37.1249	0	1.85444	0	0	0	0
2000	976	0.024779	0.048815	-124.126	0.005129	0.02248	Fe''1.14Mg0.10Fe'''1.34Al0.17Cr0.00Ti0.24O4	0	8.78359	3.86311	48.4663	0	37.0506	0	1.83637	0	0	0	0
2000	975	0.024568	0.048368	-122.89	0.005084	0.022285	Fe''1.14Mg0.10Fe'''1.35Al0.17Cr0.00Ti0.24O4	0	8.67466	3.8581	48.6728	0	36.9759	0	1.8185	0	0	0	0
2000	974	0.024363	0.04793	-121.681	0.00504	0.022093	Fe''1.14Mg0.10Fe'''1.36Al0.17Cr0.00Ti0.24O4	0	8.56569	3.85319	48.8794	0	36.9009	0	1.80082	0	0	0	0
2000	973	0.024161	0.047501	-120.498	0.004997	0.021906	Fe''1.14Mg0.10Fe'''1.36Al0.17Cr0.00Ti0.23O4	0	8.45669	3.84839	49.086	0	36.8256	0	1.78334	0	0	0	0
2000	972	0.023964	0.047081	-119.339	0.004954	0.021723	Fe''1.13Mg0.10Fe'''1.37Al0.17Cr0.00Ti0.23O4	0	8.34766	3.84368	49.2926	0	36.75	0	1.76604	0	0	0	0
2000	971	0.023771	0.04667	-118.206	0.004913	0.021543	Fe''1.13Mg0.10Fe'''1.38Al0.17Cr0.00Ti0.23O4	0	8.23862	3.83906	49.4992	0	36.6742	0	1.74892	0	0	0	0
2000	970	0.023582	0.046267	-117.097	0.004872	0.021368	Fe''1.13Mg0.10Fe'''1.38Al0.17Cr0.00Ti0.23O4	0	8.12957	3.83454	49.7059	0	36.598	0	1.73199	0	0	0	0
2000	969	0.023398	0.045874	-116.012	0.004832	0.021196	Fe''1.13Mg0.09Fe'''1.39Al0.17Cr0.00Ti0.22O4	0	8.02052	3.83011	49.9125	0	36.5216	0	1.71524	0	0	0	0
2000	968	0.023217	0.045488	-114.95	0.004794	0.021029	Fe''1.13Mg0.09Fe'''1.39Al0.17Cr0.00Ti0.22O4	0	7.91147	3.82576	50.1192	0	36.4449	0	1.69868	0	0	0	0
2000	967	0.023041	0.045112	-113.912	0.004756	0.020864	Fe''1.12Mg0.09Fe'''1.40Al0.17Cr0.00Ti0.22O4	0	7.80243	3.82151	50.3258	0	36.368	0	1.68229	0	0	0	0
2000	966	0.022868	0.044743	-112.896	0.004719	0.020704	Fe''1.12Mg0.09Fe'''1.41Al0.17Cr0.00Ti0.21O4	0	7.69341	3.81734	50.5324	0	36.2908	0	1.66608	0	0	0	0
2000	965	0.0227	0.044382	-111.903	0.004682	0.020547	Fe''1.12Mg0.09Fe'''1.41Al0.17Cr0.00Ti0.21O4	0	7.58442	3.81326	50.7389	0	36.2134	0	1.65004	0	0	0	0
2000	964	0.022535	0.04403	-110.931	0.004647	0.020394	Fe''1.12Mg0.09Fe'''1.42Al0.17Cr0.00Ti0.21O4	0	7.47546	3.80926	50.9453	0	36.1358	0	1.63418	0	0	0	0
2000	963	0.015915	0.031075	-78.2467	0.003281	0.014399	Fe''1.12Mg0.09Fe'''1.42Al0.17Cr0.00Ti0.21O4	0	7.43072	3.78935	51.0429	0	36.1253	0	1.61172	0	0	0	0
2000	962	0.019004	0.037083	-93.3177	0.003916	0.017191	Fe''1.12Mg0.09Fe'''1.43Al0.16Cr0.00Ti0.20O4	0	7.35245	3.77826	51.1986	0	36.0748	0	1.59598	0	0	0	0
2000	961	0.018791	0.036642	-92.1529	0.003871	0.016994	Fe''1.12Mg0.09Fe'''1.43Al0.16Cr0.00Ti0.20O4	0	7.27449	3.7672	51.3536	0	36.0243	0	1.5804	0	0	0	0
2000	960	0.01858	0.036208	-91.0067	0.003827	0.0168	Fe''1.11Mg0.09Fe'''1.44Al0.16Cr0.00Ti0.20O4	0	7.19684	3.75619	51.5081	0	35.9739	0	1.56496	0	0	0	0
2000	959	0.018372	0.03578	-89.8786	0.003783	0.016609	Fe''1.11Mg0.09Fe'''1.44Al0.16Cr0.00Ti0.20O4	0	7.11949	3.74521	51.662	0	35.9236	0	1.54968	0	0	0	0
2000	958	0.018168	0.035358	-88.7683	0.00374	0.01642	Fe''1.11Mg0.08Fe'''1.44Al0.16Cr0.00Ti0.20O4	0	7.04246	3.73428	51.8154	0	35.8733	0	1.53454	0	0	0	0
2000	957	0.017966	0.034943	-87.6756	0.003697	0.016235	Fe''1.11Mg0.08Fe'''1.45Al0.16Cr0.00Ti0.19O4	0	6.96575	3.72337	51.9682	0	35.8231	0	1.51956	0	0	0	0
2000	956	0.017767	0.034534	-86.6001	0.003655	0.016052	Fe''1.11Mg0.08Fe'''1.45Al0.16Cr0.00Ti0.19O4	0	6.88937	3.7125	52.1204	0	35.773	0	1.50471	0	0	0	0
2000	955	0.017571	0.034131	-85.5415	0.003614	0.015872	Fe''1.11Mg0.08Fe'''1.46Al0.16Cr0.00Ti0.19O4	0	6.81331	3.70166	52.272	0	35.723	0	1.49001	0	0	0	0
2000	954	0.017378	0.033734	-84.4994	0.003573	0.015694	Fe''1.11Mg0.08Fe'''1.46Al0.16Cr0.00Ti0.19O4	0	6.73758	3.69086	52.423	0	35.6731	0	1.47545	0	0	0	0
2000	953	0.017188	0.033342	-83.4736	0.003533	0.015519	Fe''1.11Mg0.08Fe'''1.47Al0.16Cr0.00Ti0.19O4	0	6.66218	3.68007	52.5734	0	35.6233	0	1.46103	0	0	0	0
2000	952	0.017	0.032957	-82.4638	0.003493	0.015346	Fe''1.10Mg0.08Fe'''1.47Al0.16Cr0.00Ti0.18O4	0	6.58712	3.66932	52.7232	0	35.5736	0	1.44675	0	0	0	0
2000	951	0.016815	0.032577	-81.4697	0.003455	0.015176	Fe''1.10Mg0.08Fe'''1.48Al0.16Cr0.00Ti0.18O4	0	6.51241	3.65859	52.8724	0	35.524	0	1.43261	0	0	0	0
2000	950	0.016633	0.032203	-80.491	0.003416	0.015009	Fe''1.10Mg0.08Fe'''1.48Al0.16Cr0.00Ti0.18O4	0	6.43804	3.64788	53.021	0	35.4745	0	1.41861	0	0	0	0
2000	949	0.016453	0.031834	-79.5274	0.003378	0.014844	Fe''1.10Mg0.08Fe'''1.49Al0.16Cr0.00Ti0.18O4	0	6.36402	3.6372	53.1689	0	35.4251	0	1.40473	0	0	0	0
2000	948	0.016276	0.031471	-78.5788	0.003341	0.014681	Fe''1.10Mg0.08Fe'''1.49Al0.16Cr0.00Ti0.18O4	0	6.29036	3.62654	53.3162	0	35.3759	0	1.39099	0	0	0	0
2000	947	0.016101	0.031113	-77.6447	0.003304	0.01452	Fe''1.10Mg0.08Fe'''1.49Al0.16Cr0.00Ti0.17O4	0	6.21705	3.61589	53.4629	0	35.3268	0	1.37738	0	0	0	0
2000	946	0.015929	0.03076	-76.725	0.003268	0.014362	Fe''1.10Mg0.08Fe'''1.50Al0.16Cr0.00Ti0.17O4	0	6.14411	3.60526	53.6089	0	35.2778	0	1.3639	0	0	0	0
2000	945	0.015759	0.030412	-75.8193	0.003232	0.014206	Fe''1.09Mg0.07Fe'''1.50Al0.16Cr0.00Ti0.17O4	0	6.07153	3.59465	53.7542	0	35.229	0	1.35055	0	0	0	0
2000	944	0.015592	0.030069	-74.9275	0.003197	0.014052	Fe''1.09Mg0.07Fe'''1.51Al0.16Cr0.00Ti0.17O4	0	5.99932	3.58404	53.8989	0	35.1804	0	1.33733	0	0	0	0
2000	943	0.015427	0.029731	-74.0493	0.003162	0.013901	Fe''1.09Mg0.07Fe'''1.51Al0.16Cr0.00Ti0.17O4	0	5.92748	3.57346	54.043	0	35.1319	0	1.32423	0	0	0	0
2000	942	0.015264	0.029398	-73.1845	0.003128	0.013751	Fe''1.09Mg0.07Fe'''1.52Al0.16Cr0.00Ti0.16O4	0	5.85602	3.56288	54.1863	0	35.0835	0	1.31126	0	0	0	0
2000	941	0.015103	0.02907	-72.3328	0.003095	0.013604	Fe''1.09Mg0.07Fe'''1.52Al0.16Cr0.00Ti0.16O4	0	5.78494	3.55231	54.329	0	35.0353	0	1.29841	0	0	0	0
2000	940	0.014945	0.028746	-71.494	0.003061	0.013458	Fe''1.09Mg0.07Fe'''1.52Al0.16Cr0.00Ti0.16O4	0	5.71425	3.54175	54.471	0	34.9873	0	1.28568	0	0	0	0
2000	939	0.014789	0.028427	-70.6678	0.003029	0.013315	Fe''1.09Mg0.07Fe'''1.53Al0.15Cr0.00Ti0.16O4	0	5.64394	3.53119	54.6123	0	34.9395	0	1.27307	0	0	0	0
2000	938	0.014635	0.028113	-69.8541	0.002996	0.013174	Fe''1.09Mg0.07Fe'''1.53Al0.15Cr0.00Ti0.16O4	0	5.57403	3.52064	54.7529	0	34.8919	0	1.26058	0	0	0	0
2000	937	0.014483	0.027803	-69.0526	0.002964	0.013035	Fe''1.08Mg0.07Fe'''1.54Al0.15Cr0.00Ti0.15O4	0	5.50451	3.51009	54.8928	0	34.8444	0	1.2482	0	0	0	0
2000	936	0.014333	0.027497	-68.2632	0.002933	0.012897	Fe''1.08Mg0.07Fe'''1.54Al0.15Cr0.00Ti0.15O4	0	5.43539	3.49955	55.032	0	34.7971	0	1.23595	0	0	0	0
2000	935	0.014185	0.027196	-67.4856	0.002902	0.012762	Fe''1.08Mg0.07Fe'''1.55Al0.15Cr0.00Ti0.15O4	0	5.36667	3.489	55.1705	0	34.7501	0	1.22381	0	0	0	0
2000	934	0.014039	0.026899	-66.7195	0.002871	0.012628	Fe''1.08Mg0.07Fe'''1.55Al0.15Cr0.00Ti0.15O4	0	5.29836	3.47845	55.3082	0	34.7032	0	1.21178	0	0	0	0
2000	933	0.013896	0.026606	-65.9649	0.002841	0.012496	Fe''1.08Mg0.07Fe'''1.55Al0.15Cr0.00Ti0.15O4	0	5.23046	3.4679	55.4453	0	34.6565	0	1.19986	0	0	0	0
2000	932	0.014082	0.026945	-66.7742	0.002879	0.012661	Fe''1.08Mg0.07Fe'''1.56Al0.15Cr0.00Ti0.14O4	0	5.15893	3.45849	55.5878	0	34.6072	0	1.18763	0	0	0	0
2000	931	0.013675	0.02615	-64.778	0.002795	0.012293	Fe''1.08Mg0.07Fe'''1.56Al0.15Cr0.00Ti0.14O4	0	5.09115	3.44814	55.7244	0	34.5604	0	1.17586	0	0	0	0
2000	930	0.013539	0.025872	-64.0615	0.002766	0.012168	Fe''1.08Mg0.06Fe'''1.57Al0.15Cr0.00Ti0.14O4	0	5.02378	3.43778	55.8603	0	34.5139	0	1.1642	0	0	0	0
2000	929	0.013404	0.025598	-63.3563	0.002738	0.012045	Fe''1.07Mg0.06Fe'''1.57Al0.15Cr0.00Ti0.14O4	0	4.95682	3.42742	55.9955	0	34.4676	0	1.15265	0	0	0	0
2000	928	0.013271	0.025328	-62.6621	0.00271	0.011923	Fe''1.07Mg0.06Fe'''1.58Al0.15Cr0.00Ti0.14O4	0	4.89029	3.41705	56.1299	0	34.4215	0	1.14121	0	0	0	0
2000	927	0.01314	0.025061	-61.9788	0.002683	0.011803	Fe''1.07Mg0.06Fe'''1.58Al0.15Cr0.00Ti0.14O4	0	4.82417	3.40667	56.2636	0	34.3757	0	1.12987	0	0	0	0
2000	926	0.013011	0.024799	-61.3061	0.002656	0.011685	Fe''1.07Mg0.06Fe'''1.58Al0.15Cr0.00Ti0.13O4	0	4.75848	3.39628	56.3966	0	34.33	0	1.11863	0	0	0	0
2000	925	0.012884	0.024541	-60.644	0.002629	0.011569	Fe''1.07Mg0.06Fe'''1.59Al0.15Cr0.00Ti0.13O4	0	4.69321	3.38588	56.5288	0	34.2847	0	1.1075	0	0	0	0
2000	924	0.012758	0.024286	-59.9921	0.002603	0.011454	Fe''1.07Mg0.06Fe'''1.59Al0.15Cr0.00Ti0.13O4	0	4.62837	3.37547	56.6602	0	34.2395	0	1.09647	0	0	0	0
2000	923	0.012635	0.024036	-59.3504	0.002577	0.011341	Fe''1.07Mg0.06Fe'''1.60Al0.15Cr0.00Ti0.13O4	0	4.56396	3.36506	56.7909	0	34.1946	0	1.08553	0	0	0	0
2000	922	0.012513	0.023789	-58.7187	0.002552	0.011229	Fe''1.07Mg0.06Fe'''1.60Al0.15Cr0.00Ti0.13O4	0	4.49998	3.35463	56.9207	0	34.1499	0	1.0747	0	0	0	0
2000	921	0.012393	0.023545	-58.0968	0.002527	0.01112	Fe''1.07Mg0.06Fe'''1.60Al0.15Cr0.00Ti0.12O4	0	4.43644	3.34418	57.0499	0	34.1055	0	1.06397	0	0	0	0
2000	920	0.012275	0.023306	-57.4845	0.002502	0.011011	Fe''1.06Mg0.06Fe'''1.61Al0.15Cr0.00Ti0.12O4	0	4.37333	3.33372	57.1782	0	34.0614	0	1.05333	0	0	0	0
2000	919	0.012159	0.023069	-56.8817	0.002478	0.010905	Fe''1.06Mg0.06Fe'''1.61Al0.15Cr0.00Ti0.12O4	0	4.31066	3.32325	57.3058	0	34.0175	0	1.04278	0	0	0	0
2000	918	0.012044	0.022837	-56.2883	0.002454	0.0108	Fe''1.06Mg0.06Fe'''1.62Al0.15Cr0.00Ti0.12O4	0	4.24844	3.31277	57.4326	0	33.9739	0	1.03233	0	0	0	0
2000	917	0.011931	0.022607	-55.7041	0.00243	0.010696	Fe''1.06Mg0.06Fe'''1.62Al0.15Cr0.00Ti0.12O4	0	4.18665	3.30226	57.5586	0	33.9305	0	1.02198	0	0	0	0
2000	916	0.011819	0.022381	-55.1288	0.002407	0.010594	Fe''1.06Mg0.06Fe'''1.62Al0.15Cr0.00Ti0.12O4	0	4.12531	3.29174	57.6838	0	33.8874	0	1.01171	0	0	0	0
2000	915	0.011709	0.022159	-54.5625	0.002384	0.010494	Fe''1.06Mg0.06Fe'''1.63Al0.14Cr0.00Ti0.11O4	0	4.06443	3.2812	57.8082	0	33.8446	0	1.00154	0	0	0	0
2000	914	0.011601	0.02194	-54.0049	0.002362	0.010395	Fe''1.06Mg0.06Fe'''1.63Al0.14Cr0.00Ti0.11O4	0	4.00399	3.27065	57.9319	0	33.802	0	0.991456	0	0	0	0
2000	913	0.011494	0.021724	-53.4558	0.002339	0.010297	Fe''1.06Mg0.05Fe'''1.63Al0.14Cr0.00Ti0.11O4	0	3.944	3.26007	58.0547	0	33.7598	0	0.981462	0	0	0	0
2000	912	0.011389	0.021511	-52.9152	0.002317	0.010201	Fe''1.06Mg0.05Fe'''1.64Al0.14Cr0.00Ti0.11O4	0	3.88447	3.24947	58.1767	0	33.7178	0	0.971555	0	0	0	0
2000	911	0.011285	0.021301	-52.3829	0.002296	0.010106	Fe''1.05Mg0.05Fe'''1.64Al0.14Cr0.00Ti0.11O4	0	3.8254	3.23886	58.2979	0	33.6761	0	0.961735	0	0	0	0
2000	910	0.011183	0.021094	-51.8588	0.002275	0.010013	Fe''1.05Mg0.05Fe'''1.65Al0.14Cr0.00Ti0.11O4	0	3.76678	3.22822	58.4183	0	33.6347	0	0.952001	0	0	0	0
2000	909	0.011082	0.02089	-51.3426	0.002254	0.00992	Fe''1.05Mg0.05Fe'''1.65Al0.14Cr0.00Ti0.10O4	0	3.70863	3.21756	58.5378	0	33.5936	0	0.942352	0	0	0	0
2000	908	0.010982	0.02069	-50.8344	0.002233	0.00983	Fe''1.05Mg0.05Fe'''1.65Al0.14Cr0.00Ti0.10O4	0	3.65094	3.20687	58.6566	0	33.5528	0	0.932786	0	0	0	0
2000	907	0.010884	0.020492	-50.3339	0.002212	0.00974	Fe''1.05Mg0.05Fe'''1.66Al0.14Cr0.00Ti0.10O4	0	3.59372	3.19617	58.7745	0	33.5123	0	0.923304	0	0	0	0
2000	906	0.010788	0.020297	-49.8409	0.002192	0.009652	Fe''1.05Mg0.05Fe'''1.66Al0.14Cr0.00Ti0.10O4	0	3.53697	3.18544	58.8916	0	33.4721	0	0.913903	0	0	0	0
2000	905	0.010693	0.020105	-49.3555	0.002173	0.009565	Fe''1.05Mg0.05Fe'''1.66Al0.14Cr0.00Ti0.10O4	0	3.48068	3.17468	59.0078	0	33.4322	0	0.904583	0	0	0	0
2000	904	0.010599	0.019915	-48.8774	0.002153	0.009479	Fe''1.05Mg0.05Fe'''1.67Al0.14Cr0.00Ti0.10O4	0	3.42488	3.1639	59.1232	0	33.3927	0	0.895342	0	0	0	0
2000	903	0.010506	0.019729	-48.4065	0.002134	0.009395	Fe''1.05Mg0.05Fe'''1.67Al0.14Cr0.00Ti0.09O4	0	3.36954	3.1531	59.2378	0	33.3534	0	0.886181	0	0	0	0
2000	902	0.010415	0.019545	-47.9427	0.002115	0.009311	Fe''1.04Mg0.05Fe'''1.67Al0.14Cr0.00Ti0.09O4	0	3.31469	3.14226	59.3515	0	33.3145	0	0.877098	0	0	0	0
2000	901	0.010325	0.019363	-47.4859	0.002096	0.009229	Fe''1.04Mg0.05Fe'''1.68Al0.14Cr0.00Ti0.09O4	0	3.26031	3.13141	59.4643	0	33.2759	0	0.868092	0	0	0	0
2000	900	0.010236	0.019185	-47.0359	0.002078	0.009148	Fe''1.04Mg0.05Fe'''1.68Al0.14Cr0.00Ti0.09O4	0	3.20641	3.12052	59.5763	0	33.2376	0	0.859162	0	0	0	0
clinopyroxene_0	thermodynamic	data	and	composition:
Pressure	Temperature	mass	S	H	V	Cp	structure	formula	SiO2	TiO2	Al2O3	Fe2O3	Cr2O3	FeO	MnO	MgO	CaO	Na2O	K2O	H2O
2000	1151	0.160282	0.373666	-2040.19	0.049565	0.191812	cpx	Na0.01Ca0.67Fe''0.22Mg0.98Fe'''0.03Ti0.00Al0.17Si1.90O6	52.1263	0.0629642	3.92768	1.17862	0	7.28602	0	18.007	17.2042	0.207183	0	0
2000	1150	0.127219	0.296455	-1618.93	0.039333	0.152202	cpx	Na0.01Ca0.67Fe''0.22Mg0.98Fe'''0.03Ti0.00Al0.17Si1.90O6	52.1141	0.0640033	3.92701	1.18395	0	7.31925	0	17.9747	17.2088	0.208208	0	0
2000	1149	0.12383	0.288433	-1575.41	0.038278	0.148107	cpx	Na0.01Ca0.67Fe''0.22Mg0.98Fe'''0.03Ti0.00Al0.17Si1.90O6	52.1018	0.0650535	3.92634	1.1893	0	7.35246	0	17.9423	17.2136	0.209237	0	0
2000	1148	0.120142	0.27972	-1528.11	0.037131	0.143656	cpx	Na0.01Ca0.67Fe''0.23Mg0.98Fe'''0.03Ti0.00Al0.17Si1.90O6	52.0894	0.0661151	3.92569	1.19467	0	7.38564	0	17.9098	17.2184	0.210269	0	0
2000	1147	0.116576	0.271299	-1482.38	0.036022	0.139353	cpx	Na0.01Ca0.67Fe''0.23Mg0.97Fe'''0.03Ti0.00Al0.17Si1.90O6	52.0771	0.0671882	3.92504	1.20004	0	7.41879	0	17.8772	17.2233	0.211306	0	0
2000	1146	0.113128	0.263158	-1438.17	0.034949	0.135194	cpx	Na0.02Ca0.68Fe''0.23Mg0.97Fe'''0.03Ti0.00Al0.17Si1.90O6	52.0647	0.0682729	3.92441	1.20543	0	7.45192	0	17.8445	17.2284	0.212346	0	0
2000	1145	0.109793	0.255288	-1395.42	0.033912	0.131171	cpx	Na0.02Ca0.68Fe''0.23Mg0.97Fe'''0.03Ti0.00Al0.17Si1.90O6	52.0523	0.0693695	3.92378	1.21083	0	7.48503	0	17.8118	17.2335	0.213391	0	0
2000	1144	0.106566	0.247676	-1354.07	0.032909	0.127281	cpx	Na0.02Ca0.68Fe''0.23Mg0.97Fe'''0.03Ti0.00Al0.17Si1.90O6	52.0399	0.0704779	3.92317	1.21624	0	7.51811	0	17.779	17.2387	0.214439	0	0
2000	1143	0.103444	0.240314	-1314.07	0.031939	0.123517	cpx	Na0.02Ca0.68Fe''0.23Mg0.97Fe'''0.03Ti0.00Al0.17Si1.90O6	52.0274	0.0715983	3.92256	1.22166	0	7.55117	0	17.7461	17.244	0.215491	0	0
2000	1142	0.100423	0.233192	-1275.37	0.031	0.119876	cpx	Na0.02Ca0.68Fe''0.23Mg0.97Fe'''0.03Ti0.00Al0.17Si1.90O6	52.0149	0.072731	3.92197	1.2271	0	7.58422	0	17.7131	17.2494	0.216548	0	0
2000	1141	0.097498	0.226301	-1237.92	0.030092	0.116352	cpx	Na0.02Ca0.68Fe''0.23Mg0.97Fe'''0.03Ti0.00Al0.17Si1.90O6	52.0024	0.073876	3.92139	1.23256	0	7.61724	0	17.6801	17.2548	0.217608	0	0
2000	1140	0.094667	0.219633	-1201.67	0.029212	0.112942	cpx	Na0.02Ca0.68Fe''0.23Mg0.96Fe'''0.03Ti0.00Al0.17Si1.90O6	51.9898	0.0750334	3.92081	1.23803	0	7.65026	0	17.647	17.2604	0.218673	0	0
2000	1139	0.091926	0.213179	-1166.58	0.028361	0.109641	cpx	Na0.02Ca0.68Fe''0.24Mg0.96Fe'''0.03Ti0.00Al0.17Si1.90O6	51.9772	0.0762034	3.92025	1.24351	0	7.68325	0	17.6138	17.266	0.219742	0	0
2000	1138	0.089272	0.206931	-1132.61	0.027536	0.106444	cpx	Na0.02Ca0.68Fe''0.24Mg0.96Fe'''0.03Ti0.00Al0.17Si1.90O6	51.9646	0.0773862	3.91969	1.24901	0	7.71624	0	17.5805	17.2717	0.220815	0	0
2000	1137	0.086701	0.200882	-1099.71	0.026738	0.103349	cpx	Na0.02Ca0.68Fe''0.24Mg0.96Fe'''0.03Ti0.00Al0.17Si1.90O6	51.952	0.0785819	3.91915	1.25453	0	7.74922	0	17.5471	17.2775	0.221893	0	0
2000	1136	0.08421	0.195024	-1067.85	0.025965	0.100352	cpx	Na0.02Ca0.68Fe''0.24Mg0.96Fe'''0.03Ti0.00Al0.17Si1.90O6	51.9393	0.0797907	3.91862	1.26006	0	7.78219	0	17.5137	17.2834	0.222975	0	0
2000	1135	0.081797	0.189352	-1036.99	0.025216	0.097449	cpx	Na0.02Ca0.68Fe''0.24Mg0.96Fe'''0.03Ti0.00Al0.17Si1.90O6	51.9265	0.0810127	3.91809	1.26561	0	7.81515	0	17.4802	17.2894	0.224062	0	0
2000	1134	0.079459	0.183857	-1007.09	0.02449	0.094636	cpx	Na0.02Ca0.68Fe''0.24Mg0.95Fe'''0.04Ti0.00Al0.17Si1.90O6	51.9138	0.0822481	3.91758	1.27117	0	7.8481	0	17.4466	17.2954	0.225153	0	0
2000	1133	0.077193	0.178534	-978.119	0.023787	0.091911	cpx	Na0.02Ca0.68Fe''0.24Mg0.95Fe'''0.04Ti0.00Al0.17Si1.90O6	51.901	0.0834969	3.91708	1.27676	0	7.88105	0	17.4129	17.3015	0.226248	0	0
2000	1132	0.074997	0.173376	-950.047	0.023106	0.08927	cpx	Na0.02Ca0.68Fe''0.24Mg0.95Fe'''0.04Ti0.00Al0.17Si1.90O6	51.8881	0.0847595	3.91658	1.28236	0	7.914	0	17.3791	17.3077	0.227349	0	0
2000	1131	0.072868	0.168379	-922.84	0.022446	0.086711	cpx	Na0.02Ca0.68Fe''0.24Mg0.95Fe'''0.04Ti0.00Al0.17Si1.90O6	51.8752	0.086036	3.9161	1.28798	0	7.94695	0	17.3453	17.3139	0.228454	0	0
2000	1130	0.070804	0.163536	-896.469	0.021805	0.08423	cpx	Na0.02Ca0.68Fe''0.24Mg0.95Fe'''0.04Ti0.00Al0.17Si1.90O6	51.8623	0.0873265	3.91563	1.29362	0	7.9799	0	17.3114	17.3202	0.229563	0	0
2000	1129	0.068802	0.158841	-870.904	0.021185	0.081826	cpx	Na0.02Ca0.68Fe''0.25Mg0.95Fe'''0.04Ti0.00Al0.17Si1.90O6	51.8494	0.0886312	3.91517	1.29928	0	8.01286	0	17.2774	17.3266	0.230678	0	0
2000	1128	0.066861	0.154291	-846.117	0.020583	0.079494	cpx	Na0.02Ca0.68Fe''0.25Mg0.94Fe'''0.04Ti0.00Al0.17Si1.90O6	51.8364	0.0899502	3.91472	1.30496	0	8.04581	0	17.2433	17.3331	0.231797	0	0
2000	1127	0.064978	0.149879	-822.082	0.02	0.077233	cpx	Na0.02Ca0.68Fe''0.25Mg0.94Fe'''0.04Ti0.00Al0.17Si1.90O6	51.8234	0.0912839	3.91428	1.31066	0	8.07878	0	17.2091	17.3396	0.232921	0	0
2000	1126	0.063152	0.145601	-798.773	0.019434	0.075041	cpx	Na0.02Ca0.68Fe''0.25Mg0.94Fe'''0.04Ti0.00Al0.17Si1.90O6	51.8103	0.0926322	3.91385	1.31638	0	8.11175	0	17.1749	17.3462	0.23405	0	0
2000	1125	0.061381	0.141453	-776.166	0.018885	0.072915	cpx	Na0.02Ca0.68Fe''0.25Mg0.94Fe'''0.04Ti0.00Al0.17Si1.90O6	51.7972	0.0939955	3.91343	1.32213	0	8.14473	0	17.1405	17.3528	0.235184	0	0
2000	1124	0.059662	0.137429	-754.237	0.018352	0.070852	cpx	Na0.02Ca0.68Fe''0.25Mg0.94Fe'''0.04Ti0.00Al0.17Si1.90O6	51.784	0.0953739	3.91302	1.32789	0	8.17773	0	17.1061	17.3595	0.236323	0	0
2000	1123	0.057994	0.133527	-732.964	0.017836	0.068852	cpx	Na0.02Ca0.68Fe''0.25Mg0.94Fe'''0.04Ti0.00Al0.17Si1.90O6	51.7708	0.0967676	3.91262	1.33368	0	8.21073	0	17.0716	17.3663	0.237467	0	0
2000	1122	0.056376	0.129742	-712.324	0.017335	0.06691	cpx	Na0.02Ca0.68Fe''0.25Mg0.93Fe'''0.04Ti0.00Al0.17Si1.90O6	51.7576	0.0981768	3.91223	1.33949	0	8.24375	0	17.037	17.3731	0.238616	0	0
2000	1121	0.054805	0.12607	-692.296	0.016848	0.065027	cpx	Na0.02Ca0.68Fe''0.25Mg0.93Fe'''0.04Ti0.00Al0.17Si1.90O6	51.7443	0.0996017	3.91185	1.34532	0	8.27679	0	17.0024	17.38	0.239771	0	0
2000	1120	0.053281	0.122507	-672.861	0.016376	0.063199	cpx	Na0.02Ca0.69Fe''0.26Mg0.93Fe'''0.04Ti0.00Al0.17Si1.90O6	51.731	0.101042	3.91149	1.35118	0	8.30985	0	16.9676	17.3869	0.24093	0	0
2000	1119	0.051801	0.119049	-653.999	0.015918	0.061426	cpx	Na0.02Ca0.69Fe''0.26Mg0.93Fe'''0.04Ti0.00Al0.17Si1.90O6	51.7176	0.102499	3.91113	1.35706	0	8.34292	0	16.9328	17.3939	0.242095	0	0
2000	1118	0.050364	0.115694	-635.692	0.015474	0.059704	cpx	Na0.02Ca0.69Fe''0.26Mg0.93Fe'''0.04Ti0.00Al0.17Si1.90O6	51.7042	0.103973	3.91079	1.36296	0	8.37602	0	16.8979	17.4009	0.243265	0	0
2000	1117	0.048969	0.112438	-617.921	0.015042	0.058033	cpx	Na0.02Ca0.69Fe''0.26Mg0.93Fe'''0.04Ti0.00Al0.17Si1.90O6	51.6907	0.105462	3.91045	1.36889	0	8.40914	0	16.8629	17.408	0.24444	0	0
2000	1116	0.047614	0.109278	-600.669	0.014623	0.056411	cpx	Na0.02Ca0.69Fe''0.26Mg0.92Fe'''0.04Ti0.00Al0.17Si1.90O6	51.6772	0.106969	3.91013	1.37485	0	8.44229	0	16.8278	17.4151	0.245621	0	0
2000	1115	0.046299	0.10621	-583.92	0.014216	0.054836	cpx	Na0.02Ca0.69Fe''0.26Mg0.92Fe'''0.04Ti0.00Al0.17Si1.90O6	51.6637	0.108492	3.90982	1.38083	0	8.47546	0	16.7926	17.4223	0.246808	0	0
2000	1114	0.045021	0.103232	-567.657	0.013821	0.053307	cpx	Na0.02Ca0.69Fe''0.26Mg0.92Fe'''0.04Ti0.00Al0.17Si1.90O6	51.6501	0.110032	3.90952	1.38684	0	8.50866	0	16.7573	17.4296	0.247999	0	0
2000	1113	0.04378	0.10034	-551.865	0.013437	0.051822	cpx	Na0.02Ca0.69Fe''0.26Mg0.92Fe'''0.04Ti0.00Al0.17Si1.90O6	51.6364	0.11159	3.90924	1.39288	0	8.54189	0	16.7219	17.4368	0.249197	0	0
2000	1112	0.042575	0.097533	-536.53	0.013065	0.05038	cpx	Na0.02Ca0.69Fe''0.26Mg0.92Fe'''0.04Ti0.00Al0.17Si1.90O6	51.6227	0.113166	3.90896	1.39894	0	8.57516	0	16.6865	17.4442	0.2504	0	0
2000	1111	0.041404	0.094807	-521.636	0.012703	0.04898	cpx	Na0.02Ca0.69Fe''0.27Mg0.91Fe'''0.04Ti0.00Al0.17Si1.90O6	51.609	0.114759	3.90869	1.40503	0	8.60845	0	16.6509	17.4515	0.251608	0	0
2000	1110	0.040267	0.09216	-507.17	0.012351	0.04762	cpx	Na0.02Ca0.69Fe''0.27Mg0.91Fe'''0.04Ti0.00Al0.17Si1.90O6	51.5952	0.116371	3.90844	1.41115	0	8.64179	0	16.6153	17.459	0.252823	0	0
2000	1109	0.039162	0.089589	-493.119	0.01201	0.046299	cpx	Na0.02Ca0.69Fe''0.27Mg0.91Fe'''0.04Ti0.00Al0.17Si1.90O6	51.5813	0.118	3.9082	1.4173	0	8.67516	0	16.5796	17.4664	0.254043	0	0
2000	1108	0.038088	0.087093	-479.469	0.011678	0.045016	cpx	Na0.02Ca0.69Fe''0.27Mg0.91Fe'''0.04Ti0.00Al0.17Si1.90O6	51.5674	0.119649	3.90797	1.42348	0	8.70857	0	16.5438	17.4739	0.255268	0	0
2000	1107	0.037045	0.084668	-466.209	0.011356	0.04377	cpx	Na0.02Ca0.69Fe''0.27Mg0.91Fe'''0.04Ti0.00Al0.17Si1.90O6	51.5534	0.121316	3.90776	1.42969	0	8.74202	0	16.5079	17.4814	0.2565	0	0
2000	1106	0.036031	0.082312	-453.327	0.011043	0.042559	cpx	Na0.02Ca0.69Fe''0.27Mg0.91Fe'''0.04Ti0.00Al0.17Si1.90O6	51.5394	0.123002	3.90755	1.43593	0	8.77551	0	16.4719	17.489	0.257738	0	0
2000	1105	0.035046	0.080024	-440.81	0.010739	0.041382	cpx	Na0.02Ca0.69Fe''0.27Mg0.90Fe'''0.04Ti0.00Al0.17Si1.90O6	51.5253	0.124708	3.90736	1.4422	0	8.80905	0	16.4358	17.4966	0.258981	0	0
2000	1104	0.034088	0.077801	-428.648	0.010443	0.040239	cpx	Na0.02Ca0.69Fe''0.27Mg0.90Fe'''0.04Ti0.00Al0.17Si1.90O6	51.5112	0.126433	3.90718	1.4485	0	8.84263	0	16.3996	17.5042	0.260231	0	0
2000	1103	0.033157	0.075642	-416.83	0.010156	0.039129	cpx	Na0.02Ca0.69Fe''0.27Mg0.90Fe'''0.04Ti0.00Al0.17Si1.90O6	51.497	0.128178	3.90701	1.45484	0	8.87627	0	16.3633	17.5119	0.261487	0	0
2000	1102	0.032253	0.073544	-405.346	0.009877	0.038049	cpx	Na0.02Ca0.69Fe''0.28Mg0.90Fe'''0.04Ti0.00Al0.17Si1.90O6	51.4828	0.129943	3.90686	1.46121	0	8.90995	0	16.3269	17.5196	0.262748	0	0
2000	1101	0.031373	0.071505	-394.185	0.009606	0.037	cpx	Na0.02Ca0.69Fe''0.28Mg0.90Fe'''0.04Ti0.00Al0.17Si1.90O6	51.4685	0.131728	3.90672	1.46761	0	8.94368	0	16.2904	17.5274	0.264016	0	0
2000	1100	0.030518	0.069524	-383.338	0.009342	0.035981	cpx	Na0.02Ca0.69Fe''0.28Mg0.89Fe'''0.04Ti0.00Al0.17Si1.90O6	51.4541	0.133535	3.90659	1.47404	0	8.97747	0	16.2539	17.5351	0.265291	0	0
2000	1099	0.029687	0.067599	-372.796	0.009086	0.03499	cpx	Na0.02Ca0.69Fe''0.28Mg0.89Fe'''0.04Ti0.00Al0.17Si1.90O6	51.4397	0.135362	3.90647	1.48051	0	9.01131	0	16.2172	17.5429	0.266571	0	0
2000	1098	0.028879	0.065729	-362.549	0.008837	0.034027	cpx	Na0.02Ca0.69Fe''0.28Mg0.89Fe'''0.04Ti0.00Al0.17Si1.90O6	51.4252	0.13721	3.90637	1.48702	0	9.04522	0	16.1804	17.5507	0.267858	0	0
2000	1097	0.028094	0.063911	-352.589	0.008594	0.033092	cpx	Na0.02Ca0.70Fe''0.28Mg0.89Fe'''0.04Ti0.00Al0.17Si1.90O6	51.4106	0.13908	3.90628	1.49356	0	9.07918	0	16.1435	17.5586	0.269151	0	0
2000	1096	0.02733	0.062144	-342.907	0.008359	0.032182	cpx	Na0.02Ca0.70Fe''0.28Mg0.89Fe'''0.04Ti0.00Al0.17Si1.90O6	51.396	0.140972	3.90621	1.50014	0	9.1132	0	16.1065	17.5665	0.270451	0	0
2000	1095	0.026587	0.060427	-333.496	0.00813	0.031298	cpx	Na0.02Ca0.70Fe''0.28Mg0.89Fe'''0.04Ti0.00Al0.17Si1.90O6	51.3813	0.142886	3.90615	1.50675	0	9.14728	0	16.0695	17.5744	0.271757	0	0
2000	1094	0.025865	0.058758	-324.346	0.007908	0.030438	cpx	Na0.02Ca0.70Fe''0.28Mg0.88Fe'''0.04Ti0.00Al0.17Si1.90O6	51.3666	0.144823	3.9061	1.5134	0	9.18143	0	16.0323	17.5823	0.273069	0	0
2000	1093	0.025163	0.057136	-315.451	0.007691	0.029602	cpx	Na0.02Ca0.70Fe''0.29Mg0.88Fe'''0.04Ti0.00Al0.17Si1.90O6	51.3518	0.146782	3.90607	1.52009	0	9.21565	0	15.995	17.5902	0.274389	0	0
2000	1092	0.02448	0.055559	-306.804	0.007481	0.02879	cpx	Na0.02Ca0.70Fe''0.29Mg0.88Fe'''0.04Ti0.00Al0.17Si1.90O6	51.3369	0.148765	3.90605	1.52682	0	9.24994	0	15.9576	17.5982	0.275715	0	0
2000	1091	0.023816	0.054026	-298.396	0.007277	0.028	cpx	Na0.02Ca0.70Fe''0.29Mg0.88Fe'''0.04Ti0.00Al0.17Si1.90O6	51.3219	0.150771	3.90605	1.53359	0	9.28429	0	15.9201	17.6062	0.277047	0	0
2000	1090	0.023171	0.052537	-290.222	0.007078	0.027232	cpx	Na0.02Ca0.70Fe''0.29Mg0.88Fe'''0.04Ti0.00Al0.17Si1.90O6	51.3069	0.152801	3.90606	1.5404	0	9.31872	0	15.8825	17.6142	0.278387	0	0
2000	1089	0.022543	0.051088	-282.274	0.006885	0.026486	cpx	Na0.02Ca0.70Fe''0.29Mg0.87Fe'''0.04Ti0.00Al0.17Si1.90O6	51.2918	0.154855	3.90609	1.54724	0	9.35323	0	15.8448	17.6222	0.279733	0	0
2000	1088	0.021932	0.04968	-274.546	0.006697	0.02576	cpx	Na0.02Ca0.70Fe''0.29Mg0.87Fe'''0.04Ti0.00Al0.17Si1.90O6	51.2767	0.156933	3.90613	1.55413	0	9.38781	0	15.807	17.6303	0.281087	0	0
2000	1087	0.021338	0.048312	-267.032	0.006514	0.025054	cpx	Na0.02Ca0.70Fe''0.29Mg0.87Fe'''0.04Ti0.00Al0.17Si1.90O6	51.2614	0.159037	3.90618	1.56107	0	9.42247	0	15.769	17.6383	0.282447	0	0
2000	1086	0.02076	0.046981	-259.725	0.006336	0.024368	cpx	Na0.02Ca0.70Fe''0.29Mg0.87Fe'''0.04Ti0.00Al0.17Si1.90O6	51.2461	0.161165	3.90625	1.56804	0	9.45721	0	15.731	17.6464	0.283814	0	0
2000	1085	0.020198	0.045688	-252.621	0.006163	0.023701	cpx	Na0.02Ca0.70Fe''0.29Mg0.87Fe'''0.04Ti0.00Al0.17Si1.90O6	51.2307	0.163319	3.90634	1.57506	0	9.49203	0	15.6928	17.6545	0.285188	0	0
2000	1084	0.019652	0.04443	-245.712	0.005995	0.023052	cpx	Na0.02Ca0.70Fe''0.30Mg0.86Fe'''0.04Ti0.00Al0.17Si1.90O6	51.2153	0.165499	3.90644	1.58212	0	9.52694	0	15.6546	17.6626	0.28657	0	0
2000	1083	0.01912	0.043207	-238.994	0.005832	0.022421	cpx	Na0.02Ca0.70Fe''0.30Mg0.86Fe'''0.04Ti0.00Al0.17Si1.90O6	51.1997	0.167706	3.90656	1.58923	0	9.56194	0	15.6162	17.6707	0.287959	0	0
2000	1082	0.018603	0.042019	-232.461	0.005673	0.021807	cpx	Na0.02Ca0.70Fe''0.30Mg0.86Fe'''0.04Ti0.00Al0.17Si1.90O6	51.1841	0.169939	3.9067	1.59638	0	9.59702	0	15.5777	17.6788	0.289355	0	0
2000	1081	0.0181	0.040863	-226.109	0.005518	0.021211	cpx	Na0.02Ca0.70Fe''0.30Mg0.86Fe'''0.04Ti0.00Al0.17Si1.90O6	51.1684	0.172199	3.90685	1.60358	0	9.6322	0	15.5391	17.6869	0.290758	0	0
2000	1080	0.017611	0.039739	-219.931	0.005368	0.020631	cpx	Na0.02Ca0.70Fe''0.30Mg0.86Fe'''0.04Ti0.00Al0.17Si1.90O6	51.1526	0.174487	3.90702	1.61083	0	9.66746	0	15.5003	17.6951	0.292169	0	0
2000	1079	0.017135	0.038647	-213.924	0.005222	0.020067	cpx	Na0.02Ca0.70Fe''0.30Mg0.86Fe'''0.05Ti0.00Al0.17Si1.90O6	51.1368	0.176802	3.90721	1.61812	0	9.70283	0	15.4615	17.7032	0.293587	0	0
2000	1078	0.016672	0.037585	-208.082	0.00508	0.019518	cpx	Na0.02Ca0.70Fe''0.30Mg0.85Fe'''0.05Ti0.01Al0.17Si1.90O6	51.1208	0.179146	3.90741	1.62546	0	9.73829	0	15.4225	17.7114	0.295013	0	0
2000	1077	0.016222	0.036552	-202.401	0.004941	0.018985	cpx	Na0.02Ca0.70Fe''0.30Mg0.85Fe'''0.05Ti0.01Al0.17Si1.90O6	51.1048	0.181519	3.90763	1.63285	0	9.77385	0	15.3834	17.7195	0.296447	0	0
2000	1076	0.015784	0.035548	-196.877	0.004807	0.018466	cpx	Na0.02Ca0.71Fe''0.30Mg0.85Fe'''0.05Ti0.01Al0.17Si1.90O6	51.0886	0.183921	3.90787	1.6403	0	9.80951	0	15.3442	17.7277	0.297888	0	0
2000	1075	0.015358	0.034572	-191.505	0.004676	0.017962	cpx	Na0.02Ca0.71Fe''0.31Mg0.85Fe'''0.05Ti0.01Al0.17Si1.90O6	51.0724	0.186353	3.90813	1.64779	0	9.84527	0	15.3048	17.7358	0.299337	0	0
2000	1074	0.014944	0.033623	-186.281	0.004549	0.017472	cpx	Na0.02Ca0.71Fe''0.31Mg0.85Fe'''0.05Ti0.01Al0.17Si1.90O6	51.0561	0.188815	3.9084	1.65533	0	9.88114	0	15.2654	17.744	0.300793	0	0
2000	1073	0.014541	0.032701	-181.201	0.004425	0.016995	cpx	Na0.02Ca0.71Fe''0.31Mg0.84Fe'''0.05Ti0.01Al0.17Si1.90O6	51.0397	0.191307	3.90869	1.66293	0	9.91711	0	15.2258	17.7522	0.302258	0	0
2000	1072	0.014149	0.031804	-176.262	0.004305	0.016531	cpx	Na0.02Ca0.71Fe''0.31Mg0.84Fe'''0.05Ti0.01Al0.17Si1.90O6	51.0233	0.193831	3.90901	1.67058	0	9.9532	0	15.186	17.7603	0.303731	0	0
2000	1071	0.013768	0.030932	-171.459	0.004188	0.01608	cpx	Na0.02Ca0.71Fe''0.31Mg0.84Fe'''0.05Ti0.01Al0.17Si1.90O6	51.0067	0.196386	3.90934	1.67828	0	9.9894	0	15.1462	17.7685	0.305211	0	0
2000	1070	0.013397	0.030084	-166.788	0.004074	0.015642	cpx	Na0.02Ca0.71Fe''0.31Mg0.84Fe'''0.05Ti0.01Al0.17Si1.90O6	50.99	0.198973	3.90969	1.68604	0	10.0257	0	15.1062	17.7767	0.3067	0	0
2000	1069	0.013036	0.02926	-162.247	0.003964	0.015216	cpx	Na0.02Ca0.71Fe''0.31Mg0.84Fe'''0.05Ti0.01Al0.17Si1.90O6	50.9732	0.201593	3.91006	1.69386	0	10.0621	0	15.0661	17.7848	0.308197	0	0
2000	1068	0.012686	0.028459	-157.831	0.003856	0.014801	cpx	Na0.02Ca0.71Fe''0.31Mg0.83Fe'''0.05Ti0.01Al0.17Si1.90O6	50.9564	0.204246	3.91045	1.70173	0	10.0987	0	15.0258	17.793	0.309702	0	0
2000	1067	0.012344	0.02768	-153.538	0.003752	0.014399	cpx	Na0.02Ca0.71Fe''0.32Mg0.83Fe'''0.05Ti0.01Al0.17Si1.90O6	50.9394	0.206932	3.91086	1.70966	0	10.1354	0	14.9854	17.8012	0.311216	0	0
2000	1066	0.012013	0.026923	-149.364	0.00365	0.014007	cpx	Na0.02Ca0.71Fe''0.32Mg0.83Fe'''0.05Ti0.01Al0.17Si1.90O6	50.9223	0.209652	3.91129	1.71765	0	10.1721	0	14.9449	17.8093	0.312738	0	0
2000	1065	0.01169	0.026187	-145.306	0.003551	0.013626	cpx	Na0.02Ca0.71Fe''0.32Mg0.83Fe'''0.05Ti0.01Al0.17Si1.90O6	50.9052	0.212407	3.91174	1.72569	0	10.2091	0	14.9042	17.8174	0.314269	0	0
2000	1064	0.011377	0.025472	-141.36	0.003455	0.013256	cpx	Na0.02Ca0.71Fe''0.32Mg0.83Fe'''0.05Ti0.01Al0.17Si1.90O6	50.8879	0.215197	3.91221	1.7338	0	10.2461	0	14.8634	17.8256	0.315808	0	0
2000	1063	0.011071	0.024777	-137.525	0.003362	0.012896	cpx	Na0.02Ca0.71Fe''0.32Mg0.82Fe'''0.05Ti0.01Al0.17Si1.90O6	50.8705	0.218023	3.91271	1.74197	0	10.2833	0	14.8224	17.8337	0.317356	0	0
2000	1062	0.010775	0.024101	-133.796	0.003271	0.012546	cpx	Na0.02Ca0.71Fe''0.32Mg0.82Fe'''0.05Ti0.01Al0.17Si1.89O6	50.853	0.220886	3.91322	1.7502	0	10.3206	0	14.7813	17.8418	0.318912	0	0
2000	1061	0.010487	0.023445	-130.172	0.003183	0.012206	cpx	Na0.02Ca0.71Fe''0.32Mg0.82Fe'''0.05Ti0.01Al0.17Si1.89O6	50.8354	0.223785	3.91376	1.7585	0	10.358	0	14.7401	17.8499	0.320478	0	0
2000	1060	0.010206	0.022806	-126.649	0.003097	0.011876	cpx	Na0.02Ca0.71Fe''0.32Mg0.82Fe'''0.05Ti0.01Al0.17Si1.89O6	50.8177	0.226721	3.91432	1.76686	0	10.3956	0	14.6987	17.858	0.322052	0	0
2000	1059	0.009934	0.022186	-123.224	0.003013	0.011554	cpx	Na0.02Ca0.71Fe''0.33Mg0.81Fe'''0.05Ti0.01Al0.17Si1.89O6	50.7999	0.229696	3.9149	1.77528	0	10.4333	0	14.6572	17.8661	0.323635	0	0
2000	1058	0.009669	0.021584	-119.896	0.002932	0.011242	cpx	Na0.02Ca0.71Fe''0.33Mg0.81Fe'''0.05Ti0.01Al0.17Si1.89O6	50.7819	0.23271	3.91551	1.78378	0	10.4712	0	14.6155	17.8742	0.325228	0	0
2000	1057	0.009411	0.020998	-116.662	0.002854	0.010939	cpx	Na0.02Ca0.71Fe''0.33Mg0.81Fe'''0.05Ti0.01Al0.17Si1.89O6	50.7639	0.235763	3.91614	1.79233	0	10.5092	0	14.5736	17.8823	0.326829	0	0
2000	1056	0.009161	0.020429	-113.519	0.002777	0.010644	cpx	Na0.02Ca0.72Fe''0.33Mg0.81Fe'''0.05Ti0.01Al0.17Si1.89O6	50.7457	0.238856	3.91679	1.80096	0	10.5473	0	14.5316	17.8903	0.32844	0	0
2000	1055	0.008917	0.019877	-110.465	0.002703	0.010358	cpx	Na0.02Ca0.72Fe''0.33Mg0.81Fe'''0.05Ti0.01Al0.17Si1.89O6	50.7274	0.24199	3.91747	1.80966	0	10.5856	0	14.4895	17.8983	0.330061	0	0
2000	1054	0.008681	0.01934	-107.498	0.00263	0.010079	cpx	Na0.02Ca0.72Fe''0.33Mg0.80Fe'''0.05Ti0.01Al0.17Si1.89O6	50.709	0.245165	3.91817	1.81843	0	10.6241	0	14.4471	17.9064	0.33169	0	0
2000	1053	0.008451	0.018818	-104.615	0.00256	0.009809	cpx	Na0.02Ca0.72Fe''0.33Mg0.80Fe'''0.05Ti0.01Al0.17Si1.89O6	50.6905	0.248382	3.9189	1.82727	0	10.6627	0	14.4047	17.9144	0.33333	0	0
2000	1052	0.008228	0.018312	-101.815	0.002492	0.009546	cpx	Na0.02Ca0.72Fe''0.33Mg0.80Fe'''0.05Ti0.01Al0.17Si1.89O6	50.6718	0.251642	3.91965	1.83618	0	10.7014	0	14.362	17.9223	0.334979	0	0
2000	1051	0.008011	0.01782	-99.0943	0.002425	0.009291	cpx	Na0.02Ca0.72Fe''0.34Mg0.80Fe'''0.05Ti0.01Al0.17Si1.89O6	50.653	0.254946	3.92043	1.84517	0	10.7403	0	14.3192	17.9303	0.336638	0	0
2000	1050	0.0078	0.017342	-96.4521	0.002361	0.009043	cpx	Na0.02Ca0.72Fe''0.34Mg0.80Fe'''0.05Ti0.01Al0.17Si1.89O6	50.6341	0.258294	3.92123	1.85423	0	10.7794	0	14.2762	17.9382	0.338306	0	0
2000	1049	0.007595	0.016879	-93.886	0.002298	0.008803	cpx	Na0.02Ca0.72Fe''0.34Mg0.79Fe'''0.05Ti0.01Al0.17Si1.89O6	50.615	0.261686	3.92206	1.86337	0	10.8186	0	14.2331	17.9462	0.339985	0	0
2000	1048	0.007396	0.016428	-91.3942	0.002238	0.008569	cpx	Na0.02Ca0.72Fe''0.34Mg0.79Fe'''0.05Ti0.01Al0.17Si1.89O6	50.5958	0.265125	3.92292	1.87259	0	10.858	0	14.1898	17.9541	0.341673	0	0
2000	1047	0.007203	0.015991	-88.9747	0.002179	0.008342	cpx	Na0.02Ca0.72Fe''0.34Mg0.79Fe'''0.05Ti0.01Al0.17Si1.89O6	50.5765	0.26861	3.92381	1.88189	0	10.8976	0	14.1463	17.9619	0.343372	0	0
2000	1046	0.007015	0.015567	-86.6258	0.002121	0.008122	cpx	Na0.03Ca0.72Fe''0.34Mg0.79Fe'''0.05Ti0.01Al0.17Si1.89O6	50.557	0.272143	3.92472	1.89127	0	10.9373	0	14.1026	17.9698	0.345081	0	0
2000	1045	0.006833	0.015155	-84.3457	0.002066	0.007908	cpx	Na0.03Ca0.72Fe''0.34Mg0.78Fe'''0.05Ti0.01Al0.17Si1.89O6	50.5374	0.275724	3.92566	1.90073	0	10.9773	0	14.0588	17.9776	0.346801	0	0
2000	1044	0.006657	0.014755	-82.1327	0.002012	0.007701	cpx	Na0.03Ca0.72Fe''0.34Mg0.78Fe'''0.05Ti0.01Al0.17Si1.89O6	50.5177	0.279354	3.92664	1.91027	0	11.0173	0	14.0148	17.9855	0.34853	0	0
2000	1043	0.006485	0.014368	-79.985	0.00196	0.007499	cpx	Na0.03Ca0.72Fe''0.35Mg0.78Fe'''0.05Ti0.01Al0.17Si1.89O6	50.4978	0.283034	3.92764	1.9199	0	11.0576	0	13.9706	17.9932	0.350271	0	0
2000	1042	0.006318	0.013991	-77.9012	0.001909	0.007304	cpx	Na0.03Ca0.72Fe''0.35Mg0.78Fe'''0.05Ti0.01Al0.17Si1.89O6	50.4777	0.286764	3.92867	1.92961	0	11.0981	0	13.9262	18.001	0.352022	0	0
2000	1041	0.006157	0.013627	-75.8796	0.001859	0.007115	cpx	Na0.03Ca0.72Fe''0.35Mg0.78Fe'''0.05Ti0.01Al0.17Si1.89O6	50.4575	0.290547	3.92973	1.93941	0	11.1387	0	13.8816	18.0087	0.353784	0	0
2000	1040	0.006	0.013273	-73.9186	0.001812	0.006931	cpx	Na0.03Ca0.72Fe''0.35Mg0.77Fe'''0.05Ti0.01Al0.17Si1.89O6	50.4372	0.294382	3.93082	1.9493	0	11.1795	0	13.8368	18.0164	0.355557	0	0
2000	1039	0.005848	0.01293	-72.0168	0.001765	0.006752	cpx	Na0.03Ca0.72Fe''0.35Mg0.77Fe'''0.06Ti0.01Al0.17Si1.89O6	50.4167	0.298271	3.93194	1.95928	0	11.2205	0	13.7919	18.0241	0.357341	0	0
2000	1038	0.0057	0.012597	-70.1728	0.00172	0.00658	cpx	Na0.03Ca0.72Fe''0.35Mg0.77Fe'''0.06Ti0.01Al0.17Si1.89O6	50.396	0.302214	3.93309	1.96935	0	11.2617	0	13.7467	18.0318	0.359136	0	0
2000	1037	0.005557	0.012275	-68.3851	0.001677	0.006412	cpx	Na0.03Ca0.72Fe''0.35Mg0.77Fe'''0.06Ti0.01Al0.17Si1.89O6	50.3752	0.306213	3.93428	1.97952	0	11.3031	0	13.7014	18.0394	0.360942	0	0
2000	1036	0.005419	0.011962	-66.6523	0.001634	0.00625	cpx	Na0.03Ca0.73Fe''0.36Mg0.76Fe'''0.06Ti0.01Al0.17Si1.89O6	50.3542	0.310268	3.9355	1.98978	0	11.3446	0	13.6559	18.047	0.36276	0	0
2000	1035	0.005284	0.011659	-64.9732	0.001593	0.006092	cpx	Na0.03Ca0.73Fe''0.36Mg0.76Fe'''0.06Ti0.01Al0.17Si1.89O6	50.3331	0.314382	3.93675	2.00014	0	11.3864	0	13.6101	18.0545	0.364589	0	0
2000	1034	0.005154	0.011366	-63.3465	0.001554	0.00594	cpx	Na0.03Ca0.73Fe''0.36Mg0.76Fe'''0.06Ti0.01Al0.17Si1.89O6	50.3117	0.318553	3.93804	2.01059	0	11.4284	0	13.5642	18.0621	0.36643	0	0
2000	1033	0.005028	0.011082	-61.7708	0.001515	0.005792	cpx	Na0.03Ca0.73Fe''0.36Mg0.76Fe'''0.06Ti0.01Al0.17Si1.89O6	50.2902	0.322785	3.93936	2.02114	0	11.4706	0	13.518	18.0696	0.368282	0	0
2000	1032	0.004906	0.010807	-60.245	0.001478	0.005649	cpx	Na0.03Ca0.73Fe''0.36Mg0.75Fe'''0.06Ti0.01Al0.17Si1.89O6	50.2686	0.327078	3.94072	2.0318	0	11.513	0	13.4717	18.077	0.370147	0	0
2000	1031	0.004787	0.010541	-58.7679	0.001442	0.005511	cpx	Na0.03Ca0.73Fe''0.36Mg0.75Fe'''0.06Ti0.01Al0.17Si1.89O6	50.2467	0.331432	3.94211	2.04256	0	11.5556	0	13.4251	18.0845	0.372023	0	0
2000	1030	0.004673	0.010283	-57.3384	0.001407	0.005377	cpx	Na0.03Ca0.73Fe''0.36Mg0.75Fe'''0.06Ti0.01Al0.17Si1.89O6	50.2247	0.33585	3.94354	2.05342	0	11.5984	0	13.3783	18.0919	0.373912	0	0
2000	1029	0.004562	0.010034	-55.9552	0.001373	0.005247	cpx	Na0.03Ca0.73Fe''0.37Mg0.75Fe'''0.06Ti0.01Al0.17Si1.89O6	50.2025	0.340332	3.94501	2.06439	0	11.6414	0	13.3313	18.0992	0.375813	0	0
2000	1028	0.004455	0.009793	-54.6173	0.001341	0.005122	cpx	Na0.03Ca0.73Fe''0.37Mg0.74Fe'''0.06Ti0.01Al0.17Si1.89O6	50.1801	0.34488	3.94651	2.07547	0	11.6846	0	13.2841	18.1066	0.377726	0	0
2000	1027	0.004351	0.009561	-53.3238	0.001309	0.005001	cpx	Na0.03Ca0.73Fe''0.37Mg0.74Fe'''0.06Ti0.01Al0.18Si1.89O6	50.1576	0.349495	3.94805	2.08665	0	11.7281	0	13.2367	18.1139	0.379652	0	0
2000	1026	0.004421	0.009709	-54.1574	0.00133	0.005079	cpx	Na0.03Ca0.73Fe''0.37Mg0.74Fe'''0.06Ti0.01Al0.18Si1.89O6	50.1351	0.354094	3.9495	2.09784	0	11.7716	0	13.1893	18.1211	0.381583	0	0
2000	1025	0.004572	0.010035	-55.9823	0.001375	0.00525	cpx	Na0.03Ca0.73Fe''0.37Mg0.74Fe'''0.06Ti0.01Al0.18Si1.89O6	50.1128	0.358622	3.95078	2.10896	0	11.8151	0	13.142	18.1282	0.383512	0	0
2000	1024	0.004486	0.009841	-54.9023	0.001349	0.005149	cpx	Na0.03Ca0.73Fe''0.37Mg0.74Fe'''0.06Ti0.01Al0.18Si1.89O6	50.0904	0.363197	3.95206	2.12017	0	11.8589	0	13.0946	18.1353	0.385452	0	0
2000	1023	0.004397	0.009641	-53.7917	0.001321	0.005045	cpx	Na0.03Ca0.73Fe''0.37Mg0.73Fe'''0.06Ti0.01Al0.18Si1.89O6	50.0678	0.367823	3.95336	2.13148	0	11.9029	0	13.047	18.1423	0.387403	0	0
2000	1022	0.00431	0.009445	-52.7036	0.001295	0.004943	cpx	Na0.03Ca0.73Fe''0.38Mg0.73Fe'''0.06Ti0.01Al0.18Si1.89O6	50.045	0.3725	3.95468	2.14288	0	11.947	0	12.9992	18.1492	0.389366	0	0
2000	1021	0.004226	0.009256	-51.6537	0.001269	0.004845	cpx	Na0.03Ca0.73Fe''0.38Mg0.73Fe'''0.06Ti0.01Al0.18Si1.89O6	50.0222	0.377228	3.95601	2.15439	0	11.9915	0	12.9512	18.1562	0.39134	0	0
2000	1020	0.004145	0.009073	-50.6416	0.001245	0.00475	cpx	Na0.03Ca0.73Fe''0.38Mg0.73Fe'''0.06Ti0.01Al0.18Si1.88O6	49.9991	0.382006	3.95736	2.16599	0	12.0361	0	12.9031	18.163	0.393326	0	0
2000	1019	0.004067	0.008898	-49.6662	0.001221	0.004659	cpx	Na0.03Ca0.73Fe''0.38Mg0.72Fe'''0.06Ti0.01Al0.18Si1.88O6	49.9759	0.386834	3.95872	2.1777	0	12.081	0	12.8547	18.1698	0.395323	0	0
2000	1018	0.003992	0.008729	-48.7266	0.001198	0.004571	cpx	Na0.03Ca0.73Fe''0.38Mg0.72Fe'''0.06Ti0.01Al0.18Si1.88O6	49.9526	0.391711	3.9601	2.1895	0	12.1261	0	12.8061	18.1765	0.397332	0	0
2000	1017	0.003919	0.008566	-47.8219	0.001176	0.004486	cpx	Na0.03Ca0.74Fe''0.38Mg0.72Fe'''0.06Ti0.01Al0.18Si1.88O6	49.9291	0.396637	3.96148	2.20141	0	12.1714	0	12.7573	18.1832	0.399352	0	0
2000	1016	0.00385	0.008409	-46.951	0.001155	0.004405	cpx	Na0.03Ca0.74Fe''0.39Mg0.72Fe'''0.06Ti0.01Al0.18Si1.88O6	49.9054	0.401611	3.96288	2.21342	0	12.217	0	12.7084	18.1898	0.401383	0	0
2000	1015	0.003783	0.008259	-46.1132	0.001134	0.004326	cpx	Na0.03Ca0.74Fe''0.39Mg0.71Fe'''0.06Ti0.01Al0.18Si1.88O6	49.8817	0.406632	3.96428	2.22553	0	12.2629	0	12.6592	18.1964	0.403426	0	0
2000	1014	0.003718	0.008114	-45.3077	0.001115	0.004251	cpx	Na0.03Ca0.74Fe''0.39Mg0.71Fe'''0.06Ti0.01Al0.18Si1.88O6	49.8577	0.411697	3.96568	2.23774	0	12.3089	0	12.6099	18.2029	0.405479	0	0
2000	1013	0.003656	0.007975	-44.5339	0.001096	0.004178	cpx	Na0.03Ca0.74Fe''0.39Mg0.71Fe'''0.06Ti0.01Al0.18Si1.88O6	49.8336	0.416807	3.96709	2.25006	0	12.3553	0	12.5603	18.2093	0.407545	0	0
2000	1012	0.003597	0.007841	-43.7914	0.001078	0.004109	cpx	Na0.03Ca0.74Fe''0.39Mg0.70Fe'''0.06Ti0.01Al0.18Si1.88O6	49.8094	0.421959	3.9685	2.26247	0	12.4018	0	12.5106	18.2156	0.409621	0	0
2000	1011	0.00354	0.007713	-43.0801	0.00106	0.004042	cpx	Na0.03Ca0.74Fe''0.39Mg0.70Fe'''0.06Ti0.01Al0.18Si1.88O6	49.785	0.427151	3.96991	2.27499	0	12.4487	0	12.4607	18.2219	0.411708	0	0
2000	1010	0.003486	0.007591	-42.4	0.001044	0.003979	cpx	Na0.03Ca0.74Fe''0.40Mg0.70Fe'''0.07Ti0.01Al0.18Si1.88O6	49.7605	0.432381	3.97132	2.28761	0	12.4958	0	12.4105	18.2281	0.413807	0	0
2000	1009	0.003434	0.007475	-41.7522	0.001028	0.003918	cpx	Na0.03Ca0.74Fe''0.40Mg0.70Fe'''0.07Ti0.01Al0.18Si1.88O6	49.7359	0.437646	3.97272	2.30032	0	12.5431	0	12.3602	18.2342	0.415916	0	0
2000	1008	0.003386	0.007364	-41.1383	0.001013	0.003861	cpx	Na0.03Ca0.74Fe''0.40Mg0.69Fe'''0.07Ti0.01Al0.18Si1.88O6	49.7111	0.442942	3.9741	2.31313	0	12.5907	0	12.3098	18.2402	0.418035	0	0
2000	1007	0.00334	0.007261	-40.5617	0.000999	0.003807	cpx	Na0.03Ca0.74Fe''0.40Mg0.69Fe'''0.07Ti0.01Al0.18Si1.88O6	49.6863	0.448265	3.97546	2.32604	0	12.6386	0	12.2591	18.2461	0.420164	0	0
2000	1006	0.003298	0.007165	-40.0286	0.000986	0.003757	cpx	Na0.03Ca0.74Fe''0.40Mg0.69Fe'''0.07Ti0.01Al0.18Si1.88O6	49.6613	0.453607	3.97681	2.33904	0	12.6867	0	12.2083	18.2519	0.422304	0	0
2000	1005	0.00326	0.007079	-39.5505	0.000975	0.003712	cpx	Na0.03Ca0.74Fe''0.40Mg0.69Fe'''0.07Ti0.01Al0.18Si1.88O6	49.6362	0.45896	3.97811	2.35211	0	12.7352	0	12.1573	18.2577	0.424452	0	0
2000	1004	0.003228	0.007007	-39.1503	0.000965	0.003675	cpx	Na0.03Ca0.74Fe''0.41Mg0.68Fe'''0.07Ti0.01Al0.18Si1.88O6	49.6111	0.464311	3.97936	2.36527	0	12.7838	0	12.1062	18.2633	0.426608	0	0
2000	1003	0.003207	0.006958	-38.8782	0.000958	0.00365	cpx	Na0.03Ca0.74Fe''0.41Mg0.68Fe'''0.07Ti0.01Al0.18Si1.88O6	49.586	0.469633	3.98054	2.37847	0	12.8328	0	12.055	18.2688	0.42877	0	0
2000	1002	0.003208	0.006955	-38.8642	0.000958	0.003649	cpx	Na0.03Ca0.74Fe''0.41Mg0.68Fe'''0.07Ti0.01Al0.18Si1.88O6	49.561	0.474878	3.98157	2.39168	0	12.882	0	12.0038	18.2741	0.430934	0	0
2000	1001	0.003267	0.007079	-39.5586	0.000976	0.003714	cpx	Na0.03Ca0.74Fe''0.41Mg0.68Fe'''0.07Ti0.01Al0.18Si1.88O6	49.5364	0.479904	3.98231	2.40477	0	12.9314	0	11.9529	18.2792	0.433089	0	0
2000	1000	0.002274	0.004924	-27.5173	0.000679	0.002584	cpx	Na0.03Ca0.74Fe''0.41Mg0.67Fe'''0.07Ti0.01Al0.18Si1.88O6	49.5069	0.487085	3.98547	2.41995	0	12.982	0	11.8977	18.2854	0.435428	0	0
2000	999	0.006908	0.014952	-83.5673	0.002062	0.007847	cpx	Na0.03Ca0.74Fe''0.41Mg0.67Fe'''0.07Ti0.01Al0.18Si1.88O6	49.5019	0.483413	3.97625	2.42511	0	13.0284	0	11.8629	18.2852	0.43689	0	0
2000	998	0.008027	0.017367	-97.0817	0.002395	0.009117	cpx	Na0.03Ca0.74Fe''0.42Mg0.67Fe'''0.07Ti0.01Al0.18Si1.88O6	49.5036	0.476801	3.96367	2.42752	0	13.0736	0	11.8336	18.2831	0.438114	0	0
2000	997	0.007852	0.016978	-94.9255	0.002343	0.008914	cpx	Na0.03Ca0.74Fe''0.42Mg0.67Fe'''0.07Ti0.01Al0.18Si1.88O6	49.5051	0.470231	3.95114	2.42996	0	13.1189	0	11.8042	18.2811	0.439342	0	0
2000	996	0.007682	0.016603	-92.8461	0.002292	0.00872	cpx	Na0.03Ca0.74Fe''0.42Mg0.67Fe'''0.07Ti0.01Al0.18Si1.88O6	49.5066	0.463703	3.93865	2.43242	0	13.1644	0	11.7746	18.279	0.440575	0	0
2000	995	0.007519	0.016242	-90.8413	0.002243	0.008532	cpx	Na0.03Ca0.74Fe''0.42Mg0.67Fe'''0.07Ti0.01Al0.18Si1.88O6	49.5079	0.457218	3.92621	2.43492	0	13.2101	0	11.7449	18.2769	0.441813	0	0
2000	994	0.007362	0.015894	-88.9087	0.002195	0.00835	cpx	Na0.03Ca0.74Fe''0.42Mg0.66Fe'''0.07Ti0.01Al0.18Si1.88O6	49.5091	0.450774	3.91382	2.43744	0	13.2558	0	11.7151	18.2748	0.443055	0	0
2000	993	0.00721	0.015558	-87.0461	0.00215	0.008176	cpx	Na0.03Ca0.74Fe''0.42Mg0.66Fe'''0.07Ti0.01Al0.17Si1.88O6	49.5102	0.444371	3.90147	2.44	0	13.3017	0	11.6851	18.2727	0.444301	0	0
2000	992	0.007064	0.015235	-85.2516	0.002106	0.008008	cpx	Na0.03Ca0.74Fe''0.42Mg0.66Fe'''0.07Ti0.01Al0.17Si1.88O6	49.5113	0.43801	3.88917	2.44258	0	13.3478	0	11.6551	18.2706	0.445553	0	0
2000	991	0.006923	0.014924	-83.5229	0.002063	0.007846	cpx	Na0.03Ca0.74Fe''0.43Mg0.66Fe'''0.07Ti0.01Al0.17Si1.88O6	49.5121	0.43169	3.87691	2.4452	0	13.3939	0	11.6248	18.2685	0.446809	0	0
2000	990	0.006787	0.014624	-81.8582	0.002022	0.00769	cpx	Na0.03Ca0.74Fe''0.43Mg0.66Fe'''0.07Ti0.01Al0.17Si1.88O6	49.5129	0.425412	3.8647	2.44784	0	13.4402	0	11.5945	18.2663	0.448069	0	0
2000	989	0.006657	0.014335	-80.2555	0.001983	0.007539	cpx	Na0.03Ca0.74Fe''0.43Mg0.66Fe'''0.07Ti0.01Al0.17Si1.88O6	49.5136	0.419174	3.85252	2.45051	0	13.4867	0	11.564	18.2642	0.449335	0	0
2000	988	0.006531	0.014057	-78.7131	0.001945	0.007395	cpx	Na0.03Ca0.74Fe''0.43Mg0.65Fe'''0.07Ti0.01Al0.17Si1.88O6	49.5142	0.412976	3.84039	2.45321	0	13.5333	0	11.5334	18.262	0.450605	0	0
[truncated: 2,404 more rows]
[truncated: 1 more columns]
