# Supplementary material for: A 5-km-thick reservoir with > 380,000 km3 of magma within the ancient Earth's crust
Source: Sci Rep. 2022 Sep 19;12:15651. doi: 10.1038/s41598-022-19915-w (PMC9485162; doi:10.1038/s41598-022-19915-w)
Supplement: Supplementary file 16 — Supplementary Information 16. [file 41598_2022_19915_MOESM16_ESM.xlsx]

## Sheet: alphaMELTS_tbl
SupplTable S4B-2: Fractional crystallization of the mix O20R80
System	Thermodynamic	Data:
Pressure	Temperature	mass	F	phi	S	H	V	dVdP*10^6	dVdT*10^6	Cp	logfO2(absolute)	logfO2-QFM	rhol	rhos	viscosity	aH2O	chisqr
2000	1400	99.9932	1	1	296.829	-1.2154e+06	40.2539	-375.411	3424.87	149.391	-6.318	0	2.48406	0	1.994	0.098076	0
2000	1400	99.9932	1	1	296.829	-1.2154e+06	40.2539	-375.411	3424.87	149.391	-6.318	0	2.48406	0	1.994	0.098076	0
2000	1399	99.9932	1	1	296.74	-1.21555e+06	40.2505	-375.337	3424.72	149.391	-6.327	0	2.48427	0	1.997	0.098057	0
2000	1398	99.9932	1	1	296.651	-1.2157e+06	40.2471	-375.263	3424.56	149.391	-6.336	0	2.48448	0	2.001	0.0980381	0
2000	1397	99.9932	1	1	296.561	-1.21585e+06	40.2437	-375.189	3424.41	149.39	-6.345	0	2.48469	0	2.005	0.0980191	0
2000	1396	99.9932	1	1	296.472	-1.216e+06	40.2403	-375.115	3424.26	149.39	-6.353	0	2.4849	0	2.009	0.0980002	0
2000	1395	99.9932	1	1	296.382	-1.21615e+06	40.2369	-375.042	3424.11	149.389	-6.362	0	2.48511	0	2.013	0.0979813	0
2000	1394	99.9933	1	1	296.293	-1.2163e+06	40.2335	-374.968	3423.95	149.389	-6.371	0	2.48533	0	2.016	0.0979623	0
2000	1393	99.9933	1	1	296.203	-1.21645e+06	40.2301	-374.894	3423.8	149.389	-6.38	0	2.48554	0	2.02	0.0979434	0
2000	1392	99.9933	1	1	296.114	-1.2166e+06	40.2267	-374.82	3423.64	149.388	-6.388	0	2.48575	0	2.024	0.0979245	0
2000	1391	99.9933	1	1	296.024	-1.21675e+06	40.2232	-374.747	3423.49	149.388	-6.397	0	2.48596	0	2.028	0.0979056	0
2000	1390	99.9933	1	1	295.934	-1.21689e+06	40.2198	-374.673	3423.33	149.387	-6.406	0	2.48617	0	2.032	0.0978867	0
2000	1389	99.9933	1	1	295.844	-1.21704e+06	40.2164	-374.599	3423.17	149.387	-6.415	0	2.48638	0	2.036	0.0978678	0
2000	1388	99.9933	1	1	295.754	-1.21719e+06	40.213	-374.526	3423.02	149.387	-6.424	0	2.48659	0	2.04	0.0978489	0
2000	1387	99.9934	1	1	295.665	-1.21734e+06	40.2096	-374.452	3422.86	149.386	-6.433	0	2.4868	0	2.043	0.09783	0
2000	1386	99.9934	1	1	295.575	-1.21749e+06	40.2062	-374.378	3422.7	149.386	-6.442	0	2.48701	0	2.047	0.0978112	0
2000	1385	99.9934	1	1	295.485	-1.21764e+06	40.2028	-374.305	3422.54	149.385	-6.45	0	2.48723	0	2.051	0.0977923	0
2000	1384	99.9934	1	1	295.394	-1.21779e+06	40.1994	-374.231	3422.38	149.385	-6.459	0	2.48744	0	2.055	0.0977734	0
2000	1383	99.9934	1	1	295.304	-1.21794e+06	40.196	-374.158	3422.22	149.385	-6.468	0	2.48765	0	2.059	0.0977546	0
2000	1382	99.9934	1	1	295.214	-1.21809e+06	40.1926	-374.084	3422.06	149.384	-6.477	0	2.48786	0	2.063	0.0977357	0
2000	1381	99.9935	1	1	295.124	-1.21824e+06	40.1892	-374.011	3421.89	149.384	-6.486	0	2.48807	0	2.067	0.0977169	0
2000	1380	99.9935	1	1	295.034	-1.21839e+06	40.1857	-373.937	3421.73	149.383	-6.495	0	2.48828	0	2.071	0.097698	0
2000	1379	99.9935	1	1	294.943	-1.21854e+06	40.1823	-373.864	3421.57	149.383	-6.504	0	2.48849	0	2.075	0.0976792	0
2000	1378	99.9935	1	1	294.853	-1.21869e+06	40.1789	-373.79	3421.41	149.383	-6.513	0	2.4887	0	2.078	0.0976604	0
2000	1377	99.9935	1	1	294.762	-1.21884e+06	40.1755	-373.717	3421.24	149.382	-6.522	0	2.48892	0	2.082	0.0976415	0
2000	1376	99.9935	1	1	294.672	-1.21899e+06	40.1721	-373.643	3421.08	149.382	-6.531	0	2.48913	0	2.086	0.0976227	0
2000	1375	99.9936	1	1	294.581	-1.21914e+06	40.1687	-373.57	3420.91	149.381	-6.54	0	2.48934	0	2.09	0.0976039	0
2000	1374	99.9936	1	1	294.491	-1.21929e+06	40.1653	-373.497	3420.74	149.381	-6.549	0	2.48955	0	2.094	0.0975851	0
2000	1373	99.9936	1	1	294.4	-1.21944e+06	40.1619	-373.423	3420.58	149.381	-6.558	0	2.48976	0	2.098	0.0975663	0
2000	1372	99.9936	1	1	294.309	-1.21959e+06	40.1585	-373.35	3420.41	149.38	-6.567	0	2.48997	0	2.102	0.0975476	0
2000	1371	99.9936	1	1	294.218	-1.21974e+06	40.1551	-373.277	3420.24	149.38	-6.576	0	2.49018	0	2.106	0.0975288	0
2000	1370	99.9936	1	1	294.128	-1.21989e+06	40.1517	-373.203	3420.07	149.38	-6.585	0	2.4904	0	2.11	0.09751	0
2000	1369	99.9937	1	1	294.037	-1.22004e+06	40.1483	-373.13	3419.9	149.379	-6.594	0	2.49061	0	2.114	0.0974913	0
2000	1368	99.9937	1	1	293.946	-1.22019e+06	40.1449	-373.057	3419.73	149.379	-6.603	0	2.49082	0	2.118	0.0974725	0
2000	1367	99.9937	1	1	293.855	-1.22034e+06	40.1415	-372.984	3419.56	149.378	-6.612	0	2.49103	0	2.122	0.0974538	0
2000	1366	99.9937	1	1	293.764	-1.22049e+06	40.1381	-372.91	3419.39	149.378	-6.621	0	2.49124	0	2.126	0.097435	0
2000	1365	99.9937	1	1	293.673	-1.22063e+06	40.1347	-372.837	3419.22	149.378	-6.63	0	2.49146	0	2.13	0.0974163	0
2000	1364	99.9938	1	1	293.581	-1.22078e+06	40.1313	-372.764	3419.04	149.377	-6.64	0	2.49167	0	2.134	0.0973976	0
2000	1363	99.9938	1	1	293.49	-1.22093e+06	40.1279	-372.691	3418.87	149.377	-6.649	0	2.49188	0	2.138	0.0973789	0
2000	1362	99.9938	1	1	293.399	-1.22108e+06	40.1245	-372.618	3418.7	149.376	-6.658	0	2.49209	0	2.142	0.0973601	0
2000	1361	99.9938	1	1	293.308	-1.22123e+06	40.1211	-372.545	3418.52	149.376	-6.667	0	2.4923	0	2.146	0.0973415	0
2000	1360	99.9938	1	1	293.216	-1.22138e+06	40.1177	-372.472	3418.35	149.376	-6.676	0	2.49251	0	2.15	0.0973228	0
2000	1359	99.9938	1	1	293.125	-1.22153e+06	40.1143	-372.399	3418.17	149.375	-6.685	0	2.49273	0	2.154	0.0973041	0
2000	1358	99.9939	1	1	293.033	-1.22168e+06	40.1109	-372.326	3417.99	149.375	-6.694	0	2.49294	0	2.158	0.0972854	0
2000	1357	99.9939	1	1	292.942	-1.22183e+06	40.1075	-372.253	3417.82	149.375	-6.704	0	2.49315	0	2.162	0.0972668	0
2000	1356	99.9939	1	1	292.85	-1.22198e+06	40.1041	-372.18	3417.64	149.374	-6.713	0	2.49336	0	2.166	0.0972481	0
2000	1355	99.9939	1	1	292.758	-1.22213e+06	40.1007	-372.107	3417.46	149.374	-6.722	0	2.49357	0	2.17	0.0972295	0
2000	1354	99.9939	1	1	292.667	-1.22228e+06	40.0973	-372.034	3417.28	149.373	-6.731	0	2.49378	0	2.174	0.0972108	0
2000	1353	99.994	1	1	292.575	-1.22243e+06	40.0939	-371.961	3417.1	149.373	-6.741	0	2.494	0	2.178	0.0971922	0
2000	1352	99.994	1	1	292.483	-1.22258e+06	40.0905	-371.888	3416.92	149.373	-6.75	0	2.49421	0	2.182	0.0971736	0
2000	1351	99.994	1	1	292.391	-1.22273e+06	40.0871	-371.815	3416.74	149.372	-6.759	0	2.49442	0	2.186	0.097155	0
2000	1350	99.994	1	1	292.299	-1.22288e+06	40.0837	-371.742	3416.56	149.372	-6.768	0	2.49463	0	2.19	0.0971364	0
2000	1349	99.994	1	1	292.207	-1.22303e+06	40.0803	-371.669	3416.38	149.372	-6.778	0	2.49484	0	2.194	0.0971178	0
2000	1348	99.9941	1	1	292.115	-1.22318e+06	40.0769	-371.596	3416.2	149.371	-6.787	0	2.49506	0	2.198	0.0970992	0
2000	1347	99.9941	1	1	292.023	-1.22333e+06	40.0735	-371.524	3416.01	149.371	-6.796	0	2.49527	0	2.202	0.0970806	0
2000	1346	99.9941	1	1	291.931	-1.22348e+06	40.0701	-371.451	3415.83	149.371	-6.806	0	2.49548	0	2.206	0.0970621	0
2000	1345	99.9941	1	1	291.839	-1.22363e+06	40.0667	-371.378	3415.64	149.37	-6.815	0	2.49569	0	2.21	0.0970435	0
2000	1344	99.9942	1	1	291.746	-1.22378e+06	40.0633	-371.305	3415.46	149.37	-6.824	0	2.49591	0	2.214	0.097025	0
2000	1343	99.9942	1	1	291.654	-1.22393e+06	40.0599	-371.233	3415.27	149.369	-6.834	0	2.49612	0	2.218	0.0970064	0
2000	1342	99.9942	1	1	291.562	-1.22408e+06	40.0565	-371.16	3415.09	149.369	-6.843	0	2.49633	0	2.222	0.0969879	0
2000	1341	99.9942	1	1	291.469	-1.22423e+06	40.0531	-371.087	3414.9	149.369	-6.852	0	2.49654	0	2.226	0.0969694	0
2000	1340	99.9942	1	1	291.377	-1.22438e+06	40.0497	-371.015	3414.71	149.368	-6.862	0	2.49675	0	2.231	0.0969509	0
2000	1339	99.9943	1	1	291.284	-1.22453e+06	40.0463	-370.942	3414.52	149.368	-6.871	0	2.49697	0	2.235	0.0969324	0
2000	1338	99.9943	1	1	291.191	-1.22468e+06	40.0429	-370.869	3414.33	149.368	-6.88	0	2.49718	0	2.239	0.0969139	0
2000	1337	99.9943	1	1	291.099	-1.22483e+06	40.0395	-370.797	3414.14	149.367	-6.89	0	2.49739	0	2.243	0.0968954	0
2000	1336	99.9943	1	1	291.006	-1.22498e+06	40.0361	-370.724	3413.95	149.367	-6.899	0	2.4976	0	2.247	0.096877	0
2000	1335	99.9944	1	1	290.913	-1.22512e+06	40.0327	-370.652	3413.76	149.367	-6.909	0	2.49782	0	2.251	0.0968585	0
2000	1334	99.9944	1	1	290.82	-1.22527e+06	40.0293	-370.579	3413.57	149.366	-6.918	0	2.49803	0	2.255	0.0968401	0
2000	1333	99.9944	1	1	290.727	-1.22542e+06	40.026	-370.507	3413.38	149.366	-6.928	0	2.49824	0	2.259	0.0968217	0
2000	1332	99.9944	1	1	290.634	-1.22557e+06	40.0226	-370.434	3413.19	149.366	-6.937	0	2.49845	0	2.263	0.0968032	0
2000	1331	99.9945	1	1	290.541	-1.22572e+06	40.0192	-370.362	3412.99	149.365	-6.947	0	2.49866	0	2.268	0.0967848	0
2000	1330	99.9945	1	1	290.448	-1.22587e+06	40.0158	-370.289	3412.8	149.365	-6.956	0	2.49888	0	2.272	0.0967664	0
2000	1329	99.9945	1	1	290.355	-1.22602e+06	40.0124	-370.217	3412.61	149.364	-6.966	0	2.49909	0	2.276	0.0967481	0
2000	1328	99.9945	1	1	290.262	-1.22617e+06	40.009	-370.145	3412.41	149.364	-6.975	0	2.4993	0	2.28	0.0967297	0
2000	1327	99.9945	1	1	290.169	-1.22632e+06	40.0056	-370.072	3412.21	149.364	-6.985	0	2.49951	0	2.284	0.0967113	0
2000	1326	99.9946	1	1	290.075	-1.22647e+06	40.0022	-370	3412.02	149.363	-6.994	0	2.49973	0	2.288	0.096693	0
2000	1325	99.9946	1	1	289.982	-1.22662e+06	39.9988	-369.928	3411.82	149.363	-7.004	0	2.49994	0	2.293	0.0966746	0
2000	1324	99.9946	1	1	289.889	-1.22677e+06	39.9954	-369.855	3411.62	149.363	-7.013	0	2.50015	0	2.297	0.0966563	0
2000	1323	99.9946	1	1	289.795	-1.22692e+06	39.992	-369.783	3411.42	149.362	-7.023	0	2.50036	0	2.301	0.096638	0
2000	1322	99.9947	1	1	289.702	-1.22707e+06	39.9887	-369.711	3411.23	149.362	-7.033	0	2.50058	0	2.305	0.0966197	0
2000	1321	99.9947	1	1	289.608	-1.22722e+06	39.9853	-369.639	3411.03	149.362	-7.042	0	2.50079	0	2.309	0.0966014	0
2000	1320	99.9947	1	1	289.514	-1.22737e+06	39.9819	-369.566	3410.83	149.361	-7.052	0	2.501	0	2.314	0.0965831	0
2000	1319	99.9947	1	1	289.421	-1.22752e+06	39.9785	-369.494	3410.63	149.361	-7.062	0	2.50121	0	2.318	0.0965648	0
2000	1318	99.9948	1	1	289.327	-1.22767e+06	39.9751	-369.422	3410.42	149.361	-7.071	0	2.50143	0	2.322	0.0965466	0
2000	1317	99.9948	1	1	289.233	-1.22782e+06	39.9717	-369.35	3410.22	149.36	-7.081	0	2.50164	0	2.326	0.0965283	0
2000	1316	99.9948	1	1	289.139	-1.22797e+06	39.9683	-369.278	3410.02	149.36	-7.09	0	2.50185	0	2.33	0.0965101	0
2000	1315	99.9949	1	1	289.045	-1.22812e+06	39.9649	-369.206	3409.82	149.36	-7.1	0	2.50206	0	2.335	0.0964919	0
2000	1314	99.9949	1	1	288.951	-1.22827e+06	39.9616	-369.134	3409.61	149.359	-7.11	0	2.50228	0	2.339	0.0964737	0
2000	1313	99.9949	1	1	288.857	-1.22842e+06	39.9582	-369.062	3409.41	149.359	-7.12	0	2.50249	0	2.343	0.0964555	0
2000	1312	99.9949	1	1	288.763	-1.22857e+06	39.9548	-368.99	3409.2	149.359	-7.129	0	2.5027	0	2.347	0.0964373	0
2000	1311	99.995	1	1	288.669	-1.22872e+06	39.9514	-368.918	3409	149.358	-7.139	0	2.50291	0	2.352	0.0964191	0
2000	1310	99.995	1	1	288.574	-1.22887e+06	39.948	-368.846	3408.79	149.358	-7.149	0	2.50313	0	2.356	0.096401	0
2000	1309	99.995	1	1	288.48	-1.22902e+06	39.9446	-368.774	3408.58	149.358	-7.159	0	2.50334	0	2.36	0.0963829	0
2000	1308	99.995	1	1	288.386	-1.22917e+06	39.9412	-368.702	3408.38	149.357	-7.168	0	2.50355	0	2.364	0.0963647	0
2000	1307	99.9951	1	1	288.291	-1.22932e+06	39.9379	-368.63	3408.17	149.357	-7.178	0	2.50377	0	2.369	0.0963466	0
2000	1306	99.9951	1	1	288.197	-1.22947e+06	39.9345	-368.558	3407.96	149.357	-7.188	0	2.50398	0	2.373	0.0963285	0
2000	1305	99.9951	1	1	288.102	-1.22962e+06	39.9311	-368.486	3407.75	149.356	-7.198	0	2.50419	0	2.377	0.0963104	0
2000	1304	99.9952	1	1	288.008	-1.22977e+06	39.9277	-368.414	3407.54	149.356	-7.208	0	2.50441	0	2.381	0.0962924	0
2000	1303	99.9952	1	1	287.913	-1.22992e+06	39.9243	-368.342	3407.33	149.356	-7.217	0	2.50462	0	2.386	0.0962743	0
2000	1302	99.9952	1	1	287.818	-1.23007e+06	39.9209	-368.271	3407.12	149.356	-7.227	0	2.50483	0	2.39	0.0962563	0
2000	1301	99.9952	1	1	287.724	-1.23022e+06	39.9176	-368.199	3406.91	149.355	-7.237	0	2.50504	0	2.394	0.0962382	0
2000	1300	99.9953	1	1	287.629	-1.23037e+06	39.9142	-368.127	3406.69	149.355	-7.247	0	2.50526	0	2.399	0.0962202	0
2000	1299	99.9953	1	1	287.534	-1.23052e+06	39.9108	-368.055	3406.48	149.355	-7.257	0	2.50547	0	2.403	0.0962022	0
2000	1298	99.9953	1	1	287.439	-1.23067e+06	39.9074	-367.984	3406.27	149.354	-7.267	0	2.50568	0	2.407	0.0961842	0
2000	1297	99.9954	1	1	287.344	-1.23081e+06	39.904	-367.912	3406.05	149.354	-7.277	0	2.5059	0	2.412	0.0961662	0
2000	1296	99.9954	1	1	287.249	-1.23096e+06	39.9007	-367.84	3405.84	149.354	-7.287	0	2.50611	0	2.416	0.0961483	0
2000	1295	99.9954	1	1	287.154	-1.23111e+06	39.8973	-367.769	3405.62	149.353	-7.296	0	2.50632	0	2.42	0.0961303	0
2000	1294	99.9955	1	1	287.058	-1.23126e+06	39.8939	-367.697	3405.4	149.353	-7.306	0	2.50653	0	2.425	0.0961124	0
2000	1293	99.9955	1	1	286.963	-1.23141e+06	39.8905	-367.626	3405.19	149.353	-7.316	0	2.50675	0	2.429	0.0960945	0
2000	1292	99.9955	1	1	286.868	-1.23156e+06	39.8871	-367.554	3404.97	149.352	-7.326	0	2.50696	0	2.433	0.0960766	0
2000	1291	99.9955	1	1	286.772	-1.23171e+06	39.8838	-367.482	3404.75	149.352	-7.336	0	2.50717	0	2.438	0.0960587	0
2000	1290	99.9956	1	1	286.677	-1.23186e+06	39.8804	-367.411	3404.53	149.352	-7.346	0	2.50739	0	2.442	0.0960409	0
2000	1289	99.9956	1	1	286.581	-1.23201e+06	39.877	-367.339	3404.31	149.351	-7.356	0	2.5076	0	2.446	0.096023	0
2000	1288	99.9956	1	1	286.486	-1.23216e+06	39.8736	-367.268	3404.09	149.351	-7.366	0	2.50781	0	2.451	0.0960052	0
2000	1287	99.9957	1	1	286.39	-1.23231e+06	39.8703	-367.197	3403.87	149.351	-7.376	0	2.50803	0	2.455	0.0959873	0
2000	1286	99.9957	1	1	286.294	-1.23246e+06	39.8669	-367.125	3403.65	149.351	-7.386	0	2.50824	0	2.459	0.0959695	0
2000	1285	99.9957	1	1	286.199	-1.23261e+06	39.8635	-367.054	3403.43	149.35	-7.396	0	2.50845	0	2.464	0.0959517	0
2000	1284	99.9958	1	1	286.103	-1.23276e+06	39.8601	-366.982	3403.21	149.35	-7.407	0	2.50867	0	2.468	0.095934	0
2000	1283	99.9958	1	1	286.007	-1.23291e+06	39.8568	-366.911	3402.98	149.35	-7.417	0	2.50888	0	2.473	0.0959162	0
2000	1282	99.9958	1	1	285.911	-1.23306e+06	39.8534	-366.84	3402.76	149.349	-7.427	0	2.50909	0	2.477	0.0958985	0
2000	1281	99.9959	1	1	285.815	-1.23321e+06	39.85	-366.768	3402.54	149.349	-7.437	0	2.50931	0	2.481	0.0958808	0
2000	1280	99.9959	1	1	285.719	-1.23336e+06	39.8466	-366.697	3402.31	149.349	-7.447	0	2.50952	0	2.486	0.095863	0
2000	1279	99.9959	1	1	285.623	-1.23351e+06	39.8433	-366.626	3402.09	149.349	-7.457	0	2.50973	0	2.49	0.0958454	0
2000	1278	99.996	1	1	285.527	-1.23366e+06	39.8399	-366.555	3401.86	149.348	-7.467	0	2.50995	0	2.495	0.0958277	0
2000	1277	99.996	1	1	285.431	-1.23381e+06	39.8365	-366.483	3401.63	149.348	-7.477	0	2.51016	0	2.499	0.09581	0
2000	1276	99.996	1	1	285.334	-1.23396e+06	39.8331	-366.412	3401.41	149.348	-7.488	0	2.51037	0	2.504	0.0957924	0
2000	1275	99.9961	1	1	285.238	-1.23411e+06	39.8298	-366.341	3401.18	149.347	-7.498	0	2.51059	0	2.508	0.0957748	0
2000	1274	99.9961	1	1	285.141	-1.23426e+06	39.8264	-366.27	3400.95	149.347	-7.508	0	2.5108	0	2.512	0.0957572	0
2000	1273	99.9961	1	1	285.045	-1.23441e+06	39.823	-366.199	3400.72	149.347	-7.518	0	2.51101	0	2.517	0.0957396	0
2000	1272	99.9962	1	1	284.948	-1.23456e+06	39.8197	-366.128	3400.49	149.346	-7.528	0	2.51123	0	2.521	0.095722	0
2000	1271	99.9962	1	1	284.852	-1.23471e+06	39.8163	-366.057	3400.26	149.346	-7.539	0	2.51144	0	2.526	0.0957044	0
2000	1270	99.9962	1	1	284.755	-1.23486e+06	39.8129	-365.986	3400.03	149.346	-7.549	0	2.51165	0	2.53	0.0956869	0
2000	1269	99.9963	1	1	284.658	-1.23501e+06	39.8096	-365.914	3399.8	149.346	-7.559	0	2.51187	0	2.535	0.0956694	0
2000	1268	99.9963	1	1	284.562	-1.23516e+06	39.8062	-365.843	3399.57	149.345	-7.57	0	2.51208	0	2.539	0.0956519	0
2000	1267	99.9963	1	1	284.465	-1.23531e+06	39.8028	-365.773	3399.33	149.345	-7.58	0	2.51229	0	2.544	0.0956344	0
2000	1266	99.9964	1	1	284.368	-1.23546e+06	39.7994	-365.702	3399.1	149.345	-7.59	0	2.51251	0	2.548	0.095617	0
2000	1265	99.9964	1	1	284.271	-1.23561e+06	39.7961	-365.631	3398.87	149.345	-7.6	0	2.51272	0	2.553	0.0955995	0
2000	1264	99.9965	1	1	284.174	-1.23576e+06	39.7927	-365.56	3398.63	149.344	-7.611	0	2.51293	0	2.557	0.0955821	0
2000	1263	99.9965	1	1	284.077	-1.23591e+06	39.7893	-365.489	3398.4	149.344	-7.621	0	2.51315	0	2.562	0.0955647	0
2000	1262	99.9965	1	1	283.979	-1.23606e+06	39.786	-365.418	3398.16	149.344	-7.632	0	2.51336	0	2.566	0.0955473	0
2000	1261	99.9966	1	1	283.882	-1.23621e+06	39.7826	-365.347	3397.92	149.343	-7.642	0	2.51357	0	2.571	0.0955299	0
2000	1260	99.9966	1	1	283.785	-1.23636e+06	39.7792	-365.276	3397.69	149.343	-7.652	0	2.51379	0	2.575	0.0955126	0
2000	1259	99.9966	1	1	283.687	-1.23651e+06	39.7759	-365.206	3397.45	149.343	-7.663	0	2.514	0	2.58	0.0954952	0
2000	1258	99.9967	1	1	283.59	-1.23666e+06	39.7725	-365.135	3397.21	149.343	-7.673	0	2.51422	0	2.584	0.0954779	0
2000	1257	99.9967	1	1	283.493	-1.23681e+06	39.7692	-365.064	3396.97	149.342	-7.684	0	2.51443	0	2.589	0.0954606	0
2000	1256	99.9967	1	1	283.395	-1.23696e+06	39.7658	-364.993	3396.73	149.342	-7.694	0	2.51464	0	2.594	0.0954434	0
2000	1255	99.9968	1	1	283.297	-1.23711e+06	39.7624	-364.923	3396.49	149.342	-7.704	0	2.51486	0	2.598	0.0954261	0
2000	1254	99.9968	1	1	283.2	-1.23726e+06	39.7591	-364.852	3396.25	149.342	-7.715	0	2.51507	0	2.603	0.0954089	0
2000	1253	99.9969	1	1	283.102	-1.23741e+06	39.7557	-364.781	3396.01	149.341	-7.725	0	2.51528	0	2.607	0.0953917	0
2000	1252	99.9969	1	1	283.004	-1.23756e+06	39.7523	-364.711	3395.77	149.341	-7.736	0	2.5155	0	2.612	0.0953745	0
2000	1251	99.9969	1	1	282.906	-1.23771e+06	39.749	-364.64	3395.52	149.341	-7.746	0	2.51571	0	2.616	0.0953573	0
2000	1250	99.997	1	1	282.808	-1.23786e+06	39.7456	-364.57	3395.28	149.341	-7.757	0	2.51593	0	2.621	0.0953402	0
2000	1249	99.997	1	1	282.71	-1.23801e+06	39.7422	-364.499	3395.04	149.34	-7.767	0	2.51614	0	2.626	0.095323	0
2000	1248	99.9971	1	1	282.612	-1.23816e+06	39.7389	-364.429	3394.79	149.34	-7.778	0	2.51635	0	2.63	0.0953059	0
2000	1247	99.9971	1	1	282.514	-1.23831e+06	39.7355	-364.358	3394.55	149.34	-7.789	0	2.51657	0	2.635	0.0952888	0
2000	1246	99.9971	1	1	282.416	-1.23846e+06	39.7322	-364.288	3394.3	149.34	-7.799	0	2.51678	0	2.639	0.0952718	0
2000	1245	99.9972	1	1	282.318	-1.23861e+06	39.7288	-364.217	3394.06	149.339	-7.81	0	2.51699	0	2.644	0.0952547	0
2000	1244	99.9972	1	1	282.219	-1.23876e+06	39.7255	-364.147	3393.81	149.339	-7.82	0	2.51721	0	2.649	0.0952377	0
2000	1243	99.9973	1	1	282.121	-1.23891e+06	39.7221	-364.076	3393.56	149.339	-7.831	0	2.51742	0	2.653	0.0952207	0
2000	1242	99.9973	1	1	282.023	-1.23906e+06	39.7187	-364.006	3393.31	149.339	-7.842	0	2.51764	0	2.658	0.0952037	0
2000	1241	99.9973	1	1	281.924	-1.23921e+06	39.7154	-363.936	3393.06	149.338	-7.852	0	2.51785	0	2.663	0.0951867	0
2000	1240	99.9974	1	1	281.825	-1.23936e+06	39.712	-363.865	3392.81	149.338	-7.863	0	2.51806	0	2.667	0.0951698	0
2000	1239	99.9974	1	1	281.727	-1.23951e+06	39.7087	-363.795	3392.56	149.338	-7.874	0	2.51828	0	2.672	0.0951529	0
2000	1238	99.9975	1	1	281.628	-1.23966e+06	39.7053	-363.725	3392.31	149.338	-7.884	0	2.51849	0	2.677	0.095136	0
2000	1237	99.9975	1	1	281.529	-1.23981e+06	39.7019	-363.655	3392.06	149.337	-7.895	0	2.51871	0	2.681	0.0951191	0
2000	1236	99.9975	1	1	281.43	-1.23996e+06	39.6986	-363.584	3391.81	149.337	-7.906	0	2.51892	0	2.686	0.0951023	0
2000	1235	99.9976	1	1	281.332	-1.24011e+06	39.6952	-363.514	3391.56	149.337	-7.917	0	2.51913	0	2.691	0.0950854	0
2000	1234	99.9976	1	1	281.233	-1.24026e+06	39.6919	-363.444	3391.31	149.337	-7.927	0	2.51935	0	2.695	0.0950686	0
2000	1233	99.9977	1	1	281.134	-1.24041e+06	39.6885	-363.374	3391.05	149.336	-7.938	0	2.51956	0	2.7	0.0950519	0
2000	1232	99.9977	1	1	281.034	-1.24056e+06	39.6852	-363.304	3390.8	149.336	-7.949	0	2.51978	0	2.705	0.0950351	0
2000	1231	99.9978	1	1	280.935	-1.24071e+06	39.6818	-363.234	3390.54	149.336	-7.96	0	2.51999	0	2.709	0.0950184	0
2000	1230	99.9978	1	1	280.836	-1.24086e+06	39.6785	-363.164	3390.29	149.336	-7.97	0	2.5202	0	2.714	0.0950017	0
2000	1229	99.9978	1	1	280.737	-1.24101e+06	39.6751	-363.094	3390.03	149.335	-7.981	0	2.52042	0	2.719	0.094985	0
2000	1228	99.9979	1	1	280.637	-1.24116e+06	39.6718	-363.024	3389.78	149.335	-7.992	0	2.52063	0	2.724	0.0949683	0
2000	1227	99.9979	1	1	280.538	-1.24131e+06	39.6684	-362.954	3389.52	149.335	-8.003	0	2.52085	0	2.728	0.0949517	0
2000	1226	99.998	1	1	280.438	-1.24146e+06	39.6651	-362.884	3389.26	149.335	-8.014	0	2.52106	0	2.733	0.094935	0
2000	1225	99.998	1	1	280.339	-1.24161e+06	39.6617	-362.814	3389	149.334	-8.025	0	2.52127	0	2.738	0.0949185	0
2000	1224	99.9981	1	1	280.239	-1.24176e+06	39.6584	-362.744	3388.74	149.334	-8.036	0	2.52149	0	2.743	0.0949019	0
2000	1223	99.9981	1	1	280.14	-1.24191e+06	39.655	-362.674	3388.48	149.334	-8.047	0	2.5217	0	2.747	0.0948853	0
2000	1222	99.9982	1	1	280.04	-1.24206e+06	39.6517	-362.604	3388.22	149.334	-8.057	0	2.52192	0	2.752	0.0948688	0
2000	1221	99.9982	1	1	279.94	-1.24221e+06	39.6483	-362.534	3387.96	149.334	-8.068	0	2.52213	0	2.757	0.0948523	0
2000	1220	99.9982	1	1	279.84	-1.24236e+06	39.645	-362.465	3387.7	149.333	-8.079	0	2.52235	0	2.762	0.0948359	0
2000	1219	99.9983	1	1	279.74	-1.24251e+06	39.6416	-362.395	3387.44	149.333	-8.09	0	2.52256	0	2.766	0.0948194	0
2000	1218	99.9983	1	1	279.64	-1.24266e+06	39.6383	-362.325	3387.18	149.333	-8.101	0	2.52277	0	2.771	0.094803	0
2000	1217	99.9984	1	1	279.54	-1.24281e+06	39.6349	-362.255	3386.91	149.333	-8.112	0	2.52299	0	2.776	0.0947866	0
2000	1216	99.9984	1	1	279.44	-1.24296e+06	39.6316	-362.186	3386.65	149.333	-8.123	0	2.5232	0	2.781	0.0947702	0
2000	1215	99.9985	1	1	279.34	-1.24311e+06	39.6282	-362.116	3386.38	149.332	-8.134	0	2.52342	0	2.786	0.0947539	0
2000	1214	99.9985	1	1	279.239	-1.24326e+06	39.6249	-362.046	3386.12	149.332	-8.145	0	2.52363	0	2.791	0.0947376	0
2000	1213	99.9986	1	1	279.139	-1.24341e+06	39.6215	-361.977	3385.85	149.332	-8.156	0	2.52385	0	2.795	0.0947213	0
2000	1212	99.9986	1	1	279.039	-1.24356e+06	39.6182	-361.907	3385.59	149.332	-8.168	0	2.52406	0	2.8	0.094705	0
2000	1211	99.9987	1	1	278.938	-1.24371e+06	39.6148	-361.837	3385.32	149.331	-8.179	0	2.52427	0	2.805	0.0946888	0
2000	1210	99.9987	1	1	278.838	-1.24386e+06	39.6115	-361.768	3385.05	149.331	-8.19	0	2.52449	0	2.81	0.0946726	0
2000	1209	99.9988	1	1	278.737	-1.24401e+06	39.6082	-361.698	3384.79	149.331	-8.201	0	2.5247	0	2.815	0.0946564	0
2000	1208	99.9988	1	1	278.636	-1.24416e+06	39.6048	-361.629	3384.52	149.331	-8.212	0	2.52492	0	2.82	0.0946403	0
2000	1207	99.9989	1	1	278.535	-1.24431e+06	39.6015	-361.559	3384.25	149.331	-8.223	0	2.52513	0	2.824	0.0946241	0
2000	1206	99.9989	1	1	278.437	-1.24445e+06	39.5981	-361.49	3383.98	144.62	-8.234	0	2.52535	0	2.829	0.094608	0
2000	1205	99.999	1	1	278.34	-1.2446e+06	39.5948	-361.421	3383.71	144.619	-8.245	0	2.52556	0	2.834	0.094592	0
2000	1204	99.999	1	1	278.242	-1.24474e+06	39.5914	-361.351	3383.44	144.618	-8.257	0	2.52577	0	2.839	0.0945759	0
2000	1203	99.9991	1	1	278.144	-1.24489e+06	39.5881	-361.282	3383.16	144.617	-8.268	0	2.52599	0	2.844	0.0945599	0
2000	1202	99.9991	1	1	278.046	-1.24503e+06	39.5848	-361.213	3382.89	144.615	-8.279	0	2.5262	0	2.849	0.0945439	0
2000	1201	99.9992	1	1	277.948	-1.24518e+06	39.5814	-361.143	3382.62	144.614	-8.29	0	2.52642	0	2.854	0.094528	0
2000	1200	99.9992	1	1	277.85	-1.24532e+06	39.5781	-361.074	3382.35	144.613	-8.302	0	2.52663	0	2.859	0.094512	0
2000	1199	99.9993	1	1	277.752	-1.24547e+06	39.5747	-361.005	3382.07	144.611	-8.313	0	2.52685	0	2.864	0.0944961	0
2000	1198	99.9993	1	1	277.654	-1.24562e+06	39.5714	-360.935	3381.8	144.61	-8.324	0	2.52706	0	2.868	0.0944802	0
2000	1197	99.9994	1	1	277.555	-1.24576e+06	39.5681	-360.866	3381.52	144.608	-8.335	0	2.52727	0	2.873	0.0944644	0
2000	1196	99.9994	1	1	277.457	-1.24591e+06	39.5647	-360.797	3381.25	144.607	-8.347	0	2.52749	0	2.878	0.0944486	0
2000	1195	99.9995	1	1	277.359	-1.24605e+06	39.5614	-360.728	3380.97	144.606	-8.358	0	2.5277	0	2.883	0.0944328	0
2000	1194	99.9995	1	1	277.26	-1.2462e+06	39.558	-360.659	3380.69	144.604	-8.369	0	2.52792	0	2.888	0.094417	0
2000	1193	99.9996	1	1	277.162	-1.24634e+06	39.5547	-360.59	3380.41	144.603	-8.381	0	2.52813	0	2.893	0.0944013	0
2000	1192	99.9996	1	1	277.063	-1.24649e+06	39.5514	-360.521	3380.14	144.602	-8.392	0	2.52835	0	2.898	0.0943856	0
2000	1191	99.9997	1	1	276.965	-1.24663e+06	39.548	-360.452	3379.86	144.6	-8.404	0	2.52856	0	2.903	0.0943699	0
2000	1190	99.9997	1	1	276.866	-1.24678e+06	39.5447	-360.383	3379.58	144.599	-8.415	0	2.52878	0	2.908	0.0943543	0
2000	1189	99.9998	1	1	276.767	-1.24692e+06	39.5414	-360.314	3379.3	144.597	-8.426	0	2.52899	0	2.913	0.0943387	0
2000	1188	99.9998	1	1	276.668	-1.24707e+06	39.538	-360.245	3379.02	144.596	-8.438	0	2.52921	0	2.918	0.0943231	0
2000	1187	99.9999	1	1	276.569	-1.24721e+06	39.5347	-360.176	3378.74	144.595	-8.449	0	2.52942	0	2.923	0.0943076	0
2000	1186	99.9999	1	1	276.471	-1.24736e+06	39.5314	-360.107	3378.45	144.593	-8.461	0	2.52963	0	2.928	0.0942921	0
2000	1185	100	1	1	276.371	-1.24751e+06	39.528	-360.038	3378.17	144.592	-8.472	0	2.52985	0	2.933	0.0942766	0
2000	1184	100	1	1	276.272	-1.24765e+06	39.5247	-359.969	3377.89	144.59	-8.484	0	2.53006	0	2.938	0.0942611	0
2000	1183	100	1	1	276.173	-1.2478e+06	39.5214	-359.9	3377.61	144.589	-8.495	0	2.53028	0	2.943	0.0942457	0
2000	1182	100	1	1	276.074	-1.24794e+06	39.518	-359.832	3377.32	144.587	-8.507	0	2.53049	0	2.948	0.0942303	0
2000	1181	100	1	1	275.975	-1.24809e+06	39.5147	-359.763	3377.04	144.586	-8.518	0	2.53071	0	2.953	0.0942149	0
2000	1180	100	1	1	275.875	-1.24823e+06	39.5114	-359.694	3376.75	144.585	-8.53	0	2.53092	0	2.958	0.0941996	0
2000	1179	100	1	1	275.776	-1.24838e+06	39.5081	-359.625	3376.46	144.583	-8.542	0	2.53114	0	2.963	0.0941843	0
2000	1178	100	1	1	275.676	-1.24852e+06	39.5047	-359.557	3376.18	144.582	-8.553	0	2.53135	0	2.968	0.0941691	0
2000	1177	100	1	1	275.577	-1.24867e+06	39.5014	-359.488	3375.89	144.58	-8.565	0	2.53157	0	2.973	0.0941538	0
2000	1176	100.001	1	1	275.477	-1.24881e+06	39.4981	-359.419	3375.6	144.579	-8.576	0	2.53178	0	2.979	0.0941386	0
2000	1175	100.001	1	1	275.377	-1.24896e+06	39.4947	-359.351	3375.32	144.577	-8.588	0	2.532	0	2.984	0.0941235	0
2000	1174	100.001	1	1	275.278	-1.24911e+06	39.4914	-359.282	3375.03	144.576	-8.6	0	2.53221	0	2.989	0.0941084	0
2000	1173	100.001	1	1	275.178	-1.24925e+06	39.4881	-359.214	3374.74	144.574	-8.611	0	2.53243	0	2.994	0.0940933	0
2000	1172	100.001	1	1	275.078	-1.2494e+06	39.4848	-359.145	3374.45	144.573	-8.623	0	2.53264	0	2.999	0.0940782	0
2000	1171	100.001	1	1	274.978	-1.24954e+06	39.4814	-359.077	3374.16	144.571	-8.635	0	2.53286	0	3.004	0.0940632	0
2000	1170	100.001	1	1	274.878	-1.24969e+06	39.4781	-359.008	3373.86	144.57	-8.646	0	2.53307	0	3.009	0.0940482	0
2000	1169	100.001	1	1	274.778	-1.24983e+06	39.4748	-358.94	3373.57	144.568	-8.658	0	2.53329	0	3.014	0.0940332	0
2000	1168	100.001	1	1	274.678	-1.24998e+06	39.4715	-358.871	3373.28	144.567	-8.67	0	2.5335	0	3.019	0.0940183	0
2000	1167	100.001	1	1	274.577	-1.25012e+06	39.4681	-358.803	3372.99	144.565	-8.682	0	2.53371	0	3.024	0.0940034	0
2000	1166	100.001	1	1	274.477	-1.25027e+06	39.4648	-358.735	3372.69	144.563	-8.694	0	2.53393	0	3.03	0.0939886	0
2000	1165	100.001	1	1	274.377	-1.25041e+06	39.4615	-358.666	3372.4	144.562	-8.705	0	2.53415	0	3.035	0.0939737	0
2000	1164	100.001	1	1	274.276	-1.25056e+06	39.4582	-358.598	3372.1	144.56	-8.717	0	2.53436	0	3.04	0.093959	0
2000	1163	100.001	0.997464	0.998014	274.113	-1.25079e+06	39.4426	-358.195	3368.65	144.472	-8.729	0	2.53396	3.23661	3.05	0.0941663	0
2000	1162	99.7484	0.998767	0.999035	273.376	-1.24778e+06	39.3554	-357.905	3363.52	144.111	-8.741	0	2.53387	3.23721	3.058	0.0942584	0
2000	1161	99.6262	0.990089	0.99109	272.759	-1.2467e+06	39.2894	-356.107	3349.45	143.696	-8.753	0	2.53314	2.8206	3.062	0.095766	0
2000	1160	98.6405	0.990691	0.991642	270.067	-1.23392e+06	38.9134	-354.022	3327.63	142.232	-8.765	0	2.53244	2.82323	3.067	0.0971937	0
2000	1159	97.724	0.990776	0.99172	267.548	-1.22207e+06	38.5627	-351.996	3306.73	140.858	-8.777	0	2.53175	2.82318	3.071	0.0986267	0
2000	1158	96.8243	0.990859	0.991797	265.075	-1.21044e+06	38.2183	-350.005	3286.2	139.509	-8.789	0	2.53106	2.82313	3.076	0.100065	0
2000	1157	95.9411	0.990231	0.991438	262.618	-1.19907e+06	37.874	-348.046	3265.4	138.149	-8.8	0	2.53008	2.89004	3.082	0.101559	0
2000	1156	95.0066	0.990417	0.991578	260.067	-1.18709e+06	37.5207	-346.125	3243.87	136.748	-8.812	0	2.52915	2.88121	3.089	0.103051	0
2000	1155	94.099	0.990516	0.991667	257.583	-1.17546e+06	37.1763	-344.237	3222.92	135.384	-8.824	0	2.52822	2.88062	3.095	0.104547	0
2000	1154	93.2094	0.990613	0.991753	255.149	-1.16406e+06	36.8387	-342.382	3202.38	134.048	-8.836	0	2.5273	2.88002	3.101	0.106046	0
2000	1153	92.3371	0.990451	0.991633	252.759	-1.15288e+06	36.507	-340.522	3181.88	132.732	-8.848	0	2.52629	2.8864	3.108	0.107585	0
2000	1152	91.4582	0.990489	0.991665	250.357	-1.14168e+06	36.1741	-338.677	3161.5	131.414	-8.86	0	2.52528	2.88498	3.114	0.109138	0
2000	1151	90.591	0.990585	0.991751	247.987	-1.13062e+06	35.8457	-336.861	3141.46	130.116	-8.872	0	2.52428	2.88442	3.12	0.110695	0
2000	1150	89.7408	0.990679	0.991835	245.664	-1.11978e+06	35.5237	-335.076	3121.81	128.843	-8.885	0	2.52328	2.88385	3.127	0.112256	0
2000	1149	88.9071	0.990771	0.991918	243.385	-1.10915e+06	35.2078	-333.322	3102.54	127.595	-8.897	0	2.52229	2.88328	3.133	0.11382	0
2000	1148	88.0894	0.990862	0.991998	241.15	-1.09873e+06	34.898	-331.597	3083.63	126.371	-8.909	0	2.52131	2.88271	3.139	0.115388	0
2000	1147	87.2871	0.990951	0.992078	238.957	-1.0885e+06	34.5939	-329.901	3065.08	125.171	-8.921	0	2.52033	2.88213	3.145	0.116959	0
2000	1146	86.5	0.991038	0.992155	236.804	-1.07847e+06	34.2955	-328.233	3046.87	123.993	-8.933	0	2.51936	2.88155	3.152	0.118534	0
2000	1145	85.7275	0.991123	0.992231	234.692	-1.06863e+06	34.0026	-326.592	3029	122.838	-8.945	0	2.51839	2.88097	3.158	0.120112	0
2000	1144	84.9692	0.991206	0.992306	232.618	-1.05897e+06	33.715	-324.977	3011.45	121.705	-8.957	0	2.51743	2.88039	3.164	0.121694	0
2000	1143	84.2248	0.991288	0.992379	230.581	-1.04949e+06	33.4326	-323.388	2994.22	120.592	-8.969	0	2.51647	2.8798	3.17	0.123279	0
2000	1142	83.4938	0.991369	0.992451	228.581	-1.04018e+06	33.1552	-321.823	2977.3	119.5	-8.982	0	2.51552	2.87922	3.176	0.124867	0
2000	1141	82.7759	0.991448	0.992521	226.617	-1.03104e+06	32.8828	-320.284	2960.68	118.428	-8.994	0	2.51458	2.87863	3.182	0.126458	0
2000	1140	82.0708	0.991525	0.99259	224.687	-1.02206e+06	32.6151	-318.767	2944.35	117.375	-9.006	0	2.51364	2.87804	3.187	0.128053	0
2000	1139	81.378	0.991601	0.992658	222.791	-1.01324e+06	32.352	-317.274	2928.3	116.34	-9.018	0	2.51271	2.87745	3.193	0.12965	0
2000	1138	80.6973	0.991676	0.992724	220.927	-1.00457e+06	32.0935	-315.803	2912.53	115.324	-9.031	0	2.51179	2.87685	3.199	0.131251	0
2000	1137	80.0283	0.991749	0.99279	219.096	-996057	31.8394	-314.354	2897.03	114.326	-9.043	0	2.51087	2.87626	3.205	0.132855	0
2000	1136	79.3708	0.991821	0.992854	217.295	-987689	31.5895	-312.926	2881.79	113.345	-9.055	0	2.50995	2.87566	3.21	0.134461	0
2000	1135	78.7244	0.991891	0.992916	215.525	-979463	31.3439	-311.519	2866.8	112.381	-9.067	0	2.50904	2.87506	3.216	0.136071	0
2000	1134	78.0888	0.991961	0.992978	213.784	-971377	31.1023	-310.132	2852.06	111.434	-9.08	0	2.50814	2.87446	3.222	0.137683	0
2000	1133	77.4638	0.992029	0.993039	212.071	-963426	30.8646	-308.764	2837.56	110.502	-9.092	0	2.50724	2.87386	3.227	0.139298	0
2000	1132	76.8491	0.992096	0.993098	210.387	-955606	30.6309	-307.416	2823.3	109.586	-9.105	0	2.50635	2.87326	3.233	0.140916	0
2000	1131	76.2445	0.992161	0.993156	208.73	-947916	30.4008	-306.087	2809.27	108.685	-9.117	0	2.50546	2.87265	3.238	0.142537	0
2000	1130	75.6496	0.992226	0.993214	207.1	-940351	30.1745	-304.775	2795.46	107.799	-9.129	0	2.50458	2.87205	3.244	0.14416	0
2000	1129	75.0643	0.992289	0.99327	205.495	-932908	29.9517	-303.482	2781.87	106.928	-9.142	0	2.5037	2.87145	3.249	0.145786	0
2000	1128	74.4883	0.992351	0.993325	203.916	-925584	29.7324	-302.206	2768.49	106.07	-9.154	0	2.50283	2.87084	3.254	0.147415	0
2000	1127	73.9214	0.992413	0.99338	202.361	-918377	29.5166	-300.947	2755.32	105.226	-9.167	0	2.50196	2.87023	3.259	0.149046	0
2000	1126	73.3633	0.992473	0.993433	200.831	-911283	29.304	-299.704	2742.36	104.396	-9.179	0	2.5011	2.86963	3.265	0.15068	0
2000	1125	72.8139	0.992532	0.993485	199.324	-904300	29.0947	-298.478	2729.59	103.579	-9.192	0	2.50025	2.86902	3.27	0.152316	0
2000	1124	72.2729	0.99259	0.993537	197.84	-897426	28.8886	-297.267	2717.01	102.774	-9.204	0	2.4994	2.86841	3.275	0.153955	0
2000	1123	71.7402	0.992647	0.993588	196.378	-890656	28.6855	-296.072	2704.62	101.983	-9.217	0	2.49855	2.8678	3.28	0.155596	0
2000	1122	71.2155	0.992703	0.993638	194.938	-883990	28.4855	-294.892	2692.42	101.203	-9.229	0	2.49771	2.86719	3.285	0.15724	0
2000	1121	70.6987	0.992758	0.993687	193.52	-877424	28.2884	-293.727	2680.39	100.435	-9.242	0	2.49688	2.86658	3.29	0.158886	0
2000	1120	70.1895	0.992813	0.993735	192.123	-870957	28.0942	-292.576	2668.54	99.6785	-9.254	0	2.49605	2.86597	3.295	0.160534	0
2000	1119	69.6879	0.992866	0.993782	190.745	-864586	27.9028	-291.439	2656.87	98.9336	-9.267	0	2.49522	2.86536	3.3	0.162184	0
2000	1118	69.1936	0.992919	0.993829	189.388	-858308	27.7142	-290.316	2645.36	98.1997	-9.28	0	2.4944	2.86475	3.305	0.163837	0
2000	1117	68.7065	0.992971	0.993874	188.05	-852122	27.5282	-289.206	2634.01	97.4767	-9.292	0	2.49358	2.86414	3.31	0.165493	0
2000	1116	68.2263	0.993021	0.993919	186.732	-846026	27.3449	-288.109	2622.82	96.7642	-9.305	0	2.49277	2.86353	3.315	0.16715	0
2000	1115	67.753	0.993071	0.993964	185.432	-840017	27.1642	-287.026	2611.79	96.0621	-9.318	0	2.49197	2.86292	3.319	0.16881	0
2000	1114	67.2864	0.993121	0.994007	184.15	-834095	26.9859	-285.955	2600.91	95.3702	-9.33	0	2.49117	2.86231	3.324	0.170472	0
2000	1113	66.8264	0.993169	0.99405	182.886	-828255	26.8102	-284.896	2590.19	94.6881	-9.343	0	2.49037	2.8617	3.329	0.172136	0
2000	1112	66.3728	0.993217	0.994092	181.639	-822498	26.6368	-283.849	2579.6	94.0157	-9.356	0	2.48958	2.8611	3.334	0.173802	0
2000	1111	65.9254	0.993264	0.994134	180.41	-816821	26.4658	-282.814	2569.16	93.3528	-9.368	0	2.48879	2.86049	3.338	0.17547	0
2000	1110	65.4842	0.99331	0.994175	179.197	-811223	26.297	-281.791	2558.87	92.6991	-9.381	0	2.48801	2.85988	3.343	0.17714	0
2000	1109	65.0489	0.993356	0.994215	178	-805701	26.1306	-280.779	2548.7	92.0546	-9.394	0	2.48723	2.85927	3.347	0.178813	0
2000	1108	64.6196	0.9934	0.994255	176.82	-800254	25.9663	-279.778	2538.68	91.4188	-9.407	0	2.48646	2.85866	3.352	0.180487	0
2000	1107	64.1959	0.993444	0.994294	175.655	-794881	25.8042	-278.787	2528.78	90.7918	-9.42	0	2.48569	2.85806	3.356	0.182164	0
2000	1106	63.778	0.993488	0.994332	174.505	-789579	25.6442	-277.808	2519.01	90.1733	-9.432	0	2.48492	2.85745	3.361	0.183842	0
2000	1105	63.3655	0.993531	0.99437	173.371	-784348	25.4863	-276.839	2509.37	89.563	-9.445	0	2.48416	2.85685	3.365	0.185523	0
2000	1104	62.9584	0.993573	0.994407	172.251	-779187	25.3304	-275.88	2499.85	88.961	-9.458	0	2.48341	2.85625	3.369	0.187205	0
2000	1103	62.5566	0.993614	0.994444	171.146	-774092	25.1764	-274.931	2490.45	88.3669	-9.471	0	2.48266	2.85564	3.374	0.188889	0
2000	1102	62.16	0.993655	0.99448	170.054	-769064	25.0245	-273.992	2481.16	87.7806	-9.484	0	2.48191	2.85504	3.378	0.190576	0
2000	1101	61.7685	0.993695	0.994515	168.977	-764101	24.8744	-273.062	2472	87.202	-9.497	0	2.48117	2.85444	3.382	0.192264	0
2000	1100	61.3819	0.993735	0.99455	167.913	-759201	24.7262	-272.142	2462.95	86.6309	-9.51	0	2.48043	2.85385	3.386	0.193954	0
2000	1099	61.0002	0.993774	0.994585	166.862	-754364	24.5798	-271.231	2454	86.0672	-9.523	0	2.4797	2.85325	3.39	0.195646	0
2000	1098	60.6233	0.993813	0.994619	165.824	-749588	24.4353	-270.329	2445.17	85.5106	-9.536	0	2.47897	2.85265	3.394	0.19734	0
2000	1097	60.2511	0.993851	0.994652	164.799	-744871	24.2924	-269.436	2436.44	84.9611	-9.549	0	2.47824	2.85206	3.398	0.199035	0
2000	1096	59.8834	0.993888	0.994685	163.787	-740213	24.1514	-268.552	2427.82	84.4186	-9.562	0	2.47752	2.85147	3.403	0.200733	0
2000	1095	59.5203	0.993925	0.994718	162.786	-735613	24.012	-267.676	2419.3	83.8828	-9.575	0	2.4768	2.85088	3.406	0.202432	0
2000	1094	59.1616	0.993961	0.99475	161.798	-731069	23.8742	-266.809	2410.88	83.3537	-9.588	0	2.47609	2.85029	3.41	0.204133	0
2000	1093	58.8072	0.993997	0.994781	160.822	-726580	23.7381	-265.95	2402.56	82.8311	-9.601	0	2.47538	2.8497	3.414	0.205836	0
2000	1092	58.457	0.994032	0.994812	159.857	-722146	23.6036	-265.099	2394.34	82.3149	-9.614	0	2.47467	2.84911	3.418	0.20754	0
2000	1091	58.111	0.994067	0.994843	158.904	-717764	23.4706	-264.256	2386.21	81.805	-9.627	0	2.47397	2.84853	3.422	0.209246	0
2000	1090	57.7691	0.994101	0.994873	157.961	-713435	23.3392	-263.421	2378.17	81.3013	-9.64	0	2.47328	2.84795	3.426	0.210954	0
2000	1089	57.4313	0.994135	0.994903	157.03	-709157	23.2093	-262.593	2370.23	80.8036	-9.654	0	2.47258	2.84737	3.43	0.212664	0
2000	1088	57.0973	0.994168	0.994932	156.109	-704930	23.0809	-261.773	2362.37	80.3118	-9.667	0	2.47189	2.84679	3.433	0.214375	0
2000	1087	56.7672	0.994201	0.994961	155.199	-700752	22.9539	-260.96	2354.6	79.8259	-9.68	0	2.47121	2.84621	3.437	0.216088	0
2000	1086	56.4409	0.994234	0.99499	154.299	-696622	22.8283	-260.155	2346.92	79.3456	-9.693	0	2.47053	2.84564	3.441	0.217803	0
2000	1085	56.1183	0.994266	0.995018	153.41	-692539	22.7042	-259.356	2339.32	78.871	-9.706	0	2.46985	2.84507	3.444	0.219519	0
2000	1084	55.7994	0.994297	0.995046	152.53	-688504	22.5814	-258.565	2331.81	78.4019	-9.72	0	2.46918	2.8445	3.448	0.221237	0
2000	1083	55.4841	0.994328	0.995073	151.66	-684514	22.46	-257.78	2324.38	77.9382	-9.733	0	2.46851	2.84393	3.451	0.222957	0
2000	1082	55.1723	0.994359	0.9951	150.8	-680569	22.3399	-257.002	2317.02	77.4798	-9.746	0	2.46784	2.84337	3.455	0.224678	0
2000	1081	54.864	0.994389	0.995127	149.949	-676669	22.2211	-256.231	2309.75	77.0266	-9.76	0	2.46718	2.84281	3.458	0.226401	0
2000	1080	54.559	0.994419	0.995153	149.108	-672811	22.1035	-255.466	2302.55	76.5785	-9.773	0	2.46652	2.84225	3.462	0.228125	0
2000	1079	54.2574	0.994448	0.995179	148.276	-668997	21.9873	-254.708	2295.43	76.1355	-9.786	0	2.46586	2.84169	3.465	0.229851	0
2000	1078	53.9591	0.994478	0.995205	147.452	-665224	21.8722	-253.956	2288.38	75.6974	-9.8	0	2.46521	2.84114	3.469	0.231578	0
2000	1077	53.664	0.994506	0.99523	146.638	-661493	21.7584	-253.21	2281.41	75.2641	-9.813	0	2.46456	2.84059	3.472	0.233307	0
2000	1076	53.3721	0.994534	0.995255	145.832	-657802	21.6458	-252.471	2274.51	74.8357	-9.827	0	2.46392	2.84004	3.475	0.235038	0
2000	1075	53.0833	0.994562	0.995279	145.034	-654150	21.5344	-251.737	2267.67	74.4119	-9.84	0	2.46327	2.8395	3.479	0.236769	0
2000	1074	52.7975	0.99459	0.995304	144.245	-650538	21.4241	-251.009	2260.91	73.9927	-9.853	0	2.46264	2.83895	3.482	0.238503	0
2000	1073	52.5148	0.994617	0.995328	143.464	-646964	21.3149	-250.287	2254.22	73.578	-9.867	0	2.462	2.83841	3.485	0.240238	0
2000	1072	52.235	0.994644	0.995351	142.691	-643428	21.2068	-249.571	2247.59	73.1678	-9.88	0	2.46137	2.83788	3.488	0.241974	0
2000	1071	51.9581	0.99467	0.995375	141.927	-639929	21.0999	-248.86	2241.03	72.762	-9.894	0	2.46074	2.83735	3.491	0.243712	0
2000	1070	51.6841	0.994697	0.995398	141.17	-636467	20.994	-248.155	2234.53	72.3605	-9.907	0	2.46012	2.83682	3.494	0.245451	0
2000	1069	51.4129	0.994722	0.99542	140.42	-633040	20.8892	-247.455	2228.1	71.9632	-9.921	0	2.4595	2.83629	3.498	0.247192	0
2000	1068	51.1445	0.994748	0.995443	139.679	-629649	20.7854	-246.761	2221.73	71.57	-9.935	0	2.45888	2.83577	3.501	0.248934	0
2000	1067	50.8788	0.994773	0.995465	138.944	-626293	20.6826	-246.072	2215.42	71.181	-9.948	0	2.45826	2.83525	3.504	0.250677	0
2000	1066	50.6157	0.994798	0.995487	138.217	-622970	20.5809	-245.388	2209.17	70.796	-9.962	0	2.45765	2.83473	3.507	0.252422	0
2000	1065	50.3553	0.994822	0.995508	137.497	-619681	20.4801	-244.709	2202.98	70.4149	-9.975	0	2.45704	2.83422	3.509	0.254169	0
2000	1064	50.0975	0.994847	0.99553	136.785	-616426	20.3804	-244.035	2196.85	70.0377	-9.989	0	2.45644	2.83371	3.512	0.255916	0
2000	1063	49.8422	0.994871	0.995551	136.079	-613202	20.2815	-243.366	2190.78	69.6644	-10.003	0	2.45584	2.83321	3.515	0.257665	0
2000	1062	49.5895	0.994894	0.995571	135.38	-610011	20.1837	-242.702	2184.76	69.2948	-10.016	0	2.45524	2.83271	3.518	0.259415	0
2000	1061	49.3392	0.994917	0.995592	134.688	-606852	20.0867	-242.043	2178.8	68.9289	-10.03	0	2.45464	2.83221	3.521	0.261167	0
2000	1060	49.0913	0.99494	0.995612	134.002	-603723	19.9907	-241.388	2172.89	68.5667	-10.044	0	2.45405	2.83171	3.524	0.26292	0
2000	1059	48.8459	0.994963	0.995632	133.323	-600625	19.8956	-240.738	2167.04	68.2081	-10.058	0	2.45346	2.83122	3.526	0.264674	0
2000	1058	48.6028	0.994986	0.995652	132.651	-597556	19.8013	-240.093	2161.24	67.853	-10.071	0	2.45288	2.83074	3.529	0.26643	0
2000	1057	48.362	0.995008	0.995672	131.985	-594518	19.708	-239.452	2155.49	67.5013	-10.085	0	2.45229	2.83026	3.532	0.268186	0
2000	1056	48.1235	0.99503	0.995691	131.325	-591508	19.6155	-238.816	2149.8	67.1531	-10.099	0	2.45171	2.82978	3.534	0.269945	0
2000	1055	47.8872	0.995051	0.99571	130.671	-588528	19.5238	-238.184	2144.15	66.8083	-10.113	0	2.45113	2.82931	3.537	0.271704	0
2000	1054	47.6531	0.995073	0.995729	130.023	-585575	19.433	-237.556	2138.56	66.4668	-10.127	0	2.45056	2.82884	3.54	0.273464	0
2000	1053	47.4212	0.995094	0.995747	129.382	-582650	19.343	-236.933	2133.01	66.1286	-10.141	0	2.44999	2.82837	3.542	0.275226	0
2000	1052	47.1915	0.995115	0.995766	128.746	-579753	19.2538	-236.313	2127.51	65.7936	-10.155	0	2.44942	2.82791	3.545	0.276989	0
2000	1051	46.9639	0.995135	0.995784	128.116	-576882	19.1654	-235.698	2122.06	65.4617	-10.169	0	2.44885	2.82745	3.547	0.278753	0
2000	1050	46.7384	0.995156	0.995802	127.491	-574038	19.0778	-235.087	2116.66	65.133	-10.183	0	2.44829	2.827	3.55	0.280519	0
2000	1049	46.5149	0.995176	0.99582	126.873	-571221	18.991	-234.48	2111.3	64.8074	-10.196	0	2.44773	2.82655	3.552	0.282285	0
2000	1048	46.2934	0.995196	0.995837	126.259	-568429	18.9049	-233.877	2105.99	64.4848	-10.21	0	2.44717	2.82611	3.555	0.284053	0
2000	1047	46.0739	0.995216	0.995855	125.652	-565662	18.8196	-233.278	2100.72	64.1651	-10.224	0	2.44661	2.82567	3.557	0.285822	0
2000	1046	45.8564	0.995235	0.995872	125.049	-562920	18.735	-232.683	2095.5	63.8484	-10.239	0	2.44606	2.82524	3.559	0.287592	0
2000	1045	45.6408	0.995254	0.995889	124.452	-560204	18.6512	-232.091	2090.32	63.5346	-10.253	0	2.44551	2.82481	3.562	0.289363	0
2000	1044	45.4271	0.995273	0.995906	123.86	-557511	18.5681	-231.504	2085.18	63.2237	-10.267	0	2.44496	2.82439	3.564	0.291135	0
2000	1043	45.2153	0.995292	0.995922	123.274	-554842	18.4857	-230.92	2080.08	62.9156	-10.281	0	2.44442	2.82397	3.566	0.292908	0
2000	1042	45.0054	0.99531	0.995938	122.692	-552197	18.4039	-230.339	2075.03	62.6102	-10.295	0	2.44388	2.82355	3.568	0.294683	0
2000	1041	44.7972	0.995329	0.995955	122.115	-549576	18.3229	-229.763	2070.01	62.3076	-10.309	0	2.44334	2.82314	3.571	0.296458	0
2000	1040	44.5909	0.995347	0.995971	121.544	-546977	18.2426	-229.189	2065.04	62.0077	-10.323	0	2.4428	2.82274	3.573	0.298235	0
2000	1039	44.3863	0.995365	0.995986	120.977	-544401	18.1629	-228.62	2060.11	61.7104	-10.337	0	2.44227	2.82234	3.575	0.300012	0
2000	1038	44.1835	0.995382	0.996002	120.415	-541847	18.0839	-228.053	2055.21	61.4158	-10.352	0	2.44174	2.82195	3.577	0.301791	0
2000	1037	43.9824	0.9954	0.996018	119.857	-539315	18.0055	-227.49	2050.36	61.1237	-10.366	0	2.44121	2.82156	3.579	0.303571	0
2000	1036	43.783	0.995417	0.996033	119.305	-536805	17.9278	-226.931	2045.54	60.8342	-10.38	0	2.44068	2.82118	3.581	0.305351	0
2000	1035	43.5853	0.995434	0.996048	118.757	-534316	17.8507	-226.375	2040.76	60.5472	-10.394	0	2.44015	2.8208	3.583	0.307133	0
2000	1034	43.3893	0.995451	0.996063	118.213	-531848	17.7742	-225.822	2036.02	60.2626	-10.409	0	2.43963	2.82043	3.585	0.308916	0
2000	1033	43.1948	0.995447	0.996065	117.674	-529402	17.6984	-225.271	2031.28	59.9802	-10.423	0	2.43909	2.82392	3.587	0.310705	0
2000	1032	43.0018	0.995435	0.996064	117.138	-526973	17.6231	-224.724	2026.56	59.6997	-10.437	0	2.43855	2.82974	3.589	0.3125	0
2000	1031	42.8095	0.995442	0.996073	116.605	-524558	17.5481	-224.179	2021.87	59.4207	-10.452	0	2.438	2.83175	3.591	0.314297	0
2000	1030	42.6183	0.995457	0.996087	116.076	-522162	17.4737	-223.637	2017.21	59.1436	-10.466	0	2.43745	2.83162	3.594	0.316094	0
2000	1029	42.4287	0.995472	0.996101	115.551	-519784	17.3999	-223.099	2012.59	58.8689	-10.48	0	2.43691	2.83149	3.596	0.317893	0
2000	1028	42.2405	0.995487	0.996114	115.029	-517426	17.3266	-222.563	2007.99	58.5964	-10.495	0	2.43637	2.83138	3.598	0.319693	0
2000	1027	42.0539	0.995501	0.996127	114.512	-515087	17.2539	-222.03	2003.43	58.3261	-10.509	0	2.43583	2.83128	3.6	0.321494	0
2000	1026	41.8686	0.995515	0.99614	113.999	-512767	17.1817	-221.501	1998.9	58.058	-10.524	0	2.43529	2.8312	3.601	0.323296	0
2000	1025	41.6848	0.995529	0.996153	113.49	-510465	17.1101	-220.974	1994.41	57.792	-10.538	0	2.43475	2.83113	3.603	0.3251	0
2000	1024	41.5025	0.995543	0.996166	112.985	-508181	17.039	-220.45	1989.94	57.5281	-10.553	0	2.43421	2.83107	3.605	0.326904	0
2000	1023	41.3215	0.995557	0.996178	112.483	-505915	16.9685	-219.929	1985.53	57.2674	-10.567	0	2.43367	2.83103	3.607	0.32871	0
2000	1022	41.1418	0.99557	0.99619	111.986	-503667	16.8985	-219.411	1981.12	57.0077	-10.582	0	2.43313	2.83101	3.609	0.330518	0
2000	1021	40.9636	0.995583	0.996202	111.492	-501437	16.829	-218.895	1976.75	56.75	-10.596	0	2.4326	2.831	3.611	0.332326	0
2000	1020	40.7866	0.995596	0.996214	111.001	-499224	16.76	-218.382	1972.39	56.4942	-10.611	0	2.43206	2.831	3.613	0.334136	0
2000	1019	40.611	0.995608	0.996226	110.515	-497027	16.6915	-217.872	1968.07	56.2405	-10.626	0	2.43153	2.83103	3.615	0.335947	0
2000	1018	40.4366	0.99562	0.996237	110.031	-494847	16.6235	-217.365	1963.78	55.9886	-10.64	0	2.43099	2.83107	3.616	0.337759	0
2000	1017	40.2635	0.995632	0.996248	109.552	-492684	16.556	-216.86	1959.51	55.7387	-10.655	0	2.43046	2.83113	3.618	0.339573	0
2000	1016	40.0916	0.995644	0.996259	109.075	-490537	16.4889	-216.357	1955.27	55.4906	-10.67	0	2.42992	2.83121	3.62	0.341388	0
2000	1015	39.921	0.995656	0.99627	108.603	-488406	16.4224	-215.857	1951.05	55.2444	-10.684	0	2.42939	2.83132	3.622	0.343204	0
2000	1014	39.7515	0.995667	0.996281	108.133	-486291	16.3563	-215.36	1946.86	55	-10.699	0	2.42885	2.83144	3.623	0.345022	0
2000	1013	39.5833	0.995678	0.996291	107.667	-484191	16.2906	-214.865	1942.7	54.7574	-10.714	0	2.42832	2.83158	3.625	0.346841	0
2000	1012	39.4162	0.995689	0.996302	107.204	-482106	16.2255	-214.372	1938.56	54.5165	-10.729	0	2.42779	2.83175	3.627	0.348662	0
2000	1011	39.2503	0.995699	0.996312	106.744	-480037	16.1607	-213.882	1934.44	54.2774	-10.744	0	2.42725	2.83195	3.628	0.350483	0
2000	1010	39.0855	0.99571	0.996321	106.288	-477982	16.0964	-213.395	1930.35	54.0399	-10.758	0	2.42672	2.83217	3.63	0.352306	0
2000	1009	38.9218	0.995719	0.996331	105.834	-475943	16.0326	-212.909	1926.28	53.8042	-10.773	0	2.42618	2.83242	3.631	0.354131	0
2000	1008	38.7592	0.995729	0.996341	105.384	-473917	15.9691	-212.426	1922.23	53.57	-10.788	0	2.42564	2.83272	3.633	0.355957	0
2000	1007	38.5977	0.995738	0.99635	104.936	-471906	15.9061	-211.945	1918.21	53.3375	-10.803	0	2.42511	2.83305	3.635	0.357784	0
2000	1006	38.4372	0.995747	0.996358	104.492	-469909	15.8435	-211.466	1914.2	53.1066	-10.818	0	2.42457	2.83344	3.636	0.359614	0
2000	1005	38.2777	0.995755	0.996367	104.05	-467925	15.7813	-210.99	1910.22	52.8772	-10.833	0	2.42402	2.83391	3.638	0.361444	0
2000	1004	38.1193	0.995763	0.996375	103.611	-465955	15.7195	-210.516	1906.26	52.6493	-10.848	0	2.42348	2.83447	3.639	0.363277	0
2000	1003	37.9618	0.995769	0.996382	103.175	-463998	15.658	-210.043	1902.31	52.4229	-10.863	0	2.42293	2.8352	3.641	0.365111	0
2000	1002	37.8052	0.995774	0.996388	102.741	-462054	15.597	-209.573	1898.38	52.1979	-10.878	0	2.42238	2.8362	3.642	0.366948	0
2000	1001	37.6495	0.995775	0.996392	102.31	-460122	15.5363	-209.105	1894.46	51.9741	-10.893	0	2.42183	2.83774	3.644	0.368789	0
2000	1000	37.4945	0.995768	0.996391	101.88	-458201	15.4759	-208.638	1890.54	51.7514	-10.908	0	2.42125	2.84069	3.646	0.370634	0
2000	999	37.3397	0.995947	0.996508	101.454	-456284	15.4157	-208.178	1886.82	51.5314	-10.923	0	2.42082	2.81124	3.647	0.372436	0
2000	998	37.1918	0.995351	0.996126	101.036	-454443	15.3575	-207.703	1882.48	51.3115	-10.938	0	2.41986	2.90669	3.65	0.374408	0
2000	997	37.0237	0.994899	0.995846	100.571	-452447	15.2939	-207.211	1877.53	51.0664	-10.953	0	2.41851	2.9728	3.654	0.376497	0
2000	996	36.8396	0.994922	0.995866	100.073	-450333	15.2264	-206.718	1872.47	50.8062	-10.968	0	2.41717	2.97193	3.659	0.378585	0
2000	995	36.6573	0.994945	0.995886	99.5806	-448239	15.1594	-206.228	1867.45	50.5486	-10.984	0	2.41583	2.97107	3.663	0.380672	0
2000	994	36.4768	0.994968	0.995906	99.0925	-446166	15.0931	-205.742	1862.49	50.2935	-10.999	0	2.41451	2.97023	3.667	0.382758	0
2000	993	36.298	0.994991	0.995926	98.6091	-444113	15.0275	-205.259	1857.57	50.041	-11.014	0	2.41318	2.9694	3.672	0.384842	0
2000	992	36.121	0.995014	0.995945	98.1303	-442079	14.9624	-204.779	1852.7	49.7909	-11.029	0	2.41187	2.96859	3.676	0.386924	0
2000	991	35.9457	0.995036	0.995964	97.656	-440064	14.8979	-204.302	1847.87	49.5432	-11.045	0	2.41056	2.96779	3.68	0.389005	0
2000	990	35.772	0.995057	0.995983	97.1861	-438069	14.834	-203.829	1843.09	49.298	-11.06	0	2.40925	2.967	3.684	0.391085	0
2000	989	35.5999	0.995079	0.996001	96.7206	-436092	14.7706	-203.358	1838.35	49.0551	-11.075	0	2.40795	2.96623	3.688	0.393164	0
2000	988	35.4295	0.9951	0.99602	96.2594	-434133	14.7079	-202.891	1833.65	48.8145	-11.091	0	2.40666	2.96547	3.692	0.39524	0
2000	987	35.2607	0.995121	0.996038	95.8024	-432193	14.6457	-202.427	1828.99	48.5762	-11.106	0	2.40537	2.96473	3.697	0.397316	0
2000	986	35.0934	0.995142	0.996056	95.3495	-430271	14.584	-201.965	1824.38	48.3402	-11.121	0	2.40408	2.96399	3.7	0.39939	0
2000	985	34.9276	0.995163	0.996074	94.9008	-428366	14.5229	-201.507	1819.81	48.1063	-11.137	0	2.40281	2.96327	3.704	0.401462	0
2000	984	34.7634	0.995183	0.996092	94.4561	-426479	14.4623	-201.051	1815.27	47.8747	-11.152	0	2.40153	2.96257	3.708	0.403533	0
2000	983	34.6007	0.995203	0.996109	94.0154	-424609	14.4023	-200.598	1810.78	47.6452	-11.168	0	2.40027	2.96188	3.712	0.405603	0
2000	982	34.4394	0.995223	0.996126	93.5787	-422755	14.3427	-200.148	1806.32	47.4178	-11.183	0	2.399	2.9612	3.716	0.407671	0
2000	981	34.2796	0.995242	0.996143	93.1458	-420919	14.2837	-199.701	1801.9	47.1925	-11.199	0	2.39774	2.96054	3.72	0.409737	0
2000	980	34.1213	0.995261	0.99616	92.7167	-419098	14.2252	-199.256	1797.52	46.9692	-11.214	0	2.39649	2.95988	3.724	0.411802	0
2000	979	33.9643	0.99528	0.996177	92.2913	-417294	14.1671	-198.815	1793.17	46.748	-11.23	0	2.39524	2.95925	3.727	0.413865	0
2000	978	33.8087	0.995299	0.996193	91.8697	-415506	14.1096	-198.376	1788.87	46.5288	-11.246	0	2.394	2.95862	3.731	0.415927	0
2000	977	33.6545	0.995318	0.996209	91.4517	-413734	14.0526	-197.939	1784.59	46.3115	-11.261	0	2.39276	2.95801	3.734	0.417987	0
2000	976	33.5016	0.995336	0.996225	91.0373	-411977	13.996	-197.505	1780.36	46.0962	-11.277	0	2.39153	2.95742	3.738	0.420045	0
2000	975	33.3501	0.995354	0.996241	90.6265	-410235	13.9399	-197.074	1776.15	45.8827	-11.293	0	2.3903	2.95684	3.742	0.422102	0
2000	974	33.1999	0.995372	0.996257	90.2192	-408508	13.8842	-196.645	1771.98	45.6712	-11.308	0	2.38907	2.95627	3.745	0.424158	0
2000	973	33.0509	0.99539	0.996273	89.8153	-406796	13.8291	-196.219	1767.85	45.4615	-11.324	0	2.38785	2.95571	3.748	0.426211	0
2000	972	32.9033	0.995408	0.996288	89.4148	-405099	13.7743	-195.795	1763.74	45.2536	-11.34	0	2.38663	2.95517	3.752	0.428263	0
2000	971	32.7569	0.995425	0.996303	89.0177	-403417	13.72	-195.374	1759.67	45.0476	-11.355	0	2.38542	2.95465	3.755	0.430314	0
2000	970	32.6117	0.995442	0.996318	88.6238	-401748	13.6662	-194.955	1755.63	44.8433	-11.371	0	2.38421	2.95413	3.759	0.432362	0
2000	969	32.4678	0.995459	0.996333	88.2333	-400094	13.6128	-194.538	1751.63	44.6407	-11.387	0	2.383	2.95363	3.762	0.434409	0
2000	968	32.325	0.995476	0.996348	87.8459	-398454	13.5598	-194.124	1747.65	44.4399	-11.403	0	2.3818	2.95315	3.765	0.436455	0
2000	967	32.1835	0.995493	0.996363	87.4618	-396827	13.5072	-193.712	1743.7	44.2408	-11.419	0	2.3806	2.95268	3.768	0.438498	0
2000	966	32.0431	0.995509	0.996377	87.0807	-395214	13.4551	-193.302	1739.79	44.0434	-11.435	0	2.37941	2.95222	3.771	0.44054	0
2000	965	31.9038	0.995525	0.996392	86.7028	-393614	13.4033	-192.895	1735.9	43.8476	-11.451	0	2.37822	2.95178	3.775	0.44258	0
2000	964	31.7658	0.995541	0.996406	86.3279	-392027	13.352	-192.49	1732.04	43.6534	-11.467	0	2.37703	2.95135	3.778	0.444618	0
2000	963	31.6288	0.995557	0.99642	85.956	-390454	13.3011	-192.087	1728.22	43.4609	-11.483	0	2.37585	2.95094	3.781	0.446655	0
2000	962	31.4929	0.995573	0.996434	85.5871	-388893	13.2505	-191.686	1724.42	43.27	-11.499	0	2.37467	2.95054	3.784	0.44869	0
2000	961	31.3582	0.995588	0.996448	85.2211	-387345	13.2004	-191.288	1720.64	43.0806	-11.515	0	2.3735	2.95016	3.787	0.450723	0
2000	960	31.2245	0.995604	0.996461	84.858	-385810	13.1506	-190.892	1716.9	42.8928	-11.531	0	2.37233	2.94979	3.79	0.452754	0
2000	959	31.0919	0.995619	0.996475	84.4978	-384286	13.1013	-190.497	1713.18	42.7065	-11.547	0	2.37116	2.94943	3.793	0.454783	0
2000	958	30.9603	0.995634	0.996488	84.1404	-382776	13.0523	-190.105	1709.49	42.5217	-11.563	0	2.36999	2.94909	3.796	0.45681	0
2000	957	30.8298	0.995649	0.996501	83.7858	-381277	13.0036	-189.715	1705.82	42.3384	-11.579	0	2.36883	2.94877	3.798	0.458836	0
2000	956	30.7003	0.995663	0.996515	83.4339	-379790	12.9554	-189.327	1702.18	42.1566	-11.595	0	2.36767	2.94846	3.801	0.46086	0
2000	955	30.5718	0.995678	0.996528	83.0848	-378315	12.9075	-188.942	1698.57	41.9762	-11.611	0	2.36652	2.94816	3.804	0.462882	0
2000	954	30.4443	0.995692	0.996541	82.7383	-376851	12.86	-188.558	1694.98	41.7972	-11.628	0	2.36536	2.94788	3.807	0.464902	0
2000	953	30.3179	0.995706	0.996553	82.3945	-375399	12.8128	-188.176	1691.42	41.6197	-11.644	0	2.36421	2.94762	3.81	0.46692	0
2000	952	30.1923	0.995721	0.996566	82.0533	-373959	12.7659	-187.796	1687.88	41.4435	-11.66	0	2.36306	2.94737	3.812	0.468936	0
2000	951	30.0678	0.995734	0.996579	81.7146	-372530	12.7194	-187.418	1684.36	41.2688	-11.676	0	2.36192	2.94714	3.815	0.47095	0
2000	950	29.9442	0.995748	0.996591	81.3786	-371111	12.6733	-187.042	1680.87	41.0954	-11.693	0	2.36078	2.94693	3.818	0.472962	0
2000	949	29.8215	0.995762	0.996603	81.045	-369704	12.6275	-186.668	1677.4	40.9233	-11.709	0	2.35964	2.94673	3.82	0.474973	0
2000	948	29.6986	0.993529	0.99498	80.693	-368314	12.5805	-186.205	1672.88	40.7318	-11.725	0	2.35724	3.04304	3.827	0.478147	0
2000	947	29.5098	0.995505	0.996416	80.2163	-366219	12.5146	-185.798	1668.54	40.4849	-11.742	0	2.35588	2.95707	3.83	0.480384	0
2000	946	29.3805	0.995521	0.99643	79.8674	-364765	12.467	-185.413	1664.85	40.3044	-11.758	0	2.35452	2.95676	3.834	0.482619	0
2000	945	29.2522	0.995537	0.996444	79.5214	-363322	12.4197	-185.031	1661.2	40.1254	-11.775	0	2.35316	2.95645	3.837	0.484852	0
2000	944	29.125	0.995553	0.996459	79.1781	-361891	12.3728	-184.651	1657.57	39.9479	-11.791	0	2.35181	2.95614	3.84	0.487083	0
2000	943	28.9988	0.995568	0.996473	78.8375	-360471	12.3263	-184.273	1653.97	39.7719	-11.808	0	2.35046	2.95583	3.844	0.489312	0
2000	942	28.8736	0.995584	0.996487	78.4997	-359063	12.2801	-183.897	1650.39	39.5973	-11.824	0	2.34912	2.95551	3.847	0.491538	0
2000	941	28.7494	0.9956	0.996501	78.1645	-357666	12.2343	-183.523	1646.84	39.4241	-11.841	0	2.34778	2.95519	3.85	0.493763	0
2000	940	28.6262	0.995615	0.996515	77.832	-356280	12.1888	-183.151	1643.32	39.2523	-11.857	0	2.34644	2.95487	3.854	0.495985	0
2000	939	28.504	0.995631	0.996529	77.5021	-354905	12.1437	-182.781	1639.82	39.0819	-11.874	0	2.34511	2.95454	3.857	0.498205	0
2000	938	28.3828	0.995646	0.996543	77.1747	-353541	12.0989	-182.412	1636.34	38.9129	-11.891	0	2.34378	2.95422	3.86	0.500423	0
2000	937	28.2625	0.995661	0.996556	76.85	-352188	12.0545	-182.046	1632.9	38.7453	-11.907	0	2.34246	2.95389	3.863	0.502638	0
2000	936	28.1432	0.995677	0.99657	76.5278	-350845	12.0104	-181.681	1629.47	38.579	-11.924	0	2.34114	2.95356	3.866	0.504851	0
2000	935	28.0248	0.995692	0.996584	76.2081	-349513	11.9666	-181.318	1626.07	38.414	-11.941	0	2.33983	2.95323	3.869	0.507061	0
2000	934	27.9074	0.995707	0.996597	75.8909	-348192	11.9231	-180.957	1622.69	38.2504	-11.958	0	2.33852	2.95289	3.872	0.509268	0
2000	933	27.7909	0.995722	0.996611	75.5761	-346881	11.88	-180.598	1619.34	38.0881	-11.974	0	2.33721	2.95255	3.875	0.511473	0
2000	932	27.6753	0.995738	0.996624	75.2638	-345580	11.8372	-180.241	1616.01	37.9271	-11.991	0	2.33591	2.95221	3.878	0.513675	0
2000	931	27.5606	0.995753	0.996638	74.9539	-344289	11.7947	-179.885	1612.71	37.7674	-12.008	0	2.33461	2.95187	3.881	0.515874	0
2000	930	27.4468	0.995768	0.996651	74.6464	-343008	11.7526	-179.531	1609.42	37.609	-12.025	0	2.33332	2.95152	3.883	0.51807	0
2000	929	27.3339	0.995783	0.996664	74.3413	-341737	11.7107	-179.179	1606.16	37.4518	-12.042	0	2.33203	2.95117	3.886	0.520263	0
2000	928	27.2219	0.995797	0.996678	74.0385	-340476	11.6692	-178.829	1602.93	37.2959	-12.059	0	2.33075	2.95082	3.889	0.522453	0
2000	927	27.1107	0.995812	0.996691	73.7381	-339225	11.6279	-178.48	1599.71	37.1412	-12.076	0	2.32947	2.95046	3.892	0.52464	0
2000	926	27.0005	0.995827	0.996704	73.4399	-337984	11.587	-178.133	1596.52	36.9877	-12.093	0	2.32819	2.95011	3.894	0.526824	0
2000	925	26.8911	0.995842	0.996717	73.1441	-336752	11.5464	-177.788	1593.35	36.8355	-12.11	0	2.32692	2.94975	3.897	0.529005	0
2000	924	26.7825	0.995857	0.99673	72.8504	-335529	11.506	-177.444	1590.2	36.6844	-12.127	0	2.32565	2.94939	3.899	0.531182	0
2000	923	26.6748	0.995871	0.996743	72.5591	-334316	11.466	-177.102	1587.07	36.5346	-12.144	0	2.32439	2.94902	3.902	0.533356	0
2000	922	26.5679	0.995886	0.996756	72.2699	-333112	11.4262	-176.762	1583.96	36.3859	-12.161	0	2.32314	2.94866	3.904	0.535526	0
2000	921	26.4618	0.995901	0.996769	71.9829	-331918	11.3868	-176.423	1580.87	36.2384	-12.178	0	2.32188	2.94828	3.907	0.537693	0
2000	920	26.3566	0.995915	0.996782	71.6981	-330732	11.3476	-176.086	1577.81	36.092	-12.195	0	2.32063	2.94791	3.909	0.539857	0
2000	919	26.2522	0.99593	0.996794	71.4155	-329556	11.3087	-175.751	1574.76	35.9468	-12.212	0	2.31939	2.94754	3.911	0.542017	0
2000	918	26.1485	0.995944	0.996807	71.135	-328388	11.2701	-175.417	1571.74	35.8027	-12.23	0	2.31815	2.94716	3.914	0.544173	0
2000	917	26.0457	0.995958	0.99682	70.8566	-327229	11.2318	-175.085	1568.73	35.6597	-12.247	0	2.31692	2.94678	3.916	0.546325	0
2000	916	25.9437	0.995973	0.996832	70.5803	-326080	11.1938	-174.754	1565.75	35.5179	-12.264	0	2.31569	2.9464	3.918	0.548474	0
2000	915	25.8424	0.995987	0.996845	70.3061	-324938	11.156	-174.425	1562.78	35.3771	-12.281	0	2.31446	2.94601	3.92	0.550618	0
2000	914	25.7419	0.996002	0.996857	70.0339	-323806	11.1185	-174.097	1559.84	35.2375	-12.299	0	2.31324	2.94562	3.923	0.552759	0
2000	913	25.6422	0.996016	0.99687	69.7637	-322682	11.0813	-173.771	1556.91	35.0989	-12.316	0	2.31203	2.94523	3.925	0.554895	0
2000	912	25.5433	0.99603	0.996882	69.4956	-321566	11.0443	-173.446	1554	34.9614	-12.333	0	2.31081	2.94484	3.927	0.557028	0
2000	911	25.4451	0.996044	0.996895	69.2295	-320459	11.0077	-173.123	1551.12	34.825	-12.351	0	2.30961	2.94444	3.929	0.559156	0
2000	910	25.3476	0.996058	0.996907	68.9654	-319360	10.9712	-172.801	1548.25	34.6896	-12.368	0	2.30841	2.94404	3.931	0.561281	0
2000	909	25.2509	0.996073	0.996919	68.7032	-318270	10.9351	-172.481	1545.4	34.5552	-12.386	0	2.30721	2.94364	3.933	0.563401	0
2000	908	25.1549	0.996087	0.996931	68.4429	-317187	10.8992	-172.163	1542.56	34.4219	-12.403	0	2.30601	2.94324	3.935	0.565516	0
2000	907	25.0597	0.996101	0.996944	68.1846	-316113	10.8635	-171.845	1539.75	34.2896	-12.421	0	2.30483	2.94283	3.937	0.567627	0
2000	906	24.9652	0.996115	0.996956	67.9282	-315047	10.8281	-171.529	1536.95	34.1583	-12.438	0	2.30364	2.94243	3.938	0.569734	0
2000	905	24.8714	0.996129	0.996968	67.6737	-313988	10.793	-171.215	1534.17	34.0281	-12.456	0	2.30247	2.94201	3.94	0.571836	0
2000	904	24.7783	0.996143	0.99698	67.4211	-312938	10.7581	-170.902	1531.41	33.8988	-12.474	0	2.30129	2.9416	3.942	0.573934	0
2000	903	24.6859	0.996157	0.996992	67.1703	-311895	10.7234	-170.59	1528.67	33.7705	-12.491	0	2.30012	2.94118	3.944	0.576027	0
2000	902	24.5942	0.996171	0.997004	66.9214	-310860	10.689	-170.28	1525.94	33.6432	-12.509	0	2.29896	2.94077	3.945	0.578115	0
2000	901	24.5032	0.996185	0.997016	66.6743	-309833	10.6549	-169.972	1523.24	33.5169	-12.527	0	2.2978	2.94035	3.947	0.580199	0
2000	900	24.4129	0.996198	0.997028	66.429	-308813	10.6209	-169.664	1520.54	33.3915	-12.544	0	2.29665	2.93993	3.949	0.582278	0
Title:	R-magma	-	mresidual	from	MZ-magma	at	T	=	1145	C
Liquid	Composition:
Pressure	Temperature	mass	SiO2	TiO2	Al2O3	Fe2O3	Cr2O3	FeO	MnO	MgO	CaO	Na2O	K2O	H2O
2000	1400	99.9932	55.7671	0.157692	16.7856	1.1651	0.00280432	6.51636	0.194035	5.38987	8.22222	4.67249	0.11589	1.01086
2000	1400	99.9932	55.7671	0.157692	16.7856	1.1651	0.00280432	6.51636	0.194035	5.38987	8.22222	4.67249	0.11589	1.01086
2000	1399	99.9932	55.7671	0.157692	16.7856	1.16524	0.00280432	6.51624	0.194035	5.38987	8.22222	4.67249	0.11589	1.01086
2000	1398	99.9932	55.7671	0.157692	16.7856	1.16537	0.00280432	6.51612	0.194035	5.38987	8.22222	4.67248	0.11589	1.01086
2000	1397	99.9932	55.7671	0.157692	16.7856	1.16551	0.00280432	6.51599	0.194035	5.38987	8.22221	4.67248	0.11589	1.01086
2000	1396	99.9932	55.767	0.157692	16.7856	1.16565	0.00280432	6.51587	0.194035	5.38987	8.22221	4.67248	0.11589	1.01086
2000	1395	99.9932	55.767	0.157692	16.7856	1.16579	0.00280432	6.51574	0.194035	5.38987	8.22221	4.67248	0.11589	1.01086
2000	1394	99.9933	55.767	0.157692	16.7856	1.16593	0.00280432	6.51561	0.194035	5.38987	8.22221	4.67248	0.115889	1.01086
2000	1393	99.9933	55.767	0.157691	16.7856	1.16607	0.00280432	6.51548	0.194035	5.38987	8.22221	4.67248	0.115889	1.01086
2000	1392	99.9933	55.767	0.157691	16.7856	1.16622	0.00280432	6.51535	0.194035	5.38987	8.22221	4.67248	0.115889	1.01086
2000	1391	99.9933	55.767	0.157691	16.7856	1.16636	0.00280431	6.51522	0.194035	5.38987	8.22221	4.67248	0.115889	1.01086
2000	1390	99.9933	55.767	0.157691	16.7856	1.16651	0.00280431	6.51508	0.194035	5.38986	8.22221	4.67248	0.115889	1.01086
2000	1389	99.9933	55.767	0.157691	16.7856	1.16666	0.00280431	6.51495	0.194035	5.38986	8.22221	4.67248	0.115889	1.01086
2000	1388	99.9933	55.767	0.157691	16.7856	1.16681	0.00280431	6.51481	0.194035	5.38986	8.2222	4.67248	0.115889	1.01086
2000	1387	99.9934	55.767	0.157691	16.7856	1.16696	0.00280431	6.51467	0.194034	5.38986	8.2222	4.67248	0.115889	1.01086
2000	1386	99.9934	55.767	0.157691	16.7856	1.16711	0.00280431	6.51454	0.194034	5.38986	8.2222	4.67248	0.115889	1.01086
2000	1385	99.9934	55.767	0.157691	16.7856	1.16727	0.00280431	6.5144	0.194034	5.38986	8.2222	4.67248	0.115889	1.01086
2000	1384	99.9934	55.7669	0.157691	16.7856	1.16742	0.00280431	6.51425	0.194034	5.38986	8.2222	4.67248	0.115889	1.01086
2000	1383	99.9934	55.7669	0.157691	16.7856	1.16758	0.00280431	6.51411	0.194034	5.38986	8.2222	4.67247	0.115889	1.01086
2000	1382	99.9934	55.7669	0.157691	16.7856	1.16774	0.00280431	6.51397	0.194034	5.38986	8.2222	4.67247	0.115889	1.01086
2000	1381	99.9935	55.7669	0.157691	16.7856	1.1679	0.00280431	6.51382	0.194034	5.38986	8.2222	4.67247	0.115889	1.01086
2000	1380	99.9935	55.7669	0.157691	16.7855	1.16806	0.00280431	6.51368	0.194034	5.38986	8.22219	4.67247	0.115889	1.01086
2000	1379	99.9935	55.7669	0.157691	16.7855	1.16822	0.00280431	6.51353	0.194034	5.38986	8.22219	4.67247	0.115889	1.01086
2000	1378	99.9935	55.7669	0.157691	16.7855	1.16839	0.00280431	6.51338	0.194034	5.38985	8.22219	4.67247	0.115889	1.01086
2000	1377	99.9935	55.7669	0.157691	16.7855	1.16855	0.00280431	6.51323	0.194034	5.38985	8.22219	4.67247	0.115889	1.01086
2000	1376	99.9935	55.7669	0.157691	16.7855	1.16872	0.00280431	6.51308	0.194034	5.38985	8.22219	4.67247	0.115889	1.01086
2000	1375	99.9936	55.7669	0.157691	16.7855	1.16889	0.00280431	6.51292	0.194034	5.38985	8.22219	4.67247	0.115889	1.01086
2000	1374	99.9936	55.7669	0.157691	16.7855	1.16906	0.00280431	6.51277	0.194034	5.38985	8.22219	4.67247	0.115889	1.01086
2000	1373	99.9936	55.7668	0.157691	16.7855	1.16923	0.00280431	6.51261	0.194034	5.38985	8.22218	4.67247	0.115889	1.01086
2000	1372	99.9936	55.7668	0.157691	16.7855	1.1694	0.00280431	6.51246	0.194034	5.38985	8.22218	4.67247	0.115889	1.01086
2000	1371	99.9936	55.7668	0.157691	16.7855	1.16958	0.00280431	6.5123	0.194034	5.38985	8.22218	4.67246	0.115889	1.01086
2000	1370	99.9936	55.7668	0.157691	16.7855	1.16976	0.00280431	6.51214	0.194034	5.38985	8.22218	4.67246	0.115889	1.01086
2000	1369	99.9937	55.7668	0.157691	16.7855	1.16993	0.0028043	6.51198	0.194034	5.38985	8.22218	4.67246	0.115889	1.01086
2000	1368	99.9937	55.7668	0.157691	16.7855	1.17011	0.0028043	6.51181	0.194034	5.38985	8.22218	4.67246	0.115889	1.01086
2000	1367	99.9937	55.7668	0.157691	16.7855	1.17029	0.0028043	6.51165	0.194034	5.38984	8.22218	4.67246	0.115889	1.01086
2000	1366	99.9937	55.7668	0.157691	16.7855	1.17048	0.0028043	6.51148	0.194034	5.38984	8.22217	4.67246	0.115889	1.01086
2000	1365	99.9937	55.7668	0.157691	16.7855	1.17066	0.0028043	6.51132	0.194034	5.38984	8.22217	4.67246	0.115889	1.01086
2000	1364	99.9938	55.7668	0.157691	16.7855	1.17084	0.0028043	6.51115	0.194034	5.38984	8.22217	4.67246	0.115889	1.01086
2000	1363	99.9938	55.7667	0.157691	16.7855	1.17103	0.0028043	6.51098	0.194034	5.38984	8.22217	4.67246	0.115889	1.01086
2000	1362	99.9938	55.7667	0.157691	16.7855	1.17122	0.0028043	6.51081	0.194034	5.38984	8.22217	4.67246	0.115889	1.01086
2000	1361	99.9938	55.7667	0.157691	16.7855	1.17141	0.0028043	6.51064	0.194034	5.38984	8.22217	4.67246	0.115889	1.01086
2000	1360	99.9938	55.7667	0.157691	16.7855	1.1716	0.0028043	6.51046	0.194034	5.38984	8.22216	4.67246	0.115889	1.01086
2000	1359	99.9938	55.7667	0.157691	16.7855	1.17179	0.0028043	6.51029	0.194034	5.38984	8.22216	4.67245	0.115889	1.01086
2000	1358	99.9939	55.7667	0.157691	16.7855	1.17199	0.0028043	6.51011	0.194033	5.38983	8.22216	4.67245	0.115889	1.01086
2000	1357	99.9939	55.7667	0.157691	16.7855	1.17218	0.0028043	6.50993	0.194033	5.38983	8.22216	4.67245	0.115889	1.01086
2000	1356	99.9939	55.7667	0.15769	16.7855	1.17238	0.0028043	6.50976	0.194033	5.38983	8.22216	4.67245	0.115889	1.01086
2000	1355	99.9939	55.7667	0.15769	16.7855	1.17258	0.0028043	6.50958	0.194033	5.38983	8.22216	4.67245	0.115889	1.01086
2000	1354	99.9939	55.7666	0.15769	16.7855	1.17278	0.0028043	6.50939	0.194033	5.38983	8.22215	4.67245	0.115889	1.01086
2000	1353	99.994	55.7666	0.15769	16.7855	1.17298	0.0028043	6.50921	0.194033	5.38983	8.22215	4.67245	0.115889	1.01086
2000	1352	99.994	55.7666	0.15769	16.7855	1.17319	0.0028043	6.50902	0.194033	5.38983	8.22215	4.67245	0.115889	1.01086
2000	1351	99.994	55.7666	0.15769	16.7855	1.17339	0.00280429	6.50884	0.194033	5.38983	8.22215	4.67245	0.115889	1.01086
2000	1350	99.994	55.7666	0.15769	16.7855	1.1736	0.00280429	6.50865	0.194033	5.38983	8.22215	4.67245	0.115889	1.01086
2000	1349	99.994	55.7666	0.15769	16.7855	1.17381	0.00280429	6.50846	0.194033	5.38983	8.22215	4.67245	0.115889	1.01086
2000	1348	99.9941	55.7666	0.15769	16.7854	1.17402	0.00280429	6.50827	0.194033	5.38982	8.22214	4.67244	0.115889	1.01086
2000	1347	99.9941	55.7666	0.15769	16.7854	1.17423	0.00280429	6.50808	0.194033	5.38982	8.22214	4.67244	0.115889	1.01086
2000	1346	99.9941	55.7666	0.15769	16.7854	1.17444	0.00280429	6.50789	0.194033	5.38982	8.22214	4.67244	0.115889	1.01086
2000	1345	99.9941	55.7665	0.15769	16.7854	1.17466	0.00280429	6.50769	0.194033	5.38982	8.22214	4.67244	0.115888	1.01086
2000	1344	99.9942	55.7665	0.15769	16.7854	1.17487	0.00280429	6.50749	0.194033	5.38982	8.22214	4.67244	0.115888	1.01085
2000	1343	99.9942	55.7665	0.15769	16.7854	1.17509	0.00280429	6.5073	0.194033	5.38982	8.22214	4.67244	0.115888	1.01085
2000	1342	99.9942	55.7665	0.15769	16.7854	1.17531	0.00280429	6.5071	0.194033	5.38982	8.22213	4.67244	0.115888	1.01085
2000	1341	99.9942	55.7665	0.15769	16.7854	1.17553	0.00280429	6.5069	0.194033	5.38982	8.22213	4.67244	0.115888	1.01085
2000	1340	99.9942	55.7665	0.15769	16.7854	1.17575	0.00280429	6.5067	0.194033	5.38981	8.22213	4.67244	0.115888	1.01085
2000	1339	99.9943	55.7665	0.15769	16.7854	1.17598	0.00280429	6.50649	0.194033	5.38981	8.22213	4.67243	0.115888	1.01085
2000	1338	99.9943	55.7665	0.15769	16.7854	1.1762	0.00280429	6.50629	0.194033	5.38981	8.22213	4.67243	0.115888	1.01085
2000	1337	99.9943	55.7664	0.15769	16.7854	1.17643	0.00280429	6.50608	0.194033	5.38981	8.22212	4.67243	0.115888	1.01085
2000	1336	99.9943	55.7664	0.15769	16.7854	1.17666	0.00280429	6.50587	0.194033	5.38981	8.22212	4.67243	0.115888	1.01085
2000	1335	99.9944	55.7664	0.15769	16.7854	1.17689	0.00280429	6.50566	0.194033	5.38981	8.22212	4.67243	0.115888	1.01085
2000	1334	99.9944	55.7664	0.15769	16.7854	1.17712	0.00280428	6.50545	0.194032	5.38981	8.22212	4.67243	0.115888	1.01085
2000	1333	99.9944	55.7664	0.15769	16.7854	1.17736	0.00280428	6.50524	0.194032	5.38981	8.22212	4.67243	0.115888	1.01085
2000	1332	99.9944	55.7664	0.15769	16.7854	1.17759	0.00280428	6.50503	0.194032	5.3898	8.22212	4.67243	0.115888	1.01085
2000	1331	99.9945	55.7664	0.15769	16.7854	1.17783	0.00280428	6.50481	0.194032	5.3898	8.22211	4.67243	0.115888	1.01085
2000	1330	99.9945	55.7664	0.15769	16.7854	1.17807	0.00280428	6.50459	0.194032	5.3898	8.22211	4.67243	0.115888	1.01085
2000	1329	99.9945	55.7663	0.15769	16.7854	1.17831	0.00280428	6.50437	0.194032	5.3898	8.22211	4.67242	0.115888	1.01085
2000	1328	99.9945	55.7663	0.15769	16.7854	1.17855	0.00280428	6.50415	0.194032	5.3898	8.22211	4.67242	0.115888	1.01085
2000	1327	99.9945	55.7663	0.157689	16.7854	1.1788	0.00280428	6.50393	0.194032	5.3898	8.22211	4.67242	0.115888	1.01085
2000	1326	99.9946	55.7663	0.157689	16.7854	1.17904	0.00280428	6.50371	0.194032	5.3898	8.2221	4.67242	0.115888	1.01085
2000	1325	99.9946	55.7663	0.157689	16.7854	1.17929	0.00280428	6.50348	0.194032	5.3898	8.2221	4.67242	0.115888	1.01085
2000	1324	99.9946	55.7663	0.157689	16.7854	1.17954	0.00280428	6.50326	0.194032	5.38979	8.2221	4.67242	0.115888	1.01085
2000	1323	99.9946	55.7663	0.157689	16.7854	1.17979	0.00280428	6.50303	0.194032	5.38979	8.2221	4.67242	0.115888	1.01085
2000	1322	99.9947	55.7662	0.157689	16.7853	1.18004	0.00280428	6.5028	0.194032	5.38979	8.2221	4.67242	0.115888	1.01085
2000	1321	99.9947	55.7662	0.157689	16.7853	1.1803	0.00280428	6.50257	0.194032	5.38979	8.22209	4.67241	0.115888	1.01085
2000	1320	99.9947	55.7662	0.157689	16.7853	1.18055	0.00280427	6.50234	0.194032	5.38979	8.22209	4.67241	0.115888	1.01085
2000	1319	99.9947	55.7662	0.157689	16.7853	1.18081	0.00280427	6.5021	0.194032	5.38979	8.22209	4.67241	0.115888	1.01085
2000	1318	99.9948	55.7662	0.157689	16.7853	1.18107	0.00280427	6.50187	0.194032	5.38979	8.22209	4.67241	0.115888	1.01085
2000	1317	99.9948	55.7662	0.157689	16.7853	1.18133	0.00280427	6.50163	0.194032	5.38978	8.22208	4.67241	0.115888	1.01085
2000	1316	99.9948	55.7662	0.157689	16.7853	1.1816	0.00280427	6.50139	0.194032	5.38978	8.22208	4.67241	0.115888	1.01085
2000	1315	99.9949	55.7661	0.157689	16.7853	1.18186	0.00280427	6.50115	0.194032	5.38978	8.22208	4.67241	0.115888	1.01085
2000	1314	99.9949	55.7661	0.157689	16.7853	1.18213	0.00280427	6.50091	0.194032	5.38978	8.22208	4.67241	0.115888	1.01085
2000	1313	99.9949	55.7661	0.157689	16.7853	1.18239	0.00280427	6.50067	0.194031	5.38978	8.22208	4.6724	0.115888	1.01085
2000	1312	99.9949	55.7661	0.157689	16.7853	1.18266	0.00280427	6.50042	0.194031	5.38978	8.22207	4.6724	0.115888	1.01085
2000	1311	99.995	55.7661	0.157689	16.7853	1.18294	0.00280427	6.50018	0.194031	5.38978	8.22207	4.6724	0.115888	1.01085
2000	1310	99.995	55.7661	0.157689	16.7853	1.18321	0.00280427	6.49993	0.194031	5.38977	8.22207	4.6724	0.115887	1.01085
2000	1309	99.995	55.766	0.157689	16.7853	1.18348	0.00280427	6.49968	0.194031	5.38977	8.22207	4.6724	0.115887	1.01085
2000	1308	99.995	55.766	0.157689	16.7853	1.18376	0.00280427	6.49943	0.194031	5.38977	8.22206	4.6724	0.115887	1.01085
2000	1307	99.9951	55.766	0.157689	16.7853	1.18404	0.00280427	6.49918	0.194031	5.38977	8.22206	4.6724	0.115887	1.01085
2000	1306	99.9951	55.766	0.157689	16.7853	1.18432	0.00280426	6.49892	0.194031	5.38977	8.22206	4.6724	0.115887	1.01085
2000	1305	99.9951	55.766	0.157689	16.7853	1.1846	0.00280426	6.49867	0.194031	5.38977	8.22206	4.67239	0.115887	1.01085
2000	1304	99.9952	55.766	0.157689	16.7853	1.18489	0.00280426	6.49841	0.194031	5.38977	8.22206	4.67239	0.115887	1.01084
2000	1303	99.9952	55.766	0.157688	16.7853	1.18517	0.00280426	6.49815	0.194031	5.38976	8.22205	4.67239	0.115887	1.01084
2000	1302	99.9952	55.7659	0.157688	16.7853	1.18546	0.00280426	6.49789	0.194031	5.38976	8.22205	4.67239	0.115887	1.01084
2000	1301	99.9952	55.7659	0.157688	16.7853	1.18575	0.00280426	6.49762	0.194031	5.38976	8.22205	4.67239	0.115887	1.01084
2000	1300	99.9953	55.7659	0.157688	16.7852	1.18604	0.00280426	6.49736	0.194031	5.38976	8.22205	4.67239	0.115887	1.01084
2000	1299	99.9953	55.7659	0.157688	16.7852	1.18633	0.00280426	6.49709	0.194031	5.38976	8.22204	4.67239	0.115887	1.01084
2000	1298	99.9953	55.7659	0.157688	16.7852	1.18663	0.00280426	6.49683	0.194031	5.38976	8.22204	4.67239	0.115887	1.01084
2000	1297	99.9954	55.7659	0.157688	16.7852	1.18693	0.00280426	6.49656	0.194031	5.38975	8.22204	4.67238	0.115887	1.01084
2000	1296	99.9954	55.7658	0.157688	16.7852	1.18722	0.00280426	6.49629	0.194031	5.38975	8.22204	4.67238	0.115887	1.01084
2000	1295	99.9954	55.7658	0.157688	16.7852	1.18752	0.00280426	6.49601	0.19403	5.38975	8.22203	4.67238	0.115887	1.01084
2000	1294	99.9955	55.7658	0.157688	16.7852	1.18783	0.00280425	6.49574	0.19403	5.38975	8.22203	4.67238	0.115887	1.01084
2000	1293	99.9955	55.7658	0.157688	16.7852	1.18813	0.00280425	6.49546	0.19403	5.38975	8.22203	4.67238	0.115887	1.01084
2000	1292	99.9955	55.7658	0.157688	16.7852	1.18844	0.00280425	6.49519	0.19403	5.38975	8.22203	4.67238	0.115887	1.01084
2000	1291	99.9955	55.7658	0.157688	16.7852	1.18874	0.00280425	6.49491	0.19403	5.38974	8.22202	4.67238	0.115887	1.01084
2000	1290	99.9956	55.7657	0.157688	16.7852	1.18905	0.00280425	6.49463	0.19403	5.38974	8.22202	4.67237	0.115887	1.01084
2000	1289	99.9956	55.7657	0.157688	16.7852	1.18937	0.00280425	6.49434	0.19403	5.38974	8.22202	4.67237	0.115887	1.01084
2000	1288	99.9956	55.7657	0.157688	16.7852	1.18968	0.00280425	6.49406	0.19403	5.38974	8.22202	4.67237	0.115887	1.01084
2000	1287	99.9957	55.7657	0.157688	16.7852	1.18999	0.00280425	6.49377	0.19403	5.38974	8.22201	4.67237	0.115887	1.01084
2000	1286	99.9957	55.7657	0.157688	16.7852	1.19031	0.00280425	6.49349	0.19403	5.38974	8.22201	4.67237	0.115887	1.01084
2000	1285	99.9957	55.7657	0.157688	16.7852	1.19063	0.00280425	6.4932	0.19403	5.38973	8.22201	4.67237	0.115887	1.01084
2000	1284	99.9958	55.7656	0.157688	16.7852	1.19095	0.00280425	6.49291	0.19403	5.38973	8.22201	4.67236	0.115887	1.01084
2000	1283	99.9958	55.7656	0.157687	16.7852	1.19127	0.00280424	6.49261	0.19403	5.38973	8.222	4.67236	0.115887	1.01084
2000	1282	99.9958	55.7656	0.157687	16.7852	1.1916	0.00280424	6.49232	0.19403	5.38973	8.222	4.67236	0.115887	1.01084
2000	1281	99.9959	55.7656	0.157687	16.7851	1.19192	0.00280424	6.49202	0.19403	5.38973	8.222	4.67236	0.115886	1.01084
2000	1280	99.9959	55.7656	0.157687	16.7851	1.19225	0.00280424	6.49172	0.19403	5.38973	8.22199	4.67236	0.115886	1.01084
2000	1279	99.9959	55.7655	0.157687	16.7851	1.19258	0.00280424	6.49142	0.194029	5.38972	8.22199	4.67236	0.115886	1.01084
2000	1278	99.996	55.7655	0.157687	16.7851	1.19292	0.00280424	6.49112	0.194029	5.38972	8.22199	4.67236	0.115886	1.01084
2000	1277	99.996	55.7655	0.157687	16.7851	1.19325	0.00280424	6.49082	0.194029	5.38972	8.22199	4.67235	0.115886	1.01084
2000	1276	99.996	55.7655	0.157687	16.7851	1.19359	0.00280424	6.49051	0.194029	5.38972	8.22198	4.67235	0.115886	1.01084
2000	1275	99.9961	55.7655	0.157687	16.7851	1.19392	0.00280424	6.49021	0.194029	5.38972	8.22198	4.67235	0.115886	1.01084
2000	1274	99.9961	55.7654	0.157687	16.7851	1.19427	0.00280424	6.4899	0.194029	5.38971	8.22198	4.67235	0.115886	1.01084
2000	1273	99.9961	55.7654	0.157687	16.7851	1.19461	0.00280424	6.48959	0.194029	5.38971	8.22197	4.67235	0.115886	1.01083
2000	1272	99.9962	55.7654	0.157687	16.7851	1.19495	0.00280423	6.48928	0.194029	5.38971	8.22197	4.67235	0.115886	1.01083
2000	1271	99.9962	55.7654	0.157687	16.7851	1.1953	0.00280423	6.48896	0.194029	5.38971	8.22197	4.67234	0.115886	1.01083
2000	1270	99.9962	55.7654	0.157687	16.7851	1.19565	0.00280423	6.48865	0.194029	5.38971	8.22197	4.67234	0.115886	1.01083
2000	1269	99.9963	55.7654	0.157687	16.7851	1.196	0.00280423	6.48833	0.194029	5.38971	8.22196	4.67234	0.115886	1.01083
2000	1268	99.9963	55.7653	0.157687	16.7851	1.19635	0.00280423	6.48801	0.194029	5.3897	8.22196	4.67234	0.115886	1.01083
2000	1267	99.9963	55.7653	0.157687	16.7851	1.1967	0.00280423	6.48769	0.194029	5.3897	8.22196	4.67234	0.115886	1.01083
2000	1266	99.9964	55.7653	0.157687	16.7851	1.19706	0.00280423	6.48736	0.194029	5.3897	8.22195	4.67234	0.115886	1.01083
2000	1265	99.9964	55.7653	0.157687	16.7851	1.19742	0.00280423	6.48704	0.194029	5.3897	8.22195	4.67233	0.115886	1.01083
2000	1264	99.9965	55.7653	0.157686	16.785	1.19778	0.00280423	6.48671	0.194028	5.3897	8.22195	4.67233	0.115886	1.01083
2000	1263	99.9965	55.7652	0.157686	16.785	1.19814	0.00280423	6.48638	0.194028	5.38969	8.22195	4.67233	0.115886	1.01083
2000	1262	99.9965	55.7652	0.157686	16.785	1.1985	0.00280422	6.48605	0.194028	5.38969	8.22194	4.67233	0.115886	1.01083
2000	1261	99.9966	55.7652	0.157686	16.785	1.19887	0.00280422	6.48572	0.194028	5.38969	8.22194	4.67233	0.115886	1.01083
2000	1260	99.9966	55.7652	0.157686	16.785	1.19924	0.00280422	6.48539	0.194028	5.38969	8.22194	4.67233	0.115886	1.01083
2000	1259	99.9966	55.7651	0.157686	16.785	1.19961	0.00280422	6.48505	0.194028	5.38969	8.22193	4.67232	0.115886	1.01083
2000	1258	99.9967	55.7651	0.157686	16.785	1.19998	0.00280422	6.48471	0.194028	5.38968	8.22193	4.67232	0.115886	1.01083
2000	1257	99.9967	55.7651	0.157686	16.785	1.20035	0.00280422	6.48437	0.194028	5.38968	8.22193	4.67232	0.115885	1.01083
2000	1256	99.9967	55.7651	0.157686	16.785	1.20073	0.00280422	6.48403	0.194028	5.38968	8.22192	4.67232	0.115885	1.01083
2000	1255	99.9968	55.7651	0.157686	16.785	1.20111	0.00280422	6.48369	0.194028	5.38968	8.22192	4.67232	0.115885	1.01083
2000	1254	99.9968	55.765	0.157686	16.785	1.20149	0.00280422	6.48334	0.194028	5.38968	8.22192	4.67232	0.115885	1.01083
2000	1253	99.9969	55.765	0.157686	16.785	1.20187	0.00280421	6.483	0.194028	5.38967	8.22192	4.67231	0.115885	1.01083
2000	1252	99.9969	55.765	0.157686	16.785	1.20226	0.00280421	6.48265	0.194028	5.38967	8.22191	4.67231	0.115885	1.01083
2000	1251	99.9969	55.765	0.157686	16.785	1.20264	0.00280421	6.4823	0.194028	5.38967	8.22191	4.67231	0.115885	1.01083
2000	1250	99.997	55.765	0.157686	16.785	1.20303	0.00280421	6.48194	0.194027	5.38967	8.22191	4.67231	0.115885	1.01083
2000	1249	99.997	55.7649	0.157686	16.785	1.20342	0.00280421	6.48159	0.194027	5.38967	8.2219	4.67231	0.115885	1.01083
2000	1248	99.9971	55.7649	0.157686	16.7849	1.20382	0.00280421	6.48123	0.194027	5.38966	8.2219	4.6723	0.115885	1.01083
2000	1247	99.9971	55.7649	0.157685	16.7849	1.20421	0.00280421	6.48087	0.194027	5.38966	8.2219	4.6723	0.115885	1.01083
2000	1246	99.9971	55.7649	0.157685	16.7849	1.20461	0.00280421	6.48051	0.194027	5.38966	8.22189	4.6723	0.115885	1.01082
2000	1245	99.9972	55.7648	0.157685	16.7849	1.20501	0.00280421	6.48015	0.194027	5.38966	8.22189	4.6723	0.115885	1.01082
2000	1244	99.9972	55.7648	0.157685	16.7849	1.20541	0.0028042	6.47979	0.194027	5.38965	8.22189	4.6723	0.115885	1.01082
2000	1243	99.9973	55.7648	0.157685	16.7849	1.20581	0.0028042	6.47942	0.194027	5.38965	8.22188	4.6723	0.115885	1.01082
2000	1242	99.9973	55.7648	0.157685	16.7849	1.20622	0.0028042	6.47905	0.194027	5.38965	8.22188	4.67229	0.115885	1.01082
2000	1241	99.9973	55.7648	0.157685	16.7849	1.20663	0.0028042	6.47868	0.194027	5.38965	8.22188	4.67229	0.115885	1.01082
2000	1240	99.9974	55.7647	0.157685	16.7849	1.20704	0.0028042	6.47831	0.194027	5.38965	8.22187	4.67229	0.115885	1.01082
2000	1239	99.9974	55.7647	0.157685	16.7849	1.20745	0.0028042	6.47793	0.194027	5.38964	8.22187	4.67229	0.115885	1.01082
2000	1238	99.9975	55.7647	0.157685	16.7849	1.20786	0.0028042	6.47756	0.194027	5.38964	8.22187	4.67229	0.115885	1.01082
2000	1237	99.9975	55.7647	0.157685	16.7849	1.20828	0.0028042	6.47718	0.194026	5.38964	8.22186	4.67228	0.115885	1.01082
2000	1236	99.9975	55.7646	0.157685	16.7849	1.2087	0.0028042	6.4768	0.194026	5.38964	8.22186	4.67228	0.115885	1.01082
2000	1235	99.9976	55.7646	0.157685	16.7849	1.20912	0.00280419	6.47642	0.194026	5.38963	8.22186	4.67228	0.115884	1.01082
2000	1234	99.9976	55.7646	0.157685	16.7848	1.20955	0.00280419	6.47603	0.194026	5.38963	8.22185	4.67228	0.115884	1.01082
2000	1233	99.9977	55.7646	0.157685	16.7848	1.20997	0.00280419	6.47565	0.194026	5.38963	8.22185	4.67228	0.115884	1.01082
2000	1232	99.9977	55.7645	0.157684	16.7848	1.2104	0.00280419	6.47526	0.194026	5.38963	8.22184	4.67227	0.115884	1.01082
2000	1231	99.9978	55.7645	0.157684	16.7848	1.21083	0.00280419	6.47487	0.194026	5.38962	8.22184	4.67227	0.115884	1.01082
2000	1230	99.9978	55.7645	0.157684	16.7848	1.21126	0.00280419	6.47448	0.194026	5.38962	8.22184	4.67227	0.115884	1.01082
2000	1229	99.9978	55.7645	0.157684	16.7848	1.2117	0.00280419	6.47408	0.194026	5.38962	8.22183	4.67227	0.115884	1.01082
2000	1228	99.9979	55.7644	0.157684	16.7848	1.21213	0.00280419	6.47368	0.194026	5.38962	8.22183	4.67227	0.115884	1.01082
2000	1227	99.9979	55.7644	0.157684	16.7848	1.21257	0.00280418	6.47329	0.194026	5.38962	8.22183	4.67226	0.115884	1.01082
2000	1226	99.998	55.7644	0.157684	16.7848	1.21301	0.00280418	6.47289	0.194026	5.38961	8.22182	4.67226	0.115884	1.01082
2000	1225	99.998	55.7644	0.157684	16.7848	1.21346	0.00280418	6.47248	0.194025	5.38961	8.22182	4.67226	0.115884	1.01082
2000	1224	99.9981	55.7643	0.157684	16.7848	1.2139	0.00280418	6.47208	0.194025	5.38961	8.22182	4.67226	0.115884	1.01082
2000	1223	99.9981	55.7643	0.157684	16.7848	1.21435	0.00280418	6.47167	0.194025	5.38961	8.22181	4.67226	0.115884	1.01081
2000	1222	99.9982	55.7643	0.157684	16.7848	1.2148	0.00280418	6.47126	0.194025	5.3896	8.22181	4.67225	0.115884	1.01081
2000	1221	99.9982	55.7643	0.157684	16.7848	1.21526	0.00280418	6.47085	0.194025	5.3896	8.2218	4.67225	0.115884	1.01081
2000	1220	99.9982	55.7642	0.157684	16.7847	1.21571	0.00280418	6.47044	0.194025	5.3896	8.2218	4.67225	0.115884	1.01081
2000	1219	99.9983	55.7642	0.157684	16.7847	1.21617	0.00280417	6.47002	0.194025	5.3896	8.2218	4.67225	0.115884	1.01081
2000	1218	99.9983	55.7642	0.157683	16.7847	1.21663	0.00280417	6.46961	0.194025	5.38959	8.22179	4.67224	0.115884	1.01081
2000	1217	99.9984	55.7642	0.157683	16.7847	1.21709	0.00280417	6.46919	0.194025	5.38959	8.22179	4.67224	0.115884	1.01081
2000	1216	99.9984	55.7641	0.157683	16.7847	1.21755	0.00280417	6.46877	0.194025	5.38959	8.22179	4.67224	0.115883	1.01081
2000	1215	99.9985	55.7641	0.157683	16.7847	1.21802	0.00280417	6.46834	0.194025	5.38959	8.22178	4.67224	0.115883	1.01081
2000	1214	99.9985	55.7641	0.157683	16.7847	1.21849	0.00280417	6.46792	0.194024	5.38958	8.22178	4.67224	0.115883	1.01081
2000	1213	99.9986	55.7641	0.157683	16.7847	1.21896	0.00280417	6.46749	0.194024	5.38958	8.22177	4.67223	0.115883	1.01081
2000	1212	99.9986	55.764	0.157683	16.7847	1.21944	0.00280417	6.46706	0.194024	5.38958	8.22177	4.67223	0.115883	1.01081
2000	1211	99.9987	55.764	0.157683	16.7847	1.21991	0.00280416	6.46663	0.194024	5.38958	8.22177	4.67223	0.115883	1.01081
2000	1210	99.9987	55.764	0.157683	16.7847	1.22039	0.00280416	6.46619	0.194024	5.38957	8.22176	4.67223	0.115883	1.01081
2000	1209	99.9988	55.764	0.157683	16.7847	1.22087	0.00280416	6.46575	0.194024	5.38957	8.22176	4.67222	0.115883	1.01081
2000	1208	99.9988	55.7639	0.157683	16.7847	1.22136	0.00280416	6.46532	0.194024	5.38957	8.22175	4.67222	0.115883	1.01081
2000	1207	99.9989	55.7639	0.157683	16.7846	1.22184	0.00280416	6.46487	0.194024	5.38957	8.22175	4.67222	0.115883	1.01081
2000	1206	99.9989	55.7639	0.157683	16.7846	1.22233	0.00280416	6.46443	0.194024	5.38956	8.22175	4.67222	0.115883	1.01081
2000	1205	99.999	55.7638	0.157683	16.7846	1.22282	0.00280416	6.46399	0.194024	5.38956	8.22174	4.67222	0.115883	1.01081
2000	1204	99.999	55.7638	0.157682	16.7846	1.22331	0.00280415	6.46354	0.194024	5.38956	8.22174	4.67221	0.115883	1.01081
2000	1203	99.9991	55.7638	0.157682	16.7846	1.22381	0.00280415	6.46309	0.194023	5.38955	8.22173	4.67221	0.115883	1.01081
2000	1202	99.9991	55.7638	0.157682	16.7846	1.22431	0.00280415	6.46264	0.194023	5.38955	8.22173	4.67221	0.115883	1.0108
2000	1201	99.9992	55.7637	0.157682	16.7846	1.22481	0.00280415	6.46218	0.194023	5.38955	8.22173	4.67221	0.115883	1.0108
2000	1200	99.9992	55.7637	0.157682	16.7846	1.22531	0.00280415	6.46173	0.194023	5.38955	8.22172	4.6722	0.115883	1.0108
2000	1199	99.9993	55.7637	0.157682	16.7846	1.22582	0.00280415	6.46127	0.194023	5.38954	8.22172	4.6722	0.115883	1.0108
2000	1198	99.9993	55.7637	0.157682	16.7846	1.22633	0.00280415	6.46081	0.194023	5.38954	8.22171	4.6722	0.115882	1.0108
2000	1197	99.9994	55.7636	0.157682	16.7846	1.22684	0.00280414	6.46034	0.194023	5.38954	8.22171	4.6722	0.115882	1.0108
2000	1196	99.9994	55.7636	0.157682	16.7845	1.22735	0.00280414	6.45988	0.194023	5.38954	8.2217	4.67219	0.115882	1.0108
2000	1195	99.9995	55.7636	0.157682	16.7845	1.22786	0.00280414	6.45941	0.194023	5.38953	8.2217	4.67219	0.115882	1.0108
2000	1194	99.9995	55.7635	0.157682	16.7845	1.22838	0.00280414	6.45894	0.194023	5.38953	8.2217	4.67219	0.115882	1.0108
2000	1193	99.9996	55.7635	0.157682	16.7845	1.2289	0.00280414	6.45847	0.194022	5.38953	8.22169	4.67219	0.115882	1.0108
2000	1192	99.9996	55.7635	0.157681	16.7845	1.22943	0.00280414	6.45799	0.194022	5.38952	8.22169	4.67218	0.115882	1.0108
2000	1191	99.9997	55.7635	0.157681	16.7845	1.22995	0.00280414	6.45752	0.194022	5.38952	8.22168	4.67218	0.115882	1.0108
2000	1190	99.9997	55.7634	0.157681	16.7845	1.23048	0.00280413	6.45704	0.194022	5.38952	8.22168	4.67218	0.115882	1.0108
2000	1189	99.9998	55.7634	0.157681	16.7845	1.23101	0.00280413	6.45655	0.194022	5.38952	8.22167	4.67218	0.115882	1.0108
2000	1188	99.9998	55.7634	0.157681	16.7845	1.23154	0.00280413	6.45607	0.194022	5.38951	8.22167	4.67217	0.115882	1.0108
2000	1187	99.9999	55.7633	0.157681	16.7845	1.23208	0.00280413	6.45558	0.194022	5.38951	8.22167	4.67217	0.115882	1.0108
2000	1186	99.9999	55.7633	0.157681	16.7845	1.23262	0.00280413	6.4551	0.194022	5.38951	8.22166	4.67217	0.115882	1.0108
2000	1185	100	55.7633	0.157681	16.7845	1.23316	0.00280413	6.4546	0.194022	5.3895	8.22166	4.67217	0.115882	1.0108
2000	1184	100	55.7632	0.157681	16.7844	1.2337	0.00280413	6.45411	0.194021	5.3895	8.22165	4.67216	0.115882	1.0108
2000	1183	100	55.7632	0.157681	16.7844	1.23425	0.00280412	6.45362	0.194021	5.3895	8.22165	4.67216	0.115882	1.01079
2000	1182	100	55.7632	0.157681	16.7844	1.2348	0.00280412	6.45312	0.194021	5.3895	8.22164	4.67216	0.115881	1.01079
2000	1181	100	55.7631	0.157681	16.7844	1.23535	0.00280412	6.45262	0.194021	5.38949	8.22164	4.67216	0.115881	1.01079
2000	1180	100	55.7631	0.15768	16.7844	1.2359	0.00280412	6.45211	0.194021	5.38949	8.22163	4.67215	0.115881	1.01079
2000	1179	100	55.7631	0.15768	16.7844	1.23646	0.00280412	6.45161	0.194021	5.38949	8.22163	4.67215	0.115881	1.01079
2000	1178	100	55.7631	0.15768	16.7844	1.23702	0.00280412	6.4511	0.194021	5.38948	8.22163	4.67215	0.115881	1.01079
2000	1177	100	55.763	0.15768	16.7844	1.23758	0.00280411	6.45059	0.194021	5.38948	8.22162	4.67215	0.115881	1.01079
2000	1176	100.001	55.763	0.15768	16.7844	1.23815	0.00280411	6.45008	0.194021	5.38948	8.22162	4.67214	0.115881	1.01079
2000	1175	100.001	55.763	0.15768	16.7844	1.23872	0.00280411	6.44956	0.194021	5.38947	8.22161	4.67214	0.115881	1.01079
2000	1174	100.001	55.7629	0.15768	16.7843	1.23929	0.00280411	6.44905	0.19402	5.38947	8.22161	4.67214	0.115881	1.01079
2000	1173	100.001	55.7629	0.15768	16.7843	1.23986	0.00280411	6.44853	0.19402	5.38947	8.2216	4.67214	0.115881	1.01079
2000	1172	100.001	55.7629	0.15768	16.7843	1.24043	0.00280411	6.448	0.19402	5.38946	8.2216	4.67213	0.115881	1.01079
2000	1171	100.001	55.7628	0.15768	16.7843	1.24101	0.0028041	6.44748	0.19402	5.38946	8.22159	4.67213	0.115881	1.01079
2000	1170	100.001	55.7628	0.15768	16.7843	1.24159	0.0028041	6.44695	0.19402	5.38946	8.22159	4.67213	0.115881	1.01079
2000	1169	100.001	55.7628	0.157679	16.7843	1.24218	0.0028041	6.44642	0.19402	5.38946	8.22158	4.67212	0.115881	1.01079
2000	1168	100.001	55.7627	0.157679	16.7843	1.24276	0.0028041	6.44589	0.19402	5.38945	8.22158	4.67212	0.115881	1.01079
2000	1167	100.001	55.7627	0.157679	16.7843	1.24335	0.0028041	6.44536	0.19402	5.38945	8.22157	4.67212	0.11588	1.01079
2000	1166	100.001	55.7627	0.157679	16.7843	1.24395	0.0028041	6.44482	0.194019	5.38945	8.22157	4.67212	0.11588	1.01078
2000	1165	100.001	55.7626	0.157679	16.7843	1.24454	0.00280409	6.44428	0.194019	5.38944	8.22156	4.67211	0.11588	1.01078
2000	1164	100.001	55.7626	0.157679	16.7843	1.24514	0.00280409	6.44374	0.194019	5.38944	8.22156	4.67211	0.11588	1.01078
2000	1163	99.7474	55.7649	0.15804	16.8211	1.24513	0.00281123	6.43371	0.194513	5.32939	8.2369	4.68393	0.116175	1.01336
2000	1162	99.6254	55.7661	0.158214	16.8389	1.24543	0.00281467	6.42855	0.194751	5.30045	8.24427	4.68963	0.116317	1.0146
2000	1161	98.6388	55.8028	0.159746	16.7859	1.25314	0.00284282	6.45988	0.196699	5.26078	8.22356	4.71254	0.11738	1.02474
2000	1160	97.7223	55.8371	0.161195	16.7373	1.26038	0.00286949	6.48885	0.198544	5.22201	8.20462	4.73431	0.118386	1.03436
2000	1159	96.8226	55.8714	0.162645	16.6889	1.26761	0.00289615	6.51766	0.200389	5.18348	8.18575	4.75598	0.11939	1.04397
2000	1158	95.9393	55.9055	0.164095	16.6405	1.27483	0.00292281	6.54631	0.202234	5.14518	8.16696	4.77755	0.120394	1.05358
2000	1157	95.0039	55.9446	0.165515	16.6199	1.2807	0.00295159	6.57474	0.204225	5.09849	8.1188	4.80461	0.121495	1.06395
2000	1156	94.0962	55.9829	0.166937	16.5955	1.28672	0.00298006	6.60301	0.206195	5.05335	8.07486	4.83075	0.12258	1.07422
2000	1155	93.2066	56.021	0.168355	16.5709	1.29273	0.00300851	6.63112	0.208163	5.00862	8.03123	4.85672	0.123664	1.08447
2000	1154	92.3344	56.0589	0.169771	16.5463	1.29872	0.00303692	6.65907	0.210129	4.96428	7.9879	4.88251	0.124745	1.09471
2000	1153	91.4554	56.0992	0.171225	16.5223	1.30402	0.00306611	6.68247	0.212149	4.92017	7.94521	4.90914	0.125855	1.10523
2000	1152	90.5883	56.1395	0.17269	16.4976	1.30934	0.00309546	6.70565	0.21418	4.87597	7.90347	4.93572	0.12697	1.11581
2000	1151	89.7381	56.1796	0.174152	16.4728	1.31464	0.00312479	6.72867	0.216209	4.83217	7.86201	4.96213	0.128083	1.12638
2000	1150	88.9044	56.2195	0.175612	16.4479	1.31992	0.00315409	6.75154	0.218236	4.78876	7.82082	4.98837	0.129194	1.13695
2000	1149	88.0866	56.2593	0.177068	16.4228	1.32519	0.00318337	6.77425	0.220262	4.74574	7.77991	5.01445	0.130303	1.1475
2000	1148	87.2844	56.2989	0.178522	16.3976	1.33045	0.00321263	6.79682	0.222287	4.70311	7.73928	5.04037	0.131409	1.15805
2000	1147	86.4972	56.3382	0.179974	16.3723	1.33569	0.00324187	6.81924	0.22431	4.66086	7.69892	5.06612	0.132513	1.16859
2000	1146	85.7247	56.3774	0.181422	16.3469	1.34091	0.00327108	6.84152	0.226331	4.61899	7.65882	5.09171	0.133616	1.17912
2000	1145	84.9665	56.4164	0.182868	16.3213	1.34613	0.00330027	6.86366	0.228351	4.57749	7.619	5.11714	0.134716	1.18964
2000	1144	84.222	56.4553	0.184312	16.2956	1.35132	0.00332945	6.88565	0.230369	4.53636	7.57944	5.1424	0.135814	1.20016
2000	1143	83.4911	56.4939	0.185753	16.2697	1.35651	0.0033586	6.90751	0.232386	4.4956	7.54014	5.16752	0.13691	1.21066
2000	1142	82.7732	56.5324	0.187192	16.2438	1.36169	0.00338772	6.92923	0.234402	4.45519	7.5011	5.19247	0.138004	1.22116
2000	1141	82.068	56.5707	0.188628	16.2177	1.36685	0.00341683	6.95082	0.236416	4.41515	7.46233	5.21727	0.139095	1.23166
2000	1140	81.3752	56.6088	0.190062	16.1915	1.372	0.00344592	6.97227	0.238428	4.37546	7.4238	5.24191	0.140185	1.24214
2000	1139	80.6945	56.6467	0.191493	16.1652	1.37714	0.00347499	6.9936	0.24044	4.33612	7.38553	5.2664	0.141273	1.25262
2000	1138	80.0256	56.6845	0.192922	16.1387	1.38227	0.00350404	7.0148	0.24245	4.29713	7.34751	5.29074	0.142359	1.26309
2000	1137	79.368	56.7221	0.194349	16.1122	1.38738	0.00353307	7.03587	0.244458	4.25848	7.30975	5.31492	0.143443	1.27356
2000	1136	78.7216	56.7595	0.195774	16.0855	1.39249	0.00356208	7.05681	0.246466	4.22017	7.27222	5.33896	0.144524	1.28401
2000	1135	78.086	56.7967	0.197196	16.0587	1.39759	0.00359107	7.07763	0.248472	4.1822	7.23495	5.36285	0.145604	1.29446
2000	1134	77.461	56.8338	0.198616	16.0318	1.40268	0.00362005	7.09834	0.250476	4.14456	7.19792	5.38659	0.146682	1.30491
2000	1133	76.8463	56.8707	0.200035	16.0048	1.40775	0.003649	7.11892	0.25248	4.10725	7.16112	5.41018	0.147758	1.31535
2000	1132	76.2417	56.9074	0.201451	15.9777	1.41282	0.00367794	7.13938	0.254482	4.07027	7.12457	5.43363	0.148832	1.32578
2000	1131	75.6468	56.944	0.202865	15.9505	1.41788	0.00370687	7.15973	0.256483	4.0336	7.08826	5.45693	0.149904	1.3362
2000	1130	75.0615	56.9804	0.204277	15.9231	1.42293	0.00373577	7.17996	0.258484	3.99726	7.05218	5.48009	0.150974	1.34662
2000	1129	74.4855	57.0166	0.205687	15.8957	1.42798	0.00376466	7.20008	0.260482	3.96123	7.01633	5.50311	0.152042	1.35704
2000	1128	73.9186	57.0526	0.207095	15.8681	1.43301	0.00379354	7.22009	0.26248	3.92552	6.98071	5.52599	0.153109	1.36745
2000	1127	73.3605	57.0885	0.208502	15.8405	1.43804	0.00382239	7.23999	0.264477	3.89011	6.94533	5.54873	0.154173	1.37785
2000	1126	72.8111	57.1242	0.209906	15.8127	1.44306	0.00385124	7.25978	0.266473	3.85501	6.91017	5.57133	0.155236	1.38824
2000	1125	72.2701	57.1598	0.211309	15.7849	1.44807	0.00388007	7.27946	0.268467	3.82022	6.87523	5.59379	0.156297	1.39864
2000	1124	71.7374	57.1952	0.21271	15.7569	1.45308	0.00390888	7.29904	0.270461	3.78572	6.84052	5.61611	0.157356	1.40902
2000	1123	71.2127	57.2304	0.214109	15.7288	1.45808	0.00393768	7.31851	0.272454	3.75152	6.80603	5.6383	0.158413	1.4194
2000	1122	70.6959	57.2655	0.215506	15.7007	1.46307	0.00396647	7.33787	0.274446	3.71761	6.77176	5.66036	0.159468	1.42978
2000	1121	70.1867	57.3004	0.216902	15.6724	1.46806	0.00399524	7.35714	0.276436	3.68399	6.73771	5.68228	0.160522	1.44015
2000	1120	69.6851	57.3351	0.218297	15.6441	1.47304	0.004024	7.3763	0.278426	3.65066	6.70388	5.70407	0.161573	1.45052
2000	1119	69.1908	57.3697	0.219689	15.6157	1.47802	0.00405275	7.39537	0.280415	3.61762	6.67026	5.72572	0.162623	1.46088
2000	1118	68.7036	57.4041	0.22108	15.5871	1.48299	0.00408148	7.41434	0.282404	3.58486	6.63685	5.74725	0.163672	1.47124
2000	1117	68.2235	57.4384	0.22247	15.5585	1.48795	0.00411021	7.43321	0.284391	3.55237	6.60365	5.76865	0.164718	1.4816
2000	1116	67.7502	57.4725	0.223858	15.5298	1.49291	0.00413892	7.45198	0.286378	3.52016	6.57066	5.78991	0.165763	1.49195
2000	1115	67.2836	57.5065	0.225245	15.501	1.49787	0.00416762	7.47066	0.288364	3.48823	6.53788	5.81105	0.166806	1.50229
2000	1114	66.8236	57.5403	0.22663	15.4721	1.50282	0.00419631	7.48924	0.290349	3.45656	6.50531	5.83207	0.167848	1.51263
2000	1113	66.3699	57.5739	0.228014	15.4431	1.50776	0.004225	7.50774	0.292334	3.42517	6.47294	5.85296	0.168887	1.52297
2000	1112	65.9226	57.6074	0.229396	15.414	1.5127	0.00425367	7.52614	0.294317	3.39403	6.44077	5.87372	0.169925	1.53331
2000	1111	65.4813	57.6407	0.230778	15.3849	1.51764	0.00428233	7.54445	0.296301	3.36316	6.4088	5.89436	0.170962	1.54364
2000	1110	65.0461	57.6739	0.232158	15.3557	1.52258	0.00431099	7.56267	0.298283	3.33255	6.37703	5.91488	0.171997	1.55397
2000	1109	64.6167	57.7069	0.233536	15.3263	1.52751	0.00433963	7.5808	0.300265	3.3022	6.34546	5.93527	0.17303	1.56429
2000	1108	64.1931	57.7398	0.234914	15.2969	1.53243	0.00436827	7.59885	0.302247	3.2721	6.31409	5.95554	0.174061	1.57462
2000	1107	63.7751	57.7726	0.23629	15.2675	1.53736	0.0043969	7.61681	0.304228	3.24225	6.28291	5.9757	0.175091	1.58494
2000	1106	63.3626	57.8051	0.237666	15.2379	1.54228	0.00442552	7.63468	0.306208	3.21266	6.25192	5.99573	0.176119	1.59526
2000	1105	62.9556	57.8376	0.23904	15.2083	1.5472	0.00445414	7.65247	0.308188	3.18331	6.22113	6.01565	0.177146	1.60557
2000	1104	62.5538	57.8699	0.240413	15.1786	1.55211	0.00448275	7.67017	0.310168	3.1542	6.19052	6.03545	0.178171	1.61588
2000	1103	62.1572	57.902	0.241785	15.1488	1.55703	0.00451135	7.68779	0.312147	3.12533	6.1601	6.05513	0.179195	1.62619
2000	1102	61.7656	57.934	0.243156	15.1189	1.56194	0.00453995	7.70533	0.314126	3.09671	6.12987	6.0747	0.180217	1.6365
2000	1101	61.3791	57.9659	0.244526	15.0889	1.56685	0.00456854	7.72279	0.316104	3.06832	6.09982	6.09415	0.181237	1.64681
2000	1100	60.9974	57.9976	0.245895	15.0589	1.57175	0.00459713	7.74017	0.318082	3.04017	6.06996	6.11349	0.182256	1.65711
2000	1099	60.6205	58.0292	0.247263	15.0288	1.57666	0.00462571	7.75747	0.32006	3.01224	6.04028	6.13271	0.183274	1.66742
2000	1098	60.2482	58.0606	0.248631	14.9987	1.58156	0.00465429	7.77468	0.322037	2.98455	6.01078	6.15183	0.18429	1.67772
2000	1097	59.8806	58.0919	0.249997	14.9684	1.58647	0.00468287	7.79183	0.324014	2.95709	5.98146	6.17083	0.185304	1.68802
2000	1096	59.5174	58.123	0.251363	14.9381	1.59137	0.00471144	7.80889	0.325991	2.92985	5.95232	6.18972	0.186317	1.69832
2000	1095	59.1587	58.154	0.252728	14.9078	1.59627	0.00474001	7.82588	0.327968	2.90284	5.92335	6.2085	0.187329	1.70862
2000	1094	58.8043	58.1849	0.254092	14.8773	1.60116	0.00476857	7.84279	0.329945	2.87604	5.89456	6.22717	0.188339	1.71891
2000	1093	58.4542	58.2156	0.255455	14.8468	1.60606	0.00479714	7.85962	0.331921	2.84947	5.86594	6.24574	0.189347	1.72921
2000	1092	58.1082	58.2462	0.256818	14.8163	1.61096	0.0048257	7.87638	0.333897	2.82311	5.8375	6.26419	0.190355	1.73951
2000	1091	57.7663	58.2766	0.25818	14.7856	1.61586	0.00485426	7.89307	0.335873	2.79697	5.80922	6.28255	0.19136	1.7498
2000	1090	57.4284	58.307	0.259542	14.7549	1.62075	0.00488282	7.90968	0.33785	2.77104	5.78112	6.30079	0.192365	1.7601
2000	1089	57.0944	58.3371	0.260903	14.7241	1.62565	0.00491138	7.92622	0.339826	2.74532	5.75318	6.31893	0.193368	1.77039
2000	1088	56.7643	58.3672	0.262263	14.6933	1.63054	0.00493994	7.94269	0.341802	2.71981	5.72541	6.33697	0.194369	1.78069
2000	1087	56.438	58.3971	0.263623	14.6624	1.63544	0.00496851	7.95909	0.343778	2.6945	5.69781	6.3549	0.195369	1.79098
2000	1086	56.1155	58.4269	0.264982	14.6315	1.64033	0.00499707	7.97541	0.345754	2.6694	5.67037	6.37273	0.196368	1.80128
2000	1085	55.7965	58.4565	0.266341	14.6005	1.64523	0.00502563	7.99167	0.34773	2.64451	5.6431	6.39046	0.197365	1.81157
2000	1084	55.4812	58.4861	0.267699	14.5694	1.65013	0.00505419	8.00785	0.349707	2.61981	5.61598	6.40809	0.198362	1.82187
2000	1083	55.1694	58.5154	0.269057	14.5383	1.65502	0.00508276	8.02397	0.351683	2.59531	5.58903	6.42562	0.199356	1.83217
2000	1082	54.8611	58.5447	0.270414	14.5071	1.65992	0.00511132	8.04001	0.35366	2.57101	5.56224	6.44305	0.20035	1.84246
2000	1081	54.5561	58.5738	0.271771	14.4758	1.66482	0.00513989	8.05599	0.355637	2.5469	5.5356	6.46038	0.201342	1.85276
2000	1080	54.2545	58.6028	0.273128	14.4445	1.66971	0.00516847	8.0719	0.357614	2.52299	5.50912	6.47761	0.202332	1.86306
2000	1079	53.9562	58.6317	0.274484	14.4132	1.67461	0.00519704	8.08774	0.359591	2.49926	5.4828	6.49474	0.203322	1.87336
2000	1078	53.6611	58.6605	0.27584	14.3818	1.67951	0.00522562	8.10352	0.361568	2.47573	5.45663	6.51178	0.20431	1.88367
2000	1077	53.3692	58.6891	0.277196	14.3503	1.68442	0.00525421	8.11922	0.363546	2.45238	5.43062	6.52872	0.205297	1.89397
2000	1076	53.0804	58.7176	0.278552	14.3188	1.68932	0.0052828	8.13486	0.365524	2.42922	5.40476	6.54557	0.206282	1.90427
2000	1075	52.7946	58.7459	0.279907	14.2872	1.69422	0.00531139	8.15044	0.367503	2.40625	5.37904	6.56232	0.207267	1.91458
2000	1074	52.5119	58.7742	0.281262	14.2556	1.69913	0.00533999	8.16595	0.369481	2.38345	5.35348	6.57898	0.20825	1.92489
2000	1073	52.2321	58.8023	0.282617	14.2239	1.70403	0.00536859	8.18139	0.371461	2.36084	5.32807	6.59555	0.209232	1.9352
2000	1072	51.9552	58.8303	0.283972	14.1922	1.70894	0.0053972	8.19677	0.37344	2.33841	5.3028	6.61203	0.210212	1.94551
2000	1071	51.6812	58.8582	0.285326	14.1604	1.71385	0.00542582	8.21209	0.37542	2.31615	5.27768	6.62841	0.211192	1.95583
2000	1070	51.41	58.886	0.286681	14.1286	1.71876	0.00545444	8.22734	0.3774	2.29407	5.25271	6.6447	0.21217	1.96615
2000	1069	51.1416	58.9136	0.288035	14.0967	1.72367	0.00548307	8.24252	0.379381	2.27216	5.22788	6.6609	0.213147	1.97647
2000	1068	50.8759	58.9411	0.28939	14.0648	1.72859	0.0055117	8.25764	0.381363	2.25042	5.20319	6.67702	0.214122	1.98679
2000	1067	50.6128	58.9685	0.290744	14.0329	1.73351	0.00554035	8.2727	0.383345	2.22886	5.17865	6.69304	0.215097	1.99711
2000	1066	50.3524	58.9958	0.292098	14.0009	1.73842	0.005569	8.2877	0.385327	2.20746	5.15425	6.70898	0.21607	2.00744
2000	1065	50.0946	59.023	0.293453	13.9688	1.74335	0.00559766	8.30263	0.38731	2.18623	5.12998	6.72483	0.217042	2.01777
2000	1064	49.8393	59.05	0.294807	13.9367	1.74827	0.00562633	8.3175	0.389294	2.16517	5.10586	6.74059	0.218013	2.02811
2000	1063	49.5866	59.077	0.296162	13.9046	1.75319	0.00565501	8.3323	0.391278	2.14427	5.08187	6.75626	0.218983	2.03845
2000	1062	49.3363	59.1038	0.297516	13.8724	1.75812	0.0056837	8.34705	0.393263	2.12353	5.05802	6.77185	0.219951	2.04879
2000	1061	49.0884	59.1305	0.298871	13.8402	1.76305	0.0057124	8.36173	0.395249	2.10296	5.0343	6.78736	0.220919	2.05913
2000	1060	48.843	59.1571	0.300226	13.8079	1.76799	0.00574111	8.37635	0.397235	2.08255	5.01072	6.80278	0.221885	2.06948
2000	1059	48.5999	59.1836	0.301581	13.7756	1.77292	0.00576983	8.39091	0.399223	2.06229	4.98728	6.81812	0.22285	2.07983
2000	1058	48.3591	59.21	0.302936	13.7433	1.77786	0.00579856	8.40541	0.40121	2.04219	4.96396	6.83337	0.223814	2.09019
2000	1057	48.1205	59.2362	0.304291	13.7109	1.7828	0.0058273	8.41984	0.403199	2.02225	4.94078	6.84855	0.224777	2.10055
2000	1056	47.8843	59.2624	0.305647	13.6785	1.78774	0.00585605	8.43421	0.405189	2.00246	4.91773	6.86364	0.225739	2.11091
2000	1055	47.6502	59.2884	0.307002	13.646	1.79269	0.00588482	8.44853	0.407179	1.98282	4.89481	6.87865	0.226699	2.12128
2000	1054	47.4183	59.3144	0.308358	13.6135	1.79764	0.00591359	8.46278	0.40917	1.96334	4.87202	6.89358	0.227659	2.13166
2000	1053	47.1886	59.3402	0.309715	13.581	1.80259	0.00594238	8.47697	0.411162	1.944	4.84935	6.90843	0.228617	2.14203
2000	1052	46.961	59.3659	0.311071	13.5484	1.80754	0.00597119	8.4911	0.413155	1.92482	4.82681	6.9232	0.229575	2.15242
2000	1051	46.7354	59.3915	0.312428	13.5158	1.8125	0.006	8.50516	0.415149	1.90578	4.8044	6.9379	0.230531	2.1628
2000	1050	46.5119	59.417	0.313785	13.4832	1.81746	0.00602883	8.51917	0.417144	1.88689	4.78211	6.95251	0.231486	2.1732
2000	1049	46.2905	59.4424	0.315143	13.4505	1.82242	0.00605768	8.53311	0.419139	1.86814	4.75995	6.96705	0.23244	2.18359
2000	1048	46.071	59.4677	0.316501	13.4178	1.82739	0.00608653	8.547	0.421136	1.84953	4.73791	6.98151	0.233393	2.194
2000	1047	45.8535	59.4929	0.317859	13.3851	1.83236	0.00611541	8.56082	0.423134	1.83107	4.71599	6.9959	0.234345	2.2044
2000	1046	45.6379	59.518	0.319218	13.3523	1.83733	0.0061443	8.57459	0.425133	1.81275	4.69419	7.01021	0.235296	2.21482
2000	1045	45.4242	59.543	0.320577	13.3195	1.84231	0.0061732	8.58829	0.427133	1.79457	4.67251	7.02445	0.236246	2.22524
2000	1044	45.2124	59.5679	0.321936	13.2867	1.84729	0.00620212	8.60193	0.429134	1.77653	4.65095	7.03861	0.237195	2.23566
2000	1043	45.0024	59.5927	0.323296	13.2538	1.85227	0.00623105	8.61551	0.431136	1.75862	4.62951	7.0527	0.238142	2.24609
2000	1042	44.7943	59.6174	0.324657	13.2209	1.85726	0.00626001	8.62903	0.433139	1.74085	4.60819	7.06671	0.239089	2.25653
2000	1041	44.588	59.642	0.326017	13.188	1.86225	0.00628897	8.64249	0.435143	1.72321	4.58699	7.08065	0.240035	2.26697
2000	1040	44.3834	59.6665	0.327379	13.155	1.86724	0.00631796	8.65588	0.437149	1.70571	4.5659	7.09452	0.24098	2.27742
2000	1039	44.1806	59.6909	0.328741	13.1221	1.87224	0.00634696	8.66922	0.439156	1.68834	4.54492	7.10832	0.241923	2.28787
2000	1038	43.9795	59.7152	0.330103	13.0891	1.87724	0.00637598	8.68249	0.441164	1.67111	4.52406	7.12205	0.242866	2.29833
2000	1037	43.7801	59.7394	0.331466	13.056	1.88224	0.00640502	8.6957	0.443173	1.654	4.50331	7.13571	0.243808	2.3088
2000	1036	43.5824	59.7635	0.33283	13.023	1.88725	0.00643408	8.70885	0.445183	1.63702	4.48268	7.1493	0.244748	2.31928
2000	1035	43.3863	59.7875	0.334194	12.9899	1.89226	0.00646316	8.72194	0.447195	1.62017	4.46216	7.16282	0.245688	2.32976
2000	1034	43.1919	59.8114	0.335559	12.9568	1.89727	0.00649225	8.73497	0.449208	1.60345	4.44174	7.17627	0.246627	2.34024
2000	1033	42.9982	59.8361	0.33685	12.9237	1.90217	0.00633711	8.74723	0.451232	1.5868	4.42142	7.18979	0.247569	2.35079
2000	1032	42.8055	59.8614	0.338087	12.8906	1.90699	0.00607721	8.75897	0.453263	1.57025	4.40119	7.20331	0.248514	2.36137
2000	1031	42.6143	59.8865	0.339315	12.8575	1.91181	0.00581833	8.77059	0.455296	1.55382	4.38107	7.21678	0.249458	2.37196
2000	1030	42.4247	59.9117	0.340536	12.8244	1.91662	0.00556054	8.78211	0.457332	1.53752	4.36105	7.23019	0.250402	2.38256
2000	1029	42.2366	59.9368	0.341749	12.7913	1.92143	0.00530402	8.79353	0.459369	1.52134	4.34114	7.24354	0.251345	2.39318
2000	1028	42.0499	59.9618	0.342954	12.7581	1.92623	0.00504896	8.80484	0.461408	1.50529	4.32133	7.25682	0.252287	2.4038
2000	1027	41.8647	59.9869	0.34415	12.725	1.93103	0.00479557	8.81604	0.46345	1.48935	4.30163	7.27005	0.253228	2.41444
2000	1026	41.6809	60.0119	0.345337	12.6918	1.93582	0.00454406	8.82713	0.465493	1.47354	4.28203	7.28323	0.254169	2.42508
2000	1025	41.4985	60.0368	0.346513	12.6586	1.94061	0.00429471	8.8381	0.467539	1.45784	4.26253	7.29634	0.25511	2.43574
2000	1024	41.3175	60.0618	0.347679	12.6253	1.9454	0.00404777	8.84896	0.469587	1.44226	4.24313	7.3094	0.256049	2.44641
2000	1023	41.1379	60.0867	0.348833	12.5921	1.95017	0.00380354	8.85971	0.471637	1.4268	4.22384	7.32241	0.256988	2.45709
2000	1022	40.9596	60.1116	0.349975	12.5588	1.95494	0.00356234	8.87033	0.47369	1.41146	4.20464	7.33536	0.257927	2.46779
2000	1021	40.7826	60.1364	0.351105	12.5255	1.9597	0.00332452	8.88083	0.475746	1.39623	4.18555	7.34825	0.258865	2.4785
2000	1020	40.607	60.1613	0.35222	12.4922	1.96446	0.00309045	8.8912	0.477804	1.38111	4.16655	7.3611	0.259803	2.48922
2000	1019	40.4326	60.1861	0.353321	12.4588	1.96921	0.00286052	8.90144	0.479864	1.36612	4.14765	7.37389	0.26074	2.49995
2000	1018	40.2595	60.211	0.354407	12.4255	1.97394	0.00263517	8.91155	0.481928	1.35123	4.12884	7.38664	0.261677	2.5107
2000	1017	40.0876	60.2358	0.355476	12.3921	1.97867	0.00241485	8.92153	0.483994	1.33646	4.11014	7.39933	0.262613	2.52147
2000	1016	39.917	60.2607	0.356527	12.3587	1.98339	0.00220006	8.93137	0.486063	1.3218	4.09152	7.41197	0.263549	2.53225
2000	1015	39.7475	60.2855	0.357559	12.3253	1.9881	0.00199129	8.94106	0.488135	1.30725	4.073	7.42457	0.264485	2.54304
2000	1014	39.5793	60.3104	0.358572	12.2918	1.9928	0.00178911	8.9506	0.49021	1.29281	4.05458	7.43712	0.26542	2.55385
2000	1013	39.4122	60.3353	0.359564	12.2584	1.99748	0.00159409	8.96	0.492288	1.27848	4.03625	7.44963	0.266355	2.56468
2000	1012	39.2463	60.3602	0.360533	12.2249	2.00215	0.00140683	8.96924	0.494369	1.26426	4.01801	7.46209	0.26729	2.57552
2000	1011	39.0815	60.3852	0.361478	12.1914	2.00681	0.00122798	8.97831	0.496454	1.25015	3.99986	7.47451	0.268225	2.58638
2000	1010	38.9178	60.4102	0.362397	12.1579	2.01146	0.0010582	8.98722	0.498542	1.23615	3.9818	7.48688	0.26916	2.59726
2000	1009	38.7552	60.4352	0.363288	12.1244	2.01608	0.000898194	8.99596	0.500634	1.22225	3.96383	7.49921	0.270094	2.60816
2000	1008	38.5936	60.4603	0.36415	12.0908	2.02069	0.000748682	9.00452	0.502729	1.20847	3.94596	7.51151	0.271028	2.61907
2000	1007	38.4332	60.4855	0.364979	12.0572	2.02528	0.000610418	9.01288	0.504829	1.19478	3.92817	7.52376	0.271963	2.63001
2000	1006	38.2737	60.5107	0.365773	12.0237	2.02985	0.000484178	9.02105	0.506932	1.18121	3.91046	7.53598	0.272897	2.64097
2000	1005	38.1152	60.5361	0.366528	11.9901	2.0344	0.000370761	9.02899	0.509039	1.16774	3.89285	7.54817	0.273832	2.65195
2000	1004	37.9577	60.5615	0.367239	11.9564	2.03892	0.000270982	9.0367	0.511152	1.15438	3.87532	7.56033	0.274767	2.66295
2000	1003	37.8012	60.5872	0.367896	11.9228	2.0434	0.000185666	9.04414	0.513269	1.14112	3.85787	7.57246	0.275703	2.67398
2000	1002	37.6454	60.613	0.368488	11.8891	2.04785	0.00011564	9.05125	0.515392	1.12797	3.8405	7.58458	0.27664	2.68504
2000	1001	37.4904	60.6393	0.368988	11.8555	2.05222	6.17058e-05	9.05791	0.517523	1.11492	3.82322	7.5967	0.277578	2.69615
2000	1000	37.3358	60.6662	0.369329	11.8218	2.05648	2.4593e-05	9.06382	0.519667	1.10199	3.806	7.60887	0.278521	2.70731
2000	999	37.1884	60.686	0.370971	11.7881	2.06181	0	9.07571	0.521727	1.08909	3.78904	7.62009	0.279421	2.71804
2000	998	37.0189	60.7326	0.367599	11.7543	2.06309	0	9.0646	0.524115	1.07653	3.77156	7.63464	0.280479	2.73049
2000	997	36.8348	60.7978	0.360787	11.7206	2.06149	0	9.03735	0.526735	1.06427	3.75377	7.65148	0.281649	2.74413
2000	996	36.6525	60.8627	0.354067	11.6868	2.05989	0	9.01012	0.529354	1.05214	3.7361	7.66822	0.282816	2.75778
2000	995	36.472	60.9275	0.347438	11.6529	2.05827	0	8.9829	0.531974	1.04013	3.71855	7.68488	0.283981	2.77143
2000	994	36.2933	60.992	0.3409	11.6191	2.05665	0	8.9557	0.534594	1.02825	3.70111	7.70143	0.285144	2.78508
2000	993	36.1162	61.0564	0.334451	11.5852	2.05501	0	8.92852	0.537214	1.0165	3.68379	7.7179	0.286305	2.79873
2000	992	35.9409	61.1205	0.32809	11.5513	2.05337	0	8.90135	0.539835	1.00486	3.66658	7.73428	0.287464	2.81238
2000	991	35.7672	61.1845	0.321817	11.5173	2.05171	0	8.87419	0.542457	0.993348	3.64948	7.75056	0.28862	2.82604
2000	990	35.5952	61.2482	0.315629	11.4833	2.05004	0	8.84704	0.545078	0.981953	3.63249	7.76676	0.289775	2.8397
2000	989	35.4247	61.3117	0.309527	11.4493	2.04836	0	8.8199	0.547701	0.970676	3.61562	7.78287	0.290927	2.85336
2000	988	35.2559	61.3751	0.303508	11.4153	2.04666	0	8.79276	0.550324	0.959515	3.59885	7.79889	0.292078	2.86703
2000	987	35.0886	61.4382	0.297573	11.3813	2.04495	0	8.76563	0.552947	0.94847	3.58219	7.81483	0.293226	2.88069
2000	986	34.9229	61.5012	0.29172	11.3472	2.04323	0	8.73849	0.555571	0.937538	3.56563	7.83068	0.294372	2.89436
2000	985	34.7587	61.564	0.285949	11.3131	2.04149	0	8.71136	0.558196	0.926719	3.54918	7.84645	0.295516	2.90804
2000	984	34.596	61.6267	0.280257	11.2789	2.03974	0	8.68423	0.560822	0.916011	3.53284	7.86213	0.296659	2.92172
2000	983	34.4347	61.6891	0.274646	11.2448	2.03797	0	8.65709	0.563448	0.905414	3.51659	7.87773	0.297799	2.9354
2000	982	34.2749	61.7514	0.269113	11.2106	2.03619	0	8.62995	0.566075	0.894925	3.50045	7.89325	0.298937	2.94908
2000	981	34.1165	61.8135	0.263658	11.1764	2.03439	0	8.6028	0.568703	0.884543	3.48441	7.90869	0.300074	2.96277
2000	980	33.9596	61.8755	0.258279	11.1422	2.03257	0	8.57564	0.571331	0.874268	3.46847	7.92406	0.301208	2.97647
2000	979	33.804	61.9373	0.252977	11.108	2.03074	0	8.54848	0.573961	0.864098	3.45263	7.93934	0.30234	2.99017
2000	978	33.6498	61.999	0.24775	11.0737	2.02889	0	8.52129	0.576591	0.854033	3.43689	7.95454	0.303471	3.00387
2000	977	33.4969	62.0605	0.242598	11.0394	2.02703	0	8.4941	0.579222	0.84407	3.42124	7.96967	0.3046	3.01758
2000	976	33.3454	62.1218	0.23752	11.0051	2.02514	0	8.46688	0.581854	0.834209	3.40569	7.98472	0.305726	3.03129
2000	975	33.1952	62.183	0.232514	10.9708	2.02324	0	8.43965	0.584487	0.82445	3.39023	7.9997	0.306851	3.04501
2000	974	33.0462	62.2441	0.227581	10.9365	2.02132	0	8.4124	0.587122	0.814789	3.37487	8.0146	0.307974	3.05873
2000	973	32.8986	62.305	0.222719	10.9022	2.01938	0	8.38513	0.589757	0.805228	3.3596	8.02942	0.309095	3.07246
2000	972	32.7522	62.3658	0.217928	10.8678	2.01742	0	8.35783	0.592393	0.795765	3.34442	8.04418	0.310214	3.08619
2000	971	32.607	62.4265	0.213207	10.8335	2.01543	0	8.33051	0.59503	0.786398	3.32933	8.05886	0.311331	3.09993
2000	970	32.4631	62.487	0.208556	10.7991	2.01343	0	8.30316	0.597669	0.777127	3.31433	8.07347	0.312447	3.11368
2000	969	32.3203	62.5474	0.203973	10.7647	2.01141	0	8.27578	0.600308	0.767951	3.29942	8.08801	0.31356	3.12743
2000	968	32.1788	62.6077	0.199457	10.7303	2.00936	0	8.24836	0.602949	0.758868	3.2846	8.10249	0.314672	3.14119
2000	967	32.0384	62.6679	0.19501	10.6959	2.00729	0	8.22092	0.605591	0.749879	3.26987	8.11689	0.315782	3.15495
2000	966	31.8992	62.728	0.190629	10.6615	2.0052	0	8.19344	0.608234	0.740982	3.25522	8.13122	0.31689	3.16872
2000	965	31.7611	62.7879	0.186313	10.6271	2.00308	0	8.16592	0.610878	0.732176	3.24066	8.14549	0.317997	3.1825
2000	964	31.6241	62.8477	0.182064	10.5927	2.00094	0	8.13837	0.613524	0.723461	3.22618	8.15969	0.319101	3.19628
2000	963	31.4883	62.9075	0.177878	10.5582	1.99878	0	8.11077	0.616171	0.714834	3.21179	8.17382	0.320204	3.21007
2000	962	31.3535	62.9671	0.173757	10.5238	1.99659	0	8.08313	0.618819	0.706297	3.19748	8.18789	0.321305	3.22387
2000	961	31.2198	63.0266	0.1697	10.4893	1.99438	0	8.05544	0.621469	0.697847	3.18325	8.20189	0.322405	3.23767
2000	960	31.0872	63.0861	0.165705	10.4549	1.99213	0	8.02771	0.62412	0.689485	3.1691	8.21583	0.323502	3.25148
2000	959	30.9557	63.1454	0.161773	10.4204	1.98987	0	7.99993	0.626773	0.681209	3.15503	8.22971	0.324598	3.2653
2000	958	30.8251	63.2047	0.157902	10.3859	1.98757	0	7.97209	0.629426	0.673018	3.14104	8.24352	0.325692	3.27913
2000	957	30.6957	63.2638	0.154093	10.3515	1.98525	0	7.94421	0.632082	0.664912	3.12713	8.25728	0.326784	3.29296
2000	956	30.5672	63.3229	0.150344	10.317	1.98289	0	7.91627	0.634738	0.65689	3.1133	8.27097	0.327875	3.3068
2000	955	30.4397	63.3819	0.146655	10.2825	1.98051	0	7.88827	0.637397	0.648952	3.09955	8.2846	0.328964	3.32065
2000	954	30.3132	63.4409	0.143026	10.248	1.9781	0	7.86021	0.640056	0.641096	3.08587	8.29817	0.330051	3.33451
2000	953	30.1877	63.4997	0.139456	10.2136	1.97566	0	7.83209	0.642718	0.633322	3.07226	8.31169	0.331137	3.34837
2000	952	30.0631	63.5585	0.135944	10.1791	1.97318	0	7.80391	0.645381	0.625629	3.05873	8.32514	0.332221	3.36224
2000	951	29.9395	63.6173	0.13249	10.1446	1.97068	0	7.77566	0.648045	0.618017	3.04528	8.33854	0.333303	3.37613
2000	950	29.8168	63.6759	0.129093	10.1101	1.96814	0	7.74734	0.650711	0.610484	3.0319	8.35188	0.334384	3.39002
2000	949	29.6951	63.7345	0.125753	10.0757	1.96556	0	7.71895	0.653379	0.603031	3.01858	8.36516	0.335462	3.40391
2000	948	29.5064	63.8385	0.125793	10.0428	1.95545	0	7.64956	0.647666	0.576693	3.01014	8.39052	0.337211	3.42568
2000	947	29.3771	63.908	0.123321	10.0061	1.95109	0	7.61192	0.647184	0.568352	3.00054	8.40438	0.338369	3.44076
2000	946	29.2489	63.9774	0.120891	9.96933	1.9467	0	7.57429	0.646691	0.560103	2.99101	8.4182	0.339525	3.45584
2000	945	29.1217	64.0467	0.118503	9.93259	1.94229	0	7.53666	0.646188	0.551946	2.98153	8.43196	0.34068	3.47094
2000	944	28.9955	64.1159	0.116156	9.89587	1.93784	0	7.49906	0.645674	0.54388	2.97211	8.44568	0.341834	3.48605
2000	943	28.8703	64.1849	0.113849	9.85916	1.93336	0	7.46146	0.64515	0.535904	2.96275	8.45935	0.342986	3.50116
2000	942	28.7461	64.2537	0.111583	9.82245	1.92885	0	7.42389	0.644617	0.528017	2.95345	8.47298	0.344136	3.51629
2000	941	28.6229	64.3225	0.109356	9.78576	1.92431	0	7.38633	0.644073	0.52022	2.94421	8.48655	0.345285	3.53142
2000	940	28.5007	64.3911	0.107167	9.74909	1.91974	0	7.34879	0.64352	0.51251	2.93502	8.50008	0.346433	3.54656
2000	939	28.3795	64.4595	0.105017	9.71242	1.91514	0	7.31128	0.642957	0.504889	2.92589	8.51356	0.347578	3.56171
2000	938	28.2592	64.5279	0.102905	9.67577	1.91051	0	7.27379	0.642385	0.497354	2.91682	8.527	0.348722	3.57687
2000	937	28.1399	64.5961	0.10083	9.63912	1.90585	0	7.23632	0.641803	0.489906	2.90781	8.54038	0.349865	3.59204
2000	936	28.0215	64.6641	0.0987921	9.60249	1.90117	0	7.19888	0.641213	0.482543	2.89885	8.55372	0.351006	3.60721
2000	935	27.9041	64.732	0.0967901	9.56587	1.89645	0	7.16146	0.640614	0.475266	2.88995	8.56702	0.352145	3.62239
2000	934	27.7876	64.7998	0.0948238	9.52927	1.89171	0	7.12408	0.640006	0.468073	2.88111	8.58026	0.353282	3.63758
2000	933	27.672	64.8674	0.0928926	9.49267	1.88693	0	7.08673	0.63939	0.460964	2.87232	8.59346	0.354418	3.65278
2000	932	27.5573	64.9349	0.0909961	9.45609	1.88213	0	7.04941	0.638765	0.453938	2.86358	8.60661	0.355552	3.66798
2000	931	27.4435	65.0023	0.0891338	9.41952	1.87731	0	7.01213	0.638132	0.446995	2.85491	8.61971	0.356684	3.68319
2000	930	27.3306	65.0695	0.0873051	9.38296	1.87245	0	6.97488	0.637491	0.440133	2.84629	8.63277	0.357815	3.6984
2000	929	27.2186	65.1366	0.0855096	9.34642	1.86757	0	6.93767	0.636843	0.433353	2.83772	8.64577	0.358943	3.71362
2000	928	27.1075	65.2035	0.0837467	9.30989	1.86266	0	6.9005	0.636186	0.426654	2.82921	8.65873	0.36007	3.72884
2000	927	26.9972	65.2703	0.0820161	9.27337	1.85772	0	6.86338	0.635522	0.420035	2.82075	8.67164	0.361195	3.74407
2000	926	26.8878	65.3369	0.0803171	9.23686	1.85276	0	6.82629	0.634851	0.413495	2.81235	8.68451	0.362318	3.75931
2000	925	26.7792	65.4034	0.0786494	9.20037	1.84777	0	6.78925	0.634173	0.407034	2.804	8.69732	0.363439	3.77455
2000	924	26.6715	65.4698	0.0770125	9.1639	1.84276	0	6.75226	0.633487	0.400652	2.79571	8.71009	0.364558	3.78979
2000	923	26.5646	65.536	0.0754059	9.12743	1.83772	0	6.71531	0.632795	0.394346	2.78747	8.72281	0.365676	3.80504
2000	922	26.4586	65.6021	0.0738292	9.09098	1.83265	0	6.67842	0.632096	0.388118	2.77928	8.73548	0.366791	3.82029
2000	921	26.3533	65.668	0.0722819	9.05455	1.82756	0	6.64157	0.63139	0.381966	2.77115	8.74811	0.367904	3.83555
2000	920	26.2489	65.7337	0.0707635	9.01813	1.82245	0	6.60478	0.630678	0.37589	2.76307	8.76068	0.369015	3.85081
2000	919	26.1453	65.7994	0.0692737	8.98172	1.81731	0	6.56804	0.629959	0.369889	2.75504	8.77321	0.370124	3.86607
2000	918	26.0425	65.8648	0.067812	8.94533	1.81215	0	6.53136	0.629235	0.363962	2.74707	8.78569	0.371232	3.88134
2000	917	25.9404	65.9301	0.0663779	8.90896	1.80696	0	6.49474	0.628504	0.358109	2.73915	8.79812	0.372337	3.8966
2000	916	25.8392	65.9953	0.064971	8.8726	1.80175	0	6.45817	0.627768	0.352329	2.73128	8.81051	0.373439	3.91187
2000	915	25.7387	66.0603	0.063591	8.83626	1.79652	0	6.42167	0.627026	0.346621	2.72346	8.82284	0.37454	3.92714
2000	914	25.639	66.1252	0.0622373	8.79993	1.79126	0	6.38523	0.626278	0.340986	2.7157	8.83513	0.375639	3.94242
2000	913	25.54	66.1899	0.0609097	8.76362	1.78599	0	6.34885	0.625526	0.335422	2.70799	8.84736	0.376735	3.95769
2000	912	25.4418	66.2545	0.0596076	8.72733	1.78069	0	6.31254	0.624767	0.329928	2.70033	8.85955	0.377829	3.97297
2000	911	25.3444	66.3189	0.0583306	8.69105	1.77537	0	6.2763	0.624004	0.324505	2.69272	8.87169	0.378921	3.98824
2000	910	25.2477	66.3831	0.0570785	8.65479	1.77003	0	6.24012	0.623235	0.319151	2.68516	8.88379	0.380011	4.00352
2000	909	25.1517	66.4472	0.0558507	8.61855	1.76466	0	6.20402	0.622462	0.313865	2.67766	8.89583	0.381098	4.01879
2000	908	25.0565	66.5112	0.0546469	8.58233	1.75928	0	6.16798	0.621684	0.308648	2.6702	8.90783	0.382183	4.03407
2000	907	24.962	66.5749	0.0534667	8.54612	1.75388	0	6.13202	0.620902	0.303499	2.6628	8.91977	0.383266	4.04934
2000	906	24.8682	66.6386	0.0523097	8.50994	1.74846	0	6.09614	0.620115	0.298416	2.65544	8.93167	0.384346	4.06462
2000	905	24.7751	66.702	0.0511755	8.47377	1.74301	0	6.06033	0.619323	0.2934	2.64814	8.94352	0.385424	4.07989
2000	904	24.6827	66.7653	0.0500639	8.43763	1.73755	0	6.0246	0.618528	0.288449	2.64088	8.95532	0.386499	4.09516
2000	903	24.591	66.8285	0.0489743	8.4015	1.73207	0	5.98895	0.617728	0.283564	2.63368	8.96707	0.387572	4.11043
2000	902	24.5	66.8915	0.0479065	8.36539	1.72657	0	5.95337	0.616924	0.278743	2.62653	8.97877	0.388643	4.1257
2000	901	24.4097	66.9543	0.0468601	8.32931	1.72106	0	5.91789	0.616116	0.273986	2.61942	8.99042	0.389711	4.14096
2000	900	24.3201	67.0169	0.0458348	8.29325	1.71552	0	5.88248	0.615305	0.269292	2.61237	9.00202	0.390776	4.15622
Title:	R-magma	-	mresidual	from	MZ-magma	at	T	=	1145	C
liquid_0	thermodynamic	data	and	composition:
Pressure	Temperature	mass	S	H	V	Cp	viscosity	SiO2	TiO2	Al2O3	Fe2O3	Cr2O3	FeO	MnO	MgO	CaO	Na2O	K2O	H2O	Mg#
2000	1400	99.9932	296.829	-1.2154e+06	40.2539	149.391	1.994	55.7671	0.157692	16.7856	1.1651	0.00280432	6.51636	0.194035	5.38987	8.22222	4.67249	0.11589	1.01086	59.6
2000	1400	99.9932	296.829	-1.2154e+06	40.2539	149.391	1.994	55.7671	0.157692	16.7856	1.1651	0.00280432	6.51636	0.194035	5.38987	8.22222	4.67249	0.11589	1.01086	59.6
2000	1399	99.9932	296.74	-1.21555e+06	40.2505	149.391	1.997	55.7671	0.157692	16.7856	1.16524	0.00280432	6.51624	0.194035	5.38987	8.22222	4.67249	0.11589	1.01086	59.6
2000	1398	99.9932	296.651	-1.2157e+06	40.2471	149.391	2.001	55.7671	0.157692	16.7856	1.16537	0.00280432	6.51612	0.194035	5.38987	8.22222	4.67248	0.11589	1.01086	59.6
2000	1397	99.9932	296.561	-1.21585e+06	40.2437	149.39	2.005	55.7671	0.157692	16.7856	1.16551	0.00280432	6.51599	0.194035	5.38987	8.22221	4.67248	0.11589	1.01086	59.6
2000	1396	99.9932	296.472	-1.216e+06	40.2403	149.39	2.009	55.767	0.157692	16.7856	1.16565	0.00280432	6.51587	0.194035	5.38987	8.22221	4.67248	0.11589	1.01086	59.6
2000	1395	99.9932	296.382	-1.21615e+06	40.2369	149.389	2.013	55.767	0.157692	16.7856	1.16579	0.00280432	6.51574	0.194035	5.38987	8.22221	4.67248	0.11589	1.01086	59.6
2000	1394	99.9933	296.293	-1.2163e+06	40.2335	149.389	2.016	55.767	0.157692	16.7856	1.16593	0.00280432	6.51561	0.194035	5.38987	8.22221	4.67248	0.115889	1.01086	59.6
2000	1393	99.9933	296.203	-1.21645e+06	40.2301	149.389	2.02	55.767	0.157691	16.7856	1.16607	0.00280432	6.51548	0.194035	5.38987	8.22221	4.67248	0.115889	1.01086	59.6
2000	1392	99.9933	296.114	-1.2166e+06	40.2267	149.388	2.024	55.767	0.157691	16.7856	1.16622	0.00280432	6.51535	0.194035	5.38987	8.22221	4.67248	0.115889	1.01086	59.6
2000	1391	99.9933	296.024	-1.21675e+06	40.2232	149.388	2.028	55.767	0.157691	16.7856	1.16636	0.00280431	6.51522	0.194035	5.38987	8.22221	4.67248	0.115889	1.01086	59.6
2000	1390	99.9933	295.934	-1.21689e+06	40.2198	149.387	2.032	55.767	0.157691	16.7856	1.16651	0.00280431	6.51508	0.194035	5.38986	8.22221	4.67248	0.115889	1.01086	59.6
2000	1389	99.9933	295.844	-1.21704e+06	40.2164	149.387	2.036	55.767	0.157691	16.7856	1.16666	0.00280431	6.51495	0.194035	5.38986	8.22221	4.67248	0.115889	1.01086	59.6
2000	1388	99.9933	295.754	-1.21719e+06	40.213	149.387	2.04	55.767	0.157691	16.7856	1.16681	0.00280431	6.51481	0.194035	5.38986	8.2222	4.67248	0.115889	1.01086	59.6
2000	1387	99.9934	295.665	-1.21734e+06	40.2096	149.386	2.043	55.767	0.157691	16.7856	1.16696	0.00280431	6.51467	0.194034	5.38986	8.2222	4.67248	0.115889	1.01086	59.6
2000	1386	99.9934	295.575	-1.21749e+06	40.2062	149.386	2.047	55.767	0.157691	16.7856	1.16711	0.00280431	6.51454	0.194034	5.38986	8.2222	4.67248	0.115889	1.01086	59.6
2000	1385	99.9934	295.485	-1.21764e+06	40.2028	149.385	2.051	55.767	0.157691	16.7856	1.16727	0.00280431	6.5144	0.194034	5.38986	8.2222	4.67248	0.115889	1.01086	59.6
2000	1384	99.9934	295.394	-1.21779e+06	40.1994	149.385	2.055	55.7669	0.157691	16.7856	1.16742	0.00280431	6.51425	0.194034	5.38986	8.2222	4.67248	0.115889	1.01086	59.6
2000	1383	99.9934	295.304	-1.21794e+06	40.196	149.385	2.059	55.7669	0.157691	16.7856	1.16758	0.00280431	6.51411	0.194034	5.38986	8.2222	4.67247	0.115889	1.01086	59.6
2000	1382	99.9934	295.214	-1.21809e+06	40.1926	149.384	2.063	55.7669	0.157691	16.7856	1.16774	0.00280431	6.51397	0.194034	5.38986	8.2222	4.67247	0.115889	1.01086	59.6
2000	1381	99.9935	295.124	-1.21824e+06	40.1892	149.384	2.067	55.7669	0.157691	16.7856	1.1679	0.00280431	6.51382	0.194034	5.38986	8.2222	4.67247	0.115889	1.01086	59.6
2000	1380	99.9935	295.034	-1.21839e+06	40.1857	149.383	2.071	55.7669	0.157691	16.7855	1.16806	0.00280431	6.51368	0.194034	5.38986	8.22219	4.67247	0.115889	1.01086	59.6
2000	1379	99.9935	294.943	-1.21854e+06	40.1823	149.383	2.075	55.7669	0.157691	16.7855	1.16822	0.00280431	6.51353	0.194034	5.38986	8.22219	4.67247	0.115889	1.01086	59.6
2000	1378	99.9935	294.853	-1.21869e+06	40.1789	149.383	2.078	55.7669	0.157691	16.7855	1.16839	0.00280431	6.51338	0.194034	5.38985	8.22219	4.67247	0.115889	1.01086	59.6
2000	1377	99.9935	294.762	-1.21884e+06	40.1755	149.382	2.082	55.7669	0.157691	16.7855	1.16855	0.00280431	6.51323	0.194034	5.38985	8.22219	4.67247	0.115889	1.01086	59.6
2000	1376	99.9935	294.672	-1.21899e+06	40.1721	149.382	2.086	55.7669	0.157691	16.7855	1.16872	0.00280431	6.51308	0.194034	5.38985	8.22219	4.67247	0.115889	1.01086	59.6
2000	1375	99.9936	294.581	-1.21914e+06	40.1687	149.381	2.09	55.7669	0.157691	16.7855	1.16889	0.00280431	6.51292	0.194034	5.38985	8.22219	4.67247	0.115889	1.01086	59.6
2000	1374	99.9936	294.491	-1.21929e+06	40.1653	149.381	2.094	55.7669	0.157691	16.7855	1.16906	0.00280431	6.51277	0.194034	5.38985	8.22219	4.67247	0.115889	1.01086	59.6
2000	1373	99.9936	294.4	-1.21944e+06	40.1619	149.381	2.098	55.7668	0.157691	16.7855	1.16923	0.00280431	6.51261	0.194034	5.38985	8.22218	4.67247	0.115889	1.01086	59.6
2000	1372	99.9936	294.309	-1.21959e+06	40.1585	149.38	2.102	55.7668	0.157691	16.7855	1.1694	0.00280431	6.51246	0.194034	5.38985	8.22218	4.67247	0.115889	1.01086	59.6
2000	1371	99.9936	294.218	-1.21974e+06	40.1551	149.38	2.106	55.7668	0.157691	16.7855	1.16958	0.00280431	6.5123	0.194034	5.38985	8.22218	4.67246	0.115889	1.01086	59.6
2000	1370	99.9936	294.128	-1.21989e+06	40.1517	149.38	2.11	55.7668	0.157691	16.7855	1.16976	0.00280431	6.51214	0.194034	5.38985	8.22218	4.67246	0.115889	1.01086	59.6
2000	1369	99.9937	294.037	-1.22004e+06	40.1483	149.379	2.114	55.7668	0.157691	16.7855	1.16993	0.0028043	6.51198	0.194034	5.38985	8.22218	4.67246	0.115889	1.01086	59.6
2000	1368	99.9937	293.946	-1.22019e+06	40.1449	149.379	2.118	55.7668	0.157691	16.7855	1.17011	0.0028043	6.51181	0.194034	5.38985	8.22218	4.67246	0.115889	1.01086	59.6
2000	1367	99.9937	293.855	-1.22034e+06	40.1415	149.378	2.122	55.7668	0.157691	16.7855	1.17029	0.0028043	6.51165	0.194034	5.38984	8.22218	4.67246	0.115889	1.01086	59.6
2000	1366	99.9937	293.764	-1.22049e+06	40.1381	149.378	2.126	55.7668	0.157691	16.7855	1.17048	0.0028043	6.51148	0.194034	5.38984	8.22217	4.67246	0.115889	1.01086	59.6
2000	1365	99.9937	293.673	-1.22063e+06	40.1347	149.378	2.13	55.7668	0.157691	16.7855	1.17066	0.0028043	6.51132	0.194034	5.38984	8.22217	4.67246	0.115889	1.01086	59.6
2000	1364	99.9938	293.581	-1.22078e+06	40.1313	149.377	2.134	55.7668	0.157691	16.7855	1.17084	0.0028043	6.51115	0.194034	5.38984	8.22217	4.67246	0.115889	1.01086	59.6
2000	1363	99.9938	293.49	-1.22093e+06	40.1279	149.377	2.138	55.7667	0.157691	16.7855	1.17103	0.0028043	6.51098	0.194034	5.38984	8.22217	4.67246	0.115889	1.01086	59.6
2000	1362	99.9938	293.399	-1.22108e+06	40.1245	149.376	2.142	55.7667	0.157691	16.7855	1.17122	0.0028043	6.51081	0.194034	5.38984	8.22217	4.67246	0.115889	1.01086	59.6
2000	1361	99.9938	293.308	-1.22123e+06	40.1211	149.376	2.146	55.7667	0.157691	16.7855	1.17141	0.0028043	6.51064	0.194034	5.38984	8.22217	4.67246	0.115889	1.01086	59.6
2000	1360	99.9938	293.216	-1.22138e+06	40.1177	149.376	2.15	55.7667	0.157691	16.7855	1.1716	0.0028043	6.51046	0.194034	5.38984	8.22216	4.67246	0.115889	1.01086	59.6
2000	1359	99.9938	293.125	-1.22153e+06	40.1143	149.375	2.154	55.7667	0.157691	16.7855	1.17179	0.0028043	6.51029	0.194034	5.38984	8.22216	4.67245	0.115889	1.01086	59.6
2000	1358	99.9939	293.033	-1.22168e+06	40.1109	149.375	2.158	55.7667	0.157691	16.7855	1.17199	0.0028043	6.51011	0.194033	5.38983	8.22216	4.67245	0.115889	1.01086	59.6
2000	1357	99.9939	292.942	-1.22183e+06	40.1075	149.375	2.162	55.7667	0.157691	16.7855	1.17218	0.0028043	6.50993	0.194033	5.38983	8.22216	4.67245	0.115889	1.01086	59.6
2000	1356	99.9939	292.85	-1.22198e+06	40.1041	149.374	2.166	55.7667	0.15769	16.7855	1.17238	0.0028043	6.50976	0.194033	5.38983	8.22216	4.67245	0.115889	1.01086	59.6
2000	1355	99.9939	292.758	-1.22213e+06	40.1007	149.374	2.17	55.7667	0.15769	16.7855	1.17258	0.0028043	6.50958	0.194033	5.38983	8.22216	4.67245	0.115889	1.01086	59.6
2000	1354	99.9939	292.667	-1.22228e+06	40.0973	149.373	2.174	55.7666	0.15769	16.7855	1.17278	0.0028043	6.50939	0.194033	5.38983	8.22215	4.67245	0.115889	1.01086	59.6
2000	1353	99.994	292.575	-1.22243e+06	40.0939	149.373	2.178	55.7666	0.15769	16.7855	1.17298	0.0028043	6.50921	0.194033	5.38983	8.22215	4.67245	0.115889	1.01086	59.6
2000	1352	99.994	292.483	-1.22258e+06	40.0905	149.373	2.182	55.7666	0.15769	16.7855	1.17319	0.0028043	6.50902	0.194033	5.38983	8.22215	4.67245	0.115889	1.01086	59.6
2000	1351	99.994	292.391	-1.22273e+06	40.0871	149.372	2.186	55.7666	0.15769	16.7855	1.17339	0.00280429	6.50884	0.194033	5.38983	8.22215	4.67245	0.115889	1.01086	59.6
2000	1350	99.994	292.299	-1.22288e+06	40.0837	149.372	2.19	55.7666	0.15769	16.7855	1.1736	0.00280429	6.50865	0.194033	5.38983	8.22215	4.67245	0.115889	1.01086	59.6
2000	1349	99.994	292.207	-1.22303e+06	40.0803	149.372	2.194	55.7666	0.15769	16.7855	1.17381	0.00280429	6.50846	0.194033	5.38983	8.22215	4.67245	0.115889	1.01086	59.6
2000	1348	99.9941	292.115	-1.22318e+06	40.0769	149.371	2.198	55.7666	0.15769	16.7854	1.17402	0.00280429	6.50827	0.194033	5.38982	8.22214	4.67244	0.115889	1.01086	59.6
2000	1347	99.9941	292.023	-1.22333e+06	40.0735	149.371	2.202	55.7666	0.15769	16.7854	1.17423	0.00280429	6.50808	0.194033	5.38982	8.22214	4.67244	0.115889	1.01086	59.6
2000	1346	99.9941	291.931	-1.22348e+06	40.0701	149.371	2.206	55.7666	0.15769	16.7854	1.17444	0.00280429	6.50789	0.194033	5.38982	8.22214	4.67244	0.115889	1.01086	59.6
2000	1345	99.9941	291.839	-1.22363e+06	40.0667	149.37	2.21	55.7665	0.15769	16.7854	1.17466	0.00280429	6.50769	0.194033	5.38982	8.22214	4.67244	0.115888	1.01086	59.6
2000	1344	99.9942	291.746	-1.22378e+06	40.0633	149.37	2.214	55.7665	0.15769	16.7854	1.17487	0.00280429	6.50749	0.194033	5.38982	8.22214	4.67244	0.115888	1.01085	59.6
2000	1343	99.9942	291.654	-1.22393e+06	40.0599	149.369	2.218	55.7665	0.15769	16.7854	1.17509	0.00280429	6.5073	0.194033	5.38982	8.22214	4.67244	0.115888	1.01085	59.6
2000	1342	99.9942	291.562	-1.22408e+06	40.0565	149.369	2.222	55.7665	0.15769	16.7854	1.17531	0.00280429	6.5071	0.194033	5.38982	8.22213	4.67244	0.115888	1.01085	59.6
2000	1341	99.9942	291.469	-1.22423e+06	40.0531	149.369	2.226	55.7665	0.15769	16.7854	1.17553	0.00280429	6.5069	0.194033	5.38982	8.22213	4.67244	0.115888	1.01085	59.6
2000	1340	99.9942	291.377	-1.22438e+06	40.0497	149.368	2.231	55.7665	0.15769	16.7854	1.17575	0.00280429	6.5067	0.194033	5.38981	8.22213	4.67244	0.115888	1.01085	59.6
2000	1339	99.9943	291.284	-1.22453e+06	40.0463	149.368	2.235	55.7665	0.15769	16.7854	1.17598	0.00280429	6.50649	0.194033	5.38981	8.22213	4.67243	0.115888	1.01085	59.6
2000	1338	99.9943	291.191	-1.22468e+06	40.0429	149.368	2.239	55.7665	0.15769	16.7854	1.1762	0.00280429	6.50629	0.194033	5.38981	8.22213	4.67243	0.115888	1.01085	59.6
2000	1337	99.9943	291.099	-1.22483e+06	40.0395	149.367	2.243	55.7664	0.15769	16.7854	1.17643	0.00280429	6.50608	0.194033	5.38981	8.22212	4.67243	0.115888	1.01085	59.6
2000	1336	99.9943	291.006	-1.22498e+06	40.0361	149.367	2.247	55.7664	0.15769	16.7854	1.17666	0.00280429	6.50587	0.194033	5.38981	8.22212	4.67243	0.115888	1.01085	59.6
2000	1335	99.9944	290.913	-1.22512e+06	40.0327	149.367	2.251	55.7664	0.15769	16.7854	1.17689	0.00280429	6.50566	0.194033	5.38981	8.22212	4.67243	0.115888	1.01085	59.6
2000	1334	99.9944	290.82	-1.22527e+06	40.0293	149.366	2.255	55.7664	0.15769	16.7854	1.17712	0.00280428	6.50545	0.194032	5.38981	8.22212	4.67243	0.115888	1.01085	59.6
2000	1333	99.9944	290.727	-1.22542e+06	40.026	149.366	2.259	55.7664	0.15769	16.7854	1.17736	0.00280428	6.50524	0.194032	5.38981	8.22212	4.67243	0.115888	1.01085	59.6
2000	1332	99.9944	290.634	-1.22557e+06	40.0226	149.366	2.263	55.7664	0.15769	16.7854	1.17759	0.00280428	6.50503	0.194032	5.3898	8.22212	4.67243	0.115888	1.01085	59.6
2000	1331	99.9945	290.541	-1.22572e+06	40.0192	149.365	2.268	55.7664	0.15769	16.7854	1.17783	0.00280428	6.50481	0.194032	5.3898	8.22211	4.67243	0.115888	1.01085	59.6
2000	1330	99.9945	290.448	-1.22587e+06	40.0158	149.365	2.272	55.7664	0.15769	16.7854	1.17807	0.00280428	6.50459	0.194032	5.3898	8.22211	4.67243	0.115888	1.01085	59.6
2000	1329	99.9945	290.355	-1.22602e+06	40.0124	149.364	2.276	55.7663	0.15769	16.7854	1.17831	0.00280428	6.50437	0.194032	5.3898	8.22211	4.67242	0.115888	1.01085	59.6
2000	1328	99.9945	290.262	-1.22617e+06	40.009	149.364	2.28	55.7663	0.15769	16.7854	1.17855	0.00280428	6.50415	0.194032	5.3898	8.22211	4.67242	0.115888	1.01085	59.6
2000	1327	99.9945	290.169	-1.22632e+06	40.0056	149.364	2.284	55.7663	0.157689	16.7854	1.1788	0.00280428	6.50393	0.194032	5.3898	8.22211	4.67242	0.115888	1.01085	59.6
2000	1326	99.9946	290.075	-1.22647e+06	40.0022	149.363	2.288	55.7663	0.157689	16.7854	1.17904	0.00280428	6.50371	0.194032	5.3898	8.2221	4.67242	0.115888	1.01085	59.6
2000	1325	99.9946	289.982	-1.22662e+06	39.9988	149.363	2.293	55.7663	0.157689	16.7854	1.17929	0.00280428	6.50348	0.194032	5.3898	8.2221	4.67242	0.115888	1.01085	59.6
2000	1324	99.9946	289.889	-1.22677e+06	39.9954	149.363	2.297	55.7663	0.157689	16.7854	1.17954	0.00280428	6.50326	0.194032	5.38979	8.2221	4.67242	0.115888	1.01085	59.6
2000	1323	99.9946	289.795	-1.22692e+06	39.992	149.362	2.301	55.7663	0.157689	16.7854	1.17979	0.00280428	6.50303	0.194032	5.38979	8.2221	4.67242	0.115888	1.01085	59.6
2000	1322	99.9947	289.702	-1.22707e+06	39.9887	149.362	2.305	55.7662	0.157689	16.7853	1.18004	0.00280428	6.5028	0.194032	5.38979	8.2221	4.67242	0.115888	1.01085	59.6
2000	1321	99.9947	289.608	-1.22722e+06	39.9853	149.362	2.309	55.7662	0.157689	16.7853	1.1803	0.00280428	6.50257	0.194032	5.38979	8.22209	4.67241	0.115888	1.01085	59.6
2000	1320	99.9947	289.514	-1.22737e+06	39.9819	149.361	2.314	55.7662	0.157689	16.7853	1.18055	0.00280427	6.50234	0.194032	5.38979	8.22209	4.67241	0.115888	1.01085	59.6
2000	1319	99.9947	289.421	-1.22752e+06	39.9785	149.361	2.318	55.7662	0.157689	16.7853	1.18081	0.00280427	6.5021	0.194032	5.38979	8.22209	4.67241	0.115888	1.01085	59.6
2000	1318	99.9948	289.327	-1.22767e+06	39.9751	149.361	2.322	55.7662	0.157689	16.7853	1.18107	0.00280427	6.50187	0.194032	5.38979	8.22209	4.67241	0.115888	1.01085	59.6
2000	1317	99.9948	289.233	-1.22782e+06	39.9717	149.36	2.326	55.7662	0.157689	16.7853	1.18133	0.00280427	6.50163	0.194032	5.38978	8.22208	4.67241	0.115888	1.01085	59.6
2000	1316	99.9948	289.139	-1.22797e+06	39.9683	149.36	2.33	55.7662	0.157689	16.7853	1.1816	0.00280427	6.50139	0.194032	5.38978	8.22208	4.67241	0.115888	1.01085	59.6
2000	1315	99.9949	289.045	-1.22812e+06	39.9649	149.36	2.335	55.7661	0.157689	16.7853	1.18186	0.00280427	6.50115	0.194032	5.38978	8.22208	4.67241	0.115888	1.01085	59.6
2000	1314	99.9949	288.951	-1.22827e+06	39.9616	149.359	2.339	55.7661	0.157689	16.7853	1.18213	0.00280427	6.50091	0.194032	5.38978	8.22208	4.67241	0.115888	1.01085	59.6
2000	1313	99.9949	288.857	-1.22842e+06	39.9582	149.359	2.343	55.7661	0.157689	16.7853	1.18239	0.00280427	6.50067	0.194031	5.38978	8.22208	4.6724	0.115888	1.01085	59.6
2000	1312	99.9949	288.763	-1.22857e+06	39.9548	149.359	2.347	55.7661	0.157689	16.7853	1.18266	0.00280427	6.50042	0.194031	5.38978	8.22207	4.6724	0.115888	1.01085	59.6
2000	1311	99.995	288.669	-1.22872e+06	39.9514	149.358	2.352	55.7661	0.157689	16.7853	1.18294	0.00280427	6.50018	0.194031	5.38978	8.22207	4.6724	0.115888	1.01085	59.6
2000	1310	99.995	288.574	-1.22887e+06	39.948	149.358	2.356	55.7661	0.157689	16.7853	1.18321	0.00280427	6.49993	0.194031	5.38977	8.22207	4.6724	0.115887	1.01085	59.6
2000	1309	99.995	288.48	-1.22902e+06	39.9446	149.358	2.36	55.766	0.157689	16.7853	1.18348	0.00280427	6.49968	0.194031	5.38977	8.22207	4.6724	0.115887	1.01085	59.6
2000	1308	99.995	288.386	-1.22917e+06	39.9412	149.357	2.364	55.766	0.157689	16.7853	1.18376	0.00280427	6.49943	0.194031	5.38977	8.22206	4.6724	0.115887	1.01085	59.6
2000	1307	99.9951	288.291	-1.22932e+06	39.9379	149.357	2.369	55.766	0.157689	16.7853	1.18404	0.00280427	6.49918	0.194031	5.38977	8.22206	4.6724	0.115887	1.01085	59.6
2000	1306	99.9951	288.197	-1.22947e+06	39.9345	149.357	2.373	55.766	0.157689	16.7853	1.18432	0.00280426	6.49892	0.194031	5.38977	8.22206	4.6724	0.115887	1.01085	59.6
2000	1305	99.9951	288.102	-1.22962e+06	39.9311	149.356	2.377	55.766	0.157689	16.7853	1.1846	0.00280426	6.49867	0.194031	5.38977	8.22206	4.67239	0.115887	1.01085	59.6
2000	1304	99.9952	288.008	-1.22977e+06	39.9277	149.356	2.381	55.766	0.157689	16.7853	1.18489	0.00280426	6.49841	0.194031	5.38977	8.22206	4.67239	0.115887	1.01084	59.6
2000	1303	99.9952	287.913	-1.22992e+06	39.9243	149.356	2.386	55.766	0.157688	16.7853	1.18517	0.00280426	6.49815	0.194031	5.38976	8.22205	4.67239	0.115887	1.01084	59.7
2000	1302	99.9952	287.818	-1.23007e+06	39.9209	149.356	2.39	55.7659	0.157688	16.7853	1.18546	0.00280426	6.49789	0.194031	5.38976	8.22205	4.67239	0.115887	1.01084	59.7
2000	1301	99.9952	287.724	-1.23022e+06	39.9176	149.355	2.394	55.7659	0.157688	16.7853	1.18575	0.00280426	6.49762	0.194031	5.38976	8.22205	4.67239	0.115887	1.01084	59.7
2000	1300	99.9953	287.629	-1.23037e+06	39.9142	149.355	2.399	55.7659	0.157688	16.7852	1.18604	0.00280426	6.49736	0.194031	5.38976	8.22205	4.67239	0.115887	1.01084	59.7
2000	1299	99.9953	287.534	-1.23052e+06	39.9108	149.355	2.403	55.7659	0.157688	16.7852	1.18633	0.00280426	6.49709	0.194031	5.38976	8.22204	4.67239	0.115887	1.01084	59.7
2000	1298	99.9953	287.439	-1.23067e+06	39.9074	149.354	2.407	55.7659	0.157688	16.7852	1.18663	0.00280426	6.49683	0.194031	5.38976	8.22204	4.67239	0.115887	1.01084	59.7
2000	1297	99.9954	287.344	-1.23081e+06	39.904	149.354	2.412	55.7659	0.157688	16.7852	1.18693	0.00280426	6.49656	0.194031	5.38975	8.22204	4.67238	0.115887	1.01084	59.7
2000	1296	99.9954	287.249	-1.23096e+06	39.9007	149.354	2.416	55.7658	0.157688	16.7852	1.18722	0.00280426	6.49629	0.194031	5.38975	8.22204	4.67238	0.115887	1.01084	59.7
2000	1295	99.9954	287.154	-1.23111e+06	39.8973	149.353	2.42	55.7658	0.157688	16.7852	1.18752	0.00280426	6.49601	0.19403	5.38975	8.22203	4.67238	0.115887	1.01084	59.7
2000	1294	99.9955	287.058	-1.23126e+06	39.8939	149.353	2.425	55.7658	0.157688	16.7852	1.18783	0.00280425	6.49574	0.19403	5.38975	8.22203	4.67238	0.115887	1.01084	59.7
2000	1293	99.9955	286.963	-1.23141e+06	39.8905	149.353	2.429	55.7658	0.157688	16.7852	1.18813	0.00280425	6.49546	0.19403	5.38975	8.22203	4.67238	0.115887	1.01084	59.7
2000	1292	99.9955	286.868	-1.23156e+06	39.8871	149.352	2.433	55.7658	0.157688	16.7852	1.18844	0.00280425	6.49519	0.19403	5.38975	8.22203	4.67238	0.115887	1.01084	59.7
2000	1291	99.9955	286.772	-1.23171e+06	39.8838	149.352	2.438	55.7658	0.157688	16.7852	1.18874	0.00280425	6.49491	0.19403	5.38974	8.22202	4.67238	0.115887	1.01084	59.7
2000	1290	99.9956	286.677	-1.23186e+06	39.8804	149.352	2.442	55.7657	0.157688	16.7852	1.18905	0.00280425	6.49463	0.19403	5.38974	8.22202	4.67237	0.115887	1.01084	59.7
2000	1289	99.9956	286.581	-1.23201e+06	39.877	149.351	2.446	55.7657	0.157688	16.7852	1.18937	0.00280425	6.49434	0.19403	5.38974	8.22202	4.67237	0.115887	1.01084	59.7
2000	1288	99.9956	286.486	-1.23216e+06	39.8736	149.351	2.451	55.7657	0.157688	16.7852	1.18968	0.00280425	6.49406	0.19403	5.38974	8.22202	4.67237	0.115887	1.01084	59.7
2000	1287	99.9957	286.39	-1.23231e+06	39.8703	149.351	2.455	55.7657	0.157688	16.7852	1.18999	0.00280425	6.49377	0.19403	5.38974	8.22201	4.67237	0.115887	1.01084	59.7
2000	1286	99.9957	286.294	-1.23246e+06	39.8669	149.351	2.459	55.7657	0.157688	16.7852	1.19031	0.00280425	6.49349	0.19403	5.38974	8.22201	4.67237	0.115887	1.01084	59.7
2000	1285	99.9957	286.199	-1.23261e+06	39.8635	149.35	2.464	55.7657	0.157688	16.7852	1.19063	0.00280425	6.4932	0.19403	5.38973	8.22201	4.67237	0.115887	1.01084	59.7
2000	1284	99.9958	286.103	-1.23276e+06	39.8601	149.35	2.468	55.7656	0.157688	16.7852	1.19095	0.00280425	6.49291	0.19403	5.38973	8.22201	4.67236	0.115887	1.01084	59.7
2000	1283	99.9958	286.007	-1.23291e+06	39.8568	149.35	2.473	55.7656	0.157687	16.7852	1.19127	0.00280424	6.49261	0.19403	5.38973	8.222	4.67236	0.115887	1.01084	59.7
2000	1282	99.9958	285.911	-1.23306e+06	39.8534	149.349	2.477	55.7656	0.157687	16.7852	1.1916	0.00280424	6.49232	0.19403	5.38973	8.222	4.67236	0.115887	1.01084	59.7
2000	1281	99.9959	285.815	-1.23321e+06	39.85	149.349	2.481	55.7656	0.157687	16.7851	1.19192	0.00280424	6.49202	0.19403	5.38973	8.222	4.67236	0.115886	1.01084	59.7
2000	1280	99.9959	285.719	-1.23336e+06	39.8466	149.349	2.486	55.7656	0.157687	16.7851	1.19225	0.00280424	6.49172	0.19403	5.38973	8.22199	4.67236	0.115886	1.01084	59.7
2000	1279	99.9959	285.623	-1.23351e+06	39.8433	149.349	2.49	55.7655	0.157687	16.7851	1.19258	0.00280424	6.49142	0.194029	5.38972	8.22199	4.67236	0.115886	1.01084	59.7
2000	1278	99.996	285.527	-1.23366e+06	39.8399	149.348	2.495	55.7655	0.157687	16.7851	1.19292	0.00280424	6.49112	0.194029	5.38972	8.22199	4.67236	0.115886	1.01084	59.7
2000	1277	99.996	285.431	-1.23381e+06	39.8365	149.348	2.499	55.7655	0.157687	16.7851	1.19325	0.00280424	6.49082	0.194029	5.38972	8.22199	4.67235	0.115886	1.01084	59.7
2000	1276	99.996	285.334	-1.23396e+06	39.8331	149.348	2.504	55.7655	0.157687	16.7851	1.19359	0.00280424	6.49051	0.194029	5.38972	8.22198	4.67235	0.115886	1.01084	59.7
2000	1275	99.9961	285.238	-1.23411e+06	39.8298	149.347	2.508	55.7655	0.157687	16.7851	1.19392	0.00280424	6.49021	0.194029	5.38972	8.22198	4.67235	0.115886	1.01084	59.7
2000	1274	99.9961	285.141	-1.23426e+06	39.8264	149.347	2.512	55.7654	0.157687	16.7851	1.19427	0.00280424	6.4899	0.194029	5.38971	8.22198	4.67235	0.115886	1.01084	59.7
2000	1273	99.9961	285.045	-1.23441e+06	39.823	149.347	2.517	55.7654	0.157687	16.7851	1.19461	0.00280424	6.48959	0.194029	5.38971	8.22197	4.67235	0.115886	1.01083	59.7
2000	1272	99.9962	284.948	-1.23456e+06	39.8197	149.346	2.521	55.7654	0.157687	16.7851	1.19495	0.00280423	6.48928	0.194029	5.38971	8.22197	4.67235	0.115886	1.01083	59.7
2000	1271	99.9962	284.852	-1.23471e+06	39.8163	149.346	2.526	55.7654	0.157687	16.7851	1.1953	0.00280423	6.48896	0.194029	5.38971	8.22197	4.67234	0.115886	1.01083	59.7
2000	1270	99.9962	284.755	-1.23486e+06	39.8129	149.346	2.53	55.7654	0.157687	16.7851	1.19565	0.00280423	6.48865	0.194029	5.38971	8.22197	4.67234	0.115886	1.01083	59.7
2000	1269	99.9963	284.658	-1.23501e+06	39.8096	149.346	2.535	55.7654	0.157687	16.7851	1.196	0.00280423	6.48833	0.194029	5.38971	8.22196	4.67234	0.115886	1.01083	59.7
2000	1268	99.9963	284.562	-1.23516e+06	39.8062	149.345	2.539	55.7653	0.157687	16.7851	1.19635	0.00280423	6.48801	0.194029	5.3897	8.22196	4.67234	0.115886	1.01083	59.7
2000	1267	99.9963	284.465	-1.23531e+06	39.8028	149.345	2.544	55.7653	0.157687	16.7851	1.1967	0.00280423	6.48769	0.194029	5.3897	8.22196	4.67234	0.115886	1.01083	59.7
2000	1266	99.9964	284.368	-1.23546e+06	39.7994	149.345	2.548	55.7653	0.157687	16.7851	1.19706	0.00280423	6.48736	0.194029	5.3897	8.22195	4.67234	0.115886	1.01083	59.7
2000	1265	99.9964	284.271	-1.23561e+06	39.7961	149.345	2.553	55.7653	0.157687	16.7851	1.19742	0.00280423	6.48704	0.194029	5.3897	8.22195	4.67233	0.115886	1.01083	59.7
2000	1264	99.9965	284.174	-1.23576e+06	39.7927	149.344	2.557	55.7653	0.157686	16.785	1.19778	0.00280423	6.48671	0.194028	5.3897	8.22195	4.67233	0.115886	1.01083	59.7
2000	1263	99.9965	284.077	-1.23591e+06	39.7893	149.344	2.562	55.7652	0.157686	16.785	1.19814	0.00280423	6.48638	0.194028	5.38969	8.22195	4.67233	0.115886	1.01083	59.7
2000	1262	99.9965	283.979	-1.23606e+06	39.786	149.344	2.566	55.7652	0.157686	16.785	1.1985	0.00280422	6.48605	0.194028	5.38969	8.22194	4.67233	0.115886	1.01083	59.7
2000	1261	99.9966	283.882	-1.23621e+06	39.7826	149.343	2.571	55.7652	0.157686	16.785	1.19887	0.00280422	6.48572	0.194028	5.38969	8.22194	4.67233	0.115886	1.01083	59.7
2000	1260	99.9966	283.785	-1.23636e+06	39.7792	149.343	2.575	55.7652	0.157686	16.785	1.19924	0.00280422	6.48539	0.194028	5.38969	8.22194	4.67233	0.115886	1.01083	59.7
2000	1259	99.9966	283.687	-1.23651e+06	39.7759	149.343	2.58	55.7651	0.157686	16.785	1.19961	0.00280422	6.48505	0.194028	5.38969	8.22193	4.67232	0.115886	1.01083	59.7
2000	1258	99.9967	283.59	-1.23666e+06	39.7725	149.343	2.584	55.7651	0.157686	16.785	1.19998	0.00280422	6.48471	0.194028	5.38968	8.22193	4.67232	0.115886	1.01083	59.7
2000	1257	99.9967	283.493	-1.23681e+06	39.7692	149.342	2.589	55.7651	0.157686	16.785	1.20035	0.00280422	6.48437	0.194028	5.38968	8.22193	4.67232	0.115885	1.01083	59.7
2000	1256	99.9967	283.395	-1.23696e+06	39.7658	149.342	2.594	55.7651	0.157686	16.785	1.20073	0.00280422	6.48403	0.194028	5.38968	8.22192	4.67232	0.115885	1.01083	59.7
2000	1255	99.9968	283.297	-1.23711e+06	39.7624	149.342	2.598	55.7651	0.157686	16.785	1.20111	0.00280422	6.48369	0.194028	5.38968	8.22192	4.67232	0.115885	1.01083	59.7
2000	1254	99.9968	283.2	-1.23726e+06	39.7591	149.342	2.603	55.765	0.157686	16.785	1.20149	0.00280422	6.48334	0.194028	5.38968	8.22192	4.67232	0.115885	1.01083	59.7
2000	1253	99.9969	283.102	-1.23741e+06	39.7557	149.341	2.607	55.765	0.157686	16.785	1.20187	0.00280421	6.483	0.194028	5.38967	8.22192	4.67231	0.115885	1.01083	59.7
2000	1252	99.9969	283.004	-1.23756e+06	39.7523	149.341	2.612	55.765	0.157686	16.785	1.20226	0.00280421	6.48265	0.194028	5.38967	8.22191	4.67231	0.115885	1.01083	59.7
2000	1251	99.9969	282.906	-1.23771e+06	39.749	149.341	2.616	55.765	0.157686	16.785	1.20264	0.00280421	6.4823	0.194028	5.38967	8.22191	4.67231	0.115885	1.01083	59.7
2000	1250	99.997	282.808	-1.23786e+06	39.7456	149.341	2.621	55.765	0.157686	16.785	1.20303	0.00280421	6.48194	0.194027	5.38967	8.22191	4.67231	0.115885	1.01083	59.7
2000	1249	99.997	282.71	-1.23801e+06	39.7422	149.34	2.626	55.7649	0.157686	16.785	1.20342	0.00280421	6.48159	0.194027	5.38967	8.2219	4.67231	0.115885	1.01083	59.7
2000	1248	99.9971	282.612	-1.23816e+06	39.7389	149.34	2.63	55.7649	0.157686	16.7849	1.20382	0.00280421	6.48123	0.194027	5.38966	8.2219	4.6723	0.115885	1.01083	59.7
2000	1247	99.9971	282.514	-1.23831e+06	39.7355	149.34	2.635	55.7649	0.157685	16.7849	1.20421	0.00280421	6.48087	0.194027	5.38966	8.2219	4.6723	0.115885	1.01083	59.7
2000	1246	99.9971	282.416	-1.23846e+06	39.7322	149.34	2.639	55.7649	0.157685	16.7849	1.20461	0.00280421	6.48051	0.194027	5.38966	8.22189	4.6723	0.115885	1.01082	59.7
2000	1245	99.9972	282.318	-1.23861e+06	39.7288	149.339	2.644	55.7648	0.157685	16.7849	1.20501	0.00280421	6.48015	0.194027	5.38966	8.22189	4.6723	0.115885	1.01082	59.7
2000	1244	99.9972	282.219	-1.23876e+06	39.7255	149.339	2.649	55.7648	0.157685	16.7849	1.20541	0.0028042	6.47979	0.194027	5.38965	8.22189	4.6723	0.115885	1.01082	59.7
2000	1243	99.9973	282.121	-1.23891e+06	39.7221	149.339	2.653	55.7648	0.157685	16.7849	1.20581	0.0028042	6.47942	0.194027	5.38965	8.22188	4.6723	0.115885	1.01082	59.7
2000	1242	99.9973	282.023	-1.23906e+06	39.7187	149.339	2.658	55.7648	0.157685	16.7849	1.20622	0.0028042	6.47905	0.194027	5.38965	8.22188	4.67229	0.115885	1.01082	59.7
2000	1241	99.9973	281.924	-1.23921e+06	39.7154	149.338	2.663	55.7648	0.157685	16.7849	1.20663	0.0028042	6.47868	0.194027	5.38965	8.22188	4.67229	0.115885	1.01082	59.7
2000	1240	99.9974	281.825	-1.23936e+06	39.712	149.338	2.667	55.7647	0.157685	16.7849	1.20704	0.0028042	6.47831	0.194027	5.38965	8.22187	4.67229	0.115885	1.01082	59.7
2000	1239	99.9974	281.727	-1.23951e+06	39.7087	149.338	2.672	55.7647	0.157685	16.7849	1.20745	0.0028042	6.47793	0.194027	5.38964	8.22187	4.67229	0.115885	1.01082	59.7
2000	1238	99.9975	281.628	-1.23966e+06	39.7053	149.338	2.677	55.7647	0.157685	16.7849	1.20786	0.0028042	6.47756	0.194027	5.38964	8.22187	4.67229	0.115885	1.01082	59.7
2000	1237	99.9975	281.529	-1.23981e+06	39.7019	149.337	2.681	55.7647	0.157685	16.7849	1.20828	0.0028042	6.47718	0.194026	5.38964	8.22186	4.67228	0.115885	1.01082	59.7
2000	1236	99.9975	281.43	-1.23996e+06	39.6986	149.337	2.686	55.7646	0.157685	16.7849	1.2087	0.0028042	6.4768	0.194026	5.38964	8.22186	4.67228	0.115885	1.01082	59.7
2000	1235	99.9976	281.332	-1.24011e+06	39.6952	149.337	2.691	55.7646	0.157685	16.7849	1.20912	0.00280419	6.47642	0.194026	5.38963	8.22186	4.67228	0.115884	1.01082	59.7
2000	1234	99.9976	281.233	-1.24026e+06	39.6919	149.337	2.695	55.7646	0.157685	16.7848	1.20955	0.00280419	6.47603	0.194026	5.38963	8.22185	4.67228	0.115884	1.01082	59.7
2000	1233	99.9977	281.134	-1.24041e+06	39.6885	149.336	2.7	55.7646	0.157685	16.7848	1.20997	0.00280419	6.47565	0.194026	5.38963	8.22185	4.67228	0.115884	1.01082	59.7
2000	1232	99.9977	281.034	-1.24056e+06	39.6852	149.336	2.705	55.7645	0.157684	16.7848	1.2104	0.00280419	6.47526	0.194026	5.38963	8.22184	4.67227	0.115884	1.01082	59.7
2000	1231	99.9978	280.935	-1.24071e+06	39.6818	149.336	2.709	55.7645	0.157684	16.7848	1.21083	0.00280419	6.47487	0.194026	5.38962	8.22184	4.67227	0.115884	1.01082	59.7
2000	1230	99.9978	280.836	-1.24086e+06	39.6785	149.336	2.714	55.7645	0.157684	16.7848	1.21126	0.00280419	6.47448	0.194026	5.38962	8.22184	4.67227	0.115884	1.01082	59.7
2000	1229	99.9978	280.737	-1.24101e+06	39.6751	149.335	2.719	55.7645	0.157684	16.7848	1.2117	0.00280419	6.47408	0.194026	5.38962	8.22183	4.67227	0.115884	1.01082	59.7
2000	1228	99.9979	280.637	-1.24116e+06	39.6718	149.335	2.724	55.7644	0.157684	16.7848	1.21213	0.00280419	6.47368	0.194026	5.38962	8.22183	4.67227	0.115884	1.01082	59.7
2000	1227	99.9979	280.538	-1.24131e+06	39.6684	149.335	2.728	55.7644	0.157684	16.7848	1.21257	0.00280418	6.47329	0.194026	5.38962	8.22183	4.67226	0.115884	1.01082	59.7
2000	1226	99.998	280.438	-1.24146e+06	39.6651	149.335	2.733	55.7644	0.157684	16.7848	1.21301	0.00280418	6.47289	0.194026	5.38961	8.22182	4.67226	0.115884	1.01082	59.7
2000	1225	99.998	280.339	-1.24161e+06	39.6617	149.334	2.738	55.7644	0.157684	16.7848	1.21346	0.00280418	6.47248	0.194025	5.38961	8.22182	4.67226	0.115884	1.01082	59.7
2000	1224	99.9981	280.239	-1.24176e+06	39.6584	149.334	2.743	55.7643	0.157684	16.7848	1.2139	0.00280418	6.47208	0.194025	5.38961	8.22182	4.67226	0.115884	1.01082	59.7
2000	1223	99.9981	280.14	-1.24191e+06	39.655	149.334	2.747	55.7643	0.157684	16.7848	1.21435	0.00280418	6.47167	0.194025	5.38961	8.22181	4.67226	0.115884	1.01081	59.7
2000	1222	99.9982	280.04	-1.24206e+06	39.6517	149.334	2.752	55.7643	0.157684	16.7848	1.2148	0.00280418	6.47126	0.194025	5.3896	8.22181	4.67225	0.115884	1.01081	59.7
2000	1221	99.9982	279.94	-1.24221e+06	39.6483	149.334	2.757	55.7643	0.157684	16.7848	1.21526	0.00280418	6.47085	0.194025	5.3896	8.2218	4.67225	0.115884	1.01081	59.8
2000	1220	99.9982	279.84	-1.24236e+06	39.645	149.333	2.762	55.7642	0.157684	16.7847	1.21571	0.00280418	6.47044	0.194025	5.3896	8.2218	4.67225	0.115884	1.01081	59.8
2000	1219	99.9983	279.74	-1.24251e+06	39.6416	149.333	2.766	55.7642	0.157684	16.7847	1.21617	0.00280417	6.47002	0.194025	5.3896	8.2218	4.67225	0.115884	1.01081	59.8
2000	1218	99.9983	279.64	-1.24266e+06	39.6383	149.333	2.771	55.7642	0.157683	16.7847	1.21663	0.00280417	6.46961	0.194025	5.38959	8.22179	4.67224	0.115884	1.01081	59.8
2000	1217	99.9984	279.54	-1.24281e+06	39.6349	149.333	2.776	55.7642	0.157683	16.7847	1.21709	0.00280417	6.46919	0.194025	5.38959	8.22179	4.67224	0.115884	1.01081	59.8
2000	1216	99.9984	279.44	-1.24296e+06	39.6316	149.333	2.781	55.7641	0.157683	16.7847	1.21755	0.00280417	6.46877	0.194025	5.38959	8.22179	4.67224	0.115883	1.01081	59.8
2000	1215	99.9985	279.34	-1.24311e+06	39.6282	149.332	2.786	55.7641	0.157683	16.7847	1.21802	0.00280417	6.46834	0.194025	5.38959	8.22178	4.67224	0.115883	1.01081	59.8
2000	1214	99.9985	279.239	-1.24326e+06	39.6249	149.332	2.791	55.7641	0.157683	16.7847	1.21849	0.00280417	6.46792	0.194024	5.38958	8.22178	4.67224	0.115883	1.01081	59.8
2000	1213	99.9986	279.139	-1.24341e+06	39.6215	149.332	2.795	55.7641	0.157683	16.7847	1.21896	0.00280417	6.46749	0.194024	5.38958	8.22177	4.67223	0.115883	1.01081	59.8
2000	1212	99.9986	279.039	-1.24356e+06	39.6182	149.332	2.8	55.764	0.157683	16.7847	1.21944	0.00280417	6.46706	0.194024	5.38958	8.22177	4.67223	0.115883	1.01081	59.8
2000	1211	99.9987	278.938	-1.24371e+06	39.6148	149.331	2.805	55.764	0.157683	16.7847	1.21991	0.00280416	6.46663	0.194024	5.38958	8.22177	4.67223	0.115883	1.01081	59.8
2000	1210	99.9987	278.838	-1.24386e+06	39.6115	149.331	2.81	55.764	0.157683	16.7847	1.22039	0.00280416	6.46619	0.194024	5.38957	8.22176	4.67223	0.115883	1.01081	59.8
2000	1209	99.9988	278.737	-1.24401e+06	39.6082	149.331	2.815	55.764	0.157683	16.7847	1.22087	0.00280416	6.46575	0.194024	5.38957	8.22176	4.67222	0.115883	1.01081	59.8
2000	1208	99.9988	278.636	-1.24416e+06	39.6048	149.331	2.82	55.7639	0.157683	16.7847	1.22136	0.00280416	6.46532	0.194024	5.38957	8.22175	4.67222	0.115883	1.01081	59.8
2000	1207	99.9989	278.535	-1.24431e+06	39.6015	149.331	2.824	55.7639	0.157683	16.7846	1.22184	0.00280416	6.46487	0.194024	5.38957	8.22175	4.67222	0.115883	1.01081	59.8
2000	1206	99.9989	278.437	-1.24445e+06	39.5981	144.62	2.829	55.7639	0.157683	16.7846	1.22233	0.00280416	6.46443	0.194024	5.38956	8.22175	4.67222	0.115883	1.01081	59.8
2000	1205	99.999	278.34	-1.2446e+06	39.5948	144.619	2.834	55.7638	0.157683	16.7846	1.22282	0.00280416	6.46399	0.194024	5.38956	8.22174	4.67222	0.115883	1.01081	59.8
2000	1204	99.999	278.242	-1.24474e+06	39.5914	144.618	2.839	55.7638	0.157682	16.7846	1.22331	0.00280415	6.46354	0.194024	5.38956	8.22174	4.67221	0.115883	1.01081	59.8
2000	1203	99.9991	278.144	-1.24489e+06	39.5881	144.617	2.844	55.7638	0.157682	16.7846	1.22381	0.00280415	6.46309	0.194023	5.38955	8.22173	4.67221	0.115883	1.01081	59.8
2000	1202	99.9991	278.046	-1.24503e+06	39.5848	144.615	2.849	55.7638	0.157682	16.7846	1.22431	0.00280415	6.46264	0.194023	5.38955	8.22173	4.67221	0.115883	1.0108	59.8
2000	1201	99.9992	277.948	-1.24518e+06	39.5814	144.614	2.854	55.7637	0.157682	16.7846	1.22481	0.00280415	6.46218	0.194023	5.38955	8.22173	4.67221	0.115883	1.0108	59.8
2000	1200	99.9992	277.85	-1.24532e+06	39.5781	144.613	2.859	55.7637	0.157682	16.7846	1.22531	0.00280415	6.46173	0.194023	5.38955	8.22172	4.6722	0.115883	1.0108	59.8
2000	1199	99.9993	277.752	-1.24547e+06	39.5747	144.611	2.864	55.7637	0.157682	16.7846	1.22582	0.00280415	6.46127	0.194023	5.38954	8.22172	4.6722	0.115883	1.0108	59.8
2000	1198	99.9993	277.654	-1.24562e+06	39.5714	144.61	2.868	55.7637	0.157682	16.7846	1.22633	0.00280415	6.46081	0.194023	5.38954	8.22171	4.6722	0.115882	1.0108	59.8
2000	1197	99.9994	277.555	-1.24576e+06	39.5681	144.608	2.873	55.7636	0.157682	16.7846	1.22684	0.00280414	6.46034	0.194023	5.38954	8.22171	4.6722	0.115882	1.0108	59.8
2000	1196	99.9994	277.457	-1.24591e+06	39.5647	144.607	2.878	55.7636	0.157682	16.7845	1.22735	0.00280414	6.45988	0.194023	5.38954	8.2217	4.67219	0.115882	1.0108	59.8
2000	1195	99.9995	277.359	-1.24605e+06	39.5614	144.606	2.883	55.7636	0.157682	16.7845	1.22786	0.00280414	6.45941	0.194023	5.38953	8.2217	4.67219	0.115882	1.0108	59.8
2000	1194	99.9995	277.26	-1.2462e+06	39.558	144.604	2.888	55.7635	0.157682	16.7845	1.22838	0.00280414	6.45894	0.194023	5.38953	8.2217	4.67219	0.115882	1.0108	59.8
2000	1193	99.9996	277.162	-1.24634e+06	39.5547	144.603	2.893	55.7635	0.157682	16.7845	1.2289	0.00280414	6.45847	0.194022	5.38953	8.22169	4.67219	0.115882	1.0108	59.8
2000	1192	99.9996	277.063	-1.24649e+06	39.5514	144.602	2.898	55.7635	0.157681	16.7845	1.22943	0.00280414	6.45799	0.194022	5.38952	8.22169	4.67218	0.115882	1.0108	59.8
2000	1191	99.9997	276.965	-1.24663e+06	39.548	144.6	2.903	55.7635	0.157681	16.7845	1.22995	0.00280414	6.45752	0.194022	5.38952	8.22168	4.67218	0.115882	1.0108	59.8
2000	1190	99.9997	276.866	-1.24678e+06	39.5447	144.599	2.908	55.7634	0.157681	16.7845	1.23048	0.00280413	6.45704	0.194022	5.38952	8.22168	4.67218	0.115882	1.0108	59.8
2000	1189	99.9998	276.767	-1.24692e+06	39.5414	144.597	2.913	55.7634	0.157681	16.7845	1.23101	0.00280413	6.45655	0.194022	5.38952	8.22167	4.67218	0.115882	1.0108	59.8
2000	1188	99.9998	276.668	-1.24707e+06	39.538	144.596	2.918	55.7634	0.157681	16.7845	1.23154	0.00280413	6.45607	0.194022	5.38951	8.22167	4.67217	0.115882	1.0108	59.8
2000	1187	99.9999	276.569	-1.24721e+06	39.5347	144.595	2.923	55.7633	0.157681	16.7845	1.23208	0.00280413	6.45558	0.194022	5.38951	8.22167	4.67217	0.115882	1.0108	59.8
2000	1186	99.9999	276.471	-1.24736e+06	39.5314	144.593	2.928	55.7633	0.157681	16.7845	1.23262	0.00280413	6.4551	0.194022	5.38951	8.22166	4.67217	0.115882	1.0108	59.8
2000	1185	100	276.371	-1.24751e+06	39.528	144.592	2.933	55.7633	0.157681	16.7845	1.23316	0.00280413	6.4546	0.194022	5.3895	8.22166	4.67217	0.115882	1.0108	59.8
2000	1184	100	276.272	-1.24765e+06	39.5247	144.59	2.938	55.7632	0.157681	16.7844	1.2337	0.00280413	6.45411	0.194021	5.3895	8.22165	4.67216	0.115882	1.0108	59.8
2000	1183	100	276.173	-1.2478e+06	39.5214	144.589	2.943	55.7632	0.157681	16.7844	1.23425	0.00280412	6.45362	0.194021	5.3895	8.22165	4.67216	0.115882	1.01079	59.8
2000	1182	100	276.074	-1.24794e+06	39.518	144.587	2.948	55.7632	0.157681	16.7844	1.2348	0.00280412	6.45312	0.194021	5.3895	8.22164	4.67216	0.115881	1.01079	59.8
2000	1181	100	275.975	-1.24809e+06	39.5147	144.586	2.953	55.7631	0.157681	16.7844	1.23535	0.00280412	6.45262	0.194021	5.38949	8.22164	4.67216	0.115881	1.01079	59.8
2000	1180	100	275.875	-1.24823e+06	39.5114	144.585	2.958	55.7631	0.15768	16.7844	1.2359	0.00280412	6.45211	0.194021	5.38949	8.22163	4.67215	0.115881	1.01079	59.8
2000	1179	100	275.776	-1.24838e+06	39.5081	144.583	2.963	55.7631	0.15768	16.7844	1.23646	0.00280412	6.45161	0.194021	5.38949	8.22163	4.67215	0.115881	1.01079	59.8
2000	1178	100	275.676	-1.24852e+06	39.5047	144.582	2.968	55.7631	0.15768	16.7844	1.23702	0.00280412	6.4511	0.194021	5.38948	8.22163	4.67215	0.115881	1.01079	59.8
2000	1177	100	275.577	-1.24867e+06	39.5014	144.58	2.973	55.763	0.15768	16.7844	1.23758	0.00280411	6.45059	0.194021	5.38948	8.22162	4.67215	0.115881	1.01079	59.8
2000	1176	100.001	275.477	-1.24881e+06	39.4981	144.579	2.979	55.763	0.15768	16.7844	1.23815	0.00280411	6.45008	0.194021	5.38948	8.22162	4.67214	0.115881	1.01079	59.8
2000	1175	100.001	275.377	-1.24896e+06	39.4947	144.577	2.984	55.763	0.15768	16.7844	1.23872	0.00280411	6.44956	0.194021	5.38947	8.22161	4.67214	0.115881	1.01079	59.8
2000	1174	100.001	275.278	-1.24911e+06	39.4914	144.576	2.989	55.7629	0.15768	16.7843	1.23929	0.00280411	6.44905	0.19402	5.38947	8.22161	4.67214	0.115881	1.01079	59.8
2000	1173	100.001	275.178	-1.24925e+06	39.4881	144.574	2.994	55.7629	0.15768	16.7843	1.23986	0.00280411	6.44853	0.19402	5.38947	8.2216	4.67214	0.115881	1.01079	59.8
2000	1172	100.001	275.078	-1.2494e+06	39.4848	144.573	2.999	55.7629	0.15768	16.7843	1.24043	0.00280411	6.448	0.19402	5.38946	8.2216	4.67213	0.115881	1.01079	59.8
2000	1171	100.001	274.978	-1.24954e+06	39.4814	144.571	3.004	55.7628	0.15768	16.7843	1.24101	0.0028041	6.44748	0.19402	5.38946	8.22159	4.67213	0.115881	1.01079	59.8
2000	1170	100.001	274.878	-1.24969e+06	39.4781	144.57	3.009	55.7628	0.15768	16.7843	1.24159	0.0028041	6.44695	0.19402	5.38946	8.22159	4.67213	0.115881	1.01079	59.8
2000	1169	100.001	274.778	-1.24983e+06	39.4748	144.568	3.014	55.7628	0.157679	16.7843	1.24218	0.0028041	6.44642	0.19402	5.38946	8.22158	4.67212	0.115881	1.01079	59.8
2000	1168	100.001	274.678	-1.24998e+06	39.4715	144.567	3.019	55.7627	0.157679	16.7843	1.24276	0.0028041	6.44589	0.19402	5.38945	8.22158	4.67212	0.115881	1.01079	59.8
2000	1167	100.001	274.577	-1.25012e+06	39.4681	144.565	3.024	55.7627	0.157679	16.7843	1.24335	0.0028041	6.44536	0.19402	5.38945	8.22157	4.67212	0.11588	1.01079	59.8
2000	1166	100.001	274.477	-1.25027e+06	39.4648	144.563	3.03	55.7627	0.157679	16.7843	1.24395	0.0028041	6.44482	0.194019	5.38945	8.22157	4.67212	0.11588	1.01078	59.8
2000	1165	100.001	274.377	-1.25041e+06	39.4615	144.562	3.035	55.7626	0.157679	16.7843	1.24454	0.00280409	6.44428	0.194019	5.38944	8.22156	4.67211	0.11588	1.01078	59.8
2000	1164	100.001	274.276	-1.25056e+06	39.4582	144.56	3.04	55.7626	0.157679	16.7843	1.24514	0.00280409	6.44374	0.194019	5.38944	8.22156	4.67211	0.11588	1.01078	59.9
2000	1163	99.7474	273.504	-1.24758e+06	39.3643	144.153	3.05	55.7649	0.15804	16.8211	1.24513	0.00281123	6.43371	0.194513	5.32939	8.2369	4.68393	0.116175	1.01336	59.6
2000	1162	99.6254	273.081	-1.24622e+06	39.3174	143.957	3.058	55.7661	0.158214	16.8389	1.24543	0.00281467	6.42855	0.194751	5.30045	8.24427	4.68963	0.116317	1.0146	59.5
2000	1161	98.6388	270.37	-1.23346e+06	38.9394	142.473	3.062	55.8028	0.159746	16.7859	1.25314	0.00284282	6.45988	0.196699	5.26078	8.22356	4.71254	0.11738	1.02474	59.2
2000	1160	97.7223	267.846	-1.22161e+06	38.5882	141.094	3.067	55.8371	0.161195	16.7373	1.26038	0.00286949	6.48885	0.198544	5.22201	8.20462	4.73431	0.118386	1.03436	58.9
2000	1159	96.8226	265.368	-1.20999e+06	38.2434	139.741	3.071	55.8714	0.162645	16.6889	1.26761	0.00289615	6.51766	0.200389	5.18348	8.18575	4.75598	0.11939	1.04397	58.6
2000	1158	95.9393	262.936	-1.19858e+06	37.9048	138.413	3.076	55.9055	0.164095	16.6405	1.27483	0.00292281	6.54631	0.202234	5.14518	8.16696	4.77755	0.120394	1.05358	58.3
2000	1157	95.0039	260.373	-1.18661e+06	37.5498	137.001	3.082	55.9446	0.165515	16.6199	1.2807	0.00295159	6.57474	0.204225	5.09849	8.1188	4.80461	0.121495	1.06395	58
2000	1156	94.0962	257.884	-1.17499e+06	37.2047	135.632	3.089	55.9829	0.166937	16.5955	1.28672	0.00298006	6.60301	0.206195	5.05335	8.07486	4.83075	0.12258	1.07422	57.7
2000	1155	93.2066	255.444	-1.16359e+06	36.8665	134.29	3.095	56.021	0.168355	16.5709	1.29273	0.00300851	6.63112	0.208163	5.00862	8.03123	4.85672	0.123664	1.08447	57.4
2000	1154	92.3344	253.052	-1.15242e+06	36.5349	132.976	3.101	56.0589	0.169771	16.5463	1.29872	0.00303692	6.65907	0.210129	4.96428	7.9879	4.88251	0.124745	1.09471	57.1
2000	1153	91.4554	250.646	-1.14122e+06	36.2015	131.654	3.108	56.0992	0.171225	16.5223	1.30402	0.00306611	6.68247	0.212149	4.92017	7.94521	4.90914	0.125855	1.10523	56.8
2000	1152	90.5883	248.271	-1.13017e+06	35.8726	130.35	3.114	56.1395	0.17269	16.4976	1.30934	0.00309546	6.70565	0.21418	4.87597	7.90347	4.93572	0.12697	1.11581	56.4
2000	1151	89.7381	245.943	-1.11934e+06	35.55	129.072	3.12	56.1796	0.174152	16.4728	1.31464	0.00312479	6.72867	0.216209	4.83217	7.86201	4.96213	0.128083	1.12638	56.1
2000	1150	88.9044	243.66	-1.10872e+06	35.2336	127.82	3.127	56.2195	0.175612	16.4479	1.31992	0.00315409	6.75154	0.218236	4.78876	7.82082	4.98837	0.129194	1.13695	55.8
2000	1149	88.0866	241.42	-1.0983e+06	34.9233	126.591	3.133	56.2593	0.177068	16.4228	1.32519	0.00318337	6.77425	0.220262	4.74574	7.77991	5.01445	0.130303	1.1475	55.5
2000	1148	87.2844	239.223	-1.08808e+06	34.6187	125.387	3.139	56.2989	0.178522	16.3976	1.33045	0.00321263	6.79682	0.222287	4.70311	7.73928	5.04037	0.131409	1.15805	55.2
2000	1147	86.4972	237.066	-1.07806e+06	34.3198	124.205	3.145	56.3382	0.179974	16.3723	1.33569	0.00324187	6.81924	0.22431	4.66086	7.69892	5.06612	0.132513	1.16859	54.9
2000	1146	85.7247	234.949	-1.06822e+06	34.0265	123.046	3.152	56.3774	0.181422	16.3469	1.34091	0.00327108	6.84152	0.226331	4.61899	7.65882	5.09171	0.133616	1.17912	54.6
2000	1145	84.9665	232.871	-1.05857e+06	33.7384	121.908	3.158	56.4164	0.182868	16.3213	1.34613	0.00330027	6.86366	0.228351	4.57749	7.619	5.11714	0.134716	1.18964	54.3
2000	1144	84.222	230.831	-1.04909e+06	33.4556	120.792	3.164	56.4553	0.184312	16.2956	1.35132	0.00332945	6.88565	0.230369	4.53636	7.57944	5.1424	0.135814	1.20016	54
2000	1143	83.4911	228.827	-1.03979e+06	33.1778	119.696	3.17	56.4939	0.185753	16.2697	1.35651	0.0033586	6.90751	0.232386	4.4956	7.54014	5.16752	0.13691	1.21066	53.7
2000	1142	82.7732	226.859	-1.03065e+06	32.9049	118.62	3.176	56.5324	0.187192	16.2438	1.36169	0.00338772	6.92923	0.234402	4.45519	7.5011	5.19247	0.138004	1.22116	53.4
2000	1141	82.068	224.925	-1.02168e+06	32.6368	117.563	3.182	56.5707	0.188628	16.2177	1.36685	0.00341683	6.95082	0.236416	4.41515	7.46233	5.21727	0.139095	1.23166	53.1
2000	1140	81.3752	223.025	-1.01286e+06	32.3734	116.525	3.187	56.6088	0.190062	16.1915	1.372	0.00344592	6.97227	0.238428	4.37546	7.4238	5.24191	0.140185	1.24214	52.8
2000	1139	80.6945	221.158	-1.0042e+06	32.1145	115.506	3.193	56.6467	0.191493	16.1652	1.37714	0.00347499	6.9936	0.24044	4.33612	7.38553	5.2664	0.141273	1.25262	52.5
2000	1138	80.0256	219.323	-995691	31.86	114.504	3.199	56.6845	0.192922	16.1387	1.38227	0.00350404	7.0148	0.24245	4.29713	7.34751	5.29074	0.142359	1.26309	52.2
2000	1137	79.368	217.519	-987328	31.6098	113.52	3.205	56.7221	0.194349	16.1122	1.38738	0.00353307	7.03587	0.244458	4.25848	7.30975	5.31492	0.143443	1.27356	51.9
2000	1136	78.7216	215.746	-979107	31.3638	112.553	3.21	56.7595	0.195774	16.0855	1.39249	0.00356208	7.05681	0.246466	4.22017	7.27222	5.33896	0.144524	1.28401	51.6
2000	1135	78.086	214.002	-971025	31.1219	111.602	3.216	56.7967	0.197196	16.0587	1.39759	0.00359107	7.07763	0.248472	4.1822	7.23495	5.36285	0.145604	1.29446	51.3
2000	1134	77.461	212.286	-963078	30.8839	110.668	3.222	56.8338	0.198616	16.0318	1.40268	0.00362005	7.09834	0.250476	4.14456	7.19792	5.38659	0.146682	1.30491	51
2000	1133	76.8463	210.599	-955264	30.6498	109.749	3.227	56.8707	0.200035	16.0048	1.40775	0.003649	7.11892	0.25248	4.10725	7.16112	5.41018	0.147758	1.31535	50.7
2000	1132	76.2417	208.939	-947577	30.4194	108.845	3.233	56.9074	0.201451	15.9777	1.41282	0.00367794	7.13938	0.254482	4.07027	7.12457	5.43363	0.148832	1.32578	50.4
2000	1131	75.6468	207.306	-940016	30.1928	107.956	3.238	56.944	0.202865	15.9505	1.41788	0.00370687	7.15973	0.256483	4.0336	7.08826	5.45693	0.149904	1.3362	50.1
2000	1130	75.0615	205.698	-932578	29.9697	107.082	3.244	56.9804	0.204277	15.9231	1.42293	0.00373577	7.17996	0.258484	3.99726	7.05218	5.48009	0.150974	1.34662	49.8
2000	1129	74.4855	204.116	-925258	29.7501	106.222	3.249	57.0166	0.205687	15.8957	1.42798	0.00376466	7.20008	0.260482	3.96123	7.01633	5.50311	0.152042	1.35704	49.5
2000	1128	73.9186	202.559	-918055	29.534	105.376	3.254	57.0526	0.207095	15.8681	1.43301	0.00379354	7.22009	0.26248	3.92552	6.98071	5.52599	0.153109	1.36745	49.2
2000	1127	73.3605	201.026	-910965	29.3212	104.543	3.259	57.0885	0.208502	15.8405	1.43804	0.00382239	7.23999	0.264477	3.89011	6.94533	5.54873	0.154173	1.37785	48.9
2000	1126	72.8111	199.517	-903986	29.1116	103.723	3.265	57.1242	0.209906	15.8127	1.44306	0.00385124	7.25978	0.266473	3.85501	6.91017	5.57133	0.155236	1.38824	48.6
2000	1125	72.2701	198.03	-897114	28.9052	102.916	3.27	57.1598	0.211309	15.7849	1.44807	0.00388007	7.27946	0.268467	3.82022	6.87523	5.59379	0.156297	1.39864	48.3
2000	1124	71.7374	196.566	-890349	28.7019	102.122	3.275	57.1952	0.21271	15.7569	1.45308	0.00390888	7.29904	0.270461	3.78572	6.84052	5.61611	0.157356	1.40902	48
2000	1123	71.2127	195.124	-883686	28.5016	101.34	3.28	57.2304	0.214109	15.7288	1.45808	0.00393768	7.31851	0.272454	3.75152	6.80603	5.6383	0.158413	1.4194	47.7
2000	1122	70.6959	193.703	-877123	28.3043	100.57	3.285	57.2655	0.215506	15.7007	1.46307	0.00396647	7.33787	0.274446	3.71761	6.77176	5.66036	0.159468	1.42978	47.4
2000	1121	70.1867	192.303	-870659	28.1098	99.8113	3.29	57.3004	0.216902	15.6724	1.46806	0.00399524	7.35714	0.276436	3.68399	6.73771	5.68228	0.160522	1.44015	47.2
2000	1120	69.6851	190.924	-864291	27.9182	99.0642	3.295	57.3351	0.218297	15.6441	1.47304	0.004024	7.3763	0.278426	3.65066	6.70388	5.70407	0.161573	1.45052	46.9
2000	1119	69.1908	189.565	-858017	27.7293	98.3283	3.3	57.3697	0.219689	15.6157	1.47802	0.00405275	7.39537	0.280415	3.61762	6.67026	5.72572	0.162623	1.46088	46.6
2000	1118	68.7036	188.225	-851834	27.5432	97.6032	3.305	57.4041	0.22108	15.5871	1.48299	0.00408148	7.41434	0.282404	3.58486	6.63685	5.74725	0.163672	1.47124	46.3
2000	1117	68.2235	186.904	-845741	27.3596	96.8888	3.31	57.4384	0.22247	15.5585	1.48795	0.00411021	7.43321	0.284391	3.55237	6.60365	5.76865	0.164718	1.4816	46
2000	1116	67.7502	185.602	-839736	27.1787	96.1848	3.315	57.4725	0.223858	15.5298	1.49291	0.00413892	7.45198	0.286378	3.52016	6.57066	5.78991	0.165763	1.49195	45.7
2000	1115	67.2836	184.318	-833816	27.0002	95.4909	3.319	57.5065	0.225245	15.501	1.49787	0.00416762	7.47066	0.288364	3.48823	6.53788	5.81105	0.166806	1.50229	45.4
2000	1114	66.8236	183.052	-827980	26.8242	94.807	3.324	57.5403	0.22663	15.4721	1.50282	0.00419631	7.48924	0.290349	3.45656	6.50531	5.83207	0.167848	1.51263	45.1
2000	1113	66.3699	181.804	-822225	26.6506	94.1328	3.329	57.5739	0.228014	15.4431	1.50776	0.004225	7.50774	0.292334	3.42517	6.47294	5.85296	0.168887	1.52297	44.8
2000	1112	65.9226	180.572	-816551	26.4794	93.4681	3.334	57.6074	0.229396	15.414	1.5127	0.00425367	7.52614	0.294317	3.39403	6.44077	5.87372	0.169925	1.53331	44.6
2000	1111	65.4813	179.357	-810955	26.3105	92.8127	3.338	57.6407	0.230778	15.3849	1.51764	0.00428233	7.54445	0.296301	3.36316	6.4088	5.89436	0.170962	1.54364	44.3
2000	1110	65.0461	178.159	-805436	26.1438	92.1664	3.343	57.6739	0.232158	15.3557	1.52258	0.00431099	7.56267	0.298283	3.33255	6.37703	5.91488	0.171997	1.55397	44
2000	1109	64.6167	176.977	-799992	25.9794	91.5291	3.347	57.7069	0.233536	15.3263	1.52751	0.00433963	7.5808	0.300265	3.3022	6.34546	5.93527	0.17303	1.56429	43.7
2000	1108	64.1931	175.81	-794621	25.8171	90.9004	3.352	57.7398	0.234914	15.2969	1.53243	0.00436827	7.59885	0.302247	3.2721	6.31409	5.95554	0.174061	1.57462	43.4
2000	1107	63.7751	174.659	-789322	25.6569	90.2803	3.356	57.7726	0.23629	15.2675	1.53736	0.0043969	7.61681	0.304228	3.24225	6.28291	5.9757	0.175091	1.58494	43.1
2000	1106	63.3626	173.523	-784094	25.4988	89.6685	3.361	57.8051	0.237666	15.2379	1.54228	0.00442552	7.63468	0.306208	3.21266	6.25192	5.99573	0.176119	1.59526	42.9
2000	1105	62.9556	172.401	-778934	25.3428	89.0649	3.365	57.8376	0.23904	15.2083	1.5472	0.00445414	7.65247	0.308188	3.18331	6.22113	6.01565	0.177146	1.60557	42.6
2000	1104	62.5538	171.294	-773842	25.1887	88.4694	3.369	57.8699	0.240413	15.1786	1.55211	0.00448275	7.67017	0.310168	3.1542	6.19052	6.03545	0.178171	1.61588	42.3
2000	1103	62.1572	170.201	-768817	25.0366	87.8816	3.374	57.902	0.241785	15.1488	1.55703	0.00451135	7.68779	0.312147	3.12533	6.1601	6.05513	0.179195	1.62619	42
2000	1102	61.7656	169.122	-763856	24.8863	87.3016	3.378	57.934	0.243156	15.1189	1.56194	0.00453995	7.70533	0.314126	3.09671	6.12987	6.0747	0.180217	1.6365	41.7
2000	1101	61.3791	168.056	-758958	24.738	86.7291	3.382	57.9659	0.244526	15.0889	1.56685	0.00456854	7.72279	0.316104	3.06832	6.09982	6.09415	0.181237	1.64681	41.5
2000	1100	60.9974	167.004	-754123	24.5915	86.164	3.386	57.9976	0.245895	15.0589	1.57175	0.00459713	7.74017	0.318082	3.04017	6.06996	6.11349	0.182256	1.65711	41.2
2000	1099	60.6205	165.965	-749349	24.4467	85.6061	3.39	58.0292	0.247263	15.0288	1.57666	0.00462571	7.75747	0.32006	3.01224	6.04028	6.13271	0.183274	1.66742	40.9
2000	1098	60.2482	164.939	-744634	24.3038	85.0553	3.394	58.0606	0.248631	14.9987	1.58156	0.00465429	7.77468	0.322037	2.98455	6.01078	6.15183	0.18429	1.67772	40.6
2000	1097	59.8806	163.925	-739979	24.1625	84.5114	3.398	58.0919	0.249997	14.9684	1.58647	0.00468287	7.79183	0.324014	2.95709	5.98146	6.17083	0.185304	1.68802	40.3
2000	1096	59.5174	162.923	-735380	24.023	83.9744	3.403	58.123	0.251363	14.9381	1.59137	0.00471144	7.80889	0.325991	2.92985	5.95232	6.18972	0.186317	1.69832	40.1
2000	1095	59.1587	161.934	-730838	23.8851	83.4441	3.406	58.154	0.252728	14.9078	1.59627	0.00474001	7.82588	0.327968	2.90284	5.92335	6.2085	0.187329	1.70862	39.8
2000	1094	58.8043	160.956	-726351	23.7489	82.9203	3.41	58.1849	0.254092	14.8773	1.60116	0.00476857	7.84279	0.329945	2.87604	5.89456	6.22717	0.188339	1.71891	39.5
2000	1093	58.4542	159.99	-721919	23.6142	82.4029	3.414	58.2156	0.255455	14.8468	1.60606	0.00479714	7.85962	0.331921	2.84947	5.86594	6.24574	0.189347	1.72921	39.2
2000	1092	58.1082	159.035	-717540	23.4811	81.8918	3.418	58.2462	0.256818	14.8163	1.61096	0.0048257	7.87638	0.333897	2.82311	5.8375	6.26419	0.190355	1.73951	39
2000	1091	57.7663	158.091	-713212	23.3496	81.3869	3.422	58.2766	0.25818	14.7856	1.61586	0.00485426	7.89307	0.335873	2.79697	5.80922	6.28255	0.19136	1.7498	38.7
2000	1090	57.4284	157.159	-708936	23.2196	80.8881	3.426	58.307	0.259542	14.7549	1.62075	0.00488282	7.90968	0.33785	2.77104	5.78112	6.30079	0.192365	1.7601	38.4
2000	1089	57.0944	156.237	-704711	23.091	80.3952	3.43	58.3371	0.260903	14.7241	1.62565	0.00491138	7.92622	0.339826	2.74532	5.75318	6.31893	0.193368	1.77039	38.2
2000	1088	56.7643	155.326	-700534	22.9639	79.9082	3.433	58.3672	0.262263	14.6933	1.63054	0.00493994	7.94269	0.341802	2.71981	5.72541	6.33697	0.194369	1.78069	37.9
2000	1087	56.438	154.425	-696406	22.8382	79.4269	3.437	58.3971	0.263623	14.6624	1.63544	0.00496851	7.95909	0.343778	2.6945	5.69781	6.3549	0.195369	1.79098	37.6
2000	1086	56.1155	153.534	-692325	22.714	78.9513	3.441	58.4269	0.264982	14.6315	1.64033	0.00499707	7.97541	0.345754	2.6694	5.67037	6.37273	0.196368	1.80128	37.4
2000	1085	55.7965	152.653	-688291	22.5911	78.4811	3.444	58.4565	0.266341	14.6005	1.64523	0.00502563	7.99167	0.34773	2.64451	5.6431	6.39046	0.197365	1.81157	37.1
2000	1084	55.4812	151.782	-684303	22.4695	78.0164	3.448	58.4861	0.267699	14.5694	1.65013	0.00505419	8.00785	0.349707	2.61981	5.61598	6.40809	0.198362	1.82187	36.8
2000	1083	55.1694	150.921	-680360	22.3493	77.557	3.451	58.5154	0.269057	14.5383	1.65502	0.00508276	8.02397	0.351683	2.59531	5.58903	6.42562	0.199356	1.83217	36.6
2000	1082	54.8611	150.069	-676461	22.2304	77.1029	3.455	58.5447	0.270414	14.5071	1.65992	0.00511132	8.04001	0.35366	2.57101	5.56224	6.44305	0.20035	1.84246	36.3
2000	1081	54.5561	149.226	-672605	22.1128	76.6539	3.458	58.5738	0.271771	14.4758	1.66482	0.00513989	8.05599	0.355637	2.5469	5.5356	6.46038	0.201342	1.85276	36
2000	1080	54.2545	148.393	-668792	21.9964	76.2099	3.462	58.6028	0.273128	14.4445	1.66971	0.00516847	8.0719	0.357614	2.52299	5.50912	6.47761	0.202332	1.86306	35.8
2000	1079	53.9562	147.568	-665021	21.8813	75.7709	3.465	58.6317	0.274484	14.4132	1.67461	0.00519704	8.08774	0.359591	2.49926	5.4828	6.49474	0.203322	1.87336	35.5
2000	1078	53.6611	146.753	-661291	21.7674	75.3367	3.469	58.6605	0.27584	14.3818	1.67951	0.00522562	8.10352	0.361568	2.47573	5.45663	6.51178	0.20431	1.88367	35.2
2000	1077	53.3692	145.946	-657602	21.6546	74.9074	3.472	58.6891	0.277196	14.3503	1.68442	0.00525421	8.11922	0.363546	2.45238	5.43062	6.52872	0.205297	1.89397	35
2000	1076	53.0804	145.147	-653952	21.5431	74.4827	3.475	58.7176	0.278552	14.3188	1.68932	0.0052828	8.13486	0.365524	2.42922	5.40476	6.54557	0.206282	1.90427	34.7
2000	1075	52.7946	144.357	-650341	21.4327	74.0627	3.479	58.7459	0.279907	14.2872	1.69422	0.00531139	8.15044	0.367503	2.40625	5.37904	6.56232	0.207267	1.91458	34.5
2000	1074	52.5119	143.575	-646769	21.3234	73.6472	3.482	58.7742	0.281262	14.2556	1.69913	0.00533999	8.16595	0.369481	2.38345	5.35348	6.57898	0.20825	1.92489	34.2
2000	1073	52.2321	142.802	-643234	21.2153	73.2362	3.485	58.8023	0.282617	14.2239	1.70403	0.00536859	8.18139	0.371461	2.36084	5.32807	6.59555	0.209232	1.9352	34
2000	1072	51.9552	142.036	-639736	21.1082	72.8295	3.488	58.8303	0.283972	14.1922	1.70894	0.0053972	8.19677	0.37344	2.33841	5.3028	6.61203	0.210212	1.94551	33.7
2000	1071	51.6812	141.278	-636275	21.0023	72.4272	3.491	58.8582	0.285326	14.1604	1.71385	0.00542582	8.21209	0.37542	2.31615	5.27768	6.62841	0.211192	1.95583	33.4
2000	1070	51.41	140.528	-632850	20.8974	72.0291	3.494	58.886	0.286681	14.1286	1.71876	0.00545444	8.22734	0.3774	2.29407	5.25271	6.6447	0.21217	1.96615	33.2
2000	1069	51.1416	139.785	-629460	20.7935	71.6352	3.498	58.9136	0.288035	14.0967	1.72367	0.00548307	8.24252	0.379381	2.27216	5.22788	6.6609	0.213147	1.97647	32.9
2000	1068	50.8759	139.05	-626105	20.6907	71.2454	3.501	58.9411	0.28939	14.0648	1.72859	0.0055117	8.25764	0.381363	2.25042	5.20319	6.67702	0.214122	1.98679	32.7
2000	1067	50.6128	138.322	-622784	20.5888	70.8596	3.504	58.9685	0.290744	14.0329	1.73351	0.00554035	8.2727	0.383345	2.22886	5.17865	6.69304	0.215097	1.99711	32.4
2000	1066	50.3524	137.601	-619496	20.488	70.4778	3.507	58.9958	0.292098	14.0009	1.73842	0.005569	8.2877	0.385327	2.20746	5.15425	6.70898	0.21607	2.00744	32.2
2000	1065	50.0946	136.888	-616242	20.3881	70.0999	3.509	59.023	0.293453	13.9688	1.74335	0.00559766	8.30263	0.38731	2.18623	5.12998	6.72483	0.217042	2.01777	31.9
2000	1064	49.8393	136.181	-613020	20.2893	69.7259	3.512	59.05	0.294807	13.9367	1.74827	0.00562633	8.3175	0.389294	2.16517	5.10586	6.74059	0.218013	2.02811	31.7
2000	1063	49.5866	135.482	-609830	20.1913	69.3556	3.515	59.077	0.296162	13.9046	1.75319	0.00565501	8.3323	0.391278	2.14427	5.08187	6.75626	0.218983	2.03845	31.4
2000	1062	49.3363	134.789	-606671	20.0943	68.9891	3.518	59.1038	0.297516	13.8724	1.75812	0.0056837	8.34705	0.393263	2.12353	5.05802	6.77185	0.219951	2.04879	31.2
2000	1061	49.0884	134.102	-603544	19.9982	68.6262	3.521	59.1305	0.298871	13.8402	1.76305	0.0057124	8.36173	0.395249	2.10296	5.0343	6.78736	0.220919	2.05913	30.9
2000	1060	48.843	133.423	-600447	19.903	68.2669	3.524	59.1571	0.300226	13.8079	1.76799	0.00574111	8.37635	0.397235	2.08255	5.01072	6.80278	0.221885	2.06948	30.7
2000	1059	48.5999	132.749	-597380	19.8087	67.9111	3.526	59.1836	0.301581	13.7756	1.77292	0.00576983	8.39091	0.399223	2.06229	4.98728	6.81812	0.22285	2.07983	30.4
2000	1058	48.3591	132.082	-594342	19.7152	67.5589	3.529	59.21	0.302936	13.7433	1.77786	0.00579856	8.40541	0.40121	2.04219	4.96396	6.83337	0.223814	2.09019	30.2
2000	1057	48.1205	131.422	-591334	19.6227	67.2101	3.532	59.2362	0.304291	13.7109	1.7828	0.0058273	8.41984	0.403199	2.02225	4.94078	6.84855	0.224777	2.10055	30
2000	1056	47.8843	130.767	-588354	19.531	66.8646	3.534	59.2624	0.305647	13.6785	1.78774	0.00585605	8.43421	0.405189	2.00246	4.91773	6.86364	0.225739	2.11091	29.7
2000	1055	47.6502	130.119	-585403	19.4401	66.5225	3.537	59.2884	0.307002	13.646	1.79269	0.00588482	8.44853	0.407179	1.98282	4.89481	6.87865	0.226699	2.12128	29.5
2000	1054	47.4183	129.476	-582479	19.35	66.1837	3.54	59.3144	0.308358	13.6135	1.79764	0.00591359	8.46278	0.40917	1.96334	4.87202	6.89358	0.227659	2.13166	29.2
2000	1053	47.1886	128.84	-579583	19.2607	65.8481	3.542	59.3402	0.309715	13.581	1.80259	0.00594238	8.47697	0.411162	1.944	4.84935	6.90843	0.228617	2.14203	29
2000	1052	46.961	128.209	-576713	19.1723	65.5157	3.545	59.3659	0.311071	13.5484	1.80754	0.00597119	8.4911	0.413155	1.92482	4.82681	6.9232	0.229575	2.15242	28.8
2000	1051	46.7354	127.584	-573870	19.0846	65.1864	3.547	59.3915	0.312428	13.5158	1.8125	0.006	8.50516	0.415149	1.90578	4.8044	6.9379	0.230531	2.1628	28.5
2000	1050	46.5119	126.965	-571053	18.9977	64.8602	3.55	59.417	0.313785	13.4832	1.81746	0.00602883	8.51917	0.417144	1.88689	4.78211	6.95251	0.231486	2.1732	28.3
2000	1049	46.2905	126.351	-568262	18.9116	64.537	3.552	59.4424	0.315143	13.4505	1.82242	0.00605768	8.53311	0.419139	1.86814	4.75995	6.96705	0.23244	2.18359	28.1
2000	1048	46.071	125.742	-565497	18.8262	64.2168	3.555	59.4677	0.316501	13.4178	1.82739	0.00608653	8.547	0.421136	1.84953	4.73791	6.98151	0.233393	2.194	27.8
2000	1047	45.8535	125.139	-562756	18.7416	63.8996	3.557	59.4929	0.317859	13.3851	1.83236	0.00611541	8.56082	0.423134	1.83107	4.71599	6.9959	0.234345	2.2044	27.6
2000	1046	45.6379	124.542	-560040	18.6577	63.5853	3.559	59.518	0.319218	13.3523	1.83733	0.0061443	8.57459	0.425133	1.81275	4.69419	7.01021	0.235296	2.21482	27.4
2000	1045	45.4242	123.949	-557349	18.5745	63.2738	3.562	59.543	0.320577	13.3195	1.84231	0.0061732	8.58829	0.427133	1.79457	4.67251	7.02445	0.236246	2.22524	27.1
2000	1044	45.2124	123.362	-554681	18.492	62.9652	3.564	59.5679	0.321936	13.2867	1.84729	0.00620212	8.60193	0.429134	1.77653	4.65095	7.03861	0.237195	2.23566	26.9
2000	1043	45.0024	122.779	-552037	18.4103	62.6593	3.566	59.5927	0.323296	13.2538	1.85227	0.00623105	8.61551	0.431136	1.75862	4.62951	7.0527	0.238142	2.24609	26.7
2000	1042	44.7943	122.202	-549416	18.3292	62.3562	3.568	59.6174	0.324657	13.2209	1.85726	0.00626001	8.62903	0.433139	1.74085	4.60819	7.06671	0.239089	2.25653	26.4
2000	1041	44.588	121.63	-546818	18.2488	62.0558	3.571	59.642	0.326017	13.188	1.86225	0.00628897	8.64249	0.435143	1.72321	4.58699	7.08065	0.240035	2.26697	26.2
2000	1040	44.3834	121.062	-544243	18.1691	61.7581	3.573	59.6665	0.327379	13.155	1.86724	0.00631796	8.65588	0.437149	1.70571	4.5659	7.09452	0.24098	2.27742	26
2000	1039	44.1806	120.5	-541690	18.09	61.4629	3.575	59.6909	0.328741	13.1221	1.87224	0.00634696	8.66922	0.439156	1.68834	4.54492	7.10832	0.241923	2.28787	25.8
2000	1038	43.9795	119.942	-539159	18.0116	61.1704	3.577	59.7152	0.330103	13.0891	1.87724	0.00637598	8.68249	0.441164	1.67111	4.52406	7.12205	0.242866	2.29833	25.5
2000	1037	43.7801	119.389	-536650	17.9338	60.8804	3.579	59.7394	0.331466	13.056	1.88224	0.00640502	8.6957	0.443173	1.654	4.50331	7.13571	0.243808	2.3088	25.3
2000	1036	43.5824	118.84	-534162	17.8567	60.5929	3.581	59.7635	0.33283	13.023	1.88725	0.00643408	8.70885	0.445183	1.63702	4.48268	7.1493	0.244748	2.31928	25.1
2000	1035	43.3863	118.296	-531695	17.7802	60.3079	3.583	59.7875	0.334194	12.9899	1.89226	0.00646316	8.72194	0.447195	1.62017	4.46216	7.16282	0.245688	2.32976	24.9
2000	1034	43.1919	117.756	-529249	17.7043	60.0254	3.585	59.8114	0.335559	12.9568	1.89727	0.00649225	8.73497	0.449208	1.60345	4.44174	7.17627	0.246627	2.34024	24.6
2000	1033	42.9982	117.219	-526817	17.6288	59.744	3.587	59.8361	0.33685	12.9237	1.90217	0.00633711	8.74723	0.451232	1.5868	4.42142	7.18979	0.247569	2.35079	24.4
2000	1032	42.8055	116.685	-524401	17.5537	59.4643	3.589	59.8614	0.338087	12.8906	1.90699	0.00607721	8.75897	0.453263	1.57025	4.40119	7.20331	0.248514	2.36137	24.2
2000	1031	42.6143	116.155	-522005	17.4792	59.1869	3.591	59.8865	0.339315	12.8575	1.91181	0.00581833	8.77059	0.455296	1.55382	4.38107	7.21678	0.249458	2.37196	24
2000	1030	42.4247	115.629	-519628	17.4053	58.9117	3.594	59.9117	0.340536	12.8244	1.91662	0.00556054	8.78211	0.457332	1.53752	4.36105	7.23019	0.250402	2.38256	23.8
2000	1029	42.2366	115.107	-517271	17.332	58.6388	3.596	59.9368	0.341749	12.7913	1.92143	0.00530402	8.79353	0.459369	1.52134	4.34114	7.24354	0.251345	2.39318	23.6
2000	1028	42.0499	114.59	-514932	17.2593	58.3681	3.598	59.9618	0.342954	12.7581	1.92623	0.00504896	8.80484	0.461408	1.50529	4.32133	7.25682	0.252287	2.4038	23.3
2000	1027	41.8647	114.076	-512613	17.187	58.0996	3.6	59.9869	0.34415	12.725	1.93103	0.00479557	8.81604	0.46345	1.48935	4.30163	7.27005	0.253228	2.41444	23.1
2000	1026	41.6809	113.566	-510311	17.1154	57.8332	3.601	60.0119	0.345337	12.6918	1.93582	0.00454406	8.82713	0.465493	1.47354	4.28203	7.28323	0.254169	2.42508	22.9
2000	1025	41.4985	113.061	-508029	17.0443	57.569	3.603	60.0368	0.346513	12.6586	1.94061	0.00429471	8.8381	0.467539	1.45784	4.26253	7.29634	0.25511	2.43574	22.7
2000	1024	41.3175	112.559	-505764	16.9737	57.3068	3.605	60.0618	0.347679	12.6253	1.9454	0.00404777	8.84896	0.469587	1.44226	4.24313	7.3094	0.256049	2.44641	22.5
2000	1023	41.1379	112.061	-503516	16.9036	57.0468	3.607	60.0867	0.348833	12.5921	1.95017	0.00380354	8.85971	0.471637	1.4268	4.22384	7.32241	0.256988	2.45709	22.3
2000	1022	40.9596	111.566	-501287	16.8341	56.7887	3.609	60.1116	0.349975	12.5588	1.95494	0.00356234	8.87033	0.47369	1.41146	4.20464	7.33536	0.257927	2.46779	22.1
2000	1021	40.7826	111.075	-499074	16.7651	56.5326	3.611	60.1364	0.351105	12.5255	1.9597	0.00332452	8.88083	0.475746	1.39623	4.18555	7.34825	0.258865	2.4785	21.9
2000	1020	40.607	110.588	-496878	16.6965	56.2785	3.613	60.1613	0.35222	12.4922	1.96446	0.00309045	8.8912	0.477804	1.38111	4.16655	7.3611	0.259803	2.48922	21.7
2000	1019	40.4326	110.105	-494699	16.6285	56.0263	3.615	60.1861	0.353321	12.4588	1.96921	0.00286052	8.90144	0.479864	1.36612	4.14765	7.37389	0.26074	2.49995	21.5
2000	1018	40.2595	109.624	-492536	16.5609	55.7761	3.616	60.211	0.354407	12.4255	1.97394	0.00263517	8.91155	0.481928	1.35123	4.12884	7.38664	0.261677	2.5107	21.3
2000	1017	40.0876	109.148	-490390	16.4939	55.5277	3.618	60.2358	0.355476	12.3921	1.97867	0.00241485	8.92153	0.483994	1.33646	4.11014	7.39933	0.262613	2.52147	21.1
2000	1016	39.917	108.674	-488259	16.4273	55.2811	3.62	60.2607	0.356527	12.3587	1.98339	0.00220006	8.93137	0.486063	1.3218	4.09152	7.41197	0.263549	2.53225	20.9
2000	1015	39.7475	108.205	-486145	16.3611	55.0364	3.622	60.2855	0.357559	12.3253	1.9881	0.00199129	8.94106	0.488135	1.30725	4.073	7.42457	0.264485	2.54304	20.7
2000	1014	39.5793	107.738	-484045	16.2954	54.7934	3.623	60.3104	0.358572	12.2918	1.9928	0.00178911	8.9506	0.49021	1.29281	4.05458	7.43712	0.26542	2.55385	20.5
2000	1013	39.4122	107.275	-481962	16.2302	54.5523	3.625	60.3353	0.359564	12.2584	1.99748	0.00159409	8.96	0.492288	1.27848	4.03625	7.44963	0.266355	2.56468	20.3
2000	1012	39.2463	106.814	-479893	16.1655	54.3128	3.627	60.3602	0.360533	12.2249	2.00215	0.00140683	8.96924	0.494369	1.26426	4.01801	7.46209	0.26729	2.57552	20.1
2000	1011	39.0815	106.357	-477839	16.1011	54.0751	3.628	60.3852	0.361478	12.1914	2.00681	0.00122798	8.97831	0.496454	1.25015	3.99986	7.47451	0.268225	2.58638	19.9
2000	1010	38.9178	105.904	-475800	16.0372	53.839	3.63	60.4102	0.362397	12.1579	2.01146	0.0010582	8.98722	0.498542	1.23615	3.9818	7.48688	0.26916	2.59726	19.7
2000	1009	38.7552	105.453	-473775	15.9737	53.6046	3.631	60.4352	0.363288	12.1244	2.01608	0.000898194	8.99596	0.500634	1.22225	3.96383	7.49921	0.270094	2.60816	19.5
2000	1008	38.5936	105.005	-471764	15.9107	53.3718	3.633	60.4603	0.36415	12.0908	2.02069	0.000748682	9.00452	0.502729	1.20847	3.94596	7.51151	0.271028	2.61907	19.3
2000	1007	38.4332	104.56	-469767	15.848	53.1406	3.635	60.4855	0.364979	12.0572	2.02528	0.000610418	9.01288	0.504829	1.19478	3.92817	7.52376	0.271963	2.63001	19.1
2000	1006	38.2737	104.118	-467784	15.7858	52.911	3.636	60.5107	0.365773	12.0237	2.02985	0.000484178	9.02105	0.506932	1.18121	3.91046	7.53598	0.272897	2.64097	18.9
2000	1005	38.1152	103.678	-465815	15.7239	52.6829	3.638	60.5361	0.366528	11.9901	2.0344	0.000370761	9.02899	0.509039	1.16774	3.89285	7.54817	0.273832	2.65195	18.7
2000	1004	37.9577	103.242	-463858	15.6625	52.4562	3.639	60.5615	0.367239	11.9564	2.03892	0.000270982	9.0367	0.511152	1.15438	3.87532	7.56033	0.274767	2.66295	18.5
2000	1003	37.8012	102.808	-461914	15.6014	52.2309	3.641	60.5872	0.367896	11.9228	2.0434	0.000185666	9.04414	0.513269	1.14112	3.85787	7.57246	0.275703	2.67398	18.4
2000	1002	37.6454	102.376	-459983	15.5406	52.007	3.642	60.613	0.368488	11.8891	2.04785	0.00011564	9.05125	0.515392	1.12797	3.8405	7.58458	0.27664	2.68504	18.2
2000	1001	37.4904	101.947	-458062	15.4802	51.7842	3.644	60.6393	0.368988	11.8555	2.05222	6.17058e-05	9.05791	0.517523	1.11492	3.82322	7.5967	0.277578	2.69615	18
2000	1000	37.3358	101.519	-456150	15.42	51.5621	3.646	60.6662	0.369329	11.8218	2.05648	2.4593e-05	9.06382	0.519667	1.10199	3.806	7.60887	0.278521	2.70731	17.8
2000	999	37.1884	101.108	-454297	15.3619	51.3497	3.647	60.686	0.370971	11.7881	2.06181	0	9.07571	0.521727	1.08909	3.78904	7.62009	0.279421	2.71804	17.6
2000	998	37.0189	100.645	-452286	15.298	51.1082	3.65	60.7326	0.367599	11.7543	2.06309	0	9.0646	0.524115	1.07653	3.77156	7.63464	0.280479	2.73049	17.5
2000	997	36.8348	100.147	-450173	15.2304	50.8475	3.654	60.7978	0.360787	11.7206	2.06149	0	9.03735	0.526735	1.06427	3.75377	7.65148	0.281649	2.74413	17.4
2000	996	36.6525	99.6536	-448080	15.1634	50.5894	3.659	60.8627	0.354067	11.6868	2.05989	0	9.01012	0.529354	1.05214	3.7361	7.66822	0.282816	2.75778	17.2
2000	995	36.472	99.165	-446007	15.0971	50.3338	3.663	60.9275	0.347438	11.6529	2.05827	0	8.9829	0.531974	1.04013	3.71855	7.68488	0.283981	2.77143	17.1
2000	994	36.2933	98.681	-443955	15.0313	50.0808	3.667	60.992	0.3409	11.6191	2.05665	0	8.9557	0.534594	1.02825	3.70111	7.70143	0.285144	2.78508	17
2000	993	36.1162	98.2016	-441922	14.9662	49.8302	3.672	61.0564	0.334451	11.5852	2.05501	0	8.92852	0.537214	1.0165	3.68379	7.7179	0.286305	2.79873	16.9
2000	992	35.9409	97.7267	-439908	14.9017	49.5821	3.676	61.1205	0.32809	11.5513	2.05337	0	8.90135	0.539835	1.00486	3.66658	7.73428	0.287464	2.81238	16.8
2000	991	35.7672	97.2563	-437914	14.8377	49.3364	3.68	61.1845	0.321817	11.5173	2.05171	0	8.87419	0.542457	0.993348	3.64948	7.75056	0.28862	2.82604	16.6
2000	990	35.5952	96.7902	-435938	14.7744	49.0931	3.684	61.2482	0.315629	11.4833	2.05004	0	8.84704	0.545078	0.981953	3.63249	7.76676	0.289775	2.8397	16.5
2000	989	35.4247	96.3285	-433980	14.7116	48.8521	3.688	61.3117	0.309527	11.4493	2.04836	0	8.8199	0.547701	0.970676	3.61562	7.78287	0.290927	2.85336	16.4
2000	988	35.2559	95.8709	-432041	14.6493	48.6134	3.692	61.3751	0.303508	11.4153	2.04666	0	8.79276	0.550324	0.959515	3.59885	7.79889	0.292078	2.86703	16.3
2000	987	35.0886	95.4176	-430119	14.5876	48.3769	3.697	61.4382	0.297573	11.3813	2.04495	0	8.76563	0.552947	0.94847	3.58219	7.81483	0.293226	2.88069	16.2
2000	986	34.9229	94.9683	-428215	14.5265	48.1427	3.7	61.5012	0.29172	11.3472	2.04323	0	8.73849	0.555571	0.937538	3.56563	7.83068	0.294372	2.89436	16.1
2000	985	34.7587	94.5232	-426329	14.4659	47.9106	3.704	61.564	0.285949	11.3131	2.04149	0	8.71136	0.558196	0.926719	3.54918	7.84645	0.295516	2.90804	15.9
2000	984	34.596	94.082	-424460	14.4058	47.6807	3.708	61.6267	0.280257	11.2789	2.03974	0	8.68423	0.560822	0.916011	3.53284	7.86213	0.296659	2.92172	15.8
2000	983	34.4347	93.6447	-422607	14.3462	47.4529	3.712	61.6891	0.274646	11.2448	2.03797	0	8.65709	0.563448	0.905414	3.51659	7.87773	0.297799	2.9354	15.7
2000	982	34.2749	93.2113	-420771	14.2872	47.2272	3.716	61.7514	0.269113	11.2106	2.03619	0	8.62995	0.566075	0.894925	3.50045	7.89325	0.298937	2.94908	15.6
2000	981	34.1165	92.7817	-418952	14.2286	47.0036	3.72	61.8135	0.263658	11.1764	2.03439	0	8.6028	0.568703	0.884543	3.48441	7.90869	0.300074	2.96277	15.5
2000	980	33.9596	92.3559	-417148	14.1705	46.782	3.724	61.8755	0.258279	11.1422	2.03257	0	8.57564	0.571331	0.874268	3.46847	7.92406	0.301208	2.97647	15.4
2000	979	33.804	91.9338	-415361	14.113	46.5624	3.727	61.9373	0.252977	11.108	2.03074	0	8.54848	0.573961	0.864098	3.45263	7.93934	0.30234	2.99017	15.3
2000	978	33.6498	91.5154	-413589	14.0559	46.3448	3.731	61.999	0.24775	11.0737	2.02889	0	8.52129	0.576591	0.854033	3.43689	7.95454	0.303471	3.00387	15.2
2000	977	33.4969	91.1005	-411833	13.9993	46.1291	3.734	62.0605	0.242598	11.0394	2.02703	0	8.4941	0.579222	0.84407	3.42124	7.96967	0.3046	3.01758	15
2000	976	33.3454	90.6892	-410092	13.9432	45.9153	3.738	62.1218	0.23752	11.0051	2.02514	0	8.46688	0.581854	0.834209	3.40569	7.98472	0.305726	3.03129	14.9
2000	975	33.1952	90.2814	-408366	13.8875	45.7034	3.742	62.183	0.232514	10.9708	2.02324	0	8.43965	0.584487	0.82445	3.39023	7.9997	0.306851	3.04501	14.8
2000	974	33.0462	89.8771	-406655	13.8323	45.4933	3.745	62.2441	0.227581	10.9365	2.02132	0	8.4124	0.587122	0.814789	3.37487	8.0146	0.307974	3.05873	14.7
2000	973	32.8986	89.4762	-404958	13.7775	45.2851	3.748	62.305	0.222719	10.9022	2.01938	0	8.38513	0.589757	0.805228	3.3596	8.02942	0.309095	3.07246	14.6
2000	972	32.7522	89.0786	-403276	13.7232	45.0787	3.752	62.3658	0.217928	10.8678	2.01742	0	8.35783	0.592393	0.795765	3.34442	8.04418	0.310214	3.08619	14.5
2000	971	32.607	88.6844	-401609	13.6693	44.8741	3.755	62.4265	0.213207	10.8335	2.01543	0	8.33051	0.59503	0.786398	3.32933	8.05886	0.311331	3.09993	14.4
2000	970	32.4631	88.2934	-399955	13.6159	44.6713	3.759	62.487	0.208556	10.7991	2.01343	0	8.30316	0.597669	0.777127	3.31433	8.07347	0.312447	3.11368	14.3
2000	969	32.3203	87.9056	-398315	13.5629	44.4701	3.762	62.5474	0.203973	10.7647	2.01141	0	8.27578	0.600308	0.767951	3.29942	8.08801	0.31356	3.12743	14.2
2000	968	32.1788	87.5211	-396689	13.5103	44.2707	3.765	62.6077	0.199457	10.7303	2.00936	0	8.24836	0.602949	0.758868	3.2846	8.10249	0.314672	3.14119	14.1
2000	967	32.0384	87.1396	-395077	13.4581	44.073	3.768	62.6679	0.19501	10.6959	2.00729	0	8.22092	0.605591	0.749879	3.26987	8.11689	0.315782	3.15495	14
2000	966	31.8992	86.7613	-393478	13.4063	43.8769	3.771	62.728	0.190629	10.6615	2.0052	0	8.19344	0.608234	0.740982	3.25522	8.13122	0.31689	3.16872	13.9
2000	965	31.7611	86.386	-391892	13.355	43.6825	3.775	62.7879	0.186313	10.6271	2.00308	0	8.16592	0.610878	0.732176	3.24066	8.14549	0.317997	3.1825	13.8
2000	964	31.6241	86.0138	-390319	13.304	43.4896	3.778	62.8477	0.182064	10.5927	2.00094	0	8.13837	0.613524	0.723461	3.22618	8.15969	0.319101	3.19628	13.7
2000	963	31.4883	85.6445	-388759	13.2535	43.2984	3.781	62.9075	0.177878	10.5582	1.99878	0	8.11077	0.616171	0.714834	3.21179	8.17382	0.320204	3.21007	13.6
2000	962	31.3535	85.2781	-387211	13.2033	43.1087	3.784	62.9671	0.173757	10.5238	1.99659	0	8.08313	0.618819	0.706297	3.19748	8.18789	0.321305	3.22387	13.5
2000	961	31.2198	84.9147	-385676	13.1535	42.9206	3.787	63.0266	0.1697	10.4893	1.99438	0	8.05544	0.621469	0.697847	3.18325	8.20189	0.322405	3.23767	13.4
2000	960	31.0872	84.5541	-384154	13.1041	42.7341	3.79	63.0861	0.165705	10.4549	1.99213	0	8.02771	0.62412	0.689485	3.1691	8.21583	0.323502	3.25148	13.3
2000	959	30.9557	84.1963	-382643	13.0551	42.549	3.793	63.1454	0.161773	10.4204	1.98987	0	7.99993	0.626773	0.681209	3.15503	8.22971	0.324598	3.2653	13.2
2000	958	30.8251	83.8413	-381145	13.0064	42.3654	3.796	63.2047	0.157902	10.3859	1.98757	0	7.97209	0.629426	0.673018	3.14104	8.24352	0.325692	3.27913	13.1
2000	957	30.6957	83.4891	-379659	12.9581	42.1834	3.798	63.2638	0.154093	10.3515	1.98525	0	7.94421	0.632082	0.664912	3.12713	8.25728	0.326784	3.29296	13
2000	956	30.5672	83.1396	-378184	12.9102	42.0027	3.801	63.3229	0.150344	10.317	1.98289	0	7.91627	0.634738	0.65689	3.1133	8.27097	0.327875	3.3068	12.9
2000	955	30.4397	82.7928	-376721	12.8627	41.8235	3.804	63.3819	0.146655	10.2825	1.98051	0	7.88827	0.637397	0.648952	3.09955	8.2846	0.328964	3.32065	12.8
2000	954	30.3132	82.4486	-375270	12.8155	41.6457	3.807	63.4409	0.143026	10.248	1.9781	0	7.86021	0.640056	0.641096	3.08587	8.29817	0.330051	3.33451	12.7
2000	953	30.1877	82.1071	-373830	12.7686	41.4693	3.81	63.4997	0.139456	10.2136	1.97566	0	7.83209	0.642718	0.633322	3.07226	8.31169	0.331137	3.34837	12.6
2000	952	30.0631	81.7681	-372401	12.7221	41.2943	3.812	63.5585	0.135944	10.1791	1.97318	0	7.80391	0.645381	0.625629	3.05873	8.32514	0.332221	3.36224	12.5
2000	951	29.9395	81.4317	-370983	12.6759	41.1207	3.815	63.6173	0.13249	10.1446	1.97068	0	7.77566	0.648045	0.618017	3.04528	8.33854	0.333303	3.37613	12.4
2000	950	29.8168	81.0978	-369577	12.6301	40.9484	3.818	63.6759	0.129093	10.1101	1.96814	0	7.74734	0.650711	0.610484	3.0319	8.35188	0.334384	3.39002	12.3
2000	949	29.6951	80.7664	-368181	12.5846	40.7774	3.82	63.7345	0.125753	10.0757	1.96556	0	7.71895	0.653379	0.603031	3.01858	8.36516	0.335462	3.40391	12.2
2000	948	29.5064	80.274	-366108	12.5173	40.5137	3.827	63.8385	0.125793	10.0428	1.95545	0	7.64956	0.647666	0.576693	3.01014	8.39052	0.337211	3.42568	11.8
2000	947	29.3771	79.9248	-364654	12.4697	40.333	3.83	63.908	0.123321	10.0061	1.95109	0	7.61192	0.647184	0.568352	3.00054	8.40438	0.338369	3.44076	11.7
2000	946	29.2489	79.5784	-363212	12.4224	40.1537	3.834	63.9774	0.120891	9.96933	1.9467	0	7.57429	0.646691	0.560103	2.99101	8.4182	0.339525	3.45584	11.6
2000	945	29.1217	79.2348	-361782	12.3755	39.9759	3.837	64.0467	0.118503	9.93259	1.94229	0	7.53666	0.646188	0.551946	2.98153	8.43196	0.34068	3.47094	11.5
2000	944	28.9955	78.8939	-360363	12.329	39.7996	3.84	64.1159	0.116156	9.89587	1.93784	0	7.49906	0.645674	0.54388	2.97211	8.44568	0.341834	3.48605	11.4
2000	943	28.8703	78.5557	-358955	12.2828	39.6247	3.844	64.1849	0.113849	9.85916	1.93336	0	7.46146	0.64515	0.535904	2.96275	8.45935	0.342986	3.50116	11.3
2000	942	28.7461	78.2201	-357559	12.237	39.4513	3.847	64.2537	0.111583	9.82245	1.92885	0	7.42389	0.644617	0.528017	2.95345	8.47298	0.344136	3.51629	11.3
2000	941	28.6229	77.8873	-356173	12.1915	39.2792	3.85	64.3225	0.109356	9.78576	1.92431	0	7.38633	0.644073	0.52022	2.94421	8.48655	0.345285	3.53142	11.2
2000	940	28.5007	77.557	-354799	12.1464	39.1086	3.854	64.3911	0.107167	9.74909	1.91974	0	7.34879	0.64352	0.51251	2.93502	8.50008	0.346433	3.54656	11.1
2000	939	28.3795	77.2293	-353436	12.1016	38.9394	3.857	64.4595	0.105017	9.71242	1.91514	0	7.31128	0.642957	0.504889	2.92589	8.51356	0.347578	3.56171	11
2000	938	28.2592	76.9043	-352083	12.0571	38.7715	3.86	64.5279	0.102905	9.67577	1.91051	0	7.27379	0.642385	0.497354	2.91682	8.527	0.348722	3.57687	10.9
2000	937	28.1399	76.5817	-350741	12.013	38.605	3.863	64.5961	0.10083	9.63912	1.90585	0	7.23632	0.641803	0.489906	2.90781	8.54038	0.349865	3.59204	10.8
2000	936	28.0215	76.2617	-349409	11.9692	38.4398	3.866	64.6641	0.0987921	9.60249	1.90117	0	7.19888	0.641213	0.482543	2.89885	8.55372	0.351006	3.60721	10.7
2000	935	27.9041	75.9441	-348088	11.9257	38.2759	3.869	64.732	0.0967901	9.56587	1.89645	0	7.16146	0.640614	0.475266	2.88995	8.56702	0.352145	3.62239	10.6
2000	934	27.7876	75.6291	-346778	11.8826	38.1134	3.872	64.7998	0.0948238	9.52927	1.89171	0	7.12408	0.640006	0.468073	2.88111	8.58026	0.353282	3.63758	10.5
2000	933	27.672	75.3165	-345477	11.8398	37.9521	3.875	64.8674	0.0928926	9.49267	1.88693	0	7.08673	0.63939	0.460964	2.87232	8.59346	0.354418	3.65278	10.4
2000	932	27.5573	75.0063	-344187	11.7973	37.7922	3.878	64.9349	0.0909961	9.45609	1.88213	0	7.04941	0.638765	0.453938	2.86358	8.60661	0.355552	3.66798	10.3
2000	931	27.4435	74.6985	-342907	11.7551	37.6335	3.881	65.0023	0.0891338	9.41952	1.87731	0	7.01213	0.638132	0.446995	2.85491	8.61971	0.356684	3.68319	10.2
2000	930	27.3306	74.393	-341636	11.7132	37.4761	3.883	65.0695	0.0873051	9.38296	1.87245	0	6.97488	0.637491	0.440133	2.84629	8.63277	0.357815	3.6984	10.1
2000	929	27.2186	74.0899	-340376	11.6716	37.32	3.886	65.1366	0.0855096	9.34642	1.86757	0	6.93767	0.636843	0.433353	2.83772	8.64577	0.358943	3.71362	10
2000	928	27.1075	73.7892	-339125	11.6304	37.1651	3.889	65.2035	0.0837467	9.30989	1.86266	0	6.9005	0.636186	0.426654	2.82921	8.65873	0.36007	3.72884	9.9
2000	927	26.9972	73.4907	-337884	11.5894	37.0114	3.892	65.2703	0.0820161	9.27337	1.85772	0	6.86338	0.635522	0.420035	2.82075	8.67164	0.361195	3.74407	9.8
2000	926	26.8878	73.1946	-336653	11.5488	36.8589	3.894	65.3369	0.0803171	9.23686	1.85276	0	6.82629	0.634851	0.413495	2.81235	8.68451	0.362318	3.75931	9.7
2000	925	26.7792	72.9006	-335431	11.5084	36.7076	3.897	65.4034	0.0786494	9.20037	1.84777	0	6.78925	0.634173	0.407034	2.804	8.69732	0.363439	3.77455	9.7
2000	924	26.6715	72.609	-334218	11.4684	36.5576	3.899	65.4698	0.0770125	9.1639	1.84276	0	6.75226	0.633487	0.400652	2.79571	8.71009	0.364558	3.78979	9.6
2000	923	26.5646	72.3195	-333015	11.4286	36.4087	3.902	65.536	0.0754059	9.12743	1.83772	0	6.71531	0.632795	0.394346	2.78747	8.72281	0.365676	3.80504	9.5
2000	922	26.4586	72.0323	-331821	11.3892	36.261	3.904	65.6021	0.0738292	9.09098	1.83265	0	6.67842	0.632096	0.388118	2.77928	8.73548	0.366791	3.82029	9.4
2000	921	26.3533	71.7472	-330636	11.35	36.1144	3.907	65.668	0.0722819	9.05455	1.82756	0	6.64157	0.63139	0.381966	2.77115	8.74811	0.367904	3.83555	9.3
2000	920	26.2489	71.4643	-329460	11.3111	35.969	3.909	65.7337	0.0707635	9.01813	1.82245	0	6.60478	0.630678	0.37589	2.76307	8.76068	0.369015	3.85081	9.2
2000	919	26.1453	71.1835	-328293	11.2725	35.8247	3.911	65.7994	0.0692737	8.98172	1.81731	0	6.56804	0.629959	0.369889	2.75504	8.77321	0.370124	3.86607	9.1
2000	918	26.0425	70.9048	-327134	11.2342	35.6815	3.914	65.8648	0.067812	8.94533	1.81215	0	6.53136	0.629235	0.363962	2.74707	8.78569	0.371232	3.88134	9
2000	917	25.9404	70.6282	-325985	11.1961	35.5395	3.916	65.9301	0.0663779	8.90896	1.80696	0	6.49474	0.628504	0.358109	2.73915	8.79812	0.372337	3.8966	8.9
2000	916	25.8392	70.3537	-324844	11.1583	35.3985	3.918	65.9953	0.064971	8.8726	1.80175	0	6.45817	0.627768	0.352329	2.73128	8.81051	0.373439	3.91187	8.9
2000	915	25.7387	70.0813	-323712	11.1208	35.2587	3.92	66.0603	0.063591	8.83626	1.79652	0	6.42167	0.627026	0.346621	2.72346	8.82284	0.37454	3.92714	8.8
2000	914	25.639	69.8109	-322589	11.0836	35.1199	3.923	66.1252	0.0622373	8.79993	1.79126	0	6.38523	0.626278	0.340986	2.7157	8.83513	0.375639	3.94242	8.7
2000	913	25.54	69.5425	-321474	11.0466	34.9822	3.925	66.1899	0.0609097	8.76362	1.78599	0	6.34885	0.625526	0.335422	2.70799	8.84736	0.376735	3.95769	8.6
2000	912	25.4418	69.2761	-320367	11.0099	34.8456	3.927	66.2545	0.0596076	8.72733	1.78069	0	6.31254	0.624767	0.329928	2.70033	8.85955	0.377829	3.97297	8.5
2000	911	25.3444	69.0117	-319268	10.9735	34.71	3.929	66.3189	0.0583306	8.69105	1.77537	0	6.2763	0.624004	0.324505	2.69272	8.87169	0.378921	3.98824	8.4
2000	910	25.2477	68.7492	-318178	10.9373	34.5755	3.931	66.3831	0.0570785	8.65479	1.77003	0	6.24012	0.623235	0.319151	2.68516	8.88379	0.380011	4.00352	8.4
2000	909	25.1517	68.4887	-317096	10.9014	34.442	3.933	66.4472	0.0558507	8.61855	1.76466	0	6.20402	0.622462	0.313865	2.67766	8.89583	0.381098	4.01879	8.3
2000	908	25.0565	68.2302	-316022	10.8657	34.3095	3.935	66.5112	0.0546469	8.58233	1.75928	0	6.16798	0.621684	0.308648	2.6702	8.90783	0.382183	4.03407	8.2
2000	907	24.962	67.9735	-314956	10.8303	34.1781	3.937	66.5749	0.0534667	8.54612	1.75388	0	6.13202	0.620902	0.303499	2.6628	8.91977	0.383266	4.04934	8.1
2000	906	24.8682	67.7188	-313898	10.7951	34.0476	3.938	66.6386	0.0523097	8.50994	1.74846	0	6.09614	0.620115	0.298416	2.65544	8.93167	0.384346	4.06462	8
2000	905	24.7751	67.4659	-312848	10.7602	33.9182	3.94	66.702	0.0511755	8.47377	1.74301	0	6.06033	0.619323	0.2934	2.64814	8.94352	0.385424	4.07989	7.9
2000	904	24.6827	67.2149	-311806	10.7256	33.7897	3.942	66.7653	0.0500639	8.43763	1.73755	0	6.0246	0.618528	0.288449	2.64088	8.95532	0.386499	4.09516	7.9
2000	903	24.591	66.9657	-310772	10.6912	33.6622	3.944	66.8285	0.0489743	8.4015	1.73207	0	5.98895	0.617728	0.283564	2.63368	8.96707	0.387572	4.11043	7.8
2000	902	24.5	66.7184	-309745	10.657	33.5357	3.945	66.8915	0.0479065	8.36539	1.72657	0	5.95337	0.616924	0.278743	2.62653	8.97877	0.388643	4.1257	7.7
2000	901	24.4097	66.4728	-308725	10.6231	33.4102	3.947	66.9543	0.0468601	8.32931	1.72106	0	5.91789	0.616116	0.273986	2.61942	8.99042	0.389711	4.14096	7.6
2000	900	24.3201	66.2291	-307714	10.5894	33.2856	3.949	67.0169	0.0458348	8.29325	1.71552	0	5.88248	0.615305	0.269292	2.61237	9.00202	0.390776	4.15622	7.5
orthopyroxene_0	thermodynamic	data	and	composition:
Pressure	Temperature	mass	S	H	V	Cp	structure	formula	SiO2	TiO2	Al2O3	Fe2O3	Cr2O3	FeO	MnO	MgO	CaO	Na2O	K2O	H2O	Mg#
2000	1163	0.253594	0.608875	-3211.28	0.078352	0.319381	opx	Na0.00Ca0.08Fe''0.33Mg1.53Fe'''0.02Ti0.00Al0.10Si1.94O6	54.8778	0.0158251	2.29841	0.593527	0	10.9805	0	29.0131	2.19396	0.0269737	0	0	82.2581
2000	1162	0.122949	0.295068	-1556.53	0.03798	0.154797	opx	Na0.00Ca0.08Fe''0.33Mg1.53Fe'''0.02Ti0.00Al0.10Si1.94O6	54.8637	0.01582	2.30105	0.593802	0	11.0161	0	28.97	2.21236	0.0271139	0	0
2000	1161	0.31723	0.76094	-4013.97	0.097968	0.399237	opx	Na0.00Ca0.08Fe''0.33Mg1.53Fe'''0.02Ti0.00Al0.10Si1.94O6	54.8514	0.0158625	2.2877	0.59355	0	11.0839	0	28.912	2.22835	0.027218	0	0
2000	1160	0.299413	0.717842	-3786.57	0.09244	0.37666	opx	Na0.00Ca0.09Fe''0.33Mg1.53Fe'''0.02Ti0.00Al0.10Si1.95O6	54.8389	0.015901	2.27541	0.593327	0	11.1497	0	28.8549	2.24457	0.0273239	0	0
2000	1159	0.293698	0.703787	-3712.38	0.090651	0.369319	opx	Na0.00Ca0.09Fe''0.33Mg1.52Fe'''0.02Ti0.00Al0.09Si1.95O6	54.8264	0.0159384	2.26324	0.5931	0	11.2155	0	28.7975	2.26087	0.0274295	0	0
2000	1158	0.288139	0.690121	-3640.25	0.088911	0.362181	opx	Na0.00Ca0.09Fe''0.33Mg1.52Fe'''0.02Ti0.00Al0.09Si1.95O6	54.8138	0.0159748	2.25116	0.59287	0	11.2813	0	28.7401	2.27723	0.0275347	0	0
2000	1157	0.151502	0.362682	-1912.96	0.046734	0.190358	opx	Na0.00Ca0.09Fe''0.34Mg1.52Fe'''0.02Ti0.00Al0.09Si1.95O6	54.7953	0.0161338	2.24864	0.594612	0	11.3538	0	28.6878	2.27601	0.0276222	0	0
2000	1156	0.165694	0.396461	-2091.01	0.051096	0.208109	opx	Na0.00Ca0.09Fe''0.34Mg1.52Fe'''0.02Ti0.00Al0.09Si1.95O6	54.7776	0.016276	2.24489	0.596089	0	11.4256	0	28.6348	2.27706	0.0277115	0	0
2000	1155	0.162531	0.388702	-2049.97	0.050105	0.204057	opx	Na0.00Ca0.09Fe''0.34Mg1.51Fe'''0.02Ti0.00Al0.09Si1.95O6	54.7599	0.0164175	2.24117	0.597563	0	11.4975	0	28.5816	2.27807	0.0278003	0	0
2000	1154	0.159464	0.381178	-2010.18	0.049145	0.200128	opx	Na0.00Ca0.09Fe''0.34Mg1.51Fe'''0.02Ti0.00Al0.09Si1.95O6	54.742	0.0165585	2.23747	0.599033	0	11.5696	0	28.5284	2.27904	0.0278885	0	0
clinopyroxene_1	thermodynamic	data	and	composition:
Pressure	Temperature	mass	S	H	V	Cp	structure	formula	SiO2	TiO2	Al2O3	Fe2O3	Cr2O3	FeO	MnO	MgO	CaO	Na2O	K2O	H2O
2000	1153	0.250745	0.596372	-3117.17	0.07716	0.30746	cpx	Na0.01Ca0.27Fe''0.36Mg1.28Fe'''0.02Ti0.00Al0.13Si1.92O6	53.2053	0.0303412	3.14818	0.883711	0	11.9032	0	23.7818	6.95125	0.0961769	0	0
2000	1152	0.254944	0.606073	-3167.84	0.078429	0.312495	cpx	Na0.01Ca0.27Fe''0.36Mg1.28Fe'''0.02Ti0.00Al0.13Si1.92O6	53.1885	0.030728	3.14636	0.887084	0	11.9654	0	23.7368	6.94853	0.0965447	0	0
2000	1151	0.250217	0.594557	-3107.61	0.076953	0.30659	cpx	Na0.01Ca0.27Fe''0.36Mg1.28Fe'''0.02Ti0.00Al0.13Si1.92O6	53.1717	0.0311161	3.14453	0.890454	0	12.0277	0	23.6919	6.94564	0.0969107	0	0
2000	1150	0.245622	0.583362	-3049.06	0.075518	0.30085	cpx	Na0.01Ca0.27Fe''0.37Mg1.28Fe'''0.02Ti0.00Al0.13Si1.92O6	53.1549	0.0315053	3.14269	0.893821	0	12.0901	0	23.6471	6.94258	0.0972748	0	0
2000	1149	0.241152	0.572476	-2992.12	0.074123	0.295268	cpx	Na0.01Ca0.27Fe''0.37Mg1.27Fe'''0.02Ti0.00Al0.13Si1.92O6	53.1381	0.0318958	3.14085	0.897185	0	12.1527	0	23.6023	6.93937	0.097637	0	0
2000	1148	0.236804	0.561888	-2936.73	0.072765	0.289838	cpx	Na0.01Ca0.27Fe''0.37Mg1.27Fe'''0.02Ti0.00Al0.13Si1.92O6	53.1213	0.0322875	3.139	0.900546	0	12.2154	0	23.5575	6.93599	0.0979975	0	0
2000	1147	0.232572	0.551586	-2882.84	0.071444	0.284555	cpx	Na0.01Ca0.27Fe''0.37Mg1.27Fe'''0.02Ti0.00Al0.13Si1.92O6	53.1044	0.0326803	3.13715	0.903906	0	12.2783	0	23.5127	6.93245	0.0983561	0	0
2000	1146	0.228452	0.54156	-2830.39	0.070159	0.279413	cpx	Na0.01Ca0.27Fe''0.37Mg1.27Fe'''0.02Ti0.00Al0.13Si1.92O6	53.0876	0.0330743	3.13529	0.907263	0	12.3413	0	23.468	6.92875	0.0987129	0	0
2000	1145	0.224441	0.531799	-2779.33	0.068907	0.274407	cpx	Na0.01Ca0.27Fe''0.38Mg1.27Fe'''0.02Ti0.00Al0.13Si1.92O6	53.0708	0.0334695	3.13342	0.910619	0	12.4044	0	23.4233	6.9249	0.0990679	0	0
2000	1144	0.220534	0.522295	-2729.61	0.067688	0.269532	cpx	Na0.01Ca0.27Fe''0.38Mg1.26Fe'''0.02Ti0.00Al0.13Si1.92O6	53.0539	0.0338657	3.13154	0.913973	0	12.4677	0	23.3787	6.92089	0.099421	0	0
2000	1143	0.216729	0.513039	-2681.18	0.066501	0.264784	cpx	Na0.01Ca0.27Fe''0.38Mg1.26Fe'''0.03Ti0.00Al0.13Si1.92O6	53.037	0.0342631	3.12966	0.917326	0	12.5312	0	23.334	6.91672	0.0997723	0	0
2000	1142	0.21302	0.504021	-2634	0.065344	0.260158	cpx	Na0.01Ca0.27Fe''0.38Mg1.26Fe'''0.03Ti0.00Al0.13Si1.92O6	53.0201	0.0346616	3.12777	0.920678	0	12.5949	0	23.2894	6.9124	0.100122	0	0
2000	1141	0.209405	0.495233	-2588.01	0.064216	0.25565	cpx	Na0.01Ca0.27Fe''0.38Mg1.26Fe'''0.03Ti0.00Al0.13Si1.92O6	53.0032	0.0350611	3.12588	0.924029	0	12.6587	0	23.2448	6.90792	0.10047	0	0
2000	1140	0.205881	0.486668	-2543.19	0.063117	0.251256	cpx	Na0.01Ca0.27Fe''0.39Mg1.26Fe'''0.03Ti0.00Al0.13Si1.92O6	52.9863	0.0354617	3.12398	0.92738	0	12.7226	0	23.2002	6.90329	0.100816	0	0
2000	1139	0.202445	0.478317	-2499.49	0.062045	0.246972	cpx	Na0.01Ca0.27Fe''0.39Mg1.25Fe'''0.03Ti0.00Al0.13Si1.92O6	52.9693	0.0358634	3.12207	0.93073	0	12.7867	0	23.1556	6.89851	0.10116	0	0
2000	1138	0.199093	0.470173	-2456.87	0.061	0.242793	cpx	Na0.01Ca0.27Fe''0.39Mg1.25Fe'''0.03Ti0.00Al0.13Si1.92O6	52.9524	0.0362661	3.12016	0.934081	0	12.8511	0	23.111	6.89358	0.101502	0	0
2000	1137	0.195823	0.46223	-2415.3	0.059981	0.238718	cpx	Na0.01Ca0.27Fe''0.39Mg1.25Fe'''0.03Ti0.00Al0.13Si1.92O6	52.9354	0.0366698	3.11824	0.937432	0	12.9155	0	23.0664	6.8885	0.101842	0	0
2000	1136	0.192632	0.454481	-2374.74	0.058986	0.234742	cpx	Na0.01Ca0.27Fe''0.39Mg1.25Fe'''0.03Ti0.00Al0.13Si1.92O6	52.9184	0.0370746	3.11631	0.940783	0	12.9802	0	23.0218	6.88327	0.102181	0	0
2000	1135	0.189517	0.446919	-2335.16	0.058015	0.230861	cpx	Na0.01Ca0.27Fe''0.40Mg1.25Fe'''0.03Ti0.00Al0.13Si1.92O6	52.9014	0.0374803	3.11438	0.944135	0	13.045	0	22.9772	6.8779	0.102518	0	0
2000	1134	0.186477	0.439539	-2296.53	0.057068	0.227073	cpx	Na0.01Ca0.27Fe''0.40Mg1.24Fe'''0.03Ti0.00Al0.13Si1.92O6	52.8843	0.037887	3.11244	0.947488	0	13.1101	0	22.9326	6.87237	0.102853	0	0
2000	1133	0.183507	0.432334	-2258.81	0.056143	0.223376	cpx	Na0.01Ca0.27Fe''0.40Mg1.24Fe'''0.03Ti0.00Al0.13Si1.92O6	52.8673	0.0382946	3.1105	0.950843	0	13.1753	0	22.8879	6.86671	0.103187	0	0
2000	1132	0.180608	0.425298	-2221.98	0.055239	0.219765	cpx	Na0.01Ca0.27Fe''0.40Mg1.24Fe'''0.03Ti0.00Al0.13Si1.92O6	52.8502	0.0387032	3.10855	0.954199	0	13.2407	0	22.8433	6.8609	0.103518	0	0
2000	1131	0.177775	0.418427	-2186	0.054356	0.216238	cpx	Na0.01Ca0.27Fe''0.40Mg1.24Fe'''0.03Ti0.00Al0.13Si1.92O6	52.833	0.0391128	3.10659	0.957556	0	13.3063	0	22.7987	6.85494	0.103848	0	0
2000	1130	0.175007	0.411715	-2150.86	0.053494	0.212792	cpx	Na0.01Ca0.27Fe''0.41Mg1.23Fe'''0.03Ti0.00Al0.13Si1.92O6	52.8159	0.0395232	3.10463	0.960916	0	13.3721	0	22.754	6.84885	0.104176	0	0
2000	1129	0.172302	0.405157	-2116.52	0.052652	0.209426	cpx	Na0.01Ca0.27Fe''0.41Mg1.23Fe'''0.03Ti0.00Al0.13Si1.92O6	52.7987	0.0399346	3.10266	0.964278	0	13.438	0	22.7093	6.84261	0.104502	0	0
2000	1128	0.169659	0.398748	-2082.96	0.051828	0.206136	cpx	Na0.01Ca0.27Fe''0.41Mg1.23Fe'''0.03Ti0.00Al0.13Si1.92O6	52.7815	0.0403468	3.10069	0.967643	0	13.5042	0	22.6645	6.83623	0.104826	0	0
2000	1127	0.167074	0.392484	-2050.16	0.051024	0.20292	cpx	Na0.01Ca0.27Fe''0.41Mg1.23Fe'''0.03Ti0.00Al0.13Si1.92O6	52.7642	0.0407599	3.09871	0.97101	0	13.5706	0	22.6198	6.82972	0.105149	0	0
2000	1126	0.164546	0.386361	-2018.09	0.050237	0.199775	cpx	Na0.01Ca0.27Fe''0.42Mg1.23Fe'''0.03Ti0.00Al0.13Si1.92O6	52.747	0.0411739	3.09673	0.974381	0	13.6372	0	22.575	6.82306	0.10547	0	0
2000	1125	0.162075	0.380373	-1986.73	0.049467	0.196701	cpx	Na0.01Ca0.27Fe''0.42Mg1.22Fe'''0.03Ti0.00Al0.13Si1.92O6	52.7297	0.0415888	3.09474	0.977754	0	13.704	0	22.5302	6.81627	0.105789	0	0
2000	1124	0.159657	0.374518	-1956.06	0.048714	0.193694	cpx	Na0.01Ca0.27Fe''0.42Mg1.22Fe'''0.03Ti0.00Al0.13Si1.92O6	52.7123	0.0420044	3.09274	0.981131	0	13.771	0	22.4853	6.80935	0.106106	0	0
2000	1123	0.157291	0.36879	-1926.05	0.047978	0.190753	cpx	Na0.01Ca0.27Fe''0.42Mg1.22Fe'''0.03Ti0.00Al0.13Si1.92O6	52.6949	0.0424209	3.09074	0.984513	0	13.8383	0	22.4404	6.80228	0.106421	0	0
2000	1122	0.154977	0.363187	-1896.7	0.047258	0.187875	cpx	Na0.01Ca0.27Fe''0.42Mg1.22Fe'''0.03Ti0.00Al0.13Si1.92O6	52.6775	0.0428382	3.08874	0.987898	0	13.9057	0	22.3955	6.79509	0.106735	0	0
2000	1121	0.152711	0.357705	-1867.98	0.046553	0.185059	cpx	Na0.01Ca0.27Fe''0.43Mg1.22Fe'''0.03Ti0.00Al0.13Si1.92O6	52.6601	0.0432563	3.08673	0.991287	0	13.9734	0	22.3505	6.78776	0.107047	0	0
2000	1120	0.150494	0.35234	-1839.87	0.045863	0.182303	cpx	Na0.01Ca0.27Fe''0.43Mg1.21Fe'''0.03Ti0.00Al0.13Si1.92O6	52.6426	0.0436752	3.08471	0.994681	0	14.0413	0	22.3054	6.7803	0.107357	0	0
2000	1119	0.148323	0.347088	-1812.35	0.045188	0.179605	cpx	Na0.01Ca0.27Fe''0.43Mg1.21Fe'''0.03Ti0.00Al0.13Si1.92O6	52.6251	0.0440948	3.08269	0.99808	0	14.1094	0	22.2603	6.77271	0.107665	0	0
2000	1118	0.146197	0.341947	-1785.41	0.044526	0.176964	cpx	Na0.01Ca0.26Fe''0.43Mg1.21Fe'''0.03Ti0.00Al0.13Si1.92O6	52.6075	0.0445152	3.08066	1.00148	0	14.1777	0	22.2151	6.76499	0.107971	0	0
2000	1117	0.144115	0.336913	-1759.03	0.043879	0.174378	cpx	Na0.01Ca0.26Fe''0.44Mg1.21Fe'''0.03Ti0.00Al0.13Si1.92O6	52.5899	0.0449363	3.07863	1.00489	0	14.2463	0	22.1699	6.75714	0.108276	0	0
2000	1116	0.142076	0.331984	-1733.19	0.043245	0.171845	cpx	Na0.01Ca0.26Fe''0.44Mg1.21Fe'''0.03Ti0.00Al0.13Si1.92O6	52.5722	0.0453582	3.0766	1.00831	0	14.3151	0	22.1246	6.74916	0.108579	0	0
2000	1115	0.140078	0.327156	-1707.89	0.042623	0.169365	cpx	Na0.01Ca0.26Fe''0.44Mg1.20Fe'''0.03Ti0.00Al0.13Si1.92O6	52.5545	0.0457807	3.07456	1.01173	0	14.3842	0	22.0793	6.74105	0.108879	0	0
2000	1114	0.138121	0.322427	-1683.09	0.042015	0.166934	cpx	Na0.01Ca0.26Fe''0.44Mg1.20Fe'''0.03Ti0.00Al0.13Si1.92O6	52.5368	0.046204	3.07251	1.01516	0	14.4535	0	22.0339	6.73282	0.109179	0	0
2000	1113	0.136203	0.317794	-1658.81	0.041418	0.164553	cpx	Na0.01Ca0.26Fe''0.44Mg1.20Fe'''0.03Ti0.00Al0.13Si1.92O6	52.519	0.046628	3.07046	1.01859	0	14.523	0	21.9884	6.72446	0.109476	0	0
2000	1112	0.134323	0.313254	-1635	0.040834	0.16222	cpx	Na0.01Ca0.26Fe''0.45Mg1.20Fe'''0.03Ti0.00Al0.13Si1.92O6	52.5012	0.0470526	3.06841	1.02203	0	14.5928	0	21.9428	6.71598	0.109771	0	0
2000	1111	0.132481	0.308805	-1611.67	0.040261	0.159933	cpx	Na0.01Ca0.26Fe''0.45Mg1.20Fe'''0.03Ti0.00Al0.13Si1.92O6	52.4833	0.0474779	3.06635	1.02548	0	14.6628	0	21.8972	6.70737	0.110065	0	0
2000	1110	0.130674	0.304444	-1588.81	0.0397	0.157691	cpx	Na0.01Ca0.26Fe''0.45Mg1.19Fe'''0.03Ti0.00Al0.13Si1.92O6	52.4654	0.0479039	3.06429	1.02893	0	14.733	0	21.8515	6.69864	0.110356	0	0
2000	1109	0.128903	0.300169	-1566.39	0.039149	0.155494	cpx	Na0.01Ca0.26Fe''0.45Mg1.19Fe'''0.03Ti0.00Al0.13Si1.92O6	52.4474	0.0483305	3.06222	1.03239	0	14.8036	0	21.8057	6.6898	0.110646	0	0
2000	1108	0.127166	0.295978	-1544.41	0.03861	0.153339	cpx	Na0.01Ca0.26Fe''0.46Mg1.19Fe'''0.03Ti0.00Al0.13Si1.92O6	52.4294	0.0487577	3.06015	1.03586	0	14.8743	0	21.7598	6.68082	0.110934	0	0
2000	1107	0.125462	0.291869	-1522.85	0.03808	0.151226	cpx	Na0.01Ca0.26Fe''0.46Mg1.19Fe'''0.03Ti0.00Al0.13Si1.92O6	52.4113	0.0491855	3.05808	1.03934	0	14.9454	0	21.7138	6.67173	0.111221	0	0
2000	1106	0.123791	0.287839	-1501.71	0.037561	0.149154	cpx	Na0.01Ca0.26Fe''0.46Mg1.19Fe'''0.03Ti0.00Al0.13Si1.92O6	52.3931	0.0496139	3.056	1.04283	0	15.0167	0	21.6677	6.66253	0.111505	0	0
2000	1105	0.122152	0.283886	-1480.98	0.037052	0.147121	cpx	Na0.01Ca0.26Fe''0.46Mg1.18Fe'''0.03Ti0.00Al0.13Si1.92O6	52.3749	0.050043	3.05392	1.04632	0	15.0882	0	21.6216	6.6532	0.111787	0	0
2000	1104	0.120543	0.280009	-1460.63	0.036552	0.145127	cpx	Na0.01Ca0.26Fe''0.47Mg1.18Fe'''0.03Ti0.00Al0.13Si1.92O6	52.3567	0.0504726	3.05183	1.04982	0	15.16	0	21.5753	6.64376	0.112068	0	0
2000	1103	0.118965	0.276205	-1440.67	0.036062	0.143171	cpx	Na0.01Ca0.26Fe''0.47Mg1.18Fe'''0.03Ti0.00Al0.13Si1.92O6	52.3384	0.0509028	3.04974	1.05334	0	15.2321	0	21.529	6.6342	0.112347	0	0
2000	1102	0.117416	0.272473	-1421.09	0.035581	0.141251	cpx	Na0.01Ca0.26Fe''0.47Mg1.18Fe'''0.03Ti0.00Al0.13Si1.92O6	52.32	0.0513335	3.04765	1.05686	0	15.3045	0	21.4825	6.62452	0.112623	0	0
2000	1101	0.115896	0.26881	-1401.87	0.035109	0.139367	cpx	Na0.01Ca0.26Fe''0.47Mg1.17Fe'''0.03Ti0.00Al0.13Si1.92O6	52.3016	0.0517648	3.04555	1.06039	0	15.3771	0	21.4359	6.61473	0.112898	0	0
2000	1100	0.114403	0.265216	-1383	0.034646	0.137518	cpx	Na0.01Ca0.26Fe''0.47Mg1.17Fe'''0.03Ti0.00Al0.13Si1.92O6	52.2831	0.0521966	3.04345	1.06393	0	15.45	0	21.3893	6.60483	0.113172	0	0
2000	1099	0.112938	0.261688	-1364.48	0.034191	0.135703	cpx	Na0.01Ca0.26Fe''0.48Mg1.17Fe'''0.03Ti0.00Al0.13Si1.92O6	52.2646	0.0526289	3.04134	1.06749	0	15.5232	0	21.3425	6.59481	0.113443	0	0
2000	1098	0.111499	0.258225	-1346.3	0.033744	0.133921	cpx	Na0.01Ca0.26Fe''0.48Mg1.17Fe'''0.03Ti0.00Al0.13Si1.92O6	52.246	0.0530618	3.03924	1.07105	0	15.5967	0	21.2956	6.58469	0.113712	0	0
2000	1097	0.110087	0.254825	-1328.45	0.033306	0.132171	cpx	Na0.01Ca0.26Fe''0.48Mg1.17Fe'''0.03Ti0.00Al0.13Si1.92O6	52.2273	0.0534951	3.03713	1.07462	0	15.6705	0	21.2486	6.57445	0.113979	0	0
2000	1096	0.108699	0.251487	-1310.92	0.032875	0.130453	cpx	Na0.01Ca0.26Fe''0.48Mg1.16Fe'''0.03Ti0.00Al0.13Si1.92O6	52.2086	0.0539289	3.03501	1.07821	0	15.7445	0	21.2014	6.5641	0.114245	0	0
2000	1095	0.107336	0.248209	-1293.71	0.032453	0.128766	cpx	Na0.01Ca0.26Fe''0.49Mg1.16Fe'''0.03Ti0.00Al0.13Si1.92O6	52.1898	0.0543633	3.03289	1.08181	0	15.8188	0	21.1542	6.55364	0.114508	0	0
2000	1094	0.105998	0.244989	-1276.8	0.032037	0.127109	cpx	Na0.01Ca0.26Fe''0.49Mg1.16Fe'''0.03Ti0.00Al0.13Si1.92O6	52.1709	0.054798	3.03077	1.08541	0	15.8935	0	21.1068	6.54308	0.11477	0	0
2000	1093	0.104683	0.241828	-1260.2	0.031629	0.125481	cpx	Na0.01Ca0.26Fe''0.49Mg1.16Fe'''0.03Ti0.00Al0.13Si1.92O6	52.152	0.0552333	3.02865	1.08904	0	15.9684	0	21.0593	6.53241	0.11503	0	0
2000	1092	0.10339	0.238722	-1243.88	0.031228	0.123882	cpx	Na0.01Ca0.26Fe''0.49Mg1.15Fe'''0.03Ti0.00Al0.13Si1.92O6	52.133	0.055669	3.02652	1.09267	0	16.0436	0	21.0116	6.52163	0.115287	0	0
2000	1091	0.102121	0.235671	-1227.85	0.030835	0.122311	cpx	Na0.01Ca0.26Fe''0.50Mg1.15Fe'''0.03Ti0.00Al0.13Si1.92O6	52.1139	0.0561051	3.02439	1.09632	0	16.1192	0	20.9638	6.51074	0.115543	0	0
2000	1090	0.100873	0.232673	-1212.1	0.030448	0.120767	cpx	Na0.01Ca0.26Fe''0.50Mg1.15Fe'''0.03Ti0.00Al0.13Si1.92O6	52.0948	0.0565416	3.02226	1.09997	0	16.195	0	20.9159	6.49975	0.115797	0	0
2000	1089	0.099647	0.229727	-1196.62	0.030067	0.11925	cpx	Na0.01Ca0.26Fe''0.50Mg1.15Fe'''0.03Ti0.00Al0.13Si1.92O6	52.0756	0.0569786	3.02013	1.10365	0	16.2711	0	20.8678	6.48866	0.116049	0	0
2000	1088	0.098442	0.226833	-1181.41	0.029694	0.11776	cpx	Na0.01Ca0.26Fe''0.50Mg1.15Fe'''0.03Ti0.00Al0.13Si1.92O6	52.0563	0.0574159	3.01799	1.10733	0	16.3476	0	20.8196	6.47746	0.116299	0	0
2000	1087	0.097257	0.223988	-1166.46	0.029326	0.116294	cpx	Na0.01Ca0.26Fe''0.51Mg1.14Fe'''0.03Ti0.00Al0.13Si1.92O6	52.0369	0.0578537	3.01585	1.11103	0	16.4244	0	20.7713	6.46616	0.116547	0	0
2000	1086	0.096092	0.221192	-1151.76	0.028965	0.114854	cpx	Na0.01Ca0.26Fe''0.51Mg1.14Fe'''0.03Ti0.00Al0.13Si1.92O6	52.0175	0.0582918	3.01371	1.11475	0	16.5014	0	20.7228	6.45476	0.116793	0	0
2000	1085	0.094947	0.218444	-1137.32	0.02861	0.113438	cpx	Na0.01Ca0.26Fe''0.51Mg1.14Fe'''0.03Ti0.00Al0.13Si1.92O6	51.998	0.0587304	3.01156	1.11848	0	16.5788	0	20.6741	6.44326	0.117037	0	0
2000	1084	0.093821	0.215743	-1123.11	0.028261	0.112046	cpx	Na0.01Ca0.25Fe''0.51Mg1.14Fe'''0.03Ti0.00Al0.13Si1.92O6	51.9784	0.0591693	3.00941	1.12222	0	16.6565	0	20.6253	6.43165	0.117279	0	0
2000	1083	0.092714	0.213087	-1109.15	0.027918	0.110678	cpx	Na0.01Ca0.25Fe''0.52Mg1.13Fe'''0.03Ti0.00Al0.13Si1.92O6	51.9587	0.0596085	3.00726	1.12599	0	16.7346	0	20.5764	6.41995	0.117519	0	0
2000	1082	0.091625	0.210475	-1095.41	0.027581	0.109332	cpx	Na0.01Ca0.25Fe''0.52Mg1.13Fe'''0.03Ti0.00Al0.13Si1.92O6	51.939	0.0600481	3.00511	1.12976	0	16.813	0	20.5272	6.40815	0.117757	0	0
2000	1081	0.090554	0.207907	-1081.91	0.027249	0.108008	cpx	Na0.01Ca0.25Fe''0.52Mg1.13Fe'''0.03Ti0.00Al0.13Si1.92O6	51.9192	0.060488	3.00296	1.13355	0	16.8917	0	20.4779	6.39625	0.117993	0	0
2000	1080	0.0895	0.205382	-1068.62	0.026923	0.106707	cpx	Na0.01Ca0.25Fe''0.53Mg1.13Fe'''0.03Ti0.00Al0.13Si1.92O6	51.8992	0.0609283	3.0008	1.13736	0	16.9707	0	20.4285	6.38426	0.118227	0	0
2000	1079	0.088464	0.202898	-1055.56	0.026601	0.105427	cpx	Na0.01Ca0.25Fe''0.53Mg1.13Fe'''0.03Ti0.00Al0.13Si1.92O6	51.8793	0.0613689	2.99864	1.14119	0	17.05	0	20.3789	6.37217	0.118459	0	0
2000	1078	0.087444	0.200456	-1042.7	0.026286	0.104167	cpx	Na0.01Ca0.25Fe''0.53Mg1.12Fe'''0.03Ti0.00Al0.13Si1.92O6	51.8592	0.0618098	2.99648	1.14503	0	17.1298	0	20.3291	6.35999	0.118689	0	0
2000	1077	0.086441	0.198053	-1030.06	0.025975	0.102929	cpx	Na0.01Ca0.25Fe''0.53Mg1.12Fe'''0.03Ti0.00Al0.13Si1.92O6	51.839	0.062251	2.99432	1.14889	0	17.2098	0	20.2791	6.34771	0.118917	0	0
2000	1076	0.085454	0.19569	-1017.62	0.025669	0.10171	cpx	Na0.01Ca0.25Fe''0.54Mg1.12Fe'''0.03Ti0.00Al0.13Si1.92O6	51.8188	0.0626925	2.99215	1.15277	0	17.2902	0	20.2289	6.33533	0.119142	0	0
2000	1075	0.084483	0.193364	-1005.38	0.025369	0.100511	cpx	Na0.01Ca0.25Fe''0.54Mg1.12Fe'''0.03Ti0.00Al0.13Si1.92O6	51.7984	0.0631343	2.98999	1.15666	0	17.3709	0	20.1786	6.32287	0.119366	0	0
2000	1074	0.083527	0.191077	-993.339	0.025073	0.099331	cpx	Na0.01Ca0.25Fe''0.54Mg1.11Fe'''0.03Ti0.00Al0.13Si1.92O6	51.778	0.0635764	2.98782	1.16058	0	17.452	0	20.1281	6.31031	0.119588	0	0
2000	1073	0.082587	0.188826	-981.488	0.024781	0.09817	cpx	Na0.01Ca0.25Fe''0.54Mg1.11Fe'''0.03Ti0.00Al0.13Si1.92O6	51.7575	0.0640187	2.98565	1.16451	0	17.5335	0	20.0774	6.29766	0.119808	0	0
2000	1072	0.081661	0.186611	-969.825	0.024495	0.097027	cpx	Na0.01Ca0.25Fe''0.55Mg1.11Fe'''0.03Ti0.00Al0.13Si1.92O6	51.7369	0.0644613	2.98348	1.16847	0	17.6152	0	20.0265	6.28492	0.120025	0	0
2000	1071	0.08075	0.184431	-958.345	0.024213	0.095902	cpx	Na0.01Ca0.25Fe''0.55Mg1.11Fe'''0.03Ti0.00Al0.13Si1.92O6	51.7162	0.0649042	2.9813	1.17244	0	17.6974	0	19.9754	6.27209	0.12024	0	0
2000	1070	0.079853	0.182286	-947.046	0.023935	0.094795	cpx	Na0.01Ca0.25Fe''0.55Mg1.10Fe'''0.03Ti0.00Al0.13Si1.92O6	51.6954	0.0653473	2.97913	1.17643	0	17.7799	0	19.9241	6.25917	0.120454	0	0
2000	1069	0.07897	0.180174	-935.924	0.023662	0.093706	cpx	Na0.01Ca0.25Fe''0.56Mg1.10Fe'''0.03Ti0.00Al0.13Si1.92O6	51.6745	0.0657906	2.97695	1.18045	0	17.8628	0	19.8727	6.24616	0.120665	0	0
2000	1068	0.0781	0.178096	-924.975	0.023393	0.092633	cpx	Na0.01Ca0.25Fe''0.56Mg1.10Fe'''0.03Ti0.00Al0.13Si1.92O6	51.6536	0.0662342	2.97477	1.18448	0	17.946	0	19.821	6.23307	0.120874	0	0
2000	1067	0.077244	0.17605	-914.195	0.023128	0.091577	cpx	Na0.01Ca0.25Fe''0.56Mg1.10Fe'''0.03Ti0.00Al0.13Si1.92O6	51.6325	0.066678	2.97259	1.18854	0	18.0297	0	19.7691	6.21989	0.121081	0	0
2000	1066	0.076401	0.174037	-903.582	0.022867	0.090538	cpx	Na0.01Ca0.25Fe''0.56Mg1.09Fe'''0.03Ti0.00Al0.13Si1.92O6	51.6113	0.067122	2.97041	1.19261	0	18.1136	0	19.717	6.20662	0.121286	0	0
2000	1065	0.075571	0.172054	-893.132	0.02261	0.089514	cpx	Na0.01Ca0.25Fe''0.57Mg1.09Fe'''0.03Ti0.00Al0.13Si1.92O6	51.59	0.0675663	2.96823	1.19671	0	18.198	0	19.6647	6.19327	0.121489	0	0
2000	1064	0.074754	0.170102	-882.842	0.022357	0.088506	cpx	Na0.01Ca0.25Fe''0.57Mg1.09Fe'''0.03Ti0.00Al0.13Si1.92O6	51.5687	0.0680107	2.96604	1.20084	0	18.2828	0	19.6122	6.17983	0.121689	0	0
2000	1063	0.073949	0.16818	-872.709	0.022108	0.087514	cpx	Na0.01Ca0.25Fe''0.57Mg1.09Fe'''0.03Ti0.00Al0.13Si1.92O6	51.5472	0.0684554	2.96386	1.20498	0	18.3679	0	19.5594	6.16631	0.121888	0	0
2000	1062	0.073156	0.166287	-862.729	0.021863	0.086537	cpx	Na0.01Ca0.25Fe''0.58Mg1.08Fe'''0.03Ti0.00Al0.13Si1.92O6	51.5256	0.0689002	2.96167	1.20915	0	18.4534	0	19.5065	6.1527	0.122084	0	0
2000	1061	0.072375	0.164424	-852.9	0.021622	0.085574	cpx	Na0.01Ca0.25Fe''0.58Mg1.08Fe'''0.03Ti0.00Al0.13Si1.92O6	51.5039	0.0693453	2.95948	1.21334	0	18.5393	0	19.4533	6.13902	0.122278	0	0
2000	1060	0.071606	0.162588	-843.219	0.021384	0.084626	cpx	Na0.01Ca0.24Fe''0.58Mg1.08Fe'''0.03Ti0.00Al0.13Si1.92O6	51.4821	0.0697905	2.95729	1.21756	0	18.6256	0	19.3999	6.12525	0.12247	0	0
2000	1059	0.070848	0.160781	-833.683	0.021149	0.083692	cpx	Na0.01Ca0.24Fe''0.58Mg1.08Fe'''0.03Ti0.00Al0.13Si1.92O6	51.4602	0.0702359	2.9551	1.2218	0	18.7123	0	19.3463	6.1114	0.122659	0	0
2000	1058	0.070102	0.159	-824.289	0.020919	0.082772	cpx	Na0.01Ca0.24Fe''0.59Mg1.07Fe'''0.03Ti0.00Al0.13Si1.92O6	51.4382	0.0706814	2.95291	1.22607	0	18.7994	0	19.2924	6.09747	0.122847	0	0
2000	1057	0.069367	0.157247	-815.035	0.020691	0.081866	cpx	Na0.01Ca0.24Fe''0.59Mg1.07Fe'''0.03Ti0.00Al0.13Si1.92O6	51.4161	0.0711272	2.95071	1.23036	0	18.8868	0	19.2383	6.08347	0.123032	0	0
2000	1056	0.068642	0.155519	-805.918	0.020467	0.080973	cpx	Na0.01Ca0.24Fe''0.59Mg1.07Fe'''0.03Ti0.00Al0.13Si1.92O6	51.3939	0.071573	2.94852	1.23468	0	18.9747	0	19.184	6.06938	0.123215	0	0
2000	1055	0.067928	0.153818	-796.936	0.020247	0.080094	cpx	Na0.01Ca0.24Fe''0.60Mg1.07Fe'''0.03Ti0.00Al0.13Si1.92O6	51.3716	0.0720191	2.94632	1.23902	0	19.063	0	19.1294	6.05522	0.123396	0	0
2000	1054	0.067225	0.152142	-788.086	0.020029	0.079227	cpx	Na0.01Ca0.24Fe''0.60Mg1.06Fe'''0.03Ti0.00Al0.13Si1.92O6	51.3491	0.0724653	2.94412	1.2434	0	19.1517	0	19.0746	6.04098	0.123574	0	0
2000	1053	0.066532	0.15049	-779.365	0.019815	0.078373	cpx	Na0.01Ca0.24Fe''0.60Mg1.06Fe'''0.04Ti0.00Al0.13Si1.92O6	51.3266	0.0729116	2.94192	1.24779	0	19.2408	0	19.0195	6.02666	0.12375	0	0
2000	1052	0.065848	0.148863	-770.771	0.019604	0.077532	cpx	Na0.01Ca0.24Fe''0.60Mg1.06Fe'''0.04Ti0.00Al0.13Si1.92O6	51.3039	0.0733581	2.93972	1.25222	0	19.3304	0	18.9642	6.01227	0.123924	0	0
2000	1051	0.065175	0.14726	-762.303	0.019396	0.076703	cpx	Na0.01Ca0.24Fe''0.61Mg1.06Fe'''0.04Ti0.00Al0.13Si1.92O6	51.2811	0.0738047	2.93752	1.25668	0	19.4203	0	18.9086	5.9978	0.124096	0	0
2000	1050	0.064512	0.14568	-753.957	0.019191	0.075886	cpx	Na0.01Ca0.24Fe''0.61Mg1.05Fe'''0.04Ti0.00Al0.13Si1.92O6	51.2582	0.0742514	2.93532	1.26116	0	19.5107	0	18.8528	5.98326	0.124266	0	0
2000	1049	0.063858	0.144123	-745.731	0.018989	0.075081	cpx	Na0.01Ca0.24Fe''0.61Mg1.05Fe'''0.04Ti0.00Al0.13Si1.92O6	51.2352	0.0746983	2.93311	1.26567	0	19.6015	0	18.7967	5.96864	0.124433	0	0
2000	1048	0.063213	0.142589	-737.624	0.018789	0.074287	cpx	Na0.01Ca0.24Fe''0.62Mg1.05Fe'''0.04Ti0.00Al0.13Si1.92O6	51.2121	0.0751453	2.93091	1.27022	0	19.6927	0	18.7404	5.95395	0.124597	0	0
2000	1047	0.062578	0.141078	-729.633	0.018593	0.073505	cpx	Na0.01Ca0.24Fe''0.62Mg1.04Fe'''0.04Ti0.00Al0.13Si1.92O6	51.1888	0.0755924	2.9287	1.27479	0	19.7844	0	18.6838	5.93919	0.12476	0	0
2000	1046	0.061952	0.139588	-721.756	0.0184	0.072734	cpx	Na0.01Ca0.24Fe''0.62Mg1.04Fe'''0.04Ti0.00Al0.13Si1.92O6	51.1654	0.0760397	2.92649	1.2794	0	19.8765	0	18.6269	5.92436	0.12492	0	0
2000	1045	0.061335	0.138119	-713.992	0.018209	0.071975	cpx	Na0.01Ca0.24Fe''0.63Mg1.04Fe'''0.04Ti0.00Al0.13Si1.92O6	51.1419	0.076487	2.92428	1.28403	0	19.969	0	18.5698	5.90946	0.125078	0	0
2000	1044	0.060726	0.136672	-706.337	0.018021	0.071225	cpx	Na0.01Ca0.24Fe''0.63Mg1.04Fe'''0.04Ti0.00Al0.13Si1.92O6	51.1183	0.0769345	2.92207	1.2887	0	20.062	0	18.5123	5.89449	0.125233	0	0
2000	1043	0.060126	0.135246	-698.791	0.017836	0.070487	cpx	Na0.01Ca0.24Fe''0.63Mg1.03Fe'''0.04Ti0.00Al0.13Si1.92O6	51.0945	0.0773821	2.91985	1.2934	0	20.1554	0	18.4546	5.87945	0.125386	0	0
2000	1042	0.059535	0.133839	-691.351	0.017653	0.069759	cpx	Na0.01Ca0.24Fe''0.64Mg1.03Fe'''0.04Ti0.00Al0.13Si1.92O6	51.0706	0.0778298	2.91764	1.29813	0	20.2492	0	18.3967	5.86434	0.125537	0	0
2000	1041	0.058951	0.132453	-684.015	0.017473	0.069041	cpx	Na0.01Ca0.24Fe''0.64Mg1.03Fe'''0.04Ti0.00Al0.13Si1.92O6	51.0466	0.0782776	2.91542	1.3029	0	20.3435	0	18.3384	5.84917	0.125685	0	0
2000	1040	0.058376	0.131087	-676.783	0.017295	0.068334	cpx	Na0.01Ca0.24Fe''0.64Mg1.03Fe'''0.04Ti0.00Al0.13Si1.92O6	51.0225	0.0787254	2.9132	1.3077	0	20.4383	0	18.2798	5.83392	0.125831	0	0
2000	1039	0.057809	0.129739	-669.651	0.01712	0.067636	cpx	Na0.01Ca0.23Fe''0.65Mg1.02Fe'''0.04Ti0.00Al0.13Si1.92O6	50.9982	0.0791734	2.91098	1.31253	0	20.5335	0	18.221	5.81862	0.125974	0	0
2000	1038	0.05725	0.128411	-662.619	0.016947	0.066948	cpx	Na0.01Ca0.23Fe''0.65Mg1.02Fe'''0.04Ti0.00Al0.13Si1.92O6	50.9738	0.0796215	2.90876	1.3174	0	20.6292	0	18.1619	5.80324	0.126115	0	0
2000	1037	0.056699	0.127102	-655.684	0.016777	0.06627	cpx	Na0.01Ca0.23Fe''0.65Mg1.02Fe'''0.04Ti0.00Al0.13Si1.92O6	50.9493	0.0800697	2.90654	1.32231	0	20.7253	0	18.1024	5.7878	0.126254	0	0
2000	1036	0.056155	0.125811	-648.845	0.016609	0.065601	cpx	Na0.01Ca0.23Fe''0.66Mg1.01Fe'''0.04Ti0.00Al0.13Si1.92O6	50.9246	0.080518	2.90431	1.32725	0	20.8219	0	18.0427	5.7723	0.12639	0	0
2000	1035	0.055619	0.124538	-642.1	0.016443	0.064941	cpx	Na0.01Ca0.23Fe''0.66Mg1.01Fe'''0.04Ti0.00Al0.13Si1.92O6	50.8998	0.0809664	2.90209	1.33223	0	20.919	0	17.9827	5.75674	0.126524	0	0
2000	1034	0.05509	0.123283	-635.449	0.01628	0.064291	cpx	Na0.01Ca0.23Fe''0.66Mg1.01Fe'''0.04Ti0.00Al0.13Si1.92O6	50.8749	0.0814148	2.89986	1.33724	0	21.0165	0	17.9223	5.74111	0.126655	0	0
2000	1033	0.054474	0.121834	-627.803	0.016091	0.063539	cpx	Na0.01Ca0.23Fe''0.67Mg1.00Fe'''0.04Ti0.00Al0.13Si1.92O6	50.85	0.0818464	2.89754	1.34222	0	21.1142	0	17.862	5.72546	0.126783	0	0
2000	1032	0.053893	0.120464	-620.57	0.015913	0.062829	cpx	Na0.01Ca0.23Fe''0.67Mg1.00Fe'''0.04Ti0.00Al0.13Si1.92O6	50.8251	0.0822655	2.89516	1.34719	0	21.212	0	17.8016	5.70978	0.126907	0	0
2000	1031	0.053374	0.119234	-614.054	0.015753	0.062191	cpx	Na0.01Ca0.23Fe''0.67Mg1.00Fe'''0.04Ti0.00Al0.13Si1.92O6	50.8001	0.0826823	2.89277	1.35219	0	21.3102	0	17.7409	5.69404	0.127028	0	0
2000	1030	0.052863	0.118025	-607.65	0.015595	0.061564	cpx	Na0.01Ca0.23Fe''0.68Mg1.00Fe'''0.04Ti0.00Al0.13Si1.92O6	50.775	0.0830971	2.89038	1.35722	0	21.4089	0	17.68	5.67826	0.127147	0	0
2000	1029	0.052359	0.116832	-601.328	0.01544	0.060946	cpx	Na0.01Ca0.23Fe''0.68Mg0.99Fe'''0.04Ti0.00Al0.13Si1.92O6	50.7498	0.0835099	2.88797	1.36228	0	21.5081	0	17.6187	5.66242	0.127264	0	0
2000	1028	0.051862	0.115654	-595.086	0.015287	0.060335	cpx	Na0.01Ca0.23Fe''0.68Mg0.99Fe'''0.04Ti0.00Al0.13Si1.92O6	50.7244	0.0839205	2.88556	1.36738	0	21.6077	0	17.5571	5.64654	0.127377	0	0
2000	1027	0.05137	0.114491	-588.924	0.015135	0.059732	cpx	Na0.01Ca0.23Fe''0.69Mg0.99Fe'''0.04Ti0.00Al0.13Si1.92O6	50.6989	0.0843287	2.88313	1.37252	0	21.7077	0	17.4953	5.6306	0.127489	0	0
2000	1026	0.050885	0.113342	-582.838	0.014986	0.059136	cpx	Na0.01Ca0.23Fe''0.69Mg0.98Fe'''0.04Ti0.00Al0.13Si1.92O6	50.6733	0.0847345	2.8807	1.37768	0	21.8083	0	17.4331	5.61462	0.127597	0	0
2000	1025	0.050406	0.112209	-576.828	0.014838	0.058548	cpx	Na0.01Ca0.23Fe''0.69Mg0.98Fe'''0.04Ti0.00Al0.13Si1.92O6	50.6475	0.0851377	2.87825	1.38289	0	21.9092	0	17.3707	5.59859	0.127703	0	0
2000	1024	0.049933	0.111089	-570.893	0.014692	0.057967	cpx	Na0.01Ca0.23Fe''0.70Mg0.98Fe'''0.04Ti0.00Al0.13Si1.92O6	50.6217	0.085538	2.87579	1.38812	0	22.0106	0	17.3079	5.58252	0.127807	0	0
2000	1023	0.049466	0.109985	-565.037	0.014548	0.057394	cpx	Na0.01Ca0.23Fe''0.70Mg0.97Fe'''0.04Ti0.00Al0.13Si1.92O6	50.5957	0.0859353	2.87332	1.3934	0	22.1125	0	17.2448	5.5664	0.127908	0	0
2000	1022	0.049005	0.108896	-559.265	0.014406	0.056829	cpx	Na0.01Ca0.23Fe''0.70Mg0.97Fe'''0.04Ti0.00Al0.13Si1.92O6	50.5696	0.0863294	2.87084	1.3987	0	22.2149	0	17.1815	5.55024	0.128006	0	0
2000	1021	0.048551	0.107821	-553.564	0.014266	0.056271	cpx	Na0.01Ca0.23Fe''0.71Mg0.97Fe'''0.04Ti0.00Al0.13Si1.92O6	50.5433	0.0867202	2.86834	1.40405	0	22.3177	0	17.1178	5.53404	0.128102	0	0
2000	1020	0.048101	0.10676	-547.93	0.014128	0.05572	cpx	Na0.01Ca0.22Fe''0.71Mg0.97Fe'''0.04Ti0.00Al0.13Si1.92O6	50.5169	0.0871073	2.86583	1.40943	0	22.4209	0	17.0538	5.5178	0.128194	0	0
2000	1019	0.047657	0.10571	-542.364	0.013991	0.055175	cpx	Na0.01Ca0.22Fe''0.72Mg0.96Fe'''0.04Ti0.00Al0.13Si1.92O6	50.4905	0.0874906	2.8633	1.41484	0	22.5246	0	16.9895	5.50153	0.128285	0	0
2000	1018	0.047218	0.104674	-536.863	0.013856	0.054637	cpx	Na0.01Ca0.22Fe''0.72Mg0.96Fe'''0.04Ti0.00Al0.13Si1.92O6	50.4638	0.0878698	2.86076	1.42029	0	22.6288	0	16.9249	5.48522	0.128372	0	0
2000	1017	0.046784	0.103649	-531.426	0.013722	0.054105	cpx	Na0.01Ca0.22Fe''0.72Mg0.96Fe'''0.04Ti0.00Al0.13Si1.92O6	50.4371	0.0882447	2.8582	1.42577	0	22.7334	0	16.86	5.46887	0.128457	0	0
2000	1016	0.046355	0.102637	-526.052	0.01359	0.053579	cpx	Na0.01Ca0.22Fe''0.73Mg0.95Fe'''0.04Ti0.00Al0.13Si1.92O6	50.4102	0.0886149	2.85562	1.43129	0	22.8385	0	16.7948	5.4525	0.128539	0	0
2000	1015	0.045931	0.101636	-520.74	0.013459	0.053059	cpx	Na0.01Ca0.22Fe''0.73Mg0.95Fe'''0.04Ti0.00Al0.13Si1.92O6	50.3832	0.0889802	2.85302	1.43685	0	22.944	0	16.7292	5.43609	0.128619	0	0
2000	1014	0.045512	0.100646	-515.487	0.01333	0.052545	cpx	Na0.01Ca0.22Fe''0.73Mg0.95Fe'''0.04Ti0.00Al0.13Si1.92O6	50.3561	0.0893403	2.85041	1.44244	0	23.05	0	16.6634	5.41966	0.128695	0	0
2000	1013	0.045097	0.099668	-510.293	0.013203	0.052037	cpx	Na0.01Ca0.22Fe''0.74Mg0.94Fe'''0.04Ti0.00Al0.13Si1.92O6	50.3289	0.0896948	2.84777	1.44807	0	23.1564	0	16.5972	5.4032	0.128769	0	0
2000	1012	0.044687	0.0987	-505.155	0.013076	0.051534	cpx	Na0.01Ca0.22Fe''0.74Mg0.94Fe'''0.04Ti0.00Al0.13Si1.92O6	50.3015	0.0900434	2.84512	1.45373	0	23.2633	0	16.5307	5.38671	0.12884	0	0
2000	1011	0.04428	0.097743	-500.073	0.012951	0.051037	cpx	Na0.01Ca0.22Fe''0.75Mg0.94Fe'''0.04Ti0.00Al0.13Si1.92O6	50.2741	0.0903857	2.84244	1.45943	0	23.3706	0	16.464	5.37021	0.128909	0	0
2000	1010	0.043878	0.096796	-495.043	0.012828	0.050544	cpx	Na0.01Ca0.22Fe''0.75Mg0.93Fe'''0.04Ti0.00Al0.13Si1.92O6	50.2465	0.0907212	2.83974	1.46516	0	23.4784	0	16.3969	5.35368	0.128975	0	0
2000	1009	0.04348	0.095858	-490.064	0.012705	0.050057	cpx	Na0.01Ca0.22Fe''0.75Mg0.93Fe'''0.04Ti0.00Al0.13Si1.92O6	50.2188	0.0910495	2.83701	1.47093	0	23.5866	0	16.3295	5.33714	0.129038	0	0
2000	1008	0.043086	0.09493	-485.133	0.012584	0.049574	cpx	Na0.01Ca0.22Fe''0.76Mg0.93Fe'''0.04Ti0.00Al0.13Si1.92O6	50.1909	0.09137	2.83425	1.47673	0	23.6953	0	16.2618	5.32058	0.129098	0	0
2000	1007	0.042694	0.094009	-480.245	0.012464	0.049096	cpx	Na0.01Ca0.22Fe''0.76Mg0.92Fe'''0.04Ti0.00Al0.13Si1.92O6	50.163	0.0916821	2.83147	1.48256	0	23.8044	0	16.1937	5.30401	0.129155	0	0
2000	1006	0.042306	0.093096	-475.396	0.012344	0.048621	cpx	Na0.01Ca0.22Fe''0.76Mg0.92Fe'''0.04Ti0.00Al0.13Si1.92O6	50.135	0.0919849	2.82866	1.48842	0	23.9139	0	16.1254	5.28744	0.12921	0	0
2000	1005	0.04192	0.092188	-470.576	0.012226	0.048148	cpx	Na0.01Ca0.22Fe''0.77Mg0.92Fe'''0.04Ti0.00Al0.13Si1.92O6	50.1069	0.0922775	2.82581	1.49432	0	24.0238	0	16.0568	5.27086	0.129262	0	0
2000	1004	0.041534	0.091283	-465.774	0.012108	0.047678	cpx	Na0.01Ca0.22Fe''0.77Mg0.91Fe'''0.04Ti0.00Al0.13Si1.92O6	50.0786	0.0925586	2.82293	1.50024	0	24.1341	0	15.9879	5.25429	0.129311	0	0
2000	1003	0.041147	0.090376	-460.964	0.011989	0.047206	cpx	Na0.01Ca0.21Fe''0.78Mg0.91Fe'''0.04Ti0.00Al0.13Si1.92O6	50.0503	0.092826	2.82	1.50618	0	24.2448	0	15.9188	5.23772	0.129357	0	0
2000	1002	0.040755	0.089458	-456.1	0.011869	0.046728	cpx	Na0.01Ca0.21Fe''0.78Mg0.91Fe'''0.04Ti0.00Al0.13Si1.92O6	50.022	0.0930764	2.81702	1.51213	0	24.3558	0	15.8494	5.22118	0.1294	0	0
2000	1001	0.040347	0.088507	-451.069	0.011744	0.046233	cpx	Na0.01Ca0.21Fe''0.78Mg0.90Fe'''0.04Ti0.00Al0.13Si1.92O6	49.9937	0.0933033	2.81397	1.51808	0	24.467	0	15.7799	5.20468	0.129441	0	0
2000	1000	0.039892	0.087453	-445.518	0.011606	0.045684	cpx	Na0.01Ca0.21Fe''0.79Mg0.90Fe'''0.04Ti0.00Al0.13Si1.92O6	49.9654	0.0934897	2.81079	1.52399	0	24.5782	0	15.7104	5.18828	0.129478	0	0
2000	999	0.040622	0.088995	-453.171	0.011812	0.046491	cpx	Na0.01Ca0.21Fe''0.79Mg0.89Fe'''0.04Ti0.00Al0.13Si1.92O6	49.9345	0.0940023	2.80859	1.53085	0	24.6949	0	15.6368	5.17084	0.129517	0	0
2000	998	0.036337	0.07956	-405.014	0.010562	0.041566	cpx	Na0.01Ca0.21Fe''0.80Mg0.89Fe'''0.04Ti0.00Al0.13Si1.92O6	49.9131	0.0932545	2.80265	1.53431	0	24.7932	0	15.5767	5.1573	0.129537	0	0
2000	997	0.033196	0.07264	-369.73	0.009646	0.037955	cpx	Na0.01Ca0.21Fe''0.80Mg0.89Fe'''0.04Ti0.00Al0.13Si1.92O6	49.8985	0.0916379	2.7941	1.53535	0	24.8783	0	15.526	5.1465	0.129545	0	0
2000	996	0.032809	0.07175	-365.148	0.00953	0.037495	cpx	Na0.01Ca0.21Fe''0.80Mg0.89Fe'''0.04Ti0.00Al0.13Si1.92O6	49.8838	0.0900395	2.78558	1.53639	0	24.9637	0	15.4752	5.13566	0.129551	0	0
2000	995	0.032427	0.070873	-360.629	0.009415	0.037041	cpx	Na0.01Ca0.21Fe''0.81Mg0.88Fe'''0.04Ti0.00Al0.13Si1.92O6	49.8691	0.0884591	2.77706	1.53744	0	25.0493	0	15.4243	5.1248	0.129555	0	0
2000	994	0.032051	0.070008	-356.173	0.009303	0.036594	cpx	Na0.01Ca0.21Fe''0.81Mg0.88Fe'''0.04Ti0.00Al0.13Si1.92O6	49.8542	0.0868966	2.76856	1.53851	0	25.1351	0	15.3733	5.11392	0.129558	0	0
2000	993	0.031679	0.069155	-351.776	0.009191	0.036152	cpx	Na0.01Ca0.21Fe''0.81Mg0.88Fe'''0.04Ti0.00Al0.13Si1.92O6	49.8393	0.085352	2.76008	1.53958	0	25.2211	0	15.322	5.10301	0.129559	0	0
2000	992	0.031312	0.068313	-347.44	0.009082	0.035717	cpx	Na0.01Ca0.21Fe''0.81Mg0.88Fe'''0.04Ti0.00Al0.12Si1.92O6	49.8243	0.083825	2.75161	1.54065	0	25.3073	0	15.2707	5.09208	0.129558	0	0
2000	991	0.03095	0.067483	-343.161	0.008973	0.035287	cpx	Na0.01Ca0.21Fe''0.82Mg0.87Fe'''0.04Ti0.00Al0.12Si1.92O6	49.8092	0.0823155	2.74316	1.54174	0	25.3937	0	15.2192	5.08112	0.129556	0	0
2000	990	0.030592	0.066663	-338.94	0.008866	0.034863	cpx	Na0.01Ca0.21Fe''0.82Mg0.87Fe'''0.04Ti0.00Al0.12Si1.92O6	49.794	0.0808235	2.73471	1.54284	0	25.4804	0	15.1676	5.07015	0.129551	0	0
2000	989	0.030239	0.065855	-334.774	0.008761	0.034444	cpx	Na0.01Ca0.21Fe''0.82Mg0.87Fe'''0.04Ti0.00Al0.12Si1.92O6	49.7787	0.0793489	2.72628	1.54394	0	25.5672	0	15.1158	5.05915	0.129546	0	0
2000	988	0.029891	0.065057	-330.663	0.008657	0.034031	cpx	Na0.01Ca0.21Fe''0.83Mg0.87Fe'''0.04Ti0.00Al0.12Si1.92O6	49.7634	0.0778914	2.71787	1.54505	0	25.6543	0	15.0639	5.04814	0.129538	0	0
2000	987	0.029547	0.064269	-326.606	0.008554	0.033624	cpx	Na0.01Ca0.21Fe''0.83Mg0.86Fe'''0.04Ti0.00Al0.12Si1.92O6	49.748	0.0764511	2.70946	1.54616	0	25.7415	0	15.0118	5.0371	0.129529	0	0
2000	986	0.029207	0.063492	-322.602	0.008453	0.033221	cpx	Na0.01Ca0.21Fe''0.83Mg0.86Fe'''0.04Ti0.00Al0.12Si1.92O6	49.7325	0.0750277	2.70107	1.54729	0	25.829	0	14.9596	5.02605	0.129518	0	0
2000	985	0.028871	0.062725	-318.649	0.008352	0.032824	cpx	Na0.01Ca0.21Fe''0.84Mg0.86Fe'''0.04Ti0.00Al0.12Si1.92O6	49.7169	0.0736213	2.69269	1.54842	0	25.9167	0	14.9072	5.01498	0.129505	0	0
2000	984	0.02854	0.061967	-314.747	0.008253	0.032431	cpx	Na0.01Ca0.21Fe''0.84Mg0.86Fe'''0.05Ti0.00Al0.12Si1.92O6	49.7012	0.0722316	2.68432	1.54956	0	26.0045	0	14.8547	5.00389	0.129491	0	0
2000	983	0.028213	0.061219	-310.895	0.008156	0.032044	cpx	Na0.01Ca0.21Fe''0.84Mg0.85Fe'''0.05Ti0.00Al0.12Si1.92O6	49.6855	0.0708586	2.67596	1.5507	0	26.0926	0	14.8021	4.99279	0.129475	0	0
2000	982	0.027889	0.060481	-307.091	0.008059	0.031661	cpx	Na0.01Ca0.21Fe''0.85Mg0.85Fe'''0.05Ti0.00Al0.12Si1.92O6	49.6697	0.0695021	2.66761	1.55185	0	26.1809	0	14.7493	4.98167	0.129458	0	0
2000	981	0.02757	0.059752	-303.334	0.007964	0.031283	cpx	Na0.01Ca0.21Fe''0.85Mg0.85Fe'''0.05Ti0.00Al0.12Si1.92O6	49.6538	0.0681622	2.65926	1.55301	0	26.2693	0	14.6964	4.97054	0.129439	0	0
2000	980	0.027254	0.059031	-299.624	0.00787	0.03091	cpx	Na0.01Ca0.21Fe''0.85Mg0.84Fe'''0.05Ti0.00Al0.12Si1.92O6	49.6379	0.0668385	2.65093	1.55417	0	26.358	0	14.6434	4.95939	0.129418	0	0
2000	979	0.026942	0.05832	-295.96	0.007777	0.030541	cpx	Na0.01Ca0.21Fe''0.86Mg0.84Fe'''0.05Ti0.00Al0.12Si1.92O6	49.6218	0.0655312	2.64261	1.55534	0	26.4468	0	14.5902	4.94824	0.129395	0	0
2000	978	0.026634	0.057617	-292.341	0.007685	0.030177	cpx	Na0.01Ca0.20Fe''0.86Mg0.84Fe'''0.05Ti0.00Al0.12Si1.92O6	49.6057	0.06424	2.6343	1.55652	0	26.5359	0	14.5369	4.93707	0.129371	0	0
2000	977	0.026329	0.056923	-288.765	0.007594	0.029817	cpx	Na0.01Ca0.20Fe''0.86Mg0.84Fe'''0.05Ti0.00Al0.12Si1.92O6	49.5895	0.0629648	2.62599	1.5577	0	26.6251	0	14.4834	4.92589	0.129346	0	0
2000	976	0.026027	0.056237	-285.233	0.007504	0.029461	cpx	Na0.01Ca0.20Fe''0.87Mg0.83Fe'''0.05Ti0.00Al0.12Si1.92O6	49.5733	0.0617056	2.61769	1.55888	0	26.7146	0	14.4299	4.9147	0.129318	0	0
2000	975	0.02573	0.055559	-281.742	0.007415	0.02911	cpx	Na0.01Ca0.20Fe''0.87Mg0.83Fe'''0.05Ti0.00Al0.12Si1.92O6	49.557	0.0604622	2.6094	1.56007	0	26.8042	0	14.3761	4.9035	0.129289	0	0
2000	974	0.025435	0.054889	-278.293	0.007328	0.028762	cpx	Na0.01Ca0.20Fe''0.87Mg0.83Fe'''0.05Ti0.00Al0.12Si1.92O6	49.5406	0.0592346	2.60112	1.56126	0	26.894	0	14.3223	4.8923	0.129258	0	0
2000	973	0.025144	0.054227	-274.883	0.007241	0.028419	cpx	Na0.01Ca0.20Fe''0.88Mg0.83Fe'''0.05Ti0.00Al0.12Si1.92O6	49.5241	0.0580227	2.59284	1.56246	0	26.9839	0	14.2683	4.88108	0.129226	0	0
2000	972	0.024856	0.053572	-271.514	0.007155	0.028079	cpx	Na0.01Ca0.20Fe''0.88Mg0.82Fe'''0.05Ti0.00Al0.12Si1.92O6	49.5076	0.0568263	2.58457	1.56365	0	27.0741	0	14.2142	4.86986	0.129192	0	0
2000	971	0.024571	0.052925	-268.183	0.007071	0.027743	cpx	Na0.01Ca0.20Fe''0.88Mg0.82Fe'''0.05Ti0.00Al0.12Si1.92O6	49.491	0.0556454	2.5763	1.56486	0	27.1644	0	14.16	4.85864	0.129157	0	0
2000	970	0.024289	0.052285	-264.89	0.006987	0.027411	cpx	Na0.01Ca0.20Fe''0.89Mg0.82Fe'''0.05Ti0.00Al0.12Si1.92O6	49.4744	0.0544798	2.56804	1.56606	0	27.2549	0	14.1056	4.84741	0.12912	0	0
2000	969	0.02401	0.051653	-261.633	0.006904	0.027083	cpx	Na0.01Ca0.20Fe''0.89Mg0.81Fe'''0.05Ti0.00Al0.12Si1.92O6	49.4577	0.0533295	2.55978	1.56727	0	27.3456	0	14.0511	4.83617	0.129081	0	0
2000	968	0.023734	0.051027	-258.413	0.006822	0.026758	cpx	Na0.01Ca0.20Fe''0.89Mg0.81Fe'''0.05Ti0.00Al0.12Si1.92O6	49.4409	0.0521944	2.55153	1.56847	0	27.4364	0	13.9965	4.82493	0.129041	0	0
2000	967	0.02346	0.050408	-255.229	0.006741	0.026437	cpx	Na0.01Ca0.20Fe''0.90Mg0.81Fe'''0.05Ti0.00Al0.12Si1.92O6	49.4241	0.0510744	2.54328	1.56968	0	27.5274	0	13.9418	4.81369	0.128999	0	0
2000	966	0.02319	0.049796	-252.079	0.00666	0.026119	cpx	Na0.01Ca0.20Fe''0.90Mg0.81Fe'''0.05Ti0.00Al0.12Si1.92O6	49.4072	0.0499694	2.53503	1.57089	0	27.6186	0	13.887	4.80245	0.128955	0	0
2000	965	0.022922	0.04919	-248.963	0.006581	0.025804	cpx	Na0.01Ca0.20Fe''0.90Mg0.80Fe'''0.05Ti0.00Al0.12Si1.92O6	49.3902	0.0488793	2.52679	1.5721	0	27.7099	0	13.832	4.79121	0.12891	0	0
2000	964	0.022657	0.048591	-245.879	0.006502	0.025493	cpx	Na0.01Ca0.20Fe''0.91Mg0.80Fe'''0.05Ti0.00Al0.12Si1.92O6	49.3732	0.047804	2.51854	1.57331	0	27.8013	0	13.777	4.77997	0.128863	0	0
2000	963	0.022394	0.047997	-242.829	0.006424	0.025185	cpx	Na0.01Ca0.20Fe''0.91Mg0.80Fe'''0.05Ti0.00Al0.12Si1.92O6	49.3561	0.0467434	2.5103	1.57451	0	27.893	0	13.7218	4.76872	0.128815	0	0
2000	962	0.022134	0.04741	-239.81	0.006347	0.02488	cpx	Na0.01Ca0.20Fe''0.91Mg0.79Fe'''0.05Ti0.00Al0.11Si1.92O6	49.339	0.0456975	2.50206	1.57572	0	27.9847	0	13.6665	4.75748	0.128765	0	0
2000	961	0.021877	0.046829	-236.821	0.006271	0.024578	cpx	Na0.01Ca0.20Fe''0.92Mg0.79Fe'''0.05Ti0.00Al0.11Si1.92O6	49.3219	0.0446661	2.49383	1.57692	0	28.0766	0	13.6112	4.74624	0.128714	0	0
2000	960	0.021622	0.046254	-233.863	0.006195	0.024279	cpx	Na0.01Ca0.20Fe''0.92Mg0.79Fe'''0.05Ti0.00Al0.11Si1.92O6	49.3047	0.0436492	2.48559	1.57812	0	28.1686	0	13.5557	4.73501	0.128661	0	0
2000	959	0.021369	0.045684	-230.935	0.006121	0.023982	cpx	Na0.01Ca0.20Fe''0.92Mg0.79Fe'''0.05Ti0.00Al0.11Si1.92O6	49.2874	0.0426466	2.47735	1.57932	0	28.2608	0	13.5001	4.72377	0.128606	0	0
2000	958	0.021118	0.04512	-228.035	0.006046	0.023689	cpx	Na0.01Ca0.20Fe''0.93Mg0.78Fe'''0.05Ti0.00Al0.11Si1.92O6	49.2701	0.0416584	2.46911	1.58051	0	28.3531	0	13.4445	4.71254	0.12855	0	0
2000	957	0.02087	0.044561	-225.163	0.005973	0.023398	cpx	Na0.01Ca0.20Fe''0.93Mg0.78Fe'''0.05Ti0.00Al0.11Si1.92O6	49.2528	0.0406844	2.46087	1.58169	0	28.4455	0	13.3887	4.70132	0.128492	0	0
2000	956	0.020624	0.044007	-222.318	0.0059	0.02311	cpx	Na0.01Ca0.20Fe''0.93Mg0.78Fe'''0.05Ti0.00Al0.11Si1.92O6	49.2354	0.0397244	2.45263	1.58287	0	28.538	0	13.3329	4.6901	0.128433	0	0
2000	955	0.02038	0.043458	-219.5	0.005828	0.022825	cpx	Na0.01Ca0.20Fe''0.94Mg0.77Fe'''0.05Ti0.00Al0.11Si1.92O6	49.2179	0.0387785	2.44439	1.58405	0	28.6306	0	13.277	4.67889	0.128372	0	0
2000	954	0.020137	0.042914	-216.708	0.005756	0.022542	cpx	Na0.01Ca0.20Fe''0.94Mg0.77Fe'''0.05Ti0.00Al0.11Si1.92O6	49.2005	0.0378466	2.43614	1.58521	0	28.7233	0	13.221	4.66769	0.12831	0	0
2000	953	0.019897	0.042375	-213.941	0.005685	0.022262	cpx	Na0.01Ca0.20Fe''0.94Mg0.77Fe'''0.05Ti0.00Al0.11Si1.92O6	49.183	0.0369286	2.42789	1.58637	0	28.8161	0	13.165	4.65649	0.128246	0	0
2000	952	0.019659	0.041841	-211.199	0.005615	0.021984	cpx	Na0.01Ca0.19Fe''0.95Mg0.76Fe'''0.05Ti0.00Al0.11Si1.92O6	49.1655	0.0360243	2.41964	1.58752	0	28.909	0	13.1088	4.6453	0.128181	0	0
2000	951	0.019423	0.041311	-208.481	0.005545	0.021708	cpx	Na0.01Ca0.19Fe''0.95Mg0.76Fe'''0.05Ti0.00Al0.11Si1.92O6	49.1479	0.0351338	2.41138	1.58865	0	29.002	0	13.0527	4.63413	0.128114	0	0
2000	950	0.019188	0.040786	-205.786	0.005476	0.021435	cpx	Na0.01Ca0.19Fe''0.95Mg0.76Fe'''0.05Ti0.00Al0.11Si1.92O6	49.1303	0.0342568	2.40312	1.58978	0	29.0951	0	12.9964	4.62296	0.128045	0	0
2000	949	0.018955	0.040265	-203.114	0.005408	0.021164	cpx	Na0.01Ca0.19Fe''0.96Mg0.76Fe'''0.05Ti0.00Al0.11Si1.93O6	49.1127	0.0333935	2.39485	1.59089	0	29.1882	0	12.9401	4.6118	0.127975	0	0
olivine_0	thermodynamic	data	and	composition:
Pressure	Temperature	mass	S	H	V	Cp	formula	SiO2	TiO2	Al2O3	Fe2O3	Cr2O3	FeO	MnO	MgO	CaO	Na2O	K2O	H2O
2000	948	0.075237	0.153265	-615.235	0.019102	0.076774	(Ca0.01Mg0.28Fe''0.66Mn0.05Co0.00Ni0.00)2SiO4	32.3163	0	0	0	0	51.3852	3.87905	12.0851	0.334282	0	0	0
2000	947	0.026161	0.053249	-213.572	0.006637	0.026675	(Ca0.01Mg0.28Fe''0.67Mn0.05Co0.00Ni0.00)2SiO4	32.2917	0	0	0	0	51.5051	3.89068	11.9783	0.334143	0	0	0
2000	946	0.025961	0.052802	-211.599	0.006582	0.026453	(Ca0.01Mg0.28Fe''0.67Mn0.05Co0.00Ni0.00)2SiO4	32.2672	0	0	0	0	51.6244	3.90223	11.8722	0.333998	0	0	0
2000	945	0.025763	0.052358	-209.647	0.006528	0.026232	(Ca0.01Mg0.28Fe''0.67Mn0.05Co0.00Ni0.00)2SiO4	32.2429	0	0	0	0	51.7429	3.9137	11.7667	0.333848	0	0	0
2000	944	0.025567	0.051918	-207.714	0.006474	0.026013	(Ca0.01Mg0.28Fe''0.67Mn0.05Co0.00Ni0.00)2SiO4	32.2188	0	0	0	0	51.8606	3.92509	11.6618	0.333693	0	0	0
2000	943	0.025372	0.051482	-205.8	0.00642	0.025796	(Ca0.01Mg0.27Fe''0.68Mn0.05Co0.00Ni0.00)2SiO4	32.1948	0	0	0	0	51.9777	3.9364	11.5577	0.333532	0	0	0
2000	942	0.025179	0.05105	-203.906	0.006367	0.025581	(Ca0.01Mg0.27Fe''0.68Mn0.05Co0.00Ni0.00)2SiO4	32.1709	0	0	0	0	52.094	3.94762	11.4541	0.333366	0	0	0
2000	941	0.024987	0.050621	-202.03	0.006314	0.025368	(Ca0.01Mg0.27Fe''0.68Mn0.05Co0.00Ni0.00)2SiO4	32.1472	0	0	0	0	52.2095	3.95877	11.3513	0.333194	0	0	0
2000	940	0.024797	0.050196	-200.173	0.006262	0.025157	(Ca0.01Mg0.27Fe''0.68Mn0.05Co0.00Ni0.00)2SiO4	32.1236	0	0	0	0	52.3244	3.96984	11.2491	0.333018	0	0	0
2000	939	0.024607	0.049774	-198.335	0.006211	0.024947	(Ca0.01Mg0.26Fe''0.68Mn0.05Co0.00Ni0.00)2SiO4	32.1002	0	0	0	0	52.4385	3.98083	11.1476	0.332836	0	0	0
2000	938	0.02442	0.049356	-196.514	0.006159	0.024739	(Ca0.01Mg0.26Fe''0.69Mn0.05Co0.00Ni0.00)2SiO4	32.077	0	0	0	0	52.5519	3.99175	11.0467	0.332649	0	0	0
2000	937	0.024233	0.048941	-194.712	0.006108	0.024533	(Ca0.01Mg0.26Fe''0.69Mn0.05Co0.00Ni0.00)2SiO4	32.0539	0	0	0	0	52.6645	4.00259	10.9465	0.332456	0	0	0
2000	936	0.024049	0.048529	-192.927	0.006058	0.024329	(Ca0.01Mg0.26Fe''0.69Mn0.05Co0.00Ni0.00)2SiO4	32.031	0	0	0	0	52.7765	4.01335	10.847	0.332259	0	0	0
2000	935	0.023865	0.048121	-191.16	0.006008	0.024126	(Ca0.01Mg0.26Fe''0.69Mn0.05Co0.00Ni0.00)2SiO4	32.0082	0	0	0	0	52.8877	4.02404	10.7481	0.332057	0	0	0
2000	934	0.023683	0.047717	-189.41	0.005958	0.023925	(Ca0.01Mg0.25Fe''0.69Mn0.05Co0.00Ni0.00)2SiO4	31.9855	0	0	0	0	52.9981	4.03466	10.6499	0.33185	0	0	0
2000	933	0.023502	0.047315	-187.676	0.005909	0.023726	(Ca0.01Mg0.25Fe''0.69Mn0.05Co0.00Ni0.00)2SiO4	31.963	0	0	0	0	53.1078	4.04521	10.5523	0.331638	0	0	0
2000	932	0.023322	0.046917	-185.96	0.00586	0.023528	(Ca0.01Mg0.25Fe''0.70Mn0.05Co0.00Ni0.00)2SiO4	31.9407	0	0	0	0	53.2168	4.05568	10.4554	0.331421	0	0	0
2000	931	0.023144	0.046522	-184.26	0.005812	0.023333	(Ca0.01Mg0.25Fe''0.70Mn0.05Co0.00Ni0.00)2SiO4	31.9185	0	0	0	0	53.3251	4.06608	10.3591	0.331199	0	0	0
2000	930	0.022966	0.04613	-182.577	0.005764	0.023138	(Ca0.01Mg0.25Fe''0.70Mn0.05Co0.00Ni0.00)2SiO4	31.8965	0	0	0	0	53.4326	4.07641	10.2636	0.330973	0	0	0
2000	929	0.022791	0.045741	-180.909	0.005716	0.022945	(Ca0.01Mg0.24Fe''0.70Mn0.05Co0.00Ni0.00)2SiO4	31.8746	0	0	0	0	53.5394	4.08668	10.1686	0.330742	0	0	0
2000	928	0.022616	0.045356	-179.258	0.005669	0.022754	(Ca0.01Mg0.24Fe''0.70Mn0.05Co0.00Ni0.00)2SiO4	31.8528	0	0	0	0	53.6455	4.09687	10.0743	0.330507	0	0	0
2000	927	0.022442	0.044973	-177.622	0.005622	0.022565	(Ca0.01Mg0.24Fe''0.71Mn0.05Co0.00Ni0.00)2SiO4	31.8312	0	0	0	0	53.7508	4.107	9.98068	0.330267	0	0	0
2000	926	0.02227	0.044594	-176.002	0.005575	0.022377	(Ca0.01Mg0.24Fe''0.71Mn0.05Co0.00Ni0.00)2SiO4	31.8098	0	0	0	0	53.8554	4.11706	9.88769	0.330022	0	0	0
2000	925	0.022099	0.044217	-174.397	0.005529	0.02219	(Ca0.01Mg0.24Fe''0.71Mn0.05Co0.00Ni0.00)2SiO4	31.7885	0	0	0	0	53.9593	4.12706	9.79535	0.329774	0	0	0
2000	924	0.021929	0.043844	-172.808	0.005484	0.022005	(Ca0.01Mg0.23Fe''0.71Mn0.06Co0.00Ni0.00)2SiO4	31.7674	0	0	0	0	54.0625	4.137	9.70365	0.329521	0	0	0
2000	923	0.021761	0.043473	-171.234	0.005438	0.021821	(Ca0.01Mg0.23Fe''0.71Mn0.06Co0.00Ni0.00)2SiO4	31.7464	0	0	0	0	54.1649	4.14687	9.61259	0.329263	0	0	0
2000	922	0.021593	0.043106	-169.674	0.005393	0.021639	(Ca0.01Mg0.23Fe''0.72Mn0.06Co0.00Ni0.00)2SiO4	31.7255	0	0	0	0	54.2666	4.15668	9.52217	0.329002	0	0	0
2000	921	0.021427	0.042741	-168.13	0.005349	0.021459	(Ca0.01Mg0.23Fe''0.72Mn0.06Co0.00Ni0.00)2SiO4	31.7048	0	0	0	0	54.3676	4.16642	9.43239	0.328737	0	0	0
2000	920	0.021262	0.042379	-166.6	0.005304	0.02128	(Ca0.01Mg0.23Fe''0.72Mn0.06Co0.00Ni0.00)2SiO4	31.6843	0	0	0	0	54.4679	4.17611	9.34325	0.328467	0	0	0
2000	919	0.021098	0.042021	-165.084	0.00526	0.021102	(Ca0.01Mg0.22Fe''0.72Mn0.06Co0.00Ni0.00)2SiO4	31.6639	0	0	0	0	54.5675	4.18574	9.25474	0.328194	0	0	0
2000	918	0.020935	0.041664	-163.583	0.005217	0.020926	(Ca0.01Mg0.22Fe''0.72Mn0.06Co0.00Ni0.00)2SiO4	31.6436	0	0	0	0	54.6663	4.19532	9.16686	0.327917	0	0	0
2000	917	0.020774	0.041311	-162.096	0.005174	0.020751	(Ca0.01Mg0.22Fe''0.72Mn0.06Co0.00Ni0.00)2SiO4	31.6235	0	0	0	0	54.7645	4.20483	9.0796	0.327635	0	0	0
2000	916	0.020613	0.040961	-160.623	0.005131	0.020578	(Ca0.01Mg0.22Fe''0.73Mn0.06Co0.00Ni0.00)2SiO4	31.6035	0	0	0	0	54.8619	4.21429	8.99298	0.327351	0	0	0
2000	915	0.020454	0.040613	-159.164	0.005088	0.020406	(Ca0.01Mg0.22Fe''0.73Mn0.06Co0.00Ni0.00)2SiO4	31.5837	0	0	0	0	54.9586	4.2237	8.90698	0.327062	0	0	0
2000	914	0.020295	0.040268	-157.718	0.005046	0.020235	(Ca0.01Mg0.21Fe''0.73Mn0.06Co0.00Ni0.00)2SiO4	31.564	0	0	0	0	55.0546	4.23305	8.82159	0.32677	0	0	0
2000	913	0.020138	0.039926	-156.286	0.005004	0.020066	(Ca0.01Mg0.21Fe''0.73Mn0.06Co0.00Ni0.00)2SiO4	31.5444	0	0	0	0	55.1499	4.24235	8.73682	0.326475	0	0	0
2000	912	0.019982	0.039587	-154.868	0.004963	0.019898	(Ca0.01Mg0.21Fe''0.73Mn0.06Co0.00Ni0.00)2SiO4	31.525	0	0	0	0	55.2445	4.2516	8.65267	0.326176	0	0	0
2000	911	0.019827	0.03925	-153.463	0.004921	0.019731	(Ca0.01Mg0.21Fe''0.73Mn0.06Co0.00Ni0.00)2SiO4	31.5057	0	0	0	0	55.3385	4.2608	8.56913	0.325874	0	0	0
2000	910	0.019673	0.038916	-152.071	0.004881	0.019566	(Ca0.01Mg0.21Fe''0.74Mn0.06Co0.00Ni0.00)2SiO4	31.4866	0	0	0	0	55.4317	4.26995	8.4862	0.325568	0	0	0
2000	909	0.019521	0.038585	-150.693	0.00484	0.019402	(Ca0.01Mg0.20Fe''0.74Mn0.06Co0.00Ni0.00)2SiO4	31.4676	0	0	0	0	55.5242	4.27905	8.40387	0.325259	0	0	0
2000	908	0.019369	0.038256	-149.327	0.0048	0.01924	(Ca0.01Mg0.20Fe''0.74Mn0.06Co0.00Ni0.00)2SiO4	31.4488	0	0	0	0	55.616	4.2881	8.32214	0.324947	0	0	0
2000	907	0.019218	0.03793	-147.975	0.00476	0.019079	(Ca0.01Mg0.20Fe''0.74Mn0.06Co0.00Ni0.00)2SiO4	31.4301	0	0	0	0	55.7072	4.29711	8.24101	0.324632	0	0	0
2000	906	0.019069	0.037607	-146.635	0.00472	0.018919	(Ca0.01Mg0.20Fe''0.74Mn0.06Co0.00Ni0.00)2SiO4	31.4115	0	0	0	0	55.7976	4.30607	8.16048	0.324314	0	0	0
2000	905	0.01892	0.037286	-145.308	0.004681	0.01876	(Ca0.01Mg0.20Fe''0.74Mn0.06Co0.00Ni0.00)2SiO4	31.3931	0	0	0	0	55.8874	4.31499	8.08054	0.323994	0	0	0
2000	904	0.018773	0.036968	-143.994	0.004642	0.018603	(Ca0.01Mg0.20Fe''0.75Mn0.06Co0.00Ni0.00)2SiO4	31.3748	0	0	0	0	55.9765	4.32387	8.00118	0.32367	0	0	0
2000	903	0.018627	0.036652	-142.692	0.004604	0.018447	(Ca0.01Mg0.19Fe''0.75Mn0.06Co0.00Ni0.00)2SiO4	31.3566	0	0	0	0	56.065	4.3327	7.92241	0.323343	0	0	0
2000	902	0.018481	0.036339	-141.402	0.004566	0.018293	(Ca0.01Mg0.19Fe''0.75Mn0.06Co0.00Ni0.00)2SiO4	31.3385	0	0	0	0	56.1527	4.3415	7.84423	0.323014	0	0	0
2000	901	0.018337	0.036029	-140.125	0.004528	0.018139	(Ca0.01Mg0.19Fe''0.75Mn0.06Co0.00Ni0.00)2SiO4	31.3206	0	0	0	0	56.2398	4.35025	7.76662	0.322683	0	0	0
2000	900	0.018194	0.035721	-138.86	0.00449	0.017987	(Ca0.01Mg0.19Fe''0.75Mn0.06Co0.00Ni0.00)2SiO4	31.3029	0	0	0	0	56.3262	4.35897	7.68958	0.322348	0	0	0
spinel_0	thermodynamic	data	and	composition:
Pressure	Temperature	mass	S	H	V	Cp	formula	SiO2	TiO2	Al2O3	Fe2O3	Cr2O3	FeO	MnO	MgO	CaO	Na2O	K2O	H2O
2000	1033	0.000638	0.001299	-3.59183	0.000134	0.000586	Fe''0.97Mg0.18Fe'''1.05Al0.31Cr0.35Ti0.14O4	0	5.3792	7.47478	38.9755	12.4257	32.4156	0	3.32921	0	0	0	0
2000	1032	0.001683	0.003426	-9.4423	0.000354	0.001544	Fe''0.97Mg0.18Fe'''1.05Al0.31Cr0.34Ti0.15O4	0	5.52232	7.3477	39.2121	12.0467	32.5818	0	3.2893	0	0	0	0
2000	1031	0.002078	0.004228	-11.6189	0.000437	0.001905	Fe''0.98Mg0.17Fe'''1.06Al0.30Cr0.33Ti0.15O4	0	5.66884	7.22122	39.4433	11.6662	32.7505	0	3.24993	0	0	0	0
2000	1030	0.002101	0.004273	-11.7085	0.000442	0.001926	Fe''0.99Mg0.17Fe'''1.07Al0.30Cr0.32Ti0.16O4	0	5.8188	7.09538	39.6687	11.2843	32.9217	0	3.2111	0	0	0	0
2000	1029	0.002125	0.00432	-11.8048	0.000447	0.001947	Fe''0.99Mg0.17Fe'''1.08Al0.29Cr0.31Ti0.16O4	0	5.97216	6.97028	39.888	10.9014	33.0953	0	3.17282	0	0	0	0
2000	1028	0.00215	0.00437	-11.9077	0.000452	0.00197	Fe''1.00Mg0.17Fe'''1.08Al0.29Cr0.30Ti0.17O4	0	6.1289	6.84601	40.101	10.5178	33.2713	0	3.13509	0	0	0	0
2000	1027	0.002177	0.004423	-12.0177	0.000457	0.001993	Fe''1.00Mg0.17Fe'''1.09Al0.28Cr0.29Ti0.17O4	0	6.28897	6.72265	40.3072	10.1336	33.4497	0	3.09792	0	0	0	0
2000	1026	0.002205	0.004478	-12.1349	0.000463	0.002018	Fe''1.01Mg0.16Fe'''1.10Al0.28Cr0.28Ti0.17O4	0	6.4523	6.60029	40.5065	9.7492	33.6304	0	3.06131	0	0	0	0
2000	1025	0.002235	0.004536	-12.2596	0.000469	0.002044	Fe''1.02Mg0.16Fe'''1.10Al0.27Cr0.27Ti0.18O4	0	6.61882	6.47901	40.6986	9.36488	33.8134	0	3.02526	0	0	0	0
2000	1024	0.002265	0.004597	-12.3921	0.000475	0.002072	Fe''1.02Mg0.16Fe'''1.11Al0.27Cr0.26Ti0.18O4	0	6.78846	6.35889	40.8832	8.98091	33.9987	0	2.98977	0	0	0	0
2000	1023	0.002298	0.004661	-12.5327	0.000482	0.002101	Fe''1.03Mg0.16Fe'''1.11Al0.26Cr0.24Ti0.19O4	0	6.96113	6.24	41.0603	8.59757	34.1862	0	2.95483	0	0	0	0
2000	1022	0.002332	0.004728	-12.6816	0.000489	0.002131	Fe''1.04Mg0.16Fe'''1.12Al0.26Cr0.23Ti0.19O4	0	7.13672	6.12242	41.2295	8.21512	34.3758	0	2.92046	0	0	0	0
2000	1021	0.002367	0.004798	-12.8393	0.000496	0.002163	Fe''1.04Mg0.16Fe'''1.12Al0.26Cr0.22Ti0.20O4	0	7.31512	6.0062	41.3908	7.83383	34.5674	0	2.88663	0	0	0	0
2000	1020	0.002404	0.004871	-13.0059	0.000504	0.002197	Fe''1.05Mg0.15Fe'''1.13Al0.25Cr0.21Ti0.20O4	0	7.49622	5.89142	41.5442	7.45395	34.7609	0	2.85336	0	0	0	0
2000	1019	0.002443	0.004948	-13.1819	0.000512	0.002232	Fe''1.06Mg0.15Fe'''1.13Al0.25Cr0.20Ti0.21O4	0	7.67988	5.77813	41.6894	7.07575	34.9563	0	2.82063	0	0	0	0
2000	1018	0.002484	0.005028	-13.3678	0.00052	0.002269	Fe''1.06Mg0.15Fe'''1.14Al0.24Cr0.19Ti0.21O4	0	7.86596	5.66639	41.8264	6.69946	35.1533	0	2.78843	0	0	0	0
2000	1017	0.002527	0.005113	-13.5638	0.000529	0.002307	Fe''1.07Mg0.15Fe'''1.14Al0.24Cr0.18Ti0.22O4	0	8.0543	5.55625	41.9553	6.32533	35.352	0	2.75677	0	0	0	0
2000	1016	0.002572	0.005201	-13.7707	0.000538	0.002348	Fe''1.08Mg0.15Fe'''1.15Al0.23Cr0.17Ti0.22O4	0	8.24476	5.44776	42.076	5.95357	35.5522	0	2.72563	0	0	0	0
2000	1015	0.002619	0.005293	-13.989	0.000548	0.00239	Fe''1.08Mg0.15Fe'''1.15Al0.23Cr0.16Ti0.23O4	0	8.43717	5.34096	42.1887	5.58442	35.7538	0	2.695	0	0	0	0
2000	1014	0.002668	0.00539	-14.2195	0.000558	0.002435	Fe''1.09Mg0.14Fe'''1.16Al0.22Cr0.15Ti0.24O4	0	8.63134	5.23589	42.2933	5.21807	35.9565	0	2.66487	0	0	0	0
2000	1013	0.00272	0.005492	-14.4631	0.000569	0.002481	Fe''1.10Mg0.14Fe'''1.16Al0.22Cr0.14Ti0.24O4	0	8.82711	5.13259	42.3899	4.85474	36.1604	0	2.63524	0	0	0	0
2000	1012	0.002774	0.005599	-14.721	0.00058	0.002531	Fe''1.11Mg0.14Fe'''1.16Al0.22Cr0.13Ti0.25O4	0	9.02428	5.0311	42.4788	4.4946	36.3651	0	2.6061	0	0	0	0
2000	1011	0.002831	0.005712	-14.9946	0.000592	0.002583	Fe''1.11Mg0.14Fe'''1.17Al0.21Cr0.12Ti0.25O4	0	9.22265	4.93142	42.56	4.13785	36.5707	0	2.57743	0	0	0	0
2000	1010	0.002892	0.005832	-15.2861	0.000605	0.002638	Fe''1.12Mg0.14Fe'''1.17Al0.21Cr0.11Ti0.26O4	0	9.42202	4.83361	42.6337	3.78465	36.7768	0	2.54921	0	0	0	0
2000	1009	0.002957	0.005959	-15.5983	0.000618	0.002697	Fe''1.13Mg0.14Fe'''1.17Al0.20Cr0.10Ti0.26O4	0	9.62219	4.73767	42.7001	3.43518	36.9834	0	2.52145	0	0	0	0
2000	1008	0.003026	0.006096	-15.935	0.000632	0.00276	Fe''1.13Mg0.14Fe'''1.17Al0.20Cr0.09Ti0.27O4	0	9.82291	4.64362	42.7595	3.08961	37.1902	0	2.49413	0	0	0	0
2000	1007	0.003102	0.006244	-16.302	0.000648	0.002828	Fe''1.14Mg0.13Fe'''1.18Al0.20Cr0.08Ti0.27O4	0	10.024	4.5515	42.8122	2.7481	37.397	0	2.46723	0	0	0	0
2000	1006	0.003184	0.006407	-16.7083	0.000665	0.002903	Fe''1.15Mg0.13Fe'''1.18Al0.19Cr0.07Ti0.28O4	0	10.2251	4.46132	42.8583	2.41084	37.6037	0	2.44075	0	0	0	0
2000	1005	0.003277	0.00659	-17.1679	0.000685	0.002988	Fe''1.15Mg0.13Fe'''1.18Al0.19Cr0.06Ti0.29O4	0	10.426	4.3731	42.8982	2.07801	37.81	0	2.41467	0	0	0	0
2000	1004	0.003385	0.006802	-17.7049	0.000707	0.003086	Fe''1.16Mg0.13Fe'''1.18Al0.18Cr0.05Ti0.29O4	0	10.6263	4.28688	42.9324	1.74988	38.0156	0	2.38899	0	0	0	0
2000	1003	0.003517	0.007062	-18.3637	0.000734	0.003205	Fe''1.17Mg0.13Fe'''1.18Al0.18Cr0.04Ti0.30O4	0	10.8256	4.20271	42.9611	1.42677	38.22	0	2.36368	0	0	0	0
2000	1002	0.003689	0.007403	-19.2355	0.00077	0.003362	Fe''1.18Mg0.13Fe'''1.18Al0.18Cr0.03Ti0.30O4	0	11.0233	4.1207	42.9852	1.10925	38.4229	0	2.33874	0	0	0	0
2000	1001	0.003945	0.00791	-20.5401	0.000823	0.003595	Fe''1.18Mg0.13Fe'''1.18Al0.17Cr0.02Ti0.31O4	0	11.218	4.04106	43.0055	0.798351	38.6229	0	2.31416	0	0	0	0
2000	1000	0.004416	0.008848	-22.9618	0.000922	0.004024	Fe''1.19Mg0.13Fe'''1.19Al0.17Cr0.01Ti0.31O4	0	11.4071	3.96434	43.024	0.496764	38.8179	0	2.28994	0	0	0	0
2000	998	0.015545	0.03109	-80.6236	0.003243	0.014164	Fe''1.20Mg0.12Fe'''1.19Al0.17Cr0.00Ti0.32O4	0	11.6886	3.837	43.1094	0	39.1222	0	2.24272	0	0	0	0
2000	997	0.02793	0.055822	-144.633	0.005825	0.025442	Fe''1.20Mg0.12Fe'''1.20Al0.17Cr0.00Ti0.32O4	0	11.5849	3.82924	43.3066	0	39.0589	0	2.22032	0	0	0	0
2000	996	0.027623	0.055172	-142.826	0.005759	0.025157	Fe''1.20Mg0.12Fe'''1.20Al0.17Cr0.00Ti0.32O4	0	11.4811	3.82159	43.504	0	38.9952	0	2.19815	0	0	0	0
2000	995	0.027322	0.054536	-141.056	0.005694	0.024877	Fe''1.19Mg0.12Fe'''1.21Al0.16Cr0.00Ti0.31O4	0	11.3771	3.81405	43.7017	0	38.9309	0	2.17621	0	0	0	0
2000	994	0.027028	0.053912	-139.323	0.005631	0.024604	Fe''1.19Mg0.12Fe'''1.21Al0.16Cr0.00Ti0.31O4	0	11.273	3.80662	43.8997	0	38.8662	0	2.15451	0	0	0	0
2000	993	0.026739	0.053302	-137.626	0.005568	0.024335	Fe''1.19Mg0.12Fe'''1.22Al0.16Cr0.00Ti0.31O4	0	11.1687	3.7993	44.098	0	38.801	0	2.13303	0	0	0	0
2000	992	0.026456	0.052703	-135.964	0.005508	0.024073	Fe''1.19Mg0.12Fe'''1.22Al0.16Cr0.00Ti0.31O4	0	11.0643	3.7921	44.2965	0	38.7353	0	2.11178	0	0	0	0
2000	991	0.026179	0.052116	-134.337	0.005448	0.023815	Fe''1.19Mg0.11Fe'''1.23Al0.16Cr0.00Ti0.30O4	0	10.9598	3.785	44.4952	0	38.6692	0	2.09075	0	0	0	0
2000	990	0.025907	0.051541	-132.742	0.005389	0.023563	Fe''1.19Mg0.11Fe'''1.24Al0.16Cr0.00Ti0.30O4	0	10.8552	3.77801	44.6942	0	38.6027	0	2.06995	0	0	0	0
2000	989	0.025641	0.050978	-131.181	0.005332	0.023315	Fe''1.18Mg0.11Fe'''1.24Al0.16Cr0.00Ti0.30O4	0	10.7504	3.77112	44.8934	0	38.5358	0	2.04936	0	0	0	0
2000	988	0.02538	0.050425	-129.651	0.005276	0.023073	Fe''1.18Mg0.11Fe'''1.25Al0.16Cr0.00Ti0.29O4	0	10.6455	3.76435	45.0928	0	38.4684	0	2.02899	0	0	0	0
2000	987	0.025124	0.049884	-128.152	0.005221	0.022835	Fe''1.18Mg0.11Fe'''1.25Al0.16Cr0.00Ti0.29O4	0	10.5405	3.75768	45.2924	0	38.4006	0	2.00884	0	0	0	0
2000	986	0.024873	0.049353	-126.684	0.005167	0.022603	Fe''1.18Mg0.11Fe'''1.26Al0.16Cr0.00Ti0.29O4	0	10.4354	3.75111	45.4923	0	38.3324	0	1.98889	0	0	0	0
2000	985	0.024628	0.048833	-125.245	0.005114	0.022374	Fe''1.18Mg0.11Fe'''1.27Al0.16Cr0.00Ti0.29O4	0	10.3302	3.74465	45.6923	0	38.2638	0	1.96916	0	0	0	0
2000	984	0.024387	0.048323	-123.836	0.005062	0.022151	Fe''1.18Mg0.11Fe'''1.27Al0.16Cr0.00Ti0.28O4	0	10.2248	3.73829	45.8925	0	38.1947	0	1.94964	0	0	0	0
2000	983	0.02415	0.047823	-122.455	0.005011	0.021931	Fe''1.17Mg0.11Fe'''1.28Al0.16Cr0.00Ti0.28O4	0	10.1194	3.73204	46.0929	0	38.1254	0	1.93032	0	0	0	0
2000	982	0.023919	0.047333	-121.101	0.004962	0.021717	Fe''1.17Mg0.10Fe'''1.28Al0.16Cr0.00Ti0.28O4	0	10.0139	3.72588	46.2934	0	38.0556	0	1.9112	0	0	0	0
2000	981	0.023692	0.046852	-119.775	0.004913	0.021506	Fe''1.17Mg0.10Fe'''1.29Al0.16Cr0.00Ti0.27O4	0	9.90835	3.71983	46.4941	0	37.9854	0	1.89229	0	0	0	0
2000	980	0.023469	0.046381	-118.476	0.004865	0.0213	Fe''1.17Mg0.10Fe'''1.30Al0.16Cr0.00Ti0.27O4	0	9.80269	3.71388	46.6949	0	37.9149	0	1.87358	0	0	0	0
2000	979	0.023251	0.045919	-117.203	0.004818	0.021097	Fe''1.17Mg0.10Fe'''1.30Al0.16Cr0.00Ti0.27O4	0	9.69695	3.70802	46.8959	0	37.8441	0	1.85506	0	0	0	0
2000	978	0.023037	0.045466	-115.955	0.004772	0.020899	Fe''1.17Mg0.10Fe'''1.31Al0.16Cr0.00Ti0.27O4	0	9.59113	3.70227	47.097	0	37.7728	0	1.83674	0	0	0	0
2000	977	0.022828	0.045022	-114.733	0.004727	0.020704	Fe''1.16Mg0.10Fe'''1.31Al0.16Cr0.00Ti0.26O4	0	9.48526	3.69661	47.2982	0	37.7013	0	1.81861	0	0	0	0
2000	976	0.022622	0.044587	-113.534	0.004683	0.020514	Fe''1.16Mg0.10Fe'''1.32Al0.16Cr0.00Ti0.26O4	0	9.37932	3.69105	47.4996	0	37.6294	0	1.80068	0	0	0	0
2000	975	0.022421	0.04416	-112.36	0.00464	0.020327	Fe''1.16Mg0.10Fe'''1.32Al0.16Cr0.00Ti0.26O4	0	9.27332	3.68558	47.701	0	37.5572	0	1.78293	0	0	0	0
2000	974	0.022223	0.043742	-111.21	0.004597	0.020144	Fe''1.16Mg0.10Fe'''1.33Al0.16Cr0.00Ti0.25O4	0	9.16727	3.68021	47.9025	0	37.4846	0	1.76537	0	0	0	0
2000	973	0.02203	0.043332	-110.082	0.004556	0.019964	Fe''1.16Mg0.10Fe'''1.34Al0.16Cr0.00Ti0.25O4	0	9.06118	3.67493	48.1041	0	37.4118	0	1.748	0	0	0	0
2000	972	0.02184	0.04293	-108.977	0.004515	0.019788	Fe''1.15Mg0.10Fe'''1.34Al0.16Cr0.00Ti0.25O4	0	8.95505	3.66974	48.3058	0	37.3386	0	1.73081	0	0	0	0
2000	971	0.021654	0.042536	-107.895	0.004475	0.019616	Fe''1.15Mg0.09Fe'''1.35Al0.16Cr0.00Ti0.25O4	0	8.84888	3.66464	48.5075	0	37.2652	0	1.7138	0	0	0	0
2000	970	0.021472	0.042149	-106.834	0.004436	0.019447	Fe''1.15Mg0.09Fe'''1.35Al0.16Cr0.00Ti0.24O4	0	8.74269	3.65964	48.7093	0	37.1914	0	1.69698	0	0	0	0
2000	969	0.021294	0.041771	-105.795	0.004398	0.019282	Fe''1.15Mg0.09Fe'''1.36Al0.16Cr0.00Ti0.24O4	0	8.63647	3.65472	48.9111	0	37.1174	0	1.68033	0	0	0	0
2000	968	0.021119	0.041399	-104.776	0.00436	0.019119	Fe''1.15Mg0.09Fe'''1.37Al0.16Cr0.00Ti0.24O4	0	8.53023	3.64989	49.1129	0	37.0431	0	1.66385	0	0	0	0
2000	967	0.020947	0.041036	-103.779	0.004324	0.018961	Fe''1.14Mg0.09Fe'''1.37Al0.16Cr0.00Ti0.23O4	0	8.42398	3.64514	49.3148	0	36.9686	0	1.64756	0	0	0	0
2000	966	0.020779	0.040679	-102.801	0.004288	0.018805	Fe''1.14Mg0.09Fe'''1.38Al0.16Cr0.00Ti0.23O4	0	8.31773	3.64048	49.5166	0	36.8938	0	1.63143	0	0	0	0
2000	965	0.020615	0.04033	-101.844	0.004252	0.018652	Fe''1.14Mg0.09Fe'''1.38Al0.16Cr0.00Ti0.23O4	0	8.21148	3.6359	49.7184	0	36.8187	0	1.61548	0	0	0	0
2000	964	0.020454	0.039987	-100.906	0.004218	0.018503	Fe''1.14Mg0.09Fe'''1.39Al0.16Cr0.00Ti0.23O4	0	8.10524	3.63141	49.9203	0	36.7434	0	1.59969	0	0	0	0
2000	963	0.020296	0.039652	-99.9872	0.004184	0.018357	Fe''1.14Mg0.09Fe'''1.40Al0.16Cr0.00Ti0.22O4	0	7.99902	3.62699	50.1221	0	36.6679	0	1.58408	0	0	0	0
2000	962	0.020142	0.039324	-99.0875	0.004151	0.018214	Fe''1.13Mg0.09Fe'''1.40Al0.16Cr0.00Ti0.22O4	0	7.89281	3.62265	50.3238	0	36.5921	0	1.56863	0	0	0	0
2000	961	0.019991	0.039002	-98.2065	0.004119	0.018073	Fe''1.13Mg0.09Fe'''1.41Al0.16Cr0.00Ti0.22O4	0	7.78664	3.61839	50.5255	0	36.5162	0	1.55334	0	0	0	0
2000	960	0.019843	0.038687	-97.3438	0.004087	0.017936	Fe''1.13Mg0.08Fe'''1.41Al0.16Cr0.00Ti0.21O4	0	7.68051	3.6142	50.7271	0	36.44	0	1.53822	0	0	0	0
2000	959	0.019698	0.038378	-96.4992	0.004056	0.017802	Fe''1.13Mg0.08Fe'''1.42Al0.16Cr0.00Ti0.21O4	0	7.57442	3.61009	50.9286	0	36.3636	0	1.52325	0	0	0	0
2000	958	0.019556	0.038076	-95.6724	0.004025	0.01767	Fe''1.12Mg0.08Fe'''1.43Al0.16Cr0.00Ti0.21O4	0	7.46839	3.60605	51.13	0	36.2871	0	1.50845	0	0	0	0
2000	957	0.019418	0.03778	-94.8631	0.003996	0.017541	Fe''1.12Mg0.08Fe'''1.43Al0.16Cr0.00Ti0.21O4	0	7.36242	3.60208	51.3313	0	36.2104	0	1.49381	0	0	0	0
2000	956	0.019282	0.03749	-94.0711	0.003967	0.017416	Fe''1.12Mg0.08Fe'''1.44Al0.16Cr0.00Ti0.20O4	0	7.25653	3.59818	51.5324	0	36.1335	0	1.47932	0	0	0	0
2000	955	0.01915	0.037207	-93.2961	0.003938	0.017293	Fe''1.12Mg0.08Fe'''1.44Al0.16Cr0.00Ti0.20O4	0	7.15071	3.59434	51.7335	0	36.0565	0	1.46499	0	0	0	0
2000	954	0.01902	0.03693	-92.5378	0.00391	0.017172	Fe''1.12Mg0.08Fe'''1.45Al0.16Cr0.00Ti0.20O4	0	7.04499	3.59056	51.9343	0	35.9793	0	1.45081	0	0	0	0
2000	953	0.018894	0.036658	-91.7961	0.003883	0.017054	Fe''1.11Mg0.08Fe'''1.46Al0.16Cr0.00Ti0.19O4	0	6.93937	3.58685	52.135	0	35.902	0	1.43679	0	0	0	0
2000	952	0.01877	0.036393	-91.0707	0.003857	0.016939	Fe''1.11Mg0.08Fe'''1.46Al0.16Cr0.00Ti0.19O4	0	6.83385	3.5832	52.3354	0	35.8246	0	1.42292	0	0	0	0
2000	951	0.018649	0.036133	-90.3614	0.003831	0.016827	Fe''1.11Mg0.08Fe'''1.47Al0.16Cr0.00Ti0.19O4	0	6.72847	3.5796	52.5356	0	35.7471	0	1.40919	0	0	0	0
2000	950	0.018531	0.03588	-89.6679	0.003805	0.016717	Fe''1.11Mg0.08Fe'''1.47Al0.16Cr0.00Ti0.18O4	0	6.62321	3.57605	52.7356	0	35.6695	0	1.39562	0	0	0	0
2000	949	0.018416	0.035632	-88.9901	0.003781	0.01661	Fe''1.11Mg0.08Fe'''1.48Al0.16Cr0.00Ti0.18O4	0	6.5181	3.57256	52.9354	0	35.5918	0	1.38219	0	0	0	0
2000	948	0.004468	0.008641	-21.5741	0.000917	0.004029	Fe''1.11Mg0.07Fe'''1.48Al0.15Cr0.00Ti0.18O4	0	6.56338	3.53545	52.875	0	35.6747	0	1.35144	0	0	0	0
2000	947	0.014698	0.028405	-70.8854	0.003016	0.01325	Fe''1.11Mg0.07Fe'''1.48Al0.15Cr0.00Ti0.18O4	0	6.49425	3.5244	53.0143	0	35.6289	0	1.33818	0	0	0	0
2000	946	0.014533	0.028068	-70.0117	0.002981	0.013099	Fe''1.11Mg0.07Fe'''1.49Al0.15Cr0.00Ti0.18O4	0	6.42548	3.51337	53.1529	0	35.5833	0	1.32503	0	0	0	0
2000	945	0.01437	0.027736	-69.1511	0.002947	0.01295	Fe''1.11Mg0.07Fe'''1.49Al0.15Cr0.00Ti0.18O4	0	6.35708	3.50236	53.2908	0	35.5377	0	1.31201	0	0	0	0
2000	944	0.01421	0.027409	-68.3036	0.002913	0.012803	Fe''1.10Mg0.07Fe'''1.50Al0.15Cr0.00Ti0.18O4	0	6.28906	3.49136	53.4281	0	35.4924	0	1.29912	0	0	0	0
2000	943	0.014052	0.027086	-67.4687	0.00288	0.012658	Fe''1.10Mg0.07Fe'''1.50Al0.15Cr0.00Ti0.17O4	0	6.2214	3.48037	53.5647	0	35.4472	0	1.28634	0	0	0	0
2000	942	0.013895	0.026768	-66.6463	0.002847	0.012515	Fe''1.10Mg0.07Fe'''1.50Al0.15Cr0.00Ti0.17O4	0	6.15413	3.4694	53.7006	0	35.4022	0	1.27369	0	0	0	0
2000	941	0.013741	0.026454	-65.8362	0.002815	0.012374	Fe''1.10Mg0.07Fe'''1.51Al0.15Cr0.00Ti0.17O4	0	6.08723	3.45844	53.8358	0	35.3574	0	1.26115	0	0	0	0
2000	940	0.013589	0.026145	-65.0381	0.002783	0.012234	Fe''1.10Mg0.07Fe'''1.51Al0.15Cr0.00Ti0.17O4	0	6.02072	3.44749	53.9704	0	35.3127	0	1.24874	0	0	0	0
2000	939	0.01344	0.02584	-64.2519	0.002752	0.012097	Fe''1.10Mg0.07Fe'''1.52Al0.15Cr0.00Ti0.17O4	0	5.95459	3.43654	54.1042	0	35.2682	0	1.23643	0	0	0	0
2000	938	0.013292	0.02554	-63.4773	0.002721	0.011962	Fe''1.10Mg0.07Fe'''1.52Al0.15Cr0.00Ti0.16O4	0	5.88885	3.42561	54.2374	0	35.2239	0	1.22424	0	0	0	0
2000	937	0.013146	0.025243	-62.7141	0.00269	0.011828	Fe''1.10Mg0.07Fe'''1.52Al0.15Cr0.00Ti0.16O4	0	5.8235	3.41468	54.3698	0	35.1798	0	1.21217	0	0	0	0
2000	936	0.013002	0.024951	-61.9622	0.00266	0.011696	Fe''1.09Mg0.07Fe'''1.53Al0.15Cr0.00Ti0.16O4	0	5.75854	3.40375	54.5016	0	35.1359	0	1.20021	0	0	0	0
2000	935	0.01286	0.024663	-61.2213	0.00263	0.011566	Fe''1.09Mg0.07Fe'''1.53Al0.15Cr0.00Ti0.16O4	0	5.69398	3.39283	54.6327	0	35.0922	0	1.18836	0	0	0	0
2000	934	0.01272	0.024378	-60.4912	0.002601	0.011438	Fe''1.09Mg0.07Fe'''1.54Al0.15Cr0.00Ti0.16O4	0	5.62982	3.38191	54.763	0	35.0487	0	1.17661	0	0	0	0
2000	933	0.012582	0.024098	-59.7717	0.002572	0.011312	Fe''1.09Mg0.06Fe'''1.54Al0.15Cr0.00Ti0.16O4	0	5.56606	3.371	54.8926	0	35.0053	0	1.16498	0	0	0	0
2000	932	0.012445	0.023822	-59.0627	0.002544	0.011187	Fe''1.09Mg0.06Fe'''1.54Al0.15Cr0.00Ti0.15O4	0	5.5027	3.36008	55.0215	0	34.9622	0	1.15345	0	0	0	0
2000	931	0.01231	0.023549	-58.364	0.002516	0.011064	Fe''1.09Mg0.06Fe'''1.55Al0.15Cr0.00Ti0.15O4	0	5.43974	3.34917	55.1497	0	34.9194	0	1.14203	0	0	0	0
2000	930	0.012178	0.02328	-57.6754	0.002488	0.010942	Fe''1.09Mg0.06Fe'''1.55Al0.15Cr0.00Ti0.15O4	0	5.37719	3.33825	55.2771	0	34.8767	0	1.13072	0	0	0	0
2000	929	0.012047	0.023015	-56.9967	0.002461	0.010823	Fe''1.09Mg0.06Fe'''1.56Al0.15Cr0.00Ti0.15O4	0	5.31506	3.32733	55.4039	0	34.8342	0	1.11951	0	0	0	0
2000	928	0.011917	0.022753	-56.3277	0.002434	0.010704	Fe''1.09Mg0.06Fe'''1.56Al0.15Cr0.00Ti0.15O4	0	5.25333	3.31641	55.5298	0	34.792	0	1.1084	0	0	0	0
2000	927	0.011789	0.022495	-55.6683	0.002407	0.010588	Fe''1.08Mg0.06Fe'''1.56Al0.15Cr0.00Ti0.15O4	0	5.19202	3.30549	55.6551	0	34.75	0	1.09739	0	0	0	0
2000	926	0.011663	0.02224	-55.0184	0.002381	0.010473	Fe''1.08Mg0.06Fe'''1.57Al0.14Cr0.00Ti0.14O4	0	5.13113	3.29455	55.7796	0	34.7083	0	1.08649	0	0	0	0
2000	925	0.011539	0.021989	-54.3776	0.002355	0.010359	Fe''1.08Mg0.06Fe'''1.57Al0.14Cr0.00Ti0.14O4	0	5.07066	3.28362	55.9033	0	34.6667	0	1.07568	0	0	0	0
2000	924	0.011416	0.021741	-53.746	0.002329	0.010247	Fe''1.08Mg0.06Fe'''1.57Al0.14Cr0.00Ti0.14O4	0	5.01061	3.27267	56.0263	0	34.6255	0	1.06497	0	0	0	0
2000	923	0.011295	0.021496	-53.1232	0.002304	0.010136	Fe''1.08Mg0.06Fe'''1.58Al0.14Cr0.00Ti0.14O4	0	4.95098	3.26172	56.1485	0	34.5844	0	1.05436	0	0	0	0
2000	922	0.011175	0.021255	-52.5093	0.002279	0.010027	Fe''1.08Mg0.06Fe'''1.58Al0.14Cr0.00Ti0.14O4	0	4.89177	3.25076	56.27	0	34.5436	0	1.04384	0	0	0	0
2000	921	0.011057	0.021017	-51.9039	0.002254	0.009919	Fe''1.08Mg0.06Fe'''1.59Al0.14Cr0.00Ti0.14O4	0	4.833	3.23979	56.3907	0	34.5031	0	1.03342	0	0	0	0
2000	920	0.01094	0.020782	-51.307	0.00223	0.009812	Fe''1.08Mg0.06Fe'''1.59Al0.14Cr0.00Ti0.13O4	0	4.77465	3.22882	56.5107	0	34.4628	0	1.02309	0	0	0	0
2000	919	0.010825	0.02055	-50.7185	0.002206	0.009707	Fe''1.08Mg0.06Fe'''1.59Al0.14Cr0.00Ti0.13O4	0	4.71674	3.21783	56.6298	0	34.4227	0	1.01286	0	0	0	0
2000	918	0.010711	0.020321	-50.1381	0.002182	0.009604	Fe''1.08Mg0.06Fe'''1.60Al0.14Cr0.00Ti0.13O4	0	4.65926	3.20682	56.7482	0	34.383	0	1.00272	0	0	0	0
2000	917	0.010599	0.020096	-49.5657	0.002159	0.009501	Fe''1.07Mg0.06Fe'''1.60Al0.14Cr0.00Ti0.13O4	0	4.60221	3.19581	56.8659	0	34.3434	0	0.992669	0	0	0	0
2000	916	0.010488	0.019873	-49.0012	0.002136	0.0094	Fe''1.07Mg0.05Fe'''1.60Al0.14Cr0.00Ti0.13O4	0	4.54561	3.18478	56.9827	0	34.3042	0	0.982708	0	0	0	0
2000	915	0.010379	0.019653	-48.4445	0.002113	0.0093	Fe''1.07Mg0.05Fe'''1.61Al0.14Cr0.00Ti0.13O4	0	4.48944	3.17374	57.0988	0	34.2652	0	0.972837	0	0	0	0
2000	914	0.010271	0.019436	-47.8953	0.002091	0.009202	Fe''1.07Mg0.05Fe'''1.61Al0.14Cr0.00Ti0.12O4	0	4.43371	3.16269	57.2141	0	34.2265	0	0.963054	0	0	0	0
2000	913	0.010164	0.019221	-47.3537	0.002069	0.009104	Fe''1.07Mg0.05Fe'''1.61Al0.14Cr0.00Ti0.12O4	0	4.37842	3.15162	57.3285	0	34.1881	0	0.953358	0	0	0	0
2000	912	0.010058	0.01901	-46.8194	0.002047	0.009008	Fe''1.07Mg0.05Fe'''1.62Al0.14Cr0.00Ti0.12O4	0	4.32358	3.14053	57.4422	0	34.1499	0	0.943748	0	0	0	0
2000	911	0.009954	0.018801	-46.2923	0.002025	0.008913	Fe''1.07Mg0.05Fe'''1.62Al0.14Cr0.00Ti0.12O4	0	4.26919	3.12943	57.5551	0	34.112	0	0.934223	0	0	0	0
2000	910	0.009851	0.018595	-45.7723	0.002004	0.008819	Fe''1.07Mg0.05Fe'''1.62Al0.14Cr0.00Ti0.12O4	0	4.21524	3.11831	57.6672	0	34.0744	0	0.924783	0	0	0	0
2000	909	0.009749	0.018391	-45.2592	0.001983	0.008727	Fe''1.07Mg0.05Fe'''1.63Al0.14Cr0.00Ti0.12O4	0	4.16174	3.10717	57.7785	0	34.0371	0	0.915426	0	0	0	0
2000	908	0.009649	0.01819	-44.753	0.001962	0.008635	Fe''1.07Mg0.05Fe'''1.63Al0.14Cr0.00Ti0.12O4	0	4.10869	3.09602	57.889	0	34.0001	0	0.906152	0	0	0	0
2000	907	0.00955	0.017992	-44.2536	0.001941	0.008545	Fe''1.06Mg0.05Fe'''1.64Al0.14Cr0.00Ti0.11O4	0	4.0561	3.08485	57.9987	0	33.9634	0	0.89696	0	0	0	0
2000	906	0.009451	0.017796	-43.7607	0.001921	0.008456	Fe''1.06Mg0.05Fe'''1.64Al0.14Cr0.00Ti0.11O4	0	4.00396	3.07366	58.1076	0	33.9269	0	0.887848	0	0	0	0
2000	905	0.009355	0.017602	-43.2743	0.001901	0.008367	Fe''1.06Mg0.05Fe'''1.64Al0.14Cr0.00Ti0.11O4	0	3.95227	3.06245	58.2157	0	33.8908	0	0.878816	0	0	0	0
2000	904	0.009259	0.017411	-42.7942	0.001881	0.00828	Fe''1.06Mg0.05Fe'''1.65Al0.13Cr0.00Ti0.11O4	0	3.90104	3.05122	58.3229	0	33.855	0	0.869863	0	0	0	0
2000	903	0.009164	0.017222	-42.3205	0.001861	0.008194	Fe''1.06Mg0.05Fe'''1.65Al0.13Cr0.00Ti0.11O4	0	3.85026	3.03997	58.4294	0	33.8194	0	0.860988	0	0	0	0
2000	902	0.009071	0.017036	-41.8528	0.001842	0.008109	Fe''1.06Mg0.05Fe'''1.65Al0.13Cr0.00Ti0.11O4	0	3.79994	3.0287	58.535	0	33.7842	0	0.852191	0	0	0	0
2000	901	0.008978	0.016852	-41.3912	0.001823	0.008025	Fe''1.06Mg0.05Fe'''1.66Al0.13Cr0.00Ti0.11O4	0	3.75008	3.01741	58.6398	0	33.7493	0	0.84347	0	0	0	0
2000	900	0.008887	0.01667	-40.9355	0.001804	0.007942	Fe''1.06Mg0.05Fe'''1.66Al0.13Cr0.00Ti0.10O4	0	3.70069	3.0061	58.7437	0	33.7147	0	0.834825	0	0	0	0
feldspar_0	thermodynamic	data	and	composition:
Pressure	Temperature	mass	S	H	V	Cp	formula	SiO2	TiO2	Al2O3	Fe2O3	Cr2O3	FeO	MnO	MgO	CaO	Na2O	K2O	H2O	An
2000	1161	0.670126	1.62801	-9224.54	0.252084	0.824003	K0.00Na0.31Ca0.69Al1.69Si2.31O8	50.8214	0	31.5079	0	0	0	0	0	14.1359	3.51989	0.0148664	0	69
2000	1160	0.618849	1.50304	-8519.27	0.232811	0.760894	K0.00Na0.31Ca0.69Al1.69Si2.31O8	50.853	0	31.4866	0	0	0	0	0	14.1109	3.5344	0.01505	0
2000	1159	0.607719	1.47563	-8366.63	0.22864	0.747153	K0.00Na0.31Ca0.69Al1.69Si2.31O8	50.8845	0	31.4654	0	0	0	0	0	14.086	3.54886	0.0152346	0
2000	1158	0.596888	1.44895	-8218.07	0.224581	0.733781	K0.00Na0.31Ca0.68Al1.68Si2.32O8	50.9159	0	31.4441	0	0	0	0	0	14.0612	3.56329	0.0154202	0
2000	1157	0.514345	1.2483	-7082.04	0.193545	0.632266	K0.00Na0.32Ca0.68Al1.68Si2.32O8	50.9605	0	31.4141	0	0	0	0	0	14.026	3.58376	0.0156171	0
2000	1156	0.514595	1.24862	-7085.91	0.193659	0.63253	K0.00Na0.32Ca0.68Al1.68Si2.32O8	51.0032	0	31.3853	0	0	0	0	0	13.9923	3.60344	0.0158139	0
2000	1155	0.50553	1.22634	-6961.51	0.190266	0.621344	K0.00Na0.32Ca0.68Al1.68Si2.32O8	51.046	0	31.3564	0	0	0	0	0	13.9585	3.62311	0.016012	0
2000	1154	0.496728	1.20471	-6840.71	0.186973	0.610484	K0.00Na0.32Ca0.68Al1.68Si2.32O8	51.0888	0	31.3275	0	0	0	0	0	13.9247	3.64279	0.0162114	0
2000	1153	0.493684	1.19705	-6799.21	0.185846	0.606702	K0.00Na0.32Ca0.68Al1.68Si2.32O8	51.1318	0	31.2986	0	0	0	0	0	13.8907	3.66254	0.0164132	0
2000	1152	0.489604	1.18688	-6743.43	0.184329	0.601646	K0.00Na0.32Ca0.67Al1.67Si2.33O8	51.1744	0	31.2698	0	0	0	0	0	13.8571	3.68213	0.0166165	0
2000	1151	0.481092	1.16598	-6626.6	0.181143	0.591146	K0.00Na0.33Ca0.67Al1.67Si2.33O8	51.217	0	31.2411	0	0	0	0	0	13.8234	3.70172	0.0168212	0
2000	1150	0.472823	1.14567	-6513.1	0.178047	0.580945	K0.00Na0.33Ca0.67Al1.67Si2.33O8	51.2596	0	31.2123	0	0	0	0	0	13.7898	3.72131	0.0170272	0
2000	1149	0.464788	1.12594	-6402.8	0.175039	0.571033	K0.00Na0.33Ca0.67Al1.67Si2.33O8	51.3022	0	31.1836	0	0	0	0	0	13.7561	3.74091	0.0172345	0
2000	1148	0.456977	1.10676	-6295.59	0.172115	0.561398	K0.00Na0.33Ca0.67Al1.67Si2.33O8	51.3448	0	31.1548	0	0	0	0	0	13.7224	3.76051	0.0174432	0
2000	1147	0.449383	1.08811	-6191.34	0.169272	0.55203	K0.00Na0.33Ca0.67Al1.67Si2.33O8	51.3875	0	31.126	0	0	0	0	0	13.6887	3.78011	0.0176533	0
2000	1146	0.441997	1.06998	-6089.95	0.166507	0.542919	K0.00Na0.33Ca0.66Al1.66Si2.34O8	51.4301	0	31.0973	0	0	0	0	0	13.655	3.79971	0.0178647	0
2000	1145	0.434811	1.05234	-5991.32	0.163817	0.534057	K0.00Na0.34Ca0.66Al1.66Si2.34O8	51.4728	0	31.0685	0	0	0	0	0	13.6214	3.81931	0.0180775	0
2000	1144	0.42782	1.03517	-5895.34	0.161199	0.525433	K0.00Na0.34Ca0.66Al1.66Si2.34O8	51.5154	0	31.0397	0	0	0	0	0	13.5877	3.83892	0.0182917	0
2000	1143	0.421014	1.01846	-5801.91	0.158651	0.517039	K0.00Na0.34Ca0.66Al1.66Si2.34O8	51.5581	0	31.0109	0	0	0	0	0	13.554	3.85852	0.0185073	0
2000	1142	0.414389	1.0022	-5710.96	0.15617	0.508867	K0.00Na0.34Ca0.66Al1.66Si2.34O8	51.6007	0	30.9821	0	0	0	0	0	13.5203	3.87813	0.0187243	0
2000	1141	0.407937	0.986362	-5622.38	0.153754	0.500909	K0.00Na0.34Ca0.66Al1.66Si2.34O8	51.6434	0	30.9534	0	0	0	0	0	13.4866	3.89774	0.0189428	0
2000	1140	0.401652	0.970936	-5536.1	0.151401	0.493158	K0.00Na0.34Ca0.65Al1.65Si2.35O8	51.6861	0	30.9246	0	0	0	0	0	13.4528	3.91735	0.0191628	0
2000	1139	0.395529	0.955908	-5452.04	0.149108	0.485606	K0.00Na0.35Ca0.65Al1.65Si2.35O8	51.7287	0	30.8958	0	0	0	0	0	13.4191	3.93695	0.0193842	0
2000	1138	0.389562	0.941262	-5370.11	0.146873	0.478247	K0.00Na0.35Ca0.65Al1.65Si2.35O8	51.7714	0	30.867	0	0	0	0	0	13.3854	3.95657	0.019607	0
2000	1137	0.383745	0.926987	-5290.25	0.144695	0.471073	K0.00Na0.35Ca0.65Al1.65Si2.35O8	51.8141	0	30.8382	0	0	0	0	0	13.3517	3.97618	0.0198314	0
2000	1136	0.378074	0.91307	-5212.39	0.142571	0.464079	K0.00Na0.35Ca0.65Al1.65Si2.35O8	51.8568	0	30.8094	0	0	0	0	0	13.318	3.99579	0.0200573	0
2000	1135	0.372543	0.899498	-5136.45	0.140499	0.457259	K0.00Na0.35Ca0.65Al1.65Si2.35O8	51.8995	0	30.7806	0	0	0	0	0	13.2843	4.0154	0.0202847	0
2000	1134	0.367149	0.88626	-5062.38	0.138479	0.450606	K0.00Na0.35Ca0.64Al1.64Si2.36O8	51.9421	0	30.7518	0	0	0	0	0	13.2505	4.03501	0.0205136	0
2000	1133	0.361885	0.873346	-4990.11	0.136507	0.444115	K0.00Na0.36Ca0.64Al1.64Si2.36O8	51.9848	0	30.723	0	0	0	0	0	13.2168	4.05462	0.0207441	0
2000	1132	0.356749	0.860743	-4919.59	0.134584	0.437781	K0.00Na0.36Ca0.64Al1.64Si2.36O8	52.0275	0	30.6942	0	0	0	0	0	13.1831	4.07423	0.0209761	0
2000	1131	0.351736	0.848443	-4850.75	0.132706	0.431599	K0.00Na0.36Ca0.64Al1.64Si2.36O8	52.0702	0	30.6654	0	0	0	0	0	13.1494	4.09384	0.0212098	0
2000	1130	0.346841	0.836434	-4783.54	0.130872	0.425564	K0.00Na0.36Ca0.64Al1.64Si2.36O8	52.1129	0	30.6366	0	0	0	0	0	13.1156	4.11345	0.0214449	0
2000	1129	0.342062	0.824709	-4717.92	0.129082	0.41967	K0.00Na0.36Ca0.64Al1.64Si2.36O8	52.1556	0	30.6078	0	0	0	0	0	13.0819	4.13305	0.0216817	0
2000	1128	0.337394	0.813258	-4653.82	0.127333	0.413914	K0.00Na0.36Ca0.63Al1.63Si2.37O8	52.1983	0	30.579	0	0	0	0	0	13.0482	4.15266	0.0219201	0
2000	1127	0.332834	0.802071	-4591.2	0.125625	0.408291	K0.00Na0.37Ca0.63Al1.63Si2.37O8	52.2409	0	30.5502	0	0	0	0	0	13.0145	4.17226	0.0221601	0
2000	1126	0.328378	0.791142	-4530.01	0.123956	0.402797	K0.00Na0.37Ca0.63Al1.63Si2.37O8	52.2836	0	30.5214	0	0	0	0	0	12.9808	4.19186	0.0224018	0
2000	1125	0.324024	0.780461	-4470.22	0.122324	0.397428	K0.00Na0.37Ca0.63Al1.63Si2.37O8	52.3263	0	30.4926	0	0	0	0	0	12.947	4.21146	0.0226451	0
2000	1124	0.319768	0.770021	-4411.77	0.12073	0.39218	K0.00Na0.37Ca0.63Al1.63Si2.37O8	52.369	0	30.4638	0	0	0	0	0	12.9133	4.23105	0.0228901	0
2000	1123	0.315607	0.759815	-4354.63	0.119171	0.38705	K0.00Na0.37Ca0.63Al1.63Si2.37O8	52.4116	0	30.435	0	0	0	0	0	12.8796	4.25064	0.0231367	0
2000	1122	0.311538	0.749836	-4298.75	0.117646	0.382033	K0.00Na0.38Ca0.62Al1.62Si2.38O8	52.4543	0	30.4062	0	0	0	0	0	12.8459	4.27023	0.023385	0
2000	1121	0.307559	0.740076	-4244.1	0.116155	0.377127	K0.00Na0.38Ca0.62Al1.62Si2.38O8	52.4969	0	30.3774	0	0	0	0	0	12.8122	4.28981	0.023635	0
2000	1120	0.303666	0.730529	-4190.64	0.114696	0.372327	K0.00Na0.38Ca0.62Al1.62Si2.38O8	52.5396	0	30.3486	0	0	0	0	0	12.7785	4.30939	0.0238868	0
2000	1119	0.299857	0.721189	-4138.33	0.113269	0.367631	K0.00Na0.38Ca0.62Al1.62Si2.38O8	52.5822	0	30.3198	0	0	0	0	0	12.7448	4.32896	0.0241402	0
2000	1118	0.29613	0.712049	-4087.14	0.111873	0.363036	K0.00Na0.38Ca0.62Al1.62Si2.38O8	52.6248	0	30.2911	0	0	0	0	0	12.7112	4.34853	0.0243955	0
2000	1117	0.292483	0.703104	-4037.05	0.110506	0.358539	K0.00Na0.38Ca0.62Al1.62Si2.38O8	52.6674	0	30.2623	0	0	0	0	0	12.6775	4.36809	0.0246524	0
2000	1116	0.288912	0.694348	-3988	0.109167	0.354137	K0.00Na0.39Ca0.61Al1.61Si2.39O8	52.71	0	30.2336	0	0	0	0	0	12.6438	4.38765	0.0249111	0
2000	1115	0.285416	0.685776	-3939.99	0.107857	0.349827	K0.00Na0.39Ca0.61Al1.61Si2.39O8	52.7526	0	30.2048	0	0	0	0	0	12.6102	4.4072	0.0251716	0
2000	1114	0.281992	0.677381	-3892.96	0.106574	0.345606	K0.00Na0.39Ca0.61Al1.61Si2.39O8	52.7952	0	30.1761	0	0	0	0	0	12.5765	4.42674	0.0254339	0
2000	1113	0.278639	0.66916	-3846.91	0.105317	0.341473	K0.00Na0.39Ca0.61Al1.61Si2.39O8	52.8378	0	30.1473	0	0	0	0	0	12.5429	4.44628	0.025698	0
2000	1112	0.275355	0.661106	-3801.79	0.104086	0.337423	K0.00Na0.39Ca0.61Al1.61Si2.39O8	52.8803	0	30.1186	0	0	0	0	0	12.5093	4.46581	0.0259639	0
2000	1111	0.272137	0.653216	-3757.59	0.10288	0.333456	K0.00Na0.39Ca0.60Al1.60Si2.40O8	52.9229	0	30.0899	0	0	0	0	0	12.4757	4.48533	0.0262317	0
2000	1110	0.268983	0.645485	-3714.28	0.101698	0.329569	K0.00Na0.40Ca0.60Al1.60Si2.40O8	52.9654	0	30.0612	0	0	0	0	0	12.442	4.50484	0.0265012	0
2000	1109	0.265893	0.637908	-3671.83	0.100539	0.325759	K0.00Na0.40Ca0.60Al1.60Si2.40O8	53.0079	0	30.0325	0	0	0	0	0	12.4085	4.52435	0.0267727	0
2000	1108	0.262863	0.630481	-3630.21	0.099404	0.322024	K0.00Na0.40Ca0.60Al1.60Si2.40O8	53.0504	0	30.0038	0	0	0	0	0	12.3749	4.54384	0.027046	0
2000	1107	0.259893	0.623201	-3589.42	0.098291	0.318363	K0.00Na0.40Ca0.60Al1.60Si2.40O8	53.0929	0	29.9752	0	0	0	0	0	12.3413	4.56333	0.0273212	0
2000	1106	0.256981	0.616062	-3549.42	0.097199	0.314774	K0.00Na0.40Ca0.60Al1.60Si2.40O8	53.1353	0	29.9465	0	0	0	0	0	12.3078	4.5828	0.0275983	0
2000	1105	0.254126	0.609061	-3510.19	0.096128	0.311253	K0.00Na0.40Ca0.59Al1.59Si2.41O8	53.1778	0	29.9179	0	0	0	0	0	12.2742	4.60227	0.0278773	0
2000	1104	0.251325	0.602195	-3471.71	0.095078	0.307801	K0.00Na0.41Ca0.59Al1.59Si2.41O8	53.2202	0	29.8892	0	0	0	0	0	12.2407	4.62172	0.0281582	0
2000	1103	0.248577	0.595459	-3433.96	0.094048	0.304413	K0.00Na0.41Ca0.59Al1.59Si2.41O8	53.2626	0	29.8606	0	0	0	0	0	12.2072	4.64117	0.028441	0
2000	1102	0.245881	0.588851	-3396.93	0.093037	0.30109	K0.00Na0.41Ca0.59Al1.59Si2.41O8	53.3049	0	29.832	0	0	0	0	0	12.1737	4.6606	0.0287258	0
2000	1101	0.243235	0.582367	-3360.58	0.092045	0.29783	K0.00Na0.41Ca0.59Al1.59Si2.41O8	53.3473	0	29.8034	0	0	0	0	0	12.1403	4.68002	0.0290126	0
2000	1100	0.240639	0.576003	-3324.92	0.091072	0.294629	K0.00Na0.41Ca0.59Al1.59Si2.41O8	53.3896	0	29.7748	0	0	0	0	0	12.1068	4.69943	0.0293013	0
2000	1099	0.238091	0.569757	-3289.91	0.090116	0.291488	K0.00Na0.41Ca0.58Al1.58Si2.42O8	53.4319	0	29.7463	0	0	0	0	0	12.0734	4.71883	0.029592	0
2000	1098	0.235589	0.563625	-3255.54	0.089178	0.288405	K0.00Na0.42Ca0.58Al1.58Si2.42O8	53.4742	0	29.7177	0	0	0	0	0	12.04	4.73821	0.0298848	0
2000	1097	0.233133	0.557605	-3221.8	0.088257	0.285377	K0.00Na0.42Ca0.58Al1.58Si2.42O8	53.5164	0	29.6892	0	0	0	0	0	12.0066	4.75758	0.0301795	0
2000	1096	0.230721	0.551694	-3188.66	0.087352	0.282404	K0.00Na0.42Ca0.58Al1.58Si2.42O8	53.5587	0	29.6607	0	0	0	0	0	11.9732	4.77694	0.0304763	0
2000	1095	0.228352	0.545888	-3156.11	0.086464	0.279485	K0.00Na0.42Ca0.58Al1.58Si2.42O8	53.6009	0	29.6322	0	0	0	0	0	11.9399	4.79628	0.0307751	0
2000	1094	0.226026	0.540186	-3124.15	0.085591	0.276617	K0.00Na0.42Ca0.58Al1.58Si2.42O8	53.643	0	29.6038	0	0	0	0	0	11.9065	4.81561	0.031076	0
2000	1093	0.22374	0.534585	-3092.75	0.084734	0.2738	K0.00Na0.42Ca0.57Al1.57Si2.43O8	53.6852	0	29.5753	0	0	0	0	0	11.8732	4.83493	0.0313789	0
2000	1092	0.221494	0.529081	-3061.89	0.083892	0.271032	K0.00Na0.43Ca0.57Al1.57Si2.43O8	53.7273	0	29.5469	0	0	0	0	0	11.8399	4.85423	0.0316839	0
2000	1091	0.219288	0.523673	-3031.57	0.083064	0.268312	K0.00Na0.43Ca0.57Al1.57Si2.43O8	53.7693	0	29.5185	0	0	0	0	0	11.8067	4.87351	0.031991	0
2000	1090	0.217119	0.518359	-3001.78	0.08225	0.26564	K0.00Na0.43Ca0.57Al1.57Si2.43O8	53.8114	0	29.4901	0	0	0	0	0	11.7735	4.89278	0.0323003	0
2000	1089	0.214988	0.513135	-2972.49	0.081451	0.263013	K0.00Na0.43Ca0.57Al1.57Si2.43O8	53.8534	0	29.4617	0	0	0	0	0	11.7403	4.91203	0.0326116	0
2000	1088	0.212892	0.508001	-2943.7	0.080665	0.26043	K0.00Na0.43Ca0.57Al1.57Si2.43O8	53.8954	0	29.4334	0	0	0	0	0	11.7071	4.93127	0.0329251	0
2000	1087	0.210832	0.502953	-2915.39	0.079892	0.257891	K0.00Na0.43Ca0.56Al1.56Si2.44O8	53.9373	0	29.405	0	0	0	0	0	11.6739	4.95049	0.0332407	0
2000	1086	0.208807	0.497989	-2887.56	0.079132	0.255395	K0.00Na0.44Ca0.56Al1.56Si2.44O8	53.9792	0	29.3767	0	0	0	0	0	11.6408	4.96969	0.0335585	0
2000	1085	0.206815	0.493108	-2860.19	0.078385	0.25294	K0.00Na0.44Ca0.56Al1.56Si2.44O8	54.0211	0	29.3484	0	0	0	0	0	11.6077	4.98887	0.0338785	0
2000	1084	0.204856	0.488308	-2833.27	0.07765	0.250526	K0.00Na0.44Ca0.56Al1.56Si2.44O8	54.063	0	29.3202	0	0	0	0	0	11.5746	5.00804	0.0342007	0
[truncated: 2,415 more rows]
