# Supplementary material for: A 5-km-thick reservoir with > 380,000 km3 of magma within the ancient Earth's crust
Source: Sci Rep. 2022 Sep 19;12:15651. doi: 10.1038/s41598-022-19915-w (PMC9485162; doi:10.1038/s41598-022-19915-w)
Supplement: Supplementary file 17 — Supplementary Information 17. [file 41598_2022_19915_MOESM17_ESM.xlsx]

## Sheet: alphaMELTS_tbl
SupplTable S4B-3 - Fractional crystallization of the mix O30R70
System	Thermodynamic	Data:
Pressure	Temperature	mass	F	phi	S	H	V	dVdP*10^6	dVdT*10^6	Cp	logfO2(absolute)	logfO2-QFM	rhol	rhos	viscosity	aH2O	chisqr
2000	1400	99.9944	1	1	295.794	-1.22051e+06	40.0952	-358.237	3298.49	149.746	-6.318	0	2.49393	0	2.017	0.0826675	0
2000	1400	99.9944	1	1	295.794	-1.22051e+06	40.0952	-358.237	3298.49	149.746	-6.318	0	2.49393	0	2.017	0.0826675	0
2000	1399	99.9944	1	1	295.705	-1.22066e+06	40.0919	-358.176	3298.35	149.745	-6.327	0	2.49413	0	2.021	0.082653	0
2000	1398	99.9944	1	1	295.615	-1.22081e+06	40.0886	-358.114	3298.21	149.745	-6.336	0	2.49434	0	2.025	0.0826386	0
2000	1397	99.9944	1	1	295.525	-1.22096e+06	40.0853	-358.053	3298.08	149.744	-6.345	0	2.49454	0	2.029	0.0826241	0
2000	1396	99.9945	1	1	295.436	-1.22111e+06	40.082	-357.992	3297.94	149.744	-6.353	0	2.49475	0	2.033	0.0826096	0
2000	1395	99.9945	1	1	295.346	-1.22126e+06	40.0787	-357.931	3297.8	149.744	-6.362	0	2.49495	0	2.036	0.0825951	0
2000	1394	99.9945	1	1	295.256	-1.22141e+06	40.0754	-357.87	3297.66	149.743	-6.371	0	2.49516	0	2.04	0.0825807	0
2000	1393	99.9945	1	1	295.166	-1.22156e+06	40.0722	-357.808	3297.53	149.743	-6.38	0	2.49536	0	2.044	0.0825662	0
2000	1392	99.9945	1	1	295.077	-1.22171e+06	40.0689	-357.747	3297.39	149.743	-6.388	0	2.49557	0	2.048	0.0825518	0
2000	1391	99.9945	1	1	294.987	-1.22186e+06	40.0656	-357.686	3297.25	149.742	-6.397	0	2.49577	0	2.052	0.0825374	0
2000	1390	99.9945	1	1	294.897	-1.22201e+06	40.0623	-357.625	3297.11	149.742	-6.406	0	2.49598	0	2.056	0.0825229	0
2000	1389	99.9945	1	1	294.807	-1.22216e+06	40.059	-357.564	3296.96	149.742	-6.415	0	2.49618	0	2.06	0.0825085	0
2000	1388	99.9946	1	1	294.717	-1.22231e+06	40.0557	-357.503	3296.82	149.741	-6.424	0	2.49639	0	2.064	0.0824941	0
2000	1387	99.9946	1	1	294.626	-1.22246e+06	40.0525	-357.442	3296.68	149.741	-6.433	0	2.49659	0	2.067	0.0824797	0
2000	1386	99.9946	1	1	294.536	-1.22261e+06	40.0492	-357.381	3296.54	149.741	-6.442	0	2.4968	0	2.071	0.0824653	0
2000	1385	99.9946	1	1	294.446	-1.22276e+06	40.0459	-357.32	3296.39	149.74	-6.45	0	2.497	0	2.075	0.0824509	0
2000	1384	99.9946	1	1	294.356	-1.22291e+06	40.0426	-357.259	3296.25	149.74	-6.459	0	2.49721	0	2.079	0.0824365	0
2000	1383	99.9946	1	1	294.265	-1.22306e+06	40.0393	-357.198	3296.11	149.739	-6.468	0	2.49741	0	2.083	0.0824221	0
2000	1382	99.9946	1	1	294.175	-1.22321e+06	40.036	-357.137	3295.96	149.739	-6.477	0	2.49762	0	2.087	0.0824077	0
2000	1381	99.9947	1	1	294.085	-1.22336e+06	40.0328	-357.076	3295.81	149.739	-6.486	0	2.49782	0	2.091	0.0823933	0
2000	1380	99.9947	1	1	293.994	-1.22351e+06	40.0295	-357.015	3295.67	149.738	-6.495	0	2.49803	0	2.095	0.082379	0
2000	1379	99.9947	1	1	293.903	-1.22366e+06	40.0262	-356.954	3295.52	149.738	-6.504	0	2.49823	0	2.099	0.0823646	0
2000	1378	99.9947	1	1	293.813	-1.22381e+06	40.0229	-356.893	3295.37	149.738	-6.513	0	2.49844	0	2.103	0.0823502	0
2000	1377	99.9947	1	1	293.722	-1.22396e+06	40.0196	-356.832	3295.23	149.737	-6.522	0	2.49864	0	2.107	0.0823359	0
2000	1376	99.9947	1	1	293.631	-1.22411e+06	40.0164	-356.771	3295.08	149.737	-6.531	0	2.49885	0	2.11	0.0823216	0
2000	1375	99.9948	1	1	293.541	-1.22426e+06	40.0131	-356.711	3294.93	149.737	-6.54	0	2.49905	0	2.114	0.0823072	0
2000	1374	99.9948	1	1	293.45	-1.22441e+06	40.0098	-356.65	3294.78	149.736	-6.549	0	2.49926	0	2.118	0.0822929	0
2000	1373	99.9948	1	1	293.359	-1.22456e+06	40.0065	-356.589	3294.63	149.736	-6.558	0	2.49946	0	2.122	0.0822786	0
2000	1372	99.9948	1	1	293.268	-1.22471e+06	40.0032	-356.528	3294.48	149.736	-6.567	0	2.49967	0	2.126	0.0822643	0
2000	1371	99.9948	1	1	293.177	-1.22486e+06	40	-356.467	3294.33	149.735	-6.576	0	2.49987	0	2.13	0.08225	0
2000	1370	99.9948	1	1	293.086	-1.22501e+06	39.9967	-356.407	3294.18	149.735	-6.585	0	2.50008	0	2.134	0.0822357	0
2000	1369	99.9949	1	1	292.995	-1.22516e+06	39.9934	-356.346	3294.02	149.735	-6.594	0	2.50028	0	2.138	0.0822214	0
2000	1368	99.9949	1	1	292.904	-1.22531e+06	39.9901	-356.285	3293.87	149.734	-6.603	0	2.50049	0	2.142	0.0822071	0
2000	1367	99.9949	1	1	292.812	-1.22546e+06	39.9868	-356.225	3293.72	149.734	-6.612	0	2.50069	0	2.146	0.0821928	0
2000	1366	99.9949	1	1	292.721	-1.22561e+06	39.9836	-356.164	3293.56	149.734	-6.621	0	2.5009	0	2.15	0.0821786	0
2000	1365	99.9949	1	1	292.63	-1.22576e+06	39.9803	-356.103	3293.41	149.733	-6.63	0	2.50111	0	2.154	0.0821643	0
2000	1364	99.9949	1	1	292.538	-1.22591e+06	39.977	-356.043	3293.25	149.733	-6.64	0	2.50131	0	2.158	0.0821501	0
2000	1363	99.995	1	1	292.447	-1.22606e+06	39.9737	-355.982	3293.1	149.733	-6.649	0	2.50152	0	2.162	0.0821358	0
2000	1362	99.995	1	1	292.355	-1.22621e+06	39.9704	-355.922	3292.94	149.732	-6.658	0	2.50172	0	2.166	0.0821216	0
2000	1361	99.995	1	1	292.264	-1.22636e+06	39.9672	-355.861	3292.78	149.732	-6.667	0	2.50193	0	2.17	0.0821074	0
2000	1360	99.995	1	1	292.172	-1.22651e+06	39.9639	-355.8	3292.63	149.732	-6.676	0	2.50213	0	2.174	0.0820932	0
2000	1359	99.995	1	1	292.081	-1.22666e+06	39.9606	-355.74	3292.47	149.731	-6.685	0	2.50234	0	2.178	0.082079	0
2000	1358	99.9951	1	1	291.989	-1.22681e+06	39.9573	-355.679	3292.31	149.731	-6.694	0	2.50255	0	2.182	0.0820648	0
2000	1357	99.9951	1	1	291.897	-1.22696e+06	39.9541	-355.619	3292.15	149.731	-6.704	0	2.50275	0	2.186	0.0820506	0
2000	1356	99.9951	1	1	291.805	-1.22711e+06	39.9508	-355.559	3291.99	149.73	-6.713	0	2.50296	0	2.19	0.0820364	0
2000	1355	99.9951	1	1	291.713	-1.22726e+06	39.9475	-355.498	3291.83	149.73	-6.722	0	2.50316	0	2.194	0.0820222	0
2000	1354	99.9951	1	1	291.621	-1.22741e+06	39.9442	-355.438	3291.67	149.73	-6.731	0	2.50337	0	2.198	0.0820081	0
2000	1353	99.9951	1	1	291.529	-1.22756e+06	39.941	-355.377	3291.51	149.729	-6.741	0	2.50357	0	2.202	0.0819939	0
2000	1352	99.9952	1	1	291.437	-1.22771e+06	39.9377	-355.317	3291.35	149.729	-6.75	0	2.50378	0	2.206	0.0819798	0
2000	1351	99.9952	1	1	291.345	-1.22786e+06	39.9344	-355.256	3291.18	149.729	-6.759	0	2.50399	0	2.21	0.0819656	0
2000	1350	99.9952	1	1	291.253	-1.22801e+06	39.9311	-355.196	3291.02	149.728	-6.768	0	2.50419	0	2.215	0.0819515	0
2000	1349	99.9952	1	1	291.161	-1.22816e+06	39.9279	-355.136	3290.86	149.728	-6.778	0	2.5044	0	2.219	0.0819374	0
2000	1348	99.9952	1	1	291.069	-1.22831e+06	39.9246	-355.076	3290.69	149.728	-6.787	0	2.5046	0	2.223	0.0819233	0
2000	1347	99.9953	1	1	290.976	-1.22846e+06	39.9213	-355.015	3290.53	149.727	-6.796	0	2.50481	0	2.227	0.0819092	0
2000	1346	99.9953	1	1	290.884	-1.22861e+06	39.9181	-354.955	3290.36	149.727	-6.806	0	2.50501	0	2.231	0.0818951	0
2000	1345	99.9953	1	1	290.791	-1.22876e+06	39.9148	-354.895	3290.2	149.727	-6.815	0	2.50522	0	2.235	0.081881	0
2000	1344	99.9953	1	1	290.699	-1.22891e+06	39.9115	-354.834	3290.03	149.726	-6.824	0	2.50543	0	2.239	0.0818669	0
2000	1343	99.9954	1	1	290.606	-1.22906e+06	39.9082	-354.774	3289.86	149.726	-6.834	0	2.50563	0	2.243	0.0818529	0
2000	1342	99.9954	1	1	290.514	-1.22921e+06	39.905	-354.714	3289.7	149.726	-6.843	0	2.50584	0	2.247	0.0818388	0
2000	1341	99.9954	1	1	290.421	-1.22936e+06	39.9017	-354.654	3289.53	149.725	-6.852	0	2.50604	0	2.251	0.0818248	0
2000	1340	99.9954	1	1	290.328	-1.22951e+06	39.8984	-354.594	3289.36	149.725	-6.862	0	2.50625	0	2.255	0.0818107	0
2000	1339	99.9954	1	1	290.235	-1.22966e+06	39.8952	-354.534	3289.19	149.725	-6.871	0	2.50645	0	2.26	0.0817967	0
2000	1338	99.9955	1	1	290.143	-1.22981e+06	39.8919	-354.474	3289.02	149.724	-6.88	0	2.50666	0	2.264	0.0817827	0
2000	1337	99.9955	1	1	290.05	-1.22996e+06	39.8886	-354.413	3288.85	149.724	-6.89	0	2.50687	0	2.268	0.0817687	0
2000	1336	99.9955	1	1	289.957	-1.23011e+06	39.8854	-354.353	3288.68	149.724	-6.899	0	2.50707	0	2.272	0.0817547	0
2000	1335	99.9955	1	1	289.864	-1.23026e+06	39.8821	-354.293	3288.51	149.723	-6.909	0	2.50728	0	2.276	0.0817407	0
2000	1334	99.9955	1	1	289.771	-1.23041e+06	39.8788	-354.233	3288.34	149.723	-6.918	0	2.50749	0	2.28	0.0817268	0
2000	1333	99.9956	1	1	289.677	-1.23056e+06	39.8755	-354.173	3288.16	149.723	-6.928	0	2.50769	0	2.284	0.0817128	0
2000	1332	99.9956	1	1	289.584	-1.23071e+06	39.8723	-354.113	3287.99	149.723	-6.937	0	2.5079	0	2.289	0.0816988	0
2000	1331	99.9956	1	1	289.491	-1.23086e+06	39.869	-354.053	3287.82	149.722	-6.947	0	2.5081	0	2.293	0.0816849	0
2000	1330	99.9956	1	1	289.398	-1.23101e+06	39.8657	-353.993	3287.64	149.722	-6.956	0	2.50831	0	2.297	0.081671	0
2000	1329	99.9957	1	1	289.304	-1.23116e+06	39.8625	-353.933	3287.47	149.722	-6.966	0	2.50852	0	2.301	0.0816571	0
2000	1328	99.9957	1	1	289.211	-1.23131e+06	39.8592	-353.874	3287.29	149.721	-6.975	0	2.50872	0	2.305	0.0816432	0
2000	1327	99.9957	1	1	289.117	-1.23146e+06	39.8559	-353.814	3287.12	149.721	-6.985	0	2.50893	0	2.309	0.0816293	0
2000	1326	99.9957	1	1	289.024	-1.23161e+06	39.8527	-353.754	3286.94	149.721	-6.994	0	2.50914	0	2.314	0.0816154	0
2000	1325	99.9958	1	1	288.93	-1.23176e+06	39.8494	-353.694	3286.76	149.72	-7.004	0	2.50934	0	2.318	0.0816015	0
2000	1324	99.9958	1	1	288.837	-1.23191e+06	39.8461	-353.634	3286.58	149.72	-7.013	0	2.50955	0	2.322	0.0815876	0
2000	1323	99.9958	1	1	288.743	-1.23206e+06	39.8429	-353.574	3286.41	149.72	-7.023	0	2.50975	0	2.326	0.0815738	0
2000	1322	99.9958	1	1	288.649	-1.23221e+06	39.8396	-353.515	3286.23	149.719	-7.033	0	2.50996	0	2.33	0.0815599	0
2000	1321	99.9958	1	1	288.555	-1.23236e+06	39.8363	-353.455	3286.05	149.719	-7.042	0	2.51017	0	2.335	0.0815461	0
2000	1320	99.9959	1	1	288.461	-1.23251e+06	39.8331	-353.395	3285.87	149.719	-7.052	0	2.51037	0	2.339	0.0815323	0
2000	1319	99.9959	1	1	288.367	-1.23266e+06	39.8298	-353.335	3285.69	149.719	-7.062	0	2.51058	0	2.343	0.0815185	0
2000	1318	99.9959	1	1	288.273	-1.23281e+06	39.8266	-353.276	3285.51	149.718	-7.071	0	2.51078	0	2.347	0.0815047	0
2000	1317	99.9959	1	1	288.179	-1.23296e+06	39.8233	-353.216	3285.33	149.718	-7.081	0	2.51099	0	2.352	0.0814909	0
2000	1316	99.996	1	1	288.085	-1.23311e+06	39.82	-353.156	3285.14	149.718	-7.09	0	2.5112	0	2.356	0.0814771	0
2000	1315	99.996	1	1	287.991	-1.23326e+06	39.8168	-353.097	3284.96	149.717	-7.1	0	2.5114	0	2.36	0.0814634	0
2000	1314	99.996	1	1	287.897	-1.23341e+06	39.8135	-353.037	3284.78	149.717	-7.11	0	2.51161	0	2.364	0.0814496	0
2000	1313	99.996	1	1	287.803	-1.23356e+06	39.8102	-352.977	3284.59	149.717	-7.12	0	2.51182	0	2.369	0.0814359	0
2000	1312	99.9961	1	1	287.708	-1.23371e+06	39.807	-352.918	3284.41	149.717	-7.129	0	2.51202	0	2.373	0.0814222	0
2000	1311	99.9961	1	1	287.614	-1.23386e+06	39.8037	-352.858	3284.23	149.716	-7.139	0	2.51223	0	2.377	0.0814085	0
2000	1310	99.9961	1	1	287.519	-1.23401e+06	39.8005	-352.799	3284.04	149.716	-7.149	0	2.51244	0	2.381	0.0813948	0
2000	1309	99.9962	1	1	287.425	-1.23416e+06	39.7972	-352.739	3283.85	149.716	-7.159	0	2.51264	0	2.386	0.0813811	0
2000	1308	99.9962	1	1	287.33	-1.23431e+06	39.7939	-352.68	3283.67	149.715	-7.168	0	2.51285	0	2.39	0.0813674	0
2000	1307	99.9962	1	1	287.235	-1.23446e+06	39.7907	-352.62	3283.48	149.715	-7.178	0	2.51306	0	2.394	0.0813538	0
2000	1306	99.9962	1	1	287.141	-1.23461e+06	39.7874	-352.561	3283.29	149.715	-7.188	0	2.51326	0	2.398	0.0813401	0
2000	1305	99.9963	1	1	287.046	-1.23476e+06	39.7842	-352.501	3283.11	149.715	-7.198	0	2.51347	0	2.403	0.0813265	0
2000	1304	99.9963	1	1	286.951	-1.23491e+06	39.7809	-352.442	3282.92	149.714	-7.208	0	2.51368	0	2.407	0.0813129	0
2000	1303	99.9963	1	1	286.856	-1.23506e+06	39.7776	-352.382	3282.73	149.714	-7.217	0	2.51388	0	2.411	0.0812993	0
2000	1302	99.9963	1	1	286.761	-1.23521e+06	39.7744	-352.323	3282.54	149.714	-7.227	0	2.51409	0	2.416	0.0812857	0
2000	1301	99.9964	1	1	286.666	-1.23536e+06	39.7711	-352.264	3282.35	149.713	-7.237	0	2.5143	0	2.42	0.0812721	0
2000	1300	99.9964	1	1	286.571	-1.23551e+06	39.7679	-352.204	3282.16	149.713	-7.247	0	2.5145	0	2.424	0.0812585	0
2000	1299	99.9964	1	1	286.476	-1.23566e+06	39.7646	-352.145	3281.96	149.713	-7.257	0	2.51471	0	2.429	0.081245	0
2000	1298	99.9964	1	1	286.381	-1.23581e+06	39.7613	-352.086	3281.77	149.713	-7.267	0	2.51492	0	2.433	0.0812314	0
2000	1297	99.9965	1	1	286.286	-1.23596e+06	39.7581	-352.027	3281.58	149.712	-7.277	0	2.51512	0	2.437	0.0812179	0
2000	1296	99.9965	1	1	286.19	-1.23611e+06	39.7548	-351.967	3281.39	149.712	-7.287	0	2.51533	0	2.442	0.0812044	0
2000	1295	99.9965	1	1	286.095	-1.23626e+06	39.7516	-351.908	3281.19	149.712	-7.296	0	2.51554	0	2.446	0.0811909	0
2000	1294	99.9966	1	1	285.999	-1.23641e+06	39.7483	-351.849	3281	149.712	-7.306	0	2.51574	0	2.45	0.0811774	0
2000	1293	99.9966	1	1	285.904	-1.23656e+06	39.7451	-351.79	3280.8	149.711	-7.316	0	2.51595	0	2.455	0.081164	0
2000	1292	99.9966	1	1	285.808	-1.23671e+06	39.7418	-351.73	3280.61	149.711	-7.326	0	2.51616	0	2.459	0.0811505	0
2000	1291	99.9967	1	1	285.713	-1.23686e+06	39.7386	-351.671	3280.41	149.711	-7.336	0	2.51636	0	2.464	0.0811371	0
2000	1290	99.9967	1	1	285.617	-1.23701e+06	39.7353	-351.612	3280.22	149.71	-7.346	0	2.51657	0	2.468	0.0811236	0
2000	1289	99.9967	1	1	285.521	-1.23716e+06	39.732	-351.553	3280.02	149.71	-7.356	0	2.51678	0	2.472	0.0811102	0
2000	1288	99.9967	1	1	285.426	-1.23731e+06	39.7288	-351.494	3279.82	149.71	-7.366	0	2.51698	0	2.477	0.0810968	0
2000	1287	99.9968	1	1	285.33	-1.23746e+06	39.7255	-351.435	3279.62	149.71	-7.376	0	2.51719	0	2.481	0.0810834	0
2000	1286	99.9968	1	1	285.234	-1.23761e+06	39.7223	-351.376	3279.43	149.709	-7.386	0	2.5174	0	2.486	0.0810701	0
2000	1285	99.9968	1	1	285.138	-1.23776e+06	39.719	-351.317	3279.23	149.709	-7.396	0	2.51761	0	2.49	0.0810567	0
2000	1284	99.9969	1	1	285.042	-1.23791e+06	39.7158	-351.258	3279.03	149.709	-7.407	0	2.51781	0	2.494	0.0810434	0
2000	1283	99.9969	1	1	284.946	-1.23806e+06	39.7125	-351.199	3278.83	149.709	-7.417	0	2.51802	0	2.499	0.0810301	0
2000	1282	99.9969	1	1	284.849	-1.23821e+06	39.7093	-351.14	3278.62	149.708	-7.427	0	2.51823	0	2.503	0.0810168	0
2000	1281	99.997	1	1	284.753	-1.23836e+06	39.706	-351.081	3278.42	149.708	-7.437	0	2.51843	0	2.508	0.0810035	0
2000	1280	99.997	1	1	284.657	-1.23851e+06	39.7028	-351.022	3278.22	149.708	-7.447	0	2.51864	0	2.512	0.0809902	0
2000	1279	99.997	1	1	284.561	-1.23866e+06	39.6995	-350.963	3278.02	149.708	-7.457	0	2.51885	0	2.517	0.0809769	0
2000	1278	99.997	1	1	284.464	-1.23881e+06	39.6963	-350.904	3277.82	149.707	-7.467	0	2.51905	0	2.521	0.0809637	0
2000	1277	99.9971	1	1	284.368	-1.23896e+06	39.693	-350.846	3277.61	149.707	-7.477	0	2.51926	0	2.525	0.0809505	0
2000	1276	99.9971	1	1	284.271	-1.23911e+06	39.6898	-350.787	3277.41	149.707	-7.488	0	2.51947	0	2.53	0.0809372	0
2000	1275	99.9971	1	1	284.174	-1.23926e+06	39.6865	-350.728	3277.2	149.707	-7.498	0	2.51967	0	2.534	0.080924	0
2000	1274	99.9972	1	1	284.078	-1.23942e+06	39.6833	-350.669	3277	149.706	-7.508	0	2.51988	0	2.539	0.0809109	0
2000	1273	99.9972	1	1	283.981	-1.23957e+06	39.68	-350.61	3276.79	149.706	-7.518	0	2.52009	0	2.543	0.0808977	0
2000	1272	99.9972	1	1	283.884	-1.23972e+06	39.6768	-350.552	3276.59	149.706	-7.528	0	2.5203	0	2.548	0.0808846	0
2000	1271	99.9973	1	1	283.787	-1.23987e+06	39.6735	-350.493	3276.38	149.706	-7.539	0	2.5205	0	2.552	0.0808714	0
2000	1270	99.9973	1	1	283.691	-1.24002e+06	39.6703	-350.434	3276.17	149.705	-7.549	0	2.52071	0	2.557	0.0808583	0
2000	1269	99.9973	1	1	283.594	-1.24017e+06	39.667	-350.376	3275.96	149.705	-7.559	0	2.52092	0	2.561	0.0808452	0
2000	1268	99.9974	1	1	283.497	-1.24032e+06	39.6638	-350.317	3275.76	149.705	-7.57	0	2.52113	0	2.566	0.0808321	0
2000	1267	99.9974	1	1	283.399	-1.24047e+06	39.6605	-350.258	3275.55	149.705	-7.58	0	2.52133	0	2.57	0.0808191	0
2000	1266	99.9974	1	1	283.302	-1.24062e+06	39.6573	-350.2	3275.34	149.704	-7.59	0	2.52154	0	2.575	0.080806	0
2000	1265	99.9975	1	1	283.205	-1.24077e+06	39.6541	-350.141	3275.13	149.704	-7.6	0	2.52175	0	2.579	0.080793	0
2000	1264	99.9975	1	1	283.108	-1.24092e+06	39.6508	-350.083	3274.92	149.704	-7.611	0	2.52195	0	2.584	0.08078	0
2000	1263	99.9975	1	1	283.01	-1.24107e+06	39.6476	-350.024	3274.7	149.704	-7.621	0	2.52216	0	2.588	0.080767	0
2000	1262	99.9976	1	1	282.913	-1.24122e+06	39.6443	-349.965	3274.49	149.703	-7.632	0	2.52237	0	2.593	0.080754	0
2000	1261	99.9976	1	1	282.816	-1.24137e+06	39.6411	-349.907	3274.28	149.703	-7.642	0	2.52258	0	2.598	0.080741	0
2000	1260	99.9977	1	1	282.718	-1.24152e+06	39.6378	-349.848	3274.07	149.703	-7.652	0	2.52278	0	2.602	0.0807281	0
2000	1259	99.9977	1	1	282.62	-1.24167e+06	39.6346	-349.79	3273.85	149.703	-7.663	0	2.52299	0	2.607	0.0807152	0
2000	1258	99.9977	1	1	282.523	-1.24182e+06	39.6313	-349.732	3273.64	149.702	-7.673	0	2.5232	0	2.611	0.0807023	0
2000	1257	99.9978	1	1	282.425	-1.24197e+06	39.6281	-349.673	3273.42	149.702	-7.684	0	2.5234	0	2.616	0.0806894	0
2000	1256	99.9978	1	1	282.327	-1.24212e+06	39.6249	-349.615	3273.21	149.702	-7.694	0	2.52361	0	2.62	0.0806765	0
2000	1255	99.9978	1	1	282.229	-1.24227e+06	39.6216	-349.556	3272.99	149.702	-7.704	0	2.52382	0	2.625	0.0806637	0
2000	1254	99.9979	1	1	282.131	-1.24242e+06	39.6184	-349.498	3272.78	149.702	-7.715	0	2.52403	0	2.63	0.0806508	0
2000	1253	99.9979	1	1	282.033	-1.24257e+06	39.6151	-349.44	3272.56	149.701	-7.725	0	2.52424	0	2.634	0.080638	0
2000	1252	99.9979	1	1	281.935	-1.24272e+06	39.6119	-349.382	3272.34	149.701	-7.736	0	2.52444	0	2.639	0.0806252	0
2000	1251	99.998	1	1	281.837	-1.24287e+06	39.6087	-349.323	3272.13	149.701	-7.746	0	2.52465	0	2.643	0.0806124	0
2000	1250	99.998	1	1	281.739	-1.24302e+06	39.6054	-349.265	3271.91	149.701	-7.757	0	2.52486	0	2.648	0.0805997	0
2000	1249	99.9981	1	1	281.641	-1.24317e+06	39.6022	-349.207	3271.69	149.7	-7.767	0	2.52507	0	2.653	0.0805869	0
2000	1248	99.9981	1	1	281.543	-1.24332e+06	39.5989	-349.149	3271.47	149.7	-7.778	0	2.52527	0	2.657	0.0805742	0
2000	1247	99.9981	1	1	281.444	-1.24347e+06	39.5957	-349.09	3271.25	149.7	-7.789	0	2.52548	0	2.662	0.0805615	0
2000	1246	99.9982	1	1	281.346	-1.24362e+06	39.5925	-349.032	3271.03	149.7	-7.799	0	2.52569	0	2.666	0.0805488	0
2000	1245	99.9982	1	1	281.247	-1.24377e+06	39.5892	-348.974	3270.81	149.7	-7.81	0	2.52589	0	2.671	0.0805362	0
2000	1244	99.9982	1	1	281.149	-1.24392e+06	39.586	-348.916	3270.59	149.699	-7.82	0	2.5261	0	2.676	0.0805235	0
2000	1243	99.9983	1	1	281.05	-1.24407e+06	39.5827	-348.858	3270.36	149.699	-7.831	0	2.52631	0	2.68	0.0805109	0
2000	1242	99.9983	1	1	280.951	-1.24422e+06	39.5795	-348.8	3270.14	149.699	-7.842	0	2.52652	0	2.685	0.0804983	0
2000	1241	99.9984	1	1	280.853	-1.24437e+06	39.5763	-348.742	3269.92	149.699	-7.852	0	2.52672	0	2.69	0.0804857	0
2000	1240	99.9984	1	1	280.754	-1.24452e+06	39.573	-348.684	3269.69	149.699	-7.863	0	2.52693	0	2.694	0.0804731	0
2000	1239	99.9984	1	1	280.655	-1.24467e+06	39.5698	-348.626	3269.47	149.698	-7.874	0	2.52714	0	2.699	0.0804606	0
2000	1238	99.9985	1	1	280.556	-1.24482e+06	39.5666	-348.568	3269.24	149.698	-7.884	0	2.52735	0	2.704	0.0804481	0
2000	1237	99.9985	1	1	280.457	-1.24497e+06	39.5633	-348.51	3269.02	149.698	-7.895	0	2.52756	0	2.709	0.0804356	0
2000	1236	99.9986	1	1	280.358	-1.24512e+06	39.5601	-348.452	3268.79	149.698	-7.906	0	2.52776	0	2.713	0.0804231	0
2000	1235	99.9986	1	1	280.259	-1.24527e+06	39.5569	-348.394	3268.57	149.697	-7.917	0	2.52797	0	2.718	0.0804106	0
2000	1234	99.9986	1	1	280.159	-1.24542e+06	39.5536	-348.336	3268.34	149.697	-7.927	0	2.52818	0	2.723	0.0803982	0
2000	1233	99.9987	1	1	280.06	-1.24557e+06	39.5504	-348.278	3268.11	149.697	-7.938	0	2.52839	0	2.727	0.0803858	0
2000	1232	99.9987	1	1	279.961	-1.24572e+06	39.5472	-348.22	3267.88	149.697	-7.949	0	2.52859	0	2.732	0.0803734	0
2000	1231	99.9988	1	1	279.861	-1.24588e+06	39.5439	-348.163	3267.65	149.697	-7.96	0	2.5288	0	2.737	0.080361	0
2000	1230	99.9988	1	1	279.762	-1.24603e+06	39.5407	-348.105	3267.43	149.696	-7.97	0	2.52901	0	2.742	0.0803487	0
2000	1229	99.9988	1	1	279.662	-1.24618e+06	39.5375	-348.047	3267.2	149.696	-7.981	0	2.52922	0	2.746	0.0803363	0
2000	1228	99.9989	1	1	279.563	-1.24633e+06	39.5342	-347.989	3266.97	149.696	-7.992	0	2.52942	0	2.751	0.080324	0
2000	1227	99.9989	1	1	279.463	-1.24648e+06	39.531	-347.932	3266.73	149.696	-8.003	0	2.52963	0	2.756	0.0803117	0
2000	1226	99.999	1	1	279.363	-1.24663e+06	39.5278	-347.874	3266.5	149.696	-8.014	0	2.52984	0	2.761	0.0802995	0
2000	1225	99.999	1	1	279.264	-1.24678e+06	39.5245	-347.816	3266.27	149.695	-8.025	0	2.53005	0	2.765	0.0802872	0
2000	1224	99.999	1	1	279.164	-1.24693e+06	39.5213	-347.759	3266.04	149.695	-8.036	0	2.53026	0	2.77	0.080275	0
2000	1223	99.9991	1	1	279.064	-1.24708e+06	39.5181	-347.701	3265.81	149.695	-8.047	0	2.53046	0	2.775	0.0802628	0
2000	1222	99.9991	1	1	278.964	-1.24723e+06	39.5148	-347.643	3265.57	149.695	-8.057	0	2.53067	0	2.78	0.0802506	0
2000	1221	99.9992	1	1	278.864	-1.24738e+06	39.5116	-347.586	3265.34	149.695	-8.068	0	2.53088	0	2.784	0.0802385	0
2000	1220	99.9992	1	1	278.764	-1.24753e+06	39.5084	-347.528	3265.1	149.695	-8.079	0	2.53109	0	2.789	0.0802263	0
2000	1219	99.9993	1	1	278.663	-1.24768e+06	39.5052	-347.471	3264.87	149.694	-8.09	0	2.5313	0	2.794	0.0802142	0
2000	1218	99.9993	1	1	278.563	-1.24783e+06	39.5019	-347.413	3264.63	149.694	-8.101	0	2.5315	0	2.799	0.0802021	0
2000	1217	99.9994	1	1	278.463	-1.24798e+06	39.4987	-347.356	3264.4	149.694	-8.112	0	2.53171	0	2.804	0.0801901	0
2000	1216	99.9994	1	1	278.362	-1.24813e+06	39.4955	-347.298	3264.16	149.694	-8.123	0	2.53192	0	2.809	0.080178	0
2000	1215	99.9994	1	1	278.262	-1.24828e+06	39.4923	-347.241	3263.92	149.694	-8.134	0	2.53213	0	2.813	0.080166	0
2000	1214	99.9995	1	1	278.161	-1.24843e+06	39.489	-347.183	3263.68	149.693	-8.145	0	2.53234	0	2.818	0.080154	0
2000	1213	99.9995	1	1	278.061	-1.24858e+06	39.4858	-347.126	3263.44	149.693	-8.156	0	2.53254	0	2.823	0.0801421	0
2000	1212	99.9996	1	1	277.96	-1.24873e+06	39.4826	-347.069	3263.21	149.693	-8.168	0	2.53275	0	2.828	0.0801301	0
2000	1211	99.9996	1	1	277.859	-1.24888e+06	39.4794	-347.011	3262.97	149.693	-8.179	0	2.53296	0	2.833	0.0801182	0
2000	1210	99.9997	1	1	277.758	-1.24903e+06	39.4761	-346.954	3262.73	149.693	-8.19	0	2.53317	0	2.838	0.0801063	0
2000	1209	99.9997	1	1	277.658	-1.24918e+06	39.4729	-346.897	3262.49	149.693	-8.201	0	2.53338	0	2.843	0.0800944	0
2000	1208	99.9998	1	1	277.557	-1.24933e+06	39.4697	-346.839	3262.24	149.692	-8.212	0	2.53358	0	2.847	0.0800826	0
2000	1207	99.9998	1	1	277.456	-1.24948e+06	39.4665	-346.782	3262	149.692	-8.223	0	2.53379	0	2.852	0.0800708	0
2000	1206	99.9999	1	1	277.357	-1.24963e+06	39.4632	-346.725	3261.76	145.013	-8.234	0	2.534	0	2.857	0.080059	0
2000	1205	99.9999	1	1	277.259	-1.24978e+06	39.46	-346.668	3261.52	145.012	-8.245	0	2.53421	0	2.862	0.0800472	0
2000	1204	99.9999	1	1	277.161	-1.24992e+06	39.4568	-346.61	3261.27	145.011	-8.257	0	2.53442	0	2.867	0.0800355	0
2000	1203	100	1	1	277.063	-1.25007e+06	39.4536	-346.553	3261.03	145.009	-8.268	0	2.53462	0	2.872	0.0800237	0
2000	1202	100	1	1	276.965	-1.25021e+06	39.4504	-346.496	3260.79	145.008	-8.279	0	2.53483	0	2.877	0.080012	0
2000	1201	100	1	1	276.867	-1.25036e+06	39.4471	-346.439	3260.54	145.007	-8.29	0	2.53504	0	2.882	0.0800004	0
2000	1200	100	1	1	276.768	-1.2505e+06	39.4439	-346.382	3260.3	145.006	-8.302	0	2.53525	0	2.887	0.0799887	0
2000	1199	100	1	1	276.67	-1.25065e+06	39.4407	-346.325	3260.05	145.004	-8.313	0	2.53546	0	2.892	0.0799771	0
2000	1198	100	1	1	276.572	-1.2508e+06	39.4375	-346.268	3259.8	145.003	-8.324	0	2.53566	0	2.897	0.0799655	0
2000	1197	100	1	1	276.473	-1.25094e+06	39.4343	-346.211	3259.56	145.002	-8.335	0	2.53587	0	2.902	0.079954	0
2000	1196	100	1	1	276.374	-1.25109e+06	39.431	-346.154	3259.31	145	-8.347	0	2.53608	0	2.907	0.0799424	0
2000	1195	100	1	1	276.276	-1.25123e+06	39.4278	-346.097	3259.06	144.999	-8.358	0	2.53629	0	2.911	0.0799309	0
2000	1194	100	1	1	276.177	-1.25138e+06	39.4246	-346.04	3258.81	144.998	-8.369	0	2.5365	0	2.916	0.0799194	0
2000	1193	100	1	1	276.078	-1.25152e+06	39.4214	-345.983	3258.56	144.996	-8.381	0	2.53671	0	2.921	0.079908	0
2000	1192	100.001	1	1	275.979	-1.25167e+06	39.4182	-345.926	3258.31	144.995	-8.392	0	2.53691	0	2.926	0.0798965	0
2000	1191	100.001	1	1	275.881	-1.25182e+06	39.415	-345.869	3258.06	144.994	-8.404	0	2.53712	0	2.931	0.0798851	0
2000	1190	100.001	1	1	275.782	-1.25196e+06	39.4117	-345.813	3257.81	144.992	-8.415	0	2.53733	0	2.936	0.0798737	0
2000	1189	100.001	1	1	275.683	-1.25211e+06	39.4085	-345.756	3257.56	144.991	-8.426	0	2.53754	0	2.941	0.0798624	0
2000	1188	100.001	1	1	275.583	-1.25225e+06	39.4053	-345.699	3257.31	144.99	-8.438	0	2.53775	0	2.946	0.0798511	0
2000	1187	100.001	1	1	275.484	-1.2524e+06	39.4021	-345.642	3257.06	144.988	-8.449	0	2.53796	0	2.951	0.0798398	0
2000	1186	100.001	1	1	275.385	-1.25254e+06	39.3989	-345.586	3256.8	144.987	-8.461	0	2.53816	0	2.956	0.0798285	0
2000	1185	100.001	1	1	275.286	-1.25269e+06	39.3957	-345.529	3256.55	144.985	-8.472	0	2.53837	0	2.962	0.0798173	0
2000	1184	100.001	1	1	275.186	-1.25284e+06	39.3925	-345.472	3256.3	144.984	-8.484	0	2.53858	0	2.967	0.0798061	0
2000	1183	100.001	1	1	275.087	-1.25298e+06	39.3892	-345.416	3256.04	144.983	-8.495	0	2.53879	0	2.972	0.0797949	0
2000	1182	100.001	1	1	274.987	-1.25313e+06	39.386	-345.359	3255.79	144.981	-8.507	0	2.539	0	2.977	0.0797837	0
2000	1181	100.001	1	1	274.888	-1.25327e+06	39.3828	-345.302	3255.53	144.98	-8.518	0	2.53921	0	2.982	0.0797726	0
2000	1180	100.001	1	1	274.788	-1.25342e+06	39.3796	-345.246	3255.27	144.978	-8.53	0	2.53941	0	2.987	0.0797615	0
2000	1179	100.001	1	1	274.688	-1.25356e+06	39.3764	-345.189	3255.02	144.977	-8.542	0	2.53962	0	2.992	0.0797505	0
2000	1178	100.001	1	1	274.589	-1.25371e+06	39.3732	-345.133	3254.76	144.976	-8.553	0	2.53983	0	2.997	0.0797394	0
2000	1177	100.001	1	1	274.489	-1.25386e+06	39.37	-345.076	3254.5	144.974	-8.565	0	2.54004	0	3.002	0.0797284	0
2000	1176	100.001	1	1	274.389	-1.254e+06	39.3668	-345.02	3254.25	144.973	-8.576	0	2.54025	0	3.007	0.0797175	0
2000	1175	100.001	1	1	274.289	-1.25415e+06	39.3636	-344.963	3253.99	144.971	-8.588	0	2.54046	0	3.012	0.0797065	0
2000	1174	100.001	1	1	274.189	-1.25429e+06	39.3604	-344.907	3253.73	144.97	-8.6	0	2.54067	0	3.017	0.0796956	0
2000	1173	100.001	0.998026	0.998446	274.04	-1.25451e+06	39.3476	-344.59	3251.01	144.901	-8.611	0	2.54042	3.22853	3.026	0.0798358	0
2000	1172	99.805	0.99873	0.999001	273.435	-1.2522e+06	39.2775	-344.32	3246.6	144.608	-8.623	0	2.54033	3.22911	3.034	0.0799212	0
2000	1171	99.6791	0.998733	0.999003	273.001	-1.25079e+06	39.2293	-344.068	3243.13	144.405	-8.635	0	2.54025	3.22968	3.042	0.0800064	0
2000	1170	99.5537	0.993583	0.994286	272.453	-1.24955e+06	39.1698	-342.912	3233.32	144.072	-8.646	0	2.53979	2.85454	3.048	0.0808114	0
2000	1169	98.9165	0.989935	0.990944	270.583	-1.24151e+06	38.918	-340.887	3214	143.015	-8.658	0	2.53908	2.82467	3.053	0.0821431	0
2000	1168	97.9227	0.990036	0.991036	267.853	-1.22864e+06	38.5382	-338.727	3191.38	141.523	-8.67	0	2.53836	2.82463	3.058	0.0834807	0
2000	1167	96.9487	0.990134	0.991127	265.177	-1.21604e+06	38.1658	-336.606	3169.21	140.06	-8.682	0	2.53765	2.82459	3.063	0.084824	0
2000	1166	95.9939	0.99023	0.991216	262.554	-1.20368e+06	37.8008	-334.524	3147.46	138.627	-8.694	0	2.53694	2.82456	3.068	0.0861729	0
2000	1165	95.0578	0.990325	0.991304	259.982	-1.19157e+06	37.4429	-332.48	3126.14	137.222	-8.705	0	2.53623	2.82452	3.073	0.0875274	0
2000	1164	94.1398	0.990418	0.99139	257.459	-1.1797e+06	37.0919	-330.472	3105.23	135.844	-8.717	0	2.53553	2.82449	3.078	0.0888874	0
2000	1163	93.2395	0.989464	0.990792	254.947	-1.16811e+06	36.7396	-328.477	3083.78	134.444	-8.729	0	2.53445	2.90383	3.086	0.090332	0
2000	1162	92.2599	0.989838	0.991063	252.283	-1.15556e+06	36.3714	-326.522	3061.34	132.981	-8.741	0	2.53347	2.88418	3.093	0.0917607	0
2000	1161	91.3251	0.98995	0.991163	249.727	-1.14357e+06	36.0171	-324.606	3039.8	131.575	-8.753	0	2.5325	2.88361	3.1	0.0931935	0
2000	1160	90.4101	0.99006	0.991261	247.225	-1.13184e+06	35.6702	-322.726	3018.7	130.199	-8.765	0	2.53154	2.88304	3.107	0.0946306	0
2000	1159	89.5142	0.990167	0.991357	244.775	-1.12035e+06	35.3305	-320.881	2998.04	128.852	-8.777	0	2.53058	2.88247	3.114	0.0960716	0
2000	1158	88.6367	0.990272	0.991451	242.375	-1.1091e+06	34.9977	-319.069	2977.8	127.533	-8.789	0	2.52963	2.88189	3.121	0.0975167	0
2000	1157	87.7772	0.990375	0.991543	240.024	-1.09809e+06	34.6717	-317.291	2957.98	126.241	-8.8	0	2.52868	2.88131	3.128	0.0989657	0
2000	1156	86.935	0.990207	0.991416	237.717	-1.0873e+06	34.3516	-315.508	2938.2	124.97	-8.812	0	2.52765	2.88731	3.135	0.100454	0
2000	1155	86.0864	0.990252	0.991456	235.398	-1.07647e+06	34.0304	-313.74	2918.55	123.697	-8.824	0	2.52662	2.88593	3.142	0.101957	0
2000	1154	85.25	0.990354	0.991547	233.113	-1.0658e+06	33.7138	-312.001	2899.24	122.444	-8.836	0	2.5256	2.88538	3.148	0.103463	0
2000	1153	84.4304	0.990454	0.991636	230.874	-1.05535e+06	33.4035	-310.293	2880.32	121.216	-8.848	0	2.52458	2.88482	3.155	0.104973	0
2000	1152	83.6272	0.990551	0.991723	228.679	-1.04511e+06	33.0994	-308.616	2861.77	120.014	-8.86	0	2.52356	2.88427	3.162	0.106486	0
2000	1151	82.8397	0.990647	0.991809	226.527	-1.03507e+06	32.8011	-306.968	2843.58	118.835	-8.872	0	2.52256	2.8837	3.169	0.108004	0
2000	1150	82.0677	0.990741	0.991892	224.417	-1.02523e+06	32.5086	-305.348	2825.75	117.679	-8.885	0	2.52156	2.88314	3.176	0.109525	0
2000	1149	81.3105	0.990832	0.991974	222.347	-1.01558e+06	32.2217	-303.756	2808.26	116.546	-8.897	0	2.52056	2.88258	3.182	0.111051	0
2000	1148	80.5679	0.990922	0.992055	220.316	-1.00611e+06	31.9403	-302.19	2791.09	115.435	-8.909	0	2.51958	2.88201	3.189	0.112579	0
2000	1147	79.8393	0.991011	0.992134	218.324	-996829	31.6641	-300.651	2774.25	114.346	-8.921	0	2.51859	2.88144	3.196	0.114111	0
2000	1146	79.1243	0.991097	0.992211	216.368	-987720	31.393	-299.136	2757.72	113.277	-8.933	0	2.51762	2.88087	3.202	0.115647	0
2000	1145	78.4226	0.991182	0.992287	214.449	-978782	31.1269	-297.647	2741.5	112.228	-8.945	0	2.51665	2.88029	3.209	0.117186	0
2000	1144	77.7339	0.991265	0.992361	212.565	-970009	30.8656	-296.181	2725.57	111.199	-8.957	0	2.51568	2.87972	3.215	0.118729	0
2000	1143	77.0576	0.991346	0.992433	210.714	-961396	30.609	-294.738	2709.93	110.188	-8.969	0	2.51472	2.87914	3.221	0.120274	0
2000	1142	76.3936	0.991426	0.992505	208.897	-952941	30.357	-293.318	2694.56	109.196	-8.982	0	2.51377	2.87856	3.228	0.121823	0
2000	1141	75.7414	0.991505	0.992575	207.112	-944637	30.1095	-291.921	2679.47	108.223	-8.994	0	2.51282	2.87798	3.234	0.123376	0
2000	1140	75.1007	0.991582	0.992643	205.358	-936481	29.8662	-290.544	2664.64	107.266	-9.006	0	2.51188	2.8774	3.24	0.124931	0
2000	1139	74.4713	0.991657	0.992711	203.635	-928469	29.6272	-289.189	2650.07	106.327	-9.018	0	2.51095	2.87681	3.246	0.12649	0
2000	1138	73.8528	0.991732	0.992777	201.941	-920598	29.3923	-287.853	2635.75	105.404	-9.031	0	2.51002	2.87623	3.253	0.128051	0
2000	1137	73.245	0.991804	0.992842	200.277	-912862	29.1613	-286.538	2621.67	104.497	-9.043	0	2.50909	2.87564	3.259	0.129616	0
2000	1136	72.6475	0.991876	0.992905	198.64	-905260	28.9343	-285.242	2607.82	103.606	-9.055	0	2.50818	2.87506	3.265	0.131184	0
2000	1135	72.0601	0.991946	0.992968	197.031	-897787	28.711	-283.964	2594.21	102.731	-9.067	0	2.50726	2.87447	3.271	0.132754	0
2000	1134	71.4825	0.992015	0.993029	195.448	-890440	28.4914	-282.705	2580.83	101.87	-9.08	0	2.50636	2.87388	3.277	0.134327	0
2000	1133	70.9145	0.992083	0.993089	193.892	-883215	28.2754	-281.464	2567.66	101.023	-9.092	0	2.50545	2.87329	3.283	0.135904	0
2000	1132	70.3559	0.992149	0.993148	192.361	-876111	28.0629	-280.24	2554.7	100.191	-9.105	0	2.50456	2.8727	3.289	0.137483	0
2000	1131	69.8063	0.992214	0.993206	190.854	-869123	27.8538	-279.033	2541.96	99.3728	-9.117	0	2.50367	2.87211	3.294	0.139065	0
2000	1130	69.2657	0.992278	0.993263	189.372	-862248	27.648	-277.843	2529.41	98.5678	-9.129	0	2.50278	2.87151	3.3	0.140649	0
2000	1129	68.7337	0.992341	0.993319	187.913	-855485	27.4455	-276.668	2517.07	97.7759	-9.142	0	2.5019	2.87092	3.306	0.142237	0
2000	1128	68.2101	0.992403	0.993374	186.477	-848829	27.2462	-275.51	2504.92	96.9968	-9.154	0	2.50102	2.87033	3.312	0.143827	0
2000	1127	67.6947	0.992464	0.993428	185.064	-842279	27.0499	-274.367	2492.95	96.2301	-9.167	0	2.50015	2.86973	3.317	0.145419	0
2000	1126	67.1874	0.992524	0.993481	183.672	-835832	26.8567	-273.239	2481.17	95.4756	-9.179	0	2.49929	2.86914	3.323	0.147014	0
2000	1125	66.688	0.992583	0.993534	182.302	-829486	26.6664	-272.126	2469.57	94.733	-9.192	0	2.49843	2.86854	3.328	0.148612	0
2000	1124	66.1962	0.992641	0.993585	180.952	-823237	26.479	-271.027	2458.14	94.0019	-9.204	0	2.49758	2.86795	3.334	0.150212	0
2000	1123	65.7118	0.992697	0.993635	179.623	-817084	26.2943	-269.942	2446.88	93.2821	-9.217	0	2.49673	2.86735	3.339	0.151815	0
2000	1122	65.2348	0.992753	0.993685	178.314	-811025	26.1125	-268.871	2435.8	92.5734	-9.229	0	2.49588	2.86676	3.345	0.15342	0
2000	1121	64.7649	0.992808	0.993734	177.024	-805057	25.9332	-267.813	2424.87	91.8755	-9.242	0	2.49505	2.86617	3.35	0.155028	0
2000	1120	64.302	0.992862	0.993782	175.753	-799178	25.7566	-266.768	2414.1	91.1881	-9.254	0	2.49421	2.86557	3.356	0.156638	0
2000	1119	63.8458	0.992915	0.993829	174.5	-793386	25.5826	-265.736	2403.49	90.5109	-9.267	0	2.49338	2.86497	3.361	0.158251	0
2000	1118	63.3964	0.992968	0.993875	173.266	-787679	25.4111	-264.717	2393.03	89.8439	-9.28	0	2.49256	2.86438	3.366	0.159866	0
2000	1117	62.9534	0.993019	0.993921	172.049	-782056	25.2419	-263.709	2382.72	89.1866	-9.292	0	2.49174	2.86379	3.372	0.161483	0
2000	1116	62.5168	0.99307	0.993965	170.85	-776514	25.0752	-262.714	2372.55	88.539	-9.305	0	2.49092	2.86319	3.377	0.163102	0
2000	1115	62.0864	0.99312	0.99401	169.667	-771051	24.9108	-261.73	2362.52	87.9007	-9.318	0	2.49011	2.8626	3.382	0.164724	0
2000	1114	61.662	0.993169	0.994053	168.501	-765666	24.7487	-260.758	2352.64	87.2717	-9.33	0	2.48931	2.86201	3.387	0.166348	0
2000	1113	61.2436	0.993217	0.994096	167.351	-760357	24.5888	-259.797	2342.89	86.6516	-9.343	0	2.48851	2.86142	3.392	0.167974	0
2000	1112	60.8311	0.993264	0.994138	166.217	-755122	24.4311	-258.847	2333.27	86.0402	-9.356	0	2.48771	2.86083	3.397	0.169603	0
2000	1111	60.4242	0.993311	0.994179	165.098	-749960	24.2756	-257.908	2323.78	85.4375	-9.368	0	2.48692	2.86023	3.402	0.171234	0
2000	1110	60.0228	0.993357	0.99422	163.995	-744870	24.1221	-256.979	2314.42	84.8432	-9.381	0	2.48613	2.85964	3.407	0.172866	0
2000	1109	59.627	0.993402	0.99426	162.906	-739848	23.9707	-256.06	2305.18	84.2571	-9.394	0	2.48535	2.85906	3.412	0.174501	0
2000	1108	59.2364	0.993447	0.994299	161.832	-734895	23.8212	-255.152	2296.06	83.679	-9.407	0	2.48457	2.85847	3.417	0.176138	0
2000	1107	58.8511	0.993491	0.994338	160.772	-730009	23.6738	-254.253	2287.07	83.1089	-9.42	0	2.4838	2.85788	3.422	0.177778	0
2000	1106	58.4709	0.993534	0.994376	159.726	-725188	23.5282	-253.364	2278.19	82.5464	-9.432	0	2.48303	2.8573	3.426	0.179419	0
2000	1105	58.0957	0.993576	0.994414	158.694	-720432	23.3846	-252.484	2269.42	81.9915	-9.445	0	2.48227	2.85671	3.431	0.181062	0
2000	1104	57.7253	0.993618	0.994451	157.675	-715737	23.2427	-251.614	2260.76	81.444	-9.458	0	2.48151	2.85613	3.436	0.182708	0
2000	1103	57.3598	0.99366	0.994487	156.669	-711104	23.1027	-250.753	2252.22	80.9037	-9.471	0	2.48075	2.85555	3.441	0.184355	0
2000	1102	56.999	0.9937	0.994523	155.675	-706532	22.9644	-249.901	2243.78	80.3705	-9.484	0	2.48	2.85497	3.445	0.186005	0
2000	1101	56.6428	0.99374	0.994559	154.695	-702018	22.8279	-249.057	2235.45	79.8443	-9.497	0	2.47926	2.85439	3.45	0.187656	0
2000	1100	56.2911	0.99378	0.994593	153.726	-697561	22.6931	-248.222	2227.22	79.3249	-9.51	0	2.47851	2.85381	3.454	0.189309	0
2000	1099	55.9438	0.993819	0.994628	152.77	-693162	22.5599	-247.396	2219.09	78.8122	-9.523	0	2.47777	2.85324	3.459	0.190965	0
2000	1098	55.6009	0.993857	0.994662	151.826	-688817	22.4283	-246.577	2211.05	78.306	-9.536	0	2.47704	2.85266	3.463	0.192622	0
2000	1097	55.2622	0.993895	0.994695	150.893	-684527	22.2984	-245.767	2203.12	77.8062	-9.549	0	2.47631	2.85209	3.468	0.194281	0
2000	1096	54.9277	0.993932	0.994728	149.971	-680291	22.17	-244.965	2195.28	77.3127	-9.562	0	2.47559	2.85152	3.472	0.195942	0
2000	1095	54.5973	0.993969	0.99476	149.061	-676106	22.0432	-244.17	2187.53	76.8253	-9.575	0	2.47486	2.85095	3.477	0.197605	0
2000	1094	54.2709	0.994005	0.994792	148.161	-671973	21.9178	-243.384	2179.88	76.344	-9.588	0	2.47415	2.85038	3.481	0.19927	0
2000	1093	53.9484	0.99404	0.994823	147.273	-667890	21.794	-242.604	2172.31	75.8687	-9.601	0	2.47343	2.84982	3.485	0.200937	0
2000	1092	53.6298	0.994076	0.994854	146.394	-663856	21.6716	-241.832	2164.83	75.3991	-9.614	0	2.47272	2.84926	3.489	0.202605	0
2000	1091	53.3149	0.99411	0.994885	145.527	-659871	21.5506	-241.067	2157.44	74.9353	-9.627	0	2.47202	2.8487	3.494	0.204276	0
2000	1090	53.0038	0.994144	0.994915	144.669	-655933	21.431	-240.31	2150.13	74.477	-9.64	0	2.47131	2.84814	3.498	0.205948	0
2000	1089	52.6963	0.994178	0.994945	143.821	-652042	21.3128	-239.559	2142.9	74.0242	-9.654	0	2.47062	2.84758	3.502	0.207622	0
2000	1088	52.3924	0.994211	0.994974	142.983	-648196	21.1959	-238.815	2135.76	73.5768	-9.667	0	2.46992	2.84703	3.506	0.209297	0
2000	1087	52.092	0.994244	0.995003	142.154	-644395	21.0804	-238.078	2128.69	73.1347	-9.68	0	2.46923	2.84648	3.51	0.210975	0
2000	1086	51.7951	0.994276	0.995031	141.335	-640638	20.9661	-237.347	2121.71	72.6978	-9.693	0	2.46854	2.84593	3.514	0.212654	0
2000	1085	51.5015	0.994308	0.99506	140.525	-636924	20.8531	-236.623	2114.8	72.266	-9.706	0	2.46786	2.84539	3.518	0.214335	0
2000	1084	51.2112	0.99434	0.995087	139.724	-633253	20.7414	-235.905	2107.96	71.8392	-9.72	0	2.46718	2.84484	3.522	0.216018	0
2000	1083	50.9243	0.994371	0.995115	138.933	-629623	20.6309	-235.194	2101.2	71.4173	-9.733	0	2.46651	2.8443	3.526	0.217702	0
2000	1082	50.6405	0.994401	0.995142	138.149	-626035	20.5216	-234.488	2094.52	71.0002	-9.746	0	2.46583	2.84376	3.53	0.219388	0
2000	1081	50.3598	0.994431	0.995168	137.375	-622486	20.4135	-233.789	2087.9	70.5879	-9.76	0	2.46517	2.84323	3.534	0.221076	0
2000	1080	50.0823	0.994461	0.995194	136.609	-618977	20.3065	-233.095	2081.35	70.1802	-9.773	0	2.4645	2.8427	3.538	0.222765	0
2000	1079	49.8078	0.99449	0.99522	135.851	-615507	20.2007	-232.408	2074.88	69.7771	-9.786	0	2.46384	2.84217	3.542	0.224457	0
2000	1078	49.5363	0.994519	0.995246	135.101	-612074	20.096	-231.726	2068.47	69.3784	-9.8	0	2.46318	2.84164	3.545	0.226149	0
2000	1077	49.2677	0.994548	0.995271	134.359	-608680	19.9924	-231.05	2062.12	68.9842	-9.813	0	2.46253	2.84112	3.549	0.227844	0
2000	1076	49.002	0.994576	0.995296	133.625	-605321	19.8899	-230.379	2055.84	68.5943	-9.827	0	2.46188	2.8406	3.553	0.22954	0
2000	1075	48.7391	0.994604	0.99532	132.899	-602000	19.7885	-229.714	2049.63	68.2087	-9.84	0	2.46123	2.84008	3.556	0.231237	0
2000	1074	48.479	0.994631	0.995345	132.181	-598713	19.6881	-229.054	2043.48	67.8273	-9.853	0	2.46059	2.83957	3.56	0.232936	0
2000	1073	48.2216	0.994658	0.995368	131.47	-595462	19.5887	-228.399	2037.39	67.4499	-9.867	0	2.45995	2.83906	3.564	0.234637	0
2000	1072	47.9669	0.994685	0.995392	130.766	-592245	19.4904	-227.75	2031.36	67.0766	-9.88	0	2.45931	2.83855	3.567	0.236339	0
2000	1071	47.7149	0.994712	0.995415	130.07	-589061	19.393	-227.106	2025.39	66.7073	-9.894	0	2.45867	2.83805	3.571	0.238043	0
2000	1070	47.4655	0.994738	0.995438	129.38	-585911	19.2967	-226.467	2019.48	66.3419	-9.907	0	2.45804	2.83755	3.574	0.239749	0
2000	1069	47.2186	0.994763	0.995461	128.698	-582794	19.2013	-225.832	2013.63	65.9804	-9.921	0	2.45742	2.83705	3.578	0.241456	0
2000	1068	46.9743	0.994789	0.995483	128.022	-579708	19.1068	-225.203	2007.83	65.6226	-9.935	0	2.45679	2.83656	3.581	0.243164	0
2000	1067	46.7324	0.994814	0.995506	127.354	-576654	19.0133	-224.578	2002.09	65.2685	-9.948	0	2.45617	2.83607	3.584	0.244874	0
2000	1066	46.4929	0.994839	0.995527	126.692	-573632	18.9207	-223.958	1996.41	64.9181	-9.962	0	2.45555	2.83559	3.588	0.246585	0
2000	1065	46.2559	0.994863	0.995549	126.036	-570639	18.829	-223.343	1990.78	64.5713	-9.975	0	2.45494	2.8351	3.591	0.248298	0
2000	1064	46.0212	0.994887	0.99557	125.387	-567677	18.7382	-222.732	1985.2	64.2281	-9.989	0	2.45433	2.83463	3.594	0.250013	0
2000	1063	45.7888	0.994911	0.995591	124.744	-564745	18.6482	-222.126	1979.68	63.8883	-10.003	0	2.45372	2.83415	3.598	0.251728	0
2000	1062	45.5587	0.994935	0.995612	124.108	-561841	18.5592	-221.525	1974.2	63.5519	-10.016	0	2.45311	2.83368	3.601	0.253446	0
2000	1061	45.3309	0.994958	0.995633	123.478	-558967	18.4709	-220.927	1968.78	63.219	-10.03	0	2.45251	2.83322	3.604	0.255164	0
2000	1060	45.1052	0.994981	0.995653	122.853	-556120	18.3835	-220.334	1963.41	62.8893	-10.044	0	2.45191	2.83276	3.607	0.256885	0
2000	1059	44.8818	0.995004	0.995673	122.235	-553301	18.297	-219.745	1958.08	62.5629	-10.058	0	2.45132	2.8323	3.61	0.258606	0
2000	1058	44.6605	0.995026	0.995693	121.622	-550510	18.2112	-219.161	1952.81	62.2397	-10.071	0	2.45072	2.83185	3.614	0.260329	0
2000	1057	44.4412	0.995048	0.995712	121.016	-547745	18.1262	-218.58	1947.58	61.9197	-10.085	0	2.45013	2.8314	3.617	0.262053	0
2000	1056	44.2241	0.99507	0.995732	120.415	-545007	18.042	-218.004	1942.4	61.6028	-10.099	0	2.44954	2.83095	3.62	0.263779	0
2000	1055	44.009	0.995092	0.995751	119.819	-542295	17.9586	-217.431	1937.26	61.2889	-10.113	0	2.44896	2.83052	3.623	0.265506	0
2000	1054	43.7959	0.995113	0.99577	119.229	-539609	17.876	-216.863	1932.17	60.9781	-10.127	0	2.44838	2.83008	3.626	0.267235	0
2000	1053	43.5848	0.995134	0.995788	118.645	-536948	17.794	-216.298	1927.13	60.6702	-10.141	0	2.4478	2.82965	3.629	0.268964	0
2000	1052	43.3757	0.995155	0.995807	118.066	-534312	17.7129	-215.737	1922.12	60.3653	-10.155	0	2.44722	2.82922	3.632	0.270695	0
2000	1051	43.1685	0.995176	0.995825	117.492	-531700	17.6324	-215.18	1917.17	60.0633	-10.169	0	2.44665	2.8288	3.634	0.272428	0
2000	1050	42.9631	0.995196	0.995843	116.923	-529113	17.5527	-214.627	1912.25	59.7641	-10.183	0	2.44608	2.82838	3.637	0.274162	0
2000	1049	42.7597	0.995216	0.995861	116.36	-526550	17.4737	-214.077	1907.37	59.4677	-10.196	0	2.44551	2.82797	3.64	0.275897	0
2000	1048	42.558	0.995236	0.995878	115.801	-524010	17.3953	-213.531	1902.54	59.174	-10.21	0	2.44494	2.82756	3.643	0.277633	0
2000	1047	42.3582	0.995256	0.995895	115.248	-521493	17.3177	-212.989	1897.75	58.8831	-10.224	0	2.44438	2.82716	3.646	0.27937	0
2000	1046	42.1602	0.995275	0.995913	114.699	-518998	17.2407	-212.45	1893	58.5948	-10.239	0	2.44382	2.82677	3.649	0.281109	0
2000	1045	41.9639	0.995294	0.99593	114.155	-516527	17.1644	-211.914	1888.28	58.3092	-10.253	0	2.44326	2.82637	3.651	0.282849	0
2000	1044	41.7694	0.995313	0.995946	113.616	-514077	17.0888	-211.382	1883.61	58.0262	-10.267	0	2.44271	2.82599	3.654	0.284591	0
2000	1043	41.5765	0.995332	0.995963	113.082	-511649	17.0138	-210.853	1878.97	57.7457	-10.281	0	2.44215	2.8256	3.657	0.286333	0
2000	1042	41.3854	0.995351	0.995979	112.552	-509243	16.9394	-210.328	1874.37	57.4678	-10.295	0	2.4416	2.82523	3.659	0.288077	0
2000	1041	41.1959	0.995369	0.995996	112.027	-506858	16.8657	-209.806	1869.81	57.1923	-10.309	0	2.44105	2.82486	3.662	0.289822	0
2000	1040	41.0081	0.995362	0.995997	111.506	-504495	16.7925	-209.286	1865.26	56.919	-10.323	0	2.44049	2.82908	3.664	0.291575	0
2000	1039	40.8215	0.995358	0.996001	110.988	-502148	16.7199	-208.77	1860.73	56.6476	-10.337	0	2.43992	2.83384	3.667	0.293332	0
2000	1038	40.636	0.995368	0.996012	110.474	-499818	16.6478	-208.256	1856.23	56.378	-10.352	0	2.43935	2.83537	3.67	0.295089	0
2000	1037	40.4517	0.995385	0.996028	109.964	-497506	16.5761	-207.745	1851.77	56.1105	-10.366	0	2.43879	2.83519	3.672	0.296848	0
2000	1036	40.269	0.995401	0.996042	109.458	-495213	16.5051	-207.238	1847.34	55.8453	-10.38	0	2.43822	2.83502	3.675	0.298609	0
2000	1035	40.0878	0.995418	0.996057	108.956	-492941	16.4346	-206.733	1842.94	55.5823	-10.394	0	2.43766	2.83486	3.678	0.300371	0
2000	1034	39.9081	0.995434	0.996072	108.458	-490687	16.3647	-206.232	1838.58	55.3216	-10.409	0	2.4371	2.83471	3.68	0.302134	0
2000	1033	39.7298	0.99545	0.996086	107.964	-488452	16.2954	-205.733	1834.24	55.0631	-10.423	0	2.43654	2.83458	3.683	0.303898	0
2000	1032	39.553	0.995465	0.9961	107.474	-486236	16.2266	-205.238	1829.94	54.8067	-10.437	0	2.43598	2.83446	3.685	0.305664	0
2000	1031	39.3776	0.995481	0.996114	106.988	-484038	16.1584	-204.745	1825.68	54.5525	-10.452	0	2.43543	2.83435	3.688	0.307431	0
2000	1030	39.2036	0.995496	0.996128	106.505	-481858	16.0907	-204.255	1821.44	54.3004	-10.466	0	2.43487	2.83425	3.69	0.3092	0
2000	1029	39.031	0.995511	0.996142	106.027	-479696	16.0235	-203.768	1817.23	54.0504	-10.48	0	2.43432	2.83417	3.693	0.310969	0
2000	1028	38.8597	0.995526	0.996155	105.552	-477552	15.9568	-203.283	1813.05	53.8024	-10.495	0	2.43377	2.8341	3.695	0.312741	0
2000	1027	38.6898	0.99554	0.996168	105.081	-475425	15.8907	-202.802	1808.9	53.5564	-10.509	0	2.43322	2.83405	3.697	0.314513	0
2000	1026	38.5212	0.995554	0.996181	104.614	-473315	15.825	-202.323	1804.78	53.3124	-10.524	0	2.43267	2.83401	3.7	0.316287	0
2000	1025	38.3539	0.995568	0.996194	104.15	-471221	15.7599	-201.846	1800.69	53.0703	-10.538	0	2.43212	2.83398	3.702	0.318062	0
2000	1024	38.1879	0.995582	0.996207	103.69	-469145	15.6952	-201.373	1796.63	52.8302	-10.553	0	2.43157	2.83397	3.704	0.319839	0
2000	1023	38.0232	0.995596	0.99622	103.234	-467085	15.6311	-200.901	1792.62	52.5929	-10.567	0	2.43102	2.83398	3.707	0.321617	0
2000	1022	37.8597	0.995609	0.996232	102.78	-465040	15.5674	-200.433	1788.61	52.3566	-10.582	0	2.43047	2.834	3.709	0.323396	0
2000	1021	37.6974	0.995622	0.996244	102.331	-463012	15.5041	-199.967	1784.63	52.122	-10.596	0	2.42993	2.83404	3.711	0.325177	0
2000	1020	37.5364	0.995635	0.996256	101.884	-461000	15.4414	-199.503	1780.67	51.8893	-10.611	0	2.42938	2.83409	3.714	0.326959	0
2000	1019	37.3765	0.995647	0.996267	101.441	-459003	15.3791	-199.042	1776.74	51.6584	-10.626	0	2.42883	2.83416	3.716	0.328743	0
2000	1018	37.2178	0.99566	0.996279	101.001	-457021	15.3172	-198.583	1772.83	51.4292	-10.64	0	2.42829	2.83425	3.718	0.330528	0
2000	1017	37.0602	0.995672	0.99629	100.564	-455054	15.2558	-198.127	1768.95	51.2018	-10.655	0	2.42774	2.83436	3.72	0.332315	0
2000	1016	36.9038	0.995684	0.996301	100.13	-453102	15.1948	-197.673	1765.09	50.976	-10.67	0	2.4272	2.83448	3.722	0.334103	0
2000	1015	36.7485	0.995695	0.996312	99.6998	-451164	15.1343	-197.221	1761.26	50.7519	-10.684	0	2.42665	2.83463	3.724	0.335892	0
2000	1014	36.5943	0.995707	0.996323	99.2723	-449241	15.0742	-196.771	1757.45	50.5295	-10.699	0	2.42611	2.8348	3.727	0.337683	0
2000	1013	36.4412	0.995718	0.996334	98.8478	-447332	15.0145	-196.324	1753.66	50.3087	-10.714	0	2.42557	2.83499	3.729	0.339476	0
2000	1012	36.2891	0.995729	0.996344	98.4262	-445437	14.9552	-195.879	1749.89	50.0895	-10.729	0	2.42502	2.8352	3.731	0.341269	0
2000	1011	36.1381	0.995739	0.996354	98.0076	-443556	14.8963	-195.436	1746.15	49.8719	-10.744	0	2.42448	2.83543	3.733	0.343065	0
2000	1010	35.9881	0.99575	0.996364	97.5918	-441688	14.8379	-194.996	1742.43	49.6559	-10.758	0	2.42393	2.83569	3.735	0.344862	0
2000	1009	35.8392	0.99576	0.996374	97.1788	-439834	14.7798	-194.557	1738.73	49.4413	-10.773	0	2.42338	2.83598	3.737	0.34666	0
2000	1008	35.6912	0.995769	0.996384	96.7686	-437993	14.7221	-194.121	1735.04	49.2283	-10.788	0	2.42283	2.83631	3.739	0.34846	0
2000	1007	35.5442	0.995779	0.996393	96.3611	-436165	14.6648	-193.686	1731.38	49.0167	-10.803	0	2.42229	2.83666	3.741	0.350262	0
2000	1006	35.3982	0.995788	0.996402	95.9564	-434349	14.6079	-193.254	1727.74	48.8066	-10.818	0	2.42174	2.83706	3.743	0.352065	0
2000	1005	35.2531	0.995797	0.996411	95.5542	-432546	14.5513	-192.824	1724.12	48.5979	-10.833	0	2.42118	2.83751	3.745	0.353871	0
2000	1004	35.1089	0.995805	0.99642	95.1546	-430756	14.4951	-192.395	1720.52	48.3906	-10.848	0	2.42063	2.83803	3.747	0.355677	0
2000	1003	34.9657	0.995812	0.996428	94.7576	-428978	14.4392	-191.969	1716.93	48.1847	-10.863	0	2.42008	2.83864	3.749	0.357486	0
2000	1002	34.8233	0.995819	0.996435	94.3629	-427211	14.3838	-191.544	1713.36	47.98	-10.878	0	2.41952	2.83938	3.751	0.359297	0
2000	1001	34.6817	0.995824	0.996442	93.9706	-425456	14.3286	-191.122	1709.8	47.7767	-10.893	0	2.41895	2.84035	3.753	0.36111	0
2000	1000	34.5409	0.995827	0.996447	93.5806	-423713	14.2738	-190.701	1706.26	47.5745	-10.908	0	2.41838	2.84172	3.755	0.362927	0
2000	999	34.4008	0.995825	0.996448	93.1924	-421979	14.2192	-190.281	1702.72	47.3733	-10.923	0	2.4178	2.84401	3.757	0.364747	0
2000	998	34.2612	0.995805	0.996439	92.8057	-420255	14.1649	-189.863	1699.17	47.1728	-10.938	0	2.4172	2.84914	3.759	0.366577	0
2000	997	34.1215	0.995967	0.996545	92.4208	-418531	14.1107	-189.45	1695.78	46.9742	-10.953	0	2.41673	2.82265	3.76	0.368367	0
2000	996	33.9886	0.994973	0.995916	92.0401	-416885	14.0584	-189.013	1691.45	46.772	-10.968	0	2.41539	2.9755	3.765	0.370427	0
2000	995	33.8224	0.994997	0.995936	91.5906	-414979	13.9974	-188.57	1686.88	46.5373	-10.984	0	2.41405	2.97464	3.77	0.372485	0
2000	994	33.6579	0.99502	0.995956	91.1455	-413091	13.9371	-188.13	1682.35	46.3048	-10.999	0	2.41272	2.97379	3.775	0.374541	0
2000	993	33.495	0.995043	0.995976	90.7047	-411222	13.8772	-187.693	1677.86	46.0746	-11.014	0	2.4114	2.97295	3.78	0.376597	0
2000	992	33.3336	0.995066	0.995995	90.268	-409370	13.818	-187.26	1673.41	45.8468	-11.029	0	2.41009	2.97213	3.784	0.378651	0
2000	991	33.1738	0.995089	0.996015	89.8355	-407536	13.7593	-186.828	1669.01	45.6211	-11.045	0	2.40878	2.97132	3.789	0.380704	0
2000	990	33.0156	0.995111	0.996034	89.407	-405720	13.7011	-186.4	1664.64	45.3977	-11.06	0	2.40747	2.97052	3.794	0.382756	0
2000	989	32.8588	0.995133	0.996053	88.9826	-403920	13.6434	-185.975	1660.32	45.1764	-11.075	0	2.40618	2.96973	3.798	0.384807	0
2000	988	32.7035	0.995154	0.996071	88.5621	-402138	13.5863	-185.552	1656.03	44.9572	-11.091	0	2.40488	2.96896	3.803	0.386856	0
2000	987	32.5497	0.995176	0.99609	88.1455	-400372	13.5297	-185.133	1651.79	44.7402	-11.106	0	2.4036	2.9682	3.807	0.388904	0
2000	986	32.3974	0.995197	0.996108	87.7327	-398623	13.4735	-184.716	1647.58	44.5252	-11.121	0	2.40232	2.96745	3.812	0.39095	0
2000	985	32.2464	0.995218	0.996126	87.3236	-396889	13.4179	-184.301	1643.41	44.3122	-11.137	0	2.40104	2.96672	3.816	0.392996	0
2000	984	32.0968	0.995238	0.996144	86.9183	-395172	13.3628	-183.889	1639.28	44.1012	-11.152	0	2.39977	2.96599	3.821	0.39504	0
2000	983	31.9486	0.995259	0.996161	86.5167	-393470	13.3081	-183.48	1635.18	43.8922	-11.168	0	2.39851	2.96528	3.825	0.397082	0
2000	982	31.8018	0.995279	0.996179	86.1186	-391784	13.254	-183.073	1631.12	43.6852	-11.183	0	2.39725	2.96459	3.829	0.399123	0
2000	981	31.6563	0.995299	0.996196	85.7241	-390113	13.2003	-182.669	1627.09	43.48	-11.199	0	2.396	2.9639	3.834	0.401163	0
2000	980	31.5121	0.995318	0.996213	85.3331	-388457	13.147	-182.268	1623.1	43.2768	-11.214	0	2.39475	2.96323	3.838	0.403202	0
2000	979	31.3692	0.995338	0.99623	84.9455	-386816	13.0942	-181.869	1619.14	43.0753	-11.23	0	2.39351	2.96257	3.842	0.405239	0
2000	978	31.2276	0.995357	0.996246	84.5614	-385189	13.0419	-181.472	1615.21	42.8758	-11.246	0	2.39227	2.96192	3.846	0.407275	0
2000	977	31.0872	0.995376	0.996263	84.1806	-383577	12.99	-181.078	1611.32	42.678	-11.261	0	2.39103	2.96129	3.85	0.409309	0
2000	976	30.9481	0.995395	0.996279	83.803	-381979	12.9385	-180.686	1607.46	42.482	-11.277	0	2.3898	2.96067	3.854	0.411342	0
2000	975	30.8102	0.995413	0.996295	83.4288	-380395	12.8875	-180.296	1603.63	42.2877	-11.293	0	2.38858	2.96006	3.858	0.413373	0
2000	974	30.6734	0.995431	0.996311	83.0578	-378825	12.8369	-179.909	1599.83	42.0952	-11.308	0	2.38736	2.95946	3.862	0.415403	0
2000	973	30.5379	0.99545	0.996327	82.6899	-377268	12.7867	-179.524	1596.07	41.9044	-11.324	0	2.38615	2.95887	3.866	0.417432	0
2000	972	30.4036	0.995468	0.996343	82.3251	-375725	12.737	-179.142	1592.33	41.7152	-11.34	0	2.38494	2.9583	3.87	0.419459	0
2000	971	30.2704	0.995485	0.996358	81.9634	-374195	12.6876	-178.761	1588.63	41.5277	-11.355	0	2.38373	2.95774	3.874	0.421484	0
2000	970	30.1383	0.995503	0.996374	81.6048	-372678	12.6386	-178.383	1584.95	41.3419	-11.371	0	2.38253	2.95719	3.877	0.423508	0
2000	969	30.0074	0.99552	0.996389	81.2492	-371174	12.5901	-178.007	1581.3	41.1576	-11.387	0	2.38134	2.95666	3.881	0.425531	0
2000	968	29.8775	0.995537	0.996404	80.8965	-369683	12.5419	-177.633	1577.69	40.9749	-11.403	0	2.38015	2.95613	3.885	0.427552	0
2000	967	29.7488	0.995554	0.996419	80.5467	-368204	12.4941	-177.261	1574.09	40.7938	-11.419	0	2.37896	2.95562	3.888	0.429571	0
2000	966	29.6211	0.995571	0.996433	80.1998	-366738	12.4467	-176.892	1570.53	40.6143	-11.435	0	2.37778	2.95512	3.892	0.431589	0
2000	965	29.4945	0.995588	0.996448	79.8557	-365284	12.3997	-176.524	1567	40.4362	-11.451	0	2.3766	2.95464	3.896	0.433605	0
2000	964	29.369	0.995604	0.996462	79.5145	-363842	12.3531	-176.158	1563.49	40.2597	-11.467	0	2.37542	2.95417	3.899	0.43562	0
2000	963	29.2445	0.99562	0.996477	79.176	-362412	12.3068	-175.795	1560.01	40.0846	-11.483	0	2.37425	2.9537	3.903	0.437633	0
2000	962	29.121	0.995637	0.996491	78.8402	-360993	12.2608	-175.434	1556.55	39.911	-11.499	0	2.37308	2.95326	3.906	0.439645	0
2000	961	28.9985	0.995652	0.996505	78.5072	-359586	12.2153	-175.074	1553.12	39.7388	-11.515	0	2.37192	2.95282	3.91	0.441654	0
2000	960	28.877	0.995668	0.996519	78.1767	-358191	12.1701	-174.717	1549.72	39.5681	-11.531	0	2.37076	2.9524	3.913	0.443663	0
2000	959	28.7565	0.995684	0.996532	77.849	-356807	12.1252	-174.361	1546.34	39.3987	-11.547	0	2.3696	2.95199	3.916	0.445669	0
2000	958	28.6369	0.995699	0.996546	77.5238	-355434	12.0807	-174.007	1542.98	39.2308	-11.563	0	2.36845	2.95159	3.92	0.447674	0
2000	957	28.5183	0.995715	0.996559	77.2011	-354073	12.0365	-173.656	1539.65	39.0642	-11.579	0	2.36731	2.9512	3.923	0.449677	0
2000	956	28.4007	0.99573	0.996573	76.881	-352722	11.9927	-173.306	1536.35	38.8989	-11.595	0	2.36616	2.95083	3.926	0.451679	0
2000	955	28.284	0.995745	0.996586	76.5634	-351382	11.9492	-172.958	1533.06	38.735	-11.611	0	2.36502	2.95047	3.929	0.453679	0
2000	954	28.1682	0.995759	0.996599	76.2482	-350052	11.906	-172.612	1529.8	38.5724	-11.628	0	2.36388	2.95013	3.933	0.455677	0
2000	953	28.0533	0.995774	0.996612	75.9355	-348733	11.8632	-172.267	1526.57	38.4111	-11.644	0	2.36275	2.94979	3.936	0.457673	0
2000	952	27.9393	0.995789	0.996625	75.6252	-347425	11.8206	-171.925	1523.35	38.2511	-11.66	0	2.36162	2.94947	3.939	0.459668	0
2000	951	27.8262	0.995803	0.996638	75.3172	-346127	11.7784	-171.584	1520.16	38.0924	-11.676	0	2.36049	2.94916	3.942	0.46166	0
2000	950	27.714	0.995817	0.996651	75.0116	-344839	11.7365	-171.245	1516.99	37.9349	-11.693	0	2.35937	2.94887	3.945	0.463651	0
2000	949	27.6026	0.995831	0.996663	74.7083	-343561	11.6949	-170.908	1513.84	37.7786	-11.709	0	2.35825	2.94859	3.948	0.465641	0
2000	948	27.4921	0.995845	0.996676	74.4073	-342292	11.6537	-170.572	1510.72	37.6236	-11.725	0	2.35713	2.94832	3.951	0.467628	0
2000	947	27.3824	0.995859	0.996688	74.1086	-341034	11.6127	-170.238	1507.61	37.4697	-11.742	0	2.35602	2.94806	3.954	0.469613	0
2000	946	27.2736	0.995873	0.9967	73.8121	-339785	11.572	-169.906	1504.53	37.3171	-11.758	0	2.35491	2.94782	3.957	0.471597	0
2000	945	27.1656	0.995887	0.996712	73.5178	-338546	11.5316	-169.576	1501.46	37.1656	-11.775	0	2.3538	2.94759	3.96	0.473579	0
2000	944	27.0584	0.9959	0.996725	73.2256	-337317	11.4915	-169.247	1498.42	37.0153	-11.791	0	2.35269	2.94738	3.962	0.475559	0
2000	943	26.952	0.995913	0.996736	72.9357	-336097	11.4517	-168.92	1495.4	36.8661	-11.808	0	2.35159	2.94718	3.965	0.477537	0
2000	942	26.8464	0.995927	0.996748	72.6478	-334886	11.4122	-168.595	1492.39	36.7181	-11.824	0	2.35049	2.94699	3.968	0.479513	0
2000	941	26.7416	0.99594	0.99676	72.3621	-333684	11.373	-168.271	1489.41	36.5712	-11.841	0	2.34939	2.94681	3.971	0.481487	0
2000	940	26.6375	0.995953	0.996772	72.0784	-332491	11.334	-167.948	1486.44	36.4253	-11.857	0	2.3483	2.94665	3.974	0.48346	0
2000	939	26.5343	0.995965	0.996783	71.7968	-331307	11.2953	-167.628	1483.5	36.2806	-11.874	0	2.34721	2.9465	3.976	0.48543	0
2000	938	26.4317	0.995978	0.996795	71.5173	-330132	11.2569	-167.309	1480.57	36.137	-11.891	0	2.34612	2.94637	3.979	0.487399	0
2000	937	26.33	0.995991	0.996806	71.2397	-328966	11.2188	-166.991	1477.66	35.9944	-11.907	0	2.34503	2.94625	3.982	0.489365	0
2000	936	26.2289	0.996003	0.996818	70.9642	-327808	11.1809	-166.675	1474.77	35.8529	-11.924	0	2.34395	2.94614	3.984	0.491329	0
2000	935	26.1286	0.996016	0.996829	70.6906	-326660	11.1433	-166.361	1471.9	35.7124	-11.941	0	2.34287	2.94605	3.987	0.493292	0
2000	934	26.0291	0.996028	0.99684	70.4189	-325519	11.106	-166.048	1469.04	35.573	-11.958	0	2.34179	2.94597	3.989	0.495252	0
2000	933	25.9302	0.99604	0.996851	70.1492	-324387	11.0689	-165.736	1466.21	35.4345	-11.974	0	2.34071	2.9459	3.992	0.497211	0
2000	932	25.8306	0.992278	0.994205	69.8508	-323275	11.0297	-165.293	1461.78	35.2677	-11.991	0	2.33738	3.12035	4.001	0.501153	0
2000	931	25.633	0.99605	0.996799	69.374	-321148	10.963	-164.939	1458	35.0228	-12.008	0	2.33637	2.88513	4.003	0.503297	0
2000	930	25.535	0.995804	0.996682	69.1038	-320003	10.9257	-164.617	1455.04	34.8831	-12.025	0	2.33509	2.95569	4.007	0.505491	0
2000	929	25.431	0.995819	0.996696	68.8228	-318835	10.8872	-164.297	1452.05	34.7385	-12.042	0	2.33381	2.9553	4.01	0.507681	0
2000	928	25.3279	0.995835	0.996709	68.544	-317677	10.849	-163.978	1449.08	34.5951	-12.059	0	2.33253	2.9549	4.013	0.509869	0
2000	927	25.2257	0.99585	0.996723	68.2673	-316527	10.8111	-163.66	1446.13	34.4528	-12.076	0	2.33126	2.9545	4.016	0.512054	0
2000	926	25.1242	0.995866	0.996736	67.9929	-315387	10.7735	-163.345	1443.2	34.3117	-12.093	0	2.32999	2.95409	4.019	0.514237	0
2000	925	25.0235	0.995881	0.99675	67.7206	-314256	10.7362	-163.031	1440.29	34.1718	-12.11	0	2.32873	2.95369	4.022	0.516416	0
2000	924	24.9237	0.995897	0.996763	67.4503	-313133	10.6991	-162.718	1437.41	34.0329	-12.127	0	2.32748	2.95328	4.025	0.518592	0
2000	923	24.8246	0.995912	0.996777	67.1822	-312019	10.6624	-162.407	1434.54	33.8952	-12.144	0	2.32623	2.95287	4.028	0.520765	0
2000	922	24.7263	0.995927	0.99679	66.9162	-310914	10.6258	-162.097	1431.69	33.7586	-12.161	0	2.32498	2.95245	4.031	0.522935	0
2000	921	24.6288	0.995942	0.996803	66.6522	-309818	10.5896	-161.789	1428.86	33.623	-12.178	0	2.32374	2.95203	4.034	0.525102	0
2000	920	24.532	0.995957	0.996816	66.3902	-308730	10.5537	-161.483	1426.06	33.4886	-12.195	0	2.32251	2.95161	4.037	0.527265	0
2000	919	24.4361	0.995973	0.996829	66.1303	-307650	10.518	-161.178	1423.27	33.3552	-12.212	0	2.32127	2.95119	4.039	0.529425	0
2000	918	24.3408	0.995988	0.996843	65.8723	-306579	10.4825	-160.874	1420.5	33.2229	-12.23	0	2.32005	2.95077	4.042	0.531582	0
2000	917	24.2463	0.996003	0.996856	65.6163	-305516	10.4474	-160.572	1417.75	33.0916	-12.247	0	2.31883	2.95034	4.045	0.533735	0
2000	916	24.1526	0.996018	0.996868	65.3623	-304461	10.4124	-160.272	1415.02	32.9613	-12.264	0	2.31761	2.94991	4.047	0.535884	0
2000	915	24.0596	0.996032	0.996881	65.1102	-303415	10.3778	-159.973	1412.3	32.8321	-12.281	0	2.3164	2.94948	4.05	0.53803	0
2000	914	23.9673	0.996047	0.996894	64.8601	-302376	10.3434	-159.675	1409.61	32.7039	-12.299	0	2.31519	2.94904	4.053	0.540173	0
2000	913	23.8757	0.996062	0.996907	64.6118	-301345	10.3092	-159.379	1406.93	32.5768	-12.316	0	2.31399	2.94861	4.055	0.542311	0
2000	912	23.7849	0.996077	0.99692	64.3654	-300322	10.2753	-159.084	1404.27	32.4506	-12.333	0	2.3128	2.94817	4.058	0.544446	0
2000	911	23.6947	0.996092	0.996932	64.1209	-299307	10.2417	-158.79	1401.63	32.3254	-12.351	0	2.31161	2.94773	4.06	0.546577	0
2000	910	23.6053	0.996106	0.996945	63.8782	-298300	10.2083	-158.498	1399.01	32.2012	-12.368	0	2.31042	2.94729	4.062	0.548704	0
2000	909	23.5165	0.996121	0.996958	63.6374	-297300	10.1751	-158.207	1396.4	32.0779	-12.386	0	2.30924	2.94684	4.065	0.550827	0
2000	908	23.4285	0.996136	0.99697	63.3983	-296308	10.1422	-157.918	1393.81	31.9557	-12.403	0	2.30807	2.94639	4.067	0.552946	0
2000	907	23.3411	0.99615	0.996983	63.1611	-295324	10.1095	-157.63	1391.24	31.8343	-12.421	0	2.30689	2.94595	4.069	0.555061	0
2000	906	23.2544	0.996165	0.996995	62.9257	-294346	10.0771	-157.343	1388.68	31.714	-12.438	0	2.30573	2.94549	4.072	0.557172	0
2000	905	23.1683	0.996179	0.997008	62.692	-293377	10.0449	-157.058	1386.14	31.5945	-12.456	0	2.30457	2.94504	4.074	0.559279	0
2000	904	23.0829	0.996194	0.99702	62.46	-292414	10.0129	-156.774	1383.62	31.476	-12.474	0	2.30342	2.94459	4.076	0.561381	0
2000	903	22.9982	0.996208	0.997032	62.2298	-291459	9.98112	-156.491	1381.12	31.3584	-12.491	0	2.30227	2.94413	4.078	0.563479	0
2000	902	22.9141	0.996222	0.997044	62.0013	-290511	9.9496	-156.21	1378.63	31.2417	-12.509	0	2.30112	2.94367	4.08	0.565573	0
2000	901	22.8307	0.996237	0.997057	61.7745	-289570	9.91831	-155.93	1376.15	31.1259	-12.527	0	2.29998	2.94321	4.082	0.567662	0
2000	900	22.7479	0.996251	0.997069	61.5494	-288636	9.88724	-155.651	1373.7	31.011	-12.544	0	2.29885	2.94275	4.084	0.569747	0
Title:	R-magma	-	mresidual	from	MZ-magma	at	T	=	1145	C
Liquid	Composition:
Pressure	Temperature	mass	SiO2	TiO2	Al2O3	Fe2O3	Cr2O3	FeO	MnO	MgO	CaO	Na2O	K2O	H2O
2000	1400	99.9944	55.7259	0.154513	16.937	1.10632	0.0037064	6.19674	0.169778	5.74576	8.55448	4.38187	0.114054	0.909925
2000	1400	99.9944	55.7259	0.154513	16.937	1.10632	0.0037064	6.19674	0.169778	5.74576	8.55448	4.38187	0.114054	0.909925
2000	1399	99.9944	55.7259	0.154513	16.937	1.10645	0.0037064	6.19663	0.169778	5.74576	8.55448	4.38187	0.114054	0.909925
2000	1398	99.9944	55.7259	0.154513	16.937	1.10657	0.0037064	6.19651	0.169778	5.74576	8.55448	4.38187	0.114054	0.909924
2000	1397	99.9944	55.7259	0.154513	16.937	1.10671	0.0037064	6.19639	0.169778	5.74576	8.55448	4.38187	0.114054	0.909924
2000	1396	99.9945	55.7258	0.154513	16.937	1.10684	0.0037064	6.19627	0.169778	5.74576	8.55448	4.38187	0.114054	0.909924
2000	1395	99.9945	55.7258	0.154513	16.937	1.10697	0.0037064	6.19615	0.169778	5.74575	8.55447	4.38187	0.114054	0.909924
2000	1394	99.9945	55.7258	0.154513	16.937	1.1071	0.00370639	6.19603	0.169778	5.74575	8.55447	4.38187	0.114054	0.909924
2000	1393	99.9945	55.7258	0.154513	16.937	1.10724	0.00370639	6.1959	0.169778	5.74575	8.55447	4.38187	0.114054	0.909924
2000	1392	99.9945	55.7258	0.154513	16.937	1.10738	0.00370639	6.19578	0.169778	5.74575	8.55447	4.38187	0.114054	0.909924
2000	1391	99.9945	55.7258	0.154513	16.937	1.10752	0.00370639	6.19565	0.169778	5.74575	8.55447	4.38187	0.114054	0.909924
2000	1390	99.9945	55.7258	0.154513	16.937	1.10766	0.00370639	6.19553	0.169778	5.74575	8.55447	4.38186	0.114054	0.909923
2000	1389	99.9945	55.7258	0.154513	16.937	1.1078	0.00370639	6.1954	0.169778	5.74575	8.55447	4.38186	0.114054	0.909923
2000	1388	99.9946	55.7258	0.154513	16.9369	1.10794	0.00370639	6.19527	0.169778	5.74575	8.55447	4.38186	0.114054	0.909923
2000	1387	99.9946	55.7258	0.154513	16.9369	1.10808	0.00370639	6.19514	0.169778	5.74575	8.55446	4.38186	0.114054	0.909923
2000	1386	99.9946	55.7258	0.154513	16.9369	1.10823	0.00370639	6.19501	0.169778	5.74575	8.55446	4.38186	0.114054	0.909923
2000	1385	99.9946	55.7258	0.154513	16.9369	1.10838	0.00370639	6.19488	0.169778	5.74575	8.55446	4.38186	0.114054	0.909923
2000	1384	99.9946	55.7258	0.154513	16.9369	1.10852	0.00370639	6.19474	0.169778	5.74575	8.55446	4.38186	0.114054	0.909923
2000	1383	99.9946	55.7257	0.154513	16.9369	1.10867	0.00370639	6.19461	0.169778	5.74574	8.55446	4.38186	0.114054	0.909923
2000	1382	99.9946	55.7257	0.154513	16.9369	1.10882	0.00370639	6.19447	0.169778	5.74574	8.55446	4.38186	0.114054	0.909922
2000	1381	99.9947	55.7257	0.154513	16.9369	1.10898	0.00370639	6.19433	0.169778	5.74574	8.55446	4.38186	0.114054	0.909922
2000	1380	99.9947	55.7257	0.154513	16.9369	1.10913	0.00370639	6.19419	0.169778	5.74574	8.55446	4.38186	0.114054	0.909922
2000	1379	99.9947	55.7257	0.154513	16.9369	1.10928	0.00370639	6.19405	0.169778	5.74574	8.55445	4.38186	0.114054	0.909922
2000	1378	99.9947	55.7257	0.154513	16.9369	1.10944	0.00370639	6.19391	0.169778	5.74574	8.55445	4.38186	0.114054	0.909922
2000	1377	99.9947	55.7257	0.154513	16.9369	1.1096	0.00370639	6.19377	0.169778	5.74574	8.55445	4.38186	0.114054	0.909922
2000	1376	99.9947	55.7257	0.154513	16.9369	1.10976	0.00370639	6.19362	0.169778	5.74574	8.55445	4.38186	0.114054	0.909922
2000	1375	99.9948	55.7257	0.154513	16.9369	1.10992	0.00370638	6.19348	0.169778	5.74574	8.55445	4.38186	0.114053	0.909921
2000	1374	99.9948	55.7257	0.154513	16.9369	1.11008	0.00370638	6.19333	0.169778	5.74574	8.55445	4.38185	0.114053	0.909921
2000	1373	99.9948	55.7257	0.154513	16.9369	1.11024	0.00370638	6.19318	0.169778	5.74574	8.55445	4.38185	0.114053	0.909921
2000	1372	99.9948	55.7257	0.154513	16.9369	1.11041	0.00370638	6.19303	0.169778	5.74573	8.55444	4.38185	0.114053	0.909921
2000	1371	99.9948	55.7256	0.154513	16.9369	1.11057	0.00370638	6.19288	0.169778	5.74573	8.55444	4.38185	0.114053	0.909921
2000	1370	99.9948	55.7256	0.154513	16.9369	1.11074	0.00370638	6.19273	0.169778	5.74573	8.55444	4.38185	0.114053	0.909921
2000	1369	99.9949	55.7256	0.154513	16.9369	1.11091	0.00370638	6.19258	0.169778	5.74573	8.55444	4.38185	0.114053	0.90992
2000	1368	99.9949	55.7256	0.154513	16.9369	1.11108	0.00370638	6.19242	0.169778	5.74573	8.55444	4.38185	0.114053	0.90992
2000	1367	99.9949	55.7256	0.154513	16.9369	1.11125	0.00370638	6.19227	0.169778	5.74573	8.55444	4.38185	0.114053	0.90992
2000	1366	99.9949	55.7256	0.154513	16.9369	1.11142	0.00370638	6.19211	0.169778	5.74573	8.55444	4.38185	0.114053	0.90992
2000	1365	99.9949	55.7256	0.154513	16.9369	1.1116	0.00370638	6.19195	0.169778	5.74573	8.55443	4.38185	0.114053	0.90992
2000	1364	99.9949	55.7256	0.154513	16.9369	1.11177	0.00370638	6.19179	0.169777	5.74573	8.55443	4.38185	0.114053	0.90992
2000	1363	99.995	55.7256	0.154513	16.9369	1.11195	0.00370638	6.19163	0.169777	5.74573	8.55443	4.38185	0.114053	0.90992
2000	1362	99.995	55.7256	0.154513	16.9369	1.11213	0.00370638	6.19147	0.169777	5.74572	8.55443	4.38185	0.114053	0.909919
2000	1361	99.995	55.7255	0.154513	16.9369	1.11231	0.00370638	6.19131	0.169777	5.74572	8.55443	4.38184	0.114053	0.909919
2000	1360	99.995	55.7255	0.154513	16.9369	1.11249	0.00370637	6.19114	0.169777	5.74572	8.55443	4.38184	0.114053	0.909919
2000	1359	99.995	55.7255	0.154512	16.9369	1.11267	0.00370637	6.19098	0.169777	5.74572	8.55443	4.38184	0.114053	0.909919
2000	1358	99.9951	55.7255	0.154512	16.9369	1.11286	0.00370637	6.19081	0.169777	5.74572	8.55442	4.38184	0.114053	0.909919
2000	1357	99.9951	55.7255	0.154512	16.9369	1.11305	0.00370637	6.19064	0.169777	5.74572	8.55442	4.38184	0.114053	0.909919
2000	1356	99.9951	55.7255	0.154512	16.9369	1.11323	0.00370637	6.19047	0.169777	5.74572	8.55442	4.38184	0.114053	0.909918
2000	1355	99.9951	55.7255	0.154512	16.9369	1.11342	0.00370637	6.1903	0.169777	5.74572	8.55442	4.38184	0.114053	0.909918
2000	1354	99.9951	55.7255	0.154512	16.9369	1.11361	0.00370637	6.19013	0.169777	5.74572	8.55442	4.38184	0.114053	0.909918
2000	1353	99.9951	55.7255	0.154512	16.9368	1.1138	0.00370637	6.18995	0.169777	5.74572	8.55442	4.38184	0.114053	0.909918
2000	1352	99.9952	55.7254	0.154512	16.9368	1.114	0.00370637	6.18978	0.169777	5.74571	8.55441	4.38184	0.114053	0.909918
2000	1351	99.9952	55.7254	0.154512	16.9368	1.11419	0.00370637	6.1896	0.169777	5.74571	8.55441	4.38184	0.114053	0.909917
2000	1350	99.9952	55.7254	0.154512	16.9368	1.11439	0.00370637	6.18942	0.169777	5.74571	8.55441	4.38184	0.114053	0.909917
2000	1349	99.9952	55.7254	0.154512	16.9368	1.11459	0.00370637	6.18924	0.169777	5.74571	8.55441	4.38183	0.114053	0.909917
2000	1348	99.9952	55.7254	0.154512	16.9368	1.11479	0.00370637	6.18906	0.169777	5.74571	8.55441	4.38183	0.114053	0.909917
2000	1347	99.9953	55.7254	0.154512	16.9368	1.11499	0.00370637	6.18888	0.169777	5.74571	8.55441	4.38183	0.114053	0.909917
2000	1346	99.9953	55.7254	0.154512	16.9368	1.11519	0.00370636	6.18869	0.169777	5.74571	8.5544	4.38183	0.114053	0.909917
2000	1345	99.9953	55.7254	0.154512	16.9368	1.11539	0.00370636	6.18851	0.169777	5.74571	8.5544	4.38183	0.114053	0.909916
2000	1344	99.9953	55.7254	0.154512	16.9368	1.1156	0.00370636	6.18832	0.169777	5.7457	8.5544	4.38183	0.114053	0.909916
2000	1343	99.9954	55.7253	0.154512	16.9368	1.11581	0.00370636	6.18814	0.169777	5.7457	8.5544	4.38183	0.114053	0.909916
2000	1342	99.9954	55.7253	0.154512	16.9368	1.11601	0.00370636	6.18795	0.169777	5.7457	8.5544	4.38183	0.114053	0.909916
2000	1341	99.9954	55.7253	0.154512	16.9368	1.11622	0.00370636	6.18776	0.169777	5.7457	8.55439	4.38183	0.114053	0.909916
2000	1340	99.9954	55.7253	0.154512	16.9368	1.11644	0.00370636	6.18756	0.169777	5.7457	8.55439	4.38183	0.114053	0.909915
2000	1339	99.9954	55.7253	0.154512	16.9368	1.11665	0.00370636	6.18737	0.169777	5.7457	8.55439	4.38183	0.114053	0.909915
2000	1338	99.9955	55.7253	0.154512	16.9368	1.11686	0.00370636	6.18718	0.169777	5.7457	8.55439	4.38182	0.114053	0.909915
2000	1337	99.9955	55.7253	0.154512	16.9368	1.11708	0.00370636	6.18698	0.169777	5.7457	8.55439	4.38182	0.114053	0.909915
2000	1336	99.9955	55.7253	0.154512	16.9368	1.1173	0.00370636	6.18678	0.169777	5.7457	8.55439	4.38182	0.114053	0.909915
2000	1335	99.9955	55.7253	0.154512	16.9368	1.11752	0.00370636	6.18658	0.169776	5.74569	8.55438	4.38182	0.114053	0.909914
2000	1334	99.9955	55.7252	0.154512	16.9368	1.11774	0.00370636	6.18638	0.169776	5.74569	8.55438	4.38182	0.114053	0.909914
2000	1333	99.9956	55.7252	0.154512	16.9368	1.11796	0.00370635	6.18618	0.169776	5.74569	8.55438	4.38182	0.114053	0.909914
2000	1332	99.9956	55.7252	0.154512	16.9368	1.11818	0.00370635	6.18598	0.169776	5.74569	8.55438	4.38182	0.114053	0.909914
2000	1331	99.9956	55.7252	0.154512	16.9368	1.11841	0.00370635	6.18577	0.169776	5.74569	8.55438	4.38182	0.114053	0.909914
2000	1330	99.9956	55.7252	0.154512	16.9368	1.11864	0.00370635	6.18557	0.169776	5.74569	8.55437	4.38182	0.114052	0.909913
2000	1329	99.9957	55.7252	0.154512	16.9368	1.11887	0.00370635	6.18536	0.169776	5.74569	8.55437	4.38182	0.114052	0.909913
2000	1328	99.9957	55.7252	0.154511	16.9368	1.1191	0.00370635	6.18515	0.169776	5.74568	8.55437	4.38181	0.114052	0.909913
2000	1327	99.9957	55.7252	0.154511	16.9368	1.11933	0.00370635	6.18494	0.169776	5.74568	8.55437	4.38181	0.114052	0.909913
2000	1326	99.9957	55.7251	0.154511	16.9368	1.11956	0.00370635	6.18473	0.169776	5.74568	8.55437	4.38181	0.114052	0.909913
2000	1325	99.9958	55.7251	0.154511	16.9367	1.1198	0.00370635	6.18452	0.169776	5.74568	8.55436	4.38181	0.114052	0.909912
2000	1324	99.9958	55.7251	0.154511	16.9367	1.12003	0.00370635	6.1843	0.169776	5.74568	8.55436	4.38181	0.114052	0.909912
2000	1323	99.9958	55.7251	0.154511	16.9367	1.12027	0.00370635	6.18408	0.169776	5.74568	8.55436	4.38181	0.114052	0.909912
2000	1322	99.9958	55.7251	0.154511	16.9367	1.12051	0.00370635	6.18387	0.169776	5.74568	8.55436	4.38181	0.114052	0.909912
2000	1321	99.9958	55.7251	0.154511	16.9367	1.12075	0.00370634	6.18365	0.169776	5.74568	8.55436	4.38181	0.114052	0.909911
2000	1320	99.9959	55.7251	0.154511	16.9367	1.121	0.00370634	6.18343	0.169776	5.74567	8.55435	4.38181	0.114052	0.909911
2000	1319	99.9959	55.725	0.154511	16.9367	1.12124	0.00370634	6.18321	0.169776	5.74567	8.55435	4.38181	0.114052	0.909911
2000	1318	99.9959	55.725	0.154511	16.9367	1.12149	0.00370634	6.18298	0.169776	5.74567	8.55435	4.3818	0.114052	0.909911
2000	1317	99.9959	55.725	0.154511	16.9367	1.12174	0.00370634	6.18276	0.169776	5.74567	8.55435	4.3818	0.114052	0.909911
2000	1316	99.996	55.725	0.154511	16.9367	1.12199	0.00370634	6.18253	0.169776	5.74567	8.55435	4.3818	0.114052	0.90991
2000	1315	99.996	55.725	0.154511	16.9367	1.12224	0.00370634	6.1823	0.169776	5.74567	8.55434	4.3818	0.114052	0.90991
2000	1314	99.996	55.725	0.154511	16.9367	1.12249	0.00370634	6.18207	0.169776	5.74567	8.55434	4.3818	0.114052	0.90991
2000	1313	99.996	55.725	0.154511	16.9367	1.12274	0.00370634	6.18184	0.169776	5.74566	8.55434	4.3818	0.114052	0.90991
2000	1312	99.9961	55.7249	0.154511	16.9367	1.123	0.00370634	6.18161	0.169776	5.74566	8.55434	4.3818	0.114052	0.909909
2000	1311	99.9961	55.7249	0.154511	16.9367	1.12326	0.00370633	6.18138	0.169776	5.74566	8.55433	4.3818	0.114052	0.909909
2000	1310	99.9961	55.7249	0.154511	16.9367	1.12352	0.00370633	6.18114	0.169775	5.74566	8.55433	4.3818	0.114052	0.909909
2000	1309	99.9962	55.7249	0.154511	16.9367	1.12378	0.00370633	6.1809	0.169775	5.74566	8.55433	4.38179	0.114052	0.909909
2000	1308	99.9962	55.7249	0.154511	16.9367	1.12404	0.00370633	6.18066	0.169775	5.74566	8.55433	4.38179	0.114052	0.909908
2000	1307	99.9962	55.7249	0.154511	16.9367	1.12431	0.00370633	6.18042	0.169775	5.74565	8.55433	4.38179	0.114052	0.909908
2000	1306	99.9962	55.7249	0.154511	16.9367	1.12457	0.00370633	6.18018	0.169775	5.74565	8.55432	4.38179	0.114052	0.909908
2000	1305	99.9963	55.7248	0.154511	16.9367	1.12484	0.00370633	6.17994	0.169775	5.74565	8.55432	4.38179	0.114052	0.909908
2000	1304	99.9963	55.7248	0.154511	16.9367	1.12511	0.00370633	6.1797	0.169775	5.74565	8.55432	4.38179	0.114052	0.909908
2000	1303	99.9963	55.7248	0.154511	16.9367	1.12538	0.00370633	6.17945	0.169775	5.74565	8.55432	4.38179	0.114052	0.909907
2000	1302	99.9963	55.7248	0.15451	16.9366	1.12566	0.00370633	6.1792	0.169775	5.74565	8.55431	4.38179	0.114052	0.909907
2000	1301	99.9964	55.7248	0.15451	16.9366	1.12593	0.00370632	6.17895	0.169775	5.74565	8.55431	4.38178	0.114052	0.909907
2000	1300	99.9964	55.7248	0.15451	16.9366	1.12621	0.00370632	6.1787	0.169775	5.74564	8.55431	4.38178	0.114052	0.909907
2000	1299	99.9964	55.7248	0.15451	16.9366	1.12649	0.00370632	6.17845	0.169775	5.74564	8.55431	4.38178	0.114052	0.909906
2000	1298	99.9964	55.7247	0.15451	16.9366	1.12677	0.00370632	6.17819	0.169775	5.74564	8.5543	4.38178	0.114052	0.909906
2000	1297	99.9965	55.7247	0.15451	16.9366	1.12705	0.00370632	6.17794	0.169775	5.74564	8.5543	4.38178	0.114052	0.909906
2000	1296	99.9965	55.7247	0.15451	16.9366	1.12733	0.00370632	6.17768	0.169775	5.74564	8.5543	4.38178	0.114052	0.909905
2000	1295	99.9965	55.7247	0.15451	16.9366	1.12762	0.00370632	6.17742	0.169775	5.74564	8.5543	4.38178	0.114051	0.909905
2000	1294	99.9966	55.7247	0.15451	16.9366	1.1279	0.00370632	6.17716	0.169775	5.74563	8.55429	4.38178	0.114051	0.909905
2000	1293	99.9966	55.7247	0.15451	16.9366	1.12819	0.00370632	6.1769	0.169775	5.74563	8.55429	4.38177	0.114051	0.909905
2000	1292	99.9966	55.7246	0.15451	16.9366	1.12848	0.00370632	6.17664	0.169775	5.74563	8.55429	4.38177	0.114051	0.909904
2000	1291	99.9967	55.7246	0.15451	16.9366	1.12877	0.00370631	6.17637	0.169775	5.74563	8.55429	4.38177	0.114051	0.909904
2000	1290	99.9967	55.7246	0.15451	16.9366	1.12907	0.00370631	6.17611	0.169775	5.74563	8.55428	4.38177	0.114051	0.909904
2000	1289	99.9967	55.7246	0.15451	16.9366	1.12936	0.00370631	6.17584	0.169774	5.74563	8.55428	4.38177	0.114051	0.909904
2000	1288	99.9967	55.7246	0.15451	16.9366	1.12966	0.00370631	6.17557	0.169774	5.74562	8.55428	4.38177	0.114051	0.909903
2000	1287	99.9968	55.7246	0.15451	16.9366	1.12996	0.00370631	6.1753	0.169774	5.74562	8.55428	4.38177	0.114051	0.909903
2000	1286	99.9968	55.7245	0.15451	16.9366	1.13026	0.00370631	6.17502	0.169774	5.74562	8.55427	4.38177	0.114051	0.909903
2000	1285	99.9968	55.7245	0.15451	16.9366	1.13057	0.00370631	6.17475	0.169774	5.74562	8.55427	4.38176	0.114051	0.909903
2000	1284	99.9969	55.7245	0.15451	16.9366	1.13087	0.00370631	6.17447	0.169774	5.74562	8.55427	4.38176	0.114051	0.909902
2000	1283	99.9969	55.7245	0.15451	16.9366	1.13118	0.00370631	6.17419	0.169774	5.74562	8.55427	4.38176	0.114051	0.909902
2000	1282	99.9969	55.7245	0.15451	16.9365	1.13149	0.0037063	6.17391	0.169774	5.74561	8.55426	4.38176	0.114051	0.909902
2000	1281	99.997	55.7245	0.15451	16.9365	1.1318	0.0037063	6.17363	0.169774	5.74561	8.55426	4.38176	0.114051	0.909901
2000	1280	99.997	55.7244	0.154509	16.9365	1.13211	0.0037063	6.17335	0.169774	5.74561	8.55426	4.38176	0.114051	0.909901
2000	1279	99.997	55.7244	0.154509	16.9365	1.13242	0.0037063	6.17306	0.169774	5.74561	8.55426	4.38176	0.114051	0.909901
2000	1278	99.997	55.7244	0.154509	16.9365	1.13274	0.0037063	6.17278	0.169774	5.74561	8.55425	4.38175	0.114051	0.909901
2000	1277	99.9971	55.7244	0.154509	16.9365	1.13305	0.0037063	6.17249	0.169774	5.7456	8.55425	4.38175	0.114051	0.9099
2000	1276	99.9971	55.7244	0.154509	16.9365	1.13337	0.0037063	6.1722	0.169774	5.7456	8.55425	4.38175	0.114051	0.9099
2000	1275	99.9971	55.7243	0.154509	16.9365	1.1337	0.0037063	6.17191	0.169774	5.7456	8.55424	4.38175	0.114051	0.9099
2000	1274	99.9972	55.7243	0.154509	16.9365	1.13402	0.00370629	6.17162	0.169774	5.7456	8.55424	4.38175	0.114051	0.909899
2000	1273	99.9972	55.7243	0.154509	16.9365	1.13434	0.00370629	6.17132	0.169774	5.7456	8.55424	4.38175	0.114051	0.909899
2000	1272	99.9972	55.7243	0.154509	16.9365	1.13467	0.00370629	6.17102	0.169774	5.74559	8.55424	4.38175	0.114051	0.909899
2000	1271	99.9973	55.7243	0.154509	16.9365	1.135	0.00370629	6.17073	0.169774	5.74559	8.55423	4.38174	0.114051	0.909898
2000	1270	99.9973	55.7243	0.154509	16.9365	1.13533	0.00370629	6.17043	0.169773	5.74559	8.55423	4.38174	0.114051	0.909898
2000	1269	99.9973	55.7242	0.154509	16.9365	1.13566	0.00370629	6.17013	0.169773	5.74559	8.55423	4.38174	0.114051	0.909898
2000	1268	99.9974	55.7242	0.154509	16.9365	1.136	0.00370629	6.16982	0.169773	5.74559	8.55422	4.38174	0.114051	0.909898
2000	1267	99.9974	55.7242	0.154509	16.9365	1.13633	0.00370629	6.16952	0.169773	5.74559	8.55422	4.38174	0.11405	0.909897
2000	1266	99.9974	55.7242	0.154509	16.9365	1.13667	0.00370629	6.16921	0.169773	5.74558	8.55422	4.38174	0.11405	0.909897
2000	1265	99.9975	55.7242	0.154509	16.9365	1.13701	0.00370628	6.1689	0.169773	5.74558	8.55422	4.38174	0.11405	0.909897
2000	1264	99.9975	55.7241	0.154509	16.9364	1.13735	0.00370628	6.16859	0.169773	5.74558	8.55421	4.38173	0.11405	0.909896
2000	1263	99.9975	55.7241	0.154509	16.9364	1.1377	0.00370628	6.16828	0.169773	5.74558	8.55421	4.38173	0.11405	0.909896
2000	1262	99.9976	55.7241	0.154509	16.9364	1.13804	0.00370628	6.16797	0.169773	5.74558	8.55421	4.38173	0.11405	0.909896
2000	1261	99.9976	55.7241	0.154508	16.9364	1.13839	0.00370628	6.16765	0.169773	5.74557	8.5542	4.38173	0.11405	0.909895
2000	1260	99.9977	55.7241	0.154508	16.9364	1.13874	0.00370628	6.16733	0.169773	5.74557	8.5542	4.38173	0.11405	0.909895
2000	1259	99.9977	55.724	0.154508	16.9364	1.13909	0.00370628	6.16701	0.169773	5.74557	8.5542	4.38173	0.11405	0.909895
2000	1258	99.9977	55.724	0.154508	16.9364	1.13945	0.00370627	6.16669	0.169773	5.74557	8.5542	4.38173	0.11405	0.909894
2000	1257	99.9978	55.724	0.154508	16.9364	1.1398	0.00370627	6.16637	0.169773	5.74557	8.55419	4.38172	0.11405	0.909894
2000	1256	99.9978	55.724	0.154508	16.9364	1.14016	0.00370627	6.16605	0.169773	5.74556	8.55419	4.38172	0.11405	0.909894
2000	1255	99.9978	55.724	0.154508	16.9364	1.14052	0.00370627	6.16572	0.169773	5.74556	8.55419	4.38172	0.11405	0.909893
2000	1254	99.9979	55.7239	0.154508	16.9364	1.14088	0.00370627	6.16539	0.169773	5.74556	8.55418	4.38172	0.11405	0.909893
2000	1253	99.9979	55.7239	0.154508	16.9364	1.14124	0.00370627	6.16506	0.169772	5.74556	8.55418	4.38172	0.11405	0.909893
2000	1252	99.9979	55.7239	0.154508	16.9364	1.14161	0.00370627	6.16473	0.169772	5.74555	8.55418	4.38172	0.11405	0.909892
2000	1251	99.998	55.7239	0.154508	16.9364	1.14198	0.00370627	6.1644	0.169772	5.74555	8.55417	4.38171	0.11405	0.909892
2000	1250	99.998	55.7239	0.154508	16.9364	1.14234	0.00370626	6.16406	0.169772	5.74555	8.55417	4.38171	0.11405	0.909892
2000	1249	99.9981	55.7238	0.154508	16.9364	1.14272	0.00370626	6.16373	0.169772	5.74555	8.55417	4.38171	0.11405	0.909891
2000	1248	99.9981	55.7238	0.154508	16.9364	1.14309	0.00370626	6.16339	0.169772	5.74555	8.55416	4.38171	0.11405	0.909891
2000	1247	99.9981	55.7238	0.154508	16.9363	1.14347	0.00370626	6.16305	0.169772	5.74554	8.55416	4.38171	0.11405	0.909891
2000	1246	99.9982	55.7238	0.154508	16.9363	1.14384	0.00370626	6.16271	0.169772	5.74554	8.55416	4.38171	0.11405	0.90989
2000	1245	99.9982	55.7238	0.154508	16.9363	1.14422	0.00370626	6.16236	0.169772	5.74554	8.55415	4.3817	0.11405	0.90989
2000	1244	99.9982	55.7237	0.154508	16.9363	1.1446	0.00370626	6.16202	0.169772	5.74554	8.55415	4.3817	0.11405	0.90989
2000	1243	99.9983	55.7237	0.154507	16.9363	1.14499	0.00370625	6.16167	0.169772	5.74554	8.55415	4.3817	0.114049	0.909889
2000	1242	99.9983	55.7237	0.154507	16.9363	1.14537	0.00370625	6.16132	0.169772	5.74553	8.55414	4.3817	0.114049	0.909889
2000	1241	99.9984	55.7237	0.154507	16.9363	1.14576	0.00370625	6.16097	0.169772	5.74553	8.55414	4.3817	0.114049	0.909889
2000	1240	99.9984	55.7237	0.154507	16.9363	1.14615	0.00370625	6.16061	0.169772	5.74553	8.55414	4.3817	0.114049	0.909888
2000	1239	99.9984	55.7236	0.154507	16.9363	1.14654	0.00370625	6.16026	0.169772	5.74553	8.55413	4.38169	0.114049	0.909888
2000	1238	99.9985	55.7236	0.154507	16.9363	1.14694	0.00370625	6.1599	0.169771	5.74552	8.55413	4.38169	0.114049	0.909888
2000	1237	99.9985	55.7236	0.154507	16.9363	1.14733	0.00370625	6.15954	0.169771	5.74552	8.55413	4.38169	0.114049	0.909887
2000	1236	99.9986	55.7236	0.154507	16.9363	1.14773	0.00370624	6.15918	0.169771	5.74552	8.55412	4.38169	0.114049	0.909887
2000	1235	99.9986	55.7235	0.154507	16.9363	1.14813	0.00370624	6.15882	0.169771	5.74552	8.55412	4.38169	0.114049	0.909886
2000	1234	99.9986	55.7235	0.154507	16.9363	1.14853	0.00370624	6.15845	0.169771	5.74552	8.55412	4.38169	0.114049	0.909886
2000	1233	99.9987	55.7235	0.154507	16.9363	1.14894	0.00370624	6.15809	0.169771	5.74551	8.55411	4.38168	0.114049	0.909886
2000	1232	99.9987	55.7235	0.154507	16.9362	1.14934	0.00370624	6.15772	0.169771	5.74551	8.55411	4.38168	0.114049	0.909885
2000	1231	99.9988	55.7235	0.154507	16.9362	1.14975	0.00370624	6.15735	0.169771	5.74551	8.55411	4.38168	0.114049	0.909885
2000	1230	99.9988	55.7234	0.154507	16.9362	1.15016	0.00370623	6.15697	0.169771	5.74551	8.5541	4.38168	0.114049	0.909885
2000	1229	99.9988	55.7234	0.154507	16.9362	1.15057	0.00370623	6.1566	0.169771	5.7455	8.5541	4.38168	0.114049	0.909884
2000	1228	99.9989	55.7234	0.154507	16.9362	1.15099	0.00370623	6.15622	0.169771	5.7455	8.5541	4.38167	0.114049	0.909884
2000	1227	99.9989	55.7234	0.154506	16.9362	1.15141	0.00370623	6.15584	0.169771	5.7455	8.55409	4.38167	0.114049	0.909884
2000	1226	99.999	55.7233	0.154506	16.9362	1.15183	0.00370623	6.15546	0.169771	5.7455	8.55409	4.38167	0.114049	0.909883
2000	1225	99.999	55.7233	0.154506	16.9362	1.15225	0.00370623	6.15508	0.169771	5.74549	8.55409	4.38167	0.114049	0.909883
2000	1224	99.999	55.7233	0.154506	16.9362	1.15267	0.00370623	6.1547	0.169771	5.74549	8.55408	4.38167	0.114049	0.909882
2000	1223	99.9991	55.7233	0.154506	16.9362	1.1531	0.00370622	6.15431	0.16977	5.74549	8.55408	4.38167	0.114049	0.909882
2000	1222	99.9991	55.7232	0.154506	16.9362	1.15353	0.00370622	6.15392	0.16977	5.74549	8.55407	4.38166	0.114049	0.909882
2000	1221	99.9992	55.7232	0.154506	16.9362	1.15396	0.00370622	6.15353	0.16977	5.74548	8.55407	4.38166	0.114048	0.909881
2000	1220	99.9992	55.7232	0.154506	16.9362	1.15439	0.00370622	6.15314	0.16977	5.74548	8.55407	4.38166	0.114048	0.909881
2000	1219	99.9993	55.7232	0.154506	16.9362	1.15482	0.00370622	6.15275	0.16977	5.74548	8.55406	4.38166	0.114048	0.90988
2000	1218	99.9993	55.7231	0.154506	16.9361	1.15526	0.00370622	6.15235	0.16977	5.74548	8.55406	4.38166	0.114048	0.90988
2000	1217	99.9994	55.7231	0.154506	16.9361	1.1557	0.00370621	6.15195	0.16977	5.74547	8.55406	4.38165	0.114048	0.90988
2000	1216	99.9994	55.7231	0.154506	16.9361	1.15614	0.00370621	6.15155	0.16977	5.74547	8.55405	4.38165	0.114048	0.909879
2000	1215	99.9994	55.7231	0.154506	16.9361	1.15658	0.00370621	6.15115	0.16977	5.74547	8.55405	4.38165	0.114048	0.909879
2000	1214	99.9995	55.723	0.154506	16.9361	1.15703	0.00370621	6.15075	0.16977	5.74547	8.55404	4.38165	0.114048	0.909878
2000	1213	99.9995	55.723	0.154506	16.9361	1.15748	0.00370621	6.15034	0.16977	5.74546	8.55404	4.38165	0.114048	0.909878
2000	1212	99.9996	55.723	0.154505	16.9361	1.15793	0.00370621	6.14993	0.16977	5.74546	8.55404	4.38164	0.114048	0.909878
2000	1211	99.9996	55.723	0.154505	16.9361	1.15838	0.0037062	6.14952	0.16977	5.74546	8.55403	4.38164	0.114048	0.909877
2000	1210	99.9997	55.7229	0.154505	16.9361	1.15883	0.0037062	6.14911	0.169769	5.74546	8.55403	4.38164	0.114048	0.909877
2000	1209	99.9997	55.7229	0.154505	16.9361	1.15929	0.0037062	6.14869	0.169769	5.74545	8.55403	4.38164	0.114048	0.909876
2000	1208	99.9998	55.7229	0.154505	16.9361	1.15975	0.0037062	6.14828	0.169769	5.74545	8.55402	4.38164	0.114048	0.909876
2000	1207	99.9998	55.7229	0.154505	16.9361	1.16021	0.0037062	6.14786	0.169769	5.74545	8.55402	4.38163	0.114048	0.909875
2000	1206	99.9999	55.7228	0.154505	16.9361	1.16068	0.0037062	6.14744	0.169769	5.74545	8.55401	4.38163	0.114048	0.909875
2000	1205	99.9999	55.7228	0.154505	16.936	1.16114	0.00370619	6.14701	0.169769	5.74544	8.55401	4.38163	0.114048	0.909875
2000	1204	99.9999	55.7228	0.154505	16.936	1.16161	0.00370619	6.14659	0.169769	5.74544	8.55401	4.38163	0.114048	0.909874
2000	1203	100	55.7228	0.154505	16.936	1.16208	0.00370619	6.14616	0.169769	5.74544	8.554	4.38163	0.114048	0.909874
2000	1202	100	55.7227	0.154505	16.936	1.16255	0.00370619	6.14573	0.169769	5.74543	8.554	4.38162	0.114047	0.909873
2000	1201	100	55.7227	0.154505	16.936	1.16303	0.00370619	6.1453	0.169769	5.74543	8.55399	4.38162	0.114047	0.909873
2000	1200	100	55.7227	0.154505	16.936	1.16351	0.00370619	6.14487	0.169769	5.74543	8.55399	4.38162	0.114047	0.909872
2000	1199	100	55.7227	0.154505	16.936	1.16399	0.00370618	6.14443	0.169769	5.74543	8.55398	4.38162	0.114047	0.909872
2000	1198	100	55.7226	0.154504	16.936	1.16447	0.00370618	6.144	0.169769	5.74542	8.55398	4.38162	0.114047	0.909872
2000	1197	100	55.7226	0.154504	16.936	1.16495	0.00370618	6.14356	0.169768	5.74542	8.55398	4.38161	0.114047	0.909871
2000	1196	100	55.7226	0.154504	16.936	1.16544	0.00370618	6.14311	0.169768	5.74542	8.55397	4.38161	0.114047	0.909871
2000	1195	100	55.7225	0.154504	16.936	1.16593	0.00370618	6.14267	0.169768	5.74541	8.55397	4.38161	0.114047	0.90987
2000	1194	100	55.7225	0.154504	16.936	1.16642	0.00370617	6.14222	0.169768	5.74541	8.55396	4.38161	0.114047	0.90987
2000	1193	100	55.7225	0.154504	16.9359	1.16692	0.00370617	6.14178	0.169768	5.74541	8.55396	4.3816	0.114047	0.909869
2000	1192	100.001	55.7225	0.154504	16.9359	1.16742	0.00370617	6.14132	0.169768	5.74541	8.55396	4.3816	0.114047	0.909869
2000	1191	100.001	55.7224	0.154504	16.9359	1.16791	0.00370617	6.14087	0.169768	5.7454	8.55395	4.3816	0.114047	0.909868
2000	1190	100.001	55.7224	0.154504	16.9359	1.16842	0.00370617	6.14042	0.169768	5.7454	8.55395	4.3816	0.114047	0.909868
2000	1189	100.001	55.7224	0.154504	16.9359	1.16892	0.00370617	6.13996	0.169768	5.7454	8.55394	4.3816	0.114047	0.909868
2000	1188	100.001	55.7224	0.154504	16.9359	1.16943	0.00370616	6.1395	0.169768	5.74539	8.55394	4.38159	0.114047	0.909867
2000	1187	100.001	55.7223	0.154504	16.9359	1.16994	0.00370616	6.13904	0.169768	5.74539	8.55393	4.38159	0.114047	0.909867
2000	1186	100.001	55.7223	0.154504	16.9359	1.17045	0.00370616	6.13857	0.169767	5.74539	8.55393	4.38159	0.114047	0.909866
2000	1185	100.001	55.7223	0.154503	16.9359	1.17096	0.00370616	6.13811	0.169767	5.74539	8.55392	4.38159	0.114047	0.909866
2000	1184	100.001	55.7222	0.154503	16.9359	1.17148	0.00370616	6.13764	0.169767	5.74538	8.55392	4.38158	0.114046	0.909865
2000	1183	100.001	55.7222	0.154503	16.9359	1.172	0.00370615	6.13717	0.169767	5.74538	8.55392	4.38158	0.114046	0.909865
2000	1182	100.001	55.7222	0.154503	16.9359	1.17252	0.00370615	6.1367	0.169767	5.74538	8.55391	4.38158	0.114046	0.909864
2000	1181	100.001	55.7221	0.154503	16.9358	1.17304	0.00370615	6.13622	0.169767	5.74537	8.55391	4.38158	0.114046	0.909864
2000	1180	100.001	55.7221	0.154503	16.9358	1.17357	0.00370615	6.13574	0.169767	5.74537	8.5539	4.38158	0.114046	0.909863
2000	1179	100.001	55.7221	0.154503	16.9358	1.1741	0.00370615	6.13526	0.169767	5.74537	8.5539	4.38157	0.114046	0.909863
2000	1178	100.001	55.7221	0.154503	16.9358	1.17463	0.00370614	6.13478	0.169767	5.74536	8.55389	4.38157	0.114046	0.909862
2000	1177	100.001	55.722	0.154503	16.9358	1.17516	0.00370614	6.1343	0.169767	5.74536	8.55389	4.38157	0.114046	0.909862
2000	1176	100.001	55.722	0.154503	16.9358	1.1757	0.00370614	6.13381	0.169767	5.74536	8.55388	4.38157	0.114046	0.909861
2000	1175	100.001	55.722	0.154503	16.9358	1.17624	0.00370614	6.13332	0.169766	5.74536	8.55388	4.38156	0.114046	0.909861
2000	1174	100.001	55.7219	0.154503	16.9358	1.17678	0.00370614	6.13283	0.169766	5.74535	8.55388	4.38156	0.114046	0.90986
2000	1173	99.804	55.7234	0.154778	16.9647	1.17686	0.00371347	6.12533	0.170102	5.69845	8.56658	4.39018	0.114271	0.911661
2000	1172	99.6782	55.7243	0.154954	16.9832	1.17711	0.00371816	6.12031	0.170317	5.66851	8.57468	4.39569	0.114416	0.912811
2000	1171	99.5529	55.7252	0.15513	17.0016	1.17734	0.00372284	6.11527	0.170531	5.63867	8.58275	4.40119	0.11456	0.91396
2000	1170	98.9148	55.7478	0.156093	16.9797	1.18164	0.00374685	6.13021	0.171631	5.60225	8.57566	4.41611	0.115243	0.919856
2000	1169	97.9209	55.786	0.157626	16.9287	1.18886	0.00378488	6.15948	0.173373	5.56125	8.55769	4.43775	0.116315	0.929192
2000	1168	96.9469	55.8239	0.159159	16.8778	1.19607	0.00382291	6.18859	0.175115	5.52052	8.53981	4.45928	0.117385	0.938528
2000	1167	95.9921	55.8617	0.160692	16.8271	1.20325	0.00386093	6.21751	0.176857	5.48004	8.522	4.4807	0.118455	0.947863
2000	1166	95.0561	55.8993	0.162224	16.7764	1.21042	0.00389895	6.24626	0.178599	5.43981	8.50429	4.50202	0.119523	0.957197
2000	1165	94.1381	55.9368	0.163757	16.7259	1.21758	0.00393697	6.27484	0.18034	5.39984	8.48665	4.52324	0.120589	0.966531
2000	1164	93.2378	55.9741	0.165289	16.6755	1.22471	0.00397499	6.30325	0.182082	5.36011	8.46909	4.54435	0.121655	0.975864
2000	1163	92.2572	56.0183	0.166818	16.6603	1.23026	0.00401724	6.33176	0.184017	5.30924	8.4137	4.57255	0.122862	0.986236
2000	1162	91.3224	56.0604	0.168344	16.6359	1.23618	0.00405836	6.36002	0.185901	5.26174	8.36835	4.5987	0.12403	0.996332
2000	1161	90.4073	56.1023	0.169867	16.6114	1.24208	0.00409944	6.3881	0.187782	5.21469	8.32333	4.62467	0.125195	1.00642
2000	1160	89.5114	56.144	0.171386	16.5868	1.24796	0.00414047	6.416	0.189662	5.16806	8.27863	4.65046	0.126357	1.01649
2000	1159	88.6339	56.1856	0.172902	16.562	1.25382	0.00418146	6.44373	0.191539	5.12185	8.23425	4.67606	0.127517	1.02655
2000	1158	87.7744	56.2269	0.174415	16.5371	1.25965	0.0042224	6.47129	0.193415	5.07607	8.19019	4.70149	0.128675	1.0366
2000	1157	86.9323	56.268	0.175924	16.5121	1.26547	0.00426331	6.49867	0.195289	5.0307	8.14643	4.72674	0.12983	1.04665
2000	1156	86.0837	56.3116	0.177476	16.4876	1.27059	0.00430533	6.52149	0.197214	4.98552	8.10342	4.7528	0.131016	1.05696
2000	1155	85.2473	56.3552	0.179038	16.4625	1.27573	0.00434758	6.54408	0.199149	4.94027	8.06134	4.7788	0.132208	1.06733
2000	1154	84.4277	56.3986	0.180597	16.4373	1.28084	0.00438978	6.56651	0.201082	4.89544	8.01956	4.80462	0.133396	1.0777
2000	1153	83.6244	56.4418	0.182152	16.4119	1.28594	0.00443195	6.58877	0.203014	4.85102	7.97806	4.83027	0.134583	1.08805
2000	1152	82.837	56.4848	0.183705	16.3864	1.29103	0.00447408	6.61088	0.204943	4.80701	7.93684	4.85575	0.135767	1.09839
2000	1151	82.0649	56.5277	0.185254	16.3607	1.29609	0.00451617	6.63284	0.206871	4.7634	7.8959	4.88106	0.136948	1.10872
2000	1150	81.3078	56.5703	0.1868	16.335	1.30114	0.00455822	6.65464	0.208798	4.72019	7.85523	4.90621	0.138127	1.11905
2000	1149	80.5651	56.6127	0.188344	16.3091	1.30618	0.00460024	6.67629	0.210723	4.67737	7.81485	4.93118	0.139304	1.12936
2000	1148	79.8365	56.655	0.189884	16.2831	1.31119	0.00464223	6.69779	0.212646	4.63493	7.77473	4.95599	0.140478	1.13967
2000	1147	79.1215	56.697	0.191422	16.2569	1.3162	0.00468417	6.71914	0.214567	4.59289	7.73488	4.98064	0.14165	1.14997
2000	1146	78.4199	56.7389	0.192957	16.2307	1.32119	0.00472609	6.74036	0.216487	4.55122	7.6953	5.00512	0.14282	1.16026
2000	1145	77.7311	56.7806	0.194489	16.2043	1.32616	0.00476796	6.76143	0.218405	4.50993	7.65599	5.02944	0.143987	1.17054
2000	1144	77.0548	56.8221	0.196018	16.1778	1.33112	0.00480981	6.78236	0.220322	4.46901	7.61694	5.05361	0.145152	1.18081
2000	1143	76.3908	56.8634	0.197545	16.1512	1.33607	0.00485162	6.80315	0.222237	4.42845	7.57814	5.07761	0.146315	1.19108
2000	1142	75.7386	56.9045	0.199068	16.1244	1.341	0.0048934	6.82381	0.224151	4.38827	7.53961	5.10145	0.147475	1.20133
2000	1141	75.098	56.9455	0.20059	16.0976	1.34592	0.00493514	6.84433	0.226063	4.34844	7.50133	5.12514	0.148634	1.21158
2000	1140	74.4685	56.9862	0.202108	16.0706	1.35083	0.00497685	6.86473	0.227974	4.30897	7.46331	5.14868	0.14979	1.22182
2000	1139	73.85	57.0268	0.203625	16.0435	1.35573	0.00501854	6.88499	0.229883	4.26985	7.42553	5.17206	0.150943	1.23206
2000	1138	73.2422	57.0672	0.205138	16.0164	1.36061	0.00506018	6.90512	0.231791	4.23107	7.38801	5.19528	0.152095	1.24228
2000	1137	72.6447	57.1074	0.206649	15.9891	1.36548	0.0051018	6.92513	0.233698	4.19265	7.35073	5.21836	0.153244	1.2525
2000	1136	72.0573	57.1474	0.208158	15.9617	1.37034	0.00514339	6.94502	0.235603	4.15456	7.3137	5.24129	0.154391	1.26271
2000	1135	71.4797	57.1873	0.209664	15.9342	1.37519	0.00518495	6.96478	0.237506	4.11681	7.27691	5.26406	0.155536	1.27291
2000	1134	70.9117	57.227	0.211168	15.9065	1.38003	0.00522648	6.98442	0.239409	4.0794	7.24036	5.28669	0.156679	1.28311
2000	1133	70.3531	57.2665	0.21267	15.8788	1.38486	0.00526799	7.00394	0.24131	4.04232	7.20405	5.30917	0.15782	1.2933
2000	1132	69.8035	57.3058	0.21417	15.851	1.38968	0.00530946	7.02334	0.24321	4.00556	7.16797	5.33151	0.158958	1.30348
2000	1131	69.2629	57.345	0.215667	15.8231	1.39449	0.00535091	7.04262	0.245108	3.96912	7.13213	5.3537	0.160095	1.31365
2000	1130	68.7308	57.3839	0.217162	15.7951	1.39929	0.00539233	7.06179	0.247005	3.93301	7.09653	5.37575	0.161229	1.32382
2000	1129	68.2073	57.4228	0.218655	15.7669	1.40409	0.00543372	7.08085	0.248902	3.89721	7.06115	5.39766	0.162362	1.33398
2000	1128	67.6919	57.4614	0.220146	15.7387	1.40887	0.00547509	7.0998	0.250796	3.86173	7.026	5.41943	0.163492	1.34414
2000	1127	67.1846	57.4999	0.221635	15.7104	1.41364	0.00551643	7.11863	0.25269	3.82655	6.99108	5.44105	0.16462	1.35429
2000	1126	66.6851	57.5382	0.223121	15.682	1.41841	0.00555775	7.13736	0.254583	3.79168	6.95638	5.46254	0.165746	1.36443
2000	1125	66.1933	57.5763	0.224606	15.6535	1.42317	0.00559904	7.15598	0.256474	3.75712	6.9219	5.48389	0.16687	1.37457
2000	1124	65.709	57.6143	0.226089	15.6249	1.42792	0.00564031	7.17449	0.258365	3.72285	6.88765	5.50511	0.167993	1.3847
2000	1123	65.232	57.6521	0.22757	15.5962	1.43266	0.00568156	7.1929	0.260254	3.68888	6.85361	5.52619	0.169113	1.39483
2000	1122	64.7621	57.6897	0.229049	15.5675	1.43739	0.00572278	7.2112	0.262142	3.65521	6.8198	5.54713	0.170231	1.40495
2000	1121	64.2991	57.7272	0.230526	15.5386	1.44212	0.00576398	7.2294	0.26403	3.62182	6.78619	5.56794	0.171347	1.41506
2000	1120	63.843	57.7645	0.232001	15.5097	1.44684	0.00580516	7.2475	0.265916	3.58873	6.7528	5.58862	0.172462	1.42517
2000	1119	63.3935	57.8017	0.233475	15.4806	1.45156	0.00584632	7.2655	0.267802	3.55591	6.71963	5.60917	0.173574	1.43528
2000	1118	62.9505	57.8386	0.234947	15.4515	1.45626	0.00588746	7.2834	0.269686	3.52338	6.68666	5.62958	0.174684	1.44538
2000	1117	62.5139	57.8755	0.236417	15.4223	1.46096	0.00592858	7.3012	0.27157	3.49113	6.6539	5.64987	0.175793	1.45547
2000	1116	62.0835	57.9121	0.237886	15.393	1.46566	0.00596969	7.31891	0.273452	3.45916	6.62134	5.67003	0.1769	1.46556
2000	1115	61.6592	57.9486	0.239353	15.3636	1.47035	0.00601077	7.33652	0.275334	3.42745	6.589	5.69006	0.178004	1.47565
2000	1114	61.2408	57.985	0.240818	15.3342	1.47503	0.00605183	7.35403	0.277215	3.39602	6.55685	5.70997	0.179107	1.48573
2000	1113	60.8282	58.0212	0.242282	15.3046	1.47971	0.00609288	7.37145	0.279096	3.36485	6.52491	5.72975	0.180209	1.49581
2000	1112	60.4213	58.0572	0.243744	15.275	1.48439	0.00613391	7.38878	0.280975	3.33395	6.49316	5.74941	0.181308	1.50588
2000	1111	60.02	58.0931	0.245205	15.2453	1.48906	0.00617493	7.40602	0.282854	3.30331	6.46161	5.76894	0.182405	1.51595
2000	1110	59.6241	58.1289	0.246664	15.2156	1.49372	0.00621593	7.42317	0.284732	3.27293	6.43026	5.78835	0.183501	1.52602
2000	1109	59.2336	58.1644	0.248122	15.1857	1.49838	0.00625691	7.44023	0.286609	3.24281	6.39911	5.80764	0.184595	1.53608
2000	1108	58.8482	58.1999	0.249579	15.1558	1.50303	0.00629788	7.4572	0.288486	3.21294	6.36815	5.82681	0.185687	1.54614
2000	1107	58.468	58.2351	0.251034	15.1258	1.50768	0.00633883	7.47408	0.290362	3.18332	6.33737	5.84586	0.186777	1.55619
2000	1106	58.0928	58.2703	0.252488	15.0958	1.51233	0.00637978	7.49088	0.292237	3.15396	6.30679	5.86479	0.187866	1.56624
2000	1105	57.7225	58.3053	0.253941	15.0656	1.51697	0.00642071	7.50758	0.294112	3.12483	6.2764	5.8836	0.188953	1.57629
2000	1104	57.3569	58.3401	0.255392	15.0354	1.52161	0.00646162	7.52421	0.295987	3.09595	6.2462	5.9023	0.190038	1.58634
2000	1103	56.9961	58.3748	0.256843	15.0052	1.52625	0.00650253	7.54075	0.29786	3.06732	6.21618	5.92088	0.191122	1.59638
2000	1102	56.6399	58.4093	0.258292	14.9748	1.53088	0.00654342	7.55721	0.299734	3.03892	6.18634	5.93934	0.192203	1.60642
2000	1101	56.2882	58.4437	0.25974	14.9444	1.53551	0.00658431	7.57358	0.301606	3.01076	6.15669	5.95769	0.193284	1.61645
2000	1100	55.941	58.4779	0.261187	14.9139	1.54013	0.00662518	7.58987	0.303479	2.98283	6.12721	5.97593	0.194362	1.62649
2000	1099	55.598	58.512	0.262632	14.8834	1.54475	0.00666605	7.60608	0.305351	2.95513	6.09792	5.99406	0.195439	1.63652
2000	1098	55.2593	58.546	0.264077	14.8528	1.54937	0.0067069	7.62221	0.307222	2.92766	6.06881	6.01207	0.196514	1.64655
2000	1097	54.9248	58.5798	0.265521	14.8221	1.55399	0.00674775	7.63826	0.309093	2.90042	6.03987	6.02997	0.197588	1.65658
2000	1096	54.5944	58.6135	0.266964	14.7914	1.5586	0.00678859	7.65423	0.310964	2.87341	6.01111	6.04777	0.198659	1.66661
2000	1095	54.268	58.647	0.268405	14.7606	1.56322	0.00682942	7.67013	0.312834	2.84662	5.98252	6.06545	0.19973	1.67663
2000	1094	53.9455	58.6804	0.269846	14.7297	1.56782	0.00687025	7.68594	0.314704	2.82004	5.9541	6.08303	0.200799	1.68665
2000	1093	53.6269	58.7137	0.271286	14.6988	1.57243	0.00691107	7.70168	0.316574	2.79369	5.92586	6.1005	0.201866	1.69667
2000	1092	53.312	58.7468	0.272725	14.6679	1.57704	0.00695188	7.71734	0.318444	2.76755	5.89778	6.11786	0.202931	1.70669
2000	1091	53.0009	58.7798	0.274163	14.6368	1.58164	0.00699269	7.73292	0.320313	2.74163	5.86987	6.13511	0.203995	1.71671
2000	1090	52.6934	58.8127	0.275601	14.6057	1.58624	0.0070335	7.74843	0.322182	2.71591	5.84213	6.15227	0.205058	1.72673
2000	1089	52.3895	58.8454	0.277038	14.5746	1.59084	0.0070743	7.76387	0.324051	2.69041	5.81456	6.16931	0.206119	1.73675
2000	1088	52.0891	58.878	0.278473	14.5434	1.59544	0.00711509	7.77923	0.32592	2.66512	5.78715	6.18626	0.207178	1.74676
2000	1087	51.7922	58.9104	0.279909	14.5121	1.60004	0.00715589	7.79451	0.327789	2.64003	5.7599	6.2031	0.208236	1.75678
2000	1086	51.4986	58.9427	0.281343	14.4808	1.60463	0.00719668	7.80973	0.329657	2.61514	5.73282	6.21984	0.209293	1.76679
2000	1085	51.2083	58.9749	0.282777	14.4495	1.60923	0.00723747	7.82487	0.331526	2.59046	5.70589	6.23648	0.210348	1.77681
2000	1084	50.9214	59.007	0.28421	14.418	1.61382	0.00727826	7.83994	0.333394	2.56597	5.67913	6.25302	0.211401	1.78682
2000	1083	50.6376	59.0389	0.285643	14.3866	1.61841	0.00731905	7.85493	0.335263	2.54169	5.65252	6.26946	0.212453	1.79683
2000	1082	50.3569	59.0707	0.287075	14.355	1.623	0.00735984	7.86986	0.337131	2.5176	5.62607	6.2858	0.213504	1.80685
2000	1081	50.0794	59.1024	0.288506	14.3235	1.62759	0.00740063	7.88471	0.339	2.4937	5.59978	6.30204	0.214553	1.81686
2000	1080	49.8049	59.1339	0.289937	14.2919	1.63218	0.00744142	7.89949	0.340868	2.46999	5.57364	6.31818	0.2156	1.82688
2000	1079	49.5334	59.1653	0.291367	14.2602	1.63677	0.00748221	7.9142	0.342737	2.44648	5.54765	6.33423	0.216647	1.83689
2000	1078	49.2648	59.1966	0.292797	14.2285	1.64136	0.007523	7.92885	0.344605	2.42315	5.52182	6.35019	0.217692	1.84691
2000	1077	48.999	59.2278	0.294227	14.1967	1.64595	0.0075638	7.94342	0.346474	2.40001	5.49614	6.36605	0.218735	1.85692
2000	1076	48.7362	59.2588	0.295656	14.1649	1.65054	0.0076046	7.95792	0.348343	2.37706	5.4706	6.38181	0.219777	1.86694
2000	1075	48.4761	59.2898	0.297084	14.1331	1.65513	0.0076454	7.97236	0.350212	2.35429	5.44522	6.39748	0.220818	1.87695
2000	1074	48.2187	59.3206	0.298513	14.1012	1.65971	0.00768621	7.98672	0.352081	2.3317	5.41998	6.41306	0.221857	1.88697
2000	1073	47.964	59.3512	0.29994	14.0692	1.6643	0.00772702	8.00102	0.35395	2.30929	5.39489	6.42854	0.222895	1.89699
2000	1072	47.712	59.3818	0.301368	14.0372	1.66889	0.00776784	8.01525	0.35582	2.28705	5.36994	6.44394	0.223932	1.90701
2000	1071	47.4626	59.4122	0.302795	14.0052	1.67348	0.00780866	8.02941	0.35769	2.265	5.34514	6.45924	0.224967	1.91703
2000	1070	47.2157	59.4426	0.304222	13.9731	1.67806	0.00784949	8.04351	0.35956	2.24311	5.32048	6.47446	0.226001	1.92706
2000	1069	46.9714	59.4728	0.305649	13.941	1.68265	0.00789032	8.05754	0.361431	2.2214	5.29597	6.48958	0.227033	1.93708
2000	1068	46.7295	59.5028	0.307075	13.9089	1.68724	0.00793116	8.0715	0.363301	2.19987	5.27159	6.50462	0.228065	1.94711
2000	1067	46.49	59.5328	0.308501	13.8767	1.69183	0.00797201	8.08539	0.365173	2.1785	5.24736	6.51957	0.229095	1.95714
2000	1066	46.253	59.5627	0.309927	13.8445	1.69642	0.00801287	8.09922	0.367044	2.1573	5.22326	6.53443	0.230123	1.96717
2000	1065	46.0183	59.5924	0.311353	13.8122	1.70101	0.00805373	8.11298	0.368916	2.13626	5.1993	6.5492	0.231151	1.9772
2000	1064	45.7859	59.622	0.312779	13.7799	1.7056	0.00809461	8.12667	0.370788	2.11539	5.17547	6.56389	0.232177	1.98723
2000	1063	45.5558	59.6515	0.314204	13.7475	1.71019	0.00813549	8.1403	0.372661	2.09469	5.15179	6.57849	0.233202	1.99727
2000	1062	45.328	59.6809	0.31563	13.7152	1.71478	0.00817639	8.15386	0.374535	2.07415	5.12823	6.59301	0.234225	2.00731
2000	1061	45.1023	59.7102	0.317055	13.6827	1.71937	0.00821729	8.16736	0.376408	2.05376	5.10481	6.60745	0.235248	2.01735
2000	1060	44.8789	59.7394	0.31848	13.6503	1.72396	0.00825821	8.18079	0.378282	2.03354	5.08153	6.6218	0.236269	2.0274
2000	1059	44.6575	59.7685	0.319905	13.6178	1.72856	0.00829914	8.19416	0.380157	2.01347	5.05837	6.63607	0.237289	2.03745
2000	1058	44.4383	59.7974	0.321331	13.5853	1.73315	0.00834008	8.20746	0.382033	1.99356	5.03535	6.65025	0.238307	2.0475
2000	1057	44.2212	59.8263	0.322756	13.5528	1.73774	0.00838103	8.22069	0.383908	1.97381	5.01245	6.66436	0.239325	2.05755
2000	1056	44.0061	59.855	0.324181	13.5202	1.74234	0.00842199	8.23386	0.385785	1.95421	4.98968	6.67838	0.240341	2.06761
2000	1055	43.793	59.8837	0.325606	13.4876	1.74694	0.00846297	8.24696	0.387662	1.93475	4.96704	6.69233	0.241356	2.07767
2000	1054	43.5819	59.9122	0.327031	13.4549	1.75154	0.00850396	8.26	0.38954	1.91545	4.94453	6.70619	0.24237	2.08773
2000	1053	43.3728	59.9406	0.328457	13.4222	1.75613	0.00854497	8.27298	0.391418	1.8963	4.92215	6.71998	0.243383	2.0978
2000	1052	43.1655	59.9689	0.329882	13.3895	1.76073	0.00858599	8.28588	0.393297	1.8773	4.89988	6.73369	0.244394	2.10787
2000	1051	42.9602	59.9972	0.331308	13.3568	1.76533	0.00862703	8.29873	0.395177	1.85844	4.87774	6.74732	0.245404	2.11795
2000	1050	42.7567	60.0253	0.332733	13.3241	1.76994	0.00866809	8.31151	0.397058	1.83973	4.85573	6.76087	0.246413	2.12802
2000	1049	42.5551	60.0533	0.334159	13.2913	1.77454	0.00870916	8.32422	0.398939	1.82117	4.83383	6.77435	0.247421	2.13811
2000	1048	42.3553	60.0812	0.335585	13.2584	1.77914	0.00875024	8.33687	0.400821	1.80274	4.81206	6.78775	0.248428	2.14819
2000	1047	42.1573	60.109	0.337011	13.2256	1.78375	0.00879135	8.34945	0.402704	1.78446	4.79041	6.80108	0.249434	2.15829
2000	1046	41.961	60.1367	0.338437	13.1927	1.78836	0.00883247	8.36197	0.404588	1.76631	4.76888	6.81433	0.250438	2.16838
2000	1045	41.7664	60.1644	0.339864	13.1598	1.79296	0.00887361	8.37442	0.406472	1.74831	4.74746	6.82751	0.251442	2.17848
2000	1044	41.5736	60.1919	0.34129	13.1269	1.79757	0.00891477	8.3868	0.408357	1.73044	4.72616	6.84062	0.252444	2.18859
2000	1043	41.3825	60.2193	0.342717	13.094	1.80218	0.00895595	8.39912	0.410244	1.71271	4.70498	6.85365	0.253445	2.19869
2000	1042	41.193	60.2466	0.344144	13.061	1.8068	0.00899714	8.41138	0.412131	1.69512	4.68392	6.86661	0.254445	2.20881
2000	1041	41.0051	60.2739	0.345572	13.028	1.81141	0.00903836	8.42357	0.414019	1.67766	4.66297	6.8795	0.255444	2.21893
2000	1040	40.8179	60.3021	0.346926	12.9951	1.81589	0.00880347	8.43488	0.415918	1.66025	4.6421	6.89247	0.256448	2.22911
2000	1039	40.6321	60.3304	0.348263	12.9622	1.82034	0.00853274	8.44598	0.41782	1.64297	4.62135	6.90539	0.257452	2.2393
2000	1038	40.4478	60.3587	0.349594	12.9292	1.82479	0.00826218	8.45698	0.419724	1.62582	4.60071	6.91825	0.258456	2.2495
2000	1037	40.2651	60.3869	0.35092	12.8962	1.82923	0.00799181	8.46788	0.421628	1.6088	4.58018	6.93105	0.259458	2.25971
2000	1036	40.0838	60.4151	0.35224	12.8632	1.83367	0.00772167	8.47868	0.423535	1.59192	4.55975	6.94378	0.260459	2.26993
2000	1035	39.9041	60.4432	0.353556	12.8302	1.83811	0.00745185	8.48939	0.425442	1.57515	4.53944	6.95644	0.26146	2.28015
2000	1034	39.7258	60.4713	0.354865	12.7972	1.84254	0.00718241	8.5	0.427351	1.55852	4.51924	6.96904	0.26246	2.29038
2000	1033	39.549	60.4993	0.356168	12.7641	1.84696	0.00691345	8.51051	0.429262	1.54201	4.49914	6.98158	0.263459	2.30062
2000	1032	39.3736	60.5272	0.357465	12.731	1.85138	0.00664507	8.52091	0.431174	1.52563	4.47915	6.99406	0.264457	2.31087
2000	1031	39.1996	60.5551	0.358755	12.6979	1.8558	0.0063774	8.53121	0.433088	1.50937	4.45926	7.00648	0.265455	2.32113
2000	1030	39.027	60.583	0.360037	12.6648	1.86021	0.00611057	8.5414	0.435004	1.49323	4.43948	7.01883	0.266451	2.3314
2000	1029	38.8558	60.6109	0.361311	12.6317	1.86461	0.00584473	8.55149	0.436921	1.47722	4.4198	7.03113	0.267447	2.34167
2000	1028	38.6858	60.6387	0.362577	12.5985	1.86901	0.00558006	8.56146	0.43884	1.46133	4.40023	7.04337	0.268443	2.35196
2000	1027	38.5173	60.6664	0.363833	12.5654	1.8734	0.00531675	8.57132	0.440761	1.44556	4.38075	7.05555	0.269437	2.36225
2000	1026	38.35	60.6942	0.36508	12.5322	1.87778	0.00505499	8.58107	0.442683	1.4299	4.36138	7.06767	0.270431	2.37255
2000	1025	38.184	60.7219	0.366317	12.499	1.88216	0.00479503	8.5907	0.444608	1.41437	4.34211	7.07974	0.271424	2.38287
2000	1024	38.0192	60.7496	0.367543	12.4658	1.88652	0.00453711	8.6002	0.446534	1.39895	4.32294	7.09175	0.272417	2.39319
2000	1023	37.8557	60.7773	0.368757	12.4326	1.89088	0.00428151	8.60959	0.448463	1.38365	4.30387	7.10371	0.273409	2.40353
2000	1022	37.6935	60.8049	0.369959	12.3994	1.89523	0.00402853	8.61885	0.450393	1.36847	4.28489	7.11561	0.274401	2.41388
2000	1021	37.5324	60.8326	0.371148	12.3661	1.89957	0.0037785	8.62798	0.452326	1.3534	4.26602	7.12746	0.275392	2.42423
2000	1020	37.3725	60.8602	0.372323	12.3329	1.9039	0.00353176	8.63698	0.454261	1.33845	4.24723	7.13926	0.276382	2.43461
2000	1019	37.2138	60.8878	0.373483	12.2996	1.90822	0.00328869	8.64585	0.456199	1.32361	4.22855	7.15101	0.277372	2.44499
2000	1018	37.0563	60.9155	0.374628	12.2663	1.91252	0.0030497	8.65458	0.458138	1.30888	4.20996	7.1627	0.278362	2.45538
2000	1017	36.8998	60.9431	0.375756	12.233	1.91682	0.00281523	8.66317	0.46008	1.29426	4.19146	7.17435	0.279351	2.46579
2000	1016	36.7445	60.9708	0.376867	12.1997	1.9211	0.00258574	8.67162	0.462025	1.27976	4.17306	7.18595	0.28034	2.47622
2000	1015	36.5903	60.9984	0.377958	12.1664	1.92537	0.00236172	8.67992	0.463972	1.26537	4.15475	7.1975	0.281328	2.48665
2000	1014	36.4372	61.0261	0.37903	12.133	1.92963	0.0021437	8.68807	0.465922	1.25109	4.13653	7.20901	0.282316	2.4971
2000	1013	36.2851	61.0538	0.38008	12.0997	1.93387	0.00193223	8.69606	0.467875	1.23691	4.1184	7.22047	0.283304	2.50757
2000	1012	36.1341	61.0816	0.381108	12.0663	1.9381	0.00172791	8.7039	0.46983	1.22285	4.10037	7.23188	0.284291	2.51805
2000	1011	35.9841	61.1094	0.382112	12.0329	1.94231	0.00153135	8.71157	0.471788	1.20889	4.08242	7.24325	0.285279	2.52854
2000	1010	35.8352	61.1372	0.383091	11.9996	1.94651	0.0013432	8.71907	0.473749	1.19504	4.06456	7.25458	0.286266	2.53905
2000	1009	35.6872	61.165	0.384043	11.9662	1.95068	0.00116413	8.72639	0.475714	1.1813	4.04679	7.26587	0.287253	2.54958
2000	1008	35.5402	61.193	0.384965	11.9327	1.95484	0.00099485	8.73354	0.477681	1.16767	4.02911	7.27711	0.28824	2.56013
2000	1007	35.3942	61.221	0.385856	11.8993	1.95898	0.000836099	8.7405	0.479652	1.15414	4.01151	7.28832	0.289227	2.57069
2000	1006	35.2491	61.249	0.386714	11.8659	1.96309	0.000688635	8.74726	0.481626	1.14072	3.994	7.29949	0.290214	2.58127
2000	1005	35.1049	61.2772	0.387535	11.8324	1.96718	0.000553242	8.75381	0.483604	1.1274	3.97657	7.31063	0.291201	2.59187
2000	1004	34.9616	61.3055	0.388316	11.799	1.97125	0.000430725	8.76014	0.485586	1.11419	3.95923	7.32173	0.292189	2.60249
2000	1003	34.8192	61.3339	0.389052	11.7655	1.97528	0.000321907	8.76623	0.487572	1.10108	3.94197	7.3328	0.293176	2.61314
2000	1002	34.6777	61.3624	0.389735	11.732	1.97928	0.000227621	8.77205	0.489563	1.08808	3.9248	7.34385	0.294165	2.6238
2000	1001	34.5369	61.3912	0.390355	11.6985	1.98324	0.000148699	8.77756	0.491558	1.07519	3.9077	7.35487	0.295154	2.6345
2000	1000	34.3968	61.4203	0.390891	11.665	1.98714	8.59617e-05	8.78266	0.49356	1.0624	3.89068	7.36589	0.296145	2.64523
2000	999	34.2572	61.45	0.391298	11.6315	1.99094	4.01725e-05	8.78716	0.495572	1.04971	3.87373	7.37693	0.297139	2.65601
2000	998	34.1175	61.4809	0.391436	11.5979	1.99454	1.19269e-05	8.79046	0.4976	1.03715	3.85684	7.38808	0.298141	2.66688
2000	997	33.9839	61.5053	0.392801	11.5644	1.99911	0	8.79915	0.499558	1.0246	3.84018	7.39841	0.299101	2.67737
2000	996	33.8177	61.5733	0.385856	11.5308	1.99709	0	8.77104	0.502012	1.0127	3.8226	7.4138	0.300332	2.69052
2000	995	33.6532	61.641	0.379004	11.4971	1.99507	0	8.74296	0.504466	1.00092	3.80513	7.4291	0.301561	2.70368
2000	994	33.4903	61.7086	0.372242	11.4634	1.99303	0	8.71491	0.50692	0.989268	3.78778	7.4443	0.302787	2.71683
2000	993	33.3289	61.7759	0.365569	11.4296	1.99099	0	8.68689	0.509374	0.977736	3.77053	7.45941	0.304011	2.72998
2000	992	33.1691	61.843	0.358986	11.3959	1.98893	0	8.6589	0.511828	0.966325	3.7534	7.47443	0.305233	2.74313
2000	991	33.0109	61.9098	0.35249	11.3621	1.98687	0	8.63093	0.514282	0.955033	3.73639	7.48935	0.306452	2.75628
2000	990	32.8541	61.9765	0.34608	11.3283	1.98479	0	8.60299	0.516735	0.94386	3.71948	7.50419	0.307669	2.76943
2000	989	32.6989	62.043	0.339756	11.2944	1.98271	0	8.57506	0.519189	0.932803	3.70268	7.51894	0.308884	2.78258
2000	988	32.5451	62.1092	0.333517	11.2606	1.98061	0	8.54716	0.521643	0.921861	3.68598	7.5336	0.310096	2.79573
2000	987	32.3927	62.1752	0.327361	11.2267	1.9785	0	8.51928	0.524096	0.911034	3.66939	7.54818	0.311306	2.80889
2000	986	32.2417	62.2411	0.321288	11.1928	1.97638	0	8.49142	0.52655	0.900319	3.65291	7.56267	0.312514	2.82204
2000	985	32.0922	62.3067	0.315296	11.1589	1.97425	0	8.46357	0.529004	0.889715	3.63653	7.57707	0.31372	2.83519
2000	984	31.944	62.3722	0.309385	11.125	1.9721	0	8.43574	0.531458	0.879221	3.62026	7.59139	0.314923	2.84834
2000	983	31.7971	62.4375	0.303554	11.091	1.96994	0	8.40792	0.533912	0.868836	3.60408	7.60563	0.316124	2.86149
2000	982	31.6516	62.5026	0.297803	11.0571	1.96777	0	8.38011	0.536367	0.858558	3.58801	7.61979	0.317323	2.87465
2000	981	31.5075	62.5675	0.292129	11.0231	1.96559	0	8.3523	0.538821	0.848387	3.57204	7.63386	0.31852	2.8878
2000	980	31.3646	62.6322	0.286532	10.9891	1.96339	0	8.32451	0.541276	0.838321	3.55616	7.64785	0.319715	2.90096
2000	979	31.2229	62.6967	0.281012	10.9551	1.96118	0	8.29672	0.543731	0.828359	3.54038	7.66177	0.320907	2.91412
2000	978	31.0826	62.7611	0.275568	10.9211	1.95895	0	8.26894	0.546187	0.8185	3.5247	7.6756	0.322097	2.92728
2000	977	30.9434	62.8253	0.270198	10.887	1.95671	0	8.24116	0.548643	0.808743	3.50912	7.68935	0.323286	2.94044
2000	976	30.8055	62.8893	0.264903	10.853	1.95445	0	8.21339	0.551099	0.799086	3.49363	7.70303	0.324472	2.9536
2000	975	30.6688	62.9532	0.25968	10.8189	1.95218	0	8.18561	0.553555	0.789528	3.47823	7.71664	0.325656	2.96677
2000	974	30.5333	63.0169	0.254531	10.7849	1.94989	0	8.15783	0.556012	0.78007	3.46293	7.73016	0.326838	2.97994
2000	973	30.399	63.0805	0.249452	10.7508	1.94759	0	8.13005	0.558469	0.770708	3.44772	7.74361	0.328017	2.99311
2000	972	30.2658	63.1439	0.244445	10.7167	1.94527	0	8.10226	0.560927	0.761443	3.4326	7.75699	0.329195	3.00628
2000	971	30.1337	63.2071	0.239508	10.6826	1.94293	0	8.07447	0.563385	0.752274	3.41756	7.77029	0.330371	3.01945
2000	970	30.0028	63.2702	0.23464	10.6485	1.94057	0	8.04667	0.565844	0.743199	3.40262	7.78352	0.331544	3.03263
2000	969	29.8729	63.3332	0.229842	10.6144	1.9382	0	8.01886	0.568303	0.734217	3.38777	7.79668	0.332716	3.04581
2000	968	29.7442	63.396	0.225111	10.5803	1.9358	0	7.99104	0.570763	0.725328	3.373	7.80977	0.333885	3.05899
2000	967	29.6166	63.4586	0.220448	10.5462	1.93339	0	7.96321	0.573223	0.71653	3.35832	7.82278	0.335053	3.07218
2000	966	29.49	63.5212	0.215851	10.5121	1.93096	0	7.93537	0.575684	0.707824	3.34373	7.83573	0.336218	3.08537
2000	965	29.3644	63.5836	0.211321	10.478	1.92851	0	7.90751	0.578145	0.699206	3.32922	7.8486	0.337382	3.09856
2000	964	29.2399	63.6458	0.206856	10.4438	1.92604	0	7.87963	0.580607	0.690678	3.31479	7.86141	0.338543	3.11175
2000	963	29.1164	63.708	0.202455	10.4097	1.92355	0	7.85174	0.58307	0.682238	3.30045	7.87415	0.339703	3.12495
2000	962	28.9939	63.77	0.198119	10.3756	1.92104	0	7.82383	0.585533	0.673885	3.28618	7.88683	0.34086	3.13815
2000	961	28.8724	63.8319	0.193847	10.3415	1.91851	0	7.79589	0.587997	0.665619	3.272	7.89943	0.342016	3.15136
2000	960	28.7519	63.8936	0.189637	10.3073	1.91595	0	7.76794	0.590461	0.657437	3.2579	7.91197	0.343169	3.16457
2000	959	28.6324	63.9553	0.185489	10.2732	1.91338	0	7.73996	0.592927	0.649341	3.24388	7.92445	0.344321	3.17778
2000	958	28.5138	64.0168	0.181404	10.2391	1.91078	0	7.71195	0.595393	0.641329	3.22994	7.93686	0.34547	3.191
2000	957	28.3961	64.0782	0.177379	10.2049	1.90815	0	7.68392	0.597859	0.6334	3.21608	7.94921	0.346618	3.20422
2000	956	28.2794	64.1396	0.173415	10.1708	1.90551	0	7.65586	0.600327	0.625553	3.20229	7.96149	0.347764	3.21744
2000	955	28.1636	64.2008	0.169511	10.1367	1.90284	0	7.62776	0.602795	0.617788	3.18858	7.97371	0.348908	3.23067
2000	954	28.0487	64.2619	0.165666	10.1025	1.90015	0	7.59964	0.605264	0.610103	3.17494	7.98587	0.350049	3.2439
2000	953	27.9347	64.3229	0.16188	10.0684	1.89743	0	7.57149	0.607734	0.6025	3.16138	7.99797	0.351189	3.25714
2000	952	27.8216	64.3838	0.158153	10.0343	1.89469	0	7.54329	0.610204	0.594975	3.14789	8.01001	0.352327	3.27038
2000	951	27.7094	64.4446	0.154483	10.0002	1.89192	0	7.51507	0.612676	0.587529	3.13448	8.02199	0.353464	3.28363
2000	950	27.5981	64.5053	0.15087	9.9661	1.88912	0	7.4868	0.615148	0.580162	3.12114	8.0339	0.354598	3.29688
2000	949	27.4875	64.5659	0.147314	9.932	1.8863	0	7.4585	0.617621	0.572872	3.10787	8.04576	0.35573	3.31013
2000	948	27.3779	64.6264	0.143814	9.89791	1.88345	0	7.43016	0.620095	0.565659	3.09467	8.05756	0.356861	3.32339
2000	947	27.269	64.6869	0.14037	9.86382	1.88057	0	7.40177	0.62257	0.558522	3.08154	8.0693	0.35799	3.33665
2000	946	27.161	64.7472	0.136982	9.82974	1.87767	0	7.37334	0.625046	0.551461	3.06848	8.08099	0.359116	3.34992
2000	945	27.0538	64.8075	0.133647	9.79567	1.87474	0	7.34486	0.627523	0.544475	3.05549	8.09262	0.360241	3.3632
2000	944	26.9474	64.8677	0.130367	9.76161	1.87177	0	7.31634	0.63	0.537563	3.04257	8.10419	0.361364	3.37648
2000	943	26.8418	64.9279	0.127141	9.72756	1.86878	0	7.28777	0.632479	0.530725	3.02971	8.11571	0.362485	3.38976
2000	942	26.737	64.9879	0.123968	9.69352	1.86576	0	7.25915	0.634958	0.52396	3.01692	8.12717	0.363605	3.40305
2000	941	26.633	65.0479	0.120847	9.65949	1.8627	0	7.23048	0.637438	0.517267	3.0042	8.13858	0.364722	3.41634
2000	940	26.5297	65.1079	0.117779	9.62547	1.85962	0	7.20175	0.63992	0.510647	2.99154	8.14993	0.365838	3.42964
2000	939	26.4272	65.1677	0.114763	9.59146	1.8565	0	7.17297	0.642402	0.504098	2.97894	8.16123	0.366952	3.44294
2000	938	26.3254	65.2275	0.111798	9.55746	1.85335	0	7.14413	0.644886	0.497621	2.96641	8.17248	0.368064	3.45625
2000	937	26.2244	65.2873	0.108884	9.52347	1.85017	0	7.11524	0.64737	0.491214	2.95394	8.18367	0.369174	3.46957
2000	936	26.1241	65.347	0.106021	9.4895	1.84695	0	7.08628	0.649855	0.484876	2.94153	8.19482	0.370282	3.48289
2000	935	26.0245	65.4066	0.103207	9.45554	1.8437	0	7.05727	0.652342	0.478609	2.92919	8.20591	0.371389	3.49621
2000	934	25.9257	65.4662	0.100443	9.4216	1.84042	0	7.02819	0.654829	0.47241	2.9169	8.21695	0.372494	3.50955
2000	933	25.8275	65.5258	0.0977284	9.38767	1.83709	0	6.99904	0.657318	0.46628	2.90468	8.22794	0.373596	3.52288
2000	932	25.6312	65.6715	0.0987061	9.35758	1.81744	0	6.88942	0.647026	0.433881	2.89871	8.25993	0.375974	3.54987
2000	931	25.5317	65.7253	0.0987558	9.322	1.81553	0	6.866	0.645436	0.425769	2.89015	8.27022	0.377095	3.5637
2000	930	25.4278	65.7948	0.0969168	9.28588	1.81036	0	6.82806	0.644672	0.419116	2.88192	8.28176	0.378286	3.57826
2000	929	25.3247	65.864	0.09511	9.24977	1.80517	0	6.79018	0.643901	0.412543	2.87375	8.29326	0.379475	3.59283
2000	928	25.2224	65.9331	0.093335	9.21368	1.79996	0	6.75237	0.643122	0.406051	2.86562	8.3047	0.380662	3.6074
2000	927	25.121	66.002	0.0915912	9.17761	1.79473	0	6.71462	0.642337	0.399637	2.85755	8.31609	0.381846	3.62197
2000	926	25.0203	66.0708	0.0898783	9.14155	1.78947	0	6.67693	0.641544	0.393302	2.84953	8.32743	0.383029	3.63654
2000	925	24.9205	66.1394	0.0881957	9.10552	1.78419	0	6.63932	0.640744	0.387045	2.84156	8.33872	0.384209	3.65111
2000	924	24.8214	66.2078	0.086543	9.0695	1.77889	0	6.60177	0.639937	0.380866	2.83365	8.34996	0.385388	3.66568
2000	923	24.7231	66.2761	0.0849198	9.03349	1.77358	0	6.56429	0.639124	0.374763	2.82578	8.36115	0.386564	3.68026
2000	922	24.6256	66.3442	0.0833256	8.99751	1.76824	0	6.52689	0.638305	0.368735	2.81797	8.37229	0.387738	3.69483
2000	921	24.5289	66.4121	0.0817599	8.96154	1.76288	0	6.48956	0.637479	0.362783	2.81021	8.38338	0.388909	3.7094
2000	920	24.4329	66.4799	0.0802223	8.92559	1.7575	0	6.45231	0.636647	0.356906	2.8025	8.39442	0.390078	3.72397
2000	919	24.3376	66.5474	0.0787124	8.88966	1.7521	0	6.41513	0.635808	0.351102	2.79485	8.40541	0.391245	3.73854
2000	918	24.2432	66.6148	0.0772298	8.85375	1.74669	0	6.37804	0.634964	0.345372	2.78724	8.41635	0.39241	3.75311
2000	917	24.1494	66.6821	0.075774	8.81786	1.74125	0	6.34102	0.634115	0.339714	2.77968	8.42724	0.393573	3.76768
2000	916	24.0564	66.7492	0.0743447	8.78199	1.7358	0	6.30409	0.633259	0.334128	2.77217	8.43807	0.394733	3.78225
2000	915	23.9641	66.8161	0.0729413	8.74614	1.73033	0	6.26723	0.632399	0.328614	2.76472	8.44886	0.39589	3.79681
2000	914	23.8726	66.8828	0.0715636	8.71031	1.72484	0	6.23047	0.631532	0.32317	2.75731	8.4596	0.397045	3.81138
2000	913	23.7817	66.9493	0.070211	8.6745	1.71934	0	6.19379	0.630661	0.317796	2.74996	8.47029	0.398198	3.82594
2000	912	23.6916	67.0157	0.0688833	8.63871	1.71382	0	6.1572	0.629785	0.312491	2.74265	8.48093	0.399348	3.8405
2000	911	23.6021	67.0819	0.0675799	8.60294	1.70828	0	6.12069	0.628903	0.307255	2.73539	8.49152	0.400496	3.85505
2000	910	23.5134	67.1479	0.0663006	8.5672	1.70273	0	6.08428	0.628017	0.302087	2.72818	8.50206	0.401641	3.8696
2000	909	23.4253	67.2138	0.065045	8.53147	1.69716	0	6.04796	0.627126	0.296986	2.72102	8.51254	0.402784	3.88415
2000	908	23.3379	67.2794	0.0638126	8.49577	1.69158	0	6.01173	0.626231	0.291952	2.71391	8.52298	0.403924	3.89869
2000	907	23.2512	67.3449	0.0626031	8.46009	1.68598	0	5.97559	0.625331	0.286984	2.70685	8.53337	0.405062	3.91323
2000	906	23.1652	67.4102	0.0614161	8.42443	1.68037	0	5.93956	0.624426	0.282082	2.69984	8.54371	0.406197	3.92777
2000	905	23.0798	67.4753	0.0602513	8.3888	1.67474	0	5.90361	0.623518	0.277244	2.69287	8.554	0.40733	3.9423
2000	904	22.9951	67.5403	0.0591084	8.35319	1.6691	0	5.86777	0.622605	0.272471	2.68595	8.56423	0.408459	3.95682
2000	903	22.911	67.605	0.0579868	8.31761	1.66345	0	5.83203	0.621688	0.267761	2.67908	8.57442	0.409586	3.97134
2000	902	22.8276	67.6696	0.0568864	8.28205	1.65778	0	5.79639	0.620768	0.263114	2.67226	8.58456	0.410711	3.98585
2000	901	22.7448	67.734	0.0558067	8.24652	1.65211	0	5.76085	0.619843	0.25853	2.66549	8.59465	0.411832	4.00036
2000	900	22.6626	67.7982	0.0547474	8.21101	1.64642	0	5.72541	0.618915	0.254007	2.65876	8.60468	0.412951	4.01486
Title:	R-magma	-	mresidual	from	MZ-magma	at	T	=	1145	C
liquid_0	thermodynamic	data	and	composition:
Pressure	Temperature	mass	S	H	V	Cp	viscosity	SiO2	TiO2	Al2O3	Fe2O3	Cr2O3	FeO	MnO	MgO	CaO	Na2O	K2O	H2O	Mg#
2000	1400	99.9944	295.794	-1.22051e+06	40.0952	149.746	2.017	55.7259	0.154513	16.937	1.10632	0.0037064	6.19674	0.169778	5.74576	8.55448	4.38187	0.114054	0.909925	62.3
2000	1400	99.9944	295.794	-1.22051e+06	40.0952	149.746	2.017	55.7259	0.154513	16.937	1.10632	0.0037064	6.19674	0.169778	5.74576	8.55448	4.38187	0.114054	0.909925	62.3
2000	1399	99.9944	295.705	-1.22066e+06	40.0919	149.745	2.021	55.7259	0.154513	16.937	1.10645	0.0037064	6.19663	0.169778	5.74576	8.55448	4.38187	0.114054	0.909925	62.3
2000	1398	99.9944	295.615	-1.22081e+06	40.0886	149.745	2.025	55.7259	0.154513	16.937	1.10657	0.0037064	6.19651	0.169778	5.74576	8.55448	4.38187	0.114054	0.909924	62.3
2000	1397	99.9944	295.525	-1.22096e+06	40.0853	149.744	2.029	55.7259	0.154513	16.937	1.10671	0.0037064	6.19639	0.169778	5.74576	8.55448	4.38187	0.114054	0.909924	62.3
2000	1396	99.9945	295.436	-1.22111e+06	40.082	149.744	2.033	55.7258	0.154513	16.937	1.10684	0.0037064	6.19627	0.169778	5.74576	8.55448	4.38187	0.114054	0.909924	62.3
2000	1395	99.9945	295.346	-1.22126e+06	40.0787	149.744	2.036	55.7258	0.154513	16.937	1.10697	0.0037064	6.19615	0.169778	5.74575	8.55447	4.38187	0.114054	0.909924	62.3
2000	1394	99.9945	295.256	-1.22141e+06	40.0754	149.743	2.04	55.7258	0.154513	16.937	1.1071	0.00370639	6.19603	0.169778	5.74575	8.55447	4.38187	0.114054	0.909924	62.3
2000	1393	99.9945	295.166	-1.22156e+06	40.0722	149.743	2.044	55.7258	0.154513	16.937	1.10724	0.00370639	6.1959	0.169778	5.74575	8.55447	4.38187	0.114054	0.909924	62.3
2000	1392	99.9945	295.077	-1.22171e+06	40.0689	149.743	2.048	55.7258	0.154513	16.937	1.10738	0.00370639	6.19578	0.169778	5.74575	8.55447	4.38187	0.114054	0.909924	62.3
2000	1391	99.9945	294.987	-1.22186e+06	40.0656	149.742	2.052	55.7258	0.154513	16.937	1.10752	0.00370639	6.19565	0.169778	5.74575	8.55447	4.38187	0.114054	0.909924	62.3
2000	1390	99.9945	294.897	-1.22201e+06	40.0623	149.742	2.056	55.7258	0.154513	16.937	1.10766	0.00370639	6.19553	0.169778	5.74575	8.55447	4.38186	0.114054	0.909923	62.3
2000	1389	99.9945	294.807	-1.22216e+06	40.059	149.742	2.06	55.7258	0.154513	16.937	1.1078	0.00370639	6.1954	0.169778	5.74575	8.55447	4.38186	0.114054	0.909923	62.3
2000	1388	99.9946	294.717	-1.22231e+06	40.0557	149.741	2.064	55.7258	0.154513	16.9369	1.10794	0.00370639	6.19527	0.169778	5.74575	8.55447	4.38186	0.114054	0.909923	62.3
2000	1387	99.9946	294.626	-1.22246e+06	40.0525	149.741	2.067	55.7258	0.154513	16.9369	1.10808	0.00370639	6.19514	0.169778	5.74575	8.55446	4.38186	0.114054	0.909923	62.3
2000	1386	99.9946	294.536	-1.22261e+06	40.0492	149.741	2.071	55.7258	0.154513	16.9369	1.10823	0.00370639	6.19501	0.169778	5.74575	8.55446	4.38186	0.114054	0.909923	62.3
2000	1385	99.9946	294.446	-1.22276e+06	40.0459	149.74	2.075	55.7258	0.154513	16.9369	1.10838	0.00370639	6.19488	0.169778	5.74575	8.55446	4.38186	0.114054	0.909923	62.3
2000	1384	99.9946	294.356	-1.22291e+06	40.0426	149.74	2.079	55.7258	0.154513	16.9369	1.10852	0.00370639	6.19474	0.169778	5.74575	8.55446	4.38186	0.114054	0.909923	62.3
2000	1383	99.9946	294.265	-1.22306e+06	40.0393	149.739	2.083	55.7257	0.154513	16.9369	1.10867	0.00370639	6.19461	0.169778	5.74574	8.55446	4.38186	0.114054	0.909923	62.3
2000	1382	99.9946	294.175	-1.22321e+06	40.036	149.739	2.087	55.7257	0.154513	16.9369	1.10882	0.00370639	6.19447	0.169778	5.74574	8.55446	4.38186	0.114054	0.909922	62.3
2000	1381	99.9947	294.085	-1.22336e+06	40.0328	149.739	2.091	55.7257	0.154513	16.9369	1.10898	0.00370639	6.19433	0.169778	5.74574	8.55446	4.38186	0.114054	0.909922	62.3
2000	1380	99.9947	293.994	-1.22351e+06	40.0295	149.738	2.095	55.7257	0.154513	16.9369	1.10913	0.00370639	6.19419	0.169778	5.74574	8.55446	4.38186	0.114054	0.909922	62.3
2000	1379	99.9947	293.903	-1.22366e+06	40.0262	149.738	2.099	55.7257	0.154513	16.9369	1.10928	0.00370639	6.19405	0.169778	5.74574	8.55445	4.38186	0.114054	0.909922	62.3
2000	1378	99.9947	293.813	-1.22381e+06	40.0229	149.738	2.103	55.7257	0.154513	16.9369	1.10944	0.00370639	6.19391	0.169778	5.74574	8.55445	4.38186	0.114054	0.909922	62.3
2000	1377	99.9947	293.722	-1.22396e+06	40.0196	149.737	2.107	55.7257	0.154513	16.9369	1.1096	0.00370639	6.19377	0.169778	5.74574	8.55445	4.38186	0.114054	0.909922	62.3
2000	1376	99.9947	293.631	-1.22411e+06	40.0164	149.737	2.11	55.7257	0.154513	16.9369	1.10976	0.00370639	6.19362	0.169778	5.74574	8.55445	4.38186	0.114054	0.909922	62.3
2000	1375	99.9948	293.541	-1.22426e+06	40.0131	149.737	2.114	55.7257	0.154513	16.9369	1.10992	0.00370638	6.19348	0.169778	5.74574	8.55445	4.38186	0.114053	0.909921	62.3
2000	1374	99.9948	293.45	-1.22441e+06	40.0098	149.736	2.118	55.7257	0.154513	16.9369	1.11008	0.00370638	6.19333	0.169778	5.74574	8.55445	4.38185	0.114053	0.909921	62.3
2000	1373	99.9948	293.359	-1.22456e+06	40.0065	149.736	2.122	55.7257	0.154513	16.9369	1.11024	0.00370638	6.19318	0.169778	5.74574	8.55445	4.38185	0.114053	0.909921	62.3
2000	1372	99.9948	293.268	-1.22471e+06	40.0032	149.736	2.126	55.7257	0.154513	16.9369	1.11041	0.00370638	6.19303	0.169778	5.74573	8.55444	4.38185	0.114053	0.909921	62.3
2000	1371	99.9948	293.177	-1.22486e+06	40	149.735	2.13	55.7256	0.154513	16.9369	1.11057	0.00370638	6.19288	0.169778	5.74573	8.55444	4.38185	0.114053	0.909921	62.3
2000	1370	99.9948	293.086	-1.22501e+06	39.9967	149.735	2.134	55.7256	0.154513	16.9369	1.11074	0.00370638	6.19273	0.169778	5.74573	8.55444	4.38185	0.114053	0.909921	62.3
2000	1369	99.9949	292.995	-1.22516e+06	39.9934	149.735	2.138	55.7256	0.154513	16.9369	1.11091	0.00370638	6.19258	0.169778	5.74573	8.55444	4.38185	0.114053	0.90992	62.3
2000	1368	99.9949	292.904	-1.22531e+06	39.9901	149.734	2.142	55.7256	0.154513	16.9369	1.11108	0.00370638	6.19242	0.169778	5.74573	8.55444	4.38185	0.114053	0.90992	62.3
2000	1367	99.9949	292.812	-1.22546e+06	39.9868	149.734	2.146	55.7256	0.154513	16.9369	1.11125	0.00370638	6.19227	0.169778	5.74573	8.55444	4.38185	0.114053	0.90992	62.3
2000	1366	99.9949	292.721	-1.22561e+06	39.9836	149.734	2.15	55.7256	0.154513	16.9369	1.11142	0.00370638	6.19211	0.169778	5.74573	8.55444	4.38185	0.114053	0.90992	62.3
2000	1365	99.9949	292.63	-1.22576e+06	39.9803	149.733	2.154	55.7256	0.154513	16.9369	1.1116	0.00370638	6.19195	0.169778	5.74573	8.55443	4.38185	0.114053	0.90992	62.3
2000	1364	99.9949	292.538	-1.22591e+06	39.977	149.733	2.158	55.7256	0.154513	16.9369	1.11177	0.00370638	6.19179	0.169777	5.74573	8.55443	4.38185	0.114053	0.90992	62.3
2000	1363	99.995	292.447	-1.22606e+06	39.9737	149.733	2.162	55.7256	0.154513	16.9369	1.11195	0.00370638	6.19163	0.169777	5.74573	8.55443	4.38185	0.114053	0.90992	62.3
2000	1362	99.995	292.355	-1.22621e+06	39.9704	149.732	2.166	55.7256	0.154513	16.9369	1.11213	0.00370638	6.19147	0.169777	5.74572	8.55443	4.38185	0.114053	0.909919	62.3
2000	1361	99.995	292.264	-1.22636e+06	39.9672	149.732	2.17	55.7255	0.154513	16.9369	1.11231	0.00370638	6.19131	0.169777	5.74572	8.55443	4.38184	0.114053	0.909919	62.3
2000	1360	99.995	292.172	-1.22651e+06	39.9639	149.732	2.174	55.7255	0.154513	16.9369	1.11249	0.00370637	6.19114	0.169777	5.74572	8.55443	4.38184	0.114053	0.909919	62.3
2000	1359	99.995	292.081	-1.22666e+06	39.9606	149.731	2.178	55.7255	0.154512	16.9369	1.11267	0.00370637	6.19098	0.169777	5.74572	8.55443	4.38184	0.114053	0.909919	62.3
2000	1358	99.9951	291.989	-1.22681e+06	39.9573	149.731	2.182	55.7255	0.154512	16.9369	1.11286	0.00370637	6.19081	0.169777	5.74572	8.55442	4.38184	0.114053	0.909919	62.3
2000	1357	99.9951	291.897	-1.22696e+06	39.9541	149.731	2.186	55.7255	0.154512	16.9369	1.11305	0.00370637	6.19064	0.169777	5.74572	8.55442	4.38184	0.114053	0.909919	62.3
2000	1356	99.9951	291.805	-1.22711e+06	39.9508	149.73	2.19	55.7255	0.154512	16.9369	1.11323	0.00370637	6.19047	0.169777	5.74572	8.55442	4.38184	0.114053	0.909918	62.3
2000	1355	99.9951	291.713	-1.22726e+06	39.9475	149.73	2.194	55.7255	0.154512	16.9369	1.11342	0.00370637	6.1903	0.169777	5.74572	8.55442	4.38184	0.114053	0.909918	62.3
2000	1354	99.9951	291.621	-1.22741e+06	39.9442	149.73	2.198	55.7255	0.154512	16.9369	1.11361	0.00370637	6.19013	0.169777	5.74572	8.55442	4.38184	0.114053	0.909918	62.3
2000	1353	99.9951	291.529	-1.22756e+06	39.941	149.729	2.202	55.7255	0.154512	16.9368	1.1138	0.00370637	6.18995	0.169777	5.74572	8.55442	4.38184	0.114053	0.909918	62.3
2000	1352	99.9952	291.437	-1.22771e+06	39.9377	149.729	2.206	55.7254	0.154512	16.9368	1.114	0.00370637	6.18978	0.169777	5.74571	8.55441	4.38184	0.114053	0.909918	62.3
2000	1351	99.9952	291.345	-1.22786e+06	39.9344	149.729	2.21	55.7254	0.154512	16.9368	1.11419	0.00370637	6.1896	0.169777	5.74571	8.55441	4.38184	0.114053	0.909917	62.3
2000	1350	99.9952	291.253	-1.22801e+06	39.9311	149.728	2.215	55.7254	0.154512	16.9368	1.11439	0.00370637	6.18942	0.169777	5.74571	8.55441	4.38184	0.114053	0.909917	62.3
2000	1349	99.9952	291.161	-1.22816e+06	39.9279	149.728	2.219	55.7254	0.154512	16.9368	1.11459	0.00370637	6.18924	0.169777	5.74571	8.55441	4.38183	0.114053	0.909917	62.3
2000	1348	99.9952	291.069	-1.22831e+06	39.9246	149.728	2.223	55.7254	0.154512	16.9368	1.11479	0.00370637	6.18906	0.169777	5.74571	8.55441	4.38183	0.114053	0.909917	62.3
2000	1347	99.9953	290.976	-1.22846e+06	39.9213	149.727	2.227	55.7254	0.154512	16.9368	1.11499	0.00370637	6.18888	0.169777	5.74571	8.55441	4.38183	0.114053	0.909917	62.3
2000	1346	99.9953	290.884	-1.22861e+06	39.9181	149.727	2.231	55.7254	0.154512	16.9368	1.11519	0.00370636	6.18869	0.169777	5.74571	8.5544	4.38183	0.114053	0.909917	62.3
2000	1345	99.9953	290.791	-1.22876e+06	39.9148	149.727	2.235	55.7254	0.154512	16.9368	1.11539	0.00370636	6.18851	0.169777	5.74571	8.5544	4.38183	0.114053	0.909916	62.3
2000	1344	99.9953	290.699	-1.22891e+06	39.9115	149.726	2.239	55.7254	0.154512	16.9368	1.1156	0.00370636	6.18832	0.169777	5.7457	8.5544	4.38183	0.114053	0.909916	62.3
2000	1343	99.9954	290.606	-1.22906e+06	39.9082	149.726	2.243	55.7253	0.154512	16.9368	1.11581	0.00370636	6.18814	0.169777	5.7457	8.5544	4.38183	0.114053	0.909916	62.3
2000	1342	99.9954	290.514	-1.22921e+06	39.905	149.726	2.247	55.7253	0.154512	16.9368	1.11601	0.00370636	6.18795	0.169777	5.7457	8.5544	4.38183	0.114053	0.909916	62.3
2000	1341	99.9954	290.421	-1.22936e+06	39.9017	149.725	2.251	55.7253	0.154512	16.9368	1.11622	0.00370636	6.18776	0.169777	5.7457	8.55439	4.38183	0.114053	0.909916	62.3
2000	1340	99.9954	290.328	-1.22951e+06	39.8984	149.725	2.255	55.7253	0.154512	16.9368	1.11644	0.00370636	6.18756	0.169777	5.7457	8.55439	4.38183	0.114053	0.909915	62.3
2000	1339	99.9954	290.235	-1.22966e+06	39.8952	149.725	2.26	55.7253	0.154512	16.9368	1.11665	0.00370636	6.18737	0.169777	5.7457	8.55439	4.38183	0.114053	0.909915	62.3
2000	1338	99.9955	290.143	-1.22981e+06	39.8919	149.724	2.264	55.7253	0.154512	16.9368	1.11686	0.00370636	6.18718	0.169777	5.7457	8.55439	4.38182	0.114053	0.909915	62.3
2000	1337	99.9955	290.05	-1.22996e+06	39.8886	149.724	2.268	55.7253	0.154512	16.9368	1.11708	0.00370636	6.18698	0.169777	5.7457	8.55439	4.38182	0.114053	0.909915	62.3
2000	1336	99.9955	289.957	-1.23011e+06	39.8854	149.724	2.272	55.7253	0.154512	16.9368	1.1173	0.00370636	6.18678	0.169777	5.7457	8.55439	4.38182	0.114053	0.909915	62.3
2000	1335	99.9955	289.864	-1.23026e+06	39.8821	149.723	2.276	55.7253	0.154512	16.9368	1.11752	0.00370636	6.18658	0.169776	5.74569	8.55438	4.38182	0.114053	0.909914	62.3
2000	1334	99.9955	289.771	-1.23041e+06	39.8788	149.723	2.28	55.7252	0.154512	16.9368	1.11774	0.00370636	6.18638	0.169776	5.74569	8.55438	4.38182	0.114053	0.909914	62.3
2000	1333	99.9956	289.677	-1.23056e+06	39.8755	149.723	2.284	55.7252	0.154512	16.9368	1.11796	0.00370635	6.18618	0.169776	5.74569	8.55438	4.38182	0.114053	0.909914	62.3
2000	1332	99.9956	289.584	-1.23071e+06	39.8723	149.723	2.289	55.7252	0.154512	16.9368	1.11818	0.00370635	6.18598	0.169776	5.74569	8.55438	4.38182	0.114053	0.909914	62.3
2000	1331	99.9956	289.491	-1.23086e+06	39.869	149.722	2.293	55.7252	0.154512	16.9368	1.11841	0.00370635	6.18577	0.169776	5.74569	8.55438	4.38182	0.114053	0.909914	62.3
2000	1330	99.9956	289.398	-1.23101e+06	39.8657	149.722	2.297	55.7252	0.154512	16.9368	1.11864	0.00370635	6.18557	0.169776	5.74569	8.55437	4.38182	0.114052	0.909913	62.3
2000	1329	99.9957	289.304	-1.23116e+06	39.8625	149.722	2.301	55.7252	0.154512	16.9368	1.11887	0.00370635	6.18536	0.169776	5.74569	8.55437	4.38182	0.114052	0.909913	62.3
2000	1328	99.9957	289.211	-1.23131e+06	39.8592	149.721	2.305	55.7252	0.154511	16.9368	1.1191	0.00370635	6.18515	0.169776	5.74568	8.55437	4.38181	0.114052	0.909913	62.3
2000	1327	99.9957	289.117	-1.23146e+06	39.8559	149.721	2.309	55.7252	0.154511	16.9368	1.11933	0.00370635	6.18494	0.169776	5.74568	8.55437	4.38181	0.114052	0.909913	62.3
2000	1326	99.9957	289.024	-1.23161e+06	39.8527	149.721	2.314	55.7251	0.154511	16.9368	1.11956	0.00370635	6.18473	0.169776	5.74568	8.55437	4.38181	0.114052	0.909913	62.3
2000	1325	99.9958	288.93	-1.23176e+06	39.8494	149.72	2.318	55.7251	0.154511	16.9367	1.1198	0.00370635	6.18452	0.169776	5.74568	8.55436	4.38181	0.114052	0.909912	62.3
2000	1324	99.9958	288.837	-1.23191e+06	39.8461	149.72	2.322	55.7251	0.154511	16.9367	1.12003	0.00370635	6.1843	0.169776	5.74568	8.55436	4.38181	0.114052	0.909912	62.3
2000	1323	99.9958	288.743	-1.23206e+06	39.8429	149.72	2.326	55.7251	0.154511	16.9367	1.12027	0.00370635	6.18408	0.169776	5.74568	8.55436	4.38181	0.114052	0.909912	62.3
2000	1322	99.9958	288.649	-1.23221e+06	39.8396	149.719	2.33	55.7251	0.154511	16.9367	1.12051	0.00370635	6.18387	0.169776	5.74568	8.55436	4.38181	0.114052	0.909912	62.3
2000	1321	99.9958	288.555	-1.23236e+06	39.8363	149.719	2.335	55.7251	0.154511	16.9367	1.12075	0.00370634	6.18365	0.169776	5.74568	8.55436	4.38181	0.114052	0.909911	62.4
2000	1320	99.9959	288.461	-1.23251e+06	39.8331	149.719	2.339	55.7251	0.154511	16.9367	1.121	0.00370634	6.18343	0.169776	5.74567	8.55435	4.38181	0.114052	0.909911	62.4
2000	1319	99.9959	288.367	-1.23266e+06	39.8298	149.719	2.343	55.725	0.154511	16.9367	1.12124	0.00370634	6.18321	0.169776	5.74567	8.55435	4.38181	0.114052	0.909911	62.4
2000	1318	99.9959	288.273	-1.23281e+06	39.8266	149.718	2.347	55.725	0.154511	16.9367	1.12149	0.00370634	6.18298	0.169776	5.74567	8.55435	4.3818	0.114052	0.909911	62.4
2000	1317	99.9959	288.179	-1.23296e+06	39.8233	149.718	2.352	55.725	0.154511	16.9367	1.12174	0.00370634	6.18276	0.169776	5.74567	8.55435	4.3818	0.114052	0.909911	62.4
2000	1316	99.996	288.085	-1.23311e+06	39.82	149.718	2.356	55.725	0.154511	16.9367	1.12199	0.00370634	6.18253	0.169776	5.74567	8.55435	4.3818	0.114052	0.90991	62.4
2000	1315	99.996	287.991	-1.23326e+06	39.8168	149.717	2.36	55.725	0.154511	16.9367	1.12224	0.00370634	6.1823	0.169776	5.74567	8.55434	4.3818	0.114052	0.90991	62.4
2000	1314	99.996	287.897	-1.23341e+06	39.8135	149.717	2.364	55.725	0.154511	16.9367	1.12249	0.00370634	6.18207	0.169776	5.74567	8.55434	4.3818	0.114052	0.90991	62.4
2000	1313	99.996	287.803	-1.23356e+06	39.8102	149.717	2.369	55.725	0.154511	16.9367	1.12274	0.00370634	6.18184	0.169776	5.74566	8.55434	4.3818	0.114052	0.90991	62.4
2000	1312	99.9961	287.708	-1.23371e+06	39.807	149.717	2.373	55.7249	0.154511	16.9367	1.123	0.00370634	6.18161	0.169776	5.74566	8.55434	4.3818	0.114052	0.909909	62.4
2000	1311	99.9961	287.614	-1.23386e+06	39.8037	149.716	2.377	55.7249	0.154511	16.9367	1.12326	0.00370633	6.18138	0.169776	5.74566	8.55433	4.3818	0.114052	0.909909	62.4
2000	1310	99.9961	287.519	-1.23401e+06	39.8005	149.716	2.381	55.7249	0.154511	16.9367	1.12352	0.00370633	6.18114	0.169775	5.74566	8.55433	4.3818	0.114052	0.909909	62.4
2000	1309	99.9962	287.425	-1.23416e+06	39.7972	149.716	2.386	55.7249	0.154511	16.9367	1.12378	0.00370633	6.1809	0.169775	5.74566	8.55433	4.38179	0.114052	0.909909	62.4
2000	1308	99.9962	287.33	-1.23431e+06	39.7939	149.715	2.39	55.7249	0.154511	16.9367	1.12404	0.00370633	6.18066	0.169775	5.74566	8.55433	4.38179	0.114052	0.909908	62.4
2000	1307	99.9962	287.235	-1.23446e+06	39.7907	149.715	2.394	55.7249	0.154511	16.9367	1.12431	0.00370633	6.18042	0.169775	5.74565	8.55433	4.38179	0.114052	0.909908	62.4
2000	1306	99.9962	287.141	-1.23461e+06	39.7874	149.715	2.398	55.7249	0.154511	16.9367	1.12457	0.00370633	6.18018	0.169775	5.74565	8.55432	4.38179	0.114052	0.909908	62.4
2000	1305	99.9963	287.046	-1.23476e+06	39.7842	149.715	2.403	55.7248	0.154511	16.9367	1.12484	0.00370633	6.17994	0.169775	5.74565	8.55432	4.38179	0.114052	0.909908	62.4
2000	1304	99.9963	286.951	-1.23491e+06	39.7809	149.714	2.407	55.7248	0.154511	16.9367	1.12511	0.00370633	6.1797	0.169775	5.74565	8.55432	4.38179	0.114052	0.909908	62.4
2000	1303	99.9963	286.856	-1.23506e+06	39.7776	149.714	2.411	55.7248	0.154511	16.9367	1.12538	0.00370633	6.17945	0.169775	5.74565	8.55432	4.38179	0.114052	0.909907	62.4
2000	1302	99.9963	286.761	-1.23521e+06	39.7744	149.714	2.416	55.7248	0.15451	16.9366	1.12566	0.00370633	6.1792	0.169775	5.74565	8.55431	4.38179	0.114052	0.909907	62.4
2000	1301	99.9964	286.666	-1.23536e+06	39.7711	149.713	2.42	55.7248	0.15451	16.9366	1.12593	0.00370632	6.17895	0.169775	5.74565	8.55431	4.38178	0.114052	0.909907	62.4
2000	1300	99.9964	286.571	-1.23551e+06	39.7679	149.713	2.424	55.7248	0.15451	16.9366	1.12621	0.00370632	6.1787	0.169775	5.74564	8.55431	4.38178	0.114052	0.909907	62.4
2000	1299	99.9964	286.476	-1.23566e+06	39.7646	149.713	2.429	55.7248	0.15451	16.9366	1.12649	0.00370632	6.17845	0.169775	5.74564	8.55431	4.38178	0.114052	0.909906	62.4
2000	1298	99.9964	286.381	-1.23581e+06	39.7613	149.713	2.433	55.7247	0.15451	16.9366	1.12677	0.00370632	6.17819	0.169775	5.74564	8.5543	4.38178	0.114052	0.909906	62.4
2000	1297	99.9965	286.286	-1.23596e+06	39.7581	149.712	2.437	55.7247	0.15451	16.9366	1.12705	0.00370632	6.17794	0.169775	5.74564	8.5543	4.38178	0.114052	0.909906	62.4
2000	1296	99.9965	286.19	-1.23611e+06	39.7548	149.712	2.442	55.7247	0.15451	16.9366	1.12733	0.00370632	6.17768	0.169775	5.74564	8.5543	4.38178	0.114052	0.909905	62.4
2000	1295	99.9965	286.095	-1.23626e+06	39.7516	149.712	2.446	55.7247	0.15451	16.9366	1.12762	0.00370632	6.17742	0.169775	5.74564	8.5543	4.38178	0.114051	0.909905	62.4
2000	1294	99.9966	285.999	-1.23641e+06	39.7483	149.712	2.45	55.7247	0.15451	16.9366	1.1279	0.00370632	6.17716	0.169775	5.74563	8.55429	4.38178	0.114051	0.909905	62.4
2000	1293	99.9966	285.904	-1.23656e+06	39.7451	149.711	2.455	55.7247	0.15451	16.9366	1.12819	0.00370632	6.1769	0.169775	5.74563	8.55429	4.38177	0.114051	0.909905	62.4
2000	1292	99.9966	285.808	-1.23671e+06	39.7418	149.711	2.459	55.7246	0.15451	16.9366	1.12848	0.00370632	6.17664	0.169775	5.74563	8.55429	4.38177	0.114051	0.909904	62.4
2000	1291	99.9967	285.713	-1.23686e+06	39.7386	149.711	2.464	55.7246	0.15451	16.9366	1.12877	0.00370631	6.17637	0.169775	5.74563	8.55429	4.38177	0.114051	0.909904	62.4
2000	1290	99.9967	285.617	-1.23701e+06	39.7353	149.71	2.468	55.7246	0.15451	16.9366	1.12907	0.00370631	6.17611	0.169775	5.74563	8.55428	4.38177	0.114051	0.909904	62.4
2000	1289	99.9967	285.521	-1.23716e+06	39.732	149.71	2.472	55.7246	0.15451	16.9366	1.12936	0.00370631	6.17584	0.169774	5.74563	8.55428	4.38177	0.114051	0.909904	62.4
2000	1288	99.9967	285.426	-1.23731e+06	39.7288	149.71	2.477	55.7246	0.15451	16.9366	1.12966	0.00370631	6.17557	0.169774	5.74562	8.55428	4.38177	0.114051	0.909903	62.4
2000	1287	99.9968	285.33	-1.23746e+06	39.7255	149.71	2.481	55.7246	0.15451	16.9366	1.12996	0.00370631	6.1753	0.169774	5.74562	8.55428	4.38177	0.114051	0.909903	62.4
2000	1286	99.9968	285.234	-1.23761e+06	39.7223	149.709	2.486	55.7245	0.15451	16.9366	1.13026	0.00370631	6.17502	0.169774	5.74562	8.55427	4.38177	0.114051	0.909903	62.4
2000	1285	99.9968	285.138	-1.23776e+06	39.719	149.709	2.49	55.7245	0.15451	16.9366	1.13057	0.00370631	6.17475	0.169774	5.74562	8.55427	4.38176	0.114051	0.909903	62.4
2000	1284	99.9969	285.042	-1.23791e+06	39.7158	149.709	2.494	55.7245	0.15451	16.9366	1.13087	0.00370631	6.17447	0.169774	5.74562	8.55427	4.38176	0.114051	0.909902	62.4
2000	1283	99.9969	284.946	-1.23806e+06	39.7125	149.709	2.499	55.7245	0.15451	16.9366	1.13118	0.00370631	6.17419	0.169774	5.74562	8.55427	4.38176	0.114051	0.909902	62.4
2000	1282	99.9969	284.849	-1.23821e+06	39.7093	149.708	2.503	55.7245	0.15451	16.9365	1.13149	0.0037063	6.17391	0.169774	5.74561	8.55426	4.38176	0.114051	0.909902	62.4
2000	1281	99.997	284.753	-1.23836e+06	39.706	149.708	2.508	55.7245	0.15451	16.9365	1.1318	0.0037063	6.17363	0.169774	5.74561	8.55426	4.38176	0.114051	0.909901	62.4
2000	1280	99.997	284.657	-1.23851e+06	39.7028	149.708	2.512	55.7244	0.154509	16.9365	1.13211	0.0037063	6.17335	0.169774	5.74561	8.55426	4.38176	0.114051	0.909901	62.4
2000	1279	99.997	284.561	-1.23866e+06	39.6995	149.708	2.517	55.7244	0.154509	16.9365	1.13242	0.0037063	6.17306	0.169774	5.74561	8.55426	4.38176	0.114051	0.909901	62.4
2000	1278	99.997	284.464	-1.23881e+06	39.6963	149.707	2.521	55.7244	0.154509	16.9365	1.13274	0.0037063	6.17278	0.169774	5.74561	8.55425	4.38175	0.114051	0.909901	62.4
2000	1277	99.9971	284.368	-1.23896e+06	39.693	149.707	2.525	55.7244	0.154509	16.9365	1.13305	0.0037063	6.17249	0.169774	5.7456	8.55425	4.38175	0.114051	0.9099	62.4
2000	1276	99.9971	284.271	-1.23911e+06	39.6898	149.707	2.53	55.7244	0.154509	16.9365	1.13337	0.0037063	6.1722	0.169774	5.7456	8.55425	4.38175	0.114051	0.9099	62.4
2000	1275	99.9971	284.174	-1.23926e+06	39.6865	149.707	2.534	55.7243	0.154509	16.9365	1.1337	0.0037063	6.17191	0.169774	5.7456	8.55424	4.38175	0.114051	0.9099	62.4
2000	1274	99.9972	284.078	-1.23942e+06	39.6833	149.706	2.539	55.7243	0.154509	16.9365	1.13402	0.00370629	6.17162	0.169774	5.7456	8.55424	4.38175	0.114051	0.909899	62.4
2000	1273	99.9972	283.981	-1.23957e+06	39.68	149.706	2.543	55.7243	0.154509	16.9365	1.13434	0.00370629	6.17132	0.169774	5.7456	8.55424	4.38175	0.114051	0.909899	62.4
2000	1272	99.9972	283.884	-1.23972e+06	39.6768	149.706	2.548	55.7243	0.154509	16.9365	1.13467	0.00370629	6.17102	0.169774	5.74559	8.55424	4.38175	0.114051	0.909899	62.4
2000	1271	99.9973	283.787	-1.23987e+06	39.6735	149.706	2.552	55.7243	0.154509	16.9365	1.135	0.00370629	6.17073	0.169774	5.74559	8.55423	4.38174	0.114051	0.909898	62.4
2000	1270	99.9973	283.691	-1.24002e+06	39.6703	149.705	2.557	55.7243	0.154509	16.9365	1.13533	0.00370629	6.17043	0.169773	5.74559	8.55423	4.38174	0.114051	0.909898	62.4
2000	1269	99.9973	283.594	-1.24017e+06	39.667	149.705	2.561	55.7242	0.154509	16.9365	1.13566	0.00370629	6.17013	0.169773	5.74559	8.55423	4.38174	0.114051	0.909898	62.4
2000	1268	99.9974	283.497	-1.24032e+06	39.6638	149.705	2.566	55.7242	0.154509	16.9365	1.136	0.00370629	6.16982	0.169773	5.74559	8.55422	4.38174	0.114051	0.909898	62.4
2000	1267	99.9974	283.399	-1.24047e+06	39.6605	149.705	2.57	55.7242	0.154509	16.9365	1.13633	0.00370629	6.16952	0.169773	5.74559	8.55422	4.38174	0.11405	0.909897	62.4
2000	1266	99.9974	283.302	-1.24062e+06	39.6573	149.704	2.575	55.7242	0.154509	16.9365	1.13667	0.00370629	6.16921	0.169773	5.74558	8.55422	4.38174	0.11405	0.909897	62.4
2000	1265	99.9975	283.205	-1.24077e+06	39.6541	149.704	2.579	55.7242	0.154509	16.9365	1.13701	0.00370628	6.1689	0.169773	5.74558	8.55422	4.38174	0.11405	0.909897	62.4
2000	1264	99.9975	283.108	-1.24092e+06	39.6508	149.704	2.584	55.7241	0.154509	16.9364	1.13735	0.00370628	6.16859	0.169773	5.74558	8.55421	4.38173	0.11405	0.909896	62.4
2000	1263	99.9975	283.01	-1.24107e+06	39.6476	149.704	2.588	55.7241	0.154509	16.9364	1.1377	0.00370628	6.16828	0.169773	5.74558	8.55421	4.38173	0.11405	0.909896	62.4
2000	1262	99.9976	282.913	-1.24122e+06	39.6443	149.703	2.593	55.7241	0.154509	16.9364	1.13804	0.00370628	6.16797	0.169773	5.74558	8.55421	4.38173	0.11405	0.909896	62.4
2000	1261	99.9976	282.816	-1.24137e+06	39.6411	149.703	2.598	55.7241	0.154508	16.9364	1.13839	0.00370628	6.16765	0.169773	5.74557	8.5542	4.38173	0.11405	0.909895	62.4
2000	1260	99.9977	282.718	-1.24152e+06	39.6378	149.703	2.602	55.7241	0.154508	16.9364	1.13874	0.00370628	6.16733	0.169773	5.74557	8.5542	4.38173	0.11405	0.909895	62.4
2000	1259	99.9977	282.62	-1.24167e+06	39.6346	149.703	2.607	55.724	0.154508	16.9364	1.13909	0.00370628	6.16701	0.169773	5.74557	8.5542	4.38173	0.11405	0.909895	62.4
2000	1258	99.9977	282.523	-1.24182e+06	39.6313	149.702	2.611	55.724	0.154508	16.9364	1.13945	0.00370627	6.16669	0.169773	5.74557	8.5542	4.38173	0.11405	0.909894	62.4
2000	1257	99.9978	282.425	-1.24197e+06	39.6281	149.702	2.616	55.724	0.154508	16.9364	1.1398	0.00370627	6.16637	0.169773	5.74557	8.55419	4.38172	0.11405	0.909894	62.4
2000	1256	99.9978	282.327	-1.24212e+06	39.6249	149.702	2.62	55.724	0.154508	16.9364	1.14016	0.00370627	6.16605	0.169773	5.74556	8.55419	4.38172	0.11405	0.909894	62.4
2000	1255	99.9978	282.229	-1.24227e+06	39.6216	149.702	2.625	55.724	0.154508	16.9364	1.14052	0.00370627	6.16572	0.169773	5.74556	8.55419	4.38172	0.11405	0.909893	62.4
2000	1254	99.9979	282.131	-1.24242e+06	39.6184	149.702	2.63	55.7239	0.154508	16.9364	1.14088	0.00370627	6.16539	0.169773	5.74556	8.55418	4.38172	0.11405	0.909893	62.4
2000	1253	99.9979	282.033	-1.24257e+06	39.6151	149.701	2.634	55.7239	0.154508	16.9364	1.14124	0.00370627	6.16506	0.169772	5.74556	8.55418	4.38172	0.11405	0.909893	62.4
2000	1252	99.9979	281.935	-1.24272e+06	39.6119	149.701	2.639	55.7239	0.154508	16.9364	1.14161	0.00370627	6.16473	0.169772	5.74555	8.55418	4.38172	0.11405	0.909892	62.4
2000	1251	99.998	281.837	-1.24287e+06	39.6087	149.701	2.643	55.7239	0.154508	16.9364	1.14198	0.00370627	6.1644	0.169772	5.74555	8.55417	4.38171	0.11405	0.909892	62.4
2000	1250	99.998	281.739	-1.24302e+06	39.6054	149.701	2.648	55.7239	0.154508	16.9364	1.14234	0.00370626	6.16406	0.169772	5.74555	8.55417	4.38171	0.11405	0.909892	62.4
2000	1249	99.9981	281.641	-1.24317e+06	39.6022	149.7	2.653	55.7238	0.154508	16.9364	1.14272	0.00370626	6.16373	0.169772	5.74555	8.55417	4.38171	0.11405	0.909891	62.4
2000	1248	99.9981	281.543	-1.24332e+06	39.5989	149.7	2.657	55.7238	0.154508	16.9364	1.14309	0.00370626	6.16339	0.169772	5.74555	8.55416	4.38171	0.11405	0.909891	62.4
2000	1247	99.9981	281.444	-1.24347e+06	39.5957	149.7	2.662	55.7238	0.154508	16.9363	1.14347	0.00370626	6.16305	0.169772	5.74554	8.55416	4.38171	0.11405	0.909891	62.4
2000	1246	99.9982	281.346	-1.24362e+06	39.5925	149.7	2.666	55.7238	0.154508	16.9363	1.14384	0.00370626	6.16271	0.169772	5.74554	8.55416	4.38171	0.11405	0.90989	62.4
2000	1245	99.9982	281.247	-1.24377e+06	39.5892	149.7	2.671	55.7238	0.154508	16.9363	1.14422	0.00370626	6.16236	0.169772	5.74554	8.55415	4.3817	0.11405	0.90989	62.4
2000	1244	99.9982	281.149	-1.24392e+06	39.586	149.699	2.676	55.7237	0.154508	16.9363	1.1446	0.00370626	6.16202	0.169772	5.74554	8.55415	4.3817	0.11405	0.90989	62.4
2000	1243	99.9983	281.05	-1.24407e+06	39.5827	149.699	2.68	55.7237	0.154507	16.9363	1.14499	0.00370625	6.16167	0.169772	5.74554	8.55415	4.3817	0.114049	0.909889	62.4
2000	1242	99.9983	280.951	-1.24422e+06	39.5795	149.699	2.685	55.7237	0.154507	16.9363	1.14537	0.00370625	6.16132	0.169772	5.74553	8.55414	4.3817	0.114049	0.909889	62.4
2000	1241	99.9984	280.853	-1.24437e+06	39.5763	149.699	2.69	55.7237	0.154507	16.9363	1.14576	0.00370625	6.16097	0.169772	5.74553	8.55414	4.3817	0.114049	0.909889	62.4
2000	1240	99.9984	280.754	-1.24452e+06	39.573	149.699	2.694	55.7237	0.154507	16.9363	1.14615	0.00370625	6.16061	0.169772	5.74553	8.55414	4.3817	0.114049	0.909888	62.4
2000	1239	99.9984	280.655	-1.24467e+06	39.5698	149.698	2.699	55.7236	0.154507	16.9363	1.14654	0.00370625	6.16026	0.169772	5.74553	8.55413	4.38169	0.114049	0.909888	62.4
2000	1238	99.9985	280.556	-1.24482e+06	39.5666	149.698	2.704	55.7236	0.154507	16.9363	1.14694	0.00370625	6.1599	0.169771	5.74552	8.55413	4.38169	0.114049	0.909888	62.4
2000	1237	99.9985	280.457	-1.24497e+06	39.5633	149.698	2.709	55.7236	0.154507	16.9363	1.14733	0.00370625	6.15954	0.169771	5.74552	8.55413	4.38169	0.114049	0.909887	62.4
2000	1236	99.9986	280.358	-1.24512e+06	39.5601	149.698	2.713	55.7236	0.154507	16.9363	1.14773	0.00370624	6.15918	0.169771	5.74552	8.55412	4.38169	0.114049	0.909887	62.4
2000	1235	99.9986	280.259	-1.24527e+06	39.5569	149.697	2.718	55.7235	0.154507	16.9363	1.14813	0.00370624	6.15882	0.169771	5.74552	8.55412	4.38169	0.114049	0.909886	62.4
2000	1234	99.9986	280.159	-1.24542e+06	39.5536	149.697	2.723	55.7235	0.154507	16.9363	1.14853	0.00370624	6.15845	0.169771	5.74552	8.55412	4.38169	0.114049	0.909886	62.4
2000	1233	99.9987	280.06	-1.24557e+06	39.5504	149.697	2.727	55.7235	0.154507	16.9363	1.14894	0.00370624	6.15809	0.169771	5.74551	8.55411	4.38168	0.114049	0.909886	62.4
2000	1232	99.9987	279.961	-1.24572e+06	39.5472	149.697	2.732	55.7235	0.154507	16.9362	1.14934	0.00370624	6.15772	0.169771	5.74551	8.55411	4.38168	0.114049	0.909885	62.4
2000	1231	99.9988	279.861	-1.24588e+06	39.5439	149.697	2.737	55.7235	0.154507	16.9362	1.14975	0.00370624	6.15735	0.169771	5.74551	8.55411	4.38168	0.114049	0.909885	62.4
2000	1230	99.9988	279.762	-1.24603e+06	39.5407	149.696	2.742	55.7234	0.154507	16.9362	1.15016	0.00370623	6.15697	0.169771	5.74551	8.5541	4.38168	0.114049	0.909885	62.5
2000	1229	99.9988	279.662	-1.24618e+06	39.5375	149.696	2.746	55.7234	0.154507	16.9362	1.15057	0.00370623	6.1566	0.169771	5.7455	8.5541	4.38168	0.114049	0.909884	62.5
2000	1228	99.9989	279.563	-1.24633e+06	39.5342	149.696	2.751	55.7234	0.154507	16.9362	1.15099	0.00370623	6.15622	0.169771	5.7455	8.5541	4.38167	0.114049	0.909884	62.5
2000	1227	99.9989	279.463	-1.24648e+06	39.531	149.696	2.756	55.7234	0.154506	16.9362	1.15141	0.00370623	6.15584	0.169771	5.7455	8.55409	4.38167	0.114049	0.909884	62.5
2000	1226	99.999	279.363	-1.24663e+06	39.5278	149.696	2.761	55.7233	0.154506	16.9362	1.15183	0.00370623	6.15546	0.169771	5.7455	8.55409	4.38167	0.114049	0.909883	62.5
2000	1225	99.999	279.264	-1.24678e+06	39.5245	149.695	2.765	55.7233	0.154506	16.9362	1.15225	0.00370623	6.15508	0.169771	5.74549	8.55409	4.38167	0.114049	0.909883	62.5
2000	1224	99.999	279.164	-1.24693e+06	39.5213	149.695	2.77	55.7233	0.154506	16.9362	1.15267	0.00370623	6.1547	0.169771	5.74549	8.55408	4.38167	0.114049	0.909882	62.5
2000	1223	99.9991	279.064	-1.24708e+06	39.5181	149.695	2.775	55.7233	0.154506	16.9362	1.1531	0.00370622	6.15431	0.16977	5.74549	8.55408	4.38167	0.114049	0.909882	62.5
2000	1222	99.9991	278.964	-1.24723e+06	39.5148	149.695	2.78	55.7232	0.154506	16.9362	1.15353	0.00370622	6.15392	0.16977	5.74549	8.55407	4.38166	0.114049	0.909882	62.5
2000	1221	99.9992	278.864	-1.24738e+06	39.5116	149.695	2.784	55.7232	0.154506	16.9362	1.15396	0.00370622	6.15353	0.16977	5.74548	8.55407	4.38166	0.114048	0.909881	62.5
2000	1220	99.9992	278.764	-1.24753e+06	39.5084	149.695	2.789	55.7232	0.154506	16.9362	1.15439	0.00370622	6.15314	0.16977	5.74548	8.55407	4.38166	0.114048	0.909881	62.5
2000	1219	99.9993	278.663	-1.24768e+06	39.5052	149.694	2.794	55.7232	0.154506	16.9362	1.15482	0.00370622	6.15275	0.16977	5.74548	8.55406	4.38166	0.114048	0.90988	62.5
2000	1218	99.9993	278.563	-1.24783e+06	39.5019	149.694	2.799	55.7231	0.154506	16.9361	1.15526	0.00370622	6.15235	0.16977	5.74548	8.55406	4.38166	0.114048	0.90988	62.5
2000	1217	99.9994	278.463	-1.24798e+06	39.4987	149.694	2.804	55.7231	0.154506	16.9361	1.1557	0.00370621	6.15195	0.16977	5.74547	8.55406	4.38165	0.114048	0.90988	62.5
2000	1216	99.9994	278.362	-1.24813e+06	39.4955	149.694	2.809	55.7231	0.154506	16.9361	1.15614	0.00370621	6.15155	0.16977	5.74547	8.55405	4.38165	0.114048	0.909879	62.5
2000	1215	99.9994	278.262	-1.24828e+06	39.4923	149.694	2.813	55.7231	0.154506	16.9361	1.15658	0.00370621	6.15115	0.16977	5.74547	8.55405	4.38165	0.114048	0.909879	62.5
2000	1214	99.9995	278.161	-1.24843e+06	39.489	149.693	2.818	55.723	0.154506	16.9361	1.15703	0.00370621	6.15075	0.16977	5.74547	8.55404	4.38165	0.114048	0.909878	62.5
2000	1213	99.9995	278.061	-1.24858e+06	39.4858	149.693	2.823	55.723	0.154506	16.9361	1.15748	0.00370621	6.15034	0.16977	5.74546	8.55404	4.38165	0.114048	0.909878	62.5
2000	1212	99.9996	277.96	-1.24873e+06	39.4826	149.693	2.828	55.723	0.154505	16.9361	1.15793	0.00370621	6.14993	0.16977	5.74546	8.55404	4.38164	0.114048	0.909878	62.5
2000	1211	99.9996	277.859	-1.24888e+06	39.4794	149.693	2.833	55.723	0.154505	16.9361	1.15838	0.0037062	6.14952	0.16977	5.74546	8.55403	4.38164	0.114048	0.909877	62.5
2000	1210	99.9997	277.758	-1.24903e+06	39.4761	149.693	2.838	55.7229	0.154505	16.9361	1.15883	0.0037062	6.14911	0.169769	5.74546	8.55403	4.38164	0.114048	0.909877	62.5
2000	1209	99.9997	277.658	-1.24918e+06	39.4729	149.693	2.843	55.7229	0.154505	16.9361	1.15929	0.0037062	6.14869	0.169769	5.74545	8.55403	4.38164	0.114048	0.909876	62.5
2000	1208	99.9998	277.557	-1.24933e+06	39.4697	149.692	2.847	55.7229	0.154505	16.9361	1.15975	0.0037062	6.14828	0.169769	5.74545	8.55402	4.38164	0.114048	0.909876	62.5
2000	1207	99.9998	277.456	-1.24948e+06	39.4665	149.692	2.852	55.7229	0.154505	16.9361	1.16021	0.0037062	6.14786	0.169769	5.74545	8.55402	4.38163	0.114048	0.909875	62.5
2000	1206	99.9999	277.357	-1.24963e+06	39.4632	145.013	2.857	55.7228	0.154505	16.9361	1.16068	0.0037062	6.14744	0.169769	5.74545	8.55401	4.38163	0.114048	0.909875	62.5
2000	1205	99.9999	277.259	-1.24978e+06	39.46	145.012	2.862	55.7228	0.154505	16.936	1.16114	0.00370619	6.14701	0.169769	5.74544	8.55401	4.38163	0.114048	0.909875	62.5
2000	1204	99.9999	277.161	-1.24992e+06	39.4568	145.011	2.867	55.7228	0.154505	16.936	1.16161	0.00370619	6.14659	0.169769	5.74544	8.55401	4.38163	0.114048	0.909874	62.5
2000	1203	100	277.063	-1.25007e+06	39.4536	145.009	2.872	55.7228	0.154505	16.936	1.16208	0.00370619	6.14616	0.169769	5.74544	8.554	4.38163	0.114048	0.909874	62.5
2000	1202	100	276.965	-1.25021e+06	39.4504	145.008	2.877	55.7227	0.154505	16.936	1.16255	0.00370619	6.14573	0.169769	5.74543	8.554	4.38162	0.114047	0.909873	62.5
2000	1201	100	276.867	-1.25036e+06	39.4471	145.007	2.882	55.7227	0.154505	16.936	1.16303	0.00370619	6.1453	0.169769	5.74543	8.55399	4.38162	0.114047	0.909873	62.5
2000	1200	100	276.768	-1.2505e+06	39.4439	145.006	2.887	55.7227	0.154505	16.936	1.16351	0.00370619	6.14487	0.169769	5.74543	8.55399	4.38162	0.114047	0.909872	62.5
2000	1199	100	276.67	-1.25065e+06	39.4407	145.004	2.892	55.7227	0.154505	16.936	1.16399	0.00370618	6.14443	0.169769	5.74543	8.55398	4.38162	0.114047	0.909872	62.5
2000	1198	100	276.572	-1.2508e+06	39.4375	145.003	2.897	55.7226	0.154504	16.936	1.16447	0.00370618	6.144	0.169769	5.74542	8.55398	4.38162	0.114047	0.909872	62.5
2000	1197	100	276.473	-1.25094e+06	39.4343	145.002	2.902	55.7226	0.154504	16.936	1.16495	0.00370618	6.14356	0.169768	5.74542	8.55398	4.38161	0.114047	0.909871	62.5
2000	1196	100	276.374	-1.25109e+06	39.431	145	2.907	55.7226	0.154504	16.936	1.16544	0.00370618	6.14311	0.169768	5.74542	8.55397	4.38161	0.114047	0.909871	62.5
2000	1195	100	276.276	-1.25123e+06	39.4278	144.999	2.911	55.7225	0.154504	16.936	1.16593	0.00370618	6.14267	0.169768	5.74541	8.55397	4.38161	0.114047	0.90987	62.5
2000	1194	100	276.177	-1.25138e+06	39.4246	144.998	2.916	55.7225	0.154504	16.936	1.16642	0.00370617	6.14222	0.169768	5.74541	8.55396	4.38161	0.114047	0.90987	62.5
2000	1193	100	276.078	-1.25152e+06	39.4214	144.996	2.921	55.7225	0.154504	16.9359	1.16692	0.00370617	6.14178	0.169768	5.74541	8.55396	4.3816	0.114047	0.909869	62.5
2000	1192	100.001	275.979	-1.25167e+06	39.4182	144.995	2.926	55.7225	0.154504	16.9359	1.16742	0.00370617	6.14132	0.169768	5.74541	8.55396	4.3816	0.114047	0.909869	62.5
2000	1191	100.001	275.881	-1.25182e+06	39.415	144.994	2.931	55.7224	0.154504	16.9359	1.16791	0.00370617	6.14087	0.169768	5.7454	8.55395	4.3816	0.114047	0.909868	62.5
2000	1190	100.001	275.782	-1.25196e+06	39.4117	144.992	2.936	55.7224	0.154504	16.9359	1.16842	0.00370617	6.14042	0.169768	5.7454	8.55395	4.3816	0.114047	0.909868	62.5
2000	1189	100.001	275.683	-1.25211e+06	39.4085	144.991	2.941	55.7224	0.154504	16.9359	1.16892	0.00370617	6.13996	0.169768	5.7454	8.55394	4.3816	0.114047	0.909868	62.5
2000	1188	100.001	275.583	-1.25225e+06	39.4053	144.99	2.946	55.7224	0.154504	16.9359	1.16943	0.00370616	6.1395	0.169768	5.74539	8.55394	4.38159	0.114047	0.909867	62.5
2000	1187	100.001	275.484	-1.2524e+06	39.4021	144.988	2.951	55.7223	0.154504	16.9359	1.16994	0.00370616	6.13904	0.169768	5.74539	8.55393	4.38159	0.114047	0.909867	62.5
2000	1186	100.001	275.385	-1.25254e+06	39.3989	144.987	2.956	55.7223	0.154504	16.9359	1.17045	0.00370616	6.13857	0.169767	5.74539	8.55393	4.38159	0.114047	0.909866	62.5
2000	1185	100.001	275.286	-1.25269e+06	39.3957	144.985	2.962	55.7223	0.154503	16.9359	1.17096	0.00370616	6.13811	0.169767	5.74539	8.55392	4.38159	0.114047	0.909866	62.5
2000	1184	100.001	275.186	-1.25284e+06	39.3925	144.984	2.967	55.7222	0.154503	16.9359	1.17148	0.00370616	6.13764	0.169767	5.74538	8.55392	4.38158	0.114046	0.909865	62.5
2000	1183	100.001	275.087	-1.25298e+06	39.3892	144.983	2.972	55.7222	0.154503	16.9359	1.172	0.00370615	6.13717	0.169767	5.74538	8.55392	4.38158	0.114046	0.909865	62.5
2000	1182	100.001	274.987	-1.25313e+06	39.386	144.981	2.977	55.7222	0.154503	16.9359	1.17252	0.00370615	6.1367	0.169767	5.74538	8.55391	4.38158	0.114046	0.909864	62.5
2000	1181	100.001	274.888	-1.25327e+06	39.3828	144.98	2.982	55.7221	0.154503	16.9358	1.17304	0.00370615	6.13622	0.169767	5.74537	8.55391	4.38158	0.114046	0.909864	62.5
2000	1180	100.001	274.788	-1.25342e+06	39.3796	144.978	2.987	55.7221	0.154503	16.9358	1.17357	0.00370615	6.13574	0.169767	5.74537	8.5539	4.38158	0.114046	0.909863	62.5
2000	1179	100.001	274.688	-1.25356e+06	39.3764	144.977	2.992	55.7221	0.154503	16.9358	1.1741	0.00370615	6.13526	0.169767	5.74537	8.5539	4.38157	0.114046	0.909863	62.5
2000	1178	100.001	274.589	-1.25371e+06	39.3732	144.976	2.997	55.7221	0.154503	16.9358	1.17463	0.00370614	6.13478	0.169767	5.74536	8.55389	4.38157	0.114046	0.909862	62.5
2000	1177	100.001	274.489	-1.25386e+06	39.37	144.974	3.002	55.722	0.154503	16.9358	1.17516	0.00370614	6.1343	0.169767	5.74536	8.55389	4.38157	0.114046	0.909862	62.5
2000	1176	100.001	274.389	-1.254e+06	39.3668	144.973	3.007	55.722	0.154503	16.9358	1.1757	0.00370614	6.13381	0.169767	5.74536	8.55388	4.38157	0.114046	0.909861	62.5
2000	1175	100.001	274.289	-1.25415e+06	39.3636	144.971	3.012	55.722	0.154503	16.9358	1.17624	0.00370614	6.13332	0.169766	5.74536	8.55388	4.38156	0.114046	0.909861	62.5
2000	1174	100.001	274.189	-1.25429e+06	39.3604	144.97	3.017	55.7219	0.154503	16.9358	1.17678	0.00370614	6.13283	0.169766	5.74535	8.55388	4.38156	0.114046	0.90986	62.5
2000	1173	99.804	273.564	-1.252e+06	39.2865	144.652	3.026	55.7234	0.154778	16.9647	1.17686	0.00371347	6.12533	0.170102	5.69845	8.56658	4.39018	0.114271	0.911661	62.4
2000	1172	99.6782	273.13	-1.25059e+06	39.2383	144.448	3.034	55.7243	0.154954	16.9832	1.17711	0.00371816	6.12031	0.170317	5.66851	8.57468	4.39569	0.114416	0.912811	62.3
2000	1171	99.5529	272.697	-1.24918e+06	39.1902	144.246	3.042	55.7252	0.15513	17.0016	1.17734	0.00372284	6.11527	0.170531	5.63867	8.58275	4.40119	0.11456	0.91396	62.2
2000	1170	98.9148	270.904	-1.24102e+06	38.946	143.278	3.048	55.7478	0.156093	16.9797	1.18164	0.00374685	6.13021	0.171631	5.60225	8.57566	4.41611	0.115243	0.919856	62
2000	1169	97.9209	268.168	-1.22816e+06	38.5656	141.78	3.053	55.786	0.157626	16.9287	1.18886	0.00378488	6.15948	0.173373	5.56125	8.55769	4.43775	0.116315	0.929192	61.7
2000	1168	96.9469	265.487	-1.21556e+06	38.1927	140.312	3.058	55.8239	0.159159	16.8778	1.19607	0.00382291	6.18859	0.175115	5.52052	8.53981	4.45928	0.117385	0.938528	61.4
2000	1167	95.9921	262.859	-1.20322e+06	37.8272	138.874	3.063	55.8617	0.160692	16.8271	1.20325	0.00386093	6.21751	0.176857	5.48004	8.522	4.4807	0.118455	0.947863	61.1
2000	1166	95.0561	260.281	-1.19111e+06	37.4688	137.464	3.068	55.8993	0.162224	16.7764	1.21042	0.00389895	6.24626	0.178599	5.43981	8.50429	4.50202	0.119523	0.957197	60.8
2000	1165	94.1381	257.754	-1.17924e+06	37.1173	136.081	3.073	55.9368	0.163757	16.7259	1.21758	0.00393697	6.27484	0.18034	5.39984	8.48665	4.52324	0.120589	0.966531	60.5
2000	1164	93.2378	255.275	-1.16761e+06	36.7725	134.726	3.078	55.9741	0.165289	16.6755	1.22471	0.00397499	6.30325	0.182082	5.36011	8.46909	4.54435	0.121655	0.975864	60.2
2000	1163	92.2572	252.593	-1.15507e+06	36.4013	133.242	3.086	56.0183	0.166818	16.6603	1.23026	0.00401724	6.33176	0.184017	5.30924	8.4137	4.57255	0.122862	0.986236	59.9
2000	1162	91.3224	250.031	-1.14309e+06	36.0463	131.831	3.093	56.0604	0.168344	16.6359	1.23618	0.00405836	6.36002	0.185901	5.26174	8.36835	4.5987	0.12403	0.996332	59.6
2000	1161	90.4073	247.524	-1.13137e+06	35.6988	130.449	3.1	56.1023	0.169867	16.6114	1.24208	0.00409944	6.3881	0.187782	5.21469	8.32333	4.62467	0.125195	1.00642	59.3
2000	1160	89.5114	245.068	-1.11989e+06	35.3585	129.096	3.107	56.144	0.171386	16.5868	1.24796	0.00414047	6.416	0.189662	5.16806	8.27863	4.65046	0.126357	1.01649	58.9
2000	1159	88.6339	242.663	-1.10864e+06	35.0251	127.772	3.114	56.1856	0.172902	16.562	1.25382	0.00418146	6.44373	0.191539	5.12185	8.23425	4.67606	0.127517	1.02655	58.6
2000	1158	87.7744	240.306	-1.09764e+06	34.6985	126.475	3.121	56.2269	0.174415	16.5371	1.25965	0.0042224	6.47129	0.193415	5.07607	8.19019	4.70149	0.128675	1.0366	58.3
2000	1157	86.9323	237.997	-1.08685e+06	34.3785	125.205	3.128	56.268	0.175924	16.5121	1.26547	0.00426331	6.49867	0.195289	5.0307	8.14643	4.72674	0.12983	1.04665	58
2000	1156	86.0837	235.674	-1.07603e+06	34.0568	123.928	3.135	56.3116	0.177476	16.4876	1.27059	0.00430533	6.52149	0.197214	4.98552	8.10342	4.7528	0.131016	1.05696	57.7
2000	1155	85.2473	233.385	-1.06537e+06	33.7396	122.67	3.142	56.3552	0.179038	16.4625	1.27573	0.00434758	6.54408	0.199149	4.94027	8.06134	4.7788	0.132208	1.06733	57.4
2000	1154	84.4277	231.141	-1.05493e+06	33.4288	121.438	3.148	56.3986	0.180597	16.4373	1.28084	0.00438978	6.56651	0.201082	4.89544	8.01956	4.80462	0.133396	1.0777	57.1
2000	1153	83.6244	228.941	-1.04469e+06	33.1241	120.23	3.155	56.4418	0.182152	16.4119	1.28594	0.00443195	6.58877	0.203014	4.85102	7.97806	4.83027	0.134583	1.08805	56.7
2000	1152	82.837	226.785	-1.03466e+06	32.8254	119.047	3.162	56.4848	0.183705	16.3864	1.29103	0.00447408	6.61088	0.204943	4.80701	7.93684	4.85575	0.135767	1.09839	56.4
2000	1151	82.0649	224.67	-1.02482e+06	32.5324	117.887	3.169	56.5277	0.185254	16.3607	1.29609	0.00451617	6.63284	0.206871	4.7634	7.8959	4.88106	0.136948	1.10872	56.1
2000	1150	81.3078	222.596	-1.01518e+06	32.2451	116.75	3.176	56.5703	0.1868	16.335	1.30114	0.00455822	6.65464	0.208798	4.72019	7.85523	4.90621	0.138127	1.11905	55.8
2000	1149	80.5651	220.561	-1.00572e+06	31.9631	115.635	3.182	56.6127	0.188344	16.3091	1.30618	0.00460024	6.67629	0.210723	4.67737	7.81485	4.93118	0.139304	1.12936	55.5
2000	1148	79.8365	218.565	-996442	31.6865	114.541	3.189	56.655	0.189884	16.2831	1.31119	0.00464223	6.69779	0.212646	4.63493	7.77473	4.95599	0.140478	1.13967	55.2
2000	1147	79.1215	216.606	-987339	31.415	113.468	3.196	56.697	0.191422	16.2569	1.3162	0.00468417	6.71914	0.214567	4.59289	7.73488	4.98064	0.14165	1.14997	54.9
2000	1146	78.4199	214.683	-978406	31.1485	112.416	3.202	56.7389	0.192957	16.2307	1.32119	0.00472609	6.74036	0.216487	4.55122	7.6953	5.00512	0.14282	1.16026	54.6
2000	1145	77.7311	212.795	-969638	30.8868	111.383	3.209	56.7806	0.194489	16.2043	1.32616	0.00476796	6.76143	0.218405	4.50993	7.65599	5.02944	0.143987	1.17054	54.3
2000	1144	77.0548	210.941	-961031	30.6298	110.369	3.215	56.8221	0.196018	16.1778	1.33112	0.00480981	6.78236	0.220322	4.46901	7.61694	5.05361	0.145152	1.18081	54
2000	1143	76.3908	209.12	-952580	30.3774	109.374	3.221	56.8634	0.197545	16.1512	1.33607	0.00485162	6.80315	0.222237	4.42845	7.57814	5.07761	0.146315	1.19108	53.7
2000	1142	75.7386	207.331	-944282	30.1295	108.397	3.228	56.9045	0.199068	16.1244	1.341	0.0048934	6.82381	0.224151	4.38827	7.53961	5.10145	0.147475	1.20133	53.4
2000	1141	75.098	205.574	-936131	29.8859	107.437	3.234	56.9455	0.20059	16.0976	1.34592	0.00493514	6.84433	0.226063	4.34844	7.50133	5.12514	0.148634	1.21158	53.1
2000	1140	74.4685	203.848	-928124	29.6465	106.494	3.24	56.9862	0.202108	16.0706	1.35083	0.00497685	6.86473	0.227974	4.30897	7.46331	5.14868	0.14979	1.22182	52.8
2000	1139	73.85	202.151	-920257	29.4112	105.568	3.246	57.0268	0.203625	16.0435	1.35573	0.00501854	6.88499	0.229883	4.26985	7.42553	5.17206	0.150943	1.23206	52.5
2000	1138	73.2422	200.483	-912526	29.1799	104.659	3.253	57.0672	0.205138	16.0164	1.36061	0.00506018	6.90512	0.231791	4.23107	7.38801	5.19528	0.152095	1.24228	52.2
2000	1137	72.6447	198.844	-904928	28.9526	103.765	3.259	57.1074	0.206649	15.9891	1.36548	0.0051018	6.92513	0.233698	4.19265	7.35073	5.21836	0.153244	1.2525	51.9
2000	1136	72.0573	197.232	-897459	28.729	102.886	3.265	57.1474	0.208158	15.9617	1.37034	0.00514339	6.94502	0.235603	4.15456	7.3137	5.24129	0.154391	1.26271	51.6
2000	1135	71.4797	195.646	-890116	28.5091	102.023	3.271	57.1873	0.209664	15.9342	1.37519	0.00518495	6.96478	0.237506	4.11681	7.27691	5.26406	0.155536	1.27291	51.3
2000	1134	70.9117	194.087	-882896	28.2928	101.174	3.277	57.227	0.211168	15.9065	1.38003	0.00522648	6.98442	0.239409	4.0794	7.24036	5.28669	0.156679	1.28311	51
2000	1133	70.3531	192.553	-875795	28.08	100.339	3.283	57.2665	0.21267	15.8788	1.38486	0.00526799	7.00394	0.24131	4.04232	7.20405	5.30917	0.15782	1.2933	50.7
2000	1132	69.8035	191.044	-868811	27.8706	99.5176	3.289	57.3058	0.21417	15.851	1.38968	0.00530946	7.02334	0.24321	4.00556	7.16797	5.33151	0.158958	1.30348	50.4
2000	1131	69.2629	189.559	-861940	27.6646	98.7101	3.294	57.345	0.215667	15.8231	1.39449	0.00535091	7.04262	0.245108	3.96912	7.13213	5.3537	0.160095	1.31365	50.1
2000	1130	68.7308	188.098	-855180	27.4618	97.9158	3.3	57.3839	0.217162	15.7951	1.39929	0.00539233	7.06179	0.247005	3.93301	7.09653	5.37575	0.161229	1.32382	49.8
2000	1129	68.2073	186.659	-848529	27.2622	97.1342	3.306	57.4228	0.218655	15.7669	1.40409	0.00543372	7.08085	0.248902	3.89721	7.06115	5.39766	0.162362	1.33398	49.5
2000	1128	67.6919	185.244	-841982	27.0657	96.3652	3.312	57.4614	0.220146	15.7387	1.40887	0.00547509	7.0998	0.250796	3.86173	7.026	5.41943	0.163492	1.34414	49.2
2000	1127	67.1846	183.85	-835539	26.8722	95.6085	3.317	57.4999	0.221635	15.7104	1.41364	0.00551643	7.11863	0.25269	3.82655	6.99108	5.44105	0.16462	1.35429	48.9
2000	1126	66.6851	182.477	-829195	26.6816	94.8636	3.323	57.5382	0.223121	15.682	1.41841	0.00555775	7.13736	0.254583	3.79168	6.95638	5.46254	0.165746	1.36443	48.6
2000	1125	66.1933	181.125	-822950	26.494	94.1304	3.328	57.5763	0.224606	15.6535	1.42317	0.00559904	7.15598	0.256474	3.75712	6.9219	5.48389	0.16687	1.37457	48.3
2000	1124	65.709	179.794	-816801	26.3091	93.4085	3.334	57.6143	0.226089	15.6249	1.42792	0.00564031	7.17449	0.258365	3.72285	6.88765	5.50511	0.167993	1.3847	48
2000	1123	65.232	178.482	-810744	26.127	92.6977	3.339	57.6521	0.22757	15.5962	1.43266	0.00568156	7.1929	0.260254	3.68888	6.85361	5.52619	0.169113	1.39483	47.7
2000	1122	64.7621	177.19	-804779	25.9475	91.9977	3.345	57.6897	0.229049	15.5675	1.43739	0.00572278	7.2112	0.262142	3.65521	6.8198	5.54713	0.170231	1.40495	47.5
2000	1121	64.2991	175.917	-798903	25.7707	91.3084	3.35	57.7272	0.230526	15.5386	1.44212	0.00576398	7.2294	0.26403	3.62182	6.78619	5.56794	0.171347	1.41506	47.2
2000	1120	63.843	174.662	-793115	25.5965	90.6293	3.356	57.7645	0.232001	15.5097	1.44684	0.00580516	7.2475	0.265916	3.58873	6.7528	5.58862	0.172462	1.42517	46.9
2000	1119	63.3935	173.426	-787411	25.4247	89.9604	3.361	57.8017	0.233475	15.4806	1.45156	0.00584632	7.2655	0.267802	3.55591	6.71963	5.60917	0.173574	1.43528	46.6
2000	1118	62.9505	172.207	-781790	25.2554	89.3013	3.366	57.8386	0.234947	15.4515	1.45626	0.00588746	7.2834	0.269686	3.52338	6.68666	5.62958	0.174684	1.44538	46.3
2000	1117	62.5139	171.006	-776251	25.0885	88.6518	3.372	57.8755	0.236417	15.4223	1.46096	0.00592858	7.3012	0.27157	3.49113	6.6539	5.64987	0.175793	1.45547	46
2000	1116	62.0835	169.821	-770791	24.9239	88.0118	3.377	57.9121	0.237886	15.393	1.46566	0.00596969	7.31891	0.273452	3.45916	6.62134	5.67003	0.1769	1.46556	45.7
2000	1115	61.6592	168.654	-765408	24.7616	87.381	3.382	57.9486	0.239353	15.3636	1.47035	0.00601077	7.33652	0.275334	3.42745	6.589	5.69006	0.178004	1.47565	45.4
2000	1114	61.2408	167.502	-760102	24.6015	86.7593	3.387	57.985	0.240818	15.3342	1.47503	0.00605183	7.35403	0.277215	3.39602	6.55685	5.70997	0.179107	1.48573	45.1
2000	1113	60.8282	166.366	-754870	24.4437	86.1463	3.392	58.0212	0.242282	15.3046	1.47971	0.00609288	7.37145	0.279096	3.36485	6.52491	5.72975	0.180209	1.49581	44.9
2000	1112	60.4213	165.246	-749710	24.2879	85.542	3.397	58.0572	0.243744	15.275	1.48439	0.00613391	7.38878	0.280975	3.33395	6.49316	5.74941	0.181308	1.50588	44.6
2000	1111	60.02	164.141	-744622	24.1343	84.9461	3.402	58.0931	0.245205	15.2453	1.48906	0.00617493	7.40602	0.282854	3.30331	6.46161	5.76894	0.182405	1.51595	44.3
2000	1110	59.6241	163.05	-739604	23.9827	84.3585	3.407	58.1289	0.246664	15.2156	1.49372	0.00621593	7.42317	0.284732	3.27293	6.43026	5.78835	0.183501	1.52602	44
2000	1109	59.2336	161.974	-734653	23.8331	83.7789	3.412	58.1644	0.248122	15.1857	1.49838	0.00625691	7.44023	0.286609	3.24281	6.39911	5.80764	0.184595	1.53608	43.7
2000	1108	58.8482	160.913	-729769	23.6854	83.2073	3.417	58.1999	0.249579	15.1558	1.50303	0.00629788	7.4572	0.288486	3.21294	6.36815	5.82681	0.185687	1.54614	43.4
2000	1107	58.468	159.865	-724950	23.5397	82.6434	3.422	58.2351	0.251034	15.1258	1.50768	0.00633883	7.47408	0.290362	3.18332	6.33737	5.84586	0.186777	1.55619	43.1
2000	1106	58.0928	158.831	-720196	23.3959	82.0871	3.426	58.2703	0.252488	15.0958	1.51233	0.00637978	7.49088	0.292237	3.15396	6.30679	5.86479	0.187866	1.56624	42.9
2000	1105	57.7225	157.811	-715504	23.2539	81.5382	3.431	58.3053	0.253941	15.0656	1.51697	0.00642071	7.50758	0.294112	3.12483	6.2764	5.8836	0.188953	1.57629	42.6
2000	1104	57.3569	156.803	-710873	23.1137	80.9965	3.436	58.3401	0.255392	15.0354	1.52161	0.00646162	7.52421	0.295987	3.09595	6.2462	5.9023	0.190038	1.58634	42.3
2000	1103	56.9961	155.809	-706302	22.9753	80.4621	3.441	58.3748	0.256843	15.0052	1.52625	0.00650253	7.54075	0.29786	3.06732	6.21618	5.92088	0.191122	1.59638	42
2000	1102	56.6399	154.827	-701790	22.8387	79.9345	3.445	58.4093	0.258292	14.9748	1.53088	0.00654342	7.55721	0.299734	3.03892	6.18634	5.93934	0.192203	1.60642	41.7
2000	1101	56.2882	153.857	-697336	22.7037	79.4139	3.45	58.4437	0.25974	14.9444	1.53551	0.00658431	7.57358	0.301606	3.01076	6.15669	5.95769	0.193284	1.61645	41.5
2000	1100	55.941	152.899	-692938	22.5704	78.8999	3.454	58.4779	0.261187	14.9139	1.54013	0.00662518	7.58987	0.303479	2.98283	6.12721	5.97593	0.194362	1.62649	41.2
2000	1099	55.598	151.954	-688596	22.4387	78.3925	3.459	58.512	0.262632	14.8834	1.54475	0.00666605	7.60608	0.305351	2.95513	6.09792	5.99406	0.195439	1.63652	40.9
2000	1098	55.2593	151.019	-684308	22.3086	77.8915	3.463	58.546	0.264077	14.8528	1.54937	0.0067069	7.62221	0.307222	2.92766	6.06881	6.01207	0.196514	1.64655	40.6
2000	1097	54.9248	150.097	-680073	22.1801	77.3968	3.468	58.5798	0.265521	14.8221	1.55399	0.00674775	7.63826	0.309093	2.90042	6.03987	6.02997	0.197588	1.65658	40.4
2000	1096	54.5944	149.185	-675891	22.0531	76.9083	3.472	58.6135	0.266964	14.7914	1.5586	0.00678859	7.65423	0.310964	2.87341	6.01111	6.04777	0.198659	1.66661	40.1
2000	1095	54.268	148.284	-671759	21.9277	76.4259	3.477	58.647	0.268405	14.7606	1.56322	0.00682942	7.67013	0.312834	2.84662	5.98252	6.06545	0.19973	1.67663	39.8
2000	1094	53.9455	147.394	-667678	21.8037	75.9494	3.481	58.6804	0.269846	14.7297	1.56782	0.00687025	7.68594	0.314704	2.82004	5.9541	6.08303	0.200799	1.68665	39.5
2000	1093	53.6269	146.515	-663646	21.6812	75.4788	3.485	58.7137	0.271286	14.6988	1.57243	0.00691107	7.70168	0.316574	2.79369	5.92586	6.1005	0.201866	1.69667	39.3
2000	1092	53.312	145.646	-659663	21.5601	75.0139	3.489	58.7468	0.272725	14.6679	1.57704	0.00695188	7.71734	0.318444	2.76755	5.89778	6.11786	0.202931	1.70669	39
2000	1091	53.0009	144.787	-655726	21.4404	74.5546	3.494	58.7798	0.274163	14.6368	1.58164	0.00699269	7.73292	0.320313	2.74163	5.86987	6.13511	0.203995	1.71671	38.7
2000	1090	52.6934	143.938	-651837	21.322	74.1008	3.498	58.8127	0.275601	14.6057	1.58624	0.0070335	7.74843	0.322182	2.71591	5.84213	6.15227	0.205058	1.72673	38.4
2000	1089	52.3895	143.099	-647992	21.205	73.6524	3.502	58.8454	0.277038	14.5746	1.59084	0.0070743	7.76387	0.324051	2.69041	5.81456	6.16931	0.206119	1.73675	38.2
2000	1088	52.0891	142.269	-644193	21.0894	73.2093	3.506	58.878	0.278473	14.5434	1.59544	0.00711509	7.77923	0.32592	2.66512	5.78715	6.18626	0.207178	1.74676	37.9
2000	1087	51.7922	141.449	-640438	20.975	72.7715	3.51	58.9104	0.279909	14.5121	1.60004	0.00715589	7.79451	0.327789	2.64003	5.7599	6.2031	0.208236	1.75678	37.6
2000	1086	51.4986	140.638	-636726	20.8619	72.3387	3.514	58.9427	0.281343	14.4808	1.60463	0.00719668	7.80973	0.329657	2.61514	5.73282	6.21984	0.209293	1.76679	37.4
2000	1085	51.2083	139.836	-633056	20.7501	71.911	3.518	58.9749	0.282777	14.4495	1.60923	0.00723747	7.82487	0.331526	2.59046	5.70589	6.23648	0.210348	1.77681	37.1
2000	1084	50.9214	139.043	-629428	20.6395	71.4882	3.522	59.007	0.28421	14.418	1.61382	0.00727826	7.83994	0.333394	2.56597	5.67913	6.25302	0.211401	1.78682	36.8
2000	1083	50.6376	138.259	-625841	20.5301	71.0702	3.526	59.0389	0.285643	14.3866	1.61841	0.00731905	7.85493	0.335263	2.54169	5.65252	6.26946	0.212453	1.79683	36.6
2000	1082	50.3569	137.483	-622293	20.4219	70.657	3.53	59.0707	0.287075	14.355	1.623	0.00735984	7.86986	0.337131	2.5176	5.62607	6.2858	0.213504	1.80685	36.3
2000	1081	50.0794	136.716	-618786	20.3148	70.2484	3.534	59.1024	0.288506	14.3235	1.62759	0.00740063	7.88471	0.339	2.4937	5.59978	6.30204	0.214553	1.81686	36
2000	1080	49.8049	135.957	-615317	20.2089	69.8445	3.538	59.1339	0.289937	14.2919	1.63218	0.00744142	7.89949	0.340868	2.46999	5.57364	6.31818	0.2156	1.82688	35.8
2000	1079	49.5334	135.207	-611886	20.1041	69.445	3.542	59.1653	0.291367	14.2602	1.63677	0.00748221	7.9142	0.342737	2.44648	5.54765	6.33423	0.216647	1.83689	35.5
2000	1078	49.2648	134.464	-608492	20.0005	69.05	3.545	59.1966	0.292797	14.2285	1.64136	0.007523	7.92885	0.344605	2.42315	5.52182	6.35019	0.217692	1.84691	35.2
2000	1077	48.999	133.729	-605136	19.8979	68.6593	3.549	59.2278	0.294227	14.1967	1.64595	0.0075638	7.94342	0.346474	2.40001	5.49614	6.36605	0.218735	1.85692	35
2000	1076	48.7362	133.002	-601815	19.7963	68.2729	3.553	59.2588	0.295656	14.1649	1.65054	0.0076046	7.95792	0.348343	2.37706	5.4706	6.38181	0.219777	1.86694	34.7
2000	1075	48.4761	132.283	-598530	19.6959	67.8906	3.556	59.2898	0.297084	14.1331	1.65513	0.0076454	7.97236	0.350212	2.35429	5.44522	6.39748	0.220818	1.87695	34.5
2000	1074	48.2187	131.571	-595280	19.5964	67.5126	3.56	59.3206	0.298513	14.1012	1.65971	0.00768621	7.98672	0.352081	2.3317	5.41998	6.41306	0.221857	1.88697	34.2
2000	1073	47.964	130.866	-592064	19.498	67.1385	3.564	59.3512	0.29994	14.0692	1.6643	0.00772702	8.00102	0.35395	2.30929	5.39489	6.42854	0.222895	1.89699	34
2000	1072	47.712	130.169	-588882	19.4006	66.7685	3.567	59.3818	0.301368	14.0372	1.66889	0.00776784	8.01525	0.35582	2.28705	5.36994	6.44394	0.223932	1.90701	33.7
2000	1071	47.4626	129.479	-585733	19.3041	66.4024	3.571	59.4122	0.302795	14.0052	1.67348	0.00780866	8.02941	0.35769	2.265	5.34514	6.45924	0.224967	1.91703	33.4
2000	1070	47.2157	128.796	-582617	19.2086	66.0401	3.574	59.4426	0.304222	13.9731	1.67806	0.00784949	8.04351	0.35956	2.24311	5.32048	6.47446	0.226001	1.92706	33.2
2000	1069	46.9714	128.119	-579533	19.1141	65.6816	3.578	59.4728	0.305649	13.941	1.68265	0.00789032	8.05754	0.361431	2.2214	5.29597	6.48958	0.227033	1.93708	32.9
2000	1068	46.7295	127.45	-576480	19.0205	65.3269	3.581	59.5028	0.307075	13.9089	1.68724	0.00793116	8.0715	0.363301	2.19987	5.27159	6.50462	0.228065	1.94711	32.7
2000	1067	46.49	126.787	-573458	18.9278	64.9758	3.584	59.5328	0.308501	13.8767	1.69183	0.00797201	8.08539	0.365173	2.1785	5.24736	6.51957	0.229095	1.95714	32.4
2000	1066	46.253	126.131	-570467	18.8361	64.6284	3.588	59.5627	0.309927	13.8445	1.69642	0.00801287	8.09922	0.367044	2.1573	5.22326	6.53443	0.230123	1.96717	32.2
2000	1065	46.0183	125.481	-567506	18.7452	64.2844	3.591	59.5924	0.311353	13.8122	1.70101	0.00805373	8.11298	0.368916	2.13626	5.1993	6.5492	0.231151	1.9772	31.9
2000	1064	45.7859	124.837	-564575	18.6552	63.944	3.594	59.622	0.312779	13.7799	1.7056	0.00809461	8.12667	0.370788	2.11539	5.17547	6.56389	0.232177	1.98723	31.7
2000	1063	45.5558	124.2	-561673	18.566	63.607	3.598	59.6515	0.314204	13.7475	1.71019	0.00813549	8.1403	0.372661	2.09469	5.15179	6.57849	0.233202	1.99727	31.4
2000	1062	45.328	123.569	-558799	18.4777	63.2734	3.601	59.6809	0.31563	13.7152	1.71478	0.00817639	8.15386	0.374535	2.07415	5.12823	6.59301	0.234225	2.00731	31.2
2000	1061	45.1023	122.944	-555953	18.3903	62.9432	3.604	59.7102	0.317055	13.6827	1.71937	0.00821729	8.16736	0.376408	2.05376	5.10481	6.60745	0.235248	2.01735	30.9
2000	1060	44.8789	122.325	-553136	18.3036	62.6162	3.607	59.7394	0.31848	13.6503	1.72396	0.00825821	8.18079	0.378282	2.03354	5.08153	6.6218	0.236269	2.0274	30.7
2000	1059	44.6575	121.712	-550345	18.2178	62.2924	3.61	59.7685	0.319905	13.6178	1.72856	0.00829914	8.19416	0.380157	2.01347	5.05837	6.63607	0.237289	2.03745	30.4
2000	1058	44.4383	121.104	-547582	18.1327	61.9718	3.614	59.7974	0.321331	13.5853	1.73315	0.00834008	8.20746	0.382033	1.99356	5.03535	6.65025	0.238307	2.0475	30.2
2000	1057	44.2212	120.503	-544845	18.0485	61.6543	3.617	59.8263	0.322756	13.5528	1.73774	0.00838103	8.22069	0.383908	1.97381	5.01245	6.66436	0.239325	2.05755	29.9
2000	1056	44.0061	119.907	-542134	17.965	61.3399	3.62	59.855	0.324181	13.5202	1.74234	0.00842199	8.23386	0.385785	1.95421	4.98968	6.67838	0.240341	2.06761	29.7
2000	1055	43.793	119.316	-539448	17.8823	61.0285	3.623	59.8837	0.325606	13.4876	1.74694	0.00846297	8.24696	0.387662	1.93475	4.96704	6.69233	0.241356	2.07767	29.5
2000	1054	43.5819	118.731	-536788	17.8003	60.7201	3.626	59.9122	0.327031	13.4549	1.75154	0.00850396	8.26	0.38954	1.91545	4.94453	6.70619	0.24237	2.08773	29.2
2000	1053	43.3728	118.151	-534153	17.7191	60.4147	3.629	59.9406	0.328457	13.4222	1.75613	0.00854497	8.27298	0.391418	1.8963	4.92215	6.71998	0.243383	2.0978	29
2000	1052	43.1655	117.577	-531543	17.6386	60.1121	3.632	59.9689	0.329882	13.3895	1.76073	0.00858599	8.28588	0.393297	1.8773	4.89988	6.73369	0.244394	2.10787	28.7
2000	1051	42.9602	117.007	-528956	17.5588	59.8124	3.634	59.9972	0.331308	13.3568	1.76533	0.00862703	8.29873	0.395177	1.85844	4.87774	6.74732	0.245404	2.11795	28.5
2000	1050	42.7567	116.443	-526394	17.4797	59.5155	3.637	60.0253	0.332733	13.3241	1.76994	0.00866809	8.31151	0.397058	1.83973	4.85573	6.76087	0.246413	2.12802	28.3
2000	1049	42.5551	115.884	-523854	17.4013	59.2213	3.64	60.0533	0.334159	13.2913	1.77454	0.00870916	8.32422	0.398939	1.82117	4.83383	6.77435	0.247421	2.13811	28
2000	1048	42.3553	115.33	-521338	17.3236	58.9299	3.643	60.0812	0.335585	13.2584	1.77914	0.00875024	8.33687	0.400821	1.80274	4.81206	6.78775	0.248428	2.14819	27.8
2000	1047	42.1573	114.781	-518845	17.2466	58.6412	3.646	60.109	0.337011	13.2256	1.78375	0.00879135	8.34945	0.402704	1.78446	4.79041	6.80108	0.249434	2.15829	27.6
2000	1046	41.961	114.236	-516374	17.1703	58.3551	3.649	60.1367	0.338437	13.1927	1.78836	0.00883247	8.36197	0.404588	1.76631	4.76888	6.81433	0.250438	2.16838	27.3
2000	1045	41.7664	113.697	-513926	17.0946	58.0716	3.651	60.1644	0.339864	13.1598	1.79296	0.00887361	8.37442	0.406472	1.74831	4.74746	6.82751	0.251442	2.17848	27.1
2000	1044	41.5736	113.162	-511499	17.0195	57.7906	3.654	60.1919	0.34129	13.1269	1.79757	0.00891477	8.3868	0.408357	1.73044	4.72616	6.84062	0.252444	2.18859	26.9
2000	1043	41.3825	112.631	-509093	16.9451	57.5122	3.657	60.2193	0.342717	13.094	1.80218	0.00895595	8.39912	0.410244	1.71271	4.70498	6.85365	0.253445	2.19869	26.6
2000	1042	41.193	112.105	-506709	16.8713	57.2363	3.659	60.2466	0.344144	13.061	1.8068	0.00899714	8.41138	0.412131	1.69512	4.68392	6.86661	0.254445	2.20881	26.4
2000	1041	41.0051	111.584	-504346	16.7981	56.9629	3.662	60.2739	0.345572	13.028	1.81141	0.00903836	8.42357	0.414019	1.67766	4.66297	6.8795	0.255444	2.21893	26.2
2000	1040	40.8179	111.065	-501995	16.7253	56.6905	3.664	60.3021	0.346926	12.9951	1.81589	0.00880347	8.43488	0.415918	1.66025	4.6421	6.89247	0.256448	2.22911	25.9
2000	1039	40.6321	110.55	-499664	16.653	56.4202	3.667	60.3304	0.348263	12.9622	1.82034	0.00853274	8.44598	0.41782	1.64297	4.62135	6.90539	0.257452	2.2393	25.7
2000	1038	40.4478	110.039	-497353	16.5814	56.1523	3.67	60.3587	0.349594	12.9292	1.82479	0.00826218	8.45698	0.419724	1.62582	4.60071	6.91825	0.258456	2.2495	25.5
2000	1037	40.2651	109.532	-495062	16.5103	55.8866	3.672	60.3869	0.35092	12.8962	1.82923	0.00799181	8.46788	0.421628	1.6088	4.58018	6.93105	0.259458	2.25971	25.3
2000	1036	40.0838	109.029	-492790	16.4398	55.6233	3.675	60.4151	0.35224	12.8632	1.83367	0.00772167	8.47868	0.423535	1.59192	4.55975	6.94378	0.260459	2.26993	25.1
2000	1035	39.9041	108.531	-490537	16.3698	55.3622	3.678	60.4432	0.353556	12.8302	1.83811	0.00745185	8.48939	0.425442	1.57515	4.53944	6.95644	0.26146	2.28015	24.8
2000	1034	39.7258	108.036	-488303	16.3005	55.1032	3.68	60.4713	0.354865	12.7972	1.84254	0.00718241	8.5	0.427351	1.55852	4.51924	6.96904	0.26246	2.29038	24.6
2000	1033	39.549	107.546	-486087	16.2316	54.8465	3.683	60.4993	0.356168	12.7641	1.84696	0.00691345	8.51051	0.429262	1.54201	4.49914	6.98158	0.263459	2.30062	24.4
2000	1032	39.3736	107.059	-483890	16.1633	54.5919	3.685	60.5272	0.357465	12.731	1.85138	0.00664507	8.52091	0.431174	1.52563	4.47915	6.99406	0.264457	2.31087	24.2
2000	1031	39.1996	106.577	-481711	16.0956	54.3394	3.688	60.5551	0.358755	12.6979	1.8558	0.0063774	8.53121	0.433088	1.50937	4.45926	7.00648	0.265455	2.32113	24
2000	1030	39.027	106.098	-479550	16.0284	54.089	3.69	60.583	0.360037	12.6648	1.86021	0.00611057	8.5414	0.435004	1.49323	4.43948	7.01883	0.266451	2.3314	23.7
2000	1029	38.8558	105.623	-477406	15.9617	53.8406	3.693	60.6109	0.361311	12.6317	1.86461	0.00584473	8.55149	0.436921	1.47722	4.4198	7.03113	0.267447	2.34167	23.5
2000	1028	38.6858	105.151	-475279	15.8955	53.5943	3.695	60.6387	0.362577	12.5985	1.86901	0.00558006	8.56146	0.43884	1.46133	4.40023	7.04337	0.268443	2.35196	23.3
2000	1027	38.5173	104.684	-473170	15.8298	53.35	3.697	60.6664	0.363833	12.5654	1.8734	0.00531675	8.57132	0.440761	1.44556	4.38075	7.05555	0.269437	2.36225	23.1
2000	1026	38.35	104.22	-471078	15.7646	53.1076	3.7	60.6942	0.36508	12.5322	1.87778	0.00505499	8.58107	0.442683	1.4299	4.36138	7.06767	0.270431	2.37255	22.9
2000	1025	38.184	103.759	-469002	15.6999	52.8671	3.702	60.7219	0.366317	12.499	1.88216	0.00479503	8.5907	0.444608	1.41437	4.34211	7.07974	0.271424	2.38287	22.7
2000	1024	38.0192	103.302	-466942	15.6357	52.6285	3.704	60.7496	0.367543	12.4658	1.88652	0.00453711	8.6002	0.446534	1.39895	4.32294	7.09175	0.272417	2.39319	22.5
2000	1023	37.8557	102.848	-464899	15.572	52.3918	3.707	60.7773	0.368757	12.4326	1.89088	0.00428151	8.60959	0.448463	1.38365	4.30387	7.10371	0.273409	2.40353	22.3
2000	1022	37.6935	102.398	-462871	15.5087	52.157	3.709	60.8049	0.369959	12.3994	1.89523	0.00402853	8.61885	0.450393	1.36847	4.28489	7.11561	0.274401	2.41388	22
2000	1021	37.5324	101.951	-460859	15.4459	51.9239	3.711	60.8326	0.371148	12.3661	1.89957	0.0037785	8.62798	0.452326	1.3534	4.26602	7.12746	0.275392	2.42423	21.8
2000	1020	37.3725	101.507	-458863	15.3836	51.6927	3.714	60.8602	0.372323	12.3329	1.9039	0.00353176	8.63698	0.454261	1.33845	4.24723	7.13926	0.276382	2.43461	21.6
2000	1019	37.2138	101.067	-456881	15.3217	51.4632	3.716	60.8878	0.373483	12.2996	1.90822	0.00328869	8.64585	0.456199	1.32361	4.22855	7.15101	0.277372	2.44499	21.4
2000	1018	37.0563	100.63	-454915	15.2602	51.2355	3.718	60.9155	0.374628	12.2663	1.91252	0.0030497	8.65458	0.458138	1.30888	4.20996	7.1627	0.278362	2.45538	21.2
2000	1017	36.8998	100.196	-452964	15.1992	51.0094	3.72	60.9431	0.375756	12.233	1.91682	0.00281523	8.66317	0.46008	1.29426	4.19146	7.17435	0.279351	2.46579	21
2000	1016	36.7445	99.7648	-451027	15.1387	50.785	3.722	60.9708	0.376867	12.1997	1.9211	0.00258574	8.67162	0.462025	1.27976	4.17306	7.18595	0.28034	2.47622	20.8
2000	1015	36.5903	99.3369	-449104	15.0785	50.5623	3.724	60.9984	0.377958	12.1664	1.92537	0.00236172	8.67992	0.463972	1.26537	4.15475	7.1975	0.281328	2.48665	20.6
2000	1014	36.4372	98.912	-447196	15.0188	50.3413	3.727	61.0261	0.37903	12.133	1.92963	0.0021437	8.68807	0.465922	1.25109	4.13653	7.20901	0.282316	2.4971	20.4
2000	1013	36.2851	98.4901	-445301	14.9595	50.1218	3.729	61.0538	0.38008	12.0997	1.93387	0.00193223	8.69606	0.467875	1.23691	4.1184	7.22047	0.283304	2.50757	20.2
2000	1012	36.1341	98.0711	-443420	14.9005	49.9039	3.731	61.0816	0.381108	12.0663	1.9381	0.00172791	8.7039	0.46983	1.22285	4.10037	7.23188	0.284291	2.51805	20
2000	1011	35.9841	97.6549	-441553	14.842	49.6876	3.733	61.1094	0.382112	12.0329	1.94231	0.00153135	8.71157	0.471788	1.20889	4.08242	7.24325	0.285279	2.52854	19.8
2000	1010	35.8352	97.2416	-439700	14.7839	49.4728	3.735	61.1372	0.383091	11.9996	1.94651	0.0013432	8.71907	0.473749	1.19504	4.06456	7.25458	0.286266	2.53905	19.6
2000	1009	35.6872	96.8311	-437859	14.7262	49.2595	3.737	61.165	0.384043	11.9662	1.95068	0.00116413	8.72639	0.475714	1.1813	4.04679	7.26587	0.287253	2.54958	19.4
2000	1008	35.5402	96.4232	-436031	14.6689	49.0477	3.739	61.193	0.384965	11.9327	1.95484	0.00099485	8.73354	0.477681	1.16767	4.02911	7.27711	0.28824	2.56013	19.2
2000	1007	35.3942	96.0181	-434216	14.6119	48.8373	3.741	61.221	0.385856	11.8993	1.95898	0.000836099	8.7405	0.479652	1.15414	4.01151	7.28832	0.289227	2.57069	19.1
2000	1006	35.2491	95.6156	-432414	14.5553	48.6284	3.743	61.249	0.386714	11.8659	1.96309	0.000688635	8.74726	0.481626	1.14072	3.994	7.29949	0.290214	2.58127	18.9
2000	1005	35.1049	95.2157	-430624	14.4991	48.4208	3.745	61.2772	0.387535	11.8324	1.96718	0.000553242	8.75381	0.483604	1.1274	3.97657	7.31063	0.291201	2.59187	18.7
2000	1004	34.9616	94.8183	-428846	14.4432	48.2147	3.747	61.3055	0.388316	11.799	1.97125	0.000430725	8.76014	0.485586	1.11419	3.95923	7.32173	0.292189	2.60249	18.5
2000	1003	34.8192	94.4234	-427080	14.3877	48.0098	3.749	61.3339	0.389052	11.7655	1.97528	0.000321907	8.76623	0.487572	1.10108	3.94197	7.3328	0.293176	2.61314	18.3
2000	1002	34.6777	94.0308	-425326	14.3325	47.8062	3.751	61.3624	0.389735	11.732	1.97928	0.000227621	8.77205	0.489563	1.08808	3.9248	7.34385	0.294165	2.6238	18.1
2000	1001	34.5369	93.6405	-423582	14.2776	47.6039	3.753	61.3912	0.390355	11.6985	1.98324	0.000148699	8.77756	0.491558	1.07519	3.9077	7.35487	0.295154	2.6345	17.9
2000	1000	34.3968	93.2521	-421849	14.223	47.4026	3.755	61.4203	0.390891	11.665	1.98714	8.59617e-05	8.78266	0.49356	1.0624	3.89068	7.36589	0.296145	2.64523	17.7
2000	999	34.2572	92.8653	-420125	14.1687	47.2021	3.757	61.45	0.391298	11.6315	1.99094	4.01725e-05	8.78716	0.495572	1.04971	3.87373	7.37693	0.297139	2.65601	17.6
2000	998	34.1175	92.4787	-418405	14.1145	47.0017	3.759	61.4809	0.391436	11.5979	1.99454	1.19269e-05	8.79046	0.4976	1.03715	3.85684	7.38808	0.298141	2.66688	17.4
2000	997	33.9839	92.1069	-416735	14.0619	46.8094	3.76	61.5053	0.392801	11.5644	1.99911	0	8.79915	0.499558	1.0246	3.84018	7.39841	0.299101	2.67737	17.2
2000	996	33.8177	91.6569	-414830	14.001	46.5742	3.765	61.5733	0.385856	11.5308	1.99709	0	8.77104	0.502012	1.0127	3.8226	7.4138	0.300332	2.69052	17.1
2000	995	33.6532	91.2113	-412943	13.9405	46.3413	3.77	61.641	0.379004	11.4971	1.99507	0	8.74296	0.504466	1.00092	3.80513	7.4291	0.301561	2.70368	16.9
2000	994	33.4903	90.7699	-411074	13.8807	46.1107	3.775	61.7086	0.372242	11.4634	1.99303	0	8.71491	0.50692	0.989268	3.78778	7.4443	0.302787	2.71683	16.8
2000	993	33.3289	90.3327	-409223	13.8214	45.8824	3.78	61.7759	0.365569	11.4296	1.99099	0	8.68689	0.509374	0.977736	3.77053	7.45941	0.304011	2.72998	16.7
2000	992	33.1691	89.8997	-407390	13.7626	45.6563	3.784	61.843	0.358986	11.3959	1.98893	0	8.6589	0.511828	0.966325	3.7534	7.47443	0.305233	2.74313	16.6
2000	991	33.0109	89.4707	-405574	13.7044	45.4325	3.789	61.9098	0.35249	11.3621	1.98687	0	8.63093	0.514282	0.955033	3.73639	7.48935	0.306452	2.75628	16.5
2000	990	32.8541	89.0458	-403776	13.6467	45.2108	3.794	61.9765	0.34608	11.3283	1.98479	0	8.60299	0.516735	0.94386	3.71948	7.50419	0.307669	2.76943	16.4
2000	989	32.6989	88.6248	-401994	13.5896	44.9912	3.798	62.043	0.339756	11.2944	1.98271	0	8.57506	0.519189	0.932803	3.70268	7.51894	0.308884	2.78258	16.2
2000	988	32.5451	88.2077	-400229	13.5329	44.7738	3.803	62.1092	0.333517	11.2606	1.98061	0	8.54716	0.521643	0.921861	3.68598	7.5336	0.310096	2.79573	16.1
2000	987	32.3927	87.7944	-398481	13.4768	44.5584	3.807	62.1752	0.327361	11.2267	1.9785	0	8.51928	0.524096	0.911034	3.66939	7.54818	0.311306	2.80889	16
2000	986	32.2417	87.3849	-396748	13.4211	44.345	3.812	62.2411	0.321288	11.1928	1.97638	0	8.49142	0.52655	0.900319	3.65291	7.56267	0.312514	2.82204	15.9
2000	985	32.0922	86.9791	-395032	13.3659	44.1337	3.816	62.3067	0.315296	11.1589	1.97425	0	8.46357	0.529004	0.889715	3.63653	7.57707	0.31372	2.83519	15.8
2000	984	31.944	86.577	-393331	13.3113	43.9243	3.821	62.3722	0.309385	11.125	1.9721	0	8.43574	0.531458	0.879221	3.62026	7.59139	0.314923	2.84834	15.7
2000	983	31.7971	86.1785	-391645	13.257	43.7169	3.825	62.4375	0.303554	11.091	1.96994	0	8.40792	0.533912	0.868836	3.60408	7.60563	0.316124	2.86149	15.6
2000	982	31.6516	85.7835	-389975	13.2033	43.5114	3.829	62.5026	0.297803	11.0571	1.96777	0	8.38011	0.536367	0.858558	3.58801	7.61979	0.317323	2.87465	15.4
2000	981	31.5075	85.3921	-388320	13.15	43.3078	3.834	62.5675	0.292129	11.0231	1.96559	0	8.3523	0.538821	0.848387	3.57204	7.63386	0.31852	2.8878	15.3
2000	980	31.3646	85.0041	-386679	13.0972	43.106	3.838	62.6322	0.286532	10.9891	1.96339	0	8.32451	0.541276	0.838321	3.55616	7.64785	0.319715	2.90096	15.2
2000	979	31.2229	84.6195	-385053	13.0449	42.9061	3.842	62.6967	0.281012	10.9551	1.96118	0	8.29672	0.543731	0.828359	3.54038	7.66177	0.320907	2.91412	15.1
2000	978	31.0826	84.2382	-383442	12.9929	42.708	3.846	62.7611	0.275568	10.9211	1.95895	0	8.26894	0.546187	0.8185	3.5247	7.6756	0.322097	2.92728	15
2000	977	30.9434	83.8603	-381844	12.9414	42.5117	3.85	62.8253	0.270198	10.887	1.95671	0	8.24116	0.548643	0.808743	3.50912	7.68935	0.323286	2.94044	14.9
2000	976	30.8055	83.4856	-380261	12.8904	42.3171	3.854	62.8893	0.264903	10.853	1.95445	0	8.21339	0.551099	0.799086	3.49363	7.70303	0.324472	2.9536	14.8
2000	975	30.6688	83.1142	-378691	12.8398	42.1243	3.858	62.9532	0.25968	10.8189	1.95218	0	8.18561	0.553555	0.789528	3.47823	7.71664	0.325656	2.96677	14.7
2000	974	30.5333	82.7459	-377135	12.7896	41.9331	3.862	63.0169	0.254531	10.7849	1.94989	0	8.15783	0.556012	0.78007	3.46293	7.73016	0.326838	2.97994	14.6
2000	973	30.399	82.3808	-375593	12.7398	41.7437	3.866	63.0805	0.249452	10.7508	1.94759	0	8.13005	0.558469	0.770708	3.44772	7.74361	0.328017	2.99311	14.5
2000	972	30.2658	82.0187	-374064	12.6904	41.5559	3.87	63.1439	0.244445	10.7167	1.94527	0	8.10226	0.560927	0.761443	3.4326	7.75699	0.329195	3.00628	14.3
2000	971	30.1337	81.6597	-372547	12.6414	41.3697	3.874	63.2071	0.239508	10.6826	1.94293	0	8.07447	0.563385	0.752274	3.41756	7.77029	0.330371	3.01945	14.2
2000	970	30.0028	81.3036	-371044	12.5928	41.1852	3.877	63.2702	0.23464	10.6485	1.94057	0	8.04667	0.565844	0.743199	3.40262	7.78352	0.331544	3.03263	14.1
2000	969	29.8729	80.9506	-369553	12.5446	41.0022	3.881	63.3332	0.229842	10.6144	1.9382	0	8.01886	0.568303	0.734217	3.38777	7.79668	0.332716	3.04581	14
2000	968	29.7442	80.6004	-368075	12.4968	40.8208	3.885	63.396	0.225111	10.5803	1.9358	0	7.99104	0.570763	0.725328	3.373	7.80977	0.333885	3.05899	13.9
2000	967	29.6166	80.2532	-366609	12.4494	40.6409	3.888	63.4586	0.220448	10.5462	1.93339	0	7.96321	0.573223	0.71653	3.35832	7.82278	0.335053	3.07218	13.8
2000	966	29.49	79.9087	-365156	12.4023	40.4626	3.892	63.5212	0.215851	10.5121	1.93096	0	7.93537	0.575684	0.707824	3.34373	7.83573	0.336218	3.08537	13.7
2000	965	29.3644	79.5671	-363714	12.3557	40.2858	3.896	63.5836	0.211321	10.478	1.92851	0	7.90751	0.578145	0.699206	3.32922	7.8486	0.337382	3.09856	13.6
2000	964	29.2399	79.2283	-362285	12.3094	40.1105	3.899	63.6458	0.206856	10.4438	1.92604	0	7.87963	0.580607	0.690678	3.31479	7.86141	0.338543	3.11175	13.5
2000	963	29.1164	78.8922	-360867	12.2634	39.9366	3.903	63.708	0.202455	10.4097	1.92355	0	7.85174	0.58307	0.682238	3.30045	7.87415	0.339703	3.12495	13.4
2000	962	28.9939	78.5587	-359461	12.2178	39.7642	3.906	63.77	0.198119	10.3756	1.92104	0	7.82383	0.585533	0.673885	3.28618	7.88683	0.34086	3.13815	13.3
2000	961	28.8724	78.228	-358066	12.1726	39.5932	3.91	63.8319	0.193847	10.3415	1.91851	0	7.79589	0.587997	0.665619	3.272	7.89943	0.342016	3.15136	13.2
2000	960	28.7519	77.8999	-356683	12.1277	39.4236	3.913	63.8936	0.189637	10.3073	1.91595	0	7.76794	0.590461	0.657437	3.2579	7.91197	0.343169	3.16457	13.1
2000	959	28.6324	77.5743	-355310	12.0832	39.2554	3.916	63.9553	0.185489	10.2732	1.91338	0	7.73996	0.592927	0.649341	3.24388	7.92445	0.344321	3.17778	13
2000	958	28.5138	77.2514	-353949	12.039	39.0885	3.92	64.0168	0.181404	10.2391	1.91078	0	7.71195	0.595393	0.641329	3.22994	7.93686	0.34547	3.191	12.9
2000	957	28.3961	76.9309	-352599	11.9951	38.923	3.923	64.0782	0.177379	10.2049	1.90815	0	7.68392	0.597859	0.6334	3.21608	7.94921	0.346618	3.20422	12.8
2000	956	28.2794	76.613	-351259	11.9516	38.7589	3.926	64.1396	0.173415	10.1708	1.90551	0	7.65586	0.600327	0.625553	3.20229	7.96149	0.347764	3.21744	12.7
2000	955	28.1636	76.2975	-349930	11.9084	38.5961	3.929	64.2008	0.169511	10.1367	1.90284	0	7.62776	0.602795	0.617788	3.18858	7.97371	0.348908	3.23067	12.6
2000	954	28.0487	75.9845	-348612	11.8655	38.4345	3.933	64.2619	0.165666	10.1025	1.90015	0	7.59964	0.605264	0.610103	3.17494	7.98587	0.350049	3.2439	12.5
2000	953	27.9347	75.6738	-347304	11.823	38.2743	3.936	64.3229	0.16188	10.0684	1.89743	0	7.57149	0.607734	0.6025	3.16138	7.99797	0.351189	3.25714	12.4
2000	952	27.8216	75.3656	-346006	11.7807	38.1153	3.939	64.3838	0.158153	10.0343	1.89469	0	7.54329	0.610204	0.594975	3.14789	8.01001	0.352327	3.27038	12.3
2000	951	27.7094	75.0597	-344719	11.7388	37.9576	3.942	64.4446	0.154483	10.0002	1.89192	0	7.51507	0.612676	0.587529	3.13448	8.02199	0.353464	3.28363	12.2
2000	950	27.5981	74.7561	-343441	11.6972	37.8011	3.945	64.5053	0.15087	9.9661	1.88912	0	7.4868	0.615148	0.580162	3.12114	8.0339	0.354598	3.29688	12.1
2000	949	27.4875	74.4548	-342173	11.6559	37.6458	3.948	64.5659	0.147314	9.932	1.8863	0	7.4585	0.617621	0.572872	3.10787	8.04576	0.35573	3.31013	12
2000	948	27.3779	74.1557	-340916	11.6149	37.4918	3.951	64.6264	0.143814	9.89791	1.88345	0	7.43016	0.620095	0.565659	3.09467	8.05756	0.356861	3.32339	11.9
2000	947	27.269	73.8589	-339667	11.5742	37.3389	3.954	64.6869	0.14037	9.86382	1.88057	0	7.40177	0.62257	0.558522	3.08154	8.0693	0.35799	3.33665	11.9
2000	946	27.161	73.5643	-338429	11.5338	37.1872	3.957	64.7472	0.136982	9.82974	1.87767	0	7.37334	0.625046	0.551461	3.06848	8.08099	0.359116	3.34992	11.8
2000	945	27.0538	73.2719	-337200	11.4937	37.0367	3.96	64.8075	0.133647	9.79567	1.87474	0	7.34486	0.627523	0.544475	3.05549	8.09262	0.360241	3.3632	11.7
2000	944	26.9474	72.9817	-335980	11.4539	36.8873	3.962	64.8677	0.130367	9.76161	1.87177	0	7.31634	0.63	0.537563	3.04257	8.10419	0.361364	3.37648	11.6
2000	943	26.8418	72.6936	-334769	11.4143	36.7391	3.965	64.9279	0.127141	9.72756	1.86878	0	7.28777	0.632479	0.530725	3.02971	8.11571	0.362485	3.38976	11.5
2000	942	26.737	72.4076	-333568	11.3751	36.592	3.968	64.9879	0.123968	9.69352	1.86576	0	7.25915	0.634958	0.52396	3.01692	8.12717	0.363605	3.40305	11.4
2000	941	26.633	72.1236	-332376	11.3361	36.446	3.971	65.0479	0.120847	9.65949	1.8627	0	7.23048	0.637438	0.517267	3.0042	8.13858	0.364722	3.41634	11.3
2000	940	26.5297	71.8418	-331192	11.2974	36.3011	3.974	65.1079	0.117779	9.62547	1.85962	0	7.20175	0.63992	0.510647	2.99154	8.14993	0.365838	3.42964	11.2
2000	939	26.4272	71.5619	-330018	11.259	36.1573	3.976	65.1677	0.114763	9.59146	1.8565	0	7.17297	0.642402	0.504098	2.97894	8.16123	0.366952	3.44294	11.1
2000	938	26.3254	71.2841	-328852	11.2208	36.0145	3.979	65.2275	0.111798	9.55746	1.85335	0	7.14413	0.644886	0.497621	2.96641	8.17248	0.368064	3.45625	11
2000	937	26.2244	71.0083	-327695	11.183	35.8728	3.982	65.2873	0.108884	9.52347	1.85017	0	7.11524	0.64737	0.491214	2.95394	8.18367	0.369174	3.46957	11
2000	936	26.1241	70.7344	-326546	11.1453	35.7321	3.984	65.347	0.106021	9.4895	1.84695	0	7.08628	0.649855	0.484876	2.94153	8.19482	0.370282	3.48289	10.9
2000	935	26.0245	70.4625	-325406	11.108	35.5925	3.987	65.4066	0.103207	9.45554	1.8437	0	7.05727	0.652342	0.478609	2.92919	8.20591	0.371389	3.49621	10.8
2000	934	25.9257	70.1925	-324275	11.0709	35.4539	3.989	65.4662	0.100443	9.4216	1.84042	0	7.02819	0.654829	0.47241	2.9169	8.21695	0.372494	3.50955	10.7
2000	933	25.8275	69.9245	-323151	11.034	35.3163	3.992	65.5258	0.0977284	9.38767	1.83709	0	6.99904	0.657318	0.46628	2.90468	8.22794	0.373596	3.52288	10.6
2000	932	25.6312	69.4226	-321065	10.9657	35.0448	4.001	65.6715	0.0987061	9.35758	1.81744	0	6.88942	0.647026	0.433881	2.89871	8.25993	0.375974	3.54987	10.1
2000	931	25.5317	69.1514	-319907	10.9279	34.9055	4.003	65.7253	0.0987558	9.322	1.81553	0	6.866	0.645436	0.425769	2.89015	8.27022	0.377095	3.5637	10
2000	930	25.4278	68.8701	-318740	10.8895	34.7607	4.007	65.7948	0.0969168	9.28588	1.81036	0	6.82806	0.644672	0.419116	2.88192	8.28176	0.378286	3.57826	9.9
2000	929	25.3247	68.5911	-317582	10.8513	34.617	4.01	65.864	0.09511	9.24977	1.80517	0	6.79018	0.643901	0.412543	2.87375	8.29326	0.379475	3.59283	9.8
2000	928	25.2224	68.3142	-316433	10.8133	34.4746	4.013	65.9331	0.093335	9.21368	1.79996	0	6.75237	0.643122	0.406051	2.86562	8.3047	0.380662	3.6074	9.7
2000	927	25.121	68.0394	-315294	10.7757	34.3333	4.016	66.002	0.0915912	9.17761	1.79473	0	6.71462	0.642337	0.399637	2.85755	8.31609	0.381846	3.62197	9.6
2000	926	25.0203	67.7668	-314163	10.7384	34.1931	4.019	66.0708	0.0898783	9.14155	1.78947	0	6.67693	0.641544	0.393302	2.84953	8.32743	0.383029	3.63654	9.5
2000	925	24.9205	67.4963	-313041	10.7013	34.0541	4.022	66.1394	0.0881957	9.10552	1.78419	0	6.63932	0.640744	0.387045	2.84156	8.33872	0.384209	3.65111	9.4
2000	924	24.8214	67.2279	-311927	10.6645	33.9161	4.025	66.2078	0.086543	9.0695	1.77889	0	6.60177	0.639937	0.380866	2.83365	8.34996	0.385388	3.66568	9.3
2000	923	24.7231	66.9616	-310823	10.628	33.7793	4.028	66.2761	0.0849198	9.03349	1.77358	0	6.56429	0.639124	0.374763	2.82578	8.36115	0.386564	3.68026	9.2
2000	922	24.6256	66.6973	-309727	10.5917	33.6436	4.031	66.3442	0.0833256	8.99751	1.76824	0	6.52689	0.638305	0.368735	2.81797	8.37229	0.387738	3.69483	9.1
2000	921	24.5289	66.4351	-308639	10.5558	33.5089	4.034	66.4121	0.0817599	8.96154	1.76288	0	6.48956	0.637479	0.362783	2.81021	8.38338	0.388909	3.7094	9.1
2000	920	24.4329	66.1749	-307560	10.5201	33.3753	4.037	66.4799	0.0802223	8.92559	1.7575	0	6.45231	0.636647	0.356906	2.8025	8.39442	0.390078	3.72397	9
2000	919	24.3376	65.9167	-306489	10.4846	33.2428	4.039	66.5474	0.0787124	8.88966	1.7521	0	6.41513	0.635808	0.351102	2.79485	8.40541	0.391245	3.73854	8.9
2000	918	24.2432	65.6604	-305427	10.4494	33.1114	4.042	66.6148	0.0772298	8.85375	1.74669	0	6.37804	0.634964	0.345372	2.78724	8.41635	0.39241	3.75311	8.8
2000	917	24.1494	65.4062	-304372	10.4145	32.9809	4.045	66.6821	0.075774	8.81786	1.74125	0	6.34102	0.634115	0.339714	2.77968	8.42724	0.393573	3.76768	8.7
2000	916	24.0564	65.1538	-303326	10.3798	32.8516	4.047	66.7492	0.0743447	8.78199	1.7358	0	6.30409	0.633259	0.334128	2.77217	8.43807	0.394733	3.78225	8.6
2000	915	23.9641	64.9034	-302288	10.3454	32.7232	4.05	66.8161	0.0729413	8.74614	1.73033	0	6.26723	0.632399	0.328614	2.76472	8.44886	0.39589	3.79681	8.5
2000	914	23.8726	64.6549	-301258	10.3113	32.5958	4.053	66.8828	0.0715636	8.71031	1.72484	0	6.23047	0.631532	0.32317	2.75731	8.4596	0.397045	3.81138	8.5
2000	913	23.7817	64.4082	-300235	10.2773	32.4695	4.055	66.9493	0.070211	8.6745	1.71934	0	6.19379	0.630661	0.317796	2.74996	8.47029	0.398198	3.82594	8.4
2000	912	23.6916	64.1635	-299220	10.2437	32.3441	4.058	67.0157	0.0688833	8.63871	1.71382	0	6.1572	0.629785	0.312491	2.74265	8.48093	0.399348	3.8405	8.3
2000	911	23.6021	63.9206	-298214	10.2103	32.2197	4.06	67.0819	0.0675799	8.60294	1.70828	0	6.12069	0.628903	0.307255	2.73539	8.49152	0.400496	3.85505	8.2
2000	910	23.5134	63.6795	-297214	10.1771	32.0963	4.062	67.1479	0.0663006	8.5672	1.70273	0	6.08428	0.628017	0.302087	2.72818	8.50206	0.401641	3.8696	8.1
2000	909	23.4253	63.4402	-296223	10.1442	31.9739	4.065	67.2138	0.065045	8.53147	1.69716	0	6.04796	0.627126	0.296986	2.72102	8.51254	0.402784	3.88415	8
2000	908	23.3379	63.2027	-295238	10.1115	31.8524	4.067	67.2794	0.0638126	8.49577	1.69158	0	6.01173	0.626231	0.291952	2.71391	8.52298	0.403924	3.89869	8
2000	907	23.2512	62.9671	-294262	10.079	31.7318	4.069	67.3449	0.0626031	8.46009	1.68598	0	5.97559	0.625331	0.286984	2.70685	8.53337	0.405062	3.91323	7.9
2000	906	23.1652	62.7331	-293292	10.0468	31.6122	4.072	67.4102	0.0614161	8.42443	1.68037	0	5.93956	0.624426	0.282082	2.69984	8.54371	0.406197	3.92777	7.8
2000	905	23.0798	62.501	-292330	10.0148	31.4935	4.074	67.4753	0.0602513	8.3888	1.67474	0	5.90361	0.623518	0.277244	2.69287	8.554	0.40733	3.9423	7.7
2000	904	22.9951	62.2705	-291375	9.98303	31.3758	4.076	67.5403	0.0591084	8.35319	1.6691	0	5.86777	0.622605	0.272471	2.68595	8.56423	0.408459	3.95682	7.6
2000	903	22.911	62.0418	-290428	9.9515	31.2589	4.078	67.605	0.0579868	8.31761	1.66345	0	5.83203	0.621688	0.267761	2.67908	8.57442	0.409586	3.97134	7.6
2000	902	22.8276	61.8148	-289487	9.9202	31.143	4.08	67.6696	0.0568864	8.28205	1.65778	0	5.79639	0.620768	0.263114	2.67226	8.58456	0.410711	3.98585	7.5
2000	901	22.7448	61.5894	-288554	9.88912	31.0279	4.082	67.734	0.0558067	8.24652	1.65211	0	5.76085	0.619843	0.25853	2.66549	8.59465	0.411832	4.00036	7.4
2000	900	22.6626	61.3658	-287627	9.85826	30.9138	4.084	67.7982	0.0547474	8.21101	1.64642	0	5.72541	0.618915	0.254007	2.65876	8.60468	0.412951	4.01486	7.3
spinel_0	thermodynamic	data	and	composition:
Pressure	Temperature	mass	S	H	V	Cp	formula	SiO2	TiO2	Al2O3	Fe2O3	Cr2O3	FeO	MnO	MgO	CaO	Na2O	K2O	H2O
2000	1040	0.000719	0.001467	-4.14304	0.000152	0.000662	Fe''0.93Mg0.19Fe'''0.98Al0.34Cr0.44Ti0.12O4	0	4.53801	8.17243	36.5928	15.6809	31.4638	0	3.55204	0	0	0	0
2000	1039	0.001561	0.003183	-8.96161	0.000329	0.001435	Fe''0.94Mg0.19Fe'''0.98Al0.34Cr0.43Ti0.12O4	0	4.65795	8.0494	36.8523	15.3175	31.6131	0	3.50981	0	0	0	0
2000	1038	0.001862	0.003794	-10.6486	0.000393	0.001711	Fe''0.94Mg0.18Fe'''0.99Al0.33Cr0.42Ti0.13O4	0	4.78127	7.92615	37.1093	14.9506	31.7647	0	3.46802	0	0	0	0
2000	1037	0.001876	0.003821	-10.6918	0.000395	0.001723	Fe''0.95Mg0.18Fe'''1.00Al0.33Cr0.41Ti0.13O4	0	4.90804	7.80276	37.3635	14.5803	31.9188	0	3.42667	0	0	0	0
2000	1036	0.00189	0.00385	-10.7395	0.000398	0.001735	Fe''0.96Mg0.18Fe'''1.01Al0.32Cr0.40Ti0.13O4	0	5.03828	7.67931	37.6144	14.2069	32.0753	0	3.38577	0	0	0	0
2000	1035	0.001906	0.003881	-10.7921	0.000401	0.001749	Fe''0.96Mg0.18Fe'''1.02Al0.32Cr0.39Ti0.14O4	0	5.17204	7.5559	37.8618	13.8306	32.2344	0	3.34533	0	0	0	0
2000	1034	0.001923	0.003913	-10.8496	0.000405	0.001763	Fe''0.97Mg0.18Fe'''1.02Al0.31Cr0.38Ti0.14O4	0	5.30932	7.43261	38.1051	13.4516	32.396	0	3.30535	0	0	0	0
2000	1033	0.00194	0.003948	-10.9123	0.000408	0.001778	Fe''0.97Mg0.17Fe'''1.03Al0.31Cr0.37Ti0.15O4	0	5.45014	7.30953	38.344	13.0702	32.5602	0	3.26586	0	0	0	0
2000	1032	0.001959	0.003984	-10.9804	0.000412	0.001795	Fe''0.98Mg0.17Fe'''1.04Al0.30Cr0.36Ti0.15O4	0	5.59451	7.18675	38.5782	12.6868	32.7269	0	3.22686	0	0	0	0
2000	1031	0.001978	0.004022	-11.054	0.000416	0.001812	Fe''0.98Mg0.17Fe'''1.04Al0.30Cr0.35Ti0.15O4	0	5.7424	7.06438	38.8072	12.3014	32.8962	0	3.18836	0	0	0	0
2000	1030	0.001999	0.004063	-11.1333	0.00042	0.00183	Fe''0.99Mg0.17Fe'''1.05Al0.29Cr0.34Ti0.16O4	0	5.89381	6.9425	39.0307	11.9146	33.068	0	3.15036	0	0	0	0
2000	1029	0.002021	0.004105	-11.2186	0.000424	0.001849	Fe''1.00Mg0.17Fe'''1.06Al0.29Cr0.33Ti0.16O4	0	6.0487	6.82121	39.2484	11.5264	33.2424	0	3.11287	0	0	0	0
2000	1028	0.002043	0.00415	-11.3101	0.000429	0.001869	Fe''1.00Mg0.16Fe'''1.07Al0.28Cr0.32Ti0.17O4	0	6.20704	6.7006	39.4599	11.1373	33.4193	0	3.0759	0	0	0	0
2000	1027	0.002067	0.004198	-11.408	0.000434	0.001891	Fe''1.01Mg0.16Fe'''1.07Al0.28Cr0.31Ti0.17O4	0	6.36878	6.58075	39.6648	10.7475	33.5987	0	3.03945	0	0	0	0
2000	1026	0.002093	0.004247	-11.5125	0.000439	0.001913	Fe''1.02Mg0.16Fe'''1.08Al0.27Cr0.29Ti0.18O4	0	6.53385	6.46177	39.863	10.3574	33.7805	0	3.00352	0	0	0	0
2000	1025	0.002119	0.0043	-11.6238	0.000445	0.001937	Fe''1.02Mg0.16Fe'''1.08Al0.27Cr0.28Ti0.18O4	0	6.70219	6.34373	40.0542	9.96712	33.9647	0	2.96813	0	0	0	0
2000	1024	0.002147	0.004355	-11.7423	0.00045	0.001961	Fe''1.03Mg0.16Fe'''1.09Al0.26Cr0.27Ti0.19O4	0	6.87372	6.22672	40.238	9.57709	34.1512	0	2.93326	0	0	0	0
2000	1023	0.002176	0.004412	-11.868	0.000456	0.001988	Fe''1.04Mg0.16Fe'''1.10Al0.26Cr0.26Ti0.19O4	0	7.04833	6.11082	40.4144	9.18756	34.34	0	2.89892	0	0	0	0
2000	1022	0.002207	0.004472	-12.0013	0.000462	0.002015	Fe''1.04Mg0.15Fe'''1.10Al0.25Cr0.25Ti0.20O4	0	7.22593	5.9961	40.5831	8.79883	34.5309	0	2.86511	0	0	0	0
2000	1021	0.002239	0.004536	-12.1425	0.000469	0.002044	Fe''1.05Mg0.15Fe'''1.11Al0.25Cr0.24Ti0.20O4	0	7.4064	5.88263	40.7439	8.41117	34.724	0	2.83183	0	0	0	0
2000	1020	0.002273	0.004602	-12.2918	0.000476	0.002074	Fe''1.06Mg0.15Fe'''1.11Al0.25Cr0.23Ti0.21O4	0	7.58962	5.7705	40.8969	8.02487	34.9191	0	2.79907	0	0	0	0
2000	1019	0.002308	0.004671	-12.4496	0.000483	0.002105	Fe''1.06Mg0.15Fe'''1.12Al0.24Cr0.22Ti0.21O4	0	7.77545	5.65975	41.0417	7.64019	35.1161	0	2.76684	0	0	0	0
2000	1018	0.002344	0.004744	-12.616	0.000491	0.002139	Fe''1.07Mg0.15Fe'''1.12Al0.24Cr0.21Ti0.22O4	0	7.96375	5.55046	41.1785	7.25739	35.3148	0	2.73511	0	0	0	0
2000	1017	0.002383	0.004819	-12.7916	0.000499	0.002173	Fe''1.08Mg0.15Fe'''1.13Al0.23Cr0.20Ti0.22O4	0	8.15436	5.44268	41.3071	6.87673	35.5152	0	2.7039	0	0	0	0
2000	1016	0.002423	0.004899	-12.9767	0.000507	0.00221	Fe''1.08Mg0.14Fe'''1.13Al0.23Cr0.19Ti0.23O4	0	8.34712	5.33646	41.4276	6.49844	35.7172	0	2.67319	0	0	0	0
2000	1015	0.002465	0.004982	-13.1718	0.000516	0.002248	Fe''1.09Mg0.14Fe'''1.13Al0.22Cr0.18Ti0.23O4	0	8.54187	5.23185	41.54	6.12276	35.9206	0	2.64298	0	0	0	0
2000	1014	0.002509	0.005069	-13.3774	0.000525	0.002287	Fe''1.10Mg0.14Fe'''1.14Al0.22Cr0.17Ti0.24O4	0	8.73841	5.1289	41.6443	5.74991	36.1252	0	2.61325	0	0	0	0
2000	1013	0.002556	0.00516	-13.5941	0.000534	0.002329	Fe''1.10Mg0.14Fe'''1.14Al0.22Cr0.15Ti0.24O4	0	8.93658	5.02764	41.7408	5.38009	36.3309	0	2.584	0	0	0	0
2000	1012	0.002604	0.005255	-13.8227	0.000544	0.002373	Fe''1.11Mg0.14Fe'''1.14Al0.21Cr0.14Ti0.25O4	0	9.13618	4.92811	41.8293	5.01351	36.5376	0	2.55521	0	0	0	0
2000	1011	0.002655	0.005355	-14.0642	0.000555	0.002419	Fe''1.12Mg0.14Fe'''1.15Al0.21Cr0.13Ti0.26O4	0	9.33701	4.83035	41.9102	4.65036	36.7451	0	2.52689	0	0	0	0
2000	1010	0.002708	0.00546	-14.3199	0.000566	0.002468	Fe''1.13Mg0.14Fe'''1.15Al0.20Cr0.12Ti0.26O4	0	9.53887	4.73437	41.9836	4.29082	36.9533	0	2.49902	0	0	0	0
2000	1009	0.002765	0.005572	-14.5915	0.000578	0.002519	Fe''1.13Mg0.13Fe'''1.15Al0.20Cr0.11Ti0.27O4	0	9.74155	4.6402	42.0497	3.93505	37.1619	0	2.47158	0	0	0	0
2000	1008	0.002825	0.00569	-14.8812	0.00059	0.002573	Fe''1.14Mg0.13Fe'''1.16Al0.20Cr0.10Ti0.27O4	0	9.94484	4.54787	42.1087	3.58322	37.3708	0	2.44457	0	0	0	0
2000	1007	0.002889	0.005816	-15.1923	0.000603	0.002631	Fe''1.15Mg0.13Fe'''1.16Al0.19Cr0.09Ti0.28O4	0	10.1485	4.4574	42.1608	3.23549	37.5798	0	2.41798	0	0	0	0
2000	1006	0.002958	0.005951	-15.5293	0.000618	0.002694	Fe''1.15Mg0.13Fe'''1.16Al0.19Cr0.08Ti0.28O4	0	10.3523	4.3688	42.2063	2.89202	37.7888	0	2.39179	0	0	0	0
2000	1005	0.003033	0.0061	-15.8993	0.000633	0.002762	Fe''1.16Mg0.13Fe'''1.16Al0.18Cr0.07Ti0.29O4	0	10.556	4.28209	42.2455	2.55297	37.9974	0	2.36599	0	0	0	0
2000	1004	0.003117	0.006265	-16.3132	0.000651	0.002839	Fe''1.17Mg0.13Fe'''1.16Al0.18Cr0.06Ti0.30O4	0	10.7594	4.19728	42.2788	2.21853	38.2055	0	2.34057	0	0	0	0
2000	1003	0.003213	0.006453	-16.7889	0.00067	0.002926	Fe''1.18Mg0.13Fe'''1.16Al0.18Cr0.05Ti0.30O4	0	10.962	4.11442	42.3064	1.88892	38.4127	0	2.31553	0	0	0	0
2000	1002	0.003327	0.006677	-17.3583	0.000694	0.003029	Fe''1.18Mg0.13Fe'''1.17Al0.17Cr0.05Ti0.31O4	0	11.1635	4.03354	42.3289	1.56441	38.6188	0	2.29085	0	0	0	0
2000	1001	0.00347	0.006961	-18.0836	0.000724	0.00316	Fe''1.19Mg0.12Fe'''1.17Al0.17Cr0.04Ti0.31O4	0	11.3633	3.9547	42.3468	1.24547	38.8233	0	2.26651	0	0	0	0
2000	1000	0.003671	0.007358	-19.1025	0.000766	0.003342	Fe''1.20Mg0.12Fe'''1.17Al0.17Cr0.03Ti0.32O4	0	11.5605	3.87806	42.3608	0.932883	39.0252	0	2.24252	0	0	0	0
2000	999	0.004	0.008011	-20.7884	0.000834	0.003641	Fe''1.20Mg0.12Fe'''1.17Al0.16Cr0.02Ti0.32O4	0	11.7531	3.80397	42.3725	0.628429	39.2231	0	2.21886	0	0	0	0
2000	998	0.004732	0.00947	-24.5641	0.000987	0.004308	Fe''1.21Mg0.12Fe'''1.17Al0.16Cr0.01Ti0.33O4	0	11.9356	3.73357	42.3859	0.337651	39.4117	0	2.19555	0	0	0	0
2000	997	0.001067	0.002134	-5.53504	0.000223	0.000972	Fe''1.22Mg0.12Fe'''1.17Al0.16Cr0.00Ti0.34O4	0	12.1671	3.65403	42.363	0	39.6435	0	2.17235	0	0	0	0
2000	996	0.025313	0.050569	-131.062	0.005277	0.023038	Fe''1.22Mg0.12Fe'''1.18Al0.16Cr0.00Ti0.33O4	0	12.067	3.6461	42.5537	0	39.5826	0	2.15052	0	0	0	0
2000	995	0.025031	0.049974	-129.41	0.005216	0.022776	Fe''1.21Mg0.12Fe'''1.18Al0.16Cr0.00Ti0.33O4	0	11.9668	3.63827	42.7447	0	39.5213	0	2.12891	0	0	0	0
2000	994	0.024754	0.04939	-127.792	0.005157	0.02252	Fe''1.21Mg0.12Fe'''1.19Al0.16Cr0.00Ti0.33O4	0	11.8664	3.63054	42.936	0	39.4595	0	2.10753	0	0	0	0
2000	993	0.024483	0.048818	-126.207	0.005099	0.022268	Fe''1.21Mg0.11Fe'''1.19Al0.16Cr0.00Ti0.33O4	0	11.7659	3.62291	43.1276	0	39.3972	0	2.08637	0	0	0	0
2000	992	0.024218	0.048257	-124.655	0.005041	0.022022	Fe''1.21Mg0.11Fe'''1.20Al0.16Cr0.00Ti0.32O4	0	11.6652	3.61539	43.3194	0	39.3345	0	2.06543	0	0	0	0
2000	991	0.023957	0.047708	-123.133	0.004985	0.02178	Fe''1.21Mg0.11Fe'''1.20Al0.16Cr0.00Ti0.32O4	0	11.5644	3.60796	43.5115	0	39.2714	0	2.04471	0	0	0	0
2000	990	0.023702	0.047168	-121.642	0.004931	0.021544	Fe''1.21Mg0.11Fe'''1.21Al0.16Cr0.00Ti0.32O4	0	11.4635	3.60063	43.7038	0	39.2078	0	2.02421	0	0	0	0
2000	989	0.023452	0.04664	-120.181	0.004877	0.021311	Fe''1.20Mg0.11Fe'''1.22Al0.16Cr0.00Ti0.31O4	0	11.3625	3.59341	43.8964	0	39.1438	0	2.00391	0	0	0	0
2000	988	0.023206	0.046121	-118.749	0.004824	0.021084	Fe''1.20Mg0.11Fe'''1.22Al0.16Cr0.00Ti0.31O4	0	11.2613	3.58628	44.0892	0	39.0794	0	1.98383	0	0	0	0
2000	987	0.022965	0.045613	-117.345	0.004772	0.02086	Fe''1.20Mg0.11Fe'''1.23Al0.16Cr0.00Ti0.31O4	0	11.16	3.57925	44.2822	0	39.0146	0	1.96395	0	0	0	0
2000	986	0.022729	0.045114	-115.969	0.004721	0.020641	Fe''1.20Mg0.11Fe'''1.23Al0.16Cr0.00Ti0.31O4	0	11.0586	3.57231	44.4755	0	38.9493	0	1.94428	0	0	0	0
2000	985	0.022497	0.044625	-114.62	0.004672	0.020427	Fe''1.20Mg0.11Fe'''1.24Al0.15Cr0.00Ti0.30O4	0	10.9571	3.56547	44.6689	0	38.8837	0	1.92481	0	0	0	0
2000	984	0.02227	0.044145	-113.298	0.004623	0.020216	Fe''1.20Mg0.10Fe'''1.24Al0.15Cr0.00Ti0.30O4	0	10.8555	3.55873	44.8625	0	38.8177	0	1.90555	0	0	0	0
2000	983	0.022047	0.043674	-112.001	0.004575	0.020009	Fe''1.19Mg0.10Fe'''1.25Al0.15Cr0.00Ti0.30O4	0	10.7538	3.55208	45.0563	0	38.7513	0	1.88649	0	0	0	0
2000	982	0.021828	0.043212	-110.73	0.004528	0.019807	Fe''1.19Mg0.10Fe'''1.26Al0.15Cr0.00Ti0.30O4	0	10.652	3.54552	45.2503	0	38.6845	0	1.86762	0	0	0	0
2000	981	0.021613	0.042759	-109.484	0.004482	0.019608	Fe''1.19Mg0.10Fe'''1.26Al0.15Cr0.00Ti0.29O4	0	10.5502	3.53906	45.4445	0	38.6174	0	1.84895	0	0	0	0
2000	980	0.021402	0.042315	-108.261	0.004437	0.019413	Fe''1.19Mg0.10Fe'''1.27Al0.15Cr0.00Ti0.29O4	0	10.4482	3.53269	45.6388	0	38.5499	0	1.83047	0	0	0	0
2000	979	0.021196	0.041879	-107.063	0.004392	0.019221	Fe''1.19Mg0.10Fe'''1.27Al0.15Cr0.00Ti0.29O4	0	10.3462	3.52641	45.8333	0	38.482	0	1.81219	0	0	0	0
2000	978	0.020993	0.04145	-105.887	0.004349	0.019034	Fe''1.19Mg0.10Fe'''1.28Al0.15Cr0.00Ti0.28O4	0	10.244	3.52022	46.0279	0	38.4138	0	1.79409	0	0	0	0
2000	977	0.020794	0.04103	-104.734	0.004306	0.018849	Fe''1.18Mg0.10Fe'''1.28Al0.15Cr0.00Ti0.28O4	0	10.1418	3.51412	46.2226	0	38.3452	0	1.77618	0	0	0	0
2000	976	0.020599	0.040618	-103.603	0.004264	0.018669	Fe''1.18Mg0.10Fe'''1.29Al0.15Cr0.00Ti0.28O4	0	10.0396	3.50811	46.4175	0	38.2764	0	1.75846	0	0	0	0
2000	975	0.020407	0.040214	-102.494	0.004223	0.018491	Fe''1.18Mg0.10Fe'''1.30Al0.15Cr0.00Ti0.28O4	0	9.93725	3.50219	46.6125	0	38.2072	0	1.74092	0	0	0	0
2000	974	0.020219	0.039817	-101.407	0.004183	0.018317	Fe''1.18Mg0.09Fe'''1.30Al0.15Cr0.00Ti0.27O4	0	9.83487	3.49635	46.8076	0	38.1376	0	1.72357	0	0	0	0
2000	973	0.020034	0.039427	-100.339	0.004144	0.018146	Fe''1.18Mg0.09Fe'''1.31Al0.15Cr0.00Ti0.27O4	0	9.73244	3.4906	47.0028	0	38.0678	0	1.70639	0	0	0	0
2000	972	0.019853	0.039045	-99.2928	0.004105	0.017979	Fe''1.17Mg0.09Fe'''1.31Al0.15Cr0.00Ti0.27O4	0	9.62995	3.48494	47.1981	0	37.9977	0	1.68939	0	0	0	0
2000	971	0.019675	0.03867	-98.2661	0.004067	0.017814	Fe''1.17Mg0.09Fe'''1.32Al0.15Cr0.00Ti0.26O4	0	9.52743	3.47936	47.3934	0	37.9272	0	1.67257	0	0	0	0
2000	970	0.019501	0.038301	-97.2589	0.004029	0.017653	Fe''1.17Mg0.09Fe'''1.32Al0.15Cr0.00Ti0.26O4	0	9.42486	3.47386	47.5889	0	37.8565	0	1.65593	0	0	0	0
2000	969	0.01933	0.03794	-96.2709	0.003993	0.017495	Fe''1.17Mg0.09Fe'''1.33Al0.15Cr0.00Ti0.26O4	0	9.32226	3.46845	47.7844	0	37.7855	0	1.63945	0	0	0	0
2000	968	0.019162	0.037585	-95.3017	0.003957	0.017339	Fe''1.17Mg0.09Fe'''1.34Al0.15Cr0.00Ti0.26O4	0	9.21963	3.46312	47.9799	0	37.7142	0	1.62315	0	0	0	0
2000	967	0.018997	0.037237	-94.3509	0.003921	0.017187	Fe''1.17Mg0.09Fe'''1.34Al0.15Cr0.00Ti0.25O4	0	9.11698	3.45787	48.1755	0	37.6426	0	1.60702	0	0	0	0
2000	966	0.018835	0.036895	-93.4182	0.003887	0.017037	Fe''1.16Mg0.09Fe'''1.35Al0.15Cr0.00Ti0.25O4	0	9.0143	3.4527	48.3711	0	37.5708	0	1.59106	0	0	0	0
2000	965	0.018677	0.03656	-92.5032	0.003853	0.01689	Fe''1.16Mg0.09Fe'''1.35Al0.15Cr0.00Ti0.25O4	0	8.91162	3.44761	48.5668	0	37.4987	0	1.57526	0	0	0	0
2000	964	0.018521	0.036231	-91.6056	0.00382	0.016746	Fe''1.16Mg0.09Fe'''1.36Al0.15Cr0.00Ti0.25O4	0	8.80893	3.44259	48.7625	0	37.4264	0	1.55962	0	0	0	0
2000	963	0.018368	0.035908	-90.7251	0.003787	0.016605	Fe''1.16Mg0.09Fe'''1.36Al0.15Cr0.00Ti0.24O4	0	8.70623	3.43765	48.9581	0	37.3538	0	1.54415	0	0	0	0
2000	962	0.018218	0.035591	-89.8614	0.003755	0.016466	Fe''1.16Mg0.08Fe'''1.37Al0.15Cr0.00Ti0.24O4	0	8.60354	3.43279	49.1538	0	37.281	0	1.52884	0	0	0	0
2000	961	0.018071	0.03528	-89.0142	0.003723	0.01633	Fe''1.15Mg0.08Fe'''1.38Al0.15Cr0.00Ti0.24O4	0	8.50086	3.428	49.3494	0	37.208	0	1.51369	0	0	0	0
2000	960	0.017927	0.034975	-88.1831	0.003692	0.016197	Fe''1.15Mg0.08Fe'''1.38Al0.15Cr0.00Ti0.23O4	0	8.39819	3.42328	49.545	0	37.1348	0	1.4987	0	0	0	0
2000	959	0.017785	0.034675	-87.3679	0.003662	0.016066	Fe''1.15Mg0.08Fe'''1.39Al0.15Cr0.00Ti0.23O4	0	8.29555	3.41863	49.7406	0	37.0614	0	1.48386	0	0	0	0
2000	958	0.017646	0.034381	-86.5684	0.003632	0.015937	Fe''1.15Mg0.08Fe'''1.39Al0.15Cr0.00Ti0.23O4	0	8.19293	3.41406	49.9361	0	36.9877	0	1.46918	0	0	0	0
2000	957	0.01751	0.034093	-85.7842	0.003603	0.015811	Fe''1.15Mg0.08Fe'''1.40Al0.15Cr0.00Ti0.23O4	0	8.09034	3.40955	50.1316	0	36.9139	0	1.45466	0	0	0	0
2000	956	0.017377	0.03381	-85.0152	0.003575	0.015688	Fe''1.14Mg0.08Fe'''1.41Al0.15Cr0.00Ti0.22O4	0	7.9878	3.40511	50.3269	0	36.8399	0	1.44028	0	0	0	0
2000	955	0.017246	0.033532	-84.261	0.003547	0.015567	Fe''1.14Mg0.08Fe'''1.41Al0.15Cr0.00Ti0.22O4	0	7.88531	3.40074	50.5222	0	36.7657	0	1.42605	0	0	0	0
2000	954	0.017117	0.03326	-83.5214	0.003519	0.015448	Fe''1.14Mg0.08Fe'''1.42Al0.15Cr0.00Ti0.22O4	0	7.78287	3.39643	50.7174	0	36.6913	0	1.41198	0	0	0	0
2000	953	0.016991	0.032993	-82.7961	0.003492	0.015331	Fe''1.14Mg0.08Fe'''1.42Al0.15Cr0.00Ti0.21O4	0	7.6805	3.39218	50.9125	0	36.6168	0	1.39805	0	0	0	0
2000	952	0.016868	0.032731	-82.085	0.003466	0.015217	Fe''1.14Mg0.08Fe'''1.43Al0.15Cr0.00Ti0.21O4	0	7.57819	3.38799	51.1074	0	36.5421	0	1.38426	0	0	0	0
2000	951	0.016747	0.032474	-81.3879	0.00344	0.015105	Fe''1.13Mg0.08Fe'''1.43Al0.15Cr0.00Ti0.21O4	0	7.47596	3.38387	51.3022	0	36.4673	0	1.37062	0	0	0	0
2000	950	0.016628	0.032222	-80.7044	0.003415	0.014995	Fe''1.13Mg0.08Fe'''1.44Al0.15Cr0.00Ti0.21O4	0	7.37382	3.3798	51.4969	0	36.3924	0	1.35713	0	0	0	0
2000	949	0.016512	0.031975	-80.0345	0.00339	0.014888	Fe''1.13Mg0.07Fe'''1.45Al0.15Cr0.00Ti0.20O4	0	7.27178	3.37578	51.6913	0	36.3173	0	1.34377	0	0	0	0
2000	948	0.016398	0.031733	-79.3779	0.003366	0.014782	Fe''1.13Mg0.07Fe'''1.45Al0.15Cr0.00Ti0.20O4	0	7.16983	3.37183	51.8856	0	36.2422	0	1.33056	0	0	0	0
2000	947	0.016287	0.031496	-78.7343	0.003342	0.014679	Fe''1.12Mg0.07Fe'''1.46Al0.15Cr0.00Ti0.20O4	0	7.068	3.36792	52.0797	0	36.1669	0	1.31749	0	0	0	0
2000	946	0.016177	0.031263	-78.1037	0.003318	0.014578	Fe''1.12Mg0.07Fe'''1.46Al0.15Cr0.00Ti0.19O4	0	6.96629	3.36406	52.2735	0	36.0916	0	1.30455	0	0	0	0
2000	945	0.01607	0.031035	-77.4858	0.003296	0.014478	Fe''1.12Mg0.07Fe'''1.47Al0.15Cr0.00Ti0.19O4	0	6.86471	3.36025	52.4672	0	36.0161	0	1.29175	0	0	0	0
2000	944	0.015966	0.030812	-76.8804	0.003273	0.014381	Fe''1.12Mg0.07Fe'''1.47Al0.15Cr0.00Ti0.19O4	0	6.76327	3.35649	52.6605	0	35.9406	0	1.27909	0	0	0	0
2000	943	0.015863	0.030593	-76.2875	0.003251	0.014286	Fe''1.12Mg0.07Fe'''1.48Al0.15Cr0.00Ti0.19O4	0	6.66199	3.35277	52.8536	0	35.865	0	1.26656	0	0	0	0
2000	942	0.015763	0.030378	-75.7067	0.00323	0.014193	Fe''1.11Mg0.07Fe'''1.49Al0.15Cr0.00Ti0.18O4	0	6.56086	3.34909	53.0465	0	35.7894	0	1.25416	0	0	0	0
2000	941	0.015664	0.030168	-75.1379	0.003209	0.014102	Fe''1.11Mg0.07Fe'''1.49Al0.15Cr0.00Ti0.18O4	0	6.45991	3.34545	53.239	0	35.7138	0	1.2419	0	0	0	0
2000	940	0.015568	0.029962	-74.5811	0.003188	0.014013	Fe''1.11Mg0.07Fe'''1.50Al0.15Cr0.00Ti0.18O4	0	6.35914	3.34185	53.4312	0	35.6381	0	1.22977	0	0	0	0
2000	939	0.015474	0.029761	-74.0359	0.003168	0.013926	Fe''1.11Mg0.07Fe'''1.50Al0.15Cr0.00Ti0.18O4	0	6.25856	3.33828	53.623	0	35.5624	0	1.21776	0	0	0	0
2000	938	0.015382	0.029564	-73.5023	0.003149	0.013841	Fe''1.11Mg0.07Fe'''1.51Al0.15Cr0.00Ti0.17O4	0	6.15819	3.33474	53.8145	0	35.4867	0	1.20589	0	0	0	0
2000	937	0.015293	0.029371	-72.9801	0.003129	0.013757	Fe''1.10Mg0.07Fe'''1.51Al0.15Cr0.00Ti0.17O4	0	6.05805	3.33123	54.0055	0	35.4111	0	1.19414	0	0	0	0
2000	936	0.015205	0.029182	-72.4691	0.003111	0.013676	Fe''1.10Mg0.07Fe'''1.52Al0.15Cr0.00Ti0.17O4	0	5.95813	3.32775	54.1962	0	35.3354	0	1.18252	0	0	0	0
2000	935	0.015119	0.028997	-71.9693	0.003092	0.013596	Fe''1.10Mg0.07Fe'''1.53Al0.15Cr0.00Ti0.16O4	0	5.85846	3.32429	54.3864	0	35.2598	0	1.17102	0	0	0	0
2000	934	0.015035	0.028817	-71.4804	0.003074	0.013518	Fe''1.10Mg0.06Fe'''1.53Al0.15Cr0.00Ti0.16O4	0	5.75905	3.32085	54.5762	0	35.1843	0	1.15965	0	0	0	0
2000	933	0.014953	0.02864	-71.0023	0.003057	0.013442	Fe''1.09Mg0.06Fe'''1.54Al0.15Cr0.00Ti0.16O4	0	5.65992	3.31743	54.7655	0	35.1088	0	1.1484	0	0	0	0
2000	931	0.001477	0.002826	-7.00535	0.000302	0.001327	Fe''1.10Mg0.06Fe'''1.53Al0.14Cr0.00Ti0.16O4	0	5.78446	3.24657	54.5815	0	35.2889	0	1.09855	0	0	0	0
2000	930	0.010968	0.020973	-51.9743	0.00224	0.009852	Fe''1.10Mg0.06Fe'''1.54Al0.14Cr0.00Ti0.16O4	0	5.72692	3.23526	54.7	0	35.2502	0	1.08761	0	0	0	0
2000	929	0.010843	0.020721	-51.3331	0.002214	0.009738	Fe''1.10Mg0.06Fe'''1.54Al0.14Cr0.00Ti0.16O4	0	5.66978	3.22396	54.8177	0	35.2118	0	1.07677	0	0	0	0
2000	928	0.010719	0.020472	-50.701	0.002189	0.009626	Fe''1.10Mg0.06Fe'''1.54Al0.14Cr0.00Ti0.16O4	0	5.61305	3.21266	54.9347	0	35.1736	0	1.06603	0	0	0	0
2000	927	0.010598	0.020227	-50.0779	0.002163	0.009515	Fe''1.10Mg0.06Fe'''1.55Al0.14Cr0.00Ti0.16O4	0	5.55672	3.20136	55.0509	0	35.1356	0	1.05538	0	0	0	0
2000	926	0.010477	0.019985	-49.4636	0.002138	0.009405	Fe''1.10Mg0.06Fe'''1.55Al0.14Cr0.00Ti0.15O4	0	5.5008	3.19005	55.1664	0	35.0979	0	1.04483	0	0	0	0
2000	925	0.010359	0.019747	-48.858	0.002113	0.009297	Fe''1.10Mg0.06Fe'''1.55Al0.14Cr0.00Ti0.15O4	0	5.44529	3.17875	55.2812	0	35.0603	0	1.03438	0	0	0	0
2000	924	0.010242	0.019512	-48.261	0.002089	0.00919	Fe''1.09Mg0.06Fe'''1.56Al0.14Cr0.00Ti0.15O4	0	5.39019	3.16745	55.3953	0	35.0231	0	1.02401	0	0	0	0
2000	923	0.010126	0.019279	-47.6723	0.002065	0.009085	Fe''1.09Mg0.06Fe'''1.56Al0.14Cr0.00Ti0.15O4	0	5.33549	3.15615	55.5086	0	34.986	0	1.01374	0	0	0	0
2000	922	0.010012	0.01905	-47.092	0.002041	0.008981	Fe''1.09Mg0.06Fe'''1.56Al0.14Cr0.00Ti0.15O4	0	5.28121	3.14484	55.6212	0	34.9492	0	1.00357	0	0	0	0
2000	921	0.009899	0.018824	-46.5197	0.002018	0.008878	Fe''1.09Mg0.06Fe'''1.57Al0.14Cr0.00Ti0.15O4	0	5.22734	3.13353	55.733	0	34.9127	0	0.993479	0	0	0	0
2000	920	0.009788	0.018601	-45.9554	0.001995	0.008777	Fe''1.09Mg0.05Fe'''1.57Al0.14Cr0.00Ti0.15O4	0	5.17388	3.12222	55.8441	0	34.8763	0	0.983481	0	0	0	0
2000	919	0.009678	0.018381	-45.3989	0.001972	0.008677	Fe''1.09Mg0.05Fe'''1.57Al0.14Cr0.00Ti0.14O4	0	5.12084	3.1109	55.9544	0	34.8403	0	0.973572	0	0	0	0
2000	918	0.00957	0.018164	-44.8501	0.00195	0.008578	Fe''1.09Mg0.05Fe'''1.58Al0.14Cr0.00Ti0.14O4	0	5.06821	3.09958	56.064	0	34.8045	0	0.96375	0	0	0	0
2000	917	0.009463	0.017949	-44.3088	0.001927	0.008481	Fe''1.09Mg0.05Fe'''1.58Al0.14Cr0.00Ti0.14O4	0	5.016	3.08825	56.1728	0	34.7689	0	0.954014	0	0	0	0
2000	916	0.009357	0.017738	-43.7751	0.001905	0.008384	Fe''1.09Mg0.05Fe'''1.58Al0.14Cr0.00Ti0.14O4	0	4.9642	3.07692	56.2809	0	34.7336	0	0.944364	0	0	0	0
2000	915	0.009252	0.017529	-43.2486	0.001884	0.008289	Fe''1.09Mg0.05Fe'''1.59Al0.14Cr0.00Ti0.14O4	0	4.91282	3.06558	56.3883	0	34.6985	0	0.934799	0	0	0	0
2000	914	0.009149	0.017323	-42.7293	0.001862	0.008195	Fe''1.09Mg0.05Fe'''1.59Al0.13Cr0.00Ti0.14O4	0	4.86186	3.05424	56.4948	0	34.6638	0	0.925317	0	0	0	0
2000	913	0.009047	0.017119	-42.217	0.001841	0.008103	Fe''1.08Mg0.05Fe'''1.59Al0.13Cr0.00Ti0.14O4	0	4.81132	3.04289	56.6007	0	34.6292	0	0.915918	0	0	0	0
2000	912	0.008947	0.016918	-41.7117	0.00182	0.008011	Fe''1.08Mg0.05Fe'''1.60Al0.13Cr0.00Ti0.13O4	0	4.76119	3.03153	56.7057	0	34.595	0	0.906601	0	0	0	0
2000	911	0.008847	0.01672	-41.2132	0.0018	0.007921	Fe''1.08Mg0.05Fe'''1.60Al0.13Cr0.00Ti0.13O4	0	4.71149	3.02016	56.81	0	34.561	0	0.897365	0	0	0	0
2000	910	0.008749	0.016524	-40.7215	0.001779	0.007832	Fe''1.08Mg0.05Fe'''1.60Al0.13Cr0.00Ti0.13O4	0	4.66221	3.00879	56.9136	0	34.5272	0	0.888208	0	0	0	0
2000	909	0.008652	0.016331	-40.2363	0.001759	0.007743	Fe''1.08Mg0.05Fe'''1.61Al0.13Cr0.00Ti0.13O4	0	4.61334	2.99741	57.0164	0	34.4937	0	0.879131	0	0	0	0
2000	908	0.008556	0.01614	-39.7576	0.001739	0.007656	Fe''1.08Mg0.05Fe'''1.61Al0.13Cr0.00Ti0.13O4	0	4.5649	2.98601	57.1184	0	34.4606	0	0.870132	0	0	0	0
2000	907	0.008462	0.015952	-39.2852	0.00172	0.00757	Fe''1.08Mg0.05Fe'''1.61Al0.13Cr0.00Ti0.13O4	0	4.51689	2.97462	57.2197	0	34.4276	0	0.86121	0	0	0	0
2000	906	0.008368	0.015766	-38.8191	0.0017	0.007485	Fe''1.08Mg0.05Fe'''1.62Al0.13Cr0.00Ti0.13O4	0	4.46929	2.96321	57.3202	0	34.395	0	0.852365	0	0	0	0
2000	905	0.008276	0.015582	-38.3592	0.001681	0.007401	Fe''1.08Mg0.05Fe'''1.62Al0.13Cr0.00Ti0.12O4	0	4.42212	2.95179	57.4199	0	34.3626	0	0.843596	0	0	0	0
2000	904	0.008184	0.015401	-37.9053	0.001662	0.007319	Fe''1.08Mg0.05Fe'''1.62Al0.13Cr0.00Ti0.12O4	0	4.37537	2.94036	57.5189	0	34.3305	0	0.834901	0	0	0	0
2000	903	0.008094	0.015222	-37.4574	0.001644	0.007237	Fe''1.08Mg0.05Fe'''1.63Al0.13Cr0.00Ti0.12O4	0	4.32904	2.92892	57.6171	0	34.2987	0	0.82628	0	0	0	0
2000	902	0.008005	0.015045	-37.0153	0.001625	0.007156	Fe''1.08Mg0.05Fe'''1.63Al0.13Cr0.00Ti0.12O4	0	4.28314	2.91748	57.7145	0	34.2671	0	0.817733	0	0	0	0
2000	901	0.007917	0.014871	-36.579	0.001607	0.007076	Fe''1.07Mg0.05Fe'''1.63Al0.13Cr0.00Ti0.12O4	0	4.23766	2.90602	57.8112	0	34.2359	0	0.809258	0	0	0	0
2000	900	0.00783	0.014698	-36.1483	0.001589	0.006997	Fe''1.07Mg0.04Fe'''1.64Al0.13Cr0.00Ti0.12O4	0	4.19261	2.89455	57.9071	0	34.2049	0	0.800854	0	0	0	0
clinopyroxene_0	thermodynamic	data	and	composition:
Pressure	Temperature	mass	S	H	V	Cp	structure	formula	SiO2	TiO2	Al2O3	Fe2O3	Cr2O3	FeO	MnO	MgO	CaO	Na2O	K2O	H2O
2000	1163	0.339803	0.796044	-4336.76	0.105316	0.407824	cpx	Na0.01Ca0.67Fe''0.21Mg1.00Fe'''0.03Ti0.00Al0.17Si1.91O6	52.299	0.0559357	3.85898	1.09868	0	6.92311	0	18.3419	17.2295	0.192865	0	0
2000	1162	0.246485	0.577205	-3144.78	0.076377	0.295755	cpx	Na0.01Ca0.67Fe''0.21Mg1.00Fe'''0.03Ti0.00Al0.17Si1.91O6	52.2882	0.056793	3.85663	1.10355	0	6.96758	0	18.3182	17.2154	0.193677	0	0
2000	1161	0.240108	0.562048	-3062.44	0.074385	0.288034	cpx	Na0.01Ca0.67Fe''0.21Mg0.99Fe'''0.03Ti0.00Al0.17Si1.91O6	52.2773	0.0576564	3.8543	1.10841	0	7.0121	0	18.2944	17.2014	0.194489	0	0
2000	1160	0.233939	0.547393	-2982.81	0.072459	0.280566	cpx	Na0.01Ca0.67Fe''0.22Mg0.99Fe'''0.03Ti0.00Al0.17Si1.91O6	52.2664	0.0585261	3.85199	1.11328	0	7.05666	0	18.2704	17.1875	0.195302	0	0
2000	1159	0.227971	0.533217	-2905.78	0.070595	0.273343	cpx	Na0.01Ca0.67Fe''0.22Mg0.99Fe'''0.03Ti0.00Al0.17Si1.91O6	52.2555	0.059402	3.84969	1.11815	0	7.10128	0	18.2463	17.1736	0.196116	0	0
2000	1158	0.222196	0.519502	-2831.25	0.068792	0.266353	cpx	Na0.01Ca0.67Fe''0.22Mg0.99Fe'''0.03Ti0.00Al0.17Si1.91O6	52.2445	0.0602841	3.8474	1.12302	0	7.14595	0	18.222	17.1599	0.196931	0	0
2000	1157	0.216604	0.506228	-2759.12	0.067046	0.259587	cpx	Na0.01Ca0.67Fe''0.22Mg0.99Fe'''0.03Ti0.00Al0.17Si1.91O6	52.2335	0.0611726	3.84513	1.12789	0	7.19067	0	18.1977	17.1463	0.197748	0	0
2000	1156	0.137347	0.320861	-1749.05	0.042505	0.16456	cpx	Na0.01Ca0.67Fe''0.22Mg0.99Fe'''0.03Ti0.00Al0.17Si1.91O6	52.2223	0.0621412	3.84327	1.13268	0	7.22887	0	18.1696	17.1425	0.198643	0	0
2000	1155	0.126008	0.294244	-1604.24	0.038988	0.150932	cpx	Na0.01Ca0.67Fe''0.22Mg0.99Fe'''0.03Ti0.00Al0.17Si1.91O6	52.2102	0.0631655	3.84203	1.13779	0	7.26345	0	18.1371	17.1466	0.199607	0	0
2000	1154	0.122286	0.285428	-1556.45	0.037829	0.146434	cpx	Na0.01Ca0.67Fe''0.22Mg0.99Fe'''0.03Ti0.00Al0.17Si1.91O6	52.1981	0.0642003	3.8408	1.1429	0	7.29798	0	18.1046	17.1509	0.200573	0	0
2000	1153	0.118693	0.276918	-1510.31	0.03671	0.14209	cpx	Na0.01Ca0.67Fe''0.22Mg0.98Fe'''0.03Ti0.00Al0.17Si1.91O6	52.1859	0.0652458	3.8396	1.14802	0	7.33248	0	18.0719	17.1553	0.201543	0	0
2000	1152	0.115221	0.268702	-1465.76	0.03563	0.137896	cpx	Na0.01Ca0.67Fe''0.23Mg0.98Fe'''0.03Ti0.00Al0.17Si1.91O6	52.1737	0.066302	3.8384	1.15316	0	7.36696	0	18.0392	17.1598	0.202517	0	0
2000	1151	0.111867	0.260766	-1422.73	0.034586	0.133845	cpx	Na0.01Ca0.67Fe''0.23Mg0.98Fe'''0.03Ti0.00Al0.17Si1.91O6	52.1615	0.0673692	3.83722	1.1583	0	7.4014	0	18.0063	17.1644	0.203493	0	0
2000	1150	0.108627	0.253101	-1381.15	0.033577	0.129931	cpx	Na0.01Ca0.67Fe''0.23Mg0.98Fe'''0.03Ti0.00Al0.17Si1.91O6	52.1492	0.0684474	3.83606	1.16346	0	7.43582	0	17.9734	17.1691	0.204474	0	0
2000	1149	0.105494	0.245694	-1340.98	0.032602	0.126149	cpx	Na0.01Ca0.67Fe''0.23Mg0.98Fe'''0.03Ti0.00Al0.17Si1.91O6	52.1369	0.0695367	3.83492	1.16863	0	7.47021	0	17.9404	17.1739	0.205457	0	0
2000	1148	0.102466	0.238537	-1302.15	0.03166	0.122493	cpx	Na0.01Ca0.67Fe''0.23Mg0.98Fe'''0.03Ti0.00Al0.17Si1.91O6	52.1246	0.0706373	3.83378	1.17381	0	7.50457	0	17.9073	17.1788	0.206444	0	0
2000	1147	0.099538	0.231618	-1264.61	0.03075	0.118959	cpx	Na0.01Ca0.67Fe''0.23Mg0.97Fe'''0.03Ti0.00Al0.17Si1.91O6	52.1123	0.0717493	3.83267	1.17901	0	7.53892	0	17.8742	17.1838	0.207435	0	0
2000	1146	0.096706	0.224929	-1228.31	0.029869	0.115542	cpx	Na0.01Ca0.67Fe''0.23Mg0.97Fe'''0.03Ti0.00Al0.17Si1.91O6	52.0999	0.0728728	3.83157	1.18422	0	7.57324	0	17.8409	17.1889	0.208429	0	0
2000	1145	0.093967	0.218461	-1193.2	0.029017	0.112237	cpx	Na0.01Ca0.67Fe''0.23Mg0.97Fe'''0.03Ti0.00Al0.17Si1.91O6	52.0874	0.074008	3.83048	1.18944	0	7.60755	0	17.8076	17.1941	0.209427	0	0
2000	1144	0.091317	0.212206	-1159.25	0.028193	0.109041	cpx	Na0.01Ca0.67Fe''0.23Mg0.97Fe'''0.03Ti0.00Al0.17Si1.91O6	52.075	0.0751549	3.82941	1.19468	0	7.64184	0	17.7741	17.1994	0.210429	0	0
2000	1143	0.088752	0.206154	-1126.39	0.027396	0.105948	cpx	Na0.02Ca0.67Fe''0.24Mg0.97Fe'''0.03Ti0.00Al0.17Si1.91O6	52.0624	0.0763138	3.82836	1.19993	0	7.67612	0	17.7406	17.2048	0.211435	0	0
2000	1142	0.08627	0.200299	-1094.6	0.026624	0.102955	cpx	Na0.02Ca0.68Fe''0.24Mg0.97Fe'''0.03Ti0.00Al0.17Si1.91O6	52.0499	0.0774847	3.82732	1.2052	0	7.71038	0	17.707	17.2103	0.212444	0	0
2000	1141	0.083867	0.194633	-1063.84	0.025878	0.100059	cpx	Na0.02Ca0.68Fe''0.24Mg0.97Fe'''0.03Ti0.00Al0.17Si1.91O6	52.0373	0.0786678	3.8263	1.21048	0	7.74463	0	17.6733	17.2159	0.213457	0	0
2000	1140	0.08154	0.18915	-1034.05	0.025155	0.097255	cpx	Na0.02Ca0.68Fe''0.24Mg0.96Fe'''0.03Ti0.00Al0.17Si1.91O6	52.0247	0.0798632	3.82529	1.21578	0	7.77888	0	17.6395	17.2215	0.214475	0	0
2000	1139	0.079287	0.183841	-1005.22	0.024455	0.09454	cpx	Na0.02Ca0.68Fe''0.24Mg0.96Fe'''0.03Ti0.00Al0.17Si1.91O6	52.012	0.0810711	3.82429	1.22109	0	7.81311	0	17.6056	17.2273	0.215496	0	0
2000	1138	0.077105	0.178701	-977.291	0.023777	0.091912	cpx	Na0.02Ca0.68Fe''0.24Mg0.96Fe'''0.03Ti0.00Al0.17Si1.91O6	51.9993	0.0822917	3.82332	1.22642	0	7.84735	0	17.5716	17.2331	0.216521	0	0
2000	1137	0.074991	0.173724	-950.247	0.02312	0.089366	cpx	Na0.02Ca0.68Fe''0.24Mg0.96Fe'''0.03Ti0.00Al0.17Si1.91O6	51.9866	0.083525	3.82235	1.23177	0	7.88157	0	17.5376	17.239	0.217551	0	0
2000	1136	0.072943	0.168904	-924.05	0.022485	0.0869	cpx	Na0.02Ca0.68Fe''0.24Mg0.96Fe'''0.03Ti0.00Al0.17Si1.91O6	51.9738	0.0847712	3.8214	1.23714	0	7.9158	0	17.5034	17.245	0.218584	0	0
2000	1135	0.070958	0.164234	-898.671	0.021868	0.084511	cpx	Na0.02Ca0.68Fe''0.24Mg0.96Fe'''0.03Ti0.00Al0.17Si1.91O6	51.961	0.0860305	3.82047	1.24253	0	7.95002	0	17.4692	17.2511	0.219622	0	0
2000	1134	0.069035	0.15971	-874.079	0.021271	0.082196	cpx	Na0.02Ca0.68Fe''0.24Mg0.95Fe'''0.03Ti0.00Al0.17Si1.91O6	51.9481	0.0873031	3.81955	1.24793	0	7.98425	0	17.4349	17.2573	0.220664	0	0
2000	1133	0.06717	0.155327	-850.246	0.020693	0.079953	cpx	Na0.02Ca0.68Fe''0.25Mg0.95Fe'''0.03Ti0.00Al0.17Si1.91O6	51.9352	0.088589	3.81865	1.25336	0	8.01848	0	17.4005	17.2635	0.22171	0	0
2000	1132	0.065363	0.151079	-827.147	0.020132	0.077779	cpx	Na0.02Ca0.68Fe''0.25Mg0.95Fe'''0.03Ti0.00Al0.17Si1.91O6	51.9223	0.0898885	3.81776	1.2588	0	8.05272	0	17.366	17.2698	0.222761	0	0
2000	1131	0.06361	0.146962	-804.754	0.019588	0.075671	cpx	Na0.02Ca0.68Fe''0.25Mg0.95Fe'''0.03Ti0.00Al0.17Si1.91O6	51.9093	0.0912017	3.81689	1.26427	0	8.08697	0	17.3314	17.2762	0.223816	0	0
2000	1130	0.061911	0.142971	-783.044	0.019061	0.073628	cpx	Na0.02Ca0.68Fe''0.25Mg0.95Fe'''0.04Ti0.00Al0.17Si1.91O6	51.8963	0.0925288	3.81603	1.26975	0	8.12122	0	17.2967	17.2827	0.224876	0	0
2000	1129	0.060263	0.139101	-761.993	0.01855	0.071646	cpx	Na0.02Ca0.68Fe''0.25Mg0.94Fe'''0.04Ti0.00Al0.17Si1.91O6	51.8832	0.09387	3.81518	1.27526	0	8.15549	0	17.2619	17.2892	0.22594	0	0
2000	1128	0.058664	0.135349	-741.577	0.018054	0.069725	cpx	Na0.02Ca0.68Fe''0.25Mg0.94Fe'''0.04Ti0.00Al0.17Si1.91O6	51.87	0.0952254	3.81436	1.28078	0	8.18976	0	17.227	17.2958	0.227008	0	0
2000	1127	0.057113	0.13171	-721.776	0.017573	0.067861	cpx	Na0.02Ca0.68Fe''0.25Mg0.94Fe'''0.04Ti0.00Al0.17Si1.91O6	51.8569	0.0965952	3.81354	1.28633	0	8.22406	0	17.192	17.3025	0.228082	0	0
2000	1126	0.055608	0.128181	-702.567	0.017106	0.066053	cpx	Na0.02Ca0.68Fe''0.25Mg0.94Fe'''0.04Ti0.00Al0.17Si1.91O6	51.8437	0.0979796	3.81274	1.2919	0	8.25837	0	17.157	17.3092	0.229159	0	0
2000	1125	0.054147	0.124758	-683.932	0.016654	0.064299	cpx	Na0.02Ca0.68Fe''0.25Mg0.94Fe'''0.04Ti0.00Al0.17Si1.90O6	51.8304	0.0993787	3.81196	1.2975	0	8.2927	0	17.1218	17.316	0.230242	0	0
2000	1124	0.05273	0.121437	-665.851	0.016215	0.062598	cpx	Na0.02Ca0.68Fe''0.26Mg0.94Fe'''0.04Ti0.00Al0.17Si1.90O6	51.8171	0.100793	3.81119	1.30312	0	8.32704	0	17.0866	17.3229	0.231329	0	0
2000	1123	0.051354	0.118215	-648.304	0.015788	0.060946	cpx	Na0.02Ca0.68Fe''0.26Mg0.93Fe'''0.04Ti0.00Al0.17Si1.90O6	51.8037	0.102222	3.81044	1.30876	0	8.36142	0	17.0513	17.3298	0.232421	0	0
2000	1122	0.050019	0.115088	-631.275	0.015375	0.059344	cpx	Na0.02Ca0.68Fe''0.26Mg0.93Fe'''0.04Ti0.00Al0.17Si1.90O6	51.7903	0.103667	3.8097	1.31443	0	8.39581	0	17.0158	17.3368	0.233518	0	0
2000	1121	0.048723	0.112054	-614.746	0.014973	0.057788	cpx	Na0.02Ca0.68Fe''0.26Mg0.93Fe'''0.04Ti0.00Al0.17Si1.90O6	51.7768	0.105127	3.80898	1.32012	0	8.43023	0	16.9803	17.3438	0.23462	0	0
2000	1120	0.047464	0.109109	-598.7	0.014583	0.056278	cpx	Na0.02Ca0.68Fe''0.26Mg0.93Fe'''0.04Ti0.00Al0.17Si1.90O6	51.7633	0.106602	3.80827	1.32584	0	8.46469	0	16.9447	17.3509	0.235726	0	0
2000	1119	0.046242	0.10625	-583.123	0.014205	0.054812	cpx	Na0.02Ca0.68Fe''0.26Mg0.93Fe'''0.04Ti0.00Al0.17Si1.90O6	51.7498	0.108094	3.80758	1.33158	0	8.49917	0	16.909	17.358	0.236838	0	0
2000	1118	0.045054	0.103475	-567.998	0.013837	0.053389	cpx	Na0.02Ca0.68Fe''0.26Mg0.93Fe'''0.04Ti0.00Al0.17Si1.90O6	51.7361	0.109602	3.80691	1.33735	0	8.53368	0	16.8731	17.3652	0.237954	0	0
2000	1117	0.043902	0.100781	-553.31	0.013481	0.052007	cpx	Na0.02Ca0.69Fe''0.26Mg0.92Fe'''0.04Ti0.00Al0.17Si1.90O6	51.7225	0.111126	3.80625	1.34315	0	8.56823	0	16.8372	17.3725	0.239076	0	0
2000	1116	0.042782	0.098165	-539.047	0.013134	0.050665	cpx	Na0.02Ca0.69Fe''0.26Mg0.92Fe'''0.04Ti0.00Al0.17Si1.90O6	51.7087	0.112667	3.8056	1.34897	0	8.60281	0	16.8012	17.3798	0.240203	0	0
2000	1115	0.041694	0.095624	-525.193	0.012797	0.049361	cpx	Na0.02Ca0.69Fe''0.27Mg0.92Fe'''0.04Ti0.00Al0.17Si1.90O6	51.695	0.114224	3.80497	1.35482	0	8.63743	0	16.7651	17.3872	0.241335	0	0
2000	1114	0.040637	0.093157	-511.736	0.01247	0.048095	cpx	Na0.02Ca0.69Fe''0.27Mg0.92Fe'''0.04Ti0.00Al0.17Si1.90O6	51.6811	0.115799	3.80436	1.3607	0	8.67209	0	16.7289	17.3946	0.242472	0	0
2000	1113	0.03961	0.09076	-498.664	0.012153	0.046865	cpx	Na0.02Ca0.69Fe''0.27Mg0.92Fe'''0.04Ti0.00Al0.17Si1.90O6	51.6672	0.117391	3.80376	1.36661	0	8.70679	0	16.6926	17.402	0.243614	0	0
2000	1112	0.038612	0.088432	-485.964	0.011844	0.04567	cpx	Na0.02Ca0.69Fe''0.27Mg0.92Fe'''0.04Ti0.00Al0.17Si1.90O6	51.6533	0.119	3.80318	1.37255	0	8.74154	0	16.6562	17.4095	0.244762	0	0
2000	1111	0.037642	0.086171	-473.624	0.011544	0.04451	cpx	Na0.02Ca0.69Fe''0.27Mg0.91Fe'''0.04Ti0.00Al0.17Si1.90O6	51.6393	0.120626	3.80261	1.37852	0	8.77633	0	16.6197	17.4171	0.245915	0	0
2000	1110	0.036699	0.083974	-461.633	0.011253	0.043381	cpx	Na0.02Ca0.69Fe''0.27Mg0.91Fe'''0.04Ti0.00Al0.17Si1.90O6	51.6252	0.122271	3.80206	1.38452	0	8.81117	0	16.583	17.4247	0.247073	0	0
2000	1109	0.035783	0.081839	-449.981	0.010969	0.042285	cpx	Na0.02Ca0.69Fe''0.27Mg0.91Fe'''0.04Ti0.00Al0.17Si1.90O6	51.6111	0.123934	3.80153	1.39055	0	8.84606	0	16.5463	17.4323	0.248237	0	0
2000	1108	0.034892	0.079765	-438.656	0.010694	0.04122	cpx	Na0.02Ca0.69Fe''0.27Mg0.91Fe'''0.04Ti0.00Al0.17Si1.90O6	51.5969	0.125615	3.80101	1.39661	0	8.881	0	16.5095	17.4399	0.249407	0	0
2000	1107	0.034026	0.077749	-427.649	0.010427	0.040184	cpx	Na0.02Ca0.69Fe''0.28Mg0.91Fe'''0.04Ti0.00Al0.17Si1.90O6	51.5827	0.127314	3.80051	1.4027	0	8.91599	0	16.4726	17.4477	0.250582	0	0
2000	1106	0.033184	0.07579	-416.95	0.010166	0.039178	cpx	Na0.02Ca0.69Fe''0.28Mg0.90Fe'''0.04Ti0.00Al0.17Si1.90O6	51.5684	0.129033	3.80003	1.40883	0	8.95104	0	16.4356	17.4554	0.251762	0	0
2000	1105	0.032366	0.073886	-406.549	0.009914	0.0382	cpx	Na0.02Ca0.69Fe''0.28Mg0.90Fe'''0.04Ti0.00Al0.17Si1.90O6	51.554	0.130771	3.79956	1.41499	0	8.98615	0	16.3984	17.4632	0.252948	0	0
2000	1104	0.03157	0.072035	-396.438	0.009668	0.037249	cpx	Na0.02Ca0.69Fe''0.28Mg0.90Fe'''0.04Ti0.00Al0.17Si1.90O6	51.5396	0.132528	3.79911	1.42118	0	9.02132	0	16.3612	17.471	0.25414	0	0
2000	1103	0.030796	0.070236	-386.607	0.009429	0.036324	cpx	Na0.02Ca0.69Fe''0.28Mg0.90Fe'''0.04Ti0.00Al0.17Si1.90O6	51.5251	0.134304	3.79867	1.42741	0	9.05655	0	16.3238	17.4788	0.255338	0	0
2000	1102	0.030043	0.068487	-377.048	0.009196	0.035425	cpx	Na0.02Ca0.69Fe''0.28Mg0.90Fe'''0.04Ti0.00Al0.17Si1.90O6	51.5105	0.136101	3.79825	1.43368	0	9.09185	0	16.2864	17.4867	0.256541	0	0
2000	1101	0.029311	0.066786	-367.753	0.00897	0.034551	cpx	Na0.02Ca0.69Fe''0.28Mg0.90Fe'''0.04Ti0.00Al0.17Si1.90O6	51.4959	0.137918	3.79785	1.43997	0	9.12721	0	16.2488	17.4946	0.257751	0	0
2000	1100	0.028599	0.065133	-358.713	0.00875	0.0337	cpx	Na0.02Ca0.69Fe''0.28Mg0.89Fe'''0.04Ti0.00Al0.17Si1.90O6	51.4812	0.139755	3.79747	1.44631	0	9.16264	0	16.2111	17.5026	0.258966	0	0
2000	1099	0.027906	0.063525	-349.923	0.008537	0.032874	cpx	Na0.02Ca0.69Fe''0.28Mg0.89Fe'''0.04Ti0.00Al0.17Si1.90O6	51.4664	0.141613	3.7971	1.45268	0	9.19814	0	16.1733	17.5105	0.260187	0	0
2000	1098	0.027233	0.061962	-341.373	0.008329	0.03207	cpx	Na0.02Ca0.69Fe''0.29Mg0.89Fe'''0.04Ti0.00Al0.17Si1.90O6	51.4516	0.143492	3.79675	1.45909	0	9.23371	0	16.1355	17.5185	0.261414	0	0
2000	1097	0.026577	0.060442	-333.056	0.008127	0.031288	cpx	Na0.02Ca0.69Fe''0.29Mg0.89Fe'''0.04Ti0.00Al0.17Si1.90O6	51.4367	0.145392	3.79642	1.46554	0	9.26936	0	16.0974	17.5265	0.262647	0	0
2000	1096	0.025939	0.058963	-324.967	0.00793	0.030527	cpx	Na0.02Ca0.69Fe''0.29Mg0.89Fe'''0.04Ti0.00Al0.17Si1.90O6	51.4217	0.147314	3.7961	1.47203	0	9.30509	0	16.0593	17.5346	0.263887	0	0
2000	1095	0.025319	0.057525	-317.098	0.007738	0.029787	cpx	Na0.02Ca0.70Fe''0.29Mg0.88Fe'''0.04Ti0.00Al0.17Si1.90O6	51.4066	0.149258	3.79581	1.47855	0	9.34089	0	16.0211	17.5427	0.265132	0	0
2000	1094	0.024715	0.056126	-309.443	0.007552	0.029067	cpx	Na0.02Ca0.70Fe''0.29Mg0.88Fe'''0.04Ti0.00Al0.17Si1.90O6	51.3915	0.151224	3.79553	1.48512	0	9.37678	0	15.9827	17.5507	0.266384	0	0
2000	1093	0.024127	0.054766	-301.995	0.007371	0.028367	cpx	Na0.02Ca0.70Fe''0.29Mg0.88Fe'''0.04Ti0.00Al0.17Si1.90O6	51.3763	0.153212	3.79527	1.49172	0	9.41275	0	15.9443	17.5589	0.267642	0	0
2000	1092	0.023555	0.053442	-294.749	0.007195	0.027686	cpx	Na0.02Ca0.70Fe''0.29Mg0.88Fe'''0.04Ti0.00Al0.17Si1.90O6	51.361	0.155224	3.79502	1.49837	0	9.4488	0	15.9057	17.567	0.268906	0	0
2000	1091	0.022999	0.052155	-287.699	0.007023	0.027023	cpx	Na0.02Ca0.70Fe''0.29Mg0.88Fe'''0.04Ti0.00Al0.17Si1.90O6	51.3457	0.157258	3.7948	1.50506	0	9.48494	0	15.867	17.5751	0.270177	0	0
2000	1090	0.022457	0.050902	-280.839	0.006856	0.026378	cpx	Na0.02Ca0.70Fe''0.29Mg0.87Fe'''0.04Ti0.00Al0.17Si1.90O6	51.3302	0.159316	3.79459	1.51179	0	9.52118	0	15.8281	17.5833	0.271454	0	0
2000	1089	0.02193	0.049684	-274.163	0.006694	0.02575	cpx	Na0.02Ca0.70Fe''0.30Mg0.87Fe'''0.04Ti0.00Al0.17Si1.90O6	51.3147	0.161398	3.79441	1.51857	0	9.5575	0	15.7892	17.5915	0.272738	0	0
2000	1088	0.021417	0.048498	-267.667	0.006536	0.025139	cpx	Na0.02Ca0.70Fe''0.30Mg0.87Fe'''0.04Ti0.00Al0.17Si1.90O6	51.2991	0.163504	3.79424	1.52539	0	9.59392	0	15.7501	17.5997	0.274028	0	0
2000	1087	0.020918	0.047344	-261.345	0.006382	0.024545	cpx	Na0.02Ca0.70Fe''0.30Mg0.87Fe'''0.04Ti0.00Al0.17Si1.90O6	51.2835	0.165635	3.79409	1.53225	0	9.63044	0	15.7109	17.6079	0.275325	0	0
2000	1086	0.020432	0.046222	-255.192	0.006232	0.023967	cpx	Na0.02Ca0.70Fe''0.30Mg0.87Fe'''0.04Ti0.00Al0.17Si1.90O6	51.2677	0.16779	3.79396	1.53916	0	9.66706	0	15.6716	17.6161	0.276629	0	0
2000	1085	0.019958	0.045129	-249.204	0.006087	0.023404	cpx	Na0.02Ca0.70Fe''0.30Mg0.86Fe'''0.04Ti0.00Al0.17Si1.90O6	51.2519	0.169971	3.79385	1.54612	0	9.70377	0	15.6321	17.6243	0.277939	0	0
2000	1084	0.019498	0.044066	-243.376	0.005945	0.022856	cpx	Na0.02Ca0.70Fe''0.30Mg0.86Fe'''0.04Ti0.00Al0.17Si1.90O6	51.236	0.172177	3.79376	1.55312	0	9.7406	0	15.5926	17.6326	0.279257	0	0
2000	1083	0.019049	0.043032	-237.703	0.005807	0.022323	cpx	Na0.02Ca0.70Fe''0.30Mg0.86Fe'''0.04Ti0.00Al0.17Si1.90O6	51.2199	0.17441	3.79368	1.56018	0	9.77752	0	15.5529	17.6408	0.280581	0	0
2000	1082	0.018613	0.042025	-232.181	0.005672	0.021804	cpx	Na0.02Ca0.70Fe''0.30Mg0.86Fe'''0.04Ti0.00Al0.17Si1.90O6	51.2038	0.176669	3.79363	1.56727	0	9.81456	0	15.513	17.6491	0.281912	0	0
2000	1081	0.018188	0.041045	-226.806	0.005542	0.021299	cpx	Na0.02Ca0.70Fe''0.31Mg0.86Fe'''0.04Ti0.00Al0.17Si1.90O6	51.1877	0.178954	3.7936	1.57442	0	9.85171	0	15.4731	17.6573	0.28325	0	0
2000	1080	0.017774	0.040092	-221.574	0.005414	0.020807	cpx	Na0.02Ca0.70Fe''0.31Mg0.85Fe'''0.04Ti0.01Al0.17Si1.90O6	51.1714	0.181267	3.79359	1.58162	0	9.88897	0	15.433	17.6656	0.284595	0	0
2000	1079	0.017371	0.039164	-216.481	0.00529	0.020328	cpx	Na0.02Ca0.70Fe''0.31Mg0.85Fe'''0.04Ti0.01Al0.17Si1.90O6	51.155	0.183607	3.7936	1.58887	0	9.92635	0	15.3927	17.6739	0.285947	0	0
2000	1078	0.016978	0.038261	-211.522	0.00517	0.019862	cpx	Na0.02Ca0.70Fe''0.31Mg0.85Fe'''0.04Ti0.01Al0.17Si1.90O6	51.1385	0.185975	3.79363	1.59617	0	9.96384	0	15.3524	17.6822	0.287306	0	0
2000	1077	0.016596	0.037381	-206.695	0.005052	0.019409	cpx	Na0.02Ca0.70Fe''0.31Mg0.85Fe'''0.04Ti0.01Al0.17Si1.90O6	51.122	0.188372	3.79368	1.60353	0	10.0015	0	15.3119	17.6904	0.288673	0	0
2000	1076	0.016224	0.036525	-201.996	0.004938	0.018967	cpx	Na0.02Ca0.70Fe''0.31Mg0.85Fe'''0.05Ti0.01Al0.17Si1.90O6	51.1053	0.190797	3.79376	1.61093	0	10.0392	0	15.2712	17.6987	0.290047	0	0
2000	1075	0.015862	0.035692	-197.421	0.004826	0.018537	cpx	Na0.02Ca0.71Fe''0.31Mg0.84Fe'''0.05Ti0.01Al0.17Si1.90O6	51.0886	0.193252	3.79385	1.6184	0	10.0771	0	15.2304	17.707	0.291429	0	0
2000	1074	0.015509	0.034882	-192.967	0.004718	0.018119	cpx	Na0.02Ca0.71Fe''0.31Mg0.84Fe'''0.05Ti0.01Al0.17Si1.90O6	51.0717	0.195736	3.79397	1.62591	0	10.1151	0	15.1895	17.7153	0.292817	0	0
2000	1073	0.015166	0.034092	-188.63	0.004612	0.017712	cpx	Na0.02Ca0.71Fe''0.32Mg0.84Fe'''0.05Ti0.01Al0.17Si1.90O6	51.0548	0.198251	3.79411	1.63348	0	10.1532	0	15.1484	17.7235	0.294214	0	0
2000	1072	0.014831	0.033324	-184.408	0.00451	0.017315	cpx	Na0.02Ca0.71Fe''0.32Mg0.84Fe'''0.05Ti0.01Al0.17Si1.90O6	51.0377	0.200796	3.79427	1.64111	0	10.1914	0	15.1072	17.7318	0.295618	0	0
2000	1071	0.014505	0.032576	-180.297	0.00441	0.016929	cpx	Na0.02Ca0.71Fe''0.32Mg0.84Fe'''0.05Ti0.01Al0.17Si1.90O6	51.0206	0.203372	3.79445	1.6488	0	10.2298	0	15.0659	17.7401	0.29703	0	0
2000	1070	0.014188	0.031848	-176.294	0.004312	0.016553	cpx	Na0.02Ca0.71Fe''0.32Mg0.83Fe'''0.05Ti0.01Al0.17Si1.90O6	51.0033	0.20598	3.79466	1.65654	0	10.2683	0	15.0244	17.7483	0.298449	0	0
2000	1069	0.013879	0.031139	-172.397	0.004217	0.016187	cpx	Na0.02Ca0.71Fe''0.32Mg0.83Fe'''0.05Ti0.01Al0.17Si1.90O6	50.9859	0.20862	3.79489	1.66435	0	10.307	0	14.9827	17.7566	0.299876	0	0
2000	1068	0.013578	0.030449	-168.602	0.004125	0.01583	cpx	Na0.02Ca0.71Fe''0.32Mg0.83Fe'''0.05Ti0.01Al0.17Si1.90O6	50.9685	0.211292	3.79514	1.67221	0	10.3458	0	14.9409	17.7648	0.301311	0	0
2000	1067	0.013285	0.029777	-164.908	0.004035	0.015483	cpx	Na0.02Ca0.71Fe''0.32Mg0.83Fe'''0.05Ti0.01Al0.17Si1.90O6	50.9509	0.213998	3.79542	1.68014	0	10.3848	0	14.8989	17.7731	0.302755	0	0
2000	1066	0.013	0.029123	-161.31	0.003947	0.015145	cpx	Na0.02Ca0.71Fe''0.32Mg0.83Fe'''0.05Ti0.01Al0.17Si1.90O6	50.9332	0.216737	3.79571	1.68813	0	10.4239	0	14.8568	17.7813	0.304206	0	0
2000	1065	0.012722	0.028486	-157.807	0.003862	0.014816	cpx	Na0.02Ca0.71Fe''0.33Mg0.82Fe'''0.05Ti0.01Al0.17Si1.90O6	50.9154	0.21951	3.79604	1.69618	0	10.4632	0	14.8146	17.7895	0.305665	0	0
2000	1064	0.012452	0.027867	-154.397	0.003779	0.014496	cpx	Na0.02Ca0.71Fe''0.33Mg0.82Fe'''0.05Ti0.01Al0.17Si1.90O6	50.8974	0.222318	3.79639	1.7043	0	10.5026	0	14.7721	17.7977	0.307133	0	0
2000	1063	0.012188	0.027263	-151.076	0.003698	0.014184	cpx	Na0.02Ca0.71Fe''0.33Mg0.82Fe'''0.05Ti0.01Al0.17Si1.90O6	50.8794	0.225161	3.79676	1.71248	0	10.5421	0	14.7295	17.8059	0.308608	0	0
2000	1062	0.011932	0.026676	-147.842	0.003619	0.01388	cpx	Na0.02Ca0.71Fe''0.33Mg0.82Fe'''0.05Ti0.01Al0.17Si1.90O6	50.8612	0.22804	3.79716	1.72073	0	10.5819	0	14.6868	17.8141	0.310093	0	0
2000	1061	0.011682	0.026104	-144.694	0.003543	0.013585	cpx	Na0.02Ca0.71Fe''0.33Mg0.81Fe'''0.05Ti0.01Al0.17Si1.90O6	50.843	0.230955	3.79758	1.72904	0	10.6217	0	14.6439	17.8223	0.311585	0	0
2000	1060	0.011438	0.025547	-141.629	0.003468	0.013297	cpx	Na0.02Ca0.71Fe''0.33Mg0.81Fe'''0.05Ti0.01Al0.17Si1.90O6	50.8246	0.233908	3.79803	1.73743	0	10.6618	0	14.6008	17.8304	0.313086	0	0
2000	1059	0.011201	0.025005	-138.644	0.003395	0.013017	cpx	Na0.02Ca0.71Fe''0.33Mg0.81Fe'''0.05Ti0.01Al0.17Si1.90O6	50.806	0.236897	3.79851	1.74588	0	10.702	0	14.5575	17.8385	0.314596	0	0
2000	1058	0.010971	0.024478	-135.738	0.003325	0.012744	cpx	Na0.02Ca0.71Fe''0.34Mg0.81Fe'''0.05Ti0.01Al0.17Si1.90O6	50.7874	0.239925	3.79901	1.75441	0	10.7424	0	14.5141	17.8466	0.316115	0	0
2000	1057	0.010746	0.023964	-132.909	0.003256	0.012478	cpx	Na0.02Ca0.71Fe''0.34Mg0.81Fe'''0.05Ti0.01Al0.17Si1.90O6	50.7686	0.242992	3.79954	1.76301	0	10.783	0	14.4705	17.8547	0.317642	0	0
2000	1056	0.010527	0.023465	-130.154	0.003189	0.01222	cpx	Na0.02Ca0.72Fe''0.34Mg0.80Fe'''0.05Ti0.01Al0.17Si1.90O6	50.7497	0.246098	3.80009	1.77168	0	10.8237	0	14.4268	17.8628	0.319178	0	0
2000	1055	0.010314	0.022978	-127.473	0.003123	0.011968	cpx	Na0.02Ca0.72Fe''0.34Mg0.80Fe'''0.05Ti0.01Al0.17Si1.90O6	50.7307	0.249244	3.80067	1.78042	0	10.8646	0	14.3828	17.8708	0.320723	0	0
2000	1054	0.010106	0.022504	-124.862	0.00306	0.011723	cpx	Na0.02Ca0.72Fe''0.34Mg0.80Fe'''0.05Ti0.01Al0.17Si1.90O6	50.7115	0.252431	3.80128	1.78924	0	10.9057	0	14.3387	17.8789	0.322277	0	0
2000	1053	0.009904	0.022044	-122.32	0.002998	0.011484	cpx	Na0.02Ca0.72Fe''0.34Mg0.80Fe'''0.05Ti0.01Al0.17Si1.90O6	50.6922	0.255659	3.80192	1.79814	0	10.947	0	14.2944	17.8869	0.323841	0	0
2000	1052	0.009708	0.021595	-119.846	0.002938	0.011252	cpx	Na0.02Ca0.72Fe''0.34Mg0.79Fe'''0.05Ti0.01Al0.17Si1.90O6	50.6727	0.25893	3.80259	1.80712	0	10.9885	0	14.2499	17.8948	0.325413	0	0
2000	1051	0.009516	0.021158	-117.438	0.002879	0.011026	cpx	Na0.02Ca0.72Fe''0.35Mg0.79Fe'''0.05Ti0.01Al0.17Si1.90O6	50.6531	0.262243	3.80328	1.81617	0	11.0301	0	14.2053	17.9028	0.326995	0	0
2000	1050	0.00933	0.020733	-115.093	0.002822	0.010806	cpx	Na0.02Ca0.72Fe''0.35Mg0.79Fe'''0.05Ti0.01Al0.17Si1.89O6	50.6334	0.2656	3.80401	1.82531	0	11.072	0	14.1604	17.9107	0.328586	0	0
2000	1049	0.009149	0.02032	-112.811	0.002766	0.010592	cpx	Na0.02Ca0.72Fe''0.35Mg0.79Fe'''0.05Ti0.01Al0.17Si1.89O6	50.6135	0.269001	3.80476	1.83452	0	11.114	0	14.1154	17.9186	0.330187	0	0
2000	1048	0.008972	0.019917	-110.59	0.002712	0.010383	cpx	Na0.02Ca0.72Fe''0.35Mg0.79Fe'''0.05Ti0.01Al0.17Si1.89O6	50.5935	0.272447	3.80555	1.84382	0	11.1562	0	14.0701	17.9265	0.331798	0	0
2000	1047	0.0088	0.019526	-108.429	0.002659	0.010181	cpx	Na0.02Ca0.72Fe''0.35Mg0.78Fe'''0.05Ti0.01Al0.17Si1.89O6	50.5733	0.275939	3.80636	1.85321	0	11.1987	0	14.0247	17.9343	0.333418	0	0
2000	1046	0.008633	0.019144	-106.325	0.002608	0.009983	cpx	Na0.02Ca0.72Fe''0.35Mg0.78Fe'''0.05Ti0.01Al0.17Si1.89O6	50.553	0.279477	3.80721	1.86268	0	11.2413	0	13.9791	17.9421	0.335048	0	0
2000	1045	0.00847	0.018774	-104.278	0.002558	0.009791	cpx	Na0.02Ca0.72Fe''0.35Mg0.78Fe'''0.05Ti0.01Al0.17Si1.89O6	50.5326	0.283063	3.80808	1.87224	0	11.2842	0	13.9333	17.9499	0.336688	0	0
2000	1044	0.008311	0.018413	-102.286	0.00251	0.009604	cpx	Na0.02Ca0.72Fe''0.36Mg0.78Fe'''0.05Ti0.01Al0.17Si1.89O6	50.5119	0.286697	3.80899	1.88188	0	11.3272	0	13.8872	17.9577	0.338338	0	0
2000	1043	0.008157	0.018062	-100.347	0.002463	0.009422	cpx	Na0.02Ca0.72Fe''0.36Mg0.77Fe'''0.05Ti0.01Al0.17Si1.89O6	50.4911	0.29038	3.80993	1.89162	0	11.3705	0	13.841	17.9654	0.339998	0	0
2000	1042	0.008007	0.017721	-98.4612	0.002417	0.009246	cpx	Na0.02Ca0.72Fe''0.36Mg0.77Fe'''0.05Ti0.01Al0.17Si1.89O6	50.4702	0.294114	3.8109	1.90145	0	11.414	0	13.7946	17.9731	0.341668	0	0
2000	1041	0.007861	0.017388	-96.6265	0.002372	0.009073	cpx	Na0.02Ca0.72Fe''0.36Mg0.77Fe'''0.05Ti0.01Al0.17Si1.89O6	50.4491	0.297898	3.81191	1.91137	0	11.4577	0	13.748	17.9807	0.343349	0	0
2000	1040	0.008003	0.017693	-98.3284	0.002414	0.009233	cpx	Na0.03Ca0.72Fe''0.36Mg0.77Fe'''0.05Ti0.01Al0.17Si1.89O6	50.4281	0.301667	3.81281	1.92126	0	11.5014	0	13.7014	17.9883	0.345031	0	0
2000	1039	0.007909	0.017476	-97.1326	0.002385	0.009121	cpx	Na0.03Ca0.72Fe''0.36Mg0.76Fe'''0.05Ti0.01Al0.17Si1.89O6	50.407	0.305471	3.81371	1.93122	0	11.5453	0	13.6547	17.9959	0.346722	0	0
2000	1038	0.007778	0.017178	-95.487	0.002345	0.008967	cpx	Na0.03Ca0.72Fe''0.36Mg0.76Fe'''0.05Ti0.01Al0.17Si1.89O6	50.3857	0.309321	3.81463	1.94126	0	11.5894	0	13.6079	18.0034	0.348422	0	0
2000	1037	0.007649	0.016884	-93.8622	0.002305	0.008815	cpx	Na0.03Ca0.72Fe''0.37Mg0.76Fe'''0.06Ti0.01Al0.17Si1.89O6	50.3643	0.313218	3.81558	1.95139	0	11.6337	0	13.5608	18.0109	0.350133	0	0
2000	1036	0.007524	0.016599	-92.2847	0.002267	0.008667	cpx	Na0.03Ca0.73Fe''0.37Mg0.76Fe'''0.06Ti0.01Al0.17Si1.89O6	50.3428	0.317163	3.81656	1.96162	0	11.6782	0	13.5135	18.0183	0.351854	0	0
2000	1035	0.007402	0.016322	-90.7535	0.00223	0.008523	cpx	Na0.03Ca0.73Fe''0.37Mg0.75Fe'''0.06Ti0.01Al0.17Si1.89O6	50.321	0.321157	3.81756	1.97194	0	11.723	0	13.466	18.0257	0.353585	0	0
2000	1034	0.007284	0.016053	-89.2676	0.002194	0.008384	cpx	Na0.03Ca0.73Fe''0.37Mg0.75Fe'''0.06Ti0.01Al0.17Si1.89O6	50.2992	0.325199	3.81859	1.98235	0	11.7679	0	13.4183	18.0331	0.355326	0	0
2000	1033	0.007169	0.015792	-87.8258	0.002158	0.008249	cpx	Na0.03Ca0.73Fe''0.37Mg0.75Fe'''0.06Ti0.01Al0.17Si1.89O6	50.2771	0.329291	3.81964	1.99286	0	11.8132	0	13.3704	18.0404	0.357078	0	0
2000	1032	0.007058	0.015539	-86.4271	0.002124	0.008118	cpx	Na0.03Ca0.73Fe''0.37Mg0.75Fe'''0.06Ti0.01Al0.17Si1.89O6	50.2549	0.333432	3.82072	2.00347	0	11.8586	0	13.3223	18.0476	0.358841	0	0
2000	1031	0.006951	0.015294	-85.0706	0.002091	0.00799	cpx	Na0.03Ca0.73Fe''0.37Mg0.74Fe'''0.06Ti0.01Al0.17Si1.89O6	50.2326	0.337623	3.82182	2.01417	0	11.9043	0	13.274	18.0549	0.360614	0	0
2000	1030	0.006846	0.015056	-83.7552	0.002059	0.007867	cpx	Na0.03Ca0.73Fe''0.38Mg0.74Fe'''0.06Ti0.01Al0.17Si1.89O6	50.21	0.341864	3.82295	2.02497	0	11.9503	0	13.2255	18.062	0.362397	0	0
2000	1029	0.006745	0.014826	-82.4799	0.002028	0.007748	cpx	Na0.03Ca0.73Fe''0.38Mg0.74Fe'''0.06Ti0.01Al0.17Si1.89O6	50.1874	0.346155	3.8241	2.03587	0	11.9964	0	13.1768	18.0691	0.364191	0	0
2000	1028	0.006647	0.014602	-81.2439	0.001998	0.007632	cpx	Na0.03Ca0.73Fe''0.38Mg0.74Fe'''0.06Ti0.01Al0.17Si1.89O6	50.1645	0.350498	3.82528	2.04687	0	12.0429	0	13.1278	18.0762	0.365996	0	0
2000	1027	0.006552	0.014386	-80.0462	0.001969	0.00752	cpx	Na0.03Ca0.73Fe''0.38Mg0.73Fe'''0.06Ti0.01Al0.17Si1.89O6	50.1415	0.354891	3.82648	2.05797	0	12.0895	0	13.0787	18.0832	0.367811	0	0
2000	1026	0.00646	0.014176	-78.8858	0.001941	0.007411	cpx	Na0.03Ca0.73Fe''0.38Mg0.73Fe'''0.06Ti0.01Al0.17Si1.89O6	50.1183	0.359335	3.8277	2.06918	0	12.1365	0	13.0293	18.0901	0.369637	0	0
2000	1025	0.006371	0.013973	-77.7619	0.001914	0.007306	cpx	Na0.03Ca0.73Fe''0.38Mg0.73Fe'''0.06Ti0.01Al0.17Si1.89O6	50.0949	0.363831	3.82894	2.08049	0	12.1836	0	12.9797	18.097	0.371475	0	0
2000	1024	0.006284	0.013777	-76.6735	0.001887	0.007204	cpx	Na0.03Ca0.73Fe''0.39Mg0.73Fe'''0.06Ti0.01Al0.17Si1.89O6	50.0714	0.368377	3.83021	2.0919	0	12.2311	0	12.9299	18.1038	0.373322	0	0
2000	1023	0.0062	0.013585	-75.6132	0.001861	0.007104	cpx	Na0.03Ca0.73Fe''0.39Mg0.72Fe'''0.06Ti0.01Al0.17Si1.89O6	50.0477	0.372975	3.83149	2.10342	0	12.2788	0	12.8798	18.1106	0.375181	0	0
2000	1022	0.006118	0.013397	-74.5724	0.001836	0.007007	cpx	Na0.03Ca0.73Fe''0.39Mg0.72Fe'''0.06Ti0.01Al0.17Si1.89O6	50.0238	0.377624	3.8328	2.11505	0	12.3267	0	12.8296	18.1173	0.377051	0	0
2000	1021	0.006038	0.013215	-73.5646	0.001812	0.006913	cpx	Na0.03Ca0.73Fe''0.39Mg0.72Fe'''0.06Ti0.01Al0.17Si1.89O6	49.9998	0.382323	3.83412	2.12678	0	12.375	0	12.7791	18.1239	0.378932	0	0
2000	1020	0.005961	0.013039	-72.5894	0.001788	0.006821	cpx	Na0.03Ca0.73Fe''0.39Mg0.72Fe'''0.06Ti0.01Al0.17Si1.89O6	49.9756	0.387074	3.83547	2.13862	0	12.4235	0	12.7284	18.1305	0.380823	0	0
2000	1019	0.005886	0.012869	-71.6459	0.001765	0.006733	cpx	Na0.03Ca0.73Fe''0.39Mg0.71Fe'''0.06Ti0.01Al0.17Si1.89O6	49.9512	0.391874	3.83682	2.15057	0	12.4722	0	12.6775	18.137	0.382726	0	0
2000	1018	0.005814	0.012705	-70.7333	0.001743	0.006648	cpx	Na0.03Ca0.73Fe''0.40Mg0.71Fe'''0.06Ti0.01Al0.17Si1.89O6	49.9267	0.396725	3.8382	2.16263	0	12.5213	0	12.6264	18.1435	0.384639	0	0
2000	1017	0.005744	0.012545	-69.8509	0.001721	0.006565	cpx	Na0.03Ca0.74Fe''0.40Mg0.71Fe'''0.06Ti0.01Al0.17Si1.89O6	49.902	0.401624	3.83959	2.1748	0	12.5706	0	12.575	18.1498	0.386563	0	0
2000	1016	0.005677	0.012392	-68.9978	0.001701	0.006485	cpx	Na0.03Ca0.74Fe''0.40Mg0.71Fe'''0.06Ti0.01Al0.17Si1.89O6	49.8771	0.406572	3.84099	2.18708	0	12.6202	0	12.5234	18.1561	0.388498	0	0
2000	1015	0.005612	0.012243	-68.1735	0.001681	0.006408	cpx	Na0.03Ca0.74Fe''0.40Mg0.70Fe'''0.06Ti0.01Al0.17Si1.89O6	49.852	0.411568	3.8424	2.19947	0	12.6701	0	12.4716	18.1624	0.390444	0	0
2000	1014	0.005549	0.012099	-67.3771	0.001661	0.006334	cpx	Na0.03Ca0.74Fe''0.40Mg0.70Fe'''0.06Ti0.01Al0.17Si1.89O6	49.8268	0.416611	3.84382	2.21197	0	12.7203	0	12.4196	18.1685	0.392401	0	0
2000	1013	0.005489	0.011961	-66.608	0.001643	0.006262	cpx	Na0.03Ca0.74Fe''0.40Mg0.70Fe'''0.06Ti0.01Al0.17Si1.89O6	49.8014	0.4217	3.84526	2.22458	0	12.7708	0	12.3673	18.1746	0.394369	0	0
2000	1012	0.00543	0.011827	-65.8659	0.001625	0.006193	cpx	Na0.03Ca0.74Fe''0.41Mg0.70Fe'''0.06Ti0.01Al0.17Si1.88O6	49.7759	0.426833	3.84669	2.23731	0	12.8215	0	12.3149	18.1806	0.396347	0	0
2000	1011	0.005374	0.011698	-65.1501	0.001607	0.006126	cpx	Na0.03Ca0.74Fe''0.41Mg0.69Fe'''0.06Ti0.01Al0.17Si1.88O6	49.7502	0.432009	3.84813	2.25014	0	12.8726	0	12.2622	18.1865	0.398336	0	0
2000	1010	0.00532	0.011574	-64.4604	0.001591	0.006061	cpx	Na0.03Ca0.74Fe''0.41Mg0.69Fe'''0.06Ti0.01Al0.17Si1.88O6	49.7243	0.437226	3.84958	2.26309	0	12.924	0	12.2092	18.1923	0.400336	0	0
2000	1009	0.005268	0.011455	-63.7968	0.001575	0.005999	cpx	Na0.03Ca0.74Fe''0.41Mg0.69Fe'''0.06Ti0.01Al0.17Si1.88O6	49.6983	0.442483	3.85102	2.27614	0	12.9756	0	12.1561	18.198	0.402345	0	0
2000	1008	0.005218	0.01134	-63.1595	0.001559	0.00594	cpx	Na0.03Ca0.74Fe''0.41Mg0.68Fe'''0.07Ti0.01Al0.17Si1.88O6	49.6721	0.447777	3.85245	2.28931	0	13.0276	0	12.1028	18.2036	0.404365	0	0
2000	1007	0.00517	0.01123	-62.5492	0.001545	0.005883	cpx	Na0.03Ca0.74Fe''0.41Mg0.68Fe'''0.07Ti0.01Al0.17Si1.88O6	49.6458	0.453104	3.85388	2.30259	0	13.0799	0	12.0492	18.2092	0.406396	0	0
2000	1006	0.005125	0.011125	-61.9674	0.001531	0.005829	cpx	Na0.03Ca0.74Fe''0.42Mg0.68Fe'''0.07Ti0.01Al0.17Si1.88O6	49.6193	0.458462	3.8553	2.31597	0	13.1325	0	11.9954	18.2146	0.408435	0	0
2000	1005	0.005082	0.011026	-61.4168	0.001517	0.005777	cpx	Na0.03Ca0.74Fe''0.42Mg0.68Fe'''0.07Ti0.01Al0.17Si1.88O6	49.5927	0.463846	3.8567	2.32946	0	13.1854	0	11.9415	18.2199	0.410485	0	0
2000	1004	0.005042	0.010934	-60.9019	0.001505	0.00573	cpx	Na0.03Ca0.74Fe''0.42Mg0.67Fe'''0.07Ti0.01Al0.17Si1.88O6	49.566	0.469251	3.85808	2.34304	0	13.2386	0	11.8873	18.2252	0.412543	0	0
2000	1003	0.005006	0.010849	-60.4311	0.001494	0.005686	cpx	Na0.03Ca0.74Fe''0.42Mg0.67Fe'''0.07Ti0.01Al0.17Si1.88O6	49.5392	0.474668	3.85942	2.35673	0	13.2921	0	11.833	18.2303	0.41461	0	0
2000	1002	0.004975	0.010775	-60.0197	0.001484	0.005648	cpx	Na0.03Ca0.74Fe''0.42Mg0.67Fe'''0.07Ti0.01Al0.17Si1.88O6	49.5123	0.480086	3.86072	2.3705	0	13.346	0	11.7785	18.2353	0.416685	0	0
2000	1001	0.004951	0.010717	-59.6984	0.001476	0.005618	cpx	Na0.03Ca0.74Fe''0.43Mg0.66Fe'''0.07Ti0.01Al0.17Si1.88O6	49.4853	0.485488	3.86195	2.38434	0	13.4002	0	11.7238	18.2401	0.418765	0	0
2000	1000	0.00494	0.010688	-59.5366	0.001472	0.005603	cpx	Na0.03Ca0.74Fe''0.43Mg0.66Fe'''0.07Ti0.01Al0.17Si1.88O6	49.4584	0.49084	3.86308	2.39822	0	13.4547	0	11.6691	18.2448	0.420849	0	0
2000	999	0.004958	0.010722	-59.7245	0.001477	0.005621	cpx	Na0.03Ca0.74Fe''0.43Mg0.66Fe'''0.07Ti0.01Al0.17Si1.88O6	49.4317	0.496071	3.86403	2.41207	0	13.5094	0	11.6145	18.2493	0.422931	0	0
2000	998	0.005066	0.010949	-60.9904	0.001509	0.005741	cpx	Na0.03Ca0.74Fe''0.43Mg0.66Fe'''0.07Ti0.01Al0.17Si1.88O6	49.4057	0.500957	3.86454	2.42567	0	13.5643	0	11.5604	18.2535	0.424991	0	0
2000	997	0.004185	0.00904	-50.3533	0.001246	0.00474	cpx	Na0.03Ca0.74Fe''0.43Mg0.65Fe'''0.07Ti0.01Al0.17Si1.88O6	49.375	0.507835	3.86727	2.44134	0	13.6207	0	11.502	18.2586	0.427226	0	0
2000	996	0.009529	0.020572	-114.607	0.002837	0.01079	cpx	Na0.03Ca0.74Fe''0.44Mg0.65Fe'''0.07Ti0.01Al0.17Si1.88O6	49.3746	0.501656	3.85521	2.44419	0	13.6697	0	11.4699	18.2563	0.428373	0	0
2000	995	0.009363	0.020203	-112.567	0.002787	0.010599	cpx	Na0.03Ca0.74Fe''0.44Mg0.65Fe'''0.07Ti0.01Al0.17Si1.88O6	49.3742	0.495515	3.8432	2.44707	0	13.719	0	11.4375	18.254	0.429523	0	0
2000	994	0.009202	0.019846	-110.59	0.002739	0.010413	cpx	Na0.03Ca0.74Fe''0.44Mg0.65Fe'''0.07Ti0.01Al0.17Si1.88O6	49.3736	0.48941	3.83124	2.44998	0	13.7684	0	11.405	18.2516	0.430678	0	0
2000	993	0.009047	0.0195	-108.676	0.002692	0.010234	cpx	Na0.03Ca0.74Fe''0.44Mg0.65Fe'''0.07Ti0.01Al0.17Si1.88O6	49.3729	0.483343	3.81932	2.45293	0	13.818	0	11.3724	18.2493	0.431837	0	0
2000	992	0.008896	0.019164	-106.822	0.002646	0.01006	cpx	Na0.03Ca0.75Fe''0.44Mg0.64Fe'''0.07Ti0.01Al0.17Si1.88O6	49.3721	0.477313	3.80744	2.45591	0	13.8677	0	11.3396	18.2468	0.433	0	0
2000	991	0.008749	0.01884	-105.026	0.002602	0.009891	cpx	Na0.03Ca0.75Fe''0.44Mg0.64Fe'''0.07Ti0.01Al0.17Si1.88O6	49.3712	0.47132	3.79561	2.45893	0	13.9177	0	11.3067	18.2444	0.434167	0	0
2000	990	0.008608	0.018525	-103.286	0.00256	0.009728	cpx	Na0.03Ca0.75Fe''0.45Mg0.64Fe'''0.07Ti0.01Al0.17Si1.88O6	49.3702	0.465362	3.78382	2.46198	0	13.9678	0	11.2736	18.2419	0.435338	0	0
2000	989	0.008471	0.01822	-101.601	0.002518	0.00957	cpx	Na0.03Ca0.75Fe''0.45Mg0.64Fe'''0.07Ti0.01Al0.17Si1.88O6	49.369	0.459442	3.77207	2.46507	0	14.0181	0	11.2404	18.2394	0.436514	0	0
2000	988	0.008338	0.017926	-99.9697	0.002478	0.009417	cpx	Na0.03Ca0.75Fe''0.45Mg0.64Fe'''0.07Ti0.01Al0.17Si1.88O6	49.3678	0.453557	3.76036	2.46819	0	14.0686	0	11.207	18.2369	0.437693	0	0
2000	987	0.00821	0.01764	-98.3897	0.00244	0.009269	cpx	Na0.03Ca0.75Fe''0.45Mg0.64Fe'''0.07Ti0.01Al0.17Si1.88O6	49.3664	0.447708	3.7487	2.47135	0	14.1192	0	11.1735	18.2343	0.438877	0	0
2000	986	0.008085	0.017363	-96.8599	0.002402	0.009125	cpx	Na0.03Ca0.75Fe''0.45Mg0.63Fe'''0.07Ti0.01Al0.17Si1.88O6	49.3649	0.441894	3.73707	2.47454	0	14.1701	0	11.1398	18.2317	0.440066	0	0
2000	985	0.007965	0.017096	-95.3788	0.002366	0.008986	cpx	Na0.03Ca0.75Fe''0.45Mg0.63Fe'''0.07Ti0.01Al0.17Si1.88O6	49.3633	0.436116	3.72549	2.47777	0	14.2211	0	11.106	18.229	0.441258	0	0
2000	984	0.007848	0.016837	-93.9451	0.002331	0.008852	cpx	Na0.03Ca0.75Fe''0.46Mg0.63Fe'''0.07Ti0.01Al0.17Si1.88O6	49.3615	0.430374	3.71395	2.48103	0	14.2723	0	11.072	18.2263	0.442455	0	0
2000	983	0.007735	0.016586	-92.5572	0.002297	0.008722	cpx	Na0.03Ca0.75Fe''0.46Mg0.63Fe'''0.07Ti0.01Al0.17Si1.89O6	49.3597	0.424666	3.70244	2.48433	0	14.3238	0	11.0378	18.2236	0.443656	0	0
2000	982	0.007626	0.016343	-91.2141	0.002264	0.008596	cpx	Na0.03Ca0.75Fe''0.46Mg0.63Fe'''0.07Ti0.01Al0.17Si1.89O6	49.3577	0.418994	3.69098	2.48766	0	14.3754	0	11.0036	18.2208	0.444862	0	0
2000	981	0.007521	0.016108	-89.9143	0.002232	0.008474	cpx	Na0.03Ca0.75Fe''0.46Mg0.62Fe'''0.07Ti0.01Al0.17Si1.89O6	49.3556	0.413356	3.67955	2.49103	0	14.4272	0	10.9691	18.218	0.446071	0	0
2000	980	0.007419	0.015881	-88.6568	0.002201	0.008356	cpx	Na0.03Ca0.75Fe''0.46Mg0.62Fe'''0.07Ti0.01Al0.17Si1.89O6	49.3534	0.407754	3.66816	2.49444	0	14.4792	0	10.9345	18.2152	0.447285	0	0
2000	979	0.00732	0.015661	-87.4402	0.002171	0.008242	cpx	Na0.03Ca0.75Fe''0.46Mg0.62Fe'''0.07Ti0.01Al0.16Si1.89O6	49.3511	0.402186	3.65681	2.49788	0	14.5314	0	10.8998	18.2123	0.448504	0	0
2000	978	0.007224	0.015449	-86.2636	0.002143	0.008132	cpx	Na0.03Ca0.75Fe''0.47Mg0.62Fe'''0.07Ti0.01Al0.16Si1.89O6	49.3487	0.396652	3.6455	2.50135	0	14.5838	0	10.8649	18.2094	0.449727	0	0
2000	977	0.007132	0.015243	-85.1257	0.002115	0.008025	cpx	Na0.03Ca0.75Fe''0.47Mg0.62Fe'''0.07Ti0.01Al0.16Si1.89O6	49.3462	0.391153	3.63422	2.50486	0	14.6363	0	10.8299	18.2064	0.450954	0	0
2000	976	0.007043	0.015045	-84.0256	0.002088	0.007922	cpx	Na0.03Ca0.75Fe''0.47Mg0.62Fe'''0.07Ti0.01Al0.16Si1.89O6	49.3435	0.385688	3.62298	2.50841	0	14.6891	0	10.7947	18.2034	0.452185	0	0
2000	975	0.006957	0.014853	-82.9622	0.002062	0.007823	cpx	Na0.03Ca0.75Fe''0.47Mg0.61Fe'''0.07Ti0.01Al0.16Si1.89O6	49.3407	0.380258	3.61177	2.51199	0	14.7421	0	10.7594	18.2004	0.453421	0	0
2000	974	0.006873	0.014667	-81.9345	0.002037	0.007726	cpx	Na0.03Ca0.75Fe''0.47Mg0.61Fe'''0.07Ti0.01Al0.16Si1.89O6	49.3378	0.374861	3.6006	2.51561	0	14.7953	0	10.7239	18.1973	0.454661	0	0
2000	973	0.006793	0.014488	-80.9416	0.002013	0.007633	cpx	Na0.03Ca0.75Fe''0.48Mg0.61Fe'''0.07Ti0.01Al0.16Si1.89O6	49.3349	0.369499	3.58946	2.51927	0	14.8486	0	10.6882	18.1942	0.455906	0	0
2000	972	0.006716	0.014314	-79.9826	0.001989	0.007544	cpx	Na0.03Ca0.75Fe''0.48Mg0.61Fe'''0.07Ti0.01Al0.16Si1.89O6	49.3317	0.364171	3.57836	2.52295	0	14.9022	0	10.6524	18.191	0.457155	0	0
2000	971	0.006641	0.014147	-79.0566	0.001967	0.007457	cpx	Na0.03Ca0.75Fe''0.48Mg0.61Fe'''0.07Ti0.01Al0.16Si1.89O6	49.3285	0.358876	3.56729	2.52668	0	14.956	0	10.6165	18.1878	0.458409	0	0
2000	970	0.006568	0.013986	-78.1627	0.001945	0.007373	cpx	Na0.03Ca0.75Fe''0.48Mg0.60Fe'''0.07Ti0.01Al0.16Si1.89O6	49.3252	0.353616	3.55625	2.53044	0	15.0099	0	10.5804	18.1845	0.459667	0	0
2000	969	0.006499	0.01383	-77.3	0.001924	0.007293	cpx	Na0.03Ca0.75Fe''0.48Mg0.60Fe'''0.07Ti0.01Al0.16Si1.89O6	49.3217	0.34839	3.54525	2.53423	0	15.0641	0	10.5442	18.1812	0.46093	0	0
2000	968	0.006432	0.01368	-76.4679	0.001903	0.007215	cpx	Na0.03Ca0.75Fe''0.48Mg0.60Fe'''0.07Ti0.01Al0.16Si1.89O6	49.3182	0.343197	3.53428	2.53806	0	15.1185	0	10.5078	18.1778	0.462197	0	0
2000	967	0.006367	0.013535	-75.6655	0.001884	0.00714	cpx	Na0.03Ca0.75Fe''0.49Mg0.60Fe'''0.07Ti0.01Al0.16Si1.89O6	49.3145	0.338039	3.52334	2.54193	0	15.173	0	10.4713	18.1744	0.463468	0	0
2000	966	0.006305	0.013395	-74.8921	0.001865	0.007067	cpx	Na0.03Ca0.75Fe''0.49Mg0.60Fe'''0.07Ti0.01Al0.16Si1.89O6	49.3107	0.332914	3.51243	2.54583	0	15.2278	0	10.4346	18.1709	0.464744	0	0
2000	965	0.006245	0.013261	-74.1469	0.001847	0.006998	cpx	Na0.03Ca0.75Fe''0.49Mg0.59Fe'''0.07Ti0.01Al0.16Si1.89O6	49.3069	0.327824	3.50155	2.54976	0	15.2828	0	10.3978	18.1674	0.466024	0	0
2000	964	0.006187	0.013131	-73.4293	0.001829	0.006931	cpx	Na0.03Ca0.75Fe''0.49Mg0.59Fe'''0.07Ti0.01Al0.16Si1.89O6	49.3029	0.322767	3.4907	2.55373	0	15.3379	0	10.3608	18.1638	0.467309	0	0
2000	963	0.006132	0.013006	-72.7386	0.001812	0.006866	cpx	Na0.03Ca0.75Fe''0.49Mg0.59Fe'''0.07Ti0.01Al0.16Si1.89O6	49.2988	0.317744	3.47988	2.55773	0	15.3933	0	10.3237	18.1602	0.468598	0	0
2000	962	0.006079	0.012886	-72.0741	0.001796	0.006804	cpx	Na0.03Ca0.75Fe''0.50Mg0.59Fe'''0.07Ti0.01Al0.16Si1.89O6	49.2946	0.312755	3.4691	2.56177	0	15.4489	0	10.2865	18.1566	0.469892	0	0
2000	961	0.006027	0.012771	-71.4352	0.001781	0.006744	cpx	Na0.04Ca0.75Fe''0.50Mg0.59Fe'''0.07Ti0.01Al0.16Si1.89O6	49.2902	0.307799	3.45833	2.56584	0	15.5046	0	10.2491	18.1529	0.471191	0	0
2000	960	0.005978	0.01266	-70.8213	0.001766	0.006687	cpx	Na0.04Ca0.75Fe''0.50Mg0.58Fe'''0.07Ti0.01Al0.16Si1.89O6	49.2858	0.302878	3.4476	2.56994	0	15.5606	0	10.2116	18.1491	0.472493	0	0
2000	959	0.005931	0.012553	-70.2319	0.001752	0.006632	cpx	Na0.04Ca0.75Fe''0.50Mg0.58Fe'''0.07Ti0.01Al0.16Si1.89O6	49.2813	0.297991	3.4369	2.57407	0	15.6167	0	10.1739	18.1453	0.473801	0	0
2000	958	0.005886	0.012451	-69.6663	0.001738	0.006579	cpx	Na0.04Ca0.75Fe''0.50Mg0.58Fe'''0.07Ti0.01Al0.16Si1.89O6	49.2767	0.293138	3.42622	2.57824	0	15.6731	0	10.1361	18.1414	0.475112	0	0
2000	957	0.005843	0.012353	-69.124	0.001725	0.006529	cpx	Na0.04Ca0.75Fe''0.51Mg0.58Fe'''0.07Ti0.01Al0.15Si1.89O6	49.2719	0.288319	3.41557	2.58244	0	15.7296	0	10.0981	18.1375	0.476429	0	0
2000	956	0.005802	0.012259	-68.6045	0.001712	0.006481	cpx	Na0.04Ca0.75Fe''0.51Mg0.58Fe'''0.07Ti0.01Al0.15Si1.90O6	49.2671	0.283534	3.40494	2.58667	0	15.7864	0	10.0601	18.1336	0.477749	0	0
2000	955	0.005763	0.012169	-68.1072	0.0017	0.006434	cpx	Na0.04Ca0.75Fe''0.51Mg0.57Fe'''0.08Ti0.01Al0.15Si1.90O6	49.2621	0.278784	3.39435	2.59093	0	15.8433	0	10.0219	18.1296	0.479075	0	0
2000	954	0.005725	0.012084	-67.6317	0.001689	0.00639	cpx	Na0.04Ca0.75Fe''0.51Mg0.57Fe'''0.08Ti0.01Al0.15Si1.90O6	49.2571	0.274068	3.38377	2.59523	0	15.9004	0	9.98352	18.1255	0.480404	0	0
2000	953	0.00569	0.012001	-67.1775	0.001678	0.006348	cpx	Na0.04Ca0.75Fe''0.51Mg0.57Fe'''0.08Ti0.01Al0.15Si1.90O6	49.252	0.269387	3.37322	2.59955	0	15.9577	0	9.94505	18.1214	0.481738	0	0
2000	952	0.005656	0.011923	-66.7442	0.001667	0.006308	cpx	Na0.04Ca0.75Fe''0.52Mg0.57Fe'''0.08Ti0.01Al0.15Si1.90O6	49.2467	0.26474	3.3627	2.6039	0	16.0152	0	9.90645	18.1172	0.483077	0	0
2000	951	0.005623	0.011848	-66.3312	0.001657	0.006269	cpx	Na0.04Ca0.75Fe''0.52Mg0.57Fe'''0.08Ti0.01Al0.15Si1.90O6	49.2414	0.260127	3.3522	2.60828	0	16.0729	0	9.86773	18.113	0.48442	0	0
2000	950	0.005593	0.011777	-65.9383	0.001648	0.006233	cpx	Na0.04Ca0.75Fe''0.52Mg0.56Fe'''0.08Ti0.01Al0.15Si1.90O6	49.2359	0.25555	3.34172	2.61269	0	16.1307	0	9.82888	18.1088	0.485768	0	0
2000	949	0.005564	0.01171	-65.5648	0.001639	0.006198	cpx	Na0.04Ca0.75Fe''0.52Mg0.56Fe'''0.08Ti0.01Al0.15Si1.90O6	49.2304	0.251008	3.33126	2.61712	0	16.1887	0	9.78991	18.1044	0.48712	0	0
2000	948	0.005536	0.011646	-65.2105	0.001631	0.006165	cpx	Na0.04Ca0.75Fe''0.52Mg0.56Fe'''0.08Ti0.01Al0.15Si1.90O6	49.2248	0.2465	3.32083	2.62159	0	16.2469	0	9.75083	18.1001	0.488476	0	0
2000	947	0.005511	0.011585	-64.875	0.001623	0.006134	cpx	Na0.04Ca0.75Fe''0.53Mg0.56Fe'''0.08Ti0.01Al0.15Si1.90O6	49.2191	0.242028	3.31042	2.62607	0	16.3053	0	9.71162	18.0957	0.489837	0	0
2000	946	0.005486	0.011527	-64.5578	0.001615	0.006105	cpx	Na0.04Ca0.75Fe''0.53Mg0.56Fe'''0.08Ti0.01Al0.15Si1.90O6	49.2132	0.237591	3.30003	2.63059	0	16.3638	0	9.67231	18.0912	0.491202	0	0
2000	945	0.005464	0.011473	-64.2587	0.001608	0.006078	cpx	Na0.04Ca0.75Fe''0.53Mg0.55Fe'''0.08Ti0.01Al0.15Si1.90O6	49.2073	0.23319	3.28966	2.63512	0	16.4226	0	9.63288	18.0867	0.492571	0	0
2000	944	0.005443	0.011422	-63.9772	0.001601	0.006052	cpx	Na0.04Ca0.75Fe''0.53Mg0.55Fe'''0.08Ti0.01Al0.15Si1.90O6	49.2014	0.228824	3.27931	2.63969	0	16.4814	0	9.59334	18.0821	0.493945	0	0
2000	943	0.005423	0.011374	-63.7131	0.001595	0.006027	cpx	Na0.04Ca0.75Fe''0.53Mg0.55Fe'''0.08Ti0.01Al0.15Si1.90O6	49.1953	0.224494	3.26898	2.64427	0	16.5404	0	9.5537	18.0775	0.495323	0	0
2000	942	0.005404	0.011329	-63.4659	0.001589	0.006005	cpx	Na0.04Ca0.75Fe''0.54Mg0.55Fe'''0.08Ti0.01Al0.15Si1.90O6	49.1891	0.220201	3.25867	2.64887	0	16.5996	0	9.51396	18.0728	0.496705	0	0
2000	941	0.005388	0.011287	-63.2354	0.001584	0.005984	cpx	Na0.04Ca0.75Fe''0.54Mg0.55Fe'''0.08Ti0.01Al0.15Si1.90O6	49.1829	0.215943	3.24838	2.6535	0	16.659	0	9.47412	18.0681	0.498092	0	0
2000	940	0.005372	0.011248	-63.0213	0.001579	0.005964	cpx	Na0.04Ca0.75Fe''0.54Mg0.54Fe'''0.08Ti0.01Al0.15Si1.90O6	49.1766	0.211722	3.2381	2.65814	0	16.7184	0	9.43418	18.0634	0.499483	0	0
2000	939	0.005358	0.011212	-62.8233	0.001574	0.005946	cpx	Na0.04Ca0.75Fe''0.54Mg0.54Fe'''0.08Ti0.01Al0.15Si1.90O6	49.1702	0.207538	3.22785	2.66281	0	16.778	0	9.39415	18.0586	0.500878	0	0
2000	938	0.005345	0.011179	-62.641	0.00157	0.00593	cpx	Na0.04Ca0.75Fe''0.54Mg0.54Fe'''0.08Ti0.01Al0.15Si1.90O6	49.1637	0.20339	3.21761	2.66748	0	16.8378	0	9.35404	18.0537	0.502277	0	0
2000	937	0.005334	0.011149	-62.4742	0.001566	0.005915	cpx	Na0.04Ca0.75Fe''0.55Mg0.54Fe'''0.08Ti0.01Al0.15Si1.90O6	49.1571	0.19928	3.20738	2.67218	0	16.8977	0	9.31384	18.0488	0.503681	0	0
2000	936	0.005323	0.011121	-62.3227	0.001563	0.005901	cpx	Na0.04Ca0.75Fe''0.55Mg0.53Fe'''0.08Ti0.01Al0.15Si1.90O6	49.1505	0.195207	3.19717	2.67689	0	16.9577	0	9.27356	18.0439	0.505088	0	0
2000	935	0.005314	0.011096	-62.1861	0.00156	0.005889	cpx	Na0.04Ca0.75Fe''0.55Mg0.53Fe'''0.08Ti0.01Al0.15Si1.90O6	49.1438	0.191171	3.18698	2.68161	0	17.0178	0	9.2332	18.0389	0.5065	0	0
2000	934	0.005307	0.011073	-62.0641	0.001557	0.005878	cpx	Na0.04Ca0.75Fe''0.55Mg0.53Fe'''0.08Ti0.01Al0.14Si1.90O6	49.137	0.187173	3.1768	2.68634	0	17.078	0	9.19278	18.0339	0.507915	0	0
2000	933	0.0053	0.011053	-61.9566	0.001555	0.005869	cpx	Na0.04Ca0.75Fe''0.55Mg0.53Fe'''0.08Ti0.01Al0.14Si1.90O6	49.1302	0.183214	3.16664	2.69109	0	17.1384	0	9.15228	18.0289	0.509335	0	0
clinopyroxene_1	thermodynamic	data	and	composition:
Pressure	Temperature	mass	S	H	V	Cp	structure	formula	SiO2	TiO2	Al2O3	Fe2O3	Cr2O3	FeO	MnO	MgO	CaO	Na2O	K2O	H2O
2000	1156	0.239334	0.569911	-2977.73	0.073694	0.293675	cpx	Na0.01Ca0.27Fe''0.36Mg1.29Fe'''0.02Ti0.00Al0.13Si1.92O6	53.2561	0.0302381	3.11814	0.866861	0	11.7859	0	23.8574	6.99073	0.094592	0	0
2000	1155	0.242885	0.578095	-3020.45	0.074766	0.297924	cpx	Na0.01Ca0.27Fe''0.36Mg1.28Fe'''0.02Ti0.00Al0.13Si1.92O6	53.2393	0.0306259	3.11613	0.870183	0	11.8485	0	23.8118	6.98853	0.0949565	0	0
2000	1154	0.238229	0.566745	-2961.1	0.073312	0.292106	cpx	Na0.01Ca0.27Fe''0.36Mg1.28Fe'''0.02Ti0.00Al0.13Si1.92O6	53.2224	0.0310149	3.11412	0.873502	0	11.9112	0	23.7662	6.98616	0.095319	0	0
2000	1153	0.233706	0.555722	-2903.46	0.071899	0.286455	cpx	Na0.01Ca0.27Fe''0.36Mg1.28Fe'''0.02Ti0.00Al0.13Si1.92O6	53.2055	0.031405	3.11211	0.876817	0	11.9741	0	23.7208	6.98361	0.0956795	0	0
2000	1152	0.229311	0.545013	-2847.46	0.070527	0.280964	cpx	Na0.01Ca0.27Fe''0.36Mg1.28Fe'''0.02Ti0.00Al0.13Si1.92O6	53.1887	0.0317962	3.11009	0.880129	0	12.0371	0	23.6753	6.98089	0.0960381	0	0
2000	1151	0.225038	0.534606	-2793.04	0.069193	0.275629	cpx	Na0.01Ca0.27Fe''0.37Mg1.27Fe'''0.02Ti0.00Al0.13Si1.92O6	53.1718	0.0321884	3.10807	0.883439	0	12.1002	0	23.6299	6.97801	0.0963947	0	0
2000	1150	0.220885	0.52449	-2740.14	0.067896	0.270442	cpx	Na0.01Ca0.27Fe''0.37Mg1.27Fe'''0.02Ti0.00Al0.13Si1.92O6	53.1549	0.0325817	3.10604	0.886746	0	12.1635	0	23.5846	6.97495	0.0967494	0	0
2000	1149	0.216845	0.514654	-2688.7	0.066635	0.265398	cpx	Na0.01Ca0.27Fe''0.37Mg1.27Fe'''0.02Ti0.00Al0.13Si1.92O6	53.138	0.0329761	3.10401	0.890051	0	12.2269	0	23.5392	6.97173	0.0971022	0	0
2000	1148	0.212915	0.505087	-2638.66	0.065408	0.260492	cpx	Na0.01Ca0.27Fe''0.37Mg1.27Fe'''0.02Ti0.00Al0.13Si1.92O6	53.1211	0.0333715	3.10198	0.893354	0	12.2905	0	23.494	6.96834	0.097453	0	0
2000	1147	0.20909	0.495779	-2589.98	0.064215	0.255719	cpx	Na0.01Ca0.27Fe''0.37Mg1.27Fe'''0.02Ti0.00Al0.13Si1.92O6	53.1042	0.0337678	3.09994	0.896655	0	12.3542	0	23.4487	6.96479	0.0978019	0	0
2000	1146	0.205367	0.486721	-2542.6	0.063053	0.251074	cpx	Na0.01Ca0.27Fe''0.38Mg1.26Fe'''0.02Ti0.00Al0.13Si1.92O6	53.0872	0.0341652	3.09789	0.899955	0	12.4181	0	23.4035	6.96107	0.0981489	0	0
2000	1145	0.201743	0.477904	-2496.48	0.061922	0.246552	cpx	Na0.01Ca0.27Fe''0.38Mg1.26Fe'''0.02Ti0.00Al0.13Si1.92O6	53.0703	0.0345636	3.09584	0.903254	0	12.4821	0	23.3583	6.95719	0.098494	0	0
2000	1144	0.198213	0.469319	-2451.57	0.060821	0.242149	cpx	Na0.01Ca0.27Fe''0.38Mg1.26Fe'''0.02Ti0.00Al0.13Si1.92O6	53.0533	0.0349629	3.09379	0.906552	0	12.5463	0	23.3131	6.95315	0.0988371	0	0
2000	1143	0.194775	0.460958	-2407.84	0.059748	0.237861	cpx	Na0.01Ca0.27Fe''0.38Mg1.26Fe'''0.02Ti0.00Al0.13Si1.92O6	53.0363	0.0353631	3.09173	0.909849	0	12.6107	0	23.2679	6.94894	0.0991784	0	0
2000	1142	0.191424	0.452813	-2365.23	0.058703	0.233683	cpx	Na0.01Ca0.27Fe''0.38Mg1.26Fe'''0.02Ti0.00Al0.13Si1.92O6	53.0193	0.0357643	3.08967	0.913146	0	12.6752	0	23.2228	6.94458	0.0995178	0	0
2000	1141	0.188159	0.444876	-2323.7	0.057685	0.229612	cpx	Na0.01Ca0.27Fe''0.39Mg1.25Fe'''0.03Ti0.00Al0.13Si1.92O6	53.0023	0.0361664	3.0876	0.916443	0	12.74	0	23.1776	6.94006	0.0998552	0	0
2000	1140	0.184975	0.437141	-2283.23	0.056692	0.225644	cpx	Na0.01Ca0.27Fe''0.39Mg1.25Fe'''0.03Ti0.00Al0.13Si1.92O6	52.9853	0.0365693	3.08553	0.919739	0	12.8048	0	23.1325	6.93538	0.100191	0	0
2000	1139	0.181871	0.4296	-2243.78	0.055725	0.221775	cpx	Na0.01Ca0.27Fe''0.39Mg1.25Fe'''0.03Ti0.00Al0.13Si1.92O6	52.9682	0.0369732	3.08346	0.923037	0	12.8699	0	23.0873	6.93055	0.100524	0	0
2000	1138	0.178844	0.422247	-2205.3	0.054781	0.218003	cpx	Na0.01Ca0.27Fe''0.39Mg1.25Fe'''0.03Ti0.00Al0.13Si1.92O6	52.9511	0.0373779	3.08138	0.926335	0	12.9352	0	23.0422	6.92556	0.100856	0	0
2000	1137	0.17589	0.415076	-2167.77	0.05386	0.214323	cpx	Na0.01Ca0.27Fe''0.40Mg1.25Fe'''0.03Ti0.00Al0.13Si1.92O6	52.934	0.0377834	3.0793	0.929633	0	13.0006	0	22.9971	6.92042	0.101186	0	0
2000	1136	0.173009	0.40808	-2131.16	0.052962	0.210733	cpx	Na0.01Ca0.27Fe''0.40Mg1.24Fe'''0.03Ti0.00Al0.13Si1.92O6	52.9169	0.0381898	3.07721	0.932933	0	13.0662	0	22.9519	6.91513	0.101514	0	0
2000	1135	0.170196	0.401253	-2095.43	0.052086	0.207231	cpx	Na0.01Ca0.27Fe''0.40Mg1.24Fe'''0.03Ti0.00Al0.13Si1.92O6	52.8997	0.038597	3.07512	0.936235	0	13.132	0	22.9068	6.90969	0.10184	0	0
2000	1134	0.167451	0.394591	-2060.56	0.05123	0.203812	cpx	Na0.01Ca0.27Fe''0.40Mg1.24Fe'''0.03Ti0.00Al0.13Si1.92O6	52.8825	0.039005	3.07303	0.939538	0	13.1981	0	22.8616	6.90409	0.102165	0	0
2000	1133	0.16477	0.388087	-2026.52	0.050395	0.200474	cpx	Na0.01Ca0.27Fe''0.40Mg1.24Fe'''0.03Ti0.00Al0.13Si1.92O6	52.8653	0.0394138	3.07093	0.942843	0	13.2643	0	22.8164	6.89835	0.102487	0	0
2000	1132	0.162152	0.381737	-1993.28	0.049579	0.197215	cpx	Na0.01Ca0.27Fe''0.41Mg1.24Fe'''0.03Ti0.00Al0.13Si1.92O6	52.8481	0.0398234	3.06883	0.94615	0	13.3307	0	22.7712	6.89245	0.102808	0	0
2000	1131	0.159595	0.375536	-1960.82	0.048783	0.194032	cpx	Na0.01Ca0.27Fe''0.41Mg1.23Fe'''0.03Ti0.00Al0.13Si1.92O6	52.8308	0.0402337	3.06672	0.94946	0	13.3973	0	22.726	6.88641	0.103126	0	0
2000	1130	0.157096	0.369479	-1929.11	0.048005	0.190923	cpx	Na0.01Ca0.27Fe''0.41Mg1.23Fe'''0.03Ti0.00Al0.13Si1.92O6	52.8135	0.0406447	3.06461	0.952773	0	13.4641	0	22.6807	6.88023	0.103443	0	0
2000	1129	0.154655	0.363561	-1898.13	0.047244	0.187886	cpx	Na0.01Ca0.27Fe''0.41Mg1.23Fe'''0.03Ti0.00Al0.13Si1.92O6	52.7962	0.0410565	3.0625	0.956088	0	13.5311	0	22.6354	6.8739	0.103758	0	0
2000	1128	0.152269	0.357779	-1867.86	0.046501	0.184917	cpx	Na0.01Ca0.27Fe''0.41Mg1.23Fe'''0.03Ti0.00Al0.13Si1.92O6	52.7788	0.041469	3.06038	0.959407	0	13.5983	0	22.5901	6.86743	0.104071	0	0
2000	1127	0.149936	0.352128	-1838.26	0.045775	0.182016	cpx	Na0.01Ca0.27Fe''0.42Mg1.23Fe'''0.03Ti0.00Al0.13Si1.92O6	52.7614	0.0418821	3.05826	0.962729	0	13.6658	0	22.5447	6.86081	0.104382	0	0
2000	1126	0.147655	0.346604	-1809.34	0.045065	0.17918	cpx	Na0.01Ca0.27Fe''0.42Mg1.22Fe'''0.03Ti0.00Al0.13Si1.92O6	52.744	0.042296	3.05614	0.966056	0	13.7334	0	22.4993	6.85405	0.104691	0	0
2000	1125	0.145425	0.341202	-1781.05	0.044371	0.176406	cpx	Na0.01Ca0.27Fe''0.42Mg1.22Fe'''0.03Ti0.00Al0.13Si1.92O6	52.7265	0.0427105	3.05401	0.969386	0	13.8013	0	22.4539	6.84715	0.104998	0	0
2000	1124	0.143243	0.335921	-1753.39	0.043692	0.173694	cpx	Na0.01Ca0.27Fe''0.42Mg1.22Fe'''0.03Ti0.00Al0.13Si1.92O6	52.709	0.0431256	3.05188	0.97272	0	13.8694	0	22.4084	6.84011	0.105304	0	0
2000	1123	0.141109	0.330755	-1726.34	0.043028	0.171042	cpx	Na0.01Ca0.27Fe''0.43Mg1.22Fe'''0.03Ti0.00Al0.13Si1.92O6	52.6914	0.0435414	3.04975	0.976059	0	13.9378	0	22.3629	6.83294	0.105607	0	0
2000	1122	0.139021	0.325702	-1699.87	0.042378	0.168446	cpx	Na0.01Ca0.27Fe''0.43Mg1.21Fe'''0.03Ti0.00Al0.13Si1.92O6	52.6739	0.0439578	3.04761	0.979403	0	14.0063	0	22.3173	6.82562	0.105909	0	0
2000	1121	0.136978	0.320759	-1673.97	0.041742	0.165907	cpx	Na0.01Ca0.27Fe''0.43Mg1.21Fe'''0.03Ti0.00Al0.13Si1.92O6	52.6562	0.0443749	3.04548	0.982752	0	14.0751	0	22.2717	6.81817	0.106209	0	0
2000	1120	0.134978	0.315921	-1648.63	0.04112	0.163422	cpx	Na0.01Ca0.27Fe''0.43Mg1.21Fe'''0.03Ti0.00Al0.13Si1.92O6	52.6385	0.0447925	3.04333	0.986107	0	14.1441	0	22.226	6.81059	0.106507	0	0
2000	1119	0.13302	0.311186	-1623.82	0.040511	0.16099	cpx	Na0.01Ca0.27Fe''0.43Mg1.21Fe'''0.03Ti0.00Al0.13Si1.92O6	52.6208	0.0452107	3.04119	0.989467	0	14.2134	0	22.1803	6.80287	0.106803	0	0
2000	1118	0.131103	0.306551	-1599.53	0.039915	0.158609	cpx	Na0.01Ca0.27Fe''0.44Mg1.21Fe'''0.03Ti0.00Al0.13Si1.92O6	52.6031	0.0456294	3.03904	0.992833	0	14.2829	0	22.1344	6.79501	0.107097	0	0
2000	1117	0.129225	0.302014	-1575.76	0.039331	0.156278	cpx	Na0.01Ca0.27Fe''0.44Mg1.20Fe'''0.03Ti0.00Al0.13Si1.92O6	52.5853	0.0460487	3.03689	0.996205	0	14.3526	0	22.0886	6.78703	0.107389	0	0
2000	1116	0.127387	0.297571	-1552.47	0.038759	0.153996	cpx	Na0.01Ca0.27Fe''0.44Mg1.20Fe'''0.03Ti0.00Al0.13Si1.92O6	52.5674	0.0464686	3.03474	0.999584	0	14.4226	0	22.0426	6.77891	0.10768	0	0
2000	1115	0.125586	0.29322	-1529.67	0.038199	0.15176	cpx	Na0.01Ca0.27Fe''0.44Mg1.20Fe'''0.03Ti0.00Al0.13Si1.92O6	52.5495	0.046889	3.03258	1.00297	0	14.4928	0	21.9966	6.77066	0.107968	0	0
2000	1114	0.123821	0.288958	-1507.33	0.037651	0.14957	cpx	Na0.01Ca0.27Fe''0.45Mg1.20Fe'''0.03Ti0.00Al0.13Si1.92O6	52.5315	0.0473099	3.03042	1.00636	0	14.5633	0	21.9505	6.76229	0.108255	0	0
2000	1113	0.122092	0.284783	-1485.45	0.037113	0.147424	cpx	Na0.01Ca0.27Fe''0.45Mg1.20Fe'''0.03Ti0.00Al0.13Si1.92O6	52.5135	0.0477312	3.02826	1.00976	0	14.6341	0	21.9043	6.75378	0.108539	0	0
2000	1112	0.120398	0.280692	-1464	0.036587	0.145322	cpx	Na0.01Ca0.26Fe''0.45Mg1.19Fe'''0.03Ti0.00Al0.13Si1.92O6	52.4955	0.0481531	3.0261	1.01317	0	14.7051	0	21.8581	6.74515	0.108822	0	0
2000	1111	0.118738	0.276684	-1442.99	0.036071	0.143262	cpx	Na0.01Ca0.26Fe''0.45Mg1.19Fe'''0.03Ti0.00Al0.13Si1.92O6	52.4774	0.0485754	3.02394	1.01658	0	14.7763	0	21.8117	6.73639	0.109103	0	0
2000	1110	0.11711	0.272756	-1422.39	0.035565	0.141243	cpx	Na0.01Ca0.26Fe''0.46Mg1.19Fe'''0.03Ti0.00Al0.13Si1.92O6	52.4592	0.0489982	3.02177	1.02001	0	14.8478	0	21.7653	6.7275	0.109381	0	0
2000	1109	0.115514	0.268905	-1402.2	0.035069	0.139263	cpx	Na0.01Ca0.26Fe''0.46Mg1.19Fe'''0.03Ti0.00Al0.13Si1.92O6	52.441	0.0494215	3.0196	1.02344	0	14.9196	0	21.7188	6.7185	0.109658	0	0
2000	1108	0.113949	0.265131	-1382.41	0.034583	0.137323	cpx	Na0.01Ca0.26Fe''0.46Mg1.19Fe'''0.03Ti0.00Al0.13Si1.92O6	52.4227	0.0498451	3.01743	1.02688	0	14.9917	0	21.6722	6.70936	0.109933	0	0
2000	1107	0.112414	0.26143	-1363	0.034106	0.13542	cpx	Na0.01Ca0.26Fe''0.46Mg1.18Fe'''0.03Ti0.00Al0.13Si1.92O6	52.4044	0.0502692	3.01525	1.03033	0	15.064	0	21.6254	6.70011	0.110207	0	0
2000	1106	0.110909	0.257801	-1343.97	0.033639	0.133554	cpx	Na0.01Ca0.26Fe''0.46Mg1.18Fe'''0.03Ti0.00Al0.13Si1.92O6	52.386	0.0506937	3.01308	1.03379	0	15.1366	0	21.5786	6.69073	0.110478	0	0
2000	1105	0.109432	0.254242	-1325.3	0.03318	0.131724	cpx	Na0.01Ca0.26Fe''0.47Mg1.18Fe'''0.03Ti0.00Al0.13Si1.92O6	52.3676	0.0511186	3.0109	1.03726	0	15.2095	0	21.5317	6.68124	0.110747	0	0
2000	1104	0.107984	0.250752	-1306.99	0.03273	0.129929	cpx	Na0.01Ca0.26Fe''0.47Mg1.18Fe'''0.03Ti0.00Al0.13Si1.92O6	52.3491	0.0515439	3.00872	1.04074	0	15.2826	0	21.4847	6.67162	0.111014	0	0
2000	1103	0.106563	0.247328	-1289.02	0.032289	0.128168	cpx	Na0.01Ca0.26Fe''0.47Mg1.17Fe'''0.03Ti0.00Al0.13Si1.92O6	52.3305	0.0519695	3.00654	1.04422	0	15.3561	0	21.4376	6.66189	0.11128	0	0
2000	1102	0.105168	0.243969	-1271.4	0.031856	0.12644	cpx	Na0.01Ca0.26Fe''0.47Mg1.17Fe'''0.03Ti0.00Al0.13Si1.92O6	52.3119	0.0523955	3.00435	1.04772	0	15.4298	0	21.3903	6.65203	0.111543	0	0
2000	1101	0.103799	0.240673	-1254.1	0.031431	0.124744	cpx	Na0.01Ca0.26Fe''0.48Mg1.17Fe'''0.03Ti0.00Al0.13Si1.92O6	52.2932	0.0528219	3.00217	1.05123	0	15.5038	0	21.343	6.64206	0.111804	0	0
2000	1100	0.102456	0.237438	-1237.13	0.031014	0.12308	cpx	Na0.01Ca0.26Fe''0.48Mg1.17Fe'''0.03Ti0.00Al0.13Si1.92O6	52.2744	0.0532486	2.99998	1.05476	0	15.5781	0	21.2955	6.63198	0.112064	0	0
2000	1099	0.101137	0.234264	-1220.46	0.030605	0.121447	cpx	Na0.01Ca0.26Fe''0.48Mg1.17Fe'''0.03Ti0.00Al0.13Si1.92O6	52.2556	0.0536756	2.9978	1.05829	0	15.6527	0	21.2479	6.62178	0.112321	0	0
2000	1098	0.099842	0.231149	-1204.11	0.030203	0.119844	cpx	Na0.01Ca0.26Fe''0.48Mg1.16Fe'''0.03Ti0.00Al0.13Si1.92O6	52.2367	0.0541029	2.99561	1.06183	0	15.7276	0	21.2002	6.61146	0.112577	0	0
2000	1097	0.098571	0.22809	-1188.06	0.029809	0.11827	cpx	Na0.01Ca0.26Fe''0.49Mg1.16Fe'''0.03Ti0.00Al0.13Si1.92O6	52.2177	0.0545305	2.99342	1.06539	0	15.8027	0	21.1523	6.60104	0.112831	0	0
2000	1096	0.097323	0.225088	-1172.29	0.029421	0.116725	cpx	Na0.01Ca0.26Fe''0.49Mg1.16Fe'''0.03Ti0.00Al0.13Si1.92O6	52.1987	0.0549584	2.99123	1.06896	0	15.8782	0	21.1044	6.5905	0.113082	0	0
2000	1095	0.096097	0.22214	-1156.81	0.029041	0.115208	cpx	Na0.01Ca0.26Fe''0.49Mg1.16Fe'''0.03Ti0.00Al0.13Si1.92O6	52.1796	0.0553866	2.98903	1.07254	0	15.954	0	21.0562	6.57985	0.113332	0	0
2000	1094	0.094893	0.219245	-1141.61	0.028667	0.113718	cpx	Na0.01Ca0.26Fe''0.49Mg1.15Fe'''0.03Ti0.00Al0.13Si1.92O6	52.1604	0.0558151	2.98684	1.07613	0	16.0301	0	21.008	6.56909	0.113579	0	0
2000	1093	0.09371	0.216402	-1126.68	0.028301	0.112254	cpx	Na0.01Ca0.26Fe''0.50Mg1.15Fe'''0.03Ti0.00Al0.13Si1.92O6	52.1412	0.0562438	2.98465	1.07974	0	16.1065	0	20.9596	6.55821	0.113825	0	0
2000	1092	0.092548	0.21361	-1112.01	0.02794	0.110817	cpx	Na0.01Ca0.26Fe''0.50Mg1.15Fe'''0.03Ti0.00Al0.13Si1.92O6	52.1219	0.0566727	2.98245	1.08336	0	16.1833	0	20.9111	6.54724	0.114069	0	0
2000	1091	0.091407	0.210867	-1097.61	0.027586	0.109405	cpx	Na0.01Ca0.26Fe''0.50Mg1.15Fe'''0.03Ti0.00Al0.13Si1.92O6	52.1025	0.0571019	2.98025	1.087	0	16.2603	0	20.8624	6.53615	0.11431	0	0
2000	1090	0.090285	0.208173	-1083.45	0.027238	0.108017	cpx	Na0.01Ca0.26Fe''0.50Mg1.15Fe'''0.03Ti0.00Al0.13Si1.92O6	52.083	0.0575313	2.97806	1.09065	0	16.3377	0	20.8136	6.52495	0.11455	0	0
2000	1089	0.089183	0.205526	-1069.54	0.026897	0.106654	cpx	Na0.01Ca0.26Fe''0.51Mg1.14Fe'''0.03Ti0.00Al0.13Si1.92O6	52.0634	0.0579609	2.97586	1.09431	0	16.4154	0	20.7646	6.51365	0.114787	0	0
2000	1088	0.088099	0.202925	-1055.88	0.026561	0.105315	cpx	Na0.01Ca0.26Fe''0.51Mg1.14Fe'''0.03Ti0.00Al0.13Si1.92O6	52.0438	0.0583908	2.97366	1.09799	0	16.4934	0	20.7155	6.50225	0.115023	0	0
2000	1087	0.087035	0.20037	-1042.45	0.026231	0.103999	cpx	Na0.01Ca0.26Fe''0.51Mg1.14Fe'''0.03Ti0.00Al0.13Si1.92O6	52.0241	0.0588208	2.97146	1.10169	0	16.5717	0	20.6662	6.49074	0.115256	0	0
2000	1086	0.085988	0.197858	-1029.25	0.025906	0.102705	cpx	Na0.01Ca0.26Fe''0.51Mg1.14Fe'''0.03Ti0.00Al0.13Si1.92O6	52.0043	0.059251	2.96926	1.1054	0	16.6504	0	20.6168	6.47913	0.115488	0	0
2000	1085	0.084959	0.19539	-1016.27	0.025587	0.101433	cpx	Na0.01Ca0.26Fe''0.52Mg1.13Fe'''0.03Ti0.00Al0.13Si1.92O6	51.9845	0.0596814	2.96706	1.10912	0	16.7294	0	20.5672	6.46741	0.115717	0	0
2000	1084	0.083948	0.192964	-1003.51	0.025274	0.100183	cpx	Na0.01Ca0.26Fe''0.52Mg1.13Fe'''0.03Ti0.00Al0.13Si1.92O6	51.9645	0.0601119	2.96486	1.11287	0	16.8087	0	20.5174	6.45559	0.115945	0	0
2000	1083	0.082953	0.190579	-990.975	0.024966	0.098954	cpx	Na0.01Ca0.26Fe''0.52Mg1.13Fe'''0.03Ti0.00Al0.13Si1.92O6	51.9445	0.0605426	2.96266	1.11663	0	16.8884	0	20.4675	6.44368	0.11617	0	0
2000	1082	0.081975	0.188234	-978.646	0.024663	0.097746	cpx	Na0.01Ca0.26Fe''0.53Mg1.13Fe'''0.03Ti0.00Al0.13Si1.92O6	51.9244	0.0609734	2.96046	1.1204	0	16.9684	0	20.4173	6.43166	0.116393	0	0
2000	1081	0.081013	0.185929	-966.522	0.024365	0.096558	cpx	Na0.01Ca0.25Fe''0.53Mg1.12Fe'''0.03Ti0.00Al0.13Si1.92O6	51.9042	0.0614044	2.95825	1.1242	0	17.0488	0	20.3671	6.41954	0.116615	0	0
2000	1080	0.080068	0.183663	-954.601	0.024072	0.09539	cpx	Na0.01Ca0.25Fe''0.53Mg1.12Fe'''0.03Ti0.00Al0.13Si1.92O6	51.8839	0.0618355	2.95605	1.12801	0	17.1295	0	20.3166	6.40733	0.116834	0	0
2000	1079	0.079137	0.181434	-942.877	0.023784	0.094241	cpx	Na0.01Ca0.25Fe''0.53Mg1.12Fe'''0.03Ti0.00Al0.13Si1.92O6	51.8635	0.0622667	2.95385	1.13184	0	17.2106	0	20.2659	6.39502	0.117051	0	0
2000	1078	0.078222	0.179243	-931.345	0.0235	0.093111	cpx	Na0.01Ca0.25Fe''0.54Mg1.12Fe'''0.03Ti0.00Al0.13Si1.92O6	51.843	0.0626981	2.95165	1.13569	0	17.292	0	20.2151	6.38261	0.117266	0	0
2000	1077	0.077322	0.177087	-920.003	0.023222	0.092	cpx	Na0.01Ca0.25Fe''0.54Mg1.11Fe'''0.03Ti0.00Al0.13Si1.92O6	51.8224	0.0631295	2.94944	1.13956	0	17.3738	0	20.1641	6.3701	0.117478	0	0
2000	1076	0.076437	0.174967	-908.846	0.022947	0.090907	cpx	Na0.01Ca0.25Fe''0.54Mg1.11Fe'''0.03Ti0.00Al0.13Si1.92O6	51.8018	0.063561	2.94724	1.14344	0	17.4559	0	20.1129	6.3575	0.117689	0	0
2000	1075	0.075566	0.172882	-897.869	0.022678	0.089831	cpx	Na0.01Ca0.25Fe''0.54Mg1.11Fe'''0.03Ti0.00Al0.13Si1.92O6	51.781	0.0639926	2.94504	1.14735	0	17.5384	0	20.0615	6.34481	0.117898	0	0
2000	1074	0.074708	0.17083	-887.07	0.022412	0.088773	cpx	Na0.01Ca0.25Fe''0.55Mg1.11Fe'''0.03Ti0.00Al0.13Si1.92O6	51.7602	0.0644243	2.94283	1.15128	0	17.6213	0	20.0099	6.33202	0.118104	0	0
2000	1073	0.073865	0.168812	-876.445	0.022151	0.087732	cpx	Na0.01Ca0.25Fe''0.55Mg1.11Fe'''0.03Ti0.00Al0.13Si1.92O6	51.7392	0.064856	2.94063	1.15522	0	17.7045	0	19.9581	6.31914	0.118309	0	0
2000	1072	0.073035	0.166826	-865.989	0.021894	0.086708	cpx	Na0.01Ca0.25Fe''0.55Mg1.10Fe'''0.03Ti0.00Al0.13Si1.92O6	51.7182	0.0652878	2.93843	1.15919	0	17.7882	0	19.9061	6.30617	0.118511	0	0
2000	1071	0.072218	0.164873	-855.701	0.021641	0.0857	cpx	Na0.01Ca0.25Fe''0.56Mg1.10Fe'''0.03Ti0.00Al0.13Si1.92O6	51.6971	0.0657197	2.93623	1.16318	0	17.8721	0	19.8538	6.29311	0.118711	0	0
2000	1070	0.071414	0.16295	-845.575	0.021392	0.084708	cpx	Na0.01Ca0.25Fe''0.56Mg1.10Fe'''0.03Ti0.00Al0.13Si1.92O6	51.6758	0.0661516	2.93402	1.16719	0	17.9565	0	19.8014	6.27996	0.118909	0	0
2000	1069	0.070622	0.161058	-835.609	0.021147	0.083732	cpx	Na0.01Ca0.25Fe''0.56Mg1.10Fe'''0.03Ti0.00Al0.13Si1.92O6	51.6545	0.0665835	2.93182	1.17123	0	18.0413	0	19.7488	6.26672	0.119105	0	0
2000	1068	0.069843	0.159197	-825.8	0.020906	0.082771	cpx	Na0.01Ca0.25Fe''0.56Mg1.09Fe'''0.03Ti0.00Al0.13Si1.92O6	51.6331	0.0670155	2.92962	1.17528	0	18.1264	0	19.6959	6.25339	0.119298	0	0
2000	1067	0.069076	0.157364	-816.145	0.020669	0.081825	cpx	Na0.01Ca0.25Fe''0.57Mg1.09Fe'''0.03Ti0.00Al0.13Si1.92O6	51.6115	0.0674475	2.92742	1.17936	0	18.2119	0	19.6429	6.23997	0.11949	0	0
2000	1066	0.068321	0.155561	-806.64	0.020435	0.080894	cpx	Na0.01Ca0.25Fe''0.57Mg1.09Fe'''0.03Ti0.00Al0.13Si1.92O6	51.5899	0.0678795	2.92522	1.18347	0	18.2979	0	19.5896	6.22646	0.119679	0	0
2000	1065	0.067578	0.153785	-797.283	0.020205	0.079977	cpx	Na0.01Ca0.25Fe''0.57Mg1.09Fe'''0.03Ti0.00Al0.13Si1.92O6	51.5681	0.0683115	2.92302	1.18759	0	18.3842	0	19.5361	6.21287	0.119866	0	0
2000	1064	0.066846	0.152038	-788.07	0.019979	0.079075	cpx	Na0.01Ca0.25Fe''0.58Mg1.08Fe'''0.03Ti0.00Al0.13Si1.92O6	51.5462	0.0687435	2.92082	1.19174	0	18.4709	0	19.4823	6.1992	0.120051	0	0
2000	1063	0.066126	0.150317	-779	0.019756	0.078187	cpx	Na0.01Ca0.25Fe''0.58Mg1.08Fe'''0.03Ti0.00Al0.13Si1.92O6	51.5243	0.0691756	2.91862	1.19592	0	18.558	0	19.4284	6.18544	0.120234	0	0
2000	1062	0.065416	0.148624	-770.068	0.019537	0.077312	cpx	Na0.01Ca0.25Fe''0.58Mg1.08Fe'''0.03Ti0.00Al0.13Si1.92O6	51.5022	0.0696076	2.91642	1.20012	0	18.6455	0	19.3741	6.1716	0.120414	0	0
2000	1061	0.064717	0.146956	-761.273	0.019321	0.076451	cpx	Na0.01Ca0.25Fe''0.58Mg1.07Fe'''0.03Ti0.00Al0.13Si1.92O6	51.48	0.0700396	2.91422	1.20435	0	18.7334	0	19.3197	6.15767	0.120592	0	0
2000	1060	0.064029	0.145314	-752.611	0.019108	0.075602	cpx	Na0.01Ca0.25Fe''0.59Mg1.07Fe'''0.03Ti0.00Al0.13Si1.92O6	51.4577	0.0704716	2.91202	1.2086	0	18.8218	0	19.265	6.14366	0.120768	0	0
2000	1059	0.063351	0.143697	-744.081	0.018898	0.074767	cpx	Na0.01Ca0.25Fe''0.59Mg1.07Fe'''0.03Ti0.00Al0.13Si1.92O6	51.4353	0.0709035	2.90982	1.21288	0	18.9105	0	19.2101	6.12957	0.120942	0	0
2000	1058	0.062684	0.142105	-735.68	0.018692	0.073944	cpx	Na0.01Ca0.24Fe''0.59Mg1.07Fe'''0.03Ti0.00Al0.13Si1.92O6	51.4128	0.0713355	2.90762	1.21718	0	18.9997	0	19.1549	6.11541	0.121113	0	0
2000	1057	0.062026	0.140537	-727.405	0.018488	0.073134	cpx	Na0.01Ca0.24Fe''0.60Mg1.06Fe'''0.03Ti0.00Al0.13Si1.92O6	51.3901	0.0717673	2.90542	1.22152	0	19.0892	0	19.0995	6.10116	0.121283	0	0
2000	1056	0.061378	0.138993	-719.253	0.018288	0.072336	cpx	Na0.01Ca0.24Fe''0.60Mg1.06Fe'''0.03Ti0.00Al0.13Si1.92O6	51.3674	0.0721992	2.90323	1.22588	0	19.1792	0	19.0438	6.08683	0.12145	0	0
2000	1055	0.06074	0.137472	-711.224	0.018091	0.07155	cpx	Na0.01Ca0.24Fe''0.60Mg1.06Fe'''0.03Ti0.00Al0.13Si1.92O6	51.3445	0.072631	2.90103	1.23027	0	19.2697	0	18.9879	6.07242	0.121614	0	0
2000	1054	0.060111	0.135974	-703.314	0.017896	0.070776	cpx	Na0.01Ca0.24Fe''0.61Mg1.06Fe'''0.03Ti0.00Al0.13Si1.92O6	51.3215	0.0730628	2.89883	1.23469	0	19.3605	0	18.9317	6.05794	0.121777	0	0
2000	1053	0.059492	0.134498	-695.522	0.017705	0.070013	cpx	Na0.01Ca0.24Fe''0.61Mg1.05Fe'''0.03Ti0.00Al0.13Si1.92O6	51.2984	0.0734945	2.89664	1.23914	0	19.4518	0	18.8752	6.04338	0.121937	0	0
2000	1052	0.058882	0.133045	-687.844	0.017516	0.069261	cpx	Na0.01Ca0.24Fe''0.61Mg1.05Fe'''0.04Ti0.00Al0.13Si1.92O6	51.2751	0.0739261	2.89444	1.24361	0	19.5435	0	18.8185	6.02874	0.122095	0	0
2000	1051	0.058281	0.131613	-680.279	0.01733	0.068521	cpx	Na0.01Ca0.24Fe''0.62Mg1.05Fe'''0.04Ti0.00Al0.13Si1.92O6	51.2518	0.0743577	2.89224	1.24812	0	19.6357	0	18.7615	6.01403	0.12225	0	0
2000	1050	0.057688	0.130202	-672.826	0.017147	0.067791	cpx	Na0.01Ca0.24Fe''0.62Mg1.05Fe'''0.04Ti0.00Al0.13Si1.92O6	51.2283	0.0747893	2.89005	1.25266	0	19.7283	0	18.7043	5.99925	0.122403	0	0
2000	1049	0.057104	0.128813	-665.481	0.016967	0.067072	cpx	Na0.01Ca0.24Fe''0.62Mg1.04Fe'''0.04Ti0.00Al0.13Si1.92O6	51.2047	0.0752207	2.88785	1.25723	0	19.8214	0	18.6467	5.98439	0.122554	0	0
[truncated: 2,463 more rows]
[truncated: 1 more columns]
