# Supplementary material for: A 5-km-thick reservoir with > 380,000 km3 of magma within the ancient Earth's crust
Source: Sci Rep. 2022 Sep 19;12:15651. doi: 10.1038/s41598-022-19915-w (PMC9485162; doi:10.1038/s41598-022-19915-w)
Supplement: Supplementary file 18 — Supplementary Information 18. [file 41598_2022_19915_MOESM18_ESM.xlsx]

## Sheet: alphaMELTS_tbl
SupplTable S4B-4 - Fractional crystallization of the mix O40R60
System	Thermodynamic	Data:
Pressure	Temperature	mass	F	phi	S	H	V	dVdP*10^6	dVdT*10^6	Cp	logfO2(absolute)	logfO2-QFM	rhol	rhos	viscosity	aH2O	chisqr
2000	1400	99.9956	1	1	294.74	-1.22563e+06	39.9364	-341.063	3172.11	150.1	-6.318	0	2.50387	0	2.041	0.0680237	0
2000	1400	99.9956	1	1	294.74	-1.22563e+06	39.9364	-341.063	3172.11	150.1	-6.318	0	2.50387	0	2.041	0.0680237	0
2000	1399	99.9957	1	1	294.65	-1.22578e+06	39.9332	-341.014	3171.99	150.099	-6.327	0	2.50407	0	2.045	0.068013	0
2000	1398	99.9957	1	1	294.561	-1.22593e+06	39.9301	-340.966	3171.87	150.099	-6.336	0	2.50427	0	2.049	0.0680023	0
2000	1397	99.9957	1	1	294.471	-1.22608e+06	39.9269	-340.917	3171.75	150.099	-6.345	0	2.50447	0	2.052	0.0679917	0
2000	1396	99.9957	1	1	294.381	-1.22623e+06	39.9238	-340.868	3171.62	150.098	-6.353	0	2.50467	0	2.056	0.067981	0
2000	1395	99.9957	1	1	294.291	-1.22638e+06	39.9206	-340.82	3171.5	150.098	-6.362	0	2.50487	0	2.06	0.0679704	0
2000	1394	99.9957	1	1	294.201	-1.22653e+06	39.9174	-340.771	3171.38	150.098	-6.371	0	2.50506	0	2.064	0.0679598	0
2000	1393	99.9957	1	1	294.111	-1.22668e+06	39.9143	-340.723	3171.26	150.097	-6.38	0	2.50526	0	2.068	0.0679491	0
2000	1392	99.9957	1	1	294.021	-1.22683e+06	39.9111	-340.674	3171.13	150.097	-6.388	0	2.50546	0	2.072	0.0679385	0
2000	1391	99.9958	1	1	293.931	-1.22698e+06	39.908	-340.626	3171.01	150.097	-6.397	0	2.50566	0	2.076	0.0679279	0
2000	1390	99.9958	1	1	293.841	-1.22713e+06	39.9048	-340.577	3170.88	150.097	-6.406	0	2.50586	0	2.08	0.0679173	0
2000	1389	99.9958	1	1	293.75	-1.22728e+06	39.9016	-340.529	3170.76	150.096	-6.415	0	2.50606	0	2.083	0.0679067	0
2000	1388	99.9958	1	1	293.66	-1.22743e+06	39.8985	-340.48	3170.63	150.096	-6.424	0	2.50626	0	2.087	0.0678961	0
2000	1387	99.9958	1	1	293.57	-1.22758e+06	39.8953	-340.432	3170.51	150.096	-6.433	0	2.50645	0	2.091	0.0678855	0
2000	1386	99.9958	1	1	293.479	-1.22773e+06	39.8922	-340.383	3170.38	150.095	-6.442	0	2.50665	0	2.095	0.0678749	0
2000	1385	99.9958	1	1	293.389	-1.22788e+06	39.889	-340.335	3170.25	150.095	-6.45	0	2.50685	0	2.099	0.0678643	0
2000	1384	99.9958	1	1	293.298	-1.22803e+06	39.8858	-340.286	3170.12	150.095	-6.459	0	2.50705	0	2.103	0.0678537	0
2000	1383	99.9959	1	1	293.208	-1.22818e+06	39.8827	-340.238	3170	150.094	-6.468	0	2.50725	0	2.107	0.0678431	0
2000	1382	99.9959	1	1	293.117	-1.22833e+06	39.8795	-340.19	3169.87	150.094	-6.477	0	2.50745	0	2.111	0.0678326	0
2000	1381	99.9959	1	1	293.027	-1.22848e+06	39.8764	-340.141	3169.74	150.094	-6.486	0	2.50765	0	2.115	0.067822	0
2000	1380	99.9959	1	1	292.936	-1.22863e+06	39.8732	-340.093	3169.61	150.093	-6.495	0	2.50785	0	2.119	0.0678115	0
2000	1379	99.9959	1	1	292.845	-1.22878e+06	39.8701	-340.045	3169.48	150.093	-6.504	0	2.50805	0	2.123	0.0678009	0
2000	1378	99.9959	1	1	292.754	-1.22893e+06	39.8669	-339.996	3169.35	150.093	-6.513	0	2.50824	0	2.127	0.0677904	0
2000	1377	99.9959	1	1	292.663	-1.22908e+06	39.8638	-339.948	3169.22	150.092	-6.522	0	2.50844	0	2.131	0.0677799	0
2000	1376	99.996	1	1	292.572	-1.22924e+06	39.8606	-339.9	3169.08	150.092	-6.531	0	2.50864	0	2.134	0.0677694	0
2000	1375	99.996	1	1	292.481	-1.22939e+06	39.8574	-339.851	3168.95	150.092	-6.54	0	2.50884	0	2.138	0.0677588	0
2000	1374	99.996	1	1	292.39	-1.22954e+06	39.8543	-339.803	3168.82	150.092	-6.549	0	2.50904	0	2.142	0.0677483	0
2000	1373	99.996	1	1	292.299	-1.22969e+06	39.8511	-339.755	3168.69	150.091	-6.558	0	2.50924	0	2.146	0.0677378	0
2000	1372	99.996	1	1	292.208	-1.22984e+06	39.848	-339.707	3168.55	150.091	-6.567	0	2.50944	0	2.15	0.0677273	0
2000	1371	99.996	1	1	292.117	-1.22999e+06	39.8448	-339.659	3168.42	150.091	-6.576	0	2.50964	0	2.154	0.0677169	0
2000	1370	99.9961	1	1	292.026	-1.23014e+06	39.8417	-339.61	3168.28	150.09	-6.585	0	2.50984	0	2.158	0.0677064	0
2000	1369	99.9961	1	1	291.934	-1.23029e+06	39.8385	-339.562	3168.15	150.09	-6.594	0	2.51003	0	2.162	0.0676959	0
2000	1368	99.9961	1	1	291.843	-1.23044e+06	39.8354	-339.514	3168.01	150.09	-6.603	0	2.51023	0	2.166	0.0676854	0
2000	1367	99.9961	1	1	291.751	-1.23059e+06	39.8322	-339.466	3167.88	150.089	-6.612	0	2.51043	0	2.17	0.067675	0
2000	1366	99.9961	1	1	291.66	-1.23074e+06	39.8291	-339.418	3167.74	150.089	-6.621	0	2.51063	0	2.174	0.0676645	0
2000	1365	99.9961	1	1	291.568	-1.23089e+06	39.8259	-339.37	3167.6	150.089	-6.63	0	2.51083	0	2.178	0.0676541	0
2000	1364	99.9962	1	1	291.477	-1.23104e+06	39.8227	-339.322	3167.47	150.089	-6.64	0	2.51103	0	2.182	0.0676437	0
2000	1363	99.9962	1	1	291.385	-1.23119e+06	39.8196	-339.274	3167.33	150.088	-6.649	0	2.51123	0	2.186	0.0676332	0
2000	1362	99.9962	1	1	291.293	-1.23134e+06	39.8164	-339.226	3167.19	150.088	-6.658	0	2.51143	0	2.19	0.0676228	0
2000	1361	99.9962	1	1	291.202	-1.23149e+06	39.8133	-339.178	3167.05	150.088	-6.667	0	2.51163	0	2.194	0.0676124	0
2000	1360	99.9962	1	1	291.11	-1.23164e+06	39.8101	-339.13	3166.91	150.087	-6.676	0	2.51183	0	2.198	0.067602	0
2000	1359	99.9962	1	1	291.018	-1.23179e+06	39.807	-339.082	3166.77	150.087	-6.685	0	2.51203	0	2.202	0.0675916	0
2000	1358	99.9963	1	1	290.926	-1.23194e+06	39.8038	-339.034	3166.63	150.087	-6.694	0	2.51223	0	2.207	0.0675812	0
2000	1357	99.9963	1	1	290.834	-1.23209e+06	39.8007	-338.986	3166.49	150.087	-6.704	0	2.51243	0	2.211	0.0675709	0
2000	1356	99.9963	1	1	290.742	-1.23224e+06	39.7975	-338.938	3166.35	150.086	-6.713	0	2.51262	0	2.215	0.0675605	0
2000	1355	99.9963	1	1	290.65	-1.23239e+06	39.7944	-338.89	3166.2	150.086	-6.722	0	2.51282	0	2.219	0.0675501	0
2000	1354	99.9963	1	1	290.558	-1.23254e+06	39.7912	-338.842	3166.06	150.086	-6.731	0	2.51302	0	2.223	0.0675398	0
2000	1353	99.9964	1	1	290.465	-1.23269e+06	39.7881	-338.794	3165.92	150.085	-6.741	0	2.51322	0	2.227	0.0675294	0
2000	1352	99.9964	1	1	290.373	-1.23284e+06	39.7849	-338.746	3165.77	150.085	-6.75	0	2.51342	0	2.231	0.0675191	0
2000	1351	99.9964	1	1	290.281	-1.23299e+06	39.7818	-338.698	3165.63	150.085	-6.759	0	2.51362	0	2.235	0.0675088	0
2000	1350	99.9964	1	1	290.188	-1.23314e+06	39.7786	-338.65	3165.49	150.085	-6.768	0	2.51382	0	2.239	0.0674985	0
2000	1349	99.9964	1	1	290.096	-1.23329e+06	39.7755	-338.603	3165.34	150.084	-6.778	0	2.51402	0	2.243	0.0674881	0
2000	1348	99.9964	1	1	290.003	-1.23344e+06	39.7723	-338.555	3165.19	150.084	-6.787	0	2.51422	0	2.247	0.0674778	0
2000	1347	99.9965	1	1	289.911	-1.23359e+06	39.7692	-338.507	3165.05	150.084	-6.796	0	2.51442	0	2.251	0.0674676	0
2000	1346	99.9965	1	1	289.818	-1.23375e+06	39.766	-338.459	3164.9	150.083	-6.806	0	2.51462	0	2.255	0.0674573	0
2000	1345	99.9965	1	1	289.726	-1.2339e+06	39.7629	-338.412	3164.75	150.083	-6.815	0	2.51482	0	2.26	0.067447	0
2000	1344	99.9965	1	1	289.633	-1.23405e+06	39.7598	-338.364	3164.61	150.083	-6.824	0	2.51502	0	2.264	0.0674367	0
2000	1343	99.9965	1	1	289.54	-1.2342e+06	39.7566	-338.316	3164.46	150.083	-6.834	0	2.51522	0	2.268	0.0674265	0
2000	1342	99.9966	1	1	289.447	-1.23435e+06	39.7535	-338.268	3164.31	150.082	-6.843	0	2.51542	0	2.272	0.0674162	0
2000	1341	99.9966	1	1	289.354	-1.2345e+06	39.7503	-338.221	3164.16	150.082	-6.852	0	2.51562	0	2.276	0.067406	0
2000	1340	99.9966	1	1	289.261	-1.23465e+06	39.7472	-338.173	3164.01	150.082	-6.862	0	2.51582	0	2.28	0.0673958	0
2000	1339	99.9966	1	1	289.168	-1.2348e+06	39.744	-338.125	3163.86	150.081	-6.871	0	2.51602	0	2.284	0.0673855	0
2000	1338	99.9966	1	1	289.075	-1.23495e+06	39.7409	-338.078	3163.71	150.081	-6.88	0	2.51622	0	2.288	0.0673753	0
2000	1337	99.9967	1	1	288.982	-1.2351e+06	39.7377	-338.03	3163.56	150.081	-6.89	0	2.51642	0	2.293	0.0673651	0
2000	1336	99.9967	1	1	288.889	-1.23525e+06	39.7346	-337.983	3163.41	150.081	-6.899	0	2.51662	0	2.297	0.0673549	0
2000	1335	99.9967	1	1	288.796	-1.2354e+06	39.7314	-337.935	3163.26	150.08	-6.909	0	2.51682	0	2.301	0.0673448	0
2000	1334	99.9967	1	1	288.702	-1.23555e+06	39.7283	-337.888	3163.1	150.08	-6.918	0	2.51701	0	2.305	0.0673346	0
2000	1333	99.9967	1	1	288.609	-1.2357e+06	39.7251	-337.84	3162.95	150.08	-6.928	0	2.51722	0	2.309	0.0673244	0
2000	1332	99.9968	1	1	288.516	-1.23585e+06	39.722	-337.792	3162.8	150.08	-6.937	0	2.51742	0	2.313	0.0673143	0
2000	1331	99.9968	1	1	288.422	-1.236e+06	39.7189	-337.745	3162.64	150.079	-6.947	0	2.51762	0	2.318	0.0673041	0
2000	1330	99.9968	1	1	288.328	-1.23615e+06	39.7157	-337.698	3162.49	150.079	-6.956	0	2.51781	0	2.322	0.067294	0
2000	1329	99.9968	1	1	288.235	-1.2363e+06	39.7126	-337.65	3162.33	150.079	-6.966	0	2.51801	0	2.326	0.0672839	0
2000	1328	99.9969	1	1	288.141	-1.23645e+06	39.7094	-337.603	3162.18	150.079	-6.975	0	2.51821	0	2.33	0.0672738	0
2000	1327	99.9969	1	1	288.048	-1.2366e+06	39.7063	-337.555	3162.02	150.078	-6.985	0	2.51841	0	2.334	0.0672637	0
2000	1326	99.9969	1	1	287.954	-1.23675e+06	39.7031	-337.508	3161.87	150.078	-6.994	0	2.51861	0	2.339	0.0672536	0
2000	1325	99.9969	1	1	287.86	-1.2369e+06	39.7	-337.46	3161.71	150.078	-7.004	0	2.51881	0	2.343	0.0672435	0
2000	1324	99.9969	1	1	287.766	-1.23705e+06	39.6969	-337.413	3161.55	150.077	-7.013	0	2.51901	0	2.347	0.0672334	0
2000	1323	99.997	1	1	287.672	-1.2372e+06	39.6937	-337.366	3161.39	150.077	-7.023	0	2.51921	0	2.351	0.0672234	0
2000	1322	99.997	1	1	287.578	-1.23735e+06	39.6906	-337.318	3161.23	150.077	-7.033	0	2.51941	0	2.356	0.0672133	0
2000	1321	99.997	1	1	287.484	-1.2375e+06	39.6874	-337.271	3161.08	150.077	-7.042	0	2.51961	0	2.36	0.0672033	0
2000	1320	99.997	1	1	287.39	-1.23765e+06	39.6843	-337.224	3160.92	150.076	-7.052	0	2.51981	0	2.364	0.0671933	0
2000	1319	99.9971	1	1	287.296	-1.23781e+06	39.6812	-337.177	3160.76	150.076	-7.062	0	2.52001	0	2.368	0.0671833	0
2000	1318	99.9971	1	1	287.202	-1.23796e+06	39.678	-337.129	3160.6	150.076	-7.071	0	2.52021	0	2.372	0.0671732	0
2000	1317	99.9971	1	1	287.107	-1.23811e+06	39.6749	-337.082	3160.43	150.076	-7.081	0	2.52041	0	2.377	0.0671633	0
2000	1316	99.9971	1	1	287.013	-1.23826e+06	39.6717	-337.035	3160.27	150.075	-7.09	0	2.52061	0	2.381	0.0671533	0
2000	1315	99.9972	1	1	286.918	-1.23841e+06	39.6686	-336.988	3160.11	150.075	-7.1	0	2.52081	0	2.385	0.0671433	0
2000	1314	99.9972	1	1	286.824	-1.23856e+06	39.6655	-336.94	3159.95	150.075	-7.11	0	2.52101	0	2.39	0.0671333	0
2000	1313	99.9972	1	1	286.729	-1.23871e+06	39.6623	-336.893	3159.79	150.075	-7.12	0	2.52121	0	2.394	0.0671234	0
2000	1312	99.9972	1	1	286.635	-1.23886e+06	39.6592	-336.846	3159.62	150.074	-7.129	0	2.52141	0	2.398	0.0671135	0
2000	1311	99.9972	1	1	286.54	-1.23901e+06	39.656	-336.799	3159.46	150.074	-7.139	0	2.52161	0	2.402	0.0671035	0
2000	1310	99.9973	1	1	286.445	-1.23916e+06	39.6529	-336.752	3159.29	150.074	-7.149	0	2.52181	0	2.407	0.0670936	0
2000	1309	99.9973	1	1	286.351	-1.23931e+06	39.6498	-336.705	3159.13	150.074	-7.159	0	2.52201	0	2.411	0.0670837	0
2000	1308	99.9973	1	1	286.256	-1.23946e+06	39.6466	-336.658	3158.96	150.073	-7.168	0	2.52222	0	2.415	0.0670738	0
2000	1307	99.9973	1	1	286.161	-1.23961e+06	39.6435	-336.611	3158.8	150.073	-7.178	0	2.52242	0	2.42	0.0670639	0
2000	1306	99.9974	1	1	286.066	-1.23976e+06	39.6404	-336.564	3158.63	150.073	-7.188	0	2.52262	0	2.424	0.0670541	0
2000	1305	99.9974	1	1	285.971	-1.23991e+06	39.6372	-336.517	3158.47	150.073	-7.198	0	2.52282	0	2.428	0.0670442	0
2000	1304	99.9974	1	1	285.876	-1.24006e+06	39.6341	-336.47	3158.3	150.072	-7.208	0	2.52302	0	2.433	0.0670344	0
2000	1303	99.9975	1	1	285.781	-1.24021e+06	39.631	-336.423	3158.13	150.072	-7.217	0	2.52322	0	2.437	0.0670245	0
2000	1302	99.9975	1	1	285.686	-1.24036e+06	39.6278	-336.376	3157.96	150.072	-7.227	0	2.52342	0	2.441	0.0670147	0
2000	1301	99.9975	1	1	285.59	-1.24051e+06	39.6247	-336.329	3157.79	150.072	-7.237	0	2.52362	0	2.446	0.0670049	0
2000	1300	99.9975	1	1	285.495	-1.24066e+06	39.6215	-336.282	3157.62	150.072	-7.247	0	2.52382	0	2.45	0.0669951	0
2000	1299	99.9976	1	1	285.4	-1.24081e+06	39.6184	-336.235	3157.45	150.071	-7.257	0	2.52402	0	2.454	0.0669853	0
2000	1298	99.9976	1	1	285.304	-1.24096e+06	39.6153	-336.188	3157.28	150.071	-7.267	0	2.52422	0	2.459	0.0669756	0
2000	1297	99.9976	1	1	285.209	-1.24111e+06	39.6121	-336.141	3157.11	150.071	-7.277	0	2.52442	0	2.463	0.0669658	0
2000	1296	99.9976	1	1	285.113	-1.24127e+06	39.609	-336.094	3156.94	150.071	-7.287	0	2.52462	0	2.467	0.0669561	0
2000	1295	99.9977	1	1	285.018	-1.24142e+06	39.6059	-336.048	3156.77	150.07	-7.296	0	2.52482	0	2.472	0.0669463	0
2000	1294	99.9977	1	1	284.922	-1.24157e+06	39.6027	-336.001	3156.6	150.07	-7.306	0	2.52502	0	2.476	0.0669366	0
2000	1293	99.9977	1	1	284.826	-1.24172e+06	39.5996	-335.954	3156.43	150.07	-7.316	0	2.52522	0	2.48	0.0669269	0
2000	1292	99.9977	1	1	284.73	-1.24187e+06	39.5965	-335.907	3156.25	150.07	-7.326	0	2.52542	0	2.485	0.0669172	0
2000	1291	99.9978	1	1	284.635	-1.24202e+06	39.5934	-335.86	3156.08	150.069	-7.336	0	2.52562	0	2.489	0.0669075	0
2000	1290	99.9978	1	1	284.539	-1.24217e+06	39.5902	-335.814	3155.9	150.069	-7.346	0	2.52582	0	2.494	0.0668979	0
2000	1289	99.9978	1	1	284.443	-1.24232e+06	39.5871	-335.767	3155.73	150.069	-7.356	0	2.52602	0	2.498	0.0668882	0
2000	1288	99.9979	1	1	284.347	-1.24247e+06	39.584	-335.72	3155.55	150.069	-7.366	0	2.52622	0	2.503	0.0668786	0
2000	1287	99.9979	1	1	284.251	-1.24262e+06	39.5808	-335.674	3155.38	150.069	-7.376	0	2.52642	0	2.507	0.0668689	0
2000	1286	99.9979	1	1	284.154	-1.24277e+06	39.5777	-335.627	3155.2	150.068	-7.386	0	2.52662	0	2.511	0.0668593	0
2000	1285	99.9979	1	1	284.058	-1.24292e+06	39.5746	-335.58	3155.03	150.068	-7.396	0	2.52682	0	2.516	0.0668497	0
2000	1284	99.998	1	1	283.962	-1.24307e+06	39.5714	-335.534	3154.85	150.068	-7.407	0	2.52702	0	2.52	0.0668401	0
2000	1283	99.998	1	1	283.866	-1.24322e+06	39.5683	-335.487	3154.67	150.068	-7.417	0	2.52723	0	2.525	0.0668306	0
2000	1282	99.998	1	1	283.769	-1.24337e+06	39.5652	-335.441	3154.49	150.067	-7.427	0	2.52743	0	2.529	0.066821	0
2000	1281	99.9981	1	1	283.673	-1.24352e+06	39.562	-335.394	3154.31	150.067	-7.437	0	2.52763	0	2.534	0.0668115	0
2000	1280	99.9981	1	1	283.576	-1.24367e+06	39.5589	-335.347	3154.14	150.067	-7.447	0	2.52783	0	2.538	0.0668019	0
2000	1279	99.9981	1	1	283.48	-1.24382e+06	39.5558	-335.301	3153.96	150.067	-7.457	0	2.52803	0	2.543	0.0667924	0
2000	1278	99.9981	1	1	283.383	-1.24397e+06	39.5527	-335.254	3153.78	150.067	-7.467	0	2.52823	0	2.547	0.0667829	0
2000	1277	99.9982	1	1	283.286	-1.24412e+06	39.5495	-335.208	3153.6	150.066	-7.477	0	2.52843	0	2.551	0.0667734	0
2000	1276	99.9982	1	1	283.189	-1.24427e+06	39.5464	-335.162	3153.41	150.066	-7.488	0	2.52863	0	2.556	0.066764	0
2000	1275	99.9982	1	1	283.093	-1.24443e+06	39.5433	-335.115	3153.23	150.066	-7.498	0	2.52883	0	2.56	0.0667545	0
2000	1274	99.9983	1	1	282.996	-1.24458e+06	39.5402	-335.069	3153.05	150.066	-7.508	0	2.52903	0	2.565	0.0667451	0
2000	1273	99.9983	1	1	282.899	-1.24473e+06	39.537	-335.022	3152.87	150.065	-7.518	0	2.52923	0	2.569	0.0667356	0
2000	1272	99.9983	1	1	282.802	-1.24488e+06	39.5339	-334.976	3152.69	150.065	-7.528	0	2.52943	0	2.574	0.0667262	0
2000	1271	99.9984	1	1	282.705	-1.24503e+06	39.5308	-334.93	3152.5	150.065	-7.539	0	2.52963	0	2.578	0.0667168	0
2000	1270	99.9984	1	1	282.607	-1.24518e+06	39.5277	-334.883	3152.32	150.065	-7.549	0	2.52983	0	2.583	0.0667074	0
2000	1269	99.9984	1	1	282.51	-1.24533e+06	39.5245	-334.837	3152.13	150.065	-7.559	0	2.53003	0	2.587	0.0666981	0
2000	1268	99.9985	1	1	282.413	-1.24548e+06	39.5214	-334.791	3151.95	150.064	-7.57	0	2.53023	0	2.592	0.0666887	0
2000	1267	99.9985	1	1	282.316	-1.24563e+06	39.5183	-334.744	3151.76	150.064	-7.58	0	2.53044	0	2.597	0.0666794	0
2000	1266	99.9985	1	1	282.218	-1.24578e+06	39.5152	-334.698	3151.58	150.064	-7.59	0	2.53064	0	2.601	0.0666701	0
2000	1265	99.9986	1	1	282.121	-1.24593e+06	39.512	-334.652	3151.39	150.064	-7.6	0	2.53084	0	2.606	0.0666608	0
2000	1264	99.9986	1	1	282.023	-1.24608e+06	39.5089	-334.606	3151.2	150.064	-7.611	0	2.53104	0	2.61	0.0666515	0
2000	1263	99.9986	1	1	281.926	-1.24623e+06	39.5058	-334.559	3151.02	150.063	-7.621	0	2.53124	0	2.615	0.0666422	0
2000	1262	99.9987	1	1	281.828	-1.24638e+06	39.5027	-334.513	3150.83	150.063	-7.632	0	2.53144	0	2.619	0.0666329	0
2000	1261	99.9987	1	1	281.73	-1.24653e+06	39.4995	-334.467	3150.64	150.063	-7.642	0	2.53164	0	2.624	0.0666237	0
2000	1260	99.9987	1	1	281.633	-1.24668e+06	39.4964	-334.421	3150.45	150.063	-7.652	0	2.53184	0	2.628	0.0666145	0
2000	1259	99.9988	1	1	281.535	-1.24683e+06	39.4933	-334.375	3150.26	150.063	-7.663	0	2.53204	0	2.633	0.0666052	0
2000	1258	99.9988	1	1	281.437	-1.24698e+06	39.4902	-334.329	3150.07	150.062	-7.673	0	2.53224	0	2.638	0.0665961	0
2000	1257	99.9988	1	1	281.339	-1.24713e+06	39.4871	-334.283	3149.88	150.062	-7.684	0	2.53245	0	2.642	0.0665869	0
2000	1256	99.9989	1	1	281.241	-1.24729e+06	39.4839	-334.236	3149.69	150.062	-7.694	0	2.53265	0	2.647	0.0665777	0
2000	1255	99.9989	1	1	281.143	-1.24744e+06	39.4808	-334.19	3149.5	150.062	-7.704	0	2.53285	0	2.651	0.0665686	0
2000	1254	99.9989	1	1	281.045	-1.24759e+06	39.4777	-334.144	3149.31	150.062	-7.715	0	2.53305	0	2.656	0.0665594	0
2000	1253	99.999	1	1	280.946	-1.24774e+06	39.4746	-334.098	3149.12	150.061	-7.725	0	2.53325	0	2.661	0.0665503	0
2000	1252	99.999	1	1	280.848	-1.24789e+06	39.4715	-334.052	3148.93	150.061	-7.736	0	2.53345	0	2.665	0.0665412	0
2000	1251	99.999	1	1	280.75	-1.24804e+06	39.4683	-334.006	3148.73	150.061	-7.746	0	2.53365	0	2.67	0.0665321	0
2000	1250	99.9991	1	1	280.651	-1.24819e+06	39.4652	-333.961	3148.54	150.061	-7.757	0	2.53385	0	2.675	0.0665231	0
2000	1249	99.9991	1	1	280.553	-1.24834e+06	39.4621	-333.915	3148.34	150.061	-7.767	0	2.53405	0	2.679	0.066514	0
2000	1248	99.9991	1	1	280.454	-1.24849e+06	39.459	-333.869	3148.15	150.061	-7.778	0	2.53425	0	2.684	0.066505	0
2000	1247	99.9992	1	1	280.356	-1.24864e+06	39.4559	-333.823	3147.96	150.06	-7.789	0	2.53446	0	2.689	0.066496	0
2000	1246	99.9992	1	1	280.257	-1.24879e+06	39.4528	-333.777	3147.76	150.06	-7.799	0	2.53466	0	2.693	0.066487	0
2000	1245	99.9992	1	1	280.158	-1.24894e+06	39.4496	-333.731	3147.56	150.06	-7.81	0	2.53486	0	2.698	0.066478	0
2000	1244	99.9993	1	1	280.059	-1.24909e+06	39.4465	-333.685	3147.37	150.06	-7.82	0	2.53506	0	2.703	0.0664691	0
2000	1243	99.9993	1	1	279.96	-1.24924e+06	39.4434	-333.64	3147.17	150.06	-7.831	0	2.53526	0	2.707	0.0664601	0
2000	1242	99.9993	1	1	279.862	-1.24939e+06	39.4403	-333.594	3146.97	150.059	-7.842	0	2.53546	0	2.712	0.0664512	0
2000	1241	99.9994	1	1	279.763	-1.24954e+06	39.4372	-333.548	3146.78	150.059	-7.852	0	2.53566	0	2.717	0.0664423	0
2000	1240	99.9994	1	1	279.663	-1.24969e+06	39.4341	-333.502	3146.58	150.059	-7.863	0	2.53586	0	2.721	0.0664334	0
2000	1239	99.9995	1	1	279.564	-1.24985e+06	39.4309	-333.457	3146.38	150.059	-7.874	0	2.53607	0	2.726	0.0664246	0
2000	1238	99.9995	1	1	279.465	-1.25e+06	39.4278	-333.411	3146.18	150.059	-7.884	0	2.53627	0	2.731	0.0664157	0
2000	1237	99.9995	1	1	279.366	-1.25015e+06	39.4247	-333.365	3145.98	150.059	-7.895	0	2.53647	0	2.735	0.0664069	0
2000	1236	99.9996	1	1	279.267	-1.2503e+06	39.4216	-333.32	3145.78	150.058	-7.906	0	2.53667	0	2.74	0.0663981	0
2000	1235	99.9996	1	1	279.167	-1.25045e+06	39.4185	-333.274	3145.58	150.058	-7.917	0	2.53687	0	2.745	0.0663893	0
2000	1234	99.9996	1	1	279.068	-1.2506e+06	39.4154	-333.228	3145.38	150.058	-7.927	0	2.53707	0	2.75	0.0663805	0
2000	1233	99.9997	1	1	278.968	-1.25075e+06	39.4123	-333.183	3145.17	150.058	-7.938	0	2.53727	0	2.754	0.0663717	0
2000	1232	99.9997	1	1	278.869	-1.2509e+06	39.4092	-333.137	3144.97	150.058	-7.949	0	2.53748	0	2.759	0.066363	0
2000	1231	99.9998	1	1	278.769	-1.25105e+06	39.406	-333.092	3144.77	150.058	-7.96	0	2.53768	0	2.764	0.0663543	0
2000	1230	99.9998	1	1	278.669	-1.2512e+06	39.4029	-333.046	3144.57	150.057	-7.97	0	2.53788	0	2.769	0.0663456	0
2000	1229	99.9998	1	1	278.569	-1.25135e+06	39.3998	-333.001	3144.36	150.057	-7.981	0	2.53808	0	2.773	0.0663369	0
2000	1228	99.9999	1	1	278.47	-1.2515e+06	39.3967	-332.955	3144.16	150.057	-7.992	0	2.53828	0	2.778	0.0663283	0
2000	1227	99.9999	1	1	278.37	-1.25165e+06	39.3936	-332.91	3143.95	150.057	-8.003	0	2.53848	0	2.783	0.0663196	0
2000	1226	100	1	1	278.27	-1.2518e+06	39.3905	-332.864	3143.75	150.057	-8.014	0	2.53868	0	2.788	0.066311	0
2000	1225	100	1	1	278.17	-1.25195e+06	39.3874	-332.819	3143.54	150.057	-8.025	0	2.53888	0	2.793	0.0663024	0
2000	1224	100	1	1	278.07	-1.2521e+06	39.3843	-332.773	3143.34	150.056	-8.036	0	2.53909	0	2.797	0.0662938	0
2000	1223	100	1	1	277.969	-1.25226e+06	39.3812	-332.728	3143.13	150.056	-8.047	0	2.53929	0	2.802	0.0662853	0
2000	1222	100	1	1	277.869	-1.25241e+06	39.3781	-332.683	3142.92	150.056	-8.057	0	2.53949	0	2.807	0.0662767	0
2000	1221	100	1	1	277.769	-1.25256e+06	39.3749	-332.637	3142.72	150.056	-8.068	0	2.53969	0	2.812	0.0662682	0
2000	1220	100	1	1	277.668	-1.25271e+06	39.3718	-332.592	3142.51	150.056	-8.079	0	2.53989	0	2.817	0.0662597	0
2000	1219	100	1	1	277.568	-1.25286e+06	39.3687	-332.547	3142.3	150.056	-8.09	0	2.54009	0	2.821	0.0662512	0
2000	1218	100	1	1	277.467	-1.25301e+06	39.3656	-332.501	3142.09	150.056	-8.101	0	2.54029	0	2.826	0.0662428	0
2000	1217	100	1	1	277.367	-1.25316e+06	39.3625	-332.456	3141.88	150.055	-8.112	0	2.5405	0	2.831	0.0662343	0
2000	1216	100	1	1	277.266	-1.25331e+06	39.3594	-332.411	3141.67	150.055	-8.123	0	2.5407	0	2.836	0.0662259	0
2000	1215	100	1	1	277.165	-1.25346e+06	39.3563	-332.366	3141.46	150.055	-8.134	0	2.5409	0	2.841	0.0662175	0
2000	1214	100	1	1	277.065	-1.25361e+06	39.3532	-332.321	3141.25	150.055	-8.145	0	2.5411	0	2.846	0.0662091	0
2000	1213	100	1	1	276.964	-1.25376e+06	39.3501	-332.275	3141.04	150.055	-8.156	0	2.5413	0	2.851	0.0662008	0
2000	1212	100.001	1	1	276.863	-1.25391e+06	39.347	-332.23	3140.83	150.055	-8.168	0	2.5415	0	2.855	0.0661924	0
2000	1211	100.001	1	1	276.762	-1.25406e+06	39.3439	-332.185	3140.62	150.054	-8.179	0	2.54171	0	2.86	0.0661841	0
2000	1210	100.001	1	1	276.661	-1.25421e+06	39.3408	-332.14	3140.4	150.054	-8.19	0	2.54191	0	2.865	0.0661759	0
2000	1209	100.001	1	1	276.56	-1.25436e+06	39.3377	-332.095	3140.19	150.054	-8.201	0	2.54211	0	2.87	0.0661676	0
2000	1208	100.001	1	1	276.459	-1.25452e+06	39.3346	-332.05	3139.98	150.054	-8.212	0	2.54231	0	2.875	0.0661593	0
2000	1207	100.001	1	1	276.357	-1.25467e+06	39.3315	-332.005	3139.76	150.054	-8.223	0	2.54251	0	2.88	0.0661511	0
2000	1206	100.001	1	1	276.259	-1.25481e+06	39.3284	-331.96	3139.55	145.406	-8.234	0	2.54271	0	2.885	0.0661429	0
2000	1205	100.001	1	1	276.16	-1.25496e+06	39.3253	-331.915	3139.33	145.405	-8.245	0	2.54292	0	2.89	0.0661347	0
2000	1204	100.001	1	1	276.062	-1.2551e+06	39.3222	-331.87	3139.12	145.404	-8.257	0	2.54312	0	2.895	0.0661266	0
2000	1203	100.001	1	1	275.964	-1.25525e+06	39.3191	-331.825	3138.9	145.402	-8.268	0	2.54332	0	2.9	0.0661184	0
2000	1202	100.001	1	1	275.865	-1.2554e+06	39.316	-331.78	3138.69	145.401	-8.279	0	2.54352	0	2.905	0.0661103	0
2000	1201	100.001	1	1	275.767	-1.25554e+06	39.3129	-331.735	3138.47	145.4	-8.29	0	2.54372	0	2.91	0.0661023	0
2000	1200	100.001	1	1	275.668	-1.25569e+06	39.3098	-331.69	3138.25	145.399	-8.302	0	2.54392	0	2.915	0.0660942	0
2000	1199	100.001	1	1	275.569	-1.25584e+06	39.3067	-331.646	3138.03	145.397	-8.313	0	2.54413	0	2.919	0.0660861	0
2000	1198	100.001	1	1	275.471	-1.25598e+06	39.3036	-331.601	3137.81	145.396	-8.324	0	2.54433	0	2.924	0.0660781	0
2000	1197	100.001	1	1	275.372	-1.25613e+06	39.3005	-331.556	3137.6	145.395	-8.335	0	2.54453	0	2.929	0.0660701	0
2000	1196	100.001	1	1	275.273	-1.25627e+06	39.2974	-331.511	3137.38	145.394	-8.347	0	2.54473	0	2.934	0.0660622	0
2000	1195	100.001	1	1	275.174	-1.25642e+06	39.2943	-331.466	3137.16	145.392	-8.358	0	2.54493	0	2.939	0.0660542	0
2000	1194	100.001	1	1	275.075	-1.25657e+06	39.2912	-331.422	3136.94	145.391	-8.369	0	2.54514	0	2.944	0.0660463	0
2000	1193	100.001	1	1	274.976	-1.25671e+06	39.2881	-331.377	3136.72	145.39	-8.381	0	2.54534	0	2.949	0.0660384	0
2000	1192	100.001	1	1	274.877	-1.25686e+06	39.285	-331.332	3136.49	145.388	-8.392	0	2.54554	0	2.954	0.0660305	0
2000	1191	100.001	1	1	274.778	-1.257e+06	39.2819	-331.288	3136.27	145.387	-8.404	0	2.54574	0	2.959	0.0660227	0
2000	1190	100.002	1	1	274.679	-1.25715e+06	39.2788	-331.243	3136.05	145.386	-8.415	0	2.54594	0	2.964	0.0660148	0
2000	1189	100.002	1	1	274.579	-1.2573e+06	39.2757	-331.198	3135.83	145.385	-8.426	0	2.54614	0	2.97	0.066007	0
2000	1188	100.002	1	1	274.48	-1.25744e+06	39.2726	-331.154	3135.6	145.383	-8.438	0	2.54635	0	2.975	0.0659993	0
2000	1187	100.002	1	1	274.38	-1.25759e+06	39.2695	-331.109	3135.38	145.382	-8.449	0	2.54655	0	2.98	0.0659915	0
2000	1186	100.002	1	1	274.281	-1.25773e+06	39.2664	-331.065	3135.16	145.381	-8.461	0	2.54675	0	2.985	0.0659838	0
2000	1185	100.002	1	1	274.181	-1.25788e+06	39.2633	-331.02	3134.93	145.379	-8.472	0	2.54695	0	2.99	0.0659761	0
2000	1184	100.002	1	1	274.082	-1.25803e+06	39.2602	-330.976	3134.71	145.378	-8.484	0	2.54715	0	2.995	0.0659684	0
2000	1183	100.002	1	1	273.982	-1.25817e+06	39.2571	-330.931	3134.48	145.376	-8.495	0	2.54736	0	3	0.0659607	0
2000	1182	100.002	0.997774	0.998239	273.827	-1.2584e+06	39.2432	-330.593	3131.48	145.299	-8.507	0	2.54707	3.22129	3.009	0.0660985	0
2000	1181	99.7801	0.998696	0.998969	273.159	-1.25576e+06	39.1651	-330.324	3126.73	144.972	-8.518	0	2.54698	3.22184	3.017	0.0661753	0
2000	1180	99.6509	0.998699	0.998972	272.715	-1.2543e+06	39.1157	-330.079	3123.2	144.763	-8.53	0	2.5469	3.2224	3.025	0.0662519	0
2000	1179	99.5222	0.998702	0.998974	272.273	-1.25285e+06	39.0665	-329.834	3119.68	144.555	-8.542	0	2.54682	3.22296	3.033	0.0663282	0
2000	1178	99.3938	0.988315	0.98945	271.599	-1.25174e+06	38.994	-327.786	3103.36	144.083	-8.553	0	2.54603	2.8231	3.038	0.0676341	0
2000	1177	98.234	0.989167	0.990232	268.438	-1.23667e+06	38.5529	-325.428	3077.96	142.357	-8.565	0	2.54529	2.82588	3.044	0.0688589	0
2000	1176	97.1716	0.989285	0.990341	265.52	-1.2229e+06	38.1472	-323.152	3053.82	140.759	-8.576	0	2.54456	2.82586	3.05	0.07009	0
2000	1175	96.1321	0.9894	0.990447	262.666	-1.20943e+06	37.7503	-320.921	3030.2	139.196	-8.588	0	2.54383	2.82584	3.055	0.0713272	0
2000	1174	95.1148	0.989512	0.990552	259.872	-1.19625e+06	37.3618	-318.735	3007.07	137.666	-8.6	0	2.5431	2.82582	3.061	0.0725706	0
2000	1173	94.119	0.989623	0.990654	257.137	-1.18335e+06	36.9815	-316.591	2984.44	136.169	-8.611	0	2.54238	2.8258	3.067	0.0738199	0
2000	1172	93.144	0.989731	0.990754	254.459	-1.17073e+06	36.6091	-314.489	2962.27	134.704	-8.623	0	2.54166	2.82579	3.072	0.0750751	0
2000	1171	92.1892	0.989837	0.990852	251.837	-1.15837e+06	36.2443	-312.428	2940.55	133.269	-8.635	0	2.54094	2.82577	3.078	0.0763361	0
2000	1170	91.254	0.989941	0.990948	249.268	-1.14626e+06	35.887	-310.406	2919.28	131.864	-8.646	0	2.54023	2.82576	3.083	0.0776027	0
2000	1169	90.3378	0.9886	0.990054	246.702	-1.13447e+06	35.5272	-308.368	2897.15	130.426	-8.658	0	2.53905	2.91431	3.092	0.0789828	0
2000	1168	89.3107	0.989194	0.990487	243.919	-1.12132e+06	35.1431	-306.378	2873.8	128.897	-8.67	0	2.53803	2.88691	3.1	0.0803326	0
2000	1167	88.3484	0.989321	0.990602	241.29	-1.10897e+06	34.7787	-304.432	2851.65	127.448	-8.682	0	2.53701	2.88636	3.108	0.0816871	0
2000	1166	87.4077	0.989446	0.990713	238.72	-1.0969e+06	34.4225	-302.526	2829.99	126.032	-8.694	0	2.53601	2.88582	3.116	0.083046	0
2000	1165	86.488	0.989568	0.990823	236.206	-1.0851e+06	34.0742	-300.659	2808.82	124.648	-8.705	0	2.53501	2.88527	3.123	0.0844094	0
2000	1164	85.5885	0.989687	0.990929	233.748	-1.07356e+06	33.7335	-298.828	2788.1	123.294	-8.717	0	2.53402	2.88472	3.131	0.0857772	0
2000	1163	84.7085	0.989803	0.991033	231.342	-1.06228e+06	33.4001	-297.034	2767.84	121.97	-8.729	0	2.53303	2.88416	3.139	0.0871492	0
2000	1162	83.8475	0.989917	0.991135	228.988	-1.05124e+06	33.0738	-295.274	2748.01	120.676	-8.741	0	2.53205	2.8836	3.146	0.0885255	0
2000	1161	83.0049	0.990028	0.991235	226.684	-1.04044e+06	32.7543	-293.547	2728.59	119.409	-8.753	0	2.53108	2.88304	3.154	0.0899059	0
2000	1160	82.1799	0.989906	0.99115	224.426	-1.02986e+06	32.4411	-291.825	2709.3	118.164	-8.765	0	2.53002	2.88925	3.161	0.0913181	0
2000	1159	81.3531	0.989909	0.99115	222.166	-1.01932e+06	32.1283	-290.112	2690.12	116.922	-8.777	0	2.52896	2.88725	3.169	0.0927505	0
2000	1158	80.5349	0.990019	0.991248	219.932	-1.00888e+06	31.8188	-288.428	2671.25	115.695	-8.789	0	2.52791	2.88671	3.177	0.0941871	0
2000	1157	79.7338	0.990126	0.991345	217.744	-998656	31.5157	-286.775	2652.78	114.495	-8.8	0	2.52686	2.88617	3.184	0.0956279	0
2000	1156	78.9493	0.990232	0.991439	215.601	-988649	31.2188	-285.152	2634.69	113.319	-8.812	0	2.52582	2.88563	3.192	0.0970728	0
2000	1155	78.1808	0.990335	0.991532	213.502	-978849	30.9279	-283.56	2616.97	112.168	-8.824	0	2.52479	2.88508	3.199	0.0985216	0
2000	1154	77.428	0.990436	0.991622	211.444	-969248	30.6429	-281.996	2599.6	111.041	-8.836	0	2.52376	2.88453	3.206	0.0999744	0
2000	1153	76.6902	0.990535	0.991711	209.428	-959842	30.3635	-280.46	2582.58	109.936	-8.848	0	2.52274	2.88398	3.214	0.101431	0
2000	1152	75.9671	0.990632	0.991798	207.452	-950624	30.0897	-278.951	2565.89	108.854	-8.86	0	2.52172	2.88343	3.221	0.102892	0
2000	1151	75.2583	0.990727	0.991883	205.514	-941589	29.8211	-277.468	2549.53	107.793	-8.872	0	2.52072	2.88288	3.228	0.104356	0
2000	1150	74.5632	0.99082	0.991966	203.613	-932730	29.5578	-276.01	2533.48	106.753	-8.885	0	2.51971	2.88232	3.236	0.105824	0
2000	1149	73.8815	0.990911	0.992047	201.749	-924043	29.2994	-274.578	2517.74	105.733	-8.897	0	2.51872	2.88176	3.243	0.107295	0
2000	1148	73.2128	0.991001	0.992127	199.92	-915523	29.0459	-273.17	2502.3	104.734	-8.909	0	2.51773	2.8812	3.25	0.10877	0
2000	1147	72.5567	0.991088	0.992205	198.126	-907165	28.7971	-271.784	2487.14	103.753	-8.921	0	2.51674	2.88064	3.257	0.110249	0
2000	1146	71.9129	0.991174	0.992282	196.364	-898965	28.553	-270.422	2472.27	102.791	-8.933	0	2.51576	2.88008	3.264	0.111731	0
2000	1145	71.2809	0.991258	0.992357	194.635	-890917	28.3133	-269.082	2457.67	101.846	-8.945	0	2.51479	2.87951	3.271	0.113216	0
2000	1144	70.6606	0.991341	0.992431	192.938	-883018	28.0779	-267.763	2443.33	100.92	-8.957	0	2.51383	2.87895	3.278	0.114705	0
2000	1143	70.0516	0.991422	0.992503	191.271	-875263	27.8468	-266.465	2429.25	100.01	-8.969	0	2.51287	2.87838	3.285	0.116197	0
2000	1142	69.4534	0.991501	0.992574	189.633	-867648	27.6198	-265.188	2415.42	99.1173	-8.982	0	2.51191	2.87781	3.291	0.117692	0
2000	1141	68.866	0.991579	0.992643	188.025	-860171	27.3967	-263.93	2401.83	98.2405	-8.994	0	2.51096	2.87724	3.298	0.11919	0
2000	1140	68.2889	0.991656	0.992711	186.444	-852826	27.1776	-262.691	2388.48	97.3794	-9.006	0	2.51002	2.87667	3.305	0.120692	0
2000	1139	67.7218	0.991731	0.992778	184.892	-845610	26.9622	-261.472	2375.36	96.5335	-9.018	0	2.50908	2.8761	3.312	0.122197	0
2000	1138	67.1646	0.991804	0.992844	183.365	-838520	26.7505	-260.27	2362.47	95.7025	-9.031	0	2.50815	2.87553	3.318	0.123705	0
2000	1137	66.617	0.991877	0.992908	181.865	-831553	26.5424	-259.086	2349.79	94.8859	-9.043	0	2.50723	2.87495	3.325	0.125215	0
2000	1136	66.0786	0.991947	0.992971	180.39	-824705	26.3378	-257.92	2337.33	94.0834	-9.055	0	2.5063	2.87438	3.331	0.126729	0
2000	1135	65.5493	0.992017	0.993033	178.939	-817973	26.1365	-256.771	2325.07	93.2947	-9.067	0	2.50539	2.8738	3.338	0.128246	0
2000	1134	65.0289	0.992086	0.993094	177.513	-811354	25.9386	-255.638	2313.02	92.5193	-9.08	0	2.50448	2.87323	3.344	0.129765	0
2000	1133	64.517	0.992153	0.993154	176.11	-804846	25.744	-254.521	2301.16	91.757	-9.092	0	2.50358	2.87265	3.351	0.131288	0
2000	1132	64.0136	0.992219	0.993213	174.729	-798445	25.5524	-253.42	2289.49	91.0073	-9.105	0	2.50268	2.87207	3.357	0.132813	0
2000	1131	63.5183	0.992284	0.99327	173.371	-792148	25.3639	-252.334	2278.01	90.27	-9.117	0	2.50179	2.8715	3.363	0.134341	0
2000	1130	63.031	0.992347	0.993327	172.035	-785954	25.1785	-251.263	2266.72	89.5448	-9.129	0	2.5009	2.87092	3.37	0.135872	0
2000	1129	62.5514	0.99241	0.993383	170.719	-779860	24.9959	-250.206	2255.6	88.8313	-9.142	0	2.50002	2.87034	3.376	0.137406	0
2000	1128	62.0795	0.992471	0.993437	169.425	-773862	24.8162	-249.164	2244.65	88.1293	-9.154	0	2.49914	2.86977	3.382	0.138942	0
2000	1127	61.6149	0.992532	0.993491	168.15	-767960	24.6392	-248.135	2233.87	87.4385	-9.167	0	2.49827	2.86919	3.388	0.140481	0
2000	1126	61.1576	0.992591	0.993544	166.895	-762150	24.465	-247.121	2223.26	86.7586	-9.179	0	2.4974	2.86861	3.394	0.142022	0
2000	1125	60.7073	0.992649	0.993595	165.659	-756430	24.2934	-246.119	2212.81	86.0894	-9.192	0	2.49654	2.86803	3.4	0.143566	0
2000	1124	60.2639	0.992707	0.993646	164.442	-750798	24.1244	-245.13	2202.51	85.4306	-9.204	0	2.49568	2.86745	3.406	0.145113	0
2000	1123	59.8273	0.992763	0.993696	163.243	-745253	23.9579	-244.154	2192.37	84.7819	-9.217	0	2.49483	2.86688	3.412	0.146662	0
2000	1122	59.3972	0.992819	0.993746	162.062	-739791	23.7939	-243.19	2182.38	84.1432	-9.229	0	2.49399	2.8663	3.418	0.148214	0
2000	1121	58.9735	0.992873	0.993794	160.899	-734411	23.6323	-242.238	2172.54	83.5141	-9.242	0	2.49315	2.86572	3.424	0.149768	0
2000	1120	58.556	0.992927	0.993842	159.752	-729112	23.473	-241.298	2162.83	82.8945	-9.254	0	2.49231	2.86515	3.43	0.151325	0
2000	1119	58.1447	0.99298	0.993888	158.622	-723891	23.3161	-240.37	2153.27	82.2842	-9.267	0	2.49148	2.86457	3.436	0.152884	0
2000	1118	57.7394	0.993032	0.993934	157.508	-718746	23.1614	-239.453	2143.85	81.6828	-9.28	0	2.49065	2.864	3.441	0.154445	0
2000	1117	57.3399	0.993083	0.99398	156.411	-713676	23.0088	-238.546	2134.55	81.0904	-9.292	0	2.48983	2.86342	3.447	0.156009	0
2000	1116	56.9461	0.993133	0.994024	155.328	-708679	22.8584	-237.651	2125.39	80.5065	-9.305	0	2.48901	2.86285	3.453	0.157575	0
2000	1115	56.5579	0.993182	0.994068	154.261	-703754	22.7102	-236.766	2116.36	79.9311	-9.318	0	2.4882	2.86228	3.458	0.159144	0
2000	1114	56.1751	0.993231	0.994111	153.209	-698899	22.5639	-235.891	2107.45	79.3639	-9.33	0	2.48739	2.86171	3.464	0.160715	0
2000	1113	55.7978	0.993279	0.994154	152.172	-694112	22.4197	-235.027	2098.66	78.8048	-9.343	0	2.48659	2.86114	3.469	0.162288	0
2000	1112	55.4256	0.993326	0.994195	151.148	-689392	22.2774	-234.172	2089.99	78.2537	-9.356	0	2.48579	2.86057	3.475	0.163863	0
2000	1111	55.0586	0.993372	0.994236	150.139	-684737	22.1371	-233.327	2081.44	77.7102	-9.368	0	2.485	2.86	3.48	0.165441	0
2000	1110	54.6965	0.993418	0.994277	149.143	-680147	21.9986	-232.491	2073	77.1743	-9.381	0	2.48421	2.85943	3.486	0.167021	0
2000	1109	54.3394	0.993463	0.994317	148.16	-675619	21.862	-231.665	2064.67	76.6457	-9.394	0	2.48343	2.85887	3.491	0.168603	0
2000	1108	53.987	0.993507	0.994356	147.191	-671152	21.7272	-230.848	2056.45	76.1245	-9.407	0	2.48265	2.8583	3.497	0.170187	0
2000	1107	53.6394	0.993551	0.994394	146.234	-666745	21.5941	-230.04	2048.34	75.6103	-9.42	0	2.48187	2.85774	3.502	0.171773	0
2000	1106	53.2964	0.993594	0.994432	145.29	-662397	21.4628	-229.24	2040.34	75.103	-9.432	0	2.4811	2.85718	3.507	0.173362	0
2000	1105	52.9578	0.993636	0.99447	144.358	-658107	21.3332	-228.449	2032.43	74.6025	-9.445	0	2.48034	2.85662	3.512	0.174953	0
2000	1104	52.6237	0.993678	0.994507	143.438	-653873	21.2052	-227.666	2024.63	74.1087	-9.458	0	2.47957	2.85606	3.518	0.176545	0
2000	1103	52.2939	0.993719	0.994543	142.53	-649695	21.0788	-226.892	2016.92	73.6214	-9.471	0	2.47881	2.8555	3.523	0.17814	0
2000	1102	51.9683	0.993759	0.994579	141.634	-645570	20.9541	-226.125	2009.32	73.1405	-9.484	0	2.47806	2.85495	3.528	0.179737	0
2000	1101	51.6468	0.993799	0.994614	140.748	-641498	20.8309	-225.367	2001.8	72.6658	-9.497	0	2.47731	2.85439	3.533	0.181336	0
2000	1100	51.3295	0.993838	0.994649	139.874	-637479	20.7092	-224.616	1994.38	72.1973	-9.51	0	2.47657	2.85384	3.538	0.182937	0
2000	1099	51.0161	0.993877	0.994683	139.011	-633510	20.589	-223.873	1987.05	71.7347	-9.523	0	2.47582	2.85329	3.543	0.18454	0
2000	1098	50.7066	0.993915	0.994716	138.158	-629591	20.4703	-223.137	1979.81	71.2781	-9.536	0	2.47509	2.85275	3.548	0.186145	0
2000	1097	50.4009	0.993953	0.99475	137.316	-625721	20.353	-222.408	1972.65	70.8272	-9.549	0	2.47435	2.8522	3.553	0.187752	0
2000	1096	50.099	0.99399	0.994782	136.484	-621899	20.2371	-221.687	1965.58	70.382	-9.562	0	2.47363	2.85166	3.558	0.189361	0
2000	1095	49.8008	0.994026	0.994815	135.662	-618124	20.1227	-220.972	1958.6	69.9423	-9.575	0	2.4729	2.85112	3.562	0.190972	0
2000	1094	49.5062	0.994062	0.994846	134.85	-614395	20.0095	-220.265	1951.69	69.5081	-9.588	0	2.47218	2.85058	3.567	0.192585	0
2000	1093	49.2151	0.994098	0.994878	134.047	-610712	19.8977	-219.564	1944.87	69.0792	-9.601	0	2.47146	2.85004	3.572	0.1942	0
2000	1092	48.9275	0.994133	0.994908	133.254	-607073	19.7873	-218.87	1938.12	68.6555	-9.614	0	2.47075	2.84951	3.577	0.195816	0
2000	1091	48.6433	0.994167	0.994939	132.47	-603477	19.6781	-218.183	1931.46	68.237	-9.627	0	2.47004	2.84898	3.581	0.197435	0
2000	1090	48.3625	0.994201	0.994969	131.696	-599924	19.5701	-217.501	1924.86	67.8234	-9.64	0	2.46933	2.84845	3.586	0.199055	0
2000	1089	48.0849	0.994234	0.994998	130.93	-596413	19.4634	-216.827	1918.35	67.4149	-9.654	0	2.46863	2.84792	3.591	0.200678	0
2000	1088	47.8106	0.994267	0.995028	130.173	-592943	19.3579	-216.158	1911.9	67.0112	-9.667	0	2.46794	2.8474	3.595	0.202302	0
2000	1087	47.5394	0.9943	0.995056	129.425	-589514	19.2536	-215.495	1905.53	66.6122	-9.68	0	2.46724	2.84688	3.6	0.203928	0
2000	1086	47.2713	0.994332	0.995085	128.685	-586124	19.1505	-214.838	1899.23	66.218	-9.693	0	2.46655	2.84636	3.604	0.205556	0
2000	1085	47.0063	0.994364	0.995113	127.953	-582773	19.0485	-214.188	1893	65.8283	-9.706	0	2.46586	2.84585	3.609	0.207186	0
2000	1084	46.7443	0.994395	0.99514	127.23	-579460	18.9476	-213.543	1886.83	65.4431	-9.72	0	2.46518	2.84533	3.613	0.208817	0
2000	1083	46.4852	0.994426	0.995168	126.515	-576185	18.8478	-212.903	1880.73	65.0623	-9.733	0	2.4645	2.84483	3.618	0.21045	0
2000	1082	46.229	0.994456	0.995194	125.807	-572947	18.7492	-212.269	1874.7	64.6859	-9.746	0	2.46382	2.84432	3.622	0.212085	0
2000	1081	45.9756	0.994486	0.995221	125.108	-569745	18.6516	-211.641	1868.73	64.3137	-9.76	0	2.46315	2.84382	3.626	0.213722	0
2000	1080	45.725	0.994516	0.995247	124.416	-566578	18.555	-211.018	1862.83	63.9458	-9.773	0	2.46248	2.84332	3.631	0.215361	0
2000	1079	45.4772	0.994545	0.995273	123.731	-563447	18.4595	-210.4	1856.98	63.5819	-9.786	0	2.46182	2.84282	3.635	0.217001	0
2000	1078	45.232	0.994574	0.995298	123.054	-560350	18.365	-209.787	1851.2	63.2221	-9.8	0	2.46116	2.84233	3.639	0.218643	0
2000	1077	44.9895	0.994603	0.995323	122.384	-557286	18.2715	-209.18	1845.48	62.8663	-9.813	0	2.4605	2.84184	3.643	0.220287	0
2000	1076	44.7496	0.994631	0.995348	121.721	-554256	18.1789	-208.577	1839.82	62.5144	-9.827	0	2.45984	2.84135	3.648	0.221932	0
2000	1075	44.5122	0.994658	0.995373	121.065	-551258	18.0873	-207.98	1834.21	62.1663	-9.84	0	2.45919	2.84087	3.652	0.223579	0
2000	1074	44.2773	0.994686	0.995397	120.416	-548292	17.9967	-207.387	1828.66	61.822	-9.853	0	2.45854	2.84039	3.656	0.225228	0
2000	1073	44.0449	0.994713	0.995421	119.773	-545358	17.907	-206.799	1823.17	61.4814	-9.867	0	2.4579	2.83991	3.66	0.226878	0
2000	1072	43.815	0.994739	0.995444	119.137	-542455	17.8182	-206.216	1817.73	61.1444	-9.88	0	2.45725	2.83944	3.664	0.228531	0
2000	1071	43.5874	0.994766	0.995467	118.508	-539582	17.7303	-205.637	1812.34	60.811	-9.894	0	2.45662	2.83897	3.668	0.230184	0
2000	1070	43.3621	0.994792	0.99549	117.885	-536739	17.6433	-205.063	1807.01	60.4812	-9.907	0	2.45598	2.83851	3.672	0.23184	0
2000	1069	43.1392	0.994817	0.995513	117.269	-533926	17.5572	-204.493	1801.73	60.1548	-9.921	0	2.45535	2.83805	3.676	0.233497	0
2000	1068	42.9185	0.994843	0.995535	116.659	-531142	17.4719	-203.928	1796.5	59.8318	-9.935	0	2.45472	2.83759	3.68	0.235155	0
2000	1067	42.7001	0.994868	0.995557	116.054	-528386	17.3875	-203.367	1791.32	59.5121	-9.948	0	2.45409	2.83714	3.684	0.236816	0
2000	1066	42.4839	0.994892	0.995579	115.456	-525658	17.3039	-202.811	1786.2	59.1958	-9.962	0	2.45347	2.83669	3.687	0.238477	0
2000	1065	42.2698	0.994917	0.995601	114.864	-522958	17.2211	-202.258	1781.12	58.8827	-9.975	0	2.45285	2.83625	3.691	0.240141	0
2000	1064	42.0579	0.994941	0.995622	114.277	-520284	17.1391	-201.71	1776.08	58.5728	-9.989	0	2.45223	2.83581	3.695	0.241806	0
2000	1063	41.848	0.994965	0.995643	113.697	-517638	17.0579	-201.166	1771.1	58.266	-10.003	0	2.45162	2.83537	3.699	0.243472	0
2000	1062	41.6402	0.994988	0.995664	113.121	-515018	16.9775	-200.626	1766.16	57.9623	-10.016	0	2.45101	2.83494	3.703	0.24514	0
2000	1061	41.4344	0.995011	0.995684	112.552	-512423	16.8978	-200.09	1761.27	57.6617	-10.03	0	2.4504	2.83451	3.706	0.24681	0
2000	1060	41.2306	0.995034	0.995705	111.988	-509854	16.8189	-199.557	1756.42	57.3641	-10.044	0	2.4498	2.83409	3.71	0.248481	0
2000	1059	41.0288	0.995057	0.995725	111.429	-507310	16.7407	-199.029	1751.62	57.0694	-10.058	0	2.44919	2.83367	3.713	0.250153	0
2000	1058	40.8289	0.995079	0.995744	110.876	-504791	16.6633	-198.504	1746.86	56.7775	-10.071	0	2.44859	2.83326	3.717	0.251827	0
2000	1057	40.6309	0.995101	0.995764	110.327	-502296	16.5866	-197.983	1742.14	56.4886	-10.085	0	2.448	2.83285	3.721	0.253503	0
2000	1056	40.4348	0.995123	0.995783	109.784	-499825	16.5106	-197.466	1737.46	56.2024	-10.099	0	2.4474	2.83244	3.724	0.25518	0
2000	1055	40.2406	0.995145	0.995802	109.246	-497378	16.4353	-196.952	1732.83	55.9191	-10.113	0	2.44681	2.83204	3.728	0.256858	0
2000	1054	40.0481	0.995166	0.995821	108.713	-494954	16.3606	-196.442	1728.23	55.6384	-10.127	0	2.44622	2.83165	3.731	0.258538	0
2000	1053	39.8574	0.995187	0.99584	108.185	-492552	16.2867	-195.935	1723.68	55.3604	-10.141	0	2.44564	2.83126	3.735	0.26022	0
2000	1052	39.6685	0.995208	0.995858	107.661	-490173	16.2134	-195.432	1719.17	55.0851	-10.155	0	2.44505	2.83087	3.738	0.261903	0
2000	1051	39.4814	0.995228	0.995876	107.143	-487816	16.1408	-194.933	1714.69	54.8124	-10.169	0	2.44448	2.83049	3.741	0.263587	0
2000	1050	39.2959	0.995249	0.995894	106.629	-485481	16.0688	-194.436	1710.26	54.5422	-10.183	0	2.4439	2.83012	3.745	0.265273	0
2000	1049	39.1121	0.995269	0.995912	106.119	-483168	15.9974	-193.943	1705.86	54.2745	-10.196	0	2.44332	2.82975	3.748	0.26696	0
2000	1048	38.93	0.995279	0.995924	105.615	-480876	15.9267	-193.453	1701.49	54.0092	-10.21	0	2.44274	2.83107	3.751	0.268651	0
2000	1047	38.7494	0.995277	0.995929	105.114	-478604	15.8565	-192.966	1697.13	53.746	-10.224	0	2.44215	2.83517	3.755	0.270349	0
2000	1046	38.5703	0.995278	0.995936	104.617	-476350	15.7869	-192.481	1692.81	53.485	-10.239	0	2.44156	2.83923	3.758	0.272048	0
2000	1045	38.3921	0.995295	0.995952	104.123	-474112	15.7178	-192	1688.52	53.2257	-10.253	0	2.44097	2.83944	3.761	0.273749	0
2000	1044	38.2154	0.995313	0.995969	103.634	-471894	15.6493	-191.522	1684.26	52.9688	-10.267	0	2.44039	2.83923	3.765	0.275451	0
2000	1043	38.0402	0.995331	0.995985	103.148	-469696	15.5813	-191.047	1680.04	52.7141	-10.281	0	2.4398	2.83903	3.768	0.277155	0
2000	1042	37.8666	0.995349	0.996001	102.667	-467518	15.5139	-190.575	1675.85	52.4617	-10.295	0	2.43922	2.83885	3.771	0.27886	0
2000	1041	37.6944	0.995367	0.996017	102.19	-465358	15.4471	-190.106	1671.69	52.2116	-10.309	0	2.43864	2.83867	3.775	0.280567	0
2000	1040	37.5237	0.995384	0.996033	101.717	-463217	15.3808	-189.64	1667.57	51.9636	-10.323	0	2.43806	2.8385	3.778	0.282275	0
2000	1039	37.3545	0.995402	0.996049	101.248	-461095	15.3151	-189.177	1663.48	51.7178	-10.337	0	2.43749	2.83834	3.781	0.283984	0
2000	1038	37.1867	0.995419	0.996064	100.783	-458991	15.2499	-188.716	1659.42	51.4742	-10.352	0	2.43691	2.8382	3.784	0.285696	0
2000	1037	37.0203	0.995435	0.996079	100.322	-456905	15.1852	-188.259	1655.39	51.2327	-10.366	0	2.43634	2.83806	3.787	0.287408	0
2000	1036	36.8552	0.995452	0.996094	99.8642	-454837	15.1211	-187.804	1651.4	50.9932	-10.38	0	2.43576	2.83794	3.79	0.289122	0
2000	1035	36.6916	0.995468	0.996109	99.4105	-452787	15.0575	-187.352	1647.43	50.7558	-10.394	0	2.4352	2.83783	3.793	0.290838	0
2000	1034	36.5293	0.995484	0.996123	98.9604	-450754	14.9944	-186.902	1643.49	50.5204	-10.409	0	2.43463	2.83773	3.796	0.292555	0
2000	1033	36.3683	0.9955	0.996138	98.5141	-448737	14.9319	-186.456	1639.58	50.287	-10.423	0	2.43406	2.83764	3.799	0.294273	0
2000	1032	36.2086	0.995516	0.996152	98.0713	-446738	14.8698	-186.012	1635.7	50.0555	-10.437	0	2.43349	2.83757	3.802	0.295993	0
2000	1031	36.0502	0.995531	0.996166	97.6321	-444755	14.8082	-185.57	1631.85	49.826	-10.452	0	2.43293	2.83751	3.805	0.297715	0
2000	1030	35.8931	0.995547	0.99618	97.1963	-442789	14.7471	-185.131	1628.03	49.5984	-10.466	0	2.43236	2.83746	3.808	0.299438	0
2000	1029	35.7372	0.995562	0.996194	96.764	-440839	14.6864	-184.695	1624.23	49.3726	-10.48	0	2.4318	2.83743	3.811	0.301162	0
2000	1028	35.5825	0.995576	0.996207	96.3351	-438904	14.6263	-184.261	1620.46	49.1487	-10.495	0	2.43124	2.83741	3.814	0.302888	0
2000	1027	35.4291	0.995591	0.99622	95.9095	-436985	14.5666	-183.83	1616.72	48.9266	-10.509	0	2.43068	2.83741	3.817	0.304616	0
2000	1026	35.2769	0.995605	0.996234	95.4872	-435082	14.5073	-183.401	1613	48.7063	-10.524	0	2.43012	2.83742	3.82	0.306344	0
2000	1025	35.1258	0.995619	0.996247	95.0682	-433194	14.4485	-182.974	1609.31	48.4877	-10.538	0	2.42957	2.83745	3.823	0.308075	0
2000	1024	34.9759	0.995633	0.996259	94.6524	-431321	14.3902	-182.55	1605.64	48.2709	-10.553	0	2.42901	2.83749	3.826	0.309807	0
2000	1023	34.8271	0.995647	0.996272	94.2397	-429463	14.3323	-182.128	1602.03	48.0567	-10.567	0	2.42845	2.83755	3.829	0.31154	0
2000	1022	34.6795	0.99566	0.996284	93.8301	-427619	14.2748	-181.709	1598.41	47.8432	-10.582	0	2.42789	2.83762	3.831	0.313275	0
2000	1021	34.5329	0.995673	0.996296	93.4236	-425789	14.2178	-181.292	1594.82	47.6315	-10.596	0	2.42734	2.83771	3.834	0.315011	0
2000	1020	34.3875	0.995686	0.996308	93.0201	-423974	14.1611	-180.876	1591.25	47.4214	-10.611	0	2.42678	2.83781	3.837	0.316749	0
2000	1019	34.2431	0.995698	0.99632	92.6196	-422173	14.1049	-180.464	1587.7	47.2129	-10.626	0	2.42623	2.83793	3.84	0.318489	0
2000	1018	34.0998	0.995711	0.996332	92.2219	-420385	14.0491	-180.053	1584.18	47.0059	-10.64	0	2.42567	2.83807	3.842	0.32023	0
2000	1017	33.9575	0.995723	0.996343	91.8272	-418612	13.9937	-179.645	1580.67	46.8006	-10.655	0	2.42512	2.83823	3.845	0.321973	0
2000	1016	33.8163	0.995735	0.996355	91.4353	-416851	13.9387	-179.238	1577.19	46.5967	-10.67	0	2.42457	2.83841	3.848	0.323717	0
2000	1015	33.676	0.995747	0.996366	91.0462	-415104	13.8841	-178.834	1573.74	46.3944	-10.684	0	2.42401	2.83861	3.85	0.325463	0
2000	1014	33.5368	0.995758	0.996377	90.6599	-413369	13.8298	-178.432	1570.3	46.1936	-10.699	0	2.42346	2.83882	3.853	0.32721	0
2000	1013	33.3985	0.995769	0.996387	90.2762	-411648	13.776	-178.032	1566.88	45.9943	-10.714	0	2.4229	2.83906	3.856	0.328959	0
2000	1012	33.2612	0.99578	0.996398	89.8953	-409939	13.7225	-177.633	1563.48	45.7964	-10.729	0	2.42235	2.83932	3.858	0.33071	0
2000	1011	33.1249	0.995791	0.996408	89.517	-408242	13.6694	-177.237	1560.11	45.5999	-10.744	0	2.42179	2.83961	3.861	0.332463	0
2000	1010	32.9894	0.995802	0.996418	89.1413	-406558	13.6166	-176.843	1556.75	45.4048	-10.758	0	2.42124	2.83991	3.863	0.334217	0
2000	1009	32.8549	0.995812	0.996428	88.7681	-404886	13.5642	-176.451	1553.41	45.2111	-10.773	0	2.42068	2.84024	3.866	0.335972	0
2000	1008	32.7213	0.995822	0.996438	88.3975	-403226	13.5122	-176.061	1550.09	45.0188	-10.788	0	2.42012	2.8406	3.868	0.33773	0
2000	1007	32.5886	0.995832	0.996448	88.0293	-401578	13.4605	-175.672	1546.79	44.8278	-10.803	0	2.41956	2.84099	3.871	0.339489	0
2000	1006	32.4568	0.995841	0.996457	87.6635	-399941	13.4091	-175.286	1543.51	44.6382	-10.818	0	2.41901	2.84141	3.874	0.34125	0
2000	1005	32.3258	0.99585	0.996466	87.3002	-398316	13.3581	-174.901	1540.24	44.4498	-10.833	0	2.41845	2.84187	3.876	0.343013	0
2000	1004	32.1957	0.995859	0.996475	86.9392	-396702	13.3074	-174.518	1536.99	44.2627	-10.848	0	2.41788	2.84238	3.878	0.344777	0
2000	1003	32.0664	0.995867	0.996484	86.5805	-395099	13.257	-174.137	1533.76	44.0768	-10.863	0	2.41732	2.84294	3.881	0.346544	0
2000	1002	31.9379	0.995875	0.996492	86.2241	-393507	13.207	-173.757	1530.54	43.8921	-10.878	0	2.41675	2.84357	3.883	0.348312	0
2000	1001	31.8101	0.995882	0.9965	85.8698	-391925	13.1573	-173.379	1527.34	43.7087	-10.893	0	2.41618	2.84431	3.886	0.350083	0
2000	1000	31.6832	0.995888	0.996507	85.5177	-390354	13.1079	-173.003	1524.15	43.5264	-10.908	0	2.41561	2.8452	3.888	0.351855	0
2000	999	31.5569	0.995893	0.996513	85.1676	-388794	13.0587	-172.629	1520.97	43.3451	-10.923	0	2.41503	2.84635	3.891	0.353631	0
2000	998	31.4313	0.995895	0.996517	84.8194	-387242	13.0099	-172.256	1517.81	43.1649	-10.938	0	2.41445	2.84799	3.893	0.35541	0
2000	997	31.3063	0.99589	0.996517	84.4729	-385700	12.9613	-171.884	1514.64	42.9855	-10.953	0	2.41385	2.85077	3.896	0.357194	0
2000	996	31.1817	0.995863	0.996503	84.1273	-384166	12.9129	-171.513	1511.45	42.8065	-10.968	0	2.41322	2.85736	3.898	0.358989	0
2000	995	31.0568	0.995891	0.996525	83.7818	-382632	12.8645	-171.144	1508.29	42.6278	-10.984	0	2.41261	2.85423	3.901	0.360781	0
2000	994	30.9338	0.995086	0.996018	83.4328	-381132	12.8167	-170.757	1504.4	42.4434	-10.999	0	2.41128	2.97873	3.906	0.362789	0
2000	993	30.7863	0.995109	0.996038	83.0335	-379444	12.7627	-170.366	1500.33	42.2352	-11.014	0	2.40996	2.97789	3.912	0.364797	0
2000	992	30.6404	0.995132	0.996058	82.6381	-377771	12.7091	-169.977	1496.3	42.029	-11.029	0	2.40865	2.97706	3.917	0.366804	0
2000	991	30.4958	0.995155	0.996078	82.2465	-376114	12.6561	-169.591	1492.31	41.8249	-11.045	0	2.40734	2.97624	3.922	0.368809	0
2000	990	30.3526	0.995178	0.996097	81.8586	-374474	12.6035	-169.208	1488.36	41.6228	-11.06	0	2.40604	2.97543	3.928	0.370813	0
2000	989	30.2109	0.9952	0.996116	81.4743	-372849	12.5514	-168.827	1484.44	41.4227	-11.075	0	2.40475	2.97463	3.933	0.372817	0
2000	988	30.0704	0.995222	0.996135	81.0937	-371239	12.4998	-168.449	1480.56	41.2245	-11.091	0	2.40346	2.97385	3.938	0.374819	0
2000	987	29.9313	0.995244	0.996153	80.7165	-369644	12.4487	-168.073	1476.71	41.0282	-11.106	0	2.40218	2.97308	3.943	0.37682	0
2000	986	29.7935	0.995265	0.996172	80.3429	-368065	12.398	-167.7	1472.9	40.8338	-11.121	0	2.4009	2.97232	3.948	0.37882	0
2000	985	29.657	0.995286	0.99619	79.9727	-366500	12.3478	-167.329	1469.13	40.6412	-11.137	0	2.39963	2.97157	3.953	0.380819	0
2000	984	29.5218	0.995307	0.996208	79.6058	-364949	12.298	-166.961	1465.38	40.4505	-11.152	0	2.39837	2.97084	3.958	0.382817	0
2000	983	29.3878	0.995328	0.996226	79.2423	-363413	12.2486	-166.595	1461.68	40.2615	-11.168	0	2.39711	2.97011	3.963	0.384813	0
2000	982	29.2551	0.995348	0.996243	78.8821	-361891	12.1997	-166.231	1458	40.0744	-11.183	0	2.39586	2.9694	3.968	0.386809	0
2000	981	29.1235	0.995369	0.996261	78.5252	-360382	12.1512	-165.869	1454.35	39.8889	-11.199	0	2.39461	2.9687	3.973	0.388803	0
2000	980	28.9932	0.995389	0.996278	78.1714	-358888	12.1032	-165.51	1450.74	39.7052	-11.214	0	2.39337	2.96801	3.978	0.390796	0
2000	979	28.864	0.995408	0.996295	77.8207	-357407	12.0555	-165.153	1447.16	39.5232	-11.23	0	2.39213	2.96733	3.982	0.392788	0
2000	978	28.7361	0.995428	0.996312	77.4732	-355939	12.0083	-164.799	1443.61	39.3428	-11.246	0	2.3909	2.96666	3.987	0.394778	0
2000	977	28.6092	0.995447	0.996329	77.1287	-354484	11.9614	-164.446	1440.09	39.1641	-11.261	0	2.38967	2.96601	3.992	0.396768	0
2000	976	28.4835	0.995466	0.996345	76.7872	-353042	11.915	-164.096	1436.6	38.987	-11.277	0	2.38845	2.96536	3.996	0.398756	0
2000	975	28.3589	0.995485	0.996362	76.4487	-351612	11.8689	-163.748	1433.13	38.8115	-11.293	0	2.38724	2.96473	4.001	0.400743	0
2000	974	28.2354	0.995504	0.996378	76.1131	-350195	11.8233	-163.402	1429.7	38.6376	-11.308	0	2.38603	2.96411	4.005	0.402729	0
2000	973	28.113	0.995523	0.996394	75.7804	-348791	11.778	-163.058	1426.3	38.4652	-11.324	0	2.38482	2.9635	4.01	0.404713	0
2000	972	27.9916	0.995541	0.996409	75.4505	-347399	11.7331	-162.716	1422.92	38.2943	-11.34	0	2.38362	2.9629	4.014	0.406696	0
2000	971	27.8713	0.995559	0.996425	75.1234	-346019	11.6885	-162.376	1419.57	38.125	-11.355	0	2.38243	2.96231	4.019	0.408678	0
2000	970	27.7521	0.995577	0.996441	74.7991	-344650	11.6444	-162.038	1416.25	37.9571	-11.371	0	2.38124	2.96173	4.023	0.410659	0
2000	969	27.6338	0.995595	0.996456	74.4776	-343294	11.6006	-161.702	1412.95	37.7907	-11.387	0	2.38005	2.96117	4.027	0.412638	0
2000	968	27.5166	0.995612	0.996471	74.1587	-341948	11.5571	-161.368	1409.68	37.6257	-11.403	0	2.37887	2.96061	4.032	0.414616	0
2000	967	27.4004	0.995629	0.996486	73.8425	-340615	11.514	-161.036	1406.44	37.4622	-11.419	0	2.37769	2.96007	4.036	0.416593	0
2000	966	27.2851	0.995647	0.996501	73.5289	-339292	11.4713	-160.706	1403.22	37.3001	-11.435	0	2.37652	2.95954	4.04	0.418568	0
2000	965	27.1709	0.995664	0.996516	73.2179	-337981	11.4289	-160.378	1400.03	37.1393	-11.451	0	2.37535	2.95901	4.044	0.420542	0
2000	964	27.0575	0.99568	0.996531	72.9094	-336681	11.3868	-160.051	1396.86	36.9799	-11.467	0	2.37419	2.9585	4.048	0.422514	0
2000	963	26.9452	0.995697	0.996545	72.6035	-335391	11.3451	-159.727	1393.71	36.8219	-11.483	0	2.37303	2.958	4.052	0.424485	0
2000	962	26.8337	0.995713	0.996559	72.3001	-334112	11.3037	-159.404	1390.59	36.6652	-11.499	0	2.37188	2.95751	4.056	0.426455	0
2000	961	26.7232	0.99573	0.996574	71.9991	-332844	11.2626	-159.083	1387.5	36.5098	-11.515	0	2.37073	2.95703	4.06	0.428423	0
2000	960	26.6136	0.995746	0.996588	71.7005	-331586	11.2218	-158.764	1384.42	36.3557	-11.531	0	2.36959	2.95657	4.064	0.43039	0
2000	959	26.5049	0.995762	0.996602	71.4043	-330338	11.1814	-158.446	1381.38	36.2029	-11.547	0	2.36845	2.95611	4.068	0.432356	0
2000	958	26.397	0.995778	0.996615	71.1105	-329101	11.1413	-158.131	1378.35	36.0514	-11.563	0	2.36731	2.95567	4.072	0.43432	0
2000	957	26.29	0.995793	0.996629	70.819	-327873	11.1015	-157.817	1375.34	35.9011	-11.579	0	2.36618	2.95523	4.076	0.436282	0
2000	956	26.1839	0.995809	0.996643	70.5298	-326656	11.0619	-157.505	1372.36	35.752	-11.595	0	2.36505	2.9548	4.08	0.438243	0
2000	955	26.0787	0.995824	0.996656	70.2429	-325448	11.0227	-157.194	1369.4	35.6041	-11.611	0	2.36392	2.95439	4.083	0.440203	0
2000	954	25.9743	0.99584	0.996669	69.9582	-324250	10.9838	-156.885	1366.46	35.4575	-11.628	0	2.3628	2.95399	4.087	0.442161	0
2000	953	25.8707	0.995855	0.996683	69.6758	-323061	10.9452	-156.578	1363.54	35.312	-11.644	0	2.36169	2.9536	4.091	0.444118	0
2000	952	25.7679	0.99587	0.996696	69.3955	-321882	10.9069	-156.272	1360.65	35.1677	-11.66	0	2.36057	2.95322	4.094	0.446073	0
2000	951	25.666	0.995884	0.996709	69.1174	-320712	10.8689	-155.968	1357.77	35.0245	-11.676	0	2.35947	2.95284	4.098	0.448026	0
2000	950	25.5648	0.995899	0.996722	68.8414	-319552	10.8311	-155.666	1354.91	34.8825	-11.693	0	2.35836	2.95248	4.102	0.449978	0
2000	949	25.4644	0.995914	0.996734	68.5676	-318400	10.7937	-155.365	1352.08	34.7416	-11.709	0	2.35726	2.95214	4.105	0.451928	0
2000	948	25.3648	0.995928	0.996747	68.2958	-317258	10.7565	-155.066	1349.26	34.6018	-11.725	0	2.35616	2.9518	4.109	0.453877	0
2000	947	25.266	0.995942	0.99676	68.0261	-316124	10.7196	-154.768	1346.46	34.4631	-11.742	0	2.35507	2.95147	4.112	0.455824	0
2000	946	25.168	0.995956	0.996772	67.7584	-314999	10.6829	-154.472	1343.69	34.3255	-11.758	0	2.35398	2.95115	4.116	0.457769	0
2000	945	25.0706	0.99597	0.996784	67.4928	-313883	10.6465	-154.178	1340.93	34.189	-11.775	0	2.35289	2.95085	4.119	0.459713	0
2000	944	24.9741	0.995984	0.996797	67.2291	-312775	10.6104	-153.884	1338.19	34.0535	-11.791	0	2.35181	2.95055	4.122	0.461655	0
2000	943	24.8783	0.995998	0.996809	66.9674	-311676	10.5746	-153.593	1335.47	33.9191	-11.808	0	2.35073	2.95027	4.126	0.463596	0
2000	942	24.7831	0.996012	0.996821	66.7076	-310585	10.539	-153.303	1332.76	33.7857	-11.824	0	2.34965	2.94999	4.129	0.465535	0
2000	941	24.6888	0.996025	0.996833	66.4498	-309503	10.5037	-153.014	1330.08	33.6533	-11.841	0	2.34858	2.94973	4.132	0.467472	0
2000	940	24.5951	0.996039	0.996845	66.1938	-308429	10.4686	-152.727	1327.41	33.522	-11.857	0	2.34751	2.94948	4.135	0.469407	0
2000	939	24.5021	0.996052	0.996856	65.9398	-307363	10.4338	-152.441	1324.76	33.3916	-11.874	0	2.34645	2.94923	4.139	0.471341	0
2000	938	24.4098	0.996065	0.996868	65.6875	-306304	10.3992	-152.156	1322.13	33.2622	-11.891	0	2.34538	2.949	4.142	0.473273	0
2000	937	24.3182	0.996078	0.99688	65.4372	-305254	10.3649	-151.873	1319.51	33.1338	-11.907	0	2.34432	2.94878	4.145	0.475203	0
2000	936	24.2273	0.996091	0.996891	65.1886	-304212	10.3308	-151.592	1316.91	33.0064	-11.924	0	2.34327	2.94857	4.148	0.477131	0
2000	935	24.137	0.996104	0.996903	64.9418	-303177	10.297	-151.311	1314.33	32.8799	-11.941	0	2.34221	2.94837	4.151	0.479058	0
2000	934	24.0474	0.996117	0.996914	64.6968	-302151	10.2634	-151.033	1311.76	32.7544	-11.958	0	2.34116	2.94819	4.154	0.480983	0
2000	933	23.9585	0.996129	0.996925	64.4535	-301131	10.23	-150.755	1309.21	32.6297	-11.974	0	2.34012	2.94801	4.157	0.482906	0
2000	932	23.8702	0.996142	0.996936	64.212	-300119	10.1969	-150.479	1306.68	32.506	-11.991	0	2.33907	2.94784	4.16	0.484827	0
2000	931	23.7826	0.996154	0.996947	63.9722	-299115	10.164	-150.204	1304.16	32.3833	-12.008	0	2.33803	2.94768	4.163	0.486746	0
2000	930	23.6956	0.996167	0.996958	63.7341	-298118	10.1313	-149.93	1301.66	32.2614	-12.025	0	2.33699	2.94754	4.166	0.488664	0
2000	929	23.6092	0.996179	0.996969	63.4977	-297129	10.0988	-149.658	1299.18	32.1404	-12.042	0	2.33596	2.9474	4.169	0.490579	0
2000	928	23.5234	0.996191	0.99698	63.2629	-296146	10.0666	-149.387	1296.7	32.0202	-12.059	0	2.33493	2.94728	4.171	0.492493	0
2000	927	23.4382	0.996203	0.996991	63.0298	-295171	10.0346	-149.117	1294.25	31.901	-12.076	0	2.3339	2.94717	4.174	0.494405	0
2000	926	23.3537	0.996215	0.997002	62.7983	-294202	10.0028	-148.849	1291.81	31.7826	-12.093	0	2.33287	2.94706	4.177	0.496315	0
2000	925	23.2697	0.996227	0.997012	62.5684	-293241	9.97123	-148.582	1289.38	31.6651	-12.11	0	2.33185	2.94697	4.18	0.498223	0
2000	924	23.1864	0.996239	0.997023	62.3401	-292287	9.93987	-148.316	1286.97	31.5484	-12.127	0	2.33083	2.94689	4.182	0.500129	0
2000	923	23.1036	0.996251	0.997033	62.1133	-291339	9.90873	-148.051	1284.57	31.4325	-12.144	0	2.32981	2.94682	4.185	0.502033	0
2000	922	23.0214	0.996262	0.997044	61.8882	-290399	9.8778	-147.788	1282.19	31.3175	-12.161	0	2.32879	2.94676	4.188	0.503935	0
2000	921	22.9398	0.996274	0.997054	61.6645	-289465	9.84707	-147.526	1279.82	31.2033	-12.178	0	2.32778	2.9467	4.19	0.505835	0
2000	920	22.8587	0.996285	0.997065	61.4424	-288537	9.81655	-147.265	1277.46	31.0898	-12.195	0	2.32677	2.94666	4.193	0.507733	0
2000	919	22.7783	0.996297	0.997075	61.2218	-287617	9.78624	-147.005	1275.12	30.9772	-12.212	0	2.32576	2.94663	4.196	0.509628	0
2000	918	22.6983	0.996308	0.997085	61.0027	-286702	9.75613	-146.746	1272.79	30.8654	-12.23	0	2.32476	2.94661	4.198	0.511522	0
2000	917	22.619	0.996319	0.997095	60.7851	-285795	9.72622	-146.489	1270.47	30.7544	-12.247	0	2.32376	2.9466	4.201	0.513414	0
2000	916	22.5401	0.996331	0.997105	60.569	-284893	9.6965	-146.232	1268.17	30.6441	-12.264	0	2.32276	2.9466	4.203	0.515304	0
2000	915	22.4618	0.996342	0.997115	60.3543	-283998	9.66699	-145.977	1265.88	30.5346	-12.281	0	2.32176	2.94661	4.206	0.517191	0
2000	914	22.3825	0.991003	0.993478	60.1032	-283128	9.63474	-145.562	1261.56	30.3905	-12.299	0	2.31732	3.20491	4.218	0.52198	0
2000	913	22.183	0.996323	0.997045	59.638	-281056	9.56971	-145.256	1258.09	30.1522	-12.316	0	2.31636	2.88443	4.221	0.524077	0
2000	912	22.1032	0.996332	0.997054	59.4199	-280129	9.53924	-144.989	1255.84	30.0409	-12.333	0	2.3154	2.88492	4.223	0.526172	0
2000	911	22.0239	0.996342	0.997063	59.2033	-279208	9.50896	-144.724	1253.61	29.9304	-12.351	0	2.31445	2.88539	4.225	0.528266	0
2000	910	21.9453	0.996264	0.997036	58.9876	-278297	9.47901	-144.46	1251.3	29.82	-12.368	0	2.31336	2.91818	4.228	0.530371	0
2000	909	21.8665	0.99618	0.997005	58.7715	-277393	9.44919	-144.199	1248.95	29.7095	-12.386	0	2.3122	2.95114	4.231	0.532481	0
2000	908	21.7861	0.996196	0.997018	58.5531	-276489	9.41917	-143.939	1246.6	29.5979	-12.403	0	2.31104	2.95065	4.233	0.534587	0
2000	907	21.7063	0.996211	0.997031	58.3362	-275592	9.38937	-143.679	1244.26	29.4872	-12.421	0	2.30989	2.95016	4.236	0.536689	0
2000	906	21.6272	0.996226	0.997043	58.1211	-274702	9.3598	-143.421	1241.94	29.3774	-12.438	0	2.30875	2.94966	4.239	0.538787	0
2000	905	21.5486	0.996241	0.997056	57.9076	-273819	9.33044	-143.165	1239.64	29.2685	-12.456	0	2.30761	2.94917	4.242	0.540882	0
2000	904	21.4707	0.996256	0.997069	57.6956	-272942	9.3013	-142.909	1237.35	29.1604	-12.474	0	2.30648	2.94867	4.244	0.542972	0
2000	903	21.3934	0.99627	0.997081	57.4853	-272072	9.27237	-142.655	1235.08	29.0532	-12.491	0	2.30535	2.94817	4.247	0.545059	0
2000	902	21.3168	0.996285	0.997094	57.2766	-271209	9.24365	-142.402	1232.82	28.9468	-12.509	0	2.30423	2.94767	4.25	0.547142	0
2000	901	21.2407	0.9963	0.997106	57.0695	-270352	9.21514	-142.15	1230.57	28.8413	-12.527	0	2.30311	2.94717	4.252	0.549221	0
2000	900	21.1652	0.996315	0.997119	56.8639	-269502	9.18684	-141.899	1228.34	28.7365	-12.544	0	2.302	2.94667	4.255	0.551295	0
Title:	R-magma	-	mresidual	from	MZ-magma	at	T	=	1145	C
Liquid	Composition:
Pressure	Temperature	mass	SiO2	TiO2	Al2O3	Fe2O3	Cr2O3	FeO	MnO	MgO	CaO	Na2O	K2O	H2O
2000	1400	99.9956	55.6847	0.151335	17.0883	1.04768	0.00460845	5.877	0.145523	6.10163	8.88673	4.09126	0.112218	0.808987
2000	1400	99.9956	55.6847	0.151335	17.0883	1.04768	0.00460845	5.877	0.145523	6.10163	8.88673	4.09126	0.112218	0.808987
2000	1399	99.9957	55.6847	0.151335	17.0883	1.0478	0.00460845	5.87689	0.145523	6.10163	8.88673	4.09126	0.112218	0.808987
2000	1398	99.9957	55.6847	0.151335	17.0883	1.04793	0.00460845	5.87677	0.145523	6.10163	8.88673	4.09126	0.112218	0.808987
2000	1397	99.9957	55.6847	0.151335	17.0883	1.04805	0.00460845	5.87666	0.145522	6.10163	8.88673	4.09126	0.112218	0.808987
2000	1396	99.9957	55.6846	0.151335	17.0883	1.04818	0.00460845	5.87655	0.145522	6.10163	8.88673	4.09126	0.112218	0.808986
2000	1395	99.9957	55.6846	0.151335	17.0883	1.0483	0.00460845	5.87644	0.145522	6.10163	8.88673	4.09126	0.112218	0.808986
2000	1394	99.9957	55.6846	0.151335	17.0883	1.04843	0.00460845	5.87632	0.145522	6.10163	8.88672	4.09126	0.112218	0.808986
2000	1393	99.9957	55.6846	0.151335	17.0883	1.04856	0.00460845	5.8762	0.145522	6.10163	8.88672	4.09126	0.112218	0.808986
2000	1392	99.9957	55.6846	0.151335	17.0883	1.04869	0.00460845	5.87609	0.145522	6.10163	8.88672	4.09126	0.112218	0.808986
2000	1391	99.9958	55.6846	0.151335	17.0883	1.04882	0.00460845	5.87597	0.145522	6.10163	8.88672	4.09126	0.112218	0.808986
2000	1390	99.9958	55.6846	0.151335	17.0883	1.04895	0.00460845	5.87585	0.145522	6.10163	8.88672	4.09126	0.112218	0.808986
2000	1389	99.9958	55.6846	0.151335	17.0883	1.04908	0.00460845	5.87573	0.145522	6.10163	8.88672	4.09126	0.112218	0.808986
2000	1388	99.9958	55.6846	0.151335	17.0883	1.04922	0.00460845	5.8756	0.145522	6.10163	8.88672	4.09126	0.112218	0.808986
2000	1387	99.9958	55.6846	0.151335	17.0883	1.04936	0.00460845	5.87548	0.145522	6.10162	8.88672	4.09126	0.112218	0.808986
2000	1386	99.9958	55.6846	0.151335	17.0883	1.04949	0.00460845	5.87535	0.145522	6.10162	8.88672	4.09125	0.112218	0.808985
2000	1385	99.9958	55.6846	0.151335	17.0883	1.04963	0.00460845	5.87523	0.145522	6.10162	8.88671	4.09125	0.112218	0.808985
2000	1384	99.9958	55.6846	0.151335	17.0883	1.04977	0.00460844	5.8751	0.145522	6.10162	8.88671	4.09125	0.112218	0.808985
2000	1383	99.9959	55.6845	0.151335	17.0883	1.04991	0.00460844	5.87497	0.145522	6.10162	8.88671	4.09125	0.112218	0.808985
2000	1382	99.9959	55.6845	0.151335	17.0883	1.05006	0.00460844	5.87484	0.145522	6.10162	8.88671	4.09125	0.112218	0.808985
2000	1381	99.9959	55.6845	0.151335	17.0883	1.0502	0.00460844	5.87471	0.145522	6.10162	8.88671	4.09125	0.112218	0.808985
2000	1380	99.9959	55.6845	0.151335	17.0883	1.05035	0.00460844	5.87458	0.145522	6.10162	8.88671	4.09125	0.112218	0.808985
2000	1379	99.9959	55.6845	0.151335	17.0883	1.05049	0.00460844	5.87445	0.145522	6.10162	8.88671	4.09125	0.112218	0.808985
2000	1378	99.9959	55.6845	0.151335	17.0883	1.05064	0.00460844	5.87431	0.145522	6.10162	8.88671	4.09125	0.112218	0.808984
2000	1377	99.9959	55.6845	0.151335	17.0883	1.05079	0.00460844	5.87418	0.145522	6.10162	8.8867	4.09125	0.112218	0.808984
2000	1376	99.996	55.6845	0.151335	17.0883	1.05094	0.00460844	5.87404	0.145522	6.10161	8.8867	4.09125	0.112218	0.808984
2000	1375	99.996	55.6845	0.151335	17.0883	1.05109	0.00460844	5.8739	0.145522	6.10161	8.8867	4.09125	0.112218	0.808984
2000	1374	99.996	55.6845	0.151335	17.0883	1.05125	0.00460844	5.87377	0.145522	6.10161	8.8867	4.09125	0.112218	0.808984
2000	1373	99.996	55.6845	0.151335	17.0883	1.0514	0.00460844	5.87363	0.145522	6.10161	8.8867	4.09125	0.112218	0.808984
2000	1372	99.996	55.6845	0.151335	17.0883	1.05156	0.00460844	5.87348	0.145522	6.10161	8.8867	4.09125	0.112218	0.808984
2000	1371	99.996	55.6844	0.151335	17.0883	1.05171	0.00460844	5.87334	0.145522	6.10161	8.8867	4.09125	0.112218	0.808984
2000	1370	99.9961	55.6844	0.151335	17.0883	1.05187	0.00460844	5.8732	0.145522	6.10161	8.88669	4.09125	0.112218	0.808983
2000	1369	99.9961	55.6844	0.151335	17.0883	1.05203	0.00460843	5.87305	0.145522	6.10161	8.88669	4.09124	0.112218	0.808983
2000	1368	99.9961	55.6844	0.151335	17.0883	1.05219	0.00460843	5.87291	0.145522	6.10161	8.88669	4.09124	0.112218	0.808983
2000	1367	99.9961	55.6844	0.151335	17.0883	1.05236	0.00460843	5.87276	0.145522	6.10161	8.88669	4.09124	0.112218	0.808983
2000	1366	99.9961	55.6844	0.151335	17.0883	1.05252	0.00460843	5.87261	0.145522	6.10161	8.88669	4.09124	0.112218	0.808983
2000	1365	99.9961	55.6844	0.151335	17.0883	1.05268	0.00460843	5.87246	0.145522	6.1016	8.88669	4.09124	0.112218	0.808983
2000	1364	99.9962	55.6844	0.151335	17.0883	1.05285	0.00460843	5.87231	0.145522	6.1016	8.88669	4.09124	0.112218	0.808983
2000	1363	99.9962	55.6844	0.151335	17.0883	1.05302	0.00460843	5.87216	0.145522	6.1016	8.88668	4.09124	0.112218	0.808983
2000	1362	99.9962	55.6844	0.151335	17.0883	1.05319	0.00460843	5.872	0.145522	6.1016	8.88668	4.09124	0.112218	0.808982
2000	1361	99.9962	55.6844	0.151334	17.0883	1.05336	0.00460843	5.87185	0.145522	6.1016	8.88668	4.09124	0.112218	0.808982
2000	1360	99.9962	55.6843	0.151334	17.0882	1.05353	0.00460843	5.87169	0.145522	6.1016	8.88668	4.09124	0.112218	0.808982
2000	1359	99.9962	55.6843	0.151334	17.0882	1.0537	0.00460843	5.87154	0.145522	6.1016	8.88668	4.09124	0.112218	0.808982
2000	1358	99.9963	55.6843	0.151334	17.0882	1.05388	0.00460843	5.87138	0.145522	6.1016	8.88668	4.09124	0.112218	0.808982
2000	1357	99.9963	55.6843	0.151334	17.0882	1.05406	0.00460843	5.87122	0.145522	6.1016	8.88667	4.09124	0.112218	0.808982
2000	1356	99.9963	55.6843	0.151334	17.0882	1.05423	0.00460842	5.87106	0.145522	6.10159	8.88667	4.09124	0.112218	0.808982
2000	1355	99.9963	55.6843	0.151334	17.0882	1.05441	0.00460842	5.87089	0.145522	6.10159	8.88667	4.09123	0.112217	0.808981
2000	1354	99.9963	55.6843	0.151334	17.0882	1.05459	0.00460842	5.87073	0.145522	6.10159	8.88667	4.09123	0.112217	0.808981
2000	1353	99.9964	55.6843	0.151334	17.0882	1.05478	0.00460842	5.87057	0.145522	6.10159	8.88667	4.09123	0.112217	0.808981
2000	1352	99.9964	55.6843	0.151334	17.0882	1.05496	0.00460842	5.8704	0.145521	6.10159	8.88667	4.09123	0.112217	0.808981
2000	1351	99.9964	55.6843	0.151334	17.0882	1.05514	0.00460842	5.87023	0.145521	6.10159	8.88666	4.09123	0.112217	0.808981
2000	1350	99.9964	55.6842	0.151334	17.0882	1.05533	0.00460842	5.87006	0.145521	6.10159	8.88666	4.09123	0.112217	0.808981
2000	1349	99.9964	55.6842	0.151334	17.0882	1.05552	0.00460842	5.86989	0.145521	6.10159	8.88666	4.09123	0.112217	0.808981
2000	1348	99.9964	55.6842	0.151334	17.0882	1.05571	0.00460842	5.86972	0.145521	6.10159	8.88666	4.09123	0.112217	0.80898
2000	1347	99.9965	55.6842	0.151334	17.0882	1.0559	0.00460842	5.86955	0.145521	6.10158	8.88666	4.09123	0.112217	0.80898
2000	1346	99.9965	55.6842	0.151334	17.0882	1.05609	0.00460842	5.86938	0.145521	6.10158	8.88666	4.09123	0.112217	0.80898
2000	1345	99.9965	55.6842	0.151334	17.0882	1.05628	0.00460841	5.8692	0.145521	6.10158	8.88665	4.09123	0.112217	0.80898
2000	1344	99.9965	55.6842	0.151334	17.0882	1.05648	0.00460841	5.86902	0.145521	6.10158	8.88665	4.09123	0.112217	0.80898
2000	1343	99.9965	55.6842	0.151334	17.0882	1.05667	0.00460841	5.86885	0.145521	6.10158	8.88665	4.09123	0.112217	0.80898
2000	1342	99.9966	55.6842	0.151334	17.0882	1.05687	0.00460841	5.86867	0.145521	6.10158	8.88665	4.09122	0.112217	0.808979
2000	1341	99.9966	55.6841	0.151334	17.0882	1.05707	0.00460841	5.86849	0.145521	6.10158	8.88665	4.09122	0.112217	0.808979
2000	1340	99.9966	55.6841	0.151334	17.0882	1.05727	0.00460841	5.86831	0.145521	6.10158	8.88665	4.09122	0.112217	0.808979
2000	1339	99.9966	55.6841	0.151334	17.0882	1.05747	0.00460841	5.86812	0.145521	6.10157	8.88664	4.09122	0.112217	0.808979
2000	1338	99.9966	55.6841	0.151334	17.0882	1.05767	0.00460841	5.86794	0.145521	6.10157	8.88664	4.09122	0.112217	0.808979
2000	1337	99.9967	55.6841	0.151334	17.0882	1.05788	0.00460841	5.86775	0.145521	6.10157	8.88664	4.09122	0.112217	0.808979
2000	1336	99.9967	55.6841	0.151334	17.0882	1.05808	0.00460841	5.86757	0.145521	6.10157	8.88664	4.09122	0.112217	0.808978
2000	1335	99.9967	55.6841	0.151334	17.0882	1.05829	0.00460841	5.86738	0.145521	6.10157	8.88664	4.09122	0.112217	0.808978
2000	1334	99.9967	55.6841	0.151334	17.0882	1.0585	0.0046084	5.86719	0.145521	6.10157	8.88664	4.09122	0.112217	0.808978
2000	1333	99.9967	55.6841	0.151334	17.0882	1.05871	0.0046084	5.867	0.145521	6.10157	8.88663	4.09122	0.112217	0.808978
2000	1332	99.9968	55.684	0.151334	17.0882	1.05892	0.0046084	5.8668	0.145521	6.10157	8.88663	4.09122	0.112217	0.808978
2000	1331	99.9968	55.684	0.151334	17.0882	1.05914	0.0046084	5.86661	0.145521	6.10156	8.88663	4.09122	0.112217	0.808978
2000	1330	99.9968	55.684	0.151334	17.0881	1.05935	0.0046084	5.86642	0.145521	6.10156	8.88663	4.09121	0.112217	0.808977
2000	1329	99.9968	55.684	0.151334	17.0881	1.05957	0.0046084	5.86622	0.145521	6.10156	8.88663	4.09121	0.112217	0.808977
2000	1328	99.9969	55.684	0.151334	17.0881	1.05979	0.0046084	5.86602	0.145521	6.10156	8.88662	4.09121	0.112217	0.808977
2000	1327	99.9969	55.684	0.151333	17.0881	1.06001	0.0046084	5.86582	0.145521	6.10156	8.88662	4.09121	0.112217	0.808977
2000	1326	99.9969	55.684	0.151333	17.0881	1.06023	0.0046084	5.86562	0.145521	6.10156	8.88662	4.09121	0.112217	0.808977
2000	1325	99.9969	55.684	0.151333	17.0881	1.06045	0.0046084	5.86542	0.145521	6.10156	8.88662	4.09121	0.112217	0.808976
2000	1324	99.9969	55.6839	0.151333	17.0881	1.06068	0.00460839	5.86522	0.145521	6.10156	8.88662	4.09121	0.112217	0.808976
2000	1323	99.997	55.6839	0.151333	17.0881	1.0609	0.00460839	5.86501	0.145521	6.10155	8.88661	4.09121	0.112217	0.808976
2000	1322	99.997	55.6839	0.151333	17.0881	1.06113	0.00460839	5.86481	0.145521	6.10155	8.88661	4.09121	0.112217	0.808976
2000	1321	99.997	55.6839	0.151333	17.0881	1.06136	0.00460839	5.8646	0.145521	6.10155	8.88661	4.09121	0.112217	0.808976
2000	1320	99.997	55.6839	0.151333	17.0881	1.06159	0.00460839	5.86439	0.145521	6.10155	8.88661	4.09121	0.112217	0.808976
2000	1319	99.9971	55.6839	0.151333	17.0881	1.06182	0.00460839	5.86418	0.14552	6.10155	8.88661	4.0912	0.112217	0.808975
2000	1318	99.9971	55.6839	0.151333	17.0881	1.06205	0.00460839	5.86397	0.14552	6.10155	8.8866	4.0912	0.112217	0.808975
2000	1317	99.9971	55.6839	0.151333	17.0881	1.06229	0.00460839	5.86375	0.14552	6.10155	8.8866	4.0912	0.112217	0.808975
2000	1316	99.9971	55.6838	0.151333	17.0881	1.06252	0.00460839	5.86354	0.14552	6.10154	8.8866	4.0912	0.112217	0.808975
2000	1315	99.9972	55.6838	0.151333	17.0881	1.06276	0.00460838	5.86332	0.14552	6.10154	8.8866	4.0912	0.112217	0.808975
2000	1314	99.9972	55.6838	0.151333	17.0881	1.063	0.00460838	5.86311	0.14552	6.10154	8.88659	4.0912	0.112217	0.808974
2000	1313	99.9972	55.6838	0.151333	17.0881	1.06324	0.00460838	5.86289	0.14552	6.10154	8.88659	4.0912	0.112217	0.808974
2000	1312	99.9972	55.6838	0.151333	17.0881	1.06349	0.00460838	5.86267	0.14552	6.10154	8.88659	4.0912	0.112216	0.808974
2000	1311	99.9972	55.6838	0.151333	17.0881	1.06373	0.00460838	5.86245	0.14552	6.10154	8.88659	4.0912	0.112216	0.808974
2000	1310	99.9973	55.6838	0.151333	17.0881	1.06398	0.00460838	5.86222	0.14552	6.10154	8.88659	4.0912	0.112216	0.808974
2000	1309	99.9973	55.6837	0.151333	17.0881	1.06422	0.00460838	5.862	0.14552	6.10153	8.88658	4.09119	0.112216	0.808973
2000	1308	99.9973	55.6837	0.151333	17.0881	1.06447	0.00460838	5.86177	0.14552	6.10153	8.88658	4.09119	0.112216	0.808973
2000	1307	99.9973	55.6837	0.151333	17.0881	1.06472	0.00460838	5.86155	0.14552	6.10153	8.88658	4.09119	0.112216	0.808973
2000	1306	99.9974	55.6837	0.151333	17.0881	1.06498	0.00460837	5.86132	0.14552	6.10153	8.88658	4.09119	0.112216	0.808973
2000	1305	99.9974	55.6837	0.151333	17.088	1.06523	0.00460837	5.86109	0.14552	6.10153	8.88658	4.09119	0.112216	0.808973
2000	1304	99.9974	55.6837	0.151333	17.088	1.06549	0.00460837	5.86086	0.14552	6.10153	8.88657	4.09119	0.112216	0.808972
2000	1303	99.9975	55.6837	0.151333	17.088	1.06574	0.00460837	5.86062	0.14552	6.10152	8.88657	4.09119	0.112216	0.808972
2000	1302	99.9975	55.6836	0.151333	17.088	1.066	0.00460837	5.86039	0.14552	6.10152	8.88657	4.09119	0.112216	0.808972
2000	1301	99.9975	55.6836	0.151333	17.088	1.06626	0.00460837	5.86015	0.14552	6.10152	8.88657	4.09119	0.112216	0.808972
2000	1300	99.9975	55.6836	0.151332	17.088	1.06652	0.00460837	5.85991	0.14552	6.10152	8.88656	4.09119	0.112216	0.808972
2000	1299	99.9976	55.6836	0.151332	17.088	1.06679	0.00460837	5.85968	0.14552	6.10152	8.88656	4.09118	0.112216	0.808971
2000	1298	99.9976	55.6836	0.151332	17.088	1.06705	0.00460837	5.85943	0.14552	6.10152	8.88656	4.09118	0.112216	0.808971
2000	1297	99.9976	55.6836	0.151332	17.088	1.06732	0.00460836	5.85919	0.14552	6.10151	8.88656	4.09118	0.112216	0.808971
2000	1296	99.9976	55.6836	0.151332	17.088	1.06759	0.00460836	5.85895	0.14552	6.10151	8.88655	4.09118	0.112216	0.808971
2000	1295	99.9977	55.6835	0.151332	17.088	1.06786	0.00460836	5.8587	0.14552	6.10151	8.88655	4.09118	0.112216	0.80897
2000	1294	99.9977	55.6835	0.151332	17.088	1.06813	0.00460836	5.85846	0.14552	6.10151	8.88655	4.09118	0.112216	0.80897
2000	1293	99.9977	55.6835	0.151332	17.088	1.0684	0.00460836	5.85821	0.14552	6.10151	8.88655	4.09118	0.112216	0.80897
2000	1292	99.9977	55.6835	0.151332	17.088	1.06868	0.00460836	5.85796	0.145519	6.10151	8.88654	4.09118	0.112216	0.80897
2000	1291	99.9978	55.6835	0.151332	17.088	1.06896	0.00460836	5.85771	0.145519	6.1015	8.88654	4.09118	0.112216	0.80897
2000	1290	99.9978	55.6835	0.151332	17.088	1.06923	0.00460836	5.85746	0.145519	6.1015	8.88654	4.09117	0.112216	0.808969
2000	1289	99.9978	55.6835	0.151332	17.088	1.06951	0.00460835	5.8572	0.145519	6.1015	8.88654	4.09117	0.112216	0.808969
2000	1288	99.9979	55.6834	0.151332	17.088	1.0698	0.00460835	5.85695	0.145519	6.1015	8.88653	4.09117	0.112216	0.808969
2000	1287	99.9979	55.6834	0.151332	17.088	1.07008	0.00460835	5.85669	0.145519	6.1015	8.88653	4.09117	0.112216	0.808969
2000	1286	99.9979	55.6834	0.151332	17.088	1.07037	0.00460835	5.85643	0.145519	6.1015	8.88653	4.09117	0.112216	0.808968
2000	1285	99.9979	55.6834	0.151332	17.088	1.07065	0.00460835	5.85617	0.145519	6.10149	8.88653	4.09117	0.112216	0.808968
2000	1284	99.998	55.6834	0.151332	17.088	1.07094	0.00460835	5.85591	0.145519	6.10149	8.88652	4.09117	0.112216	0.808968
2000	1283	99.998	55.6834	0.151332	17.0879	1.07123	0.00460835	5.85565	0.145519	6.10149	8.88652	4.09117	0.112216	0.808968
2000	1282	99.998	55.6833	0.151332	17.0879	1.07152	0.00460834	5.85538	0.145519	6.10149	8.88652	4.09116	0.112216	0.808968
2000	1281	99.9981	55.6833	0.151332	17.0879	1.07182	0.00460834	5.85511	0.145519	6.10149	8.88652	4.09116	0.112216	0.808967
2000	1280	99.9981	55.6833	0.151332	17.0879	1.07211	0.00460834	5.85485	0.145519	6.10149	8.88651	4.09116	0.112216	0.808967
2000	1279	99.9981	55.6833	0.151332	17.0879	1.07241	0.00460834	5.85458	0.145519	6.10148	8.88651	4.09116	0.112215	0.808967
2000	1278	99.9981	55.6833	0.151332	17.0879	1.07271	0.00460834	5.85431	0.145519	6.10148	8.88651	4.09116	0.112215	0.808967
2000	1277	99.9982	55.6833	0.151332	17.0879	1.07301	0.00460834	5.85403	0.145519	6.10148	8.88651	4.09116	0.112215	0.808966
2000	1276	99.9982	55.6832	0.151331	17.0879	1.07331	0.00460834	5.85376	0.145519	6.10148	8.8865	4.09116	0.112215	0.808966
2000	1275	99.9982	55.6832	0.151331	17.0879	1.07362	0.00460833	5.85348	0.145519	6.10148	8.8865	4.09116	0.112215	0.808966
2000	1274	99.9983	55.6832	0.151331	17.0879	1.07392	0.00460833	5.85321	0.145519	6.10147	8.8865	4.09115	0.112215	0.808966
2000	1273	99.9983	55.6832	0.151331	17.0879	1.07423	0.00460833	5.85293	0.145519	6.10147	8.88649	4.09115	0.112215	0.808965
2000	1272	99.9983	55.6832	0.151331	17.0879	1.07454	0.00460833	5.85265	0.145519	6.10147	8.88649	4.09115	0.112215	0.808965
2000	1271	99.9984	55.6832	0.151331	17.0879	1.07485	0.00460833	5.85236	0.145519	6.10147	8.88649	4.09115	0.112215	0.808965
2000	1270	99.9984	55.6831	0.151331	17.0879	1.07517	0.00460833	5.85208	0.145519	6.10147	8.88649	4.09115	0.112215	0.808965
2000	1269	99.9984	55.6831	0.151331	17.0879	1.07548	0.00460833	5.85179	0.145518	6.10146	8.88648	4.09115	0.112215	0.808964
2000	1268	99.9985	55.6831	0.151331	17.0879	1.0758	0.00460832	5.85151	0.145518	6.10146	8.88648	4.09115	0.112215	0.808964
2000	1267	99.9985	55.6831	0.151331	17.0879	1.07612	0.00460832	5.85122	0.145518	6.10146	8.88648	4.09115	0.112215	0.808964
2000	1266	99.9985	55.6831	0.151331	17.0879	1.07644	0.00460832	5.85093	0.145518	6.10146	8.88648	4.09114	0.112215	0.808964
2000	1265	99.9986	55.683	0.151331	17.0879	1.07676	0.00460832	5.85064	0.145518	6.10146	8.88647	4.09114	0.112215	0.808963
2000	1264	99.9986	55.683	0.151331	17.0878	1.07708	0.00460832	5.85034	0.145518	6.10145	8.88647	4.09114	0.112215	0.808963
2000	1263	99.9986	55.683	0.151331	17.0878	1.07741	0.00460832	5.85005	0.145518	6.10145	8.88647	4.09114	0.112215	0.808963
2000	1262	99.9987	55.683	0.151331	17.0878	1.07774	0.00460832	5.84975	0.145518	6.10145	8.88646	4.09114	0.112215	0.808962
2000	1261	99.9987	55.683	0.151331	17.0878	1.07806	0.00460831	5.84945	0.145518	6.10145	8.88646	4.09114	0.112215	0.808962
2000	1260	99.9987	55.683	0.151331	17.0878	1.0784	0.00460831	5.84915	0.145518	6.10145	8.88646	4.09114	0.112215	0.808962
2000	1259	99.9988	55.6829	0.151331	17.0878	1.07873	0.00460831	5.84885	0.145518	6.10144	8.88645	4.09113	0.112215	0.808962
2000	1258	99.9988	55.6829	0.151331	17.0878	1.07906	0.00460831	5.84854	0.145518	6.10144	8.88645	4.09113	0.112215	0.808961
2000	1257	99.9988	55.6829	0.151331	17.0878	1.0794	0.00460831	5.84824	0.145518	6.10144	8.88645	4.09113	0.112215	0.808961
2000	1256	99.9989	55.6829	0.15133	17.0878	1.07974	0.00460831	5.84793	0.145518	6.10144	8.88645	4.09113	0.112215	0.808961
2000	1255	99.9989	55.6829	0.15133	17.0878	1.08008	0.0046083	5.84762	0.145518	6.10144	8.88644	4.09113	0.112215	0.808961
2000	1254	99.9989	55.6828	0.15133	17.0878	1.08042	0.0046083	5.84731	0.145518	6.10143	8.88644	4.09113	0.112215	0.80896
2000	1253	99.999	55.6828	0.15133	17.0878	1.08077	0.0046083	5.847	0.145518	6.10143	8.88644	4.09113	0.112215	0.80896
2000	1252	99.999	55.6828	0.15133	17.0878	1.08111	0.0046083	5.84669	0.145518	6.10143	8.88643	4.09113	0.112214	0.80896
2000	1251	99.999	55.6828	0.15133	17.0878	1.08146	0.0046083	5.84637	0.145518	6.10143	8.88643	4.09112	0.112214	0.808959
2000	1250	99.9991	55.6828	0.15133	17.0878	1.08181	0.0046083	5.84605	0.145518	6.10143	8.88643	4.09112	0.112214	0.808959
2000	1249	99.9991	55.6827	0.15133	17.0878	1.08216	0.0046083	5.84574	0.145518	6.10142	8.88642	4.09112	0.112214	0.808959
2000	1248	99.9991	55.6827	0.15133	17.0878	1.08252	0.00460829	5.84541	0.145517	6.10142	8.88642	4.09112	0.112214	0.808959
2000	1247	99.9992	55.6827	0.15133	17.0877	1.08287	0.00460829	5.84509	0.145517	6.10142	8.88642	4.09112	0.112214	0.808958
2000	1246	99.9992	55.6827	0.15133	17.0877	1.08323	0.00460829	5.84477	0.145517	6.10142	8.88641	4.09112	0.112214	0.808958
2000	1245	99.9992	55.6827	0.15133	17.0877	1.08359	0.00460829	5.84444	0.145517	6.10142	8.88641	4.09111	0.112214	0.808958
2000	1244	99.9993	55.6826	0.15133	17.0877	1.08395	0.00460829	5.84411	0.145517	6.10141	8.88641	4.09111	0.112214	0.808957
2000	1243	99.9993	55.6826	0.15133	17.0877	1.08431	0.00460829	5.84379	0.145517	6.10141	8.8864	4.09111	0.112214	0.808957
2000	1242	99.9993	55.6826	0.15133	17.0877	1.08468	0.00460828	5.84345	0.145517	6.10141	8.8864	4.09111	0.112214	0.808957
2000	1241	99.9994	55.6826	0.15133	17.0877	1.08505	0.00460828	5.84312	0.145517	6.10141	8.8864	4.09111	0.112214	0.808957
2000	1240	99.9994	55.6826	0.15133	17.0877	1.08541	0.00460828	5.84279	0.145517	6.1014	8.8864	4.09111	0.112214	0.808956
2000	1239	99.9995	55.6825	0.15133	17.0877	1.08579	0.00460828	5.84245	0.145517	6.1014	8.88639	4.09111	0.112214	0.808956
2000	1238	99.9995	55.6825	0.15133	17.0877	1.08616	0.00460828	5.84211	0.145517	6.1014	8.88639	4.0911	0.112214	0.808956
2000	1237	99.9995	55.6825	0.151329	17.0877	1.08653	0.00460828	5.84177	0.145517	6.1014	8.88639	4.0911	0.112214	0.808955
2000	1236	99.9996	55.6825	0.151329	17.0877	1.08691	0.00460827	5.84143	0.145517	6.10139	8.88638	4.0911	0.112214	0.808955
2000	1235	99.9996	55.6825	0.151329	17.0877	1.08729	0.00460827	5.84109	0.145517	6.10139	8.88638	4.0911	0.112214	0.808955
2000	1234	99.9996	55.6824	0.151329	17.0877	1.08767	0.00460827	5.84074	0.145517	6.10139	8.88638	4.0911	0.112214	0.808954
2000	1233	99.9997	55.6824	0.151329	17.0877	1.08805	0.00460827	5.84039	0.145517	6.10139	8.88637	4.0911	0.112214	0.808954
2000	1232	99.9997	55.6824	0.151329	17.0877	1.08844	0.00460827	5.84004	0.145517	6.10139	8.88637	4.0911	0.112214	0.808954
2000	1231	99.9998	55.6824	0.151329	17.0876	1.08883	0.00460826	5.83969	0.145517	6.10138	8.88636	4.09109	0.112214	0.808953
2000	1230	99.9998	55.6824	0.151329	17.0876	1.08922	0.00460826	5.83934	0.145516	6.10138	8.88636	4.09109	0.112214	0.808953
2000	1229	99.9998	55.6823	0.151329	17.0876	1.08961	0.00460826	5.83899	0.145516	6.10138	8.88636	4.09109	0.112214	0.808953
2000	1228	99.9999	55.6823	0.151329	17.0876	1.09	0.00460826	5.83863	0.145516	6.10138	8.88635	4.09109	0.112213	0.808953
2000	1227	99.9999	55.6823	0.151329	17.0876	1.09039	0.00460826	5.83827	0.145516	6.10137	8.88635	4.09109	0.112213	0.808952
2000	1226	100	55.6823	0.151329	17.0876	1.09079	0.00460826	5.83791	0.145516	6.10137	8.88635	4.09109	0.112213	0.808952
2000	1225	100	55.6822	0.151329	17.0876	1.09119	0.00460825	5.83755	0.145516	6.10137	8.88634	4.09108	0.112213	0.808952
2000	1224	100	55.6822	0.151329	17.0876	1.09159	0.00460825	5.83719	0.145516	6.10137	8.88634	4.09108	0.112213	0.808951
2000	1223	100	55.6822	0.151329	17.0876	1.092	0.00460825	5.83682	0.145516	6.10136	8.88634	4.09108	0.112213	0.808951
2000	1222	100	55.6822	0.151329	17.0876	1.0924	0.00460825	5.83645	0.145516	6.10136	8.88633	4.09108	0.112213	0.808951
2000	1221	100	55.6822	0.151328	17.0876	1.09281	0.00460825	5.83608	0.145516	6.10136	8.88633	4.09108	0.112213	0.80895
2000	1220	100	55.6821	0.151328	17.0876	1.09322	0.00460824	5.83571	0.145516	6.10136	8.88633	4.09108	0.112213	0.80895
2000	1219	100	55.6821	0.151328	17.0876	1.09363	0.00460824	5.83534	0.145516	6.10135	8.88632	4.09107	0.112213	0.80895
2000	1218	100	55.6821	0.151328	17.0876	1.09404	0.00460824	5.83496	0.145516	6.10135	8.88632	4.09107	0.112213	0.808949
2000	1217	100	55.6821	0.151328	17.0875	1.09446	0.00460824	5.83459	0.145516	6.10135	8.88631	4.09107	0.112213	0.808949
2000	1216	100	55.682	0.151328	17.0875	1.09488	0.00460824	5.83421	0.145516	6.10135	8.88631	4.09107	0.112213	0.808949
2000	1215	100	55.682	0.151328	17.0875	1.0953	0.00460823	5.83383	0.145516	6.10134	8.88631	4.09107	0.112213	0.808948
2000	1214	100	55.682	0.151328	17.0875	1.09572	0.00460823	5.83344	0.145516	6.10134	8.8863	4.09107	0.112213	0.808948
2000	1213	100	55.682	0.151328	17.0875	1.09614	0.00460823	5.83306	0.145515	6.10134	8.8863	4.09106	0.112213	0.808948
2000	1212	100.001	55.6819	0.151328	17.0875	1.09657	0.00460823	5.83267	0.145515	6.10134	8.8863	4.09106	0.112213	0.808947
2000	1211	100.001	55.6819	0.151328	17.0875	1.097	0.00460823	5.83228	0.145515	6.10133	8.88629	4.09106	0.112213	0.808947
2000	1210	100.001	55.6819	0.151328	17.0875	1.09743	0.00460822	5.83189	0.145515	6.10133	8.88629	4.09106	0.112213	0.808946
2000	1209	100.001	55.6819	0.151328	17.0875	1.09786	0.00460822	5.8315	0.145515	6.10133	8.88628	4.09106	0.112213	0.808946
2000	1208	100.001	55.6818	0.151328	17.0875	1.0983	0.00460822	5.83111	0.145515	6.10133	8.88628	4.09105	0.112213	0.808946
2000	1207	100.001	55.6818	0.151328	17.0875	1.09873	0.00460822	5.83071	0.145515	6.10132	8.88628	4.09105	0.112213	0.808945
2000	1206	100.001	55.6818	0.151328	17.0875	1.09917	0.00460822	5.83031	0.145515	6.10132	8.88627	4.09105	0.112212	0.808945
2000	1205	100.001	55.6818	0.151327	17.0875	1.09962	0.00460821	5.82991	0.145515	6.10132	8.88627	4.09105	0.112212	0.808945
2000	1204	100.001	55.6817	0.151327	17.0875	1.10006	0.00460821	5.82951	0.145515	6.10131	8.88626	4.09105	0.112212	0.808944
2000	1203	100.001	55.6817	0.151327	17.0874	1.10051	0.00460821	5.8291	0.145515	6.10131	8.88626	4.09105	0.112212	0.808944
2000	1202	100.001	55.6817	0.151327	17.0874	1.10095	0.00460821	5.8287	0.145515	6.10131	8.88626	4.09104	0.112212	0.808944
2000	1201	100.001	55.6817	0.151327	17.0874	1.1014	0.00460821	5.82829	0.145515	6.10131	8.88625	4.09104	0.112212	0.808943
2000	1200	100.001	55.6816	0.151327	17.0874	1.10186	0.0046082	5.82788	0.145515	6.1013	8.88625	4.09104	0.112212	0.808943
2000	1199	100.001	55.6816	0.151327	17.0874	1.10231	0.0046082	5.82747	0.145515	6.1013	8.88624	4.09104	0.112212	0.808943
2000	1198	100.001	55.6816	0.151327	17.0874	1.10277	0.0046082	5.82705	0.145515	6.1013	8.88624	4.09104	0.112212	0.808942
2000	1197	100.001	55.6816	0.151327	17.0874	1.10323	0.0046082	5.82664	0.145514	6.10129	8.88624	4.09103	0.112212	0.808942
2000	1196	100.001	55.6815	0.151327	17.0874	1.10369	0.0046082	5.82622	0.145514	6.10129	8.88623	4.09103	0.112212	0.808941
2000	1195	100.001	55.6815	0.151327	17.0874	1.10415	0.00460819	5.8258	0.145514	6.10129	8.88623	4.09103	0.112212	0.808941
2000	1194	100.001	55.6815	0.151327	17.0874	1.10462	0.00460819	5.82537	0.145514	6.10129	8.88622	4.09103	0.112212	0.808941
2000	1193	100.001	55.6815	0.151327	17.0874	1.10509	0.00460819	5.82495	0.145514	6.10128	8.88622	4.09103	0.112212	0.80894
2000	1192	100.001	55.6814	0.151327	17.0874	1.10556	0.00460819	5.82452	0.145514	6.10128	8.88622	4.09102	0.112212	0.80894
2000	1191	100.001	55.6814	0.151326	17.0873	1.10603	0.00460818	5.82409	0.145514	6.10128	8.88621	4.09102	0.112212	0.80894
2000	1190	100.002	55.6814	0.151326	17.0873	1.10651	0.00460818	5.82366	0.145514	6.10127	8.88621	4.09102	0.112212	0.808939
2000	1189	100.002	55.6814	0.151326	17.0873	1.10698	0.00460818	5.82323	0.145514	6.10127	8.8862	4.09102	0.112212	0.808939
2000	1188	100.002	55.6813	0.151326	17.0873	1.10746	0.00460818	5.8228	0.145514	6.10127	8.8862	4.09102	0.112212	0.808938
2000	1187	100.002	55.6813	0.151326	17.0873	1.10795	0.00460818	5.82236	0.145514	6.10127	8.88619	4.09102	0.112211	0.808938
2000	1186	100.002	55.6813	0.151326	17.0873	1.10843	0.00460817	5.82192	0.145514	6.10126	8.88619	4.09101	0.112211	0.808938
2000	1185	100.002	55.6813	0.151326	17.0873	1.10892	0.00460817	5.82148	0.145514	6.10126	8.88619	4.09101	0.112211	0.808937
2000	1184	100.002	55.6812	0.151326	17.0873	1.10941	0.00460817	5.82103	0.145514	6.10126	8.88618	4.09101	0.112211	0.808937
2000	1183	100.002	55.6812	0.151326	17.0873	1.1099	0.00460817	5.82059	0.145513	6.10125	8.88618	4.09101	0.112211	0.808936
2000	1182	99.7791	55.6824	0.151631	17.1202	1.10987	0.00461846	5.81254	0.145838	6.04822	8.90137	4.10009	0.112462	0.810742
2000	1181	99.6499	55.6832	0.151809	17.1393	1.11005	0.00462444	5.80763	0.146027	6.01741	8.91019	4.10537	0.112608	0.811793
2000	1180	99.5213	55.6839	0.151986	17.1584	1.11023	0.00463042	5.80269	0.146216	5.98668	8.91898	4.11064	0.112753	0.812843
2000	1179	99.3931	55.6847	0.152163	17.1775	1.1104	0.00463639	5.79772	0.146405	5.95604	8.92773	4.11591	0.112899	0.813891
2000	1178	98.2323	55.7303	0.153904	17.118	1.11816	0.00469118	5.83004	0.148135	5.91164	8.90898	4.13856	0.114124	0.823508
2000	1177	97.1699	55.7725	0.155533	17.0642	1.12535	0.00474247	5.8595	0.149754	5.86852	8.89228	4.15985	0.11527	0.832513
2000	1176	96.1304	55.8145	0.157162	17.0106	1.13252	0.00479375	5.88876	0.151374	5.82568	8.87568	4.18103	0.116415	0.841515
2000	1175	95.1131	55.8563	0.15879	16.9571	1.13968	0.00484503	5.91781	0.152993	5.78312	8.85916	4.20209	0.117559	0.850516
2000	1174	94.1172	55.898	0.160418	16.9038	1.14681	0.00489629	5.94667	0.154612	5.74084	8.84274	4.22303	0.1187	0.859515
2000	1173	93.1423	55.9394	0.162046	16.8506	1.15392	0.00494754	5.97534	0.15623	5.69882	8.8264	4.24386	0.119841	0.868512
2000	1172	92.1875	55.9807	0.163673	16.7976	1.16101	0.00499879	6.00381	0.157848	5.65708	8.81015	4.26458	0.120979	0.877507
2000	1171	91.2523	56.0219	0.1653	16.7448	1.16808	0.00505002	6.03209	0.159466	5.6156	8.79398	4.28519	0.122116	0.8865
2000	1170	90.336	56.0628	0.166926	16.6921	1.17513	0.00510124	6.06019	0.161083	5.57439	8.7779	4.30568	0.123251	0.895492
2000	1169	89.308	56.1126	0.168592	16.6813	1.1804	0.00515996	6.08883	0.162938	5.51923	8.71579	4.33477	0.124581	0.9058
2000	1168	88.3456	56.1592	0.17024	16.6568	1.18621	0.00521617	6.11704	0.164712	5.46921	8.66905	4.3608	0.125844	0.915667
2000	1167	87.4049	56.2056	0.171885	16.6321	1.192	0.0052723	6.14505	0.166485	5.41966	8.62265	4.38664	0.127103	0.925521
2000	1166	86.4852	56.2518	0.173525	16.6073	1.19776	0.00532837	6.17286	0.168256	5.37058	8.57659	4.41228	0.12836	0.935364
2000	1165	85.5857	56.2977	0.175162	16.5824	1.20349	0.00538437	6.20048	0.170024	5.32195	8.53087	4.43774	0.129614	0.945195
2000	1164	84.7058	56.3434	0.176795	16.5573	1.2092	0.00544031	6.2279	0.17179	5.27378	8.48548	4.463	0.130865	0.955014
2000	1163	83.8448	56.3889	0.178423	16.5321	1.21489	0.00549617	6.25514	0.173554	5.22606	8.44041	4.48807	0.132113	0.964821
2000	1162	83.0021	56.4342	0.180049	16.5067	1.22055	0.00555197	6.28219	0.175316	5.17879	8.39568	4.51296	0.133358	0.974616
2000	1161	82.1771	56.4792	0.18167	16.4813	1.22619	0.00560771	6.30906	0.177076	5.13195	8.35127	4.53766	0.1346	0.9844
2000	1160	81.3504	56.5267	0.183326	16.4567	1.23111	0.0056647	6.33141	0.178876	5.08568	8.30714	4.56305	0.13587	0.994404
2000	1159	80.5321	56.5744	0.185003	16.4311	1.23605	0.00572225	6.35344	0.180693	5.03896	8.26454	4.58846	0.137151	1.00451
2000	1158	79.731	56.6218	0.186677	16.4053	1.24098	0.00577975	6.37529	0.182509	4.99267	8.22223	4.61368	0.138429	1.0146
2000	1157	78.9465	56.6691	0.188347	16.3794	1.24589	0.00583718	6.39697	0.184322	4.94683	8.18022	4.63873	0.139705	1.02468
2000	1156	78.1781	56.7161	0.190013	16.3534	1.25077	0.00589456	6.41848	0.186134	4.90141	8.13849	4.66359	0.140977	1.03475
2000	1155	77.4252	56.7629	0.191676	16.3272	1.25564	0.00595188	6.43983	0.187944	4.85641	8.09706	4.68828	0.142247	1.04482
2000	1154	76.6875	56.8095	0.193336	16.3009	1.26049	0.00600913	6.46102	0.189752	4.81183	8.0559	4.7128	0.143514	1.05487
2000	1153	75.9644	56.8559	0.194992	16.2745	1.26532	0.00606633	6.48205	0.191558	4.76767	8.01504	4.73714	0.144778	1.06491
2000	1152	75.2555	56.9022	0.196645	16.248	1.27013	0.00612348	6.50292	0.193363	4.72392	7.97445	4.7613	0.14604	1.07494
2000	1151	74.5604	56.9482	0.198294	16.2214	1.27492	0.00618056	6.52364	0.195166	4.68057	7.93413	4.7853	0.147299	1.08496
2000	1150	73.8787	56.994	0.19994	16.1946	1.2797	0.00623759	6.54421	0.196966	4.63763	7.8941	4.80913	0.148555	1.09497
2000	1149	73.21	57.0396	0.201583	16.1677	1.28446	0.00629457	6.56462	0.198766	4.59508	7.85433	4.83279	0.149809	1.10497
2000	1148	72.5539	57.085	0.203222	16.1407	1.2892	0.00635149	6.58489	0.200563	4.55292	7.81484	4.85629	0.15106	1.11497
2000	1147	71.9101	57.1302	0.204859	16.1136	1.29393	0.00640836	6.60502	0.202359	4.51114	7.77561	4.87962	0.152308	1.12495
2000	1146	71.2782	57.1752	0.206492	16.0864	1.29864	0.00646517	6.625	0.204153	4.46975	7.73664	4.90278	0.153554	1.13492
2000	1145	70.6578	57.22	0.208123	16.0591	1.30334	0.00652193	6.64484	0.205945	4.42874	7.69794	4.92579	0.154797	1.14489
2000	1144	70.0488	57.2646	0.20975	16.0317	1.30802	0.00657864	6.66454	0.207736	4.38811	7.6595	4.94863	0.156037	1.15484
2000	1143	69.4506	57.309	0.211374	16.0041	1.31269	0.00663529	6.6841	0.209525	4.34784	7.62131	4.97132	0.157275	1.16479
2000	1142	68.8632	57.3532	0.212996	15.9765	1.31734	0.0066919	6.70353	0.211312	4.30794	7.58338	4.99384	0.158511	1.17472
2000	1141	68.2861	57.3973	0.214614	15.9487	1.32198	0.00674845	6.72282	0.213098	4.2684	7.5457	5.01621	0.159744	1.18465
2000	1140	67.719	57.4411	0.21623	15.9209	1.32661	0.00680496	6.74198	0.214882	4.22922	7.50828	5.03843	0.160974	1.19457
2000	1139	67.1618	57.4848	0.217843	15.8929	1.33122	0.00686142	6.76102	0.216665	4.19039	7.4711	5.06049	0.162202	1.20448
2000	1138	66.6142	57.5283	0.219453	15.8649	1.33583	0.00691783	6.77992	0.218446	4.15191	7.43416	5.0824	0.163428	1.21438
2000	1137	66.0758	57.5716	0.22106	15.8367	1.34041	0.00697419	6.7987	0.220226	4.11378	7.39748	5.10415	0.164651	1.22428
2000	1136	65.5465	57.6147	0.222665	15.8085	1.34499	0.00703051	6.81736	0.222004	4.07599	7.36103	5.12576	0.165872	1.23416
2000	1135	65.0261	57.6576	0.224267	15.7801	1.34955	0.00708678	6.83589	0.223781	4.03854	7.32482	5.14722	0.16709	1.24404
2000	1134	64.5142	57.7003	0.225866	15.7517	1.35411	0.00714301	6.8543	0.225557	4.00143	7.28885	5.16853	0.168306	1.25391
2000	1133	64.0107	57.7429	0.227463	15.7231	1.35865	0.00719919	6.87259	0.227331	3.96464	7.25312	5.18969	0.169519	1.26377
2000	1132	63.5155	57.7853	0.229058	15.6945	1.36318	0.00725533	6.89077	0.229104	3.92818	7.21761	5.21071	0.17073	1.27363
2000	1131	63.0281	57.8275	0.230649	15.6658	1.3677	0.00731142	6.90882	0.230875	3.89205	7.18234	5.23158	0.171939	1.28348
2000	1130	62.5486	57.8695	0.232239	15.637	1.37221	0.00736748	6.92677	0.232645	3.85624	7.1473	5.25231	0.173146	1.29332
2000	1129	62.0767	57.9113	0.233826	15.6081	1.37671	0.00742349	6.9446	0.234414	3.82074	7.11249	5.2729	0.17435	1.30315
2000	1128	61.6121	57.953	0.235411	15.5791	1.3812	0.00747946	6.96231	0.236181	3.78556	7.0779	5.29335	0.175552	1.31298
2000	1127	61.1548	57.9945	0.236993	15.55	1.38568	0.00753539	6.97992	0.237947	3.75068	7.04353	5.31366	0.176751	1.32279
2000	1126	60.7045	58.0358	0.238574	15.5208	1.39015	0.00759129	6.99742	0.239712	3.71612	7.00939	5.33383	0.177948	1.33261
2000	1125	60.2611	58.077	0.240152	15.4916	1.39461	0.00764714	7.01481	0.241476	3.68185	6.97546	5.35386	0.179144	1.34241
2000	1124	59.8244	58.118	0.241727	15.4623	1.39907	0.00770296	7.03209	0.243239	3.64789	6.94176	5.37376	0.180336	1.35221
2000	1123	59.3943	58.1588	0.243301	15.4329	1.40351	0.00775875	7.04926	0.245	3.61422	6.90826	5.39352	0.181527	1.362
2000	1122	58.9706	58.1994	0.244873	15.4034	1.40795	0.00781449	7.06634	0.246761	3.58085	6.87499	5.41315	0.182716	1.37179
2000	1121	58.5532	58.2399	0.246442	15.3738	1.41238	0.0078702	7.08331	0.24852	3.54777	6.84192	5.43265	0.183902	1.38157
2000	1120	58.1418	58.2802	0.24801	15.3442	1.4168	0.00792588	7.10017	0.250278	3.51498	6.80906	5.45201	0.185086	1.39134
2000	1119	57.7365	58.3203	0.249575	15.3144	1.42121	0.00798153	7.11694	0.252035	3.48247	6.77641	5.47125	0.186268	1.40111
2000	1118	57.337	58.3603	0.251139	15.2846	1.42561	0.00803714	7.13361	0.253791	3.45024	6.74397	5.49035	0.187448	1.41087
2000	1117	56.9432	58.4001	0.2527	15.2548	1.43001	0.00809272	7.15018	0.255546	3.41829	6.71174	5.50933	0.188626	1.42063
2000	1116	56.555	58.4398	0.25426	15.2248	1.4344	0.00814827	7.16665	0.2573	3.38661	6.6797	5.52817	0.189802	1.43038
2000	1115	56.1723	58.4792	0.255818	15.1948	1.43878	0.00820379	7.18302	0.259053	3.35521	6.64787	5.5469	0.190975	1.44013
2000	1114	55.7949	58.5186	0.257374	15.1647	1.44316	0.00825927	7.1993	0.260806	3.32408	6.61624	5.56549	0.192147	1.44987
2000	1113	55.4227	58.5577	0.258928	15.1345	1.44753	0.00831473	7.21549	0.262557	3.29321	6.5848	5.58396	0.193317	1.4596
2000	1112	55.0557	58.5968	0.260481	15.1043	1.45189	0.00837017	7.23158	0.264307	3.26261	6.55357	5.60231	0.194484	1.46933
2000	1111	54.6937	58.6356	0.262031	15.074	1.45625	0.00842557	7.24758	0.266057	3.23227	6.52252	5.62054	0.19565	1.47906
2000	1110	54.3365	58.6743	0.263581	15.0436	1.4606	0.00848095	7.26348	0.267806	3.20219	6.49167	5.63864	0.196813	1.48878
2000	1109	53.9842	58.7129	0.265128	15.0132	1.46495	0.0085363	7.2793	0.269553	3.17236	6.46101	5.65662	0.197975	1.4985
2000	1108	53.6365	58.7512	0.266674	14.9827	1.46929	0.00859163	7.29503	0.271301	3.14279	6.43054	5.67449	0.199135	1.50821
2000	1107	53.2935	58.7895	0.268218	14.9521	1.47362	0.00864694	7.31066	0.273047	3.11347	6.40026	5.69223	0.200292	1.51792
2000	1106	52.9549	58.8276	0.269761	14.9215	1.47795	0.00870222	7.32621	0.274793	3.0844	6.37017	5.70986	0.201448	1.52762
2000	1105	52.6208	58.8655	0.271303	14.8908	1.48227	0.00875748	7.34168	0.276537	3.05557	6.34026	5.72737	0.202602	1.53732
2000	1104	52.291	58.9033	0.272842	14.8601	1.48659	0.00881271	7.35705	0.278282	3.02698	6.31054	5.74476	0.203754	1.54702
2000	1103	51.9654	58.9409	0.274381	14.8293	1.4909	0.00886793	7.37234	0.280025	2.99864	6.28099	5.76204	0.204904	1.55671
2000	1102	51.644	58.9784	0.275918	14.7984	1.49521	0.00892312	7.38755	0.281768	2.97053	6.25163	5.77921	0.206052	1.5664
2000	1101	51.3266	59.0158	0.277453	14.7675	1.49952	0.0089783	7.40267	0.28351	2.94266	6.22245	5.79626	0.207198	1.57609
2000	1100	51.0132	59.053	0.278988	14.7365	1.50382	0.00903345	7.4177	0.285252	2.91502	6.19344	5.8132	0.208343	1.58577
2000	1099	50.7037	59.09	0.280521	14.7054	1.50811	0.00908859	7.43266	0.286993	2.88761	6.16461	5.83003	0.209486	1.59545
2000	1098	50.398	59.1269	0.282052	14.6743	1.5124	0.00914371	7.44753	0.288734	2.86043	6.13596	5.84675	0.210627	1.60512
2000	1097	50.0961	59.1637	0.283583	14.6432	1.51669	0.00919882	7.46232	0.290474	2.83348	6.10748	5.86335	0.211766	1.6148
2000	1096	49.7979	59.2003	0.285112	14.612	1.52097	0.00925391	7.47703	0.292213	2.80675	6.07917	5.87985	0.212903	1.62447
2000	1095	49.5033	59.2368	0.28664	14.5807	1.52525	0.00930898	7.49166	0.293952	2.78024	6.05103	5.89624	0.214038	1.63414
2000	1094	49.2122	59.2731	0.288167	14.5494	1.52953	0.00936404	7.50621	0.295691	2.75395	6.02307	5.91253	0.215172	1.6438
2000	1093	48.9246	59.3093	0.289693	14.518	1.5338	0.00941909	7.52067	0.297429	2.72788	5.99527	5.92871	0.216304	1.65346
2000	1092	48.6404	59.3454	0.291218	14.4866	1.53807	0.00947412	7.53507	0.299167	2.70203	5.96763	5.94478	0.217434	1.66313
2000	1091	48.3596	59.3813	0.292741	14.4551	1.54233	0.00952914	7.54938	0.300904	2.67638	5.94016	5.96075	0.218563	1.67278
2000	1090	48.082	59.4171	0.294264	14.4236	1.5466	0.00958415	7.56361	0.302642	2.65095	5.91286	5.97661	0.21969	1.68244
2000	1089	47.8077	59.4528	0.295785	14.3921	1.55086	0.00963915	7.57777	0.304378	2.62572	5.88572	5.99237	0.220815	1.6921
2000	1088	47.5365	59.4883	0.297306	14.3605	1.55511	0.00969414	7.59185	0.306115	2.60071	5.85874	6.00803	0.221939	1.70175
2000	1087	47.2684	59.5237	0.298826	14.3288	1.55936	0.00974911	7.60585	0.307851	2.57589	5.83192	6.02359	0.22306	1.7114
2000	1086	47.0034	59.559	0.300344	14.2971	1.56361	0.00980409	7.61978	0.309587	2.55128	5.80526	6.03905	0.224181	1.72105
2000	1085	46.7414	59.5941	0.301862	14.2654	1.56786	0.00985905	7.63364	0.311322	2.52687	5.77875	6.0544	0.225299	1.7307
2000	1084	46.4823	59.6291	0.303379	14.2336	1.57211	0.009914	7.64741	0.313057	2.50266	5.7524	6.06966	0.226416	1.74034
2000	1083	46.2261	59.664	0.304895	14.2017	1.57635	0.00996895	7.66112	0.314793	2.47864	5.72621	6.08482	0.227531	1.74999
2000	1082	45.9727	59.6987	0.30641	14.1699	1.58059	0.0100239	7.67475	0.316527	2.45482	5.70017	6.09989	0.228645	1.75964
2000	1081	45.7221	59.7333	0.307925	14.1379	1.58482	0.0100788	7.6883	0.318262	2.43119	5.67429	6.11485	0.229757	1.76928
2000	1080	45.4742	59.7678	0.309438	14.106	1.58906	0.0101338	7.70178	0.319997	2.40775	5.64855	6.12972	0.230868	1.77892
2000	1079	45.2291	59.8022	0.310951	14.074	1.59329	0.0101887	7.71519	0.321731	2.38451	5.62297	6.1445	0.231977	1.78856
2000	1078	44.9866	59.8364	0.312464	14.0419	1.59752	0.0102436	7.72853	0.323466	2.36145	5.59754	6.15918	0.233084	1.79821
2000	1077	44.7466	59.8705	0.313975	14.0099	1.60175	0.0102985	7.74179	0.3252	2.33857	5.57225	6.17376	0.23419	1.80785
2000	1076	44.5093	59.9045	0.315486	13.9777	1.60598	0.0103535	7.75498	0.326935	2.31588	5.54711	6.18825	0.235294	1.81749
2000	1075	44.2744	59.9384	0.316996	13.9456	1.6102	0.0104084	7.7681	0.328669	2.29337	5.52212	6.20266	0.236397	1.82713
2000	1074	44.042	59.9721	0.318506	13.9134	1.61442	0.0104633	7.78115	0.330403	2.27104	5.49727	6.21696	0.237498	1.83677
2000	1073	43.8121	60.0057	0.320015	13.8812	1.61865	0.0105182	7.79412	0.332137	2.24888	5.47256	6.23118	0.238598	1.84641
2000	1072	43.5845	60.0393	0.321523	13.8489	1.62286	0.0105732	7.80703	0.333872	2.22691	5.448	6.24531	0.239696	1.85605
2000	1071	43.3592	60.0727	0.323031	13.8166	1.62708	0.0106281	7.81986	0.335606	2.20511	5.42358	6.25935	0.240793	1.8657
2000	1070	43.1363	60.1059	0.324538	13.7843	1.6313	0.010683	7.83262	0.33734	2.18348	5.3993	6.2733	0.241889	1.87534
2000	1069	42.9156	60.1391	0.326045	13.7519	1.63551	0.0107379	7.84531	0.339075	2.16202	5.37515	6.28716	0.242982	1.88498
2000	1068	42.6972	60.1721	0.327551	13.7195	1.63972	0.0107929	7.85793	0.34081	2.14074	5.35115	6.30094	0.244075	1.89462
2000	1067	42.481	60.2051	0.329057	13.6871	1.64394	0.0108478	7.87048	0.342544	2.11962	5.32728	6.31463	0.245166	1.90427
2000	1066	42.2669	60.2379	0.330562	13.6547	1.64814	0.0109028	7.88296	0.344279	2.09867	5.30355	6.32823	0.246256	1.91391
2000	1065	42.0549	60.2706	0.332067	13.6222	1.65235	0.0109577	7.89537	0.346015	2.07789	5.27995	6.34174	0.247344	1.92356
2000	1064	41.8451	60.3032	0.333572	13.5897	1.65656	0.0110127	7.90771	0.34775	2.05727	5.25649	6.35518	0.248431	1.93321
2000	1063	41.6373	60.3357	0.335076	13.5571	1.66077	0.0110676	7.91998	0.349485	2.03681	5.23316	6.36852	0.249516	1.94285
2000	1062	41.4315	60.368	0.336579	13.5245	1.66497	0.0111226	7.93218	0.351221	2.01651	5.20997	6.38179	0.2506	1.9525
2000	1061	41.2277	60.4003	0.338083	13.4919	1.66917	0.0111776	7.94431	0.352957	1.99637	5.1869	6.39497	0.251683	1.96215
2000	1060	41.0259	60.4324	0.339586	13.4593	1.67338	0.0112325	7.95637	0.354694	1.97639	5.16396	6.40807	0.252764	1.97181
2000	1059	40.826	60.4645	0.341089	13.4266	1.67758	0.0112875	7.96837	0.35643	1.95657	5.14115	6.42109	0.253844	1.98146
2000	1058	40.628	60.4964	0.342591	13.394	1.68178	0.0113426	7.98029	0.358167	1.9369	5.11847	6.43403	0.254922	1.99112
2000	1057	40.4319	60.5283	0.344093	13.3613	1.68597	0.0113976	7.99214	0.359904	1.91738	5.09592	6.44689	0.256	2.00078
2000	1056	40.2376	60.56	0.345595	13.3285	1.69017	0.0114526	8.00392	0.361642	1.89802	5.0735	6.45967	0.257075	2.01044
2000	1055	40.0452	60.5916	0.347097	13.2958	1.69437	0.0115076	8.01563	0.36338	1.8788	5.05119	6.47237	0.25815	2.0201
2000	1054	39.8545	60.6231	0.348598	13.263	1.69856	0.0115627	8.02728	0.365119	1.85974	5.02902	6.48499	0.259223	2.02976
2000	1053	39.6656	60.6546	0.3501	13.2302	1.70276	0.0116178	8.03885	0.366857	1.84082	5.00696	6.49753	0.260295	2.03943
2000	1052	39.4784	60.6859	0.351601	13.1974	1.70695	0.0116728	8.05035	0.368597	1.82205	4.98503	6.51	0.261366	2.0491
2000	1051	39.293	60.7171	0.353102	13.1645	1.71114	0.0117279	8.06179	0.370337	1.80343	4.96322	6.52239	0.262435	2.05877
2000	1050	39.1092	60.7482	0.354602	13.1317	1.71534	0.011783	8.07315	0.372077	1.78495	4.94153	6.53471	0.263504	2.06844
2000	1049	38.9271	60.7793	0.356103	13.0988	1.71953	0.0118382	8.08444	0.373818	1.76661	4.91996	6.54695	0.264571	2.07812
2000	1048	38.7462	60.8106	0.357582	13.0659	1.72367	0.0117688	8.09538	0.375562	1.74838	4.8985	6.55917	0.265639	2.08782
2000	1047	38.5664	60.8426	0.359021	13.0331	1.72772	0.0114912	8.10576	0.377313	1.73024	4.87714	6.57141	0.266709	2.09756
2000	1046	38.3881	60.8744	0.360454	13.0002	1.73177	0.0112136	8.11602	0.379066	1.71223	4.8559	6.58358	0.267779	2.1073
2000	1045	38.2114	60.9063	0.361883	12.9674	1.73582	0.010936	8.1262	0.380818	1.69437	4.83477	6.59569	0.268848	2.11704
2000	1044	38.0363	60.938	0.363309	12.9345	1.73986	0.0106584	8.13629	0.382572	1.67664	4.81376	6.60772	0.269916	2.12679
2000	1043	37.8626	60.9697	0.364732	12.9016	1.74389	0.0103807	8.14628	0.384327	1.65905	4.79286	6.61968	0.270983	2.13654
2000	1042	37.6905	61.0013	0.366151	12.8686	1.74792	0.010103	8.15618	0.386082	1.64159	4.77208	6.63158	0.272048	2.1463
2000	1041	37.5198	61.0329	0.367566	12.8357	1.75195	0.00982519	8.16599	0.387839	1.62426	4.7514	6.64341	0.273113	2.15607
2000	1040	37.3505	61.0644	0.368976	12.8028	1.75597	0.00954739	8.17571	0.389596	1.60707	4.73084	6.65517	0.274177	2.16584
2000	1039	37.1827	61.0958	0.370382	12.7698	1.75998	0.00926957	8.18533	0.391354	1.59001	4.71039	6.66686	0.275239	2.17561
2000	1038	37.0163	61.1271	0.371783	12.7368	1.76399	0.00899175	8.19485	0.393114	1.57308	4.69004	6.67849	0.276301	2.18539
2000	1037	36.8513	61.1585	0.37318	12.7038	1.76799	0.00871398	8.20428	0.394874	1.55628	4.66981	6.69006	0.277362	2.19518
2000	1036	36.6876	61.1897	0.374571	12.6708	1.77199	0.00843629	8.2136	0.396636	1.53961	4.64968	6.70156	0.278422	2.20497
2000	1035	36.5253	61.2209	0.375956	12.6378	1.77598	0.00815873	8.22282	0.398398	1.52306	4.62966	6.713	0.27948	2.21477
2000	1034	36.3643	61.2521	0.377335	12.6048	1.77996	0.00788136	8.23194	0.400162	1.50665	4.60974	6.72437	0.280538	2.22457
2000	1033	36.2046	61.2832	0.378708	12.5717	1.78394	0.00760426	8.24095	0.401927	1.49035	4.58993	6.73569	0.281596	2.23439
2000	1032	36.0462	61.3142	0.380075	12.5387	1.7879	0.00732751	8.24986	0.403693	1.47418	4.57022	6.74694	0.282652	2.24421
2000	1031	35.8891	61.3453	0.381434	12.5056	1.79186	0.00705121	8.25865	0.405461	1.45814	4.55062	6.75813	0.283707	2.25403
2000	1030	35.7332	61.3763	0.382785	12.4726	1.79582	0.00677548	8.26734	0.407229	1.44221	4.53112	6.76927	0.284762	2.26386
2000	1029	35.5786	61.4072	0.384129	12.4395	1.79976	0.00650044	8.27591	0.408999	1.42641	4.51172	6.78034	0.285816	2.2737
2000	1028	35.4251	61.4381	0.385463	12.4064	1.8037	0.00622624	8.28437	0.410771	1.41073	4.49242	6.79136	0.286869	2.28355
2000	1027	35.2729	61.469	0.386789	12.3733	1.80762	0.00595304	8.29271	0.412544	1.39517	4.47322	6.80232	0.287921	2.29341
2000	1026	35.1218	61.4999	0.388105	12.3402	1.81154	0.00568104	8.30093	0.414318	1.37972	4.45413	6.81322	0.288972	2.30327
2000	1025	34.9719	61.5308	0.389411	12.3071	1.81544	0.00541043	8.30903	0.416094	1.36439	4.43512	6.82407	0.290023	2.31315
2000	1024	34.8232	61.5616	0.390705	12.274	1.81934	0.00514143	8.31701	0.417872	1.34918	4.41622	6.83487	0.291073	2.32303
2000	1023	34.6755	61.5924	0.391989	12.2408	1.82322	0.0048743	8.32485	0.419651	1.33409	4.39741	6.84561	0.292123	2.33292
2000	1022	34.529	61.6232	0.39326	12.2077	1.8271	0.00460931	8.33257	0.421432	1.31911	4.3787	6.85629	0.293172	2.34282
2000	1021	34.3835	61.654	0.394517	12.1746	1.83096	0.00434674	8.34016	0.423215	1.30425	4.36009	6.86693	0.29422	2.35273
2000	1020	34.2392	61.6848	0.395761	12.1414	1.83481	0.00408693	8.34761	0.424999	1.2895	4.34156	6.87751	0.295268	2.36265
2000	1019	34.0958	61.7156	0.396991	12.1083	1.83864	0.00383021	8.35493	0.426786	1.27486	4.32314	6.88805	0.296315	2.37258
2000	1018	33.9536	61.7464	0.398205	12.0751	1.84246	0.00357697	8.3621	0.428574	1.26033	4.3048	6.89853	0.297362	2.38252
2000	1017	33.8123	61.7772	0.399402	12.042	1.84627	0.0033276	8.36913	0.430365	1.24592	4.28656	6.90896	0.298408	2.39248
2000	1016	33.6721	61.8081	0.400582	12.0088	1.85007	0.00308254	8.37601	0.432157	1.23162	4.26841	6.91935	0.299454	2.40244
2000	1015	33.5328	61.8389	0.401743	11.9756	1.85384	0.00284225	8.38274	0.433952	1.21743	4.25034	6.92969	0.3005	2.41242
2000	1014	33.3945	61.8698	0.402884	11.9424	1.85761	0.00260721	8.38932	0.435749	1.20334	4.23237	6.93998	0.301545	2.42241
2000	1013	33.2572	61.9007	0.404005	11.9092	1.86135	0.00237797	8.39574	0.437548	1.18937	4.21449	6.95023	0.30259	2.43241
2000	1012	33.1209	61.9316	0.405103	11.876	1.86508	0.00215505	8.40199	0.439349	1.1755	4.19669	6.96043	0.303634	2.44242
2000	1011	32.9854	61.9626	0.406178	11.8428	1.86879	0.00193906	8.40808	0.441153	1.16174	4.17898	6.97059	0.304678	2.45245
2000	1010	32.8509	61.9936	0.407228	11.8096	1.87248	0.0017306	8.414	0.442959	1.14809	4.16136	6.98071	0.305722	2.46249
2000	1009	32.7173	62.0247	0.408252	11.7764	1.87615	0.00153032	8.41974	0.444768	1.13455	4.14383	6.99078	0.306766	2.47255
2000	1008	32.5846	62.0558	0.409248	11.7432	1.8798	0.00133889	8.4253	0.446579	1.12111	4.12638	7.00082	0.30781	2.48262
2000	1007	32.4528	62.087	0.410214	11.71	1.88343	0.00115701	8.43067	0.448393	1.10778	4.10901	7.01081	0.308854	2.4927
2000	1006	32.3218	62.1182	0.411148	11.6768	1.88703	0.000985416	8.43585	0.450211	1.09455	4.09173	7.02077	0.309898	2.5028
2000	1005	32.1917	62.1496	0.412048	11.6436	1.89061	0.000824859	8.44083	0.452031	1.08143	4.07453	7.03069	0.310941	2.51292
2000	1004	32.0624	62.181	0.412911	11.6103	1.89416	0.000676118	8.4456	0.453854	1.06841	4.05741	7.04057	0.311985	2.52306
2000	1003	31.9338	62.2126	0.413733	11.5771	1.89769	0.000539992	8.45015	0.45568	1.0555	4.04038	7.05042	0.31303	2.53321
2000	1002	31.8061	62.2443	0.414512	11.5438	1.90118	0.000417299	8.45446	0.45751	1.04269	4.02342	7.06024	0.314074	2.54338
2000	1001	31.6791	62.2761	0.41524	11.5106	1.90463	0.000308868	8.45851	0.459344	1.02998	4.00654	7.07003	0.315119	2.55358
2000	1000	31.5529	62.3081	0.415911	11.4773	1.90805	0.000215533	8.46227	0.461182	1.01738	3.98974	7.0798	0.316165	2.5638
2000	999	31.4273	62.3404	0.41651	11.4441	1.91141	0.000138121	8.46568	0.463025	1.00488	3.97302	7.08955	0.317212	2.57404
2000	998	31.3023	62.3731	0.417012	11.4108	1.91471	7.74331e-05	8.46865	0.464874	0.992493	3.95637	7.09929	0.318261	2.58432
2000	997	31.1777	62.4065	0.417358	11.3776	1.91789	3.419e-05	8.47092	0.466732	0.980214	3.93978	7.10907	0.319315	2.59465
2000	996	31.0527	62.4415	0.417356	11.3443	1.9208	8.86795e-06	8.47169	0.46861	0.96806	3.92324	7.11898	0.320378	2.60509
2000	995	30.9292	62.4757	0.417484	11.311	1.92383	0	8.47301	0.470482	0.955993	3.90679	7.12876	0.321436	2.6155
2000	994	30.7817	62.5467	0.410474	11.2775	1.92132	0	8.44394	0.472735	0.944619	3.88952	7.14241	0.322731	2.62802
2000	993	30.6358	62.6174	0.403554	11.244	1.91881	0	8.4149	0.474988	0.933366	3.87237	7.15597	0.324023	2.64055
2000	992	30.4912	62.6879	0.396723	11.2105	1.91629	0	8.38592	0.47724	0.922233	3.85532	7.16944	0.325312	2.65306
2000	991	30.3481	62.7582	0.389981	11.177	1.91376	0	8.35697	0.479491	0.911217	3.83838	7.18282	0.326599	2.66558
2000	990	30.2063	62.8282	0.383325	11.1435	1.91123	0	8.32807	0.481742	0.900319	3.82155	7.19611	0.327883	2.67809
2000	989	30.0658	62.898	0.376755	11.1099	1.90868	0	8.2992	0.483992	0.889535	3.80483	7.20932	0.329165	2.6906
2000	988	29.9267	62.9676	0.370271	11.0763	1.90613	0	8.27037	0.486241	0.878865	3.78821	7.22243	0.330444	2.70311
2000	987	29.7889	63.037	0.36387	11.0427	1.90357	0	8.24157	0.488491	0.868308	3.7717	7.23546	0.33172	2.71561
2000	986	29.6524	63.1061	0.357553	11.0091	1.90099	0	8.21281	0.490739	0.857862	3.75529	7.2484	0.332994	2.72811
2000	985	29.5172	63.175	0.351317	10.9755	1.89841	0	8.18408	0.492988	0.847525	3.73898	7.26126	0.334266	2.74061
2000	984	29.3832	63.2438	0.345163	10.9419	1.89582	0	8.15539	0.495235	0.837298	3.72278	7.27403	0.335535	2.75311
2000	983	29.2505	63.3123	0.339089	10.9083	1.89322	0	8.12672	0.497483	0.827177	3.70667	7.28672	0.336801	2.7656
2000	982	29.119	63.3806	0.333095	10.8746	1.8906	0	8.09808	0.49973	0.817163	3.69066	7.29932	0.338066	2.77809
2000	981	28.9886	63.4487	0.327179	10.841	1.88798	0	8.06947	0.501976	0.807253	3.67476	7.31185	0.339327	2.79058
2000	980	28.8595	63.5166	0.321341	10.8073	1.88534	0	8.04088	0.504223	0.797447	3.65894	7.32429	0.340587	2.80307
2000	979	28.7315	63.5843	0.315579	10.7736	1.8827	0	8.01232	0.506469	0.787743	3.64323	7.33665	0.341843	2.81555
2000	978	28.6047	63.6518	0.309893	10.74	1.88004	0	7.98378	0.508715	0.778141	3.62761	7.34893	0.343098	2.82804
2000	977	28.479	63.7191	0.304283	10.7063	1.87737	0	7.95526	0.51096	0.768639	3.61208	7.36114	0.34435	2.84052
2000	976	28.3544	63.7863	0.298747	10.6726	1.87468	0	7.92677	0.513205	0.759236	3.59665	7.37327	0.3456	2.853
2000	975	28.2309	63.8532	0.293284	10.6389	1.87199	0	7.89829	0.51545	0.749931	3.58131	7.38532	0.346847	2.86549
2000	974	28.1085	63.92	0.287894	10.6052	1.86928	0	7.86983	0.517695	0.740723	3.56606	7.39729	0.348092	2.87796
2000	973	27.9871	63.9866	0.282576	10.5715	1.86656	0	7.84138	0.51994	0.731611	3.55091	7.40919	0.349335	2.89044
2000	972	27.8668	64.053	0.277329	10.5378	1.86382	0	7.81296	0.522184	0.722594	3.53584	7.42101	0.350575	2.90292
2000	971	27.7476	64.1192	0.272152	10.5041	1.86107	0	7.78454	0.524429	0.713671	3.52086	7.43276	0.351813	2.9154
2000	970	27.6293	64.1853	0.267046	10.4704	1.85831	0	7.75614	0.526673	0.704841	3.50597	7.44443	0.353048	2.92787
2000	969	27.5121	64.2512	0.262008	10.4367	1.85553	0	7.72775	0.528917	0.696102	3.49116	7.45604	0.354282	2.94035
2000	968	27.3959	64.3169	0.257038	10.403	1.85274	0	7.69937	0.531161	0.687454	3.47644	7.46757	0.355513	2.95282
2000	967	27.2806	64.3825	0.252136	10.3693	1.84993	0	7.671	0.533405	0.678897	3.46181	7.47903	0.356742	2.9653
2000	966	27.1664	64.4479	0.247301	10.3356	1.84711	0	7.64264	0.535648	0.670428	3.44726	7.49041	0.357968	2.97777
2000	965	27.053	64.5132	0.242533	10.3019	1.84427	0	7.61429	0.537892	0.662048	3.43279	7.50173	0.359193	2.99024
2000	964	26.9407	64.5783	0.237829	10.2682	1.84142	0	7.58594	0.540136	0.653755	3.41841	7.51298	0.360415	3.00272
2000	963	26.8292	64.6432	0.233191	10.2345	1.83854	0	7.5576	0.542379	0.645548	3.4041	7.52416	0.361634	3.01519
2000	962	26.7187	64.708	0.228617	10.2008	1.83566	0	7.52926	0.544623	0.637427	3.38988	7.53527	0.362852	3.02766
2000	961	26.6091	64.7726	0.224106	10.1671	1.83275	0	7.50092	0.546867	0.62939	3.37574	7.54631	0.364067	3.04013
2000	960	26.5004	64.8371	0.219658	10.1334	1.82983	0	7.47258	0.54911	0.621438	3.36168	7.55729	0.365281	3.05261
2000	959	26.3925	64.9015	0.215273	10.0997	1.8269	0	7.44425	0.551354	0.613568	3.3477	7.5682	0.366492	3.06508
2000	958	26.2856	64.9657	0.21095	10.066	1.82394	0	7.41591	0.553598	0.605781	3.33379	7.57905	0.3677	3.07755
2000	957	26.1795	65.0298	0.206687	10.0324	1.82097	0	7.38757	0.555841	0.598075	3.31996	7.58983	0.368907	3.09002
2000	956	26.0742	65.0937	0.202485	9.99873	1.81797	0	7.35923	0.558085	0.590449	3.30621	7.60054	0.370111	3.1025
2000	955	25.9698	65.1575	0.198343	9.96508	1.81496	0	7.33089	0.560329	0.582904	3.29253	7.61119	0.371313	3.11497
2000	954	25.8662	65.2211	0.194261	9.93144	1.81193	0	7.30254	0.562573	0.575437	3.27893	7.62178	0.372513	3.12745
2000	953	25.7634	65.2847	0.190237	9.89781	1.80888	0	7.27419	0.564817	0.56805	3.2654	7.63231	0.373711	3.13992
2000	952	25.6615	65.3481	0.186271	9.86419	1.80582	0	7.24582	0.567061	0.560739	3.25194	7.64277	0.374907	3.1524
2000	951	25.5603	65.4114	0.182363	9.83058	1.80273	0	7.21745	0.569305	0.553506	3.23856	7.65317	0.3761	3.16487
2000	950	25.46	65.4745	0.178512	9.79698	1.79962	0	7.18907	0.571549	0.546349	3.22524	7.66351	0.377292	3.17735
2000	949	25.3604	65.5376	0.174718	9.76339	1.79649	0	7.16068	0.573794	0.539268	3.212	7.67379	0.378481	3.18983
2000	948	25.2615	65.6005	0.17098	9.72981	1.79334	0	7.13228	0.576038	0.532261	3.19883	7.68401	0.379668	3.2023
2000	947	25.1635	65.6633	0.167297	9.69625	1.79017	0	7.10387	0.578283	0.525329	3.18573	7.69417	0.380853	3.21478
2000	946	25.0662	65.726	0.163669	9.6627	1.78698	0	7.07544	0.580528	0.51847	3.17269	7.70428	0.382036	3.22726
2000	945	24.9696	65.7885	0.160096	9.62916	1.78376	0	7.047	0.582773	0.511685	3.15972	7.71432	0.383217	3.23974
2000	944	24.8738	65.851	0.156577	9.59563	1.78053	0	7.01854	0.585018	0.504971	3.14682	7.7243	0.384395	3.25222
2000	943	24.7787	65.9133	0.153111	9.56212	1.77727	0	6.99007	0.587263	0.49833	3.13399	7.73423	0.385572	3.26471
2000	942	24.6843	65.9756	0.149698	9.52863	1.77399	0	6.96158	0.589509	0.491759	3.12122	7.7441	0.386746	3.27719
2000	941	24.5906	66.0377	0.146337	9.49515	1.77068	0	6.93307	0.591755	0.485259	3.10852	7.75392	0.387919	3.28967
2000	940	24.4977	66.0997	0.143029	9.46169	1.76735	0	6.90455	0.594001	0.478829	3.09588	7.76368	0.389089	3.30216
2000	939	24.4054	66.1617	0.139772	9.42824	1.764	0	6.876	0.596247	0.472468	3.08331	7.77338	0.390257	3.31465
2000	938	24.3138	66.2235	0.136566	9.39481	1.76062	0	6.84743	0.598493	0.466176	3.0708	7.78303	0.391423	3.32713
2000	937	24.2228	66.2853	0.133411	9.3614	1.75722	0	6.81884	0.600739	0.459952	3.05835	7.79262	0.392587	3.33962
2000	936	24.1326	66.3469	0.130305	9.328	1.7538	0	6.79023	0.602986	0.453796	3.04596	7.80216	0.393749	3.35211
2000	935	24.043	66.4085	0.12725	9.29463	1.75034	0	6.76159	0.605233	0.447707	3.03363	7.81165	0.394909	3.3646
2000	934	23.9541	66.4699	0.124243	9.26127	1.74687	0	6.73293	0.60748	0.441685	3.02137	7.82108	0.396066	3.37709
2000	933	23.8658	66.5313	0.121286	9.22793	1.74336	0	6.70424	0.609727	0.435728	3.00916	7.83046	0.397222	3.38959
2000	932	23.7781	66.5926	0.118376	9.19462	1.73983	0	6.67552	0.611975	0.429837	2.99701	7.83979	0.398375	3.40208
2000	931	23.6911	66.6538	0.115515	9.16132	1.73628	0	6.64678	0.614223	0.424012	2.98492	7.84907	0.399527	3.41458
2000	930	23.6047	66.7149	0.112701	9.12804	1.73269	0	6.61801	0.616471	0.41825	2.97289	7.85829	0.400676	3.42708
2000	929	23.519	66.7759	0.109934	9.09479	1.72908	0	6.58921	0.618719	0.412553	2.96091	7.86747	0.401824	3.43957
2000	928	23.4338	66.8369	0.107213	9.06155	1.72544	0	6.56038	0.620967	0.40692	2.94899	7.87659	0.402969	3.45207
2000	927	23.3492	66.8978	0.104538	9.02834	1.72178	0	6.53152	0.623216	0.401349	2.93713	7.88566	0.404112	3.46457
2000	926	23.2653	66.9586	0.10191	8.99515	1.71808	0	6.50262	0.625465	0.395842	2.92532	7.89469	0.405253	3.47707
2000	925	23.1819	67.0193	0.0993263	8.96199	1.71436	0	6.4737	0.627714	0.390396	2.91356	7.90366	0.406392	3.48958
2000	924	23.0992	67.08	0.0967877	8.92884	1.7106	0	6.44474	0.629963	0.385012	2.90186	7.91259	0.407529	3.50208
2000	923	23.017	67.1406	0.0942936	8.89572	1.70682	0	6.41574	0.632213	0.37969	2.89021	7.92146	0.408664	3.51459
2000	922	22.9354	67.2011	0.0918436	8.86263	1.70301	0	6.38671	0.634462	0.374428	2.87861	7.93029	0.409797	3.52709
2000	921	22.8543	67.2616	0.0894372	8.82956	1.69916	0	6.35764	0.636712	0.369227	2.86707	7.93907	0.410927	3.5396
2000	920	22.7738	67.322	0.0870741	8.79652	1.69529	0	6.32854	0.638962	0.364086	2.85558	7.94781	0.412056	3.55211
2000	919	22.6939	67.3823	0.0847539	8.7635	1.69138	0	6.2994	0.641213	0.359005	2.84413	7.95649	0.413182	3.56462
2000	918	22.6145	67.4426	0.0824762	8.7305	1.68744	0	6.27022	0.643463	0.353982	2.83274	7.96513	0.414307	3.57713
2000	917	22.5357	67.5028	0.0802405	8.69754	1.68348	0	6.241	0.645714	0.349019	2.8214	7.97372	0.415429	3.58964
2000	916	22.4574	67.563	0.0780466	8.6646	1.67947	0	6.21174	0.647965	0.344114	2.8101	7.98227	0.41655	3.60216
2000	915	22.3797	67.6231	0.0758939	8.63169	1.67544	0	6.18244	0.650216	0.339267	2.79886	7.99077	0.417668	3.61467
2000	914	22.1811	67.8256	0.0768021	8.60337	1.64179	0	6.01955	0.635066	0.305351	2.79594	8.02864	0.420824	3.64702
2000	913	22.1014	67.8807	0.0770793	8.56875	1.63894	0	5.99484	0.633123	0.298923	2.78875	8.0367	0.421981	3.66019
2000	912	22.0221	67.9358	0.0773567	8.53417	1.63604	0	5.96999	0.631176	0.292585	2.78162	8.04474	0.423136	3.67336
2000	911	21.9433	67.9909	0.0776344	8.49962	1.6331	0	5.94502	0.629225	0.286339	2.77454	8.05276	0.42429	3.68655
2000	910	21.8634	68.0541	0.0769333	8.46473	1.62836	0	5.91265	0.627859	0.280955	2.76764	8.06124	0.425475	3.70003
2000	909	21.783	68.122	0.0756676	8.42965	1.62255	0	5.87599	0.626843	0.276107	2.76087	8.06996	0.426675	3.71369
2000	908	21.7032	68.1897	0.0744242	8.3946	1.61674	0	5.83944	0.625824	0.271325	2.75414	8.07864	0.427872	3.72734
2000	907	21.6241	68.2571	0.0732029	8.35957	1.61091	0	5.803	0.6248	0.266606	2.74747	8.08726	0.429067	3.74098
2000	906	21.5455	68.3244	0.0720031	8.32457	1.60508	0	5.76669	0.623773	0.261951	2.74084	8.09584	0.430259	3.75461
2000	905	21.4676	68.3915	0.0708247	8.2896	1.59924	0	5.73049	0.622742	0.257359	2.73425	8.10436	0.431447	3.76824
2000	904	21.3903	68.4583	0.0696673	8.25466	1.59339	0	5.69441	0.621708	0.252829	2.72771	8.11283	0.432633	3.78185
2000	903	21.3137	68.525	0.0685305	8.21975	1.58754	0	5.65845	0.620671	0.248361	2.72121	8.12125	0.433816	3.79546
2000	902	21.2376	68.5914	0.0674139	8.18486	1.58167	0	5.62262	0.61963	0.243954	2.71477	8.12962	0.434996	3.80906
2000	901	21.1621	68.6576	0.0663174	8.15001	1.5758	0	5.58691	0.618586	0.239608	2.70836	8.13794	0.436173	3.82265
2000	900	21.0872	68.7237	0.0652405	8.11518	1.56992	0	5.55132	0.617538	0.235321	2.702	8.14621	0.437347	3.83623
Title:	R-magma	-	mresidual	from	MZ-magma	at	T	=	1145	C
liquid_0	thermodynamic	data	and	composition:
Pressure	Temperature	mass	S	H	V	Cp	viscosity	SiO2	TiO2	Al2O3	Fe2O3	Cr2O3	FeO	MnO	MgO	CaO	Na2O	K2O	H2O	Mg#
2000	1400	99.9956	294.74	-1.22563e+06	39.9364	150.1	2.041	55.6847	0.151335	17.0883	1.04768	0.00460845	5.877	0.145523	6.10163	8.88673	4.09126	0.112218	0.808987	64.9
2000	1400	99.9956	294.74	-1.22563e+06	39.9364	150.1	2.041	55.6847	0.151335	17.0883	1.04768	0.00460845	5.877	0.145523	6.10163	8.88673	4.09126	0.112218	0.808987	64.9
2000	1399	99.9957	294.65	-1.22578e+06	39.9332	150.099	2.045	55.6847	0.151335	17.0883	1.0478	0.00460845	5.87689	0.145523	6.10163	8.88673	4.09126	0.112218	0.808987	64.9
2000	1398	99.9957	294.561	-1.22593e+06	39.9301	150.099	2.049	55.6847	0.151335	17.0883	1.04793	0.00460845	5.87677	0.145523	6.10163	8.88673	4.09126	0.112218	0.808987	64.9
2000	1397	99.9957	294.471	-1.22608e+06	39.9269	150.099	2.052	55.6847	0.151335	17.0883	1.04805	0.00460845	5.87666	0.145522	6.10163	8.88673	4.09126	0.112218	0.808987	64.9
2000	1396	99.9957	294.381	-1.22623e+06	39.9238	150.098	2.056	55.6846	0.151335	17.0883	1.04818	0.00460845	5.87655	0.145522	6.10163	8.88673	4.09126	0.112218	0.808986	64.9
2000	1395	99.9957	294.291	-1.22638e+06	39.9206	150.098	2.06	55.6846	0.151335	17.0883	1.0483	0.00460845	5.87644	0.145522	6.10163	8.88673	4.09126	0.112218	0.808986	64.9
2000	1394	99.9957	294.201	-1.22653e+06	39.9174	150.098	2.064	55.6846	0.151335	17.0883	1.04843	0.00460845	5.87632	0.145522	6.10163	8.88672	4.09126	0.112218	0.808986	64.9
2000	1393	99.9957	294.111	-1.22668e+06	39.9143	150.097	2.068	55.6846	0.151335	17.0883	1.04856	0.00460845	5.8762	0.145522	6.10163	8.88672	4.09126	0.112218	0.808986	64.9
2000	1392	99.9957	294.021	-1.22683e+06	39.9111	150.097	2.072	55.6846	0.151335	17.0883	1.04869	0.00460845	5.87609	0.145522	6.10163	8.88672	4.09126	0.112218	0.808986	64.9
2000	1391	99.9958	293.931	-1.22698e+06	39.908	150.097	2.076	55.6846	0.151335	17.0883	1.04882	0.00460845	5.87597	0.145522	6.10163	8.88672	4.09126	0.112218	0.808986	64.9
2000	1390	99.9958	293.841	-1.22713e+06	39.9048	150.097	2.08	55.6846	0.151335	17.0883	1.04895	0.00460845	5.87585	0.145522	6.10163	8.88672	4.09126	0.112218	0.808986	64.9
2000	1389	99.9958	293.75	-1.22728e+06	39.9016	150.096	2.083	55.6846	0.151335	17.0883	1.04908	0.00460845	5.87573	0.145522	6.10163	8.88672	4.09126	0.112218	0.808986	64.9
2000	1388	99.9958	293.66	-1.22743e+06	39.8985	150.096	2.087	55.6846	0.151335	17.0883	1.04922	0.00460845	5.8756	0.145522	6.10163	8.88672	4.09126	0.112218	0.808986	64.9
2000	1387	99.9958	293.57	-1.22758e+06	39.8953	150.096	2.091	55.6846	0.151335	17.0883	1.04936	0.00460845	5.87548	0.145522	6.10162	8.88672	4.09126	0.112218	0.808986	64.9
2000	1386	99.9958	293.479	-1.22773e+06	39.8922	150.095	2.095	55.6846	0.151335	17.0883	1.04949	0.00460845	5.87535	0.145522	6.10162	8.88672	4.09125	0.112218	0.808985	64.9
2000	1385	99.9958	293.389	-1.22788e+06	39.889	150.095	2.099	55.6846	0.151335	17.0883	1.04963	0.00460845	5.87523	0.145522	6.10162	8.88671	4.09125	0.112218	0.808985	64.9
2000	1384	99.9958	293.298	-1.22803e+06	39.8858	150.095	2.103	55.6846	0.151335	17.0883	1.04977	0.00460844	5.8751	0.145522	6.10162	8.88671	4.09125	0.112218	0.808985	64.9
2000	1383	99.9959	293.208	-1.22818e+06	39.8827	150.094	2.107	55.6845	0.151335	17.0883	1.04991	0.00460844	5.87497	0.145522	6.10162	8.88671	4.09125	0.112218	0.808985	64.9
2000	1382	99.9959	293.117	-1.22833e+06	39.8795	150.094	2.111	55.6845	0.151335	17.0883	1.05006	0.00460844	5.87484	0.145522	6.10162	8.88671	4.09125	0.112218	0.808985	64.9
2000	1381	99.9959	293.027	-1.22848e+06	39.8764	150.094	2.115	55.6845	0.151335	17.0883	1.0502	0.00460844	5.87471	0.145522	6.10162	8.88671	4.09125	0.112218	0.808985	64.9
2000	1380	99.9959	292.936	-1.22863e+06	39.8732	150.093	2.119	55.6845	0.151335	17.0883	1.05035	0.00460844	5.87458	0.145522	6.10162	8.88671	4.09125	0.112218	0.808985	64.9
2000	1379	99.9959	292.845	-1.22878e+06	39.8701	150.093	2.123	55.6845	0.151335	17.0883	1.05049	0.00460844	5.87445	0.145522	6.10162	8.88671	4.09125	0.112218	0.808985	64.9
2000	1378	99.9959	292.754	-1.22893e+06	39.8669	150.093	2.127	55.6845	0.151335	17.0883	1.05064	0.00460844	5.87431	0.145522	6.10162	8.88671	4.09125	0.112218	0.808984	64.9
2000	1377	99.9959	292.663	-1.22908e+06	39.8638	150.092	2.131	55.6845	0.151335	17.0883	1.05079	0.00460844	5.87418	0.145522	6.10162	8.8867	4.09125	0.112218	0.808984	64.9
2000	1376	99.996	292.572	-1.22924e+06	39.8606	150.092	2.134	55.6845	0.151335	17.0883	1.05094	0.00460844	5.87404	0.145522	6.10161	8.8867	4.09125	0.112218	0.808984	64.9
2000	1375	99.996	292.481	-1.22939e+06	39.8574	150.092	2.138	55.6845	0.151335	17.0883	1.05109	0.00460844	5.8739	0.145522	6.10161	8.8867	4.09125	0.112218	0.808984	64.9
2000	1374	99.996	292.39	-1.22954e+06	39.8543	150.092	2.142	55.6845	0.151335	17.0883	1.05125	0.00460844	5.87377	0.145522	6.10161	8.8867	4.09125	0.112218	0.808984	64.9
2000	1373	99.996	292.299	-1.22969e+06	39.8511	150.091	2.146	55.6845	0.151335	17.0883	1.0514	0.00460844	5.87363	0.145522	6.10161	8.8867	4.09125	0.112218	0.808984	64.9
2000	1372	99.996	292.208	-1.22984e+06	39.848	150.091	2.15	55.6845	0.151335	17.0883	1.05156	0.00460844	5.87348	0.145522	6.10161	8.8867	4.09125	0.112218	0.808984	64.9
2000	1371	99.996	292.117	-1.22999e+06	39.8448	150.091	2.154	55.6844	0.151335	17.0883	1.05171	0.00460844	5.87334	0.145522	6.10161	8.8867	4.09125	0.112218	0.808984	64.9
2000	1370	99.9961	292.026	-1.23014e+06	39.8417	150.09	2.158	55.6844	0.151335	17.0883	1.05187	0.00460844	5.8732	0.145522	6.10161	8.88669	4.09125	0.112218	0.808983	64.9
2000	1369	99.9961	291.934	-1.23029e+06	39.8385	150.09	2.162	55.6844	0.151335	17.0883	1.05203	0.00460843	5.87305	0.145522	6.10161	8.88669	4.09124	0.112218	0.808983	64.9
2000	1368	99.9961	291.843	-1.23044e+06	39.8354	150.09	2.166	55.6844	0.151335	17.0883	1.05219	0.00460843	5.87291	0.145522	6.10161	8.88669	4.09124	0.112218	0.808983	64.9
2000	1367	99.9961	291.751	-1.23059e+06	39.8322	150.089	2.17	55.6844	0.151335	17.0883	1.05236	0.00460843	5.87276	0.145522	6.10161	8.88669	4.09124	0.112218	0.808983	64.9
2000	1366	99.9961	291.66	-1.23074e+06	39.8291	150.089	2.174	55.6844	0.151335	17.0883	1.05252	0.00460843	5.87261	0.145522	6.10161	8.88669	4.09124	0.112218	0.808983	64.9
2000	1365	99.9961	291.568	-1.23089e+06	39.8259	150.089	2.178	55.6844	0.151335	17.0883	1.05268	0.00460843	5.87246	0.145522	6.1016	8.88669	4.09124	0.112218	0.808983	64.9
2000	1364	99.9962	291.477	-1.23104e+06	39.8227	150.089	2.182	55.6844	0.151335	17.0883	1.05285	0.00460843	5.87231	0.145522	6.1016	8.88669	4.09124	0.112218	0.808983	64.9
2000	1363	99.9962	291.385	-1.23119e+06	39.8196	150.088	2.186	55.6844	0.151335	17.0883	1.05302	0.00460843	5.87216	0.145522	6.1016	8.88668	4.09124	0.112218	0.808983	64.9
2000	1362	99.9962	291.293	-1.23134e+06	39.8164	150.088	2.19	55.6844	0.151335	17.0883	1.05319	0.00460843	5.872	0.145522	6.1016	8.88668	4.09124	0.112218	0.808982	64.9
2000	1361	99.9962	291.202	-1.23149e+06	39.8133	150.088	2.194	55.6844	0.151334	17.0883	1.05336	0.00460843	5.87185	0.145522	6.1016	8.88668	4.09124	0.112218	0.808982	64.9
2000	1360	99.9962	291.11	-1.23164e+06	39.8101	150.087	2.198	55.6843	0.151334	17.0882	1.05353	0.00460843	5.87169	0.145522	6.1016	8.88668	4.09124	0.112218	0.808982	64.9
2000	1359	99.9962	291.018	-1.23179e+06	39.807	150.087	2.202	55.6843	0.151334	17.0882	1.0537	0.00460843	5.87154	0.145522	6.1016	8.88668	4.09124	0.112218	0.808982	64.9
2000	1358	99.9963	290.926	-1.23194e+06	39.8038	150.087	2.207	55.6843	0.151334	17.0882	1.05388	0.00460843	5.87138	0.145522	6.1016	8.88668	4.09124	0.112218	0.808982	64.9
2000	1357	99.9963	290.834	-1.23209e+06	39.8007	150.087	2.211	55.6843	0.151334	17.0882	1.05406	0.00460843	5.87122	0.145522	6.1016	8.88667	4.09124	0.112218	0.808982	64.9
2000	1356	99.9963	290.742	-1.23224e+06	39.7975	150.086	2.215	55.6843	0.151334	17.0882	1.05423	0.00460842	5.87106	0.145522	6.10159	8.88667	4.09124	0.112218	0.808982	64.9
2000	1355	99.9963	290.65	-1.23239e+06	39.7944	150.086	2.219	55.6843	0.151334	17.0882	1.05441	0.00460842	5.87089	0.145522	6.10159	8.88667	4.09123	0.112217	0.808981	64.9
2000	1354	99.9963	290.558	-1.23254e+06	39.7912	150.086	2.223	55.6843	0.151334	17.0882	1.05459	0.00460842	5.87073	0.145522	6.10159	8.88667	4.09123	0.112217	0.808981	64.9
2000	1353	99.9964	290.465	-1.23269e+06	39.7881	150.085	2.227	55.6843	0.151334	17.0882	1.05478	0.00460842	5.87057	0.145522	6.10159	8.88667	4.09123	0.112217	0.808981	64.9
2000	1352	99.9964	290.373	-1.23284e+06	39.7849	150.085	2.231	55.6843	0.151334	17.0882	1.05496	0.00460842	5.8704	0.145521	6.10159	8.88667	4.09123	0.112217	0.808981	64.9
2000	1351	99.9964	290.281	-1.23299e+06	39.7818	150.085	2.235	55.6843	0.151334	17.0882	1.05514	0.00460842	5.87023	0.145521	6.10159	8.88666	4.09123	0.112217	0.808981	64.9
2000	1350	99.9964	290.188	-1.23314e+06	39.7786	150.085	2.239	55.6842	0.151334	17.0882	1.05533	0.00460842	5.87006	0.145521	6.10159	8.88666	4.09123	0.112217	0.808981	64.9
2000	1349	99.9964	290.096	-1.23329e+06	39.7755	150.084	2.243	55.6842	0.151334	17.0882	1.05552	0.00460842	5.86989	0.145521	6.10159	8.88666	4.09123	0.112217	0.808981	64.9
2000	1348	99.9964	290.003	-1.23344e+06	39.7723	150.084	2.247	55.6842	0.151334	17.0882	1.05571	0.00460842	5.86972	0.145521	6.10159	8.88666	4.09123	0.112217	0.80898	64.9
2000	1347	99.9965	289.911	-1.23359e+06	39.7692	150.084	2.251	55.6842	0.151334	17.0882	1.0559	0.00460842	5.86955	0.145521	6.10158	8.88666	4.09123	0.112217	0.80898	64.9
2000	1346	99.9965	289.818	-1.23375e+06	39.766	150.083	2.255	55.6842	0.151334	17.0882	1.05609	0.00460842	5.86938	0.145521	6.10158	8.88666	4.09123	0.112217	0.80898	64.9
2000	1345	99.9965	289.726	-1.2339e+06	39.7629	150.083	2.26	55.6842	0.151334	17.0882	1.05628	0.00460841	5.8692	0.145521	6.10158	8.88665	4.09123	0.112217	0.80898	64.9
2000	1344	99.9965	289.633	-1.23405e+06	39.7598	150.083	2.264	55.6842	0.151334	17.0882	1.05648	0.00460841	5.86902	0.145521	6.10158	8.88665	4.09123	0.112217	0.80898	64.9
2000	1343	99.9965	289.54	-1.2342e+06	39.7566	150.083	2.268	55.6842	0.151334	17.0882	1.05667	0.00460841	5.86885	0.145521	6.10158	8.88665	4.09123	0.112217	0.80898	64.9
2000	1342	99.9966	289.447	-1.23435e+06	39.7535	150.082	2.272	55.6842	0.151334	17.0882	1.05687	0.00460841	5.86867	0.145521	6.10158	8.88665	4.09122	0.112217	0.808979	64.9
2000	1341	99.9966	289.354	-1.2345e+06	39.7503	150.082	2.276	55.6841	0.151334	17.0882	1.05707	0.00460841	5.86849	0.145521	6.10158	8.88665	4.09122	0.112217	0.808979	64.9
2000	1340	99.9966	289.261	-1.23465e+06	39.7472	150.082	2.28	55.6841	0.151334	17.0882	1.05727	0.00460841	5.86831	0.145521	6.10158	8.88665	4.09122	0.112217	0.808979	65
2000	1339	99.9966	289.168	-1.2348e+06	39.744	150.081	2.284	55.6841	0.151334	17.0882	1.05747	0.00460841	5.86812	0.145521	6.10157	8.88664	4.09122	0.112217	0.808979	65
2000	1338	99.9966	289.075	-1.23495e+06	39.7409	150.081	2.288	55.6841	0.151334	17.0882	1.05767	0.00460841	5.86794	0.145521	6.10157	8.88664	4.09122	0.112217	0.808979	65
2000	1337	99.9967	288.982	-1.2351e+06	39.7377	150.081	2.293	55.6841	0.151334	17.0882	1.05788	0.00460841	5.86775	0.145521	6.10157	8.88664	4.09122	0.112217	0.808979	65
2000	1336	99.9967	288.889	-1.23525e+06	39.7346	150.081	2.297	55.6841	0.151334	17.0882	1.05808	0.00460841	5.86757	0.145521	6.10157	8.88664	4.09122	0.112217	0.808978	65
2000	1335	99.9967	288.796	-1.2354e+06	39.7314	150.08	2.301	55.6841	0.151334	17.0882	1.05829	0.00460841	5.86738	0.145521	6.10157	8.88664	4.09122	0.112217	0.808978	65
2000	1334	99.9967	288.702	-1.23555e+06	39.7283	150.08	2.305	55.6841	0.151334	17.0882	1.0585	0.0046084	5.86719	0.145521	6.10157	8.88664	4.09122	0.112217	0.808978	65
2000	1333	99.9967	288.609	-1.2357e+06	39.7251	150.08	2.309	55.6841	0.151334	17.0882	1.05871	0.0046084	5.867	0.145521	6.10157	8.88663	4.09122	0.112217	0.808978	65
2000	1332	99.9968	288.516	-1.23585e+06	39.722	150.08	2.313	55.684	0.151334	17.0882	1.05892	0.0046084	5.8668	0.145521	6.10157	8.88663	4.09122	0.112217	0.808978	65
2000	1331	99.9968	288.422	-1.236e+06	39.7189	150.079	2.318	55.684	0.151334	17.0882	1.05914	0.0046084	5.86661	0.145521	6.10156	8.88663	4.09122	0.112217	0.808978	65
2000	1330	99.9968	288.328	-1.23615e+06	39.7157	150.079	2.322	55.684	0.151334	17.0881	1.05935	0.0046084	5.86642	0.145521	6.10156	8.88663	4.09121	0.112217	0.808977	65
2000	1329	99.9968	288.235	-1.2363e+06	39.7126	150.079	2.326	55.684	0.151334	17.0881	1.05957	0.0046084	5.86622	0.145521	6.10156	8.88663	4.09121	0.112217	0.808977	65
2000	1328	99.9969	288.141	-1.23645e+06	39.7094	150.079	2.33	55.684	0.151334	17.0881	1.05979	0.0046084	5.86602	0.145521	6.10156	8.88662	4.09121	0.112217	0.808977	65
2000	1327	99.9969	288.048	-1.2366e+06	39.7063	150.078	2.334	55.684	0.151333	17.0881	1.06001	0.0046084	5.86582	0.145521	6.10156	8.88662	4.09121	0.112217	0.808977	65
2000	1326	99.9969	287.954	-1.23675e+06	39.7031	150.078	2.339	55.684	0.151333	17.0881	1.06023	0.0046084	5.86562	0.145521	6.10156	8.88662	4.09121	0.112217	0.808977	65
2000	1325	99.9969	287.86	-1.2369e+06	39.7	150.078	2.343	55.684	0.151333	17.0881	1.06045	0.0046084	5.86542	0.145521	6.10156	8.88662	4.09121	0.112217	0.808976	65
2000	1324	99.9969	287.766	-1.23705e+06	39.6969	150.077	2.347	55.6839	0.151333	17.0881	1.06068	0.00460839	5.86522	0.145521	6.10156	8.88662	4.09121	0.112217	0.808976	65
2000	1323	99.997	287.672	-1.2372e+06	39.6937	150.077	2.351	55.6839	0.151333	17.0881	1.0609	0.00460839	5.86501	0.145521	6.10155	8.88661	4.09121	0.112217	0.808976	65
2000	1322	99.997	287.578	-1.23735e+06	39.6906	150.077	2.356	55.6839	0.151333	17.0881	1.06113	0.00460839	5.86481	0.145521	6.10155	8.88661	4.09121	0.112217	0.808976	65
2000	1321	99.997	287.484	-1.2375e+06	39.6874	150.077	2.36	55.6839	0.151333	17.0881	1.06136	0.00460839	5.8646	0.145521	6.10155	8.88661	4.09121	0.112217	0.808976	65
2000	1320	99.997	287.39	-1.23765e+06	39.6843	150.076	2.364	55.6839	0.151333	17.0881	1.06159	0.00460839	5.86439	0.145521	6.10155	8.88661	4.09121	0.112217	0.808976	65
2000	1319	99.9971	287.296	-1.23781e+06	39.6812	150.076	2.368	55.6839	0.151333	17.0881	1.06182	0.00460839	5.86418	0.14552	6.10155	8.88661	4.0912	0.112217	0.808975	65
2000	1318	99.9971	287.202	-1.23796e+06	39.678	150.076	2.372	55.6839	0.151333	17.0881	1.06205	0.00460839	5.86397	0.14552	6.10155	8.8866	4.0912	0.112217	0.808975	65
2000	1317	99.9971	287.107	-1.23811e+06	39.6749	150.076	2.377	55.6839	0.151333	17.0881	1.06229	0.00460839	5.86375	0.14552	6.10155	8.8866	4.0912	0.112217	0.808975	65
2000	1316	99.9971	287.013	-1.23826e+06	39.6717	150.075	2.381	55.6838	0.151333	17.0881	1.06252	0.00460839	5.86354	0.14552	6.10154	8.8866	4.0912	0.112217	0.808975	65
2000	1315	99.9972	286.918	-1.23841e+06	39.6686	150.075	2.385	55.6838	0.151333	17.0881	1.06276	0.00460838	5.86332	0.14552	6.10154	8.8866	4.0912	0.112217	0.808975	65
2000	1314	99.9972	286.824	-1.23856e+06	39.6655	150.075	2.39	55.6838	0.151333	17.0881	1.063	0.00460838	5.86311	0.14552	6.10154	8.88659	4.0912	0.112217	0.808974	65
2000	1313	99.9972	286.729	-1.23871e+06	39.6623	150.075	2.394	55.6838	0.151333	17.0881	1.06324	0.00460838	5.86289	0.14552	6.10154	8.88659	4.0912	0.112217	0.808974	65
2000	1312	99.9972	286.635	-1.23886e+06	39.6592	150.074	2.398	55.6838	0.151333	17.0881	1.06349	0.00460838	5.86267	0.14552	6.10154	8.88659	4.0912	0.112216	0.808974	65
2000	1311	99.9972	286.54	-1.23901e+06	39.656	150.074	2.402	55.6838	0.151333	17.0881	1.06373	0.00460838	5.86245	0.14552	6.10154	8.88659	4.0912	0.112216	0.808974	65
2000	1310	99.9973	286.445	-1.23916e+06	39.6529	150.074	2.407	55.6838	0.151333	17.0881	1.06398	0.00460838	5.86222	0.14552	6.10154	8.88659	4.0912	0.112216	0.808974	65
2000	1309	99.9973	286.351	-1.23931e+06	39.6498	150.074	2.411	55.6837	0.151333	17.0881	1.06422	0.00460838	5.862	0.14552	6.10153	8.88658	4.09119	0.112216	0.808973	65
2000	1308	99.9973	286.256	-1.23946e+06	39.6466	150.073	2.415	55.6837	0.151333	17.0881	1.06447	0.00460838	5.86177	0.14552	6.10153	8.88658	4.09119	0.112216	0.808973	65
2000	1307	99.9973	286.161	-1.23961e+06	39.6435	150.073	2.42	55.6837	0.151333	17.0881	1.06472	0.00460838	5.86155	0.14552	6.10153	8.88658	4.09119	0.112216	0.808973	65
2000	1306	99.9974	286.066	-1.23976e+06	39.6404	150.073	2.424	55.6837	0.151333	17.0881	1.06498	0.00460837	5.86132	0.14552	6.10153	8.88658	4.09119	0.112216	0.808973	65
2000	1305	99.9974	285.971	-1.23991e+06	39.6372	150.073	2.428	55.6837	0.151333	17.088	1.06523	0.00460837	5.86109	0.14552	6.10153	8.88658	4.09119	0.112216	0.808973	65
2000	1304	99.9974	285.876	-1.24006e+06	39.6341	150.072	2.433	55.6837	0.151333	17.088	1.06549	0.00460837	5.86086	0.14552	6.10153	8.88657	4.09119	0.112216	0.808972	65
2000	1303	99.9975	285.781	-1.24021e+06	39.631	150.072	2.437	55.6837	0.151333	17.088	1.06574	0.00460837	5.86062	0.14552	6.10152	8.88657	4.09119	0.112216	0.808972	65
2000	1302	99.9975	285.686	-1.24036e+06	39.6278	150.072	2.441	55.6836	0.151333	17.088	1.066	0.00460837	5.86039	0.14552	6.10152	8.88657	4.09119	0.112216	0.808972	65
2000	1301	99.9975	285.59	-1.24051e+06	39.6247	150.072	2.446	55.6836	0.151333	17.088	1.06626	0.00460837	5.86015	0.14552	6.10152	8.88657	4.09119	0.112216	0.808972	65
2000	1300	99.9975	285.495	-1.24066e+06	39.6215	150.072	2.45	55.6836	0.151332	17.088	1.06652	0.00460837	5.85991	0.14552	6.10152	8.88656	4.09119	0.112216	0.808972	65
2000	1299	99.9976	285.4	-1.24081e+06	39.6184	150.071	2.454	55.6836	0.151332	17.088	1.06679	0.00460837	5.85968	0.14552	6.10152	8.88656	4.09118	0.112216	0.808971	65
2000	1298	99.9976	285.304	-1.24096e+06	39.6153	150.071	2.459	55.6836	0.151332	17.088	1.06705	0.00460837	5.85943	0.14552	6.10152	8.88656	4.09118	0.112216	0.808971	65
2000	1297	99.9976	285.209	-1.24111e+06	39.6121	150.071	2.463	55.6836	0.151332	17.088	1.06732	0.00460836	5.85919	0.14552	6.10151	8.88656	4.09118	0.112216	0.808971	65
2000	1296	99.9976	285.113	-1.24127e+06	39.609	150.071	2.467	55.6836	0.151332	17.088	1.06759	0.00460836	5.85895	0.14552	6.10151	8.88655	4.09118	0.112216	0.808971	65
2000	1295	99.9977	285.018	-1.24142e+06	39.6059	150.07	2.472	55.6835	0.151332	17.088	1.06786	0.00460836	5.8587	0.14552	6.10151	8.88655	4.09118	0.112216	0.80897	65
2000	1294	99.9977	284.922	-1.24157e+06	39.6027	150.07	2.476	55.6835	0.151332	17.088	1.06813	0.00460836	5.85846	0.14552	6.10151	8.88655	4.09118	0.112216	0.80897	65
2000	1293	99.9977	284.826	-1.24172e+06	39.5996	150.07	2.48	55.6835	0.151332	17.088	1.0684	0.00460836	5.85821	0.14552	6.10151	8.88655	4.09118	0.112216	0.80897	65
2000	1292	99.9977	284.73	-1.24187e+06	39.5965	150.07	2.485	55.6835	0.151332	17.088	1.06868	0.00460836	5.85796	0.145519	6.10151	8.88654	4.09118	0.112216	0.80897	65
2000	1291	99.9978	284.635	-1.24202e+06	39.5934	150.069	2.489	55.6835	0.151332	17.088	1.06896	0.00460836	5.85771	0.145519	6.1015	8.88654	4.09118	0.112216	0.80897	65
2000	1290	99.9978	284.539	-1.24217e+06	39.5902	150.069	2.494	55.6835	0.151332	17.088	1.06923	0.00460836	5.85746	0.145519	6.1015	8.88654	4.09117	0.112216	0.808969	65
2000	1289	99.9978	284.443	-1.24232e+06	39.5871	150.069	2.498	55.6835	0.151332	17.088	1.06951	0.00460835	5.8572	0.145519	6.1015	8.88654	4.09117	0.112216	0.808969	65
2000	1288	99.9979	284.347	-1.24247e+06	39.584	150.069	2.503	55.6834	0.151332	17.088	1.0698	0.00460835	5.85695	0.145519	6.1015	8.88653	4.09117	0.112216	0.808969	65
2000	1287	99.9979	284.251	-1.24262e+06	39.5808	150.069	2.507	55.6834	0.151332	17.088	1.07008	0.00460835	5.85669	0.145519	6.1015	8.88653	4.09117	0.112216	0.808969	65
2000	1286	99.9979	284.154	-1.24277e+06	39.5777	150.068	2.511	55.6834	0.151332	17.088	1.07037	0.00460835	5.85643	0.145519	6.1015	8.88653	4.09117	0.112216	0.808968	65
2000	1285	99.9979	284.058	-1.24292e+06	39.5746	150.068	2.516	55.6834	0.151332	17.088	1.07065	0.00460835	5.85617	0.145519	6.10149	8.88653	4.09117	0.112216	0.808968	65
2000	1284	99.998	283.962	-1.24307e+06	39.5714	150.068	2.52	55.6834	0.151332	17.088	1.07094	0.00460835	5.85591	0.145519	6.10149	8.88652	4.09117	0.112216	0.808968	65
2000	1283	99.998	283.866	-1.24322e+06	39.5683	150.068	2.525	55.6834	0.151332	17.0879	1.07123	0.00460835	5.85565	0.145519	6.10149	8.88652	4.09117	0.112216	0.808968	65
2000	1282	99.998	283.769	-1.24337e+06	39.5652	150.067	2.529	55.6833	0.151332	17.0879	1.07152	0.00460834	5.85538	0.145519	6.10149	8.88652	4.09116	0.112216	0.808968	65
2000	1281	99.9981	283.673	-1.24352e+06	39.562	150.067	2.534	55.6833	0.151332	17.0879	1.07182	0.00460834	5.85511	0.145519	6.10149	8.88652	4.09116	0.112216	0.808967	65
2000	1280	99.9981	283.576	-1.24367e+06	39.5589	150.067	2.538	55.6833	0.151332	17.0879	1.07211	0.00460834	5.85485	0.145519	6.10149	8.88651	4.09116	0.112216	0.808967	65
2000	1279	99.9981	283.48	-1.24382e+06	39.5558	150.067	2.543	55.6833	0.151332	17.0879	1.07241	0.00460834	5.85458	0.145519	6.10148	8.88651	4.09116	0.112215	0.808967	65
2000	1278	99.9981	283.383	-1.24397e+06	39.5527	150.067	2.547	55.6833	0.151332	17.0879	1.07271	0.00460834	5.85431	0.145519	6.10148	8.88651	4.09116	0.112215	0.808967	65
2000	1277	99.9982	283.286	-1.24412e+06	39.5495	150.066	2.551	55.6833	0.151332	17.0879	1.07301	0.00460834	5.85403	0.145519	6.10148	8.88651	4.09116	0.112215	0.808966	65
2000	1276	99.9982	283.189	-1.24427e+06	39.5464	150.066	2.556	55.6832	0.151331	17.0879	1.07331	0.00460834	5.85376	0.145519	6.10148	8.8865	4.09116	0.112215	0.808966	65
2000	1275	99.9982	283.093	-1.24443e+06	39.5433	150.066	2.56	55.6832	0.151331	17.0879	1.07362	0.00460833	5.85348	0.145519	6.10148	8.8865	4.09116	0.112215	0.808966	65
2000	1274	99.9983	282.996	-1.24458e+06	39.5402	150.066	2.565	55.6832	0.151331	17.0879	1.07392	0.00460833	5.85321	0.145519	6.10147	8.8865	4.09115	0.112215	0.808966	65
2000	1273	99.9983	282.899	-1.24473e+06	39.537	150.065	2.569	55.6832	0.151331	17.0879	1.07423	0.00460833	5.85293	0.145519	6.10147	8.88649	4.09115	0.112215	0.808965	65
2000	1272	99.9983	282.802	-1.24488e+06	39.5339	150.065	2.574	55.6832	0.151331	17.0879	1.07454	0.00460833	5.85265	0.145519	6.10147	8.88649	4.09115	0.112215	0.808965	65
2000	1271	99.9984	282.705	-1.24503e+06	39.5308	150.065	2.578	55.6832	0.151331	17.0879	1.07485	0.00460833	5.85236	0.145519	6.10147	8.88649	4.09115	0.112215	0.808965	65
2000	1270	99.9984	282.607	-1.24518e+06	39.5277	150.065	2.583	55.6831	0.151331	17.0879	1.07517	0.00460833	5.85208	0.145519	6.10147	8.88649	4.09115	0.112215	0.808965	65
2000	1269	99.9984	282.51	-1.24533e+06	39.5245	150.065	2.587	55.6831	0.151331	17.0879	1.07548	0.00460833	5.85179	0.145518	6.10146	8.88648	4.09115	0.112215	0.808964	65
2000	1268	99.9985	282.413	-1.24548e+06	39.5214	150.064	2.592	55.6831	0.151331	17.0879	1.0758	0.00460832	5.85151	0.145518	6.10146	8.88648	4.09115	0.112215	0.808964	65
2000	1267	99.9985	282.316	-1.24563e+06	39.5183	150.064	2.597	55.6831	0.151331	17.0879	1.07612	0.00460832	5.85122	0.145518	6.10146	8.88648	4.09115	0.112215	0.808964	65
2000	1266	99.9985	282.218	-1.24578e+06	39.5152	150.064	2.601	55.6831	0.151331	17.0879	1.07644	0.00460832	5.85093	0.145518	6.10146	8.88648	4.09114	0.112215	0.808964	65
2000	1265	99.9986	282.121	-1.24593e+06	39.512	150.064	2.606	55.683	0.151331	17.0879	1.07676	0.00460832	5.85064	0.145518	6.10146	8.88647	4.09114	0.112215	0.808963	65
2000	1264	99.9986	282.023	-1.24608e+06	39.5089	150.064	2.61	55.683	0.151331	17.0878	1.07708	0.00460832	5.85034	0.145518	6.10145	8.88647	4.09114	0.112215	0.808963	65
2000	1263	99.9986	281.926	-1.24623e+06	39.5058	150.063	2.615	55.683	0.151331	17.0878	1.07741	0.00460832	5.85005	0.145518	6.10145	8.88647	4.09114	0.112215	0.808963	65
2000	1262	99.9987	281.828	-1.24638e+06	39.5027	150.063	2.619	55.683	0.151331	17.0878	1.07774	0.00460832	5.84975	0.145518	6.10145	8.88646	4.09114	0.112215	0.808962	65
2000	1261	99.9987	281.73	-1.24653e+06	39.4995	150.063	2.624	55.683	0.151331	17.0878	1.07806	0.00460831	5.84945	0.145518	6.10145	8.88646	4.09114	0.112215	0.808962	65
2000	1260	99.9987	281.633	-1.24668e+06	39.4964	150.063	2.628	55.683	0.151331	17.0878	1.0784	0.00460831	5.84915	0.145518	6.10145	8.88646	4.09114	0.112215	0.808962	65
2000	1259	99.9988	281.535	-1.24683e+06	39.4933	150.063	2.633	55.6829	0.151331	17.0878	1.07873	0.00460831	5.84885	0.145518	6.10144	8.88645	4.09113	0.112215	0.808962	65
2000	1258	99.9988	281.437	-1.24698e+06	39.4902	150.062	2.638	55.6829	0.151331	17.0878	1.07906	0.00460831	5.84854	0.145518	6.10144	8.88645	4.09113	0.112215	0.808961	65
2000	1257	99.9988	281.339	-1.24713e+06	39.4871	150.062	2.642	55.6829	0.151331	17.0878	1.0794	0.00460831	5.84824	0.145518	6.10144	8.88645	4.09113	0.112215	0.808961	65
2000	1256	99.9989	281.241	-1.24729e+06	39.4839	150.062	2.647	55.6829	0.15133	17.0878	1.07974	0.00460831	5.84793	0.145518	6.10144	8.88645	4.09113	0.112215	0.808961	65
2000	1255	99.9989	281.143	-1.24744e+06	39.4808	150.062	2.651	55.6829	0.15133	17.0878	1.08008	0.0046083	5.84762	0.145518	6.10144	8.88644	4.09113	0.112215	0.808961	65
2000	1254	99.9989	281.045	-1.24759e+06	39.4777	150.062	2.656	55.6828	0.15133	17.0878	1.08042	0.0046083	5.84731	0.145518	6.10143	8.88644	4.09113	0.112215	0.80896	65
2000	1253	99.999	280.946	-1.24774e+06	39.4746	150.061	2.661	55.6828	0.15133	17.0878	1.08077	0.0046083	5.847	0.145518	6.10143	8.88644	4.09113	0.112215	0.80896	65
2000	1252	99.999	280.848	-1.24789e+06	39.4715	150.061	2.665	55.6828	0.15133	17.0878	1.08111	0.0046083	5.84669	0.145518	6.10143	8.88643	4.09113	0.112214	0.80896	65
2000	1251	99.999	280.75	-1.24804e+06	39.4683	150.061	2.67	55.6828	0.15133	17.0878	1.08146	0.0046083	5.84637	0.145518	6.10143	8.88643	4.09112	0.112214	0.808959	65
2000	1250	99.9991	280.651	-1.24819e+06	39.4652	150.061	2.675	55.6828	0.15133	17.0878	1.08181	0.0046083	5.84605	0.145518	6.10143	8.88643	4.09112	0.112214	0.808959	65
2000	1249	99.9991	280.553	-1.24834e+06	39.4621	150.061	2.679	55.6827	0.15133	17.0878	1.08216	0.0046083	5.84574	0.145518	6.10142	8.88642	4.09112	0.112214	0.808959	65
2000	1248	99.9991	280.454	-1.24849e+06	39.459	150.061	2.684	55.6827	0.15133	17.0878	1.08252	0.00460829	5.84541	0.145517	6.10142	8.88642	4.09112	0.112214	0.808959	65
2000	1247	99.9992	280.356	-1.24864e+06	39.4559	150.06	2.689	55.6827	0.15133	17.0877	1.08287	0.00460829	5.84509	0.145517	6.10142	8.88642	4.09112	0.112214	0.808958	65
2000	1246	99.9992	280.257	-1.24879e+06	39.4528	150.06	2.693	55.6827	0.15133	17.0877	1.08323	0.00460829	5.84477	0.145517	6.10142	8.88641	4.09112	0.112214	0.808958	65
2000	1245	99.9992	280.158	-1.24894e+06	39.4496	150.06	2.698	55.6827	0.15133	17.0877	1.08359	0.00460829	5.84444	0.145517	6.10142	8.88641	4.09111	0.112214	0.808958	65
2000	1244	99.9993	280.059	-1.24909e+06	39.4465	150.06	2.703	55.6826	0.15133	17.0877	1.08395	0.00460829	5.84411	0.145517	6.10141	8.88641	4.09111	0.112214	0.808957	65
2000	1243	99.9993	279.96	-1.24924e+06	39.4434	150.06	2.707	55.6826	0.15133	17.0877	1.08431	0.00460829	5.84379	0.145517	6.10141	8.8864	4.09111	0.112214	0.808957	65
2000	1242	99.9993	279.862	-1.24939e+06	39.4403	150.059	2.712	55.6826	0.15133	17.0877	1.08468	0.00460828	5.84345	0.145517	6.10141	8.8864	4.09111	0.112214	0.808957	65
2000	1241	99.9994	279.763	-1.24954e+06	39.4372	150.059	2.717	55.6826	0.15133	17.0877	1.08505	0.00460828	5.84312	0.145517	6.10141	8.8864	4.09111	0.112214	0.808957	65
2000	1240	99.9994	279.663	-1.24969e+06	39.4341	150.059	2.721	55.6826	0.15133	17.0877	1.08541	0.00460828	5.84279	0.145517	6.1014	8.8864	4.09111	0.112214	0.808956	65
2000	1239	99.9995	279.564	-1.24985e+06	39.4309	150.059	2.726	55.6825	0.15133	17.0877	1.08579	0.00460828	5.84245	0.145517	6.1014	8.88639	4.09111	0.112214	0.808956	65.1
2000	1238	99.9995	279.465	-1.25e+06	39.4278	150.059	2.731	55.6825	0.15133	17.0877	1.08616	0.00460828	5.84211	0.145517	6.1014	8.88639	4.0911	0.112214	0.808956	65.1
2000	1237	99.9995	279.366	-1.25015e+06	39.4247	150.059	2.735	55.6825	0.151329	17.0877	1.08653	0.00460828	5.84177	0.145517	6.1014	8.88639	4.0911	0.112214	0.808955	65.1
2000	1236	99.9996	279.267	-1.2503e+06	39.4216	150.058	2.74	55.6825	0.151329	17.0877	1.08691	0.00460827	5.84143	0.145517	6.10139	8.88638	4.0911	0.112214	0.808955	65.1
2000	1235	99.9996	279.167	-1.25045e+06	39.4185	150.058	2.745	55.6825	0.151329	17.0877	1.08729	0.00460827	5.84109	0.145517	6.10139	8.88638	4.0911	0.112214	0.808955	65.1
2000	1234	99.9996	279.068	-1.2506e+06	39.4154	150.058	2.75	55.6824	0.151329	17.0877	1.08767	0.00460827	5.84074	0.145517	6.10139	8.88638	4.0911	0.112214	0.808954	65.1
2000	1233	99.9997	278.968	-1.25075e+06	39.4123	150.058	2.754	55.6824	0.151329	17.0877	1.08805	0.00460827	5.84039	0.145517	6.10139	8.88637	4.0911	0.112214	0.808954	65.1
2000	1232	99.9997	278.869	-1.2509e+06	39.4092	150.058	2.759	55.6824	0.151329	17.0877	1.08844	0.00460827	5.84004	0.145517	6.10139	8.88637	4.0911	0.112214	0.808954	65.1
2000	1231	99.9998	278.769	-1.25105e+06	39.406	150.058	2.764	55.6824	0.151329	17.0876	1.08883	0.00460826	5.83969	0.145517	6.10138	8.88636	4.09109	0.112214	0.808953	65.1
2000	1230	99.9998	278.669	-1.2512e+06	39.4029	150.057	2.769	55.6824	0.151329	17.0876	1.08922	0.00460826	5.83934	0.145516	6.10138	8.88636	4.09109	0.112214	0.808953	65.1
2000	1229	99.9998	278.569	-1.25135e+06	39.3998	150.057	2.773	55.6823	0.151329	17.0876	1.08961	0.00460826	5.83899	0.145516	6.10138	8.88636	4.09109	0.112214	0.808953	65.1
2000	1228	99.9999	278.47	-1.2515e+06	39.3967	150.057	2.778	55.6823	0.151329	17.0876	1.09	0.00460826	5.83863	0.145516	6.10138	8.88635	4.09109	0.112213	0.808953	65.1
2000	1227	99.9999	278.37	-1.25165e+06	39.3936	150.057	2.783	55.6823	0.151329	17.0876	1.09039	0.00460826	5.83827	0.145516	6.10137	8.88635	4.09109	0.112213	0.808952	65.1
2000	1226	100	278.27	-1.2518e+06	39.3905	150.057	2.788	55.6823	0.151329	17.0876	1.09079	0.00460826	5.83791	0.145516	6.10137	8.88635	4.09109	0.112213	0.808952	65.1
2000	1225	100	278.17	-1.25195e+06	39.3874	150.057	2.793	55.6822	0.151329	17.0876	1.09119	0.00460825	5.83755	0.145516	6.10137	8.88634	4.09108	0.112213	0.808952	65.1
2000	1224	100	278.07	-1.2521e+06	39.3843	150.056	2.797	55.6822	0.151329	17.0876	1.09159	0.00460825	5.83719	0.145516	6.10137	8.88634	4.09108	0.112213	0.808951	65.1
2000	1223	100	277.969	-1.25226e+06	39.3812	150.056	2.802	55.6822	0.151329	17.0876	1.092	0.00460825	5.83682	0.145516	6.10136	8.88634	4.09108	0.112213	0.808951	65.1
2000	1222	100	277.869	-1.25241e+06	39.3781	150.056	2.807	55.6822	0.151329	17.0876	1.0924	0.00460825	5.83645	0.145516	6.10136	8.88633	4.09108	0.112213	0.808951	65.1
2000	1221	100	277.769	-1.25256e+06	39.3749	150.056	2.812	55.6822	0.151328	17.0876	1.09281	0.00460825	5.83608	0.145516	6.10136	8.88633	4.09108	0.112213	0.80895	65.1
2000	1220	100	277.668	-1.25271e+06	39.3718	150.056	2.817	55.6821	0.151328	17.0876	1.09322	0.00460824	5.83571	0.145516	6.10136	8.88633	4.09108	0.112213	0.80895	65.1
2000	1219	100	277.568	-1.25286e+06	39.3687	150.056	2.821	55.6821	0.151328	17.0876	1.09363	0.00460824	5.83534	0.145516	6.10135	8.88632	4.09107	0.112213	0.80895	65.1
2000	1218	100	277.467	-1.25301e+06	39.3656	150.056	2.826	55.6821	0.151328	17.0876	1.09404	0.00460824	5.83496	0.145516	6.10135	8.88632	4.09107	0.112213	0.808949	65.1
2000	1217	100	277.367	-1.25316e+06	39.3625	150.055	2.831	55.6821	0.151328	17.0875	1.09446	0.00460824	5.83459	0.145516	6.10135	8.88631	4.09107	0.112213	0.808949	65.1
2000	1216	100	277.266	-1.25331e+06	39.3594	150.055	2.836	55.682	0.151328	17.0875	1.09488	0.00460824	5.83421	0.145516	6.10135	8.88631	4.09107	0.112213	0.808949	65.1
2000	1215	100	277.165	-1.25346e+06	39.3563	150.055	2.841	55.682	0.151328	17.0875	1.0953	0.00460823	5.83383	0.145516	6.10134	8.88631	4.09107	0.112213	0.808948	65.1
2000	1214	100	277.065	-1.25361e+06	39.3532	150.055	2.846	55.682	0.151328	17.0875	1.09572	0.00460823	5.83344	0.145516	6.10134	8.8863	4.09107	0.112213	0.808948	65.1
2000	1213	100	276.964	-1.25376e+06	39.3501	150.055	2.851	55.682	0.151328	17.0875	1.09614	0.00460823	5.83306	0.145515	6.10134	8.8863	4.09106	0.112213	0.808948	65.1
2000	1212	100.001	276.863	-1.25391e+06	39.347	150.055	2.855	55.6819	0.151328	17.0875	1.09657	0.00460823	5.83267	0.145515	6.10134	8.8863	4.09106	0.112213	0.808947	65.1
2000	1211	100.001	276.762	-1.25406e+06	39.3439	150.054	2.86	55.6819	0.151328	17.0875	1.097	0.00460823	5.83228	0.145515	6.10133	8.88629	4.09106	0.112213	0.808947	65.1
2000	1210	100.001	276.661	-1.25421e+06	39.3408	150.054	2.865	55.6819	0.151328	17.0875	1.09743	0.00460822	5.83189	0.145515	6.10133	8.88629	4.09106	0.112213	0.808946	65.1
2000	1209	100.001	276.56	-1.25436e+06	39.3377	150.054	2.87	55.6819	0.151328	17.0875	1.09786	0.00460822	5.8315	0.145515	6.10133	8.88628	4.09106	0.112213	0.808946	65.1
2000	1208	100.001	276.459	-1.25452e+06	39.3346	150.054	2.875	55.6818	0.151328	17.0875	1.0983	0.00460822	5.83111	0.145515	6.10133	8.88628	4.09105	0.112213	0.808946	65.1
2000	1207	100.001	276.357	-1.25467e+06	39.3315	150.054	2.88	55.6818	0.151328	17.0875	1.09873	0.00460822	5.83071	0.145515	6.10132	8.88628	4.09105	0.112213	0.808945	65.1
2000	1206	100.001	276.259	-1.25481e+06	39.3284	145.406	2.885	55.6818	0.151328	17.0875	1.09917	0.00460822	5.83031	0.145515	6.10132	8.88627	4.09105	0.112212	0.808945	65.1
2000	1205	100.001	276.16	-1.25496e+06	39.3253	145.405	2.89	55.6818	0.151327	17.0875	1.09962	0.00460821	5.82991	0.145515	6.10132	8.88627	4.09105	0.112212	0.808945	65.1
2000	1204	100.001	276.062	-1.2551e+06	39.3222	145.404	2.895	55.6817	0.151327	17.0875	1.10006	0.00460821	5.82951	0.145515	6.10131	8.88626	4.09105	0.112212	0.808944	65.1
2000	1203	100.001	275.964	-1.25525e+06	39.3191	145.402	2.9	55.6817	0.151327	17.0874	1.10051	0.00460821	5.8291	0.145515	6.10131	8.88626	4.09105	0.112212	0.808944	65.1
2000	1202	100.001	275.865	-1.2554e+06	39.316	145.401	2.905	55.6817	0.151327	17.0874	1.10095	0.00460821	5.8287	0.145515	6.10131	8.88626	4.09104	0.112212	0.808944	65.1
2000	1201	100.001	275.767	-1.25554e+06	39.3129	145.4	2.91	55.6817	0.151327	17.0874	1.1014	0.00460821	5.82829	0.145515	6.10131	8.88625	4.09104	0.112212	0.808943	65.1
2000	1200	100.001	275.668	-1.25569e+06	39.3098	145.399	2.915	55.6816	0.151327	17.0874	1.10186	0.0046082	5.82788	0.145515	6.1013	8.88625	4.09104	0.112212	0.808943	65.1
2000	1199	100.001	275.569	-1.25584e+06	39.3067	145.397	2.919	55.6816	0.151327	17.0874	1.10231	0.0046082	5.82747	0.145515	6.1013	8.88624	4.09104	0.112212	0.808943	65.1
2000	1198	100.001	275.471	-1.25598e+06	39.3036	145.396	2.924	55.6816	0.151327	17.0874	1.10277	0.0046082	5.82705	0.145515	6.1013	8.88624	4.09104	0.112212	0.808942	65.1
2000	1197	100.001	275.372	-1.25613e+06	39.3005	145.395	2.929	55.6816	0.151327	17.0874	1.10323	0.0046082	5.82664	0.145514	6.10129	8.88624	4.09103	0.112212	0.808942	65.1
2000	1196	100.001	275.273	-1.25627e+06	39.2974	145.394	2.934	55.6815	0.151327	17.0874	1.10369	0.0046082	5.82622	0.145514	6.10129	8.88623	4.09103	0.112212	0.808941	65.1
2000	1195	100.001	275.174	-1.25642e+06	39.2943	145.392	2.939	55.6815	0.151327	17.0874	1.10415	0.00460819	5.8258	0.145514	6.10129	8.88623	4.09103	0.112212	0.808941	65.1
2000	1194	100.001	275.075	-1.25657e+06	39.2912	145.391	2.944	55.6815	0.151327	17.0874	1.10462	0.00460819	5.82537	0.145514	6.10129	8.88622	4.09103	0.112212	0.808941	65.1
2000	1193	100.001	274.976	-1.25671e+06	39.2881	145.39	2.949	55.6815	0.151327	17.0874	1.10509	0.00460819	5.82495	0.145514	6.10128	8.88622	4.09103	0.112212	0.80894	65.1
2000	1192	100.001	274.877	-1.25686e+06	39.285	145.388	2.954	55.6814	0.151327	17.0874	1.10556	0.00460819	5.82452	0.145514	6.10128	8.88622	4.09102	0.112212	0.80894	65.1
2000	1191	100.001	274.778	-1.257e+06	39.2819	145.387	2.959	55.6814	0.151326	17.0873	1.10603	0.00460818	5.82409	0.145514	6.10128	8.88621	4.09102	0.112212	0.80894	65.1
2000	1190	100.002	274.679	-1.25715e+06	39.2788	145.386	2.964	55.6814	0.151326	17.0873	1.10651	0.00460818	5.82366	0.145514	6.10127	8.88621	4.09102	0.112212	0.808939	65.1
2000	1189	100.002	274.579	-1.2573e+06	39.2757	145.385	2.97	55.6814	0.151326	17.0873	1.10698	0.00460818	5.82323	0.145514	6.10127	8.8862	4.09102	0.112212	0.808939	65.1
2000	1188	100.002	274.48	-1.25744e+06	39.2726	145.383	2.975	55.6813	0.151326	17.0873	1.10746	0.00460818	5.8228	0.145514	6.10127	8.8862	4.09102	0.112212	0.808938	65.1
2000	1187	100.002	274.38	-1.25759e+06	39.2695	145.382	2.98	55.6813	0.151326	17.0873	1.10795	0.00460818	5.82236	0.145514	6.10127	8.88619	4.09102	0.112211	0.808938	65.1
2000	1186	100.002	274.281	-1.25773e+06	39.2664	145.381	2.985	55.6813	0.151326	17.0873	1.10843	0.00460817	5.82192	0.145514	6.10126	8.88619	4.09101	0.112211	0.808938	65.1
2000	1185	100.002	274.181	-1.25788e+06	39.2633	145.379	2.99	55.6813	0.151326	17.0873	1.10892	0.00460817	5.82148	0.145514	6.10126	8.88619	4.09101	0.112211	0.808937	65.1
2000	1184	100.002	274.082	-1.25803e+06	39.2602	145.378	2.995	55.6812	0.151326	17.0873	1.10941	0.00460817	5.82103	0.145514	6.10126	8.88618	4.09101	0.112211	0.808937	65.1
2000	1183	100.002	273.982	-1.25817e+06	39.2571	145.376	3	55.6812	0.151326	17.0873	1.1099	0.00460817	5.82059	0.145513	6.10125	8.88618	4.09101	0.112211	0.808936	65.1
2000	1182	99.7791	273.288	-1.25555e+06	39.1741	145.017	3.009	55.6824	0.151631	17.1202	1.10987	0.00461846	5.81254	0.145838	6.04822	8.90137	4.10009	0.112462	0.810742	65
2000	1181	99.6499	272.844	-1.2541e+06	39.1247	144.807	3.017	55.6832	0.151809	17.1393	1.11005	0.00462444	5.80763	0.146027	6.01741	8.91019	4.10537	0.112608	0.811793	64.9
2000	1180	99.5213	272.401	-1.25265e+06	39.0755	144.599	3.025	55.6839	0.151986	17.1584	1.11023	0.00463042	5.80269	0.146216	5.98668	8.91898	4.11064	0.112753	0.812843	64.8
2000	1179	99.3931	271.96	-1.2512e+06	39.0264	144.392	3.033	55.6847	0.152163	17.1775	1.1104	0.00463639	5.79772	0.146405	5.95604	8.92773	4.11591	0.112899	0.813891	64.7
2000	1178	98.2323	268.773	-1.23615e+06	38.5826	142.639	3.038	55.7303	0.153904	17.118	1.11816	0.00469118	5.83004	0.148135	5.91164	8.90898	4.13856	0.114124	0.823508	64.4
2000	1177	97.1699	265.85	-1.22239e+06	38.1763	141.035	3.044	55.7725	0.155533	17.0642	1.12535	0.00474247	5.8595	0.149754	5.86852	8.89228	4.15985	0.11527	0.832513	64.1
2000	1176	96.1304	262.989	-1.20893e+06	37.7788	139.466	3.05	55.8145	0.157162	17.0106	1.13252	0.00479375	5.88876	0.151374	5.82568	8.87568	4.18103	0.116415	0.841515	63.8
2000	1175	95.1131	260.19	-1.19576e+06	37.3897	137.93	3.055	55.8563	0.15879	16.9571	1.13968	0.00484503	5.91781	0.152993	5.78312	8.85916	4.20209	0.117559	0.850516	63.5
2000	1174	94.1172	257.449	-1.18287e+06	37.0088	136.428	3.061	55.898	0.160418	16.9038	1.14681	0.00489629	5.94667	0.154612	5.74084	8.84274	4.22303	0.1187	0.859515	63.2
2000	1173	93.1423	254.765	-1.17026e+06	36.6358	134.957	3.067	55.9394	0.162046	16.8506	1.15392	0.00494754	5.97534	0.15623	5.69882	8.8264	4.24386	0.119841	0.868512	63
2000	1172	92.1875	252.137	-1.1579e+06	36.2706	133.517	3.072	55.9807	0.163673	16.7976	1.16101	0.00499879	6.00381	0.157848	5.65708	8.81015	4.26458	0.120979	0.877507	62.7
2000	1171	91.2523	249.563	-1.14581e+06	35.9128	132.106	3.078	56.0219	0.1653	16.7448	1.16808	0.00505002	6.03209	0.159466	5.6156	8.79398	4.28519	0.122116	0.8865	62.4
2000	1170	90.336	247.041	-1.13396e+06	35.5622	130.725	3.083	56.0628	0.166926	16.6921	1.17513	0.00510124	6.06019	0.161083	5.57439	8.7779	4.30568	0.123251	0.895492	62.1
2000	1169	89.308	244.233	-1.12082e+06	35.1738	129.167	3.092	56.1126	0.168592	16.6813	1.1804	0.00515996	6.08883	0.162938	5.51923	8.71579	4.33477	0.124581	0.9058	61.8
2000	1168	88.3456	241.597	-1.10848e+06	34.8088	127.712	3.1	56.1592	0.17024	16.6568	1.18621	0.00521617	6.11704	0.164712	5.46921	8.66905	4.3608	0.125844	0.915667	61.4
2000	1167	87.4049	239.021	-1.09642e+06	34.4519	126.29	3.108	56.2056	0.171885	16.6321	1.192	0.0052723	6.14505	0.166485	5.41966	8.62265	4.38664	0.127103	0.925521	61.1
2000	1166	86.4852	236.502	-1.08463e+06	34.1029	124.899	3.116	56.2518	0.173525	16.6073	1.19776	0.00532837	6.17286	0.168256	5.37058	8.57659	4.41228	0.12836	0.935364	60.8
2000	1165	85.5857	234.038	-1.0731e+06	33.7615	123.54	3.123	56.2977	0.175162	16.5824	1.20349	0.00538437	6.20048	0.170024	5.32195	8.53087	4.43774	0.129614	0.945195	60.5
2000	1164	84.7058	231.627	-1.06182e+06	33.4275	122.211	3.131	56.3434	0.176795	16.5573	1.2092	0.00544031	6.2279	0.17179	5.27378	8.48548	4.463	0.130865	0.955014	60.1
2000	1163	83.8448	229.267	-1.05079e+06	33.1006	120.911	3.139	56.3889	0.178423	16.5321	1.21489	0.00549617	6.25514	0.173554	5.22606	8.44041	4.48807	0.132113	0.964821	59.8
2000	1162	83.0021	226.958	-1.04e+06	32.7806	119.638	3.146	56.4342	0.180049	16.5067	1.22055	0.00555197	6.28219	0.175316	5.17879	8.39568	4.51296	0.133358	0.974616	59.5
2000	1161	82.1771	224.697	-1.02943e+06	32.4672	118.393	3.154	56.4792	0.18167	16.4813	1.22619	0.00560771	6.30906	0.177076	5.13195	8.35127	4.53766	0.1346	0.9844	59.2
2000	1160	81.3504	222.434	-1.01889e+06	32.154	117.148	3.161	56.5267	0.183326	16.4567	1.23111	0.0056647	6.33141	0.178876	5.08568	8.30714	4.56305	0.13587	0.994404	58.9
2000	1159	80.5321	220.194	-1.00846e+06	31.8439	115.917	3.169	56.5744	0.185003	16.4311	1.23605	0.00572225	6.35344	0.180693	5.03896	8.26454	4.58846	0.137151	1.00451	58.6
2000	1158	79.731	218.002	-998242	31.5403	114.711	3.177	56.6218	0.186677	16.4053	1.24098	0.00577975	6.37529	0.182509	4.99267	8.22223	4.61368	0.138429	1.0146	58.3
2000	1157	78.9465	215.854	-988242	31.2429	113.531	3.184	56.6691	0.188347	16.3794	1.24589	0.00583718	6.39697	0.184322	4.94683	8.18022	4.63873	0.139705	1.02468	57.9
2000	1156	78.1781	213.75	-978449	30.9515	112.376	3.192	56.7161	0.190013	16.3534	1.25077	0.00589456	6.41848	0.186134	4.90141	8.13849	4.66359	0.140977	1.03475	57.6
2000	1155	77.4252	211.689	-968855	30.666	111.244	3.199	56.7629	0.191676	16.3272	1.25564	0.00595188	6.43983	0.187944	4.85641	8.09706	4.68828	0.142247	1.04482	57.3
2000	1154	76.6875	209.668	-959455	30.3862	110.135	3.206	56.8095	0.193336	16.3009	1.26049	0.00600913	6.46102	0.189752	4.81183	8.0559	4.7128	0.143514	1.05487	57
2000	1153	75.9644	207.688	-950243	30.1119	109.048	3.214	56.8559	0.194992	16.2745	1.26532	0.00606633	6.48205	0.191558	4.76767	8.01504	4.73714	0.144778	1.06491	56.7
2000	1152	75.2555	205.746	-941213	29.8429	107.983	3.221	56.9022	0.196645	16.248	1.27013	0.00612348	6.50292	0.193363	4.72392	7.97445	4.7613	0.14604	1.07494	56.4
2000	1151	74.5604	203.842	-932360	29.5791	106.94	3.228	56.9482	0.198294	16.2214	1.27492	0.00618056	6.52364	0.195166	4.68057	7.93413	4.7853	0.147299	1.08496	56.1
2000	1150	73.8787	201.974	-923679	29.3203	105.916	3.236	56.994	0.19994	16.1946	1.2797	0.00623759	6.54421	0.196966	4.63763	7.8941	4.80913	0.148555	1.09497	55.8
2000	1149	73.21	200.141	-915165	29.0664	104.913	3.243	57.0396	0.201583	16.1677	1.28446	0.00629457	6.56462	0.198766	4.59508	7.85433	4.83279	0.149809	1.10497	55.5
2000	1148	72.5539	198.343	-906812	28.8172	103.928	3.25	57.085	0.203222	16.1407	1.2892	0.00635149	6.58489	0.200563	4.55292	7.81484	4.85629	0.15106	1.11497	55.2
2000	1147	71.9101	196.578	-898616	28.5727	102.963	3.257	57.1302	0.204859	16.1136	1.29393	0.00640836	6.60502	0.202359	4.51114	7.77561	4.87962	0.152308	1.12495	54.9
2000	1146	71.2782	194.845	-890574	28.3326	102.015	3.264	57.1752	0.206492	16.0864	1.29864	0.00646517	6.625	0.204153	4.46975	7.73664	4.90278	0.153554	1.13492	54.6
2000	1145	70.6578	193.145	-882679	28.0969	101.085	3.271	57.22	0.208123	16.0591	1.30334	0.00652193	6.64484	0.205945	4.42874	7.69794	4.92579	0.154797	1.14489	54.3
2000	1144	70.0488	191.474	-874929	27.8654	100.172	3.278	57.2646	0.20975	16.0317	1.30802	0.00657864	6.66454	0.207736	4.38811	7.6595	4.94863	0.156037	1.15484	54
2000	1143	69.4506	189.834	-867319	27.638	99.2764	3.285	57.309	0.211374	16.0041	1.31269	0.00663529	6.6841	0.209525	4.34784	7.62131	4.97132	0.157275	1.16479	53.7
2000	1142	68.8632	188.222	-859846	27.4147	98.3966	3.291	57.3532	0.212996	15.9765	1.31734	0.0066919	6.70353	0.211312	4.30794	7.58338	4.99384	0.158511	1.17472	53.4
2000	1141	68.2861	186.639	-852505	27.1952	97.5325	3.298	57.3973	0.214614	15.9487	1.32198	0.00674845	6.72282	0.213098	4.2684	7.5457	5.01621	0.159744	1.18465	53.1
2000	1140	67.719	185.083	-845294	26.9795	96.6838	3.305	57.4411	0.21623	15.9209	1.32661	0.00680496	6.74198	0.214882	4.22922	7.50828	5.03843	0.160974	1.19457	52.8
2000	1139	67.1618	183.554	-838208	26.7675	95.85	3.312	57.4848	0.217843	15.8929	1.33122	0.00686142	6.76102	0.216665	4.19039	7.4711	5.06049	0.162202	1.20448	52.5
2000	1138	66.6142	182.051	-831245	26.5591	95.0307	3.318	57.5283	0.219453	15.8649	1.33583	0.00691783	6.77992	0.218446	4.15191	7.43416	5.0824	0.163428	1.21438	52.2
2000	1137	66.0758	180.573	-824401	26.3542	94.2256	3.325	57.5716	0.22106	15.8367	1.34041	0.00697419	6.7987	0.220226	4.11378	7.39748	5.10415	0.164651	1.22428	51.9
2000	1136	65.5465	179.12	-817673	26.1527	93.4343	3.331	57.6147	0.222665	15.8085	1.34499	0.00703051	6.81736	0.222004	4.07599	7.36103	5.12576	0.165872	1.23416	51.6
2000	1135	65.0261	177.691	-811058	25.9545	92.6564	3.338	57.6576	0.224267	15.7801	1.34955	0.00708678	6.83589	0.223781	4.03854	7.32482	5.14722	0.16709	1.24404	51.3
2000	1134	64.5142	176.285	-804553	25.7595	91.8916	3.344	57.7003	0.225866	15.7517	1.35411	0.00714301	6.8543	0.225557	4.00143	7.28885	5.16853	0.168306	1.25391	51
2000	1133	64.0107	174.902	-798156	25.5677	91.1396	3.351	57.7429	0.227463	15.7231	1.35865	0.00719919	6.87259	0.227331	3.96464	7.25312	5.18969	0.169519	1.26377	50.7
2000	1132	63.5155	173.542	-791863	25.379	90.4	3.357	57.7853	0.229058	15.6945	1.36318	0.00725533	6.89077	0.229104	3.92818	7.21761	5.21071	0.17073	1.27363	50.4
2000	1131	63.0281	172.203	-785672	25.1933	89.6725	3.363	57.8275	0.230649	15.6658	1.3677	0.00731142	6.90882	0.230875	3.89205	7.18234	5.23158	0.171939	1.28348	50.1
2000	1130	62.5486	170.885	-779581	25.0104	88.9568	3.37	57.8695	0.232239	15.637	1.37221	0.00736748	6.92677	0.232645	3.85624	7.1473	5.25231	0.173146	1.29332	49.8
2000	1129	62.0767	169.589	-773587	24.8305	88.2527	3.376	57.9113	0.233826	15.6081	1.37671	0.00742349	6.9446	0.234414	3.82074	7.11249	5.2729	0.17435	1.30315	49.5
2000	1128	61.6121	168.312	-767688	24.6533	87.5598	3.382	57.953	0.235411	15.5791	1.3812	0.00747946	6.96231	0.236181	3.78556	7.0779	5.29335	0.175552	1.31298	49.2
2000	1127	61.1548	167.055	-761881	24.4789	86.8779	3.388	57.9945	0.236993	15.55	1.38568	0.00753539	6.97992	0.237947	3.75068	7.04353	5.31366	0.176751	1.32279	48.9
2000	1126	60.7045	165.817	-756164	24.3071	86.2066	3.394	58.0358	0.238574	15.5208	1.39015	0.00759129	6.99742	0.239712	3.71612	7.00939	5.33383	0.177948	1.33261	48.6
2000	1125	60.2611	164.598	-750535	24.1378	85.5459	3.4	58.077	0.240152	15.4916	1.39461	0.00764714	7.01481	0.241476	3.68185	6.97546	5.35386	0.179144	1.34241	48.3
2000	1124	59.8244	163.397	-744992	23.9711	84.8953	3.406	58.118	0.241727	15.4623	1.39907	0.00770296	7.03209	0.243239	3.64789	6.94176	5.37376	0.180336	1.35221	48
2000	1123	59.3943	162.214	-739534	23.8069	84.2547	3.412	58.1588	0.243301	15.4329	1.40351	0.00775875	7.04926	0.245	3.61422	6.90826	5.39352	0.181527	1.362	47.7
2000	1122	58.9706	161.048	-734157	23.6451	83.6239	3.418	58.1994	0.244873	15.4034	1.40795	0.00781449	7.06634	0.246761	3.58085	6.87499	5.41315	0.182716	1.37179	47.4
2000	1121	58.5532	159.9	-728860	23.4856	83.0025	3.424	58.2399	0.246442	15.3738	1.41238	0.0078702	7.08331	0.24852	3.54777	6.84192	5.43265	0.183902	1.38157	47.2
2000	1120	58.1418	158.768	-723642	23.3285	82.3904	3.43	58.2802	0.24801	15.3442	1.4168	0.00792588	7.10017	0.250278	3.51498	6.80906	5.45201	0.185086	1.39134	46.9
2000	1119	57.7365	157.653	-718499	23.1736	81.7874	3.436	58.3203	0.249575	15.3144	1.42121	0.00798153	7.11694	0.252035	3.48247	6.77641	5.47125	0.186268	1.40111	46.6
2000	1118	57.337	156.553	-713432	23.0209	81.1933	3.441	58.3603	0.251139	15.2846	1.42561	0.00803714	7.13361	0.253791	3.45024	6.74397	5.49035	0.187448	1.41087	46.3
2000	1117	56.9432	155.469	-708438	22.8703	80.6078	3.447	58.4001	0.2527	15.2548	1.43001	0.00809272	7.15018	0.255546	3.41829	6.71174	5.50933	0.188626	1.42063	46
2000	1116	56.555	154.4	-703515	22.7219	80.0308	3.453	58.4398	0.25426	15.2248	1.4344	0.00814827	7.16665	0.2573	3.38661	6.6797	5.52817	0.189802	1.43038	45.7
2000	1115	56.1723	153.347	-698662	22.5754	79.4621	3.458	58.4792	0.255818	15.1948	1.43878	0.00820379	7.18302	0.259053	3.35521	6.64787	5.5469	0.190975	1.44013	45.4
2000	1114	55.7949	152.307	-693878	22.4311	78.9016	3.464	58.5186	0.257374	15.1647	1.44316	0.00825927	7.1993	0.260806	3.32408	6.61624	5.56549	0.192147	1.44987	45.1
2000	1113	55.4227	151.283	-689160	22.2886	78.3489	3.469	58.5577	0.258928	15.1345	1.44753	0.00831473	7.21549	0.262557	3.29321	6.5848	5.58396	0.193317	1.4596	44.8
2000	1112	55.0557	150.272	-684507	22.1481	77.804	3.475	58.5968	0.260481	15.1043	1.45189	0.00837017	7.23158	0.264307	3.26261	6.55357	5.60231	0.194484	1.46933	44.6
2000	1111	54.6937	149.274	-679919	22.0095	77.2667	3.48	58.6356	0.262031	15.074	1.45625	0.00842557	7.24758	0.266057	3.23227	6.52252	5.62054	0.19565	1.47906	44.3
2000	1110	54.3365	148.29	-675393	21.8727	76.7368	3.486	58.6743	0.263581	15.0436	1.4606	0.00848095	7.26348	0.267806	3.20219	6.49167	5.63864	0.196813	1.48878	44
2000	1109	53.9842	147.319	-670929	21.7378	76.2141	3.491	58.7129	0.265128	15.0132	1.46495	0.0085363	7.2793	0.269553	3.17236	6.46101	5.65662	0.197975	1.4985	43.7
2000	1108	53.6365	146.361	-666524	21.6046	75.6986	3.497	58.7512	0.266674	14.9827	1.46929	0.00859163	7.29503	0.271301	3.14279	6.43054	5.67449	0.199135	1.50821	43.4
2000	1107	53.2935	145.416	-662178	21.4731	75.1901	3.502	58.7895	0.268218	14.9521	1.47362	0.00864694	7.31066	0.273047	3.11347	6.40026	5.69223	0.200292	1.51792	43.1
2000	1106	52.9549	144.482	-657890	21.3433	74.6883	3.507	58.8276	0.269761	14.9215	1.47795	0.00870222	7.32621	0.274793	3.0844	6.37017	5.70986	0.201448	1.52762	42.9
2000	1105	52.6208	143.561	-653658	21.2152	74.1933	3.512	58.8655	0.271303	14.8908	1.48227	0.00875748	7.34168	0.276537	3.05557	6.34026	5.72737	0.202602	1.53732	42.6
2000	1104	52.291	142.652	-649481	21.0887	73.7047	3.518	58.9033	0.272842	14.8601	1.48659	0.00881271	7.35705	0.278282	3.02698	6.31054	5.74476	0.203754	1.54702	42.3
2000	1103	51.9654	141.754	-645359	20.9638	73.2226	3.523	58.9409	0.274381	14.8293	1.4909	0.00886793	7.37234	0.280025	2.99864	6.28099	5.76204	0.204904	1.55671	42
2000	1102	51.644	140.867	-641289	20.8405	72.7468	3.528	58.9784	0.275918	14.7984	1.49521	0.00892312	7.38755	0.281768	2.97053	6.25163	5.77921	0.206052	1.5664	41.7
2000	1101	51.3266	139.992	-637271	20.7187	72.2771	3.533	59.0158	0.277453	14.7675	1.49952	0.0089783	7.40267	0.28351	2.94266	6.22245	5.79626	0.207198	1.57609	41.5
2000	1100	51.0132	139.127	-633304	20.5984	71.8135	3.538	59.053	0.278988	14.7365	1.50382	0.00903345	7.4177	0.285252	2.91502	6.19344	5.8132	0.208343	1.58577	41.2
2000	1099	50.7037	138.273	-629387	20.4795	71.3557	3.543	59.09	0.280521	14.7054	1.50811	0.00908859	7.43266	0.286993	2.88761	6.16461	5.83003	0.209486	1.59545	40.9
2000	1098	50.398	137.43	-625519	20.3621	70.9038	3.548	59.1269	0.282052	14.6743	1.5124	0.00914371	7.44753	0.288734	2.86043	6.13596	5.84675	0.210627	1.60512	40.6
2000	1097	50.0961	136.597	-621699	20.2461	70.4575	3.553	59.1637	0.283583	14.6432	1.51669	0.00919882	7.46232	0.290474	2.83348	6.10748	5.86335	0.211766	1.6148	40.3
2000	1096	49.7979	135.773	-617925	20.1316	70.0168	3.558	59.2003	0.285112	14.612	1.52097	0.00925391	7.47703	0.292213	2.80675	6.07917	5.87985	0.212903	1.62447	40.1
2000	1095	49.5033	134.96	-614198	20.0183	69.5816	3.562	59.2368	0.28664	14.5807	1.52525	0.00930898	7.49166	0.293952	2.78024	6.05103	5.89624	0.214038	1.63414	39.8
2000	1094	49.2122	134.156	-610516	19.9064	69.1517	3.567	59.2731	0.288167	14.5494	1.52953	0.00936404	7.50621	0.295691	2.75395	6.02307	5.91253	0.215172	1.6438	39.5
2000	1093	48.9246	133.362	-606879	19.7958	68.727	3.572	59.3093	0.289693	14.518	1.5338	0.00941909	7.52067	0.297429	2.72788	5.99527	5.92871	0.216304	1.65346	39.2
2000	1092	48.6404	132.578	-603285	19.6865	68.3075	3.577	59.3454	0.291218	14.4866	1.53807	0.00947412	7.53507	0.299167	2.70203	5.96763	5.94478	0.217434	1.66313	39
2000	1091	48.3596	131.802	-599733	19.5785	67.8931	3.581	59.3813	0.292741	14.4551	1.54233	0.00952914	7.54938	0.300904	2.67638	5.94016	5.96075	0.218563	1.67278	38.7
2000	1090	48.082	131.035	-596224	19.4717	67.4836	3.586	59.4171	0.294264	14.4236	1.5466	0.00958415	7.56361	0.302642	2.65095	5.91286	5.97661	0.21969	1.68244	38.4
2000	1089	47.8077	130.277	-592755	19.3661	67.079	3.591	59.4528	0.295785	14.3921	1.55086	0.00963915	7.57777	0.304378	2.62572	5.88572	5.99237	0.220815	1.6921	38.2
2000	1088	47.5365	129.528	-589327	19.2617	66.6792	3.595	59.4883	0.297306	14.3605	1.55511	0.00969414	7.59185	0.306115	2.60071	5.85874	6.00803	0.221939	1.70175	37.9
2000	1087	47.2684	128.787	-585939	19.1584	66.2841	3.6	59.5237	0.298826	14.3288	1.55936	0.00974911	7.60585	0.307851	2.57589	5.83192	6.02359	0.22306	1.7114	37.6
2000	1086	47.0034	128.055	-582589	19.0563	65.8935	3.604	59.559	0.300344	14.2971	1.56361	0.00980409	7.61978	0.309587	2.55128	5.80526	6.03905	0.224181	1.72105	37.4
2000	1085	46.7414	127.33	-579278	18.9554	65.5075	3.609	59.5941	0.301862	14.2654	1.56786	0.00985905	7.63364	0.311322	2.52687	5.77875	6.0544	0.225299	1.7307	37.1
2000	1084	46.4823	126.614	-576004	18.8555	65.1259	3.613	59.6291	0.303379	14.2336	1.57211	0.009914	7.64741	0.313057	2.50266	5.7524	6.06966	0.226416	1.74034	36.8
2000	1083	46.2261	125.906	-572767	18.7568	64.7487	3.618	59.664	0.304895	14.2017	1.57635	0.00996895	7.66112	0.314793	2.47864	5.72621	6.08482	0.227531	1.74999	36.6
2000	1082	45.9727	125.205	-569567	18.6591	64.3758	3.622	59.6987	0.30641	14.1699	1.58059	0.0100239	7.67475	0.316527	2.45482	5.70017	6.09989	0.228645	1.75964	36.3
2000	1081	45.7221	124.512	-566402	18.5624	64.007	3.626	59.7333	0.307925	14.1379	1.58482	0.0100788	7.6883	0.318262	2.43119	5.67429	6.11485	0.229757	1.76928	36
2000	1080	45.4742	123.827	-563271	18.4668	63.6424	3.631	59.7678	0.309438	14.106	1.58906	0.0101338	7.70178	0.319997	2.40775	5.64855	6.12972	0.230868	1.77892	35.8
2000	1079	45.2291	123.149	-560175	18.3722	63.2819	3.635	59.8022	0.310951	14.074	1.59329	0.0101887	7.71519	0.321731	2.38451	5.62297	6.1445	0.231977	1.78856	35.5
2000	1078	44.9866	122.478	-557113	18.2786	62.9253	3.639	59.8364	0.312464	14.0419	1.59752	0.0102436	7.72853	0.323466	2.36145	5.59754	6.15918	0.233084	1.79821	35.2
2000	1077	44.7466	121.814	-554084	18.186	62.5727	3.643	59.8705	0.313975	14.0099	1.60175	0.0102985	7.74179	0.3252	2.33857	5.57225	6.17376	0.23419	1.80785	35
2000	1076	44.5093	121.157	-551087	18.0944	62.2239	3.648	59.9045	0.315486	13.9777	1.60598	0.0103535	7.75498	0.326935	2.31588	5.54711	6.18825	0.235294	1.81749	34.7
2000	1075	44.2744	120.507	-548123	18.0036	61.8789	3.652	59.9384	0.316996	13.9456	1.6102	0.0104084	7.7681	0.328669	2.29337	5.52212	6.20266	0.236397	1.82713	34.5
2000	1074	44.042	119.864	-545190	17.9139	61.5376	3.656	59.9721	0.318506	13.9134	1.61442	0.0104633	7.78115	0.330403	2.27104	5.49727	6.21696	0.237498	1.83677	34.2
2000	1073	43.8121	119.228	-542288	17.825	61.1999	3.66	60.0057	0.320015	13.8812	1.61865	0.0105182	7.79412	0.332137	2.24888	5.47256	6.23118	0.238598	1.84641	33.9
2000	1072	43.5845	118.598	-539416	17.7371	60.8659	3.664	60.0393	0.321523	13.8489	1.62286	0.0105732	7.80703	0.333872	2.22691	5.448	6.24531	0.239696	1.85605	33.7
2000	1071	43.3592	117.974	-536574	17.65	60.5354	3.668	60.0727	0.323031	13.8166	1.62708	0.0106281	7.81986	0.335606	2.20511	5.42358	6.25935	0.240793	1.8657	33.4
2000	1070	43.1363	117.357	-533762	17.5638	60.2084	3.672	60.1059	0.324538	13.7843	1.6313	0.010683	7.83262	0.33734	2.18348	5.3993	6.2733	0.241889	1.87534	33.2
2000	1069	42.9156	116.746	-530979	17.4784	59.8848	3.676	60.1391	0.326045	13.7519	1.63551	0.0107379	7.84531	0.339075	2.16202	5.37515	6.28716	0.242982	1.88498	32.9
2000	1068	42.6972	116.141	-528224	17.3939	59.5645	3.68	60.1721	0.327551	13.7195	1.63972	0.0107929	7.85793	0.34081	2.14074	5.35115	6.30094	0.244075	1.89462	32.7
2000	1067	42.481	115.542	-525497	17.3102	59.2476	3.684	60.2051	0.329057	13.6871	1.64394	0.0108478	7.87048	0.342544	2.11962	5.32728	6.31463	0.245166	1.90427	32.4
2000	1066	42.2669	114.949	-522798	17.2274	58.9339	3.687	60.2379	0.330562	13.6547	1.64814	0.0109028	7.88296	0.344279	2.09867	5.30355	6.32823	0.246256	1.91391	32.2
2000	1065	42.0549	114.362	-520126	17.1453	58.6234	3.691	60.2706	0.332067	13.6222	1.65235	0.0109577	7.89537	0.346015	2.07789	5.27995	6.34174	0.247344	1.92356	31.9
2000	1064	41.8451	113.78	-517480	17.0641	58.316	3.695	60.3032	0.333572	13.5897	1.65656	0.0110127	7.90771	0.34775	2.05727	5.25649	6.35518	0.248431	1.93321	31.7
2000	1063	41.6373	113.205	-514861	16.9836	58.0118	3.699	60.3357	0.335076	13.5571	1.66077	0.0110676	7.91998	0.349485	2.03681	5.23316	6.36852	0.249516	1.94285	31.4
2000	1062	41.4315	112.634	-512268	16.9039	57.7106	3.703	60.368	0.336579	13.5245	1.66497	0.0111226	7.93218	0.351221	2.01651	5.20997	6.38179	0.2506	1.9525	31.2
2000	1061	41.2277	112.07	-509700	16.8249	57.4124	3.706	60.4003	0.338083	13.4919	1.66917	0.0111776	7.94431	0.352957	1.99637	5.1869	6.39497	0.251683	1.96215	30.9
2000	1060	41.0259	111.51	-507157	16.7467	57.1172	3.71	60.4324	0.339586	13.4593	1.67338	0.0112325	7.95637	0.354694	1.97639	5.16396	6.40807	0.252764	1.97181	30.7
2000	1059	40.826	110.956	-504638	16.6692	56.8248	3.713	60.4645	0.341089	13.4266	1.67758	0.0112875	7.96837	0.35643	1.95657	5.14115	6.42109	0.253844	1.98146	30.4
2000	1058	40.628	110.407	-502144	16.5924	56.5353	3.717	60.4964	0.342591	13.394	1.68178	0.0113426	7.98029	0.358167	1.9369	5.11847	6.43403	0.254922	1.99112	30.2
2000	1057	40.4319	109.863	-499674	16.5163	56.2487	3.721	60.5283	0.344093	13.3613	1.68597	0.0113976	7.99214	0.359904	1.91738	5.09592	6.44689	0.256	2.00078	29.9
2000	1056	40.2376	109.325	-497228	16.4409	55.9648	3.724	60.56	0.345595	13.3285	1.69017	0.0114526	8.00392	0.361642	1.89802	5.0735	6.45967	0.257075	2.01044	29.7
2000	1055	40.0452	108.791	-494804	16.3663	55.6837	3.728	60.5916	0.347097	13.2958	1.69437	0.0115076	8.01563	0.36338	1.8788	5.05119	6.47237	0.25815	2.0201	29.4
2000	1054	39.8545	108.262	-492404	16.2923	55.4052	3.731	60.6231	0.348598	13.263	1.69856	0.0115627	8.02728	0.365119	1.85974	5.02902	6.48499	0.259223	2.02976	29.2
2000	1053	39.6656	107.738	-490026	16.2189	55.1294	3.735	60.6546	0.3501	13.2302	1.70276	0.0116178	8.03885	0.366857	1.84082	5.00696	6.49753	0.260295	2.03943	29
2000	1052	39.4784	107.219	-487670	16.1462	54.8562	3.738	60.6859	0.351601	13.1974	1.70695	0.0116728	8.05035	0.368597	1.82205	4.98503	6.51	0.261366	2.0491	28.7
2000	1051	39.293	106.705	-485336	16.0742	54.5855	3.741	60.7171	0.353102	13.1645	1.71114	0.0117279	8.06179	0.370337	1.80343	4.96322	6.52239	0.262435	2.05877	28.5
2000	1050	39.1092	106.195	-483023	16.0028	54.3174	3.745	60.7482	0.354602	13.1317	1.71534	0.011783	8.07315	0.372077	1.78495	4.94153	6.53471	0.263504	2.06844	28.2
2000	1049	38.9271	105.689	-480731	15.932	54.0518	3.748	60.7793	0.356103	13.0988	1.71953	0.0118382	8.08444	0.373818	1.76661	4.91996	6.54695	0.264571	2.07812	28
2000	1048	38.7462	105.188	-478458	15.8618	53.7881	3.751	60.8106	0.357582	13.0659	1.72367	0.0117688	8.09538	0.375562	1.74838	4.8985	6.55917	0.265639	2.08782	27.8
2000	1047	38.5664	104.689	-476201	15.792	53.526	3.755	60.8426	0.359021	13.0331	1.72772	0.0114912	8.10576	0.377313	1.73024	4.87714	6.57141	0.266709	2.09756	27.5
2000	1046	38.3881	104.195	-473964	15.7228	53.2663	3.758	60.8744	0.360454	13.0002	1.73177	0.0112136	8.11602	0.379066	1.71223	4.8559	6.58358	0.267779	2.1073	27.3
2000	1045	38.2114	103.704	-471747	15.6542	53.0089	3.761	60.9063	0.361883	12.9674	1.73582	0.010936	8.1262	0.380818	1.69437	4.83477	6.59569	0.268848	2.11704	27.1
2000	1044	38.0363	103.219	-469550	15.5862	52.7538	3.765	60.938	0.363309	12.9345	1.73986	0.0106584	8.13629	0.382572	1.67664	4.81376	6.60772	0.269916	2.12679	26.8
2000	1043	37.8626	102.737	-467372	15.5187	52.5011	3.768	60.9697	0.364732	12.9016	1.74389	0.0103807	8.14628	0.384327	1.65905	4.79286	6.61968	0.270983	2.13654	26.6
2000	1042	37.6905	102.259	-465213	15.4518	52.2505	3.771	61.0013	0.366151	12.8686	1.74792	0.010103	8.15618	0.386082	1.64159	4.77208	6.63158	0.272048	2.1463	26.4
2000	1041	37.5198	101.786	-463073	15.3855	52.0021	3.775	61.0329	0.367566	12.8357	1.75195	0.00982519	8.16599	0.387839	1.62426	4.7514	6.64341	0.273113	2.15607	26.1
2000	1040	37.3505	101.316	-460951	15.3198	51.756	3.778	61.0644	0.368976	12.8028	1.75597	0.00954739	8.17571	0.389596	1.60707	4.73084	6.65517	0.274177	2.16584	25.9
2000	1039	37.1827	100.851	-458848	15.2545	51.512	3.781	61.0958	0.370382	12.7698	1.75998	0.00926957	8.18533	0.391354	1.59001	4.71039	6.66686	0.275239	2.17561	25.7
2000	1038	37.0163	100.389	-456763	15.1899	51.27	3.784	61.1271	0.371783	12.7368	1.76399	0.00899175	8.19485	0.393114	1.57308	4.69004	6.67849	0.276301	2.18539	25.5
2000	1037	36.8513	99.931	-454696	15.1257	51.0302	3.787	61.1585	0.37318	12.7038	1.76799	0.00871398	8.20428	0.394874	1.55628	4.66981	6.69006	0.277362	2.19518	25.2
2000	1036	36.6876	99.4768	-452646	15.0621	50.7924	3.79	61.1897	0.374571	12.6708	1.77199	0.00843629	8.2136	0.396636	1.53961	4.64968	6.70156	0.278422	2.20497	25
2000	1035	36.5253	99.0263	-450613	14.9989	50.5567	3.793	61.2209	0.375956	12.6378	1.77598	0.00815873	8.22282	0.398398	1.52306	4.62966	6.713	0.27948	2.21477	24.8
2000	1034	36.3643	98.5795	-448598	14.9363	50.3229	3.796	61.2521	0.377335	12.6048	1.77996	0.00788136	8.23194	0.400162	1.50665	4.60974	6.72437	0.280538	2.22457	24.6
2000	1033	36.2046	98.1363	-446599	14.8742	50.0911	3.799	61.2832	0.378708	12.5717	1.78394	0.00760426	8.24095	0.401927	1.49035	4.58993	6.73569	0.281596	2.23439	24.4
2000	1032	36.0462	97.6966	-444617	14.8125	49.8612	3.802	61.3142	0.380075	12.5387	1.7879	0.00732751	8.24986	0.403693	1.47418	4.57022	6.74694	0.282652	2.24421	24.1
2000	1031	35.8891	97.2604	-442651	14.7514	49.6332	3.805	61.3453	0.381434	12.5056	1.79186	0.00705121	8.25865	0.405461	1.45814	4.55062	6.75813	0.283707	2.25403	23.9
2000	1030	35.7332	96.8277	-440702	14.6907	49.4071	3.808	61.3763	0.382785	12.4726	1.79582	0.00677548	8.26734	0.407229	1.44221	4.53112	6.76927	0.284762	2.26386	23.7
2000	1029	35.5786	96.3984	-438768	14.6305	49.1829	3.811	61.4072	0.384129	12.4395	1.79976	0.00650044	8.27591	0.408999	1.42641	4.51172	6.78034	0.285816	2.2737	23.5
2000	1028	35.4251	95.9724	-436850	14.5708	48.9605	3.814	61.4381	0.385463	12.4064	1.8037	0.00622624	8.28437	0.410771	1.41073	4.49242	6.79136	0.286869	2.28355	23.3
2000	1027	35.2729	95.5497	-434947	14.5115	48.7398	3.817	61.469	0.386789	12.3733	1.80762	0.00595304	8.29271	0.412544	1.39517	4.47322	6.80232	0.287921	2.29341	23.1
2000	1026	35.1218	95.1302	-433060	14.4527	48.521	3.82	61.4999	0.388105	12.3402	1.81154	0.00568104	8.30093	0.414318	1.37972	4.45413	6.81322	0.288972	2.30327	22.8
2000	1025	34.9719	94.714	-431187	14.3943	48.3039	3.823	61.5308	0.389411	12.3071	1.81544	0.00541043	8.30903	0.416094	1.36439	4.43512	6.82407	0.290023	2.31315	22.6
2000	1024	34.8232	94.301	-429329	14.3364	48.0885	3.826	61.5616	0.390705	12.274	1.81934	0.00514143	8.31701	0.417872	1.34918	4.41622	6.83487	0.291073	2.32303	22.4
2000	1023	34.6755	93.891	-427486	14.2789	47.8748	3.829	61.5924	0.391989	12.2408	1.82322	0.0048743	8.32485	0.419651	1.33409	4.39741	6.84561	0.292123	2.33292	22.2
2000	1022	34.529	93.4841	-425657	14.2218	47.6627	3.831	61.6232	0.39326	12.2077	1.8271	0.00460931	8.33257	0.421432	1.31911	4.3787	6.85629	0.293172	2.34282	22
2000	1021	34.3835	93.0802	-423843	14.1651	47.4523	3.834	61.654	0.394517	12.1746	1.83096	0.00434674	8.34016	0.423215	1.30425	4.36009	6.86693	0.29422	2.35273	21.8
2000	1020	34.2392	92.6793	-422042	14.1089	47.2435	3.837	61.6848	0.395761	12.1414	1.83481	0.00408693	8.34761	0.424999	1.2895	4.34156	6.87751	0.295268	2.36265	21.6
2000	1019	34.0958	92.2813	-420255	14.053	47.0363	3.84	61.7156	0.396991	12.1083	1.83864	0.00383021	8.35493	0.426786	1.27486	4.32314	6.88805	0.296315	2.37258	21.4
2000	1018	33.9536	91.8862	-418482	13.9976	46.8307	3.842	61.7464	0.398205	12.0751	1.84246	0.00357697	8.3621	0.428574	1.26033	4.3048	6.89853	0.297362	2.38252	21.2
2000	1017	33.8123	91.494	-416722	13.9425	46.6266	3.845	61.7772	0.399402	12.042	1.84627	0.0033276	8.36913	0.430365	1.24592	4.28656	6.90896	0.298408	2.39248	21
2000	1016	33.6721	91.1045	-414975	13.8879	46.424	3.848	61.8081	0.400582	12.0088	1.85007	0.00308254	8.37601	0.432157	1.23162	4.26841	6.91935	0.299454	2.40244	20.8
2000	1015	33.5328	90.7178	-413241	13.8336	46.2229	3.85	61.8389	0.401743	11.9756	1.85384	0.00284225	8.38274	0.433952	1.21743	4.25034	6.92969	0.3005	2.41242	20.6
2000	1014	33.3945	90.3339	-411520	13.7797	46.0233	3.853	61.8698	0.402884	11.9424	1.85761	0.00260721	8.38932	0.435749	1.20334	4.23237	6.93998	0.301545	2.42241	20.4
2000	1013	33.2572	89.9526	-409812	13.7262	45.8252	3.856	61.9007	0.404005	11.9092	1.86135	0.00237797	8.39574	0.437548	1.18937	4.21449	6.95023	0.30259	2.43241	20.2
2000	1012	33.1209	89.574	-408116	13.673	45.6284	3.858	61.9316	0.405103	11.876	1.86508	0.00215505	8.40199	0.439349	1.1755	4.19669	6.96043	0.303634	2.44242	20
2000	1011	32.9854	89.1979	-406432	13.6203	45.4331	3.861	61.9626	0.406178	11.8428	1.86879	0.00193906	8.40808	0.441153	1.16174	4.17898	6.97059	0.304678	2.45245	19.8
2000	1010	32.8509	88.8244	-404760	13.5678	45.2392	3.863	61.9936	0.407228	11.8096	1.87248	0.0017306	8.414	0.442959	1.14809	4.16136	6.98071	0.305722	2.46249	19.6
2000	1009	32.7173	88.4535	-403101	13.5158	45.0466	3.866	62.0247	0.408252	11.7764	1.87615	0.00153032	8.41974	0.444768	1.13455	4.14383	6.99078	0.306766	2.47255	19.4
2000	1008	32.5846	88.085	-401453	13.464	44.8554	3.868	62.0558	0.409248	11.7432	1.8798	0.00133889	8.4253	0.446579	1.12111	4.12638	7.00082	0.30781	2.48262	19.2
2000	1007	32.4528	87.7189	-399817	13.4127	44.6655	3.871	62.087	0.410214	11.71	1.88343	0.00115701	8.43067	0.448393	1.10778	4.10901	7.01081	0.308854	2.4927	19
2000	1006	32.3218	87.3553	-398192	13.3616	44.4769	3.874	62.1182	0.411148	11.6768	1.88703	0.000985416	8.43585	0.450211	1.09455	4.09173	7.02077	0.309898	2.5028	18.8
2000	1005	32.1917	86.994	-396578	13.3109	44.2896	3.876	62.1496	0.412048	11.6436	1.89061	0.000824859	8.44083	0.452031	1.08143	4.07453	7.03069	0.310941	2.51292	18.6
2000	1004	32.0624	86.635	-394976	13.2605	44.1035	3.878	62.181	0.412911	11.6103	1.89416	0.000676118	8.4456	0.453854	1.06841	4.05741	7.04057	0.311985	2.52306	18.4
2000	1003	31.9338	86.2783	-393384	13.2104	43.9187	3.881	62.2126	0.413733	11.5771	1.89769	0.000539992	8.45015	0.45568	1.0555	4.04038	7.05042	0.31303	2.53321	18.2
2000	1002	31.8061	85.9238	-391803	13.1607	43.735	3.883	62.2443	0.414512	11.5438	1.90118	0.000417299	8.45446	0.45751	1.04269	4.02342	7.06024	0.314074	2.54338	18
2000	1001	31.6791	85.5714	-390232	13.1112	43.5525	3.886	62.2761	0.41524	11.5106	1.90463	0.000308868	8.45851	0.459344	1.02998	4.00654	7.07003	0.315119	2.55358	17.8
2000	1000	31.5529	85.2211	-388672	13.0621	43.3711	3.888	62.3081	0.415911	11.4773	1.90805	0.000215533	8.46227	0.461182	1.01738	3.98974	7.0798	0.316165	2.5638	17.6
2000	999	31.4273	84.8726	-387121	13.0132	43.1907	3.891	62.3404	0.41651	11.4441	1.91141	0.000138121	8.46568	0.463025	1.00488	3.97302	7.08955	0.317212	2.57404	17.5
2000	998	31.3023	84.5259	-385579	12.9646	43.0113	3.893	62.3731	0.417012	11.4108	1.91471	7.74331e-05	8.46865	0.464874	0.992493	3.95637	7.09929	0.318261	2.58432	17.3
2000	997	31.1777	84.1804	-384044	12.9161	42.8324	3.896	62.4065	0.417358	11.3776	1.91789	3.419e-05	8.47092	0.466732	0.980214	3.93978	7.10907	0.319315	2.59465	17.1
2000	996	31.0527	83.8344	-382512	12.8677	42.6533	3.898	62.4415	0.417356	11.3443	1.9208	8.86795e-06	8.47169	0.46861	0.96806	3.92324	7.11898	0.320378	2.60509	16.9
2000	995	30.9292	83.492	-380994	12.8198	42.4762	3.901	62.4757	0.417484	11.311	1.92383	0	8.47301	0.470482	0.955993	3.90679	7.12876	0.321436	2.6155	16.7
2000	994	30.7817	83.0923	-379306	12.7657	42.2676	3.906	62.5467	0.410474	11.2775	1.92132	0	8.44394	0.472735	0.944619	3.88952	7.14241	0.322731	2.62802	16.6
2000	993	30.6358	82.6965	-377634	12.7121	42.0611	3.912	62.6174	0.403554	11.244	1.91881	0	8.4149	0.474988	0.933366	3.87237	7.15597	0.324023	2.64055	16.5
2000	992	30.4912	82.3044	-375978	12.659	41.8566	3.917	62.6879	0.396723	11.2105	1.91629	0	8.38592	0.47724	0.922233	3.85532	7.16944	0.325312	2.65306	16.4
2000	991	30.3481	81.916	-374338	12.6064	41.6541	3.922	62.7582	0.389981	11.177	1.91376	0	8.35697	0.479491	0.911217	3.83838	7.18282	0.326599	2.66558	16.3
2000	990	30.2063	81.5313	-372714	12.5543	41.4536	3.928	62.8282	0.383325	11.1435	1.91123	0	8.32807	0.481742	0.900319	3.82155	7.19611	0.327883	2.67809	16.2
2000	989	30.0658	81.1501	-371105	12.5027	41.255	3.933	62.898	0.376755	11.1099	1.90868	0	8.2992	0.483992	0.889535	3.80483	7.20932	0.329165	2.6906	16
2000	988	29.9267	80.7726	-369511	12.4515	41.0583	3.938	62.9676	0.370271	11.0763	1.90613	0	8.27037	0.486241	0.878865	3.78821	7.22243	0.330444	2.70311	15.9
2000	987	29.7889	80.3985	-367932	12.4008	40.8636	3.943	63.037	0.36387	11.0427	1.90357	0	8.24157	0.488491	0.868308	3.7717	7.23546	0.33172	2.71561	15.8
2000	986	29.6524	80.0278	-366368	12.3505	40.6707	3.948	63.1061	0.357553	11.0091	1.90099	0	8.21281	0.490739	0.857862	3.75529	7.2484	0.332994	2.72811	15.7
2000	985	29.5172	79.6606	-364818	12.3007	40.4796	3.953	63.175	0.351317	10.9755	1.89841	0	8.18408	0.492988	0.847525	3.73898	7.26126	0.334266	2.74061	15.6
2000	984	29.3832	79.2967	-363282	12.2513	40.2903	3.958	63.2438	0.345163	10.9419	1.89582	0	8.15539	0.495235	0.837298	3.72278	7.27403	0.335535	2.75311	15.5
2000	983	29.2505	78.936	-361761	12.2024	40.1028	3.963	63.3123	0.339089	10.9083	1.89322	0	8.12672	0.497483	0.827177	3.70667	7.28672	0.336801	2.7656	15.4
2000	982	29.119	78.5786	-360253	12.1539	39.9171	3.968	63.3806	0.333095	10.8746	1.8906	0	8.09808	0.49973	0.817163	3.69066	7.29932	0.338066	2.77809	15.2
2000	981	28.9886	78.2245	-358759	12.1058	39.733	3.973	63.4487	0.327179	10.841	1.88798	0	8.06947	0.501976	0.807253	3.67476	7.31185	0.339327	2.79058	15.1
2000	980	28.8595	77.8734	-357279	12.0581	39.5507	3.978	63.5166	0.321341	10.8073	1.88534	0	8.04088	0.504223	0.797447	3.65894	7.32429	0.340587	2.80307	15
2000	979	28.7315	77.5255	-355811	12.0108	39.37	3.982	63.5843	0.315579	10.7736	1.8827	0	8.01232	0.506469	0.787743	3.64323	7.33665	0.341843	2.81555	14.9
2000	978	28.6047	77.1806	-354357	11.964	39.191	3.987	63.6518	0.309893	10.74	1.88004	0	7.98378	0.508715	0.778141	3.62761	7.34893	0.343098	2.82804	14.8
2000	977	28.479	76.8387	-352915	11.9175	39.0136	3.992	63.7191	0.304283	10.7063	1.87737	0	7.95526	0.51096	0.768639	3.61208	7.36114	0.34435	2.84052	14.7
2000	976	28.3544	76.4998	-351487	11.8714	38.8378	3.996	63.7863	0.298747	10.6726	1.87468	0	7.92677	0.513205	0.759236	3.59665	7.37327	0.3456	2.853	14.6
2000	975	28.2309	76.1638	-350071	11.8257	38.6636	4.001	63.8532	0.293284	10.6389	1.87199	0	7.89829	0.51545	0.749931	3.58131	7.38532	0.346847	2.86549	14.5
2000	974	28.1085	75.8308	-348667	11.7804	38.4909	4.005	63.92	0.287894	10.6052	1.86928	0	7.86983	0.517695	0.740723	3.56606	7.39729	0.348092	2.87796	14.4
2000	973	27.9871	75.5005	-347275	11.7355	38.3197	4.01	63.9866	0.282576	10.5715	1.86656	0	7.84138	0.51994	0.731611	3.55091	7.40919	0.349335	2.89044	14.3
2000	972	27.8668	75.1731	-345895	11.691	38.1501	4.014	64.053	0.277329	10.5378	1.86382	0	7.81296	0.522184	0.722594	3.53584	7.42101	0.350575	2.90292	14.2
2000	971	27.7476	74.8485	-344528	11.6468	37.982	4.019	64.1192	0.272152	10.5041	1.86107	0	7.78454	0.524429	0.713671	3.52086	7.43276	0.351813	2.9154	14
2000	970	27.6293	74.5266	-343172	11.6029	37.8153	4.023	64.1853	0.267046	10.4704	1.85831	0	7.75614	0.526673	0.704841	3.50597	7.44443	0.353048	2.92787	13.9
2000	969	27.5121	74.2073	-341827	11.5595	37.6501	4.027	64.2512	0.262008	10.4367	1.85553	0	7.72775	0.528917	0.696102	3.49116	7.45604	0.354282	2.94035	13.8
2000	968	27.3959	73.8908	-340494	11.5163	37.4863	4.032	64.3169	0.257038	10.403	1.85274	0	7.69937	0.531161	0.687454	3.47644	7.46757	0.355513	2.95282	13.7
2000	967	27.2806	73.5769	-339172	11.4736	37.3239	4.036	64.3825	0.252136	10.3693	1.84993	0	7.671	0.533405	0.678897	3.46181	7.47903	0.356742	2.9653	13.6
2000	966	27.1664	73.2655	-337861	11.4311	37.1629	4.04	64.4479	0.247301	10.3356	1.84711	0	7.64264	0.535648	0.670428	3.44726	7.49041	0.357968	2.97777	13.5
2000	965	27.053	72.9567	-336561	11.3891	37.0033	4.044	64.5132	0.242533	10.3019	1.84427	0	7.61429	0.537892	0.662048	3.43279	7.50173	0.359193	2.99024	13.4
2000	964	26.9407	72.6505	-335272	11.3473	36.845	4.048	64.5783	0.237829	10.2682	1.84142	0	7.58594	0.540136	0.653755	3.41841	7.51298	0.360415	3.00272	13.3
2000	963	26.8292	72.3467	-333994	11.3059	36.688	4.052	64.6432	0.233191	10.2345	1.83854	0	7.5576	0.542379	0.645548	3.4041	7.52416	0.361634	3.01519	13.2
2000	962	26.7187	72.0454	-332726	11.2648	36.5324	4.056	64.708	0.228617	10.2008	1.83566	0	7.52926	0.544623	0.637427	3.38988	7.53527	0.362852	3.02766	13.1
2000	961	26.6091	71.7465	-331469	11.224	36.3781	4.06	64.7726	0.224106	10.1671	1.83275	0	7.50092	0.546867	0.62939	3.37574	7.54631	0.364067	3.04013	13
2000	960	26.5004	71.45	-330222	11.1835	36.2251	4.064	64.8371	0.219658	10.1334	1.82983	0	7.47258	0.54911	0.621438	3.36168	7.55729	0.365281	3.05261	12.9
2000	959	26.3925	71.1559	-328985	11.1434	36.0733	4.068	64.9015	0.215273	10.0997	1.8269	0	7.44425	0.551354	0.613568	3.3477	7.5682	0.366492	3.06508	12.8
2000	958	26.2856	70.8641	-327758	11.1036	35.9227	4.072	64.9657	0.21095	10.066	1.82394	0	7.41591	0.553598	0.605781	3.33379	7.57905	0.3677	3.07755	12.7
2000	957	26.1795	70.5746	-326541	11.064	35.7734	4.076	65.0298	0.206687	10.0324	1.82097	0	7.38757	0.555841	0.598075	3.31996	7.58983	0.368907	3.09002	12.6
2000	956	26.0742	70.2874	-325333	11.0248	35.6254	4.08	65.0937	0.202485	9.99873	1.81797	0	7.35923	0.558085	0.590449	3.30621	7.60054	0.370111	3.1025	12.5
2000	955	25.9698	70.0025	-324136	10.9859	35.4785	4.083	65.1575	0.198343	9.96508	1.81496	0	7.33089	0.560329	0.582904	3.29253	7.61119	0.371313	3.11497	12.4
2000	954	25.8662	69.7197	-322947	10.9473	35.3328	4.087	65.2211	0.194261	9.93144	1.81193	0	7.30254	0.562573	0.575437	3.27893	7.62178	0.372513	3.12745	12.3
2000	953	25.7634	69.4392	-321769	10.9089	35.1883	4.091	65.2847	0.190237	9.89781	1.80888	0	7.27419	0.564817	0.56805	3.2654	7.63231	0.373711	3.13992	12.2
2000	952	25.6615	69.1608	-320599	10.8709	35.0449	4.094	65.3481	0.186271	9.86419	1.80582	0	7.24582	0.567061	0.560739	3.25194	7.64277	0.374907	3.1524	12.1
2000	951	25.5603	68.8846	-319439	10.8331	34.9027	4.098	65.4114	0.182363	9.83058	1.80273	0	7.21745	0.569305	0.553506	3.23856	7.65317	0.3761	3.16487	12
2000	950	25.46	68.6104	-318288	10.7956	34.7616	4.102	65.4745	0.178512	9.79698	1.79962	0	7.18907	0.571549	0.546349	3.22524	7.66351	0.377292	3.17735	11.9
2000	949	25.3604	68.3384	-317146	10.7584	34.6216	4.105	65.5376	0.174718	9.76339	1.79649	0	7.16068	0.573794	0.539268	3.212	7.67379	0.378481	3.18983	11.8
2000	948	25.2615	68.0684	-316013	10.7215	34.4827	4.109	65.6005	0.17098	9.72981	1.79334	0	7.13228	0.576038	0.532261	3.19883	7.68401	0.379668	3.2023	11.7
2000	947	25.1635	67.8005	-314888	10.6848	34.3449	4.112	65.6633	0.167297	9.69625	1.79017	0	7.10387	0.578283	0.525329	3.18573	7.69417	0.380853	3.21478	11.6
2000	946	25.0662	67.5346	-313773	10.6484	34.2082	4.116	65.726	0.163669	9.6627	1.78698	0	7.07544	0.580528	0.51847	3.17269	7.70428	0.382036	3.22726	11.6
2000	945	24.9696	67.2706	-312665	10.6123	34.0726	4.119	65.7885	0.160096	9.62916	1.78376	0	7.047	0.582773	0.511685	3.15972	7.71432	0.383217	3.23974	11.5
2000	944	24.8738	67.0087	-311567	10.5765	33.938	4.122	65.851	0.156577	9.59563	1.78053	0	7.01854	0.585018	0.504971	3.14682	7.7243	0.384395	3.25222	11.4
2000	943	24.7787	66.7487	-310476	10.5409	33.8044	4.126	65.9133	0.153111	9.56212	1.77727	0	6.99007	0.587263	0.49833	3.13399	7.73423	0.385572	3.26471	11.3
2000	942	24.6843	66.4906	-309394	10.5055	33.6718	4.129	65.9756	0.149698	9.52863	1.77399	0	6.96158	0.589509	0.491759	3.12122	7.7441	0.386746	3.27719	11.2
2000	941	24.5906	66.2344	-308321	10.4704	33.5403	4.132	66.0377	0.146337	9.49515	1.77068	0	6.93307	0.591755	0.485259	3.10852	7.75392	0.387919	3.28967	11.1
2000	940	24.4977	65.9801	-307255	10.4356	33.4098	4.135	66.0997	0.143029	9.46169	1.76735	0	6.90455	0.594001	0.478829	3.09588	7.76368	0.389089	3.30216	11
2000	939	24.4054	65.7276	-306197	10.401	33.2802	4.139	66.1617	0.139772	9.42824	1.764	0	6.876	0.596247	0.472468	3.08331	7.77338	0.390257	3.31465	10.9
2000	938	24.3138	65.477	-305147	10.3667	33.1516	4.142	66.2235	0.136566	9.39481	1.76062	0	6.84743	0.598493	0.466176	3.0708	7.78303	0.391423	3.32713	10.8
2000	937	24.2228	65.2282	-304105	10.3326	33.024	4.145	66.2853	0.133411	9.3614	1.75722	0	6.81884	0.600739	0.459952	3.05835	7.79262	0.392587	3.33962	10.7
2000	936	24.1326	64.9812	-303071	10.2987	32.8974	4.148	66.3469	0.130305	9.328	1.7538	0	6.79023	0.602986	0.453796	3.04596	7.80216	0.393749	3.35211	10.6
2000	935	24.043	64.7359	-302045	10.2651	32.7717	4.151	66.4085	0.12725	9.29463	1.75034	0	6.76159	0.605233	0.447707	3.03363	7.81165	0.394909	3.3646	10.6
2000	934	23.9541	64.4924	-301026	10.2317	32.6469	4.154	66.4699	0.124243	9.26127	1.74687	0	6.73293	0.60748	0.441685	3.02137	7.82108	0.396066	3.37709	10.5
2000	933	23.8658	64.2507	-300014	10.1985	32.523	4.157	66.5313	0.121286	9.22793	1.74336	0	6.70424	0.609727	0.435728	3.00916	7.83046	0.397222	3.38959	10.4
2000	932	23.7781	64.0107	-299010	10.1656	32.4001	4.16	66.5926	0.118376	9.19462	1.73983	0	6.67552	0.611975	0.429837	2.99701	7.83979	0.398375	3.40208	10.3
2000	931	23.6911	63.7723	-298014	10.1329	32.278	4.163	66.6538	0.115515	9.16132	1.73628	0	6.64678	0.614223	0.424012	2.98492	7.84907	0.399527	3.41458	10.2
2000	930	23.6047	63.5357	-297025	10.1005	32.1569	4.166	66.7149	0.112701	9.12804	1.73269	0	6.61801	0.616471	0.41825	2.97289	7.85829	0.400676	3.42708	10.1
2000	929	23.519	63.3007	-296042	10.0682	32.0366	4.169	66.7759	0.109934	9.09479	1.72908	0	6.58921	0.618719	0.412553	2.96091	7.86747	0.401824	3.43957	10
2000	928	23.4338	63.0674	-295068	10.0362	31.9172	4.171	66.8369	0.107213	9.06155	1.72544	0	6.56038	0.620967	0.40692	2.94899	7.87659	0.402969	3.45207	10
2000	927	23.3492	62.8356	-294100	10.0044	31.7987	4.174	66.8978	0.104538	9.02834	1.72178	0	6.53152	0.623216	0.401349	2.93713	7.88566	0.404112	3.46457	9.9
2000	926	23.2653	62.6055	-293139	9.97281	31.681	4.177	66.9586	0.10191	8.99515	1.71808	0	6.50262	0.625465	0.395842	2.92532	7.89469	0.405253	3.47707	9.8
2000	925	23.1819	62.377	-292185	9.94144	31.5642	4.18	67.0193	0.0993263	8.96199	1.71436	0	6.4737	0.627714	0.390396	2.91356	7.90366	0.406392	3.48958	9.7
2000	924	23.0992	62.1501	-291237	9.91028	31.4482	4.182	67.08	0.0967877	8.92884	1.7106	0	6.44474	0.629963	0.385012	2.90186	7.91259	0.407529	3.50208	9.6
2000	923	23.017	61.9247	-290297	9.87934	31.333	4.185	67.1406	0.0942936	8.89572	1.70682	0	6.41574	0.632213	0.37969	2.89021	7.92146	0.408664	3.51459	9.5
2000	922	22.9354	61.7009	-289363	9.8486	31.2186	4.188	67.2011	0.0918436	8.86263	1.70301	0	6.38671	0.634462	0.374428	2.87861	7.93029	0.409797	3.52709	9.5
2000	921	22.8543	61.4786	-288436	9.81807	31.1051	4.19	67.2616	0.0894372	8.82956	1.69916	0	6.35764	0.636712	0.369227	2.86707	7.93907	0.410927	3.5396	9.4
2000	920	22.7738	61.2578	-287516	9.78774	30.9923	4.193	67.322	0.0870741	8.79652	1.69529	0	6.32854	0.638962	0.364086	2.85558	7.94781	0.412056	3.55211	9.3
2000	919	22.6939	61.0385	-286602	9.75761	30.8804	4.196	67.3823	0.0847539	8.7635	1.69138	0	6.2994	0.641213	0.359005	2.84413	7.95649	0.413182	3.56462	9.2
2000	918	22.6145	60.8207	-285695	9.72769	30.7692	4.198	67.4426	0.0824762	8.7305	1.68744	0	6.27022	0.643463	0.353982	2.83274	7.96513	0.414307	3.57713	9.1
2000	917	22.5357	60.6043	-284794	9.69796	30.6588	4.201	67.5028	0.0802405	8.69754	1.68348	0	6.241	0.645714	0.349019	2.8214	7.97372	0.415429	3.58964	9.1
2000	916	22.4574	60.3894	-283899	9.66843	30.5492	4.203	67.563	0.0780466	8.6646	1.67947	0	6.21174	0.647965	0.344114	2.8101	7.98227	0.41655	3.60216	9
2000	915	22.3797	60.176	-283010	9.6391	30.4403	4.206	67.6231	0.0758939	8.63169	1.67544	0	6.18244	0.650216	0.339267	2.79886	7.99077	0.417668	3.61467	8.9
2000	914	22.1811	59.6784	-280985	9.57191	30.1693	4.218	67.8256	0.0768021	8.60337	1.64179	0	6.01955	0.635066	0.305351	2.79594	8.02864	0.420824	3.64702	8.3
2000	913	22.1014	59.4602	-280058	9.54143	30.0579	4.221	67.8807	0.0770793	8.56875	1.63894	0	5.99484	0.633123	0.298923	2.78875	8.0367	0.421981	3.66019	8.2
2000	912	22.0221	59.2434	-279137	9.51114	29.9472	4.223	67.9358	0.0773567	8.53417	1.63604	0	5.96999	0.631176	0.292585	2.78162	8.04474	0.423136	3.67336	8
2000	911	21.9433	59.0279	-278222	9.48104	29.8373	4.225	67.9909	0.0776344	8.49962	1.6331	0	5.94502	0.629225	0.286339	2.77454	8.05276	0.42429	3.68655	7.9
2000	910	21.8634	58.8099	-277313	9.45092	29.726	4.228	68.0541	0.0769333	8.46473	1.62836	0	5.91265	0.627859	0.280955	2.76764	8.06124	0.425475	3.70003	7.8
2000	909	21.783	58.5912	-276409	9.42089	29.6143	4.231	68.122	0.0756676	8.42965	1.62255	0	5.87599	0.626843	0.276107	2.76087	8.06996	0.426675	3.71369	7.7
2000	908	21.7032	58.3741	-275512	9.39108	29.5034	4.233	68.1897	0.0744242	8.3946	1.61674	0	5.83944	0.625824	0.271325	2.75414	8.07864	0.427872	3.72734	7.6
2000	907	21.6241	58.1587	-274622	9.36149	29.3935	4.236	68.2571	0.0732029	8.35957	1.61091	0	5.803	0.6248	0.266606	2.74747	8.08726	0.429067	3.74098	7.6
2000	906	21.5455	57.945	-273739	9.33212	29.2844	4.239	68.3244	0.0720031	8.32457	1.60508	0	5.76669	0.623773	0.261951	2.74084	8.09584	0.430259	3.75461	7.5
2000	905	21.4676	57.7329	-272863	9.30297	29.1762	4.242	68.3915	0.0708247	8.2896	1.59924	0	5.73049	0.622742	0.257359	2.73425	8.10436	0.431447	3.76824	7.4
2000	904	21.3903	57.5224	-271994	9.27403	29.0688	4.244	68.4583	0.0696673	8.25466	1.59339	0	5.69441	0.621708	0.252829	2.72771	8.11283	0.432633	3.78185	7.3
2000	903	21.3137	57.3134	-271131	9.2453	28.9623	4.247	68.525	0.0685305	8.21975	1.58754	0	5.65845	0.620671	0.248361	2.72121	8.12125	0.433816	3.79546	7.3
2000	902	21.2376	57.1061	-270274	9.21679	28.8566	4.25	68.5914	0.0674139	8.18486	1.58167	0	5.62262	0.61963	0.243954	2.71477	8.12962	0.434996	3.80906	7.2
2000	901	21.1621	56.9003	-269425	9.18848	28.7517	4.252	68.6576	0.0663174	8.15001	1.5758	0	5.58691	0.618586	0.239608	2.70836	8.13794	0.436173	3.82265	7.1
2000	900	21.0872	56.6961	-268581	9.16037	28.6477	4.255	68.7237	0.0652405	8.11518	1.56992	0	5.55132	0.617538	0.235321	2.702	8.14621	0.437347	3.83623	7
orthopyroxene_0	thermodynamic	data	and	composition:
Pressure	Temperature	mass	S	H	V	Cp	structure	formula	SiO2	TiO2	Al2O3	Fe2O3	Cr2O3	FeO	MnO	MgO	CaO	Na2O	K2O	H2O	Mg#
2000	1182	0.222642	0.539271	-2841.19	0.069116	0.282215	opx	Na0.00Ca0.08Fe''0.29Mg1.57Fe'''0.01Ti0.00Al0.10Si1.94O6	55.1567	0.0146829	2.35015	0.564559	0	9.93499	0	29.8726	2.08153	0.0247846	0	0	84.4086
2000	1181	0.130111	0.315014	-1660.03	0.040384	0.164879	opx	Na0.00Ca0.08Fe''0.29Mg1.57Fe'''0.01Ti0.00Al0.10Si1.94O6	55.1436	0.0146843	2.35298	0.564839	0	9.96723	0	29.833	2.09873	0.0249144	0	0
2000	1180	0.129629	0.31371	-1653.52	0.040227	0.16422	opx	Na0.00Ca0.08Fe''0.29Mg1.57Fe'''0.01Ti0.00Al0.10Si1.94O6	55.1305	0.0146849	2.35578	0.565107	0	9.99956	0	29.7932	2.11615	0.0250451	0	0
2000	1179	0.12915	0.312417	-1647.06	0.040072	0.163566	opx	Na0.00Ca0.08Fe''0.30Mg1.56Fe'''0.02Ti0.00Al0.10Si1.94O6	55.1173	0.0146847	2.35854	0.565364	0	10.032	0	29.7532	2.1338	0.0251768	0	0
2000	1178	0.380703	0.920468	-4852.49	0.11809	0.481947	opx	Na0.00Ca0.08Fe''0.30Mg1.56Fe'''0.01Ti0.00Al0.10Si1.94O6	55.1063	0.0147215	2.34215	0.564881	0	10.1007	0	29.6936	2.15243	0.0252875	0	0
2000	1177	0.354327	0.856272	-4513.98	0.109879	0.448371	opx	Na0.00Ca0.08Fe''0.30Mg1.56Fe'''0.01Ti0.00Al0.10Si1.94O6	55.095	0.014754	2.32727	0.56444	0	10.1668	0	29.6352	2.17114	0.0253992	0	0
2000	1176	0.346497	0.836932	-4411.93	0.107422	0.438279	opx	Na0.00Ca0.08Fe''0.30Mg1.56Fe'''0.01Ti0.00Al0.10Si1.94O6	55.0836	0.0147848	2.31251	0.56399	0	10.2329	0	29.5767	2.18999	0.0255107	0	0
2000	1175	0.338919	0.818222	-4313.21	0.105045	0.428516	opx	Na0.00Ca0.08Fe''0.30Mg1.55Fe'''0.01Ti0.00Al0.10Si1.95O6	55.0722	0.014814	2.29789	0.563532	0	10.299	0	29.518	2.20898	0.0256217	0	0
2000	1174	0.331585	0.800116	-4217.68	0.102744	0.419067	opx	Na0.00Ca0.08Fe''0.31Mg1.55Fe'''0.01Ti0.00Al0.10Si1.95O6	55.0606	0.0148417	2.2834	0.563065	0	10.365	0	29.4592	2.22811	0.0257324	0	0
2000	1173	0.324482	0.782587	-4125.21	0.100516	0.40992	opx	Na0.00Ca0.09Fe''0.31Mg1.55Fe'''0.01Ti0.00Al0.09Si1.95O6	55.049	0.0148678	2.26904	0.562591	0	10.4311	0	29.4002	2.24738	0.0258427	0	0
2000	1172	0.317603	0.765612	-4035.65	0.098359	0.401061	opx	Na0.00Ca0.09Fe''0.31Mg1.55Fe'''0.01Ti0.00Al0.09Si1.95O6	55.0373	0.0148925	2.2548	0.56211	0	10.4971	0	29.3411	2.2668	0.0259527	0	0
2000	1171	0.310937	0.749169	-3948.91	0.096269	0.392479	opx	Na0.00Ca0.09Fe''0.31Mg1.54Fe'''0.01Ti0.00Al0.09Si1.95O6	55.0255	0.0149157	2.24069	0.561622	0	10.5631	0	29.2818	2.28635	0.0260623	0	0
2000	1170	0.304477	0.733234	-3864.85	0.094243	0.384162	opx	Na0.00Ca0.09Fe''0.31Mg1.54Fe'''0.01Ti0.00Al0.09Si1.95O6	55.0136	0.0149374	2.22671	0.561127	0	10.629	0	29.2224	2.30605	0.0261716	0	0
2000	1169	0.11165	0.268743	-1416.42	0.034547	0.140817	opx	Na0.00Ca0.09Fe''0.32Mg1.54Fe'''0.02Ti0.00Al0.09Si1.95O6	54.9933	0.0151425	2.22689	0.563481	0	10.7046	0	29.1712	2.29922	0.0262542	0	0
2000	1168	0.16869	0.40584	-2138.85	0.05218	0.212673	opx	Na0.00Ca0.09Fe''0.32Mg1.54Fe'''0.02Ti0.00Al0.09Si1.95O6	54.9756	0.0152871	2.22253	0.564903	0	10.7772	0	29.1172	2.30094	0.0263447	0	0
2000	1167	0.164911	0.396553	-2089.77	0.050995	0.207827	opx	Na0.00Ca0.09Fe''0.32Mg1.53Fe'''0.02Ti0.00Al0.09Si1.95O6	54.9579	0.0154309	2.2182	0.56632	0	10.8499	0	29.0632	2.30262	0.0264345	0	0
2000	1166	0.161261	0.387586	-2042.38	0.049851	0.203146	opx	Na0.00Ca0.09Fe''0.32Mg1.53Fe'''0.02Ti0.00Al0.09Si1.95O6	54.9402	0.015574	2.21391	0.567732	0	10.9227	0	29.0091	2.30425	0.0265237	0	0
2000	1165	0.157735	0.378924	-1996.61	0.048746	0.198626	opx	Na0.00Ca0.09Fe''0.33Mg1.53Fe'''0.02Ti0.00Al0.09Si1.95O6	54.9224	0.0157163	2.20965	0.569139	0	10.9956	0	28.955	2.30583	0.0266123	0	0
2000	1164	0.154327	0.370554	-1952.38	0.047678	0.194257	opx	Na0.00Ca0.09Fe''0.33Mg1.53Fe'''0.02Ti0.00Al0.09Si1.95O6	54.9046	0.0158579	2.20543	0.57054	0	11.0687	0	28.9008	2.30737	0.0267004	0	0
2000	1163	0.151032	0.362463	-1909.62	0.046645	0.190034	opx	Na0.00Ca0.09Fe''0.33Mg1.53Fe'''0.02Ti0.00Al0.09Si1.95O6	54.8868	0.0159987	2.20123	0.571938	0	11.1419	0	28.8466	2.30886	0.0267878	0	0
2000	1162	0.147845	0.354639	-1868.28	0.045646	0.18595	opx	Na0.00Ca0.09Fe''0.33Mg1.52Fe'''0.02Ti0.00Al0.09Si1.95O6	54.8689	0.0161387	2.19707	0.573331	0	11.2152	0	28.7922	2.3103	0.0268746	0	0
2000	1161	0.144761	0.347071	-1828.29	0.04468	0.182	opx	Na0.00Ca0.09Fe''0.34Mg1.52Fe'''0.02Ti0.00Al0.09Si1.95O6	54.8509	0.016278	2.19294	0.574721	0	11.2886	0	28.7378	2.31169	0.0269609	0	0
clinopyroxene_0	thermodynamic	data	and	composition:
Pressure	Temperature	mass	S	H	V	Cp	structure	formula	SiO2	TiO2	Al2O3	Fe2O3	Cr2O3	FeO	MnO	MgO	CaO	Na2O	K2O	H2O
2000	1169	0.401416	0.94265	-5129.24	0.124546	0.48245	cpx	Na0.01Ca0.67Fe''0.21Mg1.01Fe'''0.03Ti0.00Al0.16Si1.91O6	52.3865	0.0527112	3.818	1.05914	0	6.75604	0	18.5078	17.234	0.185819	0	0
2000	1168	0.263257	0.617968	-3362.76	0.081662	0.316326	cpx	Na0.01Ca0.67Fe''0.21Mg1.00Fe'''0.03Ti0.00Al0.16Si1.91O6	52.376	0.0535372	3.81517	1.06386	0	6.80173	0	18.485	17.2181	0.18659	0	0
2000	1167	0.25622	0.601216	-3271.81	0.079462	0.307797	cpx	Na0.01Ca0.67Fe''0.21Mg1.00Fe'''0.03Ti0.00Al0.16Si1.91O6	52.3655	0.0543686	3.81235	1.06858	0	6.84748	0	18.4621	17.2023	0.187361	0	0
2000	1166	0.249426	0.585047	-3184.02	0.077339	0.299566	cpx	Na0.01Ca0.67Fe''0.21Mg1.00Fe'''0.03Ti0.00Al0.16Si1.91O6	52.3549	0.0552054	3.80955	1.07329	0	6.89328	0	18.439	17.1865	0.188132	0	0
2000	1165	0.242866	0.569438	-3099.26	0.075288	0.291618	cpx	Na0.01Ca0.67Fe''0.21Mg1.00Fe'''0.03Ti0.00Al0.16Si1.91O6	52.3444	0.0560477	3.80676	1.078	0	6.93915	0	18.4159	17.1709	0.188904	0	0
2000	1164	0.236529	0.554362	-3017.4	0.073308	0.283941	cpx	Na0.01Ca0.67Fe''0.21Mg1.00Fe'''0.03Ti0.00Al0.16Si1.91O6	52.3337	0.0568953	3.804	1.08271	0	6.98508	0	18.3926	17.1553	0.189675	0	0
2000	1163	0.230405	0.539798	-2938.32	0.071395	0.276523	cpx	Na0.01Ca0.67Fe''0.21Mg1.00Fe'''0.03Ti0.00Al0.16Si1.91O6	52.323	0.0577485	3.80125	1.08742	0	7.03108	0	18.3692	17.1398	0.190447	0	0
2000	1162	0.224486	0.525723	-2861.88	0.069545	0.269354	cpx	Na0.01Ca0.67Fe''0.22Mg1.00Fe'''0.03Ti0.00Al0.16Si1.91O6	52.3123	0.0586072	3.79852	1.09213	0	7.07713	0	18.3456	17.1244	0.191219	0	0
2000	1161	0.218762	0.512116	-2787.99	0.067757	0.262423	cpx	Na0.01Ca0.67Fe''0.22Mg1.00Fe'''0.03Ti0.00Al0.16Si1.91O6	52.3015	0.0594714	3.79581	1.09685	0	7.12326	0	18.322	17.1091	0.191992	0	0
2000	1160	0.147186	0.344421	-1875.24	0.045579	0.176519	cpx	Na0.01Ca0.67Fe''0.22Mg1.00Fe'''0.03Ti0.00Al0.16Si1.91O6	52.2913	0.0603801	3.79305	1.10124	0	7.16548	0	18.2978	17.098	0.192794	0	0
2000	1159	0.129581	0.303093	-1650.5	0.040119	0.155362	cpx	Na0.01Ca0.67Fe''0.22Mg0.99Fe'''0.03Ti0.00Al0.16Si1.91O6	52.2793	0.0613802	3.79143	1.1062	0	7.20096	0	18.2653	17.1017	0.193719	0	0
2000	1158	0.125749	0.294002	-1601.26	0.038925	0.150726	cpx	Na0.01Ca0.67Fe''0.22Mg0.99Fe'''0.03Ti0.00Al0.16Si1.91O6	52.2673	0.0623903	3.78982	1.11116	0	7.23639	0	18.2327	17.1055	0.194647	0	0
2000	1157	0.122052	0.285234	-1553.78	0.037773	0.146254	cpx	Na0.01Ca0.67Fe''0.22Mg0.99Fe'''0.03Ti0.00Al0.16Si1.91O6	52.2553	0.0634103	3.78823	1.11613	0	7.27179	0	18.2	17.1095	0.195577	0	0
2000	1156	0.118485	0.276776	-1507.96	0.036662	0.141939	cpx	Na0.01Ca0.67Fe''0.22Mg0.99Fe'''0.03Ti0.00Al0.16Si1.91O6	52.2433	0.0644405	3.78667	1.12111	0	7.30716	0	18.1673	17.1136	0.19651	0	0
2000	1155	0.115041	0.268614	-1463.74	0.035589	0.137775	cpx	Na0.01Ca0.67Fe''0.22Mg0.99Fe'''0.03Ti0.00Al0.16Si1.91O6	52.2312	0.065481	3.78512	1.1261	0	7.34249	0	18.1344	17.1178	0.197447	0	0
2000	1154	0.111716	0.260737	-1421.06	0.034554	0.133756	cpx	Na0.01Ca0.67Fe''0.23Mg0.99Fe'''0.03Ti0.00Al0.16Si1.91O6	52.2191	0.0665318	3.78359	1.1311	0	7.37779	0	18.1015	17.1221	0.198386	0	0
2000	1153	0.108506	0.253132	-1379.86	0.033554	0.129875	cpx	Na0.01Ca0.67Fe''0.23Mg0.98Fe'''0.03Ti0.00Al0.16Si1.91O6	52.2069	0.0675931	3.78208	1.13611	0	7.41305	0	18.0684	17.1265	0.199328	0	0
2000	1152	0.105404	0.245789	-1340.06	0.032588	0.126127	cpx	Na0.01Ca0.67Fe''0.23Mg0.98Fe'''0.03Ti0.00Al0.16Si1.91O6	52.1947	0.068665	3.78059	1.14113	0	7.44829	0	18.0353	17.131	0.200274	0	0
2000	1151	0.102408	0.238696	-1301.62	0.031656	0.122507	cpx	Na0.01Ca0.67Fe''0.23Mg0.98Fe'''0.03Ti0.00Al0.16Si1.91O6	52.1825	0.0697476	3.77913	1.14617	0	7.4835	0	18.0021	17.1357	0.201223	0	0
2000	1150	0.099512	0.231845	-1264.47	0.030754	0.119009	cpx	Na0.01Ca0.67Fe''0.23Mg0.98Fe'''0.03Ti0.00Al0.16Si1.91O6	52.1702	0.070841	3.77767	1.15122	0	7.51869	0	17.9688	17.1404	0.202175	0	0
2000	1149	0.096713	0.225224	-1228.58	0.029883	0.115628	cpx	Na0.01Ca0.67Fe''0.23Mg0.98Fe'''0.03Ti0.00Al0.16Si1.91O6	52.1579	0.0719454	3.77624	1.15628	0	7.55386	0	17.9354	17.1453	0.20313	0	0
2000	1148	0.094007	0.218825	-1193.88	0.029041	0.112361	cpx	Na0.01Ca0.67Fe''0.23Mg0.98Fe'''0.03Ti0.00Al0.16Si1.91O6	52.1455	0.0730608	3.77483	1.16135	0	7.589	0	17.9019	17.1503	0.204089	0	0
2000	1147	0.09139	0.212639	-1160.34	0.028227	0.109202	cpx	Na0.01Ca0.67Fe''0.23Mg0.97Fe'''0.03Ti0.00Al0.16Si1.91O6	52.1331	0.0741874	3.77344	1.16644	0	7.62412	0	17.8683	17.1554	0.205051	0	0
2000	1146	0.088859	0.206657	-1127.9	0.02744	0.106147	cpx	Na0.01Ca0.67Fe''0.23Mg0.97Fe'''0.03Ti0.00Al0.16Si1.91O6	52.1207	0.0753253	3.77206	1.17154	0	7.65923	0	17.8346	17.1605	0.206017	0	0
2000	1145	0.08641	0.200873	-1096.52	0.026678	0.103192	cpx	Na0.01Ca0.67Fe''0.24Mg0.97Fe'''0.03Ti0.00Al0.16Si1.91O6	52.1083	0.0764747	3.7707	1.17666	0	7.69433	0	17.8008	17.1658	0.206986	0	0
2000	1144	0.08404	0.195278	-1066.17	0.025942	0.100333	cpx	Na0.01Ca0.67Fe''0.24Mg0.97Fe'''0.03Ti0.00Al0.16Si1.91O6	52.0957	0.0776356	3.76937	1.18179	0	7.72941	0	17.7669	17.1712	0.207959	0	0
2000	1143	0.081747	0.189865	-1036.8	0.025229	0.097567	cpx	Na0.01Ca0.67Fe''0.24Mg0.97Fe'''0.03Ti0.00Al0.16Si1.91O6	52.0832	0.0788082	3.76805	1.18694	0	7.76447	0	17.7329	17.1767	0.208936	0	0
2000	1142	0.079527	0.184627	-1008.37	0.024539	0.09489	cpx	Na0.01Ca0.67Fe''0.24Mg0.97Fe'''0.03Ti0.00Al0.16Si1.91O6	52.0706	0.0799927	3.76675	1.1921	0	7.79953	0	17.6989	17.1822	0.209916	0	0
2000	1141	0.077378	0.179557	-980.861	0.023871	0.092299	cpx	Na0.01Ca0.67Fe''0.24Mg0.96Fe'''0.03Ti0.00Al0.16Si1.91O6	52.058	0.0811892	3.76546	1.19728	0	7.83459	0	17.6647	17.1879	0.2109	0	0
2000	1140	0.075297	0.17465	-954.224	0.023224	0.089791	cpx	Na0.02Ca0.68Fe''0.24Mg0.96Fe'''0.03Ti0.00Al0.16Si1.91O6	52.0453	0.0823977	3.7642	1.20248	0	7.86963	0	17.6305	17.1936	0.211887	0	0
2000	1139	0.073282	0.169899	-928.431	0.022598	0.087362	cpx	Na0.02Ca0.68Fe''0.24Mg0.96Fe'''0.03Ti0.00Al0.16Si1.91O6	52.0326	0.0836186	3.76295	1.20769	0	7.90468	0	17.5961	17.1995	0.212879	0	0
2000	1138	0.071329	0.165298	-903.451	0.021991	0.085009	cpx	Na0.02Ca0.68Fe''0.24Mg0.96Fe'''0.03Ti0.00Al0.16Si1.91O6	52.0198	0.0848518	3.76173	1.21293	0	7.93972	0	17.5617	17.2054	0.213875	0	0
2000	1137	0.069438	0.160842	-879.255	0.021404	0.082731	cpx	Na0.02Ca0.68Fe''0.24Mg0.96Fe'''0.03Ti0.00Al0.16Si1.91O6	52.007	0.0860976	3.76052	1.21818	0	7.97476	0	17.5271	17.2114	0.214874	0	0
2000	1136	0.067605	0.156525	-855.813	0.020835	0.080523	cpx	Na0.02Ca0.68Fe''0.25Mg0.96Fe'''0.03Ti0.00Al0.16Si1.91O6	51.9942	0.0873561	3.75932	1.22345	0	8.00981	0	17.4925	17.2175	0.215878	0	0
2000	1135	0.065828	0.152344	-833.099	0.020283	0.078384	cpx	Na0.02Ca0.68Fe''0.25Mg0.95Fe'''0.03Ti0.00Al0.16Si1.91O6	51.9813	0.0886274	3.75815	1.22874	0	8.04486	0	17.4578	17.2237	0.216885	0	0
2000	1134	0.064106	0.148292	-811.086	0.019748	0.076311	cpx	Na0.02Ca0.68Fe''0.25Mg0.95Fe'''0.03Ti0.00Al0.16Si1.91O6	51.9684	0.0899118	3.757	1.23404	0	8.07992	0	17.4229	17.2299	0.217897	0	0
2000	1133	0.062437	0.144364	-789.749	0.01923	0.074302	cpx	Na0.02Ca0.68Fe''0.25Mg0.95Fe'''0.03Ti0.00Al0.16Si1.91O6	51.9554	0.0912093	3.75586	1.23937	0	8.11498	0	17.388	17.2363	0.218912	0	0
2000	1132	0.060818	0.140558	-769.065	0.018728	0.072354	cpx	Na0.02Ca0.68Fe''0.25Mg0.95Fe'''0.03Ti0.00Al0.16Si1.91O6	51.9423	0.0925201	3.75474	1.24472	0	8.15006	0	17.353	17.2427	0.219932	0	0
2000	1131	0.059249	0.136868	-749.01	0.018241	0.070466	cpx	Na0.02Ca0.68Fe''0.25Mg0.95Fe'''0.03Ti0.00Al0.16Si1.91O6	51.9293	0.0938444	3.75364	1.25009	0	8.18514	0	17.3179	17.2492	0.220957	0	0
2000	1130	0.057726	0.13329	-729.562	0.017768	0.068635	cpx	Na0.02Ca0.68Fe''0.25Mg0.95Fe'''0.03Ti0.00Al0.16Si1.91O6	51.9161	0.0951824	3.75255	1.25548	0	8.22024	0	17.2827	17.2557	0.221985	0	0
2000	1129	0.056249	0.129821	-710.701	0.01731	0.066859	cpx	Na0.02Ca0.68Fe''0.25Mg0.94Fe'''0.03Ti0.00Al0.16Si1.91O6	51.903	0.0965342	3.75149	1.2609	0	8.25536	0	17.2474	17.2624	0.223018	0	0
2000	1128	0.054816	0.126456	-692.406	0.016866	0.065136	cpx	Na0.02Ca0.68Fe''0.25Mg0.94Fe'''0.04Ti0.00Al0.16Si1.91O6	51.8897	0.0978999	3.75044	1.26634	0	8.2905	0	17.212	17.2691	0.224055	0	0
2000	1127	0.053426	0.123192	-674.657	0.016435	0.063465	cpx	Na0.02Ca0.68Fe''0.26Mg0.94Fe'''0.04Ti0.00Al0.16Si1.91O6	51.8765	0.0992799	3.74941	1.27179	0	8.32566	0	17.1765	17.2758	0.225096	0	0
2000	1126	0.052076	0.120026	-657.436	0.016016	0.061843	cpx	Na0.02Ca0.68Fe''0.26Mg0.94Fe'''0.04Ti0.00Al0.16Si1.91O6	51.8631	0.100674	3.7484	1.27728	0	8.36083	0	17.1408	17.2827	0.226143	0	0
2000	1125	0.050767	0.116954	-640.725	0.01561	0.06027	cpx	Na0.02Ca0.68Fe''0.26Mg0.94Fe'''0.04Ti0.00Al0.16Si1.91O6	51.8498	0.102083	3.74741	1.28278	0	8.39604	0	17.1051	17.2896	0.227193	0	0
2000	1124	0.049496	0.113973	-624.507	0.015216	0.058743	cpx	Na0.02Ca0.68Fe''0.26Mg0.94Fe'''0.04Ti0.00Al0.16Si1.91O6	51.8363	0.103506	3.74643	1.28832	0	8.43127	0	17.0693	17.2966	0.228248	0	0
2000	1123	0.048261	0.11108	-608.765	0.014834	0.057261	cpx	Na0.02Ca0.68Fe''0.26Mg0.93Fe'''0.04Ti0.00Al0.16Si1.91O6	51.8229	0.104945	3.74547	1.29387	0	8.46652	0	17.0334	17.3036	0.229308	0	0
2000	1122	0.047063	0.108272	-593.484	0.014463	0.055822	cpx	Na0.02Ca0.68Fe''0.26Mg0.93Fe'''0.04Ti0.00Al0.16Si1.91O6	51.8093	0.106398	3.74453	1.29945	0	8.50181	0	16.9974	17.3107	0.230372	0	0
2000	1121	0.045899	0.105546	-578.647	0.014102	0.054425	cpx	Na0.02Ca0.68Fe''0.26Mg0.93Fe'''0.04Ti0.00Al0.16Si1.91O6	51.7957	0.107867	3.74361	1.30506	0	8.53713	0	16.9613	17.3178	0.231441	0	0
2000	1120	0.044769	0.1029	-564.241	0.013752	0.053069	cpx	Na0.02Ca0.68Fe''0.26Mg0.93Fe'''0.04Ti0.00Al0.16Si1.91O6	51.7821	0.109351	3.74271	1.3107	0	8.57249	0	16.9251	17.325	0.232515	0	0
2000	1119	0.043671	0.10033	-550.25	0.013412	0.051751	cpx	Na0.02Ca0.68Fe''0.27Mg0.93Fe'''0.04Ti0.00Al0.16Si1.91O6	51.7684	0.110851	3.74182	1.31636	0	8.60788	0	16.8888	17.3323	0.233594	0	0
2000	1118	0.042605	0.097835	-536.663	0.013082	0.050472	cpx	Na0.02Ca0.68Fe''0.27Mg0.93Fe'''0.04Ti0.00Al0.16Si1.91O6	51.7546	0.112366	3.74096	1.32205	0	8.64331	0	16.8524	17.3396	0.234677	0	0
2000	1117	0.041569	0.095412	-523.465	0.012761	0.04923	cpx	Na0.02Ca0.68Fe''0.27Mg0.92Fe'''0.04Ti0.00Al0.16Si1.91O6	51.7408	0.113898	3.74011	1.32776	0	8.67878	0	16.8159	17.347	0.235765	0	0
2000	1116	0.040562	0.093058	-510.643	0.012449	0.048023	cpx	Na0.02Ca0.68Fe''0.27Mg0.92Fe'''0.04Ti0.00Al0.16Si1.91O6	51.727	0.115446	3.73928	1.33351	0	8.7143	0	16.7792	17.3544	0.236859	0	0
2000	1115	0.039584	0.090772	-498.187	0.012147	0.04685	cpx	Na0.02Ca0.69Fe''0.27Mg0.92Fe'''0.04Ti0.00Al0.16Si1.91O6	51.713	0.11701	3.73846	1.33928	0	8.74986	0	16.7425	17.3619	0.237957	0	0
2000	1114	0.038634	0.088551	-486.084	0.011852	0.045711	cpx	Na0.02Ca0.69Fe''0.27Mg0.92Fe'''0.04Ti0.00Al0.16Si1.91O6	51.699	0.118591	3.73767	1.34509	0	8.78546	0	16.7057	17.3694	0.23906	0	0
2000	1113	0.03771	0.086392	-474.322	0.011566	0.044604	cpx	Na0.02Ca0.69Fe''0.27Mg0.92Fe'''0.04Ti0.00Al0.16Si1.91O6	51.685	0.120189	3.73689	1.35092	0	8.82112	0	16.6687	17.377	0.240168	0	0
2000	1112	0.036812	0.084295	-462.892	0.011289	0.043528	cpx	Na0.02Ca0.69Fe''0.27Mg0.91Fe'''0.04Ti0.00Al0.16Si1.91O6	51.6709	0.121804	3.73614	1.35678	0	8.85682	0	16.6317	17.3846	0.241282	0	0
2000	1111	0.035938	0.082258	-451.782	0.011019	0.042482	cpx	Na0.02Ca0.69Fe''0.27Mg0.91Fe'''0.04Ti0.00Al0.16Si1.91O6	51.6567	0.123437	3.7354	1.36268	0	8.89258	0	16.5945	17.3923	0.2424	0	0
2000	1110	0.03509	0.080277	-440.983	0.010756	0.041465	cpx	Na0.02Ca0.69Fe''0.28Mg0.91Fe'''0.04Ti0.00Al0.16Si1.91O6	51.6425	0.125087	3.73468	1.36861	0	8.9284	0	16.5572	17.4	0.243524	0	0
2000	1109	0.034264	0.078352	-430.484	0.010501	0.040477	cpx	Na0.02Ca0.69Fe''0.28Mg0.91Fe'''0.04Ti0.00Al0.16Si1.90O6	51.6282	0.126754	3.73397	1.37456	0	8.96427	0	16.5199	17.4077	0.244653	0	0
2000	1108	0.033461	0.076481	-420.278	0.010253	0.039517	cpx	Na0.02Ca0.69Fe''0.28Mg0.91Fe'''0.04Ti0.00Al0.16Si1.90O6	51.6138	0.12844	3.73329	1.38056	0	9.0002	0	16.4824	17.4155	0.245788	0	0
2000	1107	0.032681	0.074661	-410.353	0.010011	0.038583	cpx	Na0.02Ca0.69Fe''0.28Mg0.90Fe'''0.04Ti0.00Al0.16Si1.90O6	51.5994	0.130144	3.73263	1.38658	0	9.0362	0	16.4448	17.4233	0.246927	0	0
2000	1106	0.031922	0.072892	-400.702	0.009777	0.037674	cpx	Na0.02Ca0.69Fe''0.28Mg0.90Fe'''0.04Ti0.00Al0.16Si1.90O6	51.5849	0.131867	3.73198	1.39264	0	9.07226	0	16.4071	17.4312	0.248072	0	0
2000	1105	0.031183	0.071173	-391.317	0.009548	0.036791	cpx	Na0.02Ca0.69Fe''0.28Mg0.90Fe'''0.04Ti0.00Al0.16Si1.90O6	51.5704	0.133608	3.73135	1.39874	0	9.10839	0	16.3693	17.4391	0.249223	0	0
2000	1104	0.030465	0.0695	-382.189	0.009326	0.035932	cpx	Na0.02Ca0.69Fe''0.28Mg0.90Fe'''0.04Ti0.00Al0.16Si1.90O6	51.5557	0.135369	3.73075	1.40487	0	9.14458	0	16.3313	17.447	0.250379	0	0
2000	1103	0.029766	0.067874	-373.311	0.00911	0.035096	cpx	Na0.02Ca0.69Fe''0.28Mg0.90Fe'''0.04Ti0.00Al0.16Si1.90O6	51.541	0.137149	3.73016	1.41103	0	9.18085	0	16.2933	17.455	0.251541	0	0
2000	1102	0.029086	0.066292	-364.674	0.0089	0.034284	cpx	Na0.02Ca0.69Fe''0.28Mg0.90Fe'''0.04Ti0.00Al0.16Si1.90O6	51.5263	0.138948	3.72959	1.41723	0	9.21719	0	16.2551	17.4629	0.252708	0	0
2000	1101	0.028424	0.064753	-356.272	0.008696	0.033493	cpx	Na0.02Ca0.69Fe''0.29Mg0.89Fe'''0.04Ti0.00Al0.16Si1.90O6	51.5114	0.140767	3.72904	1.42347	0	9.2536	0	16.2168	17.471	0.253881	0	0
2000	1100	0.027781	0.063257	-348.098	0.008497	0.032724	cpx	Na0.02Ca0.69Fe''0.29Mg0.89Fe'''0.04Ti0.00Al0.16Si1.90O6	51.4965	0.142606	3.72851	1.42975	0	9.29009	0	16.1784	17.479	0.255059	0	0
2000	1099	0.027154	0.0618	-340.145	0.008304	0.031976	cpx	Na0.02Ca0.69Fe''0.29Mg0.89Fe'''0.04Ti0.00Al0.16Si1.90O6	51.4815	0.144466	3.728	1.43606	0	9.32667	0	16.1399	17.4871	0.256244	0	0
2000	1098	0.026544	0.060384	-332.406	0.008116	0.031247	cpx	Na0.02Ca0.69Fe''0.29Mg0.89Fe'''0.04Ti0.00Al0.16Si1.90O6	51.4665	0.146346	3.72751	1.44241	0	9.36332	0	16.1013	17.4952	0.257434	0	0
2000	1097	0.025951	0.059006	-324.875	0.007932	0.030539	cpx	Na0.02Ca0.69Fe''0.29Mg0.89Fe'''0.04Ti0.00Al0.16Si1.90O6	51.4513	0.148247	3.72703	1.4488	0	9.40006	0	16.0625	17.5033	0.25863	0	0
2000	1096	0.025373	0.057665	-317.545	0.007754	0.029849	cpx	Na0.02Ca0.69Fe''0.29Mg0.88Fe'''0.04Ti0.00Al0.16Si1.90O6	51.4361	0.15017	3.72658	1.45524	0	9.43689	0	16.0237	17.5115	0.259832	0	0
2000	1095	0.024811	0.05636	-310.412	0.007581	0.029178	cpx	Na0.02Ca0.69Fe''0.29Mg0.88Fe'''0.04Ti0.00Al0.16Si1.90O6	51.4209	0.152113	3.72615	1.46171	0	9.47381	0	15.9847	17.5196	0.26104	0	0
2000	1094	0.024263	0.055089	-303.468	0.007412	0.028525	cpx	Na0.02Ca0.70Fe''0.29Mg0.88Fe'''0.04Ti0.00Al0.16Si1.90O6	51.4055	0.154079	3.72574	1.46822	0	9.51081	0	15.9456	17.5278	0.262254	0	0
2000	1093	0.02373	0.053853	-296.71	0.007247	0.027889	cpx	Na0.02Ca0.70Fe''0.30Mg0.88Fe'''0.04Ti0.00Al0.16Si1.90O6	51.3901	0.156067	3.72535	1.47478	0	9.54792	0	15.9063	17.5361	0.263474	0	0
2000	1092	0.023211	0.05265	-290.13	0.007087	0.02727	cpx	Na0.02Ca0.70Fe''0.30Mg0.88Fe'''0.04Ti0.00Al0.16Si1.90O6	51.3745	0.158077	3.72498	1.48138	0	9.58512	0	15.8669	17.5443	0.2647	0	0
2000	1091	0.022706	0.051479	-283.725	0.006931	0.026667	cpx	Na0.02Ca0.70Fe''0.30Mg0.87Fe'''0.04Ti0.00Al0.16Si1.90O6	51.3589	0.16011	3.72463	1.48802	0	9.62241	0	15.8274	17.5525	0.265932	0	0
2000	1090	0.022214	0.050339	-277.489	0.00678	0.026081	cpx	Na0.02Ca0.70Fe''0.30Mg0.87Fe'''0.04Ti0.00Al0.16Si1.90O6	51.3432	0.162166	3.7243	1.49471	0	9.65981	0	15.7878	17.5608	0.267171	0	0
2000	1089	0.021735	0.04923	-271.417	0.006632	0.02551	cpx	Na0.02Ca0.70Fe''0.30Mg0.87Fe'''0.04Ti0.00Al0.16Si1.90O6	51.3275	0.164246	3.72399	1.50144	0	9.69732	0	15.7481	17.5691	0.268416	0	0
2000	1088	0.021268	0.048149	-265.504	0.006488	0.024954	cpx	Na0.02Ca0.70Fe''0.30Mg0.87Fe'''0.04Ti0.00Al0.16Si1.90O6	51.3116	0.166349	3.7237	1.50822	0	9.73493	0	15.7082	17.5773	0.269667	0	0
2000	1087	0.020814	0.047097	-259.747	0.006348	0.024412	cpx	Na0.02Ca0.70Fe''0.30Mg0.87Fe'''0.04Ti0.00Al0.16Si1.90O6	51.2957	0.168476	3.72343	1.51504	0	9.77264	0	15.6682	17.5856	0.270924	0	0
2000	1086	0.020371	0.046073	-254.14	0.006212	0.023885	cpx	Na0.02Ca0.70Fe''0.30Mg0.86Fe'''0.04Ti0.00Al0.16Si1.90O6	51.2796	0.170628	3.72319	1.52191	0	9.81047	0	15.628	17.594	0.272188	0	0
2000	1085	0.01994	0.045076	-248.68	0.006079	0.023371	cpx	Na0.02Ca0.70Fe''0.31Mg0.86Fe'''0.04Ti0.00Al0.16Si1.90O6	51.2635	0.172804	3.72297	1.52883	0	9.84842	0	15.5877	17.6023	0.273459	0	0
2000	1084	0.019519	0.044105	-243.362	0.005949	0.022871	cpx	Na0.02Ca0.70Fe''0.31Mg0.86Fe'''0.04Ti0.00Al0.16Si1.90O6	51.2473	0.175006	3.72276	1.5358	0	9.88648	0	15.5473	17.6106	0.274736	0	0
2000	1083	0.01911	0.043159	-238.182	0.005823	0.022384	cpx	Na0.02Ca0.70Fe''0.31Mg0.86Fe'''0.04Ti0.00Al0.16Si1.90O6	51.231	0.177233	3.72258	1.54281	0	9.92466	0	15.5068	17.6189	0.27602	0	0
2000	1082	0.018712	0.042238	-233.137	0.0057	0.021909	cpx	Na0.02Ca0.70Fe''0.31Mg0.86Fe'''0.04Ti0.01Al0.16Si1.90O6	51.2146	0.179486	3.72243	1.54988	0	9.96296	0	15.4661	17.6273	0.277311	0	0
2000	1081	0.018323	0.041341	-228.222	0.005581	0.021447	cpx	Na0.02Ca0.70Fe''0.31Mg0.85Fe'''0.04Ti0.01Al0.16Si1.90O6	51.1981	0.181766	3.72229	1.557	0	10.0014	0	15.4252	17.6356	0.278608	0	0
2000	1080	0.017945	0.040468	-223.435	0.005464	0.020997	cpx	Na0.02Ca0.70Fe''0.31Mg0.85Fe'''0.04Ti0.01Al0.16Si1.90O6	51.1815	0.184071	3.72218	1.56417	0	10.0399	0	15.3843	17.6439	0.279912	0	0
2000	1079	0.017576	0.039617	-218.771	0.005351	0.020559	cpx	Na0.02Ca0.70Fe''0.31Mg0.85Fe'''0.04Ti0.01Al0.16Si1.90O6	51.1649	0.186404	3.72209	1.57139	0	10.0786	0	15.3431	17.6523	0.281223	0	0
2000	1078	0.017217	0.038788	-214.227	0.00524	0.020131	cpx	Na0.02Ca0.70Fe''0.31Mg0.85Fe'''0.04Ti0.01Al0.16Si1.90O6	51.1481	0.188765	3.72202	1.57866	0	10.1174	0	15.3019	17.6606	0.282541	0	0
2000	1077	0.016867	0.03798	-209.8	0.005132	0.019715	cpx	Na0.02Ca0.70Fe''0.32Mg0.85Fe'''0.04Ti0.01Al0.16Si1.90O6	51.1312	0.191153	3.72197	1.58599	0	10.1564	0	15.2605	17.669	0.283866	0	0
2000	1076	0.016526	0.037194	-205.486	0.005027	0.01931	cpx	Na0.02Ca0.70Fe''0.32Mg0.84Fe'''0.04Ti0.01Al0.16Si1.90O6	51.1142	0.19357	3.72195	1.59338	0	10.1955	0	15.2189	17.6773	0.285199	0	0
2000	1075	0.016193	0.036428	-201.284	0.004925	0.018915	cpx	Na0.02Ca0.70Fe''0.32Mg0.84Fe'''0.04Ti0.01Al0.16Si1.90O6	51.0971	0.196015	3.72195	1.60082	0	10.2347	0	15.1772	17.6857	0.286538	0	0
2000	1074	0.015869	0.035681	-197.189	0.004825	0.01853	cpx	Na0.02Ca0.71Fe''0.32Mg0.84Fe'''0.05Ti0.01Al0.16Si1.90O6	51.0799	0.198489	3.72198	1.60832	0	10.274	0	15.1353	17.694	0.287884	0	0
2000	1073	0.015553	0.034954	-193.198	0.004728	0.018154	cpx	Na0.02Ca0.71Fe''0.32Mg0.84Fe'''0.05Ti0.01Al0.16Si1.90O6	51.0627	0.200993	3.72203	1.61587	0	10.3136	0	15.0933	17.7023	0.289238	0	0
2000	1072	0.015246	0.034245	-189.31	0.004634	0.017789	cpx	Na0.02Ca0.71Fe''0.32Mg0.84Fe'''0.05Ti0.01Al0.16Si1.90O6	51.0453	0.203527	3.7221	1.62349	0	10.3532	0	15.0512	17.7106	0.290599	0	0
2000	1071	0.014946	0.033555	-185.52	0.004541	0.017433	cpx	Na0.02Ca0.71Fe''0.32Mg0.83Fe'''0.05Ti0.01Al0.16Si1.90O6	51.0277	0.206092	3.7222	1.63116	0	10.393	0	15.0089	17.719	0.291968	0	0
2000	1070	0.014653	0.032882	-181.828	0.004451	0.017086	cpx	Na0.02Ca0.71Fe''0.32Mg0.83Fe'''0.05Ti0.01Al0.16Si1.90O6	51.0101	0.208687	3.72232	1.63889	0	10.433	0	14.9664	17.7273	0.293344	0	0
2000	1069	0.014368	0.032227	-178.229	0.004364	0.016747	cpx	Na0.02Ca0.71Fe''0.33Mg0.83Fe'''0.05Ti0.01Al0.16Si1.90O6	50.9924	0.211314	3.72247	1.64669	0	10.4731	0	14.9237	17.7356	0.294728	0	0
2000	1068	0.014091	0.031588	-174.721	0.004278	0.016418	cpx	Na0.02Ca0.71Fe''0.33Mg0.83Fe'''0.05Ti0.01Al0.16Si1.90O6	50.9746	0.213973	3.72264	1.65455	0	10.5134	0	14.881	17.7438	0.296119	0	0
2000	1067	0.01382	0.030965	-171.303	0.004195	0.016097	cpx	Na0.02Ca0.71Fe''0.33Mg0.82Fe'''0.05Ti0.01Al0.16Si1.90O6	50.9566	0.216664	3.72284	1.66247	0	10.5538	0	14.838	17.7521	0.297518	0	0
2000	1066	0.013556	0.030359	-167.971	0.004114	0.015783	cpx	Na0.02Ca0.71Fe''0.33Mg0.82Fe'''0.05Ti0.01Al0.16Si1.90O6	50.9385	0.219388	3.72306	1.67046	0	10.5944	0	14.7949	17.7604	0.298925	0	0
2000	1065	0.013299	0.029768	-164.724	0.004035	0.015478	cpx	Na0.02Ca0.71Fe''0.33Mg0.82Fe'''0.05Ti0.01Al0.16Si1.90O6	50.9203	0.222146	3.72331	1.67851	0	10.6352	0	14.7516	17.7686	0.30034	0	0
2000	1064	0.013048	0.029192	-161.558	0.003958	0.015181	cpx	Na0.02Ca0.71Fe''0.33Mg0.82Fe'''0.05Ti0.01Al0.16Si1.90O6	50.902	0.224937	3.72359	1.68663	0	10.6761	0	14.7081	17.7768	0.301763	0	0
2000	1063	0.012803	0.02863	-158.473	0.003883	0.014891	cpx	Na0.02Ca0.71Fe''0.33Mg0.82Fe'''0.05Ti0.01Al0.16Si1.90O6	50.8836	0.227763	3.72389	1.69481	0	10.7173	0	14.6645	17.785	0.303194	0	0
2000	1062	0.012565	0.028083	-155.466	0.00381	0.014609	cpx	Na0.02Ca0.71Fe''0.34Mg0.81Fe'''0.05Ti0.01Al0.16Si1.90O6	50.865	0.230624	3.72422	1.70307	0	10.7585	0	14.6207	17.7932	0.304632	0	0
2000	1061	0.012333	0.02755	-152.535	0.003738	0.014333	cpx	Na0.02Ca0.71Fe''0.34Mg0.81Fe'''0.05Ti0.01Al0.16Si1.90O6	50.8463	0.233521	3.72457	1.71139	0	10.8	0	14.5767	17.8014	0.306079	0	0
2000	1060	0.012106	0.027031	-149.678	0.003669	0.014065	cpx	Na0.02Ca0.71Fe''0.34Mg0.81Fe'''0.05Ti0.01Al0.16Si1.90O6	50.8275	0.236454	3.72496	1.71979	0	10.8417	0	14.5326	17.8095	0.307535	0	0
2000	1059	0.011886	0.026524	-146.893	0.003601	0.013803	cpx	Na0.02Ca0.71Fe''0.34Mg0.81Fe'''0.05Ti0.01Al0.16Si1.90O6	50.8085	0.239424	3.72537	1.72826	0	10.8835	0	14.4882	17.8177	0.308998	0	0
2000	1058	0.01167	0.026031	-144.178	0.003535	0.013548	cpx	Na0.02Ca0.71Fe''0.34Mg0.80Fe'''0.05Ti0.01Al0.16Si1.90O6	50.7895	0.242431	3.7258	1.7368	0	10.9255	0	14.4437	17.8258	0.31047	0	0
2000	1057	0.01146	0.02555	-141.531	0.00347	0.0133	cpx	Na0.02Ca0.71Fe''0.34Mg0.80Fe'''0.05Ti0.01Al0.16Si1.90O6	50.7703	0.245476	3.72627	1.74542	0	10.9678	0	14.399	17.8339	0.311951	0	0
2000	1056	0.011256	0.025081	-138.952	0.003408	0.013057	cpx	Na0.02Ca0.71Fe''0.34Mg0.80Fe'''0.05Ti0.01Al0.16Si1.90O6	50.7509	0.248559	3.72676	1.75411	0	11.0102	0	14.3542	17.8419	0.31344	0	0
2000	1055	0.011057	0.024624	-136.437	0.003346	0.012821	cpx	Na0.02Ca0.72Fe''0.35Mg0.80Fe'''0.05Ti0.01Al0.16Si1.90O6	50.7314	0.251682	3.72729	1.76288	0	11.0528	0	14.3091	17.8499	0.314938	0	0
2000	1054	0.010862	0.024179	-133.986	0.003287	0.012591	cpx	Na0.02Ca0.72Fe''0.35Mg0.80Fe'''0.05Ti0.01Al0.16Si1.90O6	50.7118	0.254845	3.72784	1.77172	0	11.0956	0	14.2638	17.8579	0.316445	0	0
2000	1053	0.010673	0.023745	-131.597	0.003228	0.012367	cpx	Na0.02Ca0.72Fe''0.35Mg0.79Fe'''0.05Ti0.01Al0.16Si1.90O6	50.692	0.258048	3.72842	1.78065	0	11.1386	0	14.2184	17.8659	0.31796	0	0
2000	1052	0.010488	0.023322	-129.267	0.003172	0.012148	cpx	Na0.02Ca0.72Fe''0.35Mg0.79Fe'''0.05Ti0.01Al0.16Si1.90O6	50.6721	0.261293	3.72904	1.78966	0	11.1818	0	14.1727	17.8739	0.319485	0	0
2000	1051	0.010308	0.02291	-126.997	0.003116	0.011935	cpx	Na0.02Ca0.72Fe''0.35Mg0.79Fe'''0.05Ti0.01Al0.16Si1.90O6	50.6521	0.264579	3.72968	1.79874	0	11.2252	0	14.1269	17.8818	0.321018	0	0
2000	1050	0.010132	0.022508	-124.784	0.003063	0.011727	cpx	Na0.02Ca0.72Fe''0.35Mg0.79Fe'''0.05Ti0.01Al0.16Si1.90O6	50.6319	0.267908	3.73035	1.80792	0	11.2689	0	14.0809	17.8897	0.322561	0	0
2000	1049	0.009961	0.022116	-122.627	0.00301	0.011524	cpx	Na0.02Ca0.72Fe''0.35Mg0.78Fe'''0.05Ti0.01Al0.16Si1.90O6	50.6115	0.27128	3.73105	1.81717	0	11.3127	0	14.0346	17.8975	0.324113	0	0
2000	1048	0.009902	0.021973	-121.844	0.002991	0.011451	cpx	Na0.02Ca0.72Fe''0.36Mg0.78Fe'''0.05Ti0.01Al0.16Si1.90O6	50.5911	0.27468	3.73175	1.82647	0	11.3567	0	13.9883	17.9053	0.325671	0	0
2000	1047	0.009921	0.022005	-122.037	0.002996	0.011469	cpx	Na0.02Ca0.72Fe''0.36Mg0.78Fe'''0.05Ti0.01Al0.16Si1.90O6	50.5706	0.278094	3.73239	1.83579	0	11.4008	0	13.9419	17.9131	0.327234	0	0
2000	1046	0.009768	0.021653	-120.098	0.002949	0.011287	cpx	Na0.02Ca0.72Fe''0.36Mg0.78Fe'''0.05Ti0.01Al0.16Si1.90O6	50.5501	0.281548	3.73306	1.84519	0	11.4451	0	13.8954	17.9209	0.328805	0	0
2000	1045	0.009614	0.021302	-118.161	0.002902	0.011106	cpx	Na0.02Ca0.72Fe''0.36Mg0.77Fe'''0.05Ti0.01Al0.17Si1.90O6	50.5294	0.285044	3.73376	1.85467	0	11.4895	0	13.8486	17.9286	0.330386	0	0
2000	1044	0.009464	0.020959	-116.269	0.002856	0.010928	cpx	Na0.02Ca0.72Fe''0.36Mg0.77Fe'''0.05Ti0.01Al0.17Si1.90O6	50.5085	0.288582	3.73449	1.86423	0	11.5343	0	13.8017	17.9363	0.331977	0	0
2000	1043	0.009318	0.020625	-114.428	0.002811	0.010755	cpx	Na0.02Ca0.72Fe''0.36Mg0.77Fe'''0.05Ti0.01Al0.17Si1.89O6	50.4875	0.292165	3.73524	1.87388	0	11.5792	0	13.7546	17.9439	0.333576	0	0
2000	1042	0.009176	0.0203	-112.636	0.002768	0.010587	cpx	Na0.02Ca0.72Fe''0.36Mg0.77Fe'''0.05Ti0.01Al0.17Si1.89O6	50.4663	0.295792	3.73602	1.88363	0	11.6244	0	13.7072	17.9515	0.335185	0	0
2000	1041	0.009038	0.019983	-110.892	0.002725	0.010423	cpx	Na0.02Ca0.72Fe''0.37Mg0.76Fe'''0.05Ti0.01Al0.17Si1.89O6	50.445	0.299463	3.73682	1.89346	0	11.6698	0	13.6596	17.9591	0.336804	0	0
2000	1040	0.008903	0.019676	-109.195	0.002684	0.010264	cpx	Na0.02Ca0.72Fe''0.37Mg0.76Fe'''0.05Ti0.01Al0.17Si1.89O6	50.4235	0.303179	3.73766	1.90338	0	11.7154	0	13.6119	17.9666	0.338432	0	0
2000	1039	0.008773	0.019376	-107.543	0.002644	0.010109	cpx	Na0.02Ca0.72Fe''0.37Mg0.76Fe'''0.05Ti0.01Al0.17Si1.89O6	50.4019	0.306942	3.73852	1.91339	0	11.7613	0	13.5639	17.974	0.340069	0	0
2000	1038	0.008645	0.019085	-105.937	0.002605	0.009959	cpx	Na0.02Ca0.72Fe''0.37Mg0.76Fe'''0.05Ti0.01Al0.17Si1.89O6	50.3801	0.31075	3.73941	1.9235	0	11.8074	0	13.5157	17.9814	0.341717	0	0
2000	1037	0.008522	0.018802	-104.375	0.002567	0.009812	cpx	Na0.03Ca0.72Fe''0.37Mg0.75Fe'''0.05Ti0.01Al0.17Si1.89O6	50.3581	0.314605	3.74032	1.9337	0	11.8537	0	13.4673	17.9888	0.343374	0	0
2000	1036	0.008401	0.018527	-102.855	0.00253	0.00967	cpx	Na0.03Ca0.73Fe''0.37Mg0.75Fe'''0.06Ti0.01Al0.17Si1.89O6	50.336	0.318507	3.74126	1.944	0	11.9004	0	13.4187	17.9961	0.345041	0	0
2000	1035	0.008284	0.018259	-101.377	0.002494	0.009531	cpx	Na0.03Ca0.73Fe''0.38Mg0.75Fe'''0.06Ti0.01Al0.17Si1.89O6	50.3137	0.322456	3.74223	1.95439	0	11.9472	0	13.3699	18.0034	0.346718	0	0
2000	1034	0.00817	0.017999	-99.9406	0.002459	0.009396	cpx	Na0.03Ca0.73Fe''0.38Mg0.75Fe'''0.06Ti0.01Al0.17Si1.89O6	50.2913	0.326454	3.74323	1.96488	0	11.9943	0	13.3208	18.0106	0.348405	0	0
2000	1033	0.00806	0.017746	-98.5441	0.002425	0.009265	cpx	Na0.03Ca0.73Fe''0.38Mg0.74Fe'''0.06Ti0.01Al0.17Si1.89O6	50.2686	0.3305	3.74425	1.97547	0	12.0417	0	13.2715	18.0178	0.350102	0	0
2000	1032	0.007953	0.0175	-97.1868	0.002392	0.009138	cpx	Na0.03Ca0.73Fe''0.38Mg0.74Fe'''0.06Ti0.01Al0.17Si1.89O6	50.2459	0.334595	3.7453	1.98616	0	12.0893	0	13.2221	18.0249	0.351809	0	0
2000	1031	0.007848	0.017262	-95.8679	0.00236	0.009015	cpx	Na0.03Ca0.73Fe''0.38Mg0.74Fe'''0.06Ti0.01Al0.17Si1.89O6	50.2229	0.338739	3.74638	1.99695	0	12.1372	0	13.1723	18.032	0.353527	0	0
2000	1030	0.007747	0.01703	-94.5866	0.002329	0.008895	cpx	Na0.03Ca0.73Fe''0.38Mg0.74Fe'''0.06Ti0.01Al0.17Si1.89O6	50.1998	0.342932	3.74748	2.00784	0	12.1854	0	13.1224	18.039	0.355254	0	0
2000	1029	0.007649	0.016805	-93.342	0.002298	0.008778	cpx	Na0.03Ca0.73Fe''0.39Mg0.73Fe'''0.06Ti0.01Al0.17Si1.89O6	50.1765	0.347175	3.74861	2.01884	0	12.2338	0	13.0722	18.0459	0.356992	0	0
2000	1028	0.007553	0.016586	-92.1333	0.002269	0.008665	cpx	Na0.03Ca0.73Fe''0.39Mg0.73Fe'''0.06Ti0.01Al0.17Si1.89O6	50.153	0.351469	3.74976	2.02994	0	12.2825	0	13.0218	18.0528	0.358741	0	0
2000	1027	0.00746	0.016374	-90.9597	0.002241	0.008555	cpx	Na0.03Ca0.73Fe''0.39Mg0.73Fe'''0.06Ti0.01Al0.17Si1.89O6	50.1293	0.355812	3.75094	2.04115	0	12.3315	0	12.9712	18.0596	0.360499	0	0
2000	1026	0.007371	0.016168	-89.8204	0.002213	0.008448	cpx	Na0.03Ca0.73Fe''0.39Mg0.73Fe'''0.06Ti0.01Al0.17Si1.89O6	50.1055	0.360207	3.75214	2.05246	0	12.3807	0	12.9203	18.0664	0.362268	0	0
2000	1025	0.007283	0.015968	-88.7146	0.002186	0.008345	cpx	Na0.03Ca0.73Fe''0.39Mg0.72Fe'''0.06Ti0.01Al0.17Si1.89O6	50.0815	0.364651	3.75336	2.06389	0	12.4302	0	12.8693	18.0731	0.364048	0	0
2000	1024	0.007199	0.015774	-87.6417	0.00216	0.008244	cpx	Na0.03Ca0.73Fe''0.39Mg0.72Fe'''0.06Ti0.01Al0.17Si1.89O6	50.0573	0.369147	3.75461	2.07542	0	12.48	0	12.8179	18.0797	0.365838	0	0
2000	1023	0.007116	0.015584	-86.5947	0.002135	0.008146	cpx	Na0.03Ca0.73Fe''0.40Mg0.72Fe'''0.06Ti0.01Al0.17Si1.89O6	50.0329	0.373693	3.75588	2.08706	0	12.5301	0	12.7664	18.0863	0.367639	0	0
2000	1022	0.007035	0.015399	-85.5661	0.00211	0.00805	cpx	Na0.03Ca0.73Fe''0.40Mg0.72Fe'''0.06Ti0.01Al0.17Si1.89O6	50.0084	0.37829	3.75717	2.09881	0	12.5805	0	12.7146	18.0928	0.36945	0	0
2000	1021	0.006957	0.015218	-84.5681	0.002086	0.007956	cpx	Na0.03Ca0.73Fe''0.40Mg0.71Fe'''0.06Ti0.01Al0.17Si1.89O6	49.9837	0.382937	3.75849	2.11067	0	12.6312	0	12.6625	18.0992	0.371272	0	0
2000	1020	0.00688	0.015044	-83.6002	0.002062	0.007866	cpx	Na0.03Ca0.73Fe''0.40Mg0.71Fe'''0.06Ti0.01Al0.17Si1.89O6	49.9588	0.387635	3.75982	2.12265	0	12.6822	0	12.6103	18.1056	0.373104	0	0
2000	1019	0.006807	0.014874	-82.6619	0.002039	0.007778	cpx	Na0.03Ca0.73Fe''0.40Mg0.71Fe'''0.06Ti0.01Al0.17Si1.89O6	49.9337	0.392383	3.76117	2.13474	0	12.7335	0	12.5578	18.1118	0.374947	0	0
2000	1018	0.006735	0.01471	-81.7524	0.002017	0.007693	cpx	Na0.03Ca0.73Fe''0.40Mg0.71Fe'''0.06Ti0.01Al0.17Si1.89O6	49.9084	0.397181	3.76254	2.14694	0	12.785	0	12.505	18.118	0.3768	0	0
2000	1017	0.006666	0.014551	-80.871	0.001996	0.007611	cpx	Na0.03Ca0.73Fe''0.41Mg0.70Fe'''0.06Ti0.01Al0.17Si1.89O6	49.883	0.402029	3.76392	2.15926	0	12.8369	0	12.4521	18.1242	0.378664	0	0
2000	1016	0.006599	0.014397	-80.017	0.001975	0.007531	cpx	Na0.03Ca0.74Fe''0.41Mg0.70Fe'''0.06Ti0.01Al0.17Si1.89O6	49.8573	0.406925	3.76532	2.17169	0	12.8891	0	12.3988	18.1302	0.380539	0	0
2000	1015	0.006534	0.014248	-79.1898	0.001955	0.007454	cpx	Na0.03Ca0.74Fe''0.41Mg0.70Fe'''0.06Ti0.01Al0.17Si1.89O6	49.8315	0.41187	3.76673	2.18424	0	12.9416	0	12.3454	18.1362	0.382424	0	0
2000	1014	0.006472	0.014103	-78.3889	0.001936	0.007379	cpx	Na0.03Ca0.74Fe''0.41Mg0.69Fe'''0.06Ti0.01Al0.17Si1.89O6	49.8056	0.416862	3.76815	2.19691	0	12.9944	0	12.2917	18.1421	0.384319	0	0
2000	1013	0.006411	0.013963	-77.6135	0.001917	0.007306	cpx	Na0.03Ca0.74Fe''0.41Mg0.69Fe'''0.06Ti0.01Al0.17Si1.89O6	49.7794	0.4219	3.76959	2.20969	0	13.0476	0	12.2377	18.1479	0.386225	0	0
2000	1012	0.006352	0.013828	-76.8632	0.001899	0.007236	cpx	Na0.03Ca0.74Fe''0.42Mg0.69Fe'''0.06Ti0.01Al0.17Si1.89O6	49.7531	0.426985	3.77103	2.22259	0	13.101	0	12.1836	18.1536	0.388142	0	0
2000	1011	0.006296	0.013697	-76.1376	0.001882	0.007169	cpx	Na0.03Ca0.74Fe''0.42Mg0.69Fe'''0.06Ti0.01Al0.17Si1.89O6	49.7266	0.432113	3.77248	2.23561	0	13.1548	0	12.1292	18.1592	0.390068	0	0
2000	1010	0.006241	0.013571	-75.4361	0.001865	0.007103	cpx	Na0.03Ca0.74Fe''0.42Mg0.68Fe'''0.06Ti0.01Al0.17Si1.89O6	49.6999	0.437285	3.77394	2.24874	0	13.2089	0	12.0745	18.1648	0.392005	0	0
2000	1009	0.006189	0.013449	-74.7586	0.001848	0.00704	cpx	Na0.03Ca0.74Fe''0.42Mg0.68Fe'''0.06Ti0.01Al0.17Si1.89O6	49.673	0.442498	3.77539	2.26199	0	13.2633	0	12.0196	18.1702	0.393952	0	0
2000	1008	0.006138	0.013332	-74.105	0.001833	0.006979	cpx	Na0.03Ca0.74Fe''0.42Mg0.68Fe'''0.07Ti0.01Al0.17Si1.88O6	49.646	0.447751	3.77685	2.27536	0	13.3181	0	11.9645	18.1755	0.39591	0	0
2000	1007	0.006089	0.013218	-73.4755	0.001817	0.006921	cpx	Na0.03Ca0.74Fe''0.42Mg0.67Fe'''0.07Ti0.01Al0.17Si1.88O6	49.6188	0.453041	3.7783	2.28885	0	13.3732	0	11.9091	18.1808	0.397876	0	0
2000	1006	0.006042	0.013109	-72.8705	0.001803	0.006864	cpx	Na0.03Ca0.74Fe''0.43Mg0.67Fe'''0.07Ti0.01Al0.17Si1.88O6	49.5915	0.458365	3.77975	2.30245	0	13.4286	0	11.8536	18.1859	0.399853	0	0
2000	1005	0.005998	0.013005	-72.2911	0.001789	0.00681	cpx	Na0.03Ca0.74Fe''0.43Mg0.67Fe'''0.07Ti0.01Al0.17Si1.88O6	49.564	0.463721	3.78119	2.31616	0	13.4844	0	11.7978	18.1909	0.401839	0	0
2000	1004	0.005955	0.012906	-71.7391	0.001776	0.006759	cpx	Na0.03Ca0.74Fe''0.43Mg0.67Fe'''0.07Ti0.01Al0.17Si1.88O6	49.5364	0.469105	3.78261	2.32999	0	13.5405	0	11.7417	18.1958	0.403834	0	0
2000	1003	0.005915	0.012813	-71.218	0.001763	0.006711	cpx	Na0.03Ca0.74Fe''0.43Mg0.66Fe'''0.07Ti0.01Al0.17Si1.88O6	49.5086	0.474513	3.78401	2.34392	0	13.597	0	11.6855	18.2006	0.405838	0	0
2000	1002	0.005879	0.012726	-70.7332	0.001752	0.006666	cpx	Na0.03Ca0.74Fe''0.43Mg0.66Fe'''0.07Ti0.01Al0.17Si1.88O6	49.4807	0.479936	3.78538	2.35796	0	13.6538	0	11.629	18.2053	0.407851	0	0
2000	1001	0.005846	0.012647	-70.2947	0.001741	0.006625	cpx	Na0.03Ca0.74Fe''0.44Mg0.66Fe'''0.07Ti0.01Al0.17Si1.88O6	49.4527	0.485369	3.78672	2.3721	0	13.711	0	11.5724	18.2099	0.409871	0	0
2000	1000	0.005818	0.01258	-69.9209	0.001732	0.006591	cpx	Na0.03Ca0.74Fe''0.44Mg0.65Fe'''0.07Ti0.01Al0.17Si1.88O6	49.4246	0.490796	3.788	2.38632	0	13.7685	0	11.5156	18.2143	0.411897	0	0
2000	999	0.005799	0.012531	-69.6493	0.001726	0.006566	cpx	Na0.03Ca0.74Fe''0.44Mg0.65Fe'''0.07Ti0.01Al0.17Si1.88O6	49.3965	0.496198	3.78921	2.40061	0	13.8263	0	11.4587	18.2185	0.413928	0	0
2000	998	0.005795	0.012517	-69.5659	0.001724	0.006559	cpx	Na0.03Ca0.74Fe''0.44Mg0.65Fe'''0.07Ti0.01Al0.17Si1.88O6	49.3685	0.501536	3.7903	2.41493	0	13.8844	0	11.4017	18.2226	0.415961	0	0
2000	997	0.005828	0.01258	-69.9166	0.001734	0.006593	cpx	Na0.03Ca0.74Fe''0.44Mg0.64Fe'''0.07Ti0.01Al0.17Si1.88O6	49.3407	0.506719	3.79117	2.42919	0	13.9428	0	11.3449	18.2265	0.417988	0	0
2000	996	0.005981	0.012903	-71.7102	0.001778	0.006762	cpx	Na0.03Ca0.74Fe''0.45Mg0.64Fe'''0.07Ti0.01Al0.17Si1.88O6	49.3139	0.51145	3.79148	2.44308	0	14.0013	0	11.2888	18.23	0.419984	0	0
2000	995	0.005816	0.01254	-69.6899	0.001729	0.006573	cpx	Na0.03Ca0.75Fe''0.45Mg0.64Fe'''0.07Ti0.01Al0.17Si1.88O6	49.2864	0.516439	3.79206	2.45735	0	14.0604	0	11.2319	18.2335	0.422009	0	0
2000	994	0.010238	0.022063	-122.627	0.003043	0.011566	cpx	Na0.03Ca0.75Fe''0.45Mg0.64Fe'''0.07Ti0.01Al0.17Si1.88O6	49.2847	0.510587	3.78039	2.46049	0	14.1119	0	11.1979	18.231	0.423112	0	0
2000	993	0.010079	0.021709	-120.676	0.002995	0.011383	cpx	Na0.03Ca0.75Fe''0.45Mg0.64Fe'''0.07Ti0.01Al0.17Si1.88O6	49.2829	0.504768	3.76876	2.46366	0	14.1636	0	11.1636	18.2284	0.424219	0	0
2000	992	0.009925	0.021366	-118.781	0.002948	0.011205	cpx	Na0.03Ca0.75Fe''0.45Mg0.63Fe'''0.07Ti0.01Al0.17Si1.88O6	49.2809	0.498984	3.75717	2.46687	0	14.2156	0	11.1293	18.2259	0.42533	0	0
2000	991	0.009775	0.021033	-116.941	0.002903	0.011033	cpx	Na0.03Ca0.75Fe''0.46Mg0.63Fe'''0.07Ti0.01Al0.17Si1.88O6	49.2789	0.493234	3.74563	2.47012	0	14.2677	0	11.0947	18.2232	0.426445	0	0
2000	990	0.00963	0.020709	-115.155	0.002859	0.010865	cpx	Na0.03Ca0.75Fe''0.46Mg0.63Fe'''0.07Ti0.01Al0.17Si1.88O6	49.2767	0.487518	3.73413	2.4734	0	14.32	0	11.06	18.2206	0.427564	0	0
2000	989	0.009489	0.020395	-113.42	0.002817	0.010702	cpx	Na0.03Ca0.75Fe''0.46Mg0.63Fe'''0.07Ti0.01Al0.17Si1.88O6	49.2744	0.481836	3.72267	2.47672	0	14.3726	0	11.0252	18.2179	0.428687	0	0
2000	988	0.009352	0.02009	-111.736	0.002776	0.010544	cpx	Na0.03Ca0.75Fe''0.46Mg0.63Fe'''0.07Ti0.01Al0.17Si1.88O6	49.272	0.476187	3.71125	2.48008	0	14.4253	0	10.9902	18.2152	0.429813	0	0
2000	987	0.009219	0.019793	-110.1	0.002736	0.010391	cpx	Na0.03Ca0.75Fe''0.46Mg0.62Fe'''0.07Ti0.01Al0.17Si1.88O6	49.2695	0.470571	3.69987	2.48347	0	14.4783	0	10.955	18.2124	0.430944	0	0
2000	986	0.00909	0.019506	-108.512	0.002697	0.010242	cpx	Na0.03Ca0.75Fe''0.46Mg0.62Fe'''0.07Ti0.01Al0.17Si1.88O6	49.2669	0.464989	3.68853	2.4869	0	14.5314	0	10.9197	18.2096	0.432078	0	0
2000	985	0.008964	0.019226	-106.97	0.002659	0.010097	cpx	Na0.03Ca0.75Fe''0.47Mg0.62Fe'''0.07Ti0.01Al0.17Si1.88O6	49.2641	0.459439	3.67724	2.49037	0	14.5848	0	10.8842	18.2067	0.433216	0	0
2000	984	0.008843	0.018955	-105.472	0.002622	0.009956	cpx	Na0.03Ca0.75Fe''0.47Mg0.62Fe'''0.07Ti0.01Al0.17Si1.88O6	49.2612	0.453922	3.66597	2.49388	0	14.6383	0	10.8485	18.2038	0.434358	0	0
2000	983	0.008725	0.018692	-104.018	0.002587	0.00982	cpx	Na0.03Ca0.75Fe''0.47Mg0.62Fe'''0.07Ti0.01Al0.16Si1.88O6	49.2582	0.448437	3.65475	2.49742	0	14.6921	0	10.8127	18.2008	0.435504	0	0
2000	982	0.00861	0.018437	-102.606	0.002552	0.009688	cpx	Na0.03Ca0.75Fe''0.47Mg0.61Fe'''0.07Ti0.01Al0.16Si1.89O6	49.2551	0.442984	3.64357	2.501	0	14.7461	0	10.7768	18.1978	0.436654	0	0
2000	981	0.008499	0.018188	-101.236	0.002519	0.009559	cpx	Na0.03Ca0.75Fe''0.47Mg0.61Fe'''0.07Ti0.01Al0.16Si1.89O6	49.2519	0.437564	3.63242	2.50463	0	14.8003	0	10.7406	18.1948	0.437808	0	0
2000	980	0.008391	0.017948	-99.9051	0.002486	0.009434	cpx	Na0.03Ca0.75Fe''0.48Mg0.61Fe'''0.07Ti0.01Al0.16Si1.89O6	49.2485	0.432175	3.62131	2.50828	0	14.8547	0	10.7044	18.1917	0.438966	0	0
2000	979	0.008286	0.017714	-98.6133	0.002454	0.009313	cpx	Na0.03Ca0.75Fe''0.48Mg0.61Fe'''0.07Ti0.01Al0.16Si1.89O6	49.245	0.426818	3.61023	2.51198	0	14.9094	0	10.6679	18.1885	0.440128	0	0
2000	978	0.008184	0.017487	-97.3591	0.002424	0.009195	cpx	Na0.03Ca0.75Fe''0.48Mg0.61Fe'''0.07Ti0.01Al0.16Si1.89O6	49.2415	0.421493	3.59919	2.51572	0	14.9642	0	10.6313	18.1853	0.441294	0	0
2000	977	0.008085	0.017267	-96.1418	0.002394	0.009081	cpx	Na0.03Ca0.75Fe''0.48Mg0.61Fe'''0.07Ti0.01Al0.16Si1.89O6	49.2377	0.4162	3.58818	2.51949	0	15.0193	0	10.5946	18.182	0.442464	0	0
2000	976	0.00799	0.017053	-94.9601	0.002365	0.008971	cpx	Na0.03Ca0.75Fe''0.48Mg0.60Fe'''0.07Ti0.01Al0.16Si1.89O6	49.2339	0.410937	3.57721	2.5233	0	15.0746	0	10.5577	18.1787	0.443638	0	0
2000	975	0.007897	0.016845	-93.8132	0.002337	0.008863	cpx	Na0.03Ca0.75Fe''0.49Mg0.60Fe'''0.07Ti0.01Al0.16Si1.89O6	49.23	0.405706	3.56628	2.52715	0	15.1301	0	10.5206	18.1754	0.444815	0	0
2000	974	0.007807	0.016644	-92.7002	0.00231	0.008759	cpx	Na0.03Ca0.75Fe''0.49Mg0.60Fe'''0.07Ti0.01Al0.16Si1.89O6	49.2259	0.400507	3.55538	2.53104	0	15.1859	0	10.4833	18.172	0.445997	0	0
2000	973	0.007719	0.016449	-91.6202	0.002283	0.008658	cpx	Na0.03Ca0.75Fe''0.49Mg0.60Fe'''0.07Ti0.01Al0.16Si1.89O6	49.2217	0.395338	3.54451	2.53496	0	15.2418	0	10.446	18.1685	0.447183	0	0
2000	972	0.007634	0.016259	-90.5722	0.002258	0.00856	cpx	Na0.03Ca0.75Fe''0.49Mg0.60Fe'''0.07Ti0.01Al0.16Si1.89O6	49.2175	0.3902	3.53367	2.53893	0	15.298	0	10.4084	18.165	0.448373	0	0
2000	971	0.007552	0.016075	-89.5555	0.002233	0.008464	cpx	Na0.03Ca0.75Fe''0.49Mg0.59Fe'''0.07Ti0.01Al0.16Si1.89O6	49.213	0.385093	3.52286	2.54293	0	15.3544	0	10.3707	18.1614	0.449566	0	0
2000	970	0.007473	0.015897	-88.5692	0.002209	0.008372	cpx	Na0.03Ca0.75Fe''0.49Mg0.59Fe'''0.07Ti0.01Al0.16Si1.89O6	49.2085	0.380017	3.51209	2.54697	0	15.4111	0	10.3328	18.1577	0.450764	0	0
2000	969	0.007395	0.015724	-87.6126	0.002185	0.008282	cpx	Na0.03Ca0.75Fe''0.50Mg0.59Fe'''0.07Ti0.01Al0.16Si1.89O6	49.2039	0.374972	3.50135	2.55105	0	15.4679	0	10.2948	18.1541	0.451966	0	0
2000	968	0.00732	0.015556	-86.6849	0.002163	0.008196	cpx	Na0.03Ca0.75Fe''0.50Mg0.59Fe'''0.07Ti0.01Al0.16Si1.89O6	49.1991	0.369957	3.49063	2.55516	0	15.525	0	10.2566	18.1503	0.453171	0	0
2000	967	0.007248	0.015394	-85.7853	0.002141	0.008111	cpx	Na0.03Ca0.75Fe''0.50Mg0.59Fe'''0.07Ti0.01Al0.16Si1.89O6	49.1943	0.364973	3.47995	2.55932	0	15.5823	0	10.2183	18.1465	0.454381	0	0
2000	966	0.007178	0.015236	-84.9132	0.00212	0.00803	cpx	Na0.03Ca0.75Fe''0.50Mg0.58Fe'''0.07Ti0.01Al0.16Si1.89O6	49.1893	0.36002	3.4693	2.56351	0	15.6399	0	10.1798	18.1426	0.455595	0	0
2000	965	0.00711	0.015083	-84.0678	0.002099	0.007951	cpx	Na0.03Ca0.75Fe''0.50Mg0.58Fe'''0.07Ti0.01Al0.16Si1.89O6	49.1842	0.355096	3.45868	2.56774	0	15.6977	0	10.1411	18.1387	0.456812	0	0
2000	964	0.007044	0.014935	-83.2486	0.002079	0.007874	cpx	Na0.03Ca0.75Fe''0.51Mg0.58Fe'''0.07Ti0.01Al0.16Si1.89O6	49.179	0.350204	3.44808	2.57201	0	15.7557	0	10.1023	18.1347	0.458034	0	0
2000	963	0.00698	0.014792	-82.4548	0.00206	0.0078	cpx	Na0.03Ca0.75Fe''0.51Mg0.58Fe'''0.07Ti0.01Al0.16Si1.89O6	49.1737	0.345341	3.43752	2.57632	0	15.8139	0	10.0633	18.1306	0.459259	0	0
2000	962	0.006918	0.014653	-81.6858	0.002041	0.007728	cpx	Na0.03Ca0.75Fe''0.51Mg0.58Fe'''0.07Ti0.01Al0.16Si1.89O6	49.1682	0.34051	3.42698	2.58066	0	15.8724	0	10.0242	18.1265	0.460489	0	0
2000	961	0.006859	0.014518	-80.9411	0.002023	0.007659	cpx	Na0.03Ca0.75Fe''0.51Mg0.57Fe'''0.07Ti0.01Al0.16Si1.89O6	49.1627	0.335708	3.41646	2.58504	0	15.9311	0	9.98493	18.1224	0.461723	0	0
2000	960	0.006801	0.014388	-80.22	0.002005	0.007591	cpx	Na0.03Ca0.75Fe''0.51Mg0.57Fe'''0.08Ti0.01Al0.15Si1.89O6	49.157	0.330937	3.40598	2.58946	0	15.99	0	9.9455	18.1181	0.46296	0	0
2000	959	0.006745	0.014262	-79.522	0.001988	0.007526	cpx	Na0.03Ca0.75Fe''0.52Mg0.57Fe'''0.08Ti0.01Al0.15Si1.89O6	49.1513	0.326196	3.39552	2.59391	0	16.0492	0	9.90592	18.1138	0.464201	0	0
2000	958	0.006691	0.01414	-78.8466	0.001972	0.007463	cpx	Na0.03Ca0.75Fe''0.52Mg0.57Fe'''0.08Ti0.01Al0.15Si1.89O6	49.1454	0.321486	3.38509	2.5984	0	16.1085	0	9.86619	18.1095	0.465447	0	0
2000	957	0.006639	0.014022	-78.1932	0.001956	0.007402	cpx	Na0.03Ca0.75Fe''0.52Mg0.56Fe'''0.08Ti0.01Al0.15Si1.89O6	49.1394	0.316805	3.37468	2.60292	0	16.1681	0	9.82631	18.105	0.466696	0	0
2000	956	0.006589	0.013908	-77.5613	0.001941	0.007343	cpx	Na0.03Ca0.75Fe''0.52Mg0.56Fe'''0.08Ti0.01Al0.15Si1.89O6	49.1333	0.312156	3.36429	2.60749	0	16.228	0	9.78628	18.1005	0.467949	0	0
2000	955	0.00654	0.013797	-76.9504	0.001926	0.007286	cpx	Na0.04Ca0.75Fe''0.53Mg0.56Fe'''0.08Ti0.01Al0.15Si1.89O6	49.1271	0.307536	3.35394	2.61208	0	16.288	0	9.7461	18.096	0.469207	0	0
2000	954	0.006493	0.013691	-76.3601	0.001912	0.007231	cpx	Na0.04Ca0.75Fe''0.53Mg0.56Fe'''0.08Ti0.01Al0.15Si1.89O6	49.1208	0.302947	3.3436	2.61672	0	16.3483	0	9.70577	18.0914	0.470468	0	0
2000	953	0.006448	0.013588	-75.7898	0.001898	0.007178	cpx	Na0.04Ca0.75Fe''0.53Mg0.56Fe'''0.08Ti0.01Al0.15Si1.90O6	49.1144	0.298389	3.33329	2.62138	0	16.4088	0	9.6653	18.0867	0.471733	0	0
2000	952	0.006405	0.013488	-75.2392	0.001885	0.007127	cpx	Na0.04Ca0.75Fe''0.53Mg0.55Fe'''0.08Ti0.01Al0.15Si1.90O6	49.1079	0.293861	3.323	2.62608	0	16.4696	0	9.62469	18.0819	0.473002	0	0
2000	951	0.006363	0.013392	-74.7077	0.001872	0.007078	cpx	Na0.04Ca0.75Fe''0.53Mg0.55Fe'''0.08Ti0.01Al0.15Si1.90O6	49.1012	0.289363	3.31273	2.63082	0	16.5305	0	9.58393	18.0771	0.474274	0	0
2000	950	0.006322	0.0133	-74.1951	0.001859	0.00703	cpx	Na0.04Ca0.75Fe''0.54Mg0.55Fe'''0.08Ti0.01Al0.15Si1.90O6	49.0945	0.284896	3.30248	2.63559	0	16.5917	0	9.54303	18.0722	0.475551	0	0
2000	949	0.006283	0.013211	-73.7008	0.001848	0.006984	cpx	Na0.04Ca0.75Fe''0.54Mg0.55Fe'''0.08Ti0.01Al0.15Si1.90O6	49.0877	0.28046	3.29226	2.64039	0	16.6531	0	9.502	18.0673	0.476831	0	0
2000	948	0.006246	0.013125	-73.2244	0.001836	0.00694	cpx	Na0.04Ca0.75Fe''0.54Mg0.55Fe'''0.08Ti0.01Al0.15Si1.90O6	49.0808	0.276054	3.28205	2.64522	0	16.7147	0	9.46082	18.0623	0.478115	0	0
2000	947	0.00621	0.013042	-72.7657	0.001825	0.006897	cpx	Na0.04Ca0.75Fe''0.54Mg0.54Fe'''0.08Ti0.01Al0.15Si1.90O6	49.0737	0.271679	3.27187	2.65009	0	16.7765	0	9.41951	18.0572	0.479403	0	0
2000	946	0.006176	0.012962	-72.3242	0.001814	0.006857	cpx	Na0.04Ca0.75Fe''0.54Mg0.54Fe'''0.08Ti0.01Al0.15Si1.90O6	49.0666	0.267335	3.2617	2.65498	0	16.8386	0	9.37807	18.0521	0.480695	0	0
2000	945	0.006143	0.012886	-71.8995	0.001804	0.006817	cpx	Na0.04Ca0.75Fe''0.55Mg0.54Fe'''0.08Ti0.01Al0.15Si1.90O6	49.0594	0.263021	3.25156	2.65991	0	16.9008	0	9.33649	18.0469	0.48199	0	0
2000	944	0.006111	0.012812	-71.4914	0.001795	0.00678	cpx	Na0.04Ca0.75Fe''0.55Mg0.54Fe'''0.08Ti0.01Al0.15Si1.90O6	49.052	0.258739	3.24143	2.66487	0	16.9633	0	9.29479	18.0416	0.48329	0	0
2000	943	0.006081	0.012741	-71.0994	0.001785	0.006743	cpx	Na0.04Ca0.75Fe''0.55Mg0.53Fe'''0.08Ti0.01Al0.15Si1.90O6	49.0446	0.254488	3.23132	2.66985	0	17.0259	0	9.25296	18.0362	0.484592	0	0
2000	942	0.006052	0.012673	-70.7233	0.001776	0.006709	cpx	Na0.04Ca0.75Fe''0.55Mg0.53Fe'''0.08Ti0.01Al0.15Si1.90O6	49.0371	0.250268	3.22123	2.67487	0	17.0888	0	9.21101	18.0308	0.485899	0	0
2000	941	0.006025	0.012608	-70.3628	0.001768	0.006675	cpx	Na0.04Ca0.75Fe''0.56Mg0.53Fe'''0.08Ti0.01Al0.15Si1.90O6	49.0295	0.24608	3.21116	2.67991	0	17.1519	0	9.16893	18.0254	0.487209	0	0
2000	940	0.005998	0.012546	-70.0174	0.001759	0.006644	cpx	Na0.04Ca0.75Fe''0.56Mg0.53Fe'''0.08Ti0.01Al0.15Si1.90O6	49.0218	0.241922	3.2011	2.68498	0	17.2152	0	9.12673	18.0198	0.488523	0	0
2000	939	0.005973	0.012486	-69.687	0.001752	0.006613	cpx	Na0.04Ca0.75Fe''0.56Mg0.52Fe'''0.08Ti0.01Al0.15Si1.90O6	49.014	0.237797	3.19106	2.69007	0	17.2786	0	9.08442	18.0142	0.48984	0	0
2000	938	0.00595	0.01243	-69.3712	0.001744	0.006584	cpx	Na0.04Ca0.75Fe''0.56Mg0.52Fe'''0.08Ti0.01Al0.15Si1.90O6	49.0061	0.233703	3.18103	2.69519	0	17.3423	0	9.04199	18.0086	0.491161	0	0
2000	937	0.005927	0.012375	-69.0698	0.001737	0.006557	cpx	Na0.04Ca0.75Fe''0.56Mg0.52Fe'''0.08Ti0.01Al0.14Si1.90O6	48.9981	0.22964	3.17102	2.70034	0	17.4061	0	8.99945	18.0028	0.492485	0	0
2000	936	0.005906	0.012323	-68.7824	0.00173	0.00653	cpx	Na0.04Ca0.75Fe''0.57Mg0.52Fe'''0.08Ti0.01Al0.14Si1.90O6	48.9901	0.22561	3.16103	2.7055	0	17.4701	0	8.95681	17.997	0.493813	0	0
2000	935	0.005885	0.012274	-68.5089	0.001724	0.006505	cpx	Na0.04Ca0.75Fe''0.57Mg0.52Fe'''0.08Ti0.01Al0.14Si1.90O6	48.9819	0.221612	3.15104	2.71069	0	17.5343	0	8.91406	17.9912	0.495144	0	0
2000	934	0.005866	0.012227	-68.2489	0.001718	0.006482	cpx	Na0.04Ca0.75Fe''0.57Mg0.51Fe'''0.08Ti0.01Al0.14Si1.90O6	48.9737	0.217646	3.14108	2.7159	0	17.5987	0	8.87121	17.9853	0.496478	0	0
2000	933	0.005848	0.012183	-68.0022	0.001712	0.006459	cpx	Na0.04Ca0.75Fe''0.57Mg0.51Fe'''0.08Ti0.01Al0.14Si1.90O6	48.9654	0.213712	3.13112	2.72113	0	17.6633	0	8.82826	17.9793	0.497816	0	0
2000	932	0.005832	0.012141	-67.7685	0.001707	0.006438	cpx	Na0.04Ca0.75Fe''0.58Mg0.51Fe'''0.08Ti0.01Al0.14Si1.90O6	48.957	0.209811	3.12118	2.72638	0	17.728	0	8.78522	17.9733	0.499158	0	0
2000	931	0.005816	0.012101	-67.5477	0.001702	0.006418	cpx	Na0.04Ca0.75Fe''0.58Mg0.51Fe'''0.08Ti0.01Al0.14Si1.90O6	48.9486	0.205943	3.11125	2.73165	0	17.7929	0	8.74208	17.9672	0.500502	0	0
2000	930	0.005801	0.012063	-67.3394	0.001697	0.006399	cpx	Na0.04Ca0.75Fe''0.58Mg0.50Fe'''0.08Ti0.01Al0.14Si1.90O6	48.94	0.202107	3.10133	2.73693	0	17.8579	0	8.69886	17.961	0.50185	0	0
2000	929	0.005788	0.012028	-67.1435	0.001693	0.006382	cpx	Na0.04Ca0.75Fe''0.58Mg0.50Fe'''0.08Ti0.01Al0.14Si1.90O6	48.9314	0.198304	3.09142	2.74223	0	17.9231	0	8.65556	17.9548	0.503201	0	0
2000	928	0.005775	0.011995	-66.9597	0.001688	0.006365	cpx	Na0.04Ca0.75Fe''0.59Mg0.50Fe'''0.08Ti0.01Al0.14Si1.90O6	48.9227	0.194535	3.08153	2.74754	0	17.9884	0	8.61218	17.9485	0.504555	0	0
2000	927	0.005764	0.011964	-66.7878	0.001685	0.00635	cpx	Na0.04Ca0.75Fe''0.59Mg0.50Fe'''0.08Ti0.01Al0.14Si1.90O6	48.914	0.190799	3.07164	2.75286	0	18.0539	0	8.56873	17.9422	0.505912	0	0
2000	926	0.005753	0.011935	-66.6276	0.001681	0.006336	cpx	Na0.04Ca0.75Fe''0.59Mg0.49Fe'''0.08Ti0.01Al0.14Si1.90O6	48.9052	0.187097	3.06176	2.7582	0	18.1195	0	8.5252	17.9358	0.507272	0	0
2000	925	0.005744	0.011908	-66.4789	0.001678	0.006323	cpx	Na0.04Ca0.75Fe''0.59Mg0.49Fe'''0.08Ti0.01Al0.14Si1.90O6	48.8963	0.183428	3.0519	2.76354	0	18.1852	0	8.48161	17.9294	0.508635	0	0
2000	924	0.005735	0.011883	-66.3414	0.001675	0.006311	cpx	Na0.04Ca0.75Fe''0.59Mg0.49Fe'''0.08Ti0.01Al0.14Si1.90O6	48.8874	0.179794	3.04204	2.76889	0	18.251	0	8.43796	17.9229	0.510001	0	0
2000	923	0.005728	0.01186	-66.215	0.001672	0.0063	cpx	Na0.04Ca0.75Fe''0.60Mg0.49Fe'''0.08Ti0.01Al0.14Si1.90O6	48.8784	0.176193	3.03219	2.77425	0	18.317	0	8.39426	17.9163	0.511369	0	0
2000	922	0.005721	0.011839	-66.0994	0.00167	0.00629	cpx	Na0.04Ca0.75Fe''0.60Mg0.49Fe'''0.08Ti0.01Al0.14Si1.90O6	48.8694	0.172627	3.02235	2.77961	0	18.3831	0	8.3505	17.9097	0.512741	0	0
2000	921	0.005715	0.01182	-65.9946	0.001667	0.006281	cpx	Na0.04Ca0.75Fe''0.60Mg0.48Fe'''0.08Ti0.00Al0.14Si1.90O6	48.8603	0.169096	3.01251	2.78497	0	18.4492	0	8.3067	17.9031	0.514116	0	0
2000	920	0.00571	0.011803	-65.9001	0.001666	0.006273	cpx	Na0.04Ca0.75Fe''0.60Mg0.48Fe'''0.08Ti0.00Al0.14Si1.90O6	48.8511	0.1656	3.00269	2.79034	0	18.5155	0	8.26286	17.8964	0.515493	0	0
2000	919	0.005706	0.011788	-65.816	0.001664	0.006266	cpx	Na0.04Ca0.75Fe''0.61Mg0.48Fe'''0.08Ti0.00Al0.14Si1.90O6	48.8419	0.162138	2.99287	2.79571	0	18.5818	0	8.21898	17.8897	0.516872	0	0
2000	918	0.005703	0.011775	-65.7419	0.001663	0.00626	cpx	Na0.04Ca0.75Fe''0.61Mg0.48Fe'''0.08Ti0.00Al0.14Si1.91O6	48.8327	0.158712	2.98305	2.80107	0	18.6482	0	8.17507	17.8829	0.518255	0	0
2000	917	0.005701	0.011763	-65.6778	0.001661	0.006255	cpx	Na0.04Ca0.75Fe''0.61Mg0.47Fe'''0.08Ti0.00Al0.14Si1.91O6	48.8234	0.155321	2.97325	2.80643	0	18.7147	0	8.13114	17.8761	0.51964	0	0
2000	916	0.0057	0.011753	-65.6233	0.001661	0.006251	cpx	Na0.04Ca0.75Fe''0.61Mg0.47Fe'''0.08Ti0.00Al0.14Si1.91O6	48.8141	0.151966	2.96344	2.81178	0	18.7813	0	8.08719	17.8692	0.521027	0	0
2000	915	0.005699	0.011745	-65.5783	0.00166	0.006248	cpx	Na0.04Ca0.75Fe''0.62Mg0.47Fe'''0.08Ti0.00Al0.14Si1.91O6	48.8048	0.148648	2.95365	2.81712	0	18.8479	0	8.04323	17.8623	0.522417	0	0
clinopyroxene_1	thermodynamic	data	and	composition:
Pressure	Temperature	mass	S	H	V	Cp	structure	formula	SiO2	TiO2	Al2O3	Fe2O3	Cr2O3	FeO	MnO	MgO	CaO	Na2O	K2O	H2O
2000	1160	0.223688	0.533519	-2786.34	0.068936	0.274751	cpx	Na0.01Ca0.27Fe''0.35Mg1.29Fe'''0.02Ti0.00Al0.13Si1.93O6	53.3228	0.0298008	3.08511	0.846255	0	11.6188	0	23.9669	7.03777	0.0926396	0	0
2000	1159	0.234079	0.558039	-2914.35	0.072118	0.287408	cpx	Na0.01Ca0.27Fe''0.35Mg1.29Fe'''0.02Ti0.00Al0.13Si1.93O6	53.3058	0.030188	3.08288	0.849521	0	11.6818	0	23.9204	7.03631	0.0930018	0	0
2000	1158	0.229383	0.546585	-2854.48	0.070651	0.281538	cpx	Na0.01Ca0.27Fe''0.35Mg1.29Fe'''0.02Ti0.00Al0.13Si1.93O6	53.2889	0.0305761	3.08065	0.852782	0	11.745	0	23.8741	7.03466	0.0933618	0	0
2000	1157	0.224827	0.535476	-2796.41	0.069227	0.275844	cpx	Na0.01Ca0.27Fe''0.36Mg1.28Fe'''0.02Ti0.00Al0.13Si1.93O6	53.2719	0.0309653	3.07842	0.85604	0	11.8083	0	23.8278	7.03282	0.0937197	0	0
2000	1156	0.220406	0.524698	-2740.07	0.067846	0.27032	cpx	Na0.01Ca0.27Fe''0.36Mg1.28Fe'''0.02Ti0.00Al0.13Si1.93O6	53.255	0.0313554	3.07619	0.859294	0	11.8717	0	23.7816	7.03081	0.0940755	0	0
2000	1155	0.216115	0.514237	-2685.39	0.066506	0.264958	cpx	Na0.01Ca0.27Fe''0.36Mg1.28Fe'''0.02Ti0.00Al0.13Si1.93O6	53.2381	0.0317464	3.07396	0.862545	0	11.9352	0	23.7355	7.02861	0.0944293	0	0
2000	1154	0.211947	0.504082	-2632.3	0.065205	0.259753	cpx	Na0.01Ca0.27Fe''0.36Mg1.28Fe'''0.02Ti0.00Al0.13Si1.93O6	53.2211	0.0321383	3.07172	0.865793	0	11.9989	0	23.6893	7.02623	0.0947809	0	0
2000	1153	0.207899	0.49422	-2580.74	0.063941	0.254697	cpx	Na0.01Ca0.27Fe''0.37Mg1.28Fe'''0.02Ti0.00Al0.13Si1.93O6	53.2041	0.0325312	3.06948	0.869039	0	12.0627	0	23.6433	7.02368	0.0951305	0	0
2000	1152	0.203966	0.484639	-2530.66	0.062713	0.249786	cpx	Na0.01Ca0.27Fe''0.37Mg1.27Fe'''0.02Ti0.00Al0.13Si1.93O6	53.1872	0.0329249	3.06725	0.872282	0	12.1267	0	23.5973	7.02094	0.095478	0	0
2000	1151	0.200143	0.47533	-2481.98	0.061519	0.245014	cpx	Na0.01Ca0.27Fe''0.37Mg1.27Fe'''0.02Ti0.00Al0.13Si1.93O6	53.1702	0.0333195	3.06501	0.875522	0	12.1908	0	23.5513	7.01804	0.0958234	0	0
2000	1150	0.196426	0.466281	-2434.67	0.060359	0.240375	cpx	Na0.01Ca0.27Fe''0.37Mg1.27Fe'''0.02Ti0.00Al0.13Si1.93O6	53.1532	0.0337149	3.06276	0.878761	0	12.2551	0	23.5054	7.01495	0.0961668	0	0
2000	1149	0.192812	0.457484	-2388.67	0.059231	0.235864	cpx	Na0.01Ca0.27Fe''0.37Mg1.27Fe'''0.02Ti0.00Al0.13Si1.93O6	53.1362	0.0341112	3.06052	0.881999	0	12.3195	0	23.4595	7.0117	0.0965081	0	0
2000	1148	0.189296	0.448927	-2343.93	0.058134	0.231477	cpx	Na0.01Ca0.27Fe''0.38Mg1.26Fe'''0.02Ti0.00Al0.13Si1.93O6	53.1192	0.0345083	3.05827	0.885235	0	12.3841	0	23.4136	7.00827	0.0968474	0	0
2000	1147	0.185874	0.440604	-2300.41	0.057066	0.227209	cpx	Na0.01Ca0.27Fe''0.38Mg1.26Fe'''0.02Ti0.00Al0.13Si1.93O6	53.1021	0.0349062	3.05603	0.88847	0	12.4489	0	23.3677	7.00467	0.0971847	0	0
2000	1146	0.182545	0.432504	-2258.05	0.056028	0.223055	cpx	Na0.01Ca0.27Fe''0.38Mg1.26Fe'''0.02Ti0.00Al0.13Si1.93O6	53.0851	0.0353049	3.05378	0.891704	0	12.5138	0	23.3219	7.0009	0.09752	0	0
2000	1145	0.179303	0.42462	-2216.82	0.055016	0.219013	cpx	Na0.01Ca0.27Fe''0.38Mg1.26Fe'''0.02Ti0.00Al0.13Si1.93O6	53.068	0.0357043	3.05153	0.894938	0	12.5789	0	23.2761	6.99696	0.0978532	0	0
2000	1144	0.176146	0.416944	-2176.68	0.054032	0.215076	cpx	Na0.01Ca0.27Fe''0.38Mg1.26Fe'''0.02Ti0.00Al0.13Si1.93O6	53.0509	0.0361045	3.04928	0.898171	0	12.6442	0	23.2303	6.99286	0.0981844	0	0
2000	1143	0.173071	0.40947	-2137.58	0.053073	0.211243	cpx	Na0.01Ca0.27Fe''0.39Mg1.25Fe'''0.02Ti0.00Al0.13Si1.92O6	53.0338	0.0365054	3.04702	0.901405	0	12.7096	0	23.1846	6.98859	0.0985136	0	0
2000	1142	0.170074	0.402189	-2099.5	0.052138	0.207508	cpx	Na0.01Ca0.27Fe''0.39Mg1.25Fe'''0.02Ti0.00Al0.13Si1.92O6	53.0167	0.036907	3.04477	0.904639	0	12.7752	0	23.1388	6.98415	0.0988408	0	0
2000	1141	0.167155	0.395095	-2062.39	0.051228	0.20387	cpx	Na0.01Ca0.27Fe''0.39Mg1.25Fe'''0.02Ti0.00Al0.13Si1.92O6	52.9995	0.0373093	3.04251	0.907873	0	12.841	0	23.093	6.97955	0.099166	0	0
2000	1140	0.164308	0.388181	-2026.23	0.050341	0.200323	cpx	Na0.01Ca0.27Fe''0.39Mg1.25Fe'''0.02Ti0.00Al0.13Si1.92O6	52.9823	0.0377123	3.04025	0.911109	0	12.907	0	23.0473	6.97479	0.0994892	0	0
2000	1139	0.161533	0.381442	-1990.97	0.049476	0.196866	cpx	Na0.01Ca0.27Fe''0.39Mg1.25Fe'''0.03Ti0.00Al0.13Si1.92O6	52.9651	0.0381159	3.03799	0.914345	0	12.9732	0	23.0015	6.96987	0.0998104	0	0
2000	1138	0.158827	0.374871	-1956.6	0.048632	0.193495	cpx	Na0.01Ca0.27Fe''0.40Mg1.24Fe'''0.03Ti0.00Al0.13Si1.92O6	52.9479	0.0385202	3.03573	0.917583	0	13.0396	0	22.9557	6.96479	0.10013	0	0
2000	1137	0.156187	0.368463	-1923.07	0.04781	0.190208	cpx	Na0.01Ca0.27Fe''0.40Mg1.24Fe'''0.03Ti0.00Al0.13Si1.92O6	52.9307	0.0389251	3.03347	0.920823	0	13.1062	0	22.91	6.95955	0.100447	0	0
2000	1136	0.153611	0.362212	-1890.37	0.047007	0.187001	cpx	Na0.01Ca0.27Fe''0.40Mg1.24Fe'''0.03Ti0.00Al0.13Si1.92O6	52.9134	0.0393307	3.0312	0.924064	0	13.1729	0	22.8642	6.95415	0.100762	0	0
2000	1135	0.151098	0.356113	-1858.46	0.046224	0.183872	cpx	Na0.01Ca0.27Fe''0.40Mg1.24Fe'''0.03Ti0.00Al0.13Si1.92O6	52.8961	0.0397368	3.02894	0.927308	0	13.2399	0	22.8184	6.9486	0.101075	0	0
2000	1134	0.148644	0.350162	-1827.31	0.04546	0.180818	cpx	Na0.01Ca0.27Fe''0.41Mg1.24Fe'''0.03Ti0.00Al0.13Si1.92O6	52.8787	0.0401435	3.02667	0.930554	0	13.3071	0	22.7726	6.94289	0.101387	0	0
2000	1133	0.146249	0.344352	-1796.91	0.044713	0.177837	cpx	Na0.01Ca0.27Fe''0.41Mg1.23Fe'''0.03Ti0.00Al0.13Si1.92O6	52.8613	0.0405508	3.0244	0.933803	0	13.3745	0	22.7267	6.93703	0.101696	0	0
2000	1132	0.14391	0.338681	-1767.23	0.043985	0.174926	cpx	Na0.01Ca0.27Fe''0.41Mg1.23Fe'''0.03Ti0.00Al0.13Si1.92O6	52.8439	0.0409586	3.02214	0.937055	0	13.442	0	22.6809	6.93101	0.102003	0	0
2000	1131	0.141625	0.333143	-1738.25	0.043273	0.172084	cpx	Na0.01Ca0.27Fe''0.41Mg1.23Fe'''0.03Ti0.00Al0.13Si1.92O6	52.8265	0.0413669	3.01986	0.94031	0	13.5099	0	22.635	6.92485	0.102308	0	0
2000	1130	0.139393	0.327734	-1709.94	0.042579	0.169308	cpx	Na0.01Ca0.27Fe''0.41Mg1.23Fe'''0.03Ti0.00Al0.13Si1.92O6	52.809	0.0417758	3.01759	0.943569	0	13.5779	0	22.589	6.91853	0.102612	0	0
2000	1129	0.137212	0.32245	-1682.28	0.0419	0.166596	cpx	Na0.01Ca0.27Fe''0.42Mg1.23Fe'''0.03Ti0.00Al0.13Si1.92O6	52.7915	0.0421852	3.01532	0.946832	0	13.6461	0	22.5431	6.91206	0.102913	0	0
2000	1128	0.135081	0.317288	-1655.26	0.041236	0.163946	cpx	Na0.01Ca0.27Fe''0.42Mg1.22Fe'''0.03Ti0.00Al0.13Si1.92O6	52.7739	0.042595	3.01305	0.950099	0	13.7146	0	22.4971	6.90545	0.103213	0	0
2000	1127	0.132998	0.312243	-1628.85	0.040588	0.161356	cpx	Na0.01Ca0.27Fe''0.42Mg1.22Fe'''0.03Ti0.00Al0.13Si1.92O6	52.7563	0.0430054	3.01077	0.95337	0	13.7833	0	22.451	6.89868	0.10351	0	0
2000	1126	0.130961	0.307312	-1603.03	0.039954	0.158824	cpx	Na0.01Ca0.27Fe''0.42Mg1.22Fe'''0.03Ti0.00Al0.13Si1.92O6	52.7387	0.0434162	3.0085	0.956645	0	13.8522	0	22.4049	6.89178	0.103805	0	0
2000	1125	0.12897	0.302491	-1577.79	0.039334	0.156349	cpx	Na0.01Ca0.27Fe''0.43Mg1.22Fe'''0.03Ti0.00Al0.13Si1.92O6	52.721	0.0438274	3.00622	0.959926	0	13.9214	0	22.3588	6.88472	0.104099	0	0
2000	1124	0.127022	0.297778	-1553.11	0.038728	0.153929	cpx	Na0.01Ca0.27Fe''0.43Mg1.21Fe'''0.03Ti0.00Al0.13Si1.92O6	52.7033	0.044239	3.00395	0.963212	0	13.9908	0	22.3126	6.87753	0.10439	0	0
2000	1123	0.125117	0.293169	-1528.97	0.038135	0.151562	cpx	Na0.01Ca0.27Fe''0.43Mg1.21Fe'''0.03Ti0.00Al0.13Si1.92O6	52.6856	0.0446511	3.00167	0.966503	0	14.0604	0	22.2664	6.87019	0.10468	0	0
2000	1122	0.123253	0.28866	-1505.36	0.037556	0.149247	cpx	Na0.01Ca0.27Fe''0.43Mg1.21Fe'''0.03Ti0.00Al0.13Si1.92O6	52.6678	0.0450635	2.99939	0.9698	0	14.1303	0	22.22	6.86271	0.104967	0	0
2000	1121	0.12143	0.284249	-1482.26	0.036988	0.146982	cpx	Na0.01Ca0.27Fe''0.43Mg1.21Fe'''0.03Ti0.00Al0.13Si1.92O6	52.6499	0.0454764	2.99711	0.973103	0	14.2004	0	22.1737	6.85509	0.105253	0	0
2000	1120	0.119645	0.279934	-1459.66	0.036433	0.144766	cpx	Na0.01Ca0.27Fe''0.44Mg1.21Fe'''0.03Ti0.00Al0.13Si1.92O6	52.632	0.0458896	2.99483	0.976413	0	14.2707	0	22.1273	6.84733	0.105536	0	0
2000	1119	0.117898	0.275711	-1437.53	0.03589	0.142596	cpx	Na0.01Ca0.27Fe''0.44Mg1.20Fe'''0.03Ti0.00Al0.13Si1.92O6	52.6141	0.0463031	2.99255	0.979729	0	14.3414	0	22.0808	6.83943	0.105818	0	0
2000	1118	0.116187	0.271577	-1415.88	0.035358	0.140473	cpx	Na0.01Ca0.27Fe''0.44Mg1.20Fe'''0.03Ti0.00Al0.13Si1.92O6	52.5961	0.046717	2.99028	0.983052	0	14.4122	0	22.0342	6.83139	0.106098	0	0
2000	1117	0.114513	0.267531	-1394.68	0.034838	0.138394	cpx	Na0.01Ca0.27Fe''0.44Mg1.20Fe'''0.03Ti0.00Al0.13Si1.92O6	52.578	0.0471312	2.98799	0.986382	0	14.4833	0	21.9875	6.82322	0.106375	0	0
2000	1116	0.112873	0.26357	-1373.93	0.034328	0.136359	cpx	Na0.01Ca0.27Fe''0.45Mg1.20Fe'''0.03Ti0.00Al0.13Si1.92O6	52.5599	0.0475458	2.98571	0.989719	0	14.5547	0	21.9408	6.81492	0.106651	0	0
2000	1115	0.111266	0.25969	-1353.6	0.033828	0.134366	cpx	Na0.01Ca0.27Fe''0.45Mg1.20Fe'''0.03Ti0.00Al0.13Si1.92O6	52.5418	0.0479606	2.98343	0.993065	0	14.6264	0	21.894	6.80648	0.106924	0	0
2000	1114	0.109693	0.255891	-1333.69	0.033339	0.132414	cpx	Na0.01Ca0.27Fe''0.45Mg1.19Fe'''0.03Ti0.00Al0.13Si1.92O6	52.5235	0.0483757	2.98115	0.996418	0	14.6983	0	21.8471	6.79791	0.107196	0	0
2000	1113	0.108151	0.25217	-1314.19	0.03286	0.130502	cpx	Na0.01Ca0.27Fe''0.45Mg1.19Fe'''0.03Ti0.00Al0.13Si1.92O6	52.5053	0.0487911	2.97887	0.99978	0	14.7705	0	21.8001	6.7892	0.107466	0	0
2000	1112	0.106641	0.248525	-1295.08	0.032391	0.128628	cpx	Na0.01Ca0.27Fe''0.46Mg1.19Fe'''0.03Ti0.00Al0.13Si1.92O6	52.487	0.0492067	2.97659	1.00315	0	14.8429	0	21.7531	6.78037	0.107733	0	0
2000	1111	0.10516	0.244953	-1276.36	0.031931	0.126793	cpx	Na0.01Ca0.27Fe''0.46Mg1.19Fe'''0.03Ti0.00Al0.13Si1.92O6	52.4686	0.0496225	2.97431	1.00653	0	14.9156	0	21.7059	6.7714	0.107999	0	0
2000	1110	0.103709	0.241453	-1258.01	0.03148	0.124994	cpx	Na0.01Ca0.27Fe''0.46Mg1.18Fe'''0.03Ti0.00Al0.13Si1.92O6	52.4502	0.0500386	2.97203	1.00992	0	14.9886	0	21.6587	6.76231	0.108262	0	0
2000	1109	0.102287	0.238023	-1240.03	0.031038	0.12323	cpx	Na0.01Ca0.27Fe''0.46Mg1.18Fe'''0.03Ti0.00Al0.13Si1.92O6	52.4317	0.050455	2.96975	1.01332	0	15.0619	0	21.6113	6.75309	0.108524	0	0
2000	1108	0.100893	0.234661	-1222.4	0.030605	0.121502	cpx	Na0.01Ca0.27Fe''0.46Mg1.18Fe'''0.03Ti0.00Al0.13Si1.92O6	52.4131	0.0508715	2.96747	1.01672	0	15.1355	0	21.5638	6.74374	0.108784	0	0
2000	1107	0.099525	0.231365	-1205.12	0.030181	0.119807	cpx	Na0.01Ca0.26Fe''0.47Mg1.18Fe'''0.03Ti0.00Al0.13Si1.92O6	52.3945	0.0512882	2.96519	1.02014	0	15.2093	0	21.5163	6.73427	0.109041	0	0
2000	1106	0.098184	0.228133	-1188.17	0.029764	0.118146	cpx	Na0.01Ca0.26Fe''0.47Mg1.18Fe'''0.03Ti0.00Al0.13Si1.92O6	52.3758	0.0517051	2.96291	1.02357	0	15.2834	0	21.4686	6.72467	0.109297	0	0
2000	1105	0.096869	0.224964	-1171.55	0.029356	0.116517	cpx	Na0.01Ca0.26Fe''0.47Mg1.17Fe'''0.03Ti0.00Al0.13Si1.92O6	52.3571	0.0521221	2.96064	1.02701	0	15.3579	0	21.4208	6.71495	0.109551	0	0
2000	1104	0.095579	0.221857	-1155.25	0.028955	0.114919	cpx	Na0.01Ca0.26Fe''0.47Mg1.17Fe'''0.03Ti0.00Al0.13Si1.92O6	52.3382	0.0525393	2.95836	1.03046	0	15.4326	0	21.3729	6.70511	0.109802	0	0
2000	1103	0.094313	0.218809	-1139.26	0.028562	0.113351	cpx	Na0.01Ca0.26Fe''0.48Mg1.17Fe'''0.03Ti0.00Al0.13Si1.92O6	52.3194	0.0529566	2.95608	1.03392	0	15.5076	0	21.3249	6.69514	0.110052	0	0
2000	1102	0.093072	0.215819	-1123.58	0.028177	0.111813	cpx	Na0.01Ca0.26Fe''0.48Mg1.17Fe'''0.03Ti0.00Al0.13Si1.92O6	52.3004	0.0533741	2.9538	1.03739	0	15.5829	0	21.2767	6.68506	0.110299	0	0
2000	1101	0.091853	0.212886	-1108.19	0.027799	0.110305	cpx	Na0.01Ca0.26Fe''0.48Mg1.16Fe'''0.03Ti0.00Al0.13Si1.92O6	52.2814	0.0537917	2.95153	1.04088	0	15.6585	0	21.2285	6.67486	0.110545	0	0
2000	1100	0.090657	0.210008	-1093.09	0.027428	0.108824	cpx	Na0.01Ca0.26Fe''0.48Mg1.16Fe'''0.03Ti0.00Al0.13Si1.92O6	52.2623	0.0542094	2.94925	1.04438	0	15.7345	0	21.1801	6.66453	0.110788	0	0
2000	1099	0.089484	0.207185	-1078.27	0.027064	0.107371	cpx	Na0.01Ca0.26Fe''0.49Mg1.16Fe'''0.03Ti0.00Al0.13Si1.92O6	52.2432	0.0546272	2.94698	1.04789	0	15.8107	0	21.1315	6.65409	0.111029	0	0
2000	1098	0.088332	0.204413	-1063.73	0.026706	0.105945	cpx	Na0.01Ca0.26Fe''0.49Mg1.16Fe'''0.03Ti0.00Al0.13Si1.92O6	52.2239	0.055045	2.9447	1.05141	0	15.8872	0	21.0829	6.64354	0.111269	0	0
2000	1097	0.087201	0.201693	-1049.45	0.026355	0.104546	cpx	Na0.01Ca0.26Fe''0.49Mg1.16Fe'''0.03Ti0.00Al0.13Si1.92O6	52.2046	0.0554629	2.94243	1.05494	0	15.9641	0	21.0341	6.63286	0.111506	0	0
2000	1096	0.08609	0.199023	-1035.43	0.026011	0.103172	cpx	Na0.01Ca0.26Fe''0.49Mg1.15Fe'''0.03Ti0.00Al0.13Si1.92O6	52.1852	0.0558809	2.94016	1.05849	0	16.0413	0	20.9851	6.62208	0.111741	0	0
2000	1095	0.085	0.196402	-1021.67	0.025673	0.101823	cpx	Na0.01Ca0.26Fe''0.50Mg1.15Fe'''0.03Ti0.00Al0.13Si1.92O6	52.1658	0.0562989	2.93789	1.06206	0	16.1188	0	20.936	6.61118	0.111974	0	0
2000	1094	0.083929	0.193829	-1008.16	0.025341	0.100498	cpx	Na0.01Ca0.26Fe''0.50Mg1.15Fe'''0.03Ti0.00Al0.13Si1.92O6	52.1462	0.056717	2.93562	1.06564	0	16.1966	0	20.8868	6.60016	0.112206	0	0
2000	1093	0.082877	0.191302	-994.894	0.025014	0.099198	cpx	Na0.01Ca0.26Fe''0.50Mg1.15Fe'''0.03Ti0.00Al0.13Si1.92O6	52.1266	0.0571351	2.93335	1.06923	0	16.2748	0	20.8374	6.58904	0.112435	0	0
2000	1092	0.081844	0.188821	-981.863	0.024694	0.09792	cpx	Na0.01Ca0.26Fe''0.50Mg1.14Fe'''0.03Ti0.00Al0.13Si1.92O6	52.1069	0.0575532	2.93109	1.07284	0	16.3533	0	20.7878	6.57781	0.112662	0	0
2000	1091	0.08083	0.186384	-969.064	0.024379	0.096666	cpx	Na0.01Ca0.26Fe''0.51Mg1.14Fe'''0.03Ti0.00Al0.13Si1.92O6	52.0872	0.0579713	2.92882	1.07646	0	16.4321	0	20.7381	6.56646	0.112887	0	0
2000	1090	0.079833	0.183991	-956.491	0.02407	0.095433	cpx	Na0.01Ca0.26Fe''0.51Mg1.14Fe'''0.03Ti0.00Al0.13Si1.92O6	52.0673	0.0583894	2.92656	1.0801	0	16.5112	0	20.6883	6.55501	0.113109	0	0
2000	1089	0.078853	0.181639	-944.139	0.023767	0.094223	cpx	Na0.01Ca0.26Fe''0.51Mg1.14Fe'''0.03Ti0.00Al0.13Si1.92O6	52.0474	0.0588075	2.9243	1.08375	0	16.5907	0	20.6383	6.54345	0.11333	0	0
2000	1088	0.077891	0.17933	-932.004	0.023469	0.093033	cpx	Na0.01Ca0.26Fe''0.52Mg1.13Fe'''0.03Ti0.00Al0.13Si1.92O6	52.0273	0.0592255	2.92204	1.08743	0	16.6706	0	20.5881	6.53178	0.113549	0	0
2000	1087	0.076945	0.177061	-920.08	0.023175	0.091864	cpx	Na0.01Ca0.26Fe''0.52Mg1.13Fe'''0.03Ti0.00Al0.13Si1.92O6	52.0072	0.0596436	2.91978	1.09111	0	16.7508	0	20.5377	6.52	0.113765	0	0
2000	1086	0.076016	0.174831	-908.362	0.022887	0.090716	cpx	Na0.01Ca0.26Fe''0.52Mg1.13Fe'''0.03Ti0.00Al0.13Si1.92O6	51.987	0.0600615	2.91752	1.09482	0	16.8313	0	20.4872	6.50812	0.11398	0	0
2000	1085	0.075102	0.17264	-896.846	0.022604	0.089587	cpx	Na0.01Ca0.26Fe''0.52Mg1.13Fe'''0.03Ti0.00Al0.13Si1.92O6	51.9667	0.0604794	2.91526	1.09854	0	16.9122	0	20.4364	6.49614	0.114192	0	0
2000	1084	0.074204	0.170487	-885.527	0.022326	0.088478	cpx	Na0.01Ca0.26Fe''0.53Mg1.13Fe'''0.03Ti0.00Al0.13Si1.92O6	51.9464	0.0608973	2.91301	1.10228	0	16.9934	0	20.3856	6.48405	0.114402	0	0
2000	1083	0.073321	0.168371	-874.402	0.022053	0.087387	cpx	Na0.01Ca0.26Fe''0.53Mg1.12Fe'''0.03Ti0.00Al0.13Si1.92O6	51.9259	0.0613151	2.91076	1.10604	0	17.075	0	20.3345	6.47186	0.114611	0	0
2000	1082	0.072453	0.166291	-863.465	0.021784	0.086316	cpx	Na0.01Ca0.26Fe''0.53Mg1.12Fe'''0.03Ti0.00Al0.13Si1.92O6	51.9053	0.0617327	2.90851	1.10982	0	17.157	0	20.2832	6.45957	0.114817	0	0
2000	1081	0.0716	0.164246	-852.713	0.021519	0.085262	cpx	Na0.01Ca0.26Fe''0.53Mg1.12Fe'''0.03Ti0.00Al0.13Si1.92O6	51.8847	0.0621503	2.90626	1.11362	0	17.2393	0	20.2318	6.44718	0.11502	0	0
2000	1080	0.070761	0.162236	-842.142	0.02126	0.084226	cpx	Na0.01Ca0.26Fe''0.54Mg1.12Fe'''0.03Ti0.00Al0.13Si1.92O6	51.8639	0.0625678	2.90401	1.11743	0	17.322	0	20.1801	6.43469	0.115222	0	0
2000	1079	0.069936	0.16026	-831.747	0.021004	0.083207	cpx	Na0.01Ca0.26Fe''0.54Mg1.11Fe'''0.03Ti0.00Al0.13Si1.92O6	51.8431	0.0629852	2.90177	1.12127	0	17.4051	0	20.1283	6.4221	0.115422	0	0
2000	1078	0.069125	0.158317	-821.526	0.020753	0.082206	cpx	Na0.01Ca0.25Fe''0.54Mg1.11Fe'''0.03Ti0.00Al0.13Si1.92O6	51.8222	0.0634025	2.89953	1.12512	0	17.4885	0	20.0763	6.40941	0.115619	0	0
2000	1077	0.068327	0.156406	-811.473	0.020506	0.081221	cpx	Na0.01Ca0.25Fe''0.55Mg1.11Fe'''0.03Ti0.00Al0.13Si1.92O6	51.8011	0.0638196	2.89729	1.129	0	17.5723	0	20.024	6.39663	0.115814	0	0
2000	1076	0.067542	0.154528	-801.587	0.020263	0.080252	cpx	Na0.01Ca0.25Fe''0.55Mg1.11Fe'''0.03Ti0.00Al0.13Si1.92O6	51.78	0.0642366	2.89505	1.1329	0	17.6565	0	19.9716	6.38375	0.116008	0	0
2000	1075	0.066769	0.15268	-791.863	0.020023	0.079299	cpx	Na0.01Ca0.25Fe''0.55Mg1.10Fe'''0.03Ti0.00Al0.13Si1.92O6	51.7588	0.0646535	2.89281	1.13682	0	17.7411	0	19.9189	6.37077	0.116199	0	0
2000	1074	0.06601	0.150863	-782.297	0.019788	0.078362	cpx	Na0.01Ca0.25Fe''0.55Mg1.10Fe'''0.03Ti0.00Al0.13Si1.92O6	51.7374	0.0650702	2.89058	1.14076	0	17.826	0	19.8661	6.3577	0.116387	0	0
2000	1073	0.065263	0.149075	-772.887	0.019557	0.07744	cpx	Na0.01Ca0.25Fe''0.56Mg1.10Fe'''0.03Ti0.00Al0.13Si1.92O6	51.716	0.0654867	2.88835	1.14472	0	17.9114	0	19.813	6.34454	0.116574	0	0
2000	1072	0.064527	0.147317	-763.63	0.019329	0.076533	cpx	Na0.01Ca0.25Fe''0.56Mg1.10Fe'''0.03Ti0.00Al0.13Si1.92O6	51.6944	0.0659031	2.88612	1.14871	0	17.9971	0	19.7597	6.33128	0.116758	0	0
2000	1071	0.063804	0.145587	-754.522	0.019106	0.075641	cpx	Na0.01Ca0.25Fe''0.56Mg1.09Fe'''0.03Ti0.00Al0.13Si1.92O6	51.6728	0.0663193	2.88389	1.15271	0	18.0832	0	19.7062	6.31793	0.116941	0	0
2000	1070	0.063092	0.143886	-745.56	0.018885	0.074763	cpx	Na0.01Ca0.25Fe''0.57Mg1.09Fe'''0.03Ti0.00Al0.13Si1.92O6	51.651	0.0667354	2.88166	1.15675	0	18.1698	0	19.6524	6.3045	0.117121	0	0
2000	1069	0.062392	0.142212	-736.741	0.018668	0.073899	cpx	Na0.01Ca0.25Fe''0.57Mg1.09Fe'''0.03Ti0.00Al0.13Si1.92O6	51.6291	0.0671512	2.87944	1.1608	0	18.2567	0	19.5985	6.29097	0.117298	0	0
2000	1068	0.061702	0.140564	-728.063	0.018455	0.073049	cpx	Na0.01Ca0.25Fe''0.57Mg1.09Fe'''0.03Ti0.00Al0.13Si1.92O6	51.6072	0.0675669	2.87722	1.16488	0	18.3441	0	19.5443	6.27735	0.117474	0	0
2000	1067	0.061024	0.138943	-719.522	0.018245	0.072212	cpx	Na0.01Ca0.25Fe''0.57Mg1.08Fe'''0.03Ti0.00Al0.13Si1.92O6	51.5851	0.0679824	2.875	1.16899	0	18.4318	0	19.4898	6.26365	0.117647	0	0
2000	1066	0.060356	0.137348	-711.116	0.018039	0.071389	cpx	Na0.01Ca0.25Fe''0.58Mg1.08Fe'''0.03Ti0.00Al0.13Si1.92O6	51.5629	0.0683976	2.87279	1.17312	0	18.52	0	19.4352	6.24985	0.117819	0	0
2000	1065	0.059698	0.135779	-702.843	0.017835	0.070578	cpx	Na0.01Ca0.25Fe''0.58Mg1.08Fe'''0.03Ti0.00Al0.13Si1.92O6	51.5406	0.0688127	2.87057	1.17728	0	18.6086	0	19.3803	6.23597	0.117988	0	0
2000	1064	0.059051	0.134234	-694.699	0.017635	0.069781	cpx	Na0.01Ca0.25Fe''0.58Mg1.08Fe'''0.03Ti0.00Al0.13Si1.92O6	51.5181	0.0692275	2.86836	1.18146	0	18.6975	0	19.3251	6.22201	0.118154	0	0
2000	1063	0.058414	0.132713	-686.682	0.017438	0.068995	cpx	Na0.01Ca0.25Fe''0.59Mg1.07Fe'''0.03Ti0.00Al0.13Si1.92O6	51.4956	0.0696422	2.86615	1.18567	0	18.787	0	19.2697	6.20796	0.118319	0	0
2000	1062	0.057787	0.131216	-678.789	0.017244	0.068222	cpx	Na0.01Ca0.25Fe''0.59Mg1.07Fe'''0.03Ti0.00Al0.13Si1.92O6	51.4729	0.0700566	2.86395	1.18991	0	18.8768	0	19.214	6.19383	0.118481	0	0
2000	1061	0.05717	0.129743	-671.019	0.017053	0.067461	cpx	Na0.01Ca0.25Fe''0.59Mg1.07Fe'''0.03Ti0.00Al0.13Si1.92O6	51.4502	0.0704707	2.86174	1.19417	0	18.9671	0	19.1581	6.17961	0.118641	0	0
2000	1060	0.056562	0.128293	-663.369	0.016865	0.066712	cpx	Na0.01Ca0.25Fe''0.60Mg1.06Fe'''0.03Ti0.00Al0.13Si1.92O6	51.4273	0.0708847	2.85954	1.19846	0	19.0578	0	19.102	6.16531	0.118798	0	0
2000	1059	0.055963	0.126865	-655.836	0.01668	0.065975	cpx	Na0.01Ca0.25Fe''0.60Mg1.06Fe'''0.03Ti0.00Al0.13Si1.92O6	51.4042	0.0712984	2.85734	1.20278	0	19.1489	0	19.0455	6.15093	0.118954	0	0
2000	1058	0.055374	0.125459	-648.419	0.016498	0.065248	cpx	Na0.01Ca0.25Fe''0.60Mg1.06Fe'''0.03Ti0.00Al0.13Si1.92O6	51.3811	0.0717118	2.85514	1.20714	0	19.2405	0	18.9889	6.13647	0.119107	0	0
2000	1057	0.054793	0.124075	-641.114	0.016318	0.064533	cpx	Na0.01Ca0.25Fe''0.61Mg1.06Fe'''0.03Ti0.00Al0.13Si1.92O6	51.3578	0.072125	2.85295	1.21152	0	19.3325	0	18.9319	6.12193	0.119258	0	0
2000	1056	0.054222	0.122713	-633.921	0.016141	0.063829	cpx	Na0.01Ca0.25Fe''0.61Mg1.05Fe'''0.03Ti0.00Al0.13Si1.92O6	51.3344	0.072538	2.85076	1.21593	0	19.4249	0	18.8747	6.10732	0.119406	0	0
2000	1055	0.053659	0.121371	-626.837	0.015967	0.063136	cpx	Na0.01Ca0.24Fe''0.61Mg1.05Fe'''0.03Ti0.00Al0.13Si1.92O6	51.3109	0.0729507	2.84857	1.22037	0	19.5178	0	18.8172	6.09262	0.119552	0	0
2000	1054	0.053104	0.12005	-619.859	0.015796	0.062453	cpx	Na0.01Ca0.24Fe''0.61Mg1.05Fe'''0.03Ti0.00Al0.13Si1.92O6	51.2873	0.0733631	2.84638	1.22484	0	19.6112	0	18.7594	6.07785	0.119696	0	0
2000	1053	0.052558	0.118748	-612.987	0.015627	0.06178	cpx	Na0.01Ca0.24Fe''0.62Mg1.05Fe'''0.03Ti0.00Al0.13Si1.92O6	51.2635	0.0737753	2.84419	1.22934	0	19.705	0	18.7013	6.063	0.119838	0	0
2000	1052	0.05202	0.117467	-606.218	0.015461	0.061117	cpx	Na0.01Ca0.24Fe''0.62Mg1.04Fe'''0.03Ti0.00Al0.13Si1.92O6	51.2396	0.0741872	2.84201	1.23388	0	19.7993	0	18.643	6.04808	0.119977	0	0
2000	1051	0.05149	0.116205	-599.549	0.015297	0.060465	cpx	Na0.01Ca0.24Fe''0.62Mg1.04Fe'''0.03Ti0.00Al0.13Si1.92O6	51.2156	0.0745989	2.83983	1.23845	0	19.894	0	18.5844	6.03308	0.120114	0	0
2000	1050	0.050968	0.114962	-592.981	0.015135	0.059822	cpx	Na0.01Ca0.24Fe''0.63Mg1.04Fe'''0.04Ti0.00Al0.13Si1.92O6	51.1914	0.0750103	2.83765	1.24305	0	19.9892	0	18.5254	6.01801	0.120248	0	0
2000	1049	0.050454	0.113737	-586.509	0.014977	0.059189	cpx	Na0.01Ca0.24Fe''0.63Mg1.03Fe'''0.04Ti0.00Al0.13Si1.92O6	51.1671	0.0754214	2.83547	1.24768	0	20.0848	0	18.4662	6.00286	0.12038	0	0
2000	1048	0.049918	0.112465	-579.794	0.014811	0.05853	cpx	Na0.01Ca0.24Fe''0.63Mg1.03Fe'''0.04Ti0.00Al0.13Si1.92O6	51.1428	0.0758283	2.83327	1.25233	0	20.1808	0	18.4068	5.98765	0.120509	0	0
2000	1047	0.049364	0.111155	-572.886	0.014641	0.057852	cpx	Na0.01Ca0.24Fe''0.64Mg1.03Fe'''0.04Ti0.00Al0.13Si1.92O6	51.1184	0.0762274	2.83101	1.25696	0	20.277	0	18.3474	5.97238	0.120635	0	0
2000	1046	0.048864	0.109966	-566.601	0.014486	0.057237	cpx	Na0.01Ca0.24Fe''0.64Mg1.03Fe'''0.04Ti0.00Al0.13Si1.92O6	51.0939	0.0766251	2.82875	1.26162	0	20.3736	0	18.2877	5.95705	0.120758	0	0
2000	1045	0.048374	0.1088	-560.437	0.014335	0.056634	cpx	Na0.01Ca0.24Fe''0.64Mg1.02Fe'''0.04Ti0.00Al0.13Si1.92O6	51.0693	0.0770217	2.82649	1.26631	0	20.4707	0	18.2276	5.94165	0.120879	0	0
2000	1044	0.04789	0.107651	-554.364	0.014186	0.056039	cpx	Na0.01Ca0.24Fe''0.65Mg1.02Fe'''0.04Ti0.00Al0.13Si1.92O6	51.0445	0.0774173	2.82423	1.27104	0	20.5683	0	18.1673	5.92619	0.120997	0	0
2000	1043	0.047414	0.106519	-548.377	0.014039	0.055453	cpx	Na0.01Ca0.24Fe''0.65Mg1.02Fe'''0.04Ti0.00Al0.13Si1.92O6	51.0197	0.0778119	2.82197	1.2758	0	20.6663	0	18.1067	5.91066	0.121113	0	0
2000	1042	0.046944	0.105403	-542.475	0.013893	0.054876	cpx	Na0.01Ca0.24Fe''0.65Mg1.01Fe'''0.04Ti0.00Al0.13Si1.92O6	50.9947	0.0782053	2.8197	1.28059	0	20.7648	0	18.0458	5.89507	0.121226	0	0
2000	1041	0.046481	0.104303	-536.654	0.01375	0.054306	cpx	Na0.01Ca0.24Fe''0.66Mg1.01Fe'''0.04Ti0.00Al0.13Si1.92O6	50.9695	0.0785977	2.81744	1.28542	0	20.8637	0	17.9846	5.87941	0.121337	0	0
2000	1040	0.046024	0.103218	-530.915	0.013609	0.053744	cpx	Na0.01Ca0.24Fe''0.66Mg1.01Fe'''0.04Ti0.00Al0.13Si1.92O6	50.9442	0.0789888	2.81517	1.29029	0	20.9631	0	17.923	5.8637	0.121445	0	0
2000	1039	0.045574	0.102149	-525.255	0.01347	0.05319	cpx	Na0.01Ca0.24Fe''0.66Mg1.00Fe'''0.04Ti0.00Al0.13Si1.92O6	50.9188	0.0793787	2.8129	1.29519	0	21.0631	0	17.8612	5.84792	0.121551	0	0
2000	1038	0.045129	0.101094	-519.674	0.013333	0.052644	cpx	Na0.01Ca0.24Fe''0.67Mg1.00Fe'''0.04Ti0.00Al0.13Si1.92O6	50.8932	0.0797672	2.81063	1.30013	0	21.1634	0	17.7991	5.83209	0.121655	0	0
2000	1037	0.044691	0.100054	-514.168	0.013198	0.052105	cpx	Na0.01Ca0.24Fe''0.67Mg1.00Fe'''0.04Ti0.00Al0.13Si1.92O6	50.8676	0.0801544	2.80835	1.3051	0	21.2643	0	17.7366	5.81619	0.121756	0	0
2000	1036	0.044259	0.099028	-508.737	0.013064	0.051574	cpx	Na0.01Ca0.23Fe''0.68Mg1.00Fe'''0.04Ti0.00Al0.12Si1.92O6	50.8417	0.0805402	2.80607	1.31011	0	21.3657	0	17.6738	5.80024	0.121854	0	0
2000	1035	0.043833	0.098017	-503.38	0.012933	0.05105	cpx	Na0.01Ca0.23Fe''0.68Mg0.99Fe'''0.04Ti0.00Al0.12Si1.92O6	50.8157	0.0809244	2.80379	1.31516	0	21.4675	0	17.6107	5.78424	0.121951	0	0
2000	1034	0.043412	0.097019	-498.095	0.012803	0.050533	cpx	Na0.01Ca0.23Fe''0.68Mg0.99Fe'''0.04Ti0.00Al0.12Si1.92O6	50.7896	0.081307	2.8015	1.32024	0	21.5698	0	17.5473	5.76818	0.122044	0	0
2000	1033	0.042997	0.096034	-492.88	0.012675	0.050023	cpx	Na0.01Ca0.23Fe''0.69Mg0.99Fe'''0.04Ti0.00Al0.12Si1.92O6	50.7634	0.0816879	2.79921	1.32537	0	21.6726	0	17.4835	5.75207	0.122135	0	0
2000	1032	0.042587	0.095063	-487.735	0.012549	0.049519	cpx	Na0.01Ca0.23Fe''0.69Mg0.98Fe'''0.04Ti0.00Al0.12Si1.92O6	50.737	0.0820671	2.79692	1.33053	0	21.7759	0	17.4195	5.7359	0.122223	0	0
2000	1031	0.042183	0.094105	-482.658	0.012424	0.049023	cpx	Na0.01Ca0.23Fe''0.69Mg0.98Fe'''0.04Ti0.00Al0.12Si1.92O6	50.7105	0.0824444	2.79462	1.33573	0	21.8797	0	17.3551	5.71969	0.122309	0	0
2000	1030	0.041784	0.093159	-477.647	0.012301	0.048533	cpx	Na0.01Ca0.23Fe''0.70Mg0.98Fe'''0.04Ti0.00Al0.12Si1.92O6	50.6838	0.0828197	2.79231	1.34096	0	21.9839	0	17.2904	5.70343	0.122393	0	0
2000	1029	0.04139	0.092226	-472.701	0.012179	0.048049	cpx	Na0.01Ca0.23Fe''0.70Mg0.97Fe'''0.04Ti0.00Al0.12Si1.92O6	50.657	0.0831929	2.79	1.34624	0	22.0887	0	17.2253	5.68712	0.122473	0	0
2000	1028	0.041002	0.091306	-467.819	0.012059	0.047571	cpx	Na0.01Ca0.23Fe''0.70Mg0.97Fe'''0.04Ti0.00Al0.12Si1.92O6	50.63	0.083564	2.78769	1.35156	0	22.1939	0	17.1599	5.67076	0.122552	0	0
2000	1027	0.040618	0.090397	-463	0.011941	0.0471	cpx	Na0.01Ca0.23Fe''0.71Mg0.97Fe'''0.04Ti0.00Al0.12Si1.92O6	50.6029	0.0839328	2.78536	1.35692	0	22.2997	0	17.0942	5.65435	0.122627	0	0
2000	1026	0.040239	0.0895	-458.242	0.011824	0.046635	cpx	Na0.01Ca0.23Fe''0.71Mg0.96Fe'''0.04Ti0.00Al0.12Si1.92O6	50.5757	0.0842992	2.78303	1.36232	0	22.4059	0	17.0281	5.63791	0.1227	0	0
2000	1025	0.039865	0.088614	-453.544	0.011709	0.046175	cpx	Na0.01Ca0.23Fe''0.72Mg0.96Fe'''0.04Ti0.00Al0.12Si1.92O6	50.5483	0.0846629	2.78069	1.36775	0	22.5127	0	16.9617	5.62142	0.122771	0	0
2000	1024	0.039496	0.08774	-448.905	0.011595	0.045721	cpx	Na0.01Ca0.23Fe''0.72Mg0.96Fe'''0.04Ti0.00Al0.12Si1.92O6	50.5208	0.085024	2.77834	1.37323	0	22.6199	0	16.895	5.60489	0.122839	0	0
2000	1023	0.039131	0.086877	-444.329	0.011482	0.045274	cpx	Na0.01Ca0.23Fe''0.72Mg0.95Fe'''0.04Ti0.00Al0.12Si1.92O6	50.4931	0.0853823	2.77599	1.37875	0	22.7276	0	16.8279	5.58832	0.122904	0	0
2000	1022	0.038772	0.086028	-439.82	0.011372	0.044833	cpx	Na0.01Ca0.23Fe''0.73Mg0.95Fe'''0.04Ti0.00Al0.12Si1.92O6	50.4653	0.0857375	2.77362	1.38431	0	22.8358	0	16.7605	5.57171	0.122966	0	0
2000	1021	0.038418	0.085189	-435.367	0.011262	0.044398	cpx	Na0.01Ca0.23Fe''0.73Mg0.95Fe'''0.04Ti0.00Al0.12Si1.92O6	50.4373	0.0860895	2.77124	1.38992	0	22.9446	0	16.6928	5.55506	0.123026	0	0
2000	1020	0.038068	0.08436	-430.967	0.011154	0.043968	cpx	Na0.01Ca0.23Fe''0.73Mg0.94Fe'''0.04Ti0.00Al0.12Si1.92O6	50.4092	0.0864382	2.76885	1.39556	0	23.0538	0	16.6247	5.53839	0.123083	0	0
2000	1019	0.037721	0.083542	-426.62	0.011048	0.043543	cpx	Na0.01Ca0.23Fe''0.74Mg0.94Fe'''0.04Ti0.00Al0.12Si1.92O6	50.381	0.0867834	2.76645	1.40124	0	23.1635	0	16.5562	5.52168	0.123138	0	0
2000	1018	0.037379	0.082733	-422.324	0.010942	0.043123	cpx	Na0.01Ca0.22Fe''0.74Mg0.94Fe'''0.04Ti0.00Al0.12Si1.92O6	50.3526	0.0871247	2.76403	1.40697	0	23.2737	0	16.4874	5.50493	0.12319	0	0
2000	1017	0.037041	0.081933	-418.079	0.010838	0.042707	cpx	Na0.01Ca0.22Fe''0.75Mg0.93Fe'''0.04Ti0.00Al0.12Si1.92O6	50.3241	0.0874622	2.76161	1.41274	0	23.3844	0	16.4183	5.48816	0.123239	0	0
2000	1016	0.036707	0.081144	-413.883	0.010735	0.042297	cpx	Na0.01Ca0.22Fe''0.75Mg0.93Fe'''0.04Ti0.00Al0.12Si1.92O6	50.2954	0.0877954	2.75916	1.41855	0	23.4956	0	16.3488	5.47136	0.123286	0	0
2000	1015	0.036376	0.080363	-409.735	0.010633	0.041892	cpx	Na0.01Ca0.22Fe''0.75Mg0.93Fe'''0.04Ti0.00Al0.12Si1.92O6	50.2666	0.0881243	2.7567	1.4244	0	23.6073	0	16.279	5.45454	0.123329	0	0
2000	1014	0.036049	0.079591	-405.633	0.010532	0.041491	cpx	Na0.01Ca0.22Fe''0.76Mg0.92Fe'''0.04Ti0.00Al0.12Si1.92O6	50.2377	0.0884485	2.75423	1.4303	0	23.7194	0	16.2088	5.43769	0.12337	0	0
2000	1013	0.035726	0.078828	-401.578	0.010433	0.041094	cpx	Na0.01Ca0.22Fe''0.76Mg0.92Fe'''0.04Ti0.00Al0.12Si1.92O6	50.2086	0.0887677	2.75173	1.43623	0	23.8321	0	16.1383	5.42082	0.123409	0	0
2000	1012	0.035406	0.078073	-397.567	0.010334	0.040702	cpx	Na0.01Ca0.22Fe''0.77Mg0.92Fe'''0.04Ti0.00Al0.12Si1.92O6	50.1794	0.0890818	2.74922	1.44221	0	23.9452	0	16.0674	5.40394	0.123445	0	0
2000	1011	0.03509	0.077326	-393.599	0.010237	0.040314	cpx	Na0.01Ca0.22Fe''0.77Mg0.91Fe'''0.04Ti0.00Al0.12Si1.92O6	50.1501	0.0893903	2.74669	1.44823	0	24.0589	0	15.9962	5.38703	0.123478	0	0
2000	1010	0.034777	0.076587	-389.673	0.01014	0.03993	cpx	Na0.01Ca0.22Fe''0.77Mg0.91Fe'''0.04Ti0.00Al0.12Si1.92O6	50.1206	0.0896931	2.74414	1.4543	0	24.173	0	15.9247	5.37011	0.123508	0	0
2000	1009	0.034467	0.075856	-385.788	0.010045	0.03955	cpx	Na0.01Ca0.22Fe''0.78Mg0.91Fe'''0.04Ti0.00Al0.12Si1.92O6	50.091	0.0899896	2.74157	1.4604	0	24.2876	0	15.8528	5.35318	0.123535	0	0
2000	1008	0.034159	0.075133	-381.941	0.00995	0.039174	cpx	Na0.01Ca0.22Fe''0.78Mg0.90Fe'''0.04Ti0.00Al0.12Si1.92O6	50.0612	0.0902797	2.73897	1.46654	0	24.4026	0	15.7805	5.33624	0.12356	0	0
2000	1007	0.033855	0.074416	-378.132	0.009857	0.038801	cpx	Na0.01Ca0.22Fe''0.79Mg0.90Fe'''0.04Ti0.00Al0.12Si1.92O6	50.0314	0.0905628	2.73635	1.47273	0	24.5182	0	15.708	5.31929	0.123582	0	0
2000	1006	0.033554	0.073706	-374.357	0.009764	0.038432	cpx	Na0.01Ca0.22Fe''0.79Mg0.89Fe'''0.04Ti0.00Al0.12Si1.92O6	50.0014	0.0908386	2.73371	1.47895	0	24.6342	0	15.635	5.30234	0.123602	0	0
2000	1005	0.033254	0.073001	-370.614	0.009672	0.038065	cpx	Na0.01Ca0.22Fe''0.79Mg0.89Fe'''0.04Ti0.00Al0.12Si1.92O6	49.9712	0.0911064	2.73104	1.48522	0	24.7506	0	15.5618	5.28539	0.123618	0	0
2000	1004	0.032957	0.072302	-366.899	0.00958	0.037702	cpx	Na0.01Ca0.22Fe''0.80Mg0.89Fe'''0.04Ti0.00Al0.12Si1.92O6	49.941	0.0913658	2.72833	1.49152	0	24.8675	0	15.4882	5.26843	0.123632	0	0
2000	1003	0.032661	0.071607	-363.206	0.00949	0.03734	cpx	Na0.01Ca0.22Fe''0.80Mg0.88Fe'''0.04Ti0.00Al0.12Si1.92O6	49.9107	0.0916159	2.7256	1.49786	0	24.9849	0	15.4143	5.25149	0.123643	0	0
2000	1002	0.032366	0.070914	-359.527	0.009399	0.03698	cpx	Na0.01Ca0.22Fe''0.81Mg0.88Fe'''0.04Ti0.00Al0.12Si1.92O6	49.8802	0.0918558	2.72283	1.50423	0	25.1026	0	15.3401	5.23455	0.123651	0	0
2000	1001	0.032071	0.070221	-355.85	0.009308	0.036619	cpx	Na0.01Ca0.22Fe''0.81Mg0.88Fe'''0.04Ti0.00Al0.12Si1.92O6	49.8496	0.0920844	2.72003	1.51063	0	25.2208	0	15.2655	5.21764	0.123657	0	0
2000	1000	0.031773	0.069524	-352.15	0.009217	0.036256	cpx	Na0.01Ca0.21Fe''0.82Mg0.87Fe'''0.04Ti0.00Al0.12Si1.92O6	49.819	0.0922997	2.71718	1.51706	0	25.3393	0	15.1907	5.20074	0.12366	0	0
2000	999	0.031469	0.068812	-348.383	0.009124	0.035886	cpx	Na0.01Ca0.21Fe''0.82Mg0.87Fe'''0.04Ti0.00Al0.12Si1.92O6	49.7883	0.0924988	2.71428	1.52351	0	25.4582	0	15.1157	5.18388	0.12366	0	0
2000	998	0.031148	0.068067	-344.447	0.009026	0.035498	cpx	Na0.01Ca0.21Fe''0.82Mg0.86Fe'''0.04Ti0.00Al0.12Si1.92O6	49.7576	0.0926762	2.7113	1.52996	0	25.5773	0	15.0404	5.16708	0.123657	0	0
2000	997	0.030786	0.067231	-340.055	0.008917	0.035063	cpx	Na0.01Ca0.21Fe''0.83Mg0.86Fe'''0.04Ti0.00Al0.12Si1.92O6	49.727	0.0928188	2.70822	1.53637	0	25.6963	0	14.9652	5.15038	0.123651	0	0
2000	996	0.030275	0.066072	-334.038	0.008764	0.034459	cpx	Na0.01Ca0.21Fe''0.83Mg0.86Fe'''0.04Ti0.00Al0.12Si1.92O6	49.6969	0.092884	2.70489	1.5426	0	25.8146	0	14.8906	5.13393	0.123642	0	0
2000	995	0.030159	0.065774	-332.376	0.008726	0.034304	cpx	Na0.01Ca0.21Fe''0.84Mg0.85Fe'''0.05Ti0.00Al0.12Si1.92O6	49.6663	0.0929773	2.70165	1.54899	0	25.934	0	14.815	5.11737	0.12363	0	0
2000	994	0.024262	0.052882	-267.178	0.007017	0.027584	cpx	Na0.01Ca0.21Fe''0.84Mg0.85Fe'''0.05Ti0.00Al0.12Si1.92O6	49.6498	0.0914922	2.69348	1.5503	0	26.0247	0	14.7605	5.10615	0.123596	0	0
2000	993	0.023985	0.052246	-263.909	0.006934	0.027255	cpx	Na0.01Ca0.21Fe''0.84Mg0.85Fe'''0.05Ti0.00Al0.12Si1.92O6	49.6332	0.0900237	2.68533	1.55162	0	26.1155	0	14.7058	5.09491	0.123561	0	0
2000	992	0.023711	0.051618	-260.686	0.006853	0.026931	cpx	Na0.01Ca0.21Fe''0.85Mg0.84Fe'''0.05Ti0.00Al0.12Si1.92O6	49.6165	0.0885714	2.67719	1.55296	0	26.2066	0	14.651	5.08366	0.123524	0	0
2000	991	0.023441	0.050999	-257.508	0.006772	0.026611	cpx	Na0.01Ca0.21Fe''0.85Mg0.84Fe'''0.05Ti0.00Al0.12Si1.92O6	49.5997	0.0871354	2.66907	1.5543	0	26.2979	0	14.596	5.0724	0.123485	0	0
2000	990	0.023175	0.050389	-254.375	0.006692	0.026296	cpx	Na0.01Ca0.21Fe''0.85Mg0.84Fe'''0.05Ti0.00Al0.12Si1.92O6	49.5829	0.0857156	2.66096	1.55566	0	26.3894	0	14.5408	5.06113	0.123445	0	0
2000	989	0.022912	0.049788	-251.284	0.006614	0.025984	cpx	Na0.01Ca0.21Fe''0.86Mg0.84Fe'''0.05Ti0.00Al0.12Si1.92O6	49.5659	0.0843117	2.65287	1.55703	0	26.4811	0	14.4855	5.04985	0.123404	0	0
2000	988	0.022653	0.049194	-248.237	0.006537	0.025678	cpx	Na0.01Ca0.21Fe''0.86Mg0.83Fe'''0.05Ti0.00Al0.12Si1.92O6	49.5489	0.0829237	2.64479	1.55841	0	26.5731	0	14.43	5.03856	0.123361	0	0
2000	987	0.022397	0.048609	-245.231	0.00646	0.025375	cpx	Na0.01Ca0.21Fe''0.86Mg0.83Fe'''0.05Ti0.00Al0.12Si1.92O6	49.5317	0.0815514	2.63672	1.5598	0	26.6652	0	14.3744	5.02726	0.123316	0	0
2000	986	0.022145	0.048031	-242.267	0.006385	0.025076	cpx	Na0.01Ca0.21Fe''0.87Mg0.83Fe'''0.05Ti0.00Al0.12Si1.92O6	49.5145	0.0801948	2.62867	1.5612	0	26.7576	0	14.3186	5.01595	0.12327	0	0
2000	985	0.021896	0.047462	-239.342	0.006311	0.024782	cpx	Na0.01Ca0.21Fe''0.87Mg0.82Fe'''0.05Ti0.00Al0.12Si1.92O6	49.4972	0.0788537	2.62063	1.56261	0	26.8502	0	14.2626	5.00464	0.123223	0	0
2000	984	0.02165	0.0469	-236.457	0.006237	0.024491	cpx	Na0.01Ca0.21Fe''0.87Mg0.82Fe'''0.05Ti0.00Al0.12Si1.92O6	49.4799	0.077528	2.6126	1.56403	0	26.943	0	14.2065	4.99332	0.123174	0	0
2000	983	0.021407	0.046345	-233.61	0.006165	0.024204	cpx	Na0.01Ca0.21Fe''0.88Mg0.82Fe'''0.05Ti0.00Al0.12Si1.92O6	49.4624	0.0762176	2.60458	1.56546	0	27.036	0	14.1502	4.982	0.123124	0	0
2000	982	0.021168	0.045798	-230.802	0.006094	0.023921	cpx	Na0.01Ca0.21Fe''0.88Mg0.82Fe'''0.05Ti0.00Al0.12Si1.92O6	49.4449	0.0749223	2.59658	1.56691	0	27.1292	0	14.0938	4.97067	0.123072	0	0
2000	981	0.020931	0.045258	-228.03	0.006023	0.023642	cpx	Na0.01Ca0.21Fe''0.88Mg0.81Fe'''0.05Ti0.00Al0.12Si1.92O6	49.4273	0.0736422	2.58858	1.56836	0	27.2226	0	14.0372	4.95934	0.123019	0	0
2000	980	0.020698	0.044725	-225.295	0.005954	0.023366	cpx	Na0.01Ca0.21Fe''0.89Mg0.81Fe'''0.05Ti0.00Al0.12Si1.92O6	49.4096	0.072377	2.5806	1.56982	0	27.3162	0	13.9805	4.94801	0.122964	0	0
2000	979	0.020467	0.0442	-222.596	0.005885	0.023094	cpx	Na0.01Ca0.21Fe''0.89Mg0.81Fe'''0.05Ti0.00Al0.12Si1.92O6	49.3918	0.0711266	2.57262	1.57129	0	27.41	0	13.9236	4.93668	0.122908	0	0
2000	978	0.02024	0.043681	-219.932	0.005817	0.022825	cpx	Na0.01Ca0.21Fe''0.89Mg0.80Fe'''0.05Ti0.00Al0.12Si1.92O6	49.3739	0.069891	2.56466	1.57277	0	27.504	0	13.8665	4.92535	0.122851	0	0
2000	977	0.020015	0.043168	-217.302	0.00575	0.02256	cpx	Na0.01Ca0.20Fe''0.90Mg0.80Fe'''0.05Ti0.00Al0.12Si1.92O6	49.356	0.06867	2.5567	1.57426	0	27.5983	0	13.8093	4.91402	0.122792	0	0
2000	976	0.019793	0.042662	-214.706	0.005684	0.022298	cpx	Na0.01Ca0.20Fe''0.90Mg0.80Fe'''0.05Ti0.00Al0.12Si1.92O6	49.338	0.0674636	2.54875	1.57576	0	27.6927	0	13.7519	4.90269	0.122731	0	0
2000	975	0.019573	0.042163	-212.143	0.005619	0.022039	cpx	Na0.01Ca0.20Fe''0.91Mg0.80Fe'''0.05Ti0.00Al0.12Si1.92O6	49.3199	0.0662715	2.54082	1.57726	0	27.7873	0	13.6944	4.89136	0.12267	0	0
2000	974	0.019357	0.04167	-209.613	0.005554	0.021784	cpx	Na0.01Ca0.20Fe''0.91Mg0.79Fe'''0.05Ti0.00Al0.12Si1.92O6	49.3017	0.0650938	2.53289	1.57878	0	27.8821	0	13.6368	4.88004	0.122607	0	0
2000	973	0.019142	0.041183	-207.114	0.005491	0.021532	cpx	Na0.01Ca0.20Fe''0.91Mg0.79Fe'''0.05Ti0.00Al0.12Si1.92O6	49.2835	0.0639302	2.52496	1.5803	0	27.9771	0	13.579	4.86873	0.122542	0	0
2000	972	0.018931	0.040702	-204.647	0.005428	0.021283	cpx	Na0.01Ca0.20Fe''0.92Mg0.79Fe'''0.05Ti0.00Al0.12Si1.92O6	49.2652	0.0627808	2.51705	1.58183	0	28.0723	0	13.521	4.85742	0.122476	0	0
2000	971	0.018722	0.040227	-202.21	0.005366	0.021037	cpx	Na0.01Ca0.20Fe''0.92Mg0.78Fe'''0.05Ti0.00Al0.12Si1.92O6	49.2468	0.0616454	2.50914	1.58337	0	28.1677	0	13.4629	4.84611	0.122409	0	0
2000	970	0.018515	0.039757	-199.803	0.005304	0.020793	cpx	Na0.01Ca0.20Fe''0.92Mg0.78Fe'''0.05Ti0.00Al0.12Si1.92O6	49.2283	0.0605238	2.50124	1.58492	0	28.2632	0	13.4046	4.83482	0.12234	0	0
2000	969	0.018311	0.039294	-197.425	0.005244	0.020553	cpx	Na0.01Ca0.20Fe''0.93Mg0.78Fe'''0.05Ti0.00Al0.11Si1.92O6	49.2098	0.0594161	2.49334	1.58647	0	28.359	0	13.3462	4.82353	0.12227	0	0
2000	968	0.018109	0.038836	-195.077	0.005184	0.020316	cpx	Na0.01Ca0.20Fe''0.93Mg0.77Fe'''0.05Ti0.00Al0.11Si1.92O6	49.1912	0.058322	2.48545	1.58803	0	28.4549	0	13.2877	4.81225	0.122199	0	0
2000	967	0.01791	0.038383	-192.756	0.005124	0.020081	cpx	Na0.01Ca0.20Fe''0.93Mg0.77Fe'''0.05Ti0.00Al0.11Si1.92O6	49.1725	0.0572416	2.47756	1.58959	0	28.551	0	13.229	4.80098	0.122126	0	0
2000	966	0.017712	0.037936	-190.463	0.005066	0.01985	cpx	Na0.01Ca0.20Fe''0.94Mg0.77Fe'''0.05Ti0.00Al0.11Si1.92O6	49.1538	0.0561746	2.46968	1.59116	0	28.6473	0	13.1702	4.78972	0.122052	0	0
2000	965	0.017517	0.037494	-188.198	0.005008	0.01962	cpx	Na0.01Ca0.20Fe''0.94Mg0.76Fe'''0.05Ti0.00Al0.11Si1.92O6	49.135	0.0551211	2.46181	1.59273	0	28.7437	0	13.1112	4.77848	0.121977	0	0
2000	964	0.017324	0.037057	-185.959	0.004951	0.019394	cpx	Na0.01Ca0.20Fe''0.94Mg0.76Fe'''0.05Ti0.00Al0.11Si1.92O6	49.1161	0.0540808	2.45393	1.59431	0	28.8403	0	13.0521	4.76725	0.1219	0	0
2000	963	0.017134	0.036626	-183.746	0.004894	0.01917	cpx	Na0.01Ca0.20Fe''0.95Mg0.76Fe'''0.05Ti0.00Al0.11Si1.92O6	49.0972	0.0530538	2.44607	1.5959	0	28.9371	0	12.9929	4.75603	0.121822	0	0
2000	962	0.016945	0.036199	-181.558	0.004838	0.018949	cpx	Na0.01Ca0.20Fe''0.95Mg0.76Fe'''0.05Ti0.00Al0.11Si1.92O6	49.0782	0.0520398	2.4382	1.59749	0	29.034	0	12.9335	4.74482	0.121743	0	0
2000	961	0.016758	0.035777	-179.396	0.004783	0.01873	cpx	Na0.01Ca0.20Fe''0.96Mg0.75Fe'''0.05Ti0.00Al0.11Si1.92O6	49.0592	0.0510389	2.43034	1.59908	0	29.1311	0	12.874	4.73363	0.121662	0	0
2000	960	0.016573	0.035359	-177.258	0.004728	0.018513	cpx	Na0.01Ca0.20Fe''0.96Mg0.75Fe'''0.05Ti0.00Al0.11Si1.92O6	49.0401	0.0500509	2.42248	1.60067	0	29.2283	0	12.8144	4.72246	0.12158	0	0
2000	959	0.016391	0.034947	-175.144	0.004674	0.018299	cpx	Na0.01Ca0.20Fe''0.96Mg0.75Fe'''0.05Ti0.00Al0.11Si1.92O6	49.0209	0.0490757	2.41462	1.60227	0	29.3257	0	12.7547	4.7113	0.121497	0	0
[truncated: 2,509 more rows]
