# Supplementary material for: A 5-km-thick reservoir with > 380,000 km3 of magma within the ancient Earth's crust
Source: Sci Rep. 2022 Sep 19;12:15651. doi: 10.1038/s41598-022-19915-w (PMC9485162; doi:10.1038/s41598-022-19915-w)
Supplement: Supplementary file 19 — Supplementary Information 19. [file 41598_2022_19915_MOESM19_ESM.xlsx]

## Sheet: alphaMELTS_tbl
SupplTable S4B-5 - Fractional crystallization of the mix O50R50
System	Thermodynamic	Data:
Pressure	Temperature	mass	F	phi	S	H	V	dVdP*10^6	dVdT*10^6	Cp	logfO2(absolute)	logfO2-QFM	rhol	rhos	viscosity	aH2O	chisqr
2000	1400	99.9969	1	1	293.666	-1.23075e+06	39.7776	-323.889	3045.74	150.454	-6.318	0	2.5139	0	2.064	0.054284	0
2000	1400	99.9969	1	1	293.666	-1.23075e+06	39.7776	-323.889	3045.74	150.454	-6.318	0	2.5139	0	2.064	0.054284	0
2000	1399	99.9969	1	1	293.576	-1.2309e+06	39.7746	-323.853	3045.63	150.454	-6.327	0	2.51409	0	2.068	0.0542765	0
2000	1398	99.9969	1	1	293.486	-1.23105e+06	39.7716	-323.817	3045.53	150.453	-6.336	0	2.51428	0	2.072	0.054269	0
2000	1397	99.9969	1	1	293.396	-1.2312e+06	39.7685	-323.781	3045.42	150.453	-6.345	0	2.51447	0	2.076	0.0542615	0
2000	1396	99.9969	1	1	293.306	-1.23136e+06	39.7655	-323.745	3045.31	150.453	-6.353	0	2.51467	0	2.08	0.0542541	0
2000	1395	99.997	1	1	293.216	-1.23151e+06	39.7625	-323.709	3045.21	150.453	-6.362	0	2.51486	0	2.084	0.0542466	0
2000	1394	99.997	1	1	293.126	-1.23166e+06	39.7594	-323.673	3045.1	150.452	-6.371	0	2.51505	0	2.087	0.0542391	0
2000	1393	99.997	1	1	293.036	-1.23181e+06	39.7564	-323.637	3044.99	150.452	-6.38	0	2.51524	0	2.091	0.0542317	0
2000	1392	99.997	1	1	292.945	-1.23196e+06	39.7534	-323.601	3044.88	150.452	-6.388	0	2.51544	0	2.095	0.0542242	0
2000	1391	99.997	1	1	292.855	-1.23211e+06	39.7503	-323.565	3044.78	150.451	-6.397	0	2.51563	0	2.099	0.0542168	0
2000	1390	99.997	1	1	292.765	-1.23226e+06	39.7473	-323.529	3044.67	150.451	-6.406	0	2.51582	0	2.103	0.0542094	0
2000	1389	99.997	1	1	292.674	-1.23241e+06	39.7443	-323.494	3044.56	150.451	-6.415	0	2.51601	0	2.107	0.0542019	0
2000	1388	99.997	1	1	292.584	-1.23256e+06	39.7412	-323.458	3044.45	150.451	-6.424	0	2.5162	0	2.111	0.0541945	0
2000	1387	99.9971	1	1	292.493	-1.23271e+06	39.7382	-323.422	3044.34	150.45	-6.433	0	2.5164	0	2.115	0.0541871	0
2000	1386	99.9971	1	1	292.403	-1.23286e+06	39.7352	-323.386	3044.23	150.45	-6.442	0	2.51659	0	2.119	0.0541797	0
2000	1385	99.9971	1	1	292.312	-1.23301e+06	39.7321	-323.35	3044.12	150.45	-6.45	0	2.51678	0	2.123	0.0541722	0
2000	1384	99.9971	1	1	292.221	-1.23316e+06	39.7291	-323.314	3044	150.45	-6.459	0	2.51697	0	2.127	0.0541648	0
2000	1383	99.9971	1	1	292.13	-1.23331e+06	39.7261	-323.278	3043.89	150.449	-6.468	0	2.51717	0	2.131	0.0541574	0
2000	1382	99.9971	1	1	292.04	-1.23346e+06	39.723	-323.243	3043.78	150.449	-6.477	0	2.51736	0	2.134	0.05415	0
2000	1381	99.9971	1	1	291.949	-1.23361e+06	39.72	-323.207	3043.67	150.449	-6.486	0	2.51755	0	2.138	0.0541427	0
2000	1380	99.9971	1	1	291.858	-1.23377e+06	39.717	-323.171	3043.55	150.449	-6.495	0	2.51774	0	2.142	0.0541353	0
2000	1379	99.9972	1	1	291.767	-1.23392e+06	39.7139	-323.135	3043.44	150.448	-6.504	0	2.51794	0	2.146	0.0541279	0
2000	1378	99.9972	1	1	291.676	-1.23407e+06	39.7109	-323.1	3043.33	150.448	-6.513	0	2.51813	0	2.15	0.0541205	0
2000	1377	99.9972	1	1	291.585	-1.23422e+06	39.7079	-323.064	3043.21	150.448	-6.522	0	2.51832	0	2.154	0.0541132	0
2000	1376	99.9972	1	1	291.493	-1.23437e+06	39.7049	-323.028	3043.1	150.447	-6.531	0	2.51851	0	2.158	0.0541058	0
2000	1375	99.9972	1	1	291.402	-1.23452e+06	39.7018	-322.992	3042.98	150.447	-6.54	0	2.51871	0	2.162	0.0540985	0
2000	1374	99.9972	1	1	291.311	-1.23467e+06	39.6988	-322.957	3042.86	150.447	-6.549	0	2.5189	0	2.166	0.0540911	0
2000	1373	99.9972	1	1	291.22	-1.23482e+06	39.6958	-322.921	3042.75	150.447	-6.558	0	2.51909	0	2.17	0.0540838	0
2000	1372	99.9973	1	1	291.128	-1.23497e+06	39.6927	-322.885	3042.63	150.446	-6.567	0	2.51928	0	2.174	0.0540765	0
2000	1371	99.9973	1	1	291.037	-1.23512e+06	39.6897	-322.85	3042.51	150.446	-6.576	0	2.51948	0	2.178	0.0540692	0
2000	1370	99.9973	1	1	290.945	-1.23527e+06	39.6867	-322.814	3042.4	150.446	-6.585	0	2.51967	0	2.182	0.0540619	0
2000	1369	99.9973	1	1	290.854	-1.23542e+06	39.6836	-322.779	3042.28	150.446	-6.594	0	2.51986	0	2.186	0.0540545	0
2000	1368	99.9973	1	1	290.762	-1.23557e+06	39.6806	-322.743	3042.16	150.445	-6.603	0	2.52005	0	2.19	0.0540473	0
2000	1367	99.9973	1	1	290.67	-1.23572e+06	39.6776	-322.707	3042.04	150.445	-6.612	0	2.52025	0	2.194	0.05404	0
2000	1366	99.9974	1	1	290.579	-1.23587e+06	39.6746	-322.672	3041.92	150.445	-6.621	0	2.52044	0	2.198	0.0540327	0
2000	1365	99.9974	1	1	290.487	-1.23603e+06	39.6715	-322.636	3041.8	150.445	-6.63	0	2.52063	0	2.202	0.0540254	0
2000	1364	99.9974	1	1	290.395	-1.23618e+06	39.6685	-322.601	3041.68	150.444	-6.64	0	2.52082	0	2.206	0.0540181	0
2000	1363	99.9974	1	1	290.303	-1.23633e+06	39.6655	-322.565	3041.56	150.444	-6.649	0	2.52102	0	2.21	0.0540109	0
2000	1362	99.9974	1	1	290.211	-1.23648e+06	39.6625	-322.53	3041.44	150.444	-6.658	0	2.52121	0	2.214	0.0540036	0
2000	1361	99.9974	1	1	290.119	-1.23663e+06	39.6594	-322.494	3041.32	150.444	-6.667	0	2.5214	0	2.218	0.0539964	0
2000	1360	99.9974	1	1	290.027	-1.23678e+06	39.6564	-322.459	3041.2	150.443	-6.676	0	2.5216	0	2.223	0.0539891	0
2000	1359	99.9975	1	1	289.935	-1.23693e+06	39.6534	-322.423	3041.07	150.443	-6.685	0	2.52179	0	2.227	0.0539819	0
2000	1358	99.9975	1	1	289.843	-1.23708e+06	39.6503	-322.388	3040.95	150.443	-6.694	0	2.52198	0	2.231	0.0539747	0
2000	1357	99.9975	1	1	289.751	-1.23723e+06	39.6473	-322.352	3040.83	150.443	-6.704	0	2.52217	0	2.235	0.0539674	0
2000	1356	99.9975	1	1	289.658	-1.23738e+06	39.6443	-322.317	3040.71	150.442	-6.713	0	2.52237	0	2.239	0.0539602	0
2000	1355	99.9975	1	1	289.566	-1.23753e+06	39.6413	-322.282	3040.58	150.442	-6.722	0	2.52256	0	2.243	0.053953	0
2000	1354	99.9975	1	1	289.474	-1.23768e+06	39.6382	-322.246	3040.46	150.442	-6.731	0	2.52275	0	2.247	0.0539458	0
2000	1353	99.9976	1	1	289.381	-1.23783e+06	39.6352	-322.211	3040.33	150.442	-6.741	0	2.52295	0	2.251	0.0539386	0
2000	1352	99.9976	1	1	289.289	-1.23798e+06	39.6322	-322.176	3040.21	150.441	-6.75	0	2.52314	0	2.255	0.0539314	0
2000	1351	99.9976	1	1	289.196	-1.23813e+06	39.6292	-322.14	3040.08	150.441	-6.759	0	2.52333	0	2.259	0.0539243	0
2000	1350	99.9976	1	1	289.104	-1.23829e+06	39.6261	-322.105	3039.95	150.441	-6.768	0	2.52353	0	2.263	0.0539171	0
2000	1349	99.9976	1	1	289.011	-1.23844e+06	39.6231	-322.07	3039.83	150.441	-6.778	0	2.52372	0	2.267	0.0539099	0
2000	1348	99.9977	1	1	288.918	-1.23859e+06	39.6201	-322.034	3039.7	150.44	-6.787	0	2.52391	0	2.272	0.0539028	0
2000	1347	99.9977	1	1	288.825	-1.23874e+06	39.6171	-321.999	3039.57	150.44	-6.796	0	2.52411	0	2.276	0.0538957	0
2000	1346	99.9977	1	1	288.733	-1.23889e+06	39.6141	-321.964	3039.44	150.44	-6.806	0	2.5243	0	2.28	0.0538885	0
2000	1345	99.9977	1	1	288.64	-1.23904e+06	39.611	-321.929	3039.32	150.44	-6.815	0	2.52449	0	2.284	0.0538814	0
2000	1344	99.9977	1	1	288.547	-1.23919e+06	39.608	-321.893	3039.19	150.44	-6.824	0	2.52468	0	2.288	0.0538743	0
2000	1343	99.9977	1	1	288.454	-1.23934e+06	39.605	-321.858	3039.06	150.439	-6.834	0	2.52488	0	2.292	0.0538672	0
2000	1342	99.9978	1	1	288.361	-1.23949e+06	39.602	-321.823	3038.93	150.439	-6.843	0	2.52507	0	2.296	0.0538601	0
2000	1341	99.9978	1	1	288.268	-1.23964e+06	39.5989	-321.788	3038.8	150.439	-6.852	0	2.52526	0	2.301	0.053853	0
2000	1340	99.9978	1	1	288.174	-1.23979e+06	39.5959	-321.753	3038.67	150.439	-6.862	0	2.52546	0	2.305	0.0538459	0
2000	1339	99.9978	1	1	288.081	-1.23994e+06	39.5929	-321.717	3038.54	150.438	-6.871	0	2.52565	0	2.309	0.0538388	0
2000	1338	99.9978	1	1	287.988	-1.24009e+06	39.5899	-321.682	3038.41	150.438	-6.88	0	2.52584	0	2.313	0.0538318	0
2000	1337	99.9979	1	1	287.894	-1.24024e+06	39.5869	-321.647	3038.27	150.438	-6.89	0	2.52604	0	2.317	0.0538247	0
2000	1336	99.9979	1	1	287.801	-1.24039e+06	39.5838	-321.612	3038.14	150.438	-6.899	0	2.52623	0	2.321	0.0538176	0
2000	1335	99.9979	1	1	287.708	-1.24055e+06	39.5808	-321.577	3038.01	150.437	-6.909	0	2.52642	0	2.326	0.0538106	0
2000	1334	99.9979	1	1	287.614	-1.2407e+06	39.5778	-321.542	3037.88	150.437	-6.918	0	2.52662	0	2.33	0.0538036	0
2000	1333	99.9979	1	1	287.52	-1.24085e+06	39.5748	-321.507	3037.74	150.437	-6.928	0	2.52681	0	2.334	0.0537965	0
2000	1332	99.998	1	1	287.427	-1.241e+06	39.5718	-321.472	3037.61	150.437	-6.937	0	2.527	0	2.338	0.0537895	0
2000	1331	99.998	1	1	287.333	-1.24115e+06	39.5687	-321.437	3037.47	150.437	-6.947	0	2.5272	0	2.342	0.0537825	0
2000	1330	99.998	1	1	287.239	-1.2413e+06	39.5657	-321.402	3037.34	150.436	-6.956	0	2.52739	0	2.347	0.0537755	0
2000	1329	99.998	1	1	287.145	-1.24145e+06	39.5627	-321.367	3037.2	150.436	-6.966	0	2.52758	0	2.351	0.0537685	0
2000	1328	99.998	1	1	287.052	-1.2416e+06	39.5597	-321.332	3037.07	150.436	-6.975	0	2.52778	0	2.355	0.0537616	0
2000	1327	99.9981	1	1	286.958	-1.24175e+06	39.5567	-321.297	3036.93	150.436	-6.985	0	2.52797	0	2.359	0.0537546	0
2000	1326	99.9981	1	1	286.864	-1.2419e+06	39.5536	-321.262	3036.8	150.435	-6.994	0	2.52816	0	2.363	0.0537476	0
2000	1325	99.9981	1	1	286.77	-1.24205e+06	39.5506	-321.227	3036.66	150.435	-7.004	0	2.52836	0	2.368	0.0537407	0
2000	1324	99.9981	1	1	286.676	-1.2422e+06	39.5476	-321.192	3036.52	150.435	-7.013	0	2.52855	0	2.372	0.0537337	0
2000	1323	99.9981	1	1	286.581	-1.24235e+06	39.5446	-321.157	3036.38	150.435	-7.023	0	2.52874	0	2.376	0.0537268	0
2000	1322	99.9982	1	1	286.487	-1.24251e+06	39.5416	-321.122	3036.25	150.435	-7.033	0	2.52894	0	2.38	0.0537199	0
2000	1321	99.9982	1	1	286.393	-1.24266e+06	39.5385	-321.088	3036.11	150.434	-7.042	0	2.52913	0	2.385	0.053713	0
2000	1320	99.9982	1	1	286.298	-1.24281e+06	39.5355	-321.053	3035.97	150.434	-7.052	0	2.52933	0	2.389	0.0537061	0
2000	1319	99.9982	1	1	286.204	-1.24296e+06	39.5325	-321.018	3035.83	150.434	-7.062	0	2.52952	0	2.393	0.0536992	0
2000	1318	99.9983	1	1	286.11	-1.24311e+06	39.5295	-320.983	3035.69	150.434	-7.071	0	2.52971	0	2.397	0.0536923	0
2000	1317	99.9983	1	1	286.015	-1.24326e+06	39.5265	-320.948	3035.55	150.433	-7.081	0	2.52991	0	2.402	0.0536854	0
2000	1316	99.9983	1	1	285.92	-1.24341e+06	39.5235	-320.914	3035.41	150.433	-7.09	0	2.5301	0	2.406	0.0536786	0
2000	1315	99.9983	1	1	285.826	-1.24356e+06	39.5205	-320.879	3035.27	150.433	-7.1	0	2.53029	0	2.41	0.0536717	0
2000	1314	99.9983	1	1	285.731	-1.24371e+06	39.5174	-320.844	3035.12	150.433	-7.11	0	2.53049	0	2.415	0.0536649	0
2000	1313	99.9984	1	1	285.636	-1.24386e+06	39.5144	-320.809	3034.98	150.433	-7.12	0	2.53068	0	2.419	0.053658	0
2000	1312	99.9984	1	1	285.542	-1.24401e+06	39.5114	-320.775	3034.84	150.432	-7.129	0	2.53087	0	2.423	0.0536512	0
2000	1311	99.9984	1	1	285.447	-1.24416e+06	39.5084	-320.74	3034.7	150.432	-7.139	0	2.53107	0	2.427	0.0536444	0
2000	1310	99.9984	1	1	285.352	-1.24431e+06	39.5054	-320.705	3034.55	150.432	-7.149	0	2.53126	0	2.432	0.0536376	0
2000	1309	99.9985	1	1	285.257	-1.24446e+06	39.5024	-320.671	3034.41	150.432	-7.159	0	2.53145	0	2.436	0.0536308	0
2000	1308	99.9985	1	1	285.162	-1.24462e+06	39.4994	-320.636	3034.26	150.432	-7.168	0	2.53165	0	2.44	0.053624	0
2000	1307	99.9985	1	1	285.067	-1.24477e+06	39.4963	-320.601	3034.12	150.431	-7.178	0	2.53184	0	2.445	0.0536173	0
2000	1306	99.9985	1	1	284.971	-1.24492e+06	39.4933	-320.567	3033.98	150.431	-7.188	0	2.53204	0	2.449	0.0536105	0
2000	1305	99.9986	1	1	284.876	-1.24507e+06	39.4903	-320.532	3033.83	150.431	-7.198	0	2.53223	0	2.453	0.0536037	0
2000	1304	99.9986	1	1	284.781	-1.24522e+06	39.4873	-320.498	3033.68	150.431	-7.208	0	2.53242	0	2.458	0.053597	0
2000	1303	99.9986	1	1	284.686	-1.24537e+06	39.4843	-320.463	3033.54	150.431	-7.217	0	2.53262	0	2.462	0.0535903	0
2000	1302	99.9986	1	1	284.59	-1.24552e+06	39.4813	-320.429	3033.39	150.43	-7.227	0	2.53281	0	2.466	0.0535836	0
2000	1301	99.9987	1	1	284.495	-1.24567e+06	39.4783	-320.394	3033.24	150.43	-7.237	0	2.53301	0	2.471	0.0535769	0
2000	1300	99.9987	1	1	284.399	-1.24582e+06	39.4753	-320.36	3033.1	150.43	-7.247	0	2.5332	0	2.475	0.0535702	0
2000	1299	99.9987	1	1	284.303	-1.24597e+06	39.4722	-320.325	3032.95	150.43	-7.257	0	2.53339	0	2.48	0.0535635	0
2000	1298	99.9987	1	1	284.208	-1.24612e+06	39.4692	-320.291	3032.8	150.43	-7.267	0	2.53359	0	2.484	0.0535568	0
2000	1297	99.9988	1	1	284.112	-1.24627e+06	39.4662	-320.256	3032.65	150.429	-7.277	0	2.53378	0	2.488	0.0535501	0
2000	1296	99.9988	1	1	284.016	-1.24643e+06	39.4632	-320.222	3032.5	150.429	-7.287	0	2.53397	0	2.493	0.0535435	0
2000	1295	99.9988	1	1	283.92	-1.24658e+06	39.4602	-320.187	3032.35	150.429	-7.296	0	2.53417	0	2.497	0.0535368	0
2000	1294	99.9988	1	1	283.825	-1.24673e+06	39.4572	-320.153	3032.2	150.429	-7.306	0	2.53436	0	2.502	0.0535302	0
2000	1293	99.9989	1	1	283.729	-1.24688e+06	39.4542	-320.118	3032.05	150.429	-7.316	0	2.53456	0	2.506	0.0535236	0
2000	1292	99.9989	1	1	283.633	-1.24703e+06	39.4512	-320.084	3031.9	150.428	-7.326	0	2.53475	0	2.51	0.053517	0
2000	1291	99.9989	1	1	283.536	-1.24718e+06	39.4482	-320.05	3031.75	150.428	-7.336	0	2.53495	0	2.515	0.0535104	0
2000	1290	99.9989	1	1	283.44	-1.24733e+06	39.4452	-320.015	3031.6	150.428	-7.346	0	2.53514	0	2.519	0.0535038	0
2000	1289	99.999	1	1	283.344	-1.24748e+06	39.4421	-319.981	3031.44	150.428	-7.356	0	2.53533	0	2.524	0.0534972	0
2000	1288	99.999	1	1	283.248	-1.24763e+06	39.4391	-319.947	3031.29	150.428	-7.366	0	2.53553	0	2.528	0.0534907	0
2000	1287	99.999	1	1	283.152	-1.24778e+06	39.4361	-319.913	3031.14	150.427	-7.376	0	2.53572	0	2.533	0.0534841	0
2000	1286	99.999	1	1	283.055	-1.24793e+06	39.4331	-319.878	3030.98	150.427	-7.386	0	2.53592	0	2.537	0.0534776	0
2000	1285	99.9991	1	1	282.959	-1.24808e+06	39.4301	-319.844	3030.83	150.427	-7.396	0	2.53611	0	2.541	0.0534711	0
2000	1284	99.9991	1	1	282.862	-1.24823e+06	39.4271	-319.81	3030.68	150.427	-7.407	0	2.5363	0	2.546	0.0534646	0
2000	1283	99.9991	1	1	282.766	-1.24839e+06	39.4241	-319.776	3030.52	150.427	-7.417	0	2.5365	0	2.55	0.0534581	0
2000	1282	99.9992	1	1	282.669	-1.24854e+06	39.4211	-319.741	3030.37	150.427	-7.427	0	2.53669	0	2.555	0.0534516	0
2000	1281	99.9992	1	1	282.572	-1.24869e+06	39.4181	-319.707	3030.21	150.426	-7.437	0	2.53689	0	2.559	0.0534451	0
2000	1280	99.9992	1	1	282.475	-1.24884e+06	39.4151	-319.673	3030.05	150.426	-7.447	0	2.53708	0	2.564	0.0534387	0
2000	1279	99.9992	1	1	282.379	-1.24899e+06	39.4121	-319.639	3029.9	150.426	-7.457	0	2.53727	0	2.568	0.0534322	0
2000	1278	99.9993	1	1	282.282	-1.24914e+06	39.4091	-319.605	3029.74	150.426	-7.467	0	2.53747	0	2.573	0.0534258	0
2000	1277	99.9993	1	1	282.185	-1.24929e+06	39.4061	-319.571	3029.58	150.426	-7.477	0	2.53766	0	2.577	0.0534193	0
2000	1276	99.9993	1	1	282.088	-1.24944e+06	39.4031	-319.537	3029.43	150.425	-7.488	0	2.53786	0	2.582	0.0534129	0
2000	1275	99.9994	1	1	281.991	-1.24959e+06	39.4001	-319.502	3029.27	150.425	-7.498	0	2.53805	0	2.586	0.0534065	0
2000	1274	99.9994	1	1	281.894	-1.24974e+06	39.3971	-319.468	3029.11	150.425	-7.508	0	2.53824	0	2.591	0.0534002	0
2000	1273	99.9994	1	1	281.796	-1.24989e+06	39.3941	-319.434	3028.95	150.425	-7.518	0	2.53844	0	2.595	0.0533938	0
2000	1272	99.9994	1	1	281.699	-1.25004e+06	39.391	-319.4	3028.79	150.425	-7.528	0	2.53863	0	2.6	0.0533874	0
2000	1271	99.9995	1	1	281.602	-1.2502e+06	39.388	-319.366	3028.63	150.425	-7.539	0	2.53883	0	2.604	0.0533811	0
2000	1270	99.9995	1	1	281.504	-1.25035e+06	39.385	-319.332	3028.47	150.424	-7.549	0	2.53902	0	2.609	0.0533747	0
2000	1269	99.9995	1	1	281.407	-1.2505e+06	39.382	-319.298	3028.31	150.424	-7.559	0	2.53922	0	2.613	0.0533684	0
2000	1268	99.9996	1	1	281.309	-1.25065e+06	39.379	-319.264	3028.15	150.424	-7.57	0	2.53941	0	2.618	0.0533621	0
2000	1267	99.9996	1	1	281.212	-1.2508e+06	39.376	-319.231	3027.99	150.424	-7.58	0	2.5396	0	2.623	0.0533558	0
2000	1266	99.9996	1	1	281.114	-1.25095e+06	39.373	-319.197	3027.82	150.424	-7.59	0	2.5398	0	2.627	0.0533495	0
2000	1265	99.9996	1	1	281.017	-1.2511e+06	39.37	-319.163	3027.66	150.424	-7.6	0	2.53999	0	2.632	0.0533433	0
2000	1264	99.9997	1	1	280.919	-1.25125e+06	39.367	-319.129	3027.5	150.423	-7.611	0	2.54019	0	2.636	0.053337	0
2000	1263	99.9997	1	1	280.821	-1.2514e+06	39.364	-319.095	3027.34	150.423	-7.621	0	2.54038	0	2.641	0.0533308	0
2000	1262	99.9997	1	1	280.723	-1.25155e+06	39.361	-319.061	3027.17	150.423	-7.632	0	2.54058	0	2.645	0.0533246	0
2000	1261	99.9998	1	1	280.625	-1.2517e+06	39.358	-319.027	3027.01	150.423	-7.642	0	2.54077	0	2.65	0.0533184	0
2000	1260	99.9998	1	1	280.527	-1.25185e+06	39.355	-318.993	3026.84	150.423	-7.652	0	2.54097	0	2.655	0.0533122	0
2000	1259	99.9998	1	1	280.429	-1.25201e+06	39.352	-318.96	3026.68	150.423	-7.663	0	2.54116	0	2.659	0.053306	0
2000	1258	99.9999	1	1	280.331	-1.25216e+06	39.349	-318.926	3026.51	150.422	-7.673	0	2.54135	0	2.664	0.0532998	0
2000	1257	99.9999	1	1	280.233	-1.25231e+06	39.346	-318.892	3026.35	150.422	-7.684	0	2.54155	0	2.668	0.0532937	0
2000	1256	99.9999	1	1	280.134	-1.25246e+06	39.343	-318.858	3026.18	150.422	-7.694	0	2.54174	0	2.673	0.0532875	0
2000	1255	100	1	1	280.036	-1.25261e+06	39.34	-318.825	3026.01	150.422	-7.704	0	2.54194	0	2.678	0.0532814	0
2000	1254	100	1	1	279.938	-1.25276e+06	39.337	-318.791	3025.85	150.422	-7.715	0	2.54213	0	2.682	0.0532753	0
2000	1253	100	1	1	279.839	-1.25291e+06	39.334	-318.757	3025.68	150.422	-7.725	0	2.54233	0	2.687	0.0532692	0
2000	1252	100	1	1	279.741	-1.25306e+06	39.331	-318.724	3025.51	150.421	-7.736	0	2.54252	0	2.692	0.0532631	0
2000	1251	100	1	1	279.642	-1.25321e+06	39.328	-318.69	3025.34	150.421	-7.746	0	2.54272	0	2.696	0.053257	0
2000	1250	100	1	1	279.543	-1.25336e+06	39.325	-318.656	3025.17	150.421	-7.757	0	2.54291	0	2.701	0.053251	0
2000	1249	100	1	1	279.445	-1.25351e+06	39.3221	-318.623	3025.01	150.421	-7.767	0	2.54311	0	2.706	0.0532449	0
2000	1248	100	1	1	279.346	-1.25367e+06	39.3191	-318.589	3024.84	150.421	-7.778	0	2.5433	0	2.71	0.0532389	0
2000	1247	100	1	1	279.247	-1.25382e+06	39.3161	-318.556	3024.67	150.421	-7.789	0	2.5435	0	2.715	0.0532329	0
2000	1246	100	1	1	279.148	-1.25397e+06	39.3131	-318.522	3024.5	150.421	-7.799	0	2.54369	0	2.72	0.0532269	0
2000	1245	100	1	1	279.049	-1.25412e+06	39.3101	-318.489	3024.32	150.42	-7.81	0	2.54388	0	2.724	0.053221	0
2000	1244	100	1	1	278.95	-1.25427e+06	39.3071	-318.455	3024.15	150.42	-7.82	0	2.54408	0	2.729	0.053215	0
2000	1243	100	1	1	278.851	-1.25442e+06	39.3041	-318.422	3023.98	150.42	-7.831	0	2.54427	0	2.734	0.053209	0
2000	1242	100	1	1	278.752	-1.25457e+06	39.3011	-318.388	3023.81	150.42	-7.842	0	2.54447	0	2.738	0.0532031	0
2000	1241	100	1	1	278.653	-1.25472e+06	39.2981	-318.355	3023.64	150.42	-7.852	0	2.54466	0	2.743	0.0531972	0
2000	1240	100	1	1	278.553	-1.25487e+06	39.2951	-318.321	3023.46	150.42	-7.863	0	2.54486	0	2.748	0.0531913	0
2000	1239	100.001	1	1	278.454	-1.25502e+06	39.2921	-318.288	3023.29	150.42	-7.874	0	2.54505	0	2.753	0.0531854	0
2000	1238	100.001	1	1	278.354	-1.25517e+06	39.2891	-318.254	3023.12	150.419	-7.884	0	2.54525	0	2.757	0.0531796	0
2000	1237	100.001	1	1	278.255	-1.25533e+06	39.2861	-318.221	3022.94	150.419	-7.895	0	2.54544	0	2.762	0.0531737	0
2000	1236	100.001	1	1	278.155	-1.25548e+06	39.2831	-318.188	3022.77	150.419	-7.906	0	2.54564	0	2.767	0.0531679	0
2000	1235	100.001	1	1	278.056	-1.25563e+06	39.2801	-318.154	3022.59	150.419	-7.917	0	2.54583	0	2.772	0.0531621	0
2000	1234	100.001	1	1	277.956	-1.25578e+06	39.2771	-318.121	3022.42	150.419	-7.927	0	2.54603	0	2.776	0.0531563	0
2000	1233	100.001	1	1	277.856	-1.25593e+06	39.2742	-318.088	3022.24	150.419	-7.938	0	2.54622	0	2.781	0.0531505	0
2000	1232	100.001	1	1	277.756	-1.25608e+06	39.2712	-318.054	3022.07	150.419	-7.949	0	2.54642	0	2.786	0.0531447	0
2000	1231	100.001	1	1	277.657	-1.25623e+06	39.2682	-318.021	3021.89	150.419	-7.96	0	2.54661	0	2.791	0.053139	0
2000	1230	100.001	1	1	277.557	-1.25638e+06	39.2652	-317.988	3021.71	150.418	-7.97	0	2.54681	0	2.796	0.0531332	0
2000	1229	100.001	1	1	277.457	-1.25653e+06	39.2622	-317.955	3021.54	150.418	-7.981	0	2.547	0	2.8	0.0531275	0
2000	1228	100.001	1	1	277.356	-1.25668e+06	39.2592	-317.921	3021.36	150.418	-7.992	0	2.5472	0	2.805	0.0531218	0
2000	1227	100.001	1	1	277.256	-1.25684e+06	39.2562	-317.888	3021.18	150.418	-8.003	0	2.54739	0	2.81	0.0531161	0
2000	1226	100.001	1	1	277.156	-1.25699e+06	39.2532	-317.855	3021	150.418	-8.014	0	2.54759	0	2.815	0.0531104	0
2000	1225	100.001	1	1	277.056	-1.25714e+06	39.2502	-317.822	3020.82	150.418	-8.025	0	2.54778	0	2.82	0.0531048	0
2000	1224	100.001	1	1	276.955	-1.25729e+06	39.2472	-317.789	3020.64	150.418	-8.036	0	2.54798	0	2.824	0.0530992	0
2000	1223	100.001	1	1	276.855	-1.25744e+06	39.2443	-317.755	3020.46	150.418	-8.047	0	2.54817	0	2.829	0.0530935	0
2000	1222	100.001	1	1	276.754	-1.25759e+06	39.2413	-317.722	3020.28	150.417	-8.057	0	2.54837	0	2.834	0.0530879	0
2000	1221	100.001	1	1	276.654	-1.25774e+06	39.2383	-317.689	3020.1	150.417	-8.068	0	2.54856	0	2.839	0.0530824	0
2000	1220	100.001	1	1	276.553	-1.25789e+06	39.2353	-317.656	3019.92	150.417	-8.079	0	2.54876	0	2.844	0.0530768	0
2000	1219	100.001	1	1	276.453	-1.25804e+06	39.2323	-317.623	3019.74	150.417	-8.09	0	2.54895	0	2.849	0.0530713	0
2000	1218	100.001	1	1	276.352	-1.25819e+06	39.2293	-317.59	3019.56	150.417	-8.101	0	2.54915	0	2.853	0.0530657	0
2000	1217	100.001	1	1	276.251	-1.25835e+06	39.2263	-317.557	3019.37	150.417	-8.112	0	2.54934	0	2.858	0.0530602	0
2000	1216	100.001	1	1	276.15	-1.2585e+06	39.2234	-317.524	3019.19	150.417	-8.123	0	2.54954	0	2.863	0.0530547	0
2000	1215	100.001	1	1	276.049	-1.25865e+06	39.2204	-317.491	3019.01	150.417	-8.134	0	2.54973	0	2.868	0.0530493	0
2000	1214	100.001	1	1	275.948	-1.2588e+06	39.2174	-317.458	3018.82	150.416	-8.145	0	2.54993	0	2.873	0.0530438	0
2000	1213	100.001	1	1	275.847	-1.25895e+06	39.2144	-317.425	3018.64	150.416	-8.156	0	2.55012	0	2.878	0.0530384	0
2000	1212	100.002	1	1	275.746	-1.2591e+06	39.2114	-317.392	3018.46	150.416	-8.168	0	2.55032	0	2.883	0.0530329	0
2000	1211	100.002	1	1	275.645	-1.25925e+06	39.2084	-317.36	3018.27	150.416	-8.179	0	2.55051	0	2.888	0.0530275	0
2000	1210	100.002	1	1	275.543	-1.2594e+06	39.2054	-317.327	3018.09	150.416	-8.19	0	2.55071	0	2.893	0.0530222	0
2000	1209	100.002	1	1	275.442	-1.25955e+06	39.2025	-317.294	3017.9	150.416	-8.201	0	2.5509	0	2.897	0.0530168	0
2000	1208	100.002	1	1	275.34	-1.2597e+06	39.1995	-317.261	3017.71	150.416	-8.212	0	2.5511	0	2.902	0.0530115	0
2000	1207	100.002	1	1	275.239	-1.25986e+06	39.1965	-317.228	3017.53	150.416	-8.223	0	2.55129	0	2.907	0.0530061	0
2000	1206	100.002	1	1	275.14	-1.26e+06	39.1935	-317.195	3017.34	145.799	-8.234	0	2.55149	0	2.912	0.0530008	0
2000	1205	100.002	1	1	275.041	-1.26015e+06	39.1905	-317.163	3017.15	145.798	-8.245	0	2.55168	0	2.917	0.0529955	0
2000	1204	100.002	1	1	274.943	-1.2603e+06	39.1876	-317.13	3016.96	145.797	-8.257	0	2.55188	0	2.922	0.0529903	0
2000	1203	100.002	1	1	274.844	-1.26044e+06	39.1846	-317.097	3016.78	145.796	-8.268	0	2.55207	0	2.927	0.052985	0
2000	1202	100.002	1	1	274.745	-1.26059e+06	39.1816	-317.064	3016.59	145.794	-8.279	0	2.55227	0	2.932	0.0529798	0
2000	1201	100.002	1	1	274.647	-1.26073e+06	39.1786	-317.032	3016.4	145.793	-8.29	0	2.55246	0	2.937	0.0529746	0
2000	1200	100.002	1	1	274.548	-1.26088e+06	39.1756	-316.999	3016.21	145.792	-8.302	0	2.55266	0	2.942	0.0529694	0
2000	1199	100.002	1	1	274.449	-1.26103e+06	39.1727	-316.966	3016.02	145.791	-8.313	0	2.55285	0	2.947	0.0529642	0
2000	1198	100.002	1	1	274.35	-1.26117e+06	39.1697	-316.934	3015.83	145.79	-8.324	0	2.55305	0	2.952	0.0529591	0
2000	1197	100.002	1	1	274.251	-1.26132e+06	39.1667	-316.901	3015.64	145.788	-8.335	0	2.55324	0	2.957	0.052954	0
2000	1196	100.002	1	1	274.152	-1.26147e+06	39.1637	-316.869	3015.45	145.787	-8.347	0	2.55344	0	2.962	0.0529489	0
2000	1195	100.002	1	1	274.053	-1.26161e+06	39.1607	-316.836	3015.26	145.786	-8.358	0	2.55363	0	2.967	0.0529438	0
2000	1194	100.002	1	1	273.953	-1.26176e+06	39.1578	-316.804	3015.06	145.785	-8.369	0	2.55383	0	2.972	0.0529387	0
2000	1193	100.002	1	1	273.854	-1.26191e+06	39.1548	-316.771	3014.87	145.783	-8.381	0	2.55403	0	2.977	0.0529337	0
2000	1192	100.002	1	1	273.755	-1.26205e+06	39.1518	-316.738	3014.68	145.782	-8.392	0	2.55422	0	2.982	0.0529286	0
2000	1191	100.002	0.997903	0.998333	273.603	-1.26227e+06	39.1386	-316.429	3011.87	145.709	-8.404	0	2.55398	3.21427	2.991	0.0530369	0
2000	1190	99.7935	0.998663	0.998937	272.964	-1.25979e+06	39.0643	-316.171	3007.28	145.397	-8.415	0	2.5539	3.2148	2.999	0.0531036	0
2000	1189	99.661	0.998666	0.99894	272.51	-1.25829e+06	39.0137	-315.932	3003.69	145.182	-8.426	0	2.55381	3.21534	3.007	0.0531701	0
2000	1188	99.529	0.998669	0.998943	272.058	-1.25679e+06	38.9633	-315.695	3000.12	144.968	-8.438	0	2.55373	3.21587	3.015	0.0532364	0
2000	1187	99.3973	0.992726	0.99349	271.473	-1.25549e+06	38.8994	-314.435	2989.2	144.601	-8.449	0	2.55327	2.85506	3.022	0.0538723	0
2000	1186	98.676	0.988133	0.989272	269.35	-1.24638e+06	38.6137	-312.129	2966.82	143.388	-8.461	0	2.55252	2.82696	3.028	0.0549662	0
2000	1185	97.5067	0.988276	0.989405	266.141	-1.2312e+06	38.1678	-309.662	2940.31	141.626	-8.472	0	2.55177	2.82695	3.035	0.0560668	0
2000	1184	96.3652	0.988415	0.989534	263.008	-1.21639e+06	37.7324	-307.25	2914.42	139.907	-8.484	0	2.55102	2.82694	3.041	0.0571739	0
2000	1183	95.2505	0.988552	0.98966	259.949	-1.20194e+06	37.3072	-304.891	2889.14	138.228	-8.495	0	2.55028	2.82694	3.048	0.0582875	0
2000	1182	94.1618	0.988685	0.989784	256.96	-1.18782e+06	36.8918	-302.584	2864.44	136.589	-8.507	0	2.54954	2.82693	3.054	0.0594075	0
2000	1181	93.098	0.988815	0.989904	254.04	-1.17403e+06	36.486	-300.327	2840.3	134.988	-8.518	0	2.5488	2.82693	3.06	0.0605337	0
2000	1180	92.0585	0.988943	0.990022	251.186	-1.16055e+06	36.0893	-298.117	2816.7	133.423	-8.53	0	2.54807	2.82693	3.067	0.0616661	0
2000	1179	91.0423	0.989067	0.990138	248.396	-1.14738e+06	35.7015	-295.954	2793.64	131.894	-8.542	0	2.54734	2.82694	3.073	0.0628045	0
2000	1178	90.0486	0.989189	0.990251	245.668	-1.13451e+06	35.3223	-293.836	2771.07	130.399	-8.553	0	2.54661	2.82694	3.079	0.0639489	0
2000	1177	89.0768	0.989308	0.990361	242.999	-1.12192e+06	34.9514	-291.762	2749	128.937	-8.565	0	2.54588	2.82695	3.085	0.0650991	0
2000	1176	88.1262	0.989425	0.990469	240.388	-1.1096e+06	34.5885	-289.73	2727.41	127.507	-8.576	0	2.54516	2.82696	3.092	0.0662551	0
2000	1175	87.196	0.987544	0.989152	237.771	-1.09765e+06	34.2213	-287.639	2704.54	126.031	-8.588	0	2.54386	2.92577	3.102	0.0675575	0
2000	1174	86.1126	0.988477	0.989845	234.848	-1.08377e+06	33.8185	-285.612	2680.15	124.424	-8.6	0	2.5428	2.88937	3.111	0.0688097	0
2000	1173	85.1231	0.988623	0.989976	232.147	-1.07106e+06	33.4443	-283.638	2657.41	122.933	-8.611	0	2.54174	2.88885	3.12	0.0700669	0
2000	1172	84.1575	0.988766	0.990104	229.51	-1.05867e+06	33.079	-281.708	2635.22	121.478	-8.623	0	2.54069	2.88833	3.128	0.0713289	0
2000	1171	83.2148	0.988905	0.990229	226.936	-1.04657e+06	32.7224	-279.82	2613.55	120.058	-8.635	0	2.53965	2.88781	3.137	0.0725957	0
2000	1170	82.2942	0.98904	0.990351	224.422	-1.03476e+06	32.374	-277.973	2592.38	118.672	-8.646	0	2.53862	2.88728	3.145	0.0738671	0
2000	1169	81.3951	0.989173	0.99047	221.965	-1.02322e+06	32.0337	-276.164	2571.71	117.318	-8.658	0	2.53759	2.88675	3.154	0.0751431	0
2000	1168	80.5166	0.989302	0.990586	219.565	-1.01195e+06	31.7011	-274.393	2551.5	115.996	-8.67	0	2.53657	2.88622	3.162	0.0764236	0
2000	1167	79.658	0.989429	0.990699	217.219	-1.00094e+06	31.3761	-272.659	2531.76	114.704	-8.682	0	2.53556	2.88569	3.171	0.0777086	0
2000	1166	78.8187	0.989552	0.99081	214.925	-990173	31.0582	-270.96	2512.45	113.441	-8.694	0	2.53455	2.88515	3.179	0.0789979	0
2000	1165	77.9979	0.989673	0.990918	212.682	-979649	30.7473	-269.294	2493.56	112.206	-8.705	0	2.53355	2.88461	3.187	0.0802914	0
2000	1164	77.1952	0.989511	0.990796	210.485	-969361	30.4427	-267.628	2474.77	110.994	-8.717	0	2.53247	2.88991	3.196	0.081621	0
2000	1163	76.3882	0.989559	0.990838	208.281	-959062	30.1376	-265.977	2456.12	109.782	-8.729	0	2.53138	2.88841	3.204	0.0829647	0
2000	1162	75.5933	0.989678	0.990945	206.111	-948917	29.8371	-264.356	2437.82	108.59	-8.741	0	2.5303	2.88788	3.213	0.0843128	0
2000	1161	74.8158	0.989795	0.991049	203.988	-938995	29.5431	-262.767	2419.92	107.424	-8.753	0	2.52923	2.88736	3.221	0.0856652	0
2000	1160	74.0551	0.989909	0.991152	201.91	-929289	29.2554	-261.209	2402.4	106.283	-8.765	0	2.52816	2.88683	3.229	0.0870217	0
2000	1159	73.3106	0.990021	0.991252	199.877	-919791	28.9737	-259.681	2385.25	105.168	-8.777	0	2.5271	2.8863	3.238	0.0883824	0
2000	1158	72.5817	0.99013	0.99135	197.886	-910495	28.698	-258.181	2368.46	104.075	-8.789	0	2.52605	2.88577	3.246	0.0897471	0
2000	1157	71.8681	0.990237	0.991445	195.936	-901393	28.4279	-256.71	2352.02	103.007	-8.8	0	2.525	2.88524	3.254	0.0911158	0
2000	1156	71.1692	0.990341	0.991539	194.026	-892481	28.1634	-255.266	2335.92	101.96	-8.812	0	2.52396	2.8847	3.262	0.0924885	0
2000	1155	70.4846	0.990444	0.99163	192.155	-883753	27.9042	-253.848	2320.14	100.935	-8.824	0	2.52293	2.88416	3.27	0.093865	0
2000	1154	69.8137	0.990544	0.99172	190.321	-875201	27.6502	-252.456	2304.67	99.9308	-8.836	0	2.5219	2.88362	3.278	0.0952453	0
2000	1153	69.1564	0.990642	0.991808	188.524	-866822	27.4012	-251.089	2289.52	98.947	-8.848	0	2.52088	2.88308	3.286	0.0966293	0
2000	1152	68.512	0.990738	0.991894	186.762	-858610	27.157	-249.745	2274.66	97.983	-8.86	0	2.51987	2.88254	3.294	0.098017	0
2000	1151	67.8802	0.990832	0.991978	185.034	-850560	26.9177	-248.425	2260.09	97.0381	-8.872	0	2.51886	2.88199	3.302	0.0994084	0
2000	1150	67.2607	0.990924	0.99206	183.34	-842667	26.6829	-247.128	2245.8	96.1117	-8.885	0	2.51786	2.88145	3.31	0.100803	0
2000	1149	66.653	0.991015	0.992141	181.678	-834927	26.4525	-245.852	2231.78	95.2034	-8.897	0	2.51686	2.8809	3.317	0.102202	0
2000	1148	66.0569	0.991103	0.99222	180.047	-827334	26.2265	-244.599	2218.02	94.3125	-8.909	0	2.51587	2.88035	3.325	0.103604	0
2000	1147	65.472	0.99119	0.992298	178.446	-819886	26.0047	-243.365	2204.52	93.4386	-8.921	0	2.51489	2.8798	3.333	0.105009	0
2000	1146	64.898	0.991275	0.992374	176.875	-812577	25.787	-242.152	2191.27	92.5812	-8.933	0	2.51391	2.87925	3.34	0.106417	0
2000	1145	64.3346	0.991358	0.992448	175.333	-805404	25.5732	-240.959	2178.26	91.7398	-8.945	0	2.51294	2.8787	3.348	0.107829	0
2000	1144	63.7814	0.99144	0.992521	173.818	-798363	25.3633	-239.785	2165.48	90.914	-8.957	0	2.51198	2.87815	3.355	0.109244	0
2000	1143	63.2383	0.99152	0.992593	172.331	-791450	25.1571	-238.629	2152.94	90.1033	-8.969	0	2.51102	2.87759	3.363	0.110663	0
2000	1142	62.7049	0.991599	0.992663	170.87	-784661	24.9546	-237.492	2140.62	89.3074	-8.982	0	2.51006	2.87704	3.37	0.112084	0
2000	1141	62.1809	0.991676	0.992732	169.435	-777994	24.7556	-236.372	2128.51	88.5257	-8.994	0	2.50912	2.87649	3.377	0.113509	0
2000	1140	61.6661	0.991752	0.992799	168.025	-771445	24.5601	-235.269	2116.61	87.758	-9.006	0	2.50818	2.87593	3.385	0.114937	0
2000	1139	61.1604	0.991826	0.992865	166.639	-765011	24.368	-234.183	2104.92	87.0039	-9.018	0	2.50724	2.87537	3.392	0.116368	0
2000	1138	60.6633	0.991899	0.99293	165.277	-758689	24.1791	-233.113	2093.42	86.263	-9.031	0	2.50631	2.87482	3.399	0.117802	0
2000	1137	60.1747	0.991971	0.992994	163.938	-752475	23.9934	-232.059	2082.13	85.5349	-9.043	0	2.50539	2.87426	3.406	0.119238	0
2000	1136	59.6944	0.992041	0.993057	162.621	-746368	23.8108	-231.021	2071.01	84.8193	-9.055	0	2.50447	2.8737	3.414	0.120678	0
2000	1135	59.2221	0.99211	0.993118	161.326	-740364	23.6312	-229.998	2060.09	84.1159	-9.067	0	2.50355	2.87315	3.421	0.122121	0
2000	1134	58.7577	0.992178	0.993178	160.053	-734460	23.4546	-228.989	2049.34	83.4244	-9.08	0	2.50265	2.87259	3.428	0.123566	0
2000	1133	58.3009	0.992245	0.993238	158.8	-728654	23.2808	-227.994	2038.77	82.7444	-9.092	0	2.50174	2.87203	3.435	0.125014	0
2000	1132	57.8516	0.99231	0.993296	157.568	-722944	23.1098	-227.014	2028.37	82.0757	-9.105	0	2.50085	2.87147	3.442	0.126466	0
2000	1131	57.4096	0.992374	0.993353	156.355	-717327	22.9416	-226.047	2018.13	81.418	-9.117	0	2.49996	2.87092	3.448	0.127919	0
2000	1130	56.9746	0.992437	0.993409	155.161	-711800	22.776	-225.093	2008.05	80.771	-9.129	0	2.49907	2.87036	3.455	0.129376	0
2000	1129	56.5466	0.992499	0.993464	153.987	-706362	22.613	-224.152	1998.14	80.1345	-9.142	0	2.49819	2.8698	3.462	0.130835	0
2000	1128	56.1253	0.99256	0.993518	152.831	-701011	22.4526	-223.224	1988.37	79.5082	-9.154	0	2.49731	2.86925	3.469	0.132297	0
2000	1127	55.7106	0.99262	0.993571	151.692	-695744	22.2946	-222.309	1978.76	78.8918	-9.167	0	2.49644	2.86869	3.476	0.133762	0
2000	1126	55.3023	0.992679	0.993624	150.571	-690559	22.139	-221.405	1969.3	78.2851	-9.179	0	2.49558	2.86813	3.482	0.135229	0
2000	1125	54.9002	0.992737	0.993675	149.467	-685454	21.9858	-220.513	1959.97	77.6879	-9.192	0	2.49472	2.86758	3.489	0.136699	0
2000	1124	54.5043	0.992794	0.993726	148.38	-680428	21.8349	-219.633	1950.79	77.1	-9.204	0	2.49386	2.86702	3.495	0.138171	0
2000	1123	54.1144	0.992849	0.993775	147.309	-675478	21.6862	-218.764	1941.74	76.5211	-9.217	0	2.49301	2.86647	3.502	0.139646	0
2000	1122	53.7303	0.992904	0.993824	146.254	-670603	21.5397	-217.906	1932.83	75.951	-9.229	0	2.49217	2.86592	3.508	0.141123	0
2000	1121	53.3519	0.992959	0.993872	145.214	-665801	21.3954	-217.058	1924.05	75.3895	-9.242	0	2.49133	2.86536	3.515	0.142603	0
2000	1120	52.9791	0.993012	0.993919	144.19	-661070	21.2531	-216.222	1915.39	74.8364	-9.254	0	2.49049	2.86481	3.521	0.144085	0
2000	1119	52.6117	0.993064	0.993966	143.18	-656409	21.1129	-215.395	1906.86	74.2915	-9.267	0	2.48966	2.86426	3.528	0.14557	0
2000	1118	52.2497	0.993115	0.994011	142.185	-651816	20.9747	-214.578	1898.44	73.7547	-9.28	0	2.48884	2.86371	3.534	0.147057	0
2000	1117	51.8929	0.993166	0.994056	141.204	-647290	20.8384	-213.772	1890.15	73.2258	-9.292	0	2.48802	2.86316	3.54	0.148546	0
2000	1116	51.5411	0.993216	0.9941	140.236	-642828	20.7041	-212.974	1881.98	72.7045	-9.305	0	2.4872	2.86262	3.547	0.150038	0
2000	1115	51.1943	0.993265	0.994144	139.283	-638430	20.5716	-212.187	1873.91	72.1907	-9.318	0	2.48639	2.86207	3.553	0.151532	0
2000	1114	50.8524	0.993313	0.994187	138.342	-634095	20.441	-211.408	1865.96	71.6843	-9.33	0	2.48558	2.86153	3.559	0.153029	0
2000	1113	50.5152	0.993361	0.994229	137.415	-629820	20.3121	-210.639	1858.12	71.185	-9.343	0	2.48478	2.86098	3.565	0.154528	0
2000	1112	50.1827	0.993407	0.99427	136.5	-625605	20.185	-209.878	1850.38	70.6928	-9.356	0	2.48398	2.86044	3.571	0.156029	0
2000	1111	49.8547	0.993453	0.994311	135.597	-621448	20.0596	-209.126	1842.74	70.2074	-9.368	0	2.48319	2.8599	3.577	0.157532	0
2000	1110	49.5312	0.993499	0.994351	134.707	-617348	19.9358	-208.382	1835.21	69.7288	-9.381	0	2.4824	2.85936	3.583	0.159037	0
2000	1109	49.2121	0.993543	0.99439	133.829	-613304	19.8138	-207.647	1827.78	69.2567	-9.394	0	2.48162	2.85883	3.589	0.160545	0
2000	1108	48.8972	0.993587	0.994429	132.962	-609315	19.6933	-206.919	1820.44	68.7911	-9.407	0	2.48084	2.85829	3.595	0.162055	0
2000	1107	48.5865	0.99363	0.994468	132.106	-605378	19.5744	-206.2	1813.2	68.3318	-9.42	0	2.48006	2.85776	3.601	0.163567	0
2000	1106	48.2799	0.993673	0.994505	131.262	-601495	19.457	-205.488	1806.05	67.8786	-9.432	0	2.47929	2.85723	3.607	0.165082	0
2000	1105	47.9773	0.993715	0.994542	130.429	-597662	19.3411	-204.784	1799	67.4315	-9.445	0	2.47852	2.8567	3.613	0.166598	0
2000	1104	47.6787	0.993756	0.994579	129.606	-593880	19.2267	-204.088	1792.03	66.9904	-9.458	0	2.47776	2.85617	3.618	0.168117	0
2000	1103	47.3839	0.993797	0.994615	128.794	-590147	19.1138	-203.399	1785.15	66.555	-9.471	0	2.47701	2.85564	3.624	0.169637	0
2000	1102	47.0929	0.993837	0.994651	127.992	-586462	19.0023	-202.717	1778.35	66.1253	-9.484	0	2.47625	2.85512	3.63	0.17116	0
2000	1101	46.8055	0.993877	0.994685	127.2	-582825	18.8921	-202.042	1771.64	65.7012	-9.497	0	2.4755	2.8546	3.635	0.172685	0
2000	1100	46.5218	0.993916	0.99472	126.418	-579233	18.7833	-201.374	1765.02	65.2825	-9.51	0	2.47476	2.85408	3.641	0.174212	0
2000	1099	46.2416	0.993954	0.994754	125.646	-575687	18.6759	-200.712	1758.47	64.8692	-9.523	0	2.47401	2.85356	3.647	0.175741	0
2000	1098	45.9649	0.993992	0.994787	124.883	-572186	18.5698	-200.058	1752	64.4611	-9.536	0	2.47328	2.85305	3.652	0.177272	0
2000	1097	45.6917	0.994029	0.99482	124.13	-568728	18.4649	-199.41	1745.61	64.0582	-9.549	0	2.47254	2.85254	3.658	0.178805	0
2000	1096	45.4217	0.994066	0.994853	123.385	-565313	18.3613	-198.768	1739.3	63.6603	-9.562	0	2.47181	2.85203	3.663	0.18034	0
2000	1095	45.1551	0.994102	0.994885	122.65	-561940	18.259	-198.133	1733.06	63.2674	-9.575	0	2.47109	2.85152	3.669	0.181877	0
2000	1094	44.8916	0.994138	0.994916	121.923	-558608	18.1578	-197.503	1726.89	62.8793	-9.588	0	2.47037	2.85102	3.674	0.183416	0
2000	1093	44.6314	0.994173	0.994947	121.205	-555316	18.0579	-196.88	1720.8	62.4959	-9.601	0	2.46965	2.85052	3.679	0.184957	0
2000	1092	44.3742	0.994207	0.994978	120.495	-552064	17.9591	-196.263	1714.77	62.1172	-9.614	0	2.46894	2.85002	3.685	0.1865	0
2000	1091	44.1201	0.994242	0.995008	119.794	-548850	17.8614	-195.651	1708.82	61.7431	-9.627	0	2.46822	2.84952	3.69	0.188045	0
2000	1090	43.8689	0.994275	0.995038	119.101	-545675	17.7649	-195.046	1702.93	61.3735	-9.64	0	2.46752	2.84903	3.695	0.189592	0
2000	1089	43.6207	0.994309	0.995068	118.416	-542537	17.6695	-194.445	1697.11	61.0083	-9.654	0	2.46682	2.84854	3.7	0.19114	0
2000	1088	43.3753	0.994341	0.995097	117.738	-539436	17.5752	-193.851	1691.35	60.6474	-9.667	0	2.46612	2.84806	3.705	0.192691	0
2000	1087	43.1328	0.994374	0.995125	117.069	-536371	17.4819	-193.262	1685.66	60.2907	-9.68	0	2.46542	2.84757	3.711	0.194243	0
2000	1086	42.893	0.994406	0.995153	116.407	-533341	17.3896	-192.678	1680.03	59.9382	-9.693	0	2.46473	2.84709	3.716	0.195798	0
2000	1085	42.656	0.994437	0.995181	115.752	-530346	17.2984	-192.099	1674.46	59.5898	-9.706	0	2.46404	2.84661	3.721	0.197354	0
2000	1084	42.4216	0.994468	0.995209	115.104	-527385	17.2082	-191.526	1668.95	59.2454	-9.72	0	2.46336	2.84614	3.726	0.198912	0
2000	1083	42.1898	0.994499	0.995236	114.464	-524458	17.119	-190.957	1663.5	58.905	-9.733	0	2.46268	2.84567	3.731	0.200472	0
2000	1082	41.9606	0.994529	0.995263	113.831	-521563	17.0308	-190.394	1658.11	58.5684	-9.746	0	2.462	2.8452	3.736	0.202034	0
2000	1081	41.734	0.994559	0.995289	113.205	-518701	16.9435	-189.835	1652.78	58.2356	-9.76	0	2.46132	2.84474	3.741	0.203597	0
2000	1080	41.5098	0.994588	0.995315	112.585	-515871	16.8571	-189.282	1647.51	57.9066	-9.773	0	2.46065	2.84428	3.746	0.205163	0
2000	1079	41.2881	0.994617	0.995341	111.972	-513071	16.7717	-188.732	1642.28	57.5812	-9.786	0	2.45999	2.84382	3.75	0.20673	0
2000	1078	41.0688	0.994646	0.995366	111.366	-510303	16.6872	-188.188	1637.12	57.2595	-9.8	0	2.45932	2.84337	3.755	0.208299	0
2000	1077	40.8518	0.994674	0.995391	110.766	-507564	16.6035	-187.648	1632	56.9413	-9.813	0	2.45866	2.84292	3.76	0.209869	0
2000	1076	40.6372	0.994702	0.995416	110.173	-504855	16.5207	-187.113	1626.94	56.6266	-9.827	0	2.458	2.84247	3.765	0.211442	0
2000	1075	40.4248	0.99473	0.99544	109.585	-502175	16.4388	-186.582	1621.93	56.3153	-9.84	0	2.45735	2.84203	3.77	0.213016	0
2000	1074	40.2147	0.994757	0.995464	109.004	-499524	16.3578	-186.055	1616.98	56.0073	-9.853	0	2.4567	2.84159	3.774	0.214592	0
2000	1073	40.0068	0.994784	0.995488	108.429	-496901	16.2775	-185.533	1612.07	55.7027	-9.867	0	2.45605	2.84116	3.779	0.21617	0
2000	1072	39.801	0.99481	0.995511	107.86	-494306	16.1981	-185.015	1607.21	55.4013	-9.88	0	2.45541	2.84073	3.784	0.217749	0
2000	1071	39.5974	0.994837	0.995534	107.297	-491738	16.1195	-184.501	1602.39	55.1031	-9.894	0	2.45477	2.8403	3.788	0.21933	0
2000	1070	39.3958	0.994863	0.995557	106.739	-489196	16.0417	-183.991	1597.63	54.8081	-9.907	0	2.45413	2.83988	3.793	0.220913	0
2000	1069	39.1964	0.994888	0.99558	106.187	-486681	15.9646	-183.485	1592.91	54.5161	-9.921	0	2.45349	2.83947	3.797	0.222497	0
2000	1068	38.9989	0.994913	0.995602	105.64	-484191	15.8884	-182.983	1588.24	54.2272	-9.935	0	2.45286	2.83905	3.802	0.224083	0
2000	1067	38.8035	0.994938	0.995624	105.099	-481728	15.8128	-182.485	1583.61	53.9413	-9.948	0	2.45223	2.83865	3.806	0.225671	0
2000	1066	38.61	0.994963	0.995646	104.564	-479289	15.738	-181.991	1579.03	53.6583	-9.962	0	2.4516	2.83824	3.811	0.227261	0
2000	1065	38.4184	0.994987	0.995667	104.033	-476875	15.664	-181.501	1574.49	53.3783	-9.975	0	2.45098	2.83784	3.815	0.228852	0
2000	1064	38.2287	0.995011	0.995689	103.508	-474485	15.5906	-181.014	1569.99	53.101	-9.989	0	2.45036	2.83745	3.819	0.230444	0
2000	1063	38.0409	0.995035	0.99571	102.988	-472118	15.518	-180.531	1565.53	52.8266	-10.003	0	2.44974	2.83705	3.824	0.232039	0
2000	1062	37.855	0.995058	0.99573	102.473	-469776	15.4461	-180.051	1561.12	52.5549	-10.016	0	2.44913	2.83667	3.828	0.233635	0
2000	1061	37.6708	0.995081	0.995751	101.963	-467456	15.3748	-179.575	1556.75	52.286	-10.03	0	2.44852	2.83629	3.832	0.235232	0
2000	1060	37.4884	0.995104	0.995771	101.457	-465159	15.3042	-179.103	1552.41	52.0197	-10.044	0	2.44791	2.83591	3.837	0.236832	0
2000	1059	37.3078	0.995126	0.995791	100.957	-462885	15.2343	-178.634	1548.12	51.756	-10.058	0	2.4473	2.83554	3.841	0.238432	0
2000	1058	37.1289	0.995149	0.995811	100.461	-460633	15.165	-178.168	1543.86	51.4949	-10.071	0	2.4467	2.83517	3.845	0.240035	0
2000	1057	36.9517	0.995171	0.99583	99.9702	-458402	15.0964	-177.706	1539.65	51.2364	-10.085	0	2.4461	2.83481	3.849	0.241639	0
2000	1056	36.7762	0.995186	0.995846	99.4836	-456193	15.0284	-177.247	1535.46	50.9803	-10.099	0	2.4455	2.83553	3.853	0.243246	0
2000	1055	36.6023	0.995187	0.995852	99.0013	-454004	14.961	-176.79	1531.29	50.7263	-10.113	0	2.44488	2.83921	3.858	0.24486	0
2000	1054	36.4298	0.995192	0.995863	98.523	-451834	14.8941	-176.337	1527.16	50.4745	-10.127	0	2.44427	2.84272	3.862	0.246476	0
2000	1053	36.2585	0.995205	0.995877	98.0484	-449682	14.8278	-175.886	1523.06	50.2249	-10.141	0	2.44366	2.84423	3.866	0.248093	0
2000	1052	36.0886	0.995225	0.995896	97.5776	-447549	14.762	-175.439	1518.99	49.9773	-10.155	0	2.44305	2.844	3.87	0.249712	0
2000	1051	35.9202	0.995245	0.995914	97.111	-445435	14.6968	-174.995	1514.96	49.7321	-10.169	0	2.44244	2.84379	3.874	0.251332	0
2000	1050	35.7534	0.995265	0.995931	96.6486	-443341	14.6322	-174.554	1510.96	49.4891	-10.183	0	2.44184	2.84358	3.878	0.252955	0
2000	1049	35.5881	0.995285	0.995949	96.1904	-441266	14.5682	-174.116	1506.99	49.2484	-10.196	0	2.44124	2.84338	3.882	0.254578	0
2000	1048	35.4242	0.995304	0.995966	95.7362	-439211	14.5047	-173.681	1503.06	49.01	-10.21	0	2.44064	2.84319	3.886	0.256204	0
2000	1047	35.2618	0.995323	0.995984	95.286	-437174	14.4417	-173.248	1499.16	48.7737	-10.224	0	2.44004	2.84301	3.89	0.257831	0
2000	1046	35.1009	0.995342	0.996001	94.8398	-435155	14.3794	-172.819	1495.29	48.5396	-10.239	0	2.43945	2.84283	3.894	0.259459	0
2000	1045	34.9413	0.995361	0.996017	94.3975	-433154	14.3175	-172.392	1491.46	48.3076	-10.253	0	2.43885	2.84267	3.898	0.26109	0
2000	1044	34.7832	0.995379	0.996034	93.959	-431172	14.2562	-171.969	1487.65	48.0776	-10.267	0	2.43826	2.84252	3.902	0.262721	0
2000	1043	34.6264	0.995398	0.99605	93.5242	-429207	14.1954	-171.547	1483.88	47.8498	-10.281	0	2.43767	2.84237	3.906	0.264355	0
2000	1042	34.471	0.995416	0.996066	93.0932	-427259	14.1351	-171.129	1480.14	47.624	-10.295	0	2.43708	2.84224	3.91	0.26599	0
2000	1041	34.3169	0.995433	0.996082	92.6659	-425329	14.0754	-170.713	1476.42	47.4001	-10.309	0	2.4365	2.84211	3.914	0.267626	0
2000	1040	34.1642	0.995451	0.996098	92.2422	-423415	14.0161	-170.3	1472.74	47.1783	-10.323	0	2.43591	2.842	3.918	0.269264	0
2000	1039	34.0127	0.995468	0.996114	91.822	-421518	13.9573	-169.89	1469.08	46.9584	-10.337	0	2.43533	2.8419	3.921	0.270904	0
2000	1038	33.8625	0.995485	0.996129	91.4053	-419638	13.899	-169.482	1465.45	46.7404	-10.352	0	2.43475	2.84181	3.925	0.272545	0
2000	1037	33.7136	0.995502	0.996144	90.9921	-417773	13.8412	-169.077	1461.85	46.5243	-10.366	0	2.43417	2.84173	3.929	0.274188	0
2000	1036	33.5659	0.995518	0.996159	90.5823	-415925	13.7839	-168.674	1458.28	46.31	-10.38	0	2.43359	2.84166	3.933	0.275832	0
2000	1035	33.4194	0.995535	0.996174	90.1759	-414092	13.727	-168.273	1454.73	46.0975	-10.394	0	2.43302	2.8416	3.936	0.277478	0
2000	1034	33.2742	0.995551	0.996189	89.7728	-412275	13.6706	-167.875	1451.22	45.8869	-10.409	0	2.43244	2.84156	3.94	0.279126	0
2000	1033	33.1301	0.995567	0.996203	89.3729	-410473	13.6146	-167.48	1447.72	45.678	-10.423	0	2.43187	2.84153	3.944	0.280775	0
2000	1032	32.9871	0.995582	0.996218	88.9762	-408686	13.5591	-167.087	1444.25	45.4709	-10.437	0	2.43129	2.84151	3.947	0.282426	0
2000	1031	32.8454	0.995598	0.996232	88.5827	-406914	13.504	-166.696	1440.81	45.2655	-10.452	0	2.43072	2.84151	3.951	0.284078	0
2000	1030	32.7048	0.995613	0.996246	88.1924	-405156	13.4494	-166.307	1437.4	45.0618	-10.466	0	2.43015	2.84152	3.955	0.285732	0
2000	1029	32.5652	0.995628	0.996259	87.8051	-403413	13.3951	-165.921	1434	44.8598	-10.48	0	2.42958	2.84154	3.958	0.287387	0
2000	1028	32.4268	0.995643	0.996273	87.4209	-401684	13.3413	-165.537	1430.63	44.6595	-10.495	0	2.42902	2.84158	3.962	0.289044	0
2000	1027	32.2895	0.995657	0.996286	87.0396	-399969	13.2879	-165.155	1427.29	44.4607	-10.509	0	2.42845	2.84164	3.965	0.290703	0
2000	1026	32.1532	0.995671	0.996299	86.6613	-398268	13.235	-164.775	1423.97	44.2636	-10.524	0	2.42788	2.8417	3.969	0.292363	0
2000	1025	32.018	0.995686	0.996313	86.2859	-396580	13.1824	-164.398	1420.67	44.068	-10.538	0	2.42732	2.84179	3.972	0.294025	0
2000	1024	31.8839	0.995699	0.996325	85.9134	-394906	13.1302	-164.022	1417.39	43.874	-10.553	0	2.42675	2.84189	3.976	0.295689	0
2000	1023	31.7507	0.995713	0.996338	85.5437	-393246	13.0785	-163.649	1414.16	43.6823	-10.567	0	2.42619	2.842	3.979	0.297354	0
2000	1022	31.6186	0.995726	0.99635	85.1767	-391598	13.0271	-163.278	1410.93	43.4913	-10.582	0	2.42563	2.84213	3.983	0.29902	0
2000	1021	31.4874	0.99574	0.996363	84.8125	-389963	12.9761	-162.909	1407.72	43.3018	-10.596	0	2.42506	2.84228	3.986	0.300689	0
2000	1020	31.3572	0.995752	0.996375	84.451	-388341	12.9254	-162.541	1404.53	43.1138	-10.611	0	2.4245	2.84244	3.989	0.302359	0
2000	1019	31.228	0.995765	0.996387	84.0922	-386731	12.8751	-162.176	1401.36	42.9272	-10.626	0	2.42394	2.84262	3.993	0.304031	0
2000	1018	31.0998	0.995778	0.996398	83.736	-385134	12.8252	-161.813	1398.21	42.742	-10.64	0	2.42338	2.84282	3.996	0.305704	0
2000	1017	30.9724	0.99579	0.99641	83.3823	-383549	12.7757	-161.452	1395.08	42.5582	-10.655	0	2.42281	2.84303	3.999	0.307379	0
2000	1016	30.846	0.995802	0.996421	83.0312	-381976	12.7265	-161.092	1391.97	42.3758	-10.67	0	2.42225	2.84327	4.003	0.309056	0
2000	1015	30.7205	0.995814	0.996433	82.6826	-380414	12.6777	-160.735	1388.88	42.1948	-10.684	0	2.42169	2.84352	4.006	0.310735	0
2000	1014	30.5959	0.995825	0.996444	82.3365	-378864	12.6292	-160.379	1385.81	42.0151	-10.699	0	2.42113	2.84379	4.009	0.312415	0
2000	1013	30.4721	0.995837	0.996454	81.9928	-377326	12.581	-160.025	1382.75	41.8367	-10.714	0	2.42057	2.84409	4.013	0.314097	0
2000	1012	30.3493	0.995848	0.996465	81.6515	-375799	12.5332	-159.673	1379.72	41.6596	-10.729	0	2.42	2.8444	4.016	0.315781	0
2000	1011	30.2272	0.995859	0.996476	81.3126	-374284	12.4857	-159.323	1376.7	41.4838	-10.744	0	2.41944	2.84474	4.019	0.317467	0
2000	1010	30.106	0.995869	0.996486	80.976	-372779	12.4386	-158.975	1373.7	41.3093	-10.758	0	2.41888	2.8451	4.022	0.319154	0
2000	1009	29.9857	0.99588	0.996496	80.6417	-371285	12.3917	-158.628	1370.72	41.136	-10.773	0	2.41831	2.84548	4.025	0.320843	0
2000	1008	29.8661	0.99589	0.996506	80.3097	-369802	12.3452	-158.283	1367.76	40.9639	-10.788	0	2.41775	2.84588	4.029	0.322534	0
2000	1007	29.7474	0.9959	0.996516	79.9799	-368330	12.299	-157.94	1364.81	40.793	-10.803	0	2.41718	2.84631	4.032	0.324227	0
2000	1006	29.6294	0.99591	0.996526	79.6522	-366868	12.2531	-157.598	1361.87	40.6233	-10.818	0	2.41662	2.84677	4.035	0.325922	0
2000	1005	29.5122	0.995919	0.996535	79.3268	-365416	12.2075	-157.258	1358.96	40.4547	-10.833	0	2.41605	2.84726	4.038	0.327618	0
2000	1004	29.3958	0.995928	0.996544	79.0034	-363974	12.1622	-156.92	1356.06	40.2873	-10.848	0	2.41548	2.84778	4.041	0.329317	0
2000	1003	29.2801	0.995937	0.996553	78.6822	-362543	12.1172	-156.584	1353.17	40.1211	-10.863	0	2.41491	2.84834	4.044	0.331017	0
2000	1002	29.1651	0.995946	0.996562	78.3629	-361121	12.0725	-156.248	1350.3	39.9559	-10.878	0	2.41434	2.84894	4.048	0.33272	0
2000	1001	29.0509	0.995954	0.996571	78.0457	-359709	12.0281	-155.915	1347.44	39.7918	-10.893	0	2.41376	2.8496	4.051	0.334424	0
2000	1000	28.9374	0.995962	0.996579	77.7305	-358306	11.9839	-155.583	1344.59	39.6288	-10.908	0	2.41319	2.85033	4.054	0.336131	0
2000	999	28.8245	0.995969	0.996587	77.4172	-356913	11.94	-155.252	1341.76	39.4668	-10.923	0	2.41261	2.85115	4.057	0.337839	0
2000	998	28.7123	0.995975	0.996594	77.1057	-355528	11.8964	-154.923	1338.94	39.3058	-10.938	0	2.41202	2.85212	4.06	0.339551	0
2000	997	28.6008	0.99598	0.9966	76.796	-354153	11.8531	-154.596	1336.13	39.1458	-10.953	0	2.41143	2.85331	4.063	0.341265	0
2000	996	28.4898	0.995982	0.996605	76.488	-352786	11.81	-154.27	1333.33	38.9866	-10.968	0	2.41084	2.85493	4.066	0.342982	0
2000	995	28.3793	0.995979	0.996606	76.1815	-351427	11.7671	-153.944	1330.53	38.8282	-10.984	0	2.41024	2.85747	4.069	0.344704	0
2000	994	28.2693	0.995961	0.996598	75.876	-350076	11.7244	-153.62	1327.72	38.6704	-10.999	0	2.4096	2.86265	4.072	0.346434	0
2000	993	28.159	0.996173	0.996735	75.5724	-348723	11.6818	-153.302	1325.1	38.5145	-11.014	0	2.40915	2.82525	4.075	0.348114	0
2000	992	28.0548	0.995271	0.996166	75.2733	-347439	11.6408	-152.965	1321.71	38.3564	-11.029	0	2.40786	2.97258	4.081	0.35004	0
2000	991	27.9266	0.995239	0.996155	74.9247	-345965	11.5937	-152.624	1318.13	38.1748	-11.045	0	2.40656	2.98312	4.087	0.35197	0
2000	990	27.7982	0.995261	0.996175	74.5762	-344497	11.5466	-152.285	1314.58	37.9934	-11.06	0	2.40526	2.98231	4.093	0.353899	0
2000	989	27.6709	0.995284	0.996194	74.231	-343042	11.5	-151.948	1311.06	37.8139	-11.075	0	2.40398	2.9815	4.099	0.355828	0
2000	988	27.5449	0.995306	0.996213	73.8891	-341601	11.4538	-151.614	1307.57	37.6361	-11.091	0	2.40269	2.98071	4.105	0.357755	0
2000	987	27.4201	0.995328	0.996232	73.5504	-340174	11.408	-151.282	1304.12	37.46	-11.106	0	2.40142	2.97993	4.111	0.359682	0
2000	986	27.2965	0.99535	0.996251	73.2149	-338760	11.3626	-150.952	1300.69	37.2857	-11.121	0	2.40015	2.97916	4.117	0.361608	0
2000	985	27.1741	0.995372	0.996269	72.8824	-337360	11.3176	-150.624	1297.3	37.113	-11.137	0	2.39888	2.97841	4.122	0.363533	0
2000	984	27.0528	0.995393	0.996287	72.553	-335972	11.273	-150.298	1293.94	36.9419	-11.152	0	2.39763	2.97766	4.128	0.365457	0
2000	983	26.9327	0.995414	0.996305	72.2266	-334598	11.2289	-149.975	1290.61	36.7725	-11.168	0	2.39637	2.97692	4.134	0.36738	0
2000	982	26.8136	0.995435	0.996323	71.9032	-333236	11.1851	-149.653	1287.3	36.6047	-11.183	0	2.39513	2.9762	4.14	0.369302	0
2000	981	26.6957	0.995455	0.99634	71.5827	-331886	11.1417	-149.334	1284.03	36.4384	-11.199	0	2.39389	2.97548	4.145	0.371223	0
2000	980	26.5789	0.995476	0.996358	71.2651	-330549	11.0987	-149.017	1280.79	36.2737	-11.214	0	2.39266	2.97478	4.151	0.373143	0
2000	979	26.4631	0.995496	0.996375	70.9504	-329224	11.056	-148.702	1277.57	36.1105	-11.23	0	2.39143	2.97409	4.156	0.375062	0
2000	978	26.3484	0.995516	0.996392	70.6384	-327911	11.0138	-148.388	1274.39	35.9489	-11.246	0	2.39021	2.97341	4.162	0.37698	0
2000	977	26.2347	0.995535	0.996409	70.3292	-326610	10.9719	-148.077	1271.23	35.7887	-11.261	0	2.38899	2.97273	4.167	0.378898	0
2000	976	26.122	0.995555	0.996426	70.0227	-325320	10.9303	-147.768	1268.09	35.63	-11.277	0	2.38778	2.97207	4.172	0.380814	0
2000	975	26.0104	0.995574	0.996442	69.7189	-324042	10.8891	-147.46	1264.99	35.4727	-11.293	0	2.38658	2.97142	4.178	0.382729	0
2000	974	25.8997	0.995593	0.996458	69.4178	-322775	10.8483	-147.155	1261.91	35.3168	-11.308	0	2.38537	2.97078	4.183	0.384644	0
2000	973	25.79	0.995612	0.996475	69.1192	-321519	10.8078	-146.851	1258.85	35.1624	-11.324	0	2.38418	2.97015	4.188	0.386557	0
2000	972	25.6813	0.995631	0.996491	68.8232	-320274	10.7676	-146.549	1255.82	35.0093	-11.34	0	2.38299	2.96953	4.193	0.388469	0
2000	971	25.5735	0.995649	0.996506	68.5298	-319040	10.7278	-146.249	1252.82	34.8575	-11.355	0	2.38181	2.96892	4.198	0.39038	0
2000	970	25.4667	0.995667	0.996522	68.2389	-317817	10.6883	-145.951	1249.84	34.7072	-11.371	0	2.38063	2.96832	4.204	0.39229	0
2000	969	25.3608	0.995685	0.996538	67.9504	-316604	10.6491	-145.655	1246.89	34.5581	-11.387	0	2.37946	2.96773	4.209	0.394199	0
2000	968	25.2558	0.995703	0.996553	67.6643	-315401	10.6103	-145.36	1243.96	34.4103	-11.403	0	2.37829	2.96715	4.214	0.396107	0
2000	967	25.1517	0.995721	0.996568	67.3807	-314209	10.5717	-145.067	1241.05	34.2639	-11.419	0	2.37712	2.96658	4.219	0.398014	0
2000	966	25.0485	0.995738	0.996583	67.0994	-313027	10.5335	-144.776	1238.16	34.1187	-11.435	0	2.37597	2.96602	4.223	0.39992	0
2000	965	24.9462	0.995756	0.996598	66.8205	-311855	10.4956	-144.487	1235.3	33.9747	-11.451	0	2.37481	2.96547	4.228	0.401825	0
2000	964	24.8448	0.995773	0.996613	66.5439	-310693	10.458	-144.199	1232.47	33.832	-11.467	0	2.37366	2.96492	4.233	0.403728	0
2000	963	24.7442	0.99579	0.996628	66.2695	-309541	10.4207	-143.913	1229.65	33.6905	-11.483	0	2.37252	2.96439	4.238	0.405631	0
2000	962	24.6444	0.995807	0.996642	65.9974	-308398	10.3837	-143.628	1226.86	33.5502	-11.499	0	2.37138	2.96387	4.243	0.407532	0
2000	961	24.5455	0.995823	0.996656	65.7275	-307265	10.347	-143.345	1224.08	33.4111	-11.515	0	2.37025	2.96336	4.247	0.409432	0
2000	960	24.4474	0.99584	0.996671	65.4598	-306141	10.3106	-143.064	1221.33	33.2732	-11.531	0	2.36912	2.96285	4.252	0.411331	0
2000	959	24.3501	0.995856	0.996685	65.1943	-305026	10.2745	-142.784	1218.6	33.1364	-11.547	0	2.36799	2.96236	4.257	0.413229	0
2000	958	24.2536	0.995872	0.996699	64.9308	-303920	10.2386	-142.506	1215.89	33.0008	-11.563	0	2.36687	2.96188	4.261	0.415125	0
2000	957	24.1579	0.995888	0.996712	64.6695	-302824	10.203	-142.23	1213.2	32.8662	-11.579	0	2.36576	2.9614	4.266	0.417021	0
2000	956	24.063	0.995904	0.996726	64.4103	-301736	10.1677	-141.955	1210.53	32.7328	-11.595	0	2.36465	2.96093	4.27	0.418915	0
2000	955	23.9688	0.99592	0.99674	64.1531	-300657	10.1327	-141.681	1207.89	32.6005	-11.611	0	2.36354	2.96048	4.275	0.420808	0
2000	954	23.8754	0.995935	0.996753	63.898	-299587	10.098	-141.409	1205.26	32.4693	-11.628	0	2.36244	2.96003	4.279	0.4227	0
2000	953	23.7828	0.995951	0.996767	63.6449	-298526	10.0635	-141.138	1202.65	32.3391	-11.644	0	2.36134	2.95959	4.283	0.42459	0
2000	952	23.6909	0.995966	0.99678	63.3937	-297472	10.0293	-140.869	1200.05	32.21	-11.66	0	2.36025	2.95916	4.288	0.426479	0
2000	951	23.5997	0.995981	0.996793	63.1445	-296428	9.99529	-140.602	1197.48	32.082	-11.676	0	2.35916	2.95874	4.292	0.428367	0
2000	950	23.5093	0.995996	0.996806	62.8972	-295391	9.96158	-140.335	1194.93	31.9549	-11.693	0	2.35807	2.95833	4.296	0.430254	0
2000	949	23.4195	0.996011	0.996819	62.6518	-294363	9.92813	-140.07	1192.39	31.8289	-11.709	0	2.35699	2.95792	4.301	0.432139	0
2000	948	23.3305	0.996026	0.996832	62.4083	-293343	9.89493	-139.807	1189.88	31.7039	-11.725	0	2.35592	2.95753	4.305	0.434023	0
2000	947	23.2422	0.99604	0.996844	62.1667	-292330	9.86197	-139.545	1187.38	31.5799	-11.742	0	2.35485	2.95715	4.309	0.435906	0
2000	946	23.1545	0.996055	0.996857	61.9269	-291326	9.82926	-139.284	1184.9	31.4568	-11.758	0	2.35378	2.95677	4.313	0.437788	0
2000	945	23.0676	0.996069	0.996869	61.6889	-290330	9.79679	-139.025	1182.43	31.3348	-11.775	0	2.35271	2.9564	4.317	0.439668	0
2000	944	22.9813	0.996083	0.996882	61.4528	-289341	9.76456	-138.767	1179.98	31.2137	-11.791	0	2.35166	2.95604	4.321	0.441546	0
2000	943	22.8957	0.996098	0.996894	61.2184	-288360	9.73257	-138.51	1177.55	31.0935	-11.808	0	2.3506	2.95569	4.325	0.443424	0
2000	942	22.8107	0.996112	0.996906	60.9857	-287386	9.70081	-138.255	1175.14	30.9742	-11.824	0	2.34955	2.95535	4.329	0.4453	0
2000	941	22.7264	0.996125	0.996918	60.7548	-286420	9.66928	-138.001	1172.74	30.8559	-11.841	0	2.3485	2.95502	4.333	0.447174	0
2000	940	22.6427	0.996139	0.99693	60.5256	-285461	9.63798	-137.748	1170.36	30.7385	-11.857	0	2.34746	2.95469	4.337	0.449047	0
2000	939	22.5597	0.996153	0.996942	60.2981	-284509	9.60691	-137.497	1168	30.622	-11.874	0	2.34641	2.95438	4.341	0.450919	0
2000	938	22.4772	0.996166	0.996954	60.0723	-283565	9.57606	-137.247	1165.65	30.5064	-11.891	0	2.34538	2.95407	4.344	0.452789	0
2000	937	22.3954	0.99618	0.996966	59.8481	-282627	9.54543	-136.998	1163.32	30.3917	-11.907	0	2.34435	2.95377	4.348	0.454658	0
2000	936	22.3143	0.996193	0.996977	59.6255	-281697	9.51502	-136.75	1161	30.2778	-11.924	0	2.34332	2.95348	4.352	0.456525	0
2000	935	22.2337	0.996206	0.996989	59.4046	-280774	9.48483	-136.503	1158.7	30.1648	-11.941	0	2.34229	2.9532	4.356	0.458391	0
2000	934	22.1537	0.99622	0.997	59.1853	-279858	9.45485	-136.258	1156.41	30.0526	-11.958	0	2.34127	2.95293	4.359	0.460256	0
2000	933	22.0743	0.996233	0.997012	58.9676	-278948	9.42508	-136.014	1154.14	29.9413	-11.974	0	2.34025	2.95266	4.363	0.462119	0
2000	932	21.9955	0.996245	0.997023	58.7514	-278045	9.39553	-135.771	1151.88	29.8308	-11.991	0	2.33924	2.9524	4.367	0.46398	0
2000	931	21.9173	0.996258	0.997034	58.5368	-277149	9.36618	-135.529	1149.64	29.7212	-12.008	0	2.33823	2.95215	4.37	0.46584	0
2000	930	21.8396	0.996271	0.997045	58.3237	-276259	9.33703	-135.289	1147.41	29.6123	-12.025	0	2.33722	2.95191	4.374	0.467698	0
2000	929	21.7626	0.996284	0.997056	58.1121	-275376	9.30809	-135.05	1145.19	29.5043	-12.042	0	2.33622	2.95168	4.377	0.469555	0
2000	928	21.6861	0.996296	0.997067	57.902	-274500	9.27935	-134.811	1142.99	29.397	-12.059	0	2.33522	2.95146	4.381	0.47141	0
2000	927	21.6101	0.996309	0.997078	57.6934	-273630	9.25081	-134.574	1140.8	29.2906	-12.076	0	2.33422	2.95124	4.384	0.473263	0
2000	926	21.5347	0.996321	0.997089	57.4863	-272766	9.22246	-134.338	1138.63	29.1849	-12.093	0	2.33323	2.95103	4.387	0.475115	0
2000	925	21.4598	0.996333	0.9971	57.2806	-271908	9.19431	-134.103	1136.47	29.08	-12.11	0	2.33224	2.95083	4.391	0.476965	0
2000	924	21.3855	0.996345	0.99711	57.0764	-271057	9.16635	-133.87	1134.33	28.9758	-12.127	0	2.33125	2.95064	4.394	0.478814	0
2000	923	21.3117	0.996358	0.997121	56.8736	-270212	9.13859	-133.637	1132.19	28.8724	-12.144	0	2.33027	2.95045	4.397	0.480661	0
2000	922	21.2384	0.99637	0.997132	56.6722	-269372	9.11101	-133.406	1130.07	28.7698	-12.161	0	2.32929	2.95027	4.401	0.482506	0
2000	921	21.1656	0.996382	0.997142	56.4722	-268539	9.08362	-133.175	1127.96	28.6679	-12.178	0	2.32831	2.9501	4.404	0.48435	0
2000	920	21.0934	0.996393	0.997152	56.2735	-267712	9.05641	-132.946	1125.87	28.5667	-12.195	0	2.32734	2.94994	4.407	0.486192	0
2000	919	21.0217	0.996405	0.997163	56.0762	-266891	9.02939	-132.717	1123.79	28.4662	-12.212	0	2.32637	2.94978	4.41	0.488032	0
2000	918	20.9504	0.996417	0.997173	55.8803	-266075	9.00255	-132.49	1121.72	28.3664	-12.23	0	2.3254	2.94964	4.413	0.48987	0
2000	917	20.8797	0.996428	0.997183	55.6857	-265265	8.97589	-132.264	1119.66	28.2674	-12.247	0	2.32444	2.9495	4.416	0.491707	0
2000	916	20.8095	0.99644	0.997193	55.4925	-264461	8.94941	-132.039	1117.62	28.169	-12.264	0	2.32348	2.94937	4.42	0.493542	0
2000	915	20.7397	0.996452	0.997203	55.3005	-263663	8.9231	-131.815	1115.58	28.0714	-12.281	0	2.32252	2.94924	4.423	0.495375	0
2000	914	20.6705	0.996463	0.997213	55.1098	-262870	8.89697	-131.591	1113.56	27.9744	-12.299	0	2.32157	2.94912	4.426	0.497207	0
2000	913	20.6017	0.996474	0.997223	54.9205	-262083	8.87101	-131.369	1111.55	27.8781	-12.316	0	2.32062	2.94901	4.429	0.499036	0
2000	912	20.5334	0.996486	0.997233	54.7324	-261301	8.84523	-131.148	1109.56	27.7825	-12.333	0	2.31967	2.94891	4.431	0.500864	0
2000	911	20.4656	0.996497	0.997243	54.5455	-260525	8.81961	-130.928	1107.57	27.6876	-12.351	0	2.31872	2.94881	4.434	0.50269	0
2000	910	20.3982	0.996508	0.997253	54.3599	-259754	8.79416	-130.709	1105.59	27.5933	-12.368	0	2.31778	2.94872	4.437	0.504514	0
2000	909	20.3313	0.996519	0.997263	54.1756	-258989	8.76888	-130.491	1103.63	27.4996	-12.386	0	2.31684	2.94864	4.44	0.506336	0
2000	908	20.2649	0.99653	0.997272	53.9924	-258228	8.74376	-130.273	1101.68	27.4066	-12.403	0	2.31591	2.94856	4.443	0.508157	0
2000	907	20.1989	0.996541	0.997282	53.8105	-257474	8.71881	-130.057	1099.74	27.3143	-12.421	0	2.31498	2.94849	4.446	0.509975	0
2000	906	20.1333	0.996552	0.997292	53.6297	-256724	8.69402	-129.842	1097.81	27.2225	-12.438	0	2.31405	2.94843	4.448	0.511792	0
2000	905	20.0682	0.996563	0.997301	53.4502	-255979	8.66939	-129.628	1095.89	27.1314	-12.456	0	2.31312	2.94837	4.451	0.513606	0
2000	904	20.0036	0.996573	0.997311	53.2718	-255240	8.64492	-129.414	1093.98	27.041	-12.474	0	2.3122	2.94832	4.454	0.515419	0
2000	903	19.9393	0.996584	0.99732	53.0946	-254505	8.62061	-129.202	1092.08	26.9511	-12.491	0	2.31128	2.94828	4.457	0.517229	0
2000	902	19.8756	0.996595	0.997329	52.9186	-253776	8.59646	-128.99	1090.19	26.8618	-12.509	0	2.31036	2.94824	4.459	0.519038	0
2000	901	19.8122	0.996605	0.997339	52.7437	-253051	8.57246	-128.779	1088.31	26.7732	-12.527	0	2.30945	2.94821	4.462	0.520845	0
2000	900	19.7493	0.996616	0.997348	52.5699	-252332	8.54861	-128.57	1086.44	26.6851	-12.544	0	2.30853	2.94818	4.464	0.52265	0
Title:	R-magma	-	mresidual	from	MZ-magma	at	T	=	1145	C
Liquid	Composition:
Pressure	Temperature	mass	SiO2	TiO2	Al2O3	Fe2O3	Cr2O3	FeO	MnO	MgO	CaO	Na2O	K2O	H2O
2000	1400	99.9969	55.6435	0.148157	17.2397	0.989197	0.00551049	5.55712	0.121267	6.4575	9.21897	3.80066	0.110383	0.708051
2000	1400	99.9969	55.6435	0.148157	17.2397	0.989197	0.00551049	5.55712	0.121267	6.4575	9.21897	3.80066	0.110383	0.708051
2000	1399	99.9969	55.6435	0.148157	17.2397	0.989312	0.00551049	5.55702	0.121267	6.4575	9.21897	3.80066	0.110383	0.708051
2000	1398	99.9969	55.6434	0.148157	17.2397	0.989427	0.00551049	5.55692	0.121267	6.4575	9.21897	3.80066	0.110383	0.708051
2000	1397	99.9969	55.6434	0.148157	17.2397	0.989544	0.00551049	5.55681	0.121267	6.4575	9.21897	3.80066	0.110383	0.708051
2000	1396	99.9969	55.6434	0.148157	17.2397	0.989662	0.00551049	5.5567	0.121267	6.4575	9.21897	3.80066	0.110383	0.708051
2000	1395	99.997	55.6434	0.148157	17.2397	0.989781	0.00551049	5.5566	0.121267	6.4575	9.21897	3.80066	0.110383	0.708051
2000	1394	99.997	55.6434	0.148157	17.2397	0.989901	0.00551048	5.55649	0.121267	6.4575	9.21897	3.80066	0.110383	0.708051
2000	1393	99.997	55.6434	0.148157	17.2397	0.990023	0.00551048	5.55638	0.121267	6.4575	9.21897	3.80066	0.110383	0.708051
2000	1392	99.997	55.6434	0.148157	17.2397	0.990145	0.00551048	5.55627	0.121267	6.4575	9.21896	3.80066	0.110383	0.708051
2000	1391	99.997	55.6434	0.148157	17.2397	0.990269	0.00551048	5.55615	0.121267	6.45749	9.21896	3.80066	0.110383	0.708051
2000	1390	99.997	55.6434	0.148157	17.2397	0.990394	0.00551048	5.55604	0.121267	6.45749	9.21896	3.80066	0.110383	0.708051
2000	1389	99.997	55.6434	0.148157	17.2397	0.990521	0.00551048	5.55593	0.121267	6.45749	9.21896	3.80066	0.110382	0.708051
2000	1388	99.997	55.6434	0.148157	17.2397	0.990648	0.00551048	5.55581	0.121267	6.45749	9.21896	3.80065	0.110382	0.70805
2000	1387	99.9971	55.6434	0.148157	17.2397	0.990777	0.00551048	5.55569	0.121267	6.45749	9.21896	3.80065	0.110382	0.70805
2000	1386	99.9971	55.6434	0.148157	17.2397	0.990907	0.00551048	5.55558	0.121267	6.45749	9.21896	3.80065	0.110382	0.70805
2000	1385	99.9971	55.6434	0.148157	17.2397	0.991038	0.00551048	5.55546	0.121267	6.45749	9.21896	3.80065	0.110382	0.70805
2000	1384	99.9971	55.6433	0.148157	17.2397	0.99117	0.00551048	5.55534	0.121267	6.45749	9.21896	3.80065	0.110382	0.70805
2000	1383	99.9971	55.6433	0.148157	17.2397	0.991304	0.00551048	5.55522	0.121267	6.45749	9.21895	3.80065	0.110382	0.70805
2000	1382	99.9971	55.6433	0.148157	17.2397	0.991439	0.00551048	5.55509	0.121267	6.45749	9.21895	3.80065	0.110382	0.70805
2000	1381	99.9971	55.6433	0.148157	17.2397	0.991575	0.00551048	5.55497	0.121267	6.45749	9.21895	3.80065	0.110382	0.70805
2000	1380	99.9971	55.6433	0.148157	17.2397	0.991712	0.00551047	5.55485	0.121267	6.45749	9.21895	3.80065	0.110382	0.70805
2000	1379	99.9972	55.6433	0.148157	17.2397	0.99185	0.00551047	5.55472	0.121267	6.45748	9.21895	3.80065	0.110382	0.70805
2000	1378	99.9972	55.6433	0.148157	17.2397	0.99199	0.00551047	5.55459	0.121267	6.45748	9.21895	3.80065	0.110382	0.708049
2000	1377	99.9972	55.6433	0.148157	17.2397	0.992131	0.00551047	5.55447	0.121267	6.45748	9.21895	3.80065	0.110382	0.708049
2000	1376	99.9972	55.6433	0.148157	17.2397	0.992273	0.00551047	5.55434	0.121267	6.45748	9.21895	3.80065	0.110382	0.708049
2000	1375	99.9972	55.6433	0.148157	17.2397	0.992417	0.00551047	5.55421	0.121267	6.45748	9.21894	3.80065	0.110382	0.708049
2000	1374	99.9972	55.6433	0.148157	17.2397	0.992561	0.00551047	5.55408	0.121267	6.45748	9.21894	3.80065	0.110382	0.708049
2000	1373	99.9972	55.6433	0.148157	17.2397	0.992707	0.00551047	5.55394	0.121267	6.45748	9.21894	3.80065	0.110382	0.708049
2000	1372	99.9973	55.6433	0.148157	17.2397	0.992854	0.00551047	5.55381	0.121267	6.45748	9.21894	3.80065	0.110382	0.708049
2000	1371	99.9973	55.6432	0.148157	17.2396	0.993003	0.00551047	5.55368	0.121267	6.45748	9.21894	3.80065	0.110382	0.708049
2000	1370	99.9973	55.6432	0.148157	17.2396	0.993153	0.00551047	5.55354	0.121267	6.45748	9.21894	3.80065	0.110382	0.708049
2000	1369	99.9973	55.6432	0.148157	17.2396	0.993304	0.00551047	5.5534	0.121267	6.45747	9.21894	3.80064	0.110382	0.708049
2000	1368	99.9973	55.6432	0.148157	17.2396	0.993456	0.00551046	5.55327	0.121267	6.45747	9.21893	3.80064	0.110382	0.708048
2000	1367	99.9973	55.6432	0.148157	17.2396	0.993609	0.00551046	5.55313	0.121267	6.45747	9.21893	3.80064	0.110382	0.708048
2000	1366	99.9974	55.6432	0.148157	17.2396	0.993764	0.00551046	5.55299	0.121267	6.45747	9.21893	3.80064	0.110382	0.708048
2000	1365	99.9974	55.6432	0.148157	17.2396	0.99392	0.00551046	5.55284	0.121267	6.45747	9.21893	3.80064	0.110382	0.708048
2000	1364	99.9974	55.6432	0.148157	17.2396	0.994078	0.00551046	5.5527	0.121267	6.45747	9.21893	3.80064	0.110382	0.708048
2000	1363	99.9974	55.6432	0.148157	17.2396	0.994236	0.00551046	5.55256	0.121267	6.45747	9.21893	3.80064	0.110382	0.708048
2000	1362	99.9974	55.6432	0.148157	17.2396	0.994396	0.00551046	5.55241	0.121267	6.45747	9.21893	3.80064	0.110382	0.708048
2000	1361	99.9974	55.6432	0.148156	17.2396	0.994558	0.00551046	5.55227	0.121267	6.45747	9.21892	3.80064	0.110382	0.708048
2000	1360	99.9974	55.6432	0.148156	17.2396	0.99472	0.00551046	5.55212	0.121267	6.45747	9.21892	3.80064	0.110382	0.708048
2000	1359	99.9975	55.6431	0.148156	17.2396	0.994884	0.00551046	5.55197	0.121267	6.45746	9.21892	3.80064	0.110382	0.708047
2000	1358	99.9975	55.6431	0.148156	17.2396	0.995049	0.00551046	5.55182	0.121267	6.45746	9.21892	3.80064	0.110382	0.708047
2000	1357	99.9975	55.6431	0.148156	17.2396	0.995216	0.00551045	5.55167	0.121267	6.45746	9.21892	3.80064	0.110382	0.708047
2000	1356	99.9975	55.6431	0.148156	17.2396	0.995383	0.00551045	5.55152	0.121267	6.45746	9.21892	3.80064	0.110382	0.708047
2000	1355	99.9975	55.6431	0.148156	17.2396	0.995552	0.00551045	5.55137	0.121266	6.45746	9.21891	3.80064	0.110382	0.708047
2000	1354	99.9975	55.6431	0.148156	17.2396	0.995723	0.00551045	5.55121	0.121266	6.45746	9.21891	3.80064	0.110382	0.708047
2000	1353	99.9976	55.6431	0.148156	17.2396	0.995895	0.00551045	5.55106	0.121266	6.45746	9.21891	3.80063	0.110382	0.708047
2000	1352	99.9976	55.6431	0.148156	17.2396	0.996068	0.00551045	5.5509	0.121266	6.45746	9.21891	3.80063	0.110382	0.708047
2000	1351	99.9976	55.6431	0.148156	17.2396	0.996242	0.00551045	5.55074	0.121266	6.45746	9.21891	3.80063	0.110382	0.708046
2000	1350	99.9976	55.6431	0.148156	17.2396	0.996418	0.00551045	5.55058	0.121266	6.45745	9.21891	3.80063	0.110382	0.708046
2000	1349	99.9976	55.643	0.148156	17.2396	0.996595	0.00551045	5.55042	0.121266	6.45745	9.21891	3.80063	0.110382	0.708046
2000	1348	99.9977	55.643	0.148156	17.2396	0.996773	0.00551045	5.55026	0.121266	6.45745	9.2189	3.80063	0.110382	0.708046
2000	1347	99.9977	55.643	0.148156	17.2396	0.996953	0.00551045	5.5501	0.121266	6.45745	9.2189	3.80063	0.110382	0.708046
2000	1346	99.9977	55.643	0.148156	17.2396	0.997134	0.00551044	5.54993	0.121266	6.45745	9.2189	3.80063	0.110382	0.708046
2000	1345	99.9977	55.643	0.148156	17.2396	0.997317	0.00551044	5.54977	0.121266	6.45745	9.2189	3.80063	0.110382	0.708046
2000	1344	99.9977	55.643	0.148156	17.2396	0.9975	0.00551044	5.5496	0.121266	6.45745	9.2189	3.80063	0.110382	0.708046
2000	1343	99.9977	55.643	0.148156	17.2396	0.997686	0.00551044	5.54943	0.121266	6.45745	9.2189	3.80063	0.110382	0.708045
2000	1342	99.9978	55.643	0.148156	17.2396	0.997872	0.00551044	5.54926	0.121266	6.45745	9.21889	3.80063	0.110382	0.708045
2000	1341	99.9978	55.643	0.148156	17.2396	0.99806	0.00551044	5.54909	0.121266	6.45744	9.21889	3.80063	0.110382	0.708045
2000	1340	99.9978	55.643	0.148156	17.2396	0.998249	0.00551044	5.54892	0.121266	6.45744	9.21889	3.80063	0.110382	0.708045
2000	1339	99.9978	55.6429	0.148156	17.2396	0.99844	0.00551044	5.54875	0.121266	6.45744	9.21889	3.80063	0.110382	0.708045
2000	1338	99.9978	55.6429	0.148156	17.2396	0.998632	0.00551044	5.54857	0.121266	6.45744	9.21889	3.80062	0.110382	0.708045
2000	1337	99.9979	55.6429	0.148156	17.2395	0.998825	0.00551044	5.5484	0.121266	6.45744	9.21888	3.80062	0.110382	0.708045
2000	1336	99.9979	55.6429	0.148156	17.2395	0.99902	0.00551043	5.54822	0.121266	6.45744	9.21888	3.80062	0.110382	0.708044
2000	1335	99.9979	55.6429	0.148156	17.2395	0.999216	0.00551043	5.54804	0.121266	6.45744	9.21888	3.80062	0.110382	0.708044
2000	1334	99.9979	55.6429	0.148156	17.2395	0.999414	0.00551043	5.54787	0.121266	6.45744	9.21888	3.80062	0.110382	0.708044
2000	1333	99.9979	55.6429	0.148156	17.2395	0.999613	0.00551043	5.54769	0.121266	6.45743	9.21888	3.80062	0.110381	0.708044
2000	1332	99.998	55.6429	0.148156	17.2395	0.999813	0.00551043	5.5475	0.121266	6.45743	9.21888	3.80062	0.110381	0.708044
2000	1331	99.998	55.6429	0.148156	17.2395	1.00001	0.00551043	5.54732	0.121266	6.45743	9.21887	3.80062	0.110381	0.708044
2000	1330	99.998	55.6428	0.148156	17.2395	1.00022	0.00551043	5.54714	0.121266	6.45743	9.21887	3.80062	0.110381	0.708044
2000	1329	99.998	55.6428	0.148156	17.2395	1.00042	0.00551043	5.54695	0.121266	6.45743	9.21887	3.80062	0.110381	0.708043
2000	1328	99.998	55.6428	0.148156	17.2395	1.00063	0.00551043	5.54676	0.121266	6.45743	9.21887	3.80062	0.110381	0.708043
2000	1327	99.9981	55.6428	0.148156	17.2395	1.00084	0.00551042	5.54658	0.121266	6.45743	9.21887	3.80062	0.110381	0.708043
2000	1326	99.9981	55.6428	0.148156	17.2395	1.00105	0.00551042	5.54639	0.121266	6.45742	9.21886	3.80062	0.110381	0.708043
2000	1325	99.9981	55.6428	0.148155	17.2395	1.00126	0.00551042	5.5462	0.121266	6.45742	9.21886	3.80061	0.110381	0.708043
2000	1324	99.9981	55.6428	0.148155	17.2395	1.00147	0.00551042	5.546	0.121266	6.45742	9.21886	3.80061	0.110381	0.708043
2000	1323	99.9981	55.6428	0.148155	17.2395	1.00168	0.00551042	5.54581	0.121266	6.45742	9.21886	3.80061	0.110381	0.708043
2000	1322	99.9982	55.6427	0.148155	17.2395	1.0019	0.00551042	5.54562	0.121266	6.45742	9.21886	3.80061	0.110381	0.708042
2000	1321	99.9982	55.6427	0.148155	17.2395	1.00211	0.00551042	5.54542	0.121266	6.45742	9.21885	3.80061	0.110381	0.708042
2000	1320	99.9982	55.6427	0.148155	17.2395	1.00233	0.00551042	5.54522	0.121266	6.45742	9.21885	3.80061	0.110381	0.708042
2000	1319	99.9982	55.6427	0.148155	17.2395	1.00255	0.00551041	5.54503	0.121266	6.45741	9.21885	3.80061	0.110381	0.708042
2000	1318	99.9983	55.6427	0.148155	17.2395	1.00277	0.00551041	5.54483	0.121266	6.45741	9.21885	3.80061	0.110381	0.708042
2000	1317	99.9983	55.6427	0.148155	17.2395	1.00299	0.00551041	5.54462	0.121266	6.45741	9.21885	3.80061	0.110381	0.708042
2000	1316	99.9983	55.6427	0.148155	17.2395	1.00321	0.00551041	5.54442	0.121266	6.45741	9.21884	3.80061	0.110381	0.708042
2000	1315	99.9983	55.6427	0.148155	17.2395	1.00344	0.00551041	5.54422	0.121266	6.45741	9.21884	3.80061	0.110381	0.708041
2000	1314	99.9983	55.6427	0.148155	17.2395	1.00366	0.00551041	5.54401	0.121266	6.45741	9.21884	3.80061	0.110381	0.708041
2000	1313	99.9984	55.6426	0.148155	17.2395	1.00389	0.00551041	5.54381	0.121265	6.45741	9.21884	3.8006	0.110381	0.708041
2000	1312	99.9984	55.6426	0.148155	17.2395	1.00412	0.00551041	5.5436	0.121265	6.4574	9.21884	3.8006	0.110381	0.708041
2000	1311	99.9984	55.6426	0.148155	17.2395	1.00435	0.0055104	5.54339	0.121265	6.4574	9.21883	3.8006	0.110381	0.708041
2000	1310	99.9984	55.6426	0.148155	17.2394	1.00458	0.0055104	5.54318	0.121265	6.4574	9.21883	3.8006	0.110381	0.708041
2000	1309	99.9985	55.6426	0.148155	17.2394	1.00482	0.0055104	5.54297	0.121265	6.4574	9.21883	3.8006	0.110381	0.70804
2000	1308	99.9985	55.6426	0.148155	17.2394	1.00505	0.0055104	5.54275	0.121265	6.4574	9.21883	3.8006	0.110381	0.70804
2000	1307	99.9985	55.6426	0.148155	17.2394	1.00529	0.0055104	5.54254	0.121265	6.4574	9.21882	3.8006	0.110381	0.70804
2000	1306	99.9985	55.6425	0.148155	17.2394	1.00553	0.0055104	5.54232	0.121265	6.4574	9.21882	3.8006	0.110381	0.70804
2000	1305	99.9986	55.6425	0.148155	17.2394	1.00577	0.0055104	5.54211	0.121265	6.45739	9.21882	3.8006	0.110381	0.70804
2000	1304	99.9986	55.6425	0.148155	17.2394	1.00601	0.0055104	5.54189	0.121265	6.45739	9.21882	3.8006	0.110381	0.70804
2000	1303	99.9986	55.6425	0.148155	17.2394	1.00625	0.00551039	5.54167	0.121265	6.45739	9.21882	3.8006	0.110381	0.708039
2000	1302	99.9986	55.6425	0.148155	17.2394	1.0065	0.00551039	5.54145	0.121265	6.45739	9.21881	3.80059	0.110381	0.708039
2000	1301	99.9987	55.6425	0.148155	17.2394	1.00674	0.00551039	5.54122	0.121265	6.45739	9.21881	3.80059	0.110381	0.708039
2000	1300	99.9987	55.6425	0.148155	17.2394	1.00699	0.00551039	5.541	0.121265	6.45739	9.21881	3.80059	0.110381	0.708039
2000	1299	99.9987	55.6425	0.148155	17.2394	1.00724	0.00551039	5.54077	0.121265	6.45738	9.21881	3.80059	0.110381	0.708039
2000	1298	99.9987	55.6424	0.148155	17.2394	1.00749	0.00551039	5.54055	0.121265	6.45738	9.2188	3.80059	0.110381	0.708038
2000	1297	99.9988	55.6424	0.148155	17.2394	1.00774	0.00551039	5.54032	0.121265	6.45738	9.2188	3.80059	0.110381	0.708038
2000	1296	99.9988	55.6424	0.148154	17.2394	1.008	0.00551038	5.54009	0.121265	6.45738	9.2188	3.80059	0.110381	0.708038
2000	1295	99.9988	55.6424	0.148154	17.2394	1.00825	0.00551038	5.53986	0.121265	6.45738	9.2188	3.80059	0.110381	0.708038
2000	1294	99.9988	55.6424	0.148154	17.2394	1.00851	0.00551038	5.53962	0.121265	6.45738	9.2188	3.80059	0.11038	0.708038
2000	1293	99.9989	55.6424	0.148154	17.2394	1.00877	0.00551038	5.53939	0.121265	6.45737	9.21879	3.80059	0.11038	0.708038
2000	1292	99.9989	55.6424	0.148154	17.2394	1.00903	0.00551038	5.53915	0.121265	6.45737	9.21879	3.80058	0.11038	0.708037
2000	1291	99.9989	55.6423	0.148154	17.2394	1.00929	0.00551038	5.53892	0.121265	6.45737	9.21879	3.80058	0.11038	0.708037
2000	1290	99.9989	55.6423	0.148154	17.2394	1.00955	0.00551038	5.53868	0.121265	6.45737	9.21879	3.80058	0.11038	0.708037
2000	1289	99.999	55.6423	0.148154	17.2394	1.00982	0.00551037	5.53844	0.121265	6.45737	9.21878	3.80058	0.11038	0.708037
2000	1288	99.999	55.6423	0.148154	17.2394	1.01008	0.00551037	5.5382	0.121265	6.45737	9.21878	3.80058	0.11038	0.708037
2000	1287	99.999	55.6423	0.148154	17.2393	1.01035	0.00551037	5.53796	0.121265	6.45736	9.21878	3.80058	0.11038	0.708036
2000	1286	99.999	55.6423	0.148154	17.2393	1.01062	0.00551037	5.53771	0.121265	6.45736	9.21878	3.80058	0.11038	0.708036
2000	1285	99.9991	55.6422	0.148154	17.2393	1.01089	0.00551037	5.53747	0.121265	6.45736	9.21877	3.80058	0.11038	0.708036
2000	1284	99.9991	55.6422	0.148154	17.2393	1.01116	0.00551037	5.53722	0.121265	6.45736	9.21877	3.80058	0.11038	0.708036
2000	1283	99.9991	55.6422	0.148154	17.2393	1.01144	0.00551037	5.53697	0.121265	6.45736	9.21877	3.80058	0.11038	0.708036
2000	1282	99.9992	55.6422	0.148154	17.2393	1.01171	0.00551036	5.53672	0.121265	6.45736	9.21877	3.80057	0.11038	0.708035
2000	1281	99.9992	55.6422	0.148154	17.2393	1.01199	0.00551036	5.53647	0.121264	6.45735	9.21876	3.80057	0.11038	0.708035
2000	1280	99.9992	55.6422	0.148154	17.2393	1.01227	0.00551036	5.53622	0.121264	6.45735	9.21876	3.80057	0.11038	0.708035
2000	1279	99.9992	55.6422	0.148154	17.2393	1.01255	0.00551036	5.53596	0.121264	6.45735	9.21876	3.80057	0.11038	0.708035
2000	1278	99.9993	55.6421	0.148154	17.2393	1.01283	0.00551036	5.5357	0.121264	6.45735	9.21876	3.80057	0.11038	0.708035
2000	1277	99.9993	55.6421	0.148154	17.2393	1.01312	0.00551036	5.53545	0.121264	6.45735	9.21875	3.80057	0.11038	0.708034
2000	1276	99.9993	55.6421	0.148154	17.2393	1.0134	0.00551035	5.53519	0.121264	6.45734	9.21875	3.80057	0.11038	0.708034
2000	1275	99.9994	55.6421	0.148154	17.2393	1.01369	0.00551035	5.53493	0.121264	6.45734	9.21875	3.80057	0.11038	0.708034
2000	1274	99.9994	55.6421	0.148154	17.2393	1.01398	0.00551035	5.53467	0.121264	6.45734	9.21874	3.80057	0.11038	0.708034
2000	1273	99.9994	55.6421	0.148154	17.2393	1.01427	0.00551035	5.5344	0.121264	6.45734	9.21874	3.80056	0.11038	0.708034
2000	1272	99.9994	55.642	0.148154	17.2393	1.01456	0.00551035	5.53414	0.121264	6.45734	9.21874	3.80056	0.11038	0.708033
2000	1271	99.9995	55.642	0.148153	17.2393	1.01486	0.00551035	5.53387	0.121264	6.45734	9.21874	3.80056	0.11038	0.708033
2000	1270	99.9995	55.642	0.148153	17.2393	1.01515	0.00551034	5.5336	0.121264	6.45733	9.21873	3.80056	0.11038	0.708033
2000	1269	99.9995	55.642	0.148153	17.2393	1.01545	0.00551034	5.53333	0.121264	6.45733	9.21873	3.80056	0.11038	0.708033
2000	1268	99.9996	55.642	0.148153	17.2393	1.01575	0.00551034	5.53306	0.121264	6.45733	9.21873	3.80056	0.11038	0.708033
2000	1267	99.9996	55.642	0.148153	17.2393	1.01605	0.00551034	5.53279	0.121264	6.45733	9.21873	3.80056	0.11038	0.708032
2000	1266	99.9996	55.6419	0.148153	17.2392	1.01635	0.00551034	5.53252	0.121264	6.45733	9.21872	3.80056	0.11038	0.708032
2000	1265	99.9996	55.6419	0.148153	17.2392	1.01666	0.00551034	5.53224	0.121264	6.45732	9.21872	3.80056	0.11038	0.708032
2000	1264	99.9997	55.6419	0.148153	17.2392	1.01696	0.00551033	5.53196	0.121264	6.45732	9.21872	3.80055	0.11038	0.708032
2000	1263	99.9997	55.6419	0.148153	17.2392	1.01727	0.00551033	5.53168	0.121264	6.45732	9.21871	3.80055	0.11038	0.708032
2000	1262	99.9997	55.6419	0.148153	17.2392	1.01758	0.00551033	5.5314	0.121264	6.45732	9.21871	3.80055	0.110379	0.708031
2000	1261	99.9998	55.6419	0.148153	17.2392	1.01789	0.00551033	5.53112	0.121264	6.45732	9.21871	3.80055	0.110379	0.708031
2000	1260	99.9998	55.6418	0.148153	17.2392	1.0182	0.00551033	5.53084	0.121264	6.45731	9.21871	3.80055	0.110379	0.708031
2000	1259	99.9998	55.6418	0.148153	17.2392	1.01852	0.00551033	5.53055	0.121264	6.45731	9.2187	3.80055	0.110379	0.708031
2000	1258	99.9999	55.6418	0.148153	17.2392	1.01883	0.00551032	5.53027	0.121264	6.45731	9.2187	3.80055	0.110379	0.70803
2000	1257	99.9999	55.6418	0.148153	17.2392	1.01915	0.00551032	5.52998	0.121264	6.45731	9.2187	3.80055	0.110379	0.70803
2000	1256	99.9999	55.6418	0.148153	17.2392	1.01947	0.00551032	5.52969	0.121264	6.45731	9.21869	3.80055	0.110379	0.70803
2000	1255	100	55.6418	0.148153	17.2392	1.01979	0.00551032	5.5294	0.121264	6.4573	9.21869	3.80054	0.110379	0.70803
2000	1254	100	55.6417	0.148153	17.2392	1.02012	0.00551032	5.5291	0.121264	6.4573	9.21869	3.80054	0.110379	0.708029
2000	1253	100	55.6417	0.148153	17.2392	1.02044	0.00551032	5.52881	0.121263	6.4573	9.21868	3.80054	0.110379	0.708029
2000	1252	100	55.6417	0.148153	17.2392	1.02077	0.00551031	5.52851	0.121263	6.4573	9.21868	3.80054	0.110379	0.708029
2000	1251	100	55.6417	0.148153	17.2392	1.0211	0.00551031	5.52821	0.121263	6.45729	9.21868	3.80054	0.110379	0.708029
2000	1250	100	55.6417	0.148152	17.2392	1.02143	0.00551031	5.52792	0.121263	6.45729	9.21868	3.80054	0.110379	0.708029
2000	1249	100	55.6416	0.148152	17.2392	1.02176	0.00551031	5.52761	0.121263	6.45729	9.21867	3.80054	0.110379	0.708028
2000	1248	100	55.6416	0.148152	17.2391	1.02209	0.00551031	5.52731	0.121263	6.45729	9.21867	3.80054	0.110379	0.708028
2000	1247	100	55.6416	0.148152	17.2391	1.02243	0.0055103	5.52701	0.121263	6.45729	9.21867	3.80053	0.110379	0.708028
2000	1246	100	55.6416	0.148152	17.2391	1.02277	0.0055103	5.5267	0.121263	6.45728	9.21866	3.80053	0.110379	0.708028
2000	1245	100	55.6416	0.148152	17.2391	1.02311	0.0055103	5.52639	0.121263	6.45728	9.21866	3.80053	0.110379	0.708027
2000	1244	100	55.6415	0.148152	17.2391	1.02345	0.0055103	5.52608	0.121263	6.45728	9.21866	3.80053	0.110379	0.708027
2000	1243	100	55.6415	0.148152	17.2391	1.02379	0.0055103	5.52577	0.121263	6.45728	9.21865	3.80053	0.110379	0.708027
2000	1242	100	55.6415	0.148152	17.2391	1.02414	0.0055103	5.52546	0.121263	6.45728	9.21865	3.80053	0.110379	0.708027
2000	1241	100	55.6415	0.148152	17.2391	1.02448	0.00551029	5.52515	0.121263	6.45727	9.21865	3.80053	0.110379	0.708026
2000	1240	100	55.6415	0.148152	17.2391	1.02483	0.00551029	5.52483	0.121263	6.45727	9.21864	3.80052	0.110379	0.708026
2000	1239	100.001	55.6415	0.148152	17.2391	1.02518	0.00551029	5.52451	0.121263	6.45727	9.21864	3.80052	0.110379	0.708026
2000	1238	100.001	55.6414	0.148152	17.2391	1.02553	0.00551029	5.52419	0.121263	6.45727	9.21864	3.80052	0.110379	0.708026
2000	1237	100.001	55.6414	0.148152	17.2391	1.02589	0.00551029	5.52387	0.121263	6.45726	9.21863	3.80052	0.110379	0.708025
2000	1236	100.001	55.6414	0.148152	17.2391	1.02625	0.00551028	5.52355	0.121263	6.45726	9.21863	3.80052	0.110379	0.708025
2000	1235	100.001	55.6414	0.148152	17.2391	1.0266	0.00551028	5.52322	0.121263	6.45726	9.21863	3.80052	0.110378	0.708025
2000	1234	100.001	55.6414	0.148152	17.2391	1.02696	0.00551028	5.5229	0.121263	6.45726	9.21862	3.80052	0.110378	0.708025
2000	1233	100.001	55.6413	0.148152	17.2391	1.02732	0.00551028	5.52257	0.121263	6.45725	9.21862	3.80052	0.110378	0.708024
2000	1232	100.001	55.6413	0.148152	17.239	1.02769	0.00551028	5.52224	0.121263	6.45725	9.21862	3.80051	0.110378	0.708024
2000	1231	100.001	55.6413	0.148152	17.239	1.02805	0.00551027	5.52191	0.121263	6.45725	9.21861	3.80051	0.110378	0.708024
2000	1230	100.001	55.6413	0.148151	17.239	1.02842	0.00551027	5.52158	0.121262	6.45725	9.21861	3.80051	0.110378	0.708024
2000	1229	100.001	55.6412	0.148151	17.239	1.02879	0.00551027	5.52124	0.121262	6.45725	9.21861	3.80051	0.110378	0.708023
2000	1228	100.001	55.6412	0.148151	17.239	1.02916	0.00551027	5.52091	0.121262	6.45724	9.2186	3.80051	0.110378	0.708023
2000	1227	100.001	55.6412	0.148151	17.239	1.02954	0.00551027	5.52057	0.121262	6.45724	9.2186	3.80051	0.110378	0.708023
2000	1226	100.001	55.6412	0.148151	17.239	1.02991	0.00551026	5.52023	0.121262	6.45724	9.2186	3.80051	0.110378	0.708023
2000	1225	100.001	55.6412	0.148151	17.239	1.03029	0.00551026	5.51989	0.121262	6.45724	9.21859	3.8005	0.110378	0.708022
2000	1224	100.001	55.6411	0.148151	17.239	1.03067	0.00551026	5.51954	0.121262	6.45723	9.21859	3.8005	0.110378	0.708022
2000	1223	100.001	55.6411	0.148151	17.239	1.03105	0.00551026	5.5192	0.121262	6.45723	9.21859	3.8005	0.110378	0.708022
2000	1222	100.001	55.6411	0.148151	17.239	1.03143	0.00551025	5.51885	0.121262	6.45723	9.21858	3.8005	0.110378	0.708021
2000	1221	100.001	55.6411	0.148151	17.239	1.03181	0.00551025	5.5185	0.121262	6.45723	9.21858	3.8005	0.110378	0.708021
2000	1220	100.001	55.6411	0.148151	17.239	1.0322	0.00551025	5.51815	0.121262	6.45722	9.21858	3.8005	0.110378	0.708021
2000	1219	100.001	55.641	0.148151	17.239	1.03259	0.00551025	5.5178	0.121262	6.45722	9.21857	3.8005	0.110378	0.708021
2000	1218	100.001	55.641	0.148151	17.239	1.03298	0.00551025	5.51744	0.121262	6.45722	9.21857	3.80049	0.110378	0.70802
2000	1217	100.001	55.641	0.148151	17.239	1.03337	0.00551024	5.51709	0.121262	6.45722	9.21857	3.80049	0.110378	0.70802
2000	1216	100.001	55.641	0.148151	17.2389	1.03377	0.00551024	5.51673	0.121262	6.45721	9.21856	3.80049	0.110378	0.70802
2000	1215	100.001	55.6409	0.148151	17.2389	1.03417	0.00551024	5.51637	0.121262	6.45721	9.21856	3.80049	0.110378	0.70802
2000	1214	100.001	55.6409	0.148151	17.2389	1.03456	0.00551024	5.51601	0.121262	6.45721	9.21855	3.80049	0.110378	0.708019
2000	1213	100.001	55.6409	0.14815	17.2389	1.03496	0.00551024	5.51565	0.121262	6.45721	9.21855	3.80049	0.110378	0.708019
2000	1212	100.002	55.6409	0.14815	17.2389	1.03537	0.00551023	5.51528	0.121262	6.4572	9.21855	3.80048	0.110378	0.708019
2000	1211	100.002	55.6409	0.14815	17.2389	1.03577	0.00551023	5.51491	0.121262	6.4572	9.21854	3.80048	0.110377	0.708018
2000	1210	100.002	55.6408	0.14815	17.2389	1.03618	0.00551023	5.51455	0.121262	6.4572	9.21854	3.80048	0.110377	0.708018
2000	1209	100.002	55.6408	0.14815	17.2389	1.03659	0.00551023	5.51418	0.121262	6.45719	9.21854	3.80048	0.110377	0.708018
2000	1208	100.002	55.6408	0.14815	17.2389	1.037	0.00551022	5.5138	0.121261	6.45719	9.21853	3.80048	0.110377	0.708018
2000	1207	100.002	55.6408	0.14815	17.2389	1.03741	0.00551022	5.51343	0.121261	6.45719	9.21853	3.80048	0.110377	0.708017
2000	1206	100.002	55.6407	0.14815	17.2389	1.03783	0.00551022	5.51305	0.121261	6.45719	9.21852	3.80048	0.110377	0.708017
2000	1205	100.002	55.6407	0.14815	17.2389	1.03824	0.00551022	5.51268	0.121261	6.45718	9.21852	3.80047	0.110377	0.708017
2000	1204	100.002	55.6407	0.14815	17.2389	1.03866	0.00551021	5.5123	0.121261	6.45718	9.21852	3.80047	0.110377	0.708016
2000	1203	100.002	55.6407	0.14815	17.2389	1.03908	0.00551021	5.51191	0.121261	6.45718	9.21851	3.80047	0.110377	0.708016
2000	1202	100.002	55.6407	0.14815	17.2388	1.03951	0.00551021	5.51153	0.121261	6.45718	9.21851	3.80047	0.110377	0.708016
2000	1201	100.002	55.6406	0.14815	17.2388	1.03993	0.00551021	5.51114	0.121261	6.45717	9.2185	3.80047	0.110377	0.708015
2000	1200	100.002	55.6406	0.14815	17.2388	1.04036	0.00551021	5.51076	0.121261	6.45717	9.2185	3.80047	0.110377	0.708015
2000	1199	100.002	55.6406	0.14815	17.2388	1.04079	0.0055102	5.51037	0.121261	6.45717	9.2185	3.80046	0.110377	0.708015
2000	1198	100.002	55.6406	0.14815	17.2388	1.04122	0.0055102	5.50998	0.121261	6.45716	9.21849	3.80046	0.110377	0.708015
2000	1197	100.002	55.6405	0.148149	17.2388	1.04166	0.0055102	5.50958	0.121261	6.45716	9.21849	3.80046	0.110377	0.708014
2000	1196	100.002	55.6405	0.148149	17.2388	1.04209	0.0055102	5.50919	0.121261	6.45716	9.21848	3.80046	0.110377	0.708014
2000	1195	100.002	55.6405	0.148149	17.2388	1.04253	0.00551019	5.50879	0.121261	6.45716	9.21848	3.80046	0.110377	0.708014
2000	1194	100.002	55.6405	0.148149	17.2388	1.04297	0.00551019	5.50839	0.121261	6.45715	9.21848	3.80046	0.110377	0.708013
2000	1193	100.002	55.6404	0.148149	17.2388	1.04341	0.00551019	5.50799	0.121261	6.45715	9.21847	3.80045	0.110377	0.708013
2000	1192	100.002	55.6404	0.148149	17.2388	1.04386	0.00551019	5.50759	0.121261	6.45715	9.21847	3.80045	0.110377	0.708013
2000	1191	99.7926	55.6412	0.148431	17.27	1.0438	0.00552177	5.50029	0.121516	6.40712	9.23359	3.80839	0.110609	0.709501
2000	1190	99.66	55.6417	0.14861	17.2898	1.04392	0.00552911	5.49548	0.121677	6.37545	9.24315	3.81343	0.110756	0.710445
2000	1189	99.528	55.6423	0.148788	17.3096	1.04404	0.00553645	5.49064	0.121839	6.34388	9.25268	3.81845	0.110903	0.711387
2000	1188	99.3965	55.6428	0.148966	17.3293	1.04415	0.00554377	5.48576	0.122	6.3124	9.26217	3.82347	0.111049	0.712328
2000	1187	98.6743	55.6695	0.150016	17.306	1.04823	0.00558435	5.50037	0.122893	6.27283	9.25778	3.83744	0.111804	0.717542
2000	1186	97.505	55.7167	0.151758	17.2487	1.05544	0.00565132	5.53026	0.124366	6.22708	9.24251	3.85838	0.113039	0.726147
2000	1185	96.3635	55.7637	0.153499	17.1915	1.06261	0.00571826	5.55992	0.12584	6.18165	9.22734	3.87919	0.114272	0.734749
2000	1184	95.2488	55.8104	0.155239	17.1346	1.06976	0.00578518	5.58935	0.127312	6.13652	9.21227	3.89987	0.115503	0.743347
2000	1183	94.1601	55.857	0.156979	17.0779	1.07689	0.00585207	5.61855	0.128784	6.0917	9.19731	3.92042	0.116732	0.751942
2000	1182	93.0963	55.9033	0.158718	17.0213	1.08399	0.00591894	5.64753	0.130256	6.04718	9.18244	3.94084	0.117959	0.760534
2000	1181	92.0567	55.9494	0.160456	16.965	1.09106	0.00598578	5.67628	0.131727	6.00296	9.16767	3.96114	0.119184	0.769123
2000	1180	91.0405	55.9953	0.162194	16.9088	1.09811	0.0060526	5.70482	0.133197	5.95904	9.153	3.98132	0.120408	0.777708
2000	1179	90.0469	56.041	0.16393	16.8529	1.10514	0.00611939	5.73314	0.134667	5.9154	9.13841	4.00137	0.121629	0.78629
2000	1178	89.0751	56.0866	0.165666	16.7971	1.11213	0.00618615	5.76125	0.136136	5.87206	9.12392	4.0213	0.122848	0.794868
2000	1177	88.1245	56.1319	0.167402	16.7415	1.11911	0.00625288	5.78914	0.137605	5.829	9.10952	4.04112	0.124065	0.803443
2000	1176	87.1943	56.177	0.169136	16.6861	1.12606	0.00631959	5.81682	0.139073	5.78622	9.0952	4.06081	0.12528	0.812014
2000	1175	86.1099	56.2339	0.170976	16.681	1.13102	0.00639917	5.84567	0.140824	5.72584	9.0244	4.09096	0.126764	0.822239
2000	1174	85.1204	56.2857	0.172769	16.6561	1.13671	0.00647356	5.87376	0.142461	5.67309	8.97628	4.11671	0.128138	0.831798
2000	1173	84.1547	56.3374	0.174556	16.631	1.14237	0.00654784	5.90163	0.144096	5.62086	8.92853	4.14224	0.129508	0.841343
2000	1172	83.212	56.3887	0.17634	16.6057	1.14801	0.00662202	5.92927	0.145728	5.56913	8.88114	4.16757	0.130875	0.850874
2000	1171	82.2915	56.4399	0.178118	16.5803	1.15361	0.0066961	5.9567	0.147359	5.51791	8.83411	4.19269	0.132238	0.860392
2000	1170	81.3923	56.4907	0.179892	16.5548	1.15918	0.00677007	5.98391	0.148986	5.46718	8.78742	4.2176	0.133598	0.869897
2000	1169	80.5138	56.5414	0.181662	16.5292	1.16472	0.00684394	6.01091	0.150612	5.41694	8.74109	4.24232	0.134955	0.879389
2000	1168	79.6552	56.5918	0.183427	16.5034	1.17024	0.00691771	6.03771	0.152235	5.36719	8.6951	4.26684	0.136308	0.888868
2000	1167	78.8159	56.6419	0.185188	16.4775	1.17573	0.00699138	6.06431	0.153857	5.31791	8.64945	4.29116	0.137657	0.898334
2000	1166	77.9952	56.6918	0.186944	16.4515	1.18119	0.00706495	6.0907	0.155476	5.26911	8.60414	4.31528	0.139003	0.907786
2000	1165	77.1924	56.7415	0.188696	16.4254	1.18662	0.00713842	6.1169	0.157092	5.22077	8.55916	4.33922	0.140346	0.917226
2000	1164	76.3854	56.7938	0.190495	16.3997	1.19134	0.00721383	6.1385	0.158752	5.17267	8.51498	4.36387	0.141724	0.926917
2000	1163	75.5906	56.8462	0.192306	16.3733	1.19607	0.00728969	6.15981	0.160421	5.12444	8.47196	4.38845	0.143109	0.936663
2000	1162	74.8131	56.8984	0.194114	16.3467	1.20077	0.00736545	6.18094	0.162089	5.07668	8.42924	4.41284	0.14449	0.946398
2000	1161	74.0523	56.9503	0.195917	16.32	1.20546	0.00744111	6.20188	0.163754	5.02938	8.38683	4.43704	0.145867	0.95612
2000	1160	73.3078	57.002	0.197716	16.2932	1.21012	0.00751669	6.22265	0.165417	4.98253	8.34471	4.46106	0.147242	0.965831
2000	1159	72.579	57.0535	0.199511	16.2662	1.21476	0.00759217	6.24325	0.167078	4.93613	8.30289	4.48489	0.148613	0.97553
2000	1158	71.8653	57.1048	0.201302	16.2392	1.21937	0.00766756	6.26368	0.168737	4.89018	8.26136	4.50854	0.149981	0.985217
2000	1157	71.1664	57.1558	0.203089	16.212	1.22397	0.00774286	6.28393	0.170394	4.84467	8.22012	4.532	0.151346	0.994893
2000	1156	70.4818	57.2066	0.204871	16.1848	1.22854	0.00781807	6.30402	0.172049	4.79959	8.17917	4.55529	0.152708	1.00456
2000	1155	69.811	57.2572	0.20665	16.1574	1.2331	0.0078932	6.32395	0.173703	4.75493	8.13851	4.5784	0.154066	1.01421
2000	1154	69.1536	57.3076	0.208426	16.1299	1.23763	0.00796823	6.34372	0.175354	4.71071	8.09813	4.60134	0.155422	1.02385
2000	1153	68.5092	57.3577	0.210197	16.1023	1.24215	0.00804318	6.36333	0.177003	4.6669	8.05802	4.6241	0.156774	1.03348
2000	1152	67.8774	57.4077	0.211965	16.0746	1.24665	0.00811804	6.38278	0.178651	4.6235	8.0182	4.64668	0.158124	1.0431
2000	1151	67.2579	57.4574	0.213728	16.0468	1.25113	0.00819282	6.40208	0.180296	4.58051	7.97864	4.6691	0.15947	1.05271
2000	1150	66.6502	57.5069	0.215489	16.0188	1.25559	0.00826751	6.42123	0.18194	4.53793	7.93936	4.69135	0.160813	1.06231
2000	1149	66.0541	57.5562	0.217245	15.9908	1.26003	0.00834213	6.44023	0.183582	4.49574	7.90035	4.71342	0.162153	1.07189
2000	1148	65.4692	57.6053	0.218998	15.9627	1.26445	0.00841665	6.45908	0.185222	4.45395	7.8616	4.73534	0.16349	1.08147
2000	1147	64.8952	57.6542	0.220748	15.9345	1.26886	0.0084911	6.47778	0.186861	4.41255	7.82312	4.75708	0.164824	1.09104
2000	1146	64.3318	57.7029	0.222494	15.9061	1.27325	0.00856547	6.49635	0.188497	4.37154	7.78489	4.77867	0.166156	1.10059
2000	1145	63.7786	57.7513	0.224236	15.8777	1.27763	0.00863976	6.51477	0.190132	4.3309	7.74693	4.80009	0.167484	1.11014
2000	1144	63.2355	57.7996	0.225976	15.8492	1.28199	0.00871397	6.53306	0.191765	4.29064	7.70922	4.82135	0.168809	1.11967
2000	1143	62.702	57.8477	0.227711	15.8206	1.28634	0.0087881	6.55121	0.193396	4.25076	7.67177	4.84245	0.170132	1.1292
2000	1142	62.1781	57.8955	0.229444	15.7919	1.29067	0.00886215	6.56922	0.195026	4.21124	7.63457	4.86339	0.171452	1.13871
2000	1141	61.6633	57.9432	0.231173	15.7631	1.29498	0.00893613	6.5871	0.196654	4.17208	7.59761	4.88418	0.172768	1.14822
2000	1140	61.1575	57.9907	0.2329	15.7342	1.29928	0.00901004	6.60485	0.198281	4.13329	7.56091	4.90481	0.174082	1.15771
2000	1139	60.6604	58.0379	0.234623	15.7052	1.30357	0.00908387	6.62248	0.199905	4.09484	7.52444	4.92529	0.175394	1.1672
2000	1138	60.1719	58.085	0.236343	15.6762	1.30784	0.00915763	6.63997	0.201529	4.05675	7.48822	4.94561	0.176702	1.17668
2000	1137	59.6915	58.1319	0.238059	15.647	1.3121	0.00923132	6.65734	0.20315	4.01901	7.45224	4.96579	0.178008	1.18615
2000	1136	59.2193	58.1786	0.239773	15.6178	1.31635	0.00930494	6.67458	0.20477	3.98161	7.4165	4.98581	0.179311	1.19561
2000	1135	58.7549	58.2251	0.241484	15.5885	1.32058	0.00937849	6.6917	0.206389	3.94455	7.38099	5.00569	0.180611	1.20506
2000	1134	58.2981	58.2714	0.243192	15.5591	1.3248	0.00945197	6.7087	0.208006	3.90783	7.34572	5.02542	0.181908	1.2145
2000	1133	57.8488	58.3175	0.244897	15.5296	1.32901	0.00952538	6.72558	0.209622	3.87143	7.31068	5.045	0.183203	1.22393
2000	1132	57.4067	58.3635	0.246599	15.5	1.33321	0.00959873	6.74235	0.211236	3.83537	7.27586	5.06444	0.184495	1.23336
2000	1131	56.9718	58.4092	0.248299	15.4704	1.33739	0.00967201	6.75899	0.212848	3.79963	7.24128	5.08374	0.185785	1.24277
2000	1130	56.5437	58.4548	0.249996	15.4407	1.34157	0.00974523	6.77552	0.21446	3.76421	7.20692	5.10289	0.187072	1.25218
2000	1129	56.1224	58.5001	0.25169	15.4109	1.34573	0.00981839	6.79194	0.21607	3.7291	7.17278	5.1219	0.188356	1.26158
2000	1128	55.7077	58.5453	0.253381	15.381	1.34988	0.00989148	6.80825	0.217678	3.69432	7.13886	5.14078	0.189638	1.27097
2000	1127	55.2994	58.5904	0.25507	15.3511	1.35402	0.00996451	6.82444	0.219285	3.65984	7.10517	5.15951	0.190917	1.28036
2000	1126	54.8974	58.6352	0.256756	15.321	1.35815	0.0100375	6.84052	0.220891	3.62566	7.07169	5.17811	0.192194	1.28973
2000	1125	54.5015	58.6799	0.258439	15.291	1.36227	0.0101104	6.8565	0.222496	3.59179	7.03842	5.19657	0.193468	1.2991
2000	1124	54.1116	58.7244	0.26012	15.2608	1.36638	0.0101833	6.87237	0.224099	3.55822	7.00537	5.21489	0.194739	1.30846
2000	1123	53.7275	58.7687	0.261799	15.2306	1.37048	0.0102561	6.88813	0.225701	3.52495	6.97253	5.23309	0.196008	1.31782
2000	1122	53.3491	58.8128	0.263475	15.2003	1.37457	0.0103288	6.90379	0.227302	3.49197	6.9399	5.25115	0.197275	1.32716
2000	1121	52.9763	58.8568	0.265149	15.1699	1.37865	0.0104015	6.91934	0.228902	3.45928	6.90748	5.26907	0.198539	1.3365
2000	1120	52.6089	58.9006	0.26682	15.1395	1.38273	0.0104741	6.9348	0.2305	3.42688	6.87526	5.28687	0.199801	1.34584
2000	1119	52.2468	58.9442	0.268489	15.109	1.38679	0.0105467	6.95015	0.232097	3.39476	6.84325	5.30454	0.201061	1.35516
2000	1118	51.89	58.9876	0.270156	15.0784	1.39084	0.0106192	6.9654	0.233693	3.36292	6.81144	5.32208	0.202318	1.36448
2000	1117	51.5382	59.0309	0.271821	15.0478	1.39489	0.0106917	6.98055	0.235288	3.33136	6.77983	5.33949	0.203572	1.37379
2000	1116	51.1914	59.074	0.273483	15.0171	1.39893	0.0107641	6.9956	0.236882	3.30007	6.74842	5.35678	0.204825	1.3831
2000	1115	50.8495	59.117	0.275144	14.9864	1.40296	0.0108365	7.01055	0.238475	3.26906	6.71721	5.37394	0.206075	1.3924
2000	1114	50.5123	59.1598	0.276802	14.9556	1.40698	0.0109089	7.02541	0.240067	3.23831	6.68619	5.39097	0.207322	1.4017
2000	1113	50.1798	59.2024	0.278458	14.9247	1.41099	0.0109811	7.04017	0.241658	3.20783	6.65537	5.40789	0.208568	1.41098
2000	1112	49.8518	59.2449	0.280112	14.8938	1.41499	0.0110534	7.05484	0.243248	3.17761	6.62474	5.42468	0.209811	1.42027
2000	1111	49.5283	59.2872	0.281764	14.8628	1.41899	0.0111256	7.06942	0.244837	3.14766	6.59429	5.44135	0.211052	1.42954
2000	1110	49.2092	59.3293	0.283414	14.8318	1.42298	0.0111977	7.0839	0.246424	3.11796	6.56404	5.4579	0.212291	1.43882
2000	1109	48.8943	59.3713	0.285062	14.8007	1.42697	0.0112698	7.09829	0.248011	3.08851	6.53398	5.47433	0.213527	1.44808
2000	1108	48.5836	59.4131	0.286708	14.7695	1.43094	0.0113419	7.11258	0.249597	3.05932	6.5041	5.49064	0.214761	1.45734
2000	1107	48.277	59.4548	0.288352	14.7383	1.43491	0.0114139	7.12679	0.251182	3.03038	6.47441	5.50684	0.215993	1.4666
2000	1106	47.9745	59.4963	0.289995	14.7071	1.43887	0.0114859	7.14091	0.252767	3.00168	6.44489	5.52292	0.217223	1.47585
2000	1105	47.6758	59.5377	0.291635	14.6758	1.44283	0.0115579	7.15494	0.25435	2.97323	6.41556	5.53888	0.218451	1.48509
2000	1104	47.381	59.5789	0.293274	14.6444	1.44678	0.0116298	7.16888	0.255933	2.94502	6.38641	5.55474	0.219677	1.49433
2000	1103	47.09	59.6199	0.294911	14.613	1.45072	0.0117017	7.18273	0.257515	2.91705	6.35744	5.57047	0.2209	1.50357
2000	1102	46.8026	59.6609	0.296547	14.5816	1.45466	0.0117735	7.1965	0.259096	2.88932	6.32865	5.5861	0.222122	1.5128
2000	1101	46.5189	59.7016	0.298181	14.5501	1.45859	0.0118453	7.21018	0.260676	2.86182	6.30003	5.60161	0.223341	1.52203
2000	1100	46.2387	59.7422	0.299813	14.5186	1.46251	0.0119171	7.22377	0.262255	2.83455	6.27158	5.61701	0.224558	1.53125
2000	1099	45.962	59.7827	0.301443	14.487	1.46643	0.0119888	7.23728	0.263834	2.80751	6.2433	5.6323	0.225773	1.54047
2000	1098	45.6888	59.823	0.303072	14.4553	1.47035	0.0120606	7.25071	0.265412	2.7807	6.2152	5.64749	0.226987	1.54968
2000	1097	45.4188	59.8632	0.304699	14.4237	1.47425	0.0121322	7.26405	0.266989	2.75411	6.18727	5.66256	0.228198	1.55889
2000	1096	45.1522	59.9032	0.306325	14.3919	1.47816	0.0122039	7.2773	0.268566	2.72774	6.1595	5.67753	0.229407	1.5681
2000	1095	44.8887	59.9431	0.307949	14.3602	1.48205	0.0122755	7.29048	0.270142	2.7016	6.1319	5.69239	0.230614	1.5773
2000	1094	44.6285	59.9829	0.309572	14.3284	1.48595	0.0123471	7.30357	0.271718	2.67567	6.10447	5.70715	0.231819	1.5865
2000	1093	44.3713	60.0225	0.311194	14.2965	1.48983	0.0124187	7.31658	0.273293	2.64996	6.0772	5.7218	0.233023	1.59569
2000	1092	44.1172	60.0619	0.312813	14.2646	1.49371	0.0124902	7.32951	0.274867	2.62446	6.05009	5.73635	0.234224	1.60488
2000	1091	43.866	60.1013	0.314432	14.2327	1.49759	0.0125617	7.34236	0.276441	2.59917	6.02315	5.7508	0.235423	1.61407
2000	1090	43.6178	60.1405	0.316049	14.2008	1.50146	0.0126332	7.35513	0.278014	2.5741	5.99637	5.76514	0.236621	1.62326
2000	1089	43.3724	60.1795	0.317665	14.1688	1.50533	0.0127047	7.36782	0.279587	2.54923	5.96974	5.77938	0.237816	1.63244
2000	1088	43.1299	60.2185	0.31928	14.1367	1.50919	0.0127761	7.38043	0.281159	2.52456	5.94327	5.79353	0.23901	1.64162
2000	1087	42.8901	60.2572	0.320893	14.1046	1.51305	0.0128475	7.39296	0.282731	2.5001	5.91696	5.80757	0.240202	1.6508
2000	1086	42.6531	60.2959	0.322505	14.0725	1.5169	0.0129189	7.40542	0.284302	2.47584	5.8908	5.82151	0.241392	1.65997
2000	1085	42.4187	60.3344	0.324116	14.0404	1.52075	0.0129903	7.41779	0.285873	2.45177	5.8648	5.83536	0.24258	1.66915
2000	1084	42.1869	60.3728	0.325726	14.0082	1.52459	0.0130617	7.43009	0.287443	2.42791	5.83895	5.84911	0.243766	1.67832
2000	1083	41.9577	60.4111	0.327334	13.976	1.52843	0.013133	7.4423	0.289013	2.40423	5.81325	5.86276	0.244951	1.68748
2000	1082	41.7311	60.4492	0.328942	13.9438	1.53227	0.0132043	7.45444	0.290583	2.38076	5.78771	5.87631	0.246134	1.69665
2000	1081	41.5069	60.4872	0.330548	13.9115	1.5361	0.0132757	7.46651	0.292152	2.35747	5.76231	5.88978	0.247315	1.70581
2000	1080	41.2852	60.5251	0.332153	13.8792	1.53993	0.013347	7.4785	0.293721	2.33437	5.73706	5.90314	0.248494	1.71497
2000	1079	41.0659	60.5629	0.333757	13.8469	1.54375	0.0134182	7.49041	0.29529	2.31146	5.71195	5.91642	0.249671	1.72413
2000	1078	40.8489	60.6005	0.33536	13.8145	1.54757	0.0134895	7.50224	0.296859	2.28873	5.68699	5.9296	0.250847	1.73329
2000	1077	40.6343	60.638	0.336962	13.7821	1.55138	0.0135608	7.514	0.298427	2.26619	5.66218	5.94269	0.252021	1.74244
2000	1076	40.4219	60.6754	0.338563	13.7497	1.5552	0.013632	7.52568	0.299995	2.24383	5.63751	5.95569	0.253193	1.7516
2000	1075	40.2118	60.7127	0.340163	13.7172	1.559	0.0137032	7.53729	0.301562	2.22166	5.61298	5.96859	0.254364	1.76075
2000	1074	40.0039	60.7499	0.341763	13.6848	1.56281	0.0137745	7.54882	0.30313	2.19965	5.58859	5.98141	0.255533	1.7699
2000	1073	39.7981	60.7869	0.343361	13.6523	1.56661	0.0138457	7.56028	0.304697	2.17783	5.56435	5.99414	0.2567	1.77905
2000	1072	39.5945	60.8238	0.344958	13.6197	1.5704	0.0139169	7.57166	0.306264	2.15618	5.54024	6.00678	0.257865	1.7882
2000	1071	39.3929	60.8606	0.346554	13.5872	1.5742	0.0139881	7.58297	0.307831	2.13471	5.51627	6.01934	0.259029	1.79735
2000	1070	39.1934	60.8973	0.34815	13.5546	1.57799	0.0140593	7.5942	0.309397	2.1134	5.49244	6.0318	0.260191	1.8065
2000	1069	38.996	60.9338	0.349745	13.522	1.58177	0.0141305	7.60536	0.310964	2.09227	5.46874	6.04418	0.261352	1.81565
2000	1068	38.8005	60.9703	0.351338	13.4894	1.58555	0.0142016	7.61644	0.31253	2.0713	5.44518	6.05648	0.262511	1.82479
2000	1067	38.607	61.0066	0.352931	13.4567	1.58933	0.0142728	7.62745	0.314097	2.05051	5.42175	6.06869	0.263668	1.83394
2000	1066	38.4155	61.0429	0.354524	13.4241	1.59311	0.014344	7.63838	0.315663	2.02987	5.39845	6.08081	0.264824	1.84308
2000	1065	38.2258	61.079	0.356115	13.3914	1.59688	0.0144152	7.64924	0.317229	2.00941	5.37529	6.09286	0.265978	1.85223
2000	1064	38.038	61.115	0.357706	13.3587	1.60065	0.0144863	7.66003	0.318796	1.9891	5.35226	6.10482	0.267131	1.86137
2000	1063	37.852	61.1509	0.359296	13.326	1.60442	0.0145575	7.67074	0.320362	1.96895	5.32935	6.11669	0.268282	1.87052
2000	1062	37.6679	61.1867	0.360885	13.2932	1.60818	0.0146287	7.68137	0.321928	1.94897	5.30658	6.12849	0.269432	1.87966
2000	1061	37.4855	61.2223	0.362474	13.2605	1.61194	0.0146999	7.69194	0.323494	1.92914	5.28393	6.14021	0.27058	1.88881
2000	1060	37.3049	61.2579	0.364062	13.2277	1.61569	0.014771	7.70243	0.325061	1.90946	5.26141	6.15184	0.271726	1.89795
2000	1059	37.126	61.2934	0.365649	13.1949	1.61944	0.0148422	7.71284	0.326627	1.88995	5.23901	6.1634	0.272871	1.9071
2000	1058	36.9488	61.3288	0.367236	13.1621	1.62319	0.0149134	7.72318	0.328193	1.87058	5.21674	6.17488	0.274015	1.91625
2000	1057	36.7733	61.364	0.368822	13.1292	1.62694	0.0149846	7.73345	0.32976	1.85137	5.1946	6.18628	0.275157	1.92539
2000	1056	36.5992	61.3994	0.370397	13.0964	1.63065	0.0149618	7.74346	0.331329	1.83228	5.17257	6.19763	0.276299	1.93455
2000	1055	36.4261	61.4355	0.371937	13.0636	1.63428	0.0146771	7.75291	0.332903	1.81327	5.15065	6.20901	0.277444	1.94374
2000	1054	36.2546	61.4716	0.373473	13.0308	1.6379	0.0143928	7.76225	0.334478	1.79442	5.12885	6.22031	0.278589	1.95294
2000	1053	36.0847	61.5075	0.375006	12.998	1.64151	0.0141086	7.7715	0.336053	1.7757	5.10717	6.23154	0.279731	1.96213
2000	1052	35.9163	61.5433	0.376537	12.9652	1.64511	0.0138245	7.78067	0.337628	1.75714	5.08561	6.2427	0.280873	1.97133
2000	1051	35.7495	61.5791	0.378064	12.9324	1.64871	0.0135406	7.78975	0.339204	1.73872	5.06417	6.25378	0.282013	1.98053
2000	1050	35.5841	61.6148	0.379589	12.8996	1.65231	0.0132568	7.79874	0.34078	1.72044	5.04284	6.26479	0.283152	1.98973
2000	1049	35.4203	61.6504	0.381111	12.8667	1.65589	0.012973	7.80763	0.342356	1.7023	5.02164	6.27573	0.284289	1.99894
2000	1048	35.2579	61.686	0.38263	12.8339	1.65948	0.0126893	7.81644	0.343933	1.68431	5.00054	6.2866	0.285426	2.00815
2000	1047	35.0969	61.7214	0.384145	12.801	1.66305	0.0124055	7.82516	0.34551	1.66645	4.97956	6.2974	0.286561	2.01736
2000	1046	34.9374	61.7568	0.385658	12.7681	1.66662	0.0121217	7.83378	0.347088	1.64874	4.95869	6.30813	0.287695	2.02657
2000	1045	34.7792	61.7921	0.387166	12.7352	1.67018	0.0118379	7.84232	0.348666	1.63116	4.93794	6.31879	0.288827	2.03578
2000	1044	34.6225	61.8274	0.388672	12.7023	1.67374	0.0115541	7.85075	0.350245	1.61372	4.9173	6.32938	0.289959	2.045
2000	1043	34.4671	61.8626	0.390173	12.6694	1.67729	0.0112701	7.8591	0.351824	1.59641	4.89677	6.3399	0.291089	2.05422
2000	1042	34.313	61.8977	0.39167	12.6365	1.68083	0.0109861	7.86734	0.353404	1.57923	4.87634	6.35036	0.292218	2.06344
2000	1041	34.1602	61.9327	0.393164	12.6036	1.68436	0.010702	7.87549	0.354985	1.56219	4.85603	6.36075	0.293346	2.07267
2000	1040	34.0088	61.9677	0.394652	12.5706	1.68789	0.0104178	7.88354	0.356566	1.54528	4.83583	6.37108	0.294473	2.0819
2000	1039	33.8586	62.0027	0.396137	12.5377	1.69141	0.0101334	7.89149	0.358147	1.5285	4.81573	6.38134	0.295598	2.09114
2000	1038	33.7096	62.0375	0.397616	12.5048	1.69492	0.00984903	7.89934	0.35973	1.51185	4.79574	6.39154	0.296723	2.10038
2000	1037	33.5619	62.0724	0.39909	12.4718	1.69842	0.00956455	7.90709	0.361313	1.49532	4.77585	6.40168	0.297847	2.10962
2000	1036	33.4155	62.1071	0.400559	12.4389	1.70192	0.00928001	7.91473	0.362896	1.47893	4.75607	6.41175	0.298969	2.11887
2000	1035	33.2702	62.1419	0.402022	12.4059	1.7054	0.00899546	7.92226	0.364481	1.46266	4.7364	6.42176	0.300091	2.12812
2000	1034	33.1261	62.1765	0.403479	12.373	1.70888	0.00871093	7.92969	0.366066	1.44651	4.71682	6.43171	0.301211	2.13738
2000	1033	32.9832	62.2112	0.404929	12.34	1.71235	0.00842647	7.93701	0.367652	1.43049	4.69735	6.44161	0.30233	2.14664
2000	1032	32.8414	62.2458	0.406373	12.3071	1.7158	0.00814214	7.94422	0.36924	1.41459	4.67798	6.45144	0.303449	2.1559
2000	1031	32.7008	62.2803	0.407809	12.2741	1.71925	0.00785802	7.95131	0.370827	1.39882	4.65872	6.46121	0.304567	2.16518
2000	1030	32.5613	62.3149	0.409238	12.2412	1.72269	0.00757419	7.95829	0.372416	1.38316	4.63955	6.47092	0.305683	2.17445
2000	1029	32.4229	62.3494	0.410659	12.2082	1.72611	0.00729076	7.96516	0.374006	1.36763	4.62048	6.48058	0.306799	2.18374
2000	1028	32.2855	62.3838	0.412071	12.1752	1.72953	0.00700784	7.9719	0.375597	1.35221	4.6015	6.49018	0.307914	2.19302
2000	1027	32.1493	62.4183	0.413474	12.1423	1.73293	0.00672556	7.97852	0.377189	1.33692	4.58263	6.49973	0.309028	2.20232
2000	1026	32.0141	62.4527	0.414868	12.1093	1.73632	0.00644408	7.98502	0.378782	1.32174	4.56385	6.50922	0.310141	2.21162
2000	1025	31.8799	62.4871	0.416251	12.0764	1.7397	0.00616357	7.9914	0.380376	1.30667	4.54517	6.51865	0.311254	2.22093
2000	1024	31.7467	62.5215	0.417624	12.0434	1.74307	0.00588421	7.99764	0.381971	1.29173	4.52658	6.52804	0.312365	2.23024
2000	1023	31.6146	62.5558	0.418985	12.0104	1.74642	0.00560622	8.00376	0.383568	1.2769	4.50809	6.53737	0.313476	2.23956
2000	1022	31.4835	62.5902	0.420334	11.9775	1.74976	0.00532982	8.00974	0.385166	1.26218	4.48969	6.54664	0.314587	2.24889
2000	1021	31.3533	62.6246	0.421671	11.9445	1.75308	0.00505527	8.01559	0.386765	1.24758	4.47138	6.55587	0.315696	2.25823
2000	1020	31.2241	62.6589	0.422994	11.9116	1.75639	0.00478285	8.02129	0.388366	1.23308	4.45316	6.56505	0.316805	2.26758
2000	1019	31.0958	62.6933	0.424302	11.8786	1.75968	0.00451286	8.02686	0.389968	1.21871	4.43504	6.57417	0.317914	2.27693
2000	1018	30.9685	62.7277	0.425596	11.8457	1.76296	0.00424564	8.03229	0.391571	1.20444	4.417	6.58325	0.319022	2.28629
2000	1017	30.842	62.762	0.426873	11.8127	1.76622	0.00398154	8.03756	0.393176	1.19028	4.39906	6.59228	0.320129	2.29566
2000	1016	30.7165	62.7964	0.428133	11.7798	1.76947	0.00372095	8.04269	0.394783	1.17623	4.3812	6.60127	0.321236	2.30504
2000	1015	30.5919	62.8309	0.429375	11.7468	1.7727	0.00346428	8.04766	0.396391	1.1623	4.36343	6.6102	0.322343	2.31443
2000	1014	30.4682	62.8653	0.430598	11.7139	1.7759	0.00321197	8.05247	0.398001	1.14847	4.34575	6.61909	0.323449	2.32383
2000	1013	30.3453	62.8998	0.431801	11.681	1.77909	0.0029645	8.05713	0.399612	1.13474	4.32815	6.62794	0.324554	2.33324
2000	1012	30.2232	62.9343	0.432983	11.648	1.78226	0.00272237	8.06162	0.401226	1.12113	4.31064	6.63674	0.325659	2.34267
2000	1011	30.102	62.9689	0.434142	11.6151	1.78541	0.00248611	8.06594	0.402841	1.10762	4.29322	6.6455	0.326764	2.3521
2000	1010	29.9817	63.0035	0.435278	11.5822	1.78854	0.00225628	8.07009	0.404459	1.09422	4.27587	6.65422	0.327869	2.36154
2000	1009	29.8621	63.0381	0.436388	11.5492	1.79165	0.00203348	8.07406	0.406078	1.08093	4.25861	6.66289	0.328974	2.37099
2000	1008	29.7434	63.0729	0.437472	11.5163	1.79473	0.00181832	8.07785	0.407699	1.06774	4.24144	6.67153	0.330078	2.38046
2000	1007	29.6254	63.1076	0.438527	11.4834	1.79779	0.00161146	8.08146	0.409323	1.05466	4.22434	6.68012	0.331182	2.38994
2000	1006	29.5082	63.1425	0.439552	11.4505	1.80082	0.00141358	8.08488	0.410948	1.04168	4.20733	6.68868	0.332286	2.39943
2000	1005	29.3918	63.1774	0.440546	11.4176	1.80383	0.00122537	8.08809	0.412576	1.0288	4.1904	6.6972	0.33339	2.40894
2000	1004	29.2761	63.2124	0.441506	11.3847	1.80681	0.00104758	8.09111	0.414207	1.01603	4.17354	6.70568	0.334494	2.41846
2000	1003	29.1611	63.2475	0.44243	11.3518	1.80976	0.000880942	8.09392	0.41584	1.00336	4.15677	6.71412	0.335599	2.42799
2000	1002	29.0469	63.2828	0.443315	11.3189	1.81268	0.000726246	8.0965	0.417475	0.990798	4.14007	6.72254	0.336703	2.43754
2000	1001	28.9333	63.3181	0.444158	11.286	1.81557	0.000584281	8.09886	0.419113	0.978336	4.12345	6.73092	0.337808	2.44711
2000	1000	28.8205	63.3536	0.444955	11.2531	1.81843	0.000455855	8.10097	0.420754	0.965977	4.10691	6.73927	0.338913	2.45669
2000	999	28.7083	63.3892	0.4457	11.2202	1.82124	0.000341784	8.10281	0.422399	0.953721	4.09044	6.74759	0.340019	2.46629
2000	998	28.5967	63.4251	0.446385	11.1873	1.82401	0.000242888	8.10436	0.424047	0.941569	4.07404	6.75588	0.341125	2.47591
2000	997	28.4858	63.4612	0.446999	11.1545	1.82673	0.000159978	8.10557	0.425699	0.92952	4.05772	6.76416	0.342233	2.48556
2000	996	28.3753	63.4977	0.447518	11.1216	1.82937	9.38387e-05	8.10635	0.427356	0.917578	4.04146	6.77243	0.343343	2.49523
2000	995	28.2652	63.5348	0.447894	11.0887	1.83191	4.51824e-05	8.10651	0.42902	0.905746	4.02527	6.78072	0.344456	2.50495
2000	994	28.1551	63.5732	0.447989	11.0558	1.83424	1.45304e-05	8.10549	0.430698	0.894037	4.00911	6.78909	0.345577	2.51475
2000	993	28.0513	63.6022	0.449936	11.023	1.83796	0	8.11191	0.432293	0.882239	3.99329	6.79652	0.346636	2.52406
2000	992	27.9221	63.6756	0.443024	10.9899	1.83506	0	8.08251	0.434292	0.871432	3.97635	6.80814	0.34799	2.53573
2000	991	27.7936	63.7497	0.436012	10.9567	1.83201	0	8.05238	0.436299	0.860761	3.95949	6.81976	0.349349	2.54745
2000	990	27.6664	63.8236	0.429088	10.9236	1.82895	0	8.02232	0.438306	0.850205	3.94273	6.83129	0.350705	2.55916
2000	989	27.5404	63.8973	0.422251	10.8905	1.82589	0	7.99231	0.440311	0.839763	3.92608	6.84274	0.352057	2.57087
2000	988	27.4156	63.9707	0.415499	10.8573	1.82282	0	7.96235	0.442315	0.829432	3.90953	6.8541	0.353407	2.58257
2000	987	27.2921	64.0438	0.408831	10.8241	1.81975	0	7.93245	0.444318	0.819212	3.89309	6.86537	0.354754	2.59427
2000	986	27.1696	64.1167	0.402247	10.791	1.81667	0	7.9026	0.44632	0.809102	3.87674	6.87656	0.356098	2.60596
2000	985	27.0483	64.1894	0.395746	10.7578	1.81358	0	7.87281	0.448321	0.799099	3.8605	6.88766	0.357439	2.61764
2000	984	26.9282	64.2619	0.389326	10.7246	1.81048	0	7.84306	0.450322	0.789203	3.84435	6.89868	0.358778	2.62932
2000	983	26.8092	64.3341	0.382987	10.6914	1.80738	0	7.81336	0.452321	0.779413	3.8283	6.90962	0.360114	2.641
2000	982	26.6912	64.4061	0.376728	10.6583	1.80427	0	7.78371	0.454319	0.769727	3.81235	6.92048	0.361447	2.65267
2000	981	26.5744	64.4778	0.370548	10.6251	1.80115	0	7.75411	0.456317	0.760144	3.7965	6.93125	0.362777	2.66433
2000	980	26.4586	64.5494	0.364446	10.5919	1.79802	0	7.72455	0.458314	0.750662	3.78074	6.94195	0.364104	2.67599
2000	979	26.3439	64.6207	0.358421	10.5587	1.79488	0	7.69503	0.46031	0.741282	3.76508	6.95256	0.365429	2.68764
2000	978	26.2302	64.6918	0.352472	10.5255	1.79174	0	7.66555	0.462305	0.732001	3.7495	6.9631	0.366751	2.69929
2000	977	26.1176	64.7627	0.346599	10.4923	1.78858	0	7.63612	0.464299	0.722818	3.73402	6.97356	0.36807	2.71093
2000	976	26.0059	64.8334	0.3408	10.4591	1.78542	0	7.60673	0.466292	0.713733	3.71864	6.98394	0.369387	2.72257
2000	975	25.8952	64.9038	0.335076	10.426	1.78225	0	7.57738	0.468285	0.704744	3.70334	6.99424	0.370701	2.73421
2000	974	25.7856	64.9741	0.329424	10.3928	1.77906	0	7.54806	0.470277	0.69585	3.68813	7.00447	0.372012	2.74584
2000	973	25.6768	65.0442	0.323844	10.3596	1.77587	0	7.51878	0.472268	0.68705	3.67301	7.01462	0.373321	2.75746
2000	972	25.5691	65.114	0.318336	10.3264	1.77267	0	7.48954	0.474258	0.678343	3.65798	7.0247	0.374627	2.76908
2000	971	25.4623	65.1837	0.312899	10.2933	1.76946	0	7.46033	0.476248	0.669728	3.64304	7.03471	0.37593	2.7807
2000	970	25.3564	65.2532	0.307532	10.2601	1.76623	0	7.43116	0.478237	0.661205	3.62818	7.04464	0.377231	2.79232
2000	969	25.2514	65.3224	0.302234	10.2269	1.763	0	7.40202	0.480225	0.652771	3.61341	7.0545	0.378529	2.80392
2000	968	25.1473	65.3915	0.297004	10.1938	1.75976	0	7.37291	0.482213	0.644426	3.59872	7.06429	0.379825	2.81553
2000	967	25.0441	65.4604	0.291842	10.1607	1.7565	0	7.34384	0.4842	0.63617	3.58411	7.074	0.381118	2.82713
2000	966	24.9418	65.5291	0.286748	10.1275	1.75323	0	7.31479	0.486186	0.628001	3.56959	7.08365	0.382409	2.83873
2000	965	24.8403	65.5977	0.281719	10.0944	1.74995	0	7.28577	0.488172	0.619918	3.55514	7.09323	0.383696	2.85032
2000	964	24.7397	65.666	0.276757	10.0613	1.74666	0	7.25678	0.490157	0.61192	3.54078	7.10273	0.384982	2.86191
2000	963	24.64	65.7342	0.271859	10.0282	1.74336	0	7.22782	0.492141	0.604007	3.5265	7.11217	0.386265	2.8735
2000	962	24.5411	65.8022	0.267026	9.99509	1.74005	0	7.19889	0.494125	0.596178	3.5123	7.12154	0.387545	2.88508
2000	961	24.443	65.87	0.262256	9.96201	1.73672	0	7.16998	0.496108	0.588431	3.49818	7.13085	0.388823	2.89666
2000	960	24.3457	65.9376	0.25755	9.92894	1.73338	0	7.1411	0.498091	0.580767	3.48413	7.14009	0.390098	2.90824
2000	959	24.2492	66.0051	0.252905	9.89588	1.73003	0	7.11224	0.500073	0.573183	3.47016	7.14926	0.391371	2.91981
2000	958	24.1535	66.0724	0.248323	9.86283	1.72666	0	7.0834	0.502054	0.56568	3.45627	7.15836	0.392642	2.93138
2000	957	24.0586	66.1395	0.243802	9.8298	1.72328	0	7.05459	0.504035	0.558256	3.44245	7.1674	0.39391	2.94294
2000	956	23.9644	66.2065	0.239342	9.79678	1.71989	0	7.0258	0.506015	0.550912	3.42871	7.17638	0.395175	2.9545
2000	955	23.871	66.2733	0.234941	9.76378	1.71649	0	6.99703	0.507995	0.543645	3.41504	7.18529	0.396438	2.96606
2000	954	23.7784	66.3399	0.2306	9.73079	1.71307	0	6.96828	0.509974	0.536455	3.40145	7.19414	0.397698	2.97762
2000	953	23.6865	66.4064	0.226317	9.69782	1.70963	0	6.93955	0.511952	0.529341	3.38792	7.20292	0.398957	2.98917
2000	952	23.5953	66.4727	0.222093	9.66486	1.70619	0	6.91084	0.513931	0.522304	3.37447	7.21165	0.400212	3.00072
2000	951	23.5049	66.5389	0.217927	9.63192	1.70273	0	6.88215	0.515908	0.515341	3.36109	7.22031	0.401465	3.01227
2000	950	23.4151	66.6049	0.213817	9.599	1.69925	0	6.85347	0.517885	0.508452	3.34778	7.22891	0.402716	3.02381
2000	949	23.3261	66.6708	0.209764	9.56609	1.69576	0	6.82482	0.519862	0.501637	3.33453	7.23745	0.403965	3.03535
2000	948	23.2378	66.7365	0.205767	9.5332	1.69225	0	6.79618	0.521838	0.494895	3.32136	7.24593	0.40521	3.04689
2000	947	23.1501	66.802	0.201825	9.50033	1.68873	0	6.76755	0.523813	0.488225	3.30826	7.25435	0.406454	3.05842
2000	946	23.0632	66.8675	0.197939	9.46748	1.68519	0	6.73894	0.525788	0.481627	3.29522	7.26271	0.407695	3.06996
2000	945	22.9769	66.9327	0.194106	9.43465	1.68164	0	6.71035	0.527763	0.475099	3.28225	7.27101	0.408934	3.08148
2000	944	22.8913	66.9978	0.190328	9.40184	1.67807	0	6.68176	0.529737	0.468642	3.26934	7.27925	0.41017	3.09301
2000	943	22.8063	67.0628	0.186602	9.36905	1.67449	0	6.6532	0.53171	0.462254	3.2565	7.28744	0.411404	3.10453
2000	942	22.722	67.1277	0.18293	9.33628	1.67089	0	6.62464	0.533683	0.455935	3.24372	7.29556	0.412636	3.11605
2000	941	22.6383	67.1924	0.17931	9.30353	1.66727	0	6.5961	0.535656	0.449684	3.23101	7.30364	0.413865	3.12757
2000	940	22.5553	67.2569	0.175741	9.2708	1.66364	0	6.56756	0.537628	0.443501	3.21836	7.31165	0.415092	3.13909
2000	939	22.4729	67.3214	0.172224	9.2381	1.65999	0	6.53904	0.5396	0.437385	3.20578	7.31961	0.416316	3.1506
2000	938	22.3911	67.3857	0.168758	9.20542	1.65633	0	6.51053	0.541571	0.431336	3.19325	7.32751	0.417538	3.16211
2000	937	22.3099	67.4498	0.165342	9.17276	1.65264	0	6.48203	0.543542	0.425352	3.18079	7.33536	0.418758	3.17361
2000	936	22.2293	67.5138	0.161975	9.14012	1.64894	0	6.45354	0.545512	0.419434	3.16838	7.34316	0.419975	3.18512
2000	935	22.1493	67.5777	0.158658	9.10751	1.64522	0	6.42506	0.547481	0.413581	3.15604	7.3509	0.42119	3.19662
2000	934	22.07	67.6415	0.15539	9.07493	1.64149	0	6.39658	0.549451	0.407792	3.14376	7.35858	0.422402	3.20812
2000	933	21.9912	67.7052	0.152171	9.04237	1.63774	0	6.36812	0.551419	0.402066	3.13153	7.36621	0.423613	3.21961
2000	932	21.9129	67.7687	0.148999	9.00983	1.63396	0	6.33966	0.553388	0.396404	3.11936	7.37379	0.424821	3.2311
2000	931	21.8353	67.8321	0.145875	8.97732	1.63017	0	6.31121	0.555356	0.390804	3.10725	7.38132	0.426026	3.24259
2000	930	21.7582	67.8953	0.142798	8.94484	1.62637	0	6.28276	0.557323	0.385267	3.0952	7.3888	0.427229	3.25408
2000	929	21.6817	67.9585	0.139768	8.91238	1.62254	0	6.25432	0.55929	0.379791	3.0832	7.39622	0.42843	3.26556
2000	928	21.6057	68.0215	0.136783	8.87995	1.61869	0	6.22589	0.561256	0.374376	3.07126	7.40359	0.429628	3.27704
2000	927	21.5303	68.0844	0.133845	8.84755	1.61483	0	6.19746	0.563222	0.369021	3.05937	7.41091	0.430824	3.28852
2000	926	21.4554	68.1472	0.130951	8.81518	1.61095	0	6.16904	0.565187	0.363727	3.04754	7.41818	0.432018	3.3
2000	925	21.3811	68.2099	0.128103	8.78283	1.60704	0	6.14062	0.567152	0.358492	3.03576	7.4254	0.43321	3.31147
2000	924	21.3073	68.2725	0.125299	8.75051	1.60312	0	6.11221	0.569117	0.353316	3.02404	7.43257	0.434399	3.32294
2000	923	21.234	68.3349	0.122539	8.71823	1.59918	0	6.0838	0.571081	0.348199	3.01236	7.43969	0.435585	3.33441
2000	922	21.1613	68.3973	0.119822	8.68597	1.59522	0	6.0554	0.573044	0.34314	3.00074	7.44676	0.436769	3.34587
2000	921	21.089	68.4595	0.117149	8.65374	1.59124	0	6.02699	0.575007	0.338139	2.98917	7.45379	0.437951	3.35733
2000	920	21.0173	68.5216	0.114518	8.62154	1.58724	0	5.99859	0.57697	0.333195	2.97765	7.46076	0.439131	3.36879
2000	919	20.9461	68.5836	0.11193	8.58938	1.58321	0	5.9702	0.578932	0.328308	2.96618	7.46769	0.440308	3.38025
2000	918	20.8754	68.6455	0.109384	8.55724	1.57917	0	5.9418	0.580893	0.323477	2.95476	7.47456	0.441483	3.3917
2000	917	20.8051	68.7073	0.106879	8.52514	1.57511	0	5.91341	0.582854	0.318702	2.94339	7.4814	0.442656	3.40315
2000	916	20.7354	68.769	0.104415	8.49306	1.57102	0	5.88502	0.584814	0.313983	2.93207	7.48818	0.443826	3.41459
2000	915	20.6661	68.8306	0.101992	8.46102	1.56692	0	5.85663	0.586774	0.309318	2.92079	7.49492	0.444993	3.42604
2000	914	20.5974	68.8921	0.0996099	8.42902	1.56279	0	5.82824	0.588733	0.304709	2.90956	7.50161	0.446159	3.43748
2000	913	20.5291	68.9535	0.0972672	8.39704	1.55865	0	5.79986	0.590692	0.300153	2.89838	7.50825	0.447322	3.44891
2000	912	20.4612	69.0148	0.0949641	8.3651	1.55448	0	5.77147	0.59265	0.295651	2.88725	7.51485	0.448483	3.46035
2000	911	20.3939	69.0759	0.0927002	8.33319	1.55029	0	5.74309	0.594608	0.291203	2.87616	7.5214	0.449641	3.47178
2000	910	20.327	69.137	0.090475	8.30132	1.54608	0	5.71471	0.596565	0.286807	2.86511	7.52791	0.450797	3.4832
2000	909	20.2605	69.198	0.0882883	8.26948	1.54184	0	5.68633	0.598521	0.282465	2.85411	7.53437	0.45195	3.49463
2000	908	20.1945	69.2589	0.0861395	8.23768	1.53759	0	5.65795	0.600477	0.278174	2.84316	7.54078	0.453101	3.50605
2000	907	20.129	69.3197	0.0840285	8.20591	1.53331	0	5.62957	0.602432	0.273935	2.83224	7.54716	0.45425	3.51746
2000	906	20.0639	69.3804	0.0819546	8.17418	1.52901	0	5.60119	0.604387	0.269748	2.82137	7.55348	0.455396	3.52887
2000	905	19.9992	69.441	0.0799177	8.14248	1.52469	0	5.57281	0.606341	0.265612	2.81055	7.55977	0.45654	3.54028
2000	904	19.935	69.5015	0.0779173	8.11082	1.52034	0	5.54443	0.608294	0.261526	2.79976	7.56601	0.457681	3.55169
2000	903	19.8712	69.562	0.0759531	8.07919	1.51597	0	5.51605	0.610247	0.257491	2.78902	7.5722	0.45882	3.56309
2000	902	19.8079	69.6223	0.0740247	8.04761	1.51158	0	5.48767	0.612199	0.253505	2.77832	7.57836	0.459957	3.57449
2000	901	19.7449	69.6825	0.0721317	8.01605	1.50717	0	5.45929	0.61415	0.249569	2.76765	7.58447	0.461091	3.58588
2000	900	19.6824	69.7427	0.0702737	7.98454	1.50273	0	5.43092	0.616101	0.245682	2.75703	7.59053	0.462223	3.59727
Title:	R-magma	-	mresidual	from	MZ-magma	at	T	=	1145	C
liquid_0	thermodynamic	data	and	composition:
Pressure	Temperature	mass	S	H	V	Cp	viscosity	SiO2	TiO2	Al2O3	Fe2O3	Cr2O3	FeO	MnO	MgO	CaO	Na2O	K2O	H2O	Mg#
2000	1400	99.9969	293.666	-1.23075e+06	39.7776	150.454	2.064	55.6435	0.148157	17.2397	0.989197	0.00551049	5.55712	0.121267	6.4575	9.21897	3.80066	0.110383	0.708051	67.4
2000	1400	99.9969	293.666	-1.23075e+06	39.7776	150.454	2.064	55.6435	0.148157	17.2397	0.989197	0.00551049	5.55712	0.121267	6.4575	9.21897	3.80066	0.110383	0.708051	67.4
2000	1399	99.9969	293.576	-1.2309e+06	39.7746	150.454	2.068	55.6435	0.148157	17.2397	0.989312	0.00551049	5.55702	0.121267	6.4575	9.21897	3.80066	0.110383	0.708051	67.4
2000	1398	99.9969	293.486	-1.23105e+06	39.7716	150.453	2.072	55.6434	0.148157	17.2397	0.989427	0.00551049	5.55692	0.121267	6.4575	9.21897	3.80066	0.110383	0.708051	67.4
2000	1397	99.9969	293.396	-1.2312e+06	39.7685	150.453	2.076	55.6434	0.148157	17.2397	0.989544	0.00551049	5.55681	0.121267	6.4575	9.21897	3.80066	0.110383	0.708051	67.4
2000	1396	99.9969	293.306	-1.23136e+06	39.7655	150.453	2.08	55.6434	0.148157	17.2397	0.989662	0.00551049	5.5567	0.121267	6.4575	9.21897	3.80066	0.110383	0.708051	67.4
2000	1395	99.997	293.216	-1.23151e+06	39.7625	150.453	2.084	55.6434	0.148157	17.2397	0.989781	0.00551049	5.5566	0.121267	6.4575	9.21897	3.80066	0.110383	0.708051	67.4
2000	1394	99.997	293.126	-1.23166e+06	39.7594	150.452	2.087	55.6434	0.148157	17.2397	0.989901	0.00551048	5.55649	0.121267	6.4575	9.21897	3.80066	0.110383	0.708051	67.4
2000	1393	99.997	293.036	-1.23181e+06	39.7564	150.452	2.091	55.6434	0.148157	17.2397	0.990023	0.00551048	5.55638	0.121267	6.4575	9.21897	3.80066	0.110383	0.708051	67.4
2000	1392	99.997	292.945	-1.23196e+06	39.7534	150.452	2.095	55.6434	0.148157	17.2397	0.990145	0.00551048	5.55627	0.121267	6.4575	9.21896	3.80066	0.110383	0.708051	67.4
2000	1391	99.997	292.855	-1.23211e+06	39.7503	150.451	2.099	55.6434	0.148157	17.2397	0.990269	0.00551048	5.55615	0.121267	6.45749	9.21896	3.80066	0.110383	0.708051	67.4
2000	1390	99.997	292.765	-1.23226e+06	39.7473	150.451	2.103	55.6434	0.148157	17.2397	0.990394	0.00551048	5.55604	0.121267	6.45749	9.21896	3.80066	0.110383	0.708051	67.4
2000	1389	99.997	292.674	-1.23241e+06	39.7443	150.451	2.107	55.6434	0.148157	17.2397	0.990521	0.00551048	5.55593	0.121267	6.45749	9.21896	3.80066	0.110382	0.708051	67.4
2000	1388	99.997	292.584	-1.23256e+06	39.7412	150.451	2.111	55.6434	0.148157	17.2397	0.990648	0.00551048	5.55581	0.121267	6.45749	9.21896	3.80065	0.110382	0.70805	67.4
2000	1387	99.9971	292.493	-1.23271e+06	39.7382	150.45	2.115	55.6434	0.148157	17.2397	0.990777	0.00551048	5.55569	0.121267	6.45749	9.21896	3.80065	0.110382	0.70805	67.4
2000	1386	99.9971	292.403	-1.23286e+06	39.7352	150.45	2.119	55.6434	0.148157	17.2397	0.990907	0.00551048	5.55558	0.121267	6.45749	9.21896	3.80065	0.110382	0.70805	67.4
2000	1385	99.9971	292.312	-1.23301e+06	39.7321	150.45	2.123	55.6434	0.148157	17.2397	0.991038	0.00551048	5.55546	0.121267	6.45749	9.21896	3.80065	0.110382	0.70805	67.4
2000	1384	99.9971	292.221	-1.23316e+06	39.7291	150.45	2.127	55.6433	0.148157	17.2397	0.99117	0.00551048	5.55534	0.121267	6.45749	9.21896	3.80065	0.110382	0.70805	67.4
2000	1383	99.9971	292.13	-1.23331e+06	39.7261	150.449	2.131	55.6433	0.148157	17.2397	0.991304	0.00551048	5.55522	0.121267	6.45749	9.21895	3.80065	0.110382	0.70805	67.4
2000	1382	99.9971	292.04	-1.23346e+06	39.723	150.449	2.134	55.6433	0.148157	17.2397	0.991439	0.00551048	5.55509	0.121267	6.45749	9.21895	3.80065	0.110382	0.70805	67.4
2000	1381	99.9971	291.949	-1.23361e+06	39.72	150.449	2.138	55.6433	0.148157	17.2397	0.991575	0.00551048	5.55497	0.121267	6.45749	9.21895	3.80065	0.110382	0.70805	67.4
2000	1380	99.9971	291.858	-1.23377e+06	39.717	150.449	2.142	55.6433	0.148157	17.2397	0.991712	0.00551047	5.55485	0.121267	6.45749	9.21895	3.80065	0.110382	0.70805	67.4
2000	1379	99.9972	291.767	-1.23392e+06	39.7139	150.448	2.146	55.6433	0.148157	17.2397	0.99185	0.00551047	5.55472	0.121267	6.45748	9.21895	3.80065	0.110382	0.70805	67.4
2000	1378	99.9972	291.676	-1.23407e+06	39.7109	150.448	2.15	55.6433	0.148157	17.2397	0.99199	0.00551047	5.55459	0.121267	6.45748	9.21895	3.80065	0.110382	0.708049	67.4
2000	1377	99.9972	291.585	-1.23422e+06	39.7079	150.448	2.154	55.6433	0.148157	17.2397	0.992131	0.00551047	5.55447	0.121267	6.45748	9.21895	3.80065	0.110382	0.708049	67.4
2000	1376	99.9972	291.493	-1.23437e+06	39.7049	150.447	2.158	55.6433	0.148157	17.2397	0.992273	0.00551047	5.55434	0.121267	6.45748	9.21895	3.80065	0.110382	0.708049	67.4
2000	1375	99.9972	291.402	-1.23452e+06	39.7018	150.447	2.162	55.6433	0.148157	17.2397	0.992417	0.00551047	5.55421	0.121267	6.45748	9.21894	3.80065	0.110382	0.708049	67.4
2000	1374	99.9972	291.311	-1.23467e+06	39.6988	150.447	2.166	55.6433	0.148157	17.2397	0.992561	0.00551047	5.55408	0.121267	6.45748	9.21894	3.80065	0.110382	0.708049	67.4
2000	1373	99.9972	291.22	-1.23482e+06	39.6958	150.447	2.17	55.6433	0.148157	17.2397	0.992707	0.00551047	5.55394	0.121267	6.45748	9.21894	3.80065	0.110382	0.708049	67.4
2000	1372	99.9973	291.128	-1.23497e+06	39.6927	150.446	2.174	55.6433	0.148157	17.2397	0.992854	0.00551047	5.55381	0.121267	6.45748	9.21894	3.80065	0.110382	0.708049	67.4
2000	1371	99.9973	291.037	-1.23512e+06	39.6897	150.446	2.178	55.6432	0.148157	17.2396	0.993003	0.00551047	5.55368	0.121267	6.45748	9.21894	3.80065	0.110382	0.708049	67.5
2000	1370	99.9973	290.945	-1.23527e+06	39.6867	150.446	2.182	55.6432	0.148157	17.2396	0.993153	0.00551047	5.55354	0.121267	6.45748	9.21894	3.80065	0.110382	0.708049	67.5
2000	1369	99.9973	290.854	-1.23542e+06	39.6836	150.446	2.186	55.6432	0.148157	17.2396	0.993304	0.00551047	5.5534	0.121267	6.45747	9.21894	3.80064	0.110382	0.708049	67.5
2000	1368	99.9973	290.762	-1.23557e+06	39.6806	150.445	2.19	55.6432	0.148157	17.2396	0.993456	0.00551046	5.55327	0.121267	6.45747	9.21893	3.80064	0.110382	0.708048	67.5
2000	1367	99.9973	290.67	-1.23572e+06	39.6776	150.445	2.194	55.6432	0.148157	17.2396	0.993609	0.00551046	5.55313	0.121267	6.45747	9.21893	3.80064	0.110382	0.708048	67.5
2000	1366	99.9974	290.579	-1.23587e+06	39.6746	150.445	2.198	55.6432	0.148157	17.2396	0.993764	0.00551046	5.55299	0.121267	6.45747	9.21893	3.80064	0.110382	0.708048	67.5
2000	1365	99.9974	290.487	-1.23603e+06	39.6715	150.445	2.202	55.6432	0.148157	17.2396	0.99392	0.00551046	5.55284	0.121267	6.45747	9.21893	3.80064	0.110382	0.708048	67.5
2000	1364	99.9974	290.395	-1.23618e+06	39.6685	150.444	2.206	55.6432	0.148157	17.2396	0.994078	0.00551046	5.5527	0.121267	6.45747	9.21893	3.80064	0.110382	0.708048	67.5
2000	1363	99.9974	290.303	-1.23633e+06	39.6655	150.444	2.21	55.6432	0.148157	17.2396	0.994236	0.00551046	5.55256	0.121267	6.45747	9.21893	3.80064	0.110382	0.708048	67.5
2000	1362	99.9974	290.211	-1.23648e+06	39.6625	150.444	2.214	55.6432	0.148157	17.2396	0.994396	0.00551046	5.55241	0.121267	6.45747	9.21893	3.80064	0.110382	0.708048	67.5
2000	1361	99.9974	290.119	-1.23663e+06	39.6594	150.444	2.218	55.6432	0.148156	17.2396	0.994558	0.00551046	5.55227	0.121267	6.45747	9.21892	3.80064	0.110382	0.708048	67.5
2000	1360	99.9974	290.027	-1.23678e+06	39.6564	150.443	2.223	55.6432	0.148156	17.2396	0.99472	0.00551046	5.55212	0.121267	6.45747	9.21892	3.80064	0.110382	0.708048	67.5
2000	1359	99.9975	289.935	-1.23693e+06	39.6534	150.443	2.227	55.6431	0.148156	17.2396	0.994884	0.00551046	5.55197	0.121267	6.45746	9.21892	3.80064	0.110382	0.708047	67.5
2000	1358	99.9975	289.843	-1.23708e+06	39.6503	150.443	2.231	55.6431	0.148156	17.2396	0.995049	0.00551046	5.55182	0.121267	6.45746	9.21892	3.80064	0.110382	0.708047	67.5
2000	1357	99.9975	289.751	-1.23723e+06	39.6473	150.443	2.235	55.6431	0.148156	17.2396	0.995216	0.00551045	5.55167	0.121267	6.45746	9.21892	3.80064	0.110382	0.708047	67.5
2000	1356	99.9975	289.658	-1.23738e+06	39.6443	150.442	2.239	55.6431	0.148156	17.2396	0.995383	0.00551045	5.55152	0.121267	6.45746	9.21892	3.80064	0.110382	0.708047	67.5
2000	1355	99.9975	289.566	-1.23753e+06	39.6413	150.442	2.243	55.6431	0.148156	17.2396	0.995552	0.00551045	5.55137	0.121266	6.45746	9.21891	3.80064	0.110382	0.708047	67.5
2000	1354	99.9975	289.474	-1.23768e+06	39.6382	150.442	2.247	55.6431	0.148156	17.2396	0.995723	0.00551045	5.55121	0.121266	6.45746	9.21891	3.80064	0.110382	0.708047	67.5
2000	1353	99.9976	289.381	-1.23783e+06	39.6352	150.442	2.251	55.6431	0.148156	17.2396	0.995895	0.00551045	5.55106	0.121266	6.45746	9.21891	3.80063	0.110382	0.708047	67.5
2000	1352	99.9976	289.289	-1.23798e+06	39.6322	150.441	2.255	55.6431	0.148156	17.2396	0.996068	0.00551045	5.5509	0.121266	6.45746	9.21891	3.80063	0.110382	0.708047	67.5
2000	1351	99.9976	289.196	-1.23813e+06	39.6292	150.441	2.259	55.6431	0.148156	17.2396	0.996242	0.00551045	5.55074	0.121266	6.45746	9.21891	3.80063	0.110382	0.708046	67.5
2000	1350	99.9976	289.104	-1.23829e+06	39.6261	150.441	2.263	55.6431	0.148156	17.2396	0.996418	0.00551045	5.55058	0.121266	6.45745	9.21891	3.80063	0.110382	0.708046	67.5
2000	1349	99.9976	289.011	-1.23844e+06	39.6231	150.441	2.267	55.643	0.148156	17.2396	0.996595	0.00551045	5.55042	0.121266	6.45745	9.21891	3.80063	0.110382	0.708046	67.5
2000	1348	99.9977	288.918	-1.23859e+06	39.6201	150.44	2.272	55.643	0.148156	17.2396	0.996773	0.00551045	5.55026	0.121266	6.45745	9.2189	3.80063	0.110382	0.708046	67.5
2000	1347	99.9977	288.825	-1.23874e+06	39.6171	150.44	2.276	55.643	0.148156	17.2396	0.996953	0.00551045	5.5501	0.121266	6.45745	9.2189	3.80063	0.110382	0.708046	67.5
2000	1346	99.9977	288.733	-1.23889e+06	39.6141	150.44	2.28	55.643	0.148156	17.2396	0.997134	0.00551044	5.54993	0.121266	6.45745	9.2189	3.80063	0.110382	0.708046	67.5
2000	1345	99.9977	288.64	-1.23904e+06	39.611	150.44	2.284	55.643	0.148156	17.2396	0.997317	0.00551044	5.54977	0.121266	6.45745	9.2189	3.80063	0.110382	0.708046	67.5
2000	1344	99.9977	288.547	-1.23919e+06	39.608	150.44	2.288	55.643	0.148156	17.2396	0.9975	0.00551044	5.5496	0.121266	6.45745	9.2189	3.80063	0.110382	0.708046	67.5
2000	1343	99.9977	288.454	-1.23934e+06	39.605	150.439	2.292	55.643	0.148156	17.2396	0.997686	0.00551044	5.54943	0.121266	6.45745	9.2189	3.80063	0.110382	0.708045	67.5
2000	1342	99.9978	288.361	-1.23949e+06	39.602	150.439	2.296	55.643	0.148156	17.2396	0.997872	0.00551044	5.54926	0.121266	6.45745	9.21889	3.80063	0.110382	0.708045	67.5
2000	1341	99.9978	288.268	-1.23964e+06	39.5989	150.439	2.301	55.643	0.148156	17.2396	0.99806	0.00551044	5.54909	0.121266	6.45744	9.21889	3.80063	0.110382	0.708045	67.5
2000	1340	99.9978	288.174	-1.23979e+06	39.5959	150.439	2.305	55.643	0.148156	17.2396	0.998249	0.00551044	5.54892	0.121266	6.45744	9.21889	3.80063	0.110382	0.708045	67.5
2000	1339	99.9978	288.081	-1.23994e+06	39.5929	150.438	2.309	55.6429	0.148156	17.2396	0.99844	0.00551044	5.54875	0.121266	6.45744	9.21889	3.80063	0.110382	0.708045	67.5
2000	1338	99.9978	287.988	-1.24009e+06	39.5899	150.438	2.313	55.6429	0.148156	17.2396	0.998632	0.00551044	5.54857	0.121266	6.45744	9.21889	3.80062	0.110382	0.708045	67.5
2000	1337	99.9979	287.894	-1.24024e+06	39.5869	150.438	2.317	55.6429	0.148156	17.2395	0.998825	0.00551044	5.5484	0.121266	6.45744	9.21888	3.80062	0.110382	0.708045	67.5
2000	1336	99.9979	287.801	-1.24039e+06	39.5838	150.438	2.321	55.6429	0.148156	17.2395	0.99902	0.00551043	5.54822	0.121266	6.45744	9.21888	3.80062	0.110382	0.708044	67.5
2000	1335	99.9979	287.708	-1.24055e+06	39.5808	150.437	2.326	55.6429	0.148156	17.2395	0.999216	0.00551043	5.54804	0.121266	6.45744	9.21888	3.80062	0.110382	0.708044	67.5
2000	1334	99.9979	287.614	-1.2407e+06	39.5778	150.437	2.33	55.6429	0.148156	17.2395	0.999414	0.00551043	5.54787	0.121266	6.45744	9.21888	3.80062	0.110382	0.708044	67.5
2000	1333	99.9979	287.52	-1.24085e+06	39.5748	150.437	2.334	55.6429	0.148156	17.2395	0.999613	0.00551043	5.54769	0.121266	6.45743	9.21888	3.80062	0.110381	0.708044	67.5
2000	1332	99.998	287.427	-1.241e+06	39.5718	150.437	2.338	55.6429	0.148156	17.2395	0.999813	0.00551043	5.5475	0.121266	6.45743	9.21888	3.80062	0.110381	0.708044	67.5
2000	1331	99.998	287.333	-1.24115e+06	39.5687	150.437	2.342	55.6429	0.148156	17.2395	1.00001	0.00551043	5.54732	0.121266	6.45743	9.21887	3.80062	0.110381	0.708044	67.5
2000	1330	99.998	287.239	-1.2413e+06	39.5657	150.436	2.347	55.6428	0.148156	17.2395	1.00022	0.00551043	5.54714	0.121266	6.45743	9.21887	3.80062	0.110381	0.708044	67.5
2000	1329	99.998	287.145	-1.24145e+06	39.5627	150.436	2.351	55.6428	0.148156	17.2395	1.00042	0.00551043	5.54695	0.121266	6.45743	9.21887	3.80062	0.110381	0.708043	67.5
2000	1328	99.998	287.052	-1.2416e+06	39.5597	150.436	2.355	55.6428	0.148156	17.2395	1.00063	0.00551043	5.54676	0.121266	6.45743	9.21887	3.80062	0.110381	0.708043	67.5
2000	1327	99.9981	286.958	-1.24175e+06	39.5567	150.436	2.359	55.6428	0.148156	17.2395	1.00084	0.00551042	5.54658	0.121266	6.45743	9.21887	3.80062	0.110381	0.708043	67.5
2000	1326	99.9981	286.864	-1.2419e+06	39.5536	150.435	2.363	55.6428	0.148156	17.2395	1.00105	0.00551042	5.54639	0.121266	6.45742	9.21886	3.80062	0.110381	0.708043	67.5
2000	1325	99.9981	286.77	-1.24205e+06	39.5506	150.435	2.368	55.6428	0.148155	17.2395	1.00126	0.00551042	5.5462	0.121266	6.45742	9.21886	3.80061	0.110381	0.708043	67.5
2000	1324	99.9981	286.676	-1.2422e+06	39.5476	150.435	2.372	55.6428	0.148155	17.2395	1.00147	0.00551042	5.546	0.121266	6.45742	9.21886	3.80061	0.110381	0.708043	67.5
2000	1323	99.9981	286.581	-1.24235e+06	39.5446	150.435	2.376	55.6428	0.148155	17.2395	1.00168	0.00551042	5.54581	0.121266	6.45742	9.21886	3.80061	0.110381	0.708043	67.5
2000	1322	99.9982	286.487	-1.24251e+06	39.5416	150.435	2.38	55.6427	0.148155	17.2395	1.0019	0.00551042	5.54562	0.121266	6.45742	9.21886	3.80061	0.110381	0.708042	67.5
2000	1321	99.9982	286.393	-1.24266e+06	39.5385	150.434	2.385	55.6427	0.148155	17.2395	1.00211	0.00551042	5.54542	0.121266	6.45742	9.21885	3.80061	0.110381	0.708042	67.5
2000	1320	99.9982	286.298	-1.24281e+06	39.5355	150.434	2.389	55.6427	0.148155	17.2395	1.00233	0.00551042	5.54522	0.121266	6.45742	9.21885	3.80061	0.110381	0.708042	67.5
2000	1319	99.9982	286.204	-1.24296e+06	39.5325	150.434	2.393	55.6427	0.148155	17.2395	1.00255	0.00551041	5.54503	0.121266	6.45741	9.21885	3.80061	0.110381	0.708042	67.5
2000	1318	99.9983	286.11	-1.24311e+06	39.5295	150.434	2.397	55.6427	0.148155	17.2395	1.00277	0.00551041	5.54483	0.121266	6.45741	9.21885	3.80061	0.110381	0.708042	67.5
2000	1317	99.9983	286.015	-1.24326e+06	39.5265	150.433	2.402	55.6427	0.148155	17.2395	1.00299	0.00551041	5.54462	0.121266	6.45741	9.21885	3.80061	0.110381	0.708042	67.5
2000	1316	99.9983	285.92	-1.24341e+06	39.5235	150.433	2.406	55.6427	0.148155	17.2395	1.00321	0.00551041	5.54442	0.121266	6.45741	9.21884	3.80061	0.110381	0.708042	67.5
2000	1315	99.9983	285.826	-1.24356e+06	39.5205	150.433	2.41	55.6427	0.148155	17.2395	1.00344	0.00551041	5.54422	0.121266	6.45741	9.21884	3.80061	0.110381	0.708041	67.5
2000	1314	99.9983	285.731	-1.24371e+06	39.5174	150.433	2.415	55.6427	0.148155	17.2395	1.00366	0.00551041	5.54401	0.121266	6.45741	9.21884	3.80061	0.110381	0.708041	67.5
2000	1313	99.9984	285.636	-1.24386e+06	39.5144	150.433	2.419	55.6426	0.148155	17.2395	1.00389	0.00551041	5.54381	0.121265	6.45741	9.21884	3.8006	0.110381	0.708041	67.5
2000	1312	99.9984	285.542	-1.24401e+06	39.5114	150.432	2.423	55.6426	0.148155	17.2395	1.00412	0.00551041	5.5436	0.121265	6.4574	9.21884	3.8006	0.110381	0.708041	67.5
2000	1311	99.9984	285.447	-1.24416e+06	39.5084	150.432	2.427	55.6426	0.148155	17.2395	1.00435	0.0055104	5.54339	0.121265	6.4574	9.21883	3.8006	0.110381	0.708041	67.5
2000	1310	99.9984	285.352	-1.24431e+06	39.5054	150.432	2.432	55.6426	0.148155	17.2394	1.00458	0.0055104	5.54318	0.121265	6.4574	9.21883	3.8006	0.110381	0.708041	67.5
2000	1309	99.9985	285.257	-1.24446e+06	39.5024	150.432	2.436	55.6426	0.148155	17.2394	1.00482	0.0055104	5.54297	0.121265	6.4574	9.21883	3.8006	0.110381	0.70804	67.5
2000	1308	99.9985	285.162	-1.24462e+06	39.4994	150.432	2.44	55.6426	0.148155	17.2394	1.00505	0.0055104	5.54275	0.121265	6.4574	9.21883	3.8006	0.110381	0.70804	67.5
2000	1307	99.9985	285.067	-1.24477e+06	39.4963	150.431	2.445	55.6426	0.148155	17.2394	1.00529	0.0055104	5.54254	0.121265	6.4574	9.21882	3.8006	0.110381	0.70804	67.5
2000	1306	99.9985	284.971	-1.24492e+06	39.4933	150.431	2.449	55.6425	0.148155	17.2394	1.00553	0.0055104	5.54232	0.121265	6.4574	9.21882	3.8006	0.110381	0.70804	67.5
2000	1305	99.9986	284.876	-1.24507e+06	39.4903	150.431	2.453	55.6425	0.148155	17.2394	1.00577	0.0055104	5.54211	0.121265	6.45739	9.21882	3.8006	0.110381	0.70804	67.5
2000	1304	99.9986	284.781	-1.24522e+06	39.4873	150.431	2.458	55.6425	0.148155	17.2394	1.00601	0.0055104	5.54189	0.121265	6.45739	9.21882	3.8006	0.110381	0.70804	67.5
2000	1303	99.9986	284.686	-1.24537e+06	39.4843	150.431	2.462	55.6425	0.148155	17.2394	1.00625	0.00551039	5.54167	0.121265	6.45739	9.21882	3.8006	0.110381	0.708039	67.5
2000	1302	99.9986	284.59	-1.24552e+06	39.4813	150.43	2.466	55.6425	0.148155	17.2394	1.0065	0.00551039	5.54145	0.121265	6.45739	9.21881	3.80059	0.110381	0.708039	67.5
2000	1301	99.9987	284.495	-1.24567e+06	39.4783	150.43	2.471	55.6425	0.148155	17.2394	1.00674	0.00551039	5.54122	0.121265	6.45739	9.21881	3.80059	0.110381	0.708039	67.5
2000	1300	99.9987	284.399	-1.24582e+06	39.4753	150.43	2.475	55.6425	0.148155	17.2394	1.00699	0.00551039	5.541	0.121265	6.45739	9.21881	3.80059	0.110381	0.708039	67.5
2000	1299	99.9987	284.303	-1.24597e+06	39.4722	150.43	2.48	55.6425	0.148155	17.2394	1.00724	0.00551039	5.54077	0.121265	6.45738	9.21881	3.80059	0.110381	0.708039	67.5
2000	1298	99.9987	284.208	-1.24612e+06	39.4692	150.43	2.484	55.6424	0.148155	17.2394	1.00749	0.00551039	5.54055	0.121265	6.45738	9.2188	3.80059	0.110381	0.708038	67.5
2000	1297	99.9988	284.112	-1.24627e+06	39.4662	150.429	2.488	55.6424	0.148155	17.2394	1.00774	0.00551039	5.54032	0.121265	6.45738	9.2188	3.80059	0.110381	0.708038	67.5
2000	1296	99.9988	284.016	-1.24643e+06	39.4632	150.429	2.493	55.6424	0.148154	17.2394	1.008	0.00551038	5.54009	0.121265	6.45738	9.2188	3.80059	0.110381	0.708038	67.5
2000	1295	99.9988	283.92	-1.24658e+06	39.4602	150.429	2.497	55.6424	0.148154	17.2394	1.00825	0.00551038	5.53986	0.121265	6.45738	9.2188	3.80059	0.110381	0.708038	67.5
2000	1294	99.9988	283.825	-1.24673e+06	39.4572	150.429	2.502	55.6424	0.148154	17.2394	1.00851	0.00551038	5.53962	0.121265	6.45738	9.2188	3.80059	0.11038	0.708038	67.5
2000	1293	99.9989	283.729	-1.24688e+06	39.4542	150.429	2.506	55.6424	0.148154	17.2394	1.00877	0.00551038	5.53939	0.121265	6.45737	9.21879	3.80059	0.11038	0.708038	67.5
2000	1292	99.9989	283.633	-1.24703e+06	39.4512	150.428	2.51	55.6424	0.148154	17.2394	1.00903	0.00551038	5.53915	0.121265	6.45737	9.21879	3.80058	0.11038	0.708037	67.5
2000	1291	99.9989	283.536	-1.24718e+06	39.4482	150.428	2.515	55.6423	0.148154	17.2394	1.00929	0.00551038	5.53892	0.121265	6.45737	9.21879	3.80058	0.11038	0.708037	67.5
2000	1290	99.9989	283.44	-1.24733e+06	39.4452	150.428	2.519	55.6423	0.148154	17.2394	1.00955	0.00551038	5.53868	0.121265	6.45737	9.21879	3.80058	0.11038	0.708037	67.5
2000	1289	99.999	283.344	-1.24748e+06	39.4421	150.428	2.524	55.6423	0.148154	17.2394	1.00982	0.00551037	5.53844	0.121265	6.45737	9.21878	3.80058	0.11038	0.708037	67.5
2000	1288	99.999	283.248	-1.24763e+06	39.4391	150.428	2.528	55.6423	0.148154	17.2394	1.01008	0.00551037	5.5382	0.121265	6.45737	9.21878	3.80058	0.11038	0.708037	67.5
2000	1287	99.999	283.152	-1.24778e+06	39.4361	150.427	2.533	55.6423	0.148154	17.2393	1.01035	0.00551037	5.53796	0.121265	6.45736	9.21878	3.80058	0.11038	0.708036	67.5
2000	1286	99.999	283.055	-1.24793e+06	39.4331	150.427	2.537	55.6423	0.148154	17.2393	1.01062	0.00551037	5.53771	0.121265	6.45736	9.21878	3.80058	0.11038	0.708036	67.5
2000	1285	99.9991	282.959	-1.24808e+06	39.4301	150.427	2.541	55.6422	0.148154	17.2393	1.01089	0.00551037	5.53747	0.121265	6.45736	9.21877	3.80058	0.11038	0.708036	67.5
2000	1284	99.9991	282.862	-1.24823e+06	39.4271	150.427	2.546	55.6422	0.148154	17.2393	1.01116	0.00551037	5.53722	0.121265	6.45736	9.21877	3.80058	0.11038	0.708036	67.5
2000	1283	99.9991	282.766	-1.24839e+06	39.4241	150.427	2.55	55.6422	0.148154	17.2393	1.01144	0.00551037	5.53697	0.121265	6.45736	9.21877	3.80058	0.11038	0.708036	67.5
2000	1282	99.9992	282.669	-1.24854e+06	39.4211	150.427	2.555	55.6422	0.148154	17.2393	1.01171	0.00551036	5.53672	0.121265	6.45736	9.21877	3.80057	0.11038	0.708035	67.5
2000	1281	99.9992	282.572	-1.24869e+06	39.4181	150.426	2.559	55.6422	0.148154	17.2393	1.01199	0.00551036	5.53647	0.121264	6.45735	9.21876	3.80057	0.11038	0.708035	67.5
2000	1280	99.9992	282.475	-1.24884e+06	39.4151	150.426	2.564	55.6422	0.148154	17.2393	1.01227	0.00551036	5.53622	0.121264	6.45735	9.21876	3.80057	0.11038	0.708035	67.5
2000	1279	99.9992	282.379	-1.24899e+06	39.4121	150.426	2.568	55.6422	0.148154	17.2393	1.01255	0.00551036	5.53596	0.121264	6.45735	9.21876	3.80057	0.11038	0.708035	67.5
2000	1278	99.9993	282.282	-1.24914e+06	39.4091	150.426	2.573	55.6421	0.148154	17.2393	1.01283	0.00551036	5.5357	0.121264	6.45735	9.21876	3.80057	0.11038	0.708035	67.5
2000	1277	99.9993	282.185	-1.24929e+06	39.4061	150.426	2.577	55.6421	0.148154	17.2393	1.01312	0.00551036	5.53545	0.121264	6.45735	9.21875	3.80057	0.11038	0.708034	67.5
2000	1276	99.9993	282.088	-1.24944e+06	39.4031	150.425	2.582	55.6421	0.148154	17.2393	1.0134	0.00551035	5.53519	0.121264	6.45734	9.21875	3.80057	0.11038	0.708034	67.5
2000	1275	99.9994	281.991	-1.24959e+06	39.4001	150.425	2.586	55.6421	0.148154	17.2393	1.01369	0.00551035	5.53493	0.121264	6.45734	9.21875	3.80057	0.11038	0.708034	67.5
2000	1274	99.9994	281.894	-1.24974e+06	39.3971	150.425	2.591	55.6421	0.148154	17.2393	1.01398	0.00551035	5.53467	0.121264	6.45734	9.21874	3.80057	0.11038	0.708034	67.5
2000	1273	99.9994	281.796	-1.24989e+06	39.3941	150.425	2.595	55.6421	0.148154	17.2393	1.01427	0.00551035	5.5344	0.121264	6.45734	9.21874	3.80056	0.11038	0.708034	67.5
2000	1272	99.9994	281.699	-1.25004e+06	39.391	150.425	2.6	55.642	0.148154	17.2393	1.01456	0.00551035	5.53414	0.121264	6.45734	9.21874	3.80056	0.11038	0.708033	67.5
2000	1271	99.9995	281.602	-1.2502e+06	39.388	150.425	2.604	55.642	0.148153	17.2393	1.01486	0.00551035	5.53387	0.121264	6.45734	9.21874	3.80056	0.11038	0.708033	67.5
2000	1270	99.9995	281.504	-1.25035e+06	39.385	150.424	2.609	55.642	0.148153	17.2393	1.01515	0.00551034	5.5336	0.121264	6.45733	9.21873	3.80056	0.11038	0.708033	67.5
2000	1269	99.9995	281.407	-1.2505e+06	39.382	150.424	2.613	55.642	0.148153	17.2393	1.01545	0.00551034	5.53333	0.121264	6.45733	9.21873	3.80056	0.11038	0.708033	67.5
2000	1268	99.9996	281.309	-1.25065e+06	39.379	150.424	2.618	55.642	0.148153	17.2393	1.01575	0.00551034	5.53306	0.121264	6.45733	9.21873	3.80056	0.11038	0.708033	67.5
2000	1267	99.9996	281.212	-1.2508e+06	39.376	150.424	2.623	55.642	0.148153	17.2393	1.01605	0.00551034	5.53279	0.121264	6.45733	9.21873	3.80056	0.11038	0.708032	67.5
2000	1266	99.9996	281.114	-1.25095e+06	39.373	150.424	2.627	55.6419	0.148153	17.2392	1.01635	0.00551034	5.53252	0.121264	6.45733	9.21872	3.80056	0.11038	0.708032	67.5
2000	1265	99.9996	281.017	-1.2511e+06	39.37	150.424	2.632	55.6419	0.148153	17.2392	1.01666	0.00551034	5.53224	0.121264	6.45732	9.21872	3.80056	0.11038	0.708032	67.5
2000	1264	99.9997	280.919	-1.25125e+06	39.367	150.423	2.636	55.6419	0.148153	17.2392	1.01696	0.00551033	5.53196	0.121264	6.45732	9.21872	3.80055	0.11038	0.708032	67.5
2000	1263	99.9997	280.821	-1.2514e+06	39.364	150.423	2.641	55.6419	0.148153	17.2392	1.01727	0.00551033	5.53168	0.121264	6.45732	9.21871	3.80055	0.11038	0.708032	67.5
2000	1262	99.9997	280.723	-1.25155e+06	39.361	150.423	2.645	55.6419	0.148153	17.2392	1.01758	0.00551033	5.5314	0.121264	6.45732	9.21871	3.80055	0.110379	0.708031	67.5
2000	1261	99.9998	280.625	-1.2517e+06	39.358	150.423	2.65	55.6419	0.148153	17.2392	1.01789	0.00551033	5.53112	0.121264	6.45732	9.21871	3.80055	0.110379	0.708031	67.5
2000	1260	99.9998	280.527	-1.25185e+06	39.355	150.423	2.655	55.6418	0.148153	17.2392	1.0182	0.00551033	5.53084	0.121264	6.45731	9.21871	3.80055	0.110379	0.708031	67.5
2000	1259	99.9998	280.429	-1.25201e+06	39.352	150.423	2.659	55.6418	0.148153	17.2392	1.01852	0.00551033	5.53055	0.121264	6.45731	9.2187	3.80055	0.110379	0.708031	67.5
2000	1258	99.9999	280.331	-1.25216e+06	39.349	150.422	2.664	55.6418	0.148153	17.2392	1.01883	0.00551032	5.53027	0.121264	6.45731	9.2187	3.80055	0.110379	0.70803	67.5
2000	1257	99.9999	280.233	-1.25231e+06	39.346	150.422	2.668	55.6418	0.148153	17.2392	1.01915	0.00551032	5.52998	0.121264	6.45731	9.2187	3.80055	0.110379	0.70803	67.5
2000	1256	99.9999	280.134	-1.25246e+06	39.343	150.422	2.673	55.6418	0.148153	17.2392	1.01947	0.00551032	5.52969	0.121264	6.45731	9.21869	3.80055	0.110379	0.70803	67.5
2000	1255	100	280.036	-1.25261e+06	39.34	150.422	2.678	55.6418	0.148153	17.2392	1.01979	0.00551032	5.5294	0.121264	6.4573	9.21869	3.80054	0.110379	0.70803	67.5
2000	1254	100	279.938	-1.25276e+06	39.337	150.422	2.682	55.6417	0.148153	17.2392	1.02012	0.00551032	5.5291	0.121264	6.4573	9.21869	3.80054	0.110379	0.708029	67.5
2000	1253	100	279.839	-1.25291e+06	39.334	150.422	2.687	55.6417	0.148153	17.2392	1.02044	0.00551032	5.52881	0.121263	6.4573	9.21868	3.80054	0.110379	0.708029	67.5
2000	1252	100	279.741	-1.25306e+06	39.331	150.421	2.692	55.6417	0.148153	17.2392	1.02077	0.00551031	5.52851	0.121263	6.4573	9.21868	3.80054	0.110379	0.708029	67.5
2000	1251	100	279.642	-1.25321e+06	39.328	150.421	2.696	55.6417	0.148153	17.2392	1.0211	0.00551031	5.52821	0.121263	6.45729	9.21868	3.80054	0.110379	0.708029	67.6
2000	1250	100	279.543	-1.25336e+06	39.325	150.421	2.701	55.6417	0.148152	17.2392	1.02143	0.00551031	5.52792	0.121263	6.45729	9.21868	3.80054	0.110379	0.708029	67.6
2000	1249	100	279.445	-1.25351e+06	39.3221	150.421	2.706	55.6416	0.148152	17.2392	1.02176	0.00551031	5.52761	0.121263	6.45729	9.21867	3.80054	0.110379	0.708028	67.6
2000	1248	100	279.346	-1.25367e+06	39.3191	150.421	2.71	55.6416	0.148152	17.2391	1.02209	0.00551031	5.52731	0.121263	6.45729	9.21867	3.80054	0.110379	0.708028	67.6
2000	1247	100	279.247	-1.25382e+06	39.3161	150.421	2.715	55.6416	0.148152	17.2391	1.02243	0.0055103	5.52701	0.121263	6.45729	9.21867	3.80053	0.110379	0.708028	67.6
2000	1246	100	279.148	-1.25397e+06	39.3131	150.421	2.72	55.6416	0.148152	17.2391	1.02277	0.0055103	5.5267	0.121263	6.45728	9.21866	3.80053	0.110379	0.708028	67.6
2000	1245	100	279.049	-1.25412e+06	39.3101	150.42	2.724	55.6416	0.148152	17.2391	1.02311	0.0055103	5.52639	0.121263	6.45728	9.21866	3.80053	0.110379	0.708027	67.6
2000	1244	100	278.95	-1.25427e+06	39.3071	150.42	2.729	55.6415	0.148152	17.2391	1.02345	0.0055103	5.52608	0.121263	6.45728	9.21866	3.80053	0.110379	0.708027	67.6
2000	1243	100	278.851	-1.25442e+06	39.3041	150.42	2.734	55.6415	0.148152	17.2391	1.02379	0.0055103	5.52577	0.121263	6.45728	9.21865	3.80053	0.110379	0.708027	67.6
2000	1242	100	278.752	-1.25457e+06	39.3011	150.42	2.738	55.6415	0.148152	17.2391	1.02414	0.0055103	5.52546	0.121263	6.45728	9.21865	3.80053	0.110379	0.708027	67.6
2000	1241	100	278.653	-1.25472e+06	39.2981	150.42	2.743	55.6415	0.148152	17.2391	1.02448	0.00551029	5.52515	0.121263	6.45727	9.21865	3.80053	0.110379	0.708026	67.6
2000	1240	100	278.553	-1.25487e+06	39.2951	150.42	2.748	55.6415	0.148152	17.2391	1.02483	0.00551029	5.52483	0.121263	6.45727	9.21864	3.80052	0.110379	0.708026	67.6
2000	1239	100.001	278.454	-1.25502e+06	39.2921	150.42	2.753	55.6415	0.148152	17.2391	1.02518	0.00551029	5.52451	0.121263	6.45727	9.21864	3.80052	0.110379	0.708026	67.6
2000	1238	100.001	278.354	-1.25517e+06	39.2891	150.419	2.757	55.6414	0.148152	17.2391	1.02553	0.00551029	5.52419	0.121263	6.45727	9.21864	3.80052	0.110379	0.708026	67.6
2000	1237	100.001	278.255	-1.25533e+06	39.2861	150.419	2.762	55.6414	0.148152	17.2391	1.02589	0.00551029	5.52387	0.121263	6.45726	9.21863	3.80052	0.110379	0.708025	67.6
2000	1236	100.001	278.155	-1.25548e+06	39.2831	150.419	2.767	55.6414	0.148152	17.2391	1.02625	0.00551028	5.52355	0.121263	6.45726	9.21863	3.80052	0.110379	0.708025	67.6
2000	1235	100.001	278.056	-1.25563e+06	39.2801	150.419	2.772	55.6414	0.148152	17.2391	1.0266	0.00551028	5.52322	0.121263	6.45726	9.21863	3.80052	0.110378	0.708025	67.6
2000	1234	100.001	277.956	-1.25578e+06	39.2771	150.419	2.776	55.6414	0.148152	17.2391	1.02696	0.00551028	5.5229	0.121263	6.45726	9.21862	3.80052	0.110378	0.708025	67.6
2000	1233	100.001	277.856	-1.25593e+06	39.2742	150.419	2.781	55.6413	0.148152	17.2391	1.02732	0.00551028	5.52257	0.121263	6.45725	9.21862	3.80052	0.110378	0.708024	67.6
2000	1232	100.001	277.756	-1.25608e+06	39.2712	150.419	2.786	55.6413	0.148152	17.239	1.02769	0.00551028	5.52224	0.121263	6.45725	9.21862	3.80051	0.110378	0.708024	67.6
2000	1231	100.001	277.657	-1.25623e+06	39.2682	150.419	2.791	55.6413	0.148152	17.239	1.02805	0.00551027	5.52191	0.121263	6.45725	9.21861	3.80051	0.110378	0.708024	67.6
2000	1230	100.001	277.557	-1.25638e+06	39.2652	150.418	2.796	55.6413	0.148151	17.239	1.02842	0.00551027	5.52158	0.121262	6.45725	9.21861	3.80051	0.110378	0.708024	67.6
2000	1229	100.001	277.457	-1.25653e+06	39.2622	150.418	2.8	55.6412	0.148151	17.239	1.02879	0.00551027	5.52124	0.121262	6.45725	9.21861	3.80051	0.110378	0.708023	67.6
2000	1228	100.001	277.356	-1.25668e+06	39.2592	150.418	2.805	55.6412	0.148151	17.239	1.02916	0.00551027	5.52091	0.121262	6.45724	9.2186	3.80051	0.110378	0.708023	67.6
2000	1227	100.001	277.256	-1.25684e+06	39.2562	150.418	2.81	55.6412	0.148151	17.239	1.02954	0.00551027	5.52057	0.121262	6.45724	9.2186	3.80051	0.110378	0.708023	67.6
2000	1226	100.001	277.156	-1.25699e+06	39.2532	150.418	2.815	55.6412	0.148151	17.239	1.02991	0.00551026	5.52023	0.121262	6.45724	9.2186	3.80051	0.110378	0.708023	67.6
2000	1225	100.001	277.056	-1.25714e+06	39.2502	150.418	2.82	55.6412	0.148151	17.239	1.03029	0.00551026	5.51989	0.121262	6.45724	9.21859	3.8005	0.110378	0.708022	67.6
2000	1224	100.001	276.955	-1.25729e+06	39.2472	150.418	2.824	55.6411	0.148151	17.239	1.03067	0.00551026	5.51954	0.121262	6.45723	9.21859	3.8005	0.110378	0.708022	67.6
2000	1223	100.001	276.855	-1.25744e+06	39.2443	150.418	2.829	55.6411	0.148151	17.239	1.03105	0.00551026	5.5192	0.121262	6.45723	9.21859	3.8005	0.110378	0.708022	67.6
2000	1222	100.001	276.754	-1.25759e+06	39.2413	150.417	2.834	55.6411	0.148151	17.239	1.03143	0.00551025	5.51885	0.121262	6.45723	9.21858	3.8005	0.110378	0.708021	67.6
2000	1221	100.001	276.654	-1.25774e+06	39.2383	150.417	2.839	55.6411	0.148151	17.239	1.03181	0.00551025	5.5185	0.121262	6.45723	9.21858	3.8005	0.110378	0.708021	67.6
2000	1220	100.001	276.553	-1.25789e+06	39.2353	150.417	2.844	55.6411	0.148151	17.239	1.0322	0.00551025	5.51815	0.121262	6.45722	9.21858	3.8005	0.110378	0.708021	67.6
2000	1219	100.001	276.453	-1.25804e+06	39.2323	150.417	2.849	55.641	0.148151	17.239	1.03259	0.00551025	5.5178	0.121262	6.45722	9.21857	3.8005	0.110378	0.708021	67.6
2000	1218	100.001	276.352	-1.25819e+06	39.2293	150.417	2.853	55.641	0.148151	17.239	1.03298	0.00551025	5.51744	0.121262	6.45722	9.21857	3.80049	0.110378	0.70802	67.6
2000	1217	100.001	276.251	-1.25835e+06	39.2263	150.417	2.858	55.641	0.148151	17.239	1.03337	0.00551024	5.51709	0.121262	6.45722	9.21857	3.80049	0.110378	0.70802	67.6
2000	1216	100.001	276.15	-1.2585e+06	39.2234	150.417	2.863	55.641	0.148151	17.2389	1.03377	0.00551024	5.51673	0.121262	6.45721	9.21856	3.80049	0.110378	0.70802	67.6
2000	1215	100.001	276.049	-1.25865e+06	39.2204	150.417	2.868	55.6409	0.148151	17.2389	1.03417	0.00551024	5.51637	0.121262	6.45721	9.21856	3.80049	0.110378	0.70802	67.6
2000	1214	100.001	275.948	-1.2588e+06	39.2174	150.416	2.873	55.6409	0.148151	17.2389	1.03456	0.00551024	5.51601	0.121262	6.45721	9.21855	3.80049	0.110378	0.708019	67.6
2000	1213	100.001	275.847	-1.25895e+06	39.2144	150.416	2.878	55.6409	0.14815	17.2389	1.03496	0.00551024	5.51565	0.121262	6.45721	9.21855	3.80049	0.110378	0.708019	67.6
2000	1212	100.002	275.746	-1.2591e+06	39.2114	150.416	2.883	55.6409	0.14815	17.2389	1.03537	0.00551023	5.51528	0.121262	6.4572	9.21855	3.80048	0.110378	0.708019	67.6
2000	1211	100.002	275.645	-1.25925e+06	39.2084	150.416	2.888	55.6409	0.14815	17.2389	1.03577	0.00551023	5.51491	0.121262	6.4572	9.21854	3.80048	0.110377	0.708018	67.6
2000	1210	100.002	275.543	-1.2594e+06	39.2054	150.416	2.893	55.6408	0.14815	17.2389	1.03618	0.00551023	5.51455	0.121262	6.4572	9.21854	3.80048	0.110377	0.708018	67.6
2000	1209	100.002	275.442	-1.25955e+06	39.2025	150.416	2.897	55.6408	0.14815	17.2389	1.03659	0.00551023	5.51418	0.121262	6.45719	9.21854	3.80048	0.110377	0.708018	67.6
2000	1208	100.002	275.34	-1.2597e+06	39.1995	150.416	2.902	55.6408	0.14815	17.2389	1.037	0.00551022	5.5138	0.121261	6.45719	9.21853	3.80048	0.110377	0.708018	67.6
2000	1207	100.002	275.239	-1.25986e+06	39.1965	150.416	2.907	55.6408	0.14815	17.2389	1.03741	0.00551022	5.51343	0.121261	6.45719	9.21853	3.80048	0.110377	0.708017	67.6
2000	1206	100.002	275.14	-1.26e+06	39.1935	145.799	2.912	55.6407	0.14815	17.2389	1.03783	0.00551022	5.51305	0.121261	6.45719	9.21852	3.80048	0.110377	0.708017	67.6
2000	1205	100.002	275.041	-1.26015e+06	39.1905	145.798	2.917	55.6407	0.14815	17.2389	1.03824	0.00551022	5.51268	0.121261	6.45718	9.21852	3.80047	0.110377	0.708017	67.6
2000	1204	100.002	274.943	-1.2603e+06	39.1876	145.797	2.922	55.6407	0.14815	17.2389	1.03866	0.00551021	5.5123	0.121261	6.45718	9.21852	3.80047	0.110377	0.708016	67.6
2000	1203	100.002	274.844	-1.26044e+06	39.1846	145.796	2.927	55.6407	0.14815	17.2389	1.03908	0.00551021	5.51191	0.121261	6.45718	9.21851	3.80047	0.110377	0.708016	67.6
2000	1202	100.002	274.745	-1.26059e+06	39.1816	145.794	2.932	55.6407	0.14815	17.2388	1.03951	0.00551021	5.51153	0.121261	6.45718	9.21851	3.80047	0.110377	0.708016	67.6
2000	1201	100.002	274.647	-1.26073e+06	39.1786	145.793	2.937	55.6406	0.14815	17.2388	1.03993	0.00551021	5.51114	0.121261	6.45717	9.2185	3.80047	0.110377	0.708015	67.6
2000	1200	100.002	274.548	-1.26088e+06	39.1756	145.792	2.942	55.6406	0.14815	17.2388	1.04036	0.00551021	5.51076	0.121261	6.45717	9.2185	3.80047	0.110377	0.708015	67.6
2000	1199	100.002	274.449	-1.26103e+06	39.1727	145.791	2.947	55.6406	0.14815	17.2388	1.04079	0.0055102	5.51037	0.121261	6.45717	9.2185	3.80046	0.110377	0.708015	67.6
2000	1198	100.002	274.35	-1.26117e+06	39.1697	145.79	2.952	55.6406	0.14815	17.2388	1.04122	0.0055102	5.50998	0.121261	6.45716	9.21849	3.80046	0.110377	0.708015	67.6
2000	1197	100.002	274.251	-1.26132e+06	39.1667	145.788	2.957	55.6405	0.148149	17.2388	1.04166	0.0055102	5.50958	0.121261	6.45716	9.21849	3.80046	0.110377	0.708014	67.6
2000	1196	100.002	274.152	-1.26147e+06	39.1637	145.787	2.962	55.6405	0.148149	17.2388	1.04209	0.0055102	5.50919	0.121261	6.45716	9.21848	3.80046	0.110377	0.708014	67.6
2000	1195	100.002	274.053	-1.26161e+06	39.1607	145.786	2.967	55.6405	0.148149	17.2388	1.04253	0.00551019	5.50879	0.121261	6.45716	9.21848	3.80046	0.110377	0.708014	67.6
2000	1194	100.002	273.953	-1.26176e+06	39.1578	145.785	2.972	55.6405	0.148149	17.2388	1.04297	0.00551019	5.50839	0.121261	6.45715	9.21848	3.80046	0.110377	0.708013	67.6
2000	1193	100.002	273.854	-1.26191e+06	39.1548	145.783	2.977	55.6404	0.148149	17.2388	1.04341	0.00551019	5.50799	0.121261	6.45715	9.21847	3.80045	0.110377	0.708013	67.6
2000	1192	100.002	273.755	-1.26205e+06	39.1518	145.782	2.982	55.6404	0.148149	17.2388	1.04386	0.00551019	5.50759	0.121261	6.45715	9.21847	3.80045	0.110377	0.708013	67.6
2000	1191	99.7926	273.093	-1.25959e+06	39.0734	145.442	2.991	55.6412	0.148431	17.27	1.0438	0.00552177	5.50029	0.121516	6.40712	9.23359	3.80839	0.110609	0.709501	67.5
2000	1190	99.66	272.639	-1.25808e+06	39.0227	145.227	2.999	55.6417	0.14861	17.2898	1.04392	0.00552911	5.49548	0.121677	6.37545	9.24315	3.81343	0.110756	0.710445	67.4
2000	1189	99.528	272.187	-1.25658e+06	38.9723	145.013	3.007	55.6423	0.148788	17.3096	1.04404	0.00553645	5.49064	0.121839	6.34388	9.25268	3.81845	0.110903	0.711387	67.3
2000	1188	99.3965	271.736	-1.25509e+06	38.9221	144.799	3.015	55.6428	0.148966	17.3293	1.04415	0.00554377	5.48576	0.122	6.3124	9.26217	3.82347	0.111049	0.712328	67.2
2000	1187	98.6743	269.71	-1.24582e+06	38.6462	143.7	3.022	55.6695	0.150016	17.306	1.04823	0.00558435	5.50037	0.122893	6.27283	9.25778	3.83744	0.111804	0.717542	67
2000	1186	97.505	266.494	-1.23066e+06	38.1995	141.931	3.028	55.7167	0.151758	17.2487	1.05544	0.00565132	5.53026	0.124366	6.22708	9.24251	3.85838	0.113039	0.726147	66.7
2000	1185	96.3635	263.354	-1.21586e+06	37.7634	140.204	3.035	55.7637	0.153499	17.1915	1.06261	0.00571826	5.55992	0.12584	6.18165	9.22734	3.87919	0.114272	0.734749	66.5
2000	1184	95.2488	260.288	-1.20141e+06	37.3375	138.518	3.041	55.8104	0.155239	17.1346	1.06976	0.00578518	5.58935	0.127312	6.13652	9.21227	3.89987	0.115503	0.743347	66.2
2000	1183	94.1601	257.292	-1.18731e+06	36.9215	136.872	3.048	55.857	0.156979	17.0779	1.07689	0.00585207	5.61855	0.128784	6.0917	9.19731	3.92042	0.116732	0.751942	65.9
2000	1182	93.0963	254.366	-1.17352e+06	36.515	135.264	3.054	55.9033	0.158718	17.0213	1.08399	0.00591894	5.64753	0.130256	6.04718	9.18244	3.94084	0.117959	0.760534	65.6
2000	1181	92.0567	251.505	-1.16006e+06	36.1177	133.693	3.06	55.9494	0.160456	16.965	1.09106	0.00598578	5.67628	0.131727	6.00296	9.16767	3.96114	0.119184	0.769123	65.3
2000	1180	91.0405	248.709	-1.1469e+06	35.7293	132.158	3.067	55.9953	0.162194	16.9088	1.09811	0.0060526	5.70482	0.133197	5.95904	9.153	3.98132	0.120408	0.777708	65.1
2000	1179	90.0469	245.974	-1.13403e+06	35.3494	130.657	3.073	56.041	0.16393	16.8529	1.10514	0.00611939	5.73314	0.134667	5.9154	9.13841	4.00137	0.121629	0.78629	64.8
2000	1178	89.0751	243.3	-1.12145e+06	34.978	129.189	3.079	56.0866	0.165666	16.7971	1.11213	0.00618615	5.76125	0.136136	5.87206	9.12392	4.0213	0.122848	0.794868	64.5
2000	1177	88.1245	240.683	-1.10915e+06	34.6145	127.754	3.085	56.1319	0.167402	16.7415	1.11911	0.00625288	5.78914	0.137605	5.829	9.10952	4.04112	0.124065	0.803443	64.2
2000	1176	87.1943	238.123	-1.09711e+06	34.2589	126.35	3.092	56.177	0.169136	16.6861	1.12606	0.00631959	5.81682	0.139073	5.78622	9.0952	4.06081	0.12528	0.812014	63.9
2000	1175	86.1099	235.166	-1.08326e+06	33.8501	124.704	3.102	56.2339	0.170976	16.681	1.13102	0.00639917	5.84567	0.140824	5.72584	9.0244	4.09096	0.126764	0.822239	63.6
2000	1174	85.1204	232.457	-1.07057e+06	33.4751	123.205	3.111	56.2857	0.172769	16.6561	1.13671	0.00647356	5.87376	0.142461	5.67309	8.97628	4.11671	0.128138	0.831798	63.3
2000	1173	84.1547	229.814	-1.05818e+06	33.1091	121.744	3.12	56.3374	0.174556	16.631	1.14237	0.00654784	5.90163	0.144096	5.62086	8.92853	4.14224	0.129508	0.841343	62.9
2000	1172	83.212	227.234	-1.04609e+06	32.7517	120.317	3.128	56.3887	0.17634	16.6057	1.14801	0.00662202	5.92927	0.145728	5.56913	8.88114	4.16757	0.130875	0.850874	62.6
2000	1171	82.2915	224.713	-1.03429e+06	32.4026	118.924	3.137	56.4399	0.178118	16.5803	1.15361	0.0066961	5.9567	0.147359	5.51791	8.83411	4.19269	0.132238	0.860392	62.3
2000	1170	81.3923	222.251	-1.02276e+06	32.0617	117.564	3.145	56.4907	0.179892	16.5548	1.15918	0.00677007	5.98391	0.148986	5.46718	8.78742	4.2176	0.133598	0.869897	62
2000	1169	80.5138	219.845	-1.0115e+06	31.7284	116.236	3.154	56.5414	0.181662	16.5292	1.16472	0.00684394	6.01091	0.150612	5.41694	8.74109	4.24232	0.134955	0.879389	61.6
2000	1168	79.6552	217.493	-1.0005e+06	31.4027	114.938	3.162	56.5918	0.183427	16.5034	1.17024	0.00691771	6.03771	0.152235	5.36719	8.6951	4.26684	0.136308	0.888868	61.3
2000	1167	78.8159	215.194	-989740	31.0842	113.67	3.171	56.6419	0.185188	16.4775	1.17573	0.00699138	6.06431	0.153857	5.31791	8.64945	4.29116	0.137657	0.898334	61
2000	1166	77.9952	212.945	-979225	30.7728	112.43	3.179	56.6918	0.186944	16.4515	1.18119	0.00706495	6.0907	0.155476	5.26911	8.60414	4.31528	0.139003	0.907786	60.7
2000	1165	77.1924	210.746	-968941	30.4681	111.218	3.187	56.7415	0.188696	16.4254	1.18662	0.00713842	6.1169	0.157092	5.22077	8.55916	4.33922	0.140346	0.917226	60.3
2000	1164	76.3854	208.537	-958648	30.1625	110.002	3.196	56.7938	0.190495	16.3997	1.19134	0.00721383	6.1385	0.158752	5.17267	8.51498	4.36387	0.141724	0.926917	60
2000	1163	75.5906	206.363	-948511	29.8614	108.805	3.204	56.8462	0.192306	16.3733	1.19607	0.00728969	6.15981	0.160421	5.12444	8.47196	4.38845	0.143109	0.936663	59.7
2000	1162	74.8131	204.235	-938596	29.5669	107.634	3.213	56.8984	0.194114	16.3467	1.20077	0.00736545	6.18094	0.162089	5.07668	8.42924	4.41284	0.14449	0.946398	59.4
2000	1161	74.0523	202.153	-928896	29.2787	106.489	3.221	56.9503	0.195917	16.32	1.20546	0.00744111	6.20188	0.163754	5.02938	8.38683	4.43704	0.145867	0.95612	59.1
2000	1160	73.3078	200.115	-919405	28.9965	105.369	3.229	57.002	0.197716	16.2932	1.21012	0.00751669	6.22265	0.165417	4.98253	8.34471	4.46106	0.147242	0.965831	58.8
2000	1159	72.579	198.119	-910115	28.7203	104.272	3.238	57.0535	0.199511	16.2662	1.21476	0.00759217	6.24325	0.167078	4.93613	8.30289	4.48489	0.148613	0.97553	58.5
2000	1158	71.8653	196.166	-901020	28.4497	103.199	3.246	57.1048	0.201302	16.2392	1.21937	0.00766756	6.26368	0.168737	4.89018	8.26136	4.50854	0.149981	0.985217	58.2
2000	1157	71.1664	194.252	-892114	28.1847	102.148	3.254	57.1558	0.203089	16.212	1.22397	0.00774286	6.28393	0.170394	4.84467	8.22012	4.532	0.151346	0.994893	57.9
2000	1156	70.4818	192.376	-883391	27.9251	101.119	3.262	57.2066	0.204871	16.1848	1.22854	0.00781807	6.30402	0.172049	4.79959	8.17917	4.55529	0.152708	1.00456	57.6
2000	1155	69.811	190.539	-874846	27.6706	100.111	3.27	57.2572	0.20665	16.1574	1.2331	0.0078932	6.32395	0.173703	4.75493	8.13851	4.5784	0.154066	1.01421	57.3
2000	1154	69.1536	188.738	-866472	27.4212	99.1234	3.278	57.3076	0.208426	16.1299	1.23763	0.00796823	6.34372	0.175354	4.71071	8.09813	4.60134	0.155422	1.02385	57
2000	1153	68.5092	186.972	-858266	27.1767	98.1557	3.286	57.3577	0.210197	16.1023	1.24215	0.00804318	6.36333	0.177003	4.6669	8.05802	4.6241	0.156774	1.03348	56.6
2000	1152	67.8774	185.241	-850221	26.9369	97.2072	3.294	57.4077	0.211965	16.0746	1.24665	0.00811804	6.38278	0.178651	4.6235	8.0182	4.64668	0.158124	1.0431	56.3
2000	1151	67.2579	183.543	-842333	26.7017	96.2774	3.302	57.4574	0.213728	16.0468	1.25113	0.00819282	6.40208	0.180296	4.58051	7.97864	4.6691	0.15947	1.05271	56
2000	1150	66.6502	181.877	-834597	26.471	95.3656	3.31	57.5069	0.215489	16.0188	1.25559	0.00826751	6.42123	0.18194	4.53793	7.93936	4.69135	0.160813	1.06231	55.7
2000	1149	66.0541	180.243	-827010	26.2446	94.4715	3.317	57.5562	0.217245	15.9908	1.26003	0.00834213	6.44023	0.183582	4.49574	7.90035	4.71342	0.162153	1.07189	55.4
2000	1148	65.4692	178.639	-819566	26.0225	93.5944	3.325	57.6053	0.218998	15.9627	1.26445	0.00841665	6.45908	0.185222	4.45395	7.8616	4.73534	0.16349	1.08147	55.1
2000	1147	64.8952	177.065	-812261	25.8044	92.7339	3.333	57.6542	0.220748	15.9345	1.26886	0.0084911	6.47778	0.186861	4.41255	7.82312	4.75708	0.164824	1.09104	54.8
2000	1146	64.3318	175.52	-805093	25.5903	91.8895	3.34	57.7029	0.222494	15.9061	1.27325	0.00856547	6.49635	0.188497	4.37154	7.78489	4.77867	0.166156	1.10059	54.5
2000	1145	63.7786	174.003	-798056	25.3801	91.0608	3.348	57.7513	0.224236	15.8777	1.27763	0.00863976	6.51477	0.190132	4.3309	7.74693	4.80009	0.167484	1.11014	54.2
2000	1144	63.2355	172.513	-791147	25.1736	90.2473	3.355	57.7996	0.225976	15.8492	1.28199	0.00871397	6.53306	0.191765	4.29064	7.70922	4.82135	0.168809	1.11967	53.9
2000	1143	62.702	171.049	-784363	24.9708	89.4486	3.363	57.8477	0.227711	15.8206	1.28634	0.0087881	6.55121	0.193396	4.25076	7.67177	4.84245	0.170132	1.1292	53.6
2000	1142	62.1781	169.611	-777700	24.7715	88.6643	3.37	57.8955	0.229444	15.7919	1.29067	0.00886215	6.56922	0.195026	4.21124	7.63457	4.86339	0.171452	1.13871	53.3
2000	1141	61.6633	168.198	-771155	24.5757	87.894	3.377	57.9432	0.231173	15.7631	1.29498	0.00893613	6.5871	0.196654	4.17208	7.59761	4.88418	0.172768	1.14822	53
2000	1140	61.1575	166.81	-764724	24.3833	87.1373	3.385	57.9907	0.2329	15.7342	1.29928	0.00901004	6.60485	0.198281	4.13329	7.56091	4.90481	0.174082	1.15771	52.7
2000	1139	60.6604	165.445	-758406	24.1941	86.3939	3.392	58.0379	0.234623	15.7052	1.30357	0.00908387	6.62248	0.199905	4.09484	7.52444	4.92529	0.175394	1.1672	52.4
2000	1138	60.1719	164.103	-752196	24.0081	85.6634	3.399	58.085	0.236343	15.6762	1.30784	0.00915763	6.63997	0.201529	4.05675	7.48822	4.94561	0.176702	1.17668	52.1
2000	1137	59.6915	162.784	-746092	23.8253	84.9455	3.406	58.1319	0.238059	15.647	1.3121	0.00923132	6.65734	0.20315	4.01901	7.45224	4.96579	0.178008	1.18615	51.8
2000	1136	59.2193	161.487	-740091	23.6455	84.2398	3.414	58.1786	0.239773	15.6178	1.31635	0.00930494	6.67458	0.20477	3.98161	7.4165	4.98581	0.179311	1.19561	51.5
2000	1135	58.7549	160.212	-734191	23.4686	83.5461	3.421	58.2251	0.241484	15.5885	1.32058	0.00937849	6.6917	0.206389	3.94455	7.38099	5.00569	0.180611	1.20506	51.2
2000	1134	58.2981	158.957	-728388	23.2946	82.864	3.428	58.2714	0.243192	15.5591	1.3248	0.00945197	6.7087	0.208006	3.90783	7.34572	5.02542	0.181908	1.2145	50.9
2000	1133	57.8488	157.722	-722681	23.1234	82.1932	3.435	58.3175	0.244897	15.5296	1.32901	0.00952538	6.72558	0.209622	3.87143	7.31068	5.045	0.183203	1.22393	50.6
2000	1132	57.4067	156.507	-717067	22.9549	81.5335	3.442	58.3635	0.246599	15.5	1.33321	0.00959873	6.74235	0.211236	3.83537	7.27586	5.06444	0.184495	1.23336	50.3
2000	1131	56.9718	155.312	-711544	22.7891	80.8845	3.448	58.4092	0.248299	15.4704	1.33739	0.00967201	6.75899	0.212848	3.79963	7.24128	5.08374	0.185785	1.24277	50
2000	1130	56.5437	154.135	-706109	22.6259	80.246	3.455	58.4548	0.249996	15.4407	1.34157	0.00974523	6.77552	0.21446	3.76421	7.20692	5.10289	0.187072	1.25218	49.7
2000	1129	56.1224	152.977	-700760	22.4652	79.6178	3.462	58.5001	0.25169	15.4109	1.34573	0.00981839	6.79194	0.21607	3.7291	7.17278	5.1219	0.188356	1.26158	49.4
2000	1128	55.7077	151.836	-695496	22.3071	78.9995	3.469	58.5453	0.253381	15.381	1.34988	0.00989148	6.80825	0.217678	3.69432	7.13886	5.14078	0.189638	1.27097	49.2
2000	1127	55.2994	150.713	-690314	22.1513	78.3911	3.476	58.5904	0.25507	15.3511	1.35402	0.00996451	6.82444	0.219285	3.65984	7.10517	5.15951	0.190917	1.28036	48.9
2000	1126	54.8974	149.608	-685212	21.9979	77.7921	3.482	58.6352	0.256756	15.321	1.35815	0.0100375	6.84052	0.220891	3.62566	7.07169	5.17811	0.192194	1.28973	48.6
2000	1125	54.5015	148.519	-680188	21.8468	77.2024	3.489	58.6799	0.258439	15.291	1.36227	0.0101104	6.8565	0.222496	3.59179	7.03842	5.19657	0.193468	1.2991	48.3
2000	1124	54.1116	147.446	-675241	21.6979	76.6218	3.495	58.7244	0.26012	15.2608	1.36638	0.0101833	6.87237	0.224099	3.55822	7.00537	5.21489	0.194739	1.30846	48
2000	1123	53.7275	146.389	-670368	21.5512	76.0501	3.502	58.7687	0.261799	15.2306	1.37048	0.0102561	6.88813	0.225701	3.52495	6.97253	5.23309	0.196008	1.31782	47.7
2000	1122	53.3491	145.348	-665569	21.4067	75.487	3.508	58.8128	0.263475	15.2003	1.37457	0.0103288	6.90379	0.227302	3.49197	6.9399	5.25115	0.197275	1.32716	47.4
2000	1121	52.9763	144.321	-660841	21.2643	74.9323	3.515	58.8568	0.265149	15.1699	1.37865	0.0104015	6.91934	0.228902	3.45928	6.90748	5.26907	0.198539	1.3365	47.1
2000	1120	52.6089	143.31	-656182	21.1239	74.3859	3.521	58.9006	0.26682	15.1395	1.38273	0.0104741	6.9348	0.2305	3.42688	6.87526	5.28687	0.199801	1.34584	46.8
2000	1119	52.2468	142.313	-651591	20.9855	73.8476	3.528	58.9442	0.268489	15.109	1.38679	0.0105467	6.95015	0.232097	3.39476	6.84325	5.30454	0.201061	1.35516	46.5
2000	1118	51.89	141.331	-647067	20.8491	73.3172	3.534	58.9876	0.270156	15.0784	1.39084	0.0106192	6.9654	0.233693	3.36292	6.81144	5.32208	0.202318	1.36448	46.2
2000	1117	51.5382	140.362	-642608	20.7146	72.7945	3.54	59.0309	0.271821	15.0478	1.39489	0.0106917	6.98055	0.235288	3.33136	6.77983	5.33949	0.203572	1.37379	45.9
2000	1116	51.1914	139.407	-638212	20.582	72.2793	3.547	59.074	0.273483	15.0171	1.39893	0.0107641	6.9956	0.236882	3.30007	6.74842	5.35678	0.204825	1.3831	45.7
2000	1115	50.8495	138.465	-633879	20.4511	71.7715	3.553	59.117	0.275144	14.9864	1.40296	0.0108365	7.01055	0.238475	3.26906	6.71721	5.37394	0.206075	1.3924	45.4
2000	1114	50.5123	137.536	-629606	20.3221	71.2709	3.559	59.1598	0.276802	14.9556	1.40698	0.0109089	7.02541	0.240067	3.23831	6.68619	5.39097	0.207322	1.4017	45.1
2000	1113	50.1798	136.62	-625393	20.1949	70.7774	3.565	59.2024	0.278458	14.9247	1.41099	0.0109811	7.04017	0.241658	3.20783	6.65537	5.40789	0.208568	1.41098	44.8
2000	1112	49.8518	135.716	-621238	20.0693	70.2907	3.571	59.2449	0.280112	14.8938	1.41499	0.0110534	7.05484	0.243248	3.17761	6.62474	5.42468	0.209811	1.42027	44.5
2000	1111	49.5283	134.824	-617140	19.9455	69.8108	3.577	59.2872	0.281764	14.8628	1.41899	0.0111256	7.06942	0.244837	3.14766	6.59429	5.44135	0.211052	1.42954	44.2
2000	1110	49.2092	133.944	-613098	19.8232	69.3376	3.583	59.3293	0.283414	14.8318	1.42298	0.0111977	7.0839	0.246424	3.11796	6.56404	5.4579	0.212291	1.43882	43.9
2000	1109	48.8943	133.076	-609110	19.7026	68.8707	3.589	59.3713	0.285062	14.8007	1.42697	0.0112698	7.09829	0.248011	3.08851	6.53398	5.47433	0.213527	1.44808	43.7
2000	1108	48.5836	132.219	-605176	19.5836	68.4103	3.595	59.4131	0.286708	14.7695	1.43094	0.0113419	7.11258	0.249597	3.05932	6.5041	5.49064	0.214761	1.45734	43.4
2000	1107	48.277	131.374	-601294	19.4661	67.956	3.601	59.4548	0.288352	14.7383	1.43491	0.0114139	7.12679	0.251182	3.03038	6.47441	5.50684	0.215993	1.4666	43.1
2000	1106	47.9745	130.539	-597464	19.3501	67.5078	3.607	59.4963	0.289995	14.7071	1.43887	0.0114859	7.14091	0.252767	3.00168	6.44489	5.52292	0.217223	1.47585	42.8
2000	1105	47.6758	129.716	-593683	19.2356	67.0655	3.613	59.5377	0.291635	14.6758	1.44283	0.0115579	7.15494	0.25435	2.97323	6.41556	5.53888	0.218451	1.48509	42.5
2000	1104	47.381	128.902	-589952	19.1225	66.6291	3.618	59.5789	0.293274	14.6444	1.44678	0.0116298	7.16888	0.255933	2.94502	6.38641	5.55474	0.219677	1.49433	42.2
2000	1103	47.09	128.099	-586269	19.0108	66.1983	3.624	59.6199	0.294911	14.613	1.45072	0.0117017	7.18273	0.257515	2.91705	6.35744	5.57047	0.2209	1.50357	42
2000	1102	46.8026	127.306	-582633	18.9006	65.7732	3.63	59.6609	0.296547	14.5816	1.45466	0.0117735	7.1965	0.259096	2.88932	6.32865	5.5861	0.222122	1.5128	41.7
2000	1101	46.5189	126.523	-579043	18.7917	65.3535	3.635	59.7016	0.298181	14.5501	1.45859	0.0118453	7.21018	0.260676	2.86182	6.30003	5.60161	0.223341	1.52203	41.4
2000	1100	46.2387	125.75	-575499	18.6842	64.9392	3.641	59.7422	0.299813	14.5186	1.46251	0.0119171	7.22377	0.262255	2.83455	6.27158	5.61701	0.224558	1.53125	41.1
2000	1099	45.962	124.986	-571999	18.5779	64.5302	3.647	59.7827	0.301443	14.487	1.46643	0.0119888	7.23728	0.263834	2.80751	6.2433	5.6323	0.225773	1.54047	40.9
2000	1098	45.6888	124.231	-568543	18.473	64.1263	3.652	59.823	0.303072	14.4553	1.47035	0.0120606	7.25071	0.265412	2.7807	6.2152	5.64749	0.226987	1.54968	40.6
2000	1097	45.4188	123.486	-565129	18.3693	63.7274	3.658	59.8632	0.304699	14.4237	1.47425	0.0121322	7.26405	0.266989	2.75411	6.18727	5.66256	0.228198	1.55889	40.3
2000	1096	45.1522	122.749	-561757	18.2668	63.3336	3.663	59.9032	0.306325	14.3919	1.47816	0.0122039	7.2773	0.268566	2.72774	6.1595	5.67753	0.229407	1.5681	40
2000	1095	44.8887	122.022	-558427	18.1656	62.9446	3.669	59.9431	0.307949	14.3602	1.48205	0.0122755	7.29048	0.270142	2.7016	6.1319	5.69239	0.230614	1.5773	39.8
2000	1094	44.6285	121.303	-555136	18.0655	62.5603	3.674	59.9829	0.309572	14.3284	1.48595	0.0123471	7.30357	0.271718	2.67567	6.10447	5.70715	0.231819	1.5865	39.5
2000	1093	44.3713	120.592	-551886	17.9666	62.1808	3.679	60.0225	0.311194	14.2965	1.48983	0.0124187	7.31658	0.273293	2.64996	6.0772	5.7218	0.233023	1.59569	39.2
2000	1092	44.1172	119.89	-548674	17.8689	61.8058	3.685	60.0619	0.312813	14.2646	1.49371	0.0124902	7.32951	0.274867	2.62446	6.05009	5.73635	0.234224	1.60488	38.9
2000	1091	43.866	119.196	-545500	17.7723	61.4354	3.69	60.1013	0.314432	14.2327	1.49759	0.0125617	7.34236	0.276441	2.59917	6.02315	5.7508	0.235423	1.61407	38.7
2000	1090	43.6178	118.51	-542363	17.6768	61.0693	3.695	60.1405	0.316049	14.2008	1.50146	0.0126332	7.35513	0.278014	2.5741	5.99637	5.76514	0.236621	1.62326	38.4
2000	1089	43.3724	117.831	-539263	17.5823	60.7076	3.7	60.1795	0.317665	14.1688	1.50533	0.0127047	7.36782	0.279587	2.54923	5.96974	5.77938	0.237816	1.63244	38.1
2000	1088	43.1299	117.161	-536200	17.489	60.3502	3.705	60.2185	0.31928	14.1367	1.50919	0.0127761	7.38043	0.281159	2.52456	5.94327	5.79353	0.23901	1.64162	37.8
2000	1087	42.8901	116.498	-533171	17.3967	59.997	3.711	60.2572	0.320893	14.1046	1.51305	0.0128475	7.39296	0.282731	2.5001	5.91696	5.80757	0.240202	1.6508	37.6
2000	1086	42.6531	115.842	-530177	17.3054	59.6478	3.716	60.2959	0.322505	14.0725	1.5169	0.0129189	7.40542	0.284302	2.47584	5.8908	5.82151	0.241392	1.65997	37.3
2000	1085	42.4187	115.194	-527218	17.2151	59.3027	3.721	60.3344	0.324116	14.0404	1.52075	0.0129903	7.41779	0.285873	2.45177	5.8648	5.83536	0.24258	1.66915	37
2000	1084	42.1869	114.553	-524291	17.1258	58.9615	3.726	60.3728	0.325726	14.0082	1.52459	0.0130617	7.43009	0.287443	2.42791	5.83895	5.84911	0.243766	1.67832	36.8
2000	1083	41.9577	113.919	-521398	17.0375	58.6242	3.731	60.4111	0.327334	13.976	1.52843	0.013133	7.4423	0.289013	2.40423	5.81325	5.86276	0.244951	1.68748	36.5
2000	1082	41.7311	113.292	-518537	16.9501	58.2908	3.736	60.4492	0.328942	13.9438	1.53227	0.0132043	7.45444	0.290583	2.38076	5.78771	5.87631	0.246134	1.69665	36.2
2000	1081	41.5069	112.672	-515708	16.8637	57.961	3.741	60.4872	0.330548	13.9115	1.5361	0.0132757	7.46651	0.292152	2.35747	5.76231	5.88978	0.247315	1.70581	36
2000	1080	41.2852	112.058	-512910	16.7781	57.635	3.746	60.5251	0.332153	13.8792	1.53993	0.013347	7.4785	0.293721	2.33437	5.73706	5.90314	0.248494	1.71497	35.7
2000	1079	41.0659	111.451	-510142	16.6935	57.3126	3.75	60.5629	0.333757	13.8469	1.54375	0.0134182	7.49041	0.29529	2.31146	5.71195	5.91642	0.249671	1.72413	35.5
2000	1078	40.8489	110.85	-507405	16.6098	56.9937	3.755	60.6005	0.33536	13.8145	1.54757	0.0134895	7.50224	0.296859	2.28873	5.68699	5.9296	0.250847	1.73329	35.2
2000	1077	40.6343	110.256	-504697	16.527	56.6784	3.76	60.638	0.336962	13.7821	1.55138	0.0135608	7.514	0.298427	2.26619	5.66218	5.94269	0.252021	1.74244	34.9
2000	1076	40.4219	109.668	-502018	16.445	56.3664	3.765	60.6754	0.338563	13.7497	1.5552	0.013632	7.52568	0.299995	2.24383	5.63751	5.95569	0.253193	1.7516	34.7
2000	1075	40.2118	109.086	-499368	16.3639	56.0579	3.77	60.7127	0.340163	13.7172	1.559	0.0137032	7.53729	0.301562	2.22166	5.61298	5.96859	0.254364	1.76075	34.4
2000	1074	40.0039	108.51	-496746	16.2836	55.7526	3.774	60.7499	0.341763	13.6848	1.56281	0.0137745	7.54882	0.30313	2.19965	5.58859	5.98141	0.255533	1.7699	34.1
2000	1073	39.7981	107.94	-494151	16.2041	55.4507	3.779	60.7869	0.343361	13.6523	1.56661	0.0138457	7.56028	0.304697	2.17783	5.56435	5.99414	0.2567	1.77905	33.9
2000	1072	39.5945	107.376	-491584	16.1254	55.1519	3.784	60.8238	0.344958	13.6197	1.5704	0.0139169	7.57166	0.306264	2.15618	5.54024	6.00678	0.257865	1.7882	33.6
2000	1071	39.3929	106.818	-489044	16.0475	54.8563	3.788	60.8606	0.346554	13.5872	1.5742	0.0139881	7.58297	0.307831	2.13471	5.51627	6.01934	0.259029	1.79735	33.4
2000	1070	39.1934	106.265	-486530	15.9704	54.5638	3.793	60.8973	0.34815	13.5546	1.57799	0.0140593	7.5942	0.309397	2.1134	5.49244	6.0318	0.260191	1.8065	33.1
2000	1069	38.996	105.718	-484041	15.8941	54.2743	3.797	60.9338	0.349745	13.522	1.58177	0.0141305	7.60536	0.310964	2.09227	5.46874	6.04418	0.261352	1.81565	32.9
2000	1068	38.8005	105.177	-481578	15.8185	53.9878	3.802	60.9703	0.351338	13.4894	1.58555	0.0142016	7.61644	0.31253	2.0713	5.44518	6.05648	0.262511	1.82479	32.6
2000	1067	38.607	104.64	-479140	15.7436	53.7043	3.806	61.0066	0.352931	13.4567	1.58933	0.0142728	7.62745	0.314097	2.05051	5.42175	6.06869	0.263668	1.83394	32.4
2000	1066	38.4155	104.109	-476727	15.6695	53.4237	3.811	61.0429	0.354524	13.4241	1.59311	0.014344	7.63838	0.315663	2.02987	5.39845	6.08081	0.264824	1.84308	32.1
2000	1065	38.2258	103.583	-474338	15.5961	53.146	3.815	61.079	0.356115	13.3914	1.59688	0.0144152	7.64924	0.317229	2.00941	5.37529	6.09286	0.265978	1.85223	31.9
2000	1064	38.038	103.063	-471973	15.5234	52.871	3.819	61.115	0.357706	13.3587	1.60065	0.0144863	7.66003	0.318796	1.9891	5.35226	6.10482	0.267131	1.86137	31.6
2000	1063	37.852	102.547	-469631	15.4514	52.5988	3.824	61.1509	0.359296	13.326	1.60442	0.0145575	7.67074	0.320362	1.96895	5.32935	6.11669	0.268282	1.87052	31.4
2000	1062	37.6679	102.036	-467312	15.3801	52.3294	3.828	61.1867	0.360885	13.2932	1.60818	0.0146287	7.68137	0.321928	1.94897	5.30658	6.12849	0.269432	1.87966	31.1
2000	1061	37.4855	101.53	-465016	15.3095	52.0626	3.832	61.2223	0.362474	13.2605	1.61194	0.0146999	7.69194	0.323494	1.92914	5.28393	6.14021	0.27058	1.88881	30.9
2000	1060	37.3049	101.029	-462743	15.2395	51.7985	3.837	61.2579	0.364062	13.2277	1.61569	0.014771	7.70243	0.325061	1.90946	5.26141	6.15184	0.271726	1.89795	30.6
2000	1059	37.126	100.533	-460491	15.1702	51.5369	3.841	61.2934	0.365649	13.1949	1.61944	0.0148422	7.71284	0.326627	1.88995	5.23901	6.1634	0.272871	1.9071	30.4
2000	1058	36.9488	100.041	-458261	15.1015	51.2779	3.845	61.3288	0.367236	13.1621	1.62319	0.0149134	7.72318	0.328193	1.87058	5.21674	6.17488	0.274015	1.91625	30.1
2000	1057	36.7733	99.5544	-456053	15.0334	51.0215	3.849	61.364	0.368822	13.1292	1.62694	0.0149846	7.73345	0.32976	1.85137	5.1946	6.18628	0.275157	1.92539	29.9
2000	1056	36.5992	99.0714	-453864	14.966	50.7671	3.853	61.3994	0.370397	13.0964	1.63065	0.0149618	7.74346	0.331329	1.83228	5.17257	6.19763	0.276299	1.93455	29.6
2000	1055	36.4261	98.5914	-451691	14.8989	50.5144	3.858	61.4355	0.371937	13.0636	1.63428	0.0146771	7.75291	0.332903	1.81327	5.15065	6.20901	0.277444	1.94374	29.4
2000	1054	36.2546	98.1157	-449538	14.8325	50.264	3.862	61.4716	0.373473	13.0308	1.6379	0.0143928	7.76225	0.334478	1.79442	5.12885	6.22031	0.278589	1.95294	29.1
2000	1053	36.0847	97.6444	-447405	14.7667	50.016	3.866	61.5075	0.375006	12.998	1.64151	0.0141086	7.7715	0.336053	1.7757	5.10717	6.23154	0.279731	1.96213	28.9
2000	1052	35.9163	97.1773	-445293	14.7014	49.7704	3.87	61.5433	0.376537	12.9652	1.64511	0.0138245	7.78067	0.337628	1.75714	5.08561	6.2427	0.280873	1.97133	28.7
2000	1051	35.7495	96.7144	-443199	14.6368	49.527	3.874	61.5791	0.378064	12.9324	1.64871	0.0135406	7.78975	0.339204	1.73872	5.06417	6.25378	0.282013	1.98053	28.4
2000	1050	35.5841	96.2557	-441125	14.5727	49.2859	3.878	61.6148	0.379589	12.8996	1.65231	0.0132568	7.79874	0.34078	1.72044	5.04284	6.26479	0.283152	1.98973	28.2
2000	1049	35.4203	95.801	-439070	14.5091	49.0471	3.882	61.6504	0.381111	12.8667	1.65589	0.012973	7.80763	0.342356	1.7023	5.02164	6.27573	0.284289	1.99894	27.9
2000	1048	35.2579	95.3503	-437034	14.4462	48.8104	3.886	61.686	0.38263	12.8339	1.65948	0.0126893	7.81644	0.343933	1.68431	5.00054	6.2866	0.285426	2.00815	27.7
2000	1047	35.0969	94.9036	-435016	14.3837	48.5759	3.89	61.7214	0.384145	12.801	1.66305	0.0124055	7.82516	0.34551	1.66645	4.97956	6.2974	0.286561	2.01736	27.5
2000	1046	34.9374	94.4608	-433017	14.3219	48.3435	3.894	61.7568	0.385658	12.7681	1.66662	0.0121217	7.83378	0.347088	1.64874	4.95869	6.30813	0.287695	2.02657	27.2
2000	1045	34.7792	94.0219	-431035	14.2605	48.1132	3.898	61.7921	0.387166	12.7352	1.67018	0.0118379	7.84232	0.348666	1.63116	4.93794	6.31879	0.288827	2.03578	27
2000	1044	34.6225	93.5867	-429070	14.1997	47.885	3.902	61.8274	0.388672	12.7023	1.67374	0.0115541	7.85075	0.350245	1.61372	4.9173	6.32938	0.289959	2.045	26.8
2000	1043	34.4671	93.1552	-427124	14.1393	47.6588	3.906	61.8626	0.390173	12.6694	1.67729	0.0112701	7.8591	0.351824	1.59641	4.89677	6.3399	0.291089	2.05422	26.5
2000	1042	34.313	92.7274	-425194	14.0795	47.4346	3.91	61.8977	0.39167	12.6365	1.68083	0.0109861	7.86734	0.353404	1.57923	4.87634	6.35036	0.292218	2.06344	26.3
2000	1041	34.1602	92.3033	-423281	14.0202	47.2124	3.914	61.9327	0.393164	12.6036	1.68436	0.010702	7.87549	0.354985	1.56219	4.85603	6.36075	0.293346	2.07267	26.1
2000	1040	34.0088	91.8826	-421385	13.9614	46.9921	3.918	61.9677	0.394652	12.5706	1.68789	0.0104178	7.88354	0.356566	1.54528	4.83583	6.37108	0.294473	2.0819	25.9
2000	1039	33.8586	91.4656	-419505	13.9031	46.7738	3.921	62.0027	0.396137	12.5377	1.69141	0.0101334	7.89149	0.358147	1.5285	4.81573	6.38134	0.295598	2.09114	25.6
2000	1038	33.7096	91.0519	-417641	13.8452	46.5573	3.925	62.0375	0.397616	12.5048	1.69492	0.00984903	7.89934	0.35973	1.51185	4.79574	6.39154	0.296723	2.10038	25.4
2000	1037	33.5619	90.6417	-415793	13.7878	46.3427	3.929	62.0724	0.39909	12.4718	1.69842	0.00956455	7.90709	0.361313	1.49532	4.77585	6.40168	0.297847	2.10962	25.2
2000	1036	33.4155	90.2349	-413961	13.7309	46.13	3.933	62.1071	0.400559	12.4389	1.70192	0.00928001	7.91473	0.362896	1.47893	4.75607	6.41175	0.298969	2.11887	25
2000	1035	33.2702	89.8313	-412144	13.6745	45.919	3.936	62.1419	0.402022	12.4059	1.7054	0.00899546	7.92226	0.364481	1.46266	4.7364	6.42176	0.300091	2.12812	24.7
2000	1034	33.1261	89.4311	-410343	13.6185	45.7098	3.94	62.1765	0.403479	12.373	1.70888	0.00871093	7.92969	0.366066	1.44651	4.71682	6.43171	0.301211	2.13738	24.5
2000	1033	32.9832	89.034	-408556	13.5629	45.5024	3.944	62.2112	0.404929	12.34	1.71235	0.00842647	7.93701	0.367652	1.43049	4.69735	6.44161	0.30233	2.14664	24.3
2000	1032	32.8414	88.6401	-406785	13.5078	45.2967	3.947	62.2458	0.406373	12.3071	1.7158	0.00814214	7.94422	0.36924	1.41459	4.67798	6.45144	0.303449	2.1559	24.1
2000	1031	32.7008	88.2494	-405028	13.4531	45.0927	3.951	62.2803	0.407809	12.2741	1.71925	0.00785802	7.95131	0.370827	1.39882	4.65872	6.46121	0.304567	2.16518	23.8
2000	1030	32.5613	87.8617	-403285	13.3989	44.8904	3.955	62.3149	0.409238	12.2412	1.72269	0.00757419	7.95829	0.372416	1.38316	4.63955	6.47092	0.305683	2.17445	23.6
2000	1029	32.4229	87.4771	-401557	13.345	44.6897	3.958	62.3494	0.410659	12.2082	1.72611	0.00729076	7.96516	0.374006	1.36763	4.62048	6.48058	0.306799	2.18374	23.4
2000	1028	32.2855	87.0955	-399842	13.2916	44.4907	3.962	62.3838	0.412071	12.1752	1.72953	0.00700784	7.9719	0.375597	1.35221	4.6015	6.49018	0.307914	2.19302	23.2
2000	1027	32.1493	86.7168	-398142	13.2386	44.2933	3.965	62.4183	0.413474	12.1423	1.73293	0.00672556	7.97852	0.377189	1.33692	4.58263	6.49973	0.309028	2.20232	23
2000	1026	32.0141	86.3411	-396455	13.186	44.0974	3.969	62.4527	0.414868	12.1093	1.73632	0.00644408	7.98502	0.378782	1.32174	4.56385	6.50922	0.310141	2.21162	22.8
2000	1025	31.8799	85.9682	-394782	13.1338	43.9031	3.972	62.4871	0.416251	12.0764	1.7397	0.00616357	7.9914	0.380376	1.30667	4.54517	6.51865	0.311254	2.22093	22.5
2000	1024	31.7467	85.5981	-393121	13.082	43.7104	3.976	62.5215	0.417624	12.0434	1.74307	0.00588421	7.99764	0.381971	1.29173	4.52658	6.52804	0.312365	2.23024	22.3
2000	1023	31.6146	85.2308	-391474	13.0306	43.5191	3.979	62.5558	0.418985	12.0104	1.74642	0.00560622	8.00376	0.383568	1.2769	4.50809	6.53737	0.313476	2.23956	22.1
2000	1022	31.4835	84.8663	-389840	12.9795	43.3294	3.983	62.5902	0.420334	11.9775	1.74976	0.00532982	8.00974	0.385166	1.26218	4.48969	6.54664	0.314587	2.24889	21.9
2000	1021	31.3533	84.5045	-388218	12.9289	43.1411	3.986	62.6246	0.421671	11.9445	1.75308	0.00505527	8.01559	0.386765	1.24758	4.47138	6.55587	0.315696	2.25823	21.7
2000	1020	31.2241	84.1453	-386609	12.8786	42.9543	3.989	62.6589	0.422994	11.9116	1.75639	0.00478285	8.02129	0.388366	1.23308	4.45316	6.56505	0.316805	2.26758	21.5
2000	1019	31.0958	83.7887	-385012	12.8286	42.7688	3.993	62.6933	0.424302	11.8786	1.75968	0.00451286	8.02686	0.389968	1.21871	4.43504	6.57417	0.317914	2.27693	21.3
2000	1018	30.9685	83.4348	-383427	12.7791	42.5848	3.996	62.7277	0.425596	11.8457	1.76296	0.00424564	8.03229	0.391571	1.20444	4.417	6.58325	0.319022	2.28629	21.1
2000	1017	30.842	83.0834	-381855	12.7298	42.4022	3.999	62.762	0.426873	11.8127	1.76622	0.00398154	8.03756	0.393176	1.19028	4.39906	6.59228	0.320129	2.29566	20.9
2000	1016	30.7165	82.7345	-380294	12.681	42.2209	4.003	62.7964	0.428133	11.7798	1.76947	0.00372095	8.04269	0.394783	1.17623	4.3812	6.60127	0.321236	2.30504	20.7
2000	1015	30.5919	82.388	-378745	12.6325	42.041	4.006	62.8309	0.429375	11.7468	1.7727	0.00346428	8.04766	0.396391	1.1623	4.36343	6.6102	0.322343	2.31443	20.5
2000	1014	30.4682	82.0441	-377207	12.5843	41.8624	4.009	62.8653	0.430598	11.7139	1.7759	0.00321197	8.05247	0.398001	1.14847	4.34575	6.61909	0.323449	2.32383	20.3
2000	1013	30.3453	81.7025	-375680	12.5364	41.6851	4.013	62.8998	0.431801	11.681	1.77909	0.0029645	8.05713	0.399612	1.13474	4.32815	6.62794	0.324554	2.33324	20.1
2000	1012	30.2232	81.3632	-374165	12.4889	41.509	4.016	62.9343	0.432983	11.648	1.78226	0.00272237	8.06162	0.401226	1.12113	4.31064	6.63674	0.325659	2.34267	19.9
2000	1011	30.102	81.0264	-372661	12.4417	41.3343	4.019	62.9689	0.434142	11.6151	1.78541	0.00248611	8.06594	0.402841	1.10762	4.29322	6.6455	0.326764	2.3521	19.7
2000	1010	29.9817	80.6918	-371168	12.3949	41.1607	4.022	63.0035	0.435278	11.5822	1.78854	0.00225628	8.07009	0.404459	1.09422	4.27587	6.65422	0.327869	2.36154	19.5
2000	1009	29.8621	80.3594	-369685	12.3483	40.9884	4.025	63.0381	0.436388	11.5492	1.79165	0.00203348	8.07406	0.406078	1.08093	4.25861	6.66289	0.328974	2.37099	19.3
2000	1008	29.7434	80.0294	-368213	12.3021	40.8173	4.029	63.0729	0.437472	11.5163	1.79473	0.00181832	8.07785	0.407699	1.06774	4.24144	6.67153	0.330078	2.38046	19.1
2000	1007	29.6254	79.7015	-366751	12.2562	40.6474	4.032	63.1076	0.438527	11.4834	1.79779	0.00161146	8.08146	0.409323	1.05466	4.22434	6.68012	0.331182	2.38994	18.9
2000	1006	29.5082	79.3757	-365300	12.2105	40.4787	4.035	63.1425	0.439552	11.4505	1.80082	0.00141358	8.08488	0.410948	1.04168	4.20733	6.68868	0.332286	2.39943	18.7
2000	1005	29.3918	79.0521	-363859	12.1652	40.3111	4.038	63.1774	0.440546	11.4176	1.80383	0.00122537	8.08809	0.412576	1.0288	4.1904	6.6972	0.33339	2.40894	18.5
2000	1004	29.2761	78.7306	-362428	12.1202	40.1446	4.041	63.2124	0.441506	11.3847	1.80681	0.00104758	8.09111	0.414207	1.01603	4.17354	6.70568	0.334494	2.41846	18.3
2000	1003	29.1611	78.4111	-361006	12.0755	39.9793	4.044	63.2475	0.44243	11.3518	1.80976	0.000880942	8.09392	0.41584	1.00336	4.15677	6.71412	0.335599	2.42799	18.1
2000	1002	29.0469	78.0936	-359594	12.031	39.815	4.048	63.2828	0.443315	11.3189	1.81268	0.000726246	8.0965	0.417475	0.990798	4.14007	6.72254	0.336703	2.43754	17.9
2000	1001	28.9333	77.7782	-358192	11.9868	39.6518	4.051	63.3181	0.444158	11.286	1.81557	0.000584281	8.09886	0.419113	0.978336	4.12345	6.73092	0.337808	2.44711	17.7
2000	1000	28.8205	77.4646	-356799	11.9429	39.4897	4.054	63.3536	0.444955	11.2531	1.81843	0.000455855	8.10097	0.420754	0.965977	4.10691	6.73927	0.338913	2.45669	17.5
2000	999	28.7083	77.1529	-355415	11.8993	39.3285	4.057	63.3892	0.4457	11.2202	1.82124	0.000341784	8.10281	0.422399	0.953721	4.09044	6.74759	0.340019	2.46629	17.3
2000	998	28.5967	76.843	-354040	11.8559	39.1683	4.06	63.4251	0.446385	11.1873	1.82401	0.000242888	8.10436	0.424047	0.941569	4.07404	6.75588	0.341125	2.47591	17.2
2000	997	28.4858	76.5348	-352673	11.8128	39.0091	4.063	63.4612	0.446999	11.1545	1.82673	0.000159978	8.10557	0.425699	0.92952	4.05772	6.76416	0.342233	2.48556	17
2000	996	28.3753	76.2281	-351315	11.7699	38.8506	4.066	63.4977	0.447518	11.1216	1.82937	9.38387e-05	8.10635	0.427356	0.917578	4.04146	6.77243	0.343343	2.49523	16.8
2000	995	28.2652	75.9226	-349963	11.7272	38.6928	4.069	63.5348	0.447894	11.0887	1.83191	4.51824e-05	8.10651	0.42902	0.905746	4.02527	6.78072	0.344456	2.50495	16.6
2000	994	28.1551	75.6172	-348615	11.6845	38.535	4.072	63.5732	0.447989	11.0558	1.83424	1.45304e-05	8.10549	0.430698	0.894037	4.00911	6.78909	0.345577	2.51475	16.4
2000	993	28.0513	75.3273	-347316	11.6436	38.3856	4.075	63.6022	0.449936	11.023	1.83796	0	8.11191	0.432293	0.882239	3.99329	6.79652	0.346636	2.52406	16.2
2000	992	27.9221	74.9764	-345838	11.5962	38.2029	4.081	63.6756	0.443024	10.9899	1.83506	0	8.08251	0.434292	0.871432	3.97635	6.80814	0.34799	2.53573	16.1
2000	991	27.7936	74.6275	-344370	11.5491	38.0212	4.087	63.7497	0.436012	10.9567	1.83201	0	8.05238	0.436299	0.860761	3.95949	6.81976	0.349349	2.54745	16
2000	990	27.6664	74.2819	-342916	11.5024	37.8414	4.093	63.8236	0.429088	10.9236	1.82895	0	8.02232	0.438306	0.850205	3.94273	6.83129	0.350705	2.55916	15.9
2000	989	27.5404	73.9396	-341476	11.4562	37.6632	4.099	63.8973	0.422251	10.8905	1.82589	0	7.99231	0.440311	0.839763	3.92608	6.84274	0.352057	2.57087	15.8
2000	988	27.4156	73.6005	-340050	11.4104	37.4868	4.105	63.9707	0.415499	10.8573	1.82282	0	7.96235	0.442315	0.829432	3.90953	6.8541	0.353407	2.58257	15.7
2000	987	27.2921	73.2645	-338636	11.365	37.3122	4.111	64.0438	0.408831	10.8241	1.81975	0	7.93245	0.444318	0.819212	3.89309	6.86537	0.354754	2.59427	15.5
2000	986	27.1696	72.9317	-337237	11.32	37.1392	4.117	64.1167	0.402247	10.791	1.81667	0	7.9026	0.44632	0.809102	3.87674	6.87656	0.356098	2.60596	15.4
2000	985	27.0483	72.6019	-335850	11.2754	36.9678	4.122	64.1894	0.395746	10.7578	1.81358	0	7.87281	0.448321	0.799099	3.8605	6.88766	0.357439	2.61764	15.3
2000	984	26.9282	72.2752	-334476	11.2312	36.7981	4.128	64.2619	0.389326	10.7246	1.81048	0	7.84306	0.450322	0.789203	3.84435	6.89868	0.358778	2.62932	15.2
2000	983	26.8092	71.9514	-333114	11.1874	36.6299	4.134	64.3341	0.382987	10.6914	1.80738	0	7.81336	0.452321	0.779413	3.8283	6.90962	0.360114	2.641	15.1
2000	982	26.6912	71.6305	-331766	11.144	36.4634	4.14	64.4061	0.376728	10.6583	1.80427	0	7.78371	0.454319	0.769727	3.81235	6.92048	0.361447	2.65267	15
2000	981	26.5744	71.3125	-330429	11.1009	36.2984	4.145	64.4778	0.370548	10.6251	1.80115	0	7.75411	0.456317	0.760144	3.7965	6.93125	0.362777	2.66433	14.9
2000	980	26.4586	70.9974	-329105	11.0583	36.1349	4.151	64.5494	0.364446	10.5919	1.79802	0	7.72455	0.458314	0.750662	3.78074	6.94195	0.364104	2.67599	14.8
2000	979	26.3439	70.6851	-327792	11.016	35.973	4.156	64.6207	0.358421	10.5587	1.79488	0	7.69503	0.46031	0.741282	3.76508	6.95256	0.365429	2.68764	14.7
2000	978	26.2302	70.3756	-326491	10.974	35.8125	4.162	64.6918	0.352472	10.5255	1.79174	0	7.66555	0.462305	0.732001	3.7495	6.9631	0.366751	2.69929	14.5
2000	977	26.1176	70.0687	-325202	10.9325	35.6535	4.167	64.7627	0.346599	10.4923	1.78858	0	7.63612	0.464299	0.722818	3.73402	6.97356	0.36807	2.71093	14.4
2000	976	26.0059	69.7646	-323924	10.8912	35.496	4.172	64.8334	0.3408	10.4591	1.78542	0	7.60673	0.466292	0.713733	3.71864	6.98394	0.369387	2.72257	14.3
2000	975	25.8952	69.4631	-322658	10.8504	35.3399	4.178	64.9038	0.335076	10.426	1.78225	0	7.57738	0.468285	0.704744	3.70334	6.99424	0.370701	2.73421	14.2
2000	974	25.7856	69.1642	-321403	10.8099	35.1851	4.183	64.9741	0.329424	10.3928	1.77906	0	7.54806	0.470277	0.69585	3.68813	7.00447	0.372012	2.74584	14.1
2000	973	25.6768	68.8679	-320158	10.7697	35.0318	4.188	65.0442	0.323844	10.3596	1.77587	0	7.51878	0.472268	0.68705	3.67301	7.01462	0.373321	2.75746	14
2000	972	25.5691	68.5741	-318925	10.7298	34.8798	4.193	65.114	0.318336	10.3264	1.77267	0	7.48954	0.474258	0.678343	3.65798	7.0247	0.374627	2.76908	13.9
2000	971	25.4623	68.2829	-317702	10.6903	34.7292	4.198	65.1837	0.312899	10.2933	1.76946	0	7.46033	0.476248	0.669728	3.64304	7.03471	0.37593	2.7807	13.8
2000	970	25.3564	67.9941	-316490	10.6511	34.5799	4.204	65.2532	0.307532	10.2601	1.76623	0	7.43116	0.478237	0.661205	3.62818	7.04464	0.377231	2.79232	13.7
2000	969	25.2514	67.7077	-315288	10.6122	34.4319	4.209	65.3224	0.302234	10.2269	1.763	0	7.40202	0.480225	0.652771	3.61341	7.0545	0.378529	2.80392	13.6
2000	968	25.1473	67.4238	-314096	10.5737	34.2852	4.214	65.3915	0.297004	10.1938	1.75976	0	7.37291	0.482213	0.644426	3.59872	7.06429	0.379825	2.81553	13.5
2000	967	25.0441	67.1422	-312915	10.5355	34.1398	4.219	65.4604	0.291842	10.1607	1.7565	0	7.34384	0.4842	0.63617	3.58411	7.074	0.381118	2.82713	13.4
2000	966	24.9418	66.863	-311743	10.4975	33.9956	4.223	65.5291	0.286748	10.1275	1.75323	0	7.31479	0.486186	0.628001	3.56959	7.08365	0.382409	2.83873	13.3
2000	965	24.8403	66.586	-310582	10.4599	33.8526	4.228	65.5977	0.281719	10.0944	1.74995	0	7.28577	0.488172	0.619918	3.55514	7.09323	0.383696	2.85032	13.2
2000	964	24.7397	66.3114	-309430	10.4226	33.7109	4.233	65.666	0.276757	10.0613	1.74666	0	7.25678	0.490157	0.61192	3.54078	7.10273	0.384982	2.86191	13.1
2000	963	24.64	66.039	-308287	10.3856	33.5704	4.238	65.7342	0.271859	10.0282	1.74336	0	7.22782	0.492141	0.604007	3.5265	7.11217	0.386265	2.8735	13
2000	962	24.5411	65.7688	-307155	10.3488	33.4311	4.243	65.8022	0.267026	9.99509	1.74005	0	7.19889	0.494125	0.596178	3.5123	7.12154	0.387545	2.88508	12.9
2000	961	24.443	65.5008	-306031	10.3124	33.2929	4.247	65.87	0.262256	9.96201	1.73672	0	7.16998	0.496108	0.588431	3.49818	7.13085	0.388823	2.89666	12.8
2000	960	24.3457	65.235	-304917	10.2763	33.1559	4.252	65.9376	0.25755	9.92894	1.73338	0	7.1411	0.498091	0.580767	3.48413	7.14009	0.390098	2.90824	12.7
2000	959	24.2492	64.9713	-303812	10.2404	33.0201	4.257	66.0051	0.252905	9.89588	1.73003	0	7.11224	0.500073	0.573183	3.47016	7.14926	0.391371	2.91981	12.6
2000	958	24.1535	64.7098	-302716	10.2048	32.8854	4.261	66.0724	0.248323	9.86283	1.72666	0	7.0834	0.502054	0.56568	3.45627	7.15836	0.392642	2.93138	12.5
2000	957	24.0586	64.4503	-301628	10.1695	32.7518	4.266	66.1395	0.243802	9.8298	1.72328	0	7.05459	0.504035	0.558256	3.44245	7.1674	0.39391	2.94294	12.4
2000	956	23.9644	64.1928	-300550	10.1345	32.6193	4.27	66.2065	0.239342	9.79678	1.71989	0	7.0258	0.506015	0.550912	3.42871	7.17638	0.395175	2.9545	12.3
2000	955	23.871	63.9374	-299480	10.0997	32.4878	4.275	66.2733	0.234941	9.76378	1.71649	0	6.99703	0.507995	0.543645	3.41504	7.18529	0.396438	2.96606	12.2
2000	954	23.7784	63.684	-298419	10.0652	32.3575	4.279	66.3399	0.2306	9.73079	1.71307	0	6.96828	0.509974	0.536455	3.40145	7.19414	0.397698	2.97762	12.1
2000	953	23.6865	63.4326	-297366	10.0309	32.2282	4.283	66.4064	0.226317	9.69782	1.70963	0	6.93955	0.511952	0.529341	3.38792	7.20292	0.398957	2.98917	12
2000	952	23.5953	63.1831	-296322	9.99696	32.0999	4.288	66.4727	0.222093	9.66486	1.70619	0	6.91084	0.513931	0.522304	3.37447	7.21165	0.400212	3.00072	11.9
2000	951	23.5049	62.9356	-295286	9.96323	31.9727	4.292	66.5389	0.217927	9.63192	1.70273	0	6.88215	0.515908	0.515341	3.36109	7.22031	0.401465	3.01227	11.8
2000	950	23.4151	62.69	-294258	9.92976	31.8465	4.296	66.6049	0.213817	9.599	1.69925	0	6.85347	0.517885	0.508452	3.34778	7.22891	0.402716	3.02381	11.7
2000	949	23.3261	62.4463	-293238	9.89654	31.7213	4.301	66.6708	0.209764	9.56609	1.69576	0	6.82482	0.519862	0.501637	3.33453	7.23745	0.403965	3.03535	11.6
2000	948	23.2378	62.2044	-292227	9.86357	31.5971	4.305	66.7365	0.205767	9.5332	1.69225	0	6.79618	0.521838	0.494895	3.32136	7.24593	0.40521	3.04689	11.5
2000	947	23.1501	61.9644	-291223	9.83085	31.4739	4.309	66.802	0.201825	9.50033	1.68873	0	6.76755	0.523813	0.488225	3.30826	7.25435	0.406454	3.05842	11.4
2000	946	23.0632	61.7262	-290226	9.79836	31.3517	4.313	66.8675	0.197939	9.46748	1.68519	0	6.73894	0.525788	0.481627	3.29522	7.26271	0.407695	3.06996	11.3
2000	945	22.9769	61.4897	-289238	9.76612	31.2304	4.317	66.9327	0.194106	9.43465	1.68164	0	6.71035	0.527763	0.475099	3.28225	7.27101	0.408934	3.08148	11.2
2000	944	22.8913	61.2551	-288257	9.73411	31.1101	4.321	66.9978	0.190328	9.40184	1.67807	0	6.68176	0.529737	0.468642	3.26934	7.27925	0.41017	3.09301	11.1
2000	943	22.8063	61.0222	-287284	9.70234	30.9906	4.325	67.0628	0.186602	9.36905	1.67449	0	6.6532	0.53171	0.462254	3.2565	7.28744	0.411404	3.10453	11
2000	942	22.722	60.7911	-286318	9.6708	30.8722	4.329	67.1277	0.18293	9.33628	1.67089	0	6.62464	0.533683	0.455935	3.24372	7.29556	0.412636	3.11605	10.9
2000	941	22.6383	60.5617	-285359	9.63948	30.7546	4.333	67.1924	0.17931	9.30353	1.66727	0	6.5961	0.535656	0.449684	3.23101	7.30364	0.413865	3.12757	10.8
2000	940	22.5553	60.3339	-284408	9.6084	30.6379	4.337	67.2569	0.175741	9.2708	1.66364	0	6.56756	0.537628	0.443501	3.21836	7.31165	0.415092	3.13909	10.7
2000	939	22.4729	60.1079	-283464	9.57753	30.5222	4.341	67.3214	0.172224	9.2381	1.65999	0	6.53904	0.5396	0.437385	3.20578	7.31961	0.416316	3.1506	10.7
2000	938	22.3911	59.8835	-282527	9.54689	30.4073	4.344	67.3857	0.168758	9.20542	1.65633	0	6.51053	0.541571	0.431336	3.19325	7.32751	0.417538	3.16211	10.6
2000	937	22.3099	59.6607	-281597	9.51647	30.2933	4.348	67.4498	0.165342	9.17276	1.65264	0	6.48203	0.543542	0.425352	3.18079	7.33536	0.418758	3.17361	10.5
2000	936	22.2293	59.4396	-280674	9.48626	30.1801	4.352	67.5138	0.161975	9.14012	1.64894	0	6.45354	0.545512	0.419434	3.16838	7.34316	0.419975	3.18512	10.4
2000	935	22.1493	59.2201	-279758	9.45627	30.0678	4.356	67.5777	0.158658	9.10751	1.64522	0	6.42506	0.547481	0.413581	3.15604	7.3509	0.42119	3.19662	10.3
2000	934	22.07	59.0021	-278849	9.42649	29.9563	4.359	67.6415	0.15539	9.07493	1.64149	0	6.39658	0.549451	0.407792	3.14376	7.35858	0.422402	3.20812	10.2
2000	933	21.9912	58.7858	-277947	9.39692	29.8457	4.363	67.7052	0.152171	9.04237	1.63774	0	6.36812	0.551419	0.402066	3.13153	7.36621	0.423613	3.21961	10.1
2000	932	21.9129	58.5709	-277051	9.36756	29.7359	4.367	67.7687	0.148999	9.00983	1.63396	0	6.33966	0.553388	0.396404	3.11936	7.37379	0.424821	3.2311	10
2000	931	21.8353	58.3577	-276162	9.3384	29.6269	4.37	67.8321	0.145875	8.97732	1.63017	0	6.31121	0.555356	0.390804	3.10725	7.38132	0.426026	3.24259	9.9
2000	930	21.7582	58.1459	-275279	9.30944	29.5187	4.374	67.8953	0.142798	8.94484	1.62637	0	6.28276	0.557323	0.385267	3.0952	7.3888	0.427229	3.25408	9.9
2000	929	21.6817	57.9356	-274403	9.28069	29.4114	4.377	67.9585	0.139768	8.91238	1.62254	0	6.25432	0.55929	0.379791	3.0832	7.39622	0.42843	3.26556	9.8
2000	928	21.6057	57.7268	-273533	9.25214	29.3048	4.381	68.0215	0.136783	8.87995	1.61869	0	6.22589	0.561256	0.374376	3.07126	7.40359	0.429628	3.27704	9.7
2000	927	21.5303	57.5195	-272669	9.22378	29.1989	4.384	68.0844	0.133845	8.84755	1.61483	0	6.19746	0.563222	0.369021	3.05937	7.41091	0.430824	3.28852	9.6
2000	926	21.4554	57.3136	-271812	9.19562	29.0939	4.387	68.1472	0.130951	8.81518	1.61095	0	6.16904	0.565187	0.363727	3.04754	7.41818	0.432018	3.3	9.5
2000	925	21.3811	57.1092	-270961	9.16765	28.9896	4.391	68.2099	0.128103	8.78283	1.60704	0	6.14062	0.567152	0.358492	3.03576	7.4254	0.43321	3.31147	9.4
2000	924	21.3073	56.9062	-270116	9.13987	28.8861	4.394	68.2725	0.125299	8.75051	1.60312	0	6.11221	0.569117	0.353316	3.02404	7.43257	0.434399	3.32294	9.3
2000	923	21.234	56.7046	-269277	9.11228	28.7833	4.397	68.3349	0.122539	8.71823	1.59918	0	6.0838	0.571081	0.348199	3.01236	7.43969	0.435585	3.33441	9.3
2000	922	21.1613	56.5044	-268444	9.08487	28.6812	4.401	68.3973	0.119822	8.68597	1.59522	0	6.0554	0.573044	0.34314	3.00074	7.44676	0.436769	3.34587	9.2
2000	921	21.089	56.3056	-267617	9.05766	28.5799	4.404	68.4595	0.117149	8.65374	1.59124	0	6.02699	0.575007	0.338139	2.98917	7.45379	0.437951	3.35733	9.1
2000	920	21.0173	56.1082	-266796	9.03062	28.4793	4.407	68.5216	0.114518	8.62154	1.58724	0	5.99859	0.57697	0.333195	2.97765	7.46076	0.439131	3.36879	9
2000	919	20.9461	55.9121	-265981	9.00377	28.3795	4.41	68.5836	0.11193	8.58938	1.58321	0	5.9702	0.578932	0.328308	2.96618	7.46769	0.440308	3.38025	8.9
2000	918	20.8754	55.7173	-265172	8.9771	28.2803	4.413	68.6455	0.109384	8.55724	1.57917	0	5.9418	0.580893	0.323477	2.95476	7.47456	0.441483	3.3917	8.8
2000	917	20.8051	55.5239	-264368	8.95061	28.1818	4.416	68.7073	0.106879	8.52514	1.57511	0	5.91341	0.582854	0.318702	2.94339	7.4814	0.442656	3.40315	8.8
2000	916	20.7354	55.3317	-263570	8.92429	28.0841	4.42	68.769	0.104415	8.49306	1.57102	0	5.88502	0.584814	0.313983	2.93207	7.48818	0.443826	3.41459	8.7
2000	915	20.6661	55.1409	-262777	8.89815	27.987	4.423	68.8306	0.101992	8.46102	1.56692	0	5.85663	0.586774	0.309318	2.92079	7.49492	0.444993	3.42604	8.6
2000	914	20.5974	54.9514	-261990	8.87218	27.8906	4.426	68.8921	0.0996099	8.42902	1.56279	0	5.82824	0.588733	0.304709	2.90956	7.50161	0.446159	3.43748	8.5
2000	913	20.5291	54.7631	-261209	8.84638	27.7948	4.429	68.9535	0.0972672	8.39704	1.55865	0	5.79986	0.590692	0.300153	2.89838	7.50825	0.447322	3.44891	8.4
2000	912	20.4612	54.5761	-260433	8.82076	27.6998	4.431	69.0148	0.0949641	8.3651	1.55448	0	5.77147	0.59265	0.295651	2.88725	7.51485	0.448483	3.46035	8.4
2000	911	20.3939	54.3903	-259663	8.7953	27.6054	4.434	69.0759	0.0927002	8.33319	1.55029	0	5.74309	0.594608	0.291203	2.87616	7.5214	0.449641	3.47178	8.3
2000	910	20.327	54.2058	-258897	8.77	27.5116	4.437	69.137	0.090475	8.30132	1.54608	0	5.71471	0.596565	0.286807	2.86511	7.52791	0.450797	3.4832	8.2
2000	909	20.2605	54.0225	-258137	8.74488	27.4185	4.44	69.198	0.0882883	8.26948	1.54184	0	5.68633	0.598521	0.282465	2.85411	7.53437	0.45195	3.49463	8.1
2000	908	20.1945	53.8404	-257383	8.71992	27.326	4.443	69.2589	0.0861395	8.23768	1.53759	0	5.65795	0.600477	0.278174	2.84316	7.54078	0.453101	3.50605	8.1
2000	907	20.129	53.6595	-256633	8.69511	27.2342	4.446	69.3197	0.0840285	8.20591	1.53331	0	5.62957	0.602432	0.273935	2.83224	7.54716	0.45425	3.51746	8
2000	906	20.0639	53.4798	-255889	8.67048	27.143	4.448	69.3804	0.0819546	8.17418	1.52901	0	5.60119	0.604387	0.269748	2.82137	7.55348	0.455396	3.52887	7.9
2000	905	19.9992	53.3013	-255150	8.646	27.0524	4.451	69.441	0.0799177	8.14248	1.52469	0	5.57281	0.606341	0.265612	2.81055	7.55977	0.45654	3.54028	7.8
2000	904	19.935	53.1239	-254416	8.62167	26.9624	4.454	69.5015	0.0779173	8.11082	1.52034	0	5.54443	0.608294	0.261526	2.79976	7.56601	0.457681	3.55169	7.8
2000	903	19.8712	52.9477	-253686	8.59751	26.8731	4.457	69.562	0.0759531	8.07919	1.51597	0	5.51605	0.610247	0.257491	2.78902	7.5722	0.45882	3.56309	7.7
2000	902	19.8079	52.7727	-252962	8.5735	26.7843	4.459	69.6223	0.0740247	8.04761	1.51158	0	5.48767	0.612199	0.253505	2.77832	7.57836	0.459957	3.57449	7.6
2000	901	19.7449	52.5988	-252243	8.54964	26.6962	4.462	69.6825	0.0721317	8.01605	1.50717	0	5.45929	0.61415	0.249569	2.76765	7.58447	0.461091	3.58588	7.5
2000	900	19.6824	52.426	-251529	8.52594	26.6086	4.464	69.7427	0.0702737	7.98454	1.50273	0	5.43092	0.616101	0.245682	2.75703	7.59053	0.462223	3.59727	7.5
spinel_0	thermodynamic	data	and	composition:
Pressure	Temperature	mass	S	H	V	Cp	formula	SiO2	TiO2	Al2O3	Fe2O3	Cr2O3	FeO	MnO	MgO	CaO	Na2O	K2O	H2O
2000	1056	0.000152	0.00031	-0.916767	3.2e-05	0.000141	Fe''0.87Mg0.21Fe'''0.82Al0.39Cr0.63Ti0.08O4	0	3.12002	9.36985	31.1082	22.6479	29.7149	0	4.03916	0	0	0	0
2000	1055	0.000733	0.001497	-4.40956	0.000155	0.000678	Fe''0.88Mg0.21Fe'''0.83Al0.38Cr0.62Ti0.08O4	0	3.19359	9.27352	31.3461	22.3621	29.8294	0	3.99532	0	0	0	0
2000	1054	0.001324	0.002703	-7.93809	0.00028	0.001224	Fe''0.88Mg0.21Fe'''0.83Al0.38Cr0.61Ti0.09O4	0	3.26939	9.17632	31.5859	22.0713	29.9453	0	3.95176	0	0	0	0
2000	1053	0.001597	0.003258	-9.54325	0.000338	0.001475	Fe''0.88Mg0.20Fe'''0.84Al0.38Cr0.61Ti0.09O4	0	3.34751	9.07825	31.8276	21.7754	30.0627	0	3.90848	0	0	0	0
2000	1052	0.0016	0.003263	-9.53157	0.000338	0.001477	Fe''0.89Mg0.20Fe'''0.85Al0.37Cr0.60Ti0.09O4	0	3.42803	8.97928	32.0712	21.4743	30.1817	0	3.86547	0	0	0	0
2000	1051	0.001603	0.003269	-9.52185	0.000339	0.001479	Fe''0.89Mg0.20Fe'''0.86Al0.37Cr0.59Ti0.09O4	0	3.51104	8.87942	32.3165	21.1679	30.3024	0	3.82273	0	0	0	0
2000	1050	0.001607	0.003275	-9.51416	0.00034	0.001481	Fe''0.90Mg0.20Fe'''0.86Al0.36Cr0.58Ti0.10O4	0	3.59662	8.77866	32.5633	20.8564	30.4248	0	3.78026	0	0	0	0
2000	1049	0.001611	0.003283	-9.50859	0.00034	0.001484	Fe''0.90Mg0.20Fe'''0.87Al0.36Cr0.57Ti0.10O4	0	3.68485	8.677	32.8115	20.5396	30.549	0	3.73806	0	0	0	0
2000	1048	0.001615	0.003291	-9.50521	0.000341	0.001487	Fe''0.91Mg0.19Fe'''0.88Al0.36Cr0.56Ti0.10O4	0	3.77582	8.57444	33.0609	20.2177	30.675	0	3.69615	0	0	0	0
2000	1047	0.00162	0.0033	-9.50412	0.000342	0.00149	Fe''0.91Mg0.19Fe'''0.89Al0.35Cr0.56Ti0.10O4	0	3.8696	8.47101	33.3113	19.8905	30.803	0	3.65451	0	0	0	0
2000	1046	0.001625	0.00331	-9.5054	0.000343	0.001494	Fe''0.91Mg0.19Fe'''0.89Al0.35Cr0.55Ti0.11O4	0	3.96629	8.36672	33.5625	19.5583	30.9331	0	3.61315	0	0	0	0
2000	1045	0.001631	0.003321	-9.50915	0.000344	0.001499	Fe''0.92Mg0.19Fe'''0.90Al0.34Cr0.54Ti0.11O4	0	4.06595	8.26159	33.8142	19.2209	31.0653	0	3.57208	0	0	0	0
2000	1044	0.001637	0.003333	-9.51548	0.000345	0.001504	Fe''0.92Mg0.19Fe'''0.91Al0.34Cr0.53Ti0.11O4	0	4.16868	8.15564	34.0663	18.8785	31.1996	0	3.53131	0	0	0	0
2000	1043	0.001644	0.003345	-9.52448	0.000346	0.001509	Fe''0.93Mg0.18Fe'''0.92Al0.34Cr0.52Ti0.11O4	0	4.27454	8.04891	34.3183	18.5312	31.3362	0	3.49083	0	0	0	0
2000	1042	0.001651	0.003359	-9.53628	0.000348	0.001515	Fe''0.93Mg0.18Fe'''0.92Al0.33Cr0.51Ti0.12O4	0	4.38362	7.94144	34.5702	18.1791	31.4751	0	3.45065	0	0	0	0
2000	1041	0.001659	0.003374	-9.55099	0.000349	0.001521	Fe''0.94Mg0.18Fe'''0.93Al0.33Cr0.50Ti0.12O4	0	4.49599	7.83327	34.8214	17.8222	31.6163	0	3.41079	0	0	0	0
2000	1040	0.001667	0.00339	-9.56872	0.000351	0.001528	Fe''0.94Mg0.18Fe'''0.94Al0.32Cr0.49Ti0.12O4	0	4.61171	7.72445	35.0718	17.4608	31.7601	0	3.37124	0	0	0	0
2000	1039	0.001676	0.003408	-9.58962	0.000353	0.001535	Fe''0.95Mg0.18Fe'''0.95Al0.32Cr0.48Ti0.13O4	0	4.73085	7.61503	35.3209	17.0949	31.9063	0	3.33203	0	0	0	0
2000	1038	0.001686	0.003426	-9.6138	0.000354	0.001543	Fe''0.96Mg0.17Fe'''0.95Al0.32Cr0.47Ti0.13O4	0	4.85347	7.50508	35.5684	16.7248	32.055	0	3.29314	0	0	0	0
2000	1037	0.001696	0.003446	-9.64141	0.000356	0.001552	Fe''0.96Mg0.17Fe'''0.96Al0.31Cr0.46Ti0.13O4	0	4.97962	7.39466	35.814	16.3507	32.2064	0	3.25461	0	0	0	0
2000	1036	0.001707	0.003467	-9.67258	0.000359	0.001561	Fe''0.97Mg0.17Fe'''0.97Al0.31Cr0.45Ti0.14O4	0	5.10934	7.28383	36.0572	15.9727	32.3605	0	3.21643	0	0	0	0
2000	1035	0.001718	0.00349	-9.70746	0.000361	0.001571	Fe''0.97Mg0.17Fe'''0.98Al0.30Cr0.44Ti0.14O4	0	5.24268	7.17269	36.2978	15.5911	32.5172	0	3.17861	0	0	0	0
2000	1034	0.00173	0.003514	-9.74621	0.000363	0.001581	Fe''0.98Mg0.17Fe'''0.98Al0.30Cr0.43Ti0.14O4	0	5.37966	7.06129	36.5352	15.2061	32.6766	0	3.14117	0	0	0	0
2000	1033	0.001743	0.003539	-9.78896	0.000366	0.001593	Fe''0.98Mg0.17Fe'''0.99Al0.29Cr0.42Ti0.15O4	0	5.52031	6.94974	36.7691	14.818	32.8388	0	3.10411	0	0	0	0
2000	1032	0.001757	0.003566	-9.83588	0.000369	0.001605	Fe''0.99Mg0.16Fe'''1.00Al0.29Cr0.41Ti0.15O4	0	5.66464	6.8381	36.999	14.4271	33.0037	0	3.06744	0	0	0	0
2000	1031	0.001772	0.003595	-9.88712	0.000372	0.001617	Fe''0.99Mg0.16Fe'''1.00Al0.28Cr0.40Ti0.16O4	0	5.81264	6.72648	37.2247	14.0335	33.1714	0	3.03118	0	0	0	0
2000	1030	0.001787	0.003625	-9.94286	0.000375	0.001631	Fe''1.00Mg0.16Fe'''1.01Al0.28Cr0.39Ti0.16O4	0	5.96432	6.61497	37.4458	13.6378	33.3419	0	2.99533	0	0	0	0
2000	1029	0.001803	0.003657	-10.0032	0.000378	0.001645	Fe''1.01Mg0.16Fe'''1.02Al0.28Cr0.38Ti0.17O4	0	6.11965	6.50365	37.6617	13.24	33.5151	0	2.95989	0	0	0	0
2000	1028	0.00182	0.00369	-10.0685	0.000381	0.00166	Fe''1.01Mg0.16Fe'''1.02Al0.27Cr0.37Ti0.17O4	0	6.27861	6.39262	37.8722	12.8406	33.691	0	2.92489	0	0	0	0
2000	1027	0.001838	0.003726	-10.1387	0.000385	0.001676	Fe''1.02Mg0.16Fe'''1.03Al0.27Cr0.35Ti0.17O4	0	6.44114	6.28197	38.077	12.4399	33.8697	0	2.89032	0	0	0	0
2000	1026	0.001857	0.003763	-10.214	0.000389	0.001693	Fe''1.03Mg0.15Fe'''1.04Al0.26Cr0.34Ti0.18O4	0	6.60719	6.17181	38.2756	12.0382	34.051	0	2.85619	0	0	0	0
2000	1025	0.001877	0.003803	-10.2948	0.000393	0.00171	Fe''1.03Mg0.15Fe'''1.04Al0.26Cr0.33Ti0.18O4	0	6.77671	6.06222	38.4678	11.6358	34.235	0	2.8225	0	0	0	0
2000	1024	0.001898	0.003844	-10.381	0.000397	0.001729	Fe''1.04Mg0.15Fe'''1.05Al0.25Cr0.32Ti0.19O4	0	6.9496	5.95329	38.6532	11.2331	34.4215	0	2.78927	0	0	0	0
2000	1023	0.00192	0.003888	-10.4729	0.000402	0.001749	Fe''1.05Mg0.15Fe'''1.06Al0.25Cr0.31Ti0.19O4	0	7.12577	5.84512	38.8317	10.8304	34.6105	0	2.75649	0	0	0	0
2000	1022	0.001944	0.003933	-10.5707	0.000406	0.001769	Fe''1.05Mg0.15Fe'''1.06Al0.24Cr0.30Ti0.20O4	0	7.30513	5.73779	39.003	10.4281	34.8019	0	2.72417	0	0	0	0
2000	1021	0.001968	0.003981	-10.6746	0.000411	0.001791	Fe''1.06Mg0.15Fe'''1.07Al0.24Cr0.29Ti0.20O4	0	7.48756	5.63139	39.1668	10.0263	34.9956	0	2.6923	0	0	0	0
2000	1020	0.001993	0.004031	-10.7847	0.000417	0.001814	Fe''1.07Mg0.14Fe'''1.07Al0.24Cr0.28Ti0.21O4	0	7.67294	5.526	39.3231	9.62557	35.1915	0	2.6609	0	0	0	0
2000	1019	0.00202	0.004083	-10.9013	0.000422	0.001837	Fe''1.07Mg0.14Fe'''1.08Al0.23Cr0.26Ti0.21O4	0	7.86112	5.42169	39.4715	9.22609	35.3896	0	2.62995	0	0	0	0
2000	1018	0.002048	0.004138	-11.0245	0.000428	0.001862	Fe''1.08Mg0.14Fe'''1.08Al0.23Cr0.25Ti0.22O4	0	8.05196	5.31855	39.6122	8.8282	35.5897	0	2.59946	0	0	0	0
2000	1017	0.002077	0.004195	-11.1545	0.000434	0.001888	Fe''1.09Mg0.14Fe'''1.09Al0.22Cr0.24Ti0.22O4	0	8.2453	5.21663	39.7448	8.43219	35.7916	0	2.56943	0	0	0	0
2000	1016	0.002107	0.004255	-11.2916	0.00044	0.001916	Fe''1.09Mg0.14Fe'''1.09Al0.22Cr0.23Ti0.23O4	0	8.44098	5.11602	39.8695	8.03835	35.9953	0	2.53984	0	0	0	0
2000	1015	0.002139	0.004318	-11.4359	0.000446	0.001944	Fe''1.10Mg0.14Fe'''1.09Al0.21Cr0.22Ti0.24O4	0	8.63883	5.01676	39.9862	7.64693	36.2006	0	2.5107	0	0	0	0
2000	1014	0.002172	0.004383	-11.5878	0.000453	0.001974	Fe''1.11Mg0.13Fe'''1.10Al0.21Cr0.21Ti0.24O4	0	8.83866	4.91892	40.0949	7.25821	36.4073	0	2.48201	0	0	0	0
2000	1013	0.002206	0.004451	-11.7474	0.00046	0.002005	Fe''1.11Mg0.13Fe'''1.10Al0.21Cr0.20Ti0.25O4	0	9.04029	4.82254	40.1956	6.87243	36.6154	0	2.45375	0	0	0	0
2000	1012	0.002242	0.004522	-11.9152	0.000468	0.002038	Fe''1.12Mg0.13Fe'''1.10Al0.20Cr0.19Ti0.25O4	0	9.24352	4.72768	40.2885	6.48981	36.8246	0	2.42592	0	0	0	0
2000	1011	0.00228	0.004596	-12.0914	0.000476	0.002072	Fe''1.13Mg0.13Fe'''1.11Al0.20Cr0.18Ti0.26O4	0	9.44817	4.63437	40.3736	6.11058	37.0347	0	2.39852	0	0	0	0
2000	1010	0.002319	0.004673	-12.2765	0.000484	0.002107	Fe''1.14Mg0.13Fe'''1.11Al0.20Cr0.17Ti0.26O4	0	9.65402	4.54265	40.4511	5.73493	37.2457	0	2.37152	0	0	0	0
2000	1009	0.00236	0.004754	-12.471	0.000492	0.002144	Fe''1.14Mg0.13Fe'''1.11Al0.19Cr0.15Ti0.27O4	0	9.86088	4.45255	40.5212	5.36307	37.4574	0	2.34494	0	0	0	0
2000	1008	0.002403	0.004838	-12.6755	0.000501	0.002183	Fe''1.15Mg0.13Fe'''1.12Al0.19Cr0.14Ti0.28O4	0	10.0685	4.36411	40.5839	4.99515	37.6695	0	2.31875	0	0	0	0
2000	1007	0.002448	0.004926	-12.8908	0.00051	0.002224	Fe''1.16Mg0.12Fe'''1.12Al0.18Cr0.13Ti0.28O4	0	10.2768	4.27734	40.6396	4.63136	37.882	0	2.29295	0	0	0	0
2000	1006	0.002495	0.005019	-13.1181	0.00052	0.002267	Fe''1.16Mg0.12Fe'''1.12Al0.18Cr0.12Ti0.29O4	0	10.4854	4.19226	40.6884	4.27183	38.0945	0	2.26753	0	0	0	0
2000	1005	0.002545	0.005117	-13.3588	0.00053	0.002312	Fe''1.17Mg0.12Fe'''1.12Al0.18Cr0.11Ti0.29O4	0	10.6942	4.1089	40.7306	3.91671	38.3071	0	2.24249	0	0	0	0
2000	1004	0.002598	0.00522	-13.6148	0.000541	0.002359	Fe''1.18Mg0.12Fe'''1.12Al0.17Cr0.10Ti0.30O4	0	10.9029	4.02726	40.7665	3.56614	38.5194	0	2.2178	0	0	0	0
2000	1003	0.002654	0.00533	-13.889	0.000553	0.00241	Fe''1.19Mg0.12Fe'''1.12Al0.17Cr0.09Ti0.31O4	0	11.1114	3.94736	40.7963	3.22025	38.7312	0	2.19346	0	0	0	0
2000	1002	0.002714	0.005448	-14.1853	0.000566	0.002465	Fe''1.19Mg0.12Fe'''1.13Al0.17Cr0.08Ti0.31O4	0	11.3193	3.86921	40.8203	2.87916	38.9425	0	2.16947	0	0	0	0
2000	1001	0.00278	0.005577	-14.5098	0.000579	0.002525	Fe''1.20Mg0.12Fe'''1.13Al0.16Cr0.07Ti0.32O4	0	11.5265	3.79282	40.839	2.54301	39.1529	0	2.14581	0	0	0	0
2000	1000	0.002853	0.005721	-14.8719	0.000594	0.002591	Fe''1.21Mg0.12Fe'''1.13Al0.16Cr0.06Ti0.32O4	0	11.7326	3.71819	40.8525	2.21197	39.3623	0	2.12247	0	0	0	0
2000	999	0.002936	0.005884	-15.2872	0.000612	0.002666	Fe''1.21Mg0.11Fe'''1.13Al0.16Cr0.05Ti0.33O4	0	11.9374	3.64536	40.8613	1.88624	39.5702	0	2.09944	0	0	0	0
2000	998	0.003035	0.006078	-15.7828	0.000632	0.002756	Fe''1.22Mg0.11Fe'''1.13Al0.15Cr0.05Ti0.34O4	0	12.1404	3.57435	40.8659	1.56608	39.7765	0	2.07672	0	0	0	0
2000	997	0.003159	0.006323	-16.4111	0.000658	0.002869	Fe''1.23Mg0.11Fe'''1.13Al0.15Cr0.04Ti0.34O4	0	12.3411	3.50522	40.8669	1.25196	39.9806	0	2.0543	0	0	0	0
2000	996	0.003331	0.006662	-17.2852	0.000694	0.003025	Fe''1.24Mg0.11Fe'''1.13Al0.15Cr0.03Ti0.35O4	0	12.5384	3.43811	40.865	0.944674	40.1816	0	2.03217	0	0	0	0
2000	995	0.003607	0.00721	-18.7011	0.000751	0.003276	Fe''1.24Mg0.11Fe'''1.13Al0.15Cr0.02Ti0.35O4	0	12.7306	3.37332	40.8618	0.646028	40.3779	0	2.01032	0	0	0	0
2000	994	0.00419	0.008369	-21.7031	0.000873	0.003805	Fe''1.25Mg0.11Fe'''1.13Al0.14Cr0.01Ti0.36O4	0	12.9122	3.3118	40.8611	0.361319	40.5647	0	1.98878	0	0	0	0
2000	992	0.01867	0.037224	-96.489	0.003887	0.016951	Fe''1.26Mg0.11Fe'''1.14Al0.14Cr0.00Ti0.36O4	0	13.0802	3.22879	40.9791	0	40.7647	0	1.94722	0	0	0	0
2000	991	0.01987	0.039593	-102.557	0.004135	0.018037	Fe''1.25Mg0.11Fe'''1.14Al0.14Cr0.00Ti0.36O4	0	12.9896	3.22083	41.1526	0	40.7094	0	1.9275	0	0	0	0
2000	990	0.019648	0.039125	-101.271	0.004087	0.017832	Fe''1.25Mg0.10Fe'''1.15Al0.14Cr0.00Ti0.36O4	0	12.8989	3.21296	41.3264	0	40.6537	0	1.90797	0	0	0	0
2000	989	0.019429	0.038666	-100.01	0.004041	0.01763	Fe''1.25Mg0.10Fe'''1.15Al0.14Cr0.00Ti0.35O4	0	12.8081	3.20516	41.5005	0	40.5976	0	1.88864	0	0	0	0
2000	988	0.019215	0.038216	-98.7731	0.003995	0.017432	Fe''1.25Mg0.10Fe'''1.16Al0.14Cr0.00Ti0.35O4	0	12.7172	3.19744	41.6747	0	40.5412	0	1.8695	0	0	0	0
2000	987	0.019004	0.037773	-97.5599	0.00395	0.017237	Fe''1.25Mg0.10Fe'''1.16Al0.14Cr0.00Ti0.35O4	0	12.6261	3.1898	41.8492	0	40.4843	0	1.85055	0	0	0	0
2000	986	0.018797	0.037339	-96.3696	0.003905	0.017046	Fe''1.25Mg0.10Fe'''1.17Al0.14Cr0.00Ti0.35O4	0	12.535	3.18224	42.0239	0	40.4271	0	1.83179	0	0	0	0
2000	985	0.018594	0.036913	-95.2017	0.003862	0.016859	Fe''1.25Mg0.10Fe'''1.17Al0.14Cr0.00Ti0.35O4	0	12.4437	3.17475	42.1988	0	40.3695	0	1.81322	0	0	0	0
2000	984	0.018395	0.036494	-94.0557	0.003819	0.016675	Fe''1.24Mg0.10Fe'''1.18Al0.14Cr0.00Ti0.34O4	0	12.3524	3.16734	42.3739	0	40.3116	0	1.79483	0	0	0	0
2000	983	0.018199	0.036083	-92.931	0.003777	0.016494	Fe''1.24Mg0.10Fe'''1.18Al0.14Cr0.00Ti0.34O4	0	12.2609	3.16	42.5492	0	40.2533	0	1.77663	0	0	0	0
2000	982	0.018007	0.035679	-91.8271	0.003736	0.016316	Fe''1.24Mg0.10Fe'''1.19Al0.14Cr0.00Ti0.34O4	0	12.1694	3.15274	42.7246	0	40.1946	0	1.7586	0	0	0	0
2000	981	0.017818	0.035283	-90.7436	0.003696	0.016142	Fe''1.24Mg0.10Fe'''1.19Al0.14Cr0.00Ti0.34O4	0	12.0778	3.14555	42.9002	0	40.1357	0	1.74076	0	0	0	0
2000	980	0.017632	0.034893	-89.6799	0.003656	0.015971	Fe''1.24Mg0.09Fe'''1.20Al0.14Cr0.00Ti0.33O4	0	11.9861	3.13844	43.076	0	40.0763	0	1.72309	0	0	0	0
2000	979	0.01745	0.034511	-88.6356	0.003617	0.015803	Fe''1.24Mg0.09Fe'''1.20Al0.14Cr0.00Ti0.33O4	0	11.8944	3.13139	43.2519	0	40.0167	0	1.7056	0	0	0	0
2000	978	0.01727	0.034135	-87.6102	0.003579	0.015637	Fe''1.24Mg0.09Fe'''1.21Al0.14Cr0.00Ti0.33O4	0	11.8026	3.12442	43.428	0	39.9567	0	1.68828	0	0	0	0
2000	977	0.017094	0.033766	-86.6034	0.003541	0.015475	Fe''1.23Mg0.09Fe'''1.21Al0.14Cr0.00Ti0.33O4	0	11.7107	3.11752	43.6042	0	39.8965	0	1.67114	0	0	0	0
2000	976	0.016921	0.033403	-85.6146	0.003504	0.015315	Fe''1.23Mg0.09Fe'''1.22Al0.14Cr0.00Ti0.32O4	0	11.6188	3.11069	43.7805	0	39.8359	0	1.65416	0	0	0	0
2000	975	0.016751	0.033046	-84.6435	0.003468	0.015159	Fe''1.23Mg0.09Fe'''1.22Al0.14Cr0.00Ti0.32O4	0	11.5268	3.10393	43.9569	0	39.775	0	1.63736	0	0	0	0
2000	974	0.016584	0.032696	-83.6897	0.003432	0.015005	Fe''1.23Mg0.09Fe'''1.23Al0.14Cr0.00Ti0.32O4	0	11.4347	3.09724	44.1335	0	39.7138	0	1.62072	0	0	0	0
2000	973	0.016419	0.032351	-82.7528	0.003397	0.014853	Fe''1.23Mg0.09Fe'''1.23Al0.13Cr0.00Ti0.32O4	0	11.3426	3.09062	44.3101	0	39.6524	0	1.60425	0	0	0	0
2000	972	0.016258	0.032012	-81.8324	0.003362	0.014704	Fe''1.23Mg0.09Fe'''1.24Al0.13Cr0.00Ti0.31O4	0	11.2505	3.08406	44.4869	0	39.5906	0	1.58794	0	0	0	0
2000	971	0.016099	0.031679	-80.9281	0.003329	0.014558	Fe''1.22Mg0.09Fe'''1.24Al0.13Cr0.00Ti0.31O4	0	11.1583	3.07757	44.6637	0	39.5286	0	1.57179	0	0	0	0
2000	970	0.015942	0.031352	-80.0396	0.003295	0.014414	Fe''1.22Mg0.09Fe'''1.25Al0.13Cr0.00Ti0.31O4	0	11.0661	3.07115	44.8406	0	39.4663	0	1.55581	0	0	0	0
2000	969	0.015789	0.03103	-79.1665	0.003262	0.014273	Fe''1.22Mg0.09Fe'''1.25Al0.13Cr0.00Ti0.31O4	0	10.9738	3.06479	45.0176	0	39.4038	0	1.53998	0	0	0	0
2000	968	0.015638	0.030714	-78.3085	0.00323	0.014133	Fe''1.22Mg0.08Fe'''1.26Al0.13Cr0.00Ti0.30O4	0	10.8815	3.0585	45.1947	0	39.341	0	1.52431	0	0	0	0
2000	967	0.015489	0.030403	-77.4654	0.003199	0.013997	Fe''1.22Mg0.08Fe'''1.27Al0.13Cr0.00Ti0.30O4	0	10.7892	3.05227	45.3718	0	39.2779	0	1.5088	0	0	0	0
2000	966	0.015343	0.030097	-76.6367	0.003167	0.013862	Fe''1.22Mg0.08Fe'''1.27Al0.13Cr0.00Ti0.30O4	0	10.6969	3.04611	45.5489	0	39.2146	0	1.49344	0	0	0	0
2000	965	0.015199	0.029796	-75.8221	0.003137	0.01373	Fe''1.21Mg0.08Fe'''1.28Al0.13Cr0.00Ti0.30O4	0	10.6046	3.04	45.7261	0	39.1511	0	1.47823	0	0	0	0
2000	964	0.015058	0.0295	-75.0214	0.003107	0.0136	Fe''1.21Mg0.08Fe'''1.28Al0.13Cr0.00Ti0.29O4	0	10.5122	3.03396	45.9033	0	39.0873	0	1.46317	0	0	0	0
2000	963	0.014918	0.029209	-74.2343	0.003077	0.013472	Fe''1.21Mg0.08Fe'''1.29Al0.13Cr0.00Ti0.29O4	0	10.4199	3.02798	46.0805	0	39.0233	0	1.44827	0	0	0	0
2000	962	0.014782	0.028922	-73.4605	0.003048	0.013346	Fe''1.21Mg0.08Fe'''1.29Al0.13Cr0.00Ti0.29O4	0	10.3275	3.02207	46.2578	0	38.9591	0	1.43351	0	0	0	0
2000	961	0.014647	0.02864	-72.6997	0.003019	0.013222	Fe''1.21Mg0.08Fe'''1.30Al0.13Cr0.00Ti0.29O4	0	10.2352	3.01621	46.435	0	38.8947	0	1.4189	0	0	0	0
2000	960	0.014514	0.028363	-71.9517	0.002991	0.0131	Fe''1.21Mg0.08Fe'''1.30Al0.13Cr0.00Ti0.28O4	0	10.1428	3.01041	46.6122	0	38.8301	0	1.40443	0	0	0	0
2000	959	0.014384	0.02809	-71.2161	0.002963	0.01298	Fe''1.20Mg0.08Fe'''1.31Al0.13Cr0.00Ti0.28O4	0	10.0505	3.00467	46.7895	0	38.7652	0	1.39011	0	0	0	0
2000	958	0.014256	0.027822	-70.4928	0.002936	0.012862	Fe''1.20Mg0.08Fe'''1.31Al0.13Cr0.00Ti0.28O4	0	9.95818	2.99899	46.9667	0	38.7002	0	1.37592	0	0	0	0
2000	957	0.014129	0.027558	-69.7815	0.002909	0.012746	Fe''1.20Mg0.08Fe'''1.32Al0.13Cr0.00Ti0.28O4	0	9.86588	2.99336	47.1439	0	38.635	0	1.36188	0	0	0	0
2000	956	0.014005	0.027298	-69.0819	0.002883	0.012632	Fe''1.20Mg0.07Fe'''1.32Al0.13Cr0.00Ti0.27O4	0	9.7736	2.98779	47.321	0	38.5696	0	1.34798	0	0	0	0
2000	955	0.013883	0.027042	-68.3939	0.002857	0.012519	Fe''1.20Mg0.07Fe'''1.33Al0.13Cr0.00Ti0.27O4	0	9.68135	2.98227	47.4981	0	38.504	0	1.33422	0	0	0	0
2000	954	0.013763	0.026791	-67.7172	0.002831	0.012409	Fe''1.19Mg0.07Fe'''1.33Al0.13Cr0.00Ti0.27O4	0	9.58913	2.97681	47.6752	0	38.4383	0	1.32059	0	0	0	0
2000	953	0.013644	0.026543	-67.0515	0.002806	0.0123	Fe''1.19Mg0.07Fe'''1.34Al0.13Cr0.00Ti0.27O4	0	9.49694	2.97141	47.8522	0	38.3724	0	1.3071	0	0	0	0
2000	952	0.013527	0.026299	-66.3967	0.002781	0.012192	Fe''1.19Mg0.07Fe'''1.34Al0.13Cr0.00Ti0.26O4	0	9.4048	2.96605	48.0291	0	38.3063	0	1.29374	0	0	0	0
2000	951	0.013413	0.026059	-65.7526	0.002757	0.012087	Fe''1.19Mg0.07Fe'''1.35Al0.13Cr0.00Ti0.26O4	0	9.3127	2.96075	48.206	0	38.2401	0	1.28052	0	0	0	0
2000	950	0.0133	0.025823	-65.119	0.002733	0.011983	Fe''1.19Mg0.07Fe'''1.35Al0.13Cr0.00Ti0.26O4	0	9.22065	2.9555	48.3827	0	38.1737	0	1.26742	0	0	0	0
2000	949	0.013188	0.025591	-64.4956	0.002709	0.011881	Fe''1.19Mg0.07Fe'''1.36Al0.13Cr0.00Ti0.26O4	0	9.12865	2.9503	48.5594	0	38.1072	0	1.25446	0	0	0	0
2000	948	0.013079	0.025362	-63.8823	0.002686	0.01178	Fe''1.18Mg0.07Fe'''1.36Al0.13Cr0.00Ti0.25O4	0	9.03672	2.94515	48.736	0	38.0405	0	1.24162	0	0	0	0
2000	947	0.012971	0.025136	-63.2788	0.002663	0.011681	Fe''1.18Mg0.07Fe'''1.37Al0.13Cr0.00Ti0.25O4	0	8.94484	2.94005	48.9125	0	37.9737	0	1.22891	0	0	0	0
2000	946	0.012865	0.024915	-62.6851	0.002641	0.011584	Fe''1.18Mg0.07Fe'''1.38Al0.13Cr0.00Ti0.25O4	0	8.85304	2.93499	49.0888	0	37.9068	0	1.21632	0	0	0	0
2000	945	0.01276	0.024696	-62.1009	0.002618	0.011488	Fe''1.18Mg0.07Fe'''1.38Al0.13Cr0.00Ti0.25O4	0	8.76131	2.92998	49.265	0	37.8398	0	1.20386	0	0	0	0
2000	944	0.012658	0.024481	-61.5261	0.002597	0.011393	Fe''1.18Mg0.07Fe'''1.39Al0.13Cr0.00Ti0.24O4	0	8.66965	2.92502	49.4411	0	37.7727	0	1.19153	0	0	0	0
2000	943	0.012556	0.02427	-60.9604	0.002575	0.0113	Fe''1.17Mg0.07Fe'''1.39Al0.13Cr0.00Ti0.24O4	0	8.57808	2.9201	49.617	0	37.7055	0	1.17931	0	0	0	0
2000	942	0.012456	0.024061	-60.4038	0.002554	0.011208	Fe''1.17Mg0.06Fe'''1.40Al0.13Cr0.00Ti0.24O4	0	8.4866	2.91523	49.7928	0	37.6382	0	1.16722	0	0	0	0
2000	941	0.012358	0.023856	-59.856	0.002533	0.011118	Fe''1.17Mg0.06Fe'''1.40Al0.13Cr0.00Ti0.24O4	0	8.39521	2.91039	49.9684	0	37.5708	0	1.15525	0	0	0	0
2000	940	0.012262	0.023654	-59.3169	0.002513	0.011029	Fe''1.17Mg0.06Fe'''1.41Al0.13Cr0.00Ti0.23O4	0	8.30392	2.9056	50.1438	0	37.5033	0	1.14339	0	0	0	0
2000	939	0.012166	0.023455	-58.7864	0.002492	0.010942	Fe''1.17Mg0.06Fe'''1.41Al0.13Cr0.00Ti0.23O4	0	8.21273	2.90085	50.3191	0	37.4357	0	1.13165	0	0	0	0
2000	938	0.012073	0.023259	-58.2643	0.002473	0.010856	Fe''1.17Mg0.06Fe'''1.42Al0.13Cr0.00Ti0.23O4	0	8.12165	2.89614	50.4941	0	37.368	0	1.12003	0	0	0	0
2000	937	0.01198	0.023066	-57.7505	0.002453	0.010771	Fe''1.16Mg0.06Fe'''1.42Al0.13Cr0.00Ti0.23O4	0	8.03068	2.89147	50.669	0	37.3003	0	1.10852	0	0	0	0
2000	936	0.011889	0.022876	-57.2448	0.002434	0.010687	Fe''1.16Mg0.06Fe'''1.43Al0.13Cr0.00Ti0.22O4	0	7.93984	2.88684	50.8436	0	37.2326	0	1.09713	0	0	0	0
2000	935	0.0118	0.022689	-56.747	0.002415	0.010605	Fe''1.16Mg0.06Fe'''1.43Al0.13Cr0.00Ti0.22O4	0	7.84912	2.88224	51.018	0	37.1648	0	1.08585	0	0	0	0
2000	934	0.011712	0.022504	-56.2572	0.002396	0.010524	Fe''1.16Mg0.06Fe'''1.44Al0.13Cr0.00Ti0.22O4	0	7.75853	2.87767	51.1922	0	37.0969	0	1.07468	0	0	0	0
2000	933	0.011625	0.022323	-55.775	0.002378	0.010444	Fe''1.16Mg0.06Fe'''1.44Al0.13Cr0.00Ti0.22O4	0	7.66808	2.87314	51.3662	0	37.029	0	1.06362	0	0	0	0
2000	932	0.011539	0.022144	-55.3005	0.00236	0.010366	Fe''1.15Mg0.06Fe'''1.45Al0.13Cr0.00Ti0.21O4	0	7.57777	2.86865	51.5398	0	36.9611	0	1.05267	0	0	0	0
2000	931	0.011455	0.021968	-54.8334	0.002342	0.010288	Fe''1.15Mg0.06Fe'''1.45Al0.13Cr0.00Ti0.21O4	0	7.48761	2.86418	51.7132	0	36.8931	0	1.04183	0	0	0	0
2000	930	0.011372	0.021795	-54.3737	0.002324	0.010212	Fe''1.15Mg0.06Fe'''1.46Al0.13Cr0.00Ti0.21O4	0	7.39761	2.85975	51.8864	0	36.8252	0	1.03109	0	0	0	0
2000	929	0.011291	0.021624	-53.9212	0.002307	0.010137	Fe''1.15Mg0.06Fe'''1.46Al0.13Cr0.00Ti0.21O4	0	7.30777	2.85534	52.0592	0	36.7572	0	1.02046	0	0	0	0
2000	928	0.01121	0.021456	-53.4758	0.00229	0.010063	Fe''1.15Mg0.06Fe'''1.47Al0.13Cr0.00Ti0.20O4	0	7.2181	2.85096	52.2318	0	36.6892	0	1.00994	0	0	0	0
2000	927	0.011131	0.021291	-53.0374	0.002273	0.00999	Fe''1.14Mg0.06Fe'''1.47Al0.13Cr0.00Ti0.20O4	0	7.12861	2.84661	52.404	0	36.6213	0	0.999523	0	0	0	0
2000	926	0.011053	0.021128	-52.6059	0.002257	0.009919	Fe''1.14Mg0.06Fe'''1.48Al0.13Cr0.00Ti0.20O4	0	7.03929	2.84228	52.5759	0	36.5533	0	0.989208	0	0	0	0
2000	925	0.010976	0.020967	-52.1812	0.00224	0.009848	Fe''1.14Mg0.05Fe'''1.48Al0.13Cr0.00Ti0.20O4	0	6.95017	2.83797	52.7475	0	36.4854	0	0.978995	0	0	0	0
2000	924	0.010901	0.020809	-51.7632	0.002225	0.009779	Fe''1.14Mg0.05Fe'''1.49Al0.12Cr0.00Ti0.19O4	0	6.86124	2.83369	52.9187	0	36.4175	0	0.968883	0	0	0	0
2000	923	0.010826	0.020653	-51.3517	0.002209	0.00971	Fe''1.14Mg0.05Fe'''1.49Al0.12Cr0.00Ti0.19O4	0	6.77252	2.82943	53.0895	0	36.3497	0	0.958872	0	0	0	0
2000	922	0.010753	0.0205	-50.9467	0.002193	0.009643	Fe''1.14Mg0.05Fe'''1.50Al0.12Cr0.00Ti0.19O4	0	6.68401	2.82518	53.26	0	36.2819	0	0.94896	0	0	0	0
2000	921	0.010681	0.020349	-50.5481	0.002178	0.009577	Fe''1.13Mg0.05Fe'''1.50Al0.12Cr0.00Ti0.19O4	0	6.59571	2.82095	53.4301	0	36.2141	0	0.939146	0	0	0	0
2000	920	0.01061	0.0202	-50.1557	0.002163	0.009511	Fe''1.13Mg0.05Fe'''1.51Al0.12Cr0.00Ti0.18O4	0	6.50765	2.81674	53.5998	0	36.1464	0	0.92943	0	0	0	0
2000	919	0.01054	0.020053	-49.7695	0.002148	0.009447	Fe''1.13Mg0.05Fe'''1.51Al0.12Cr0.00Ti0.18O4	0	6.41981	2.81255	53.769	0	36.0788	0	0.919811	0	0	0	0
2000	918	0.010471	0.019909	-49.3894	0.002134	0.009384	Fe''1.13Mg0.05Fe'''1.52Al0.12Cr0.00Ti0.18O4	0	6.33222	2.80836	53.9379	0	36.0113	0	0.910287	0	0	0	0
2000	917	0.010403	0.019767	-49.0152	0.002119	0.009321	Fe''1.13Mg0.05Fe'''1.52Al0.12Cr0.00Ti0.18O4	0	6.24488	2.80419	54.1063	0	35.9438	0	0.900858	0	0	0	0
2000	916	0.010336	0.019627	-48.647	0.002105	0.00926	Fe''1.12Mg0.05Fe'''1.53Al0.12Cr0.00Ti0.17O4	0	6.1578	2.80003	54.2742	0	35.8765	0	0.891523	0	0	0	0
2000	915	0.010271	0.019489	-48.2846	0.002091	0.009199	Fe''1.12Mg0.05Fe'''1.53Al0.12Cr0.00Ti0.17O4	0	6.07098	2.79587	54.4416	0	35.8092	0	0.882282	0	0	0	0
2000	914	0.010206	0.019354	-47.9278	0.002078	0.00914	Fe''1.12Mg0.05Fe'''1.54Al0.12Cr0.00Ti0.17O4	0	5.98445	2.79172	54.6086	0	35.7421	0	0.873132	0	0	0	0
2000	913	0.010142	0.01922	-47.5767	0.002064	0.009081	Fe''1.12Mg0.05Fe'''1.54Al0.12Cr0.00Ti0.17O4	0	5.89819	2.78758	54.7751	0	35.6751	0	0.864075	0	0	0	0
2000	912	0.01008	0.019088	-47.2312	0.002051	0.009024	Fe''1.12Mg0.05Fe'''1.55Al0.12Cr0.00Ti0.16O4	0	5.81223	2.78344	54.941	0	35.6082	0	0.855107	0	0	0	0
2000	911	0.010018	0.018959	-46.8911	0.002038	0.008967	Fe''1.11Mg0.05Fe'''1.55Al0.12Cr0.00Ti0.16O4	0	5.72658	2.77929	55.1064	0	35.5415	0	0.84623	0	0	0	0
2000	910	0.009957	0.018831	-46.5563	0.002025	0.008911	Fe''1.11Mg0.05Fe'''1.56Al0.12Cr0.00Ti0.16O4	0	5.64124	2.77515	55.2713	0	35.4749	0	0.837442	0	0	0	0
2000	909	0.009897	0.018705	-46.2269	0.002013	0.008856	Fe''1.11Mg0.05Fe'''1.56Al0.12Cr0.00Ti0.16O4	0	5.55622	2.771	55.4355	0	35.4085	0	0.828742	0	0	0	0
2000	908	0.009838	0.018582	-45.9026	0.002	0.008802	Fe''1.11Mg0.05Fe'''1.57Al0.12Cr0.00Ti0.15O4	0	5.47153	2.76685	55.5992	0	35.3423	0	0.82013	0	0	0	0
2000	907	0.00978	0.01846	-45.5835	0.001988	0.008748	Fe''1.11Mg0.05Fe'''1.57Al0.12Cr0.00Ti0.15O4	0	5.38719	2.7627	55.7623	0	35.2762	0	0.811604	0	0	0	0
2000	906	0.009723	0.01834	-45.2694	0.001976	0.008696	Fe''1.10Mg0.04Fe'''1.58Al0.12Cr0.00Ti0.15O4	0	5.3032	2.75853	55.9247	0	35.2104	0	0.803165	0	0	0	0
2000	905	0.009667	0.018221	-44.9603	0.001964	0.008644	Fe''1.10Mg0.04Fe'''1.58Al0.12Cr0.00Ti0.15O4	0	5.21957	2.75435	56.0866	0	35.1447	0	0.794811	0	0	0	0
2000	904	0.009612	0.018105	-44.6561	0.001952	0.008593	Fe''1.10Mg0.04Fe'''1.59Al0.12Cr0.00Ti0.14O4	0	5.13631	2.75016	56.2477	0	35.0793	0	0.786542	0	0	0	0
2000	903	0.009557	0.01799	-44.3566	0.001941	0.008543	Fe''1.10Mg0.04Fe'''1.59Al0.12Cr0.00Ti0.14O4	0	5.05344	2.74595	56.4082	0	35.0141	0	0.778356	0	0	0	0
2000	902	0.009503	0.017877	-44.0619	0.001929	0.008493	Fe''1.10Mg0.04Fe'''1.60Al0.12Cr0.00Ti0.14O4	0	4.97097	2.74173	56.568	0	34.9491	0	0.770254	0	0	0	0
2000	901	0.009451	0.017766	-43.7719	0.001918	0.008445	Fe''1.10Mg0.04Fe'''1.60Al0.12Cr0.00Ti0.14O4	0	4.8889	2.73749	56.727	0	34.8844	0	0.762234	0	0	0	0
2000	900	0.009399	0.017656	-43.4864	0.001907	0.008397	Fe''1.09Mg0.04Fe'''1.61Al0.12Cr0.00Ti0.14O4	0	4.80725	2.73323	56.8853	0	34.8199	0	0.754296	0	0	0	0
feldspar_0	thermodynamic	data	and	composition:
Pressure	Temperature	mass	S	H	V	Cp	formula	SiO2	TiO2	Al2O3	Fe2O3	Cr2O3	FeO	MnO	MgO	CaO	Na2O	K2O	H2O	An
2000	1187	0.440889	1.0781	-6058.34	0.165529	0.543156	K0.00Na0.28Ca0.72Al1.72Si2.28O8	49.9583	0	32.0897	0	0	0	0	0	14.8172	3.12167	0.0130707	0	72
2000	1186	0.777403	1.90051	-10683.2	0.291894	0.957658	K0.00Na0.28Ca0.72Al1.72Si2.28O8	49.9914	0	32.0674	0	0	0	0	0	14.7911	3.13686	0.0132654	0
2000	1185	0.759131	1.85538	-10432.8	0.285054	0.93508	K0.00Na0.28Ca0.72Al1.72Si2.28O8	50.0243	0	32.0452	0	0	0	0	0	14.7651	3.15196	0.013461	0
2000	1184	0.741494	1.81182	-10191.1	0.278452	0.913289	K0.00Na0.28Ca0.72Al1.72Si2.28O8	50.057	0	32.0231	0	0	0	0	0	14.7392	3.16699	0.0136573	0
2000	1183	0.724463	1.76977	-9957.68	0.272076	0.892246	K0.00Na0.28Ca0.72Al1.72Si2.28O8	50.0896	0	32.0011	0	0	0	0	0	14.7135	3.18195	0.0138544	0
2000	1182	0.708011	1.72915	-9732.21	0.265917	0.87192	K0.00Na0.28Ca0.72Al1.72Si2.28O8	50.122	0	31.9792	0	0	0	0	0	14.6879	3.19683	0.0140524	0
2000	1181	0.692112	1.68989	-9514.31	0.259964	0.852277	K0.00Na0.28Ca0.72Al1.72Si2.28O8	50.1543	0	31.9574	0	0	0	0	0	14.6624	3.21164	0.0142511	0
2000	1180	0.676742	1.65195	-9303.65	0.254209	0.833288	K0.00Na0.28Ca0.71Al1.71Si2.29O8	50.1864	0	31.9358	0	0	0	0	0	14.637	3.22638	0.0144506	0
2000	1179	0.661876	1.61526	-9099.9	0.248643	0.814923	K0.00Na0.29Ca0.71Al1.71Si2.29O8	50.2184	0	31.9142	0	0	0	0	0	14.6117	3.24105	0.0146509	0
2000	1178	0.647494	1.57976	-8902.76	0.243257	0.797156	K0.00Na0.29Ca0.71Al1.71Si2.29O8	50.2502	0	31.8927	0	0	0	0	0	14.5866	3.25565	0.0148521	0
2000	1177	0.633574	1.5454	-8711.96	0.238044	0.77996	K0.00Na0.29Ca0.71Al1.71Si2.29O8	50.2819	0	31.8713	0	0	0	0	0	14.5616	3.27019	0.015054	0
2000	1176	0.620096	1.51215	-8527.23	0.232997	0.763312	K0.00Na0.29Ca0.71Al1.71Si2.29O8	50.3134	0	31.85	0	0	0	0	0	14.5366	3.28466	0.0152567	0
2000	1175	0.520669	1.26944	-7160.35	0.195664	0.640882	K0.00Na0.29Ca0.71Al1.71Si2.29O8	50.366	0	31.8145	0	0	0	0	0	14.4951	3.30886	0.0154806	0
2000	1174	0.542395	1.32212	-7459.57	0.20385	0.66758	K0.00Na0.29Ca0.71Al1.71Si2.29O8	50.4103	0	31.7847	0	0	0	0	0	14.4601	3.3292	0.0156977	0
2000	1173	0.530488	1.29282	-7296.25	0.199397	0.652881	K0.00Na0.30Ca0.70Al1.70Si2.30O8	50.4545	0	31.7549	0	0	0	0	0	14.4252	3.34952	0.0159159	0
2000	1172	0.518999	1.26454	-7138.66	0.195099	0.638698	K0.00Na0.30Ca0.70Al1.70Si2.30O8	50.4986	0	31.7251	0	0	0	0	0	14.3903	3.36982	0.0161352	0
2000	1171	0.507908	1.23725	-6986.53	0.19095	0.625008	K0.00Na0.30Ca0.70Al1.70Si2.30O8	50.5428	0	31.6953	0	0	0	0	0	14.3555	3.3901	0.0163556	0
2000	1170	0.497197	1.21089	-6839.6	0.186943	0.611786	K0.00Na0.30Ca0.70Al1.70Si2.30O8	50.5869	0	31.6655	0	0	0	0	0	14.3207	3.41037	0.0165772	0
2000	1169	0.486848	1.18542	-6697.64	0.183072	0.599012	K0.00Na0.30Ca0.70Al1.70Si2.30O8	50.6309	0	31.6358	0	0	0	0	0	14.2858	3.43062	0.0168	0
2000	1168	0.476846	1.16081	-6560.44	0.17933	0.586666	K0.00Na0.30Ca0.69Al1.69Si2.31O8	50.6749	0	31.6061	0	0	0	0	0	14.2511	3.45085	0.017024	0
2000	1167	0.467175	1.13702	-6427.76	0.175711	0.574729	K0.00Na0.31Ca0.69Al1.69Si2.31O8	50.7189	0	31.5764	0	0	0	0	0	14.2163	3.47107	0.0172491	0
2000	1166	0.45782	1.114	-6299.43	0.172211	0.563183	K0.00Na0.31Ca0.69Al1.69Si2.31O8	50.7629	0	31.5468	0	0	0	0	0	14.1816	3.49127	0.0174755	0
2000	1165	0.448767	1.09173	-6175.25	0.168824	0.55201	K0.00Na0.31Ca0.69Al1.69Si2.31O8	50.8068	0	31.5171	0	0	0	0	0	14.1469	3.51146	0.017703	0
2000	1164	0.446022	1.08481	-6137.84	0.167809	0.548596	K0.00Na0.31Ca0.69Al1.69Si2.31O8	50.8509	0	31.4874	0	0	0	0	0	14.112	3.53173	0.0179335	0
2000	1163	0.441817	1.07435	-6080.33	0.166245	0.543387	K0.00Na0.31Ca0.69Al1.69Si2.31O8	50.8947	0	31.4579	0	0	0	0	0	14.0775	3.55183	0.0181658	0
2000	1162	0.433119	1.05296	-5960.99	0.162989	0.532659	K0.00Na0.31Ca0.68Al1.68Si2.32O8	50.9384	0	31.4284	0	0	0	0	0	14.0429	3.57191	0.0183993	0
2000	1161	0.424697	1.03225	-5845.44	0.159837	0.522267	K0.00Na0.32Ca0.68Al1.68Si2.32O8	50.9821	0	31.3989	0	0	0	0	0	14.0084	3.59198	0.018634	0
2000	1160	0.41654	1.0122	-5733.51	0.156783	0.512201	K0.00Na0.32Ca0.68Al1.68Si2.32O8	51.0257	0	31.3694	0	0	0	0	0	13.974	3.61203	0.01887	0
2000	1159	0.408637	0.992767	-5625.06	0.153824	0.502448	K0.00Na0.32Ca0.68Al1.68Si2.32O8	51.0693	0	31.34	0	0	0	0	0	13.9395	3.63207	0.0191073	0
2000	1158	0.400976	0.973935	-5519.94	0.150956	0.492995	K0.00Na0.32Ca0.68Al1.68Si2.32O8	51.1129	0	31.3106	0	0	0	0	0	13.9051	3.65209	0.0193458	0
2000	1157	0.393548	0.955676	-5418.01	0.148176	0.48383	K0.00Na0.32Ca0.68Al1.68Si2.32O8	51.1565	0	31.2812	0	0	0	0	0	13.8706	3.6721	0.0195856	0
2000	1156	0.386344	0.937968	-5319.15	0.145478	0.474941	K0.00Na0.33Ca0.67Al1.67Si2.33O8	51.2	0	31.2518	0	0	0	0	0	13.8363	3.69209	0.0198268	0
2000	1155	0.379354	0.920788	-5223.23	0.142861	0.466316	K0.00Na0.33Ca0.67Al1.67Si2.33O8	51.2435	0	31.2225	0	0	0	0	0	13.8019	3.71208	0.0200692	0
2000	1154	0.37257	0.904115	-5130.14	0.140321	0.457946	K0.00Na0.33Ca0.67Al1.67Si2.33O8	51.287	0	31.1931	0	0	0	0	0	13.7675	3.73204	0.0203129	0
2000	1153	0.365984	0.887929	-5039.76	0.137855	0.449821	K0.00Na0.33Ca0.67Al1.67Si2.33O8	51.3304	0	31.1638	0	0	0	0	0	13.7332	3.752	0.020558	0
2000	1152	0.359588	0.872212	-4951.99	0.13546	0.44193	K0.00Na0.33Ca0.67Al1.67Si2.33O8	51.3738	0	31.1345	0	0	0	0	0	13.6989	3.77194	0.0208044	0
2000	1151	0.353376	0.856944	-4866.72	0.133133	0.434264	K0.00Na0.33Ca0.66Al1.66Si2.34O8	51.4172	0	31.1052	0	0	0	0	0	13.6646	3.79186	0.0210522	0
2000	1150	0.347338	0.84211	-4783.87	0.130872	0.426816	K0.00Na0.34Ca0.66Al1.66Si2.34O8	51.4606	0	31.076	0	0	0	0	0	13.6304	3.81178	0.0213014	0
2000	1149	0.34147	0.827691	-4703.33	0.128675	0.419577	K0.00Na0.34Ca0.66Al1.66Si2.34O8	51.5039	0	31.0467	0	0	0	0	0	13.5961	3.83168	0.0215519	0
2000	1148	0.335765	0.813674	-4625.03	0.126538	0.412538	K0.00Na0.34Ca0.66Al1.66Si2.34O8	51.5472	0	31.0175	0	0	0	0	0	13.5619	3.85156	0.0218039	0
2000	1147	0.330217	0.800042	-4548.88	0.12446	0.405693	K0.00Na0.34Ca0.66Al1.66Si2.34O8	51.5905	0	30.9883	0	0	0	0	0	13.5277	3.87144	0.0220572	0
2000	1146	0.324819	0.786781	-4474.79	0.122438	0.399035	K0.00Na0.34Ca0.66Al1.66Si2.34O8	51.6338	0	30.9591	0	0	0	0	0	13.4935	3.89129	0.022312	0
2000	1145	0.319567	0.773878	-4402.71	0.120471	0.392556	K0.00Na0.34Ca0.65Al1.65Si2.35O8	51.677	0	30.9299	0	0	0	0	0	13.4594	3.91114	0.0225681	0
2000	1144	0.314455	0.76132	-4332.54	0.118556	0.386249	K0.00Na0.35Ca0.65Al1.65Si2.35O8	51.7202	0	30.9008	0	0	0	0	0	13.4252	3.93097	0.0228258	0
2000	1143	0.309478	0.749095	-4264.23	0.116691	0.38011	K0.00Na0.35Ca0.65Al1.65Si2.35O8	51.7634	0	30.8716	0	0	0	0	0	13.3911	3.95079	0.0230848	0
2000	1142	0.304631	0.73719	-4197.7	0.114876	0.374131	K0.00Na0.35Ca0.65Al1.65Si2.35O8	51.8065	0	30.8425	0	0	0	0	0	13.357	3.9706	0.0233454	0
2000	1141	0.29991	0.725594	-4132.9	0.113107	0.368308	K0.00Na0.35Ca0.65Al1.65Si2.35O8	51.8496	0	30.8134	0	0	0	0	0	13.323	3.99039	0.0236074	0
2000	1140	0.29531	0.714297	-4069.76	0.111384	0.362634	K0.00Na0.35Ca0.65Al1.65Si2.35O8	51.8927	0	30.7843	0	0	0	0	0	13.2889	4.01017	0.0238709	0
2000	1139	0.290828	0.703287	-4008.22	0.109704	0.357105	K0.00Na0.35Ca0.64Al1.64Si2.36O8	51.9358	0	30.7553	0	0	0	0	0	13.2549	4.02993	0.0241359	0
2000	1138	0.286458	0.692556	-3948.24	0.108067	0.351715	K0.00Na0.36Ca0.64Al1.64Si2.36O8	51.9788	0	30.7262	0	0	0	0	0	13.2209	4.04968	0.0244024	0
2000	1137	0.282198	0.682093	-3889.75	0.10647	0.34646	K0.00Na0.36Ca0.64Al1.64Si2.36O8	52.0218	0	30.6972	0	0	0	0	0	13.1869	4.06941	0.0246704	0
2000	1136	0.278042	0.67189	-3832.71	0.104913	0.341335	K0.00Na0.36Ca0.64Al1.64Si2.36O8	52.0648	0	30.6682	0	0	0	0	0	13.153	4.08913	0.0249399	0
2000	1135	0.273989	0.661937	-3777.07	0.103395	0.336336	K0.00Na0.36Ca0.64Al1.64Si2.36O8	52.1077	0	30.6392	0	0	0	0	0	13.119	4.10883	0.025211	0
2000	1134	0.270035	0.652227	-3722.78	0.101913	0.331458	K0.00Na0.36Ca0.64Al1.64Si2.36O8	52.1506	0	30.6102	0	0	0	0	0	13.0851	4.12852	0.0254836	0
2000	1133	0.266176	0.642751	-3669.8	0.100466	0.326698	K0.00Na0.36Ca0.63Al1.63Si2.37O8	52.1935	0	30.5813	0	0	0	0	0	13.0512	4.1482	0.0257578	0
2000	1132	0.262408	0.633502	-3618.08	0.099054	0.322052	K0.00Na0.37Ca0.63Al1.63Si2.37O8	52.2363	0	30.5524	0	0	0	0	0	13.0174	4.16785	0.0260335	0
2000	1131	0.25873	0.624472	-3567.59	0.097676	0.317516	K0.00Na0.37Ca0.63Al1.63Si2.37O8	52.2792	0	30.5235	0	0	0	0	0	12.9836	4.1875	0.0263109	0
2000	1130	0.255139	0.615654	-3518.28	0.09633	0.313087	K0.00Na0.37Ca0.63Al1.63Si2.37O8	52.3219	0	30.4946	0	0	0	0	0	12.9497	4.20712	0.0265898	0
2000	1129	0.251631	0.607042	-3470.11	0.095015	0.30876	K0.00Na0.37Ca0.63Al1.63Si2.37O8	52.3647	0	30.4657	0	0	0	0	0	12.916	4.22673	0.0268703	0
2000	1128	0.248203	0.598628	-3423.06	0.09373	0.304533	K0.00Na0.37Ca0.63Al1.63Si2.37O8	52.4074	0	30.4369	0	0	0	0	0	12.8822	4.24633	0.0271524	0
2000	1127	0.244854	0.590408	-3377.08	0.092475	0.300403	K0.00Na0.37Ca0.62Al1.62Si2.38O8	52.4501	0	30.4081	0	0	0	0	0	12.8485	4.2659	0.0274362	0
2000	1126	0.241581	0.582373	-3332.14	0.091248	0.296367	K0.00Na0.38Ca0.62Al1.62Si2.38O8	52.4927	0	30.3793	0	0	0	0	0	12.8148	4.28546	0.0277215	0
2000	1125	0.238382	0.57452	-3288.2	0.090048	0.292421	K0.00Na0.38Ca0.62Al1.62Si2.38O8	52.5353	0	30.3505	0	0	0	0	0	12.7811	4.30501	0.0280086	0
2000	1124	0.235253	0.566841	-3245.25	0.088875	0.288563	K0.00Na0.38Ca0.62Al1.62Si2.38O8	52.5779	0	30.3218	0	0	0	0	0	12.7475	4.32453	0.0282972	0
2000	1123	0.232194	0.559333	-3203.25	0.087729	0.284791	K0.00Na0.38Ca0.62Al1.62Si2.38O8	52.6205	0	30.2931	0	0	0	0	0	12.7138	4.34404	0.0285875	0
2000	1122	0.229202	0.551989	-3162.16	0.086607	0.281101	K0.00Na0.38Ca0.62Al1.62Si2.38O8	52.663	0	30.2644	0	0	0	0	0	12.6802	4.36353	0.0288795	0
2000	1121	0.226275	0.544805	-3121.96	0.085509	0.277491	K0.00Na0.38Ca0.61Al1.61Si2.39O8	52.7054	0	30.2357	0	0	0	0	0	12.6467	4.383	0.0291732	0
2000	1120	0.22341	0.537775	-3082.63	0.084435	0.27396	K0.00Na0.39Ca0.61Al1.61Si2.39O8	52.7479	0	30.2071	0	0	0	0	0	12.6132	4.40245	0.0294686	0
2000	1119	0.220607	0.530896	-3044.14	0.083384	0.270503	K0.00Na0.39Ca0.61Al1.61Si2.39O8	52.7902	0	30.1785	0	0	0	0	0	12.5797	4.42189	0.0297656	0
2000	1118	0.217864	0.524163	-3006.47	0.082355	0.26712	K0.00Na0.39Ca0.61Al1.61Si2.39O8	52.8326	0	30.1499	0	0	0	0	0	12.5462	4.4413	0.0300644	0
2000	1117	0.215178	0.517572	-2969.58	0.081348	0.263808	K0.00Na0.39Ca0.61Al1.61Si2.39O8	52.8749	0	30.1213	0	0	0	0	0	12.5127	4.46069	0.0303649	0
2000	1116	0.212547	0.511118	-2933.46	0.080361	0.260565	K0.00Na0.39Ca0.61Al1.61Si2.39O8	52.9172	0	30.0928	0	0	0	0	0	12.4793	4.48007	0.0306671	0
2000	1115	0.209972	0.504798	-2898.09	0.079395	0.257389	K0.00Na0.39Ca0.60Al1.60Si2.40O8	52.9594	0	30.0642	0	0	0	0	0	12.446	4.49943	0.030971	0
2000	1114	0.207449	0.498607	-2863.44	0.078449	0.254278	K0.00Na0.40Ca0.60Al1.60Si2.40O8	53.0016	0	30.0358	0	0	0	0	0	12.4126	4.51876	0.0312767	0
2000	1113	0.204977	0.492543	-2829.5	0.077522	0.251231	K0.00Na0.40Ca0.60Al1.60Si2.40O8	53.0437	0	30.0073	0	0	0	0	0	12.3793	4.53807	0.0315842	0
2000	1112	0.202555	0.4866	-2796.24	0.076614	0.248244	K0.00Na0.40Ca0.60Al1.60Si2.40O8	53.0858	0	29.9789	0	0	0	0	0	12.346	4.55737	0.0318934	0
2000	1111	0.200182	0.480777	-2763.64	0.075723	0.245318	K0.00Na0.40Ca0.60Al1.60Si2.40O8	53.1279	0	29.9505	0	0	0	0	0	12.3128	4.57664	0.0322044	0
2000	1110	0.197855	0.47507	-2731.69	0.074851	0.24245	K0.00Na0.40Ca0.60Al1.60Si2.40O8	53.1699	0	29.9221	0	0	0	0	0	12.2796	4.59589	0.0325172	0
2000	1109	0.195575	0.469475	-2700.37	0.073995	0.239638	K0.00Na0.40Ca0.59Al1.59Si2.41O8	53.2119	0	29.8938	0	0	0	0	0	12.2464	4.61512	0.0328318	0
2000	1108	0.193339	0.46399	-2669.67	0.073156	0.236882	K0.00Na0.41Ca0.59Al1.59Si2.41O8	53.2538	0	29.8655	0	0	0	0	0	12.2133	4.63433	0.0331481	0
2000	1107	0.191146	0.458611	-2639.55	0.072334	0.234178	K0.00Na0.41Ca0.59Al1.59Si2.41O8	53.2957	0	29.8372	0	0	0	0	0	12.1802	4.65351	0.0334663	0
2000	1106	0.188996	0.453336	-2610.02	0.071527	0.231527	K0.00Na0.41Ca0.59Al1.59Si2.41O8	53.3375	0	29.8089	0	0	0	0	0	12.1471	4.67267	0.0337863	0
2000	1105	0.186886	0.448161	-2581.04	0.070735	0.228926	K0.00Na0.41Ca0.59Al1.59Si2.41O8	53.3793	0	29.7807	0	0	0	0	0	12.1141	4.69181	0.0341082	0
2000	1104	0.184817	0.443085	-2552.62	0.069959	0.226375	K0.00Na0.41Ca0.59Al1.59Si2.41O8	53.421	0	29.7525	0	0	0	0	0	12.0811	4.71093	0.0344319	0
2000	1103	0.182786	0.438104	-2524.73	0.069197	0.223872	K0.00Na0.41Ca0.58Al1.58Si2.42O8	53.4627	0	29.7244	0	0	0	0	0	12.0481	4.73002	0.0347574	0
2000	1102	0.180793	0.433216	-2497.35	0.068449	0.221415	K0.00Na0.42Ca0.58Al1.58Si2.42O8	53.5043	0	29.6963	0	0	0	0	0	12.0152	4.74909	0.0350848	0
2000	1101	0.178837	0.428418	-2470.49	0.067715	0.219004	K0.00Na0.42Ca0.58Al1.58Si2.42O8	53.5459	0	29.6682	0	0	0	0	0	11.9823	4.76814	0.035414	0
2000	1100	0.176917	0.423709	-2444.12	0.066994	0.216637	K0.00Na0.42Ca0.58Al1.58Si2.42O8	53.5875	0	29.6401	0	0	0	0	0	11.9495	4.78716	0.0357452	0
2000	1099	0.175032	0.419085	-2418.22	0.066287	0.214313	K0.00Na0.42Ca0.58Al1.58Si2.42O8	53.629	0	29.6121	0	0	0	0	0	11.9167	4.80616	0.0360782	0
2000	1098	0.173181	0.414546	-2392.8	0.065592	0.212031	K0.00Na0.42Ca0.58Al1.58Si2.42O8	53.6704	0	29.5841	0	0	0	0	0	11.8839	4.82513	0.0364131	0
2000	1097	0.171364	0.410087	-2367.83	0.06491	0.20979	K0.00Na0.42Ca0.57Al1.57Si2.43O8	53.7118	0	29.5562	0	0	0	0	0	11.8512	4.84408	0.0367499	0
2000	1096	0.169578	0.405709	-2343.3	0.06424	0.207589	K0.00Na0.43Ca0.57Al1.57Si2.43O8	53.7531	0	29.5282	0	0	0	0	0	11.8186	4.863	0.0370887	0
2000	1095	0.167824	0.401408	-2319.21	0.063581	0.205427	K0.00Na0.43Ca0.57Al1.57Si2.43O8	53.7944	0	29.5004	0	0	0	0	0	11.7859	4.88189	0.0374293	0
2000	1094	0.166101	0.397182	-2295.54	0.062935	0.203303	K0.00Na0.43Ca0.57Al1.57Si2.43O8	53.8356	0	29.4725	0	0	0	0	0	11.7533	4.90076	0.0377719	0
2000	1093	0.164408	0.39303	-2272.28	0.062299	0.201216	K0.00Na0.43Ca0.57Al1.57Si2.43O8	53.8768	0	29.4447	0	0	0	0	0	11.7208	4.91961	0.0381165	0
2000	1092	0.162744	0.38895	-2249.42	0.061674	0.199165	K0.00Na0.43Ca0.57Al1.57Si2.43O8	53.9179	0	29.4169	0	0	0	0	0	11.6883	4.93843	0.0384629	0
2000	1091	0.161109	0.38494	-2226.96	0.06106	0.19715	K0.00Na0.43Ca0.56Al1.56Si2.44O8	53.959	0	29.3892	0	0	0	0	0	11.6558	4.95722	0.0388114	0
2000	1090	0.159502	0.380998	-2204.88	0.060457	0.195168	K0.00Na0.44Ca0.56Al1.56Si2.44O8	54	0	29.3615	0	0	0	0	0	11.6234	4.97598	0.0391618	0
2000	1089	0.157921	0.377124	-2183.17	0.059863	0.19322	K0.00Na0.44Ca0.56Al1.56Si2.44O8	54.041	0	29.3338	0	0	0	0	0	11.591	4.99472	0.0395142	0
2000	1088	0.156368	0.373314	-2161.82	0.05928	0.191305	K0.00Na0.44Ca0.56Al1.56Si2.44O8	54.0819	0	29.3062	0	0	0	0	0	11.5586	5.01343	0.0398686	0
2000	1087	0.15484	0.369568	-2140.83	0.058706	0.189422	K0.00Na0.44Ca0.56Al1.56Si2.44O8	54.1227	0	29.2786	0	0	0	0	0	11.5264	5.03212	0.0402249	0
2000	1086	0.153337	0.365883	-2120.19	0.058142	0.18757	K0.00Na0.44Ca0.56Al1.56Si2.44O8	54.1635	0	29.2511	0	0	0	0	0	11.4941	5.05077	0.0405833	0
2000	1085	0.151859	0.36226	-2099.88	0.057587	0.185748	K0.00Na0.44Ca0.55Al1.55Si2.45O8	54.2042	0	29.2235	0	0	0	0	0	11.4619	5.0694	0.0409437	0
2000	1084	0.150406	0.358695	-2079.91	0.057041	0.183957	K0.00Na0.45Ca0.55Al1.55Si2.45O8	54.2449	0	29.1961	0	0	0	0	0	11.4298	5.088	0.0413061	0
2000	1083	0.148975	0.355189	-2060.26	0.056504	0.182194	K0.00Na0.45Ca0.55Al1.55Si2.45O8	54.2855	0	29.1686	0	0	0	0	0	11.3976	5.10657	0.0416706	0
2000	1082	0.147568	0.351738	-2040.92	0.055975	0.180459	K0.00Na0.45Ca0.55Al1.55Si2.45O8	54.326	0	29.1412	0	0	0	0	0	11.3656	5.12512	0.042037	0
2000	1081	0.146183	0.348343	-2021.89	0.055455	0.178752	K0.00Na0.45Ca0.55Al1.55Si2.45O8	54.3665	0	29.1139	0	0	0	0	0	11.3336	5.14363	0.0424056	0
2000	1080	0.14482	0.345002	-2003.17	0.054943	0.177073	K0.00Na0.45Ca0.55Al1.55Si2.45O8	54.407	0	29.0866	0	0	0	0	0	11.3016	5.16212	0.0427762	0
2000	1079	0.143479	0.341714	-1984.74	0.054439	0.175419	K0.00Na0.45Ca0.54Al1.54Si2.46O8	54.4473	0	29.0593	0	0	0	0	0	11.2697	5.18057	0.0431488	0
2000	1078	0.142158	0.338476	-1966.59	0.053943	0.173792	K0.00Na0.45Ca0.54Al1.54Si2.46O8	54.4876	0	29.032	0	0	0	0	0	11.2378	5.199	0.0435236	0
2000	1077	0.140858	0.335289	-1948.73	0.053454	0.17219	K0.00Na0.46Ca0.54Al1.54Si2.46O8	54.5279	0	29.0048	0	0	0	0	0	11.206	5.2174	0.0439004	0
2000	1076	0.139578	0.332152	-1931.14	0.052974	0.170612	K0.00Na0.46Ca0.54Al1.54Si2.46O8	54.5681	0	28.9777	0	0	0	0	0	11.1742	5.23577	0.0442793	0
2000	1075	0.138318	0.329062	-1913.82	0.0525	0.169059	K0.00Na0.46Ca0.54Al1.54Si2.46O8	54.6082	0	28.9506	0	0	0	0	0	11.1424	5.2541	0.0446604	0
2000	1074	0.137077	0.32602	-1896.76	0.052034	0.167529	K0.00Na0.46Ca0.54Al1.54Si2.46O8	54.6483	0	28.9235	0	0	0	0	0	11.1108	5.27241	0.0450435	0
2000	1073	0.135854	0.323023	-1879.96	0.051574	0.166022	K0.00Na0.46Ca0.54Al1.54Si2.46O8	54.6883	0	28.8965	0	0	0	0	0	11.0791	5.29069	0.0454288	0
2000	1072	0.13465	0.320071	-1863.42	0.051122	0.164538	K0.00Na0.46Ca0.53Al1.53Si2.47O8	54.7282	0	28.8695	0	0	0	0	0	11.0475	5.30894	0.0458162	0
2000	1071	0.133464	0.317163	-1847.11	0.050676	0.163076	K0.00Na0.47Ca0.53Al1.53Si2.47O8	54.7681	0	28.8425	0	0	0	0	0	11.016	5.32716	0.0462058	0
2000	1070	0.132295	0.314299	-1831.05	0.050236	0.161636	K0.00Na0.47Ca0.53Al1.53Si2.47O8	54.8079	0	28.8156	0	0	0	0	0	10.9845	5.34534	0.0465975	0
2000	1069	0.131143	0.311476	-1815.23	0.049804	0.160217	K0.00Na0.47Ca0.53Al1.53Si2.47O8	54.8477	0	28.7888	0	0	0	0	0	10.9531	5.3635	0.0469913	0
2000	1068	0.130008	0.308695	-1799.63	0.049377	0.158818	K0.00Na0.47Ca0.53Al1.53Si2.47O8	54.8873	0	28.762	0	0	0	0	0	10.9217	5.38162	0.0473874	0
2000	1067	0.12889	0.305954	-1784.26	0.048957	0.15744	K0.00Na0.47Ca0.53Al1.53Si2.47O8	54.927	0	28.7352	0	0	0	0	0	10.8904	5.39972	0.0477856	0
2000	1066	0.127788	0.303252	-1769.11	0.048542	0.156081	K0.00Na0.47Ca0.52Al1.52Si2.48O8	54.9665	0	28.7084	0	0	0	0	0	10.8591	5.41778	0.048186	0
2000	1065	0.126701	0.300589	-1754.18	0.048134	0.154743	K0.00Na0.47Ca0.52Al1.52Si2.48O8	55.006	0	28.6817	0	0	0	0	0	10.8278	5.43581	0.0485886	0
2000	1064	0.12563	0.297964	-1739.46	0.047731	0.153423	K0.00Na0.48Ca0.52Al1.52Si2.48O8	55.0454	0	28.6551	0	0	0	0	0	10.7967	5.45381	0.0489934	0
2000	1063	0.124574	0.295376	-1724.94	0.047334	0.152121	K0.00Na0.48Ca0.52Al1.52Si2.48O8	55.0848	0	28.6285	0	0	0	0	0	10.7655	5.47178	0.0494004	0
2000	1062	0.123532	0.292824	-1710.63	0.046942	0.150838	K0.00Na0.48Ca0.52Al1.52Si2.48O8	55.1241	0	28.6019	0	0	0	0	0	10.7344	5.48972	0.0498097	0
2000	1061	0.122506	0.290308	-1696.52	0.046556	0.149573	K0.00Na0.48Ca0.52Al1.52Si2.48O8	55.1633	0	28.5754	0	0	0	0	0	10.7034	5.50762	0.0502212	0
2000	1060	0.121493	0.287827	-1682.6	0.046175	0.148325	K0.00Na0.48Ca0.51Al1.51Si2.49O8	55.2025	0	28.549	0	0	0	0	0	10.6724	5.52549	0.0506349	0
2000	1059	0.120494	0.285379	-1668.87	0.0458	0.147094	K0.00Na0.48Ca0.51Al1.51Si2.49O8	55.2416	0	28.5225	0	0	0	0	0	10.6415	5.54334	0.0510509	0
2000	1058	0.119509	0.282966	-1655.33	0.045429	0.14588	K0.00Na0.49Ca0.51Al1.51Si2.49O8	55.2806	0	28.4961	0	0	0	0	0	10.6106	5.56114	0.0514692	0
2000	1057	0.118537	0.280584	-1641.98	0.045064	0.144683	K0.00Na0.49Ca0.51Al1.51Si2.49O8	55.3196	0	28.4698	0	0	0	0	0	10.5798	5.57892	0.0518897	0
2000	1056	0.117594	0.278271	-1629	0.044709	0.14352	K0.00Na0.49Ca0.51Al1.51Si2.49O8	55.3585	0	28.4435	0	0	0	0	0	10.549	5.59667	0.0523124	0
2000	1055	0.116691	0.276056	-1616.61	0.04437	0.142407	K0.00Na0.49Ca0.51Al1.51Si2.49O8	55.3973	0	28.4172	0	0	0	0	0	10.5183	5.6144	0.0527369	0
2000	1054	0.115761	0.273777	-1603.82	0.04402	0.141261	K0.00Na0.49Ca0.51Al1.51Si2.49O8	55.4361	0	28.391	0	0	0	0	0	10.4876	5.63209	0.0531638	0
2000	1053	0.114841	0.271524	-1591.18	0.043674	0.140128	K0.00Na0.49Ca0.50Al1.50Si2.50O8	55.4749	0	28.3648	0	0	0	0	0	10.457	5.64976	0.0535929	0
2000	1052	0.113932	0.269296	-1578.68	0.043332	0.139008	K0.00Na0.49Ca0.50Al1.50Si2.50O8	55.5135	0	28.3387	0	0	0	0	0	10.4264	5.66739	0.0540244	0
2000	1051	0.113035	0.267098	-1566.35	0.042994	0.137903	K0.00Na0.50Ca0.50Al1.50Si2.50O8	55.5521	0	28.3126	0	0	0	0	0	10.3958	5.68499	0.0544582	0
2000	1050	0.11215	0.264929	-1554.18	0.042661	0.136812	K0.00Na0.50Ca0.50Al1.50Si2.50O8	55.5907	0	28.2865	0	0	0	0	0	10.3654	5.70256	0.0548943	0
2000	1049	0.111276	0.262788	-1542.16	0.042332	0.135735	K0.00Na0.50Ca0.50Al1.50Si2.50O8	55.6291	0	28.2605	0	0	0	0	0	10.3349	5.72009	0.0553327	0
2000	1048	0.110413	0.260676	-1530.31	0.042008	0.134672	K0.00Na0.50Ca0.50Al1.50Si2.50O8	55.6675	0	28.2346	0	0	0	0	0	10.3045	5.7376	0.0557735	0
2000	1047	0.109562	0.25859	-1518.6	0.041687	0.133623	K0.00Na0.50Ca0.50Al1.50Si2.50O8	55.7059	0	28.2086	0	0	0	0	0	10.2742	5.75507	0.0562166	0
2000	1046	0.108721	0.256531	-1507.05	0.041371	0.132588	K0.00Na0.50Ca0.49Al1.49Si2.51O8	55.7441	0	28.1828	0	0	0	0	0	10.2439	5.77251	0.0566622	0
2000	1045	0.107892	0.254499	-1495.64	0.041059	0.131566	K0.00Na0.50Ca0.49Al1.49Si2.51O8	55.7823	0	28.1569	0	0	0	0	0	10.2137	5.78991	0.05711	0
2000	1044	0.107072	0.252492	-1484.38	0.04075	0.130556	K0.00Na0.51Ca0.49Al1.49Si2.51O8	55.8205	0	28.1311	0	0	0	0	0	10.1835	5.80729	0.0575603	0
2000	1043	0.106264	0.250511	-1473.26	0.040446	0.12956	K0.00Na0.51Ca0.49Al1.49Si2.51O8	55.8585	0	28.1054	0	0	0	0	0	10.1534	5.82463	0.058013	0
2000	1042	0.105465	0.248555	-1462.28	0.040145	0.128576	K0.00Na0.51Ca0.49Al1.49Si2.51O8	55.8965	0	28.0797	0	0	0	0	0	10.1234	5.84194	0.0584681	0
2000	1041	0.104676	0.246623	-1451.44	0.039848	0.127604	K0.00Na0.51Ca0.49Al1.49Si2.51O8	55.9345	0	28.0541	0	0	0	0	0	10.0933	5.85922	0.0589256	0
2000	1040	0.103898	0.244716	-1440.73	0.039555	0.126645	K0.00Na0.51Ca0.48Al1.48Si2.52O8	55.9723	0	28.0284	0	0	0	0	0	10.0634	5.87647	0.0593855	0
2000	1039	0.103129	0.242832	-1430.16	0.039266	0.125698	K0.00Na0.51Ca0.48Al1.48Si2.52O8	56.0101	0	28.0029	0	0	0	0	0	10.0335	5.89368	0.0598479	0
2000	1038	0.102369	0.240972	-1419.71	0.03898	0.124762	K0.00Na0.51Ca0.48Al1.48Si2.52O8	56.0479	0	27.9774	0	0	0	0	0	10.0036	5.91086	0.0603127	0
2000	1037	0.101619	0.239135	-1409.4	0.038697	0.123838	K0.00Na0.52Ca0.48Al1.48Si2.52O8	56.0855	0	27.9519	0	0	0	0	0	9.9738	5.92801	0.06078	0
2000	1036	0.100878	0.23732	-1399.21	0.038418	0.122925	K0.00Na0.52Ca0.48Al1.48Si2.52O8	56.1231	0	27.9265	0	0	0	0	0	9.94404	5.94513	0.0612497	0
2000	1035	0.100146	0.235528	-1389.15	0.038143	0.122023	K0.00Na0.52Ca0.48Al1.48Si2.52O8	56.1607	0	27.9011	0	0	0	0	0	9.91434	5.96221	0.061722	0
2000	1034	0.099423	0.233757	-1379.21	0.03787	0.121133	K0.00Na0.52Ca0.48Al1.48Si2.52O8	56.1981	0	27.8757	0	0	0	0	0	9.88469	5.97927	0.0621967	0
2000	1033	0.098709	0.232008	-1369.39	0.037601	0.120253	K0.00Na0.52Ca0.47Al1.47Si2.53O8	56.2355	0	27.8504	0	0	0	0	0	9.85508	5.99629	0.0626739	0
2000	1032	0.098003	0.23028	-1359.69	0.037336	0.119384	K0.00Na0.52Ca0.47Al1.47Si2.53O8	56.2729	0	27.8252	0	0	0	0	0	9.82553	6.01328	0.0631537	0
2000	1031	0.097307	0.228574	-1350.1	0.037073	0.118525	K0.00Na0.53Ca0.47Al1.47Si2.53O8	56.3102	0	27.7999	0	0	0	0	0	9.79603	6.03024	0.063636	0
2000	1030	0.096618	0.226887	-1340.63	0.036814	0.117677	K0.00Na0.53Ca0.47Al1.47Si2.53O8	56.3474	0	27.7748	0	0	0	0	0	9.76658	6.04716	0.0641208	0
2000	1029	0.095938	0.225222	-1331.28	0.036558	0.116839	K0.00Na0.53Ca0.47Al1.47Si2.53O8	56.3845	0	27.7496	0	0	0	0	0	9.73719	6.06406	0.0646081	0
2000	1028	0.095266	0.223576	-1322.04	0.036304	0.116011	K0.00Na0.53Ca0.47Al1.47Si2.53O8	56.4216	0	27.7246	0	0	0	0	0	9.70784	6.08092	0.0650981	0
2000	1027	0.094602	0.22195	-1312.91	0.036054	0.115193	K0.00Na0.53Ca0.47Al1.47Si2.53O8	56.4586	0	27.6995	0	0	0	0	0	9.67854	6.09776	0.0655906	0
2000	1026	0.093946	0.220343	-1303.88	0.035807	0.114385	K0.00Na0.53Ca0.46Al1.46Si2.54O8	56.4955	0	27.6745	0	0	0	0	0	9.6493	6.11456	0.0660857	0
2000	1025	0.093297	0.218756	-1294.97	0.035563	0.113586	K0.00Na0.53Ca0.46Al1.46Si2.54O8	56.5324	0	27.6496	0	0	0	0	0	9.6201	6.13133	0.0665834	0
2000	1024	0.092657	0.217187	-1286.16	0.035321	0.112797	K0.00Na0.53Ca0.46Al1.46Si2.54O8	56.5693	0	27.6246	0	0	0	0	0	9.59095	6.14807	0.0670837	0
2000	1023	0.092025	0.21564	-1277.47	0.035083	0.112779	K0.00Na0.54Ca0.46Al1.46Si2.54O8	56.606	0	27.5998	0	0	0	0	0	9.56185	6.16478	0.0675866	0
2000	1022	0.091403	0.214115	-1268.92	0.034849	0.11201	K0.00Na0.54Ca0.46Al1.46Si2.54O8	56.6427	0	27.5749	0	0	0	0	0	9.5328	6.18146	0.0680922	0
2000	1021	0.090788	0.212609	-1260.47	0.034617	0.111251	K0.00Na0.54Ca0.46Al1.46Si2.54O8	56.6794	0	27.5501	0	0	0	0	0	9.50379	6.19811	0.0686005	0
2000	1020	0.090181	0.211121	-1252.12	0.034388	0.1105	K0.00Na0.54Ca0.46Al1.46Si2.54O8	56.7159	0	27.5254	0	0	0	0	0	9.47483	6.21473	0.0691115	0
2000	1019	0.089581	0.209651	-1243.87	0.034162	0.109759	K0.00Na0.54Ca0.45Al1.45Si2.55O8	56.7525	0	27.5007	0	0	0	0	0	9.44592	6.23132	0.0696251	0
2000	1018	0.088989	0.208199	-1235.72	0.033939	0.109026	K0.00Na0.54Ca0.45Al1.45Si2.55O8	56.7889	0	27.476	0	0	0	0	0	9.41705	6.24789	0.0701415	0
2000	1017	0.088403	0.206764	-1227.67	0.033718	0.108302	K0.00Na0.54Ca0.45Al1.45Si2.55O8	56.8253	0	27.4514	0	0	0	0	0	9.38823	6.26442	0.0706606	0
2000	1016	0.087824	0.205346	-1219.71	0.0335	0.107587	K0.00Na0.55Ca0.45Al1.45Si2.55O8	56.8617	0	27.4267	0	0	0	0	0	9.35945	6.28093	0.0711825	0
2000	1015	0.087253	0.203945	-1211.85	0.033285	0.106881	K0.00Na0.55Ca0.45Al1.45Si2.55O8	56.898	0	27.4022	0	0	0	0	0	9.33072	6.29741	0.0717071	0
2000	1014	0.086688	0.202561	-1204.09	0.033072	0.106183	K0.00Na0.55Ca0.45Al1.45Si2.55O8	56.9342	0	27.3777	0	0	0	0	0	9.30203	6.31386	0.0722345	0
2000	1013	0.08613	0.201194	-1196.41	0.032861	0.105493	K0.00Na0.55Ca0.45Al1.45Si2.55O8	56.9704	0	27.3532	0	0	0	0	0	9.27339	6.33028	0.0727647	0
2000	1012	0.085579	0.199843	-1188.84	0.032654	0.104812	K0.00Na0.55Ca0.44Al1.44Si2.56O8	57.0065	0	27.3287	0	0	0	0	0	9.24479	6.34668	0.0732977	0
2000	1011	0.085035	0.198509	-1181.35	0.032448	0.104139	K0.00Na0.55Ca0.44Al1.44Si2.56O8	57.0426	0	27.3043	0	0	0	0	0	9.21623	6.36305	0.0738335	0
2000	1010	0.084497	0.197191	-1173.96	0.032246	0.103475	K0.00Na0.55Ca0.44Al1.44Si2.56O8	57.0786	0	27.2799	0	0	0	0	0	9.18771	6.37939	0.0743722	0
2000	1009	0.083966	0.195889	-1166.66	0.032046	0.102819	K0.00Na0.56Ca0.44Al1.44Si2.56O8	57.1145	0	27.2556	0	0	0	0	0	9.15924	6.39571	0.0749137	0
2000	1008	0.083442	0.194604	-1159.45	0.031848	0.102171	K0.00Na0.56Ca0.44Al1.44Si2.56O8	57.1505	0	27.2313	0	0	0	0	0	9.13081	6.41199	0.0754582	0
2000	1007	0.082924	0.193334	-1152.33	0.031653	0.101531	K0.00Na0.56Ca0.44Al1.44Si2.56O8	57.1863	0	27.207	0	0	0	0	0	9.10242	6.42825	0.0760055	0
2000	1006	0.082413	0.192081	-1145.3	0.03146	0.100899	K0.00Na0.56Ca0.44Al1.44Si2.56O8	57.2221	0	27.1828	0	0	0	0	0	9.07408	6.44449	0.0765557	0
2000	1005	0.081909	0.190844	-1138.37	0.03127	0.100276	K0.00Na0.56Ca0.43Al1.43Si2.57O8	57.2578	0	27.1586	0	0	0	0	0	9.04577	6.4607	0.0771089	0
2000	1004	0.081411	0.189624	-1131.52	0.031082	0.099661	K0.00Na0.56Ca0.43Al1.43Si2.57O8	57.2935	0	27.1344	0	0	0	0	0	9.01751	6.47688	0.077665	0
2000	1003	0.080921	0.18842	-1124.78	0.030897	0.099054	K0.00Na0.56Ca0.43Al1.43Si2.57O8	57.3292	0	27.1103	0	0	0	0	0	8.98928	6.49304	0.0782241	0
2000	1002	0.080437	0.187234	-1118.13	0.030715	0.098457	K0.00Na0.57Ca0.43Al1.43Si2.57O8	57.3648	0	27.0862	0	0	0	0	0	8.96109	6.50917	0.0787861	0
2000	1001	0.079962	0.186066	-1111.59	0.030535	0.097868	K0.00Na0.57Ca0.43Al1.43Si2.57O8	57.4003	0	27.0621	0	0	0	0	0	8.93295	6.52528	0.0793513	0
2000	1000	0.079494	0.184918	-1105.16	0.030359	0.09729	K0.00Na0.57Ca0.43Al1.43Si2.57O8	57.4358	0	27.0381	0	0	0	0	0	8.90483	6.54137	0.0799194	0
2000	999	0.079037	0.183793	-1098.87	0.030187	0.096724	K0.00Na0.57Ca0.43Al1.43Si2.57O8	57.4712	0	27.0141	0	0	0	0	0	8.87676	6.55743	0.0804906	0
2000	998	0.078591	0.182697	-1092.74	0.030018	0.096173	K0.00Na0.57Ca0.42Al1.42Si2.58O8	57.5067	0	26.9901	0	0	0	0	0	8.84871	6.57347	0.0810649	0
2000	997	0.078161	0.181638	-1086.83	0.029856	0.095641	K0.00Na0.57Ca0.42Al1.42Si2.58O8	57.542	0	26.9661	0	0	0	0	0	8.8207	6.58949	0.0816423	0
2000	996	0.077756	0.180639	-1081.28	0.029704	0.095141	K0.00Na0.57Ca0.42Al1.42Si2.58O8	57.5774	0	26.9422	0	0	0	0	0	8.79271	6.60549	0.0822229	0
2000	995	0.077402	0.179758	-1076.43	0.029571	0.094702	K0.00Na0.57Ca0.42Al1.42Si2.58O8	57.6127	0	26.9183	0	0	0	0	0	8.76473	6.62149	0.0828068	0
2000	994	0.077187	0.179198	-1073.5	0.029491	0.094432	K0.00Na0.58Ca0.42Al1.42Si2.58O8	57.6481	0	26.8943	0	0	0	0	0	8.73671	6.63751	0.0833941	0
2000	993	0.0749	0.173831	-1041.76	0.028619	0.091629	K0.00Na0.58Ca0.42Al1.42Si2.58O8	57.6826	0	26.8709	0	0	0	0	0	8.70933	6.65315	0.0839821	0
2000	992	0.082995	0.192557	-1154.43	0.031715	0.101527	K0.00Na0.58Ca0.42Al1.42Si2.58O8	57.7206	0	26.8452	0	0	0	0	0	8.67926	6.67036	0.0845842	0
2000	991	0.082519	0.19139	-1147.88	0.031536	0.100938	K0.00Na0.58Ca0.41Al1.41Si2.59O8	57.7585	0	26.8195	0	0	0	0	0	8.6492	6.68756	0.0851888	0
2000	990	0.081866	0.189814	-1138.87	0.031289	0.100134	K0.00Na0.58Ca0.41Al1.41Si2.59O8	57.7964	0	26.7939	0	0	0	0	0	8.61921	6.70472	0.0857957	0
2000	989	0.081221	0.188258	-1129.97	0.031045	0.09934	K0.00Na0.58Ca0.41Al1.41Si2.59O8	57.8342	0	26.7683	0	0	0	0	0	8.5893	6.72183	0.0864049	0
2000	988	0.080585	0.186721	-1121.18	0.030804	0.098555	K0.00Na0.58Ca0.41Al1.41Si2.59O8	57.8718	0	26.7428	0	0	0	0	0	8.55946	6.7389	0.0870165	0
2000	987	0.079956	0.185203	-1112.51	0.030566	0.097781	K0.01Na0.59Ca0.41Al1.41Si2.59O8	57.9094	0	26.7173	0	0	0	0	0	8.52969	6.75592	0.0876303	0
2000	986	0.079335	0.183704	-1103.93	0.030331	0.097016	K0.01Na0.59Ca0.41Al1.41Si2.59O8	57.9469	0	26.6919	0	0	0	0	0	8.49999	6.7729	0.0882466	0
2000	985	0.078721	0.182224	-1095.47	0.030099	0.09626	K0.01Na0.59Ca0.41Al1.41Si2.59O8	57.9843	0	26.6666	0	0	0	0	0	8.47037	6.78984	0.0888651	0
2000	984	0.078115	0.180762	-1087.1	0.029869	0.095514	K0.01Na0.59Ca0.40Al1.40Si2.60O8	58.0216	0	26.6413	0	0	0	0	0	8.44082	6.80673	0.089486	0
2000	983	0.077517	0.179317	-1078.84	0.029643	0.094776	K0.01Na0.59Ca0.40Al1.40Si2.60O8	58.0589	0	26.6161	0	0	0	0	0	8.41133	6.82358	0.0901093	0
2000	982	0.076925	0.17789	-1070.68	0.029419	0.094047	K0.01Na0.59Ca0.40Al1.40Si2.60O8	58.096	0	26.591	0	0	0	0	0	8.38192	6.84039	0.0907349	0
2000	981	0.076341	0.17648	-1062.61	0.029197	0.093328	K0.01Na0.59Ca0.40Al1.40Si2.60O8	58.133	0	26.5659	0	0	0	0	0	8.35258	6.85715	0.0913629	0
2000	980	0.075763	0.175087	-1054.64	0.028979	0.092616	K0.01Na0.60Ca0.40Al1.40Si2.60O8	58.17	0	26.5409	0	0	0	0	0	8.32331	6.87387	0.0919932	0
2000	979	0.075192	0.17371	-1046.76	0.028763	0.091913	K0.01Na0.60Ca0.40Al1.40Si2.60O8	58.2068	0	26.5159	0	0	0	0	0	8.29411	6.89055	0.092626	0
2000	978	0.074628	0.172349	-1038.97	0.028549	0.091218	K0.01Na0.60Ca0.40Al1.40Si2.60O8	58.2436	0	26.491	0	0	0	0	0	8.26498	6.90719	0.0932611	0
2000	977	0.074071	0.171004	-1031.28	0.028338	0.090532	K0.01Na0.60Ca0.39Al1.39Si2.61O8	58.2803	0	26.4661	0	0	0	0	0	8.23592	6.92378	0.0938985	0
2000	976	0.07352	0.169675	-1023.67	0.028129	0.089853	K0.01Na0.60Ca0.39Al1.39Si2.61O8	58.3169	0	26.4413	0	0	0	0	0	8.20693	6.94033	0.0945384	0
2000	975	0.072975	0.168361	-1016.15	0.027923	0.089182	K0.01Na0.60Ca0.39Al1.39Si2.61O8	58.3534	0	26.4166	0	0	0	0	0	8.17801	6.95684	0.0951807	0
2000	974	0.072437	0.167063	-1008.72	0.027719	0.088519	K0.01Na0.60Ca0.39Al1.39Si2.61O8	58.3898	0	26.3919	0	0	0	0	0	8.14915	6.97331	0.0958253	0
2000	973	0.071904	0.165779	-1001.37	0.027517	0.087863	K0.01Na0.61Ca0.39Al1.39Si2.61O8	58.4261	0	26.3673	0	0	0	0	0	8.12037	6.98973	0.0964724	0
2000	972	0.071378	0.164509	-994.1	0.027318	0.087215	K0.01Na0.61Ca0.39Al1.39Si2.61O8	58.4624	0	26.3428	0	0	0	0	0	8.09165	7.00611	0.0971219	0
2000	971	0.070857	0.163254	-986.914	0.027121	0.086574	K0.01Na0.61Ca0.39Al1.39Si2.61O8	58.4985	0	26.3183	0	0	0	0	0	8.063	7.02246	0.0977738	0
2000	970	0.070342	0.162013	-979.807	0.026926	0.08594	K0.01Na0.61Ca0.38Al1.38Si2.62O8	58.5346	0	26.2938	0	0	0	0	0	8.03441	7.03876	0.0984281	0
2000	969	0.069833	0.160786	-972.778	0.026733	0.085313	K0.01Na0.61Ca0.38Al1.38Si2.62O8	58.5706	0	26.2694	0	0	0	0	0	8.0059	7.05502	0.0990849	0
2000	968	0.06933	0.159572	-965.827	0.026542	0.084693	K0.01Na0.61Ca0.38Al1.38Si2.62O8	58.6065	0	26.2451	0	0	0	0	0	7.97745	7.07124	0.0997441	0
2000	967	0.068832	0.158371	-958.951	0.026354	0.08408	K0.01Na0.61Ca0.38Al1.38Si2.62O8	58.6423	0	26.2208	0	0	0	0	0	7.94906	7.08742	0.100406	0
2000	966	0.068339	0.157184	-952.15	0.026167	0.083473	K0.01Na0.62Ca0.38Al1.38Si2.62O8	58.678	0	26.1966	0	0	0	0	0	7.92075	7.10356	0.10107	0
2000	965	0.067852	0.15601	-945.422	0.025982	0.082873	K0.01Na0.62Ca0.38Al1.38Si2.62O8	58.7137	0	26.1724	0	0	0	0	0	7.89249	7.11965	0.101736	0
2000	964	0.06737	0.154848	-938.766	0.0258	0.082279	K0.01Na0.62Ca0.38Al1.38Si2.62O8	58.7492	0	26.1483	0	0	0	0	0	7.86431	7.13571	0.102405	0
2000	963	0.066893	0.153699	-932.181	0.025619	0.081692	K0.01Na0.62Ca0.37Al1.37Si2.63O8	58.7847	0	26.1243	0	0	0	0	0	7.83618	7.15173	0.103077	0
2000	962	0.066421	0.152562	-925.665	0.02544	0.081111	K0.01Na0.62Ca0.37Al1.37Si2.63O8	58.8201	0	26.1003	0	0	0	0	0	7.80813	7.16771	0.103751	0
2000	961	0.065955	0.151437	-919.218	0.025263	0.080536	K0.01Na0.62Ca0.37Al1.37Si2.63O8	58.8554	0	26.0763	0	0	0	0	0	7.78013	7.18365	0.104427	0
2000	960	0.065493	0.150324	-912.838	0.025088	0.079968	K0.01Na0.62Ca0.37Al1.37Si2.63O8	58.8907	0	26.0525	0	0	0	0	0	7.7522	7.19955	0.105106	0
2000	959	0.065035	0.149223	-906.524	0.024914	0.079405	K0.01Na0.62Ca0.37Al1.37Si2.63O8	58.9258	0	26.0286	0	0	0	0	0	7.72434	7.21541	0.105788	0
2000	958	0.064583	0.148133	-900.275	0.024743	0.078848	K0.01Na0.63Ca0.37Al1.37Si2.63O8	58.9609	0	26.0048	0	0	0	0	0	7.69653	7.23124	0.106472	0
2000	957	0.064135	0.147054	-894.091	0.024573	0.078296	K0.01Na0.63Ca0.37Al1.37Si2.63O8	58.9959	0	25.9811	0	0	0	0	0	7.66879	7.24702	0.107158	0
2000	956	0.063692	0.145987	-887.969	0.024405	0.077751	K0.01Na0.63Ca0.37Al1.37Si2.63O8	59.0308	0	25.9574	0	0	0	0	0	7.64111	7.26277	0.107847	0
2000	955	0.063253	0.14493	-881.91	0.024239	0.07721	K0.01Na0.63Ca0.36Al1.36Si2.64O8	59.0657	0	25.9338	0	0	0	0	0	7.6135	7.27848	0.108539	0
2000	954	0.062819	0.143884	-875.911	0.024074	0.076676	K0.01Na0.63Ca0.36Al1.36Si2.64O8	59.1004	0	25.9102	0	0	0	0	0	7.58594	7.29415	0.109233	0
2000	953	0.062389	0.142849	-869.973	0.023911	0.076147	K0.01Na0.63Ca0.36Al1.36Si2.64O8	59.1351	0	25.8867	0	0	0	0	0	7.55845	7.30978	0.109929	0
2000	952	0.061963	0.141824	-864.094	0.023749	0.075623	K0.01Na0.63Ca0.36Al1.36Si2.64O8	59.1697	0	25.8633	0	0	0	0	0	7.53101	7.32538	0.110629	0
2000	951	0.061542	0.14081	-858.273	0.023589	0.075104	K0.01Na0.63Ca0.36Al1.36Si2.64O8	59.2042	0	25.8399	0	0	0	0	0	7.50364	7.34093	0.11133	0
2000	950	0.061125	0.139805	-852.509	0.023431	0.07459	K0.01Na0.64Ca0.36Al1.36Si2.64O8	59.2387	0	25.8165	0	0	0	0	0	7.47633	7.35645	0.112035	0
2000	949	0.060712	0.138811	-846.802	0.023274	0.074082	K0.01Na0.64Ca0.36Al1.36Si2.64O8	59.2731	0	25.7932	0	0	0	0	0	7.44908	7.37194	0.112742	0
2000	948	0.060302	0.137826	-841.15	0.023119	0.073578	K0.01Na0.64Ca0.35Al1.35Si2.65O8	59.3074	0	25.7699	0	0	0	0	0	7.42188	7.38739	0.113451	0
2000	947	0.059897	0.136851	-835.553	0.022965	0.07308	K0.01Na0.64Ca0.35Al1.35Si2.65O8	59.3416	0	25.7467	0	0	0	0	0	7.39475	7.4028	0.114163	0
2000	946	0.059496	0.135886	-830.009	0.022813	0.072586	K0.01Na0.64Ca0.35Al1.35Si2.65O8	59.3757	0	25.7235	0	0	0	0	0	7.36767	7.41817	0.114878	0
2000	945	0.059099	0.13493	-824.519	0.022662	0.072097	K0.01Na0.64Ca0.35Al1.35Si2.65O8	59.4098	0	25.7004	0	0	0	0	0	7.34065	7.43351	0.115595	0
2000	944	0.058705	0.133983	-819.081	0.022513	0.071612	K0.01Na0.64Ca0.35Al1.35Si2.65O8	59.4438	0	25.6774	0	0	0	0	0	7.31369	7.44882	0.116315	0
2000	943	0.058315	0.133045	-813.694	0.022365	0.071132	K0.01Na0.65Ca0.35Al1.35Si2.65O8	59.4777	0	25.6544	0	0	0	0	0	7.28679	7.46409	0.117038	0
2000	942	0.057929	0.132117	-808.358	0.022218	0.070657	K0.01Na0.65Ca0.35Al1.35Si2.65O8	59.5116	0	25.6314	0	0	0	0	0	7.25994	7.47932	0.117763	0
2000	941	0.057546	0.131197	-803.072	0.022073	0.070187	K0.01Na0.65Ca0.35Al1.35Si2.65O8	59.5454	0	25.6085	0	0	0	0	0	7.23315	7.49452	0.118491	0
2000	940	0.057167	0.130285	-797.836	0.021929	0.06972	K0.01Na0.65Ca0.34Al1.34Si2.66O8	59.5791	0	25.5856	0	0	0	0	0	7.20642	7.50968	0.119222	0
2000	939	0.056792	0.129382	-792.647	0.021787	0.069258	K0.01Na0.65Ca0.34Al1.34Si2.66O8	59.6127	0	25.5628	0	0	0	0	0	7.17974	7.52481	0.119955	0
2000	938	0.05642	0.128488	-787.506	0.021645	0.0688	K0.01Na0.65Ca0.34Al1.34Si2.66O8	59.6463	0	25.54	0	0	0	0	0	7.15312	7.53991	0.120691	0
2000	937	0.056051	0.127602	-782.413	0.021505	0.068347	K0.01Na0.65Ca0.34Al1.34Si2.66O8	59.6798	0	25.5173	0	0	0	0	0	7.12655	7.55497	0.12143	0
2000	936	0.055686	0.126724	-777.366	0.021367	0.067898	K0.01Na0.65Ca0.34Al1.34Si2.66O8	59.7132	0	25.4946	0	0	0	0	0	7.10003	7.56999	0.122171	0
2000	935	0.055324	0.125855	-772.364	0.021229	0.067452	K0.01Na0.66Ca0.34Al1.34Si2.66O8	59.7466	0	25.472	0	0	0	0	0	7.07357	7.58499	0.122915	0
2000	934	0.054966	0.124993	-767.407	0.021093	0.067011	K0.01Na0.66Ca0.34Al1.34Si2.66O8	59.7799	0	25.4494	0	0	0	0	0	7.04717	7.59995	0.123662	0
2000	933	0.05461	0.124139	-762.495	0.020958	0.066574	K0.01Na0.66Ca0.34Al1.34Si2.66O8	59.8131	0	25.4268	0	0	0	0	0	7.02081	7.61487	0.124412	0
2000	932	0.054258	0.123293	-757.627	0.020824	0.066141	K0.01Na0.66Ca0.33Al1.33Si2.67O8	59.8462	0	25.4043	0	0	0	0	0	6.99451	7.62977	0.125164	0
2000	931	0.053909	0.122454	-752.801	0.020691	0.065712	K0.01Na0.66Ca0.33Al1.33Si2.67O8	59.8793	0	25.3819	0	0	0	0	0	6.96826	7.64463	0.12592	0
2000	930	0.053563	0.121623	-748.019	0.02056	0.065286	K0.01Na0.66Ca0.33Al1.33Si2.67O8	59.9124	0	25.3594	0	0	0	0	0	6.94207	7.65946	0.126678	0
2000	929	0.05322	0.1208	-743.278	0.02043	0.064864	K0.01Na0.66Ca0.33Al1.33Si2.67O8	59.9453	0	25.3371	0	0	0	0	0	6.91592	7.67426	0.127438	0
2000	928	0.05288	0.119984	-738.578	0.0203	0.064446	K0.01Na0.66Ca0.33Al1.33Si2.67O8	59.9782	0	25.3147	0	0	0	0	0	6.88983	7.68902	0.128202	0
2000	927	0.052543	0.119174	-733.919	0.020172	0.064032	K0.01Na0.67Ca0.33Al1.33Si2.67O8	60.011	0	25.2925	0	0	0	0	0	6.86378	7.70376	0.128968	0
2000	926	0.052209	0.118373	-729.301	0.020045	0.063621	K0.01Na0.67Ca0.33Al1.33Si2.67O8	60.0438	0	25.2702	0	0	0	0	0	6.83779	7.71846	0.129738	0
2000	925	0.051878	0.117578	-724.722	0.01992	0.063214	K0.01Na0.67Ca0.32Al1.32Si2.68O8	60.0765	0	25.248	0	0	0	0	0	6.81185	7.73313	0.13051	0
2000	924	0.05155	0.11679	-720.182	0.019795	0.06281	K0.01Na0.67Ca0.32Al1.32Si2.68O8	60.1091	0	25.2259	0	0	0	0	0	6.78595	7.74777	0.131285	0
2000	923	0.051224	0.116009	-715.681	0.019671	0.06241	K0.01Na0.67Ca0.32Al1.32Si2.68O8	60.1417	0	25.2037	0	0	0	0	0	6.76011	7.76238	0.132063	0
2000	922	0.050901	0.115234	-711.218	0.019548	0.062013	K0.01Na0.67Ca0.32Al1.32Si2.68O8	60.1742	0	25.1817	0	0	0	0	0	6.73431	7.77696	0.132843	0
2000	921	0.050581	0.114467	-706.792	0.019427	0.061619	K0.01Na0.67Ca0.32Al1.32Si2.68O8	60.2067	0	25.1596	0	0	0	0	0	6.70856	7.79151	0.133627	0
2000	920	0.050264	0.113705	-702.404	0.019306	0.061229	K0.01Na0.67Ca0.32Al1.32Si2.68O8	60.239	0	25.1377	0	0	0	0	0	6.68286	7.80603	0.134414	0
2000	919	0.049949	0.112951	-698.052	0.019186	0.060842	K0.01Na0.67Ca0.32Al1.32Si2.68O8	60.2714	0	25.1157	0	0	0	0	0	6.65721	7.82052	0.135203	0
2000	918	0.049637	0.112202	-693.736	0.019068	0.060459	K0.01Na0.68Ca0.32Al1.32Si2.68O8	60.3036	0	25.0938	0	0	0	0	0	6.6316	7.83498	0.135996	0
2000	917	0.049328	0.111461	-689.456	0.01895	0.060079	K0.01Na0.68Ca0.31Al1.31Si2.69O8	60.3359	0	25.0719	0	0	0	0	0	6.60604	7.84941	0.136791	0
2000	916	0.049021	0.110725	-685.211	0.018833	0.059701	K0.01Na0.68Ca0.31Al1.31Si2.69O8	60.368	0	25.0501	0	0	0	0	0	6.58052	7.86381	0.13759	0
2000	915	0.048716	0.109995	-681.001	0.018717	0.059327	K0.01Na0.68Ca0.31Al1.31Si2.69O8	60.4001	0	25.0283	0	0	0	0	0	6.55505	7.87818	0.138391	0
2000	914	0.048414	0.109272	-676.825	0.018602	0.058956	K0.01Na0.68Ca0.31Al1.31Si2.69O8	60.4321	0	25.0065	0	0	0	0	0	6.52963	7.89253	0.139195	0
2000	913	0.048115	0.108554	-672.683	0.018489	0.058588	K0.01Na0.68Ca0.31Al1.31Si2.69O8	60.4641	0	24.9848	0	0	0	0	0	6.50425	7.90684	0.140003	0
2000	912	0.047818	0.107843	-668.574	0.018375	0.058223	K0.01Na0.68Ca0.31Al1.31Si2.69O8	60.496	0	24.9631	0	0	0	0	0	6.47891	7.92113	0.140813	0
2000	911	0.047523	0.107137	-664.498	0.018263	0.057861	K0.01Na0.68Ca0.31Al1.31Si2.69O8	60.5279	0	24.9415	0	0	0	0	0	6.45362	7.93539	0.141627	0
2000	910	0.047231	0.106437	-660.455	0.018152	0.057502	K0.01Na0.69Ca0.31Al1.31Si2.69O8	60.5597	0	24.9199	0	0	0	0	0	6.42837	7.94962	0.142444	0
2000	909	0.046941	0.105743	-656.444	0.018042	0.057146	K0.01Na0.69Ca0.31Al1.31Si2.69O8	60.5914	0	24.8983	0	0	0	0	0	6.40317	7.96383	0.143263	0
2000	908	0.046653	0.105054	-652.465	0.017932	0.056793	K0.01Na0.69Ca0.30Al1.30Si2.70O8	60.6231	0	24.8768	0	0	0	0	0	6.378	7.97801	0.144086	0
2000	907	0.046368	0.104371	-648.517	0.017824	0.056442	K0.01Na0.69Ca0.30Al1.30Si2.70O8	60.6548	0	24.8553	0	0	0	0	0	6.35288	7.99216	0.144912	0
2000	906	0.046085	0.103694	-644.6	0.017716	0.056095	K0.01Na0.69Ca0.30Al1.30Si2.70O8	60.6864	0	24.8338	0	0	0	0	0	6.3278	8.00628	0.145741	0
2000	905	0.045804	0.103022	-640.714	0.017609	0.05575	K0.01Na0.69Ca0.30Al1.30Si2.70O8	60.7179	0	24.8124	0	0	0	0	0	6.30277	8.02038	0.146574	0
2000	904	0.045525	0.102355	-636.858	0.017503	0.055408	K0.01Na0.69Ca0.30Al1.30Si2.70O8	60.7494	0	24.791	0	0	0	0	0	6.27777	8.03445	0.147409	0
2000	903	0.045249	0.101694	-633.032	0.017398	0.055068	K0.01Na0.69Ca0.30Al1.30Si2.70O8	60.7808	0	24.7696	0	0	0	0	0	6.25281	8.0485	0.148248	0
2000	902	0.044975	0.101038	-629.235	0.017293	0.054732	K0.01Na0.69Ca0.30Al1.30Si2.70O8	60.8122	0	24.7483	0	0	0	0	0	6.2279	8.06252	0.14909	0
2000	901	0.044702	0.100387	-625.468	0.01719	0.054397	K0.01Na0.70Ca0.30Al1.30Si2.70O8	60.8435	0	24.727	0	0	0	0	0	6.20302	8.07651	0.149935	0
2000	900	0.044432	0.099741	-621.73	0.017087	0.054066	K0.01Na0.70Ca0.29Al1.29Si2.71O8	60.8748	0	24.7057	0	0	0	0	0	6.17819	8.09048	0.150783	0
clinopyroxene_1	thermodynamic	data	and	composition:
Pressure	Temperature	mass	S	H	V	Cp	structure	formula	SiO2	TiO2	Al2O3	Fe2O3	Cr2O3	FeO	MnO	MgO	CaO	Na2O	K2O	H2O
2000	1164	0.218929	0.522983	-2729.79	0.067523	0.269145	cpx	Na0.01Ca0.27Fe''0.35Mg1.29Fe'''0.02Ti0.00Al0.13Si1.93O6	53.3866	0.0294122	3.04684	0.825571	0	11.4694	0	24.0589	7.09258	0.0906922	0	0
2000	1163	0.223619	0.533933	-2786.88	0.06895	0.274807	cpx	Na0.01Ca0.27Fe''0.35Mg1.29Fe'''0.02Ti0.00Al0.13Si1.93O6	53.3695	0.0297977	3.04434	0.828772	0	11.5331	0	24.0115	7.0919	0.0910509	0	0
2000	1162	0.218911	0.522444	-2726.85	0.067478	0.268921	cpx	Na0.01Ca0.27Fe''0.35Mg1.29Fe'''0.02Ti0.00Al0.13Si1.93O6	53.3525	0.0301841	3.04185	0.831968	0	11.5969	0	23.9642	7.09102	0.0914074	0	0
2000	1161	0.21435	0.511317	-2668.72	0.066053	0.26322	cpx	Na0.01Ca0.27Fe''0.35Mg1.29Fe'''0.02Ti0.00Al0.13Si1.93O6	53.3354	0.0305712	3.03935	0.83516	0	11.6607	0	23.917	7.08994	0.0917615	0	0
2000	1160	0.209931	0.500538	-2612.39	0.064673	0.257697	cpx	Na0.01Ca0.27Fe''0.35Mg1.29Fe'''0.02Ti0.00Al0.13Si1.93O6	53.3184	0.0309591	3.03686	0.838348	0	11.7248	0	23.8699	7.08866	0.0921134	0	0
2000	1159	0.205647	0.490091	-2557.81	0.063334	0.252344	cpx	Na0.01Ca0.27Fe''0.36Mg1.28Fe'''0.02Ti0.00Al0.13Si1.93O6	53.3014	0.0313477	3.03437	0.841532	0	11.7889	0	23.8228	7.08719	0.0924629	0	0
2000	1158	0.201493	0.479963	-2504.88	0.062037	0.247154	cpx	Na0.01Ca0.27Fe''0.36Mg1.28Fe'''0.02Ti0.00Al0.13Si1.93O6	53.2843	0.0317371	3.03188	0.844713	0	11.8532	0	23.7758	7.08553	0.0928103	0	0
2000	1157	0.197463	0.47014	-2453.55	0.060778	0.24212	cpx	Na0.01Ca0.27Fe''0.36Mg1.28Fe'''0.02Ti0.00Al0.13Si1.93O6	53.2673	0.0321272	3.02939	0.847891	0	11.9176	0	23.7288	7.08368	0.0931553	0	0
2000	1156	0.193553	0.460611	-2403.76	0.059557	0.237237	cpx	Na0.01Ca0.27Fe''0.36Mg1.28Fe'''0.02Ti0.00Al0.13Si1.93O6	53.2502	0.032518	3.0269	0.851065	0	11.9822	0	23.682	7.08163	0.0934982	0	0
2000	1155	0.189758	0.451364	-2355.43	0.058372	0.232498	cpx	Na0.01Ca0.27Fe''0.36Mg1.27Fe'''0.02Ti0.00Al0.13Si1.93O6	53.2332	0.0329095	3.02442	0.854237	0	12.0469	0	23.6351	7.0794	0.0938388	0	0
2000	1154	0.186072	0.442387	-2308.52	0.057222	0.227897	cpx	Na0.01Ca0.27Fe''0.37Mg1.27Fe'''0.02Ti0.00Al0.13Si1.93O6	53.2161	0.0333017	3.02194	0.857407	0	12.1118	0	23.5883	7.07698	0.0941771	0	0
2000	1153	0.182493	0.43367	-2262.96	0.056104	0.223429	cpx	Na0.01Ca0.27Fe''0.37Mg1.27Fe'''0.02Ti0.00Al0.13Si1.93O6	53.199	0.0336944	3.01946	0.860575	0	12.1768	0	23.5416	7.07437	0.0945133	0	0
2000	1152	0.179015	0.425203	-2218.71	0.055019	0.219089	cpx	Na0.01Ca0.27Fe''0.37Mg1.27Fe'''0.02Ti0.00Al0.13Si1.93O6	53.1819	0.0340879	3.01698	0.863741	0	12.242	0	23.4949	7.07158	0.0948473	0	0
2000	1151	0.175636	0.416976	-2175.71	0.053964	0.214872	cpx	Na0.01Ca0.27Fe''0.37Mg1.27Fe'''0.02Ti0.00Al0.13Si1.93O6	53.1648	0.0344819	3.0145	0.866906	0	12.3073	0	23.4482	7.06861	0.0951791	0	0
2000	1150	0.17235	0.408981	-2133.92	0.052939	0.210774	cpx	Na0.01Ca0.27Fe''0.38Mg1.26Fe'''0.02Ti0.00Al0.13Si1.93O6	53.1477	0.0348765	3.01202	0.87007	0	12.3728	0	23.4016	7.06545	0.0955087	0	0
2000	1149	0.169155	0.401207	-2093.29	0.051942	0.206789	cpx	Na0.01Ca0.27Fe''0.38Mg1.26Fe'''0.02Ti0.00Al0.13Si1.93O6	53.1305	0.0352717	3.00955	0.873233	0	12.4385	0	23.355	7.06211	0.0958361	0	0
2000	1148	0.166048	0.393648	-2053.77	0.050973	0.202913	cpx	Na0.01Ca0.27Fe''0.38Mg1.26Fe'''0.02Ti0.00Al0.13Si1.93O6	53.1133	0.0356674	3.00708	0.876395	0	12.5043	0	23.3085	7.0586	0.0961614	0	0
2000	1147	0.163024	0.386295	-2015.33	0.05003	0.199144	cpx	Na0.01Ca0.27Fe''0.38Mg1.26Fe'''0.02Ti0.00Al0.13Si1.93O6	53.0962	0.0360637	3.0046	0.879557	0	12.5703	0	23.2619	7.0549	0.0964845	0	0
2000	1146	0.160081	0.37914	-1977.93	0.049112	0.195475	cpx	Na0.01Ca0.27Fe''0.38Mg1.26Fe'''0.02Ti0.00Al0.13Si1.93O6	53.079	0.0364604	3.00213	0.88272	0	12.6365	0	23.2154	7.05103	0.0968055	0	0
2000	1145	0.157217	0.372177	-1941.53	0.048219	0.191905	cpx	Na0.01Ca0.27Fe''0.39Mg1.25Fe'''0.02Ti0.00Al0.13Si1.93O6	53.0617	0.0368577	2.99967	0.885882	0	12.7029	0	23.1689	7.04698	0.0971243	0	0
2000	1144	0.154428	0.365398	-1906.09	0.047349	0.188429	cpx	Na0.01Ca0.27Fe''0.39Mg1.25Fe'''0.02Ti0.00Al0.13Si1.93O6	53.0445	0.0372555	2.9972	0.889045	0	12.7694	0	23.1224	7.04276	0.0974409	0	0
2000	1143	0.151711	0.358798	-1871.58	0.046502	0.185045	cpx	Na0.01Ca0.27Fe''0.39Mg1.25Fe'''0.02Ti0.00Al0.13Si1.93O6	53.0272	0.0376537	2.99473	0.892209	0	12.8362	0	23.0759	7.03837	0.0977555	0	0
2000	1142	0.149064	0.352369	-1837.96	0.045677	0.181748	cpx	Na0.01Ca0.27Fe''0.39Mg1.25Fe'''0.02Ti0.00Al0.13Si1.93O6	53.0099	0.0380524	2.99227	0.895374	0	12.9031	0	23.0294	7.03381	0.0980679	0	0
2000	1141	0.146485	0.346106	-1805.21	0.044873	0.178536	cpx	Na0.01Ca0.27Fe''0.39Mg1.25Fe'''0.02Ti0.00Al0.13Si1.93O6	52.9926	0.0384515	2.98981	0.89854	0	12.9702	0	22.9829	7.02907	0.0983781	0	0
2000	1140	0.143972	0.340003	-1773.3	0.04409	0.175405	cpx	Na0.01Ca0.27Fe''0.40Mg1.24Fe'''0.02Ti0.00Al0.13Si1.93O6	52.9752	0.038851	2.98735	0.901709	0	13.0376	0	22.9364	7.02417	0.0986863	0	0
2000	1139	0.141521	0.334054	-1742.19	0.043326	0.172354	cpx	Na0.01Ca0.27Fe''0.40Mg1.24Fe'''0.02Ti0.00Al0.13Si1.93O6	52.9578	0.0392509	2.98489	0.904879	0	13.1051	0	22.89	7.0191	0.0989923	0	0
2000	1138	0.139131	0.328255	-1711.86	0.042582	0.16938	cpx	Na0.01Ca0.27Fe''0.40Mg1.24Fe'''0.02Ti0.00Al0.13Si1.93O6	52.9404	0.0396512	2.98243	0.908051	0	13.1728	0	22.8434	7.01387	0.0992962	0	0
2000	1137	0.1368	0.322599	-1682.28	0.041856	0.166479	cpx	Na0.01Ca0.27Fe''0.40Mg1.24Fe'''0.02Ti0.00Al0.13Si1.93O6	52.923	0.0400519	2.97998	0.911226	0	13.2408	0	22.7969	7.00847	0.0995981	0	0
2000	1136	0.134527	0.317084	-1653.43	0.041147	0.163649	cpx	Na0.01Ca0.27Fe''0.41Mg1.23Fe'''0.03Ti0.00Al0.13Si1.93O6	52.9055	0.0404529	2.97752	0.914404	0	13.3089	0	22.7504	7.0029	0.0998978	0	0
2000	1135	0.132308	0.311703	-1625.28	0.040456	0.160889	cpx	Na0.01Ca0.27Fe''0.41Mg1.23Fe'''0.03Ti0.00Al0.13Si1.93O6	52.888	0.0408542	2.97507	0.917584	0	13.3773	0	22.7038	6.99718	0.100195	0	0
2000	1134	0.130142	0.306452	-1597.82	0.039782	0.158195	cpx	Na0.01Ca0.27Fe''0.41Mg1.23Fe'''0.03Ti0.00Al0.13Si1.93O6	52.8704	0.0412559	2.97262	0.920769	0	13.4459	0	22.6572	6.99129	0.100491	0	0
2000	1133	0.128028	0.301328	-1571.01	0.039124	0.155566	cpx	Na0.01Ca0.27Fe''0.41Mg1.23Fe'''0.03Ti0.00Al0.13Si1.93O6	52.8529	0.0416578	2.97017	0.923957	0	13.5147	0	22.6106	6.98524	0.100784	0	0
2000	1132	0.125964	0.296326	-1544.84	0.038481	0.152999	cpx	Na0.01Ca0.27Fe''0.41Mg1.23Fe'''0.03Ti0.00Al0.13Si1.93O6	52.8352	0.04206	2.96772	0.927148	0	13.5837	0	22.564	6.97904	0.101076	0	0
2000	1131	0.123949	0.291442	-1519.29	0.037854	0.150493	cpx	Na0.01Ca0.27Fe''0.42Mg1.22Fe'''0.03Ti0.00Al0.13Si1.93O6	52.8176	0.0424625	2.96528	0.930344	0	13.653	0	22.5173	6.97268	0.101365	0	0
2000	1130	0.12198	0.286673	-1494.33	0.037241	0.148045	cpx	Na0.01Ca0.27Fe''0.42Mg1.22Fe'''0.03Ti0.00Al0.13Si1.93O6	52.7999	0.0428653	2.96284	0.933545	0	13.7225	0	22.4706	6.96616	0.101652	0	0
[truncated: 2,557 more rows]
[truncated: 1 more columns]
