# Supplementary material for: A 5-km-thick reservoir with > 380,000 km3 of magma within the ancient Earth's crust
Source: Sci Rep. 2022 Sep 19;12:15651. doi: 10.1038/s41598-022-19915-w (PMC9485162; doi:10.1038/s41598-022-19915-w)
Supplement: Supplementary file 20 — Supplementary Information 20. [file 41598_2022_19915_MOESM20_ESM.xlsx]

## Sheet: O60
SupplTable S4B-6 - Fractional crystallization of the mix O60R40
System	Thermodynamic	Data:
Pressure	Temperature	mass	F	phi	S	H	V	dVdP*10^6	dVdT*10^6	Cp	logfO2(absolute)	logfO2-QFM	rhol	rhos	viscosity	aH2O	chisqr
2000	1400	99.9982	1	1	292.571	-1.23588e+06	39.6189	-306.716	2919.37	150.808	-6.318	0	2.524	0	2.087	0.0416076	0
2000	1400	99.9982	1	1	292.571	-1.23588e+06	39.6189	-306.716	2919.37	150.808	-6.318	0	2.524	0	2.087	0.0416076	0
2000	1399	99.9982	1	1	292.481	-1.23603e+06	39.616	-306.692	2919.28	150.808	-6.327	0	2.52419	0	2.091	0.0416027	0
2000	1398	99.9982	1	1	292.39	-1.23619e+06	39.6131	-306.669	2919.19	150.808	-6.336	0	2.52437	0	2.095	0.0415977	0
2000	1397	99.9982	1	1	292.3	-1.23634e+06	39.6102	-306.646	2919.1	150.808	-6.345	0	2.52456	0	2.099	0.0415928	0
2000	1396	99.9982	1	1	292.21	-1.23649e+06	39.6073	-306.622	2919.01	150.807	-6.353	0	2.52474	0	2.103	0.0415879	0
2000	1395	99.9982	1	1	292.12	-1.23664e+06	39.6044	-306.599	2918.91	150.807	-6.362	0	2.52493	0	2.107	0.041583	0
2000	1394	99.9982	1	1	292.029	-1.23679e+06	39.6014	-306.575	2918.82	150.807	-6.371	0	2.52512	0	2.111	0.0415781	0
2000	1393	99.9982	1	1	291.939	-1.23694e+06	39.5985	-306.552	2918.73	150.807	-6.38	0	2.5253	0	2.115	0.0415731	0
2000	1392	99.9983	1	1	291.848	-1.23709e+06	39.5956	-306.529	2918.64	150.806	-6.388	0	2.52549	0	2.119	0.0415682	0
2000	1391	99.9983	1	1	291.758	-1.23724e+06	39.5927	-306.505	2918.55	150.806	-6.397	0	2.52567	0	2.122	0.0415633	0
2000	1390	99.9983	1	1	291.667	-1.23739e+06	39.5898	-306.482	2918.45	150.806	-6.406	0	2.52586	0	2.126	0.0415584	0
2000	1389	99.9983	1	1	291.576	-1.23754e+06	39.5869	-306.459	2918.36	150.806	-6.415	0	2.52604	0	2.13	0.0415536	0
2000	1388	99.9983	1	1	291.486	-1.2377e+06	39.584	-306.435	2918.27	150.806	-6.424	0	2.52623	0	2.134	0.0415487	0
2000	1387	99.9983	1	1	291.395	-1.23785e+06	39.5811	-306.412	2918.17	150.805	-6.433	0	2.52642	0	2.138	0.0415438	0
2000	1386	99.9983	1	1	291.304	-1.238e+06	39.5782	-306.389	2918.08	150.805	-6.442	0	2.5266	0	2.142	0.0415389	0
2000	1385	99.9983	1	1	291.213	-1.23815e+06	39.5753	-306.366	2917.98	150.805	-6.45	0	2.52679	0	2.146	0.041534	0
2000	1384	99.9983	1	1	291.122	-1.2383e+06	39.5724	-306.342	2917.89	150.805	-6.459	0	2.52697	0	2.15	0.0415292	0
2000	1383	99.9984	1	1	291.031	-1.23845e+06	39.5695	-306.319	2917.79	150.804	-6.468	0	2.52716	0	2.154	0.0415243	0
2000	1382	99.9984	1	1	290.94	-1.2386e+06	39.5666	-306.296	2917.7	150.804	-6.477	0	2.52735	0	2.158	0.0415195	0
2000	1381	99.9984	1	1	290.849	-1.23875e+06	39.5637	-306.273	2917.6	150.804	-6.486	0	2.52753	0	2.162	0.0415146	0
2000	1380	99.9984	1	1	290.758	-1.2389e+06	39.5607	-306.249	2917.5	150.804	-6.495	0	2.52772	0	2.166	0.0415098	0
2000	1379	99.9984	1	1	290.667	-1.23905e+06	39.5578	-306.226	2917.4	150.804	-6.504	0	2.5279	0	2.17	0.041505	0
2000	1378	99.9984	1	1	290.575	-1.2392e+06	39.5549	-306.203	2917.31	150.803	-6.513	0	2.52809	0	2.174	0.0415001	0
2000	1377	99.9984	1	1	290.484	-1.23936e+06	39.552	-306.18	2917.21	150.803	-6.522	0	2.52828	0	2.178	0.0414953	0
2000	1376	99.9985	1	1	290.393	-1.23951e+06	39.5491	-306.157	2917.11	150.803	-6.531	0	2.52846	0	2.182	0.0414905	0
2000	1375	99.9985	1	1	290.301	-1.23966e+06	39.5462	-306.134	2917.01	150.803	-6.54	0	2.52865	0	2.186	0.0414857	0
2000	1374	99.9985	1	1	290.21	-1.23981e+06	39.5433	-306.11	2916.91	150.802	-6.549	0	2.52883	0	2.19	0.0414809	0
2000	1373	99.9985	1	1	290.118	-1.23996e+06	39.5404	-306.087	2916.81	150.802	-6.558	0	2.52902	0	2.194	0.0414761	0
2000	1372	99.9985	1	1	290.026	-1.24011e+06	39.5375	-306.064	2916.71	150.802	-6.567	0	2.52921	0	2.198	0.0414713	0
2000	1371	99.9985	1	1	289.935	-1.24026e+06	39.5346	-306.041	2916.61	150.802	-6.576	0	2.52939	0	2.202	0.0414665	0
2000	1370	99.9985	1	1	289.843	-1.24041e+06	39.5317	-306.018	2916.51	150.802	-6.585	0	2.52958	0	2.206	0.0414617	0
2000	1369	99.9985	1	1	289.751	-1.24056e+06	39.5288	-305.995	2916.41	150.801	-6.594	0	2.52976	0	2.21	0.0414569	0
2000	1368	99.9986	1	1	289.66	-1.24071e+06	39.5259	-305.972	2916.31	150.801	-6.603	0	2.52995	0	2.214	0.0414521	0
2000	1367	99.9986	1	1	289.568	-1.24087e+06	39.523	-305.949	2916.21	150.801	-6.612	0	2.53014	0	2.218	0.0414474	0
2000	1366	99.9986	1	1	289.476	-1.24102e+06	39.5201	-305.926	2916.11	150.801	-6.621	0	2.53032	0	2.222	0.0414426	0
2000	1365	99.9986	1	1	289.384	-1.24117e+06	39.5172	-305.903	2916.01	150.8	-6.63	0	2.53051	0	2.226	0.0414379	0
2000	1364	99.9986	1	1	289.292	-1.24132e+06	39.5143	-305.88	2915.9	150.8	-6.64	0	2.5307	0	2.23	0.0414331	0
2000	1363	99.9986	1	1	289.2	-1.24147e+06	39.5114	-305.857	2915.8	150.8	-6.649	0	2.53088	0	2.234	0.0414284	0
2000	1362	99.9987	1	1	289.107	-1.24162e+06	39.5085	-305.834	2915.7	150.8	-6.658	0	2.53107	0	2.238	0.0414237	0
2000	1361	99.9987	1	1	289.015	-1.24177e+06	39.5056	-305.811	2915.59	150.8	-6.667	0	2.53125	0	2.242	0.0414189	0
2000	1360	99.9987	1	1	288.923	-1.24192e+06	39.5027	-305.788	2915.49	150.799	-6.676	0	2.53144	0	2.246	0.0414142	0
2000	1359	99.9987	1	1	288.831	-1.24207e+06	39.4998	-305.765	2915.38	150.799	-6.685	0	2.53163	0	2.251	0.0414095	0
2000	1358	99.9987	1	1	288.738	-1.24222e+06	39.4969	-305.742	2915.28	150.799	-6.694	0	2.53181	0	2.255	0.0414048	0
2000	1357	99.9987	1	1	288.646	-1.24238e+06	39.494	-305.719	2915.17	150.799	-6.704	0	2.532	0	2.259	0.0414001	0
2000	1356	99.9987	1	1	288.553	-1.24253e+06	39.4911	-305.697	2915.07	150.799	-6.713	0	2.53219	0	2.263	0.0413954	0
2000	1355	99.9988	1	1	288.461	-1.24268e+06	39.4882	-305.674	2914.96	150.798	-6.722	0	2.53237	0	2.267	0.0413907	0
2000	1354	99.9988	1	1	288.368	-1.24283e+06	39.4853	-305.651	2914.86	150.798	-6.731	0	2.53256	0	2.271	0.041386	0
2000	1353	99.9988	1	1	288.275	-1.24298e+06	39.4824	-305.628	2914.75	150.798	-6.741	0	2.53275	0	2.275	0.0413814	0
2000	1352	99.9988	1	1	288.183	-1.24313e+06	39.4795	-305.605	2914.64	150.798	-6.75	0	2.53293	0	2.279	0.0413767	0
2000	1351	99.9988	1	1	288.09	-1.24328e+06	39.4766	-305.582	2914.54	150.798	-6.759	0	2.53312	0	2.283	0.041372	0
2000	1350	99.9988	1	1	287.997	-1.24343e+06	39.4737	-305.56	2914.43	150.797	-6.768	0	2.5333	0	2.287	0.0413674	0
2000	1349	99.9989	1	1	287.904	-1.24358e+06	39.4708	-305.537	2914.32	150.797	-6.778	0	2.53349	0	2.292	0.0413627	0
2000	1348	99.9989	1	1	287.811	-1.24374e+06	39.4679	-305.514	2914.21	150.797	-6.787	0	2.53368	0	2.296	0.0413581	0
2000	1347	99.9989	1	1	287.718	-1.24389e+06	39.465	-305.491	2914.1	150.797	-6.796	0	2.53387	0	2.3	0.0413534	0
2000	1346	99.9989	1	1	287.625	-1.24404e+06	39.4621	-305.468	2913.99	150.797	-6.806	0	2.53405	0	2.304	0.0413488	0
2000	1345	99.9989	1	1	287.532	-1.24419e+06	39.4592	-305.446	2913.88	150.796	-6.815	0	2.53424	0	2.308	0.0413442	0
2000	1344	99.9989	1	1	287.439	-1.24434e+06	39.4563	-305.423	2913.77	150.796	-6.824	0	2.53443	0	2.312	0.0413396	0
2000	1343	99.999	1	1	287.346	-1.24449e+06	39.4534	-305.4	2913.66	150.796	-6.834	0	2.53461	0	2.316	0.041335	0
2000	1342	99.999	1	1	287.252	-1.24464e+06	39.4505	-305.378	2913.55	150.796	-6.843	0	2.5348	0	2.321	0.0413304	0
2000	1341	99.999	1	1	287.159	-1.24479e+06	39.4476	-305.355	2913.44	150.796	-6.852	0	2.53498	0	2.325	0.0413258	0
2000	1340	99.999	1	1	287.066	-1.24494e+06	39.4447	-305.332	2913.33	150.795	-6.862	0	2.53517	0	2.329	0.0413212	0
2000	1339	99.999	1	1	286.972	-1.24509e+06	39.4418	-305.31	2913.22	150.795	-6.871	0	2.53536	0	2.333	0.0413166	0
2000	1338	99.9991	1	1	286.879	-1.24525e+06	39.4389	-305.287	2913.11	150.795	-6.88	0	2.53554	0	2.337	0.0413121	0
2000	1337	99.9991	1	1	286.785	-1.2454e+06	39.436	-305.264	2912.99	150.795	-6.89	0	2.53573	0	2.342	0.0413075	0
2000	1336	99.9991	1	1	286.691	-1.24555e+06	39.4331	-305.242	2912.88	150.795	-6.899	0	2.53592	0	2.346	0.041303	0
2000	1335	99.9991	1	1	286.598	-1.2457e+06	39.4302	-305.219	2912.77	150.795	-6.909	0	2.53611	0	2.35	0.0412984	0
2000	1334	99.9991	1	1	286.504	-1.24585e+06	39.4273	-305.197	2912.65	150.794	-6.918	0	2.53629	0	2.354	0.0412939	0
2000	1333	99.9991	1	1	286.41	-1.246e+06	39.4244	-305.174	2912.54	150.794	-6.928	0	2.53648	0	2.358	0.0412893	0
2000	1332	99.9992	1	1	286.316	-1.24615e+06	39.4215	-305.151	2912.42	150.794	-6.937	0	2.53667	0	2.363	0.0412848	0
2000	1331	99.9992	1	1	286.222	-1.2463e+06	39.4186	-305.129	2912.31	150.794	-6.947	0	2.53685	0	2.367	0.0412803	0
2000	1330	99.9992	1	1	286.128	-1.24645e+06	39.4157	-305.106	2912.19	150.794	-6.956	0	2.53704	0	2.371	0.0412758	0
2000	1329	99.9992	1	1	286.034	-1.24661e+06	39.4128	-305.084	2912.08	150.793	-6.966	0	2.53723	0	2.375	0.0412713	0
2000	1328	99.9992	1	1	285.94	-1.24676e+06	39.4099	-305.061	2911.96	150.793	-6.975	0	2.53741	0	2.379	0.0412668	0
2000	1327	99.9993	1	1	285.846	-1.24691e+06	39.407	-305.039	2911.85	150.793	-6.985	0	2.5376	0	2.384	0.0412623	0
2000	1326	99.9993	1	1	285.752	-1.24706e+06	39.4041	-305.016	2911.73	150.793	-6.994	0	2.53779	0	2.388	0.0412579	0
2000	1325	99.9993	1	1	285.657	-1.24721e+06	39.4012	-304.994	2911.61	150.793	-7.004	0	2.53797	0	2.392	0.0412534	0
2000	1324	99.9993	1	1	285.563	-1.24736e+06	39.3983	-304.972	2911.5	150.793	-7.013	0	2.53816	0	2.396	0.0412489	0
2000	1323	99.9993	1	1	285.469	-1.24751e+06	39.3955	-304.949	2911.38	150.792	-7.023	0	2.53835	0	2.401	0.0412445	0
2000	1322	99.9994	1	1	285.374	-1.24766e+06	39.3926	-304.927	2911.26	150.792	-7.033	0	2.53853	0	2.405	0.04124	0
2000	1321	99.9994	1	1	285.28	-1.24781e+06	39.3897	-304.904	2911.14	150.792	-7.042	0	2.53872	0	2.409	0.0412356	0
2000	1320	99.9994	1	1	285.185	-1.24796e+06	39.3868	-304.882	2911.02	150.792	-7.052	0	2.53891	0	2.414	0.0412312	0
2000	1319	99.9994	1	1	285.091	-1.24812e+06	39.3839	-304.86	2910.9	150.792	-7.062	0	2.5391	0	2.418	0.0412267	0
2000	1318	99.9994	1	1	284.996	-1.24827e+06	39.381	-304.837	2910.78	150.791	-7.071	0	2.53928	0	2.422	0.0412223	0
2000	1317	99.9995	1	1	284.901	-1.24842e+06	39.3781	-304.815	2910.66	150.791	-7.081	0	2.53947	0	2.426	0.0412179	0
2000	1316	99.9995	1	1	284.806	-1.24857e+06	39.3752	-304.793	2910.54	150.791	-7.09	0	2.53966	0	2.431	0.0412135	0
2000	1315	99.9995	1	1	284.711	-1.24872e+06	39.3723	-304.77	2910.42	150.791	-7.1	0	2.53984	0	2.435	0.0412092	0
2000	1314	99.9995	1	1	284.617	-1.24887e+06	39.3694	-304.748	2910.3	150.791	-7.11	0	2.54003	0	2.439	0.0412048	0
2000	1313	99.9995	1	1	284.522	-1.24902e+06	39.3665	-304.726	2910.18	150.791	-7.12	0	2.54022	0	2.444	0.0412004	0
2000	1312	99.9996	1	1	284.426	-1.24917e+06	39.3636	-304.703	2910.06	150.79	-7.129	0	2.5404	0	2.448	0.0411961	0
2000	1311	99.9996	1	1	284.331	-1.24932e+06	39.3608	-304.681	2909.94	150.79	-7.139	0	2.54059	0	2.452	0.0411917	0
2000	1310	99.9996	1	1	284.236	-1.24948e+06	39.3579	-304.659	2909.82	150.79	-7.149	0	2.54078	0	2.457	0.0411874	0
2000	1309	99.9996	1	1	284.141	-1.24963e+06	39.355	-304.637	2909.69	150.79	-7.159	0	2.54097	0	2.461	0.041183	0
2000	1308	99.9997	1	1	284.046	-1.24978e+06	39.3521	-304.615	2909.57	150.79	-7.168	0	2.54115	0	2.465	0.0411787	0
2000	1307	99.9997	1	1	283.95	-1.24993e+06	39.3492	-304.592	2909.45	150.79	-7.178	0	2.54134	0	2.47	0.0411744	0
2000	1306	99.9997	1	1	283.855	-1.25008e+06	39.3463	-304.57	2909.32	150.789	-7.188	0	2.54153	0	2.474	0.0411701	0
2000	1305	99.9997	1	1	283.759	-1.25023e+06	39.3434	-304.548	2909.2	150.789	-7.198	0	2.54171	0	2.478	0.0411658	0
2000	1304	99.9998	1	1	283.664	-1.25038e+06	39.3405	-304.526	2909.07	150.789	-7.208	0	2.5419	0	2.483	0.0411615	0
2000	1303	99.9998	1	1	283.568	-1.25053e+06	39.3376	-304.504	2908.95	150.789	-7.217	0	2.54209	0	2.487	0.0411572	0
2000	1302	99.9998	1	1	283.473	-1.25068e+06	39.3347	-304.482	2908.82	150.789	-7.227	0	2.54228	0	2.492	0.041153	0
2000	1301	99.9998	1	1	283.377	-1.25084e+06	39.3319	-304.46	2908.7	150.789	-7.237	0	2.54246	0	2.496	0.0411487	0
2000	1300	99.9998	1	1	283.281	-1.25099e+06	39.329	-304.437	2908.57	150.788	-7.247	0	2.54265	0	2.5	0.0411445	0
2000	1299	99.9999	1	1	283.185	-1.25114e+06	39.3261	-304.415	2908.45	150.788	-7.257	0	2.54284	0	2.505	0.0411402	0
2000	1298	99.9999	1	1	283.089	-1.25129e+06	39.3232	-304.393	2908.32	150.788	-7.267	0	2.54303	0	2.509	0.041136	0
2000	1297	99.9999	1	1	282.994	-1.25144e+06	39.3203	-304.371	2908.19	150.788	-7.277	0	2.54321	0	2.514	0.0411318	0
2000	1296	99.9999	1	1	282.898	-1.25159e+06	39.3174	-304.349	2908.06	150.788	-7.287	0	2.5434	0	2.518	0.0411275	0
2000	1295	100	1	1	282.801	-1.25174e+06	39.3145	-304.327	2907.94	150.788	-7.296	0	2.54359	0	2.522	0.0411233	0
2000	1294	100	1	1	282.705	-1.25189e+06	39.3116	-304.305	2907.81	150.787	-7.306	0	2.54378	0	2.527	0.0411191	0
2000	1293	100	1	1	282.609	-1.25204e+06	39.3088	-304.283	2907.68	150.787	-7.316	0	2.54396	0	2.531	0.041115	0
2000	1292	100	1	1	282.513	-1.2522e+06	39.3059	-304.261	2907.55	150.787	-7.326	0	2.54415	0	2.536	0.0411108	0
2000	1291	100	1	1	282.417	-1.25235e+06	39.303	-304.239	2907.42	150.787	-7.336	0	2.54434	0	2.54	0.0411066	0
2000	1290	100	1	1	282.32	-1.2525e+06	39.3001	-304.217	2907.29	150.787	-7.346	0	2.54453	0	2.545	0.0411025	0
2000	1289	100	1	1	282.224	-1.25265e+06	39.2972	-304.195	2907.16	150.787	-7.356	0	2.54471	0	2.549	0.0410983	0
2000	1288	100	1	1	282.127	-1.2528e+06	39.2943	-304.174	2907.03	150.787	-7.366	0	2.5449	0	2.553	0.0410942	0
2000	1287	100	1	1	282.031	-1.25295e+06	39.2914	-304.152	2906.9	150.786	-7.376	0	2.54509	0	2.558	0.0410901	0
2000	1286	100	1	1	281.934	-1.2531e+06	39.2886	-304.13	2906.77	150.786	-7.386	0	2.54528	0	2.562	0.041086	0
2000	1285	100	1	1	281.837	-1.25325e+06	39.2857	-304.108	2906.64	150.786	-7.396	0	2.54546	0	2.567	0.0410819	0
2000	1284	100	1	1	281.741	-1.2534e+06	39.2828	-304.086	2906.51	150.786	-7.407	0	2.54565	0	2.571	0.0410778	0
2000	1283	100	1	1	281.644	-1.25356e+06	39.2799	-304.064	2906.37	150.786	-7.417	0	2.54584	0	2.576	0.0410737	0
2000	1282	100	1	1	281.547	-1.25371e+06	39.277	-304.042	2906.24	150.786	-7.427	0	2.54603	0	2.58	0.0410696	0
2000	1281	100	1	1	281.45	-1.25386e+06	39.2741	-304.021	2906.11	150.786	-7.437	0	2.54621	0	2.585	0.0410655	0
2000	1280	100	1	1	281.353	-1.25401e+06	39.2713	-303.999	2905.98	150.785	-7.447	0	2.5464	0	2.589	0.0410615	0
2000	1279	100	1	1	281.256	-1.25416e+06	39.2684	-303.977	2905.84	150.785	-7.457	0	2.54659	0	2.594	0.0410574	0
2000	1278	100	1	1	281.159	-1.25431e+06	39.2655	-303.955	2905.71	150.785	-7.467	0	2.54678	0	2.598	0.0410534	0
2000	1277	100	1	1	281.062	-1.25446e+06	39.2626	-303.934	2905.57	150.785	-7.477	0	2.54696	0	2.603	0.0410494	0
2000	1276	100	1	1	280.964	-1.25461e+06	39.2597	-303.912	2905.44	150.785	-7.488	0	2.54715	0	2.607	0.0410454	0
2000	1275	100	1	1	280.867	-1.25477e+06	39.2568	-303.89	2905.31	150.785	-7.498	0	2.54734	0	2.612	0.0410414	0
2000	1274	100.001	1	1	280.77	-1.25492e+06	39.254	-303.868	2905.17	150.785	-7.508	0	2.54753	0	2.616	0.0410374	0
2000	1273	100.001	1	1	280.672	-1.25507e+06	39.2511	-303.847	2905.03	150.784	-7.518	0	2.54771	0	2.621	0.0410334	0
2000	1272	100.001	1	1	280.575	-1.25522e+06	39.2482	-303.825	2904.9	150.784	-7.528	0	2.5479	0	2.626	0.0410295	0
2000	1271	100.001	1	1	280.477	-1.25537e+06	39.2453	-303.803	2904.76	150.784	-7.539	0	2.54809	0	2.63	0.0410255	0
2000	1270	100.001	1	1	280.38	-1.25552e+06	39.2424	-303.782	2904.62	150.784	-7.549	0	2.54828	0	2.635	0.0410216	0
2000	1269	100.001	1	1	280.282	-1.25567e+06	39.2396	-303.76	2904.49	150.784	-7.559	0	2.54847	0	2.639	0.0410176	0
2000	1268	100.001	1	1	280.184	-1.25582e+06	39.2367	-303.739	2904.35	150.784	-7.57	0	2.54865	0	2.644	0.0410137	0
2000	1267	100.001	1	1	280.086	-1.25597e+06	39.2338	-303.717	2904.21	150.784	-7.58	0	2.54884	0	2.648	0.0410098	0
2000	1266	100.001	1	1	279.988	-1.25613e+06	39.2309	-303.695	2904.07	150.784	-7.59	0	2.54903	0	2.653	0.0410059	0
2000	1265	100.001	1	1	279.891	-1.25628e+06	39.228	-303.674	2903.94	150.783	-7.6	0	2.54922	0	2.658	0.041002	0
2000	1264	100.001	1	1	279.793	-1.25643e+06	39.2252	-303.652	2903.8	150.783	-7.611	0	2.5494	0	2.662	0.0409981	0
2000	1263	100.001	1	1	279.694	-1.25658e+06	39.2223	-303.631	2903.66	150.783	-7.621	0	2.54959	0	2.667	0.0409943	0
2000	1262	100.001	1	1	279.596	-1.25673e+06	39.2194	-303.609	2903.52	150.783	-7.632	0	2.54978	0	2.671	0.0409904	0
2000	1261	100.001	1	1	279.498	-1.25688e+06	39.2165	-303.588	2903.38	150.783	-7.642	0	2.54997	0	2.676	0.0409866	0
2000	1260	100.001	1	1	279.4	-1.25703e+06	39.2137	-303.566	2903.24	150.783	-7.652	0	2.55016	0	2.681	0.0409828	0
2000	1259	100.001	1	1	279.302	-1.25718e+06	39.2108	-303.545	2903.1	150.783	-7.663	0	2.55034	0	2.685	0.0409789	0
2000	1258	100.001	1	1	279.203	-1.25734e+06	39.2079	-303.523	2902.96	150.783	-7.673	0	2.55053	0	2.69	0.0409751	0
2000	1257	100.001	1	1	279.105	-1.25749e+06	39.205	-303.502	2902.81	150.782	-7.684	0	2.55072	0	2.695	0.0409713	0
2000	1256	100.001	1	1	279.006	-1.25764e+06	39.2021	-303.481	2902.67	150.782	-7.694	0	2.55091	0	2.699	0.0409676	0
2000	1255	100.001	1	1	278.908	-1.25779e+06	39.1993	-303.459	2902.53	150.782	-7.704	0	2.5511	0	2.704	0.0409638	0
2000	1254	100.001	1	1	278.809	-1.25794e+06	39.1964	-303.438	2902.39	150.782	-7.715	0	2.55128	0	2.708	0.04096	0
2000	1253	100.001	1	1	278.71	-1.25809e+06	39.1935	-303.416	2902.25	150.782	-7.725	0	2.55147	0	2.713	0.0409563	0
2000	1252	100.001	1	1	278.612	-1.25824e+06	39.1906	-303.395	2902.1	150.782	-7.736	0	2.55166	0	2.718	0.0409526	0
2000	1251	100.001	1	1	278.513	-1.25839e+06	39.1878	-303.374	2901.96	150.782	-7.746	0	2.55185	0	2.722	0.0409488	0
2000	1250	100.001	1	1	278.414	-1.25855e+06	39.1849	-303.352	2901.81	150.782	-7.757	0	2.55204	0	2.727	0.0409451	0
2000	1249	100.001	1	1	278.315	-1.2587e+06	39.182	-303.331	2901.67	150.781	-7.767	0	2.55222	0	2.732	0.0409414	0
2000	1248	100.001	1	1	278.216	-1.25885e+06	39.1791	-303.31	2901.53	150.781	-7.778	0	2.55241	0	2.737	0.0409377	0
2000	1247	100.001	1	1	278.117	-1.259e+06	39.1763	-303.289	2901.38	150.781	-7.789	0	2.5526	0	2.741	0.0409341	0
2000	1246	100.001	1	1	278.018	-1.25915e+06	39.1734	-303.267	2901.24	150.781	-7.799	0	2.55279	0	2.746	0.0409304	0
2000	1245	100.001	1	1	277.918	-1.2593e+06	39.1705	-303.246	2901.09	150.781	-7.81	0	2.55297	0	2.751	0.0409268	0
2000	1244	100.001	1	1	277.819	-1.25945e+06	39.1676	-303.225	2900.94	150.781	-7.82	0	2.55316	0	2.755	0.0409231	0
2000	1243	100.001	1	1	277.72	-1.2596e+06	39.1648	-303.204	2900.8	150.781	-7.831	0	2.55335	0	2.76	0.0409195	0
2000	1242	100.001	1	1	277.62	-1.25976e+06	39.1619	-303.183	2900.65	150.781	-7.842	0	2.55354	0	2.765	0.0409159	0
2000	1241	100.001	1	1	277.521	-1.25991e+06	39.159	-303.161	2900.5	150.781	-7.852	0	2.55373	0	2.77	0.0409123	0
2000	1240	100.002	1	1	277.421	-1.26006e+06	39.1562	-303.14	2900.36	150.78	-7.863	0	2.55392	0	2.774	0.0409088	0
2000	1239	100.002	1	1	277.322	-1.26021e+06	39.1533	-303.119	2900.21	150.78	-7.874	0	2.5541	0	2.779	0.0409052	0
2000	1238	100.002	1	1	277.222	-1.26036e+06	39.1504	-303.098	2900.06	150.78	-7.884	0	2.55429	0	2.784	0.0409016	0
2000	1237	100.002	1	1	277.122	-1.26051e+06	39.1475	-303.077	2899.91	150.78	-7.895	0	2.55448	0	2.789	0.0408981	0
2000	1236	100.002	1	1	277.022	-1.26066e+06	39.1447	-303.056	2899.76	150.78	-7.906	0	2.55467	0	2.793	0.0408946	0
2000	1235	100.002	1	1	276.922	-1.26081e+06	39.1418	-303.035	2899.61	150.78	-7.917	0	2.55486	0	2.798	0.0408911	0
2000	1234	100.002	1	1	276.823	-1.26097e+06	39.1389	-303.014	2899.46	150.78	-7.927	0	2.55504	0	2.803	0.0408876	0
2000	1233	100.002	1	1	276.723	-1.26112e+06	39.1361	-302.993	2899.31	150.78	-7.938	0	2.55523	0	2.808	0.0408841	0
2000	1232	100.002	1	1	276.622	-1.26127e+06	39.1332	-302.972	2899.16	150.78	-7.949	0	2.55542	0	2.813	0.0408806	0
2000	1231	100.002	1	1	276.522	-1.26142e+06	39.1303	-302.951	2899.01	150.78	-7.96	0	2.55561	0	2.817	0.0408771	0
2000	1230	100.002	1	1	276.422	-1.26157e+06	39.1274	-302.93	2898.86	150.779	-7.97	0	2.5558	0	2.822	0.0408737	0
2000	1229	100.002	1	1	276.322	-1.26172e+06	39.1246	-302.909	2898.71	150.779	-7.981	0	2.55599	0	2.827	0.0408703	0
2000	1228	100.002	1	1	276.221	-1.26187e+06	39.1217	-302.888	2898.56	150.779	-7.992	0	2.55618	0	2.832	0.0408669	0
2000	1227	100.002	1	1	276.121	-1.26202e+06	39.1188	-302.867	2898.41	150.779	-8.003	0	2.55636	0	2.837	0.0408635	0
2000	1226	100.002	1	1	276.021	-1.26218e+06	39.116	-302.846	2898.26	150.779	-8.014	0	2.55655	0	2.841	0.0408601	0
2000	1225	100.002	1	1	275.92	-1.26233e+06	39.1131	-302.825	2898.1	150.779	-8.025	0	2.55674	0	2.846	0.0408567	0
2000	1224	100.002	1	1	275.819	-1.26248e+06	39.1102	-302.804	2897.95	150.779	-8.036	0	2.55693	0	2.851	0.0408533	0
2000	1223	100.002	1	1	275.719	-1.26263e+06	39.1074	-302.783	2897.8	150.779	-8.047	0	2.55712	0	2.856	0.04085	0
2000	1222	100.002	1	1	275.618	-1.26278e+06	39.1045	-302.762	2897.64	150.779	-8.057	0	2.5573	0	2.861	0.0408467	0
2000	1221	100.002	1	1	275.517	-1.26293e+06	39.1016	-302.742	2897.49	150.779	-8.068	0	2.55749	0	2.866	0.0408433	0
2000	1220	100.002	1	1	275.416	-1.26308e+06	39.0988	-302.721	2897.33	150.779	-8.079	0	2.55768	0	2.871	0.04084	0
2000	1219	100.002	1	1	275.315	-1.26323e+06	39.0959	-302.7	2897.18	150.778	-8.09	0	2.55787	0	2.875	0.0408368	0
2000	1218	100.002	1	1	275.214	-1.26339e+06	39.093	-302.679	2897.02	150.778	-8.101	0	2.55806	0	2.88	0.0408335	0
2000	1217	100.002	1	1	275.113	-1.26354e+06	39.0902	-302.658	2896.87	150.778	-8.112	0	2.55825	0	2.885	0.0408302	0
2000	1216	100.002	1	1	275.012	-1.26369e+06	39.0873	-302.638	2896.71	150.778	-8.123	0	2.55844	0	2.89	0.040827	0
2000	1215	100.002	1	1	274.911	-1.26384e+06	39.0844	-302.617	2896.56	150.778	-8.134	0	2.55862	0	2.895	0.0408238	0
2000	1214	100.002	1	1	274.81	-1.26399e+06	39.0816	-302.596	2896.4	150.778	-8.145	0	2.55881	0	2.9	0.0408206	0
2000	1213	100.002	1	1	274.708	-1.26414e+06	39.0787	-302.575	2896.24	150.778	-8.156	0	2.559	0	2.905	0.0408174	0
2000	1212	100.003	1	1	274.607	-1.26429e+06	39.0759	-302.555	2896.09	150.778	-8.168	0	2.55919	0	2.91	0.0408142	0
2000	1211	100.003	1	1	274.505	-1.26445e+06	39.073	-302.534	2895.93	150.778	-8.179	0	2.55938	0	2.915	0.040811	0
2000	1210	100.003	1	1	274.404	-1.2646e+06	39.0701	-302.514	2895.77	150.778	-8.19	0	2.55957	0	2.92	0.0408079	0
2000	1209	100.003	1	1	274.302	-1.26475e+06	39.0673	-302.493	2895.61	150.778	-8.201	0	2.55976	0	2.925	0.0408047	0
2000	1208	100.003	1	1	274.201	-1.2649e+06	39.0644	-302.472	2895.45	150.778	-8.212	0	2.55994	0	2.93	0.0408016	0
2000	1207	100.003	1	1	274.099	-1.26505e+06	39.0615	-302.452	2895.3	150.778	-8.223	0	2.56013	0	2.935	0.0407985	0
2000	1206	100.003	1	1	274	-1.2652e+06	39.0587	-302.431	2895.14	146.192	-8.234	0	2.56032	0	2.939	0.0407954	0
2000	1205	100.003	1	1	273.901	-1.26535e+06	39.0558	-302.411	2894.98	146.191	-8.245	0	2.56051	0	2.944	0.0407924	0
2000	1204	100.003	1	1	273.802	-1.26549e+06	39.053	-302.39	2894.82	146.19	-8.257	0	2.5607	0	2.949	0.0407893	0
2000	1203	100.003	1	1	273.703	-1.26564e+06	39.0501	-302.37	2894.66	146.189	-8.268	0	2.56089	0	2.954	0.0407863	0
2000	1202	100.003	1	1	273.604	-1.26579e+06	39.0472	-302.349	2894.5	146.188	-8.279	0	2.56108	0	2.959	0.0407832	0
2000	1201	100.003	1	1	273.505	-1.26593e+06	39.0444	-302.329	2894.33	146.186	-8.29	0	2.56126	0	2.964	0.0407802	0
2000	1200	100.003	1	1	273.406	-1.26608e+06	39.0415	-302.308	2894.17	146.185	-8.302	0	2.56145	0	2.969	0.0407772	0
2000	1199	100.003	0.997026	0.997624	273.233	-1.26633e+06	39.0241	-301.895	2890.3	146.082	-8.313	0	2.56105	3.20796	2.981	0.040902	0
2000	1198	99.7063	0.998633	0.998909	272.377	-1.26272e+06	38.9222	-301.624	2884.54	145.656	-8.324	0	2.56097	3.20847	2.988	0.0409572	0
2000	1197	99.571	0.998637	0.998912	271.915	-1.26117e+06	38.8707	-301.393	2880.91	145.436	-8.335	0	2.56089	3.20899	2.996	0.0410123	0
2000	1196	99.4362	0.99864	0.998915	271.455	-1.25963e+06	38.8193	-301.163	2877.29	145.217	-8.347	0	2.56081	3.2095	3.004	0.0410672	0
2000	1195	99.3016	0.986599	0.987851	270.725	-1.25849e+06	38.7402	-298.882	2858.77	144.687	-8.358	0	2.56003	2.82724	3.011	0.0420337	0
2000	1194	97.9726	0.987055	0.98827	267.088	-1.24121e+06	38.2345	-296.165	2829.05	142.689	-8.369	0	2.55926	2.82793	3.019	0.0429854	0
2000	1193	96.706	0.987228	0.988431	263.614	-1.22476e+06	37.7519	-293.529	2800.38	140.779	-8.381	0	2.5585	2.82793	3.026	0.0439438	0
2000	1192	95.4726	0.987396	0.988587	260.231	-1.20874e+06	37.2819	-290.957	2772.46	138.918	-8.392	0	2.55774	2.82793	3.033	0.0449088	0
2000	1191	94.271	0.987561	0.988739	256.934	-1.19314e+06	36.824	-288.449	2745.26	137.107	-8.404	0	2.55699	2.82794	3.041	0.0458804	0
2000	1190	93.1	0.987721	0.988888	253.722	-1.17794e+06	36.3778	-286.001	2718.74	135.341	-8.415	0	2.55624	2.82795	3.048	0.0468583	0
2000	1189	91.9585	0.987877	0.989032	250.589	-1.16312e+06	35.9427	-283.612	2692.89	133.62	-8.426	0	2.55549	2.82796	3.055	0.0478426	0
2000	1188	90.8454	0.988029	0.989173	247.535	-1.14868e+06	35.5184	-281.279	2667.67	131.943	-8.438	0	2.55474	2.82797	3.062	0.0488332	0
2000	1187	89.7597	0.988178	0.989311	244.555	-1.13459e+06	35.1045	-278.999	2643.07	130.307	-8.449	0	2.554	2.82799	3.069	0.0498298	0
2000	1186	88.7002	0.988323	0.989446	241.647	-1.12085e+06	34.7006	-276.772	2619.06	128.711	-8.461	0	2.55326	2.82801	3.076	0.0508325	0
2000	1185	87.6662	0.988465	0.989577	238.809	-1.10744e+06	34.3063	-274.596	2595.62	127.153	-8.472	0	2.55253	2.82803	3.083	0.0518411	0
2000	1184	86.6567	0.988603	0.989705	236.037	-1.09435e+06	33.9213	-272.468	2572.73	125.633	-8.484	0	2.55179	2.82806	3.09	0.0528555	0
2000	1183	85.6708	0.988738	0.98983	233.331	-1.08157e+06	33.5454	-270.387	2550.37	124.148	-8.495	0	2.55106	2.82809	3.097	0.0538757	0
2000	1182	84.7078	0.987463	0.988912	230.646	-1.06915e+06	33.1704	-268.266	2527.32	122.648	-8.507	0	2.54997	2.88761	3.107	0.0549898	0
2000	1181	83.6485	0.987506	0.988972	227.752	-1.05554e+06	32.7693	-266.169	2502.93	121.045	-8.518	0	2.54886	2.89208	3.117	0.0561169	0
2000	1180	82.6061	0.987679	0.989128	224.909	-1.04215e+06	32.3756	-264.122	2479.02	119.473	-8.53	0	2.54776	2.89159	3.127	0.0572493	0
2000	1179	81.5911	0.987848	0.98928	222.14	-1.02911e+06	31.9921	-262.124	2455.73	117.942	-8.542	0	2.54666	2.89109	3.137	0.0583868	0
2000	1178	80.6023	0.988012	0.989428	219.442	-1.01641e+06	31.6185	-260.174	2433.05	116.451	-8.553	0	2.54557	2.8906	3.146	0.0595293	0
2000	1177	79.6388	0.988172	0.989572	216.812	-1.00404e+06	31.2543	-258.27	2410.93	114.998	-8.565	0	2.54449	2.8901	3.156	0.0606768	0
2000	1176	78.6996	0.988328	0.989712	214.249	-991980	30.8992	-256.409	2389.38	113.583	-8.576	0	2.54341	2.8896	3.166	0.0618291	0
2000	1175	77.7837	0.98848	0.989848	211.749	-980225	30.553	-254.592	2368.35	112.203	-8.588	0	2.54235	2.8891	3.175	0.0629862	0
2000	1174	76.8904	0.988628	0.989981	209.309	-968760	30.2151	-252.815	2347.84	110.857	-8.6	0	2.54128	2.88859	3.185	0.064148	0
2000	1173	76.0187	0.988772	0.990111	206.929	-957575	29.8854	-251.078	2327.83	109.544	-8.611	0	2.54023	2.88808	3.194	0.0653143	0
2000	1172	75.168	0.988913	0.990238	204.605	-946660	29.5636	-249.38	2308.29	108.263	-8.623	0	2.53919	2.88757	3.204	0.0664852	0
2000	1171	74.3374	0.989051	0.990361	202.336	-936006	29.2493	-247.718	2289.21	107.013	-8.635	0	2.53815	2.88706	3.213	0.0676605	0
2000	1170	73.5262	0.989185	0.990482	200.12	-925603	28.9423	-246.091	2270.58	105.792	-8.646	0	2.53712	2.88655	3.222	0.0688402	0
2000	1169	72.7338	0.989023	0.99036	197.952	-915444	28.6418	-244.465	2252.06	104.594	-8.658	0	2.536	2.8914	3.232	0.0700535	0
2000	1168	71.9381	0.989079	0.990408	195.78	-905286	28.3412	-242.855	2233.69	103.398	-8.67	0	2.53488	2.88987	3.241	0.0712805	0
2000	1167	71.1552	0.989212	0.990527	193.643	-895290	28.0455	-241.277	2215.7	102.223	-8.682	0	2.53377	2.88936	3.251	0.0725119	0
2000	1166	70.3903	0.989341	0.990643	191.556	-885525	27.7565	-239.732	2198.12	101.076	-8.694	0	2.53267	2.88885	3.26	0.0737477	0
2000	1165	69.6428	0.989468	0.990757	189.515	-875984	27.474	-238.219	2180.93	99.9544	-8.705	0	2.53157	2.88835	3.269	0.0749877	0
2000	1164	68.9121	0.989591	0.990868	187.52	-866658	27.1977	-236.736	2164.13	98.8586	-8.717	0	2.53048	2.88783	3.279	0.076232	0
2000	1163	68.1975	0.989712	0.990976	185.569	-857541	26.9276	-235.284	2147.7	97.7873	-8.729	0	2.5294	2.88732	3.288	0.0774803	0
2000	1162	67.4987	0.98983	0.991082	183.66	-848625	26.6633	-233.86	2131.63	96.7398	-8.741	0	2.52832	2.88681	3.297	0.0787328	0
2000	1161	66.815	0.989945	0.991185	181.792	-839904	26.4047	-232.464	2115.9	95.7153	-8.753	0	2.52725	2.88629	3.306	0.0799892	0
2000	1160	66.146	0.990058	0.991286	179.964	-831371	26.1516	-231.095	2100.5	94.713	-8.765	0	2.52619	2.88577	3.315	0.0812495	0
2000	1159	65.4911	0.990169	0.991385	178.175	-823021	25.9039	-229.753	2085.44	93.7322	-8.777	0	2.52514	2.88525	3.324	0.0825137	0
2000	1158	64.85	0.990276	0.991482	176.423	-814847	25.6612	-228.436	2070.68	92.7722	-8.789	0	2.52409	2.88473	3.333	0.0837817	0
2000	1157	64.2222	0.990382	0.991576	174.707	-806844	25.4236	-227.143	2056.23	91.8324	-8.8	0	2.52305	2.88421	3.342	0.0850534	0
2000	1156	63.6073	0.990485	0.991669	173.026	-799006	25.1908	-225.874	2042.07	90.9121	-8.812	0	2.52201	2.88368	3.351	0.0863288	0
2000	1155	63.0049	0.990587	0.991759	171.378	-791329	24.9627	-224.629	2028.2	90.0108	-8.824	0	2.52098	2.88316	3.36	0.0876079	0
2000	1154	62.4146	0.990686	0.991848	169.764	-783807	24.7391	-223.405	2014.61	89.1278	-8.836	0	2.51996	2.88263	3.368	0.0888905	0
2000	1153	61.8361	0.990783	0.991935	168.181	-776436	24.5199	-222.204	2001.28	88.2625	-8.848	0	2.51894	2.8821	3.377	0.0901766	0
2000	1152	61.2689	0.990877	0.992019	166.63	-769211	24.305	-221.023	1988.21	87.4146	-8.86	0	2.51794	2.88158	3.386	0.0914661	0
2000	1151	60.7128	0.99097	0.992103	165.108	-762128	24.0942	-219.863	1975.4	86.5833	-8.872	0	2.51693	2.88105	3.394	0.0927591	0
2000	1150	60.1674	0.991062	0.992184	163.616	-755183	23.8874	-218.723	1962.83	85.7683	-8.885	0	2.51594	2.88052	3.403	0.0940555	0
2000	1149	59.6324	0.991151	0.992264	162.151	-748371	23.6846	-217.603	1950.5	84.9691	-8.897	0	2.51495	2.87999	3.411	0.0953551	0
2000	1148	59.1075	0.991238	0.992342	160.714	-741689	23.4855	-216.501	1938.4	84.1851	-8.909	0	2.51396	2.87945	3.42	0.0966581	0
2000	1147	58.5924	0.991324	0.992418	159.304	-735132	23.2902	-215.417	1926.52	83.416	-8.921	0	2.51299	2.87892	3.428	0.0979642	0
2000	1146	58.0869	0.991408	0.992493	157.92	-728699	23.0984	-214.351	1914.86	82.6614	-8.933	0	2.51201	2.87839	3.436	0.0992735	0
2000	1145	57.5907	0.99149	0.992567	156.561	-722383	22.91	-213.302	1903.42	81.9208	-8.945	0	2.51105	2.87785	3.445	0.100586	0
2000	1144	57.1034	0.991571	0.992639	155.226	-716184	22.7251	-212.271	1892.18	81.1938	-8.957	0	2.51009	2.87732	3.453	0.101902	0
2000	1143	56.6249	0.991651	0.99271	153.915	-710097	22.5434	-211.255	1881.14	80.4801	-8.969	0	2.50914	2.87679	3.461	0.10322	0
2000	1142	56.155	0.991728	0.992779	152.627	-704119	22.365	-210.255	1870.29	79.7793	-8.982	0	2.50819	2.87625	3.469	0.104542	0
2000	1141	55.6933	0.991804	0.992847	151.362	-698248	22.1896	-209.271	1859.63	79.091	-8.994	0	2.50725	2.87572	3.477	0.105866	0
2000	1140	55.2397	0.991879	0.992914	150.119	-692479	22.0173	-208.302	1849.16	78.4149	-9.006	0	2.50631	2.87518	3.485	0.107194	0
2000	1139	54.7939	0.991953	0.992979	148.897	-686812	21.8479	-207.347	1838.87	77.7507	-9.018	0	2.50538	2.87465	3.493	0.108524	0
2000	1138	54.3558	0.992025	0.993043	147.695	-681242	21.6814	-206.407	1828.75	77.0981	-9.031	0	2.50445	2.87411	3.501	0.109858	0
2000	1137	53.9252	0.992095	0.993106	146.514	-675768	21.5177	-205.481	1818.8	76.4567	-9.043	0	2.50353	2.87358	3.509	0.111194	0
2000	1136	53.5018	0.992165	0.993168	145.353	-670387	21.3567	-204.568	1809.02	75.8263	-9.055	0	2.50262	2.87305	3.517	0.112533	0
2000	1135	53.0854	0.992233	0.993229	144.211	-665096	21.1984	-203.669	1799.39	75.2066	-9.067	0	2.50171	2.87251	3.525	0.113875	0
2000	1134	52.676	0.9923	0.993288	143.087	-659894	21.0426	-202.782	1789.93	74.5973	-9.08	0	2.50081	2.87198	3.532	0.115219	0
2000	1133	52.2732	0.992366	0.993347	141.982	-654777	20.8894	-201.908	1780.62	73.9981	-9.092	0	2.49991	2.87145	3.54	0.116566	0
2000	1132	51.877	0.99243	0.993404	140.894	-649745	20.7386	-201.046	1771.45	73.4088	-9.105	0	2.49902	2.87091	3.548	0.117916	0
2000	1131	51.4872	0.992494	0.993461	139.824	-644794	20.5902	-200.197	1762.44	72.8291	-9.117	0	2.49813	2.87038	3.555	0.119269	0
2000	1130	51.1035	0.992556	0.993516	138.771	-639922	20.4441	-199.358	1753.56	72.2589	-9.129	0	2.49725	2.86985	3.563	0.120624	0
2000	1129	50.726	0.992617	0.993571	137.734	-635128	20.3003	-198.532	1744.82	71.6978	-9.142	0	2.49638	2.86932	3.571	0.121982	0
2000	1128	50.3544	0.992678	0.993624	136.714	-630410	20.1588	-197.716	1736.22	71.1456	-9.154	0	2.49551	2.86879	3.578	0.123342	0
2000	1127	49.9885	0.992737	0.993677	135.709	-625766	20.0194	-196.911	1727.75	70.6022	-9.167	0	2.49464	2.86826	3.586	0.124705	0
2000	1126	49.6283	0.992795	0.993728	134.719	-621194	19.8821	-196.117	1719.41	70.0673	-9.179	0	2.49378	2.86774	3.593	0.12607	0
2000	1125	49.2736	0.992852	0.993779	133.744	-616693	19.7469	-195.334	1711.19	69.5406	-9.192	0	2.49293	2.86721	3.6	0.127438	0
2000	1124	48.9242	0.992908	0.993829	132.784	-612260	19.6137	-194.56	1703.1	69.0222	-9.204	0	2.49208	2.86668	3.608	0.128809	0
2000	1123	48.5801	0.992963	0.993878	131.839	-607895	19.4825	-193.796	1695.13	68.5116	-9.217	0	2.49123	2.86616	3.615	0.130181	0
2000	1122	48.2412	0.993018	0.993926	130.907	-603595	19.3532	-193.042	1687.27	68.0088	-9.229	0	2.49039	2.86564	3.622	0.131557	0
2000	1121	47.9072	0.993071	0.993974	129.989	-599359	19.2258	-192.298	1679.53	67.5135	-9.242	0	2.48956	2.86511	3.629	0.132934	0
2000	1120	47.5781	0.993124	0.994021	129.084	-595186	19.1002	-191.562	1671.89	67.0256	-9.254	0	2.48872	2.8646	3.636	0.134314	0
2000	1119	47.2538	0.993175	0.994066	128.192	-591074	18.9765	-190.836	1664.37	66.5449	-9.267	0	2.4879	2.86408	3.644	0.135697	0
2000	1118	46.9342	0.993226	0.994112	127.313	-587022	18.8544	-190.119	1656.96	66.0713	-9.28	0	2.48708	2.86356	3.651	0.137081	0
2000	1117	46.6192	0.993276	0.994156	126.446	-583028	18.7341	-189.41	1649.64	65.6046	-9.292	0	2.48626	2.86304	3.658	0.138468	0
2000	1116	46.3086	0.993326	0.9942	125.591	-579092	18.6155	-188.709	1642.43	65.1446	-9.305	0	2.48545	2.86253	3.665	0.139858	0
2000	1115	46.0024	0.993374	0.994243	124.749	-575211	18.4985	-188.017	1635.32	64.6912	-9.318	0	2.48464	2.86202	3.671	0.141249	0
2000	1114	45.7005	0.993422	0.994285	123.918	-571385	18.3831	-187.333	1628.31	64.2443	-9.33	0	2.48384	2.86151	3.678	0.142643	0
2000	1113	45.4027	0.993469	0.994327	123.098	-567613	18.2693	-186.657	1621.39	63.8036	-9.343	0	2.48304	2.861	3.685	0.144039	0
2000	1112	45.1091	0.993515	0.994368	122.289	-563893	18.1571	-185.989	1614.57	63.3692	-9.356	0	2.48225	2.86049	3.692	0.145438	0
2000	1111	44.8194	0.99356	0.994408	121.492	-560224	18.0463	-185.328	1607.83	62.9407	-9.368	0	2.48146	2.85998	3.699	0.146838	0
2000	1110	44.5337	0.993605	0.994448	120.705	-556605	17.937	-184.675	1601.19	62.5182	-9.381	0	2.48068	2.85948	3.706	0.148241	0
2000	1109	44.2518	0.993649	0.994487	119.928	-553035	17.8292	-184.029	1594.63	62.1015	-9.394	0	2.47989	2.85898	3.712	0.149646	0
2000	1108	43.9736	0.993693	0.994525	119.162	-549513	17.7228	-183.39	1588.16	61.6904	-9.407	0	2.47912	2.85848	3.719	0.151053	0
2000	1107	43.6992	0.993735	0.994563	118.406	-546038	17.6177	-182.759	1581.77	61.2848	-9.42	0	2.47835	2.85799	3.726	0.152462	0
2000	1106	43.4283	0.993778	0.9946	117.659	-542610	17.514	-182.134	1575.46	60.8847	-9.432	0	2.47758	2.85749	3.732	0.153874	0
2000	1105	43.161	0.993819	0.994637	116.922	-539226	17.4116	-181.516	1569.24	60.4899	-9.445	0	2.47682	2.857	3.739	0.155287	0
2000	1104	42.8971	0.99386	0.994673	116.195	-535887	17.3106	-180.904	1563.09	60.1003	-9.458	0	2.47606	2.85651	3.745	0.156703	0
2000	1103	42.6366	0.9939	0.994709	115.477	-532590	17.2108	-180.299	1557.02	59.7158	-9.471	0	2.4753	2.85602	3.752	0.15812	0
2000	1102	42.3794	0.99394	0.994744	114.768	-529337	17.1122	-179.7	1551.02	59.3363	-9.484	0	2.47455	2.85554	3.758	0.15954	0
2000	1101	42.1255	0.993979	0.994779	114.067	-526125	17.0149	-179.108	1545.1	58.9617	-9.497	0	2.47381	2.85506	3.764	0.160962	0
2000	1100	41.8747	0.994017	0.994813	113.376	-522953	16.9188	-178.521	1539.25	58.5919	-9.51	0	2.47306	2.85458	3.771	0.162386	0
2000	1099	41.6271	0.994055	0.994847	112.693	-519821	16.8238	-177.941	1533.48	58.2268	-9.523	0	2.47233	2.8541	3.777	0.163811	0
2000	1098	41.3826	0.994093	0.99488	112.018	-516729	16.7301	-177.366	1527.77	57.8663	-9.536	0	2.47159	2.85363	3.783	0.165239	0
2000	1097	41.141	0.99413	0.994912	111.351	-513675	16.6374	-176.797	1522.13	57.5104	-9.549	0	2.47086	2.85316	3.79	0.166669	0
2000	1096	40.9024	0.994166	0.994944	110.693	-510659	16.5458	-176.234	1516.55	57.1588	-9.562	0	2.47013	2.85269	3.796	0.168101	0
2000	1095	40.6667	0.994202	0.994976	110.042	-507679	16.4554	-175.676	1511.05	56.8116	-9.575	0	2.46941	2.85223	3.802	0.169535	0
2000	1094	40.4338	0.994237	0.995007	109.399	-504736	16.366	-175.124	1505.6	56.4687	-9.588	0	2.46869	2.85176	3.808	0.17097	0
2000	1093	40.2037	0.994272	0.995038	108.764	-501828	16.2776	-174.577	1500.22	56.13	-9.601	0	2.46798	2.85131	3.814	0.172408	0
2000	1092	39.9763	0.994306	0.995069	108.136	-498955	16.1903	-174.035	1494.9	55.7953	-9.614	0	2.46726	2.85085	3.82	0.173848	0
2000	1091	39.7516	0.99434	0.995099	107.515	-496116	16.104	-173.499	1489.64	55.4647	-9.627	0	2.46656	2.8504	3.826	0.175289	0
2000	1090	39.5296	0.994374	0.995128	106.902	-493311	16.0186	-172.967	1484.45	55.138	-9.64	0	2.46585	2.84995	3.832	0.176733	0
2000	1089	39.3101	0.994407	0.995157	106.295	-490539	15.9343	-172.441	1479.31	54.8152	-9.654	0	2.46515	2.8495	3.838	0.178178	0
2000	1088	39.0931	0.994439	0.995186	105.696	-487799	15.8509	-171.919	1474.22	54.4963	-9.667	0	2.46445	2.84906	3.844	0.179625	0
2000	1087	38.8786	0.994471	0.995215	105.103	-485091	15.7684	-171.402	1469.2	54.181	-9.68	0	2.46376	2.84862	3.85	0.181075	0
2000	1086	38.6666	0.994503	0.995243	104.517	-482414	15.6869	-170.89	1464.23	53.8694	-9.693	0	2.46307	2.84819	3.856	0.182526	0
2000	1085	38.4569	0.994534	0.99527	103.938	-479768	15.6062	-170.383	1459.31	53.5614	-9.706	0	2.46238	2.84776	3.862	0.183978	0
2000	1084	38.2497	0.994565	0.995297	103.365	-477151	15.5265	-169.88	1454.45	53.257	-9.72	0	2.4617	2.84733	3.867	0.185433	0
2000	1083	38.0447	0.994595	0.995324	102.798	-474565	15.4476	-169.381	1449.64	52.956	-9.733	0	2.46102	2.84691	3.873	0.18689	0
2000	1082	37.842	0.994625	0.995351	102.237	-472007	15.3695	-168.887	1444.88	52.6585	-9.746	0	2.46034	2.84648	3.879	0.188348	0
2000	1081	37.6415	0.994655	0.995377	101.683	-469477	15.2924	-168.397	1440.17	52.3643	-9.76	0	2.45967	2.84607	3.885	0.189808	0
2000	1080	37.4432	0.994684	0.995403	101.134	-466976	15.216	-167.912	1435.51	52.0733	-9.773	0	2.459	2.84565	3.89	0.19127	0
2000	1079	37.2471	0.994713	0.995428	100.592	-464502	15.1404	-167.431	1430.89	51.7856	-9.786	0	2.45833	2.84525	3.896	0.192734	0
2000	1078	37.0531	0.994741	0.995454	100.055	-462056	15.0657	-166.953	1426.33	51.5011	-9.8	0	2.45767	2.84484	3.901	0.1942	0
2000	1077	36.8611	0.994769	0.995478	99.5237	-459635	14.9917	-166.48	1421.82	51.2197	-9.813	0	2.45701	2.84444	3.907	0.195667	0
2000	1076	36.6712	0.994797	0.995503	98.9982	-457241	14.9185	-166.011	1417.34	50.9414	-9.827	0	2.45635	2.84404	3.912	0.197136	0
2000	1075	36.4833	0.994824	0.995527	98.4781	-454873	14.8461	-165.546	1412.92	50.6661	-9.84	0	2.4557	2.84365	3.918	0.198607	0
2000	1074	36.2974	0.994851	0.995551	97.9634	-452529	14.7744	-165.084	1408.54	50.3938	-9.853	0	2.45505	2.84326	3.923	0.20008	0
2000	1073	36.1135	0.994878	0.995575	97.4541	-450211	14.7034	-164.627	1404.2	50.1244	-9.867	0	2.4544	2.84288	3.929	0.201554	0
2000	1072	35.9314	0.994904	0.995598	96.9499	-447917	14.6332	-164.173	1399.91	49.8578	-9.88	0	2.45376	2.8425	3.934	0.20303	0
2000	1071	35.7512	0.99493	0.995621	96.4509	-445647	14.5637	-163.722	1395.66	49.5941	-9.894	0	2.45312	2.84213	3.939	0.204508	0
2000	1070	35.5729	0.994956	0.995644	95.957	-443401	14.4948	-163.276	1391.45	49.3331	-9.907	0	2.45248	2.84176	3.945	0.205988	0
2000	1069	35.3964	0.994981	0.995666	95.468	-441177	14.4267	-162.832	1387.28	49.0748	-9.921	0	2.45184	2.84139	3.95	0.207469	0
2000	1068	35.2216	0.995006	0.995688	94.9839	-438977	14.3592	-162.393	1383.15	48.8193	-9.935	0	2.45121	2.84103	3.955	0.208952	0
2000	1067	35.0487	0.995031	0.99571	94.5046	-436799	14.2924	-161.957	1379.07	48.5664	-9.948	0	2.45058	2.84067	3.961	0.210436	0
2000	1066	34.8774	0.995055	0.995732	94.0301	-434643	14.2263	-161.524	1375.02	48.316	-9.962	0	2.44996	2.84032	3.966	0.211923	0
2000	1065	34.7079	0.995079	0.995753	93.5602	-432509	14.1608	-161.094	1371.01	48.0682	-9.975	0	2.44933	2.83997	3.971	0.213411	0
2000	1064	34.54	0.99509	0.995767	93.0948	-430396	14.0959	-160.668	1367.02	47.8228	-9.989	0	2.4487	2.84179	3.976	0.214904	0
2000	1063	34.3737	0.995096	0.995777	92.6335	-428303	14.0316	-160.244	1363.06	47.5795	-10.003	0	2.44806	2.84509	3.981	0.216402	0
2000	1062	34.2089	0.995104	0.99579	92.1764	-426230	13.9678	-159.823	1359.13	47.3385	-10.016	0	2.44743	2.8483	3.987	0.217901	0
2000	1061	34.0453	0.995121	0.995807	91.723	-424174	13.9046	-159.406	1355.24	47.0996	-10.03	0	2.4468	2.84941	3.992	0.219402	0
2000	1060	33.8831	0.995143	0.995827	91.2735	-422138	13.842	-158.992	1351.38	46.8629	-10.044	0	2.44617	2.84919	3.997	0.220905	0
2000	1059	33.7225	0.995165	0.995847	90.8283	-420122	13.7799	-158.58	1347.56	46.6286	-10.058	0	2.44554	2.84897	4.002	0.22241	0
2000	1058	33.5634	0.995187	0.995867	90.3873	-418125	13.7185	-158.172	1343.77	46.3965	-10.071	0	2.44492	2.84876	4.007	0.223916	0
2000	1057	33.4058	0.995209	0.995886	89.9504	-416147	13.6576	-157.767	1340.01	46.1667	-10.085	0	2.44429	2.84856	4.012	0.225424	0
2000	1056	33.2497	0.99523	0.995905	89.5176	-414188	13.5972	-157.364	1336.29	45.9391	-10.099	0	2.44367	2.84836	4.017	0.226933	0
2000	1055	33.0951	0.995251	0.995924	89.0887	-412248	13.5374	-156.965	1332.6	45.7137	-10.113	0	2.44306	2.84817	4.022	0.228445	0
2000	1054	32.9419	0.995272	0.995943	88.6638	-410326	13.4782	-156.568	1328.94	45.4904	-10.127	0	2.44244	2.848	4.027	0.229958	0
2000	1053	32.7901	0.995293	0.995961	88.2428	-408423	13.4195	-156.174	1325.32	45.2692	-10.141	0	2.44183	2.84782	4.032	0.231472	0
2000	1052	32.6396	0.995313	0.995979	87.8256	-406537	13.3613	-155.783	1321.73	45.0502	-10.155	0	2.44122	2.84766	4.037	0.232989	0
2000	1051	32.4906	0.995333	0.995997	87.4122	-404669	13.3036	-155.395	1318.16	44.8332	-10.169	0	2.44061	2.8475	4.042	0.234506	0
2000	1050	32.3429	0.995353	0.996015	87.0024	-402818	13.2465	-155.009	1314.63	44.6182	-10.183	0	2.44	2.84736	4.047	0.236026	0
2000	1049	32.1966	0.995372	0.996033	86.5963	-400984	13.1898	-154.626	1311.13	44.4052	-10.196	0	2.4394	2.84722	4.051	0.237547	0
2000	1048	32.0515	0.995392	0.99605	86.1938	-399167	13.1337	-154.246	1307.65	44.1941	-10.21	0	2.4388	2.84709	4.056	0.23907	0
2000	1047	31.9078	0.995411	0.996067	85.7949	-397366	13.078	-153.868	1304.21	43.985	-10.224	0	2.4382	2.84697	4.061	0.240595	0
2000	1046	31.7653	0.99543	0.996084	85.3994	-395582	13.0228	-153.492	1300.79	43.7778	-10.239	0	2.4376	2.84686	4.066	0.242121	0
2000	1045	31.6241	0.995448	0.996101	85.0074	-393813	12.9681	-153.12	1297.4	43.5725	-10.253	0	2.437	2.84675	4.071	0.243649	0
2000	1044	31.4841	0.995466	0.996117	84.6187	-392061	12.9139	-152.749	1294.04	43.369	-10.267	0	2.43641	2.84666	4.075	0.245178	0
2000	1043	31.3453	0.995485	0.996134	84.2334	-390324	12.8601	-152.381	1290.7	43.1674	-10.281	0	2.43581	2.84658	4.08	0.246709	0
2000	1042	31.2077	0.995502	0.99615	83.8514	-388602	12.8068	-152.016	1287.4	42.9675	-10.295	0	2.43522	2.84651	4.085	0.248242	0
2000	1041	31.0713	0.99552	0.996166	83.4726	-386896	12.7539	-151.653	1284.12	42.7694	-10.309	0	2.43463	2.84645	4.089	0.249777	0
2000	1040	30.9361	0.995537	0.996181	83.097	-385204	12.7015	-151.292	1280.86	42.573	-10.323	0	2.43404	2.84639	4.094	0.251313	0
2000	1039	30.802	0.995555	0.996197	82.7246	-383527	12.6495	-150.933	1277.63	42.3784	-10.337	0	2.43346	2.84635	4.098	0.25285	0
2000	1038	30.669	0.995572	0.996212	82.3552	-381865	12.598	-150.577	1274.42	42.1854	-10.352	0	2.43287	2.84633	4.103	0.25439	0
2000	1037	30.5371	0.995588	0.996228	81.9889	-380217	12.5468	-150.223	1271.24	41.9941	-10.366	0	2.43229	2.84631	4.108	0.255931	0
2000	1036	30.4064	0.995605	0.996243	81.6257	-378583	12.4961	-149.871	1268.09	41.8044	-10.38	0	2.43171	2.8463	4.112	0.257473	0
2000	1035	30.2767	0.995621	0.996257	81.2654	-376963	12.4458	-149.522	1264.95	41.6164	-10.394	0	2.43113	2.84631	4.117	0.259017	0
2000	1034	30.1481	0.995637	0.996272	80.908	-375356	12.3959	-149.174	1261.84	41.4299	-10.409	0	2.43055	2.84633	4.121	0.260563	0
2000	1033	30.0205	0.995653	0.996287	80.5535	-373763	12.3464	-148.829	1258.76	41.245	-10.423	0	2.42997	2.84636	4.125	0.262111	0
2000	1032	29.894	0.995669	0.996301	80.2018	-372184	12.2973	-148.486	1255.69	41.0617	-10.437	0	2.42939	2.84641	4.13	0.26366	0
2000	1031	29.7684	0.995684	0.996315	79.853	-370617	12.2486	-148.144	1252.65	40.8799	-10.452	0	2.42882	2.84646	4.134	0.265211	0
2000	1030	29.6439	0.995699	0.996329	79.5069	-369064	12.2002	-147.805	1249.63	40.6995	-10.466	0	2.42824	2.84654	4.139	0.266764	0
2000	1029	29.5204	0.995714	0.996343	79.1636	-367523	12.1523	-147.468	1246.64	40.5207	-10.48	0	2.42767	2.84662	4.143	0.268318	0
2000	1028	29.3978	0.995729	0.996356	78.8229	-365995	12.1047	-147.133	1243.66	40.3433	-10.495	0	2.4271	2.84672	4.147	0.269874	0
2000	1027	29.2763	0.995743	0.99637	78.4849	-364479	12.0575	-146.8	1240.71	40.1674	-10.509	0	2.42653	2.84684	4.152	0.271431	0
2000	1026	29.1556	0.995758	0.996383	78.1495	-362975	12.0106	-146.469	1237.77	39.9928	-10.524	0	2.42596	2.84697	4.156	0.27299	0
2000	1025	29.0359	0.995772	0.996396	77.8166	-361484	11.9642	-146.139	1234.86	39.8197	-10.538	0	2.42539	2.84712	4.16	0.274551	0
2000	1024	28.9171	0.995786	0.996409	77.4863	-360004	11.918	-145.812	1231.96	39.6479	-10.553	0	2.42482	2.84728	4.165	0.276114	0
2000	1023	28.7992	0.995799	0.996421	77.1585	-358536	11.8722	-145.486	1229.11	39.4782	-10.567	0	2.42425	2.84746	4.169	0.277678	0
2000	1022	28.6822	0.995813	0.996434	76.8332	-357080	11.8268	-145.163	1226.25	39.3091	-10.582	0	2.42368	2.84765	4.173	0.279244	0
2000	1021	28.5661	0.995826	0.996446	76.5102	-355635	11.7817	-144.841	1223.42	39.1413	-10.596	0	2.42311	2.84785	4.177	0.280812	0
2000	1020	28.4508	0.995839	0.996458	76.1897	-354201	11.7369	-144.521	1220.6	38.9749	-10.611	0	2.42255	2.84808	4.181	0.282381	0
2000	1019	28.3364	0.995852	0.99647	75.8715	-352778	11.6924	-144.202	1217.8	38.8097	-10.626	0	2.42198	2.84832	4.186	0.283953	0
2000	1018	28.2228	0.995864	0.996482	75.5557	-351367	11.6483	-143.886	1215.02	38.6457	-10.64	0	2.42141	2.84858	4.19	0.285526	0
2000	1017	28.1101	0.995877	0.996494	75.2421	-349966	11.6045	-143.571	1212.25	38.483	-10.655	0	2.42085	2.84885	4.194	0.287101	0
2000	1016	27.9981	0.995889	0.996505	74.9308	-348575	11.561	-143.258	1209.51	38.3215	-10.67	0	2.42028	2.84915	4.198	0.288678	0
2000	1015	27.887	0.995901	0.996517	74.6217	-347195	11.5178	-142.946	1206.78	38.1613	-10.684	0	2.41971	2.84946	4.202	0.290256	0
2000	1014	27.7767	0.995912	0.996528	74.3147	-345826	11.4749	-142.636	1204.06	38.0022	-10.699	0	2.41915	2.84979	4.206	0.291836	0
2000	1013	27.6671	0.995924	0.996539	74.01	-344467	11.4323	-142.328	1201.37	37.8442	-10.714	0	2.41858	2.85015	4.21	0.293419	0
2000	1012	27.5583	0.995935	0.99655	73.7074	-343117	11.3901	-142.021	1198.69	37.6874	-10.729	0	2.41801	2.85052	4.214	0.295003	0
2000	1011	27.4503	0.995946	0.99656	73.4068	-341778	11.3481	-141.716	1196.02	37.5318	-10.744	0	2.41744	2.85091	4.218	0.296588	0
2000	1010	27.343	0.995957	0.996571	73.1084	-340448	11.3064	-141.413	1193.37	37.3773	-10.758	0	2.41688	2.85133	4.222	0.298176	0
2000	1009	27.2364	0.995967	0.996581	72.812	-339128	11.265	-141.111	1190.74	37.2238	-10.773	0	2.41631	2.85176	4.226	0.299766	0
2000	1008	27.1305	0.995978	0.996591	72.5175	-337818	11.2238	-140.811	1188.12	37.0715	-10.788	0	2.41574	2.85222	4.23	0.301357	0
2000	1007	27.0254	0.995988	0.996601	72.2251	-336517	11.183	-140.512	1185.52	36.9202	-10.803	0	2.41517	2.85269	4.234	0.302951	0
2000	1006	26.921	0.995998	0.996611	71.9346	-335225	11.1424	-140.215	1182.93	36.77	-10.818	0	2.4146	2.85319	4.238	0.304546	0
2000	1005	26.8172	0.996008	0.996621	71.646	-333943	11.1021	-139.919	1180.35	36.6208	-10.833	0	2.41403	2.85372	4.242	0.306144	0
2000	1004	26.7142	0.996017	0.99663	71.3593	-332669	11.0621	-139.624	1177.79	36.4726	-10.848	0	2.41345	2.85427	4.246	0.307743	0
2000	1003	26.6118	0.996027	0.99664	71.0745	-331404	11.0223	-139.331	1175.25	36.3254	-10.863	0	2.41288	2.85485	4.25	0.309344	0
2000	1002	26.51	0.996036	0.996649	70.7915	-330148	10.9828	-139.04	1172.71	36.1792	-10.878	0	2.4123	2.85546	4.254	0.310947	0
2000	1001	26.4089	0.996044	0.996658	70.5104	-328901	10.9435	-138.75	1170.19	36.034	-10.893	0	2.41172	2.8561	4.258	0.312553	0
2000	1000	26.3085	0.996053	0.996667	70.2309	-327662	10.9045	-138.461	1167.68	35.8897	-10.908	0	2.41114	2.85679	4.262	0.31416	0
2000	999	26.2086	0.996061	0.996675	69.9533	-326432	10.8657	-138.173	1165.19	35.7464	-10.923	0	2.41056	2.85751	4.266	0.315769	0
2000	998	26.1094	0.996069	0.996683	69.6773	-325210	10.8272	-137.887	1162.7	35.604	-10.938	0	2.40998	2.8583	4.27	0.317381	0
2000	997	26.0107	0.996076	0.996691	69.403	-323996	10.7889	-137.603	1160.23	35.4625	-10.953	0	2.40939	2.85915	4.274	0.318995	0
2000	996	25.9127	0.996083	0.996699	69.1304	-322790	10.7508	-137.319	1157.76	35.3219	-10.968	0	2.4088	2.8601	4.278	0.320611	0
2000	995	25.8152	0.996089	0.996706	68.8593	-321591	10.713	-137.037	1155.31	35.1821	-10.984	0	2.40821	2.8612	4.281	0.32223	0
2000	994	25.7182	0.996093	0.996712	68.5897	-320401	10.6754	-136.756	1152.87	35.0432	-10.999	0	2.40761	2.86254	4.285	0.323852	0
2000	993	25.6218	0.996095	0.996717	68.3216	-319217	10.638	-136.476	1150.43	34.9049	-11.014	0	2.40701	2.86429	4.289	0.325476	0
2000	992	25.5258	0.996093	0.996718	68.0547	-318041	10.6008	-136.197	1147.99	34.7674	-11.029	0	2.40639	2.86695	4.293	0.327106	0
2000	991	25.4301	0.996077	0.996712	67.7887	-316870	10.5638	-135.919	1145.55	34.6302	-11.045	0	2.40575	2.87213	4.297	0.328743	0
2000	990	25.3342	0.996287	0.996846	67.5245	-315699	10.5268	-135.646	1143.27	34.4949	-11.06	0	2.4053	2.83317	4.3	0.330333	0
2000	989	25.2435	0.995487	0.996346	67.2644	-314585	10.4913	-135.359	1140.36	34.3581	-11.075	0	2.40407	2.97214	4.307	0.332134	0
2000	988	25.134	0.995412	0.996309	66.9651	-313326	10.4509	-135.068	1137.27	34.2025	-11.091	0	2.40279	2.98988	4.314	0.333948	0
2000	987	25.0231	0.995434	0.996328	66.6637	-312061	10.4103	-134.779	1134.19	34.046	-11.106	0	2.40153	2.98909	4.321	0.335762	0
2000	986	24.9133	0.995456	0.996347	66.3651	-310809	10.3701	-134.492	1131.15	33.8911	-11.121	0	2.40027	2.98831	4.328	0.337576	0
2000	985	24.8045	0.995478	0.996366	66.0692	-309569	10.3303	-134.206	1128.13	33.7377	-11.137	0	2.39901	2.98754	4.334	0.339388	0
2000	984	24.6968	0.9955	0.996384	65.7761	-308340	10.2908	-133.923	1125.13	33.5857	-11.152	0	2.39777	2.98678	4.341	0.3412	0
2000	983	24.5901	0.995521	0.996402	65.4857	-307123	10.2516	-133.641	1122.17	33.4352	-11.168	0	2.39653	2.98604	4.348	0.343012	0
2000	982	24.4843	0.995542	0.99642	65.198	-305917	10.2129	-133.361	1119.23	33.2862	-11.183	0	2.39529	2.9853	4.355	0.344822	0
2000	981	24.3796	0.995563	0.996438	64.9129	-304722	10.1744	-133.083	1116.32	33.1385	-11.199	0	2.39406	2.98457	4.361	0.346632	0
2000	980	24.2758	0.995584	0.996455	64.6303	-303538	10.1363	-132.807	1113.44	32.9923	-11.214	0	2.39284	2.98386	4.368	0.348441	0
2000	979	24.173	0.995604	0.996473	64.3504	-302365	10.0985	-132.533	1110.58	32.8474	-11.23	0	2.39162	2.98315	4.374	0.35025	0
2000	978	24.0711	0.995624	0.99649	64.0729	-301202	10.0611	-132.261	1107.74	32.7038	-11.246	0	2.39041	2.98245	4.381	0.352058	0
2000	977	23.9702	0.995644	0.996507	63.7979	-300050	10.024	-131.99	1104.93	32.5616	-11.261	0	2.38921	2.98177	4.387	0.353865	0
2000	976	23.8702	0.995664	0.996524	63.5253	-298909	9.98721	-131.721	1102.15	32.4207	-11.277	0	2.38801	2.98109	4.393	0.355671	0
2000	975	23.7711	0.995683	0.99654	63.2551	-297777	9.95073	-131.454	1099.39	32.281	-11.293	0	2.38682	2.98042	4.4	0.357476	0
2000	974	23.6728	0.995703	0.996557	62.9873	-296656	9.91457	-131.188	1096.65	32.1427	-11.308	0	2.38564	2.97976	4.406	0.359281	0
2000	973	23.5755	0.995722	0.996573	62.7218	-295545	9.87871	-130.924	1093.93	32.0056	-11.324	0	2.38446	2.97911	4.412	0.361085	0
2000	972	23.479	0.995741	0.996589	62.4586	-294443	9.84316	-130.662	1091.24	31.8697	-11.34	0	2.38328	2.97847	4.418	0.362889	0
2000	971	23.3834	0.995759	0.996605	62.1977	-293351	9.80791	-130.401	1088.57	31.7351	-11.355	0	2.38211	2.97784	4.424	0.364691	0
2000	970	23.2886	0.995778	0.996621	61.939	-292269	9.77295	-130.142	1085.93	31.6016	-11.371	0	2.38095	2.97722	4.43	0.366493	0
2000	969	23.1946	0.995796	0.996636	61.6826	-291196	9.73829	-129.884	1083.3	31.4693	-11.387	0	2.37979	2.97661	4.436	0.368294	0
2000	968	23.1015	0.995814	0.996652	61.4283	-290132	9.70391	-129.629	1080.7	31.3382	-11.403	0	2.37864	2.97601	4.442	0.370094	0
2000	967	23.0092	0.995832	0.996667	61.1762	-289077	9.66981	-129.374	1078.12	31.2083	-11.419	0	2.37749	2.97541	4.448	0.371893	0
2000	966	22.9176	0.99585	0.996682	60.9261	-288032	9.636	-129.121	1075.56	31.0795	-11.435	0	2.37635	2.97483	4.454	0.373692	0
2000	965	22.8269	0.995868	0.996697	60.6782	-286995	9.60246	-128.87	1073.02	30.9518	-11.451	0	2.37521	2.97425	4.46	0.37549	0
2000	964	22.7369	0.995885	0.996712	60.4324	-285967	9.56919	-128.62	1070.5	30.8252	-11.467	0	2.37408	2.97368	4.465	0.377287	0
2000	963	22.6477	0.995902	0.996727	60.1885	-284948	9.53619	-128.372	1068	30.6997	-11.483	0	2.37296	2.97312	4.471	0.379083	0
2000	962	22.5593	0.995919	0.996741	59.9467	-283937	9.50346	-128.125	1065.52	30.5752	-11.499	0	2.37184	2.97257	4.477	0.380878	0
2000	961	22.4716	0.995936	0.996756	59.7069	-282935	9.47099	-127.879	1063.07	30.4519	-11.515	0	2.37072	2.97203	4.482	0.382672	0
2000	960	22.3846	0.995953	0.99677	59.469	-281941	9.43878	-127.635	1060.63	30.3295	-11.531	0	2.36961	2.9715	4.488	0.384466	0
2000	959	22.2984	0.99597	0.996784	59.233	-280955	9.40683	-127.393	1058.2	30.2083	-11.547	0	2.36851	2.97097	4.494	0.386258	0
2000	958	22.2128	0.995986	0.996798	58.999	-279978	9.37512	-127.151	1055.8	30.088	-11.563	0	2.36741	2.97045	4.499	0.38805	0
2000	957	22.128	0.996002	0.996812	58.7668	-279008	9.34367	-126.911	1053.42	29.9687	-11.579	0	2.36631	2.96995	4.505	0.389841	0
2000	956	22.0439	0.996018	0.996826	58.5365	-278046	9.31246	-126.673	1051.05	29.8504	-11.595	0	2.36522	2.96944	4.51	0.391631	0
2000	955	21.9605	0.996034	0.99684	58.3081	-277093	9.2815	-126.436	1048.71	29.7332	-11.611	0	2.36414	2.96895	4.515	0.39342	0
2000	954	21.8777	0.99605	0.996853	58.0814	-276146	9.25077	-126.2	1046.38	29.6168	-11.628	0	2.36306	2.96847	4.521	0.395208	0
2000	953	21.7956	0.996066	0.996867	57.8566	-275208	9.22029	-125.965	1044.06	29.5015	-11.644	0	2.36198	2.96799	4.526	0.396996	0
2000	952	21.7142	0.996081	0.99688	57.6335	-274277	9.19003	-125.732	1041.77	29.387	-11.66	0	2.36091	2.96752	4.531	0.398782	0
2000	951	21.6335	0.996097	0.996893	57.4121	-273354	9.16001	-125.5	1039.49	29.2735	-11.676	0	2.35984	2.96706	4.536	0.400567	0
2000	950	21.5533	0.996112	0.996906	57.1925	-272438	9.13022	-125.269	1037.23	29.161	-11.693	0	2.35878	2.9666	4.542	0.402352	0
2000	949	21.4739	0.996127	0.996919	56.9746	-271529	9.10065	-125.04	1034.98	29.0493	-11.709	0	2.35772	2.96616	4.547	0.404135	0
2000	948	21.395	0.996142	0.996932	56.7584	-270627	9.07131	-124.811	1032.76	28.9385	-11.725	0	2.35667	2.96572	4.552	0.405918	0
2000	947	21.3168	0.996157	0.996945	56.5438	-269733	9.04218	-124.584	1030.54	28.8287	-11.742	0	2.35562	2.96529	4.557	0.407699	0
2000	946	21.2392	0.996172	0.996957	56.3309	-268845	9.01328	-124.358	1028.35	28.7196	-11.758	0	2.35458	2.96487	4.562	0.40948	0
2000	945	21.1622	0.996186	0.99697	56.1196	-267964	8.98459	-124.134	1026.17	28.6115	-11.775	0	2.35354	2.96445	4.567	0.411259	0
2000	944	21.0858	0.996201	0.996982	55.9099	-267091	8.95612	-123.91	1024	28.5042	-11.791	0	2.35251	2.96404	4.572	0.413038	0
2000	943	21.0101	0.996215	0.996995	55.7018	-266224	8.92785	-123.688	1021.85	28.3978	-11.808	0	2.35148	2.96364	4.577	0.414815	0
2000	942	20.9348	0.996229	0.997007	55.4952	-265363	8.89979	-123.467	1019.72	28.2922	-11.824	0	2.35045	2.96324	4.581	0.416592	0
2000	941	20.8602	0.996244	0.997019	55.2902	-264510	8.87194	-123.247	1017.6	28.1874	-11.841	0	2.34943	2.96286	4.586	0.418367	0
2000	940	20.7862	0.996258	0.997031	55.0868	-263662	8.8443	-123.028	1015.49	28.0834	-11.857	0	2.34841	2.96248	4.591	0.420142	0
2000	939	20.7127	0.996272	0.997043	54.8848	-262822	8.81685	-122.811	1013.4	27.9802	-11.874	0	2.3474	2.9621	4.596	0.421915	0
2000	938	20.6398	0.996285	0.997055	54.6844	-261987	8.7896	-122.594	1011.33	27.8779	-11.891	0	2.34639	2.96174	4.6	0.423687	0
2000	937	20.5674	0.996299	0.997067	54.4854	-261159	8.76255	-122.379	1009.27	27.7763	-11.907	0	2.34539	2.96138	4.605	0.425458	0
2000	936	20.4956	0.996313	0.997078	54.2879	-260338	8.7357	-122.164	1007.22	27.6755	-11.924	0	2.34439	2.96102	4.61	0.427228	0
2000	935	20.4243	0.996326	0.99709	54.0918	-259522	8.70903	-121.951	1005.19	27.5754	-11.941	0	2.34339	2.96068	4.614	0.428997	0
2000	934	20.3536	0.996339	0.997101	53.8972	-258713	8.68256	-121.739	1003.17	27.4762	-11.958	0	2.3424	2.96034	4.619	0.430765	0
2000	933	20.2834	0.996353	0.997113	53.704	-257909	8.65628	-121.528	1001.16	27.3776	-11.974	0	2.34141	2.96001	4.623	0.432532	0
2000	932	20.2137	0.996366	0.997124	53.5121	-257112	8.63018	-121.318	999.165	27.2798	-11.991	0	2.34043	2.95968	4.628	0.434297	0
2000	931	20.1445	0.996379	0.997135	53.3217	-256320	8.60426	-121.109	997.185	27.1828	-12.008	0	2.33945	2.95936	4.632	0.436062	0
2000	930	20.0759	0.996392	0.997146	53.1326	-255535	8.57853	-120.901	995.219	27.0865	-12.025	0	2.33847	2.95905	4.636	0.437825	0
2000	929	20.0077	0.996405	0.997158	52.9449	-254755	8.55298	-120.694	993.264	26.9908	-12.042	0	2.3375	2.95874	4.641	0.439587	0
2000	928	19.9401	0.996418	0.997169	52.7585	-253981	8.52761	-120.488	991.323	26.8959	-12.059	0	2.33654	2.95844	4.645	0.441348	0
2000	927	19.8729	0.99643	0.997179	52.5734	-253212	8.50242	-120.283	989.394	26.8017	-12.076	0	2.33557	2.95815	4.649	0.443108	0
2000	926	19.8063	0.996443	0.99719	52.3897	-252449	8.4774	-120.079	987.478	26.7082	-12.093	0	2.33461	2.95786	4.653	0.444866	0
2000	925	19.7401	0.996455	0.997201	52.2072	-251692	8.45255	-119.876	985.574	26.6154	-12.11	0	2.33366	2.95758	4.658	0.446623	0
2000	924	19.6744	0.996468	0.997212	52.0261	-250940	8.42787	-119.674	983.682	26.5233	-12.127	0	2.33271	2.9573	4.662	0.44838	0
2000	923	19.6092	0.99648	0.997222	51.8462	-250194	8.40337	-119.473	981.802	26.4318	-12.144	0	2.33176	2.95703	4.666	0.450134	0
2000	922	19.5445	0.996492	0.997233	51.6675	-249453	8.37903	-119.273	979.934	26.341	-12.161	0	2.33081	2.95677	4.67	0.451888	0
2000	921	19.4802	0.996505	0.997243	51.4901	-248717	8.35485	-119.073	978.077	26.2509	-12.178	0	2.32987	2.95651	4.674	0.45364	0
2000	920	19.4164	0.996517	0.997254	51.3139	-247986	8.33085	-118.875	976.232	26.1614	-12.195	0	2.32894	2.95626	4.678	0.455391	0
2000	919	19.353	0.996529	0.997264	51.139	-247261	8.307	-118.678	974.399	26.0725	-12.212	0	2.32801	2.95601	4.682	0.457141	0
2000	918	19.2901	0.996541	0.997274	50.9652	-246541	8.28332	-118.482	972.577	25.9843	-12.23	0	2.32708	2.95577	4.686	0.458889	0
2000	917	19.2276	0.996552	0.997285	50.7926	-245826	8.25979	-118.286	970.766	25.8968	-12.247	0	2.32615	2.95554	4.69	0.460637	0
2000	916	19.1656	0.996564	0.997295	50.6212	-245116	8.23642	-118.092	968.966	25.8098	-12.264	0	2.32523	2.95531	4.694	0.462382	0
2000	915	19.104	0.996576	0.997305	50.451	-244411	8.21321	-117.898	967.177	25.7235	-12.281	0	2.32431	2.95508	4.698	0.464127	0
2000	914	19.0429	0.996587	0.997315	50.282	-243711	8.19016	-117.705	965.399	25.6377	-12.299	0	2.3234	2.95486	4.701	0.46587	0
2000	913	18.9822	0.996599	0.997325	50.114	-243016	8.16726	-117.513	963.632	25.5526	-12.316	0	2.32249	2.95465	4.705	0.467612	0
2000	912	18.9219	0.99661	0.997335	49.9473	-242326	8.14451	-117.322	961.875	25.4681	-12.333	0	2.32158	2.95444	4.709	0.469352	0
2000	911	18.862	0.996622	0.997344	49.7816	-241640	8.12191	-117.132	960.129	25.3841	-12.351	0	2.32068	2.95424	4.713	0.471091	0
2000	910	18.8025	0.996633	0.997354	49.617	-240960	8.09946	-116.943	958.392	25.3008	-12.368	0	2.31978	2.95404	4.716	0.472829	0
2000	909	18.7435	0.996644	0.997364	49.4536	-240284	8.07715	-116.754	956.667	25.218	-12.386	0	2.31888	2.95385	4.72	0.474565	0
2000	908	18.6849	0.996656	0.997373	49.2912	-239612	8.055	-116.567	954.951	25.1359	-12.403	0	2.31799	2.95366	4.723	0.4763	0
2000	907	18.6266	0.996667	0.997383	49.1299	-238946	8.03298	-116.38	953.245	25.0542	-12.421	0	2.3171	2.95348	4.727	0.478033	0
2000	906	18.5688	0.996678	0.997393	48.9697	-238284	8.01112	-116.194	951.549	24.9732	-12.438	0	2.31622	2.9533	4.73	0.479765	0
2000	905	18.5114	0.996689	0.997402	48.8105	-237626	7.98939	-116.009	949.863	24.8927	-12.456	0	2.31534	2.95313	4.734	0.481496	0
2000	904	18.4543	0.9967	0.997411	48.6524	-236973	7.96781	-115.825	948.187	24.8127	-12.474	0	2.31446	2.95296	4.737	0.483225	0
2000	903	18.3977	0.996711	0.997421	48.4953	-236325	7.94636	-115.641	946.52	24.7334	-12.491	0	2.31358	2.95279	4.741	0.484952	0
2000	902	18.3414	0.996721	0.99743	48.3393	-235681	7.92505	-115.459	944.863	24.6545	-12.509	0	2.31271	2.95263	4.744	0.486678	0
2000	901	18.2855	0.996732	0.997439	48.1843	-235041	7.90388	-115.277	943.215	24.5762	-12.527	0	2.31185	2.95248	4.748	0.488403	0
2000	900	18.23	0.996743	0.997449	48.0302	-234405	7.88285	-115.096	941.577	24.4984	-12.544	0	2.31098	2.95233	4.751	0.490126	0
Title:	R-magma	-	mresidual	from	MZ-magma	at	T	=	1145	C
Liquid	Composition:
Pressure	Temperature	mass	SiO2	TiO2	Al2O3	Fe2O3	Cr2O3	FeO	MnO	MgO	CaO	Na2O	K2O	H2O
2000	1400	99.9982	55.6022	0.144979	17.3911	0.930859	0.0064125	5.23713	0.0970126	6.81336	9.55121	3.51007	0.108547	0.607118
2000	1400	99.9982	55.6022	0.144979	17.3911	0.930859	0.0064125	5.23713	0.0970126	6.81336	9.55121	3.51007	0.108547	0.607118
2000	1399	99.9982	55.6022	0.144979	17.3911	0.930966	0.0064125	5.23703	0.0970126	6.81336	9.55121	3.51006	0.108547	0.607118
2000	1398	99.9982	55.6022	0.144979	17.3911	0.931075	0.0064125	5.23693	0.0970126	6.81336	9.5512	3.51006	0.108547	0.607118
2000	1397	99.9982	55.6022	0.144979	17.3911	0.931185	0.0064125	5.23683	0.0970125	6.81336	9.5512	3.51006	0.108547	0.607118
2000	1396	99.9982	55.6022	0.144979	17.3911	0.931296	0.0064125	5.23673	0.0970125	6.81336	9.5512	3.51006	0.108547	0.607118
2000	1395	99.9982	55.6022	0.144979	17.3911	0.931408	0.00641249	5.23663	0.0970125	6.81335	9.5512	3.51006	0.108547	0.607118
2000	1394	99.9982	55.6022	0.144979	17.3911	0.931521	0.00641249	5.23653	0.0970125	6.81335	9.5512	3.51006	0.108547	0.607118
2000	1393	99.9982	55.6022	0.144979	17.3911	0.931636	0.00641249	5.23643	0.0970125	6.81335	9.5512	3.51006	0.108547	0.607118
2000	1392	99.9983	55.6022	0.144979	17.3911	0.931751	0.00641249	5.23632	0.0970125	6.81335	9.5512	3.51006	0.108547	0.607118
2000	1391	99.9983	55.6022	0.144979	17.3911	0.931868	0.00641249	5.23622	0.0970125	6.81335	9.5512	3.51006	0.108547	0.607118
2000	1390	99.9983	55.6022	0.144979	17.3911	0.931986	0.00641249	5.23611	0.0970125	6.81335	9.5512	3.51006	0.108547	0.607118
2000	1389	99.9983	55.6022	0.144979	17.3911	0.932104	0.00641249	5.236	0.0970125	6.81335	9.55119	3.51006	0.108547	0.607118
2000	1388	99.9983	55.6022	0.144979	17.3911	0.932224	0.00641249	5.23589	0.0970124	6.81335	9.55119	3.51006	0.108547	0.607118
2000	1387	99.9983	55.6022	0.144979	17.391	0.932346	0.00641249	5.23578	0.0970124	6.81335	9.55119	3.51006	0.108547	0.607118
2000	1386	99.9983	55.6021	0.144979	17.391	0.932468	0.00641249	5.23567	0.0970124	6.81335	9.55119	3.51006	0.108547	0.607118
2000	1385	99.9983	55.6021	0.144979	17.391	0.932591	0.00641249	5.23556	0.0970124	6.81335	9.55119	3.51006	0.108547	0.607117
2000	1384	99.9983	55.6021	0.144979	17.391	0.932716	0.00641249	5.23545	0.0970124	6.81335	9.55119	3.51006	0.108547	0.607117
2000	1383	99.9984	55.6021	0.144979	17.391	0.932842	0.00641249	5.23533	0.0970124	6.81334	9.55119	3.51006	0.108547	0.607117
2000	1382	99.9984	55.6021	0.144979	17.391	0.932968	0.00641248	5.23522	0.0970124	6.81334	9.55119	3.51006	0.108547	0.607117
2000	1381	99.9984	55.6021	0.144979	17.391	0.933096	0.00641248	5.2351	0.0970124	6.81334	9.55118	3.51006	0.108547	0.607117
2000	1380	99.9984	55.6021	0.144979	17.391	0.933226	0.00641248	5.23499	0.0970123	6.81334	9.55118	3.51006	0.108547	0.607117
2000	1379	99.9984	55.6021	0.144979	17.391	0.933356	0.00641248	5.23487	0.0970123	6.81334	9.55118	3.51006	0.108547	0.607117
2000	1378	99.9984	55.6021	0.144979	17.391	0.933487	0.00641248	5.23475	0.0970123	6.81334	9.55118	3.51006	0.108547	0.607117
2000	1377	99.9984	55.6021	0.144979	17.391	0.93362	0.00641248	5.23463	0.0970123	6.81334	9.55118	3.51006	0.108547	0.607117
2000	1376	99.9985	55.6021	0.144979	17.391	0.933754	0.00641248	5.23451	0.0970123	6.81334	9.55118	3.51006	0.108547	0.607117
2000	1375	99.9985	55.6021	0.144979	17.391	0.933889	0.00641248	5.23438	0.0970123	6.81334	9.55118	3.51005	0.108547	0.607117
2000	1374	99.9985	55.6021	0.144979	17.391	0.934025	0.00641248	5.23426	0.0970123	6.81334	9.55118	3.51005	0.108547	0.607117
2000	1373	99.9985	55.6021	0.144979	17.391	0.934163	0.00641248	5.23414	0.0970123	6.81334	9.55117	3.51005	0.108547	0.607116
2000	1372	99.9985	55.602	0.144979	17.391	0.934301	0.00641248	5.23401	0.0970122	6.81333	9.55117	3.51005	0.108547	0.607116
2000	1371	99.9985	55.602	0.144979	17.391	0.934441	0.00641248	5.23388	0.0970122	6.81333	9.55117	3.51005	0.108547	0.607116
2000	1370	99.9985	55.602	0.144979	17.391	0.934582	0.00641247	5.23376	0.0970122	6.81333	9.55117	3.51005	0.108547	0.607116
2000	1369	99.9985	55.602	0.144979	17.391	0.934724	0.00641247	5.23363	0.0970122	6.81333	9.55117	3.51005	0.108547	0.607116
2000	1368	99.9986	55.602	0.144979	17.391	0.934867	0.00641247	5.2335	0.0970122	6.81333	9.55117	3.51005	0.108547	0.607116
2000	1367	99.9986	55.602	0.144979	17.391	0.935012	0.00641247	5.23337	0.0970122	6.81333	9.55117	3.51005	0.108547	0.607116
2000	1366	99.9986	55.602	0.144979	17.391	0.935157	0.00641247	5.23324	0.0970122	6.81333	9.55117	3.51005	0.108547	0.607116
2000	1365	99.9986	55.602	0.144979	17.391	0.935304	0.00641247	5.2331	0.0970121	6.81333	9.55116	3.51005	0.108547	0.607116
2000	1364	99.9986	55.602	0.144979	17.391	0.935453	0.00641247	5.23297	0.0970121	6.81333	9.55116	3.51005	0.108547	0.607116
2000	1363	99.9986	55.602	0.144979	17.391	0.935602	0.00641247	5.23283	0.0970121	6.81333	9.55116	3.51005	0.108547	0.607116
2000	1362	99.9987	55.602	0.144979	17.391	0.935752	0.00641247	5.2327	0.0970121	6.81332	9.55116	3.51005	0.108547	0.607116
2000	1361	99.9987	55.602	0.144979	17.391	0.935904	0.00641247	5.23256	0.0970121	6.81332	9.55116	3.51005	0.108546	0.607115
2000	1360	99.9987	55.6019	0.144979	17.391	0.936057	0.00641246	5.23242	0.0970121	6.81332	9.55116	3.51005	0.108546	0.607115
2000	1359	99.9987	55.6019	0.144979	17.391	0.936211	0.00641246	5.23228	0.0970121	6.81332	9.55115	3.51005	0.108546	0.607115
2000	1358	99.9987	55.6019	0.144978	17.391	0.936367	0.00641246	5.23214	0.097012	6.81332	9.55115	3.51005	0.108546	0.607115
2000	1357	99.9987	55.6019	0.144978	17.391	0.936524	0.00641246	5.232	0.097012	6.81332	9.55115	3.51005	0.108546	0.607115
2000	1356	99.9987	55.6019	0.144978	17.391	0.936682	0.00641246	5.23185	0.097012	6.81332	9.55115	3.51004	0.108546	0.607115
2000	1355	99.9988	55.6019	0.144978	17.391	0.936841	0.00641246	5.23171	0.097012	6.81332	9.55115	3.51004	0.108546	0.607115
2000	1354	99.9988	55.6019	0.144978	17.391	0.937001	0.00641246	5.23157	0.097012	6.81332	9.55115	3.51004	0.108546	0.607115
2000	1353	99.9988	55.6019	0.144978	17.391	0.937163	0.00641246	5.23142	0.097012	6.81332	9.55115	3.51004	0.108546	0.607115
2000	1352	99.9988	55.6019	0.144978	17.391	0.937326	0.00641246	5.23127	0.097012	6.81331	9.55114	3.51004	0.108546	0.607115
2000	1351	99.9988	55.6019	0.144978	17.391	0.93749	0.00641246	5.23112	0.0970119	6.81331	9.55114	3.51004	0.108546	0.607114
2000	1350	99.9988	55.6019	0.144978	17.391	0.937655	0.00641245	5.23097	0.0970119	6.81331	9.55114	3.51004	0.108546	0.607114
2000	1349	99.9989	55.6018	0.144978	17.391	0.937822	0.00641245	5.23082	0.0970119	6.81331	9.55114	3.51004	0.108546	0.607114
2000	1348	99.9989	55.6018	0.144978	17.391	0.93799	0.00641245	5.23067	0.0970119	6.81331	9.55114	3.51004	0.108546	0.607114
2000	1347	99.9989	55.6018	0.144978	17.3909	0.938159	0.00641245	5.23052	0.0970119	6.81331	9.55114	3.51004	0.108546	0.607114
2000	1346	99.9989	55.6018	0.144978	17.3909	0.938329	0.00641245	5.23036	0.0970119	6.81331	9.55113	3.51004	0.108546	0.607114
2000	1345	99.9989	55.6018	0.144978	17.3909	0.938501	0.00641245	5.23021	0.0970118	6.81331	9.55113	3.51004	0.108546	0.607114
2000	1344	99.9989	55.6018	0.144978	17.3909	0.938674	0.00641245	5.23005	0.0970118	6.8133	9.55113	3.51004	0.108546	0.607114
2000	1343	99.999	55.6018	0.144978	17.3909	0.938848	0.00641245	5.22989	0.0970118	6.8133	9.55113	3.51004	0.108546	0.607114
2000	1342	99.999	55.6018	0.144978	17.3909	0.939024	0.00641245	5.22973	0.0970118	6.8133	9.55113	3.51004	0.108546	0.607114
2000	1341	99.999	55.6018	0.144978	17.3909	0.939201	0.00641244	5.22957	0.0970118	6.8133	9.55113	3.51004	0.108546	0.607113
2000	1340	99.999	55.6018	0.144978	17.3909	0.939379	0.00641244	5.22941	0.0970118	6.8133	9.55112	3.51004	0.108546	0.607113
2000	1339	99.999	55.6018	0.144978	17.3909	0.939559	0.00641244	5.22925	0.0970117	6.8133	9.55112	3.51003	0.108546	0.607113
2000	1338	99.9991	55.6017	0.144978	17.3909	0.939739	0.00641244	5.22908	0.0970117	6.8133	9.55112	3.51003	0.108546	0.607113
2000	1337	99.9991	55.6017	0.144978	17.3909	0.939921	0.00641244	5.22892	0.0970117	6.8133	9.55112	3.51003	0.108546	0.607113
2000	1336	99.9991	55.6017	0.144978	17.3909	0.940105	0.00641244	5.22875	0.0970117	6.81329	9.55112	3.51003	0.108546	0.607113
2000	1335	99.9991	55.6017	0.144978	17.3909	0.940289	0.00641244	5.22859	0.0970117	6.81329	9.55112	3.51003	0.108546	0.607113
2000	1334	99.9991	55.6017	0.144978	17.3909	0.940475	0.00641244	5.22842	0.0970116	6.81329	9.55111	3.51003	0.108546	0.607113
2000	1333	99.9991	55.6017	0.144978	17.3909	0.940663	0.00641244	5.22825	0.0970116	6.81329	9.55111	3.51003	0.108546	0.607113
2000	1332	99.9992	55.6017	0.144978	17.3909	0.940851	0.00641243	5.22808	0.0970116	6.81329	9.55111	3.51003	0.108546	0.607112
2000	1331	99.9992	55.6017	0.144978	17.3909	0.941041	0.00641243	5.22791	0.0970116	6.81329	9.55111	3.51003	0.108546	0.607112
2000	1330	99.9992	55.6017	0.144978	17.3909	0.941232	0.00641243	5.22773	0.0970116	6.81329	9.55111	3.51003	0.108546	0.607112
2000	1329	99.9992	55.6016	0.144978	17.3909	0.941425	0.00641243	5.22756	0.0970116	6.81329	9.55111	3.51003	0.108546	0.607112
2000	1328	99.9992	55.6016	0.144978	17.3909	0.941619	0.00641243	5.22738	0.0970115	6.81328	9.5511	3.51003	0.108546	0.607112
2000	1327	99.9993	55.6016	0.144978	17.3909	0.941814	0.00641243	5.22721	0.0970115	6.81328	9.5511	3.51003	0.108546	0.607112
2000	1326	99.9993	55.6016	0.144978	17.3909	0.942011	0.00641243	5.22703	0.0970115	6.81328	9.5511	3.51003	0.108546	0.607112
2000	1325	99.9993	55.6016	0.144978	17.3909	0.942209	0.00641243	5.22685	0.0970115	6.81328	9.5511	3.51003	0.108546	0.607112
2000	1324	99.9993	55.6016	0.144978	17.3909	0.942408	0.00641242	5.22667	0.0970115	6.81328	9.5511	3.51002	0.108546	0.607111
2000	1323	99.9993	55.6016	0.144978	17.3909	0.942609	0.00641242	5.22649	0.0970114	6.81328	9.55109	3.51002	0.108546	0.607111
2000	1322	99.9994	55.6016	0.144978	17.3909	0.942811	0.00641242	5.2263	0.0970114	6.81328	9.55109	3.51002	0.108546	0.607111
2000	1321	99.9994	55.6016	0.144978	17.3909	0.943014	0.00641242	5.22612	0.0970114	6.81328	9.55109	3.51002	0.108546	0.607111
2000	1320	99.9994	55.6015	0.144977	17.3909	0.943219	0.00641242	5.22593	0.0970114	6.81327	9.55109	3.51002	0.108546	0.607111
2000	1319	99.9994	55.6015	0.144977	17.3909	0.943425	0.00641242	5.22575	0.0970114	6.81327	9.55109	3.51002	0.108546	0.607111
2000	1318	99.9994	55.6015	0.144977	17.3909	0.943633	0.00641242	5.22556	0.0970113	6.81327	9.55108	3.51002	0.108546	0.607111
2000	1317	99.9995	55.6015	0.144977	17.3908	0.943841	0.00641241	5.22537	0.0970113	6.81327	9.55108	3.51002	0.108546	0.607111
2000	1316	99.9995	55.6015	0.144977	17.3908	0.944052	0.00641241	5.22518	0.0970113	6.81327	9.55108	3.51002	0.108546	0.60711
2000	1315	99.9995	55.6015	0.144977	17.3908	0.944263	0.00641241	5.22499	0.0970113	6.81327	9.55108	3.51002	0.108546	0.60711
2000	1314	99.9995	55.6015	0.144977	17.3908	0.944476	0.00641241	5.22479	0.0970113	6.81327	9.55108	3.51002	0.108546	0.60711
2000	1313	99.9995	55.6015	0.144977	17.3908	0.944691	0.00641241	5.2246	0.0970112	6.81326	9.55107	3.51002	0.108546	0.60711
2000	1312	99.9996	55.6015	0.144977	17.3908	0.944907	0.00641241	5.2244	0.0970112	6.81326	9.55107	3.51002	0.108546	0.60711
2000	1311	99.9996	55.6014	0.144977	17.3908	0.945124	0.00641241	5.22421	0.0970112	6.81326	9.55107	3.51002	0.108545	0.60711
2000	1310	99.9996	55.6014	0.144977	17.3908	0.945342	0.00641241	5.22401	0.0970112	6.81326	9.55107	3.51001	0.108545	0.60711
2000	1309	99.9996	55.6014	0.144977	17.3908	0.945563	0.0064124	5.22381	0.0970111	6.81326	9.55107	3.51001	0.108545	0.60711
2000	1308	99.9997	55.6014	0.144977	17.3908	0.945784	0.0064124	5.22361	0.0970111	6.81326	9.55106	3.51001	0.108545	0.607109
2000	1307	99.9997	55.6014	0.144977	17.3908	0.946007	0.0064124	5.22341	0.0970111	6.81325	9.55106	3.51001	0.108545	0.607109
2000	1306	99.9997	55.6014	0.144977	17.3908	0.946231	0.0064124	5.2232	0.0970111	6.81325	9.55106	3.51001	0.108545	0.607109
2000	1305	99.9997	55.6014	0.144977	17.3908	0.946457	0.0064124	5.223	0.0970111	6.81325	9.55106	3.51001	0.108545	0.607109
2000	1304	99.9998	55.6014	0.144977	17.3908	0.946684	0.0064124	5.22279	0.097011	6.81325	9.55105	3.51001	0.108545	0.607109
2000	1303	99.9998	55.6013	0.144977	17.3908	0.946913	0.0064124	5.22259	0.097011	6.81325	9.55105	3.51001	0.108545	0.607109
2000	1302	99.9998	55.6013	0.144977	17.3908	0.947143	0.00641239	5.22238	0.097011	6.81325	9.55105	3.51001	0.108545	0.607109
2000	1301	99.9998	55.6013	0.144977	17.3908	0.947374	0.00641239	5.22217	0.097011	6.81325	9.55105	3.51001	0.108545	0.607108
2000	1300	99.9998	55.6013	0.144977	17.3908	0.947607	0.00641239	5.22196	0.097011	6.81324	9.55105	3.51001	0.108545	0.607108
2000	1299	99.9999	55.6013	0.144977	17.3908	0.947841	0.00641239	5.22175	0.0970109	6.81324	9.55104	3.51001	0.108545	0.607108
2000	1298	99.9999	55.6013	0.144977	17.3908	0.948077	0.00641239	5.22153	0.0970109	6.81324	9.55104	3.51	0.108545	0.607108
2000	1297	99.9999	55.6013	0.144977	17.3908	0.948314	0.00641239	5.22132	0.0970109	6.81324	9.55104	3.51	0.108545	0.607108
2000	1296	99.9999	55.6013	0.144977	17.3908	0.948553	0.00641238	5.2211	0.0970109	6.81324	9.55104	3.51	0.108545	0.607108
2000	1295	100	55.6012	0.144977	17.3908	0.948793	0.00641238	5.22088	0.0970108	6.81324	9.55103	3.51	0.108545	0.607108
2000	1294	100	55.6012	0.144977	17.3908	0.949035	0.00641238	5.22066	0.0970108	6.81323	9.55103	3.51	0.108545	0.607107
2000	1293	100	55.6012	0.144977	17.3908	0.949278	0.00641238	5.22044	0.0970108	6.81323	9.55103	3.51	0.108545	0.607107
2000	1292	100	55.6012	0.144977	17.3907	0.949523	0.00641238	5.22022	0.0970108	6.81323	9.55103	3.51	0.108545	0.607107
2000	1291	100	55.6012	0.144977	17.3907	0.949769	0.00641238	5.22	0.0970107	6.81323	9.55103	3.51	0.108545	0.607107
2000	1290	100	55.6012	0.144976	17.3907	0.950017	0.00641238	5.21977	0.0970107	6.81323	9.55102	3.51	0.108545	0.607107
2000	1289	100	55.6012	0.144976	17.3907	0.950266	0.00641237	5.21955	0.0970107	6.81323	9.55102	3.51	0.108545	0.607107
2000	1288	100	55.6011	0.144976	17.3907	0.950516	0.00641237	5.21932	0.0970107	6.81322	9.55102	3.51	0.108545	0.607107
2000	1287	100	55.6011	0.144976	17.3907	0.950768	0.00641237	5.21909	0.0970106	6.81322	9.55102	3.51	0.108545	0.607106
2000	1286	100	55.6011	0.144976	17.3907	0.951022	0.00641237	5.21886	0.0970106	6.81322	9.55101	3.50999	0.108545	0.607106
2000	1285	100	55.6011	0.144976	17.3907	0.951277	0.00641237	5.21863	0.0970106	6.81322	9.55101	3.50999	0.108545	0.607106
2000	1284	100	55.6011	0.144976	17.3907	0.951534	0.00641237	5.2184	0.0970106	6.81322	9.55101	3.50999	0.108545	0.607106
2000	1283	100	55.6011	0.144976	17.3907	0.951792	0.00641236	5.21817	0.0970105	6.81322	9.55101	3.50999	0.108545	0.607106
2000	1282	100	55.6011	0.144976	17.3907	0.952052	0.00641236	5.21793	0.0970105	6.81321	9.551	3.50999	0.108545	0.607106
2000	1281	100	55.601	0.144976	17.3907	0.952313	0.00641236	5.21769	0.0970105	6.81321	9.551	3.50999	0.108545	0.607105
2000	1280	100	55.601	0.144976	17.3907	0.952576	0.00641236	5.21746	0.0970105	6.81321	9.551	3.50999	0.108545	0.607105
2000	1279	100	55.601	0.144976	17.3907	0.95284	0.00641236	5.21722	0.0970104	6.81321	9.551	3.50999	0.108545	0.607105
2000	1278	100	55.601	0.144976	17.3907	0.953106	0.00641236	5.21698	0.0970104	6.81321	9.55099	3.50999	0.108545	0.607105
2000	1277	100	55.601	0.144976	17.3907	0.953373	0.00641235	5.21673	0.0970104	6.8132	9.55099	3.50999	0.108545	0.607105
2000	1276	100	55.601	0.144976	17.3907	0.953642	0.00641235	5.21649	0.0970104	6.8132	9.55099	3.50999	0.108545	0.607105
2000	1275	100	55.601	0.144976	17.3907	0.953913	0.00641235	5.21624	0.0970103	6.8132	9.55099	3.50998	0.108545	0.607104
2000	1274	100.001	55.6009	0.144976	17.3907	0.954185	0.00641235	5.216	0.0970103	6.8132	9.55098	3.50998	0.108545	0.607104
2000	1273	100.001	55.6009	0.144976	17.3907	0.954459	0.00641235	5.21575	0.0970103	6.8132	9.55098	3.50998	0.108544	0.607104
2000	1272	100.001	55.6009	0.144976	17.3907	0.954734	0.00641234	5.2155	0.0970103	6.8132	9.55098	3.50998	0.108544	0.607104
2000	1271	100.001	55.6009	0.144976	17.3907	0.955011	0.00641234	5.21525	0.0970102	6.81319	9.55097	3.50998	0.108544	0.607104
2000	1270	100.001	55.6009	0.144976	17.3906	0.955289	0.00641234	5.215	0.0970102	6.81319	9.55097	3.50998	0.108544	0.607104
2000	1269	100.001	55.6009	0.144976	17.3906	0.955569	0.00641234	5.21474	0.0970102	6.81319	9.55097	3.50998	0.108544	0.607103
2000	1268	100.001	55.6008	0.144976	17.3906	0.955851	0.00641234	5.21449	0.0970101	6.81319	9.55097	3.50998	0.108544	0.607103
2000	1267	100.001	55.6008	0.144976	17.3906	0.956134	0.00641234	5.21423	0.0970101	6.81319	9.55096	3.50998	0.108544	0.607103
2000	1266	100.001	55.6008	0.144976	17.3906	0.956418	0.00641233	5.21398	0.0970101	6.81318	9.55096	3.50998	0.108544	0.607103
2000	1265	100.001	55.6008	0.144976	17.3906	0.956705	0.00641233	5.21372	0.0970101	6.81318	9.55096	3.50997	0.108544	0.607103
2000	1264	100.001	55.6008	0.144975	17.3906	0.956993	0.00641233	5.21345	0.09701	6.81318	9.55096	3.50997	0.108544	0.607103
2000	1263	100.001	55.6008	0.144975	17.3906	0.957282	0.00641233	5.21319	0.09701	6.81318	9.55095	3.50997	0.108544	0.607102
2000	1262	100.001	55.6007	0.144975	17.3906	0.957574	0.00641233	5.21293	0.09701	6.81318	9.55095	3.50997	0.108544	0.607102
2000	1261	100.001	55.6007	0.144975	17.3906	0.957866	0.00641232	5.21266	0.09701	6.81317	9.55095	3.50997	0.108544	0.607102
2000	1260	100.001	55.6007	0.144975	17.3906	0.958161	0.00641232	5.2124	0.0970099	6.81317	9.55094	3.50997	0.108544	0.607102
2000	1259	100.001	55.6007	0.144975	17.3906	0.958457	0.00641232	5.21213	0.0970099	6.81317	9.55094	3.50997	0.108544	0.607102
2000	1258	100.001	55.6007	0.144975	17.3906	0.958755	0.00641232	5.21186	0.0970099	6.81317	9.55094	3.50997	0.108544	0.607102
2000	1257	100.001	55.6007	0.144975	17.3906	0.959054	0.00641232	5.21159	0.0970098	6.81317	9.55094	3.50997	0.108544	0.607101
2000	1256	100.001	55.6006	0.144975	17.3906	0.959355	0.00641232	5.21131	0.0970098	6.81316	9.55093	3.50996	0.108544	0.607101
2000	1255	100.001	55.6006	0.144975	17.3906	0.959658	0.00641231	5.21104	0.0970098	6.81316	9.55093	3.50996	0.108544	0.607101
2000	1254	100.001	55.6006	0.144975	17.3906	0.959962	0.00641231	5.21076	0.0970097	6.81316	9.55093	3.50996	0.108544	0.607101
2000	1253	100.001	55.6006	0.144975	17.3906	0.960268	0.00641231	5.21049	0.0970097	6.81316	9.55092	3.50996	0.108544	0.607101
2000	1252	100.001	55.6006	0.144975	17.3906	0.960576	0.00641231	5.21021	0.0970097	6.81316	9.55092	3.50996	0.108544	0.6071
2000	1251	100.001	55.6006	0.144975	17.3906	0.960885	0.00641231	5.20993	0.0970097	6.81315	9.55092	3.50996	0.108544	0.6071
2000	1250	100.001	55.6005	0.144975	17.3905	0.961197	0.0064123	5.20965	0.0970096	6.81315	9.55092	3.50996	0.108544	0.6071
2000	1249	100.001	55.6005	0.144975	17.3905	0.961509	0.0064123	5.20936	0.0970096	6.81315	9.55091	3.50996	0.108544	0.6071
2000	1248	100.001	55.6005	0.144975	17.3905	0.961824	0.0064123	5.20908	0.0970096	6.81315	9.55091	3.50996	0.108544	0.6071
2000	1247	100.001	55.6005	0.144975	17.3905	0.96214	0.0064123	5.20879	0.0970095	6.81314	9.55091	3.50996	0.108544	0.607099
2000	1246	100.001	55.6005	0.144975	17.3905	0.962458	0.0064123	5.2085	0.0970095	6.81314	9.5509	3.50995	0.108544	0.607099
2000	1245	100.001	55.6005	0.144975	17.3905	0.962777	0.00641229	5.20821	0.0970095	6.81314	9.5509	3.50995	0.108544	0.607099
2000	1244	100.001	55.6004	0.144975	17.3905	0.963099	0.00641229	5.20792	0.0970094	6.81314	9.5509	3.50995	0.108544	0.607099
2000	1243	100.001	55.6004	0.144975	17.3905	0.963422	0.00641229	5.20763	0.0970094	6.81314	9.55089	3.50995	0.108543	0.607099
2000	1242	100.001	55.6004	0.144975	17.3905	0.963746	0.00641229	5.20734	0.0970094	6.81313	9.55089	3.50995	0.108543	0.607098
2000	1241	100.001	55.6004	0.144974	17.3905	0.964073	0.00641228	5.20704	0.0970093	6.81313	9.55089	3.50995	0.108543	0.607098
2000	1240	100.002	55.6004	0.144974	17.3905	0.964401	0.00641228	5.20674	0.0970093	6.81313	9.55088	3.50995	0.108543	0.607098
2000	1239	100.002	55.6003	0.144974	17.3905	0.964731	0.00641228	5.20644	0.0970093	6.81313	9.55088	3.50995	0.108543	0.607098
2000	1238	100.002	55.6003	0.144974	17.3905	0.965063	0.00641228	5.20614	0.0970093	6.81312	9.55088	3.50994	0.108543	0.607098
2000	1237	100.002	55.6003	0.144974	17.3905	0.965396	0.00641228	5.20584	0.0970092	6.81312	9.55088	3.50994	0.108543	0.607097
2000	1236	100.002	55.6003	0.144974	17.3905	0.965731	0.00641227	5.20554	0.0970092	6.81312	9.55087	3.50994	0.108543	0.607097
2000	1235	100.002	55.6003	0.144974	17.3905	0.966068	0.00641227	5.20523	0.0970092	6.81312	9.55087	3.50994	0.108543	0.607097
2000	1234	100.002	55.6003	0.144974	17.3905	0.966407	0.00641227	5.20493	0.0970091	6.81312	9.55087	3.50994	0.108543	0.607097
2000	1233	100.002	55.6002	0.144974	17.3904	0.966747	0.00641227	5.20462	0.0970091	6.81311	9.55086	3.50994	0.108543	0.607097
2000	1232	100.002	55.6002	0.144974	17.3904	0.96709	0.00641227	5.20431	0.0970091	6.81311	9.55086	3.50994	0.108543	0.607096
2000	1231	100.002	55.6002	0.144974	17.3904	0.967434	0.00641226	5.204	0.097009	6.81311	9.55086	3.50994	0.108543	0.607096
2000	1230	100.002	55.6002	0.144974	17.3904	0.96778	0.00641226	5.20368	0.097009	6.81311	9.55085	3.50994	0.108543	0.607096
2000	1229	100.002	55.6002	0.144974	17.3904	0.968127	0.00641226	5.20337	0.097009	6.8131	9.55085	3.50993	0.108543	0.607096
2000	1228	100.002	55.6001	0.144974	17.3904	0.968477	0.00641226	5.20305	0.0970089	6.8131	9.55085	3.50993	0.108543	0.607096
2000	1227	100.002	55.6001	0.144974	17.3904	0.968828	0.00641225	5.20273	0.0970089	6.8131	9.55084	3.50993	0.108543	0.607095
2000	1226	100.002	55.6001	0.144974	17.3904	0.969181	0.00641225	5.20241	0.0970089	6.8131	9.55084	3.50993	0.108543	0.607095
2000	1225	100.002	55.6001	0.144974	17.3904	0.969536	0.00641225	5.20209	0.0970088	6.81309	9.55084	3.50993	0.108543	0.607095
2000	1224	100.002	55.6001	0.144974	17.3904	0.969893	0.00641225	5.20177	0.0970088	6.81309	9.55083	3.50993	0.108543	0.607095
2000	1223	100.002	55.6	0.144974	17.3904	0.970251	0.00641224	5.20144	0.0970087	6.81309	9.55083	3.50993	0.108543	0.607095
2000	1222	100.002	55.6	0.144974	17.3904	0.970612	0.00641224	5.20112	0.0970087	6.81309	9.55083	3.50993	0.108543	0.607094
2000	1221	100.002	55.6	0.144973	17.3904	0.970974	0.00641224	5.20079	0.0970087	6.81308	9.55082	3.50992	0.108543	0.607094
2000	1220	100.002	55.6	0.144973	17.3904	0.971338	0.00641224	5.20046	0.0970086	6.81308	9.55082	3.50992	0.108543	0.607094
2000	1219	100.002	55.6	0.144973	17.3904	0.971704	0.00641224	5.20013	0.0970086	6.81308	9.55082	3.50992	0.108543	0.607094
2000	1218	100.002	55.5999	0.144973	17.3904	0.972072	0.00641223	5.19979	0.0970086	6.81308	9.55081	3.50992	0.108543	0.607093
2000	1217	100.002	55.5999	0.144973	17.3903	0.972441	0.00641223	5.19946	0.0970085	6.81307	9.55081	3.50992	0.108543	0.607093
2000	1216	100.002	55.5999	0.144973	17.3903	0.972813	0.00641223	5.19912	0.0970085	6.81307	9.5508	3.50992	0.108542	0.607093
2000	1215	100.002	55.5999	0.144973	17.3903	0.973186	0.00641223	5.19878	0.0970085	6.81307	9.5508	3.50992	0.108542	0.607093
2000	1214	100.002	55.5999	0.144973	17.3903	0.973562	0.00641222	5.19844	0.0970084	6.81307	9.5508	3.50991	0.108542	0.607092
2000	1213	100.002	55.5998	0.144973	17.3903	0.973939	0.00641222	5.1981	0.0970084	6.81306	9.55079	3.50991	0.108542	0.607092
2000	1212	100.003	55.5998	0.144973	17.3903	0.974318	0.00641222	5.19776	0.0970084	6.81306	9.55079	3.50991	0.108542	0.607092
2000	1211	100.003	55.5998	0.144973	17.3903	0.974699	0.00641222	5.19741	0.0970083	6.81306	9.55079	3.50991	0.108542	0.607092
2000	1210	100.003	55.5998	0.144973	17.3903	0.975082	0.00641221	5.19707	0.0970083	6.81306	9.55078	3.50991	0.108542	0.607092
2000	1209	100.003	55.5998	0.144973	17.3903	0.975467	0.00641221	5.19672	0.0970082	6.81305	9.55078	3.50991	0.108542	0.607091
2000	1208	100.003	55.5997	0.144973	17.3903	0.975854	0.00641221	5.19637	0.0970082	6.81305	9.55078	3.50991	0.108542	0.607091
2000	1207	100.003	55.5997	0.144973	17.3903	0.976242	0.00641221	5.19602	0.0970082	6.81305	9.55077	3.50991	0.108542	0.607091
2000	1206	100.003	55.5997	0.144973	17.3903	0.976633	0.0064122	5.19566	0.0970081	6.81305	9.55077	3.5099	0.108542	0.607091
2000	1205	100.003	55.5997	0.144973	17.3903	0.977026	0.0064122	5.19531	0.0970081	6.81304	9.55076	3.5099	0.108542	0.60709
2000	1204	100.003	55.5996	0.144973	17.3903	0.97742	0.0064122	5.19495	0.0970081	6.81304	9.55076	3.5099	0.108542	0.60709
2000	1203	100.003	55.5996	0.144972	17.3903	0.977817	0.0064122	5.19459	0.097008	6.81304	9.55076	3.5099	0.108542	0.60709
2000	1202	100.003	55.5996	0.144972	17.3902	0.978215	0.00641219	5.19423	0.097008	6.81303	9.55075	3.5099	0.108542	0.60709
2000	1201	100.003	55.5996	0.144972	17.3902	0.978615	0.00641219	5.19387	0.0970079	6.81303	9.55075	3.5099	0.108542	0.607089
2000	1200	100.003	55.5996	0.144972	17.3902	0.979018	0.00641219	5.1935	0.0970079	6.81303	9.55074	3.5099	0.108542	0.607089
2000	1199	99.7054	55.6003	0.145364	17.4349	0.978678	0.00643133	5.18361	0.0972974	6.74202	9.57333	3.5203	0.108866	0.608901
2000	1198	99.5701	55.6006	0.145544	17.4553	0.978737	0.00644007	5.17886	0.0974297	6.70963	9.58362	3.52506	0.109014	0.609729
2000	1197	99.4352	55.601	0.145722	17.4757	0.97879	0.0064488	5.17408	0.0975618	6.67733	9.59387	3.52981	0.109162	0.610555
2000	1196	99.301	55.6013	0.145901	17.4961	0.97884	0.00645752	5.16927	0.0976937	6.64512	9.6041	3.53455	0.109309	0.611381
2000	1195	97.9709	55.6558	0.147819	17.4323	0.986256	0.00654519	5.20056	0.09902	6.59598	9.58994	3.55542	0.110679	0.619681
2000	1194	96.7043	55.7087	0.149695	17.3709	0.993463	0.00663091	5.23071	0.100317	6.5476	9.57649	3.57575	0.112017	0.627797
2000	1193	95.4709	55.7613	0.151569	17.3096	1.00064	0.00671658	5.2606	0.101613	6.49958	9.56315	3.59593	0.113352	0.635908
2000	1192	94.2693	55.8137	0.153442	17.2487	1.00778	0.0068022	5.29021	0.102908	6.45191	9.54994	3.61596	0.114685	0.644014
2000	1191	93.0983	55.8658	0.155313	17.188	1.01488	0.00688775	5.31957	0.104203	6.40458	9.53684	3.63584	0.116015	0.652114
2000	1190	91.9568	55.9176	0.157183	17.1275	1.02196	0.00697325	5.34867	0.105496	6.35759	9.52384	3.65558	0.117343	0.660209
2000	1189	90.8437	55.9693	0.159052	17.0673	1.029	0.00705869	5.37751	0.106789	6.31093	9.51096	3.67517	0.118668	0.668299
2000	1188	89.7579	56.0206	0.16092	17.0073	1.03602	0.00714408	5.4061	0.10808	6.2646	9.49818	3.69463	0.11999	0.676383
2000	1187	88.6985	56.0717	0.162786	16.9476	1.043	0.00722941	5.43445	0.109371	6.2186	9.48551	3.71395	0.12131	0.684462
2000	1186	87.6645	56.1226	0.164651	16.8881	1.04995	0.00731468	5.46254	0.110661	6.17291	9.47294	3.73314	0.122627	0.692535
2000	1185	86.655	56.1733	0.166515	16.8288	1.05687	0.0073999	5.49039	0.111951	6.12754	9.46047	3.75219	0.123942	0.700603
2000	1184	85.6691	56.2237	0.168377	16.7698	1.06376	0.00748506	5.518	0.113239	6.08248	9.44809	3.77112	0.125254	0.708665
2000	1183	84.706	56.2739	0.170238	16.711	1.07062	0.00757016	5.54538	0.114526	6.03773	9.4358	3.78991	0.126564	0.716723
2000	1182	83.6458	56.332	0.172205	16.6828	1.07636	0.00766611	5.57366	0.115978	5.98184	9.38859	3.81504	0.128061	0.725808
2000	1181	82.6034	56.3904	0.174176	16.6572	1.08196	0.00776285	5.60178	0.117442	5.92554	9.33874	3.84049	0.129571	0.734967
2000	1180	81.5884	56.4485	0.17614	16.6314	1.08752	0.00785943	5.62965	0.118903	5.86982	9.28929	3.86572	0.131076	0.74411
2000	1179	80.5996	56.5064	0.178099	16.6054	1.09305	0.00795585	5.65725	0.120361	5.81467	9.24022	3.89072	0.132577	0.753239
2000	1178	79.6361	56.564	0.180052	16.5794	1.09853	0.00805211	5.68462	0.121818	5.76008	9.19154	3.9155	0.134073	0.762352
2000	1177	78.6968	56.6213	0.182	16.5532	1.10398	0.00814821	5.71173	0.123272	5.70604	9.14324	3.94006	0.135566	0.771451
2000	1176	77.781	56.6783	0.183942	16.5269	1.10939	0.00824415	5.73861	0.124723	5.65255	9.09532	3.9644	0.137054	0.780535
2000	1175	76.8876	56.7351	0.185879	16.5005	1.11477	0.00833994	5.76525	0.126172	5.5996	9.04776	3.98852	0.138538	0.789603
2000	1174	76.016	56.7915	0.18781	16.474	1.12012	0.00843557	5.79166	0.127619	5.54718	9.00057	4.01243	0.140018	0.798658
2000	1173	75.1652	56.8477	0.189736	16.4473	1.12543	0.00853105	5.81784	0.129063	5.49528	8.95374	4.03613	0.141494	0.807697
2000	1172	74.3346	56.9037	0.191657	16.4205	1.1307	0.00862637	5.8438	0.130506	5.44391	8.90727	4.05962	0.142966	0.816722
2000	1171	73.5234	56.9593	0.193573	16.3937	1.13595	0.00872155	5.86954	0.131945	5.39304	8.86115	4.08291	0.144434	0.825733
2000	1170	72.731	57.0148	0.195483	16.3667	1.14116	0.00881657	5.89506	0.133383	5.34268	8.81539	4.10599	0.145898	0.83473
2000	1169	71.9354	57.073	0.197444	16.3401	1.14566	0.00891408	5.91595	0.134858	5.29256	8.77051	4.12974	0.1474	0.843962
2000	1168	71.1525	57.1312	0.199419	16.3126	1.15015	0.00901217	5.93651	0.136342	5.2423	8.72688	4.1534	0.148908	0.853248
2000	1167	70.3876	57.1892	0.201388	16.285	1.15462	0.0091101	5.95688	0.137824	5.19255	8.68358	4.17686	0.150413	0.86252
2000	1166	69.6401	57.247	0.203353	16.2573	1.15906	0.00920789	5.97705	0.139303	5.1433	8.64059	4.20012	0.151913	0.871779
2000	1165	68.9093	57.3045	0.205312	16.2296	1.16348	0.00930554	5.99703	0.14078	5.09453	8.59791	4.22318	0.15341	0.881024
2000	1164	68.1948	57.3617	0.207267	16.2017	1.16787	0.00940304	6.01683	0.142255	5.04625	8.55554	4.24605	0.154903	0.890255
2000	1163	67.4959	57.4187	0.209216	16.1737	1.17224	0.0095004	6.03644	0.143728	4.99846	8.51348	4.26872	0.156392	0.899473
2000	1162	66.8122	57.4754	0.211161	16.1455	1.17658	0.00959762	6.05587	0.145199	4.95113	8.47172	4.29121	0.157877	0.908677
2000	1161	66.1432	57.5319	0.213101	16.1173	1.18089	0.0096947	6.07512	0.146668	4.90427	8.43026	4.3135	0.159358	0.917868
2000	1160	65.4883	57.5882	0.215037	16.089	1.18519	0.00979164	6.09419	0.148134	4.85788	8.38909	4.33561	0.160836	0.927046
2000	1159	64.8473	57.6442	0.216967	16.0606	1.18946	0.00988844	6.1131	0.149599	4.81193	8.34822	4.35753	0.16231	0.936211
2000	1158	64.2195	57.6999	0.218893	16.0321	1.1937	0.0099851	6.13183	0.151061	4.76644	8.30763	4.37927	0.16378	0.945363
2000	1157	63.6046	57.7555	0.220815	16.0035	1.19793	0.0100816	6.1504	0.152522	4.72139	8.26734	4.40083	0.165246	0.954503
2000	1156	63.0021	57.8108	0.222732	15.9748	1.20213	0.010178	6.1688	0.15398	4.67678	8.22732	4.42221	0.166709	0.96363
2000	1155	62.4118	57.8658	0.224644	15.946	1.20632	0.0102743	6.18704	0.155437	4.63261	8.18759	4.44341	0.168168	0.972744
2000	1154	61.8333	57.9206	0.226552	15.9171	1.21048	0.0103704	6.20512	0.156891	4.58886	8.14814	4.46443	0.169623	0.981846
2000	1153	61.2661	57.9752	0.228456	15.8881	1.21462	0.0104664	6.22304	0.158343	4.54553	8.10896	4.48528	0.171075	0.990935
2000	1152	60.71	58.0296	0.230356	15.859	1.21874	0.0105623	6.24081	0.159794	4.50262	8.07005	4.50596	0.172524	1.00001
2000	1151	60.1646	58.0837	0.232251	15.8299	1.22284	0.0106581	6.25843	0.161242	4.46013	8.03141	4.52646	0.173968	1.00908
2000	1150	59.6296	58.1376	0.234142	15.8006	1.22693	0.0107537	6.27589	0.162689	4.41803	7.99304	4.5468	0.17541	1.01813
2000	1149	59.1047	58.1912	0.236029	15.7713	1.23099	0.0108492	6.29321	0.164134	4.37635	7.95494	4.56697	0.176847	1.02717
2000	1148	58.5896	58.2447	0.237912	15.7418	1.23504	0.0109446	6.31038	0.165577	4.33505	7.91709	4.58697	0.178282	1.0362
2000	1147	58.0841	58.2979	0.239791	15.7123	1.23907	0.0110398	6.32741	0.167018	4.29415	7.87951	4.60681	0.179713	1.04522
2000	1146	57.5878	58.3509	0.241666	15.6828	1.24308	0.011135	6.3443	0.168457	4.25364	7.84218	4.62648	0.18114	1.05423
2000	1145	57.1006	58.4037	0.243537	15.6531	1.24707	0.01123	6.36105	0.169895	4.21351	7.8051	4.646	0.182564	1.06322
2000	1144	56.6221	58.4563	0.245404	15.6233	1.25105	0.0113249	6.37766	0.17133	4.17376	7.76828	4.66535	0.183985	1.07221
2000	1143	56.1521	58.5087	0.247268	15.5935	1.25501	0.0114197	6.39413	0.172764	4.13438	7.7317	4.68455	0.185402	1.08118
2000	1142	55.6905	58.5608	0.249127	15.5636	1.25896	0.0115143	6.41048	0.174196	4.09537	7.69538	4.70359	0.186817	1.09015
2000	1141	55.2369	58.6127	0.250983	15.5336	1.26289	0.0116089	6.42669	0.175627	4.05673	7.65929	4.72247	0.188227	1.0991
2000	1140	54.7911	58.6645	0.252836	15.5036	1.2668	0.0117033	6.44276	0.177056	4.01845	7.62345	4.7412	0.189635	1.10804
2000	1139	54.353	58.716	0.254684	15.4735	1.2707	0.0117977	6.45871	0.178483	3.98052	7.58785	4.75978	0.191039	1.11697
2000	1138	53.9223	58.7673	0.256529	15.4433	1.27459	0.0118919	6.47454	0.179908	3.94294	7.55248	4.7782	0.192441	1.12589
2000	1137	53.4989	58.8184	0.258371	15.413	1.27846	0.011986	6.49024	0.181332	3.90572	7.51735	4.79648	0.193839	1.1348
2000	1136	53.0826	58.8693	0.260209	15.3827	1.28231	0.01208	6.50581	0.182754	3.86883	7.48245	4.81461	0.195233	1.1437
2000	1135	52.6731	58.92	0.262044	15.3523	1.28615	0.0121739	6.52126	0.184175	3.83229	7.44779	4.83259	0.196625	1.15259
2000	1134	52.2704	58.9705	0.263875	15.3218	1.28998	0.0122677	6.5366	0.185594	3.79608	7.41335	4.85043	0.198014	1.16148
2000	1133	51.8741	59.0208	0.265703	15.2913	1.29379	0.0123614	6.55181	0.187012	3.7602	7.37914	4.86812	0.1994	1.17035
2000	1132	51.4843	59.0709	0.267527	15.2607	1.2976	0.012455	6.5669	0.188428	3.72465	7.34515	4.88567	0.200782	1.17921
2000	1131	51.1007	59.1209	0.269349	15.23	1.30138	0.0125485	6.58188	0.189842	3.68943	7.31138	4.90308	0.202162	1.18806
2000	1130	50.7231	59.1706	0.271167	15.1993	1.30516	0.0126419	6.59675	0.191256	3.65452	7.27784	4.92034	0.203538	1.1969
2000	1129	50.3515	59.2201	0.272982	15.1685	1.30892	0.0127352	6.6115	0.192667	3.61993	7.24451	4.93747	0.204912	1.20574
2000	1128	49.9856	59.2694	0.274794	15.1377	1.31267	0.0128284	6.62613	0.194077	3.58566	7.21139	4.95446	0.206282	1.21456
2000	1127	49.6254	59.3186	0.276603	15.1068	1.31641	0.0129216	6.64066	0.195486	3.55169	7.1785	4.97132	0.20765	1.22338
2000	1126	49.2707	59.3676	0.278409	15.0758	1.32014	0.0130146	6.65508	0.196893	3.51803	7.14581	4.98804	0.209015	1.23219
2000	1125	48.9214	59.4163	0.280212	15.0448	1.32386	0.0131075	6.66939	0.198299	3.48467	7.11333	5.00462	0.210377	1.24099
2000	1124	48.5773	59.4649	0.282012	15.0137	1.32756	0.0132004	6.68359	0.199704	3.45162	7.08107	5.02107	0.211736	1.24978
2000	1123	48.2383	59.5133	0.283809	14.9826	1.33126	0.0132931	6.69768	0.201107	3.41885	7.049	5.03739	0.213092	1.25856
2000	1122	47.9043	59.5616	0.285603	14.9514	1.33494	0.0133858	6.71167	0.202509	3.38638	7.01715	5.05358	0.214445	1.26733
2000	1121	47.5753	59.6096	0.287394	14.9202	1.33861	0.0134784	6.72556	0.20391	3.3542	6.98549	5.06964	0.215796	1.2761
2000	1120	47.251	59.6575	0.289183	14.8889	1.34227	0.0135709	6.73934	0.20531	3.3223	6.95404	5.08557	0.217144	1.28486
2000	1119	46.9314	59.7052	0.290969	14.8576	1.34592	0.0136633	6.75302	0.206708	3.29069	6.92278	5.10138	0.218489	1.29361
2000	1118	46.6163	59.7527	0.292752	14.8262	1.34957	0.0137557	6.7666	0.208105	3.25936	6.89173	5.11705	0.219831	1.30235
2000	1117	46.3057	59.8	0.294533	14.7948	1.3532	0.0138479	6.78008	0.209501	3.2283	6.86086	5.13261	0.221171	1.31108
2000	1116	45.9995	59.8472	0.296311	14.7633	1.35682	0.0139401	6.79346	0.210895	3.19752	6.8302	5.14804	0.222508	1.31981
2000	1115	45.6976	59.8942	0.298086	14.7318	1.36043	0.0140322	6.80674	0.212289	3.167	6.79972	5.16334	0.223843	1.32853
2000	1114	45.3998	59.941	0.299859	14.7002	1.36403	0.0141242	6.81992	0.213681	3.13675	6.76943	5.17853	0.225174	1.33725
2000	1113	45.1062	59.9877	0.301629	14.6686	1.36763	0.0142162	6.83301	0.215072	3.10677	6.73934	5.19359	0.226503	1.34595
2000	1112	44.8165	60.0342	0.303397	14.6369	1.37121	0.0143081	6.846	0.216462	3.07705	6.70943	5.20853	0.22783	1.35465
2000	1111	44.5308	60.0805	0.305162	14.6052	1.37479	0.0143999	6.8589	0.217851	3.04759	6.6797	5.22336	0.229154	1.36334
2000	1110	44.2489	60.1267	0.306925	14.5735	1.37835	0.0144916	6.8717	0.219239	3.01838	6.65016	5.23807	0.230475	1.37203
2000	1109	43.9707	60.1727	0.308686	14.5417	1.38191	0.0145833	6.88441	0.220626	2.98943	6.6208	5.25266	0.231794	1.38071
2000	1108	43.6963	60.2185	0.310444	14.5099	1.38546	0.0146749	6.89703	0.222012	2.96073	6.59163	5.26714	0.233111	1.38938
2000	1107	43.4254	60.2642	0.3122	14.478	1.389	0.0147664	6.90955	0.223396	2.93227	6.56263	5.2815	0.234424	1.39805
2000	1106	43.1581	60.3097	0.313953	14.4461	1.39253	0.0148579	6.92199	0.22478	2.90406	6.53381	5.29574	0.235736	1.40671
2000	1105	42.8942	60.3551	0.315705	14.4142	1.39606	0.0149493	6.93433	0.226163	2.87609	6.50516	5.30988	0.237045	1.41536
2000	1104	42.6337	60.4003	0.317454	14.3822	1.39957	0.0150406	6.94658	0.227545	2.84836	6.47669	5.3239	0.238351	1.42401
2000	1103	42.3765	60.4453	0.319201	14.3502	1.40308	0.0151319	6.95875	0.228926	2.82087	6.4484	5.33781	0.239656	1.43265
2000	1102	42.1226	60.4902	0.320946	14.3182	1.40658	0.0152231	6.97082	0.230306	2.79362	6.42027	5.35162	0.240957	1.44129
2000	1101	41.8718	60.5349	0.322689	14.2861	1.41008	0.0153143	6.98281	0.231685	2.76659	6.39232	5.36531	0.242257	1.44992
2000	1100	41.6242	60.5795	0.32443	14.254	1.41356	0.0154054	6.99471	0.233063	2.7398	6.36453	5.3789	0.243554	1.45854
2000	1099	41.3797	60.624	0.326169	14.2218	1.41704	0.0154965	7.00652	0.234441	2.71323	6.33692	5.39237	0.244848	1.46716
2000	1098	41.1381	60.6683	0.327906	14.1897	1.42051	0.0155874	7.01825	0.235817	2.68689	6.30946	5.40575	0.246141	1.47578
2000	1097	40.8995	60.7124	0.32964	14.1574	1.42397	0.0156784	7.02989	0.237193	2.66077	6.28218	5.41901	0.247431	1.48439
2000	1096	40.6638	60.7564	0.331373	14.1252	1.42743	0.0157693	7.04145	0.238568	2.63487	6.25505	5.43218	0.248718	1.49299
2000	1095	40.4309	60.8002	0.333104	14.0929	1.43088	0.0158601	7.05292	0.239942	2.60919	6.22809	5.44524	0.250004	1.50159
2000	1094	40.2008	60.8439	0.334833	14.0606	1.43432	0.0159509	7.0643	0.241316	2.58372	6.20129	5.45819	0.251287	1.51019
2000	1093	39.9734	60.8875	0.33656	14.0283	1.43776	0.0160416	7.0756	0.242688	2.55847	6.17465	5.47105	0.252568	1.51878
2000	1092	39.7487	60.9309	0.338286	13.996	1.44119	0.0161323	7.08682	0.24406	2.53343	6.14817	5.4838	0.253847	1.52736
2000	1091	39.5266	60.9742	0.340009	13.9636	1.44461	0.0162229	7.09796	0.245431	2.5086	6.12184	5.49645	0.255124	1.53594
2000	1090	39.3072	61.0173	0.341731	13.9312	1.44803	0.0163135	7.10901	0.246802	2.48398	6.09567	5.50901	0.256398	1.54452
2000	1089	39.0902	61.0604	0.343451	13.8988	1.45144	0.0164041	7.11998	0.248172	2.45956	6.06965	5.52146	0.257671	1.55309
2000	1088	38.8757	61.1032	0.345169	13.8663	1.45484	0.0164946	7.13087	0.249541	2.43534	6.04379	5.53382	0.258941	1.56166
2000	1087	38.6637	61.146	0.346886	13.8338	1.45823	0.016585	7.14167	0.250909	2.41132	6.01808	5.54608	0.260209	1.57023
2000	1086	38.454	61.1885	0.348601	13.8013	1.46162	0.0166754	7.1524	0.252277	2.38751	5.99252	5.55825	0.261475	1.57879
2000	1085	38.2467	61.231	0.350314	13.7688	1.46501	0.0167658	7.16304	0.253645	2.36389	5.96711	5.57032	0.262739	1.58734
2000	1084	38.0418	61.2733	0.352026	13.7363	1.46839	0.0168562	7.1736	0.255011	2.34046	5.94184	5.5823	0.264	1.5959
2000	1083	37.8391	61.3155	0.353736	13.7037	1.47176	0.0169465	7.18408	0.256377	2.31723	5.91673	5.59418	0.26526	1.60445
2000	1082	37.6386	61.3576	0.355445	13.6711	1.47512	0.0170367	7.19448	0.257743	2.29419	5.89176	5.60597	0.266518	1.61299
2000	1081	37.4403	61.3996	0.357152	13.6385	1.47848	0.017127	7.2048	0.259108	2.27133	5.86693	5.61767	0.267773	1.62154
2000	1080	37.2442	61.4414	0.358857	13.6059	1.48184	0.0172171	7.21504	0.260473	2.24867	5.84225	5.62927	0.269027	1.63007
2000	1079	37.0501	61.4831	0.360561	13.5733	1.48518	0.0173073	7.2252	0.261837	2.22619	5.81771	5.64079	0.270279	1.63861
2000	1078	36.8582	61.5246	0.362264	13.5406	1.48852	0.0173974	7.23529	0.2632	2.20389	5.79331	5.65221	0.271528	1.64714
2000	1077	36.6683	61.5661	0.363965	13.5079	1.49186	0.0174875	7.24529	0.264563	2.18178	5.76905	5.66355	0.272776	1.65567
2000	1076	36.4804	61.6074	0.365665	13.4753	1.49519	0.0175776	7.25521	0.265926	2.15984	5.74494	5.6748	0.274022	1.6642
2000	1075	36.2945	61.6486	0.367363	13.4425	1.49852	0.0176676	7.26505	0.267288	2.13808	5.72095	5.68596	0.275266	1.67273
2000	1074	36.1105	61.6897	0.36906	13.4098	1.50183	0.0177576	7.27482	0.26865	2.1165	5.69711	5.69703	0.276508	1.68125
2000	1073	35.9285	61.7306	0.370755	13.3771	1.50515	0.0178476	7.2845	0.270011	2.0951	5.6734	5.70802	0.277748	1.68977
2000	1072	35.7483	61.7714	0.37245	13.3443	1.50845	0.0179376	7.29411	0.271372	2.07386	5.64983	5.71892	0.278986	1.69828
2000	1071	35.57	61.8122	0.374143	13.3116	1.51176	0.0180275	7.30364	0.272732	2.0528	5.62639	5.72974	0.280222	1.7068
2000	1070	35.3934	61.8528	0.375834	13.2788	1.51505	0.0181174	7.31309	0.274093	2.03191	5.60308	5.74048	0.281456	1.71531
2000	1069	35.2187	61.8933	0.377524	13.246	1.51834	0.0182073	7.32246	0.275452	2.01119	5.57991	5.75113	0.282689	1.72382
2000	1068	35.0457	61.9336	0.379214	13.2132	1.52163	0.0182972	7.33175	0.276812	1.99063	5.55687	5.76169	0.28392	1.73233
2000	1067	34.8745	61.9739	0.380901	13.1804	1.52491	0.018387	7.34096	0.278171	1.97024	5.53395	5.77218	0.285149	1.74083
2000	1066	34.705	62.0141	0.382588	13.1476	1.52818	0.0184768	7.3501	0.27953	1.95001	5.51117	5.78259	0.286376	1.74934
2000	1065	34.5371	62.0541	0.384274	13.1148	1.53145	0.0185666	7.35915	0.280889	1.92994	5.48851	5.79291	0.287601	1.75784
2000	1064	34.3705	62.0946	0.38594	13.082	1.53465	0.0184385	7.36779	0.282251	1.90997	5.46597	5.80322	0.288828	1.76636
2000	1063	34.2051	62.1354	0.387589	13.0492	1.53781	0.0181446	7.37608	0.283615	1.89012	5.44355	5.81351	0.290056	1.7749
2000	1062	34.0414	62.1761	0.389235	13.0164	1.54095	0.0178512	7.38428	0.284979	1.87043	5.42126	5.82371	0.291283	1.78344
2000	1061	33.8792	62.2168	0.390877	12.9837	1.54409	0.0175583	7.39238	0.286343	1.8509	5.39908	5.83384	0.292508	1.79198
2000	1060	33.7186	62.2573	0.392518	12.9509	1.54722	0.0172659	7.4004	0.287707	1.83152	5.37704	5.8439	0.293731	1.80051
2000	1059	33.5595	62.2978	0.394156	12.9181	1.55035	0.016974	7.40833	0.289071	1.81229	5.35511	5.85388	0.294953	1.80905
2000	1058	33.4019	62.3381	0.395791	12.8853	1.55346	0.0166824	7.41617	0.290435	1.79322	5.3333	5.86378	0.296173	1.81758
2000	1057	33.2458	62.3784	0.397424	12.8525	1.55657	0.0163913	7.42393	0.291799	1.77429	5.31161	5.87361	0.297391	1.82612
2000	1056	33.0911	62.4185	0.399054	12.8197	1.55967	0.0161005	7.43159	0.293163	1.75552	5.29004	5.88337	0.298608	1.83465
2000	1055	32.9379	62.4586	0.400681	12.7869	1.56277	0.0158101	7.43917	0.294526	1.7369	5.26859	5.89305	0.299823	1.84319
2000	1054	32.7861	62.4986	0.402306	12.7541	1.56585	0.0155199	7.44665	0.29589	1.71842	5.24726	5.90266	0.301037	1.85172
2000	1053	32.6357	62.5385	0.403928	12.7212	1.56893	0.01523	7.45405	0.297254	1.70008	5.22604	5.9122	0.302249	1.86026
2000	1052	32.4867	62.5784	0.405547	12.6884	1.572	0.0149404	7.46135	0.298617	1.6819	5.20494	5.92166	0.30346	1.86879
2000	1051	32.339	62.6181	0.407163	12.6556	1.57507	0.0146509	7.46857	0.299981	1.66385	5.18395	5.93106	0.304669	1.87732
2000	1050	32.1926	62.6578	0.408775	12.6228	1.57812	0.0143616	7.47569	0.301345	1.64595	5.16308	5.94039	0.305877	1.88586
2000	1049	32.0476	62.6974	0.410385	12.59	1.58117	0.0140724	7.48271	0.302709	1.62818	5.14232	5.94965	0.307083	1.89439
2000	1048	31.9038	62.7369	0.411991	12.5571	1.58421	0.0137833	7.48965	0.304073	1.61056	5.12167	5.95884	0.308288	1.90293
2000	1047	31.7613	62.7763	0.413594	12.5243	1.58724	0.0134942	7.49648	0.305437	1.59307	5.10113	5.96796	0.309492	1.91147
2000	1046	31.6201	62.8157	0.415193	12.4915	1.59026	0.0132052	7.50323	0.306801	1.57572	5.0807	5.97702	0.310694	1.92
2000	1045	31.4801	62.855	0.416789	12.4587	1.59327	0.0129162	7.50987	0.308165	1.55851	5.06038	5.986	0.311894	1.92854
2000	1044	31.3413	62.8942	0.418381	12.4258	1.59628	0.0126272	7.51642	0.30953	1.54143	5.04017	5.99493	0.313093	1.93708
2000	1043	31.2038	62.9334	0.419968	12.393	1.59927	0.0123381	7.52287	0.310895	1.52448	5.02006	6.00379	0.314291	1.94562
2000	1042	31.0674	62.9725	0.421552	12.3602	1.60226	0.012049	7.52921	0.31226	1.50767	5.00006	6.01258	0.315488	1.95417
2000	1041	30.9321	63.0115	0.423131	12.3274	1.60523	0.0117597	7.53546	0.313625	1.49098	4.98017	6.02131	0.316683	1.96271
2000	1040	30.798	63.0505	0.424706	12.2946	1.6082	0.0114704	7.54161	0.31499	1.47443	4.96038	6.02998	0.317877	1.97126
2000	1039	30.665	63.0894	0.426276	12.2618	1.61115	0.0111809	7.54765	0.316356	1.458	4.9407	6.03859	0.31907	1.9798
2000	1038	30.5332	63.1283	0.427841	12.229	1.6141	0.0108913	7.55358	0.317723	1.44171	4.92112	6.04714	0.320262	1.98835
2000	1037	30.4024	63.1671	0.429401	12.1962	1.61704	0.0106015	7.55941	0.319089	1.42554	4.90164	6.05562	0.321452	1.9969
2000	1036	30.2727	63.2059	0.430955	12.1634	1.61996	0.0103116	7.56514	0.320456	1.40949	4.88227	6.06404	0.322641	2.00546
2000	1035	30.1441	63.2446	0.432504	12.1306	1.62287	0.0100216	7.57075	0.321823	1.39357	4.86299	6.07241	0.323829	2.01402
2000	1034	30.0165	63.2833	0.434046	12.0978	1.62577	0.00973151	7.57625	0.323191	1.37778	4.84381	6.08072	0.325016	2.02258
2000	1033	29.89	63.3219	0.435582	12.065	1.62867	0.00944131	7.58164	0.324559	1.3621	4.82474	6.08896	0.326202	2.03114
2000	1032	29.7645	63.3605	0.437112	12.0323	1.63154	0.00915106	7.58692	0.325928	1.34655	4.80576	6.09715	0.327386	2.0397
2000	1031	29.64	63.3991	0.438634	11.9995	1.63441	0.00886081	7.59208	0.327297	1.33112	4.78688	6.10529	0.32857	2.04827
2000	1030	29.5164	63.4376	0.440149	11.9668	1.63726	0.0085706	7.59712	0.328667	1.31581	4.76809	6.11337	0.329752	2.05684
2000	1029	29.3939	63.4761	0.441656	11.934	1.6401	0.00828051	7.60204	0.330037	1.30061	4.74941	6.12139	0.330934	2.06542
2000	1028	29.2723	63.5145	0.443155	11.9013	1.64293	0.00799062	7.60685	0.331408	1.28554	4.73081	6.12936	0.332114	2.074
2000	1027	29.1516	63.553	0.444645	11.8686	1.64574	0.00770101	7.61152	0.33278	1.27058	4.71231	6.13727	0.333293	2.08258
2000	1026	29.0319	63.5914	0.446126	11.8359	1.64854	0.0074118	7.61607	0.334152	1.25574	4.69391	6.14514	0.334472	2.09117
2000	1025	28.9131	63.6298	0.447597	11.8032	1.65133	0.00712311	7.6205	0.335525	1.24101	4.67559	6.15295	0.33565	2.09976
2000	1024	28.7952	63.6682	0.449058	11.7705	1.65409	0.00683509	7.62479	0.336899	1.2264	4.65737	6.1607	0.336826	2.10836
2000	1023	28.6782	63.7065	0.450508	11.7378	1.65685	0.00654789	7.62895	0.338273	1.21191	4.63924	6.16841	0.338002	2.11696
2000	1022	28.5621	63.7449	0.451946	11.7051	1.65958	0.0062617	7.63297	0.339649	1.19752	4.6212	6.17607	0.339177	2.12557
2000	1021	28.4468	63.7833	0.453372	11.6725	1.66231	0.00597671	7.63686	0.341025	1.18325	4.60325	6.18368	0.340352	2.13418
2000	1020	28.3324	63.8216	0.454786	11.6398	1.66501	0.00569316	7.64061	0.342402	1.16909	4.58539	6.19124	0.341525	2.1428
2000	1019	28.2188	63.86	0.456186	11.6072	1.6677	0.00541127	7.64421	0.34378	1.15504	4.56761	6.19875	0.342698	2.15143
2000	1018	28.1061	63.8984	0.457571	11.5746	1.67036	0.00513134	7.64767	0.345159	1.1411	4.54992	6.20621	0.343871	2.16006
2000	1017	27.9942	63.9368	0.458942	11.5419	1.67301	0.00485364	7.65098	0.346539	1.12727	4.53232	6.21363	0.345042	2.16869
2000	1016	27.883	63.9752	0.460296	11.5093	1.67565	0.00457849	7.65414	0.347921	1.11355	4.51481	6.221	0.346213	2.17734
2000	1015	27.7727	64.0136	0.461634	11.4767	1.67826	0.00430626	7.65715	0.349303	1.09994	4.49738	6.22832	0.347384	2.18599
2000	1014	27.6631	64.0521	0.462953	11.4442	1.68085	0.00403729	7.65999	0.350687	1.08643	4.48003	6.23561	0.348554	2.19465
2000	1013	27.5543	64.0905	0.464254	11.4116	1.68342	0.00377201	7.66268	0.352071	1.07303	4.46277	6.24285	0.349723	2.20331
2000	1012	27.4463	64.1291	0.465535	11.379	1.68596	0.00351083	7.6652	0.353457	1.05974	4.44558	6.25004	0.350892	2.21199
2000	1011	27.339	64.1676	0.466796	11.3465	1.68849	0.00325421	7.66755	0.354844	1.04655	4.42848	6.25719	0.352061	2.22067
2000	1010	27.2324	64.2062	0.468034	11.314	1.69099	0.00300264	7.66974	0.356233	1.03347	4.41146	6.26431	0.353229	2.22936
2000	1009	27.1266	64.2449	0.469248	11.2814	1.69347	0.00275663	7.67174	0.357623	1.0205	4.39453	6.27138	0.354397	2.23806
2000	1008	27.0214	64.2836	0.470439	11.2489	1.69592	0.00251672	7.67357	0.359014	1.00763	4.37767	6.27841	0.355565	2.24676
2000	1007	26.917	64.3223	0.471603	11.2165	1.69835	0.0022835	7.67522	0.360407	0.994858	4.36088	6.2854	0.356732	2.25548
2000	1006	26.8132	64.3612	0.47274	11.184	1.70075	0.00205754	7.67668	0.361802	0.982194	4.34418	6.29235	0.357899	2.26421
2000	1005	26.7102	64.4001	0.473849	11.1515	1.70313	0.00183949	7.67795	0.363198	0.969633	4.32756	6.29927	0.359067	2.27294
2000	1004	26.6078	64.439	0.474927	11.1191	1.70547	0.00162999	7.67902	0.364596	0.957175	4.31101	6.30615	0.360234	2.28169
2000	1003	26.506	64.4781	0.475973	11.0866	1.70779	0.00142972	7.67989	0.365995	0.944819	4.29453	6.31299	0.3614	2.29045
2000	1002	26.4049	64.5173	0.476985	11.0542	1.71008	0.00123938	7.68056	0.367397	0.932566	4.27813	6.3198	0.362567	2.29922
2000	1001	26.3045	64.5565	0.477961	11.0218	1.71233	0.0010597	7.68101	0.3688	0.920414	4.2618	6.32658	0.363735	2.308
2000	1000	26.2046	64.5959	0.478898	10.9894	1.71456	0.000891401	7.68124	0.370205	0.908364	4.24555	6.33332	0.364902	2.3168
2000	999	26.1054	64.6354	0.479794	10.957	1.71674	0.000735258	7.68124	0.371612	0.896416	4.22937	6.34003	0.366069	2.3256
2000	998	26.0067	64.675	0.480646	10.9246	1.71889	0.000592039	7.681	0.373022	0.884568	4.21326	6.34671	0.367237	2.33442
2000	997	25.9087	64.7148	0.481448	10.8923	1.721	0.000462525	7.68051	0.374434	0.872823	4.19722	6.35336	0.368405	2.34326
2000	996	25.8112	64.7548	0.482196	10.8599	1.72307	0.000347504	7.67974	0.375848	0.861179	4.18125	6.35999	0.369574	2.35211
2000	995	25.7142	64.7949	0.482881	10.8276	1.72509	0.00024776	7.67867	0.377265	0.849637	4.16535	6.36659	0.370744	2.36098
2000	994	25.6178	64.8354	0.48349	10.7953	1.72704	0.000164061	7.67724	0.378686	0.838199	4.14951	6.37317	0.371915	2.36987
2000	993	25.5217	64.8763	0.484	10.763	1.72893	9.71423e-05	7.67538	0.380111	0.826867	4.13374	6.37975	0.373089	2.37879
2000	992	25.426	64.9178	0.484361	10.7307	1.7307	4.76622e-05	7.6729	0.381541	0.815646	4.11801	6.38634	0.374266	2.38774
2000	991	25.3303	64.9605	0.484438	10.6984	1.73227	1.60781e-05	7.66927	0.382983	0.804553	4.10233	6.39299	0.375452	2.39676
2000	990	25.2401	64.9934	0.486512	10.6662	1.73527	0	7.67324	0.384351	0.793308	4.08701	6.39879	0.376568	2.40532
2000	989	25.1296	65.0685	0.479964	10.6336	1.73206	0	7.64417	0.386042	0.783218	4.0705	6.40802	0.377975	2.4159
2000	988	25.0187	65.1462	0.472919	10.6011	1.72842	0	7.61292	0.387753	0.77331	4.05399	6.41741	0.379399	2.42661
2000	987	24.9089	65.2236	0.465959	10.5685	1.72478	0	7.58176	0.389463	0.76351	4.03759	6.42671	0.380819	2.43731
2000	986	24.8001	65.3007	0.459083	10.536	1.72114	0	7.55066	0.391171	0.753818	4.02128	6.43592	0.382236	2.448
2000	985	24.6924	65.3776	0.452291	10.5034	1.7175	0	7.51964	0.392878	0.744231	4.00508	6.44506	0.383649	2.45868
2000	984	24.5856	65.4542	0.44558	10.4709	1.71385	0	7.48869	0.394583	0.734749	3.98896	6.45411	0.38506	2.46936
2000	983	24.4799	65.5306	0.438951	10.4383	1.71019	0	7.45781	0.396287	0.72537	3.97295	6.46309	0.386467	2.48002
2000	982	24.3752	65.6067	0.432402	10.4058	1.70653	0	7.427	0.39799	0.716093	3.95703	6.47198	0.387871	2.49068
2000	981	24.2714	65.6825	0.425933	10.3732	1.70287	0	7.39625	0.399692	0.706917	3.9412	6.48079	0.389272	2.50133
2000	980	24.1686	65.7581	0.419541	10.3407	1.6992	0	7.36558	0.401392	0.69784	3.92546	6.48953	0.39067	2.51197
2000	979	24.0667	65.8335	0.413228	10.3082	1.69553	0	7.33496	0.403091	0.688862	3.90982	6.49819	0.392065	2.5226
2000	978	23.9658	65.9086	0.406991	10.2757	1.69185	0	7.30442	0.404788	0.679981	3.89427	6.50677	0.393457	2.53322
2000	977	23.8658	65.9835	0.40083	10.2432	1.68817	0	7.27393	0.406485	0.671197	3.8788	6.51528	0.394846	2.54384
2000	976	23.7667	66.0581	0.394744	10.2107	1.68448	0	7.24351	0.40818	0.662507	3.86343	6.52371	0.396231	2.55445
2000	975	23.6685	66.1325	0.388732	10.1782	1.68079	0	7.21315	0.409874	0.653912	3.84814	6.53207	0.397614	2.56505
2000	974	23.5711	66.2067	0.382794	10.1457	1.67709	0	7.18285	0.411567	0.645409	3.83294	6.54035	0.398993	2.57564
2000	973	23.4746	66.2806	0.376928	10.1132	1.67338	0	7.15261	0.413258	0.636998	3.81783	6.54856	0.40037	2.58623
2000	972	23.379	66.3543	0.371134	10.0808	1.66967	0	7.12243	0.414948	0.628678	3.8028	6.5567	0.401743	2.59681
2000	971	23.2842	66.4278	0.365411	10.0484	1.66595	0	7.09231	0.416638	0.620448	3.78785	6.56476	0.403114	2.60738
2000	970	23.1903	66.501	0.359758	10.0159	1.66223	0	7.06224	0.418325	0.612306	3.77299	6.57276	0.404481	2.61794
2000	969	23.0971	66.5741	0.354175	9.98352	1.6585	0	7.03223	0.420012	0.604253	3.75821	6.58068	0.405846	2.6285
2000	968	23.0048	66.6469	0.34866	9.95112	1.65476	0	7.00227	0.421698	0.596286	3.74352	6.58853	0.407208	2.63905
2000	967	22.9133	66.7195	0.343213	9.91874	1.65102	0	6.97237	0.423382	0.588405	3.7289	6.59632	0.408566	2.64959
2000	966	22.8225	66.7919	0.337834	9.88637	1.64727	0	6.94252	0.425066	0.580609	3.71437	6.60403	0.409922	2.66012
2000	965	22.7326	66.8641	0.332521	9.85402	1.64351	0	6.91273	0.426748	0.572898	3.69991	6.61168	0.411275	2.67065
2000	964	22.6434	66.936	0.327275	9.82169	1.63974	0	6.88299	0.428429	0.565269	3.68554	6.61926	0.412625	2.68117
2000	963	22.5549	67.0078	0.322093	9.78937	1.63597	0	6.8533	0.430109	0.557723	3.67124	6.62677	0.413972	2.69169
2000	962	22.4672	67.0793	0.316976	9.75707	1.63219	0	6.82366	0.431788	0.550258	3.65701	6.63422	0.415317	2.70219
2000	961	22.3802	67.1507	0.311923	9.72479	1.6284	0	6.79407	0.433466	0.542874	3.64287	6.6416	0.416658	2.71269
2000	960	22.294	67.2218	0.306933	9.69253	1.6246	0	6.76452	0.435143	0.535569	3.6288	6.64891	0.417997	2.72319
2000	959	22.2085	67.2927	0.302005	9.66029	1.6208	0	6.73503	0.436819	0.528344	3.6148	6.65617	0.419333	2.73367
2000	958	22.1237	67.3635	0.29714	9.62807	1.61699	0	6.70559	0.438493	0.521196	3.60088	6.66335	0.420666	2.74415
2000	957	22.0395	67.434	0.292336	9.59587	1.61317	0	6.67619	0.440167	0.514126	3.58703	6.67048	0.421996	2.75463
2000	956	21.9561	67.5044	0.287592	9.56368	1.60934	0	6.64684	0.441839	0.507132	3.57325	6.67754	0.423323	2.76509
2000	955	21.8734	67.5745	0.282908	9.53153	1.6055	0	6.61754	0.443511	0.500214	3.55955	6.68453	0.424648	2.77555
2000	954	21.7913	67.6445	0.278284	9.49939	1.60165	0	6.58828	0.445181	0.49337	3.54591	6.69147	0.425969	2.78601
2000	953	21.7099	67.7142	0.273719	9.46727	1.5978	0	6.55907	0.446851	0.486601	3.53235	6.69835	0.427288	2.79646
2000	952	21.6291	67.7838	0.269212	9.43518	1.59394	0	6.5299	0.448519	0.479905	3.51885	6.70516	0.428605	2.8069
2000	951	21.549	67.8532	0.264762	9.40311	1.59006	0	6.50078	0.450187	0.473282	3.50543	6.71191	0.429918	2.81733
2000	950	21.4695	67.9224	0.26037	9.37107	1.58618	0	6.4717	0.451853	0.466731	3.49207	6.71861	0.431229	2.82776
2000	949	21.3907	67.9914	0.256034	9.33905	1.58229	0	6.44267	0.453518	0.460251	3.47878	6.72524	0.432537	2.83818
2000	948	21.3125	68.0603	0.251754	9.30705	1.57839	0	6.41368	0.455183	0.453842	3.46556	6.73182	0.433842	2.8486
2000	947	21.2349	68.1289	0.247529	9.27508	1.57448	0	6.38473	0.456846	0.447502	3.4524	6.73834	0.435144	2.85901
2000	946	21.1579	68.1974	0.24336	9.24314	1.57057	0	6.35582	0.458508	0.441232	3.43931	6.7448	0.436444	2.86941
2000	945	21.0815	68.2657	0.239244	9.21122	1.56664	0	6.32695	0.46017	0.43503	3.42628	6.7512	0.437741	2.87981
2000	944	21.0057	68.3338	0.235182	9.17932	1.5627	0	6.29813	0.46183	0.428896	3.41332	6.75754	0.439036	2.8902
2000	943	20.9305	68.4018	0.231174	9.14746	1.55875	0	6.26935	0.463489	0.42283	3.40042	6.76383	0.440327	2.90058
2000	942	20.8559	68.4696	0.227218	9.11562	1.5548	0	6.2406	0.465148	0.416829	3.38758	6.77006	0.441616	2.91096
2000	941	20.7819	68.5372	0.223314	9.08381	1.55083	0	6.2119	0.466805	0.410895	3.37481	6.77624	0.442902	2.92133
2000	940	20.7084	68.6046	0.219462	9.05203	1.54686	0	6.18324	0.468461	0.405026	3.36209	6.78236	0.444186	2.9317
2000	939	20.6355	68.6719	0.215661	9.02027	1.54287	0	6.15462	0.470117	0.399222	3.34944	6.78843	0.445467	2.94206
2000	938	20.5631	68.7389	0.211911	8.98855	1.53887	0	6.12603	0.471771	0.393482	3.33685	6.79444	0.446745	2.95241
2000	937	20.4913	68.8059	0.208211	8.95686	1.53486	0	6.09749	0.473425	0.387805	3.32431	6.8004	0.44802	2.96276
2000	936	20.42	68.8726	0.20456	8.92519	1.53085	0	6.06898	0.475077	0.382191	3.31184	6.8063	0.449293	2.9731
2000	935	20.3493	68.9392	0.200959	8.89356	1.52682	0	6.04051	0.476728	0.37664	3.29942	6.81216	0.450563	2.98343
2000	934	20.2791	69.0056	0.197406	8.86195	1.52278	0	6.01209	0.478379	0.37115	3.28706	6.81796	0.451831	2.99376
2000	933	20.2094	69.0719	0.193902	8.83038	1.51873	0	5.9837	0.480028	0.365722	3.27476	6.8237	0.453095	3.00408
2000	932	20.1402	69.138	0.190445	8.79884	1.51467	0	5.95534	0.481677	0.360354	3.26252	6.8294	0.454358	3.0144
2000	931	20.0716	69.2039	0.187036	8.76733	1.51061	0	5.92703	0.483324	0.355046	3.25033	6.83504	0.455617	3.02471
2000	930	20.0034	69.2697	0.183673	8.73585	1.50652	0	5.89875	0.484971	0.349798	3.23819	6.84064	0.456874	3.03501
2000	929	19.9358	69.3353	0.180357	8.70441	1.50243	0	5.87051	0.486616	0.344609	3.22611	6.84618	0.458128	3.04531
2000	928	19.8687	69.4008	0.177086	8.67299	1.49833	0	5.84231	0.488261	0.339478	3.21409	6.85167	0.459379	3.0556
2000	927	19.802	69.4661	0.173861	8.64162	1.49422	0	5.81414	0.489904	0.334406	3.20212	6.85711	0.460628	3.06589
2000	926	19.7358	69.5313	0.170681	8.61027	1.49009	0	5.78601	0.491547	0.329391	3.1902	6.8625	0.461874	3.07617
2000	925	19.6701	69.5963	0.167545	8.57896	1.48596	0	5.75792	0.493188	0.324432	3.17833	6.86785	0.463118	3.08644
2000	924	19.6049	69.6611	0.164454	8.54768	1.48181	0	5.72987	0.494829	0.319531	3.16652	6.87314	0.464359	3.09671
2000	923	19.5402	69.7258	0.161406	8.51644	1.47766	0	5.70185	0.496468	0.314685	3.15475	6.87839	0.465597	3.10697
2000	922	19.4759	69.7903	0.158402	8.48524	1.47349	0	5.67387	0.498107	0.309895	3.14304	6.88358	0.466833	3.11722
2000	921	19.4121	69.8547	0.15544	8.45407	1.46931	0	5.64592	0.499744	0.30516	3.13138	6.88873	0.468066	3.12747
2000	920	19.3487	69.919	0.152521	8.42293	1.46512	0	5.61801	0.50138	0.300479	3.11976	6.89383	0.469296	3.13771
2000	919	19.2858	69.983	0.149643	8.39183	1.46092	0	5.59014	0.503016	0.295852	3.1082	6.89889	0.470524	3.14794
2000	918	19.2234	70.047	0.146807	8.36077	1.4567	0	5.5623	0.50465	0.291279	3.09668	6.9039	0.471749	3.15817
2000	917	19.1614	70.1108	0.144013	8.32975	1.45248	0	5.5345	0.506284	0.286759	3.08522	6.90886	0.472971	3.16839
2000	916	19.0998	70.1744	0.141259	8.29876	1.44824	0	5.50674	0.507916	0.282292	3.0738	6.91377	0.474191	3.17861
2000	915	19.0386	70.2379	0.138545	8.26781	1.444	0	5.47901	0.509547	0.277878	3.06242	6.91864	0.475408	3.18882
2000	914	18.9779	70.3013	0.135871	8.2369	1.43974	0	5.45132	0.511178	0.273515	3.05109	6.92347	0.476622	3.19902
2000	913	18.9176	70.3645	0.133237	8.20603	1.43547	0	5.42366	0.512807	0.269203	3.03981	6.92824	0.477834	3.20922
2000	912	18.8577	70.4276	0.130642	8.17519	1.43118	0	5.39605	0.514435	0.264942	3.02858	6.93298	0.479043	3.21941
2000	911	18.7983	70.4905	0.128086	8.14439	1.42689	0	5.36846	0.516062	0.260732	3.01739	6.93767	0.48025	3.22959
2000	910	18.7392	70.5533	0.125568	8.11364	1.42259	0	5.34092	0.517688	0.256572	3.00624	6.94231	0.481453	3.23976
2000	909	18.6806	70.6159	0.123088	8.08292	1.41827	0	5.31341	0.519313	0.252462	2.99514	6.94691	0.482655	3.24993
2000	908	18.6224	70.6784	0.120645	8.05224	1.41394	0	5.28594	0.520937	0.248401	2.98408	6.95147	0.483853	3.2601
2000	907	18.5645	70.7408	0.11824	8.02161	1.4096	0	5.2585	0.522559	0.244389	2.97306	6.95598	0.485049	3.27025
2000	906	18.5071	70.803	0.115872	7.99101	1.40525	0	5.23111	0.524181	0.240425	2.96209	6.96045	0.486242	3.2804
2000	905	18.4501	70.8651	0.113539	7.96045	1.40089	0	5.20375	0.525802	0.236509	2.95115	6.96488	0.487432	3.29054
2000	904	18.3934	70.927	0.111243	7.92994	1.39651	0	5.17642	0.527421	0.232641	2.94026	6.96926	0.48862	3.30068
2000	903	18.3372	70.9888	0.108983	7.89946	1.39213	0	5.14914	0.529039	0.228821	2.92941	6.9736	0.489805	3.3108
2000	902	18.2813	71.0505	0.106758	7.86903	1.38773	0	5.12189	0.530657	0.225047	2.9186	6.9779	0.490988	3.32092
2000	901	18.2258	71.112	0.104568	7.83864	1.38332	0	5.09468	0.532273	0.22132	2.90783	6.98216	0.492168	3.33104
2000	900	18.1706	71.1734	0.102412	7.80829	1.3789	0	5.06751	0.533888	0.217639	2.8971	6.98637	0.493345	3.34114
Title:	R-magma	-	mresidual	from	MZ-magma	at	T	=	1145	C
liquid_0	thermodynamic	data	and	composition:
Pressure	Temperature	mass	S	H	V	Cp	viscosity	SiO2	TiO2	Al2O3	Fe2O3	Cr2O3	FeO	MnO	MgO	CaO	Na2O	K2O	H2O	Mg#
2000	1400	99.9982	292.571	-1.23588e+06	39.6189	150.808	2.087	55.6022	0.144979	17.3911	0.930859	0.0064125	5.23713	0.0970126	6.81336	9.55121	3.51007	0.108547	0.607118	69.9
2000	1400	99.9982	292.571	-1.23588e+06	39.6189	150.808	2.087	55.6022	0.144979	17.3911	0.930859	0.0064125	5.23713	0.0970126	6.81336	9.55121	3.51007	0.108547	0.607118	69.9
2000	1399	99.9982	292.481	-1.23603e+06	39.616	150.808	2.091	55.6022	0.144979	17.3911	0.930966	0.0064125	5.23703	0.0970126	6.81336	9.55121	3.51006	0.108547	0.607118	69.9
2000	1398	99.9982	292.39	-1.23619e+06	39.6131	150.808	2.095	55.6022	0.144979	17.3911	0.931075	0.0064125	5.23693	0.0970126	6.81336	9.5512	3.51006	0.108547	0.607118	69.9
2000	1397	99.9982	292.3	-1.23634e+06	39.6102	150.808	2.099	55.6022	0.144979	17.3911	0.931185	0.0064125	5.23683	0.0970125	6.81336	9.5512	3.51006	0.108547	0.607118	69.9
2000	1396	99.9982	292.21	-1.23649e+06	39.6073	150.807	2.103	55.6022	0.144979	17.3911	0.931296	0.0064125	5.23673	0.0970125	6.81336	9.5512	3.51006	0.108547	0.607118	69.9
2000	1395	99.9982	292.12	-1.23664e+06	39.6044	150.807	2.107	55.6022	0.144979	17.3911	0.931408	0.00641249	5.23663	0.0970125	6.81335	9.5512	3.51006	0.108547	0.607118	69.9
2000	1394	99.9982	292.029	-1.23679e+06	39.6014	150.807	2.111	55.6022	0.144979	17.3911	0.931521	0.00641249	5.23653	0.0970125	6.81335	9.5512	3.51006	0.108547	0.607118	69.9
2000	1393	99.9982	291.939	-1.23694e+06	39.5985	150.807	2.115	55.6022	0.144979	17.3911	0.931636	0.00641249	5.23643	0.0970125	6.81335	9.5512	3.51006	0.108547	0.607118	69.9
2000	1392	99.9983	291.848	-1.23709e+06	39.5956	150.806	2.119	55.6022	0.144979	17.3911	0.931751	0.00641249	5.23632	0.0970125	6.81335	9.5512	3.51006	0.108547	0.607118	69.9
2000	1391	99.9983	291.758	-1.23724e+06	39.5927	150.806	2.122	55.6022	0.144979	17.3911	0.931868	0.00641249	5.23622	0.0970125	6.81335	9.5512	3.51006	0.108547	0.607118	69.9
2000	1390	99.9983	291.667	-1.23739e+06	39.5898	150.806	2.126	55.6022	0.144979	17.3911	0.931986	0.00641249	5.23611	0.0970125	6.81335	9.5512	3.51006	0.108547	0.607118	69.9
2000	1389	99.9983	291.576	-1.23754e+06	39.5869	150.806	2.13	55.6022	0.144979	17.3911	0.932104	0.00641249	5.236	0.0970125	6.81335	9.55119	3.51006	0.108547	0.607118	69.9
2000	1388	99.9983	291.486	-1.2377e+06	39.584	150.806	2.134	55.6022	0.144979	17.3911	0.932224	0.00641249	5.23589	0.0970124	6.81335	9.55119	3.51006	0.108547	0.607118	69.9
2000	1387	99.9983	291.395	-1.23785e+06	39.5811	150.805	2.138	55.6022	0.144979	17.391	0.932346	0.00641249	5.23578	0.0970124	6.81335	9.55119	3.51006	0.108547	0.607118	69.9
2000	1386	99.9983	291.304	-1.238e+06	39.5782	150.805	2.142	55.6021	0.144979	17.391	0.932468	0.00641249	5.23567	0.0970124	6.81335	9.55119	3.51006	0.108547	0.607118	69.9
2000	1385	99.9983	291.213	-1.23815e+06	39.5753	150.805	2.146	55.6021	0.144979	17.391	0.932591	0.00641249	5.23556	0.0970124	6.81335	9.55119	3.51006	0.108547	0.607117	69.9
2000	1384	99.9983	291.122	-1.2383e+06	39.5724	150.805	2.15	55.6021	0.144979	17.391	0.932716	0.00641249	5.23545	0.0970124	6.81335	9.55119	3.51006	0.108547	0.607117	69.9
2000	1383	99.9984	291.031	-1.23845e+06	39.5695	150.804	2.154	55.6021	0.144979	17.391	0.932842	0.00641249	5.23533	0.0970124	6.81334	9.55119	3.51006	0.108547	0.607117	69.9
2000	1382	99.9984	290.94	-1.2386e+06	39.5666	150.804	2.158	55.6021	0.144979	17.391	0.932968	0.00641248	5.23522	0.0970124	6.81334	9.55119	3.51006	0.108547	0.607117	69.9
2000	1381	99.9984	290.849	-1.23875e+06	39.5637	150.804	2.162	55.6021	0.144979	17.391	0.933096	0.00641248	5.2351	0.0970124	6.81334	9.55118	3.51006	0.108547	0.607117	69.9
2000	1380	99.9984	290.758	-1.2389e+06	39.5607	150.804	2.166	55.6021	0.144979	17.391	0.933226	0.00641248	5.23499	0.0970123	6.81334	9.55118	3.51006	0.108547	0.607117	69.9
2000	1379	99.9984	290.667	-1.23905e+06	39.5578	150.804	2.17	55.6021	0.144979	17.391	0.933356	0.00641248	5.23487	0.0970123	6.81334	9.55118	3.51006	0.108547	0.607117	69.9
2000	1378	99.9984	290.575	-1.2392e+06	39.5549	150.803	2.174	55.6021	0.144979	17.391	0.933487	0.00641248	5.23475	0.0970123	6.81334	9.55118	3.51006	0.108547	0.607117	69.9
2000	1377	99.9984	290.484	-1.23936e+06	39.552	150.803	2.178	55.6021	0.144979	17.391	0.93362	0.00641248	5.23463	0.0970123	6.81334	9.55118	3.51006	0.108547	0.607117	69.9
2000	1376	99.9985	290.393	-1.23951e+06	39.5491	150.803	2.182	55.6021	0.144979	17.391	0.933754	0.00641248	5.23451	0.0970123	6.81334	9.55118	3.51006	0.108547	0.607117	69.9
2000	1375	99.9985	290.301	-1.23966e+06	39.5462	150.803	2.186	55.6021	0.144979	17.391	0.933889	0.00641248	5.23438	0.0970123	6.81334	9.55118	3.51005	0.108547	0.607117	69.9
2000	1374	99.9985	290.21	-1.23981e+06	39.5433	150.802	2.19	55.6021	0.144979	17.391	0.934025	0.00641248	5.23426	0.0970123	6.81334	9.55118	3.51005	0.108547	0.607117	69.9
2000	1373	99.9985	290.118	-1.23996e+06	39.5404	150.802	2.194	55.6021	0.144979	17.391	0.934163	0.00641248	5.23414	0.0970123	6.81334	9.55117	3.51005	0.108547	0.607116	69.9
2000	1372	99.9985	290.026	-1.24011e+06	39.5375	150.802	2.198	55.602	0.144979	17.391	0.934301	0.00641248	5.23401	0.0970122	6.81333	9.55117	3.51005	0.108547	0.607116	69.9
2000	1371	99.9985	289.935	-1.24026e+06	39.5346	150.802	2.202	55.602	0.144979	17.391	0.934441	0.00641248	5.23388	0.0970122	6.81333	9.55117	3.51005	0.108547	0.607116	69.9
2000	1370	99.9985	289.843	-1.24041e+06	39.5317	150.802	2.206	55.602	0.144979	17.391	0.934582	0.00641247	5.23376	0.0970122	6.81333	9.55117	3.51005	0.108547	0.607116	69.9
2000	1369	99.9985	289.751	-1.24056e+06	39.5288	150.801	2.21	55.602	0.144979	17.391	0.934724	0.00641247	5.23363	0.0970122	6.81333	9.55117	3.51005	0.108547	0.607116	69.9
2000	1368	99.9986	289.66	-1.24071e+06	39.5259	150.801	2.214	55.602	0.144979	17.391	0.934867	0.00641247	5.2335	0.0970122	6.81333	9.55117	3.51005	0.108547	0.607116	69.9
2000	1367	99.9986	289.568	-1.24087e+06	39.523	150.801	2.218	55.602	0.144979	17.391	0.935012	0.00641247	5.23337	0.0970122	6.81333	9.55117	3.51005	0.108547	0.607116	69.9
2000	1366	99.9986	289.476	-1.24102e+06	39.5201	150.801	2.222	55.602	0.144979	17.391	0.935157	0.00641247	5.23324	0.0970122	6.81333	9.55117	3.51005	0.108547	0.607116	69.9
2000	1365	99.9986	289.384	-1.24117e+06	39.5172	150.8	2.226	55.602	0.144979	17.391	0.935304	0.00641247	5.2331	0.0970121	6.81333	9.55116	3.51005	0.108547	0.607116	69.9
2000	1364	99.9986	289.292	-1.24132e+06	39.5143	150.8	2.23	55.602	0.144979	17.391	0.935453	0.00641247	5.23297	0.0970121	6.81333	9.55116	3.51005	0.108547	0.607116	69.9
2000	1363	99.9986	289.2	-1.24147e+06	39.5114	150.8	2.234	55.602	0.144979	17.391	0.935602	0.00641247	5.23283	0.0970121	6.81333	9.55116	3.51005	0.108547	0.607116	69.9
2000	1362	99.9987	289.107	-1.24162e+06	39.5085	150.8	2.238	55.602	0.144979	17.391	0.935752	0.00641247	5.2327	0.0970121	6.81332	9.55116	3.51005	0.108547	0.607116	69.9
2000	1361	99.9987	289.015	-1.24177e+06	39.5056	150.8	2.242	55.602	0.144979	17.391	0.935904	0.00641247	5.23256	0.0970121	6.81332	9.55116	3.51005	0.108546	0.607115	69.9
2000	1360	99.9987	288.923	-1.24192e+06	39.5027	150.799	2.246	55.6019	0.144979	17.391	0.936057	0.00641246	5.23242	0.0970121	6.81332	9.55116	3.51005	0.108546	0.607115	69.9
2000	1359	99.9987	288.831	-1.24207e+06	39.4998	150.799	2.251	55.6019	0.144979	17.391	0.936211	0.00641246	5.23228	0.0970121	6.81332	9.55115	3.51005	0.108546	0.607115	69.9
2000	1358	99.9987	288.738	-1.24222e+06	39.4969	150.799	2.255	55.6019	0.144978	17.391	0.936367	0.00641246	5.23214	0.097012	6.81332	9.55115	3.51005	0.108546	0.607115	69.9
2000	1357	99.9987	288.646	-1.24238e+06	39.494	150.799	2.259	55.6019	0.144978	17.391	0.936524	0.00641246	5.232	0.097012	6.81332	9.55115	3.51005	0.108546	0.607115	69.9
2000	1356	99.9987	288.553	-1.24253e+06	39.4911	150.799	2.263	55.6019	0.144978	17.391	0.936682	0.00641246	5.23185	0.097012	6.81332	9.55115	3.51004	0.108546	0.607115	69.9
2000	1355	99.9988	288.461	-1.24268e+06	39.4882	150.798	2.267	55.6019	0.144978	17.391	0.936841	0.00641246	5.23171	0.097012	6.81332	9.55115	3.51004	0.108546	0.607115	69.9
2000	1354	99.9988	288.368	-1.24283e+06	39.4853	150.798	2.271	55.6019	0.144978	17.391	0.937001	0.00641246	5.23157	0.097012	6.81332	9.55115	3.51004	0.108546	0.607115	69.9
2000	1353	99.9988	288.275	-1.24298e+06	39.4824	150.798	2.275	55.6019	0.144978	17.391	0.937163	0.00641246	5.23142	0.097012	6.81332	9.55115	3.51004	0.108546	0.607115	69.9
2000	1352	99.9988	288.183	-1.24313e+06	39.4795	150.798	2.279	55.6019	0.144978	17.391	0.937326	0.00641246	5.23127	0.097012	6.81331	9.55114	3.51004	0.108546	0.607115	69.9
2000	1351	99.9988	288.09	-1.24328e+06	39.4766	150.798	2.283	55.6019	0.144978	17.391	0.93749	0.00641246	5.23112	0.0970119	6.81331	9.55114	3.51004	0.108546	0.607114	69.9
2000	1350	99.9988	287.997	-1.24343e+06	39.4737	150.797	2.287	55.6019	0.144978	17.391	0.937655	0.00641245	5.23097	0.0970119	6.81331	9.55114	3.51004	0.108546	0.607114	69.9
2000	1349	99.9989	287.904	-1.24358e+06	39.4708	150.797	2.292	55.6018	0.144978	17.391	0.937822	0.00641245	5.23082	0.0970119	6.81331	9.55114	3.51004	0.108546	0.607114	69.9
2000	1348	99.9989	287.811	-1.24374e+06	39.4679	150.797	2.296	55.6018	0.144978	17.391	0.93799	0.00641245	5.23067	0.0970119	6.81331	9.55114	3.51004	0.108546	0.607114	69.9
2000	1347	99.9989	287.718	-1.24389e+06	39.465	150.797	2.3	55.6018	0.144978	17.3909	0.938159	0.00641245	5.23052	0.0970119	6.81331	9.55114	3.51004	0.108546	0.607114	69.9
2000	1346	99.9989	287.625	-1.24404e+06	39.4621	150.797	2.304	55.6018	0.144978	17.3909	0.938329	0.00641245	5.23036	0.0970119	6.81331	9.55113	3.51004	0.108546	0.607114	69.9
2000	1345	99.9989	287.532	-1.24419e+06	39.4592	150.796	2.308	55.6018	0.144978	17.3909	0.938501	0.00641245	5.23021	0.0970118	6.81331	9.55113	3.51004	0.108546	0.607114	69.9
2000	1344	99.9989	287.439	-1.24434e+06	39.4563	150.796	2.312	55.6018	0.144978	17.3909	0.938674	0.00641245	5.23005	0.0970118	6.8133	9.55113	3.51004	0.108546	0.607114	69.9
2000	1343	99.999	287.346	-1.24449e+06	39.4534	150.796	2.316	55.6018	0.144978	17.3909	0.938848	0.00641245	5.22989	0.0970118	6.8133	9.55113	3.51004	0.108546	0.607114	69.9
2000	1342	99.999	287.252	-1.24464e+06	39.4505	150.796	2.321	55.6018	0.144978	17.3909	0.939024	0.00641245	5.22973	0.0970118	6.8133	9.55113	3.51004	0.108546	0.607114	69.9
2000	1341	99.999	287.159	-1.24479e+06	39.4476	150.796	2.325	55.6018	0.144978	17.3909	0.939201	0.00641244	5.22957	0.0970118	6.8133	9.55113	3.51004	0.108546	0.607113	69.9
2000	1340	99.999	287.066	-1.24494e+06	39.4447	150.795	2.329	55.6018	0.144978	17.3909	0.939379	0.00641244	5.22941	0.0970118	6.8133	9.55112	3.51004	0.108546	0.607113	69.9
2000	1339	99.999	286.972	-1.24509e+06	39.4418	150.795	2.333	55.6018	0.144978	17.3909	0.939559	0.00641244	5.22925	0.0970117	6.8133	9.55112	3.51003	0.108546	0.607113	69.9
2000	1338	99.9991	286.879	-1.24525e+06	39.4389	150.795	2.337	55.6017	0.144978	17.3909	0.939739	0.00641244	5.22908	0.0970117	6.8133	9.55112	3.51003	0.108546	0.607113	69.9
2000	1337	99.9991	286.785	-1.2454e+06	39.436	150.795	2.342	55.6017	0.144978	17.3909	0.939921	0.00641244	5.22892	0.0970117	6.8133	9.55112	3.51003	0.108546	0.607113	69.9
2000	1336	99.9991	286.691	-1.24555e+06	39.4331	150.795	2.346	55.6017	0.144978	17.3909	0.940105	0.00641244	5.22875	0.0970117	6.81329	9.55112	3.51003	0.108546	0.607113	69.9
2000	1335	99.9991	286.598	-1.2457e+06	39.4302	150.795	2.35	55.6017	0.144978	17.3909	0.940289	0.00641244	5.22859	0.0970117	6.81329	9.55112	3.51003	0.108546	0.607113	69.9
2000	1334	99.9991	286.504	-1.24585e+06	39.4273	150.794	2.354	55.6017	0.144978	17.3909	0.940475	0.00641244	5.22842	0.0970116	6.81329	9.55111	3.51003	0.108546	0.607113	69.9
2000	1333	99.9991	286.41	-1.246e+06	39.4244	150.794	2.358	55.6017	0.144978	17.3909	0.940663	0.00641244	5.22825	0.0970116	6.81329	9.55111	3.51003	0.108546	0.607113	69.9
2000	1332	99.9992	286.316	-1.24615e+06	39.4215	150.794	2.363	55.6017	0.144978	17.3909	0.940851	0.00641243	5.22808	0.0970116	6.81329	9.55111	3.51003	0.108546	0.607112	69.9
2000	1331	99.9992	286.222	-1.2463e+06	39.4186	150.794	2.367	55.6017	0.144978	17.3909	0.941041	0.00641243	5.22791	0.0970116	6.81329	9.55111	3.51003	0.108546	0.607112	69.9
2000	1330	99.9992	286.128	-1.24645e+06	39.4157	150.794	2.371	55.6017	0.144978	17.3909	0.941232	0.00641243	5.22773	0.0970116	6.81329	9.55111	3.51003	0.108546	0.607112	69.9
2000	1329	99.9992	286.034	-1.24661e+06	39.4128	150.793	2.375	55.6016	0.144978	17.3909	0.941425	0.00641243	5.22756	0.0970116	6.81329	9.55111	3.51003	0.108546	0.607112	69.9
2000	1328	99.9992	285.94	-1.24676e+06	39.4099	150.793	2.379	55.6016	0.144978	17.3909	0.941619	0.00641243	5.22738	0.0970115	6.81328	9.5511	3.51003	0.108546	0.607112	69.9
2000	1327	99.9993	285.846	-1.24691e+06	39.407	150.793	2.384	55.6016	0.144978	17.3909	0.941814	0.00641243	5.22721	0.0970115	6.81328	9.5511	3.51003	0.108546	0.607112	69.9
2000	1326	99.9993	285.752	-1.24706e+06	39.4041	150.793	2.388	55.6016	0.144978	17.3909	0.942011	0.00641243	5.22703	0.0970115	6.81328	9.5511	3.51003	0.108546	0.607112	69.9
2000	1325	99.9993	285.657	-1.24721e+06	39.4012	150.793	2.392	55.6016	0.144978	17.3909	0.942209	0.00641243	5.22685	0.0970115	6.81328	9.5511	3.51003	0.108546	0.607112	69.9
2000	1324	99.9993	285.563	-1.24736e+06	39.3983	150.793	2.396	55.6016	0.144978	17.3909	0.942408	0.00641242	5.22667	0.0970115	6.81328	9.5511	3.51002	0.108546	0.607111	69.9
2000	1323	99.9993	285.469	-1.24751e+06	39.3955	150.792	2.401	55.6016	0.144978	17.3909	0.942609	0.00641242	5.22649	0.0970114	6.81328	9.55109	3.51002	0.108546	0.607111	69.9
2000	1322	99.9994	285.374	-1.24766e+06	39.3926	150.792	2.405	55.6016	0.144978	17.3909	0.942811	0.00641242	5.2263	0.0970114	6.81328	9.55109	3.51002	0.108546	0.607111	69.9
2000	1321	99.9994	285.28	-1.24781e+06	39.3897	150.792	2.409	55.6016	0.144978	17.3909	0.943014	0.00641242	5.22612	0.0970114	6.81328	9.55109	3.51002	0.108546	0.607111	69.9
2000	1320	99.9994	285.185	-1.24796e+06	39.3868	150.792	2.414	55.6015	0.144977	17.3909	0.943219	0.00641242	5.22593	0.0970114	6.81327	9.55109	3.51002	0.108546	0.607111	69.9
2000	1319	99.9994	285.091	-1.24812e+06	39.3839	150.792	2.418	55.6015	0.144977	17.3909	0.943425	0.00641242	5.22575	0.0970114	6.81327	9.55109	3.51002	0.108546	0.607111	69.9
2000	1318	99.9994	284.996	-1.24827e+06	39.381	150.791	2.422	55.6015	0.144977	17.3909	0.943633	0.00641242	5.22556	0.0970113	6.81327	9.55108	3.51002	0.108546	0.607111	69.9
2000	1317	99.9995	284.901	-1.24842e+06	39.3781	150.791	2.426	55.6015	0.144977	17.3908	0.943841	0.00641241	5.22537	0.0970113	6.81327	9.55108	3.51002	0.108546	0.607111	69.9
2000	1316	99.9995	284.806	-1.24857e+06	39.3752	150.791	2.431	55.6015	0.144977	17.3908	0.944052	0.00641241	5.22518	0.0970113	6.81327	9.55108	3.51002	0.108546	0.60711	69.9
2000	1315	99.9995	284.711	-1.24872e+06	39.3723	150.791	2.435	55.6015	0.144977	17.3908	0.944263	0.00641241	5.22499	0.0970113	6.81327	9.55108	3.51002	0.108546	0.60711	69.9
2000	1314	99.9995	284.617	-1.24887e+06	39.3694	150.791	2.439	55.6015	0.144977	17.3908	0.944476	0.00641241	5.22479	0.0970113	6.81327	9.55108	3.51002	0.108546	0.60711	69.9
2000	1313	99.9995	284.522	-1.24902e+06	39.3665	150.791	2.444	55.6015	0.144977	17.3908	0.944691	0.00641241	5.2246	0.0970112	6.81326	9.55107	3.51002	0.108546	0.60711	69.9
2000	1312	99.9996	284.426	-1.24917e+06	39.3636	150.79	2.448	55.6015	0.144977	17.3908	0.944907	0.00641241	5.2244	0.0970112	6.81326	9.55107	3.51002	0.108546	0.60711	69.9
2000	1311	99.9996	284.331	-1.24932e+06	39.3608	150.79	2.452	55.6014	0.144977	17.3908	0.945124	0.00641241	5.22421	0.0970112	6.81326	9.55107	3.51002	0.108545	0.60711	69.9
2000	1310	99.9996	284.236	-1.24948e+06	39.3579	150.79	2.457	55.6014	0.144977	17.3908	0.945342	0.00641241	5.22401	0.0970112	6.81326	9.55107	3.51001	0.108545	0.60711	69.9
2000	1309	99.9996	284.141	-1.24963e+06	39.355	150.79	2.461	55.6014	0.144977	17.3908	0.945563	0.0064124	5.22381	0.0970111	6.81326	9.55107	3.51001	0.108545	0.60711	69.9
2000	1308	99.9997	284.046	-1.24978e+06	39.3521	150.79	2.465	55.6014	0.144977	17.3908	0.945784	0.0064124	5.22361	0.0970111	6.81326	9.55106	3.51001	0.108545	0.607109	69.9
2000	1307	99.9997	283.95	-1.24993e+06	39.3492	150.79	2.47	55.6014	0.144977	17.3908	0.946007	0.0064124	5.22341	0.0970111	6.81325	9.55106	3.51001	0.108545	0.607109	69.9
2000	1306	99.9997	283.855	-1.25008e+06	39.3463	150.789	2.474	55.6014	0.144977	17.3908	0.946231	0.0064124	5.2232	0.0970111	6.81325	9.55106	3.51001	0.108545	0.607109	69.9
2000	1305	99.9997	283.759	-1.25023e+06	39.3434	150.789	2.478	55.6014	0.144977	17.3908	0.946457	0.0064124	5.223	0.0970111	6.81325	9.55106	3.51001	0.108545	0.607109	69.9
2000	1304	99.9998	283.664	-1.25038e+06	39.3405	150.789	2.483	55.6014	0.144977	17.3908	0.946684	0.0064124	5.22279	0.097011	6.81325	9.55105	3.51001	0.108545	0.607109	69.9
2000	1303	99.9998	283.568	-1.25053e+06	39.3376	150.789	2.487	55.6013	0.144977	17.3908	0.946913	0.0064124	5.22259	0.097011	6.81325	9.55105	3.51001	0.108545	0.607109	69.9
2000	1302	99.9998	283.473	-1.25068e+06	39.3347	150.789	2.492	55.6013	0.144977	17.3908	0.947143	0.00641239	5.22238	0.097011	6.81325	9.55105	3.51001	0.108545	0.607109	69.9
2000	1301	99.9998	283.377	-1.25084e+06	39.3319	150.789	2.496	55.6013	0.144977	17.3908	0.947374	0.00641239	5.22217	0.097011	6.81325	9.55105	3.51001	0.108545	0.607108	69.9
2000	1300	99.9998	283.281	-1.25099e+06	39.329	150.788	2.5	55.6013	0.144977	17.3908	0.947607	0.00641239	5.22196	0.097011	6.81324	9.55105	3.51001	0.108545	0.607108	69.9
2000	1299	99.9999	283.185	-1.25114e+06	39.3261	150.788	2.505	55.6013	0.144977	17.3908	0.947841	0.00641239	5.22175	0.0970109	6.81324	9.55104	3.51001	0.108545	0.607108	69.9
2000	1298	99.9999	283.089	-1.25129e+06	39.3232	150.788	2.509	55.6013	0.144977	17.3908	0.948077	0.00641239	5.22153	0.0970109	6.81324	9.55104	3.51	0.108545	0.607108	69.9
2000	1297	99.9999	282.994	-1.25144e+06	39.3203	150.788	2.514	55.6013	0.144977	17.3908	0.948314	0.00641239	5.22132	0.0970109	6.81324	9.55104	3.51	0.108545	0.607108	69.9
2000	1296	99.9999	282.898	-1.25159e+06	39.3174	150.788	2.518	55.6013	0.144977	17.3908	0.948553	0.00641238	5.2211	0.0970109	6.81324	9.55104	3.51	0.108545	0.607108	69.9
2000	1295	100	282.801	-1.25174e+06	39.3145	150.788	2.522	55.6012	0.144977	17.3908	0.948793	0.00641238	5.22088	0.0970108	6.81324	9.55103	3.51	0.108545	0.607108	69.9
2000	1294	100	282.705	-1.25189e+06	39.3116	150.787	2.527	55.6012	0.144977	17.3908	0.949035	0.00641238	5.22066	0.0970108	6.81323	9.55103	3.51	0.108545	0.607107	69.9
2000	1293	100	282.609	-1.25204e+06	39.3088	150.787	2.531	55.6012	0.144977	17.3908	0.949278	0.00641238	5.22044	0.0970108	6.81323	9.55103	3.51	0.108545	0.607107	69.9
2000	1292	100	282.513	-1.2522e+06	39.3059	150.787	2.536	55.6012	0.144977	17.3907	0.949523	0.00641238	5.22022	0.0970108	6.81323	9.55103	3.51	0.108545	0.607107	69.9
2000	1291	100	282.417	-1.25235e+06	39.303	150.787	2.54	55.6012	0.144977	17.3907	0.949769	0.00641238	5.22	0.0970107	6.81323	9.55103	3.51	0.108545	0.607107	69.9
2000	1290	100	282.32	-1.2525e+06	39.3001	150.787	2.545	55.6012	0.144976	17.3907	0.950017	0.00641238	5.21977	0.0970107	6.81323	9.55102	3.51	0.108545	0.607107	69.9
2000	1289	100	282.224	-1.25265e+06	39.2972	150.787	2.549	55.6012	0.144976	17.3907	0.950266	0.00641237	5.21955	0.0970107	6.81323	9.55102	3.51	0.108545	0.607107	69.9
2000	1288	100	282.127	-1.2528e+06	39.2943	150.787	2.553	55.6011	0.144976	17.3907	0.950516	0.00641237	5.21932	0.0970107	6.81322	9.55102	3.51	0.108545	0.607107	69.9
2000	1287	100	282.031	-1.25295e+06	39.2914	150.786	2.558	55.6011	0.144976	17.3907	0.950768	0.00641237	5.21909	0.0970106	6.81322	9.55102	3.51	0.108545	0.607106	69.9
2000	1286	100	281.934	-1.2531e+06	39.2886	150.786	2.562	55.6011	0.144976	17.3907	0.951022	0.00641237	5.21886	0.0970106	6.81322	9.55101	3.50999	0.108545	0.607106	69.9
2000	1285	100	281.837	-1.25325e+06	39.2857	150.786	2.567	55.6011	0.144976	17.3907	0.951277	0.00641237	5.21863	0.0970106	6.81322	9.55101	3.50999	0.108545	0.607106	69.9
2000	1284	100	281.741	-1.2534e+06	39.2828	150.786	2.571	55.6011	0.144976	17.3907	0.951534	0.00641237	5.2184	0.0970106	6.81322	9.55101	3.50999	0.108545	0.607106	69.9
2000	1283	100	281.644	-1.25356e+06	39.2799	150.786	2.576	55.6011	0.144976	17.3907	0.951792	0.00641236	5.21817	0.0970105	6.81322	9.55101	3.50999	0.108545	0.607106	69.9
2000	1282	100	281.547	-1.25371e+06	39.277	150.786	2.58	55.6011	0.144976	17.3907	0.952052	0.00641236	5.21793	0.0970105	6.81321	9.551	3.50999	0.108545	0.607106	69.9
2000	1281	100	281.45	-1.25386e+06	39.2741	150.786	2.585	55.601	0.144976	17.3907	0.952313	0.00641236	5.21769	0.0970105	6.81321	9.551	3.50999	0.108545	0.607105	69.9
2000	1280	100	281.353	-1.25401e+06	39.2713	150.785	2.589	55.601	0.144976	17.3907	0.952576	0.00641236	5.21746	0.0970105	6.81321	9.551	3.50999	0.108545	0.607105	69.9
2000	1279	100	281.256	-1.25416e+06	39.2684	150.785	2.594	55.601	0.144976	17.3907	0.95284	0.00641236	5.21722	0.0970104	6.81321	9.551	3.50999	0.108545	0.607105	69.9
2000	1278	100	281.159	-1.25431e+06	39.2655	150.785	2.598	55.601	0.144976	17.3907	0.953106	0.00641236	5.21698	0.0970104	6.81321	9.55099	3.50999	0.108545	0.607105	69.9
2000	1277	100	281.062	-1.25446e+06	39.2626	150.785	2.603	55.601	0.144976	17.3907	0.953373	0.00641235	5.21673	0.0970104	6.8132	9.55099	3.50999	0.108545	0.607105	69.9
2000	1276	100	280.964	-1.25461e+06	39.2597	150.785	2.607	55.601	0.144976	17.3907	0.953642	0.00641235	5.21649	0.0970104	6.8132	9.55099	3.50999	0.108545	0.607105	69.9
2000	1275	100	280.867	-1.25477e+06	39.2568	150.785	2.612	55.601	0.144976	17.3907	0.953913	0.00641235	5.21624	0.0970103	6.8132	9.55099	3.50998	0.108545	0.607104	69.9
2000	1274	100.001	280.77	-1.25492e+06	39.254	150.785	2.616	55.6009	0.144976	17.3907	0.954185	0.00641235	5.216	0.0970103	6.8132	9.55098	3.50998	0.108545	0.607104	70
2000	1273	100.001	280.672	-1.25507e+06	39.2511	150.784	2.621	55.6009	0.144976	17.3907	0.954459	0.00641235	5.21575	0.0970103	6.8132	9.55098	3.50998	0.108544	0.607104	70
2000	1272	100.001	280.575	-1.25522e+06	39.2482	150.784	2.626	55.6009	0.144976	17.3907	0.954734	0.00641234	5.2155	0.0970103	6.8132	9.55098	3.50998	0.108544	0.607104	70
2000	1271	100.001	280.477	-1.25537e+06	39.2453	150.784	2.63	55.6009	0.144976	17.3907	0.955011	0.00641234	5.21525	0.0970102	6.81319	9.55097	3.50998	0.108544	0.607104	70
2000	1270	100.001	280.38	-1.25552e+06	39.2424	150.784	2.635	55.6009	0.144976	17.3906	0.955289	0.00641234	5.215	0.0970102	6.81319	9.55097	3.50998	0.108544	0.607104	70
2000	1269	100.001	280.282	-1.25567e+06	39.2396	150.784	2.639	55.6009	0.144976	17.3906	0.955569	0.00641234	5.21474	0.0970102	6.81319	9.55097	3.50998	0.108544	0.607103	70
2000	1268	100.001	280.184	-1.25582e+06	39.2367	150.784	2.644	55.6008	0.144976	17.3906	0.955851	0.00641234	5.21449	0.0970101	6.81319	9.55097	3.50998	0.108544	0.607103	70
2000	1267	100.001	280.086	-1.25597e+06	39.2338	150.784	2.648	55.6008	0.144976	17.3906	0.956134	0.00641234	5.21423	0.0970101	6.81319	9.55096	3.50998	0.108544	0.607103	70
2000	1266	100.001	279.988	-1.25613e+06	39.2309	150.784	2.653	55.6008	0.144976	17.3906	0.956418	0.00641233	5.21398	0.0970101	6.81318	9.55096	3.50998	0.108544	0.607103	70
2000	1265	100.001	279.891	-1.25628e+06	39.228	150.783	2.658	55.6008	0.144976	17.3906	0.956705	0.00641233	5.21372	0.0970101	6.81318	9.55096	3.50997	0.108544	0.607103	70
2000	1264	100.001	279.793	-1.25643e+06	39.2252	150.783	2.662	55.6008	0.144975	17.3906	0.956993	0.00641233	5.21345	0.09701	6.81318	9.55096	3.50997	0.108544	0.607103	70
2000	1263	100.001	279.694	-1.25658e+06	39.2223	150.783	2.667	55.6008	0.144975	17.3906	0.957282	0.00641233	5.21319	0.09701	6.81318	9.55095	3.50997	0.108544	0.607102	70
2000	1262	100.001	279.596	-1.25673e+06	39.2194	150.783	2.671	55.6007	0.144975	17.3906	0.957574	0.00641233	5.21293	0.09701	6.81318	9.55095	3.50997	0.108544	0.607102	70
2000	1261	100.001	279.498	-1.25688e+06	39.2165	150.783	2.676	55.6007	0.144975	17.3906	0.957866	0.00641232	5.21266	0.09701	6.81317	9.55095	3.50997	0.108544	0.607102	70
2000	1260	100.001	279.4	-1.25703e+06	39.2137	150.783	2.681	55.6007	0.144975	17.3906	0.958161	0.00641232	5.2124	0.0970099	6.81317	9.55094	3.50997	0.108544	0.607102	70
2000	1259	100.001	279.302	-1.25718e+06	39.2108	150.783	2.685	55.6007	0.144975	17.3906	0.958457	0.00641232	5.21213	0.0970099	6.81317	9.55094	3.50997	0.108544	0.607102	70
2000	1258	100.001	279.203	-1.25734e+06	39.2079	150.783	2.69	55.6007	0.144975	17.3906	0.958755	0.00641232	5.21186	0.0970099	6.81317	9.55094	3.50997	0.108544	0.607102	70
2000	1257	100.001	279.105	-1.25749e+06	39.205	150.782	2.695	55.6007	0.144975	17.3906	0.959054	0.00641232	5.21159	0.0970098	6.81317	9.55094	3.50997	0.108544	0.607101	70
2000	1256	100.001	279.006	-1.25764e+06	39.2021	150.782	2.699	55.6006	0.144975	17.3906	0.959355	0.00641232	5.21131	0.0970098	6.81316	9.55093	3.50996	0.108544	0.607101	70
2000	1255	100.001	278.908	-1.25779e+06	39.1993	150.782	2.704	55.6006	0.144975	17.3906	0.959658	0.00641231	5.21104	0.0970098	6.81316	9.55093	3.50996	0.108544	0.607101	70
2000	1254	100.001	278.809	-1.25794e+06	39.1964	150.782	2.708	55.6006	0.144975	17.3906	0.959962	0.00641231	5.21076	0.0970097	6.81316	9.55093	3.50996	0.108544	0.607101	70
2000	1253	100.001	278.71	-1.25809e+06	39.1935	150.782	2.713	55.6006	0.144975	17.3906	0.960268	0.00641231	5.21049	0.0970097	6.81316	9.55092	3.50996	0.108544	0.607101	70
2000	1252	100.001	278.612	-1.25824e+06	39.1906	150.782	2.718	55.6006	0.144975	17.3906	0.960576	0.00641231	5.21021	0.0970097	6.81316	9.55092	3.50996	0.108544	0.6071	70
2000	1251	100.001	278.513	-1.25839e+06	39.1878	150.782	2.722	55.6006	0.144975	17.3906	0.960885	0.00641231	5.20993	0.0970097	6.81315	9.55092	3.50996	0.108544	0.6071	70
2000	1250	100.001	278.414	-1.25855e+06	39.1849	150.782	2.727	55.6005	0.144975	17.3905	0.961197	0.0064123	5.20965	0.0970096	6.81315	9.55092	3.50996	0.108544	0.6071	70
2000	1249	100.001	278.315	-1.2587e+06	39.182	150.781	2.732	55.6005	0.144975	17.3905	0.961509	0.0064123	5.20936	0.0970096	6.81315	9.55091	3.50996	0.108544	0.6071	70
2000	1248	100.001	278.216	-1.25885e+06	39.1791	150.781	2.737	55.6005	0.144975	17.3905	0.961824	0.0064123	5.20908	0.0970096	6.81315	9.55091	3.50996	0.108544	0.6071	70
2000	1247	100.001	278.117	-1.259e+06	39.1763	150.781	2.741	55.6005	0.144975	17.3905	0.96214	0.0064123	5.20879	0.0970095	6.81314	9.55091	3.50996	0.108544	0.607099	70
2000	1246	100.001	278.018	-1.25915e+06	39.1734	150.781	2.746	55.6005	0.144975	17.3905	0.962458	0.0064123	5.2085	0.0970095	6.81314	9.5509	3.50995	0.108544	0.607099	70
2000	1245	100.001	277.918	-1.2593e+06	39.1705	150.781	2.751	55.6005	0.144975	17.3905	0.962777	0.00641229	5.20821	0.0970095	6.81314	9.5509	3.50995	0.108544	0.607099	70
2000	1244	100.001	277.819	-1.25945e+06	39.1676	150.781	2.755	55.6004	0.144975	17.3905	0.963099	0.00641229	5.20792	0.0970094	6.81314	9.5509	3.50995	0.108544	0.607099	70
2000	1243	100.001	277.72	-1.2596e+06	39.1648	150.781	2.76	55.6004	0.144975	17.3905	0.963422	0.00641229	5.20763	0.0970094	6.81314	9.55089	3.50995	0.108543	0.607099	70
2000	1242	100.001	277.62	-1.25976e+06	39.1619	150.781	2.765	55.6004	0.144975	17.3905	0.963746	0.00641229	5.20734	0.0970094	6.81313	9.55089	3.50995	0.108543	0.607098	70
2000	1241	100.001	277.521	-1.25991e+06	39.159	150.781	2.77	55.6004	0.144974	17.3905	0.964073	0.00641228	5.20704	0.0970093	6.81313	9.55089	3.50995	0.108543	0.607098	70
2000	1240	100.002	277.421	-1.26006e+06	39.1562	150.78	2.774	55.6004	0.144974	17.3905	0.964401	0.00641228	5.20674	0.0970093	6.81313	9.55088	3.50995	0.108543	0.607098	70
2000	1239	100.002	277.322	-1.26021e+06	39.1533	150.78	2.779	55.6003	0.144974	17.3905	0.964731	0.00641228	5.20644	0.0970093	6.81313	9.55088	3.50995	0.108543	0.607098	70
2000	1238	100.002	277.222	-1.26036e+06	39.1504	150.78	2.784	55.6003	0.144974	17.3905	0.965063	0.00641228	5.20614	0.0970093	6.81312	9.55088	3.50994	0.108543	0.607098	70
2000	1237	100.002	277.122	-1.26051e+06	39.1475	150.78	2.789	55.6003	0.144974	17.3905	0.965396	0.00641228	5.20584	0.0970092	6.81312	9.55088	3.50994	0.108543	0.607097	70
2000	1236	100.002	277.022	-1.26066e+06	39.1447	150.78	2.793	55.6003	0.144974	17.3905	0.965731	0.00641227	5.20554	0.0970092	6.81312	9.55087	3.50994	0.108543	0.607097	70
2000	1235	100.002	276.922	-1.26081e+06	39.1418	150.78	2.798	55.6003	0.144974	17.3905	0.966068	0.00641227	5.20523	0.0970092	6.81312	9.55087	3.50994	0.108543	0.607097	70
2000	1234	100.002	276.823	-1.26097e+06	39.1389	150.78	2.803	55.6003	0.144974	17.3905	0.966407	0.00641227	5.20493	0.0970091	6.81312	9.55087	3.50994	0.108543	0.607097	70
2000	1233	100.002	276.723	-1.26112e+06	39.1361	150.78	2.808	55.6002	0.144974	17.3904	0.966747	0.00641227	5.20462	0.0970091	6.81311	9.55086	3.50994	0.108543	0.607097	70
2000	1232	100.002	276.622	-1.26127e+06	39.1332	150.78	2.813	55.6002	0.144974	17.3904	0.96709	0.00641227	5.20431	0.0970091	6.81311	9.55086	3.50994	0.108543	0.607096	70
2000	1231	100.002	276.522	-1.26142e+06	39.1303	150.78	2.817	55.6002	0.144974	17.3904	0.967434	0.00641226	5.204	0.097009	6.81311	9.55086	3.50994	0.108543	0.607096	70
2000	1230	100.002	276.422	-1.26157e+06	39.1274	150.779	2.822	55.6002	0.144974	17.3904	0.96778	0.00641226	5.20368	0.097009	6.81311	9.55085	3.50994	0.108543	0.607096	70
2000	1229	100.002	276.322	-1.26172e+06	39.1246	150.779	2.827	55.6002	0.144974	17.3904	0.968127	0.00641226	5.20337	0.097009	6.8131	9.55085	3.50993	0.108543	0.607096	70
2000	1228	100.002	276.221	-1.26187e+06	39.1217	150.779	2.832	55.6001	0.144974	17.3904	0.968477	0.00641226	5.20305	0.0970089	6.8131	9.55085	3.50993	0.108543	0.607096	70
2000	1227	100.002	276.121	-1.26202e+06	39.1188	150.779	2.837	55.6001	0.144974	17.3904	0.968828	0.00641225	5.20273	0.0970089	6.8131	9.55084	3.50993	0.108543	0.607095	70
2000	1226	100.002	276.021	-1.26218e+06	39.116	150.779	2.841	55.6001	0.144974	17.3904	0.969181	0.00641225	5.20241	0.0970089	6.8131	9.55084	3.50993	0.108543	0.607095	70
2000	1225	100.002	275.92	-1.26233e+06	39.1131	150.779	2.846	55.6001	0.144974	17.3904	0.969536	0.00641225	5.20209	0.0970088	6.81309	9.55084	3.50993	0.108543	0.607095	70
2000	1224	100.002	275.819	-1.26248e+06	39.1102	150.779	2.851	55.6001	0.144974	17.3904	0.969893	0.00641225	5.20177	0.0970088	6.81309	9.55083	3.50993	0.108543	0.607095	70
2000	1223	100.002	275.719	-1.26263e+06	39.1074	150.779	2.856	55.6	0.144974	17.3904	0.970251	0.00641224	5.20144	0.0970087	6.81309	9.55083	3.50993	0.108543	0.607095	70
2000	1222	100.002	275.618	-1.26278e+06	39.1045	150.779	2.861	55.6	0.144974	17.3904	0.970612	0.00641224	5.20112	0.0970087	6.81309	9.55083	3.50993	0.108543	0.607094	70
2000	1221	100.002	275.517	-1.26293e+06	39.1016	150.779	2.866	55.6	0.144973	17.3904	0.970974	0.00641224	5.20079	0.0970087	6.81308	9.55082	3.50992	0.108543	0.607094	70
2000	1220	100.002	275.416	-1.26308e+06	39.0988	150.779	2.871	55.6	0.144973	17.3904	0.971338	0.00641224	5.20046	0.0970086	6.81308	9.55082	3.50992	0.108543	0.607094	70
2000	1219	100.002	275.315	-1.26323e+06	39.0959	150.778	2.875	55.6	0.144973	17.3904	0.971704	0.00641224	5.20013	0.0970086	6.81308	9.55082	3.50992	0.108543	0.607094	70
2000	1218	100.002	275.214	-1.26339e+06	39.093	150.778	2.88	55.5999	0.144973	17.3904	0.972072	0.00641223	5.19979	0.0970086	6.81308	9.55081	3.50992	0.108543	0.607093	70
2000	1217	100.002	275.113	-1.26354e+06	39.0902	150.778	2.885	55.5999	0.144973	17.3903	0.972441	0.00641223	5.19946	0.0970085	6.81307	9.55081	3.50992	0.108543	0.607093	70
2000	1216	100.002	275.012	-1.26369e+06	39.0873	150.778	2.89	55.5999	0.144973	17.3903	0.972813	0.00641223	5.19912	0.0970085	6.81307	9.5508	3.50992	0.108542	0.607093	70
2000	1215	100.002	274.911	-1.26384e+06	39.0844	150.778	2.895	55.5999	0.144973	17.3903	0.973186	0.00641223	5.19878	0.0970085	6.81307	9.5508	3.50992	0.108542	0.607093	70
2000	1214	100.002	274.81	-1.26399e+06	39.0816	150.778	2.9	55.5999	0.144973	17.3903	0.973562	0.00641222	5.19844	0.0970084	6.81307	9.5508	3.50991	0.108542	0.607092	70
2000	1213	100.002	274.708	-1.26414e+06	39.0787	150.778	2.905	55.5998	0.144973	17.3903	0.973939	0.00641222	5.1981	0.0970084	6.81306	9.55079	3.50991	0.108542	0.607092	70
2000	1212	100.003	274.607	-1.26429e+06	39.0759	150.778	2.91	55.5998	0.144973	17.3903	0.974318	0.00641222	5.19776	0.0970084	6.81306	9.55079	3.50991	0.108542	0.607092	70
2000	1211	100.003	274.505	-1.26445e+06	39.073	150.778	2.915	55.5998	0.144973	17.3903	0.974699	0.00641222	5.19741	0.0970083	6.81306	9.55079	3.50991	0.108542	0.607092	70
2000	1210	100.003	274.404	-1.2646e+06	39.0701	150.778	2.92	55.5998	0.144973	17.3903	0.975082	0.00641221	5.19707	0.0970083	6.81306	9.55078	3.50991	0.108542	0.607092	70
2000	1209	100.003	274.302	-1.26475e+06	39.0673	150.778	2.925	55.5998	0.144973	17.3903	0.975467	0.00641221	5.19672	0.0970082	6.81305	9.55078	3.50991	0.108542	0.607091	70
2000	1208	100.003	274.201	-1.2649e+06	39.0644	150.778	2.93	55.5997	0.144973	17.3903	0.975854	0.00641221	5.19637	0.0970082	6.81305	9.55078	3.50991	0.108542	0.607091	70
2000	1207	100.003	274.099	-1.26505e+06	39.0615	150.778	2.935	55.5997	0.144973	17.3903	0.976242	0.00641221	5.19602	0.0970082	6.81305	9.55077	3.50991	0.108542	0.607091	70
2000	1206	100.003	274	-1.2652e+06	39.0587	146.192	2.939	55.5997	0.144973	17.3903	0.976633	0.0064122	5.19566	0.0970081	6.81305	9.55077	3.5099	0.108542	0.607091	70
2000	1205	100.003	273.901	-1.26535e+06	39.0558	146.191	2.944	55.5997	0.144973	17.3903	0.977026	0.0064122	5.19531	0.0970081	6.81304	9.55076	3.5099	0.108542	0.60709	70
2000	1204	100.003	273.802	-1.26549e+06	39.053	146.19	2.949	55.5996	0.144973	17.3903	0.97742	0.0064122	5.19495	0.0970081	6.81304	9.55076	3.5099	0.108542	0.60709	70
2000	1203	100.003	273.703	-1.26564e+06	39.0501	146.189	2.954	55.5996	0.144972	17.3903	0.977817	0.0064122	5.19459	0.097008	6.81304	9.55076	3.5099	0.108542	0.60709	70
2000	1202	100.003	273.604	-1.26579e+06	39.0472	146.188	2.959	55.5996	0.144972	17.3902	0.978215	0.00641219	5.19423	0.097008	6.81303	9.55075	3.5099	0.108542	0.60709	70
2000	1201	100.003	273.505	-1.26593e+06	39.0444	146.186	2.964	55.5996	0.144972	17.3902	0.978615	0.00641219	5.19387	0.0970079	6.81303	9.55075	3.5099	0.108542	0.607089	70
2000	1200	100.003	273.406	-1.26608e+06	39.0415	146.185	2.969	55.5996	0.144972	17.3902	0.979018	0.00641219	5.1935	0.0970079	6.81303	9.55074	3.5099	0.108542	0.607089	70
2000	1199	99.7054	272.507	-1.26251e+06	38.9314	145.702	2.981	55.6003	0.145364	17.4349	0.978678	0.00643133	5.18361	0.0972974	6.74202	9.57333	3.5203	0.108866	0.608901	69.9
2000	1198	99.5701	272.045	-1.26096e+06	38.8798	145.482	2.988	55.6006	0.145544	17.4553	0.978737	0.00644007	5.17886	0.0974297	6.70963	9.58362	3.52506	0.109014	0.609729	69.8
2000	1197	99.4352	271.584	-1.25943e+06	38.8284	145.263	2.996	55.601	0.145722	17.4757	0.97879	0.0064488	5.17408	0.0975618	6.67733	9.59387	3.52981	0.109162	0.610555	69.7
2000	1196	99.301	271.125	-1.2579e+06	38.7771	145.045	3.004	55.6013	0.145901	17.4961	0.97884	0.00645752	5.16927	0.0976937	6.64512	9.6041	3.53455	0.109309	0.611381	69.6
2000	1195	97.9709	267.47	-1.24062e+06	38.2695	143.029	3.011	55.6558	0.147819	17.4323	0.986256	0.00654519	5.20056	0.09902	6.59598	9.58994	3.55542	0.110679	0.619681	69.3
2000	1194	96.7043	263.987	-1.22418e+06	37.786	141.109	3.019	55.7087	0.149695	17.3709	0.993463	0.00663091	5.23071	0.100317	6.5476	9.57649	3.57575	0.112017	0.627797	69
2000	1193	95.4709	260.595	-1.20818e+06	37.3152	139.24	3.026	55.7613	0.151569	17.3096	1.00064	0.00671658	5.2606	0.101613	6.49958	9.56315	3.59593	0.113352	0.635908	68.8
2000	1192	94.2693	257.291	-1.19259e+06	36.8564	137.42	3.033	55.8137	0.153442	17.2487	1.00778	0.0068022	5.29021	0.102908	6.45191	9.54994	3.61596	0.114685	0.644014	68.5
2000	1191	93.0983	254.07	-1.1774e+06	36.4094	135.646	3.041	55.8658	0.155313	17.188	1.01488	0.00688775	5.31957	0.104203	6.40458	9.53684	3.63584	0.116015	0.652114	68.2
2000	1190	91.9568	250.93	-1.16259e+06	35.9735	133.918	3.048	55.9176	0.157183	17.1275	1.02196	0.00697325	5.34867	0.105496	6.35759	9.52384	3.65558	0.117343	0.660209	67.9
2000	1189	90.8437	247.868	-1.14816e+06	35.5485	132.233	3.055	55.9693	0.159052	17.0673	1.029	0.00705869	5.37751	0.106789	6.31093	9.51096	3.67517	0.118668	0.668299	67.7
2000	1188	89.7579	244.881	-1.13409e+06	35.1338	130.589	3.062	56.0206	0.16092	17.0073	1.03602	0.00714408	5.4061	0.10808	6.2646	9.49818	3.69463	0.11999	0.676383	67.4
2000	1187	88.6985	241.967	-1.12036e+06	34.7292	128.986	3.069	56.0717	0.162786	16.9476	1.043	0.00722941	5.43445	0.109371	6.2186	9.48551	3.71395	0.12131	0.684462	67.1
2000	1186	87.6645	239.122	-1.10696e+06	34.3343	127.422	3.076	56.1226	0.164651	16.8881	1.04995	0.00731468	5.46254	0.110661	6.17291	9.47294	3.73314	0.122627	0.692535	66.8
2000	1185	86.655	236.344	-1.09388e+06	33.9487	125.895	3.083	56.1733	0.166515	16.8288	1.05687	0.0073999	5.49039	0.111951	6.12754	9.46047	3.75219	0.123942	0.700603	66.5
2000	1184	85.6691	233.631	-1.08111e+06	33.5721	124.405	3.09	56.2237	0.168377	16.7698	1.06376	0.00748506	5.518	0.113239	6.08248	9.44809	3.77112	0.125254	0.708665	66.3
2000	1183	84.706	230.981	-1.06864e+06	33.2042	122.949	3.097	56.2739	0.170238	16.711	1.07062	0.00757016	5.54538	0.114526	6.03773	9.4358	3.78991	0.126564	0.716723	66
2000	1182	83.6458	228.08	-1.05502e+06	32.8026	121.341	3.107	56.332	0.172205	16.6828	1.07636	0.00766611	5.57366	0.115978	5.98184	9.38859	3.81504	0.128061	0.725808	65.7
2000	1181	82.6034	225.229	-1.04164e+06	32.408	119.76	3.117	56.3904	0.174176	16.6572	1.08196	0.00776285	5.60178	0.117442	5.92554	9.33874	3.84049	0.129571	0.734967	65.3
2000	1180	81.5884	222.452	-1.02861e+06	32.0236	118.221	3.127	56.4485	0.17614	16.6314	1.08752	0.00785943	5.62965	0.118903	5.86982	9.28929	3.86572	0.131076	0.74411	65
2000	1179	80.5996	219.747	-1.01592e+06	31.6491	116.723	3.137	56.5064	0.178099	16.6054	1.09305	0.00795585	5.65725	0.120361	5.81467	9.24022	3.89072	0.132577	0.753239	64.7
2000	1178	79.6361	217.111	-1.00356e+06	31.2842	115.263	3.146	56.564	0.180052	16.5794	1.09853	0.00805211	5.68462	0.121818	5.76008	9.19154	3.9155	0.134073	0.762352	64.4
2000	1177	78.6968	214.541	-991512	30.9284	113.841	3.156	56.6213	0.182	16.5532	1.10398	0.00814821	5.71173	0.123272	5.70604	9.14324	3.94006	0.135566	0.771451	64
2000	1176	77.781	212.034	-979766	30.5813	112.454	3.166	56.6783	0.183942	16.5269	1.10939	0.00824415	5.73861	0.124723	5.65255	9.09532	3.9644	0.137054	0.780535	63.7
2000	1175	76.8876	209.589	-968310	30.2428	111.102	3.175	56.7351	0.185879	16.5005	1.11477	0.00833994	5.76525	0.126172	5.5996	9.04776	3.98852	0.138538	0.789603	63.4
2000	1174	76.016	207.202	-957134	29.9124	109.783	3.185	56.7915	0.18781	16.474	1.12012	0.00843557	5.79166	0.127619	5.54718	9.00057	4.01243	0.140018	0.798658	63.1
2000	1173	75.1652	204.873	-946228	29.5899	108.496	3.194	56.8477	0.189736	16.4473	1.12543	0.00853105	5.81784	0.129063	5.49528	8.95374	4.03613	0.141494	0.807697	62.7
2000	1172	74.3346	202.598	-935582	29.275	107.24	3.204	56.9037	0.191657	16.4205	1.1307	0.00862637	5.8438	0.130506	5.44391	8.90727	4.05962	0.142966	0.816722	62.4
2000	1171	73.5234	200.377	-925187	28.9674	106.013	3.213	56.9593	0.193573	16.3937	1.13595	0.00872155	5.86954	0.131945	5.39304	8.86115	4.08291	0.144434	0.825733	62.1
2000	1170	72.731	198.206	-915033	28.6668	104.816	3.222	57.0148	0.195483	16.3667	1.14116	0.00881657	5.89506	0.133383	5.34268	8.81539	4.10599	0.145898	0.83473	61.8
2000	1169	71.9354	196.03	-904881	28.3657	103.616	3.232	57.073	0.197444	16.3401	1.14566	0.00891408	5.91595	0.134858	5.29256	8.77051	4.12974	0.1474	0.843962	61.5
2000	1168	71.1525	193.888	-894893	28.0694	102.436	3.241	57.1312	0.199419	16.3126	1.15015	0.00901217	5.93651	0.136342	5.2423	8.72688	4.1534	0.148908	0.853248	61.1
2000	1167	70.3876	191.795	-885135	27.7798	101.283	3.251	57.1892	0.201388	16.285	1.15462	0.0091101	5.95688	0.137824	5.19255	8.68358	4.17686	0.150413	0.86252	60.8
2000	1166	69.6401	189.75	-875601	27.4967	100.157	3.26	57.247	0.203353	16.2573	1.15906	0.00920789	5.97705	0.139303	5.1433	8.64059	4.20012	0.151913	0.871779	60.5
2000	1165	68.9093	187.75	-866282	27.22	99.0561	3.269	57.3045	0.205312	16.2296	1.16348	0.00930554	5.99703	0.14078	5.09453	8.59791	4.22318	0.15341	0.881024	60.2
2000	1164	68.1948	185.794	-857171	26.9493	97.9802	3.279	57.3617	0.207267	16.2017	1.16787	0.00940304	6.01683	0.142255	5.04625	8.55554	4.24605	0.154903	0.890255	59.9
2000	1163	67.4959	183.881	-848262	26.6846	96.9283	3.288	57.4187	0.209216	16.1737	1.17224	0.0095004	6.03644	0.143728	4.99846	8.51348	4.26872	0.156392	0.899473	59.6
2000	1162	66.8122	182.01	-839547	26.4255	95.8995	3.297	57.4754	0.211161	16.1455	1.17658	0.00959762	6.05587	0.145199	4.95113	8.47172	4.29121	0.157877	0.908677	59.3
2000	1161	66.1432	180.178	-831020	26.172	94.893	3.306	57.5319	0.213101	16.1173	1.18089	0.0096947	6.07512	0.146668	4.90427	8.43026	4.3135	0.159358	0.917868	59
2000	1160	65.4883	178.384	-822676	25.9238	93.9082	3.315	57.5882	0.215037	16.089	1.18519	0.00979164	6.09419	0.148134	4.85788	8.38909	4.33561	0.160836	0.927046	58.7
2000	1159	64.8473	176.628	-814507	25.6807	92.9444	3.324	57.6442	0.216967	16.0606	1.18946	0.00988844	6.1131	0.149599	4.81193	8.34822	4.35753	0.16231	0.936211	58.4
2000	1158	64.2195	174.909	-806510	25.4426	92.0008	3.333	57.6999	0.218893	16.0321	1.1937	0.0099851	6.13183	0.151061	4.76644	8.30763	4.37927	0.16378	0.945363	58.1
2000	1157	63.6046	173.224	-798677	25.2094	91.0769	3.342	57.7555	0.220815	16.0035	1.19793	0.0100816	6.1504	0.152522	4.72139	8.26734	4.40083	0.165246	0.954503	57.8
2000	1156	63.0021	171.573	-791005	24.9809	90.172	3.351	57.8108	0.222732	15.9748	1.20213	0.010178	6.1688	0.15398	4.67678	8.22732	4.42221	0.166709	0.96363	57.5
2000	1155	62.4118	169.955	-783489	24.757	89.2855	3.36	57.8658	0.224644	15.946	1.20632	0.0102743	6.18704	0.155437	4.63261	8.18759	4.44341	0.168168	0.972744	57.2
2000	1154	61.8333	168.37	-776122	24.5374	88.417	3.368	57.9206	0.226552	15.9171	1.21048	0.0103704	6.20512	0.156891	4.58886	8.14814	4.46443	0.169623	0.981846	56.8
2000	1153	61.2661	166.815	-768902	24.3221	87.5658	3.377	57.9752	0.228456	15.8881	1.21462	0.0104664	6.22304	0.158343	4.54553	8.10896	4.48528	0.171075	0.990935	56.5
2000	1152	60.71	165.29	-761824	24.111	86.7314	3.386	58.0296	0.230356	15.859	1.21874	0.0105623	6.24081	0.159794	4.50262	8.07005	4.50596	0.172524	1.00001	56.2
2000	1151	60.1646	163.794	-754883	23.9039	85.9134	3.394	58.0837	0.232251	15.8299	1.22284	0.0106581	6.25843	0.161242	4.46013	8.03141	4.52646	0.173968	1.00908	55.9
2000	1150	59.6296	162.327	-748075	23.7007	85.1112	3.403	58.1376	0.234142	15.8006	1.22693	0.0107537	6.27589	0.162689	4.41803	7.99304	4.5468	0.17541	1.01813	55.6
2000	1149	59.1047	160.887	-741397	23.5014	84.3244	3.411	58.1912	0.236029	15.7713	1.23099	0.0108492	6.29321	0.164134	4.37635	7.95494	4.56697	0.176847	1.02717	55.3
2000	1148	58.5896	159.474	-734845	23.3057	83.5526	3.42	58.2447	0.237912	15.7418	1.23504	0.0109446	6.31038	0.165577	4.33505	7.91709	4.58697	0.178282	1.0362	55
2000	1147	58.0841	158.087	-728415	23.1136	82.7952	3.428	58.2979	0.239791	15.7123	1.23907	0.0110398	6.32741	0.167018	4.29415	7.87951	4.60681	0.179713	1.04522	54.7
2000	1146	57.5878	156.726	-722104	22.925	82.052	3.436	58.3509	0.241666	15.6828	1.24308	0.011135	6.3443	0.168457	4.25364	7.84218	4.62648	0.18114	1.05423	54.4
2000	1145	57.1006	155.388	-715908	22.7397	81.3225	3.445	58.4037	0.243537	15.6531	1.24707	0.01123	6.36105	0.169895	4.21351	7.8051	4.646	0.182564	1.06322	54.1
2000	1144	56.6221	154.075	-709825	22.5578	80.6063	3.453	58.4563	0.245404	15.6233	1.25105	0.0113249	6.37766	0.17133	4.17376	7.76828	4.66535	0.183985	1.07221	53.8
2000	1143	56.1521	152.785	-703851	22.3791	79.9031	3.461	58.5087	0.247268	15.5935	1.25501	0.0114197	6.39413	0.172764	4.13438	7.7317	4.68455	0.185402	1.08118	53.5
2000	1142	55.6905	151.517	-697982	22.2035	79.2124	3.469	58.5608	0.249127	15.5636	1.25896	0.0115143	6.41048	0.174196	4.09537	7.69538	4.70359	0.186817	1.09015	53.2
2000	1141	55.2369	150.271	-692218	22.0309	78.5341	3.477	58.6127	0.250983	15.5336	1.26289	0.0116089	6.42669	0.175627	4.05673	7.65929	4.72247	0.188227	1.0991	52.9
2000	1140	54.7911	149.047	-686554	21.8613	77.8677	3.485	58.6645	0.252836	15.5036	1.2668	0.0117033	6.44276	0.177056	4.01845	7.62345	4.7412	0.189635	1.10804	52.6
2000	1139	54.353	147.843	-680987	21.6945	77.2129	3.493	58.716	0.254684	15.4735	1.2707	0.0117977	6.45871	0.178483	3.98052	7.58785	4.75978	0.191039	1.11697	52.3
2000	1138	53.9223	146.66	-675516	21.5306	76.5694	3.501	58.7673	0.256529	15.4433	1.27459	0.0118919	6.47454	0.179908	3.94294	7.55248	4.7782	0.192441	1.12589	52
2000	1137	53.4989	145.497	-670138	21.3694	75.937	3.509	58.8184	0.258371	15.413	1.27846	0.011986	6.49024	0.181332	3.90572	7.51735	4.79648	0.193839	1.1348	51.7
2000	1136	53.0826	144.353	-664851	21.2108	75.3153	3.517	58.8693	0.260209	15.3827	1.28231	0.01208	6.50581	0.182754	3.86883	7.48245	4.81461	0.195233	1.1437	51.4
2000	1135	52.6731	143.227	-659651	21.0548	74.704	3.525	58.92	0.262044	15.3523	1.28615	0.0121739	6.52126	0.184175	3.83229	7.44779	4.83259	0.196625	1.15259	51.1
2000	1134	52.2704	142.12	-654537	20.9014	74.1029	3.532	58.9705	0.263875	15.3218	1.28998	0.0122677	6.5366	0.185594	3.79608	7.41335	4.85043	0.198014	1.16148	50.8
2000	1133	51.8741	141.031	-649507	20.7504	73.5118	3.54	59.0208	0.265703	15.2913	1.29379	0.0123614	6.55181	0.187012	3.7602	7.37914	4.86812	0.1994	1.17035	50.5
2000	1132	51.4843	139.959	-644559	20.6018	72.9303	3.548	59.0709	0.267527	15.2607	1.2976	0.012455	6.5669	0.188428	3.72465	7.34515	4.88567	0.200782	1.17921	50.3
2000	1131	51.1007	138.904	-639690	20.4555	72.3583	3.555	59.1209	0.269349	15.23	1.30138	0.0125485	6.58188	0.189842	3.68943	7.31138	4.90308	0.202162	1.18806	50
2000	1130	50.7231	137.865	-634899	20.3116	71.7955	3.563	59.1706	0.271167	15.1993	1.30516	0.0126419	6.59675	0.191256	3.65452	7.27784	4.92034	0.203538	1.1969	49.7
2000	1129	50.3515	136.843	-630184	20.1698	71.2417	3.571	59.2201	0.272982	15.1685	1.30892	0.0127352	6.6115	0.192667	3.61993	7.24451	4.93747	0.204912	1.20574	49.4
2000	1128	49.9856	135.836	-625542	20.0303	70.6966	3.578	59.2694	0.274794	15.1377	1.31267	0.0128284	6.62613	0.194077	3.58566	7.21139	4.95446	0.206282	1.21456	49.1
2000	1127	49.6254	134.845	-620973	19.8928	70.1601	3.586	59.3186	0.276603	15.1068	1.31641	0.0129216	6.64066	0.195486	3.55169	7.1785	4.97132	0.20765	1.22338	48.8
2000	1126	49.2707	133.868	-616474	19.7574	69.632	3.593	59.3676	0.278409	15.0758	1.32014	0.0130146	6.65508	0.196893	3.51803	7.14581	4.98804	0.209015	1.23219	48.5
2000	1125	48.9214	132.907	-612043	19.6241	69.112	3.6	59.4163	0.280212	15.0448	1.32386	0.0131075	6.66939	0.198299	3.48467	7.11333	5.00462	0.210377	1.24099	48.2
2000	1124	48.5773	131.959	-607680	19.4927	68.5999	3.608	59.4649	0.282012	15.0137	1.32756	0.0132004	6.68359	0.199704	3.45162	7.08107	5.02107	0.211736	1.24978	47.9
2000	1123	48.2383	131.026	-603383	19.3632	68.0957	3.615	59.5133	0.283809	14.9826	1.33126	0.0132931	6.69768	0.201107	3.41885	7.049	5.03739	0.213092	1.25856	47.6
2000	1122	47.9043	130.106	-599149	19.2357	67.599	3.622	59.5616	0.285603	14.9514	1.33494	0.0133858	6.71167	0.202509	3.38638	7.01715	5.05358	0.214445	1.26733	47.3
2000	1121	47.5753	129.2	-594978	19.1099	67.1097	3.629	59.6096	0.287394	14.9202	1.33861	0.0134784	6.72556	0.20391	3.3542	6.98549	5.06964	0.215796	1.2761	47
2000	1120	47.251	128.307	-590868	18.986	66.6277	3.636	59.6575	0.289183	14.8889	1.34227	0.0135709	6.73934	0.20531	3.3223	6.95404	5.08557	0.217144	1.28486	46.7
2000	1119	46.9314	127.426	-586818	18.8639	66.1528	3.644	59.7052	0.290969	14.8576	1.34592	0.0136633	6.75302	0.206708	3.29069	6.92278	5.10138	0.218489	1.29361	46.5
2000	1118	46.6163	126.558	-582826	18.7434	65.6848	3.651	59.7527	0.292752	14.8262	1.34957	0.0137557	6.7666	0.208105	3.25936	6.89173	5.11705	0.219831	1.30235	46.2
2000	1117	46.3057	125.702	-578892	18.6246	65.2236	3.658	59.8	0.294533	14.7948	1.3532	0.0138479	6.78008	0.209501	3.2283	6.86086	5.13261	0.221171	1.31108	45.9
2000	1116	45.9995	124.858	-575013	18.5075	64.7689	3.665	59.8472	0.296311	14.7633	1.35682	0.0139401	6.79346	0.210895	3.19752	6.8302	5.14804	0.222508	1.31981	45.6
2000	1115	45.6976	124.026	-571189	18.392	64.3208	3.671	59.8942	0.298086	14.7318	1.36043	0.0140322	6.80674	0.212289	3.167	6.79972	5.16334	0.223843	1.32853	45.3
2000	1114	45.3998	123.205	-567418	18.2781	63.879	3.678	59.941	0.299859	14.7002	1.36403	0.0141242	6.81992	0.213681	3.13675	6.76943	5.17853	0.225174	1.33725	45
2000	1113	45.1062	122.395	-563700	18.1657	63.4434	3.685	59.9877	0.301629	14.6686	1.36763	0.0142162	6.83301	0.215072	3.10677	6.73934	5.19359	0.226503	1.34595	44.7
2000	1112	44.8165	121.596	-560033	18.0548	63.0138	3.692	60.0342	0.303397	14.6369	1.37121	0.0143081	6.846	0.216462	3.07705	6.70943	5.20853	0.22783	1.35465	44.5
2000	1111	44.5308	120.808	-556416	17.9454	62.5902	3.699	60.0805	0.305162	14.6052	1.37479	0.0143999	6.8589	0.217851	3.04759	6.6797	5.22336	0.229154	1.36334	44.2
2000	1110	44.2489	120.03	-552848	17.8374	62.1724	3.706	60.1267	0.306925	14.5735	1.37835	0.0144916	6.8717	0.219239	3.01838	6.65016	5.23807	0.230475	1.37203	43.9
2000	1109	43.9707	119.263	-549328	17.7309	61.7603	3.712	60.1727	0.308686	14.5417	1.38191	0.0145833	6.88441	0.220626	2.98943	6.6208	5.25266	0.231794	1.38071	43.6
2000	1108	43.6963	118.506	-545854	17.6257	61.3537	3.719	60.2185	0.310444	14.5099	1.38546	0.0146749	6.89703	0.222012	2.96073	6.59163	5.26714	0.233111	1.38938	43.3
2000	1107	43.4254	117.758	-542427	17.5219	60.9526	3.726	60.2642	0.3122	14.478	1.389	0.0147664	6.90955	0.223396	2.93227	6.56263	5.2815	0.234424	1.39805	43
2000	1106	43.1581	117.02	-539045	17.4194	60.5568	3.732	60.3097	0.313953	14.4461	1.39253	0.0148579	6.92199	0.22478	2.90406	6.53381	5.29574	0.235736	1.40671	42.8
2000	1105	42.8942	116.292	-535707	17.3183	60.1662	3.739	60.3551	0.315705	14.4142	1.39606	0.0149493	6.93433	0.226163	2.87609	6.50516	5.30988	0.237045	1.41536	42.5
2000	1104	42.6337	115.572	-532413	17.2184	59.7808	3.745	60.4003	0.317454	14.3822	1.39957	0.0150406	6.94658	0.227545	2.84836	6.47669	5.3239	0.238351	1.42401	42.2
2000	1103	42.3765	114.862	-529160	17.1197	59.4004	3.752	60.4453	0.319201	14.3502	1.40308	0.0151319	6.95875	0.228926	2.82087	6.4484	5.33781	0.239656	1.43265	41.9
2000	1102	42.1226	114.161	-525950	17.0223	59.0249	3.758	60.4902	0.320946	14.3182	1.40658	0.0152231	6.97082	0.230306	2.79362	6.42027	5.35162	0.240957	1.44129	41.6
2000	1101	41.8718	113.468	-522780	16.9261	58.6542	3.764	60.5349	0.322689	14.2861	1.41008	0.0153143	6.98281	0.231685	2.76659	6.39232	5.36531	0.242257	1.44992	41.4
2000	1100	41.6242	112.784	-519649	16.831	58.2882	3.771	60.5795	0.32443	14.254	1.41356	0.0154054	6.99471	0.233063	2.7398	6.36453	5.3789	0.243554	1.45854	41.1
2000	1099	41.3797	112.109	-516558	16.7371	57.9269	3.777	60.624	0.326169	14.2218	1.41704	0.0154965	7.00652	0.234441	2.71323	6.33692	5.39237	0.244848	1.46716	40.8
2000	1098	41.1381	111.441	-513506	16.6444	57.5701	3.783	60.6683	0.327906	14.1897	1.42051	0.0155874	7.01825	0.235817	2.68689	6.30946	5.40575	0.246141	1.47578	40.5
2000	1097	40.8995	110.782	-510491	16.5527	57.2177	3.79	60.7124	0.32964	14.1574	1.42397	0.0156784	7.02989	0.237193	2.66077	6.28218	5.41901	0.247431	1.48439	40.3
2000	1096	40.6638	110.13	-507513	16.4622	56.8697	3.796	60.7564	0.331373	14.1252	1.42743	0.0157693	7.04145	0.238568	2.63487	6.25505	5.43218	0.248718	1.49299	40
2000	1095	40.4309	109.486	-504571	16.3727	56.526	3.802	60.8002	0.333104	14.0929	1.43088	0.0158601	7.05292	0.239942	2.60919	6.22809	5.44524	0.250004	1.50159	39.7
2000	1094	40.2008	108.85	-501664	16.2843	56.1865	3.808	60.8439	0.334833	14.0606	1.43432	0.0159509	7.0643	0.241316	2.58372	6.20129	5.45819	0.251287	1.51019	39.4
2000	1093	39.9734	108.221	-498792	16.1968	55.8511	3.814	60.8875	0.33656	14.0283	1.43776	0.0160416	7.0756	0.242688	2.55847	6.17465	5.47105	0.252568	1.51878	39.2
2000	1092	39.7487	107.6	-495955	16.1104	55.5197	3.82	60.9309	0.338286	13.996	1.44119	0.0161323	7.08682	0.24406	2.53343	6.14817	5.4838	0.253847	1.52736	38.9
2000	1091	39.5266	106.986	-493151	16.025	55.1923	3.826	60.9742	0.340009	13.9636	1.44461	0.0162229	7.09796	0.245431	2.5086	6.12184	5.49645	0.255124	1.53594	38.6
2000	1090	39.3072	106.378	-490380	15.9406	54.8688	3.832	61.0173	0.341731	13.9312	1.44803	0.0163135	7.10901	0.246802	2.48398	6.09567	5.50901	0.256398	1.54452	38.3
2000	1089	39.0902	105.778	-487641	15.8571	54.5492	3.838	61.0604	0.343451	13.8988	1.45144	0.0164041	7.11998	0.248172	2.45956	6.06965	5.52146	0.257671	1.55309	38.1
2000	1088	38.8757	105.185	-484934	15.7746	54.2332	3.844	61.1032	0.345169	13.8663	1.45484	0.0164946	7.13087	0.249541	2.43534	6.04379	5.53382	0.258941	1.56166	37.8
2000	1087	38.6637	104.598	-482258	15.693	53.921	3.85	61.146	0.346886	13.8338	1.45823	0.016585	7.14167	0.250909	2.41132	6.01808	5.54608	0.260209	1.57023	37.5
2000	1086	38.454	104.018	-479613	15.6122	53.6123	3.856	61.1885	0.348601	13.8013	1.46162	0.0166754	7.1524	0.252277	2.38751	5.99252	5.55825	0.261475	1.57879	37.3
2000	1085	38.2467	103.444	-476998	15.5324	53.3072	3.862	61.231	0.350314	13.7688	1.46501	0.0167658	7.16304	0.253645	2.36389	5.96711	5.57032	0.262739	1.58734	37
2000	1084	38.0418	102.876	-474412	15.4535	53.0056	3.867	61.2733	0.352026	13.7363	1.46839	0.0168562	7.1736	0.255011	2.34046	5.94184	5.5823	0.264	1.5959	36.7
2000	1083	37.8391	102.315	-471855	15.3754	52.7074	3.873	61.3155	0.353736	13.7037	1.47176	0.0169465	7.18408	0.256377	2.31723	5.91673	5.59418	0.26526	1.60445	36.5
2000	1082	37.6386	101.76	-469327	15.2981	52.4126	3.879	61.3576	0.355445	13.6711	1.47512	0.0170367	7.19448	0.257743	2.29419	5.89176	5.60597	0.266518	1.61299	36.2
2000	1081	37.4403	101.211	-466827	15.2217	52.1211	3.885	61.3996	0.357152	13.6385	1.47848	0.017127	7.2048	0.259108	2.27133	5.86693	5.61767	0.267773	1.62154	35.9
2000	1080	37.2442	100.667	-464354	15.146	51.8328	3.89	61.4414	0.358857	13.6059	1.48184	0.0172171	7.21504	0.260473	2.24867	5.84225	5.62927	0.269027	1.63007	35.7
2000	1079	37.0501	100.13	-461908	15.0712	51.5477	3.896	61.4831	0.360561	13.5733	1.48518	0.0173073	7.2252	0.261837	2.22619	5.81771	5.64079	0.270279	1.63861	35.4
2000	1078	36.8582	99.598	-459489	14.9972	51.2658	3.901	61.5246	0.362264	13.5406	1.48852	0.0173974	7.23529	0.2632	2.20389	5.79331	5.65221	0.271528	1.64714	35.1
2000	1077	36.6683	99.0718	-457096	14.9239	50.9869	3.907	61.5661	0.363965	13.5079	1.49186	0.0174875	7.24529	0.264563	2.18178	5.76905	5.66355	0.272776	1.65567	34.9
2000	1076	36.4804	98.5511	-454728	14.8514	50.711	3.912	61.6074	0.365665	13.4753	1.49519	0.0175776	7.25521	0.265926	2.15984	5.74494	5.6748	0.274022	1.6642	34.6
2000	1075	36.2945	98.0358	-452386	14.7797	50.4381	3.918	61.6486	0.367363	13.4425	1.49852	0.0176676	7.26505	0.267288	2.13808	5.72095	5.68596	0.275266	1.67273	34.4
2000	1074	36.1105	97.5258	-450069	14.7087	50.1682	3.923	61.6897	0.36906	13.4098	1.50183	0.0177576	7.27482	0.26865	2.1165	5.69711	5.69703	0.276508	1.68125	34.1
2000	1073	35.9285	97.0211	-447775	14.6384	49.9011	3.929	61.7306	0.370755	13.3771	1.50515	0.0178476	7.2845	0.270011	2.0951	5.6734	5.70802	0.277748	1.68977	33.8
2000	1072	35.7483	96.5215	-445506	14.5688	49.6368	3.934	61.7714	0.37245	13.3443	1.50845	0.0179376	7.29411	0.271372	2.07386	5.64983	5.71892	0.278986	1.69828	33.6
2000	1071	35.57	96.0269	-443261	14.4999	49.3754	3.939	61.8122	0.374143	13.3116	1.51176	0.0180275	7.30364	0.272732	2.0528	5.62639	5.72974	0.280222	1.7068	33.3
2000	1070	35.3934	95.5373	-441038	14.4317	49.1166	3.945	61.8528	0.375834	13.2788	1.51505	0.0181174	7.31309	0.274093	2.03191	5.60308	5.74048	0.281456	1.71531	33.1
2000	1069	35.2187	95.0527	-438839	14.3642	48.8606	3.95	61.8933	0.377524	13.246	1.51834	0.0182073	7.32246	0.275452	2.01119	5.57991	5.75113	0.282689	1.72382	32.8
2000	1068	35.0457	94.5728	-436662	14.2973	48.6072	3.955	61.9336	0.379214	13.2132	1.52163	0.0182972	7.33175	0.276812	1.99063	5.55687	5.76169	0.28392	1.73233	32.6
2000	1067	34.8745	94.0977	-434507	14.2311	48.3564	3.961	61.9739	0.380901	13.1804	1.52491	0.018387	7.34096	0.278171	1.97024	5.53395	5.77218	0.285149	1.74083	32.3
2000	1066	34.705	93.6273	-432373	14.1656	48.1081	3.966	62.0141	0.382588	13.1476	1.52818	0.0184768	7.3501	0.27953	1.95001	5.51117	5.78259	0.286376	1.74934	32.1
2000	1065	34.5371	93.1614	-430261	14.1006	47.8624	3.971	62.0541	0.384274	13.1148	1.53145	0.0185666	7.35915	0.280889	1.92994	5.48851	5.79291	0.287601	1.75784	31.8
2000	1064	34.3705	92.6991	-428167	14.0362	47.6185	3.976	62.0946	0.38594	13.082	1.53465	0.0184385	7.36779	0.282251	1.90997	5.46597	5.80322	0.288828	1.76636	31.6
2000	1063	34.2051	92.2404	-426091	13.9723	47.3766	3.981	62.1354	0.387589	13.0492	1.53781	0.0181446	7.37608	0.283615	1.89012	5.44355	5.81351	0.290056	1.7749	31.3
2000	1062	34.0414	91.7861	-424035	13.909	47.1371	3.987	62.1761	0.389235	13.0164	1.54095	0.0178512	7.38428	0.284979	1.87043	5.42126	5.82371	0.291283	1.78344	31.1
2000	1061	33.8792	91.3361	-422000	13.8463	46.9	3.992	62.2168	0.390877	12.9837	1.54409	0.0175583	7.39238	0.286343	1.8509	5.39908	5.83384	0.292508	1.79198	30.8
2000	1060	33.7186	90.8904	-419984	13.7842	46.6652	3.997	62.2573	0.392518	12.9509	1.54722	0.0172659	7.4004	0.287707	1.83152	5.37704	5.8439	0.293731	1.80051	30.6
2000	1059	33.5595	90.4489	-417988	13.7227	46.4327	4.002	62.2978	0.394156	12.9181	1.55035	0.016974	7.40833	0.289071	1.81229	5.35511	5.85388	0.294953	1.80905	30.3
2000	1058	33.4019	90.0115	-416011	13.6618	46.2025	4.007	62.3381	0.395791	12.8853	1.55346	0.0166824	7.41617	0.290435	1.79322	5.3333	5.86378	0.296173	1.81758	30.1
2000	1057	33.2458	89.5782	-414053	13.6014	45.9745	4.012	62.3784	0.397424	12.8525	1.55657	0.0163913	7.42393	0.291799	1.77429	5.31161	5.87361	0.297391	1.82612	29.8
2000	1056	33.0911	89.1489	-412114	13.5415	45.7487	4.017	62.4185	0.399054	12.8197	1.55967	0.0161005	7.43159	0.293163	1.75552	5.29004	5.88337	0.298608	1.83465	29.6
2000	1055	32.9379	88.7235	-410193	13.4823	45.525	4.022	62.4586	0.400681	12.7869	1.56277	0.0158101	7.43917	0.294526	1.7369	5.26859	5.89305	0.299823	1.84319	29.3
2000	1054	32.7861	88.302	-408290	13.4235	45.3035	4.027	62.4986	0.402306	12.7541	1.56585	0.0155199	7.44665	0.29589	1.71842	5.24726	5.90266	0.301037	1.85172	29.1
2000	1053	32.6357	87.8844	-406405	13.3653	45.084	4.032	62.5385	0.403928	12.7212	1.56893	0.01523	7.45405	0.297254	1.70008	5.22604	5.9122	0.302249	1.86026	28.9
2000	1052	32.4867	87.4705	-404537	13.3076	44.8667	4.037	62.5784	0.405547	12.6884	1.572	0.0149404	7.46135	0.298617	1.6819	5.20494	5.92166	0.30346	1.86879	28.6
2000	1051	32.339	87.0603	-402687	13.2504	44.6513	4.042	62.6181	0.407163	12.6556	1.57507	0.0146509	7.46857	0.299981	1.66385	5.18395	5.93106	0.304669	1.87732	28.4
2000	1050	32.1926	86.6537	-400853	13.1937	44.4379	4.047	62.6578	0.408775	12.6228	1.57812	0.0143616	7.47569	0.301345	1.64595	5.16308	5.94039	0.305877	1.88586	28.1
2000	1049	32.0476	86.2508	-399037	13.1375	44.2266	4.051	62.6974	0.410385	12.59	1.58117	0.0140724	7.48271	0.302709	1.62818	5.14232	5.94965	0.307083	1.89439	27.9
2000	1048	31.9038	85.8514	-397237	13.0818	44.0171	4.056	62.7369	0.411991	12.5571	1.58421	0.0137833	7.48965	0.304073	1.61056	5.12167	5.95884	0.308288	1.90293	27.7
2000	1047	31.7613	85.4555	-395453	13.0266	43.8096	4.061	62.7763	0.413594	12.5243	1.58724	0.0134942	7.49648	0.305437	1.59307	5.10113	5.96796	0.309492	1.91147	27.4
2000	1046	31.6201	85.0631	-393685	12.9718	43.6039	4.066	62.8157	0.415193	12.4915	1.59026	0.0132052	7.50323	0.306801	1.57572	5.0807	5.97702	0.310694	1.92	27.2
2000	1045	31.4801	84.674	-391934	12.9176	43.4001	4.071	62.855	0.416789	12.4587	1.59327	0.0129162	7.50987	0.308165	1.55851	5.06038	5.986	0.311894	1.92854	27
2000	1044	31.3413	84.2883	-390197	12.8638	43.1981	4.075	62.8942	0.418381	12.4258	1.59628	0.0126272	7.51642	0.30953	1.54143	5.04017	5.99493	0.313093	1.93708	26.7
2000	1043	31.2038	83.9059	-388476	12.8104	42.9979	4.08	62.9334	0.419968	12.393	1.59927	0.0123381	7.52287	0.310895	1.52448	5.02006	6.00379	0.314291	1.94562	26.5
2000	1042	31.0674	83.5267	-386770	12.7575	42.7995	4.085	62.9725	0.421552	12.3602	1.60226	0.012049	7.52921	0.31226	1.50767	5.00006	6.01258	0.315488	1.95417	26.3
2000	1041	30.9321	83.1507	-385079	12.705	42.6028	4.089	63.0115	0.423131	12.3274	1.60523	0.0117597	7.53546	0.313625	1.49098	4.98017	6.02131	0.316683	1.96271	26
2000	1040	30.798	82.7779	-383403	12.653	42.4078	4.094	63.0505	0.424706	12.2946	1.6082	0.0114704	7.54161	0.31499	1.47443	4.96038	6.02998	0.317877	1.97126	25.8
2000	1039	30.665	82.4082	-381741	12.6014	42.2146	4.098	63.0894	0.426276	12.2618	1.61115	0.0111809	7.54765	0.316356	1.458	4.9407	6.03859	0.31907	1.9798	25.6
2000	1038	30.5332	82.0415	-380094	12.5503	42.023	4.103	63.1283	0.427841	12.229	1.6141	0.0108913	7.55358	0.317723	1.44171	4.92112	6.04714	0.320262	1.98835	25.3
2000	1037	30.4024	81.6779	-378460	12.4995	41.833	4.108	63.1671	0.429401	12.1962	1.61704	0.0106015	7.55941	0.319089	1.42554	4.90164	6.05562	0.321452	1.9969	25.1
2000	1036	30.2727	81.3172	-376841	12.4492	41.6447	4.112	63.2059	0.430955	12.1634	1.61996	0.0103116	7.56514	0.320456	1.40949	4.88227	6.06404	0.322641	2.00546	24.9
2000	1035	30.1441	80.9595	-375235	12.3992	41.4579	4.117	63.2446	0.432504	12.1306	1.62287	0.0100216	7.57075	0.321823	1.39357	4.86299	6.07241	0.323829	2.01402	24.7
2000	1034	30.0165	80.6047	-373643	12.3497	41.2728	4.121	63.2833	0.434046	12.0978	1.62577	0.00973151	7.57625	0.323191	1.37778	4.84381	6.08072	0.325016	2.02258	24.4
2000	1033	29.89	80.2527	-372064	12.3006	41.0892	4.125	63.3219	0.435582	12.065	1.62867	0.00944131	7.58164	0.324559	1.3621	4.82474	6.08896	0.326202	2.03114	24.2
2000	1032	29.7645	79.9035	-370498	12.2518	40.9071	4.13	63.3605	0.437112	12.0323	1.63154	0.00915106	7.58692	0.325928	1.34655	4.80576	6.09715	0.327386	2.0397	24
2000	1031	29.64	79.5571	-368944	12.2034	40.7265	4.134	63.3991	0.438634	11.9995	1.63441	0.00886081	7.59208	0.327297	1.33112	4.78688	6.10529	0.32857	2.04827	23.8
2000	1030	29.5164	79.2134	-367404	12.1555	40.5474	4.139	63.4376	0.440149	11.9668	1.63726	0.0085706	7.59712	0.328667	1.31581	4.76809	6.11337	0.329752	2.05684	23.6
2000	1029	29.3939	78.8724	-365876	12.1078	40.3697	4.143	63.4761	0.441656	11.934	1.6401	0.00828051	7.60204	0.330037	1.30061	4.74941	6.12139	0.330934	2.06542	23.3
2000	1028	29.2723	78.534	-364361	12.0606	40.1935	4.147	63.5145	0.443155	11.9013	1.64293	0.00799062	7.60685	0.331408	1.28554	4.73081	6.12936	0.332114	2.074	23.1
2000	1027	29.1516	78.1983	-362858	12.0137	40.0187	4.152	63.553	0.444645	11.8686	1.64574	0.00770101	7.61152	0.33278	1.27058	4.71231	6.13727	0.333293	2.08258	22.9
2000	1026	29.0319	77.8651	-361367	11.9672	39.8454	4.156	63.5914	0.446126	11.8359	1.64854	0.0074118	7.61607	0.334152	1.25574	4.69391	6.14514	0.334472	2.09117	22.7
2000	1025	28.9131	77.5345	-359888	11.921	39.6734	4.16	63.6298	0.447597	11.8032	1.65133	0.00712311	7.6205	0.335525	1.24101	4.67559	6.15295	0.33565	2.09976	22.5
2000	1024	28.7952	77.2064	-358420	11.8752	39.5027	4.165	63.6682	0.449058	11.7705	1.65409	0.00683509	7.62479	0.336899	1.2264	4.65737	6.1607	0.336826	2.10836	22.3
2000	1023	28.6782	76.8807	-356965	11.8297	39.3334	4.169	63.7065	0.450508	11.7378	1.65685	0.00654789	7.62895	0.338273	1.21191	4.63924	6.16841	0.338002	2.11696	22
2000	1022	28.5621	76.5575	-355520	11.7846	39.1654	4.173	63.7449	0.451946	11.7051	1.65958	0.0062617	7.63297	0.339649	1.19752	4.6212	6.17607	0.339177	2.12557	21.8
2000	1021	28.4468	76.2367	-354087	11.7398	38.9987	4.177	63.7833	0.453372	11.6725	1.66231	0.00597671	7.63686	0.341025	1.18325	4.60325	6.18368	0.340352	2.13418	21.6
2000	1020	28.3324	75.9182	-352665	11.6953	38.8333	4.181	63.8216	0.454786	11.6398	1.66501	0.00569316	7.64061	0.342402	1.16909	4.58539	6.19124	0.341525	2.1428	21.4
2000	1019	28.2188	75.6021	-351253	11.6511	38.6691	4.186	63.86	0.456186	11.6072	1.6677	0.00541127	7.64421	0.34378	1.15504	4.56761	6.19875	0.342698	2.15143	21.2
2000	1018	28.1061	75.2882	-349853	11.6073	38.5062	4.19	63.8984	0.457571	11.5746	1.67036	0.00513134	7.64767	0.345159	1.1411	4.54992	6.20621	0.343871	2.16006	21
2000	1017	27.9942	74.9766	-348463	11.5638	38.3445	4.194	63.9368	0.458942	11.5419	1.67301	0.00485364	7.65098	0.346539	1.12727	4.53232	6.21363	0.345042	2.16869	20.8
2000	1016	27.883	74.6672	-347083	11.5206	38.184	4.198	63.9752	0.460296	11.5093	1.67565	0.00457849	7.65414	0.347921	1.11355	4.51481	6.221	0.346213	2.17734	20.6
2000	1015	27.7727	74.36	-345714	11.4777	38.0247	4.202	64.0136	0.461634	11.4767	1.67826	0.00430626	7.65715	0.349303	1.09994	4.49738	6.22832	0.347384	2.18599	20.4
2000	1014	27.6631	74.055	-344355	11.4351	37.8666	4.206	64.0521	0.462953	11.4442	1.68085	0.00403729	7.65999	0.350687	1.08643	4.48003	6.23561	0.348554	2.19465	20.2
2000	1013	27.5543	73.7521	-343006	11.3928	37.7096	4.21	64.0905	0.464254	11.4116	1.68342	0.00377201	7.66268	0.352071	1.07303	4.46277	6.24285	0.349723	2.20331	20
2000	1012	27.4463	73.4513	-341668	11.3508	37.5537	4.214	64.1291	0.465535	11.379	1.68596	0.00351083	7.6652	0.353457	1.05974	4.44558	6.25004	0.350892	2.21199	19.8
2000	1011	27.339	73.1526	-340338	11.309	37.399	4.218	64.1676	0.466796	11.3465	1.68849	0.00325421	7.66755	0.354844	1.04655	4.42848	6.25719	0.352061	2.22067	19.6
2000	1010	27.2324	72.8559	-339019	11.2676	37.2454	4.222	64.2062	0.468034	11.314	1.69099	0.00300264	7.66974	0.356233	1.03347	4.41146	6.26431	0.353229	2.22936	19.4
2000	1009	27.1266	72.5613	-337709	11.2264	37.0929	4.226	64.2449	0.469248	11.2814	1.69347	0.00275663	7.67174	0.357623	1.0205	4.39453	6.27138	0.354397	2.23806	19.2
2000	1008	27.0214	72.2686	-336408	11.1856	36.9414	4.23	64.2836	0.470439	11.2489	1.69592	0.00251672	7.67357	0.359014	1.00763	4.37767	6.27841	0.355565	2.24676	19
2000	1007	26.917	71.9778	-335117	11.145	36.791	4.234	64.3223	0.471603	11.2165	1.69835	0.0022835	7.67522	0.360407	0.994858	4.36088	6.2854	0.356732	2.25548	18.8
2000	1006	26.8132	71.689	-333835	11.1046	36.6416	4.238	64.3612	0.47274	11.184	1.70075	0.00205754	7.67668	0.361802	0.982194	4.34418	6.29235	0.357899	2.26421	18.6
2000	1005	26.7102	71.4021	-332561	11.0646	36.4933	4.242	64.4001	0.473849	11.1515	1.70313	0.00183949	7.67795	0.363198	0.969633	4.32756	6.29927	0.359067	2.27294	18.4
2000	1004	26.6078	71.1171	-331297	11.0248	36.3459	4.246	64.439	0.474927	11.1191	1.70547	0.00162999	7.67902	0.364596	0.957175	4.31101	6.30615	0.360234	2.28169	18.2
2000	1003	26.506	70.8338	-330041	10.9852	36.1996	4.25	64.4781	0.475973	11.0866	1.70779	0.00142972	7.67989	0.365995	0.944819	4.29453	6.31299	0.3614	2.29045	18
2000	1002	26.4049	70.5524	-328794	10.9459	36.0542	4.254	64.5173	0.476985	11.0542	1.71008	0.00123938	7.68056	0.367397	0.932566	4.27813	6.3198	0.362567	2.29922	17.8
2000	1001	26.3045	70.2728	-327556	10.9069	35.9098	4.258	64.5565	0.477961	11.0218	1.71233	0.0010597	7.68101	0.3688	0.920414	4.2618	6.32658	0.363735	2.308	17.6
2000	1000	26.2046	69.9949	-326326	10.8681	35.7663	4.262	64.5959	0.478898	10.9894	1.71456	0.000891401	7.68124	0.370205	0.908364	4.24555	6.33332	0.364902	2.3168	17.4
2000	999	26.1054	69.7187	-325104	10.8296	35.6237	4.266	64.6354	0.479794	10.957	1.71674	0.000735258	7.68124	0.371612	0.896416	4.22937	6.34003	0.366069	2.3256	17.2
2000	998	26.0067	69.4442	-323890	10.7913	35.4821	4.27	64.675	0.480646	10.9246	1.71889	0.000592039	7.681	0.373022	0.884568	4.21326	6.34671	0.367237	2.33442	17
2000	997	25.9087	69.1714	-322684	10.7532	35.3413	4.274	64.7148	0.481448	10.8923	1.721	0.000462525	7.68051	0.374434	0.872823	4.19722	6.35336	0.368405	2.34326	16.8
2000	996	25.8112	68.9001	-321486	10.7154	35.2014	4.278	64.7548	0.482196	10.8599	1.72307	0.000347504	7.67974	0.375848	0.861179	4.18125	6.35999	0.369574	2.35211	16.7
2000	995	25.7142	68.6304	-320296	10.6777	35.0623	4.281	64.7949	0.482881	10.8276	1.72509	0.00024776	7.67867	0.377265	0.849637	4.16535	6.36659	0.370744	2.36098	16.5
2000	994	25.6178	68.3621	-319113	10.6403	34.924	4.285	64.8354	0.48349	10.7953	1.72704	0.000164061	7.67724	0.378686	0.838199	4.14951	6.37317	0.371915	2.36987	16.3
2000	993	25.5217	68.095	-317936	10.6031	34.7864	4.289	64.8763	0.484	10.763	1.72893	9.71423e-05	7.67538	0.380111	0.826867	4.13374	6.37975	0.373089	2.37879	16.1
2000	992	25.426	67.829	-316766	10.566	34.6493	4.293	64.9178	0.484361	10.7307	1.7307	4.76622e-05	7.6729	0.381541	0.815646	4.11801	6.38634	0.374266	2.38774	15.9
2000	991	25.3303	67.5631	-315599	10.529	34.5123	4.297	64.9605	0.484438	10.6984	1.73227	1.60781e-05	7.66927	0.382983	0.804553	4.10233	6.39299	0.375452	2.39676	15.8
2000	990	25.2401	67.311	-314475	10.4936	34.3827	4.3	64.9934	0.486512	10.6662	1.73527	0	7.67324	0.384351	0.793308	4.08701	6.39879	0.376568	2.40532	15.6
2000	989	25.1296	67.0098	-313209	10.453	34.2263	4.307	65.0685	0.479964	10.6336	1.73206	0	7.64417	0.386042	0.783218	4.0705	6.40802	0.377975	2.4159	15.4
2000	988	25.0187	66.708	-311946	10.4123	34.0696	4.314	65.1462	0.472919	10.6011	1.72842	0	7.61292	0.387753	0.77331	4.05399	6.41741	0.379399	2.42661	15.3
2000	987	24.9089	66.409	-310694	10.3721	33.9144	4.321	65.2236	0.465959	10.5685	1.72478	0	7.58176	0.389463	0.76351	4.03759	6.42671	0.380819	2.43731	15.2
2000	986	24.8001	66.1128	-309454	10.3322	33.7607	4.328	65.3007	0.459083	10.536	1.72114	0	7.55066	0.391171	0.753818	4.02128	6.43592	0.382236	2.448	15.1
2000	985	24.6924	65.8194	-308226	10.2927	33.6085	4.334	65.3776	0.452291	10.5034	1.7175	0	7.51964	0.392878	0.744231	4.00508	6.44506	0.383649	2.45868	15
2000	984	24.5856	65.5287	-307009	10.2536	33.4577	4.341	65.4542	0.44558	10.4709	1.71385	0	7.48869	0.394583	0.734749	3.98896	6.45411	0.38506	2.46936	14.9
2000	983	24.4799	65.2406	-305804	10.2148	33.3084	4.348	65.5306	0.438951	10.4383	1.71019	0	7.45781	0.396287	0.72537	3.97295	6.46309	0.386467	2.48002	14.8
2000	982	24.3752	64.9551	-304609	10.1763	33.1605	4.355	65.6067	0.432402	10.4058	1.70653	0	7.427	0.39799	0.716093	3.95703	6.47198	0.387871	2.49068	14.7
2000	981	24.2714	64.6723	-303426	10.1382	33.0139	4.361	65.6825	0.425933	10.3732	1.70287	0	7.39625	0.399692	0.706917	3.9412	6.48079	0.389272	2.50133	14.6
2000	980	24.1686	64.392	-302253	10.1004	32.8688	4.368	65.7581	0.419541	10.3407	1.6992	0	7.36558	0.401392	0.69784	3.92546	6.48953	0.39067	2.51197	14.4
2000	979	24.0667	64.1142	-301092	10.0629	32.725	4.374	65.8335	0.413228	10.3082	1.69553	0	7.33496	0.403091	0.688862	3.90982	6.49819	0.392065	2.5226	14.3
2000	978	23.9658	63.8388	-299940	10.0258	32.5825	4.381	65.9086	0.406991	10.2757	1.69185	0	7.30442	0.404788	0.679981	3.89427	6.50677	0.393457	2.53322	14.2
2000	977	23.8658	63.5659	-298799	9.98898	32.4414	4.387	65.9835	0.40083	10.2432	1.68817	0	7.27393	0.406485	0.671197	3.8788	6.51528	0.394846	2.54384	14.1
2000	976	23.7667	63.2955	-297668	9.95249	32.3015	4.393	66.0581	0.394744	10.2107	1.68448	0	7.24351	0.40818	0.662507	3.86343	6.52371	0.396231	2.55445	14
2000	975	23.6685	63.0273	-296547	9.9163	32.1629	4.4	66.1325	0.388732	10.1782	1.68079	0	7.21315	0.409874	0.653912	3.84814	6.53207	0.397614	2.56505	13.9
2000	974	23.5711	62.7616	-295436	9.88043	32.0256	4.406	66.2067	0.382794	10.1457	1.67709	0	7.18285	0.411567	0.645409	3.83294	6.54035	0.398993	2.57564	13.8
2000	973	23.4746	62.4981	-294335	9.84486	31.8895	4.412	66.2806	0.376928	10.1132	1.67338	0	7.15261	0.413258	0.636998	3.81783	6.54856	0.40037	2.58623	13.7
2000	972	23.379	62.2369	-293244	9.80959	31.7546	4.418	66.3543	0.371134	10.0808	1.66967	0	7.12243	0.414948	0.628678	3.8028	6.5567	0.401743	2.59681	13.6
2000	971	23.2842	61.9779	-292162	9.77461	31.6209	4.424	66.4278	0.365411	10.0484	1.66595	0	7.09231	0.416638	0.620448	3.78785	6.56476	0.403114	2.60738	13.5
2000	970	23.1903	61.7212	-291089	9.73993	31.4884	4.43	66.501	0.359758	10.0159	1.66223	0	7.06224	0.418325	0.612306	3.77299	6.57276	0.404481	2.61794	13.4
2000	969	23.0971	61.4666	-290026	9.70553	31.3571	4.436	66.5741	0.354175	9.98352	1.6585	0	7.03223	0.420012	0.604253	3.75821	6.58068	0.405846	2.6285	13.3
2000	968	23.0048	61.2142	-288972	9.67142	31.2269	4.442	66.6469	0.34866	9.95112	1.65476	0	7.00227	0.421698	0.596286	3.74352	6.58853	0.407208	2.63905	13.2
2000	967	22.9133	60.9639	-287927	9.63758	31.0979	4.448	66.7195	0.343213	9.91874	1.65102	0	6.97237	0.423382	0.588405	3.7289	6.59632	0.408566	2.64959	13.1
2000	966	22.8225	60.7157	-286890	9.60403	30.97	4.454	66.7919	0.337834	9.88637	1.64727	0	6.94252	0.425066	0.580609	3.71437	6.60403	0.409922	2.66012	13
2000	965	22.7326	60.4696	-285863	9.57074	30.8432	4.46	66.8641	0.332521	9.85402	1.64351	0	6.91273	0.426748	0.572898	3.69991	6.61168	0.411275	2.67065	12.9
2000	964	22.6434	60.2255	-284844	9.53773	30.7175	4.465	66.936	0.327275	9.82169	1.63974	0	6.88299	0.428429	0.565269	3.68554	6.61926	0.412625	2.68117	12.8
2000	963	22.5549	59.9834	-283834	9.50498	30.5929	4.471	67.0078	0.322093	9.78937	1.63597	0	6.8533	0.430109	0.557723	3.67124	6.62677	0.413972	2.69169	12.7
2000	962	22.4672	59.7434	-282832	9.47249	30.4693	4.477	67.0793	0.316976	9.75707	1.63219	0	6.82366	0.431788	0.550258	3.65701	6.63422	0.415317	2.70219	12.6
2000	961	22.3802	59.5052	-281838	9.44027	30.3468	4.482	67.1507	0.311923	9.72479	1.6284	0	6.79407	0.433466	0.542874	3.64287	6.6416	0.416658	2.71269	12.5
2000	960	22.294	59.269	-280853	9.4083	30.2253	4.488	67.2218	0.306933	9.69253	1.6246	0	6.76452	0.435143	0.535569	3.6288	6.64891	0.417997	2.72319	12.4
2000	959	22.2085	59.0347	-279876	9.37658	30.1049	4.494	67.2927	0.302005	9.66029	1.6208	0	6.73503	0.436819	0.528344	3.6148	6.65617	0.419333	2.73367	12.3
2000	958	22.1237	58.8023	-278907	9.34511	29.9854	4.499	67.3635	0.29714	9.62807	1.61699	0	6.70559	0.438493	0.521196	3.60088	6.66335	0.420666	2.74415	12.2
2000	957	22.0395	58.5718	-277946	9.31388	29.867	4.505	67.434	0.292336	9.59587	1.61317	0	6.67619	0.440167	0.514126	3.58703	6.67048	0.421996	2.75463	12.1
2000	956	21.9561	58.3431	-276992	9.2829	29.7495	4.51	67.5044	0.287592	9.56368	1.60934	0	6.64684	0.441839	0.507132	3.57325	6.67754	0.423323	2.76509	12
2000	955	21.8734	58.1162	-276047	9.25216	29.633	4.515	67.5745	0.282908	9.53153	1.6055	0	6.61754	0.443511	0.500214	3.55955	6.68453	0.424648	2.77555	11.9
2000	954	21.7913	57.8911	-275109	9.22166	29.5175	4.521	67.6445	0.278284	9.49939	1.60165	0	6.58828	0.445181	0.49337	3.54591	6.69147	0.425969	2.78601	11.8
2000	953	21.7099	57.6678	-274178	9.19139	29.4029	4.526	67.7142	0.273719	9.46727	1.5978	0	6.55907	0.446851	0.486601	3.53235	6.69835	0.427288	2.79646	11.7
2000	952	21.6291	57.4463	-273255	9.16136	29.2892	4.531	67.7838	0.269212	9.43518	1.59394	0	6.5299	0.448519	0.479905	3.51885	6.70516	0.428605	2.8069	11.6
2000	951	21.549	57.2264	-272339	9.13155	29.1765	4.536	67.8532	0.264762	9.40311	1.59006	0	6.50078	0.450187	0.473282	3.50543	6.71191	0.429918	2.81733	11.5
2000	950	21.4695	57.0083	-271431	9.10197	29.0646	4.542	67.9224	0.26037	9.37107	1.58618	0	6.4717	0.451853	0.466731	3.49207	6.71861	0.431229	2.82776	11.4
2000	949	21.3907	56.7918	-270529	9.07261	28.9537	4.547	67.9914	0.256034	9.33905	1.58229	0	6.44267	0.453518	0.460251	3.47878	6.72524	0.432537	2.83818	11.3
2000	948	21.3125	56.577	-269635	9.04348	28.8437	4.552	68.0603	0.251754	9.30705	1.57839	0	6.41368	0.455183	0.453842	3.46556	6.73182	0.433842	2.8486	11.2
2000	947	21.2349	56.3639	-268748	9.01456	28.7345	4.557	68.1289	0.247529	9.27508	1.57448	0	6.38473	0.456846	0.447502	3.4524	6.73834	0.435144	2.85901	11.1
2000	946	21.1579	56.1524	-267868	8.98586	28.6262	4.562	68.1974	0.24336	9.24314	1.57057	0	6.35582	0.458508	0.441232	3.43931	6.7448	0.436444	2.86941	11
2000	945	21.0815	55.9425	-266994	8.95737	28.5188	4.567	68.2657	0.239244	9.21122	1.56664	0	6.32695	0.46017	0.43503	3.42628	6.7512	0.437741	2.87981	10.9
2000	944	21.0057	55.7342	-266128	8.92909	28.4122	4.572	68.3338	0.235182	9.17932	1.5627	0	6.29813	0.46183	0.428896	3.41332	6.75754	0.439036	2.8902	10.8
2000	943	20.9305	55.5274	-265268	8.90102	28.3064	4.577	68.4018	0.231174	9.14746	1.55875	0	6.26935	0.463489	0.42283	3.40042	6.76383	0.440327	2.90058	10.7
2000	942	20.8559	55.3222	-264414	8.87316	28.2015	4.581	68.4696	0.227218	9.11562	1.5548	0	6.2406	0.465148	0.416829	3.38758	6.77006	0.441616	2.91096	10.6
2000	941	20.7819	55.1186	-263568	8.84549	28.0974	4.586	68.5372	0.223314	9.08381	1.55083	0	6.2119	0.466805	0.410895	3.37481	6.77624	0.442902	2.92133	10.5
2000	940	20.7084	54.9164	-262727	8.81804	27.9941	4.591	68.6046	0.219462	9.05203	1.54686	0	6.18324	0.468461	0.405026	3.36209	6.78236	0.444186	2.9317	10.5
2000	939	20.6355	54.7158	-261893	8.79078	27.8915	4.596	68.6719	0.215661	9.02027	1.54287	0	6.15462	0.470117	0.399222	3.34944	6.78843	0.445467	2.94206	10.4
2000	938	20.5631	54.5166	-261066	8.76371	27.7898	4.6	68.7389	0.211911	8.98855	1.53887	0	6.12603	0.471771	0.393482	3.33685	6.79444	0.446745	2.95241	10.3
2000	937	20.4913	54.3189	-260244	8.73685	27.6889	4.605	68.8059	0.208211	8.95686	1.53486	0	6.09749	0.473425	0.387805	3.32431	6.8004	0.44802	2.96276	10.2
2000	936	20.42	54.1227	-259429	8.71017	27.5887	4.61	68.8726	0.20456	8.92519	1.53085	0	6.06898	0.475077	0.382191	3.31184	6.8063	0.449293	2.9731	10.1
2000	935	20.3493	53.9278	-258620	8.68369	27.4893	4.614	68.9392	0.200959	8.89356	1.52682	0	6.04051	0.476728	0.37664	3.29942	6.81216	0.450563	2.98343	10
2000	934	20.2791	53.7344	-257817	8.65739	27.3906	4.619	69.0056	0.197406	8.86195	1.52278	0	6.01209	0.478379	0.37115	3.28706	6.81796	0.451831	2.99376	9.9
2000	933	20.2094	53.5424	-257020	8.63128	27.2927	4.623	69.0719	0.193902	8.83038	1.51873	0	5.9837	0.480028	0.365722	3.27476	6.8237	0.453095	3.00408	9.8
2000	932	20.1402	53.3518	-256229	8.60536	27.1955	4.628	69.138	0.190445	8.79884	1.51467	0	5.95534	0.481677	0.360354	3.26252	6.8294	0.454358	3.0144	9.7
2000	931	20.0716	53.1625	-255443	8.57962	27.0991	4.632	69.2039	0.187036	8.76733	1.51061	0	5.92703	0.483324	0.355046	3.25033	6.83504	0.455617	3.02471	9.6
2000	930	20.0034	52.9746	-254664	8.55405	27.0033	4.636	69.2697	0.183673	8.73585	1.50652	0	5.89875	0.484971	0.349798	3.23819	6.84064	0.456874	3.03501	9.6
2000	929	19.9358	52.7881	-253890	8.52867	26.9083	4.641	69.3353	0.180357	8.70441	1.50243	0	5.87051	0.486616	0.344609	3.22611	6.84618	0.458128	3.04531	9.5
2000	928	19.8687	52.6029	-253122	8.50347	26.814	4.645	69.4008	0.177086	8.67299	1.49833	0	5.84231	0.488261	0.339478	3.21409	6.85167	0.459379	3.0556	9.4
2000	927	19.802	52.4189	-252359	8.47843	26.7204	4.649	69.4661	0.173861	8.64162	1.49422	0	5.81414	0.489904	0.334406	3.20212	6.85711	0.460628	3.06589	9.3
2000	926	19.7358	52.2363	-251602	8.45358	26.6274	4.653	69.5313	0.170681	8.61027	1.49009	0	5.78601	0.491547	0.329391	3.1902	6.8625	0.461874	3.07617	9.2
2000	925	19.6701	52.055	-250850	8.42889	26.5352	4.658	69.5963	0.167545	8.57896	1.48596	0	5.75792	0.493188	0.324432	3.17833	6.86785	0.463118	3.08644	9.1
2000	924	19.6049	51.8749	-250104	8.40437	26.4436	4.662	69.6611	0.164454	8.54768	1.48181	0	5.72987	0.494829	0.319531	3.16652	6.87314	0.464359	3.09671	9
2000	923	19.5402	51.6961	-249363	8.38002	26.3527	4.666	69.7258	0.161406	8.51644	1.47766	0	5.70185	0.496468	0.314685	3.15475	6.87839	0.465597	3.10697	9
2000	922	19.4759	51.5185	-248628	8.35584	26.2624	4.67	69.7903	0.158402	8.48524	1.47349	0	5.67387	0.498107	0.309895	3.14304	6.88358	0.466833	3.11722	8.9
2000	921	19.4121	51.3422	-247898	8.33182	26.1728	4.674	69.8547	0.15544	8.45407	1.46931	0	5.64592	0.499744	0.30516	3.13138	6.88873	0.468066	3.12747	8.8
2000	920	19.3487	51.1671	-247173	8.30797	26.0839	4.678	69.919	0.152521	8.42293	1.46512	0	5.61801	0.50138	0.300479	3.11976	6.89383	0.469296	3.13771	8.7
2000	919	19.2858	50.9931	-246453	8.28427	25.9955	4.682	69.983	0.149643	8.39183	1.46092	0	5.59014	0.503016	0.295852	3.1082	6.89889	0.470524	3.14794	8.6
2000	918	19.2234	50.8204	-245738	8.26074	25.9078	4.686	70.047	0.146807	8.36077	1.4567	0	5.5623	0.50465	0.291279	3.09668	6.9039	0.471749	3.15817	8.5
2000	917	19.1614	50.6489	-245029	8.23736	25.8208	4.69	70.1108	0.144013	8.32975	1.45248	0	5.5345	0.506284	0.286759	3.08522	6.90886	0.472971	3.16839	8.5
2000	916	19.0998	50.4785	-244324	8.21414	25.7343	4.694	70.1744	0.141259	8.29876	1.44824	0	5.50674	0.507916	0.282292	3.0738	6.91377	0.474191	3.17861	8.4
2000	915	19.0386	50.3093	-243624	8.19108	25.6485	4.698	70.2379	0.138545	8.26781	1.444	0	5.47901	0.509547	0.277878	3.06242	6.91864	0.475408	3.18882	8.3
2000	914	18.9779	50.1412	-242929	8.16817	25.5633	4.701	70.3013	0.135871	8.2369	1.43974	0	5.45132	0.511178	0.273515	3.05109	6.92347	0.476622	3.19902	8.2
2000	913	18.9176	49.9743	-242239	8.14541	25.4786	4.705	70.3645	0.133237	8.20603	1.43547	0	5.42366	0.512807	0.269203	3.03981	6.92824	0.477834	3.20922	8.1
2000	912	18.8577	49.8085	-241554	8.1228	25.3946	4.709	70.4276	0.130642	8.17519	1.43118	0	5.39605	0.514435	0.264942	3.02858	6.93298	0.479043	3.21941	8
2000	911	18.7983	49.6438	-240874	8.10034	25.3112	4.713	70.4905	0.128086	8.14439	1.42689	0	5.36846	0.516062	0.260732	3.01739	6.93767	0.48025	3.22959	8
2000	910	18.7392	49.4802	-240198	8.07803	25.2283	4.716	70.5533	0.125568	8.11364	1.42259	0	5.34092	0.517688	0.256572	3.00624	6.94231	0.481453	3.23976	7.9
2000	909	18.6806	49.3177	-239527	8.05586	25.146	4.72	70.6159	0.123088	8.08292	1.41827	0	5.31341	0.519313	0.252462	2.99514	6.94691	0.482655	3.24993	7.8
2000	908	18.6224	49.1562	-238861	8.03384	25.0643	4.723	70.6784	0.120645	8.05224	1.41394	0	5.28594	0.520937	0.248401	2.98408	6.95147	0.483853	3.2601	7.7
2000	907	18.5645	48.9959	-238199	8.01196	24.9832	4.727	70.7408	0.11824	8.02161	1.4096	0	5.2585	0.522559	0.244389	2.97306	6.95598	0.485049	3.27025	7.7
2000	906	18.5071	48.8366	-237542	7.99023	24.9026	4.73	70.803	0.115872	7.99101	1.40525	0	5.23111	0.524181	0.240425	2.96209	6.96045	0.486242	3.2804	7.6
2000	905	18.4501	48.6783	-236889	7.96863	24.8225	4.734	70.8651	0.113539	7.96045	1.40089	0	5.20375	0.525802	0.236509	2.95115	6.96488	0.487432	3.29054	7.5
2000	904	18.3934	48.5211	-236241	7.94718	24.743	4.737	70.927	0.111243	7.92994	1.39651	0	5.17642	0.527421	0.232641	2.94026	6.96926	0.48862	3.30068	7.4
2000	903	18.3372	48.3649	-235597	7.92586	24.6641	4.741	70.9888	0.108983	7.89946	1.39213	0	5.14914	0.529039	0.228821	2.92941	6.9736	0.489805	3.3108	7.3
2000	902	18.2813	48.2098	-234957	7.90469	24.5857	4.744	71.0505	0.106758	7.86903	1.38773	0	5.12189	0.530657	0.225047	2.9186	6.9779	0.490988	3.32092	7.3
2000	901	18.2258	48.0556	-234322	7.88364	24.5078	4.748	71.112	0.104568	7.83864	1.38332	0	5.09468	0.532273	0.22132	2.90783	6.98216	0.492168	3.33104	7.2
2000	900	18.1706	47.9024	-233691	7.86274	24.4305	4.751	71.1734	0.102412	7.80829	1.3789	0	5.06751	0.533888	0.217639	2.8971	6.98637	0.493345	3.34114	7.1
orthopyroxene_0	thermodynamic	data	and	composition:
Pressure	Temperature	mass	S	H	V	Cp	structure	formula	SiO2	TiO2	Al2O3	Fe2O3	Cr2O3	FeO	MnO	MgO	CaO	Na2O	K2O	H2O	Mg#
2000	1199	0.297436	0.725998	-3821.4	0.092718	0.379169	opx	Na0.00Ca0.07Fe''0.26Mg1.60Fe'''0.01Ti0.00Al0.10Si1.94O6	55.3901	0.0136005	2.41842	0.536427	0	9.01267	0	30.6195	1.98643	0.0228033	0	0	86.0215
2000	1198	0.136281	0.332503	-1750.59	0.042475	0.173683	opx	Na0.00Ca0.08Fe''0.27Mg1.60Fe'''0.01Ti0.00Al0.10Si1.94O6	55.3779	0.0136079	2.42156	0.536729	0	9.0416	0	30.5833	2.00244	0.0229232	0	0
2000	1197	0.135757	0.331087	-1743.54	0.042305	0.172969	opx	Na0.00Ca0.08Fe''0.27Mg1.60Fe'''0.01Ti0.00Al0.10Si1.94O6	55.3656	0.0136146	2.42466	0.537019	0	9.07064	0	30.5468	2.01865	0.023044	0	0
2000	1196	0.135237	0.329682	-1736.55	0.042136	0.17226	opx	Na0.00Ca0.08Fe''0.27Mg1.60Fe'''0.01Ti0.00Al0.10Si1.94O6	55.3533	0.0136204	2.42773	0.537298	0	9.09976	0	30.5101	2.03507	0.0231657	0	0
2000	1195	0.449382	1.09497	-5767.3	0.139979	0.572159	opx	Na0.00Ca0.08Fe''0.27Mg1.59Fe'''0.01Ti0.00Al0.10Si1.94O6	55.3435	0.0136521	2.40876	0.536647	0	9.16856	0	30.4495	2.05607	0.0232838	0	0
2000	1194	0.429856	1.04687	-5513.76	0.133861	0.547063	opx	Na0.00Ca0.08Fe''0.27Mg1.59Fe'''0.01Ti0.00Al0.10Si1.94O6	55.3335	0.0136806	2.3905	0.536003	0	9.23635	0	30.3894	2.07717	0.0234016	0	0
2000	1193	0.418452	1.01859	-5364.63	0.130275	0.532321	opx	Na0.00Ca0.08Fe''0.27Mg1.59Fe'''0.01Ti0.00Al0.10Si1.94O6	55.3235	0.0137069	2.37243	0.535344	0	9.30407	0	30.329	2.09848	0.0235189	0	0
2000	1192	0.407497	0.991435	-5221.4	0.12683	0.518162	opx	Na0.00Ca0.08Fe''0.28Mg1.59Fe'''0.01Ti0.00Al0.10Si1.94O6	55.3133	0.0137308	2.35454	0.534669	0	9.37174	0	30.2684	2.12	0.0236357	0	0
2000	1191	0.396967	0.965337	-5083.77	0.12352	0.504555	opx	Na0.00Ca0.08Fe''0.28Mg1.58Fe'''0.01Ti0.00Al0.10Si1.94O6	55.3029	0.0137525	2.33683	0.533981	0	9.43934	0	30.2077	2.14173	0.0237522	0	0
2000	1190	0.386841	0.940246	-4951.45	0.120337	0.491473	opx	Na0.00Ca0.08Fe''0.28Mg1.58Fe'''0.01Ti0.00Al0.10Si1.95O6	55.2925	0.013772	2.3193	0.533279	0	9.50688	0	30.1467	2.16368	0.0238682	0	0
2000	1189	0.377099	0.916111	-4824.19	0.117275	0.478889	opx	Na0.00Ca0.08Fe''0.28Mg1.58Fe'''0.01Ti0.00Al0.10Si1.95O6	55.282	0.0137893	2.30194	0.532564	0	9.57435	0	30.0856	2.18585	0.0239838	0	0
2000	1188	0.367722	0.892885	-4701.73	0.114328	0.466779	opx	Na0.00Ca0.08Fe''0.28Mg1.58Fe'''0.01Ti0.00Al0.09Si1.95O6	55.2713	0.0138046	2.28475	0.531836	0	9.64176	0	30.0242	2.20824	0.0240991	0	0
2000	1187	0.358691	0.870523	-4583.82	0.111491	0.455119	opx	Na0.00Ca0.08Fe''0.29Mg1.57Fe'''0.01Ti0.00Al0.09Si1.95O6	55.2605	0.0138178	2.26773	0.531096	0	9.7091	0	29.9627	2.23085	0.0242139	0	0
2000	1186	0.349991	0.848983	-4470.26	0.108757	0.443888	opx	Na0.00Ca0.09Fe''0.29Mg1.57Fe'''0.01Ti0.00Al0.09Si1.95O6	55.2496	0.0138289	2.25088	0.530344	0	9.77637	0	29.9009	2.25369	0.0243284	0	0
2000	1185	0.341605	0.828226	-4360.83	0.106123	0.433064	opx	Na0.00Ca0.09Fe''0.29Mg1.57Fe'''0.01Ti0.00Al0.09Si1.95O6	55.2386	0.0138381	2.23419	0.529582	0	9.84358	0	29.839	2.27675	0.0244425	0	0
2000	1184	0.333519	0.808215	-4255.34	0.103583	0.422629	opx	Na0.00Ca0.09Fe''0.29Mg1.57Fe'''0.01Ti0.00Al0.09Si1.95O6	55.2275	0.0138454	2.21766	0.528808	0	9.91071	0	29.7768	2.30005	0.0245562	0	0
2000	1183	0.325718	0.788914	-4153.6	0.101134	0.412564	opx	Na0.00Ca0.09Fe''0.29Mg1.56Fe'''0.01Ti0.00Al0.09Si1.95O6	55.2163	0.0138508	2.20129	0.528025	0	9.97777	0	29.7145	2.32358	0.0246696	0	0
2000	1182	0.190621	0.461473	-2429.45	0.059168	0.241348	opx	Na0.00Ca0.09Fe''0.30Mg1.56Fe'''0.01Ti0.00Al0.09Si1.95O6	55.1991	0.013986	2.1951	0.529211	0	10.0517	0	29.6582	2.32791	0.0247638	0	0
2000	1181	0.17462	0.422529	-2224.25	0.054184	0.221	opx	Na0.00Ca0.09Fe''0.30Mg1.56Fe'''0.01Ti0.00Al0.09Si1.95O6	55.1814	0.0141314	2.18983	0.530558	0	10.1264	0	29.6024	2.33052	0.0248557	0	0
2000	1180	0.16987	0.410835	-2162.52	0.052694	0.214901	opx	Na0.00Ca0.09Fe''0.30Mg1.56Fe'''0.01Ti0.00Al0.09Si1.95O6	55.1636	0.0142759	2.18461	0.531897	0	10.201	0	29.5465	2.33308	0.0249468	0	0
2000	1179	0.16531	0.39961	-2103.26	0.051263	0.209048	opx	Na0.00Ca0.09Fe''0.30Mg1.55Fe'''0.01Ti0.00Al0.09Si1.95O6	55.1458	0.0144193	2.17943	0.533229	0	10.2758	0	29.4907	2.33558	0.0250371	0	0
2000	1178	0.16093	0.38883	-2046.35	0.049889	0.203426	opx	Na0.00Ca0.09Fe''0.31Mg1.55Fe'''0.01Ti0.00Al0.09Si1.95O6	55.1279	0.0145618	2.17431	0.534553	0	10.3507	0	29.4348	2.33803	0.0251267	0	0
2000	1177	0.15672	0.378472	-1991.68	0.048568	0.198024	opx	Na0.00Ca0.09Fe''0.31Mg1.55Fe'''0.01Ti0.00Al0.09Si1.95O6	55.1101	0.0147032	2.16923	0.53587	0	10.4256	0	29.3789	2.34043	0.0252155	0	0
2000	1176	0.152672	0.368515	-1939.12	0.047299	0.192831	opx	Na0.00Ca0.09Fe''0.31Mg1.55Fe'''0.01Ti0.00Al0.09Si1.95O6	55.0921	0.0148436	2.16419	0.537181	0	10.5006	0	29.323	2.34277	0.0253035	0	0
2000	1175	0.148778	0.358938	-1888.57	0.046078	0.187836	opx	Na0.00Ca0.09Fe''0.31Mg1.54Fe'''0.01Ti0.00Al0.09Si1.95O6	55.0742	0.0149831	2.15921	0.538486	0	10.5757	0	29.267	2.34505	0.0253908	0	0
2000	1174	0.14503	0.349723	-1839.94	0.044902	0.18303	opx	Na0.00Ca0.09Fe''0.32Mg1.54Fe'''0.01Ti0.00Al0.09Si1.95O6	55.0562	0.0151215	2.15426	0.539784	0	10.6509	0	29.211	2.34728	0.0254774	0	0
2000	1173	0.141421	0.340852	-1793.12	0.043771	0.178403	opx	Na0.00Ca0.09Fe''0.32Mg1.54Fe'''0.01Ti0.00Al0.09Si1.95O6	55.0382	0.015259	2.14937	0.541078	0	10.7262	0	29.1549	2.34945	0.0255633	0	0
2000	1172	0.137944	0.332309	-1748.03	0.042681	0.173947	opx	Na0.00Ca0.09Fe''0.32Mg1.54Fe'''0.01Ti0.00Al0.09Si1.95O6	55.0201	0.0153955	2.14452	0.542366	0	10.8016	0	29.0988	2.35157	0.0256485	0	0
2000	1171	0.134594	0.324077	-1704.58	0.041631	0.169653	opx	Na0.00Ca0.09Fe''0.32Mg1.53Fe'''0.01Ti0.00Al0.09Si1.95O6	55.002	0.015531	2.13971	0.543649	0	10.8771	0	29.0427	2.35363	0.0257329	0	0
2000	1170	0.131364	0.316143	-1662.71	0.040619	0.165514	opx	Na0.00Ca0.09Fe''0.32Mg1.53Fe'''0.01Ti0.00Al0.09Si1.95O6	54.9838	0.0156655	2.13495	0.544928	0	10.9527	0	28.9865	2.35564	0.0258166	0	0
clinopyroxene_0	thermodynamic	data	and	composition:
Pressure	Temperature	mass	S	H	V	Cp	structure	formula	SiO2	TiO2	Al2O3	Fe2O3	Cr2O3	FeO	MnO	MgO	CaO	Na2O	K2O	H2O
2000	1182	0.289098	0.682404	-3703.03	0.089902	0.348493	cpx	Na0.01Ca0.67Fe''0.19Mg1.02Fe'''0.03Ti0.00Al0.16Si1.91O6	52.575	0.046092	3.72343	0.976102	0	6.41011	0	18.8613	17.237	0.171046	0	0
2000	1181	0.305993	0.722013	-3918.09	0.095135	0.368776	cpx	Na0.01Ca0.67Fe''0.20Mg1.02Fe'''0.03Ti0.00Al0.16Si1.91O6	52.5654	0.0468544	3.71924	0.980509	0	6.45914	0	18.8406	17.2165	0.171733	0	0
2000	1180	0.29704	0.700625	-3802.14	0.092332	0.357906	cpx	Na0.01Ca0.67Fe''0.20Mg1.02Fe'''0.03Ti0.00Al0.16Si1.91O6	52.5557	0.0476203	3.71508	0.984904	0	6.50825	0	18.8199	17.1961	0.172418	0	0
2000	1179	0.288443	0.680092	-3690.83	0.08964	0.347469	cpx	Na0.01Ca0.67Fe''0.20Mg1.02Fe'''0.03Ti0.00Al0.16Si1.91O6	52.546	0.0483897	3.71095	0.989288	0	6.55743	0	18.7991	17.1758	0.173101	0	0
2000	1178	0.280184	0.66037	-3583.91	0.087054	0.337443	cpx	Na0.01Ca0.67Fe''0.20Mg1.02Fe'''0.03Ti0.00Al0.16Si1.91O6	52.5363	0.0491627	3.70684	0.993661	0	6.6067	0	18.7781	17.1554	0.173782	0	0
2000	1177	0.272246	0.641418	-3481.16	0.084569	0.327808	cpx	Na0.01Ca0.67Fe''0.20Mg1.02Fe'''0.03Ti0.00Al0.16Si1.91O6	52.5265	0.0499392	3.70276	0.998024	0	6.65605	0	18.7571	17.1351	0.174461	0	0
2000	1176	0.264613	0.623199	-3382.38	0.08218	0.318545	cpx	Na0.01Ca0.67Fe''0.20Mg1.02Fe'''0.03Ti0.00Al0.16Si1.91O6	52.5167	0.0507191	3.6987	1.00238	0	6.7055	0	18.736	17.1149	0.175138	0	0
2000	1175	0.25727	0.605675	-3287.37	0.079881	0.309634	cpx	Na0.01Ca0.67Fe''0.21Mg1.02Fe'''0.03Ti0.00Al0.16Si1.91O6	52.5069	0.0515026	3.69468	1.00672	0	6.75503	0	18.7147	17.0946	0.175814	0	0
2000	1174	0.250203	0.588814	-3195.94	0.07767	0.301059	cpx	Na0.01Ca0.67Fe''0.21Mg1.01Fe'''0.03Ti0.00Al0.16Si1.91O6	52.497	0.0522895	3.69067	1.01106	0	6.80466	0	18.6934	17.0744	0.176488	0	0
2000	1173	0.243399	0.572582	-3107.94	0.075541	0.292804	cpx	Na0.01Ca0.67Fe''0.21Mg1.01Fe'''0.03Ti0.00Al0.16Si1.91O6	52.487	0.0530799	3.6867	1.01539	0	6.85439	0	18.672	17.0543	0.17716	0	0
2000	1172	0.236845	0.556951	-3023.18	0.07349	0.284853	cpx	Na0.01Ca0.66Fe''0.21Mg1.01Fe'''0.03Ti0.00Al0.16Si1.91O6	52.477	0.0538737	3.68274	1.01971	0	6.90422	0	18.6505	17.0341	0.17783	0	0
2000	1171	0.230529	0.541892	-2941.52	0.071515	0.277193	cpx	Na0.01Ca0.66Fe''0.21Mg1.01Fe'''0.03Ti0.00Al0.16Si1.91O6	52.467	0.0546708	3.67881	1.02403	0	6.95416	0	18.6289	17.014	0.1785	0	0
2000	1170	0.224441	0.527379	-2862.82	0.06961	0.269809	cpx	Na0.01Ca0.66Fe''0.21Mg1.01Fe'''0.03Ti0.00Al0.16Si1.91O6	52.4569	0.0554714	3.67491	1.02834	0	7.0042	0	18.6071	16.9939	0.179167	0	0
2000	1169	0.150735	0.354046	-1922.09	0.046741	0.18116	cpx	Na0.01Ca0.66Fe''0.21Mg1.01Fe'''0.03Ti0.00Al0.16Si1.91O6	52.4466	0.056347	3.67143	1.03255	0	7.04716	0	18.581	16.985	0.179915	0	0
2000	1168	0.137534	0.322899	-1753.26	0.042639	0.165247	cpx	Na0.01Ca0.66Fe''0.22Mg1.01Fe'''0.03Ti0.00Al0.16Si1.91O6	52.435	0.0572868	3.66878	1.03715	0	7.08508	0	18.5484	16.9875	0.180751	0	0
2000	1167	0.133419	0.313102	-1700.32	0.041354	0.160258	cpx	Na0.01Ca0.66Fe''0.22Mg1.01Fe'''0.03Ti0.00Al0.16Si1.91O6	52.4234	0.0582348	3.66617	1.04175	0	7.12294	0	18.5158	16.9902	0.181588	0	0
2000	1166	0.129459	0.303677	-1649.39	0.040119	0.155458	cpx	Na0.01Ca0.66Fe''0.22Mg1.01Fe'''0.03Ti0.00Al0.16Si1.91O6	52.4117	0.0591913	3.66359	1.04636	0	7.16075	0	18.483	16.993	0.182428	0	0
2000	1165	0.125647	0.294607	-1600.37	0.038929	0.150838	cpx	Na0.01Ca0.66Fe''0.22Mg1.00Fe'''0.03Ti0.00Al0.16Si1.91O6	52.3999	0.0601562	3.66104	1.05098	0	7.1985	0	18.4501	16.996	0.183269	0	0
2000	1164	0.121976	0.285876	-1553.18	0.037784	0.14639	cpx	Na0.01Ca0.66Fe''0.22Mg1.00Fe'''0.03Ti0.00Al0.16Si1.91O6	52.3882	0.0611298	3.65852	1.0556	0	7.2362	0	18.4171	16.9991	0.184113	0	0
2000	1163	0.11844	0.277467	-1507.73	0.036682	0.142106	cpx	Na0.01Ca0.66Fe''0.22Mg1.00Fe'''0.03Ti0.00Al0.16Si1.91O6	52.3764	0.062112	3.65603	1.06024	0	7.27385	0	18.384	17.0024	0.184959	0	0
2000	1162	0.115033	0.269368	-1463.95	0.035619	0.137979	cpx	Na0.01Ca0.67Fe''0.22Mg1.00Fe'''0.03Ti0.00Al0.16Si1.91O6	52.3645	0.0631029	3.65358	1.06488	0	7.31145	0	18.3508	17.0058	0.185807	0	0
2000	1161	0.111749	0.261564	-1421.76	0.034595	0.134002	cpx	Na0.01Ca0.67Fe''0.22Mg1.00Fe'''0.03Ti0.00Al0.16Si1.91O6	52.3527	0.0641028	3.65115	1.06953	0	7.34902	0	18.3175	17.0094	0.186657	0	0
2000	1160	0.108583	0.254042	-1381.09	0.033608	0.130168	cpx	Na0.01Ca0.67Fe''0.23Mg1.00Fe'''0.03Ti0.00Al0.16Si1.91O6	52.3407	0.0651115	3.64876	1.07419	0	7.38654	0	18.2841	17.0131	0.18751	0	0
2000	1159	0.10553	0.246789	-1341.87	0.032657	0.126471	cpx	Na0.01Ca0.67Fe''0.23Mg0.99Fe'''0.03Ti0.00Al0.16Si1.91O6	52.3287	0.0661294	3.64639	1.07886	0	7.42402	0	18.2505	17.0169	0.188365	0	0
2000	1158	0.102584	0.239795	-1304.05	0.031738	0.122905	cpx	Na0.01Ca0.67Fe''0.23Mg0.99Fe'''0.03Ti0.00Al0.16Si1.91O6	52.3167	0.0671564	3.64406	1.08354	0	7.46146	0	18.2169	17.0209	0.189223	0	0
2000	1157	0.099742	0.233047	-1267.56	0.030853	0.119465	cpx	Na0.01Ca0.67Fe''0.23Mg0.99Fe'''0.03Ti0.00Al0.16Si1.91O6	52.3047	0.0681926	3.64175	1.08824	0	7.49887	0	18.1832	17.025	0.190083	0	0
2000	1156	0.096998	0.226536	-1232.34	0.029998	0.116145	cpx	Na0.01Ca0.67Fe''0.23Mg0.99Fe'''0.03Ti0.00Al0.16Si1.91O6	52.2926	0.0692382	3.63948	1.09294	0	7.53625	0	18.1493	17.0293	0.190946	0	0
2000	1155	0.094349	0.220252	-1198.34	0.029173	0.112941	cpx	Na0.01Ca0.67Fe''0.23Mg0.99Fe'''0.03Ti0.00Al0.16Si1.91O6	52.2804	0.0702932	3.63723	1.09766	0	7.57359	0	18.1154	17.0336	0.191811	0	0
2000	1154	0.09179	0.214184	-1165.52	0.028376	0.109846	cpx	Na0.01Ca0.67Fe''0.23Mg0.99Fe'''0.03Ti0.00Al0.16Si1.91O6	52.2682	0.0713578	3.63501	1.10239	0	7.61091	0	18.0813	17.0381	0.19268	0	0
2000	1153	0.089319	0.208324	-1133.82	0.027606	0.106857	cpx	Na0.01Ca0.67Fe''0.23Mg0.98Fe'''0.03Ti0.00Al0.16Si1.91O6	52.256	0.0724321	3.63283	1.10713	0	7.64821	0	18.0471	17.0428	0.193551	0	0
2000	1152	0.086931	0.202664	-1103.19	0.026862	0.10397	cpx	Na0.01Ca0.67Fe''0.24Mg0.98Fe'''0.03Ti0.00Al0.16Si1.91O6	52.2437	0.0735161	3.63067	1.11188	0	7.68548	0	18.0128	17.0475	0.194425	0	0
2000	1151	0.084623	0.197196	-1073.6	0.026144	0.10118	cpx	Na0.01Ca0.67Fe''0.24Mg0.98Fe'''0.03Ti0.00Al0.16Si1.91O6	52.2314	0.0746101	3.62853	1.11665	0	7.72273	0	17.9784	17.0524	0.195301	0	0
2000	1150	0.082391	0.191911	-1044.99	0.025449	0.098483	cpx	Na0.01Ca0.67Fe''0.24Mg0.98Fe'''0.03Ti0.00Al0.16Si1.91O6	52.219	0.075714	3.62643	1.12143	0	7.75996	0	17.9439	17.0573	0.196181	0	0
2000	1149	0.080234	0.186802	-1017.34	0.024778	0.095876	cpx	Na0.01Ca0.67Fe''0.24Mg0.98Fe'''0.03Ti0.00Al0.16Si1.91O6	52.2066	0.0768281	3.62435	1.12623	0	7.79717	0	17.9093	17.0624	0.197064	0	0
2000	1148	0.078147	0.181862	-990.599	0.024128	0.093355	cpx	Na0.01Ca0.67Fe''0.24Mg0.98Fe'''0.03Ti0.00Al0.16Si1.91O6	52.1941	0.0779524	3.62231	1.13104	0	7.83437	0	17.8746	17.0676	0.197949	0	0
2000	1147	0.076128	0.177085	-964.736	0.0235	0.090917	cpx	Na0.01Ca0.67Fe''0.24Mg0.97Fe'''0.03Ti0.00Al0.16Si1.91O6	52.1816	0.079087	3.62029	1.13587	0	7.87155	0	17.8398	17.073	0.198838	0	0
2000	1146	0.074175	0.172464	-939.716	0.022892	0.088558	cpx	Na0.01Ca0.67Fe''0.24Mg0.97Fe'''0.03Ti0.00Al0.16Si1.91O6	52.169	0.0802321	3.61829	1.14072	0	7.90873	0	17.8049	17.0784	0.19973	0	0
2000	1145	0.072285	0.167993	-915.506	0.022304	0.086275	cpx	Na0.01Ca0.67Fe''0.24Mg0.97Fe'''0.03Ti0.00Al0.16Si1.91O6	52.1564	0.0813878	3.61633	1.14558	0	7.9459	0	17.7698	17.0839	0.200625	0	0
2000	1144	0.070455	0.163666	-892.074	0.021735	0.084066	cpx	Na0.01Ca0.67Fe''0.24Mg0.97Fe'''0.03Ti0.00Al0.16Si1.91O6	52.1438	0.0825543	3.61439	1.15046	0	7.98307	0	17.7347	17.0896	0.201524	0	0
2000	1143	0.068683	0.159478	-869.391	0.021184	0.081927	cpx	Na0.01Ca0.67Fe''0.25Mg0.97Fe'''0.03Ti0.00Al0.16Si1.91O6	52.131	0.0837315	3.61247	1.15536	0	8.02023	0	17.6995	17.0953	0.202426	0	0
2000	1142	0.066967	0.155423	-847.428	0.020651	0.079857	cpx	Na0.01Ca0.67Fe''0.25Mg0.97Fe'''0.03Ti0.00Al0.16Si1.91O6	52.1183	0.0849198	3.61059	1.16027	0	8.05739	0	17.6641	17.1011	0.203331	0	0
2000	1141	0.065305	0.151497	-826.158	0.020134	0.077851	cpx	Na0.01Ca0.67Fe''0.25Mg0.96Fe'''0.03Ti0.00Al0.16Si1.91O6	52.1055	0.0861192	3.60873	1.1652	0	8.09455	0	17.6286	17.1071	0.204239	0	0
2000	1140	0.063695	0.147695	-805.556	0.019633	0.075909	cpx	Na0.01Ca0.67Fe''0.25Mg0.96Fe'''0.03Ti0.00Al0.16Si1.91O6	52.0926	0.0873298	3.60689	1.17016	0	8.13171	0	17.5931	17.1131	0.205151	0	0
2000	1139	0.062134	0.144011	-785.596	0.019148	0.074027	cpx	Na0.01Ca0.67Fe''0.25Mg0.96Fe'''0.03Ti0.00Al0.16Si1.91O6	52.0797	0.0885517	3.60509	1.17513	0	8.16888	0	17.5574	17.1192	0.206066	0	0
2000	1138	0.060622	0.140442	-766.254	0.018679	0.072203	cpx	Na0.01Ca0.67Fe''0.25Mg0.96Fe'''0.03Ti0.00Al0.16Si1.91O6	52.0667	0.0897852	3.60331	1.18012	0	8.20606	0	17.5216	17.1255	0.206985	0	0
2000	1137	0.059156	0.136983	-747.508	0.018223	0.070436	cpx	Na0.01Ca0.67Fe''0.25Mg0.96Fe'''0.03Ti0.00Al0.16Si1.91O6	52.0537	0.0910303	3.60155	1.18513	0	8.24325	0	17.4857	17.1318	0.207908	0	0
2000	1136	0.057735	0.133631	-729.337	0.017781	0.068723	cpx	Na0.01Ca0.67Fe''0.25Mg0.96Fe'''0.03Ti0.00Al0.16Si1.91O6	52.0406	0.0922872	3.59982	1.19016	0	8.28046	0	17.4497	17.1382	0.208834	0	0
2000	1135	0.056356	0.130381	-711.718	0.017353	0.067062	cpx	Na0.01Ca0.67Fe''0.26Mg0.95Fe'''0.03Ti0.00Al0.16Si1.91O6	52.0275	0.0935561	3.59812	1.19522	0	8.31768	0	17.4135	17.1446	0.209764	0	0
2000	1134	0.055019	0.12723	-694.633	0.016938	0.065451	cpx	Na0.02Ca0.67Fe''0.26Mg0.95Fe'''0.03Ti0.00Al0.16Si1.91O6	52.0143	0.094837	3.59644	1.2003	0	8.35491	0	17.3773	17.1512	0.210697	0	0
2000	1133	0.053723	0.124174	-678.063	0.016535	0.063888	cpx	Na0.02Ca0.68Fe''0.26Mg0.95Fe'''0.03Ti0.00Al0.16Si1.91O6	52.0011	0.0961301	3.59479	1.20539	0	8.39217	0	17.3409	17.1579	0.211634	0	0
2000	1132	0.052464	0.12121	-661.988	0.016145	0.062373	cpx	Na0.02Ca0.68Fe''0.26Mg0.95Fe'''0.03Ti0.00Al0.16Si1.91O6	51.9878	0.0974356	3.59316	1.21052	0	8.42944	0	17.3045	17.1646	0.212575	0	0
2000	1131	0.051243	0.118335	-646.393	0.015766	0.060903	cpx	Na0.02Ca0.68Fe''0.26Mg0.95Fe'''0.03Ti0.00Al0.16Si1.91O6	51.9744	0.0987537	3.59156	1.21566	0	8.46675	0	17.2679	17.1714	0.21352	0	0
2000	1130	0.050058	0.115545	-631.259	0.015398	0.059476	cpx	Na0.02Ca0.68Fe''0.26Mg0.94Fe'''0.03Ti0.00Al0.16Si1.91O6	51.961	0.100084	3.58998	1.22083	0	8.50408	0	17.2312	17.1783	0.214469	0	0
2000	1129	0.048908	0.112837	-616.571	0.015041	0.058091	cpx	Na0.02Ca0.68Fe''0.26Mg0.94Fe'''0.03Ti0.00Al0.16Si1.91O6	51.9476	0.101428	3.58843	1.22602	0	8.54143	0	17.1944	17.1853	0.215422	0	0
2000	1128	0.047791	0.110209	-602.313	0.014694	0.056747	cpx	Na0.02Ca0.68Fe''0.26Mg0.94Fe'''0.03Ti0.00Al0.16Si1.91O6	51.934	0.102785	3.58691	1.23124	0	8.57882	0	17.1575	17.1923	0.216378	0	0
2000	1127	0.046706	0.107659	-588.47	0.014358	0.055442	cpx	Na0.02Ca0.68Fe''0.27Mg0.94Fe'''0.03Ti0.00Al0.16Si1.91O6	51.9204	0.104154	3.58541	1.23648	0	8.61625	0	17.1205	17.1994	0.217339	0	0
2000	1126	0.045653	0.105182	-575.029	0.014031	0.054174	cpx	Na0.02Ca0.68Fe''0.27Mg0.94Fe'''0.03Ti0.00Al0.16Si1.91O6	51.9068	0.105537	3.58393	1.24175	0	8.65371	0	17.0834	17.2066	0.218303	0	0
2000	1125	0.04463	0.102777	-561.976	0.013713	0.052944	cpx	Na0.02Ca0.68Fe''0.27Mg0.94Fe'''0.03Ti0.00Al0.16Si1.91O6	51.8931	0.106934	3.58248	1.24705	0	8.6912	0	17.0461	17.2138	0.219272	0	0
2000	1124	0.043636	0.100441	-549.297	0.013405	0.051748	cpx	Na0.02Ca0.68Fe''0.27Mg0.93Fe'''0.03Ti0.00Al0.16Si1.91O6	51.8793	0.108344	3.58105	1.25237	0	8.72874	0	17.0088	17.2211	0.220245	0	0
2000	1123	0.04267	0.098173	-536.98	0.013106	0.050587	cpx	Na0.02Ca0.68Fe''0.27Mg0.93Fe'''0.03Ti0.00Al0.16Si1.91O6	51.8655	0.109768	3.57965	1.25772	0	8.76633	0	16.9713	17.2285	0.221222	0	0
2000	1122	0.041732	0.095969	-525.012	0.012815	0.049459	cpx	Na0.02Ca0.68Fe''0.27Mg0.93Fe'''0.04Ti0.00Al0.16Si1.91O6	51.8516	0.111206	3.57828	1.2631	0	8.80396	0	16.9337	17.2359	0.222203	0	0
2000	1121	0.04082	0.093828	-513.383	0.012532	0.048363	cpx	Na0.02Ca0.68Fe''0.27Mg0.93Fe'''0.04Ti0.00Al0.16Si1.91O6	51.8377	0.112658	3.57692	1.2685	0	8.84163	0	16.896	17.2434	0.223189	0	0
2000	1120	0.039933	0.091747	-502.082	0.012257	0.047297	cpx	Na0.02Ca0.68Fe''0.27Mg0.93Fe'''0.04Ti0.00Al0.16Si1.91O6	51.8237	0.114125	3.5756	1.27394	0	8.87936	0	16.8582	17.2509	0.224179	0	0
2000	1119	0.039071	0.089724	-491.096	0.01199	0.046262	cpx	Na0.02Ca0.68Fe''0.27Mg0.92Fe'''0.04Ti0.00Al0.16Si1.91O6	51.8096	0.115606	3.57429	1.2794	0	8.91714	0	16.8202	17.2585	0.225173	0	0
2000	1118	0.038233	0.087759	-480.416	0.01173	0.045255	cpx	Na0.02Ca0.68Fe''0.28Mg0.92Fe'''0.04Ti0.00Al0.16Si1.91O6	51.7954	0.117102	3.57301	1.28489	0	8.95498	0	16.7822	17.2662	0.226172	0	0
2000	1117	0.037418	0.085848	-470.033	0.011478	0.044276	cpx	Na0.02Ca0.68Fe''0.28Mg0.92Fe'''0.04Ti0.00Al0.16Si1.91O6	51.7812	0.118613	3.57176	1.29042	0	8.99287	0	16.744	17.2739	0.227175	0	0
2000	1116	0.036626	0.08399	-459.935	0.011232	0.043324	cpx	Na0.02Ca0.68Fe''0.28Mg0.92Fe'''0.04Ti0.00Al0.16Si1.91O6	51.767	0.120139	3.57053	1.29597	0	9.03083	0	16.7057	17.2817	0.228182	0	0
2000	1115	0.035855	0.082183	-450.116	0.010993	0.042399	cpx	Na0.02Ca0.68Fe''0.28Mg0.92Fe'''0.04Ti0.00Al0.16Si1.91O6	51.7526	0.12168	3.56933	1.30156	0	9.06884	0	16.6673	17.2895	0.229194	0	0
2000	1114	0.035105	0.080426	-440.564	0.010761	0.041498	cpx	Na0.02Ca0.68Fe''0.28Mg0.91Fe'''0.04Ti0.00Al0.16Si1.91O6	51.7382	0.123237	3.56815	1.30718	0	9.10693	0	16.6288	17.2973	0.230211	0	0
2000	1113	0.034375	0.078716	-431.272	0.010535	0.040622	cpx	Na0.02Ca0.68Fe''0.28Mg0.91Fe'''0.04Ti0.00Al0.16Si1.91O6	51.7237	0.124809	3.56699	1.31283	0	9.14508	0	16.5901	17.3052	0.231232	0	0
2000	1112	0.033665	0.077054	-422.232	0.010315	0.03977	cpx	Na0.02Ca0.68Fe''0.28Mg0.91Fe'''0.04Ti0.00Al0.16Si1.91O6	51.7092	0.126398	3.56586	1.31851	0	9.1833	0	16.5513	17.3132	0.232258	0	0
2000	1111	0.032974	0.075436	-413.436	0.010101	0.038941	cpx	Na0.02Ca0.69Fe''0.28Mg0.91Fe'''0.04Ti0.00Al0.16Si1.91O6	51.6945	0.128002	3.56475	1.32423	0	9.2216	0	16.5124	17.3212	0.233288	0	0
2000	1110	0.032301	0.073862	-404.875	0.009893	0.038134	cpx	Na0.02Ca0.69Fe''0.29Mg0.91Fe'''0.04Ti0.00Al0.16Si1.91O6	51.6798	0.129623	3.56367	1.32998	0	9.25997	0	16.4734	17.3292	0.234323	0	0
2000	1109	0.031646	0.072331	-396.544	0.00969	0.037349	cpx	Na0.02Ca0.69Fe''0.29Mg0.91Fe'''0.04Ti0.00Al0.16Si1.91O6	51.6651	0.131261	3.56261	1.33577	0	9.29842	0	16.4342	17.3373	0.235363	0	0
2000	1108	0.031009	0.07084	-388.434	0.009493	0.036585	cpx	Na0.02Ca0.69Fe''0.29Mg0.90Fe'''0.04Ti0.00Al0.16Si1.91O6	51.6502	0.132915	3.56158	1.3416	0	9.33695	0	16.3949	17.3454	0.236408	0	0
2000	1107	0.030388	0.069389	-380.539	0.009301	0.035841	cpx	Na0.02Ca0.69Fe''0.29Mg0.90Fe'''0.04Ti0.00Al0.16Si1.91O6	51.6353	0.134587	3.56057	1.34745	0	9.37557	0	16.3555	17.3535	0.237458	0	0
2000	1106	0.029784	0.067976	-372.852	0.009114	0.035116	cpx	Na0.02Ca0.69Fe''0.29Mg0.90Fe'''0.04Ti0.00Al0.16Si1.91O6	51.6203	0.136275	3.55959	1.35335	0	9.41427	0	16.316	17.3617	0.238513	0	0
2000	1105	0.029195	0.066601	-365.366	0.008932	0.034411	cpx	Na0.02Ca0.69Fe''0.29Mg0.90Fe'''0.04Ti0.00Al0.16Si1.91O6	51.6052	0.137981	3.55863	1.35928	0	9.45306	0	16.2763	17.3699	0.239572	0	0
2000	1104	0.028622	0.065262	-358.077	0.008754	0.033724	cpx	Na0.02Ca0.69Fe''0.29Mg0.90Fe'''0.04Ti0.00Al0.16Si1.91O6	51.5901	0.139705	3.55769	1.36526	0	9.49194	0	16.2365	17.3781	0.240637	0	0
2000	1103	0.028063	0.063958	-350.977	0.008582	0.033055	cpx	Na0.02Ca0.69Fe''0.29Mg0.89Fe'''0.04Ti0.00Al0.16Si1.91O6	51.5749	0.141446	3.55678	1.37127	0	9.53092	0	16.1966	17.3864	0.241707	0	0
2000	1102	0.027519	0.062688	-344.062	0.008413	0.032403	cpx	Na0.02Ca0.69Fe''0.30Mg0.89Fe'''0.04Ti0.00Al0.16Si1.91O6	51.5596	0.143206	3.5559	1.37731	0	9.56999	0	16.1566	17.3947	0.242781	0	0
2000	1101	0.026989	0.06145	-337.324	0.008249	0.031768	cpx	Na0.02Ca0.69Fe''0.30Mg0.89Fe'''0.04Ti0.00Al0.16Si1.91O6	51.5442	0.144984	3.55504	1.3834	0	9.60916	0	16.1164	17.403	0.243861	0	0
2000	1100	0.026473	0.060245	-330.761	0.00809	0.03115	cpx	Na0.02Ca0.69Fe''0.30Mg0.89Fe'''0.04Ti0.00Al0.16Si1.91O6	51.5287	0.146781	3.5542	1.38953	0	9.64844	0	16.076	17.4114	0.244946	0	0
2000	1099	0.025969	0.059071	-324.365	0.007934	0.030547	cpx	Na0.02Ca0.69Fe''0.30Mg0.89Fe'''0.04Ti0.00Al0.16Si1.91O6	51.5131	0.148597	3.55339	1.3957	0	9.68782	0	16.0356	17.4197	0.246037	0	0
2000	1098	0.025479	0.057927	-318.132	0.007782	0.02996	cpx	Na0.02Ca0.69Fe''0.30Mg0.88Fe'''0.04Ti0.00Al0.16Si1.91O6	51.4975	0.150432	3.5526	1.40192	0	9.72731	0	15.995	17.4281	0.247132	0	0
2000	1097	0.025	0.056812	-312.057	0.007634	0.029387	cpx	Na0.02Ca0.69Fe''0.30Mg0.88Fe'''0.04Ti0.00Al0.16Si1.91O6	51.4818	0.152287	3.55184	1.40817	0	9.76691	0	15.9543	17.4365	0.248233	0	0
2000	1096	0.024534	0.055726	-306.137	0.00749	0.02883	cpx	Na0.02Ca0.69Fe''0.30Mg0.88Fe'''0.04Ti0.00Al0.16Si1.91O6	51.466	0.154161	3.55111	1.41447	0	9.80662	0	15.9134	17.4449	0.249339	0	0
2000	1095	0.02408	0.054667	-300.365	0.00735	0.028286	cpx	Na0.02Ca0.69Fe''0.31Mg0.88Fe'''0.04Ti0.00Al0.16Si1.91O6	51.4501	0.156055	3.5504	1.42081	0	9.84645	0	15.8724	17.4534	0.250451	0	0
2000	1094	0.023637	0.053635	-294.738	0.007213	0.027756	cpx	Na0.02Ca0.69Fe''0.31Mg0.88Fe'''0.04Ti0.00Al0.16Si1.91O6	51.4341	0.15797	3.54971	1.4272	0	9.8864	0	15.8312	17.4618	0.251568	0	0
2000	1093	0.023204	0.052628	-289.252	0.007079	0.027239	cpx	Na0.02Ca0.69Fe''0.31Mg0.87Fe'''0.04Ti0.00Al0.16Si1.91O6	51.418	0.159905	3.54905	1.43363	0	9.92647	0	15.7899	17.4703	0.252691	0	0
2000	1092	0.022783	0.051647	-283.903	0.006949	0.026735	cpx	Na0.02Ca0.69Fe''0.31Mg0.87Fe'''0.04Ti0.00Al0.16Si1.91O6	51.4018	0.161861	3.54841	1.4401	0	9.96666	0	15.7485	17.4788	0.253819	0	0
2000	1091	0.022372	0.050691	-278.686	0.006822	0.026244	cpx	Na0.02Ca0.70Fe''0.31Mg0.87Fe'''0.04Ti0.00Al0.16Si1.91O6	51.3856	0.163838	3.5478	1.44663	0	10.007	0	15.7069	17.4873	0.254953	0	0
2000	1090	0.021971	0.049758	-273.598	0.006698	0.025764	cpx	Na0.02Ca0.70Fe''0.31Mg0.87Fe'''0.04Ti0.00Al0.16Si1.91O6	51.3692	0.165836	3.54722	1.4532	0	10.0474	0	15.6652	17.4958	0.256093	0	0
2000	1089	0.02158	0.048848	-268.635	0.006578	0.025297	cpx	Na0.02Ca0.70Fe''0.31Mg0.86Fe'''0.04Ti0.00Al0.16Si1.91O6	51.3528	0.167856	3.54666	1.45982	0	10.088	0	15.6233	17.5043	0.257238	0	0
2000	1088	0.021198	0.047961	-263.795	0.00646	0.024841	cpx	Na0.02Ca0.70Fe''0.31Mg0.86Fe'''0.04Ti0.00Al0.16Si1.91O6	51.3362	0.169898	3.54613	1.46649	0	10.1288	0	15.5813	17.5128	0.25839	0	0
2000	1087	0.020826	0.047096	-259.072	0.006345	0.024396	cpx	Na0.02Ca0.70Fe''0.32Mg0.86Fe'''0.04Ti0.00Al0.16Si1.91O6	51.3196	0.171963	3.54562	1.47321	0	10.1696	0	15.5391	17.5213	0.259547	0	0
2000	1086	0.020463	0.046251	-254.464	0.006233	0.023962	cpx	Na0.02Ca0.70Fe''0.32Mg0.86Fe'''0.04Ti0.00Al0.16Si1.91O6	51.3029	0.17405	3.54514	1.47998	0	10.2106	0	15.4968	17.5298	0.26071	0	0
2000	1085	0.020108	0.045428	-249.969	0.006123	0.023539	cpx	Na0.02Ca0.70Fe''0.32Mg0.86Fe'''0.04Ti0.00Al0.16Si1.91O6	51.286	0.176161	3.54468	1.4868	0	10.2518	0	15.4543	17.5384	0.261878	0	0
2000	1084	0.019763	0.044624	-245.581	0.006017	0.023126	cpx	Na0.02Ca0.70Fe''0.32Mg0.85Fe'''0.04Ti0.00Al0.16Si1.91O6	51.2691	0.178294	3.54425	1.49367	0	10.2931	0	15.4117	17.5469	0.263053	0	0
2000	1083	0.019425	0.04384	-241.3	0.005912	0.022722	cpx	Na0.02Ca0.70Fe''0.32Mg0.85Fe'''0.04Ti0.01Al0.16Si1.91O6	51.2521	0.180451	3.54385	1.5006	0	10.3345	0	15.3689	17.5554	0.264234	0	0
2000	1082	0.019095	0.043075	-237.121	0.005811	0.022329	cpx	Na0.02Ca0.70Fe''0.32Mg0.85Fe'''0.04Ti0.01Al0.16Si1.91O6	51.2349	0.182633	3.54347	1.50758	0	10.3761	0	15.3259	17.5639	0.265421	0	0
2000	1081	0.018774	0.042328	-233.042	0.005711	0.021945	cpx	Na0.02Ca0.70Fe''0.32Mg0.85Fe'''0.04Ti0.01Al0.16Si1.91O6	51.2177	0.184838	3.54312	1.51461	0	10.4179	0	15.2828	17.5724	0.266614	0	0
2000	1080	0.01846	0.0416	-229.061	0.005614	0.02157	cpx	Na0.02Ca0.70Fe''0.33Mg0.85Fe'''0.04Ti0.01Al0.16Si1.91O6	51.2003	0.187069	3.5428	1.5217	0	10.4598	0	15.2396	17.5809	0.267814	0	0
2000	1079	0.018153	0.040888	-225.174	0.00552	0.021204	cpx	Na0.02Ca0.70Fe''0.33Mg0.84Fe'''0.04Ti0.01Al0.16Si1.91O6	51.1828	0.189324	3.5425	1.52884	0	10.5019	0	15.1961	17.5894	0.26902	0	0
2000	1078	0.017854	0.040194	-221.379	0.005427	0.020847	cpx	Na0.02Ca0.70Fe''0.33Mg0.84Fe'''0.04Ti0.01Al0.16Si1.91O6	51.1653	0.191605	3.54223	1.53605	0	10.5442	0	15.1525	17.5979	0.270232	0	0
2000	1077	0.017561	0.039516	-217.673	0.005337	0.020498	cpx	Na0.02Ca0.70Fe''0.33Mg0.84Fe'''0.04Ti0.01Al0.16Si1.91O6	51.1476	0.193912	3.54199	1.54331	0	10.5866	0	15.1088	17.6064	0.27145	0	0
2000	1076	0.017276	0.038854	-214.055	0.005249	0.020157	cpx	Na0.02Ca0.70Fe''0.33Mg0.84Fe'''0.04Ti0.01Al0.16Si1.90O6	51.1298	0.196244	3.54177	1.55063	0	10.6292	0	15.0648	17.6148	0.272675	0	0
2000	1075	0.016997	0.038208	-210.521	0.005163	0.019825	cpx	Na0.02Ca0.70Fe''0.33Mg0.83Fe'''0.04Ti0.01Al0.16Si1.90O6	51.1119	0.198604	3.54159	1.55801	0	10.672	0	15.0207	17.6233	0.273906	0	0
2000	1074	0.016725	0.037576	-207.07	0.005079	0.0195	cpx	Na0.02Ca0.70Fe''0.33Mg0.83Fe'''0.04Ti0.01Al0.16Si1.90O6	51.0938	0.20099	3.54142	1.56545	0	10.715	0	14.9765	17.6317	0.275144	0	0
2000	1073	0.016459	0.03696	-203.699	0.004997	0.019183	cpx	Na0.02Ca0.70Fe''0.34Mg0.83Fe'''0.04Ti0.01Al0.16Si1.90O6	51.0757	0.203404	3.54129	1.57295	0	10.7581	0	14.932	17.6402	0.276389	0	0
2000	1072	0.016199	0.036358	-200.407	0.004917	0.018873	cpx	Na0.02Ca0.71Fe''0.34Mg0.83Fe'''0.04Ti0.01Al0.16Si1.90O6	51.0574	0.205846	3.54118	1.58052	0	10.8014	0	14.8874	17.6486	0.27764	0	0
2000	1071	0.015945	0.03577	-197.191	0.004839	0.01857	cpx	Na0.02Ca0.71Fe''0.34Mg0.83Fe'''0.04Ti0.01Al0.16Si1.90O6	51.039	0.208315	3.54111	1.58815	0	10.845	0	14.8426	17.657	0.278899	0	0
2000	1070	0.015697	0.035196	-194.048	0.004762	0.018274	cpx	Na0.02Ca0.71Fe''0.34Mg0.82Fe'''0.04Ti0.01Al0.16Si1.90O6	51.0205	0.210814	3.54106	1.59584	0	10.8887	0	14.7976	17.6653	0.280164	0	0
2000	1069	0.015455	0.034635	-190.979	0.004688	0.017985	cpx	Na0.02Ca0.71Fe''0.34Mg0.82Fe'''0.05Ti0.01Al0.16Si1.90O6	51.0019	0.213341	3.54104	1.6036	0	10.9326	0	14.7524	17.6737	0.281435	0	0
2000	1068	0.015218	0.034087	-187.979	0.004615	0.017703	cpx	Na0.02Ca0.71Fe''0.34Mg0.82Fe'''0.05Ti0.01Al0.16Si1.90O6	50.9831	0.215898	3.54104	1.61143	0	10.9767	0	14.7071	17.682	0.282714	0	0
2000	1067	0.014986	0.033552	-185.048	0.004543	0.017427	cpx	Na0.02Ca0.71Fe''0.34Mg0.82Fe'''0.05Ti0.01Al0.16Si1.90O6	50.9642	0.218486	3.54108	1.61933	0	11.021	0	14.6615	17.6903	0.284	0	0
2000	1066	0.01476	0.033029	-182.184	0.004474	0.017158	cpx	Na0.02Ca0.71Fe''0.35Mg0.81Fe'''0.05Ti0.01Al0.16Si1.90O6	50.9452	0.221103	3.54114	1.62729	0	11.0656	0	14.6158	17.6986	0.285293	0	0
2000	1065	0.014539	0.032518	-179.385	0.004405	0.016895	cpx	Na0.02Ca0.71Fe''0.35Mg0.81Fe'''0.05Ti0.01Al0.16Si1.90O6	50.9261	0.223751	3.54124	1.63532	0	11.1103	0	14.5699	17.7068	0.286593	0	0
2000	1064	0.014462	0.032329	-178.362	0.004381	0.016799	cpx	Na0.02Ca0.71Fe''0.35Mg0.81Fe'''0.05Ti0.01Al0.16Si1.90O6	50.9069	0.226422	3.54132	1.64339	0	11.1551	0	14.5239	17.715	0.287898	0	0
2000	1063	0.014358	0.032079	-177.002	0.004348	0.016671	cpx	Na0.02Ca0.71Fe''0.35Mg0.81Fe'''0.05Ti0.01Al0.16Si1.90O6	50.8876	0.229117	3.5414	1.65149	0	11.2001	0	14.4778	17.7232	0.289207	0	0
2000	1062	0.014152	0.031604	-174.401	0.004285	0.016426	cpx	Na0.02Ca0.71Fe''0.35Mg0.80Fe'''0.05Ti0.01Al0.16Si1.90O6	50.8682	0.231842	3.54151	1.65966	0	11.2453	0	14.4315	17.7314	0.290524	0	0
2000	1061	0.01395	0.031137	-171.841	0.004223	0.016186	cpx	Na0.02Ca0.71Fe''0.35Mg0.80Fe'''0.05Ti0.01Al0.16Si1.90O6	50.8487	0.234599	3.54164	1.6679	0	11.2907	0	14.3851	17.7396	0.291848	0	0
2000	1060	0.013752	0.030679	-169.329	0.004161	0.015949	cpx	Na0.02Ca0.71Fe''0.35Mg0.80Fe'''0.05Ti0.01Al0.16Si1.90O6	50.829	0.237388	3.5418	1.67622	0	11.3363	0	14.3384	17.7477	0.29318	0	0
2000	1059	0.013558	0.030231	-166.874	0.004102	0.015718	cpx	Na0.02Ca0.71Fe''0.36Mg0.80Fe'''0.05Ti0.01Al0.16Si1.90O6	50.8092	0.240209	3.54199	1.68461	0	11.3821	0	14.2915	17.7558	0.294518	0	0
2000	1058	0.013369	0.029793	-164.475	0.004043	0.015493	cpx	Na0.02Ca0.71Fe''0.36Mg0.80Fe'''0.05Ti0.01Al0.16Si1.90O6	50.7893	0.243064	3.54221	1.69308	0	11.4282	0	14.2445	17.7638	0.295864	0	0
2000	1057	0.013184	0.029366	-162.13	0.003986	0.015272	cpx	Na0.02Ca0.71Fe''0.36Mg0.79Fe'''0.05Ti0.01Al0.16Si1.90O6	50.7692	0.245952	3.54246	1.70162	0	11.4745	0	14.1972	17.7718	0.297218	0	0
2000	1056	0.013003	0.028948	-159.839	0.003931	0.015057	cpx	Na0.02Ca0.71Fe''0.36Mg0.79Fe'''0.05Ti0.01Al0.16Si1.90O6	50.749	0.248874	3.54274	1.71024	0	11.521	0	14.1497	17.7798	0.29858	0	0
2000	1055	0.012826	0.02854	-157.599	0.003876	0.014846	cpx	Na0.02Ca0.71Fe''0.36Mg0.79Fe'''0.05Ti0.01Al0.16Si1.90O6	50.7286	0.25183	3.54304	1.71894	0	11.5678	0	14.1021	17.7877	0.299949	0	0
2000	1054	0.012654	0.028141	-155.411	0.003823	0.014641	cpx	Na0.02Ca0.71Fe''0.36Mg0.79Fe'''0.05Ti0.01Al0.16Si1.90O6	50.7081	0.254822	3.54337	1.72771	0	11.6148	0	14.0542	17.7956	0.301325	0	0
2000	1053	0.012485	0.027751	-153.272	0.003771	0.01444	cpx	Na0.02Ca0.72Fe''0.37Mg0.78Fe'''0.05Ti0.01Al0.16Si1.90O6	50.6875	0.257849	3.54373	1.73657	0	11.6621	0	14.0061	17.8035	0.30271	0	0
2000	1052	0.01232	0.02737	-151.182	0.00372	0.014243	cpx	Na0.02Ca0.72Fe''0.37Mg0.78Fe'''0.05Ti0.01Al0.16Si1.90O6	50.6667	0.260911	3.54412	1.74552	0	11.7096	0	13.9578	17.8113	0.304103	0	0
2000	1051	0.012159	0.026998	-149.139	0.00367	0.014051	cpx	Na0.02Ca0.72Fe''0.37Mg0.78Fe'''0.05Ti0.01Al0.16Si1.90O6	50.6457	0.264011	3.54454	1.75454	0	11.7574	0	13.9093	17.819	0.305503	0	0
2000	1050	0.012002	0.026634	-147.142	0.003622	0.013864	cpx	Na0.02Ca0.72Fe''0.37Mg0.78Fe'''0.05Ti0.01Al0.16Si1.90O6	50.6246	0.267147	3.54499	1.76365	0	11.8054	0	13.8606	17.8267	0.306912	0	0
2000	1049	0.011848	0.026279	-145.191	0.003574	0.01368	cpx	Na0.02Ca0.72Fe''0.37Mg0.77Fe'''0.05Ti0.01Al0.16Si1.90O6	50.6033	0.270321	3.54547	1.77285	0	11.8537	0	13.8116	17.8344	0.308328	0	0
2000	1048	0.011697	0.025932	-143.285	0.003528	0.013501	cpx	Na0.02Ca0.72Fe''0.37Mg0.77Fe'''0.05Ti0.01Al0.16Si1.90O6	50.5819	0.273532	3.54598	1.78213	0	11.9023	0	13.7625	17.842	0.309753	0	0
2000	1047	0.01155	0.025593	-141.421	0.003483	0.013326	cpx	Na0.02Ca0.72Fe''0.38Mg0.77Fe'''0.05Ti0.01Al0.16Si1.90O6	50.5603	0.276783	3.54651	1.7915	0	11.9511	0	13.7131	17.8495	0.311186	0	0
2000	1046	0.011407	0.025262	-139.6	0.003439	0.013155	cpx	Na0.02Ca0.72Fe''0.38Mg0.77Fe'''0.05Ti0.01Al0.16Si1.90O6	50.5386	0.280072	3.54708	1.80096	0	12.0002	0	13.6634	17.857	0.312627	0	0
2000	1045	0.011267	0.024938	-137.821	0.003395	0.012988	cpx	Na0.02Ca0.72Fe''0.38Mg0.76Fe'''0.05Ti0.01Al0.16Si1.90O6	50.5166	0.2834	3.54767	1.81052	0	12.0496	0	13.6136	17.8645	0.314076	0	0
2000	1044	0.01113	0.024622	-136.083	0.003353	0.012825	cpx	Na0.02Ca0.72Fe''0.38Mg0.76Fe'''0.05Ti0.01Al0.16Si1.90O6	50.4946	0.286769	3.5483	1.82016	0	12.0993	0	13.5635	17.8719	0.315534	0	0
2000	1043	0.010996	0.024313	-134.384	0.003312	0.012666	cpx	Na0.02Ca0.72Fe''0.38Mg0.76Fe'''0.05Ti0.01Al0.16Si1.90O6	50.4723	0.290178	3.54895	1.8299	0	12.1492	0	13.5132	17.8792	0.317001	0	0
2000	1042	0.010865	0.024011	-132.724	0.003271	0.01251	cpx	Na0.02Ca0.72Fe''0.38Mg0.76Fe'''0.05Ti0.01Al0.16Si1.90O6	50.4499	0.293628	3.54964	1.83973	0	12.1994	0	13.4627	17.8865	0.318476	0	0
2000	1041	0.010738	0.023716	-131.103	0.003232	0.012358	cpx	Na0.02Ca0.72Fe''0.39Mg0.75Fe'''0.05Ti0.01Al0.16Si1.90O6	50.4273	0.29712	3.55035	1.84966	0	12.25	0	13.4119	17.8937	0.319959	0	0
2000	1040	0.010613	0.023429	-129.519	0.003194	0.012209	cpx	Na0.02Ca0.72Fe''0.39Mg0.75Fe'''0.05Ti0.01Al0.16Si1.90O6	50.4046	0.300654	3.55109	1.85969	0	12.3008	0	13.3609	17.9009	0.321452	0	0
2000	1039	0.010491	0.023148	-127.972	0.003156	0.012064	cpx	Na0.02Ca0.72Fe''0.39Mg0.75Fe'''0.05Ti0.01Al0.16Si1.90O6	50.3817	0.30423	3.55186	1.86981	0	12.3519	0	13.3097	17.908	0.322953	0	0
2000	1038	0.010373	0.022873	-126.461	0.003119	0.011922	cpx	Na0.02Ca0.72Fe''0.39Mg0.74Fe'''0.05Ti0.01Al0.16Si1.90O6	50.3586	0.307849	3.55266	1.88003	0	12.4033	0	13.2582	17.915	0.324463	0	0
2000	1037	0.010257	0.022605	-124.986	0.003084	0.011784	cpx	Na0.02Ca0.72Fe''0.39Mg0.74Fe'''0.05Ti0.01Al0.16Si1.90O6	50.3353	0.311512	3.55349	1.89036	0	12.455	0	13.2064	17.922	0.325981	0	0
2000	1036	0.010143	0.022344	-123.545	0.003049	0.011649	cpx	Na0.02Ca0.72Fe''0.39Mg0.74Fe'''0.05Ti0.01Al0.16Si1.90O6	50.3118	0.315219	3.55435	1.90079	0	12.507	0	13.1544	17.9289	0.327509	0	0
2000	1035	0.010033	0.022088	-122.138	0.003015	0.011517	cpx	Na0.02Ca0.72Fe''0.40Mg0.74Fe'''0.05Ti0.01Al0.16Si1.90O6	50.2882	0.318971	3.55524	1.91132	0	12.5594	0	13.1022	17.9357	0.329046	0	0
2000	1034	0.009925	0.021839	-120.764	0.002981	0.011388	cpx	Na0.02Ca0.73Fe''0.40Mg0.73Fe'''0.05Ti0.01Al0.16Si1.90O6	50.2643	0.322767	3.55616	1.92196	0	12.612	0	13.0497	17.9425	0.330591	0	0
2000	1033	0.00982	0.021596	-119.424	0.002949	0.011262	cpx	Na0.02Ca0.73Fe''0.40Mg0.73Fe'''0.05Ti0.01Al0.16Si1.90O6	50.2403	0.326609	3.5571	1.9327	0	12.665	0	12.997	17.9491	0.332146	0	0
2000	1032	0.009717	0.021358	-118.115	0.002917	0.01114	cpx	Na0.02Ca0.73Fe''0.40Mg0.73Fe'''0.06Ti0.01Al0.16Si1.90O6	50.2161	0.330497	3.55807	1.94355	0	12.7183	0	12.944	17.9558	0.33371	0	0
2000	1031	0.009617	0.021127	-116.838	0.002886	0.01102	cpx	Na0.02Ca0.73Fe''0.40Mg0.73Fe'''0.06Ti0.01Al0.16Si1.90O6	50.1918	0.334431	3.55908	1.95451	0	12.7719	0	12.8908	17.9623	0.335283	0	0
2000	1030	0.009519	0.020901	-115.592	0.002856	0.010903	cpx	Na0.02Ca0.73Fe''0.41Mg0.72Fe'''0.06Ti0.01Al0.16Si1.90O6	50.1672	0.338411	3.5601	1.96558	0	12.8258	0	12.8373	17.9688	0.336866	0	0
2000	1029	0.009424	0.020681	-114.377	0.002826	0.01079	cpx	Na0.02Ca0.73Fe''0.41Mg0.72Fe'''0.06Ti0.01Al0.16Si1.90O6	50.1424	0.342439	3.56116	1.97676	0	12.8801	0	12.7835	17.9752	0.338457	0	0
2000	1028	0.009331	0.020466	-113.191	0.002798	0.010679	cpx	Na0.02Ca0.73Fe''0.41Mg0.72Fe'''0.06Ti0.01Al0.16Si1.89O6	50.1175	0.346514	3.56225	1.98806	0	12.9347	0	12.7295	17.9815	0.340059	0	0
2000	1027	0.009241	0.020257	-112.035	0.00277	0.01057	cpx	Na0.03Ca0.73Fe''0.41Mg0.71Fe'''0.06Ti0.01Al0.16Si1.89O6	50.0923	0.350637	3.56336	1.99947	0	12.9896	0	12.6752	17.9877	0.341669	0	0
2000	1026	0.009153	0.020053	-110.907	0.002742	0.010465	cpx	Na0.03Ca0.73Fe''0.41Mg0.71Fe'''0.06Ti0.01Al0.16Si1.89O6	50.067	0.354808	3.56449	2.01099	0	13.0449	0	12.6206	17.9939	0.343289	0	0
2000	1025	0.009067	0.019854	-109.808	0.002716	0.010362	cpx	Na0.03Ca0.73Fe''0.41Mg0.71Fe'''0.06Ti0.01Al0.16Si1.89O6	50.0414	0.359027	3.56566	2.02263	0	13.1005	0	12.5658	18	0.344918	0	0
2000	1024	0.008984	0.01966	-108.737	0.00269	0.010262	cpx	Na0.03Ca0.73Fe''0.42Mg0.71Fe'''0.06Ti0.01Al0.16Si1.89O6	50.0157	0.363295	3.56684	2.03439	0	13.1565	0	12.5107	18.006	0.346557	0	0
2000	1023	0.008902	0.01947	-107.688	0.002665	0.010164	cpx	Na0.03Ca0.73Fe''0.42Mg0.70Fe'''0.06Ti0.01Al0.16Si1.89O6	49.9898	0.367611	3.56806	2.04627	0	13.2129	0	12.4554	18.0119	0.348206	0	0
2000	1022	0.008821	0.019283	-106.656	0.00264	0.010067	cpx	Na0.03Ca0.73Fe''0.42Mg0.70Fe'''0.06Ti0.01Al0.16Si1.89O6	49.9636	0.371976	3.56929	2.05827	0	13.2695	0	12.3997	18.0177	0.349864	0	0
2000	1021	0.008743	0.019102	-105.65	0.002615	0.009973	cpx	Na0.03Ca0.73Fe''0.42Mg0.70Fe'''0.06Ti0.01Al0.16Si1.89O6	49.9373	0.37639	3.57055	2.07039	0	13.3266	0	12.3438	18.0234	0.351531	0	0
2000	1020	0.008667	0.018925	-104.67	0.002592	0.009882	cpx	Na0.03Ca0.73Fe''0.42Mg0.69Fe'''0.06Ti0.01Al0.16Si1.89O6	49.9107	0.380854	3.57183	2.08263	0	13.384	0	12.2877	18.0291	0.353208	0	0
2000	1019	0.008593	0.018752	-103.716	0.002569	0.009793	cpx	Na0.03Ca0.73Fe''0.43Mg0.69Fe'''0.06Ti0.01Al0.16Si1.89O6	49.884	0.385366	3.57313	2.09499	0	13.4418	0	12.2312	18.0346	0.354894	0	0
2000	1018	0.008521	0.018585	-102.787	0.002546	0.009706	cpx	Na0.03Ca0.73Fe''0.43Mg0.69Fe'''0.06Ti0.01Al0.16Si1.89O6	49.8571	0.389927	3.57445	2.10748	0	13.4999	0	12.1745	18.0401	0.356591	0	0
2000	1017	0.008451	0.018422	-101.883	0.002525	0.009622	cpx	Na0.03Ca0.73Fe''0.43Mg0.69Fe'''0.06Ti0.01Al0.16Si1.89O6	49.8299	0.394537	3.57579	2.12009	0	13.5584	0	12.1175	18.0455	0.358296	0	0
2000	1016	0.008383	0.018263	-101.003	0.002503	0.00954	cpx	Na0.03Ca0.73Fe''0.43Mg0.68Fe'''0.06Ti0.01Al0.16Si1.89O6	49.8026	0.399196	3.57715	2.13283	0	13.6173	0	12.0602	18.0507	0.360011	0	0
2000	1015	0.008317	0.018109	-100.147	0.002483	0.00946	cpx	Na0.03Ca0.73Fe''0.43Mg0.68Fe'''0.06Ti0.01Al0.16Si1.89O6	49.775	0.403903	3.57853	2.1457	0	13.6765	0	12.0027	18.0559	0.361736	0	0
2000	1014	0.008252	0.017959	-99.3142	0.002463	0.009382	cpx	Na0.03Ca0.74Fe''0.44Mg0.68Fe'''0.06Ti0.01Al0.16Si1.89O6	49.7473	0.408659	3.57992	2.15869	0	13.7362	0	11.9449	18.061	0.36347	0	0
2000	1013	0.00819	0.017813	-98.5044	0.002443	0.009307	cpx	Na0.03Ca0.74Fe''0.44Mg0.67Fe'''0.06Ti0.01Al0.16Si1.89O6	49.7193	0.413462	3.58133	2.17181	0	13.7962	0	11.8868	18.0659	0.365214	0	0
2000	1012	0.008129	0.017671	-97.7171	0.002424	0.009234	cpx	Na0.03Ca0.74Fe''0.44Mg0.67Fe'''0.06Ti0.01Al0.16Si1.89O6	49.6912	0.418312	3.58275	2.18506	0	13.8566	0	11.8284	18.0708	0.366967	0	0
2000	1011	0.008071	0.017533	-96.952	0.002406	0.009163	cpx	Na0.03Ca0.74Fe''0.44Mg0.67Fe'''0.06Ti0.01Al0.16Si1.89O6	49.6628	0.423209	3.58418	2.19844	0	13.9173	0	11.7698	18.0755	0.36873	0	0
2000	1010	0.008014	0.0174	-96.2085	0.002388	0.009093	cpx	Na0.03Ca0.74Fe''0.44Mg0.66Fe'''0.06Ti0.01Al0.16Si1.89O6	49.6342	0.428151	3.58562	2.21195	0	13.9785	0	11.7108	18.0802	0.370501	0	0
2000	1009	0.007958	0.01727	-95.4863	0.002371	0.009026	cpx	Na0.03Ca0.74Fe''0.45Mg0.66Fe'''0.06Ti0.01Al0.16Si1.89O6	49.6055	0.433139	3.58707	2.22559	0	14.0401	0	11.6516	18.0847	0.372283	0	0
2000	1008	0.007905	0.017144	-94.7851	0.002354	0.008961	cpx	Na0.03Ca0.74Fe''0.45Mg0.66Fe'''0.06Ti0.01Al0.16Si1.89O6	49.5765	0.438171	3.58853	2.23936	0	14.102	0	11.5921	18.0891	0.374073	0	0
2000	1007	0.007853	0.017022	-94.1046	0.002338	0.008898	cpx	Na0.03Ca0.74Fe''0.45Mg0.66Fe'''0.06Ti0.01Al0.16Si1.89O6	49.5474	0.443246	3.58999	2.25326	0	14.1644	0	11.5324	18.0934	0.375872	0	0
2000	1006	0.007803	0.016904	-93.4447	0.002322	0.008837	cpx	Na0.03Ca0.74Fe''0.45Mg0.65Fe'''0.07Ti0.01Al0.16Si1.89O6	49.518	0.448362	3.59146	2.2673	0	14.2272	0	11.4724	18.0976	0.37768	0	0
2000	1005	0.007755	0.016789	-92.8051	0.002307	0.008778	cpx	Na0.03Ca0.74Fe''0.46Mg0.65Fe'''0.07Ti0.01Al0.16Si1.89O6	49.4885	0.453519	3.59292	2.28146	0	14.2903	0	11.4121	18.1017	0.379497	0	0
2000	1004	0.007708	0.016678	-92.1858	0.002292	0.00872	cpx	Na0.03Ca0.74Fe''0.46Mg0.65Fe'''0.07Ti0.01Al0.16Si1.89O6	49.4588	0.458715	3.59438	2.29575	0	14.3539	0	11.3515	18.1056	0.381323	0	0
2000	1003	0.007663	0.016571	-91.5871	0.002278	0.008665	cpx	Na0.03Ca0.74Fe''0.46Mg0.64Fe'''0.07Ti0.01Al0.16Si1.89O6	49.4289	0.463947	3.59584	2.31018	0	14.4178	0	11.2907	18.1095	0.383158	0	0
2000	1002	0.007619	0.016468	-91.0093	0.002264	0.008612	cpx	Na0.03Ca0.74Fe''0.46Mg0.64Fe'''0.07Ti0.01Al0.16Si1.89O6	49.3988	0.469215	3.59729	2.32473	0	14.4822	0	11.2296	18.1132	0.385	0	0
2000	1001	0.007578	0.016368	-90.4533	0.002251	0.00856	cpx	Na0.03Ca0.74Fe''0.46Mg0.64Fe'''0.07Ti0.01Al0.16Si1.89O6	49.3685	0.474514	3.59873	2.33941	0	14.547	0	11.1683	18.1167	0.386851	0	0
2000	1000	0.007538	0.016273	-89.9203	0.002238	0.008511	cpx	Na0.03Ca0.74Fe''0.47Mg0.63Fe'''0.07Ti0.01Al0.16Si1.89O6	49.3381	0.479843	3.60015	2.35422	0	14.6122	0	11.1067	18.1201	0.38871	0	0
2000	999	0.007501	0.016183	-89.4125	0.002226	0.008464	cpx	Na0.03Ca0.74Fe''0.47Mg0.63Fe'''0.07Ti0.01Al0.16Si1.89O6	49.3075	0.485197	3.60155	2.36914	0	14.6778	0	11.0448	18.1234	0.390576	0	0
2000	998	0.007466	0.016098	-88.9334	0.002215	0.00842	cpx	Na0.03Ca0.74Fe''0.47Mg0.63Fe'''0.07Ti0.01Al0.16Si1.88O6	49.2767	0.490571	3.60293	2.38419	0	14.7438	0	10.9827	18.1266	0.39245	0	0
2000	997	0.007433	0.016019	-88.4885	0.002205	0.00838	cpx	Na0.03Ca0.74Fe''0.47Mg0.62Fe'''0.07Ti0.01Al0.16Si1.88O6	49.2458	0.495961	3.60427	2.39936	0	14.8102	0	10.9204	18.1296	0.39433	0	0
2000	996	0.007405	0.015948	-88.0876	0.002196	0.008343	cpx	Na0.03Ca0.74Fe''0.48Mg0.62Fe'''0.07Ti0.01Al0.16Si1.88O6	49.2148	0.501358	3.60557	2.41463	0	14.8771	0	10.8579	18.1324	0.396216	0	0
2000	995	0.007381	0.015888	-87.7479	0.002188	0.008312	cpx	Na0.03Ca0.74Fe''0.48Mg0.62Fe'''0.07Ti0.01Al0.16Si1.88O6	49.1837	0.506749	3.60682	2.43	0	14.9443	0	10.7952	18.1351	0.398107	0	0
2000	994	0.007366	0.015845	-87.5023	0.002182	0.008291	cpx	Na0.03Ca0.74Fe''0.48Mg0.61Fe'''0.07Ti0.01Al0.16Si1.88O6	49.1526	0.512117	3.60799	2.44544	0	15.0119	0	10.7324	18.1376	0.400001	0	0
2000	993	0.007364	0.015832	-87.4224	0.002181	0.008285	cpx	Na0.03Ca0.75Fe''0.48Mg0.61Fe'''0.07Ti0.01Al0.16Si1.88O6	49.1215	0.517429	3.60904	2.46092	0	15.0798	0	10.6694	18.14	0.401895	0	0
2000	992	0.007392	0.015883	-87.6912	0.002188	0.008311	cpx	Na0.03Ca0.75Fe''0.49Mg0.61Fe'''0.07Ti0.02Al0.16Si1.88O6	49.0906	0.522615	3.60991	2.47636	0	15.1481	0	10.6066	18.1421	0.403784	0	0
2000	991	0.007502	0.016109	-88.9288	0.00222	0.00843	cpx	Na0.03Ca0.75Fe''0.49Mg0.60Fe'''0.07Ti0.02Al0.16Si1.88O6	49.0604	0.527483	3.61037	2.49154	0	15.2164	0	10.5444	18.1439	0.405649	0	0
2000	990	0.006214	0.013334	-73.6009	0.001838	0.006979	cpx	Na0.03Ca0.75Fe''0.49Mg0.60Fe'''0.07Ti0.02Al0.16Si1.88O6	49.0228	0.535164	3.61395	2.51014	0	15.2884	0	10.475	18.1468	0.407772	0	0
2000	989	0.011373	0.024394	-134.653	0.003363	0.012769	cpx	Na0.03Ca0.75Fe''0.49Mg0.60Fe'''0.07Ti0.02Al0.16Si1.88O6	49.0157	0.530987	3.60417	2.51489	0	15.3469	0	10.4345	18.1441	0.408838	0	0
2000	988	0.011584	0.024831	-137.077	0.003425	0.013	cpx	Na0.03Ca0.75Fe''0.49Mg0.60Fe'''0.07Ti0.02Al0.16Si1.88O6	49.0105	0.526034	3.59352	2.51873	0	15.4047	0	10.3957	18.1409	0.409836	0	0
2000	987	0.01144	0.024511	-135.317	0.003382	0.012835	cpx	Na0.03Ca0.75Fe''0.50Mg0.59Fe'''0.07Ti0.02Al0.16Si1.88O6	49.0052	0.521109	3.5829	2.5226	0	15.4627	0	10.3569	18.1377	0.410836	0	0
2000	986	0.011301	0.024198	-133.6	0.00334	0.012673	cpx	Na0.03Ca0.75Fe''0.50Mg0.59Fe'''0.07Ti0.01Al0.16Si1.88O6	48.9998	0.51621	3.57232	2.52651	0	15.521	0	10.3178	18.1345	0.411839	0	0
2000	985	0.011164	0.023894	-131.926	0.003298	0.012516	cpx	Na0.03Ca0.75Fe''0.50Mg0.59Fe'''0.07Ti0.01Al0.16Si1.88O6	48.9943	0.511339	3.56177	2.53046	0	15.5795	0	10.2786	18.1311	0.412845	0	0
2000	984	0.011032	0.023596	-130.292	0.003258	0.012362	cpx	Na0.03Ca0.75Fe''0.50Mg0.59Fe'''0.07Ti0.01Al0.16Si1.88O6	48.9887	0.506494	3.55126	2.53445	0	15.6383	0	10.2393	18.1277	0.413854	0	0
2000	983	0.010902	0.023306	-128.697	0.003219	0.012213	cpx	Na0.03Ca0.75Fe''0.50Mg0.58Fe'''0.07Ti0.01Al0.16Si1.88O6	48.9829	0.501676	3.54077	2.53848	0	15.6972	0	10.1998	18.1243	0.414866	0	0
2000	982	0.010776	0.023023	-127.142	0.003181	0.012066	cpx	Na0.03Ca0.75Fe''0.51Mg0.58Fe'''0.07Ti0.01Al0.16Si1.88O6	48.9771	0.496884	3.53032	2.54255	0	15.7565	0	10.1601	18.1207	0.41588	0	0
2000	981	0.010652	0.022747	-125.624	0.003144	0.011924	cpx	Na0.03Ca0.75Fe''0.51Mg0.58Fe'''0.07Ti0.01Al0.16Si1.88O6	48.9711	0.492118	3.51991	2.54665	0	15.8159	0	10.1202	18.1171	0.416898	0	0
2000	980	0.010532	0.022478	-124.142	0.003108	0.011785	cpx	Na0.03Ca0.75Fe''0.51Mg0.58Fe'''0.07Ti0.01Al0.16Si1.88O6	48.965	0.487378	3.50952	2.5508	0	15.8757	0	10.0802	18.1135	0.417918	0	0
2000	979	0.010414	0.022215	-122.697	0.003072	0.011649	cpx	Na0.03Ca0.75Fe''0.51Mg0.58Fe'''0.07Ti0.01Al0.16Si1.89O6	48.9588	0.482664	3.49916	2.55498	0	15.9356	0	10.0401	18.1097	0.418942	0	0
2000	978	0.0103	0.021958	-121.286	0.003038	0.011516	cpx	Na0.03Ca0.75Fe''0.52Mg0.57Fe'''0.07Ti0.01Al0.16Si1.89O6	48.9525	0.477975	3.48883	2.5592	0	15.9959	0	9.99976	18.1059	0.419968	0	0
2000	977	0.010188	0.021708	-119.908	0.003004	0.011387	cpx	Na0.03Ca0.75Fe''0.52Mg0.57Fe'''0.07Ti0.01Al0.16Si1.89O6	48.946	0.473311	3.47854	2.56346	0	16.0563	0	9.95928	18.1021	0.420997	0	0
2000	976	0.010079	0.021463	-118.564	0.002971	0.011261	cpx	Na0.03Ca0.75Fe''0.52Mg0.57Fe'''0.07Ti0.01Al0.16Si1.89O6	48.9395	0.468672	3.46827	2.56776	0	16.117	0	9.91863	18.0981	0.422028	0	0
2000	975	0.009973	0.021225	-117.252	0.002939	0.011138	cpx	Na0.03Ca0.75Fe''0.52Mg0.57Fe'''0.07Ti0.01Al0.16Si1.89O6	48.9328	0.464059	3.45803	2.5721	0	16.178	0	9.87783	18.0941	0.423063	0	0
2000	974	0.009869	0.020992	-115.971	0.002907	0.011017	cpx	Na0.03Ca0.75Fe''0.52Mg0.57Fe'''0.07Ti0.01Al0.16Si1.89O6	48.926	0.45947	3.44781	2.57647	0	16.2392	0	9.83686	18.09	0.4241	0	0
2000	973	0.009767	0.020765	-114.72	0.002877	0.0109	cpx	Na0.03Ca0.75Fe''0.53Mg0.56Fe'''0.07Ti0.01Al0.16Si1.89O6	48.9191	0.454906	3.43763	2.58088	0	16.3007	0	9.79573	18.0858	0.42514	0	0
2000	972	0.009668	0.020543	-113.499	0.002847	0.010785	cpx	Na0.03Ca0.75Fe''0.53Mg0.56Fe'''0.08Ti0.01Al0.16Si1.89O6	48.9121	0.450366	3.42747	2.58534	0	16.3625	0	9.75444	18.0816	0.426183	0	0
2000	971	0.009572	0.020327	-112.307	0.002818	0.010674	cpx	Na0.03Ca0.75Fe''0.53Mg0.56Fe'''0.08Ti0.01Al0.16Si1.89O6	48.905	0.44585	3.41733	2.58983	0	16.4245	0	9.71299	18.0773	0.427228	0	0
2000	970	0.009478	0.020115	-111.143	0.002789	0.010564	cpx	Na0.03Ca0.75Fe''0.53Mg0.56Fe'''0.08Ti0.01Al0.16Si1.89O6	48.8978	0.441359	3.40722	2.59436	0	16.4867	0	9.67138	18.0729	0.428276	0	0
2000	969	0.009386	0.019909	-110.007	0.002762	0.010458	cpx	Na0.03Ca0.75Fe''0.53Mg0.55Fe'''0.08Ti0.01Al0.15Si1.89O6	48.8904	0.436892	3.39714	2.59893	0	16.5493	0	9.62961	18.0684	0.429327	0	0
2000	968	0.009296	0.019708	-108.898	0.002734	0.010354	cpx	Na0.03Ca0.75Fe''0.54Mg0.55Fe'''0.08Ti0.01Al0.15Si1.89O6	48.883	0.432449	3.38708	2.60353	0	16.612	0	9.58768	18.0639	0.43038	0	0
2000	967	0.009209	0.019511	-107.814	0.002708	0.010252	cpx	Na0.03Ca0.75Fe''0.54Mg0.55Fe'''0.08Ti0.01Al0.15Si1.89O6	48.8754	0.428029	3.37705	2.60818	0	16.6751	0	9.54559	18.0592	0.431436	0	0
2000	966	0.009123	0.019319	-106.757	0.002682	0.010153	cpx	Na0.03Ca0.75Fe''0.54Mg0.55Fe'''0.08Ti0.01Al0.15Si1.89O6	48.8677	0.423633	3.36703	2.61286	0	16.7384	0	9.50334	18.0545	0.432495	0	0
2000	965	0.00904	0.019132	-105.724	0.002657	0.010057	cpx	Na0.03Ca0.75Fe''0.54Mg0.55Fe'''0.08Ti0.01Al0.15Si1.89O6	48.86	0.419261	3.35704	2.61758	0	16.8019	0	9.46093	18.0497	0.433556	0	0
2000	964	0.008959	0.018949	-104.715	0.002632	0.009962	cpx	Na0.03Ca0.75Fe''0.55Mg0.54Fe'''0.08Ti0.01Al0.15Si1.89O6	48.8521	0.414912	3.34708	2.62233	0	16.8658	0	9.41837	18.0449	0.434619	0	0
2000	963	0.008879	0.01877	-103.73	0.002608	0.00987	cpx	Na0.03Ca0.75Fe''0.55Mg0.54Fe'''0.08Ti0.01Al0.15Si1.89O6	48.844	0.410586	3.33713	2.62713	0	16.9299	0	9.37564	18.0399	0.435685	0	0
2000	962	0.008802	0.018596	-102.768	0.002585	0.00978	cpx	Na0.03Ca0.75Fe''0.55Mg0.54Fe'''0.08Ti0.01Al0.15Si1.89O6	48.8359	0.406284	3.32721	2.63196	0	16.9942	0	9.33276	18.0349	0.436754	0	0
2000	961	0.008726	0.018426	-101.829	0.002562	0.009692	cpx	Na0.03Ca0.75Fe''0.55Mg0.54Fe'''0.08Ti0.01Al0.15Si1.89O6	48.8277	0.402005	3.3173	2.63683	0	17.0588	0	9.28973	18.0298	0.437825	0	0
2000	960	0.008653	0.01826	-100.912	0.00254	0.009606	cpx	Na0.03Ca0.75Fe''0.55Mg0.53Fe'''0.08Ti0.01Al0.15Si1.89O6	48.8194	0.397748	3.30742	2.64174	0	17.1237	0	9.24654	18.0246	0.438898	0	0
2000	959	0.008581	0.018097	-100.017	0.002518	0.009522	cpx	Na0.03Ca0.75Fe''0.56Mg0.53Fe'''0.08Ti0.01Al0.15Si1.89O6	48.8109	0.393515	3.29756	2.64668	0	17.1889	0	9.20319	18.0193	0.439974	0	0
2000	958	0.00851	0.017939	-99.1423	0.002496	0.009441	cpx	Na0.03Ca0.75Fe''0.56Mg0.53Fe'''0.08Ti0.01Al0.15Si1.89O6	48.8024	0.389305	3.28771	2.65166	0	17.2543	0	9.15969	18.0139	0.441052	0	0
2000	957	0.008442	0.017784	-98.2885	0.002476	0.009361	cpx	Na0.03Ca0.75Fe''0.56Mg0.53Fe'''0.08Ti0.01Al0.15Si1.89O6	48.7937	0.385117	3.27789	2.65667	0	17.32	0	9.11604	18.0084	0.442133	0	0
2000	956	0.008375	0.017633	-97.4548	0.002455	0.009283	cpx	Na0.03Ca0.75Fe''0.56Mg0.52Fe'''0.08Ti0.01Al0.15Si1.89O6	48.785	0.380952	3.26808	2.66172	0	17.3859	0	9.07223	18.0029	0.443215	0	0
2000	955	0.00831	0.017486	-96.6407	0.002436	0.009207	cpx	Na0.03Ca0.75Fe''0.57Mg0.52Fe'''0.08Ti0.01Al0.15Si1.89O6	48.7761	0.37681	3.25829	2.66681	0	17.4522	0	9.02828	17.9973	0.4443	0	0
2000	954	0.008246	0.017342	-95.8458	0.002416	0.009133	cpx	Na0.03Ca0.75Fe''0.57Mg0.52Fe'''0.08Ti0.01Al0.15Si1.89O6	48.7671	0.37269	3.24851	2.67193	0	17.5186	0	8.98417	17.9915	0.445388	0	0
2000	953	0.008184	0.017202	-95.0697	0.002397	0.00906	cpx	Na0.03Ca0.75Fe''0.57Mg0.52Fe'''0.08Ti0.01Al0.15Si1.89O6	48.7581	0.368593	3.23876	2.67709	0	17.5854	0	8.93992	17.9857	0.446477	0	0
2000	952	0.008124	0.017065	-94.3119	0.002379	0.00899	cpx	Na0.03Ca0.75Fe''0.57Mg0.51Fe'''0.08Ti0.01Al0.15Si1.89O6	48.7489	0.364518	3.22902	2.68228	0	17.6524	0	8.89551	17.9798	0.447568	0	0
2000	951	0.008065	0.016931	-93.5721	0.002361	0.008921	cpx	Na0.03Ca0.75Fe''0.58Mg0.51Fe'''0.08Ti0.01Al0.15Si1.89O6	48.7396	0.360466	3.21929	2.6875	0	17.7197	0	8.85096	17.9739	0.448662	0	0
2000	950	0.008007	0.0168	-92.8499	0.002344	0.008853	cpx	Na0.03Ca0.75Fe''0.58Mg0.51Fe'''0.08Ti0.01Al0.15Si1.89O6	48.7302	0.356436	3.20958	2.69276	0	17.7872	0	8.80627	17.9678	0.449757	0	0
2000	949	0.007951	0.016673	-92.1448	0.002326	0.008788	cpx	Na0.03Ca0.75Fe''0.58Mg0.51Fe'''0.08Ti0.01Al0.15Si1.89O6	48.7207	0.352429	3.19988	2.69805	0	17.855	0	8.76143	17.9616	0.450855	0	0
2000	948	0.007897	0.016549	-91.4565	0.00231	0.008724	cpx	Na0.03Ca0.75Fe''0.58Mg0.51Fe'''0.08Ti0.01Al0.15Si1.89O6	48.7112	0.348443	3.1902	2.70338	0	17.923	0	8.71645	17.9554	0.451955	0	0
2000	947	0.007843	0.016427	-90.7847	0.002294	0.008661	cpx	Na0.03Ca0.75Fe''0.59Mg0.50Fe'''0.08Ti0.01Al0.15Si1.89O6	48.7015	0.34448	3.18053	2.70873	0	17.9914	0	8.67132	17.949	0.453056	0	0
2000	946	0.007791	0.016309	-90.1289	0.002278	0.0086	cpx	Na0.03Ca0.75Fe''0.59Mg0.50Fe'''0.08Ti0.01Al0.15Si1.89O6	48.6917	0.34054	3.17088	2.71412	0	18.0599	0	8.62606	17.9426	0.454159	0	0
2000	945	0.007741	0.016193	-89.4889	0.002262	0.00854	cpx	Na0.03Ca0.75Fe''0.59Mg0.50Fe'''0.08Ti0.01Al0.15Si1.89O6	48.6818	0.336621	3.16123	2.71954	0	18.1288	0	8.58066	17.9361	0.455265	0	0
2000	944	0.007691	0.016081	-88.8643	0.002247	0.008482	cpx	Na0.03Ca0.75Fe''0.59Mg0.50Fe'''0.08Ti0.01Al0.14Si1.90O6	48.6719	0.332725	3.1516	2.72499	0	18.1979	0	8.53512	17.9295	0.456372	0	0
2000	943	0.007643	0.015971	-88.2547	0.002232	0.008426	cpx	Na0.03Ca0.75Fe''0.60Mg0.49Fe'''0.08Ti0.01Al0.14Si1.90O6	48.6618	0.328851	3.14198	2.73047	0	18.2672	0	8.48945	17.9228	0.45748	0	0
2000	942	0.007597	0.015863	-87.6599	0.002218	0.008371	cpx	Na0.03Ca0.75Fe''0.60Mg0.49Fe'''0.08Ti0.01Al0.14Si1.90O6	48.6516	0.324998	3.13237	2.73598	0	18.3368	0	8.44364	17.916	0.458591	0	0
2000	941	0.007551	0.015759	-87.0796	0.002204	0.008317	cpx	Na0.03Ca0.75Fe''0.60Mg0.49Fe'''0.08Ti0.01Al0.14Si1.90O6	48.6414	0.321169	3.12278	2.74152	0	18.4067	0	8.39771	17.9091	0.459703	0	0
2000	940	0.007507	0.015657	-86.5134	0.00219	0.008264	cpx	Na0.03Ca0.75Fe''0.60Mg0.49Fe'''0.08Ti0.01Al0.14Si1.90O6	48.631	0.317361	3.11319	2.74709	0	18.4768	0	8.35164	17.9021	0.460816	0	0
2000	939	0.007463	0.015557	-85.9611	0.002177	0.008213	cpx	Na0.03Ca0.75Fe''0.61Mg0.48Fe'''0.08Ti0.01Al0.14Si1.90O6	48.6206	0.313575	3.10361	2.75269	0	18.5471	0	8.30545	17.895	0.461931	0	0
2000	938	0.007421	0.01546	-85.4223	0.002164	0.008163	cpx	Na0.04Ca0.75Fe''0.61Mg0.48Fe'''0.08Ti0.01Al0.14Si1.90O6	48.6101	0.309812	3.09404	2.75831	0	18.6177	0	8.25913	17.8878	0.463048	0	0
2000	937	0.00738	0.015365	-84.8968	0.002152	0.008115	cpx	Na0.04Ca0.75Fe''0.61Mg0.48Fe'''0.08Ti0.01Al0.14Si1.90O6	48.5995	0.30607	3.08448	2.76396	0	18.6886	0	8.21269	17.8806	0.464166	0	0
2000	936	0.00734	0.015273	-84.3844	0.002139	0.008067	cpx	Na0.04Ca0.75Fe''0.61Mg0.48Fe'''0.08Ti0.01Al0.14Si1.90O6	48.5888	0.302351	3.07493	2.76963	0	18.7597	0	8.16613	17.8732	0.465285	0	0
2000	935	0.007302	0.015183	-83.8847	0.002127	0.008021	cpx	Na0.04Ca0.75Fe''0.62Mg0.47Fe'''0.08Ti0.01Al0.14Si1.90O6	48.578	0.298654	3.06538	2.77533	0	18.831	0	8.11945	17.8658	0.466406	0	0
2000	934	0.007264	0.015096	-83.3975	0.002116	0.007976	cpx	Na0.04Ca0.75Fe''0.62Mg0.47Fe'''0.08Ti0.01Al0.14Si1.90O6	48.5671	0.294979	3.05584	2.78105	0	18.9026	0	8.07265	17.8583	0.467528	0	0
2000	933	0.007227	0.01501	-82.9226	0.002104	0.007932	cpx	Na0.04Ca0.75Fe''0.62Mg0.47Fe'''0.08Ti0.01Al0.14Si1.90O6	48.5562	0.291326	3.04631	2.7868	0	18.9744	0	8.02574	17.8506	0.468651	0	0
2000	932	0.007191	0.014927	-82.4596	0.002093	0.00789	cpx	Na0.04Ca0.75Fe''0.62Mg0.47Fe'''0.08Ti0.01Al0.14Si1.90O6	48.5451	0.287696	3.03679	2.79257	0	19.0464	0	7.97872	17.8429	0.469775	0	0
2000	931	0.007157	0.014846	-82.0085	0.002083	0.007848	cpx	Na0.04Ca0.75Fe''0.63Mg0.46Fe'''0.08Ti0.01Al0.14Si1.90O6	48.534	0.284088	3.02727	2.79836	0	19.1186	0	7.93159	17.8351	0.4709	0	0
2000	930	0.007123	0.014767	-81.5688	0.002072	0.007808	cpx	Na0.04Ca0.75Fe''0.63Mg0.46Fe'''0.08Ti0.01Al0.14Si1.90O6	48.5228	0.280502	3.01776	2.80417	0	19.1911	0	7.88436	17.8272	0.472026	0	0
2000	929	0.00709	0.01469	-81.1405	0.002062	0.007768	cpx	Na0.04Ca0.75Fe''0.63Mg0.46Fe'''0.08Ti0.01Al0.14Si1.90O6	48.5116	0.276938	3.00825	2.81	0	19.2638	0	7.83702	17.8192	0.473153	0	0
2000	928	0.007058	0.014615	-80.7232	0.002052	0.00773	cpx	Na0.04Ca0.75Fe''0.63Mg0.45Fe'''0.08Ti0.01Al0.14Si1.90O6	48.5002	0.273397	2.99875	2.81584	0	19.3368	0	7.78958	17.8112	0.474281	0	0
2000	927	0.007028	0.014542	-80.3167	0.002042	0.007693	cpx	Na0.04Ca0.75Fe''0.64Mg0.45Fe'''0.08Ti0.01Al0.14Si1.90O6	48.4888	0.269878	2.98925	2.82171	0	19.4099	0	7.74205	17.803	0.47541	0	0
2000	926	0.006998	0.014472	-79.9209	0.002033	0.007656	cpx	Na0.04Ca0.75Fe''0.64Mg0.45Fe'''0.08Ti0.01Al0.14Si1.90O6	48.4773	0.266381	2.97975	2.82759	0	19.4833	0	7.69442	17.7947	0.47654	0	0
2000	925	0.006968	0.014403	-79.5356	0.002024	0.007621	cpx	Na0.04Ca0.75Fe''0.64Mg0.45Fe'''0.08Ti0.01Al0.14Si1.90O6	48.4657	0.262907	2.97026	2.83349	0	19.5568	0	7.6467	17.7864	0.47767	0	0
2000	924	0.00694	0.014335	-79.1604	0.002015	0.007587	cpx	Na0.04Ca0.75Fe''0.64Mg0.44Fe'''0.08Ti0.01Al0.14Si1.90O6	48.4541	0.259456	2.96078	2.8394	0	19.6306	0	7.5989	17.778	0.4788	0	0
2000	923	0.006913	0.01427	-78.7952	0.002007	0.007554	cpx	Na0.04Ca0.75Fe''0.65Mg0.44Fe'''0.08Ti0.01Al0.14Si1.90O6	48.4424	0.256027	2.95129	2.84533	0	19.7046	0	7.551	17.7694	0.479932	0	0
2000	922	0.006886	0.014206	-78.4399	0.001998	0.007521	cpx	Na0.04Ca0.75Fe''0.65Mg0.44Fe'''0.08Ti0.01Al0.14Si1.90O6	48.4306	0.25262	2.94181	2.85127	0	19.7788	0	7.50303	17.7608	0.481064	0	0
2000	921	0.006861	0.014145	-78.0942	0.00199	0.00749	cpx	Na0.04Ca0.75Fe''0.65Mg0.44Fe'''0.08Ti0.01Al0.14Si1.90O6	48.4188	0.249237	2.93233	2.85721	0	19.8531	0	7.45498	17.7521	0.482196	0	0
2000	920	0.006836	0.014085	-77.7579	0.001982	0.007459	cpx	Na0.04Ca0.75Fe''0.65Mg0.43Fe'''0.08Ti0.01Al0.14Si1.90O6	48.4069	0.245876	2.92285	2.86317	0	19.9277	0	7.40685	17.7433	0.483328	0	0
2000	919	0.006812	0.014026	-77.4309	0.001975	0.007429	cpx	Na0.04Ca0.75Fe''0.66Mg0.43Fe'''0.08Ti0.01Al0.13Si1.90O6	48.395	0.242538	2.91337	2.86914	0	20.0024	0	7.35865	17.7345	0.484461	0	0
2000	918	0.006788	0.013969	-77.1129	0.001967	0.007401	cpx	Na0.04Ca0.75Fe''0.66Mg0.43Fe'''0.09Ti0.01Al0.13Si1.90O6	48.383	0.239223	2.90389	2.87512	0	20.0773	0	7.31039	17.7255	0.485594	0	0
2000	917	0.006766	0.013914	-76.8038	0.00196	0.007373	cpx	Na0.04Ca0.75Fe''0.66Mg0.43Fe'''0.09Ti0.01Al0.13Si1.90O6	48.3709	0.23593	2.89441	2.8811	0	20.1524	0	7.26206	17.7165	0.486727	0	0
2000	916	0.006744	0.013861	-76.5034	0.001953	0.007345	cpx	Na0.04Ca0.75Fe''0.67Mg0.42Fe'''0.09Ti0.01Al0.13Si1.90O6	48.3588	0.232661	2.88493	2.88708	0	20.2277	0	7.21367	17.7073	0.48786	0	0
2000	915	0.006723	0.013809	-76.2116	0.001946	0.007319	cpx	Na0.04Ca0.75Fe''0.67Mg0.42Fe'''0.09Ti0.01Al0.13Si1.90O6	48.3466	0.229415	2.87546	2.89307	0	20.3031	0	7.16523	17.6981	0.488993	0	0
2000	914	0.006702	0.013758	-75.9281	0.00194	0.007294	cpx	Na0.04Ca0.75Fe''0.67Mg0.42Fe'''0.09Ti0.01Al0.13Si1.90O6	48.3344	0.226192	2.86598	2.89906	0	20.3787	0	7.11673	17.6888	0.490126	0	0
2000	913	0.006683	0.013709	-75.6527	0.001933	0.007269	cpx	Na0.04Ca0.75Fe''0.67Mg0.41Fe'''0.09Ti0.01Al0.13Si1.90O6	48.3221	0.222992	2.8565	2.90506	0	20.4544	0	7.06818	17.6795	0.491258	0	0
2000	912	0.006664	0.013662	-75.3854	0.001927	0.007245	cpx	Na0.04Ca0.75Fe''0.68Mg0.41Fe'''0.09Ti0.01Al0.13Si1.90O6	48.3098	0.219815	2.84702	2.91105	0	20.5303	0	7.01959	17.67	0.492391	0	0
2000	911	0.006645	0.013616	-75.126	0.001921	0.007222	cpx	Na0.04Ca0.75Fe''0.68Mg0.41Fe'''0.09Ti0.01Al0.13Si1.90O6	48.2974	0.216662	2.83754	2.91704	0	20.6064	0	6.97096	17.6605	0.493523	0	0
2000	910	0.006628	0.013571	-74.8742	0.001916	0.007199	cpx	Na0.04Ca0.75Fe''0.68Mg0.41Fe'''0.09Ti0.01Al0.13Si1.90O6	48.285	0.213532	2.82806	2.92303	0	20.6825	0	6.92229	17.6509	0.494655	0	0
2000	909	0.006611	0.013528	-74.63	0.00191	0.007177	cpx	Na0.04Ca0.75Fe''0.68Mg0.40Fe'''0.09Ti0.01Al0.13Si1.90O6	48.2726	0.210426	2.81858	2.92901	0	20.7588	0	6.87359	17.6412	0.495786	0	0
2000	908	0.006594	0.013486	-74.3931	0.001905	0.007156	cpx	Na0.04Ca0.75Fe''0.69Mg0.40Fe'''0.09Ti0.01Al0.13Si1.90O6	48.2601	0.207344	2.80909	2.93499	0	20.8353	0	6.82486	17.6314	0.496916	0	0
2000	907	0.006579	0.013445	-74.1635	0.0019	0.007136	cpx	Na0.04Ca0.75Fe''0.69Mg0.40Fe'''0.09Ti0.01Al0.13Si1.90O6	48.2476	0.204285	2.7996	2.94095	0	20.9118	0	6.77611	17.6216	0.498046	0	0
2000	906	0.006564	0.013406	-73.9409	0.001895	0.007116	cpx	Na0.04Ca0.75Fe''0.69Mg0.40Fe'''0.09Ti0.01Al0.13Si1.90O6	48.235	0.20125	2.79011	2.94691	0	20.9885	0	6.72733	17.6117	0.499176	0	0
2000	905	0.006549	0.013367	-73.7253	0.00189	0.007097	cpx	Na0.04Ca0.74Fe''0.70Mg0.39Fe'''0.09Ti0.01Al0.13Si1.90O6	48.2225	0.198239	2.78062	2.95286	0	21.0653	0	6.67854	17.6017	0.500304	0	0
2000	904	0.006535	0.01333	-73.5164	0.001885	0.007079	cpx	Na0.04Ca0.74Fe''0.70Mg0.39Fe'''0.09Ti0.01Al0.13Si1.90O6	48.2099	0.195251	2.77112	2.9588	0	21.1421	0	6.62974	17.5917	0.501432	0	0
2000	903	0.006522	0.013295	-73.3141	0.001881	0.007061	cpx	Na0.04Ca0.74Fe''0.70Mg0.39Fe'''0.09Ti0.01Al0.13Si1.91O6	48.1972	0.192288	2.76162	2.96472	0	21.2191	0	6.58094	17.5816	0.502559	0	0
2000	902	0.006509	0.01326	-73.1183	0.001876	0.007044	cpx	Na0.04Ca0.74Fe''0.70Mg0.39Fe'''0.09Ti0.01Al0.13Si1.91O6	48.1846	0.189349	2.75212	2.97063	0	21.2962	0	6.53213	17.5714	0.503685	0	0
2000	901	0.006497	0.013227	-72.9288	0.001872	0.007027	cpx	Na0.04Ca0.74Fe''0.71Mg0.38Fe'''0.09Ti0.01Al0.13Si1.91O6	48.1719	0.186434	2.74261	2.97651	0	21.3733	0	6.48332	17.5611	0.50481	0	0
2000	900	0.006485	0.013195	-72.7456	0.001868	0.007012	cpx	Na0.04Ca0.74Fe''0.71Mg0.38Fe'''0.09Ti0.01Al0.13Si1.91O6	48.1592	0.183544	2.7331	2.98239	0	21.4505	0	6.43453	17.5508	0.505934	0	0
spinel_0	thermodynamic	data	and	composition:
Pressure	Temperature	mass	S	H	V	Cp	formula	SiO2	TiO2	Al2O3	Fe2O3	Cr2O3	FeO	MnO	MgO	CaO	Na2O	K2O	H2O
2000	1064	0.00029	0.000591	-1.77685	6.1e-05	0.000269	Fe''0.85Mg0.22Fe'''0.75Al0.40Cr0.71Ti0.07O4	0	2.62902	9.65173	28.5517	25.8751	29.0585	0	4.23397	0	0	0	0
2000	1063	0.000804	0.00164	-4.91583	0.00017	0.000745	Fe''0.85Mg0.22Fe'''0.76Al0.39Cr0.71Ti0.07O4	0	2.68603	9.57051	28.7594	25.6331	29.1606	0	4.19036	0	0	0	0
2000	1062	0.001322	0.002697	-8.06456	0.00028	0.001225	Fe''0.86Mg0.22Fe'''0.76Al0.39Cr0.70Ti0.07O4	0	2.74466	9.48868	28.9695	25.3866	29.2636	0	4.14704	0	0	0	0
2000	1061	0.00152	0.0031	-9.24772	0.000322	0.001407	Fe''0.86Mg0.21Fe'''0.77Al0.39Cr0.70Ti0.07O4	0	2.80496	9.40618	29.1819	25.1355	29.3675	0	4.10401	0	0	0	0
2000	1060	0.00152	0.003099	-9.22299	0.000322	0.001406	Fe''0.86Mg0.21Fe'''0.77Al0.38Cr0.69Ti0.08O4	0	2.86701	9.32301	29.3966	24.8797	29.4724	0	4.06126	0	0	0	0
2000	1059	0.00152	0.003099	-9.19953	0.000322	0.001406	Fe''0.87Mg0.21Fe'''0.78Al0.38Cr0.68Ti0.08O4	0	2.93088	9.23912	29.6137	24.6192	29.5784	0	4.01877	0	0	0	0
2000	1058	0.001521	0.003099	-9.17736	0.000322	0.001405	Fe''0.87Mg0.21Fe'''0.79Al0.38Cr0.68Ti0.08O4	0	2.99662	9.15449	29.8331	24.3538	29.6855	0	3.97656	0	0	0	0
2000	1057	0.001521	0.003099	-9.15653	0.000322	0.001405	Fe''0.87Mg0.21Fe'''0.79Al0.38Cr0.67Ti0.08O4	0	3.06431	9.0691	30.0547	24.0835	29.7938	0	3.93461	0	0	0	0
2000	1056	0.001522	0.003101	-9.13707	0.000322	0.001405	Fe''0.88Mg0.20Fe'''0.80Al0.37Cr0.66Ti0.08O4	0	3.13402	8.98291	30.2786	23.8082	29.9033	0	3.89293	0	0	0	0
2000	1055	0.001523	0.003102	-9.11902	0.000322	0.001405	Fe''0.88Mg0.20Fe'''0.81Al0.37Cr0.65Ti0.08O4	0	3.20583	8.89592	30.5047	23.5279	30.0142	0	3.85149	0	0	0	0
2000	1054	0.001525	0.003105	-9.10243	0.000322	0.001406	Fe''0.89Mg0.20Fe'''0.81Al0.37Cr0.65Ti0.09O4	0	3.2798	8.80808	30.7329	23.2424	30.1265	0	3.81032	0	0	0	0
2000	1053	0.001527	0.003107	-9.08735	0.000322	0.001406	Fe''0.89Mg0.20Fe'''0.82Al0.36Cr0.64Ti0.09O4	0	3.35602	8.7194	30.9631	22.9518	30.2403	0	3.76939	0	0	0	0
2000	1052	0.001529	0.003111	-9.07382	0.000323	0.001407	Fe''0.90Mg0.20Fe'''0.83Al0.36Cr0.63Ti0.09O4	0	3.43457	8.62985	31.1953	22.656	30.3556	0	3.72871	0	0	0	0
2000	1051	0.001531	0.003115	-9.0619	0.000323	0.001409	Fe''0.90Mg0.19Fe'''0.83Al0.36Cr0.62Ti0.09O4	0	3.51552	8.53941	31.4294	22.3549	30.4725	0	3.68828	0	0	0	0
2000	1050	0.001534	0.00312	-9.05165	0.000323	0.00141	Fe''0.90Mg0.19Fe'''0.84Al0.35Cr0.62Ti0.10O4	0	3.59896	8.44809	31.6652	22.0485	30.5911	0	3.64809	0	0	0	0
2000	1049	0.001537	0.003125	-9.04313	0.000324	0.001412	Fe''0.91Mg0.19Fe'''0.85Al0.35Cr0.61Ti0.10O4	0	3.68498	8.35586	31.9026	21.7369	30.7115	0	3.60815	0	0	0	0
2000	1048	0.00154	0.003131	-9.03642	0.000324	0.001414	Fe''0.91Mg0.19Fe'''0.86Al0.34Cr0.60Ti0.10O4	0	3.77365	8.26273	32.1415	21.4199	30.8338	0	3.56846	0	0	0	0
2000	1047	0.001543	0.003138	-9.03157	0.000325	0.001417	Fe''0.92Mg0.19Fe'''0.86Al0.34Cr0.59Ti0.10O4	0	3.86507	8.16869	32.3818	21.0975	30.9579	0	3.52901	0	0	0	0
2000	1046	0.001548	0.003145	-9.02868	0.000326	0.00142	Fe''0.92Mg0.18Fe'''0.87Al0.34Cr0.58Ti0.11O4	0	3.95931	8.07375	32.6231	20.7699	31.0841	0	3.48982	0	0	0	0
2000	1045	0.001552	0.003153	-9.02781	0.000327	0.001423	Fe''0.93Mg0.18Fe'''0.88Al0.33Cr0.57Ti0.11O4	0	4.05647	7.97793	32.8654	20.437	31.2124	0	3.45087	0	0	0	0
2000	1044	0.001557	0.003162	-9.02905	0.000328	0.001427	Fe''0.93Mg0.18Fe'''0.88Al0.33Cr0.56Ti0.11O4	0	4.15662	7.88122	33.1084	20.0988	31.3428	0	3.41218	0	0	0	0
2000	1043	0.001562	0.003172	-9.0325	0.000328	0.001431	Fe''0.94Mg0.18Fe'''0.89Al0.33Cr0.55Ti0.11O4	0	4.25985	7.78366	33.3519	19.7554	31.4754	0	3.37374	0	0	0	0
2000	1042	0.001568	0.003183	-9.03824	0.00033	0.001435	Fe''0.94Mg0.18Fe'''0.90Al0.32Cr0.55Ti0.12O4	0	4.36625	7.68525	33.5956	19.4069	31.6104	0	3.33557	0	0	0	0
2000	1041	0.001574	0.003195	-9.04637	0.000331	0.00144	Fe''0.94Mg0.17Fe'''0.91Al0.32Cr0.54Ti0.12O4	0	4.47588	7.58604	33.8393	19.0534	31.7477	0	3.29766	0	0	0	0
2000	1040	0.00158	0.003207	-9.057	0.000332	0.001445	Fe''0.95Mg0.17Fe'''0.91Al0.31Cr0.53Ti0.12O4	0	4.58883	7.48606	34.0827	18.6949	31.8875	0	3.26003	0	0	0	0
2000	1039	0.001587	0.003221	-9.07023	0.000333	0.001451	Fe''0.95Mg0.17Fe'''0.92Al0.31Cr0.52Ti0.13O4	0	4.70516	7.38534	34.3254	18.3316	32.0298	0	3.22267	0	0	0	0
2000	1038	0.001595	0.003236	-9.08618	0.000335	0.001457	Fe''0.96Mg0.17Fe'''0.93Al0.31Cr0.51Ti0.13O4	0	4.82495	7.28393	34.5672	17.9636	32.1747	0	3.1856	0	0	0	0
2000	1037	0.001603	0.003251	-9.10496	0.000336	0.001464	Fe''0.97Mg0.17Fe'''0.94Al0.30Cr0.50Ti0.13O4	0	4.94826	7.18188	34.8076	17.5912	32.3223	0	3.14883	0	0	0	0
2000	1036	0.001612	0.003268	-9.1267	0.000338	0.001471	Fe''0.97Mg0.17Fe'''0.94Al0.30Cr0.49Ti0.14O4	0	5.07513	7.07925	35.0464	17.2144	32.4725	0	3.11235	0	0	0	0
2000	1035	0.001621	0.003286	-9.15151	0.00034	0.001479	Fe''0.98Mg0.16Fe'''0.95Al0.29Cr0.48Ti0.14O4	0	5.20564	6.9761	35.2832	16.8335	32.6254	0	3.07619	0	0	0	0
2000	1034	0.001631	0.003305	-9.17952	0.000342	0.001487	Fe''0.98Mg0.16Fe'''0.96Al0.29Cr0.47Ti0.14O4	0	5.3398	6.8725	35.5175	16.4487	32.7811	0	3.04034	0	0	0	0
2000	1033	0.001641	0.003326	-9.21087	0.000344	0.001496	Fe''0.99Mg0.16Fe'''0.96Al0.29Cr0.45Ti0.15O4	0	5.47767	6.76851	35.7491	16.0602	32.9397	0	3.00482	0	0	0	0
2000	1032	0.001652	0.003347	-9.24569	0.000346	0.001506	Fe''0.99Mg0.16Fe'''0.97Al0.28Cr0.44Ti0.15O4	0	5.61926	6.66422	35.9775	15.6683	33.1011	0	2.96964	0	0	0	0
2000	1031	0.001664	0.00337	-9.28412	0.000348	0.001516	Fe''1.00Mg0.16Fe'''0.98Al0.28Cr0.43Ti0.16O4	0	5.76458	6.5597	36.2023	15.2733	33.2653	0	2.9348	0	0	0	0
2000	1030	0.001676	0.003395	-9.3263	0.000351	0.001526	Fe''1.00Mg0.16Fe'''0.98Al0.27Cr0.42Ti0.16O4	0	5.91365	6.45504	36.4232	14.8754	33.4324	0	2.90032	0	0	0	0
2000	1029	0.001689	0.003421	-9.37236	0.000354	0.001538	Fe''1.01Mg0.15Fe'''0.99Al0.27Cr0.41Ti0.16O4	0	6.06645	6.35033	36.6397	14.475	33.6023	0	2.8662	0	0	0	0
2000	1028	0.001703	0.003448	-9.42247	0.000356	0.00155	Fe''1.02Mg0.15Fe'''1.00Al0.26Cr0.40Ti0.17O4	0	6.22296	6.24565	36.8514	14.0723	33.7752	0	2.83245	0	0	0	0
2000	1027	0.001718	0.003477	-9.47676	0.000359	0.001563	Fe''1.02Mg0.15Fe'''1.00Al0.26Cr0.39Ti0.17O4	0	6.38316	6.14109	37.0581	13.6678	33.9508	0	2.79908	0	0	0	0
2000	1026	0.001733	0.003507	-9.53538	0.000362	0.001576	Fe''1.03Mg0.15Fe'''1.01Al0.26Cr0.38Ti0.18O4	0	6.54701	6.03675	37.2592	13.2617	34.1293	0	2.76609	0	0	0	0
2000	1025	0.00175	0.003539	-9.59848	0.000366	0.001591	Fe''1.04Mg0.15Fe'''1.02Al0.25Cr0.37Ti0.18O4	0	6.71444	5.93273	37.4545	12.8543	34.3105	0	2.7335	0	0	0	0
2000	1024	0.001767	0.003573	-9.6662	0.000369	0.001606	Fe''1.04Mg0.15Fe'''1.02Al0.25Cr0.36Ti0.19O4	0	6.88539	5.82911	37.6437	12.4461	34.4944	0	2.70131	0	0	0	0
2000	1023	0.001785	0.003608	-9.73871	0.000373	0.001622	Fe''1.05Mg0.14Fe'''1.03Al0.24Cr0.34Ti0.19O4	0	7.05977	5.72599	37.8264	12.0373	34.681	0	2.66952	0	0	0	0
2000	1022	0.001804	0.003645	-9.81616	0.000377	0.001639	Fe''1.05Mg0.14Fe'''1.03Al0.24Cr0.33Ti0.20O4	0	7.2375	5.62346	38.0023	11.6284	34.8702	0	2.63815	0	0	0	0
2000	1021	0.001823	0.003684	-9.8987	0.000381	0.001656	Fe''1.06Mg0.14Fe'''1.04Al0.24Cr0.32Ti0.20O4	0	7.41847	5.52161	38.1713	11.2196	35.0619	0	2.60718	0	0	0	0
2000	1020	0.001844	0.003725	-9.98646	0.000385	0.001675	Fe''1.07Mg0.14Fe'''1.04Al0.23Cr0.31Ti0.21O4	0	7.60255	5.42052	38.333	10.8113	35.2559	0	2.57663	0	0	0	0
2000	1019	0.001866	0.003768	-10.0796	0.000389	0.001694	Fe''1.07Mg0.14Fe'''1.05Al0.23Cr0.30Ti0.21O4	0	7.78963	5.32029	38.4874	10.4039	35.4523	0	2.5465	0	0	0	0
2000	1018	0.001889	0.003813	-10.1783	0.000394	0.001715	Fe''1.08Mg0.14Fe'''1.05Al0.22Cr0.29Ti0.22O4	0	7.97955	5.221	38.6341	9.99764	35.6509	0	2.51678	0	0	0	0
2000	1017	0.001912	0.00386	-10.2827	0.000399	0.001736	Fe''1.09Mg0.13Fe'''1.06Al0.22Cr0.28Ti0.22O4	0	8.17217	5.12271	38.7732	9.59291	35.8515	0	2.48749	0	0	0	0
2000	1016	0.001937	0.003909	-10.3929	0.000404	0.001758	Fe''1.10Mg0.13Fe'''1.06Al0.22Cr0.26Ti0.23O4	0	8.36733	5.02551	38.9045	9.18999	36.0541	0	2.45861	0	0	0	0
2000	1015	0.001963	0.00396	-10.5091	0.000409	0.001782	Fe''1.10Mg0.13Fe'''1.07Al0.21Cr0.25Ti0.23O4	0	8.56485	4.92947	39.0279	8.7892	36.2584	0	2.43014	0	0	0	0
2000	1014	0.00199	0.004014	-10.6314	0.000415	0.001806	Fe''1.11Mg0.13Fe'''1.07Al0.21Cr0.24Ti0.24O4	0	8.76456	4.83465	39.1434	8.39083	36.4645	0	2.40209	0	0	0	0
2000	1013	0.002019	0.004069	-10.7601	0.000421	0.001831	Fe''1.12Mg0.13Fe'''1.08Al0.20Cr0.23Ti0.25O4	0	8.96628	4.74111	39.251	7.99514	36.672	0	2.37445	0	0	0	0
2000	1012	0.002048	0.004127	-10.8954	0.000427	0.001858	Fe''1.12Mg0.13Fe'''1.08Al0.20Cr0.22Ti0.25O4	0	9.16981	4.64891	39.3508	7.60241	36.8809	0	2.34721	0	0	0	0
2000	1011	0.002079	0.004188	-11.0373	0.000433	0.001886	Fe''1.13Mg0.13Fe'''1.08Al0.20Cr0.21Ti0.26O4	0	9.37496	4.55809	39.4428	7.21287	37.0909	0	2.32037	0	0	0	0
2000	1010	0.002111	0.004251	-11.1862	0.00044	0.001915	Fe''1.14Mg0.12Fe'''1.09Al0.19Cr0.20Ti0.26O4	0	9.58153	4.46871	39.5271	6.82675	37.302	0	2.29392	0	0	0	0
2000	1009	0.002144	0.004316	-11.3423	0.000447	0.001945	Fe''1.15Mg0.12Fe'''1.09Al0.19Cr0.19Ti0.27O4	0	9.78932	4.3808	39.6038	6.44428	37.5139	0	2.26786	0	0	0	0
2000	1008	0.002179	0.004385	-11.5058	0.000454	0.001976	Fe''1.15Mg0.12Fe'''1.09Al0.18Cr0.18Ti0.27O4	0	9.99812	4.2944	39.6732	6.06564	37.7265	0	2.24218	0	0	0	0
2000	1007	0.002215	0.004456	-11.6773	0.000461	0.002009	Fe''1.16Mg0.12Fe'''1.09Al0.18Cr0.16Ti0.28O4	0	10.2077	4.20954	39.7352	5.69102	37.9396	0	2.21687	0	0	0	0
2000	1006	0.002253	0.00453	-11.8571	0.000469	0.002043	Fe''1.17Mg0.12Fe'''1.10Al0.18Cr0.15Ti0.29O4	0	10.4179	4.12624	39.7902	5.32059	38.1531	0	2.19192	0	0	0	0
2000	1005	0.002292	0.004607	-12.0457	0.000477	0.002078	Fe''1.17Mg0.12Fe'''1.10Al0.17Cr0.14Ti0.29O4	0	10.6286	4.04453	39.8383	4.9545	38.3667	0	2.16734	0	0	0	0
2000	1004	0.002333	0.004688	-12.244	0.000486	0.002116	Fe''1.18Mg0.12Fe'''1.10Al0.17Cr0.13Ti0.30O4	0	10.8393	3.96443	39.8799	4.5929	38.5804	0	2.1431	0	0	0	0
2000	1003	0.002377	0.004772	-12.4529	0.000495	0.002155	Fe''1.19Mg0.12Fe'''1.10Al0.17Cr0.12Ti0.30O4	0	11.0501	3.88595	39.915	4.2359	38.7938	0	2.1192	0	0	0	0
2000	1002	0.002422	0.004861	-12.6737	0.000504	0.002196	Fe''1.20Mg0.11Fe'''1.10Al0.16Cr0.11Ti0.31O4	0	11.2607	3.8091	39.9441	3.88364	39.0069	0	2.09564	0	0	0	0
2000	1001	0.00247	0.004955	-12.9082	0.000514	0.00224	Fe''1.20Mg0.11Fe'''1.10Al0.16Cr0.10Ti0.32O4	0	11.4708	3.73389	39.9673	3.53622	39.2194	0	2.07239	0	0	0	0
2000	1000	0.002521	0.005056	-13.159	0.000525	0.002286	Fe''1.21Mg0.11Fe'''1.10Al0.16Cr0.09Ti0.32O4	0	11.6802	3.66032	39.9851	3.19375	39.4312	0	2.04946	0	0	0	0
2000	999	0.002576	0.005163	-13.4298	0.000536	0.002336	Fe''1.22Mg0.11Fe'''1.11Al0.16Cr0.08Ti0.33O4	0	11.8888	3.58841	39.9976	2.85634	39.6421	0	2.02684	0	0	0	0
2000	998	0.002636	0.00528	-13.7261	0.000549	0.00239	Fe''1.22Mg0.11Fe'''1.11Al0.15Cr0.07Ti0.33O4	0	12.0962	3.51815	40.0052	2.52411	39.8518	0	2.00452	0	0	0	0
2000	997	0.002702	0.00541	-14.0565	0.000562	0.00245	Fe''1.23Mg0.11Fe'''1.11Al0.15Cr0.06Ti0.34O4	0	12.3023	3.44956	40.0082	2.19721	40.0602	0	1.98248	0	0	0	0
2000	996	0.002778	0.005559	-14.4352	0.000578	0.002519	Fe''1.24Mg0.11Fe'''1.11Al0.15Cr0.05Ti0.35O4	0	12.5067	3.38265	40.0072	1.87582	40.2669	0	1.96073	0	0	0	0
2000	995	0.002868	0.005735	-14.8869	0.000597	0.0026	Fe''1.25Mg0.11Fe'''1.11Al0.14Cr0.05Ti0.35O4	0	12.7089	3.31745	40.0025	1.5602	40.4717	0	1.93926	0	0	0	0
2000	994	0.002981	0.005957	-15.4583	0.00062	0.002702	Fe''1.25Mg0.11Fe'''1.11Al0.14Cr0.04Ti0.36O4	0	12.9085	3.25402	39.9946	1.2508	40.674	0	1.91805	0	0	0	0
2000	993	0.003136	0.006263	-16.2497	0.000653	0.002843	Fe''1.26Mg0.10Fe'''1.11Al0.14Cr0.03Ti0.36O4	0	13.1045	3.19246	39.9845	0.948438	40.873	0	1.8971	0	0	0	0
2000	992	0.003384	0.006753	-17.5164	0.000704	0.003068	Fe''1.27Mg0.10Fe'''1.11Al0.14Cr0.02Ti0.37O4	0	13.2951	3.13308	39.9736	0.654884	41.067	0	1.87642	0	0	0	0
2000	991	0.00389	0.007757	-20.12	0.000809	0.003527	Fe''1.27Mg0.10Fe'''1.11Al0.13Cr0.01Ti0.37O4	0	13.4751	3.07668	39.9655	0.375213	41.2515	0	1.85603	0	0	0	0
2000	989	0.015476	0.030809	-79.897	0.003219	0.01403	Fe''1.28Mg0.10Fe'''1.11Al0.13Cr0.00Ti0.38O4	0	13.665	2.9967	40.0528	0	41.4687	0	1.81674	0	0	0	0
2000	988	0.0174	0.034619	-89.7199	0.003618	0.015771	Fe''1.28Mg0.10Fe'''1.12Al0.13Cr0.00Ti0.38O4	0	13.5811	2.98878	40.2142	0	41.4176	0	1.79832	0	0	0	0
2000	987	0.017204	0.034209	-88.6004	0.003576	0.015591	Fe''1.28Mg0.10Fe'''1.12Al0.13Cr0.00Ti0.37O4	0	13.497	2.98092	40.3758	0	41.3662	0	1.78009	0	0	0	0
2000	986	0.017012	0.033807	-87.5018	0.003535	0.015414	Fe''1.28Mg0.10Fe'''1.13Al0.13Cr0.00Ti0.37O4	0	13.4129	2.97313	40.5376	0	41.3143	0	1.76203	0	0	0	0
2000	985	0.016824	0.033412	-86.4236	0.003495	0.01524	Fe''1.27Mg0.10Fe'''1.13Al0.13Cr0.00Ti0.37O4	0	13.3287	2.9654	40.6996	0	41.2622	0	1.74414	0	0	0	0
2000	984	0.016638	0.033024	-85.3651	0.003455	0.015069	Fe''1.27Mg0.10Fe'''1.14Al0.13Cr0.00Ti0.37O4	0	13.2444	2.95775	40.8617	0	41.2097	0	1.72643	0	0	0	0
2000	983	0.016456	0.032643	-84.326	0.003416	0.014902	Fe''1.27Mg0.09Fe'''1.14Al0.13Cr0.00Ti0.37O4	0	13.16	2.95015	41.024	0	41.1569	0	1.70889	0	0	0	0
2000	982	0.016277	0.032268	-83.3057	0.003378	0.014737	Fe''1.27Mg0.09Fe'''1.15Al0.13Cr0.00Ti0.36O4	0	13.0756	2.94262	41.1865	0	41.1038	0	1.69152	0	0	0	0
2000	981	0.016101	0.0319	-82.3039	0.00334	0.014575	Fe''1.27Mg0.09Fe'''1.15Al0.13Cr0.00Ti0.36O4	0	12.991	2.93516	41.3491	0	41.0504	0	1.67432	0	0	0	0
2000	980	0.015928	0.031539	-81.3201	0.003304	0.014416	Fe''1.27Mg0.09Fe'''1.15Al0.13Cr0.00Ti0.36O4	0	12.9065	2.92775	41.5119	0	40.9966	0	1.65729	0	0	0	0
2000	979	0.015758	0.031183	-80.3538	0.003267	0.014259	Fe''1.27Mg0.09Fe'''1.16Al0.13Cr0.00Ti0.36O4	0	12.8218	2.92041	41.6748	0	40.9426	0	1.64042	0	0	0	0
2000	978	0.015591	0.030834	-79.4046	0.003232	0.014106	Fe''1.26Mg0.09Fe'''1.16Al0.13Cr0.00Ti0.35O4	0	12.7371	2.91313	41.8378	0	40.8882	0	1.62371	0	0	0	0
2000	977	0.015427	0.030491	-78.4722	0.003197	0.013955	Fe''1.26Mg0.09Fe'''1.17Al0.13Cr0.00Ti0.35O4	0	12.6524	2.90591	42.001	0	40.8336	0	1.60717	0	0	0	0
2000	976	0.015266	0.030153	-77.5562	0.003162	0.013806	Fe''1.26Mg0.09Fe'''1.17Al0.13Cr0.00Ti0.35O4	0	12.5676	2.89875	42.1642	0	40.7787	0	1.59078	0	0	0	0
2000	975	0.015107	0.029821	-76.6561	0.003128	0.01366	Fe''1.26Mg0.09Fe'''1.18Al0.13Cr0.00Ti0.35O4	0	12.4827	2.89165	42.3276	0	40.7235	0	1.57456	0	0	0	0
2000	974	0.014951	0.029495	-75.7716	0.003095	0.013516	Fe''1.26Mg0.09Fe'''1.18Al0.13Cr0.00Ti0.35O4	0	12.3978	2.88461	42.491	0	40.6681	0	1.55849	0	0	0	0
2000	973	0.014797	0.029174	-74.9023	0.003062	0.013375	Fe''1.26Mg0.09Fe'''1.19Al0.13Cr0.00Ti0.34O4	0	12.3129	2.87762	42.6546	0	40.6124	0	1.54258	0	0	0	0
2000	972	0.014646	0.028859	-74.048	0.00303	0.013236	Fe''1.26Mg0.08Fe'''1.19Al0.13Cr0.00Ti0.34O4	0	12.2279	2.8707	42.8182	0	40.5564	0	1.52682	0	0	0	0
2000	971	0.014497	0.028549	-73.2082	0.002998	0.0131	Fe''1.25Mg0.08Fe'''1.20Al0.13Cr0.00Ti0.34O4	0	12.1429	2.86383	42.9818	0	40.5002	0	1.51121	0	0	0	0
2000	970	0.014351	0.028243	-72.3826	0.002967	0.012965	Fe''1.25Mg0.08Fe'''1.20Al0.12Cr0.00Ti0.34O4	0	12.0579	2.85702	43.1456	0	40.4437	0	1.49575	0	0	0	0
2000	969	0.014207	0.027943	-71.5709	0.002937	0.012833	Fe''1.25Mg0.08Fe'''1.21Al0.12Cr0.00Ti0.33O4	0	11.9729	2.85026	43.3094	0	40.387	0	1.48045	0	0	0	0
2000	968	0.014065	0.027648	-70.7729	0.002907	0.012703	Fe''1.25Mg0.08Fe'''1.21Al0.12Cr0.00Ti0.33O4	0	11.8879	2.84356	43.4732	0	40.3301	0	1.46529	0	0	0	0
2000	967	0.013926	0.027357	-69.9882	0.002877	0.012575	Fe''1.25Mg0.08Fe'''1.22Al0.12Cr0.00Ti0.33O4	0	11.8028	2.83691	43.6371	0	40.2729	0	1.45028	0	0	0	0
2000	966	0.013789	0.027071	-69.2164	0.002848	0.012449	Fe''1.25Mg0.08Fe'''1.22Al0.12Cr0.00Ti0.33O4	0	11.7177	2.83032	43.801	0	40.2155	0	1.43541	0	0	0	0
2000	965	0.013654	0.026789	-68.4574	0.002819	0.012325	Fe''1.25Mg0.08Fe'''1.23Al0.12Cr0.00Ti0.32O4	0	11.6327	2.82378	43.9649	0	40.1579	0	1.42069	0	0	0	0
2000	964	0.013521	0.026512	-67.7109	0.002791	0.012203	Fe''1.24Mg0.08Fe'''1.23Al0.12Cr0.00Ti0.32O4	0	11.5476	2.81729	44.1289	0	40.1001	0	1.4061	0	0	0	0
2000	963	0.01339	0.02624	-66.9765	0.002763	0.012083	Fe''1.24Mg0.08Fe'''1.24Al0.12Cr0.00Ti0.32O4	0	11.4625	2.81085	44.2928	0	40.0421	0	1.39166	0	0	0	0
2000	962	0.013261	0.025971	-66.2541	0.002736	0.011965	Fe''1.24Mg0.08Fe'''1.24Al0.12Cr0.00Ti0.32O4	0	11.3775	2.80447	44.4568	0	39.9839	0	1.37736	0	0	0	0
2000	961	0.013134	0.025707	-65.5433	0.002709	0.011849	Fe''1.24Mg0.08Fe'''1.25Al0.12Cr0.00Ti0.32O4	0	11.2924	2.79813	44.6207	0	39.9255	0	1.3632	0	0	0	0
2000	960	0.01301	0.025447	-64.8439	0.002682	0.011734	Fe''1.24Mg0.07Fe'''1.25Al0.12Cr0.00Ti0.31O4	0	11.2074	2.79185	44.7847	0	39.8669	0	1.34917	0	0	0	0
2000	959	0.012887	0.025191	-64.1558	0.002656	0.011621	Fe''1.24Mg0.07Fe'''1.26Al0.12Cr0.00Ti0.31O4	0	11.1224	2.78561	44.9486	0	39.8081	0	1.33528	0	0	0	0
2000	958	0.012765	0.024938	-63.4786	0.00263	0.01151	Fe''1.24Mg0.07Fe'''1.26Al0.12Cr0.00Ti0.31O4	0	11.0374	2.77943	45.1125	0	39.7492	0	1.32152	0	0	0	0
2000	957	0.012646	0.02469	-62.8121	0.002605	0.011401	Fe''1.23Mg0.07Fe'''1.27Al0.12Cr0.00Ti0.31O4	0	10.9525	2.77329	45.2763	0	39.6901	0	1.30789	0	0	0	0
2000	956	0.012528	0.024445	-62.1561	0.00258	0.011293	Fe''1.23Mg0.07Fe'''1.27Al0.12Cr0.00Ti0.30O4	0	10.8675	2.7672	45.4401	0	39.6308	0	1.2944	0	0	0	0
2000	955	0.012413	0.024204	-61.5103	0.002556	0.011187	Fe''1.23Mg0.07Fe'''1.28Al0.12Cr0.00Ti0.30O4	0	10.7826	2.76115	45.6038	0	39.5714	0	1.28103	0	0	0	0
2000	954	0.012299	0.023967	-60.8747	0.002531	0.011082	Fe''1.23Mg0.07Fe'''1.28Al0.12Cr0.00Ti0.30O4	0	10.6978	2.75516	45.7675	0	39.5118	0	1.2678	0	0	0	0
2000	953	0.012186	0.023733	-60.2489	0.002507	0.010979	Fe''1.23Mg0.07Fe'''1.29Al0.12Cr0.00Ti0.30O4	0	10.613	2.7492	45.9311	0	39.452	0	1.25469	0	0	0	0
2000	952	0.012075	0.023503	-59.6328	0.002484	0.010878	Fe''1.23Mg0.07Fe'''1.29Al0.12Cr0.00Ti0.29O4	0	10.5282	2.7433	46.0946	0	39.3921	0	1.24171	0	0	0	0
2000	951	0.011966	0.023276	-59.0262	0.002461	0.010778	Fe''1.22Mg0.07Fe'''1.30Al0.12Cr0.00Ti0.29O4	0	10.4435	2.73743	46.2581	0	39.3321	0	1.22885	0	0	0	0
2000	950	0.011859	0.023052	-58.4288	0.002438	0.010679	Fe''1.22Mg0.07Fe'''1.30Al0.12Cr0.00Ti0.29O4	0	10.3589	2.73161	46.4214	0	39.272	0	1.21611	0	0	0	0
2000	949	0.011753	0.022832	-57.8406	0.002416	0.010582	Fe''1.22Mg0.07Fe'''1.31Al0.12Cr0.00Ti0.29O4	0	10.2743	2.72584	46.5847	0	39.2117	0	1.2035	0	0	0	0
2000	948	0.011648	0.022615	-57.2613	0.002393	0.010486	Fe''1.22Mg0.07Fe'''1.31Al0.12Cr0.00Ti0.29O4	0	10.1897	2.7201	46.7479	0	39.1513	0	1.191	0	0	0	0
2000	947	0.011545	0.022401	-56.6907	0.002372	0.010392	Fe''1.22Mg0.07Fe'''1.31Al0.12Cr0.00Ti0.28O4	0	10.1052	2.71441	46.9109	0	39.0908	0	1.17863	0	0	0	0
2000	946	0.011444	0.02219	-56.1287	0.00235	0.010299	Fe''1.22Mg0.06Fe'''1.32Al0.12Cr0.00Ti0.28O4	0	10.0208	2.70876	47.0738	0	39.0302	0	1.16638	0	0	0	0
2000	945	0.011343	0.021982	-55.5751	0.002329	0.010207	Fe''1.21Mg0.06Fe'''1.32Al0.12Cr0.00Ti0.28O4	0	9.93652	2.70315	47.2366	0	38.9694	0	1.15424	0	0	0	0
2000	944	0.011245	0.021778	-55.0298	0.002308	0.010117	Fe''1.21Mg0.06Fe'''1.33Al0.12Cr0.00Ti0.28O4	0	9.85228	2.69758	47.3993	0	38.9086	0	1.14222	0	0	0	0
2000	943	0.011147	0.021576	-54.4926	0.002288	0.010028	Fe''1.21Mg0.06Fe'''1.33Al0.12Cr0.00Ti0.27O4	0	9.76811	2.69205	47.5618	0	38.8477	0	1.13031	0	0	0	0
2000	942	0.011051	0.021376	-53.9633	0.002267	0.00994	Fe''1.21Mg0.06Fe'''1.34Al0.12Cr0.00Ti0.27O4	0	9.68403	2.68655	47.7242	0	38.7867	0	1.11852	0	0	0	0
2000	941	0.010957	0.02118	-53.4418	0.002247	0.009853	Fe''1.21Mg0.06Fe'''1.34Al0.12Cr0.00Ti0.27O4	0	9.60003	2.68109	47.8864	0	38.7256	0	1.10684	0	0	0	0
2000	940	0.010864	0.020987	-52.928	0.002228	0.009768	Fe''1.21Mg0.06Fe'''1.35Al0.12Cr0.00Ti0.27O4	0	9.51613	2.67567	48.0485	0	38.6644	0	1.09527	0	0	0	0
2000	939	0.010772	0.020796	-52.4216	0.002208	0.009683	Fe''1.20Mg0.06Fe'''1.35Al0.12Cr0.00Ti0.26O4	0	9.43233	2.67029	48.2104	0	38.6032	0	1.08381	0	0	0	0
2000	938	0.010681	0.020608	-51.9227	0.002189	0.0096	Fe''1.20Mg0.06Fe'''1.36Al0.12Cr0.00Ti0.26O4	0	9.34863	2.66494	48.3721	0	38.5419	0	1.07246	0	0	0	0
2000	937	0.010591	0.020422	-51.4309	0.00217	0.009518	Fe''1.20Mg0.06Fe'''1.36Al0.12Cr0.00Ti0.26O4	0	9.26503	2.65963	48.5336	0	38.4805	0	1.06122	0	0	0	0
2000	936	0.010503	0.020239	-50.9463	0.002151	0.009438	Fe''1.20Mg0.06Fe'''1.37Al0.12Cr0.00Ti0.26O4	0	9.18155	2.65435	48.695	0	38.419	0	1.05008	0	0	0	0
2000	935	0.010416	0.020059	-50.4686	0.002133	0.009358	Fe''1.20Mg0.06Fe'''1.37Al0.12Cr0.00Ti0.26O4	0	9.09817	2.6491	48.8561	0	38.3576	0	1.03905	0	0	0	0
2000	934	0.01033	0.019881	-49.9978	0.002115	0.009279	Fe''1.20Mg0.06Fe'''1.38Al0.12Cr0.00Ti0.25O4	0	9.01491	2.64388	49.017	0	38.296	0	1.02813	0	0	0	0
2000	933	0.010245	0.019705	-49.5337	0.002097	0.009202	Fe''1.19Mg0.06Fe'''1.38Al0.12Cr0.00Ti0.25O4	0	8.93178	2.6387	49.1778	0	38.2345	0	1.01731	0	0	0	0
2000	932	0.010162	0.019532	-49.0761	0.002079	0.009125	Fe''1.19Mg0.06Fe'''1.39Al0.12Cr0.00Ti0.25O4	0	8.84876	2.63355	49.3383	0	38.1728	0	1.00659	0	0	0	0
2000	931	0.010079	0.019361	-48.6251	0.002062	0.00905	Fe''1.19Mg0.06Fe'''1.39Al0.12Cr0.00Ti0.25O4	0	8.76588	2.62842	49.4985	0	38.1112	0	0.995975	0	0	0	0
2000	930	0.009998	0.019193	-48.1804	0.002045	0.008975	Fe''1.19Mg0.05Fe'''1.40Al0.12Cr0.00Ti0.24O4	0	8.68313	2.62333	49.6585	0	38.0495	0	0.985459	0	0	0	0
2000	929	0.009917	0.019026	-47.742	0.002028	0.008902	Fe''1.19Mg0.05Fe'''1.40Al0.12Cr0.00Ti0.24O4	0	8.60052	2.61826	49.8183	0	37.9878	0	0.975043	0	0	0	0
2000	928	0.009838	0.018862	-47.3098	0.002011	0.008829	Fe''1.19Mg0.05Fe'''1.41Al0.12Cr0.00Ti0.24O4	0	8.51804	2.61323	49.9779	0	37.9261	0	0.964725	0	0	0	0
2000	927	0.00976	0.018701	-46.8836	0.001995	0.008758	Fe''1.18Mg0.05Fe'''1.41Al0.11Cr0.00Ti0.24O4	0	8.43572	2.60822	50.1371	0	37.8644	0	0.954505	0	0	0	0
2000	926	0.009683	0.018541	-46.4633	0.001978	0.008687	Fe''1.18Mg0.05Fe'''1.42Al0.11Cr0.00Ti0.23O4	0	8.35354	2.60323	50.2961	0	37.8027	0	0.944382	0	0	0	0
2000	925	0.009607	0.018383	-46.0489	0.001962	0.008617	Fe''1.18Mg0.05Fe'''1.42Al0.11Cr0.00Ti0.23O4	0	8.27152	2.59827	50.4549	0	37.741	0	0.934354	0	0	0	0
2000	924	0.009531	0.018228	-45.6401	0.001946	0.008549	Fe''1.18Mg0.05Fe'''1.42Al0.11Cr0.00Ti0.23O4	0	8.18966	2.59334	50.6133	0	37.6793	0	0.92442	0	0	0	0
2000	923	0.009457	0.018075	-45.2371	0.001931	0.008481	Fe''1.18Mg0.05Fe'''1.43Al0.11Cr0.00Ti0.23O4	0	8.10796	2.58842	50.7715	0	37.6176	0	0.914581	0	0	0	0
2000	922	0.009384	0.017923	-44.8396	0.001915	0.008414	Fe''1.18Mg0.05Fe'''1.43Al0.11Cr0.00Ti0.23O4	0	8.02642	2.58354	50.9293	0	37.5559	0	0.904834	0	0	0	0
2000	921	0.009312	0.017774	-44.4475	0.0019	0.008348	Fe''1.17Mg0.05Fe'''1.44Al0.11Cr0.00Ti0.22O4	0	7.94506	2.57867	51.0869	0	37.4942	0	0.895179	0	0	0	0
2000	920	0.00924	0.017626	-44.0608	0.001885	0.008282	Fe''1.17Mg0.05Fe'''1.44Al0.11Cr0.00Ti0.22O4	0	7.86388	2.57382	51.2441	0	37.4326	0	0.885614	0	0	0	0
2000	919	0.00917	0.017481	-43.6793	0.00187	0.008218	Fe''1.17Mg0.05Fe'''1.45Al0.11Cr0.00Ti0.22O4	0	7.78287	2.56899	51.401	0	37.371	0	0.87614	0	0	0	0
2000	918	0.0091	0.017337	-43.3031	0.001856	0.008154	Fe''1.17Mg0.05Fe'''1.45Al0.11Cr0.00Ti0.22O4	0	7.70205	2.56419	51.5576	0	37.3094	0	0.866755	0	0	0	0
2000	917	0.009031	0.017195	-42.9319	0.001841	0.008092	Fe''1.17Mg0.05Fe'''1.46Al0.11Cr0.00Ti0.21O4	0	7.62142	2.5594	51.7138	0	37.2479	0	0.857458	0	0	0	0
2000	916	0.008964	0.017055	-42.5658	0.001827	0.00803	Fe''1.17Mg0.05Fe'''1.46Al0.11Cr0.00Ti0.21O4	0	7.54099	2.55462	51.8697	0	37.1865	0	0.848249	0	0	0	0
2000	915	0.008897	0.016917	-42.2046	0.001813	0.007968	Fe''1.16Mg0.05Fe'''1.47Al0.11Cr0.00Ti0.21O4	0	7.46076	2.54987	52.0252	0	37.125	0	0.839126	0	0	0	0
2000	914	0.008831	0.016781	-41.8482	0.001799	0.007908	Fe''1.16Mg0.05Fe'''1.47Al0.11Cr0.00Ti0.21O4	0	7.38072	2.54513	52.1804	0	37.0637	0	0.830088	0	0	0	0
2000	913	0.008765	0.016646	-41.4966	0.001785	0.007848	Fe''1.16Mg0.05Fe'''1.48Al0.11Cr0.00Ti0.21O4	0	7.3009	2.5404	52.3352	0	37.0024	0	0.821136	0	0	0	0
2000	912	0.008701	0.016513	-41.1497	0.001772	0.007789	Fe''1.16Mg0.05Fe'''1.48Al0.11Cr0.00Ti0.20O4	0	7.2213	2.53569	52.4896	0	36.9412	0	0.812267	0	0	0	0
2000	911	0.008637	0.016382	-40.8075	0.001759	0.007731	Fe''1.16Mg0.04Fe'''1.49Al0.11Cr0.00Ti0.20O4	0	7.14191	2.53099	52.6436	0	36.8801	0	0.803481	0	0	0	0
2000	910	0.008574	0.016252	-40.4698	0.001745	0.007674	Fe''1.15Mg0.04Fe'''1.49Al0.11Cr0.00Ti0.20O4	0	7.06274	2.5263	52.7972	0	36.819	0	0.794778	0	0	0	0
2000	909	0.008512	0.016124	-40.1365	0.001732	0.007617	Fe''1.15Mg0.04Fe'''1.49Al0.11Cr0.00Ti0.20O4	0	6.98381	2.52162	52.9504	0	36.758	0	0.786156	0	0	0	0
2000	908	0.008451	0.015998	-39.8077	0.001719	0.007561	Fe''1.15Mg0.04Fe'''1.50Al0.11Cr0.00Ti0.19O4	0	6.90511	2.51695	53.1032	0	36.6972	0	0.777615	0	0	0	0
2000	907	0.008391	0.015873	-39.4832	0.001707	0.007506	Fe''1.15Mg0.04Fe'''1.50Al0.11Cr0.00Ti0.19O4	0	6.82664	2.51229	53.2555	0	36.6364	0	0.769154	0	0	0	0
2000	906	0.008331	0.01575	-39.163	0.001694	0.007451	Fe''1.15Mg0.04Fe'''1.51Al0.11Cr0.00Ti0.19O4	0	6.74843	2.50763	53.4074	0	36.5757	0	0.760772	0	0	0	0
2000	905	0.008272	0.015628	-38.8469	0.001682	0.007397	Fe''1.15Mg0.04Fe'''1.51Al0.11Cr0.00Ti0.19O4	0	6.67046	2.50299	53.5589	0	36.5152	0	0.752469	0	0	0	0
2000	904	0.008213	0.015508	-38.535	0.00167	0.007344	Fe''1.14Mg0.04Fe'''1.52Al0.11Cr0.00Ti0.19O4	0	6.59275	2.49835	53.7099	0	36.4548	0	0.744243	0	0	0	0
2000	903	0.008156	0.015389	-38.2272	0.001658	0.007291	Fe''1.14Mg0.04Fe'''1.52Al0.11Cr0.00Ti0.18O4	0	6.5153	2.49371	53.8604	0	36.3945	0	0.736094	0	0	0	0
2000	902	0.008099	0.015272	-37.9234	0.001646	0.007239	Fe''1.14Mg0.04Fe'''1.53Al0.11Cr0.00Ti0.18O4	0	6.43811	2.48907	54.0105	0	36.3343	0	0.728021	0	0	0	0
2000	901	0.008043	0.015156	-37.6235	0.001634	0.007188	Fe''1.14Mg0.04Fe'''1.53Al0.11Cr0.00Ti0.18O4	0	6.3612	2.48444	54.1601	0	36.2743	0	0.720024	0	0	0	0
2000	900	0.007987	0.015042	-37.3275	0.001622	0.007137	Fe''1.14Mg0.04Fe'''1.54Al0.11Cr0.00Ti0.18O4	0	6.28456	2.47981	54.3092	0	36.2144	0	0.712101	0	0	0	0
clinopyroxene_1	thermodynamic	data	and	composition:
Pressure	Temperature	mass	S	H	V	Cp	structure	formula	SiO2	TiO2	Al2O3	Fe2O3	Cr2O3	FeO	MnO	MgO	CaO	Na2O	K2O	H2O
[truncated: 2,588 more rows]
