# Supplementary material for: A 5-km-thick reservoir with > 380,000 km3 of magma within the ancient Earth's crust
Source: Sci Rep. 2022 Sep 19;12:15651. doi: 10.1038/s41598-022-19915-w (PMC9485162; doi:10.1038/s41598-022-19915-w)
Supplement: Supplementary file 21 — Supplementary Information 21. [file 41598_2022_19915_MOESM21_ESM.xlsx]

## Sheet: alphaMELTS_tbl
SupplTable S4B-7 - Fractional crystallization of the mix O70R30
System	Thermodynamic	Data:
Pressure	Temperature	mass	F	phi	S	H	V	dVdP*10^6	dVdT*10^6	Cp	logfO2(absolute)	logfO2-QFM	rhol	rhos	viscosity	aH2O	chisqr
2000	1400	99.9994	1	1	291.451	-1.24102e+06	39.4602	-289.543	2793	151.163	-6.318	0	2.53419	0	2.11	0.0301758	0
2000	1400	99.9994	1	1	291.451	-1.24102e+06	39.4602	-289.543	2793	151.163	-6.318	0	2.53419	0	2.11	0.0301758	0
2000	1399	99.9995	1	1	291.36	-1.24117e+06	39.4574	-289.532	2792.93	151.162	-6.327	0	2.53437	0	2.114	0.0301728	0
2000	1398	99.9995	1	1	291.27	-1.24132e+06	39.4546	-289.521	2792.85	151.162	-6.336	0	2.53455	0	2.118	0.0301698	0
2000	1397	99.9995	1	1	291.18	-1.24147e+06	39.4518	-289.51	2792.78	151.162	-6.345	0	2.53472	0	2.122	0.0301668	0
2000	1396	99.9995	1	1	291.089	-1.24163e+06	39.449	-289.499	2792.7	151.162	-6.353	0	2.5349	0	2.126	0.0301639	0
2000	1395	99.9995	1	1	290.998	-1.24178e+06	39.4463	-289.488	2792.63	151.162	-6.362	0	2.53508	0	2.13	0.0301609	0
2000	1394	99.9995	1	1	290.908	-1.24193e+06	39.4435	-289.478	2792.55	151.162	-6.371	0	2.53526	0	2.134	0.0301579	0
2000	1393	99.9995	1	1	290.817	-1.24208e+06	39.4407	-289.467	2792.48	151.161	-6.38	0	2.53544	0	2.138	0.030155	0
2000	1392	99.9995	1	1	290.726	-1.24223e+06	39.4379	-289.456	2792.4	151.161	-6.388	0	2.53562	0	2.142	0.030152	0
2000	1391	99.9995	1	1	290.636	-1.24238e+06	39.4351	-289.445	2792.32	151.161	-6.397	0	2.5358	0	2.146	0.030149	0
2000	1390	99.9996	1	1	290.545	-1.24253e+06	39.4323	-289.435	2792.24	151.161	-6.406	0	2.53598	0	2.149	0.0301461	0
2000	1389	99.9996	1	1	290.454	-1.24269e+06	39.4296	-289.424	2792.17	151.161	-6.415	0	2.53616	0	2.153	0.0301431	0
2000	1388	99.9996	1	1	290.363	-1.24284e+06	39.4268	-289.413	2792.09	151.16	-6.424	0	2.53634	0	2.157	0.0301402	0
2000	1387	99.9996	1	1	290.272	-1.24299e+06	39.424	-289.403	2792.01	151.16	-6.433	0	2.53652	0	2.161	0.0301373	0
2000	1386	99.9996	1	1	290.181	-1.24314e+06	39.4212	-289.392	2791.93	151.16	-6.442	0	2.53669	0	2.165	0.0301343	0
2000	1385	99.9996	1	1	290.09	-1.24329e+06	39.4184	-289.381	2791.85	151.16	-6.45	0	2.53687	0	2.169	0.0301314	0
2000	1384	99.9996	1	1	289.999	-1.24344e+06	39.4157	-289.37	2791.77	151.16	-6.459	0	2.53705	0	2.173	0.0301285	0
2000	1383	99.9996	1	1	289.907	-1.24359e+06	39.4129	-289.36	2791.7	151.16	-6.468	0	2.53723	0	2.177	0.0301256	0
2000	1382	99.9996	1	1	289.816	-1.24374e+06	39.4101	-289.349	2791.62	151.159	-6.477	0	2.53741	0	2.181	0.0301226	0
2000	1381	99.9997	1	1	289.725	-1.2439e+06	39.4073	-289.339	2791.54	151.159	-6.486	0	2.53759	0	2.185	0.0301197	0
2000	1380	99.9997	1	1	289.633	-1.24405e+06	39.4045	-289.328	2791.46	151.159	-6.495	0	2.53777	0	2.189	0.0301168	0
2000	1379	99.9997	1	1	289.542	-1.2442e+06	39.4017	-289.317	2791.37	151.159	-6.504	0	2.53795	0	2.193	0.0301139	0
2000	1378	99.9997	1	1	289.451	-1.24435e+06	39.399	-289.307	2791.29	151.159	-6.513	0	2.53813	0	2.197	0.030111	0
2000	1377	99.9997	1	1	289.359	-1.2445e+06	39.3962	-289.296	2791.21	151.158	-6.522	0	2.53831	0	2.201	0.0301081	0
2000	1376	99.9997	1	1	289.267	-1.24465e+06	39.3934	-289.286	2791.13	151.158	-6.531	0	2.53849	0	2.205	0.0301053	0
2000	1375	99.9997	1	1	289.176	-1.2448e+06	39.3906	-289.275	2791.05	151.158	-6.54	0	2.53867	0	2.209	0.0301024	0
2000	1374	99.9997	1	1	289.084	-1.24496e+06	39.3878	-289.264	2790.97	151.158	-6.549	0	2.53885	0	2.213	0.0300995	0
2000	1373	99.9998	1	1	288.992	-1.24511e+06	39.3851	-289.254	2790.88	151.158	-6.558	0	2.53903	0	2.217	0.0300966	0
2000	1372	99.9998	1	1	288.9	-1.24526e+06	39.3823	-289.243	2790.8	151.158	-6.567	0	2.53921	0	2.221	0.0300938	0
2000	1371	99.9998	1	1	288.809	-1.24541e+06	39.3795	-289.233	2790.72	151.157	-6.576	0	2.53939	0	2.225	0.0300909	0
2000	1370	99.9998	1	1	288.717	-1.24556e+06	39.3767	-289.222	2790.64	151.157	-6.585	0	2.53957	0	2.229	0.030088	0
2000	1369	99.9998	1	1	288.625	-1.24571e+06	39.374	-289.212	2790.55	151.157	-6.594	0	2.53974	0	2.233	0.0300852	0
2000	1368	99.9998	1	1	288.533	-1.24586e+06	39.3712	-289.201	2790.47	151.157	-6.603	0	2.53993	0	2.238	0.0300823	0
2000	1367	99.9998	1	1	288.441	-1.24601e+06	39.3684	-289.191	2790.38	151.157	-6.612	0	2.5401	0	2.242	0.0300795	0
2000	1366	99.9999	1	1	288.348	-1.24617e+06	39.3656	-289.18	2790.3	151.157	-6.621	0	2.54028	0	2.246	0.0300766	0
2000	1365	99.9999	1	1	288.256	-1.24632e+06	39.3628	-289.17	2790.21	151.156	-6.63	0	2.54046	0	2.25	0.0300738	0
2000	1364	99.9999	1	1	288.164	-1.24647e+06	39.3601	-289.159	2790.13	151.156	-6.64	0	2.54064	0	2.254	0.030071	0
2000	1363	99.9999	1	1	288.072	-1.24662e+06	39.3573	-289.149	2790.04	151.156	-6.649	0	2.54082	0	2.258	0.0300682	0
2000	1362	99.9999	1	1	287.979	-1.24677e+06	39.3545	-289.139	2789.96	151.156	-6.658	0	2.541	0	2.262	0.0300653	0
2000	1361	99.9999	1	1	287.887	-1.24692e+06	39.3517	-289.128	2789.87	151.156	-6.667	0	2.54118	0	2.266	0.0300625	0
2000	1360	99.9999	1	1	287.794	-1.24707e+06	39.349	-289.118	2789.79	151.156	-6.676	0	2.54136	0	2.27	0.0300597	0
2000	1359	99.9999	1	1	287.702	-1.24723e+06	39.3462	-289.107	2789.7	151.155	-6.685	0	2.54154	0	2.274	0.0300569	0
2000	1358	100	1	1	287.609	-1.24738e+06	39.3434	-289.097	2789.61	151.155	-6.694	0	2.54172	0	2.278	0.0300541	0
2000	1357	100	1	1	287.516	-1.24753e+06	39.3406	-289.087	2789.52	151.155	-6.704	0	2.5419	0	2.282	0.0300513	0
2000	1356	100	1	1	287.424	-1.24768e+06	39.3378	-289.076	2789.44	151.155	-6.713	0	2.54208	0	2.287	0.0300486	0
2000	1355	100	1	1	287.331	-1.24783e+06	39.3351	-289.066	2789.35	151.155	-6.722	0	2.54226	0	2.291	0.0300458	0
2000	1354	100	1	1	287.238	-1.24798e+06	39.3323	-289.056	2789.26	151.155	-6.731	0	2.54244	0	2.295	0.030043	0
2000	1353	100	1	1	287.145	-1.24813e+06	39.3295	-289.045	2789.17	151.154	-6.741	0	2.54262	0	2.299	0.0300402	0
2000	1352	100	1	1	287.052	-1.24828e+06	39.3267	-289.035	2789.08	151.154	-6.75	0	2.5428	0	2.303	0.0300375	0
2000	1351	100	1	1	286.959	-1.24844e+06	39.324	-289.025	2788.99	151.154	-6.759	0	2.54298	0	2.307	0.0300347	0
2000	1350	100	1	1	286.866	-1.24859e+06	39.3212	-289.014	2788.9	151.154	-6.768	0	2.54316	0	2.311	0.030032	0
2000	1349	100	1	1	286.773	-1.24874e+06	39.3184	-289.004	2788.81	151.154	-6.778	0	2.54334	0	2.315	0.0300292	0
2000	1348	100	1	1	286.68	-1.24889e+06	39.3156	-288.994	2788.72	151.154	-6.787	0	2.54352	0	2.32	0.0300265	0
2000	1347	100	1	1	286.587	-1.24904e+06	39.3129	-288.984	2788.63	151.154	-6.796	0	2.5437	0	2.324	0.0300237	0
2000	1346	100	1	1	286.493	-1.24919e+06	39.3101	-288.973	2788.54	151.153	-6.806	0	2.54388	0	2.328	0.030021	0
2000	1345	100	1	1	286.4	-1.24934e+06	39.3073	-288.963	2788.45	151.153	-6.815	0	2.54406	0	2.332	0.0300183	0
2000	1344	100	1	1	286.307	-1.2495e+06	39.3045	-288.953	2788.36	151.153	-6.824	0	2.54424	0	2.336	0.0300156	0
2000	1343	100	1	1	286.213	-1.24965e+06	39.3018	-288.943	2788.27	151.153	-6.834	0	2.54442	0	2.34	0.0300129	0
2000	1342	100	1	1	286.12	-1.2498e+06	39.299	-288.933	2788.18	151.153	-6.843	0	2.5446	0	2.345	0.0300102	0
2000	1341	100	1	1	286.026	-1.24995e+06	39.2962	-288.922	2788.09	151.153	-6.852	0	2.54478	0	2.349	0.0300075	0
2000	1340	100	1	1	285.932	-1.2501e+06	39.2935	-288.912	2787.99	151.152	-6.862	0	2.54496	0	2.353	0.0300048	0
2000	1339	100	1	1	285.839	-1.25025e+06	39.2907	-288.902	2787.9	151.152	-6.871	0	2.54514	0	2.357	0.0300021	0
2000	1338	100	1	1	285.745	-1.2504e+06	39.2879	-288.892	2787.81	151.152	-6.88	0	2.54532	0	2.361	0.0299994	0
2000	1337	100	1	1	285.651	-1.25056e+06	39.2851	-288.882	2787.72	151.152	-6.89	0	2.5455	0	2.366	0.0299967	0
2000	1336	100	1	1	285.557	-1.25071e+06	39.2824	-288.872	2787.62	151.152	-6.899	0	2.54568	0	2.37	0.029994	0
2000	1335	100	1	1	285.463	-1.25086e+06	39.2796	-288.862	2787.53	151.152	-6.909	0	2.54586	0	2.374	0.0299914	0
2000	1334	100	1	1	285.369	-1.25101e+06	39.2768	-288.851	2787.43	151.152	-6.918	0	2.54604	0	2.378	0.0299887	0
2000	1333	100	1	1	285.275	-1.25116e+06	39.274	-288.841	2787.34	151.151	-6.928	0	2.54622	0	2.383	0.0299861	0
2000	1332	100	1	1	285.181	-1.25131e+06	39.2713	-288.831	2787.24	151.151	-6.937	0	2.5464	0	2.387	0.0299834	0
2000	1331	100	1	1	285.087	-1.25146e+06	39.2685	-288.821	2787.15	151.151	-6.947	0	2.54658	0	2.391	0.0299808	0
2000	1330	100	1	1	284.993	-1.25162e+06	39.2657	-288.811	2787.05	151.151	-6.956	0	2.54676	0	2.395	0.0299781	0
2000	1329	100	1	1	284.899	-1.25177e+06	39.263	-288.801	2786.96	151.151	-6.966	0	2.54694	0	2.4	0.0299755	0
2000	1328	100	1	1	284.804	-1.25192e+06	39.2602	-288.791	2786.86	151.151	-6.975	0	2.54712	0	2.404	0.0299729	0
2000	1327	100	1	1	284.71	-1.25207e+06	39.2574	-288.781	2786.77	151.151	-6.985	0	2.5473	0	2.408	0.0299703	0
2000	1326	100	1	1	284.616	-1.25222e+06	39.2547	-288.771	2786.67	151.15	-6.994	0	2.54748	0	2.412	0.0299677	0
2000	1325	100.001	1	1	284.521	-1.25237e+06	39.2519	-288.761	2786.57	151.15	-7.004	0	2.54766	0	2.417	0.0299651	0
2000	1324	100.001	1	1	284.426	-1.25252e+06	39.2491	-288.751	2786.47	151.15	-7.013	0	2.54784	0	2.421	0.0299625	0
2000	1323	100.001	1	1	284.332	-1.25268e+06	39.2463	-288.741	2786.38	151.15	-7.023	0	2.54802	0	2.425	0.0299599	0
2000	1322	100.001	1	1	284.237	-1.25283e+06	39.2436	-288.731	2786.28	151.15	-7.033	0	2.5482	0	2.429	0.0299573	0
2000	1321	100.001	1	1	284.142	-1.25298e+06	39.2408	-288.721	2786.18	151.15	-7.042	0	2.54838	0	2.434	0.0299547	0
2000	1320	100.001	1	1	284.048	-1.25313e+06	39.238	-288.711	2786.08	151.15	-7.052	0	2.54856	0	2.438	0.0299522	0
2000	1319	100.001	1	1	283.953	-1.25328e+06	39.2353	-288.702	2785.98	151.149	-7.062	0	2.54874	0	2.442	0.0299496	0
2000	1318	100.001	1	1	283.858	-1.25343e+06	39.2325	-288.692	2785.89	151.149	-7.071	0	2.54892	0	2.447	0.0299471	0
2000	1317	100.001	1	1	283.763	-1.25358e+06	39.2297	-288.682	2785.79	151.149	-7.081	0	2.5491	0	2.451	0.0299445	0
2000	1316	100.001	1	1	283.668	-1.25374e+06	39.227	-288.672	2785.69	151.149	-7.09	0	2.54928	0	2.455	0.029942	0
2000	1315	100.001	1	1	283.573	-1.25389e+06	39.2242	-288.662	2785.59	151.149	-7.1	0	2.54947	0	2.46	0.0299394	0
2000	1314	100.001	1	1	283.478	-1.25404e+06	39.2214	-288.652	2785.49	151.149	-7.11	0	2.54965	0	2.464	0.0299369	0
2000	1313	100.001	1	1	283.382	-1.25419e+06	39.2187	-288.642	2785.39	151.149	-7.12	0	2.54983	0	2.468	0.0299344	0
2000	1312	100.001	1	1	283.287	-1.25434e+06	39.2159	-288.632	2785.28	151.149	-7.129	0	2.55001	0	2.473	0.0299319	0
2000	1311	100.001	1	1	283.192	-1.25449e+06	39.2131	-288.623	2785.18	151.148	-7.139	0	2.55019	0	2.477	0.0299294	0
2000	1310	100.001	1	1	283.096	-1.25464e+06	39.2104	-288.613	2785.08	151.148	-7.149	0	2.55037	0	2.481	0.0299269	0
2000	1309	100.001	1	1	283.001	-1.2548e+06	39.2076	-288.603	2784.98	151.148	-7.159	0	2.55055	0	2.486	0.0299244	0
2000	1308	100.001	1	1	282.905	-1.25495e+06	39.2048	-288.593	2784.88	151.148	-7.168	0	2.55073	0	2.49	0.0299219	0
2000	1307	100.001	1	1	282.81	-1.2551e+06	39.2021	-288.584	2784.78	151.148	-7.178	0	2.55091	0	2.494	0.0299194	0
2000	1306	100.001	1	1	282.714	-1.25525e+06	39.1993	-288.574	2784.67	151.148	-7.188	0	2.55109	0	2.499	0.0299169	0
2000	1305	100.001	1	1	282.618	-1.2554e+06	39.1965	-288.564	2784.57	151.148	-7.198	0	2.55127	0	2.503	0.0299145	0
2000	1304	100.001	1	1	282.523	-1.25555e+06	39.1938	-288.554	2784.47	151.148	-7.208	0	2.55145	0	2.508	0.029912	0
2000	1303	100.001	1	1	282.427	-1.2557e+06	39.191	-288.545	2784.36	151.147	-7.217	0	2.55163	0	2.512	0.0299096	0
2000	1302	100.001	1	1	282.331	-1.25586e+06	39.1882	-288.535	2784.26	151.147	-7.227	0	2.55181	0	2.516	0.0299071	0
2000	1301	100.001	1	1	282.235	-1.25601e+06	39.1855	-288.525	2784.16	151.147	-7.237	0	2.55199	0	2.521	0.0299047	0
2000	1300	100.001	1	1	282.139	-1.25616e+06	39.1827	-288.516	2784.05	151.147	-7.247	0	2.55217	0	2.525	0.0299023	0
2000	1299	100.001	1	1	282.043	-1.25631e+06	39.1799	-288.506	2783.95	151.147	-7.257	0	2.55235	0	2.53	0.0298999	0
2000	1298	100.001	1	1	281.947	-1.25646e+06	39.1772	-288.496	2783.84	151.147	-7.267	0	2.55253	0	2.534	0.0298975	0
2000	1297	100.001	1	1	281.851	-1.25661e+06	39.1744	-288.487	2783.74	151.147	-7.277	0	2.55272	0	2.538	0.029895	0
2000	1296	100.001	1	1	281.754	-1.25676e+06	39.1716	-288.477	2783.63	151.147	-7.287	0	2.5529	0	2.543	0.0298927	0
2000	1295	100.001	1	1	281.658	-1.25692e+06	39.1689	-288.467	2783.53	151.146	-7.296	0	2.55308	0	2.547	0.0298903	0
2000	1294	100.001	1	1	281.562	-1.25707e+06	39.1661	-288.458	2783.42	151.146	-7.306	0	2.55326	0	2.552	0.0298879	0
2000	1293	100.001	1	1	281.465	-1.25722e+06	39.1633	-288.448	2783.31	151.146	-7.316	0	2.55344	0	2.556	0.0298855	0
2000	1292	100.001	1	1	281.369	-1.25737e+06	39.1606	-288.439	2783.21	151.146	-7.326	0	2.55362	0	2.561	0.0298831	0
2000	1291	100.001	1	1	281.272	-1.25752e+06	39.1578	-288.429	2783.1	151.146	-7.336	0	2.5538	0	2.565	0.0298808	0
2000	1290	100.001	1	1	281.176	-1.25767e+06	39.1551	-288.42	2782.99	151.146	-7.346	0	2.55398	0	2.57	0.0298784	0
2000	1289	100.001	1	1	281.079	-1.25782e+06	39.1523	-288.41	2782.88	151.146	-7.356	0	2.55416	0	2.574	0.0298761	0
2000	1288	100.001	1	1	280.982	-1.25798e+06	39.1495	-288.401	2782.78	151.146	-7.366	0	2.55434	0	2.579	0.0298738	0
2000	1287	100.001	1	1	280.885	-1.25813e+06	39.1468	-288.391	2782.67	151.146	-7.376	0	2.55452	0	2.583	0.0298714	0
2000	1286	100.001	1	1	280.789	-1.25828e+06	39.144	-288.382	2782.56	151.145	-7.386	0	2.5547	0	2.588	0.0298691	0
2000	1285	100.001	1	1	280.692	-1.25843e+06	39.1412	-288.372	2782.45	151.145	-7.396	0	2.55488	0	2.592	0.0298668	0
2000	1284	100.001	1	1	280.595	-1.25858e+06	39.1385	-288.363	2782.34	151.145	-7.407	0	2.55506	0	2.597	0.0298645	0
2000	1283	100.001	1	1	280.498	-1.25873e+06	39.1357	-288.353	2782.23	151.145	-7.417	0	2.55525	0	2.601	0.0298622	0
2000	1282	100.001	1	1	280.401	-1.25888e+06	39.133	-288.344	2782.12	151.145	-7.427	0	2.55543	0	2.606	0.0298599	0
2000	1281	100.001	1	1	280.303	-1.25904e+06	39.1302	-288.334	2782.01	151.145	-7.437	0	2.55561	0	2.61	0.0298577	0
2000	1280	100.001	1	1	280.206	-1.25919e+06	39.1274	-288.325	2781.9	151.145	-7.447	0	2.55579	0	2.615	0.0298554	0
2000	1279	100.002	1	1	280.109	-1.25934e+06	39.1247	-288.315	2781.79	151.145	-7.457	0	2.55597	0	2.619	0.0298531	0
2000	1278	100.002	1	1	280.011	-1.25949e+06	39.1219	-288.306	2781.68	151.145	-7.467	0	2.55615	0	2.624	0.0298509	0
2000	1277	100.002	1	1	279.914	-1.25964e+06	39.1192	-288.297	2781.57	151.144	-7.477	0	2.55633	0	2.628	0.0298487	0
2000	1276	100.002	1	1	279.817	-1.25979e+06	39.1164	-288.287	2781.46	151.144	-7.488	0	2.55651	0	2.633	0.0298464	0
2000	1275	100.002	1	1	279.719	-1.25995e+06	39.1136	-288.278	2781.35	151.144	-7.498	0	2.55669	0	2.637	0.0298442	0
2000	1274	100.002	1	1	279.621	-1.2601e+06	39.1109	-288.269	2781.24	151.144	-7.508	0	2.55687	0	2.642	0.029842	0
2000	1273	100.002	1	1	279.524	-1.26025e+06	39.1081	-288.259	2781.12	151.144	-7.518	0	2.55706	0	2.646	0.0298398	0
2000	1272	100.002	1	1	279.426	-1.2604e+06	39.1054	-288.25	2781.01	151.144	-7.528	0	2.55724	0	2.651	0.0298376	0
2000	1271	100.002	1	1	279.328	-1.26055e+06	39.1026	-288.241	2780.9	151.144	-7.539	0	2.55742	0	2.656	0.0298354	0
2000	1270	100.002	1	1	279.23	-1.2607e+06	39.0999	-288.232	2780.78	151.144	-7.549	0	2.5576	0	2.66	0.0298332	0
2000	1269	100.002	1	1	279.132	-1.26085e+06	39.0971	-288.222	2780.67	151.144	-7.559	0	2.55778	0	2.665	0.029831	0
2000	1268	100.002	1	1	279.034	-1.26101e+06	39.0943	-288.213	2780.56	151.144	-7.57	0	2.55796	0	2.669	0.0298289	0
2000	1267	100.002	1	1	278.936	-1.26116e+06	39.0916	-288.204	2780.44	151.143	-7.58	0	2.55814	0	2.674	0.0298267	0
2000	1266	100.002	1	1	278.838	-1.26131e+06	39.0888	-288.195	2780.33	151.143	-7.59	0	2.55832	0	2.679	0.0298246	0
2000	1265	100.002	1	1	278.74	-1.26146e+06	39.0861	-288.185	2780.21	151.143	-7.6	0	2.5585	0	2.683	0.0298224	0
2000	1264	100.002	1	1	278.642	-1.26161e+06	39.0833	-288.176	2780.1	151.143	-7.611	0	2.55869	0	2.688	0.0298203	0
2000	1263	100.002	1	1	278.544	-1.26176e+06	39.0806	-288.167	2779.98	151.143	-7.621	0	2.55887	0	2.692	0.0298182	0
2000	1262	100.002	1	1	278.445	-1.26191e+06	39.0778	-288.158	2779.87	151.143	-7.632	0	2.55905	0	2.697	0.0298161	0
2000	1261	100.002	1	1	278.347	-1.26207e+06	39.075	-288.149	2779.75	151.143	-7.642	0	2.55923	0	2.702	0.029814	0
2000	1260	100.002	1	1	278.248	-1.26222e+06	39.0723	-288.139	2779.64	151.143	-7.652	0	2.55941	0	2.706	0.0298119	0
2000	1259	100.002	1	1	278.15	-1.26237e+06	39.0695	-288.13	2779.52	151.143	-7.663	0	2.55959	0	2.711	0.0298098	0
2000	1258	100.002	1	1	278.051	-1.26252e+06	39.0668	-288.121	2779.4	151.143	-7.673	0	2.55977	0	2.716	0.0298077	0
2000	1257	100.002	1	1	277.952	-1.26267e+06	39.064	-288.112	2779.29	151.143	-7.684	0	2.55995	0	2.72	0.0298057	0
2000	1256	100.002	1	1	277.854	-1.26282e+06	39.0613	-288.103	2779.17	151.142	-7.694	0	2.56013	0	2.725	0.0298036	0
2000	1255	100.002	1	1	277.755	-1.26298e+06	39.0585	-288.094	2779.05	151.142	-7.704	0	2.56032	0	2.73	0.0298016	0
2000	1254	100.002	1	1	277.656	-1.26313e+06	39.0558	-288.085	2778.93	151.142	-7.715	0	2.5605	0	2.734	0.0297995	0
2000	1253	100.002	1	1	277.557	-1.26328e+06	39.053	-288.076	2778.82	151.142	-7.725	0	2.56068	0	2.739	0.0297975	0
2000	1252	100.002	1	1	277.458	-1.26343e+06	39.0502	-288.067	2778.7	151.142	-7.736	0	2.56086	0	2.744	0.0297955	0
2000	1251	100.002	1	1	277.359	-1.26358e+06	39.0475	-288.058	2778.58	151.142	-7.746	0	2.56104	0	2.748	0.0297935	0
2000	1250	100.002	1	1	277.26	-1.26373e+06	39.0447	-288.049	2778.46	151.142	-7.757	0	2.56122	0	2.753	0.0297915	0
2000	1249	100.002	1	1	277.161	-1.26389e+06	39.042	-288.04	2778.34	151.142	-7.767	0	2.56141	0	2.758	0.0297895	0
2000	1248	100.002	1	1	277.061	-1.26404e+06	39.0392	-288.031	2778.22	151.142	-7.778	0	2.56159	0	2.763	0.0297875	0
2000	1247	100.002	1	1	276.962	-1.26419e+06	39.0365	-288.022	2778.1	151.142	-7.789	0	2.56177	0	2.767	0.0297856	0
2000	1246	100.002	1	1	276.863	-1.26434e+06	39.0337	-288.013	2777.98	151.142	-7.799	0	2.56195	0	2.772	0.0297836	0
2000	1245	100.002	1	1	276.763	-1.26449e+06	39.031	-288.004	2777.86	151.142	-7.81	0	2.56213	0	2.777	0.0297817	0
2000	1244	100.002	1	1	276.664	-1.26464e+06	39.0282	-287.995	2777.74	151.142	-7.82	0	2.56231	0	2.781	0.0297798	0
2000	1243	100.003	1	1	276.564	-1.26479e+06	39.0255	-287.986	2777.62	151.141	-7.831	0	2.56249	0	2.786	0.0297778	0
2000	1242	100.003	1	1	276.464	-1.26495e+06	39.0227	-287.977	2777.5	151.141	-7.842	0	2.56268	0	2.791	0.0297759	0
2000	1241	100.003	1	1	276.365	-1.2651e+06	39.02	-287.968	2777.37	151.141	-7.852	0	2.56286	0	2.796	0.029774	0
2000	1240	100.003	1	1	276.265	-1.26525e+06	39.0172	-287.96	2777.25	151.141	-7.863	0	2.56304	0	2.801	0.0297721	0
2000	1239	100.003	1	1	276.165	-1.2654e+06	39.0145	-287.951	2777.13	151.141	-7.874	0	2.56322	0	2.805	0.0297702	0
2000	1238	100.003	1	1	276.065	-1.26555e+06	39.0117	-287.942	2777.01	151.141	-7.884	0	2.5634	0	2.81	0.0297684	0
2000	1237	100.003	1	1	275.965	-1.2657e+06	39.009	-287.933	2776.89	151.141	-7.895	0	2.56358	0	2.815	0.0297665	0
2000	1236	100.003	1	1	275.865	-1.26586e+06	39.0062	-287.924	2776.76	151.141	-7.906	0	2.56376	0	2.82	0.0297647	0
2000	1235	100.003	1	1	275.765	-1.26601e+06	39.0035	-287.916	2776.64	151.141	-7.917	0	2.56394	0	2.824	0.0297628	0
2000	1234	100.003	1	1	275.665	-1.26616e+06	39.0007	-287.907	2776.52	151.141	-7.927	0	2.56413	0	2.829	0.029761	0
2000	1233	100.003	1	1	275.564	-1.26631e+06	38.998	-287.898	2776.39	151.141	-7.938	0	2.56431	0	2.834	0.0297592	0
2000	1232	100.003	1	1	275.464	-1.26646e+06	38.9952	-287.889	2776.27	151.141	-7.949	0	2.56449	0	2.839	0.0297574	0
2000	1231	100.003	1	1	275.364	-1.26661e+06	38.9925	-287.881	2776.14	151.141	-7.96	0	2.56467	0	2.844	0.0297556	0
2000	1230	100.003	1	1	275.263	-1.26677e+06	38.9897	-287.872	2776.02	151.141	-7.97	0	2.56485	0	2.849	0.0297538	0
2000	1229	100.003	1	1	275.163	-1.26692e+06	38.987	-287.863	2775.89	151.141	-7.981	0	2.56503	0	2.853	0.029752	0
2000	1228	100.003	1	1	275.062	-1.26707e+06	38.9842	-287.854	2775.77	151.14	-7.992	0	2.56522	0	2.858	0.0297502	0
2000	1227	100.003	1	1	274.961	-1.26722e+06	38.9815	-287.846	2775.64	151.14	-8.003	0	2.5654	0	2.863	0.0297485	0
2000	1226	100.003	1	1	274.861	-1.26737e+06	38.9787	-287.837	2775.52	151.14	-8.014	0	2.56558	0	2.868	0.0297467	0
2000	1225	100.003	1	1	274.76	-1.26752e+06	38.976	-287.828	2775.39	151.14	-8.025	0	2.56576	0	2.873	0.029745	0
2000	1224	100.003	1	1	274.659	-1.26768e+06	38.9732	-287.82	2775.26	151.14	-8.036	0	2.56594	0	2.878	0.0297433	0
2000	1223	100.003	1	1	274.558	-1.26783e+06	38.9705	-287.811	2775.14	151.14	-8.047	0	2.56612	0	2.883	0.0297416	0
2000	1222	100.003	1	1	274.457	-1.26798e+06	38.9678	-287.803	2775.01	151.14	-8.057	0	2.56631	0	2.887	0.0297399	0
2000	1221	100.003	1	1	274.356	-1.26813e+06	38.965	-287.794	2774.88	151.14	-8.068	0	2.56649	0	2.892	0.0297382	0
2000	1220	100.003	1	1	274.255	-1.26828e+06	38.9623	-287.785	2774.75	151.14	-8.079	0	2.56667	0	2.897	0.0297365	0
2000	1219	100.003	1	1	274.154	-1.26843e+06	38.9595	-287.777	2774.63	151.14	-8.09	0	2.56685	0	2.902	0.0297349	0
2000	1218	100.003	1	1	274.053	-1.26858e+06	38.9568	-287.768	2774.5	151.14	-8.101	0	2.56703	0	2.907	0.0297332	0
2000	1217	100.003	1	1	273.951	-1.26874e+06	38.954	-287.76	2774.37	151.14	-8.112	0	2.56722	0	2.912	0.0297316	0
2000	1216	100.003	1	1	273.85	-1.26889e+06	38.9513	-287.751	2774.24	151.14	-8.123	0	2.5674	0	2.917	0.02973	0
2000	1215	100.003	1	1	273.748	-1.26904e+06	38.9485	-287.743	2774.11	151.14	-8.134	0	2.56758	0	2.922	0.0297283	0
2000	1214	100.003	1	1	273.647	-1.26919e+06	38.9458	-287.734	2773.98	151.14	-8.145	0	2.56776	0	2.927	0.0297267	0
2000	1213	100.003	1	1	273.545	-1.26934e+06	38.943	-287.726	2773.85	151.14	-8.156	0	2.56794	0	2.932	0.0297251	0
2000	1212	100.004	1	1	273.444	-1.26949e+06	38.9403	-287.717	2773.72	151.14	-8.168	0	2.56812	0	2.937	0.0297236	0
2000	1211	100.004	1	1	273.342	-1.26965e+06	38.9376	-287.709	2773.59	151.14	-8.179	0	2.56831	0	2.942	0.029722	0
2000	1210	100.004	1	1	273.24	-1.2698e+06	38.9348	-287.701	2773.46	151.14	-8.19	0	2.56849	0	2.947	0.0297204	0
2000	1209	100.004	1	1	273.138	-1.26995e+06	38.9321	-287.692	2773.33	151.14	-8.201	0	2.56867	0	2.951	0.0297189	0
2000	1208	100.004	0.997804	0.998237	272.982	-1.27018e+06	38.9186	-287.394	2770.46	151.056	-8.212	0	2.56844	3.20129	2.961	0.0297882	0
2000	1207	99.7849	0.998601	0.998877	272.31	-1.26756e+06	38.8407	-287.15	2765.71	150.723	-8.223	0	2.56837	3.20179	2.969	0.0298315	0
2000	1206	99.6462	0.998604	0.99888	271.838	-1.26597e+06	38.7879	-286.925	2762.02	145.957	-8.234	0	2.56829	3.20228	2.977	0.0298746	0
2000	1205	99.5081	0.998608	0.998884	271.367	-1.26439e+06	38.7354	-286.702	2758.35	145.732	-8.245	0	2.56821	3.20277	2.985	0.0299177	0
2000	1204	99.3704	0.992288	0.993071	270.756	-1.26302e+06	38.6681	-285.412	2746.82	145.343	-8.257	0	2.5678	2.86048	2.993	0.030312	0
2000	1203	98.6056	0.985545	0.986865	268.457	-1.25341e+06	38.3611	-282.72	2720.77	144.001	-8.268	0	2.56702	2.82884	3.001	0.0310972	0
2000	1202	97.1819	0.985765	0.987069	264.555	-1.23489e+06	37.8192	-279.8	2688.62	141.851	-8.279	0	2.56625	2.82884	3.01	0.031889	0
2000	1201	95.8002	0.985979	0.987267	260.767	-1.21692e+06	37.2933	-276.961	2657.41	139.764	-8.29	0	2.56548	2.82885	3.018	0.0326874	0
2000	1200	94.4586	0.986186	0.98746	257.089	-1.19948e+06	36.7826	-274.202	2627.1	137.738	-8.302	0	2.56471	2.82886	3.026	0.0334921	0
2000	1199	93.1555	0.986388	0.987647	253.516	-1.18254e+06	36.2865	-271.518	2597.65	135.771	-8.313	0	2.56395	2.82888	3.035	0.0343031	0
2000	1198	91.8891	0.986584	0.987829	250.043	-1.16608e+06	35.8043	-268.906	2569.03	133.86	-8.324	0	2.56319	2.8289	3.043	0.0351203	0
2000	1197	90.658	0.986775	0.988006	246.667	-1.15008e+06	35.3356	-266.363	2541.2	132.002	-8.335	0	2.56244	2.82892	3.051	0.0359436	0
2000	1196	89.4608	0.98696	0.988177	243.383	-1.13453e+06	34.8796	-263.887	2514.13	130.195	-8.347	0	2.56168	2.82895	3.059	0.0367729	0
2000	1195	88.2959	0.98714	0.988345	240.187	-1.1194e+06	34.436	-261.474	2487.78	128.437	-8.358	0	2.56094	2.82898	3.067	0.0376081	0
2000	1194	87.1621	0.987316	0.988507	237.077	-1.10468e+06	34.0041	-259.123	2462.14	126.727	-8.369	0	2.56019	2.82902	3.075	0.0384491	0
2000	1193	86.0583	0.987487	0.988666	234.048	-1.09036e+06	33.5837	-256.831	2437.16	125.063	-8.381	0	2.55945	2.82905	3.083	0.0392958	0
2000	1192	84.9832	0.987654	0.98882	231.098	-1.0764e+06	33.1741	-254.595	2412.83	123.441	-8.392	0	2.55871	2.8291	3.091	0.0401481	0
2000	1191	83.9356	0.987816	0.988971	228.223	-1.06281e+06	32.775	-252.414	2389.12	121.862	-8.404	0	2.55797	2.82915	3.099	0.041006	0
2000	1190	82.9147	0.987974	0.989117	225.42	-1.04957e+06	32.386	-250.286	2366.01	120.323	-8.415	0	2.55724	2.8292	3.107	0.0418693	0
2000	1189	81.9193	0.988128	0.98926	222.688	-1.03666e+06	32.0067	-248.208	2343.47	118.823	-8.426	0	2.55651	2.82925	3.115	0.0427379	0
2000	1188	80.9485	0.985667	0.987416	219.954	-1.02417e+06	31.624	-246.005	2319.3	117.274	-8.438	0	2.55518	2.91547	3.128	0.0437519	0
2000	1187	79.7909	0.986591	0.988148	216.825	-1.0093e+06	31.192	-243.866	2293.28	115.548	-8.449	0	2.55403	2.89402	3.139	0.0447329	0
2000	1186	78.7237	0.986793	0.98833	213.916	-995588	30.7892	-241.796	2268.85	113.937	-8.461	0	2.55288	2.89355	3.15	0.0457191	0
2000	1185	77.6868	0.986989	0.988507	211.089	-982262	30.3978	-239.781	2245.1	112.372	-8.472	0	2.55174	2.89309	3.161	0.0467103	0
2000	1184	76.6788	0.98718	0.988679	208.34	-969311	30.0173	-237.819	2222.01	110.851	-8.484	0	2.55061	2.89262	3.172	0.0477067	0
2000	1183	75.6985	0.987366	0.988846	205.666	-956719	29.6472	-235.906	2199.55	109.372	-8.495	0	2.54949	2.89215	3.183	0.0487079	0
2000	1182	74.7449	0.987546	0.989008	203.065	-944471	29.287	-234.042	2177.7	107.934	-8.507	0	2.54838	2.89167	3.194	0.0497139	0
2000	1181	73.8168	0.987722	0.989166	200.533	-932553	28.9364	-232.224	2156.44	106.534	-8.518	0	2.54727	2.8912	3.205	0.0507247	0
2000	1180	72.9132	0.987892	0.98932	198.067	-920952	28.5951	-230.451	2135.73	105.172	-8.53	0	2.54617	2.89072	3.216	0.0517401	0
2000	1179	72.0331	0.988059	0.98947	195.665	-909656	28.2625	-228.72	2115.56	103.846	-8.542	0	2.54508	2.89024	3.226	0.0527601	0
2000	1178	71.1757	0.98822	0.989615	193.325	-898652	27.9385	-227.031	2095.9	102.554	-8.553	0	2.544	2.88976	3.237	0.0537846	0
2000	1177	70.3401	0.988378	0.989757	191.043	-887930	27.6226	-225.381	2076.74	101.295	-8.565	0	2.54292	2.88927	3.248	0.0548135	0
2000	1176	69.5254	0.988532	0.989895	188.819	-877478	27.3145	-223.769	2058.06	100.068	-8.576	0	2.54185	2.88878	3.258	0.0558467	0
2000	1175	68.7308	0.988416	0.989814	186.646	-867288	27.0136	-222.166	2039.57	98.8672	-8.588	0	2.5407	2.89366	3.269	0.056906	0
2000	1174	67.9373	0.988438	0.989832	184.48	-857154	26.7141	-220.577	2021.24	97.6731	-8.6	0	2.53955	2.89158	3.28	0.0579823	0
2000	1173	67.1546	0.98859	0.989968	182.345	-847155	26.4186	-219.02	2003.29	96.4976	-8.611	0	2.5384	2.89109	3.291	0.0590631	0
2000	1172	66.3911	0.988738	0.990101	180.262	-837403	26.1304	-217.498	1985.77	95.3511	-8.623	0	2.53726	2.89061	3.301	0.0601481	0
2000	1171	65.6461	0.988882	0.99023	178.229	-827889	25.8491	-216.011	1968.67	94.2328	-8.635	0	2.53613	2.89012	3.312	0.0612373	0
2000	1170	64.919	0.989022	0.990356	176.245	-818605	25.5745	-214.556	1951.99	93.1416	-8.646	0	2.53501	2.88963	3.323	0.0623307	0
2000	1169	64.2091	0.989159	0.99048	174.307	-809543	25.3063	-213.132	1935.69	92.0764	-8.658	0	2.53389	2.88914	3.333	0.0634282	0
2000	1168	63.5157	0.989293	0.9906	172.414	-800693	25.0444	-211.739	1919.78	91.0364	-8.67	0	2.53278	2.88865	3.344	0.0645296	0
2000	1167	62.8384	0.989424	0.990717	170.565	-792050	24.7884	-210.376	1904.23	90.0207	-8.682	0	2.53168	2.88815	3.354	0.065635	0
2000	1166	62.1766	0.989551	0.990831	168.757	-783605	24.5383	-209.041	1889.03	89.0284	-8.694	0	2.53059	2.88766	3.364	0.0667443	0
2000	1165	61.5297	0.989676	0.990943	166.99	-775353	24.2937	-207.733	1874.17	88.0587	-8.705	0	2.5295	2.88716	3.375	0.0678573	0
2000	1164	60.8973	0.989797	0.991052	165.262	-767285	24.0546	-206.452	1859.65	87.111	-8.717	0	2.52842	2.88666	3.385	0.0689741	0
2000	1163	60.2787	0.989916	0.991159	163.572	-759397	23.8207	-205.197	1845.44	86.1843	-8.729	0	2.52735	2.88616	3.395	0.0700946	0
2000	1162	59.6737	0.990033	0.991263	161.919	-751682	23.5918	-203.966	1831.54	85.2781	-8.741	0	2.52628	2.88566	3.405	0.0712187	0
2000	1161	59.0817	0.990146	0.991365	160.301	-744135	23.3678	-202.76	1817.93	84.3916	-8.753	0	2.52523	2.88516	3.415	0.0723463	0
2000	1160	58.5023	0.990257	0.991464	158.717	-736749	23.1486	-201.577	1804.62	83.5242	-8.765	0	2.52417	2.88466	3.425	0.0734775	0
2000	1159	57.9351	0.990366	0.991562	157.166	-729521	22.9339	-200.417	1791.58	82.6753	-8.777	0	2.52313	2.88415	3.435	0.0746121	0
2000	1158	57.3798	0.990472	0.991657	155.647	-722444	22.7237	-199.278	1778.81	81.8444	-8.789	0	2.52209	2.88365	3.445	0.0757501	0
2000	1157	56.8358	0.990576	0.99175	154.159	-715514	22.5177	-198.161	1766.31	81.0307	-8.8	0	2.52106	2.88314	3.455	0.0768915	0
2000	1156	56.303	0.990678	0.991841	152.701	-708726	22.3159	-197.064	1754.06	80.2339	-8.812	0	2.52004	2.88264	3.464	0.0780361	0
2000	1155	55.781	0.990777	0.99193	151.273	-702077	22.1182	-195.987	1742.05	79.4533	-8.824	0	2.51902	2.88213	3.474	0.0791841	0
2000	1154	55.2693	0.990874	0.992017	149.873	-695561	21.9243	-194.929	1730.28	78.6885	-8.836	0	2.51801	2.88162	3.484	0.0803352	0
2000	1153	54.7678	0.99097	0.992102	148.5	-689175	21.7343	-193.891	1718.74	77.939	-8.848	0	2.517	2.88112	3.493	0.0814895	0
2000	1152	54.276	0.991063	0.992186	147.154	-682914	21.5479	-192.87	1707.43	77.2044	-8.86	0	2.516	2.88061	3.503	0.0826469	0
2000	1151	53.7938	0.991155	0.992267	145.833	-676776	21.3651	-191.867	1696.33	76.4841	-8.872	0	2.51501	2.8801	3.513	0.0838074	0
2000	1150	53.3208	0.991244	0.992347	144.538	-670756	21.1857	-190.881	1685.44	75.7778	-8.885	0	2.51403	2.87959	3.522	0.084971	0
2000	1149	52.8568	0.991332	0.992426	143.267	-664851	21.0098	-189.912	1674.76	75.0851	-8.897	0	2.51305	2.87908	3.531	0.0861375	0
2000	1148	52.4015	0.991418	0.992503	142.02	-659058	20.837	-188.959	1664.28	74.4055	-8.909	0	2.51208	2.87858	3.541	0.087307	0
2000	1147	51.9546	0.991503	0.992578	140.795	-653374	20.6675	-188.022	1653.98	73.7388	-8.921	0	2.51111	2.87807	3.55	0.0884795	0
2000	1146	51.5159	0.991585	0.992652	139.593	-647794	20.501	-187.1	1643.88	73.0845	-8.933	0	2.51015	2.87756	3.559	0.0896548	0
2000	1145	51.0853	0.991666	0.992724	138.413	-642317	20.3376	-186.194	1633.96	72.4422	-8.945	0	2.50919	2.87705	3.569	0.0908329	0
2000	1144	50.6624	0.991746	0.992795	137.253	-636940	20.177	-185.301	1624.22	71.8117	-8.957	0	2.50825	2.87654	3.578	0.0920139	0
2000	1143	50.2471	0.991824	0.992864	136.115	-631660	20.0193	-184.423	1614.65	71.1927	-8.969	0	2.5073	2.87604	3.587	0.0931977	0
2000	1142	49.8391	0.9919	0.992933	134.996	-626473	19.8643	-183.558	1605.24	70.5847	-8.982	0	2.50637	2.87553	3.596	0.0943842	0
2000	1141	49.4382	0.991975	0.992999	133.896	-621379	19.712	-182.707	1596	69.9875	-8.994	0	2.50543	2.87502	3.605	0.0955734	0
2000	1140	49.0443	0.992049	0.993065	132.816	-616373	19.5624	-181.869	1586.92	69.4009	-9.006	0	2.50451	2.87452	3.614	0.0967653	0
2000	1139	48.6572	0.992121	0.993129	131.754	-611454	19.4153	-181.044	1577.99	68.8245	-9.018	0	2.50359	2.87401	3.623	0.0979599	0
2000	1138	48.2767	0.992192	0.993193	130.709	-606620	19.2706	-180.231	1569.22	68.258	-9.031	0	2.50267	2.87351	3.632	0.0991571	0
2000	1137	47.9026	0.992261	0.993254	129.683	-601868	19.1284	-179.43	1560.59	67.7013	-9.043	0	2.50177	2.873	3.641	0.100357	0
2000	1136	47.5347	0.99233	0.993315	128.673	-597196	18.9885	-178.64	1552.1	67.154	-9.055	0	2.50086	2.8725	3.649	0.101559	0
2000	1135	47.173	0.992397	0.993375	127.68	-592602	18.8509	-177.862	1543.75	66.6159	-9.067	0	2.49997	2.872	3.658	0.102764	0
2000	1134	46.8172	0.992462	0.993434	126.702	-588085	18.7155	-177.096	1535.54	66.0868	-9.08	0	2.49907	2.8715	3.667	0.103972	0
2000	1133	46.4671	0.992527	0.993491	125.741	-583641	18.5823	-176.34	1527.45	65.5664	-9.092	0	2.49819	2.871	3.675	0.105181	0
2000	1132	46.1228	0.992591	0.993548	124.795	-579270	18.4512	-175.595	1519.5	65.0546	-9.105	0	2.49731	2.8705	3.684	0.106394	0
2000	1131	45.7839	0.992653	0.993603	123.864	-574969	18.3222	-174.86	1511.67	64.551	-9.117	0	2.49643	2.87	3.693	0.107609	0
2000	1130	45.4504	0.992714	0.993658	122.948	-570737	18.1952	-174.135	1503.97	64.0556	-9.129	0	2.49556	2.8695	3.701	0.108826	0
2000	1129	45.1221	0.992775	0.993711	122.045	-566572	18.0702	-173.42	1496.38	63.5681	-9.142	0	2.49469	2.86901	3.71	0.110046	0
2000	1128	44.799	0.992834	0.993764	121.157	-562472	17.9471	-172.715	1488.92	63.0883	-9.154	0	2.49383	2.86851	3.718	0.111268	0
2000	1127	44.4808	0.992892	0.993816	120.282	-558436	17.8258	-172.019	1481.56	62.616	-9.167	0	2.49298	2.86802	3.726	0.112492	0
2000	1126	44.1675	0.992949	0.993866	119.421	-554463	17.7064	-171.332	1474.32	62.1511	-9.179	0	2.49213	2.86753	3.735	0.113719	0
2000	1125	43.859	0.993005	0.993916	118.572	-550551	17.5888	-170.655	1467.18	61.6933	-9.192	0	2.49128	2.86704	3.743	0.114948	0
2000	1124	43.5551	0.993061	0.993966	117.736	-546697	17.473	-169.986	1460.15	61.2426	-9.204	0	2.49044	2.86655	3.751	0.116179	0
2000	1123	43.2557	0.993115	0.994014	116.913	-542902	17.3588	-169.326	1453.22	60.7987	-9.217	0	2.48961	2.86607	3.759	0.117413	0
2000	1122	42.9608	0.993168	0.994061	116.101	-539164	17.2463	-168.674	1446.4	60.3615	-9.229	0	2.48878	2.86558	3.768	0.118648	0
2000	1121	42.6701	0.993221	0.994108	115.302	-535481	17.1354	-168.03	1439.67	59.9308	-9.242	0	2.48795	2.8651	3.776	0.119887	0
2000	1120	42.3838	0.993273	0.994154	114.513	-531852	17.0261	-167.394	1433.04	59.5065	-9.254	0	2.48713	2.86462	3.784	0.121127	0
2000	1119	42.1015	0.993324	0.994199	113.736	-528276	16.9184	-166.766	1426.5	59.0884	-9.267	0	2.48631	2.86414	3.792	0.122369	0
2000	1118	41.8233	0.993374	0.994244	112.97	-524752	16.8122	-166.146	1420.06	58.6764	-9.28	0	2.4855	2.86367	3.8	0.123614	0
2000	1117	41.5491	0.993423	0.994287	112.215	-521278	16.7075	-165.533	1413.7	58.2704	-9.292	0	2.48469	2.86319	3.808	0.124861	0
2000	1116	41.2787	0.993471	0.99433	111.47	-517854	16.6042	-164.928	1407.44	57.8702	-9.305	0	2.48389	2.86272	3.816	0.12611	0
2000	1115	41.0121	0.993519	0.994373	110.736	-514478	16.5023	-164.33	1401.26	57.4757	-9.318	0	2.4831	2.86225	3.824	0.127361	0
2000	1114	40.7492	0.993566	0.994414	110.012	-511149	16.4019	-163.739	1395.16	57.0868	-9.33	0	2.4823	2.86178	3.831	0.128614	0
2000	1113	40.4899	0.993612	0.994455	109.297	-507867	16.3028	-163.155	1389.15	56.7033	-9.343	0	2.48151	2.86131	3.839	0.129869	0
2000	1112	40.2341	0.993658	0.994496	108.592	-504630	16.205	-162.577	1383.21	56.3251	-9.356	0	2.48073	2.86085	3.847	0.131127	0
2000	1111	39.9819	0.993702	0.994535	107.897	-501437	16.1086	-162.006	1377.36	55.9522	-9.368	0	2.47995	2.86039	3.855	0.132386	0
2000	1110	39.733	0.993747	0.994575	107.211	-498288	16.0134	-161.442	1371.58	55.5844	-9.381	0	2.47917	2.85993	3.862	0.133648	0
2000	1109	39.4874	0.99379	0.994613	106.533	-495181	15.9194	-160.884	1365.88	55.2216	-9.394	0	2.4784	2.85948	3.87	0.134911	0
2000	1108	39.2451	0.993833	0.994651	105.865	-492115	15.8267	-160.332	1360.25	54.8637	-9.407	0	2.47763	2.85902	3.878	0.136177	0
2000	1107	39.0059	0.993875	0.994688	105.206	-489091	15.7352	-159.786	1354.69	54.5105	-9.42	0	2.47687	2.85857	3.885	0.137444	0
2000	1106	38.7699	0.993916	0.994725	104.555	-486106	15.6449	-159.246	1349.21	54.1621	-9.432	0	2.47611	2.85813	3.893	0.138714	0
2000	1105	38.537	0.993957	0.994761	103.912	-483160	15.5557	-158.712	1343.79	53.8183	-9.445	0	2.47536	2.85768	3.9	0.139985	0
2000	1104	38.307	0.993997	0.994797	103.277	-480252	15.4676	-158.184	1338.44	53.479	-9.458	0	2.4746	2.85724	3.908	0.141259	0
2000	1103	38.08	0.994037	0.994832	102.651	-477382	15.3806	-157.661	1333.16	53.1441	-9.471	0	2.47386	2.8568	3.915	0.142534	0
2000	1102	37.8558	0.994076	0.994867	102.032	-474549	15.2948	-157.144	1327.95	52.8135	-9.484	0	2.47311	2.85636	3.922	0.143812	0
2000	1101	37.6345	0.994115	0.994901	101.421	-471752	15.21	-156.632	1322.79	52.4871	-9.497	0	2.47238	2.85593	3.93	0.145091	0
2000	1100	37.4159	0.994153	0.994935	100.817	-468990	15.1262	-156.126	1317.7	52.1649	-9.51	0	2.47164	2.8555	3.937	0.146373	0
2000	1099	37.2	0.99419	0.994968	100.221	-466263	15.0434	-155.625	1312.68	51.8468	-9.523	0	2.47091	2.85507	3.944	0.147656	0
2000	1098	36.9868	0.994227	0.995001	99.6319	-463569	14.9617	-155.129	1307.71	51.5327	-9.536	0	2.47018	2.85465	3.951	0.148941	0
2000	1097	36.7762	0.994263	0.995033	99.0501	-460909	14.8809	-154.637	1302.8	51.2225	-9.549	0	2.46946	2.85423	3.959	0.150228	0
2000	1096	36.5681	0.994299	0.995065	98.4752	-458281	14.8011	-154.151	1297.95	50.9161	-9.562	0	2.46874	2.85381	3.966	0.151517	0
2000	1095	36.3626	0.994335	0.995096	97.9071	-455686	14.7222	-153.67	1293.16	50.6135	-9.575	0	2.46802	2.8534	3.973	0.152808	0
2000	1094	36.1595	0.994369	0.995127	97.3458	-453122	14.6443	-153.193	1288.42	50.3146	-9.588	0	2.46731	2.85299	3.98	0.1541	0
2000	1093	35.9588	0.994404	0.995157	96.791	-450588	14.5672	-152.721	1283.74	50.0193	-9.601	0	2.4666	2.85258	3.987	0.155395	0
2000	1092	35.7605	0.994438	0.995187	96.2427	-448085	14.4911	-152.254	1279.11	49.7276	-9.614	0	2.4659	2.85218	3.994	0.156691	0
2000	1091	35.5645	0.994471	0.995217	95.7007	-445612	14.4158	-151.791	1274.53	49.4394	-9.627	0	2.4652	2.85178	4.001	0.157989	0
2000	1090	35.3708	0.994504	0.995246	95.165	-443168	14.3414	-151.332	1270	49.1545	-9.64	0	2.4645	2.85138	4.008	0.159289	0
2000	1089	35.1793	0.994536	0.995275	94.6354	-440752	14.2679	-150.878	1265.53	48.8731	-9.654	0	2.4638	2.85099	4.015	0.160591	0
2000	1088	34.99	0.994568	0.995303	94.1117	-438364	14.1951	-150.428	1261.1	48.5949	-9.667	0	2.46311	2.8506	4.022	0.161894	0
2000	1087	34.8029	0.9946	0.995331	93.5939	-436004	14.1232	-149.982	1256.73	48.32	-9.68	0	2.46243	2.85022	4.028	0.1632	0
2000	1086	34.6179	0.994631	0.995359	93.082	-433671	14.0521	-149.541	1252.4	48.0483	-9.693	0	2.46174	2.84984	4.035	0.164507	0
2000	1085	34.4349	0.994662	0.995386	92.5757	-431365	13.9817	-149.103	1248.12	47.7797	-9.706	0	2.46106	2.84946	4.042	0.165816	0
2000	1084	34.254	0.994692	0.995413	92.0749	-429084	13.9122	-148.669	1243.88	47.5141	-9.72	0	2.46038	2.84909	4.049	0.167126	0
2000	1083	34.0752	0.994722	0.99544	91.5797	-426829	13.8434	-148.239	1239.69	47.2516	-9.733	0	2.45971	2.84872	4.055	0.168439	0
2000	1082	33.8982	0.994752	0.995466	91.0899	-424600	13.7753	-147.813	1235.55	46.992	-9.746	0	2.45904	2.84836	4.062	0.169753	0
2000	1081	33.7233	0.994781	0.995492	90.6053	-422395	13.7079	-147.391	1231.44	46.7353	-9.76	0	2.45837	2.848	4.069	0.171069	0
2000	1080	33.5502	0.99481	0.995517	90.1259	-420214	13.6413	-146.973	1227.39	46.4815	-9.773	0	2.4577	2.84764	4.075	0.172387	0
2000	1079	33.379	0.994838	0.995543	89.6517	-418058	13.5754	-146.558	1223.37	46.2305	-9.786	0	2.45704	2.84729	4.082	0.173706	0
2000	1078	33.2096	0.994866	0.995568	89.1824	-415924	13.5102	-146.147	1219.4	45.9823	-9.8	0	2.45638	2.84694	4.088	0.175027	0
2000	1077	33.0421	0.994894	0.995592	88.7181	-413814	13.4457	-145.739	1215.46	45.7367	-9.813	0	2.45573	2.8466	4.095	0.17635	0
2000	1076	32.8763	0.994921	0.995616	88.2587	-411727	13.3818	-145.334	1211.57	45.4938	-9.827	0	2.45508	2.84626	4.101	0.177675	0
2000	1075	32.7122	0.994948	0.99564	87.804	-409662	13.3186	-144.934	1207.71	45.2536	-9.84	0	2.45443	2.84592	4.108	0.179001	0
2000	1074	32.5499	0.994975	0.995664	87.3541	-407619	13.256	-144.536	1203.9	45.0159	-9.853	0	2.45378	2.84559	4.114	0.180329	0
2000	1073	32.3893	0.994994	0.995683	86.9086	-405597	13.1941	-144.141	1200.11	44.7806	-9.867	0	2.45313	2.84646	4.121	0.18166	0
2000	1072	32.2302	0.995	0.995694	86.4675	-403596	13.1328	-143.75	1196.35	44.5476	-9.88	0	2.45247	2.84968	4.127	0.182997	0
2000	1071	32.0727	0.995012	0.99571	86.0304	-401614	13.072	-143.361	1192.62	44.3167	-9.894	0	2.45182	2.85269	4.134	0.184336	0
2000	1070	31.9166	0.995025	0.995726	85.5976	-399651	13.0118	-142.976	1188.93	44.0883	-9.907	0	2.45117	2.85519	4.14	0.185677	0
2000	1069	31.7618	0.99505	0.995748	85.1683	-397707	12.9522	-142.593	1185.27	43.8618	-9.921	0	2.45052	2.85498	4.146	0.187019	0
2000	1068	31.6085	0.995074	0.99577	84.7433	-395782	12.8931	-142.214	1181.64	43.6377	-9.935	0	2.44987	2.85477	4.153	0.188363	0
2000	1067	31.4567	0.995098	0.995792	84.3224	-393877	12.8346	-141.838	1178.06	43.4159	-9.948	0	2.44922	2.85457	4.159	0.189708	0
2000	1066	31.3065	0.995122	0.995813	83.9058	-391992	12.7767	-141.464	1174.5	43.1964	-9.962	0	2.44858	2.85438	4.165	0.191055	0
2000	1065	31.1577	0.995146	0.995834	83.4932	-390125	12.7193	-141.094	1170.98	42.979	-9.975	0	2.44794	2.85419	4.172	0.192404	0
2000	1064	31.0104	0.995169	0.995855	83.0846	-388277	12.6625	-140.727	1167.49	42.7639	-9.989	0	2.4473	2.85401	4.178	0.193755	0
2000	1063	30.8646	0.995193	0.995876	82.6799	-386448	12.6063	-140.362	1164.03	42.5509	-10.003	0	2.44667	2.85383	4.184	0.195107	0
2000	1062	30.7201	0.995215	0.995896	82.2791	-384636	12.5506	-140	1160.61	42.3401	-10.016	0	2.44604	2.85366	4.19	0.196461	0
2000	1061	30.5771	0.995238	0.995916	81.8822	-382843	12.4954	-139.641	1157.22	42.1313	-10.03	0	2.44541	2.8535	4.196	0.197817	0
2000	1060	30.4354	0.99526	0.995936	81.489	-381067	12.4407	-139.284	1153.85	41.9246	-10.044	0	2.44478	2.85335	4.203	0.199174	0
2000	1059	30.2951	0.995282	0.995956	81.0995	-379308	12.3865	-138.931	1150.52	41.72	-10.058	0	2.44416	2.8532	4.209	0.200533	0
2000	1058	30.1561	0.995304	0.995975	80.7136	-377566	12.3329	-138.58	1147.22	41.5173	-10.071	0	2.44353	2.85306	4.215	0.201894	0
2000	1057	30.0185	0.995325	0.995994	80.3314	-375841	12.2797	-138.231	1143.95	41.3166	-10.085	0	2.44291	2.85292	4.221	0.203256	0
2000	1056	29.8821	0.995346	0.996013	79.9527	-374133	12.2271	-137.885	1140.71	41.1178	-10.099	0	2.4423	2.8528	4.227	0.20462	0
2000	1055	29.747	0.995367	0.996032	79.5774	-372440	12.1749	-137.542	1137.49	40.9209	-10.113	0	2.44168	2.85268	4.233	0.205986	0
2000	1054	29.6131	0.995388	0.99605	79.2056	-370764	12.1231	-137.201	1134.3	40.7258	-10.127	0	2.44107	2.85257	4.239	0.207353	0
2000	1053	29.4805	0.995408	0.996069	78.8371	-369103	12.0719	-136.862	1131.14	40.5327	-10.141	0	2.44045	2.85247	4.245	0.208722	0
2000	1052	29.349	0.995428	0.996087	78.472	-367458	12.0211	-136.526	1128.01	40.3413	-10.155	0	2.43984	2.85237	4.251	0.210092	0
2000	1051	29.2188	0.995448	0.996105	78.1102	-365829	11.9708	-136.192	1124.91	40.1517	-10.169	0	2.43924	2.85229	4.257	0.211464	0
2000	1050	29.0898	0.995468	0.996122	77.7515	-364214	11.9209	-135.861	1121.83	39.9639	-10.183	0	2.43863	2.85221	4.262	0.212838	0
2000	1049	28.9619	0.995487	0.99614	77.3961	-362614	11.8714	-135.532	1118.77	39.7778	-10.196	0	2.43803	2.85214	4.268	0.214213	0
2000	1048	28.8351	0.995506	0.996157	77.0438	-361029	11.8224	-135.205	1115.75	39.5934	-10.21	0	2.43743	2.85208	4.274	0.21559	0
2000	1047	28.7095	0.995525	0.996174	76.6946	-359458	11.7738	-134.881	1112.74	39.4107	-10.224	0	2.43683	2.85203	4.28	0.216969	0
2000	1046	28.5849	0.995544	0.996191	76.3484	-357901	11.7257	-134.558	1109.77	39.2297	-10.239	0	2.43623	2.85199	4.286	0.218349	0
2000	1045	28.4615	0.995562	0.996207	76.0052	-356358	11.6779	-134.238	1106.81	39.0502	-10.253	0	2.43563	2.85196	4.291	0.219731	0
2000	1044	28.3392	0.99558	0.996224	75.6649	-354829	11.6306	-133.92	1103.88	38.8724	-10.267	0	2.43504	2.85194	4.297	0.221115	0
2000	1043	28.2179	0.995598	0.99624	75.3276	-353314	11.5836	-133.604	1100.98	38.6962	-10.281	0	2.43445	2.85192	4.303	0.2225	0
2000	1042	28.0976	0.995616	0.996256	74.9931	-351812	11.5371	-133.291	1098.09	38.5215	-10.295	0	2.43385	2.85192	4.308	0.223887	0
2000	1041	27.9784	0.995633	0.996272	74.6614	-350323	11.4909	-132.979	1095.23	38.3484	-10.309	0	2.43327	2.85193	4.314	0.225276	0
2000	1040	27.8602	0.99565	0.996288	74.3326	-348847	11.4451	-132.669	1092.4	38.1768	-10.323	0	2.43268	2.85195	4.32	0.226666	0
2000	1039	27.7429	0.995668	0.996303	74.0064	-347384	11.3998	-132.362	1089.58	38.0066	-10.337	0	2.43209	2.85197	4.325	0.228058	0
2000	1038	27.6267	0.995684	0.996318	73.683	-345934	11.3547	-132.056	1086.79	37.838	-10.352	0	2.43151	2.85202	4.331	0.229451	0
2000	1037	27.5114	0.995701	0.996333	73.3622	-344496	11.3101	-131.752	1084.01	37.6708	-10.366	0	2.43092	2.85207	4.336	0.230846	0
2000	1036	27.3971	0.995717	0.996348	73.0441	-343070	11.2658	-131.451	1081.26	37.505	-10.38	0	2.43034	2.85213	4.342	0.232243	0
2000	1035	27.2837	0.995733	0.996363	72.7286	-341656	11.2219	-131.151	1078.53	37.3406	-10.394	0	2.42976	2.85221	4.347	0.233641	0
2000	1034	27.1713	0.995749	0.996378	72.4156	-340255	11.1783	-130.853	1075.82	37.1776	-10.409	0	2.42918	2.85229	4.353	0.235041	0
2000	1033	27.0598	0.995765	0.996392	72.1051	-338865	11.1351	-130.557	1073.13	37.016	-10.423	0	2.4286	2.85239	4.358	0.236443	0
2000	1032	26.9491	0.995781	0.996406	71.7971	-337487	11.0922	-130.262	1070.46	36.8557	-10.437	0	2.42802	2.85251	4.364	0.237846	0
2000	1031	26.8394	0.995796	0.99642	71.4915	-336120	11.0497	-129.97	1067.81	36.6968	-10.452	0	2.42745	2.85263	4.369	0.239251	0
2000	1030	26.7305	0.995811	0.996434	71.1884	-334764	11.0075	-129.679	1065.18	36.5391	-10.466	0	2.42687	2.85277	4.375	0.240658	0
2000	1029	26.6225	0.995826	0.996448	70.8876	-333420	10.9656	-129.39	1062.57	36.3828	-10.48	0	2.4263	2.85293	4.38	0.242067	0
2000	1028	26.5153	0.995841	0.996461	70.5892	-332086	10.9241	-129.103	1059.98	36.2277	-10.495	0	2.42573	2.85309	4.385	0.243477	0
2000	1027	26.409	0.995855	0.996475	70.2931	-330764	10.8829	-128.818	1057.4	36.0738	-10.509	0	2.42515	2.85328	4.391	0.244888	0
2000	1026	26.3035	0.995869	0.996488	69.9992	-329452	10.842	-128.534	1054.84	35.9212	-10.524	0	2.42458	2.85347	4.396	0.246302	0
2000	1025	26.1988	0.995883	0.996501	69.7076	-328150	10.8014	-128.252	1052.3	35.7698	-10.538	0	2.42401	2.85368	4.401	0.247717	0
2000	1024	26.095	0.995897	0.996514	69.4183	-326859	10.7611	-127.971	1049.78	35.6197	-10.553	0	2.42344	2.85391	4.407	0.249134	0
2000	1023	25.9919	0.995911	0.996527	69.1311	-325578	10.7211	-127.693	1047.29	35.4712	-10.567	0	2.42287	2.85415	4.412	0.250553	0
2000	1022	25.8896	0.995924	0.996539	68.846	-324308	10.6814	-127.415	1044.81	35.3234	-10.582	0	2.4223	2.85441	4.417	0.251973	0
2000	1021	25.788	0.995938	0.996552	68.5631	-323047	10.642	-127.14	1042.33	35.1767	-10.596	0	2.42173	2.85468	4.422	0.253395	0
2000	1020	25.6872	0.99595	0.996564	68.2822	-321796	10.6029	-126.866	1039.88	35.0311	-10.611	0	2.42116	2.85496	4.428	0.254819	0
2000	1019	25.5872	0.995963	0.996576	68.0034	-320554	10.5641	-126.593	1037.44	34.8867	-10.626	0	2.4206	2.85527	4.433	0.256245	0
2000	1018	25.4879	0.995976	0.996588	67.7267	-319323	10.5256	-126.322	1035.02	34.7433	-10.64	0	2.42003	2.85559	4.438	0.257673	0
2000	1017	25.3893	0.995988	0.996599	67.4519	-318100	10.4873	-126.053	1032.61	34.601	-10.655	0	2.41946	2.85593	4.443	0.259102	0
2000	1016	25.2914	0.996	0.996611	67.1791	-316887	10.4494	-125.785	1030.22	34.4598	-10.67	0	2.41889	2.85629	4.448	0.260533	0
2000	1015	25.1942	0.996012	0.996622	66.9083	-315683	10.4117	-125.518	1027.84	34.3196	-10.684	0	2.41833	2.85666	4.453	0.261966	0
2000	1014	25.0977	0.996024	0.996633	66.6393	-314488	10.3742	-125.253	1025.47	34.1805	-10.699	0	2.41776	2.85705	4.459	0.263401	0
2000	1013	25.0019	0.996036	0.996644	66.3723	-313302	10.337	-124.989	1023.13	34.0424	-10.714	0	2.41719	2.85746	4.464	0.264838	0
2000	1012	24.9068	0.996047	0.996655	66.1071	-312125	10.3001	-124.727	1020.79	33.9053	-10.729	0	2.41662	2.85789	4.469	0.266277	0
2000	1011	24.8123	0.996058	0.996666	65.8437	-310956	10.2635	-124.466	1018.47	33.7692	-10.744	0	2.41606	2.85834	4.474	0.267717	0
2000	1010	24.7185	0.996069	0.996677	65.5822	-309797	10.2271	-124.207	1016.16	33.634	-10.758	0	2.41549	2.85881	4.479	0.26916	0
2000	1009	24.6253	0.99608	0.996687	65.3224	-308645	10.1909	-123.949	1013.87	33.4999	-10.773	0	2.41492	2.8593	4.484	0.270604	0
2000	1008	24.5327	0.996091	0.996697	65.0644	-307502	10.155	-123.692	1011.59	33.3666	-10.788	0	2.41435	2.85981	4.489	0.27205	0
2000	1007	24.4408	0.996101	0.996708	64.8082	-306367	10.1194	-123.437	1009.32	33.2343	-10.803	0	2.41378	2.86033	4.494	0.273499	0
2000	1006	24.3495	0.996111	0.996718	64.5536	-305240	10.084	-123.182	1007.07	33.103	-10.818	0	2.41321	2.86088	4.499	0.274949	0
2000	1005	24.2588	0.996121	0.996728	64.3008	-304121	10.0488	-122.93	1004.83	32.9725	-10.833	0	2.41263	2.86145	4.504	0.276401	0
2000	1004	24.1687	0.996131	0.996737	64.0495	-303010	10.0138	-122.678	1002.6	32.8429	-10.848	0	2.41206	2.86205	4.509	0.277855	0
2000	1003	24.0791	0.99614	0.996747	63.8	-301907	9.97911	-122.428	1000.38	32.7142	-10.863	0	2.41149	2.86266	4.514	0.279311	0
2000	1002	23.9902	0.99615	0.996756	63.552	-300812	9.94462	-122.179	998.178	32.5864	-10.878	0	2.41091	2.8633	4.519	0.280769	0
2000	1001	23.9018	0.996159	0.996765	63.3057	-299724	9.91035	-121.931	995.984	32.4595	-10.893	0	2.41033	2.86396	4.524	0.282229	0
2000	1000	23.814	0.996168	0.996775	63.0609	-298643	9.87631	-121.684	993.802	32.3334	-10.908	0	2.40976	2.86464	4.529	0.283691	0
2000	999	23.7267	0.996177	0.996784	62.8176	-297571	9.84248	-121.439	991.63	32.2081	-10.923	0	2.40918	2.86536	4.534	0.285156	0
2000	998	23.64	0.996185	0.996792	62.5759	-296505	9.80887	-121.195	989.47	32.0836	-10.938	0	2.4086	2.8661	4.539	0.286622	0
2000	997	23.5538	0.996194	0.996801	62.3357	-295446	9.77548	-120.952	987.32	31.96	-10.953	0	2.40801	2.86687	4.544	0.28809	0
2000	996	23.4682	0.996202	0.996809	62.0969	-294395	9.74229	-120.71	985.181	31.8371	-10.968	0	2.40743	2.86769	4.549	0.289561	0
2000	995	23.383	0.996209	0.996818	61.8596	-293351	9.70931	-120.47	983.052	31.715	-10.984	0	2.40684	2.86855	4.554	0.291033	0
2000	994	23.2984	0.996217	0.996826	61.6237	-292313	9.67653	-120.23	980.932	31.5937	-10.999	0	2.40625	2.86946	4.558	0.292508	0
2000	993	23.2143	0.996224	0.996833	61.3892	-291282	9.64395	-119.992	978.822	31.4731	-11.014	0	2.40566	2.87044	4.563	0.293985	0
2000	992	23.1306	0.99623	0.996841	61.1561	-290258	9.61156	-119.754	976.72	31.3532	-11.029	0	2.40507	2.87151	4.568	0.295465	0
2000	991	23.0474	0.996236	0.996848	60.9243	-289241	9.57936	-119.518	974.627	31.2341	-11.045	0	2.40447	2.87272	4.573	0.296947	0
2000	990	22.9647	0.996241	0.996854	60.6937	-288230	9.54736	-119.283	972.541	31.1156	-11.06	0	2.40386	2.87415	4.578	0.298432	0
2000	989	22.8823	0.996243	0.996859	60.4643	-287224	9.51552	-119.048	970.46	30.9978	-11.075	0	2.40325	2.87596	4.583	0.29992	0
2000	988	22.8004	0.996242	0.996862	60.2361	-286225	9.48386	-118.815	968.381	30.8805	-11.091	0	2.40263	2.87853	4.588	0.301412	0
2000	987	22.7188	0.996232	0.996858	60.0086	-285231	9.45234	-118.583	966.296	30.7636	-11.106	0	2.40199	2.88302	4.593	0.30291	0
2000	986	22.6371	0.996429	0.996983	59.7829	-284237	9.42086	-118.354	964.362	30.6484	-11.121	0	2.40153	2.8437	4.597	0.304367	0
2000	985	22.5595	0.99586	0.996632	59.5612	-283288	9.3906	-118.117	961.992	30.5328	-11.137	0	2.40048	2.95328	4.604	0.305968	0
2000	984	22.4704	0.995632	0.996502	59.3146	-282252	9.35741	-117.876	959.398	30.4047	-11.152	0	2.39925	2.99885	4.612	0.307615	0
2000	983	22.3766	0.995654	0.99652	59.0589	-281187	9.32314	-117.636	956.787	30.2725	-11.168	0	2.39803	2.99809	4.62	0.309261	0
2000	982	22.2837	0.995675	0.996538	58.8055	-280132	9.28918	-117.397	954.201	30.1415	-11.183	0	2.39681	2.99734	4.628	0.310908	0
2000	981	22.1916	0.995696	0.996556	58.5544	-279086	9.25552	-117.159	951.638	30.0117	-11.199	0	2.3956	2.9966	4.636	0.312553	0
2000	980	22.1005	0.995717	0.996574	58.3056	-278050	9.22217	-116.923	949.099	29.8832	-11.214	0	2.39439	2.99587	4.644	0.314199	0
2000	979	22.0101	0.995737	0.996591	58.059	-277024	9.18911	-116.689	946.582	29.7559	-11.23	0	2.39319	2.99514	4.652	0.315843	0
2000	978	21.9207	0.995758	0.996608	57.8147	-276007	9.15634	-116.457	944.088	29.6298	-11.246	0	2.392	2.99443	4.659	0.317488	0
2000	977	21.832	0.995778	0.996625	57.5726	-274999	9.12386	-116.226	941.616	29.5049	-11.261	0	2.39081	2.99372	4.667	0.319132	0
2000	976	21.7441	0.995798	0.996642	57.3326	-274000	9.09166	-115.996	939.166	29.3811	-11.277	0	2.38963	2.99303	4.675	0.320775	0
2000	975	21.6571	0.995818	0.996659	57.0947	-273010	9.05974	-115.768	936.738	29.2584	-11.293	0	2.38846	2.99234	4.682	0.322418	0
2000	974	21.5708	0.995837	0.996675	56.859	-272030	9.0281	-115.541	934.331	29.1369	-11.308	0	2.38729	2.99167	4.69	0.324061	0
2000	973	21.4854	0.995856	0.996692	56.6253	-271058	8.99673	-115.316	931.945	29.0165	-11.324	0	2.38613	2.991	4.697	0.325703	0
2000	972	21.4006	0.995875	0.996708	56.3936	-270094	8.96562	-115.093	929.579	28.8972	-11.34	0	2.38497	2.99034	4.704	0.327344	0
2000	971	21.3167	0.995894	0.996724	56.1639	-269139	8.93478	-114.87	927.234	28.7789	-11.355	0	2.38382	2.98969	4.712	0.328986	0
2000	970	21.2335	0.995913	0.996739	55.9363	-268193	8.9042	-114.65	924.909	28.6618	-11.371	0	2.38268	2.98905	4.719	0.330626	0
2000	969	21.151	0.995931	0.996755	55.7106	-267254	8.87388	-114.43	922.603	28.5456	-11.387	0	2.38154	2.98841	4.726	0.332266	0
2000	968	21.0693	0.99595	0.99677	55.4868	-266324	8.84381	-114.212	920.317	28.4305	-11.403	0	2.38041	2.98779	4.734	0.333906	0
2000	967	20.9882	0.995968	0.996786	55.2649	-265402	8.81399	-113.995	918.05	28.3164	-11.419	0	2.37929	2.98717	4.741	0.335545	0
2000	966	20.9079	0.995986	0.996801	55.0449	-264488	8.78442	-113.78	915.802	28.2034	-11.435	0	2.37817	2.98656	4.748	0.337184	0
2000	965	20.8283	0.996004	0.996816	54.8267	-263582	8.75509	-113.566	913.572	28.0913	-11.451	0	2.37705	2.98596	4.755	0.338822	0
2000	964	20.7493	0.996021	0.996831	54.6104	-262683	8.726	-113.353	911.361	27.9802	-11.467	0	2.37594	2.98537	4.762	0.340459	0
2000	963	20.6711	0.996039	0.996846	54.3958	-261792	8.69715	-113.142	909.168	27.87	-11.483	0	2.37484	2.98478	4.769	0.342096	0
2000	962	20.5935	0.996056	0.99686	54.1831	-260908	8.66854	-112.932	906.992	27.7608	-11.499	0	2.37374	2.9842	4.776	0.343733	0
2000	961	20.5166	0.996073	0.996875	53.9721	-260032	8.64015	-112.723	904.834	27.6525	-11.515	0	2.37265	2.98363	4.783	0.345369	0
2000	960	20.4403	0.99609	0.996889	53.7628	-259164	8.612	-112.515	902.693	27.5452	-11.531	0	2.37156	2.98307	4.789	0.347005	0
2000	959	20.3646	0.996107	0.996903	53.5552	-258302	8.58406	-112.308	900.57	27.4388	-11.547	0	2.37048	2.98252	4.796	0.34864	0
2000	958	20.2896	0.996123	0.996917	53.3493	-257448	8.55635	-112.103	898.463	27.3332	-11.563	0	2.36941	2.98197	4.803	0.350274	0
2000	957	20.2153	0.99614	0.996931	53.1451	-256601	8.52886	-111.899	896.373	27.2286	-11.579	0	2.36834	2.98143	4.81	0.351908	0
2000	956	20.1415	0.996156	0.996945	52.9425	-255760	8.50159	-111.696	894.299	27.1248	-11.595	0	2.36727	2.9809	4.816	0.353541	0
2000	955	20.0684	0.996172	0.996958	52.7416	-254927	8.47453	-111.495	892.241	27.022	-11.611	0	2.36621	2.98037	4.823	0.355174	0
2000	954	19.9958	0.996188	0.996972	52.5423	-254100	8.44769	-111.294	890.199	26.9199	-11.628	0	2.36516	2.97986	4.829	0.356806	0
2000	953	19.9239	0.996204	0.996985	52.3445	-253280	8.42105	-111.095	888.172	26.8187	-11.644	0	2.3641	2.97935	4.836	0.358438	0
2000	952	19.8525	0.99622	0.996999	52.1483	-252467	8.39462	-110.897	886.162	26.7184	-11.66	0	2.36306	2.97884	4.842	0.360069	0
2000	951	19.7817	0.996235	0.997012	51.9536	-251660	8.36839	-110.7	884.166	26.6188	-11.676	0	2.36202	2.97835	4.849	0.361699	0
2000	950	19.7115	0.996251	0.997025	51.7605	-250860	8.34236	-110.504	882.186	26.5201	-11.693	0	2.36099	2.97785	4.855	0.363329	0
2000	949	19.6419	0.996266	0.997038	51.5689	-250066	8.31654	-110.309	880.22	26.4222	-11.709	0	2.35996	2.97737	4.861	0.364958	0
2000	948	19.5728	0.996281	0.997051	51.3787	-249278	8.29091	-110.115	878.269	26.3251	-11.725	0	2.35893	2.9769	4.868	0.366587	0
2000	947	19.5043	0.996296	0.997063	51.19	-248497	8.26547	-109.922	876.333	26.2287	-11.742	0	2.35791	2.97643	4.874	0.368215	0
2000	946	19.4363	0.996311	0.997076	51.0028	-247722	8.24022	-109.73	874.411	26.1331	-11.758	0	2.3569	2.97596	4.88	0.369842	0
2000	945	19.3688	0.996326	0.997089	50.817	-246953	8.21517	-109.54	872.502	26.0383	-11.775	0	2.35589	2.97551	4.886	0.371469	0
2000	944	19.3019	0.99634	0.997101	50.6327	-246190	8.1903	-109.35	870.608	25.9443	-11.791	0	2.35488	2.97506	4.892	0.373095	0
2000	943	19.2355	0.996355	0.997113	50.4497	-245432	8.16562	-109.162	868.728	25.851	-11.808	0	2.35388	2.97461	4.898	0.374721	0
2000	942	19.1697	0.996369	0.997125	50.2681	-244681	8.14112	-108.974	866.861	25.7584	-11.824	0	2.35289	2.97417	4.904	0.376346	0
2000	941	19.1043	0.996383	0.997138	50.0879	-243935	8.1168	-108.788	865.008	25.6665	-11.841	0	2.3519	2.97374	4.91	0.37797	0
2000	940	19.0395	0.996398	0.99715	49.909	-243196	8.09267	-108.602	863.167	25.5754	-11.857	0	2.35091	2.97332	4.916	0.379594	0
2000	939	18.9751	0.996412	0.997161	49.7315	-242462	8.06871	-108.417	861.34	25.485	-11.874	0	2.34993	2.9729	4.922	0.381217	0
2000	938	18.9113	0.996426	0.997173	49.5553	-241733	8.04492	-108.234	859.526	25.3953	-11.891	0	2.34895	2.97249	4.928	0.382839	0
2000	937	18.848	0.996439	0.997185	49.3803	-241010	8.02131	-108.051	857.724	25.3062	-11.907	0	2.34798	2.97208	4.934	0.38446	0
2000	936	18.7851	0.996453	0.997197	49.2067	-240292	7.99787	-107.869	855.935	25.2179	-11.924	0	2.34701	2.97168	4.94	0.386081	0
2000	935	18.7227	0.996467	0.997208	49.0344	-239580	7.97459	-107.689	854.159	25.1302	-11.941	0	2.34605	2.97128	4.945	0.387702	0
2000	934	18.6608	0.99648	0.99722	48.8633	-238874	7.95149	-107.509	852.394	25.0433	-11.958	0	2.34509	2.97089	4.951	0.389321	0
2000	933	18.5993	0.996494	0.997231	48.6935	-238172	7.92855	-107.33	850.642	24.9569	-11.974	0	2.34414	2.97051	4.957	0.39094	0
2000	932	18.5384	0.996507	0.997242	48.5249	-237476	7.90577	-107.152	848.902	24.8713	-11.991	0	2.34319	2.97013	4.962	0.392558	0
2000	931	18.4778	0.99652	0.997253	48.3575	-236785	7.88316	-106.975	847.174	24.7862	-12.008	0	2.34224	2.96976	4.968	0.394176	0
2000	930	18.4178	0.996533	0.997264	48.1913	-236099	7.8607	-106.799	845.457	24.7018	-12.025	0	2.3413	2.96939	4.973	0.395792	0
2000	929	18.3581	0.996546	0.997275	48.0263	-235418	7.83841	-106.624	843.752	24.6181	-12.042	0	2.34036	2.96903	4.979	0.397408	0
2000	928	18.299	0.996559	0.997286	47.8625	-234742	7.81627	-106.449	842.058	24.535	-12.059	0	2.33943	2.96867	4.984	0.399024	0
2000	927	18.2402	0.996572	0.997297	47.6999	-234071	7.79428	-106.276	840.376	24.4525	-12.076	0	2.3385	2.96832	4.99	0.400638	0
2000	926	18.1819	0.996584	0.997308	47.5384	-233405	7.77245	-106.103	838.704	24.3706	-12.093	0	2.33758	2.96797	4.995	0.402252	0
2000	925	18.124	0.996597	0.997319	47.3781	-232744	7.75077	-105.931	837.044	24.2893	-12.11	0	2.33666	2.96763	5	0.403865	0
2000	924	18.0666	0.996609	0.997329	47.2189	-232088	7.72925	-105.76	835.394	24.2086	-12.127	0	2.33575	2.9673	5.006	0.405477	0
2000	923	18.0096	0.996622	0.99734	47.0608	-231436	7.70787	-105.59	833.756	24.1285	-12.144	0	2.33483	2.96697	5.011	0.407089	0
2000	922	17.9529	0.996634	0.99735	46.9038	-230790	7.68663	-105.421	832.128	24.049	-12.161	0	2.33393	2.96664	5.016	0.4087	0
2000	921	17.8967	0.996646	0.997361	46.7479	-230147	7.66555	-105.252	830.51	23.97	-12.178	0	2.33303	2.96632	5.021	0.41031	0
2000	920	17.8409	0.996659	0.997371	46.5931	-229510	7.64461	-105.085	828.903	23.8917	-12.195	0	2.33213	2.966	5.026	0.411919	0
2000	919	17.7855	0.996671	0.997381	46.4393	-228877	7.62381	-104.918	827.306	23.8139	-12.212	0	2.33123	2.96569	5.031	0.413527	0
2000	918	17.7305	0.996683	0.997391	46.2867	-228248	7.60315	-104.752	825.719	23.7366	-12.23	0	2.33034	2.96538	5.036	0.415135	0
2000	917	17.6759	0.996695	0.997401	46.135	-227624	7.58263	-104.587	824.142	23.66	-12.247	0	2.32946	2.96508	5.041	0.416741	0
2000	916	17.6217	0.996706	0.997411	45.9844	-227004	7.56225	-104.422	822.575	23.5838	-12.264	0	2.32858	2.96478	5.046	0.418347	0
2000	915	17.5679	0.996718	0.997421	45.8349	-226389	7.542	-104.258	821.018	23.5082	-12.281	0	2.3277	2.96449	5.051	0.419952	0
2000	914	17.5145	0.99673	0.997431	45.6863	-225778	7.5219	-104.095	819.471	23.4332	-12.299	0	2.32683	2.9642	5.056	0.421557	0
2000	913	17.4614	0.996741	0.997441	45.5388	-225171	7.50192	-103.933	817.933	23.3587	-12.316	0	2.32596	2.96392	5.061	0.42316	0
2000	912	17.4087	0.996753	0.997451	45.3922	-224569	7.48208	-103.772	816.405	23.2847	-12.333	0	2.32509	2.96364	5.066	0.424763	0
2000	911	17.3564	0.996764	0.997461	45.2467	-223970	7.46237	-103.611	814.886	23.2112	-12.351	0	2.32423	2.96336	5.071	0.426365	0
2000	910	17.3044	0.996776	0.99747	45.1021	-223376	7.44279	-103.451	813.377	23.1383	-12.368	0	2.32337	2.96309	5.075	0.427966	0
2000	909	17.2528	0.996787	0.99748	44.9585	-222786	7.42334	-103.292	811.876	23.0658	-12.386	0	2.32252	2.96282	5.08	0.429566	0
2000	908	17.2016	0.996798	0.997489	44.8158	-222200	7.40402	-103.134	810.385	22.9939	-12.403	0	2.32167	2.96256	5.085	0.431165	0
2000	907	17.1507	0.996809	0.997499	44.6741	-221618	7.38483	-102.976	808.902	22.9225	-12.421	0	2.32082	2.9623	5.089	0.432763	0
2000	906	17.1002	0.996821	0.997508	44.5333	-221040	7.36576	-102.819	807.429	22.8515	-12.438	0	2.31998	2.96204	5.094	0.43436	0
2000	905	17.05	0.996832	0.997517	44.3935	-220466	7.34681	-102.663	805.964	22.7811	-12.456	0	2.31914	2.96179	5.098	0.435957	0
2000	904	17.0002	0.996843	0.997527	44.2545	-219896	7.32799	-102.507	804.508	22.7111	-12.474	0	2.31831	2.96154	5.103	0.437553	0
2000	903	16.9507	0.996853	0.997536	44.1165	-219330	7.30929	-102.352	803.061	22.6416	-12.491	0	2.31748	2.96129	5.107	0.439147	0
2000	902	16.9016	0.996864	0.997545	43.9794	-218768	7.29071	-102.198	801.622	22.5726	-12.509	0	2.31665	2.96105	5.112	0.440741	0
2000	901	16.8528	0.996875	0.997554	43.8432	-218209	7.27225	-102.044	800.191	22.5041	-12.527	0	2.31583	2.96082	5.116	0.442334	0
2000	900	16.8043	0.996886	0.997563	43.7079	-217654	7.25391	-101.892	798.769	22.436	-12.544	0	2.31501	2.96058	5.121	0.443926	0
Title:	R-magma	-	mresidual	from	MZ-magma	at	T	=	1145	C
Liquid	Composition:
Pressure	Temperature	mass	SiO2	TiO2	Al2O3	Fe2O3	Cr2O3	FeO	MnO	MgO	CaO	Na2O	K2O	H2O
2000	1400	99.9994	55.561	0.141801	17.5424	0.872668	0.00731448	4.91701	0.0727585	7.1692	9.88343	3.21948	0.106711	0.506188
2000	1400	99.9994	55.561	0.141801	17.5424	0.872668	0.00731448	4.91701	0.0727585	7.1692	9.88343	3.21948	0.106711	0.506188
2000	1399	99.9995	55.561	0.141801	17.5424	0.872769	0.00731448	4.91692	0.0727585	7.1692	9.88343	3.21948	0.106711	0.506188
2000	1398	99.9995	55.561	0.141801	17.5424	0.872871	0.00731448	4.91683	0.0727585	7.1692	9.88343	3.21948	0.106711	0.506188
2000	1397	99.9995	55.561	0.141801	17.5424	0.872974	0.00731448	4.91673	0.0727585	7.1692	9.88343	3.21948	0.106711	0.506188
2000	1396	99.9995	55.561	0.141801	17.5424	0.873078	0.00731448	4.91664	0.0727585	7.1692	9.88342	3.21948	0.106711	0.506188
2000	1395	99.9995	55.561	0.141801	17.5424	0.873183	0.00731448	4.91654	0.0727585	7.1692	9.88342	3.21948	0.106711	0.506188
2000	1394	99.9995	55.561	0.141801	17.5424	0.873289	0.00731448	4.91645	0.0727585	7.1692	9.88342	3.21948	0.106711	0.506188
2000	1393	99.9995	55.561	0.141801	17.5424	0.873397	0.00731448	4.91635	0.0727584	7.1692	9.88342	3.21947	0.106711	0.506188
2000	1392	99.9995	55.561	0.141801	17.5424	0.873505	0.00731448	4.91625	0.0727584	7.1692	9.88342	3.21947	0.106711	0.506188
2000	1391	99.9995	55.561	0.141801	17.5424	0.873614	0.00731448	4.91615	0.0727584	7.1692	9.88342	3.21947	0.106711	0.506188
2000	1390	99.9996	55.561	0.141801	17.5424	0.873725	0.00731448	4.91605	0.0727584	7.1692	9.88342	3.21947	0.106711	0.506187
2000	1389	99.9996	55.5609	0.141801	17.5424	0.873836	0.00731448	4.91595	0.0727584	7.1692	9.88342	3.21947	0.106711	0.506187
2000	1388	99.9996	55.5609	0.141801	17.5424	0.873949	0.00731447	4.91585	0.0727584	7.1692	9.88342	3.21947	0.106711	0.506187
2000	1387	99.9996	55.5609	0.141801	17.5424	0.874062	0.00731447	4.91575	0.0727584	7.16919	9.88342	3.21947	0.106711	0.506187
2000	1386	99.9996	55.5609	0.141801	17.5424	0.874177	0.00731447	4.91564	0.0727584	7.16919	9.88341	3.21947	0.106711	0.506187
2000	1385	99.9996	55.5609	0.141801	17.5424	0.874293	0.00731447	4.91554	0.0727584	7.16919	9.88341	3.21947	0.106711	0.506187
2000	1384	99.9996	55.5609	0.141801	17.5424	0.874409	0.00731447	4.91543	0.0727584	7.16919	9.88341	3.21947	0.106711	0.506187
2000	1383	99.9996	55.5609	0.141801	17.5424	0.874527	0.00731447	4.91533	0.0727584	7.16919	9.88341	3.21947	0.106711	0.506187
2000	1382	99.9996	55.5609	0.141801	17.5424	0.874646	0.00731447	4.91522	0.0727584	7.16919	9.88341	3.21947	0.106711	0.506187
2000	1381	99.9997	55.5609	0.141801	17.5424	0.874766	0.00731447	4.91511	0.0727583	7.16919	9.88341	3.21947	0.106711	0.506187
2000	1380	99.9997	55.5609	0.141801	17.5424	0.874887	0.00731447	4.915	0.0727583	7.16919	9.88341	3.21947	0.106711	0.506187
2000	1379	99.9997	55.5609	0.141801	17.5424	0.87501	0.00731447	4.91489	0.0727583	7.16919	9.88341	3.21947	0.106711	0.506187
2000	1378	99.9997	55.5609	0.141801	17.5424	0.875133	0.00731447	4.91478	0.0727583	7.16919	9.8834	3.21947	0.106711	0.506187
2000	1377	99.9997	55.5609	0.141801	17.5424	0.875257	0.00731447	4.91467	0.0727583	7.16919	9.8834	3.21947	0.106711	0.506187
2000	1376	99.9997	55.5609	0.141801	17.5424	0.875383	0.00731446	4.91455	0.0727583	7.16919	9.8834	3.21947	0.106711	0.506187
2000	1375	99.9997	55.5609	0.141801	17.5424	0.87551	0.00731446	4.91444	0.0727583	7.16918	9.8834	3.21947	0.106711	0.506187
2000	1374	99.9997	55.5608	0.141801	17.5424	0.875637	0.00731446	4.91432	0.0727583	7.16918	9.8834	3.21947	0.106711	0.506187
2000	1373	99.9998	55.5608	0.141801	17.5424	0.875766	0.00731446	4.9142	0.0727583	7.16918	9.8834	3.21947	0.106711	0.506186
2000	1372	99.9998	55.5608	0.141801	17.5424	0.875896	0.00731446	4.91409	0.0727583	7.16918	9.8834	3.21947	0.106711	0.506186
2000	1371	99.9998	55.5608	0.141801	17.5424	0.876027	0.00731446	4.91397	0.0727583	7.16918	9.8834	3.21947	0.106711	0.506186
2000	1370	99.9998	55.5608	0.141801	17.5424	0.876159	0.00731446	4.91385	0.0727582	7.16918	9.88339	3.21947	0.106711	0.506186
2000	1369	99.9998	55.5608	0.141801	17.5424	0.876292	0.00731446	4.91373	0.0727582	7.16918	9.88339	3.21947	0.106711	0.506186
2000	1368	99.9998	55.5608	0.141801	17.5424	0.876427	0.00731446	4.91361	0.0727582	7.16918	9.88339	3.21946	0.106711	0.506186
2000	1367	99.9998	55.5608	0.141801	17.5424	0.876562	0.00731446	4.91348	0.0727582	7.16918	9.88339	3.21946	0.106711	0.506186
2000	1366	99.9999	55.5608	0.141801	17.5424	0.876699	0.00731445	4.91336	0.0727582	7.16918	9.88339	3.21946	0.106711	0.506186
2000	1365	99.9999	55.5608	0.141801	17.5424	0.876837	0.00731445	4.91324	0.0727582	7.16917	9.88339	3.21946	0.106711	0.506186
2000	1364	99.9999	55.5608	0.141801	17.5424	0.876976	0.00731445	4.91311	0.0727582	7.16917	9.88339	3.21946	0.106711	0.506186
2000	1363	99.9999	55.5608	0.141801	17.5423	0.877116	0.00731445	4.91298	0.0727582	7.16917	9.88338	3.21946	0.106711	0.506186
2000	1362	99.9999	55.5608	0.141801	17.5423	0.877257	0.00731445	4.91285	0.0727582	7.16917	9.88338	3.21946	0.106711	0.506186
2000	1361	99.9999	55.5607	0.141801	17.5423	0.877399	0.00731445	4.91273	0.0727582	7.16917	9.88338	3.21946	0.106711	0.506186
2000	1360	99.9999	55.5607	0.141801	17.5423	0.877543	0.00731445	4.9126	0.0727581	7.16917	9.88338	3.21946	0.106711	0.506186
2000	1359	99.9999	55.5607	0.141801	17.5423	0.877687	0.00731445	4.91246	0.0727581	7.16917	9.88338	3.21946	0.106711	0.506185
2000	1358	100	55.5607	0.141801	17.5423	0.877833	0.00731445	4.91233	0.0727581	7.16917	9.88338	3.21946	0.106711	0.506185
2000	1357	100	55.5607	0.141801	17.5423	0.87798	0.00731445	4.9122	0.0727581	7.16917	9.88338	3.21946	0.106711	0.506185
2000	1356	100	55.5607	0.141801	17.5423	0.878128	0.00731444	4.91207	0.0727581	7.16917	9.88337	3.21946	0.106711	0.506185
2000	1355	100	55.5607	0.141801	17.5423	0.878277	0.00731444	4.91193	0.0727581	7.16916	9.88337	3.21946	0.106711	0.506185
2000	1354	100	55.5607	0.141801	17.5423	0.878428	0.00731444	4.91179	0.0727581	7.16916	9.88337	3.21946	0.106711	0.506185
2000	1353	100	55.5607	0.141801	17.5423	0.878579	0.00731444	4.91166	0.0727581	7.16916	9.88337	3.21946	0.106711	0.506185
2000	1352	100	55.5607	0.1418	17.5423	0.878732	0.00731444	4.91152	0.0727581	7.16916	9.88337	3.21946	0.106711	0.506185
2000	1351	100	55.5607	0.1418	17.5423	0.878886	0.00731444	4.91138	0.072758	7.16916	9.88337	3.21946	0.106711	0.506185
2000	1350	100	55.5607	0.1418	17.5423	0.879041	0.00731444	4.91124	0.072758	7.16916	9.88337	3.21946	0.106711	0.506185
2000	1349	100	55.5606	0.1418	17.5423	0.879198	0.00731444	4.9111	0.072758	7.16916	9.88336	3.21946	0.106711	0.506185
2000	1348	100	55.5606	0.1418	17.5423	0.879355	0.00731444	4.91095	0.072758	7.16916	9.88336	3.21946	0.106711	0.506185
2000	1347	100	55.5606	0.1418	17.5423	0.879514	0.00731443	4.91081	0.072758	7.16916	9.88336	3.21945	0.106711	0.506185
2000	1346	100	55.5606	0.1418	17.5423	0.879673	0.00731443	4.91067	0.072758	7.16915	9.88336	3.21945	0.106711	0.506184
2000	1345	100	55.5606	0.1418	17.5423	0.879835	0.00731443	4.91052	0.072758	7.16915	9.88336	3.21945	0.106711	0.506184
2000	1344	100	55.5606	0.1418	17.5423	0.879997	0.00731443	4.91037	0.072758	7.16915	9.88336	3.21945	0.106711	0.506184
2000	1343	100	55.5606	0.1418	17.5423	0.88016	0.00731443	4.91023	0.072758	7.16915	9.88335	3.21945	0.106711	0.506184
2000	1342	100	55.5606	0.1418	17.5423	0.880325	0.00731443	4.91008	0.0727579	7.16915	9.88335	3.21945	0.106711	0.506184
2000	1341	100	55.5606	0.1418	17.5423	0.880491	0.00731443	4.90993	0.0727579	7.16915	9.88335	3.21945	0.106711	0.506184
2000	1340	100	55.5606	0.1418	17.5423	0.880658	0.00731443	4.90978	0.0727579	7.16915	9.88335	3.21945	0.106711	0.506184
2000	1339	100	55.5606	0.1418	17.5423	0.880826	0.00731442	4.90962	0.0727579	7.16915	9.88335	3.21945	0.106711	0.506184
2000	1338	100	55.5605	0.1418	17.5423	0.880996	0.00731442	4.90947	0.0727579	7.16914	9.88335	3.21945	0.106711	0.506184
2000	1337	100	55.5605	0.1418	17.5423	0.881166	0.00731442	4.90931	0.0727579	7.16914	9.88334	3.21945	0.106711	0.506184
2000	1336	100	55.5605	0.1418	17.5423	0.881338	0.00731442	4.90916	0.0727579	7.16914	9.88334	3.21945	0.106711	0.506184
2000	1335	100	55.5605	0.1418	17.5423	0.881511	0.00731442	4.909	0.0727579	7.16914	9.88334	3.21945	0.106711	0.506184
2000	1334	100	55.5605	0.1418	17.5423	0.881686	0.00731442	4.90884	0.0727578	7.16914	9.88334	3.21945	0.106711	0.506183
2000	1333	100	55.5605	0.1418	17.5423	0.881861	0.00731442	4.90869	0.0727578	7.16914	9.88334	3.21945	0.10671	0.506183
2000	1332	100	55.5605	0.1418	17.5423	0.882038	0.00731442	4.90853	0.0727578	7.16914	9.88334	3.21945	0.10671	0.506183
2000	1331	100	55.5605	0.1418	17.5423	0.882216	0.00731441	4.90836	0.0727578	7.16914	9.88333	3.21945	0.10671	0.506183
2000	1330	100	55.5605	0.1418	17.5423	0.882396	0.00731441	4.9082	0.0727578	7.16913	9.88333	3.21945	0.10671	0.506183
2000	1329	100	55.5605	0.1418	17.5423	0.882576	0.00731441	4.90804	0.0727578	7.16913	9.88333	3.21945	0.10671	0.506183
2000	1328	100	55.5604	0.1418	17.5423	0.882758	0.00731441	4.90787	0.0727578	7.16913	9.88333	3.21944	0.10671	0.506183
2000	1327	100	55.5604	0.1418	17.5422	0.882941	0.00731441	4.90771	0.0727578	7.16913	9.88333	3.21944	0.10671	0.506183
2000	1326	100	55.5604	0.1418	17.5422	0.883126	0.00731441	4.90754	0.0727577	7.16913	9.88333	3.21944	0.10671	0.506183
2000	1325	100.001	55.5604	0.1418	17.5422	0.883311	0.00731441	4.90737	0.0727577	7.16913	9.88332	3.21944	0.10671	0.506183
2000	1324	100.001	55.5604	0.1418	17.5422	0.883498	0.0073144	4.9072	0.0727577	7.16913	9.88332	3.21944	0.10671	0.506183
2000	1323	100.001	55.5604	0.1418	17.5422	0.883686	0.0073144	4.90703	0.0727577	7.16913	9.88332	3.21944	0.10671	0.506182
2000	1322	100.001	55.5604	0.1418	17.5422	0.883876	0.0073144	4.90686	0.0727577	7.16912	9.88332	3.21944	0.10671	0.506182
2000	1321	100.001	55.5604	0.1418	17.5422	0.884067	0.0073144	4.90669	0.0727577	7.16912	9.88332	3.21944	0.10671	0.506182
2000	1320	100.001	55.5604	0.1418	17.5422	0.884259	0.0073144	4.90651	0.0727577	7.16912	9.88331	3.21944	0.10671	0.506182
2000	1319	100.001	55.5604	0.1418	17.5422	0.884452	0.0073144	4.90634	0.0727576	7.16912	9.88331	3.21944	0.10671	0.506182
2000	1318	100.001	55.5603	0.1418	17.5422	0.884646	0.0073144	4.90616	0.0727576	7.16912	9.88331	3.21944	0.10671	0.506182
2000	1317	100.001	55.5603	0.1418	17.5422	0.884842	0.0073144	4.90599	0.0727576	7.16912	9.88331	3.21944	0.10671	0.506182
2000	1316	100.001	55.5603	0.1418	17.5422	0.885039	0.00731439	4.90581	0.0727576	7.16912	9.88331	3.21944	0.10671	0.506182
2000	1315	100.001	55.5603	0.1418	17.5422	0.885238	0.00731439	4.90563	0.0727576	7.16911	9.8833	3.21944	0.10671	0.506182
2000	1314	100.001	55.5603	0.1418	17.5422	0.885438	0.00731439	4.90545	0.0727576	7.16911	9.8833	3.21944	0.10671	0.506182
2000	1313	100.001	55.5603	0.141799	17.5422	0.885639	0.00731439	4.90526	0.0727576	7.16911	9.8833	3.21944	0.10671	0.506181
2000	1312	100.001	55.5603	0.141799	17.5422	0.885841	0.00731439	4.90508	0.0727575	7.16911	9.8833	3.21943	0.10671	0.506181
2000	1311	100.001	55.5603	0.141799	17.5422	0.886045	0.00731439	4.9049	0.0727575	7.16911	9.8833	3.21943	0.10671	0.506181
2000	1310	100.001	55.5603	0.141799	17.5422	0.88625	0.00731438	4.90471	0.0727575	7.16911	9.88329	3.21943	0.10671	0.506181
2000	1309	100.001	55.5602	0.141799	17.5422	0.886456	0.00731438	4.90452	0.0727575	7.16911	9.88329	3.21943	0.10671	0.506181
2000	1308	100.001	55.5602	0.141799	17.5422	0.886664	0.00731438	4.90434	0.0727575	7.1691	9.88329	3.21943	0.10671	0.506181
2000	1307	100.001	55.5602	0.141799	17.5422	0.886873	0.00731438	4.90415	0.0727575	7.1691	9.88329	3.21943	0.10671	0.506181
2000	1306	100.001	55.5602	0.141799	17.5422	0.887083	0.00731438	4.90396	0.0727574	7.1691	9.88329	3.21943	0.10671	0.506181
2000	1305	100.001	55.5602	0.141799	17.5422	0.887295	0.00731438	4.90377	0.0727574	7.1691	9.88328	3.21943	0.10671	0.506181
2000	1304	100.001	55.5602	0.141799	17.5422	0.887508	0.00731438	4.90357	0.0727574	7.1691	9.88328	3.21943	0.10671	0.50618
2000	1303	100.001	55.5602	0.141799	17.5422	0.887722	0.00731437	4.90338	0.0727574	7.1691	9.88328	3.21943	0.10671	0.50618
2000	1302	100.001	55.5602	0.141799	17.5422	0.887938	0.00731437	4.90318	0.0727574	7.1691	9.88328	3.21943	0.10671	0.50618
2000	1301	100.001	55.5601	0.141799	17.5422	0.888155	0.00731437	4.90299	0.0727574	7.16909	9.88328	3.21943	0.10671	0.50618
2000	1300	100.001	55.5601	0.141799	17.5422	0.888373	0.00731437	4.90279	0.0727574	7.16909	9.88327	3.21943	0.10671	0.50618
2000	1299	100.001	55.5601	0.141799	17.5421	0.888593	0.00731437	4.90259	0.0727573	7.16909	9.88327	3.21943	0.10671	0.50618
2000	1298	100.001	55.5601	0.141799	17.5421	0.888814	0.00731437	4.90239	0.0727573	7.16909	9.88327	3.21942	0.10671	0.50618
2000	1297	100.001	55.5601	0.141799	17.5421	0.889037	0.00731436	4.90219	0.0727573	7.16909	9.88327	3.21942	0.10671	0.50618
2000	1296	100.001	55.5601	0.141799	17.5421	0.889261	0.00731436	4.90198	0.0727573	7.16909	9.88326	3.21942	0.10671	0.50618
2000	1295	100.001	55.5601	0.141799	17.5421	0.889486	0.00731436	4.90178	0.0727573	7.16908	9.88326	3.21942	0.10671	0.506179
2000	1294	100.001	55.5601	0.141799	17.5421	0.889713	0.00731436	4.90158	0.0727573	7.16908	9.88326	3.21942	0.10671	0.506179
2000	1293	100.001	55.56	0.141799	17.5421	0.889941	0.00731436	4.90137	0.0727572	7.16908	9.88326	3.21942	0.10671	0.506179
2000	1292	100.001	55.56	0.141799	17.5421	0.89017	0.00731436	4.90116	0.0727572	7.16908	9.88326	3.21942	0.10671	0.506179
2000	1291	100.001	55.56	0.141799	17.5421	0.890401	0.00731435	4.90095	0.0727572	7.16908	9.88325	3.21942	0.10671	0.506179
2000	1290	100.001	55.56	0.141799	17.5421	0.890633	0.00731435	4.90074	0.0727572	7.16908	9.88325	3.21942	0.10671	0.506179
2000	1289	100.001	55.56	0.141799	17.5421	0.890867	0.00731435	4.90053	0.0727572	7.16907	9.88325	3.21942	0.10671	0.506179
2000	1288	100.001	55.56	0.141799	17.5421	0.891102	0.00731435	4.90032	0.0727572	7.16907	9.88325	3.21942	0.10671	0.506179
2000	1287	100.001	55.56	0.141799	17.5421	0.891338	0.00731435	4.9001	0.0727571	7.16907	9.88324	3.21942	0.106709	0.506179
2000	1286	100.001	55.56	0.141799	17.5421	0.891576	0.00731435	4.89989	0.0727571	7.16907	9.88324	3.21942	0.106709	0.506178
2000	1285	100.001	55.5599	0.141799	17.5421	0.891815	0.00731434	4.89967	0.0727571	7.16907	9.88324	3.21942	0.106709	0.506178
2000	1284	100.001	55.5599	0.141799	17.5421	0.892056	0.00731434	4.89945	0.0727571	7.16907	9.88324	3.21941	0.106709	0.506178
2000	1283	100.001	55.5599	0.141799	17.5421	0.892298	0.00731434	4.89923	0.0727571	7.16906	9.88323	3.21941	0.106709	0.506178
2000	1282	100.001	55.5599	0.141799	17.5421	0.892541	0.00731434	4.89901	0.0727571	7.16906	9.88323	3.21941	0.106709	0.506178
2000	1281	100.001	55.5599	0.141798	17.5421	0.892786	0.00731434	4.89879	0.072757	7.16906	9.88323	3.21941	0.106709	0.506178
2000	1280	100.001	55.5599	0.141798	17.5421	0.893033	0.00731433	4.89857	0.072757	7.16906	9.88323	3.21941	0.106709	0.506178
2000	1279	100.002	55.5599	0.141798	17.5421	0.893281	0.00731433	4.89834	0.072757	7.16906	9.88322	3.21941	0.106709	0.506178
2000	1278	100.002	55.5598	0.141798	17.5421	0.89353	0.00731433	4.89812	0.072757	7.16905	9.88322	3.21941	0.106709	0.506177
2000	1277	100.002	55.5598	0.141798	17.5421	0.893781	0.00731433	4.89789	0.072757	7.16905	9.88322	3.21941	0.106709	0.506177
2000	1276	100.002	55.5598	0.141798	17.5421	0.894033	0.00731433	4.89766	0.0727569	7.16905	9.88322	3.21941	0.106709	0.506177
2000	1275	100.002	55.5598	0.141798	17.542	0.894287	0.00731433	4.89743	0.0727569	7.16905	9.88321	3.21941	0.106709	0.506177
2000	1274	100.002	55.5598	0.141798	17.542	0.894542	0.00731432	4.8972	0.0727569	7.16905	9.88321	3.21941	0.106709	0.506177
2000	1273	100.002	55.5598	0.141798	17.542	0.894798	0.00731432	4.89697	0.0727569	7.16905	9.88321	3.21941	0.106709	0.506177
2000	1272	100.002	55.5598	0.141798	17.542	0.895057	0.00731432	4.89674	0.0727569	7.16904	9.88321	3.2194	0.106709	0.506177
2000	1271	100.002	55.5597	0.141798	17.542	0.895316	0.00731432	4.8965	0.0727568	7.16904	9.8832	3.2194	0.106709	0.506177
2000	1270	100.002	55.5597	0.141798	17.542	0.895577	0.00731432	4.89627	0.0727568	7.16904	9.8832	3.2194	0.106709	0.506176
2000	1269	100.002	55.5597	0.141798	17.542	0.89584	0.00731431	4.89603	0.0727568	7.16904	9.8832	3.2194	0.106709	0.506176
2000	1268	100.002	55.5597	0.141798	17.542	0.896104	0.00731431	4.89579	0.0727568	7.16904	9.8832	3.2194	0.106709	0.506176
2000	1267	100.002	55.5597	0.141798	17.542	0.896369	0.00731431	4.89555	0.0727568	7.16903	9.88319	3.2194	0.106709	0.506176
2000	1266	100.002	55.5597	0.141798	17.542	0.896636	0.00731431	4.89531	0.0727568	7.16903	9.88319	3.2194	0.106709	0.506176
2000	1265	100.002	55.5597	0.141798	17.542	0.896905	0.00731431	4.89506	0.0727567	7.16903	9.88319	3.2194	0.106709	0.506176
2000	1264	100.002	55.5596	0.141798	17.542	0.897175	0.0073143	4.89482	0.0727567	7.16903	9.88319	3.2194	0.106709	0.506176
2000	1263	100.002	55.5596	0.141798	17.542	0.897446	0.0073143	4.89457	0.0727567	7.16903	9.88318	3.2194	0.106709	0.506175
2000	1262	100.002	55.5596	0.141798	17.542	0.89772	0.0073143	4.89433	0.0727567	7.16902	9.88318	3.2194	0.106709	0.506175
2000	1261	100.002	55.5596	0.141798	17.542	0.897994	0.0073143	4.89408	0.0727567	7.16902	9.88318	3.2194	0.106709	0.506175
2000	1260	100.002	55.5596	0.141798	17.542	0.89827	0.0073143	4.89383	0.0727566	7.16902	9.88318	3.21939	0.106709	0.506175
2000	1259	100.002	55.5596	0.141798	17.542	0.898548	0.00731429	4.89358	0.0727566	7.16902	9.88317	3.21939	0.106709	0.506175
2000	1258	100.002	55.5596	0.141798	17.542	0.898827	0.00731429	4.89332	0.0727566	7.16902	9.88317	3.21939	0.106709	0.506175
2000	1257	100.002	55.5595	0.141798	17.542	0.899108	0.00731429	4.89307	0.0727566	7.16901	9.88317	3.21939	0.106709	0.506175
2000	1256	100.002	55.5595	0.141798	17.542	0.89939	0.00731429	4.89281	0.0727566	7.16901	9.88316	3.21939	0.106709	0.506174
2000	1255	100.002	55.5595	0.141798	17.542	0.899674	0.00731429	4.89256	0.0727565	7.16901	9.88316	3.21939	0.106709	0.506174
2000	1254	100.002	55.5595	0.141797	17.5419	0.89996	0.00731428	4.8923	0.0727565	7.16901	9.88316	3.21939	0.106709	0.506174
2000	1253	100.002	55.5595	0.141797	17.5419	0.900247	0.00731428	4.89204	0.0727565	7.16901	9.88316	3.21939	0.106709	0.506174
2000	1252	100.002	55.5595	0.141797	17.5419	0.900535	0.00731428	4.89178	0.0727565	7.169	9.88315	3.21939	0.106708	0.506174
2000	1251	100.002	55.5594	0.141797	17.5419	0.900825	0.00731428	4.89151	0.0727564	7.169	9.88315	3.21939	0.106708	0.506174
2000	1250	100.002	55.5594	0.141797	17.5419	0.901117	0.00731428	4.89125	0.0727564	7.169	9.88315	3.21939	0.106708	0.506174
2000	1249	100.002	55.5594	0.141797	17.5419	0.90141	0.00731427	4.89098	0.0727564	7.169	9.88314	3.21938	0.106708	0.506173
2000	1248	100.002	55.5594	0.141797	17.5419	0.901705	0.00731427	4.89072	0.0727564	7.169	9.88314	3.21938	0.106708	0.506173
2000	1247	100.002	55.5594	0.141797	17.5419	0.902002	0.00731427	4.89045	0.0727564	7.16899	9.88314	3.21938	0.106708	0.506173
2000	1246	100.002	55.5594	0.141797	17.5419	0.9023	0.00731427	4.89018	0.0727563	7.16899	9.88314	3.21938	0.106708	0.506173
2000	1245	100.002	55.5593	0.141797	17.5419	0.902599	0.00731426	4.88991	0.0727563	7.16899	9.88313	3.21938	0.106708	0.506173
2000	1244	100.002	55.5593	0.141797	17.5419	0.902901	0.00731426	4.88963	0.0727563	7.16899	9.88313	3.21938	0.106708	0.506173
2000	1243	100.003	55.5593	0.141797	17.5419	0.903203	0.00731426	4.88936	0.0727563	7.16899	9.88313	3.21938	0.106708	0.506173
2000	1242	100.003	55.5593	0.141797	17.5419	0.903508	0.00731426	4.88908	0.0727563	7.16898	9.88312	3.21938	0.106708	0.506172
2000	1241	100.003	55.5593	0.141797	17.5419	0.903814	0.00731426	4.88881	0.0727562	7.16898	9.88312	3.21938	0.106708	0.506172
2000	1240	100.003	55.5593	0.141797	17.5419	0.904122	0.00731425	4.88853	0.0727562	7.16898	9.88312	3.21938	0.106708	0.506172
2000	1239	100.003	55.5592	0.141797	17.5419	0.904431	0.00731425	4.88825	0.0727562	7.16898	9.88311	3.21937	0.106708	0.506172
2000	1238	100.003	55.5592	0.141797	17.5419	0.904742	0.00731425	4.88797	0.0727562	7.16897	9.88311	3.21937	0.106708	0.506172
2000	1237	100.003	55.5592	0.141797	17.5419	0.905055	0.00731425	4.88768	0.0727561	7.16897	9.88311	3.21937	0.106708	0.506172
2000	1236	100.003	55.5592	0.141797	17.5419	0.905369	0.00731424	4.8874	0.0727561	7.16897	9.8831	3.21937	0.106708	0.506171
2000	1235	100.003	55.5592	0.141797	17.5418	0.905685	0.00731424	4.88711	0.0727561	7.16897	9.8831	3.21937	0.106708	0.506171
2000	1234	100.003	55.5592	0.141797	17.5418	0.906003	0.00731424	4.88682	0.0727561	7.16897	9.8831	3.21937	0.106708	0.506171
2000	1233	100.003	55.5591	0.141797	17.5418	0.906322	0.00731424	4.88654	0.072756	7.16896	9.8831	3.21937	0.106708	0.506171
2000	1232	100.003	55.5591	0.141797	17.5418	0.906643	0.00731424	4.88624	0.072756	7.16896	9.88309	3.21937	0.106708	0.506171
2000	1231	100.003	55.5591	0.141796	17.5418	0.906966	0.00731423	4.88595	0.072756	7.16896	9.88309	3.21937	0.106708	0.506171
2000	1230	100.003	55.5591	0.141796	17.5418	0.90729	0.00731423	4.88566	0.072756	7.16896	9.88309	3.21937	0.106708	0.50617
2000	1229	100.003	55.5591	0.141796	17.5418	0.907616	0.00731423	4.88536	0.072756	7.16895	9.88308	3.21936	0.106708	0.50617
2000	1228	100.003	55.559	0.141796	17.5418	0.907944	0.00731423	4.88507	0.0727559	7.16895	9.88308	3.21936	0.106708	0.50617
2000	1227	100.003	55.559	0.141796	17.5418	0.908273	0.00731422	4.88477	0.0727559	7.16895	9.88308	3.21936	0.106708	0.50617
2000	1226	100.003	55.559	0.141796	17.5418	0.908604	0.00731422	4.88447	0.0727559	7.16895	9.88307	3.21936	0.106708	0.50617
2000	1225	100.003	55.559	0.141796	17.5418	0.908937	0.00731422	4.88417	0.0727559	7.16894	9.88307	3.21936	0.106708	0.50617
2000	1224	100.003	55.559	0.141796	17.5418	0.909272	0.00731422	4.88386	0.0727558	7.16894	9.88307	3.21936	0.106708	0.506169
2000	1223	100.003	55.559	0.141796	17.5418	0.909608	0.00731421	4.88356	0.0727558	7.16894	9.88306	3.21936	0.106708	0.506169
2000	1222	100.003	55.5589	0.141796	17.5418	0.909946	0.00731421	4.88325	0.0727558	7.16894	9.88306	3.21936	0.106707	0.506169
2000	1221	100.003	55.5589	0.141796	17.5418	0.910286	0.00731421	4.88295	0.0727558	7.16893	9.88306	3.21936	0.106707	0.506169
2000	1220	100.003	55.5589	0.141796	17.5418	0.910627	0.00731421	4.88264	0.0727557	7.16893	9.88305	3.21935	0.106707	0.506169
2000	1219	100.003	55.5589	0.141796	17.5418	0.91097	0.0073142	4.88233	0.0727557	7.16893	9.88305	3.21935	0.106707	0.506169
2000	1218	100.003	55.5589	0.141796	17.5417	0.911315	0.0073142	4.88201	0.0727557	7.16893	9.88305	3.21935	0.106707	0.506168
2000	1217	100.003	55.5588	0.141796	17.5417	0.911662	0.0073142	4.8817	0.0727557	7.16892	9.88304	3.21935	0.106707	0.506168
2000	1216	100.003	55.5588	0.141796	17.5417	0.91201	0.0073142	4.88138	0.0727556	7.16892	9.88304	3.21935	0.106707	0.506168
2000	1215	100.003	55.5588	0.141796	17.5417	0.91236	0.00731419	4.88107	0.0727556	7.16892	9.88304	3.21935	0.106707	0.506168
2000	1214	100.003	55.5588	0.141796	17.5417	0.912712	0.00731419	4.88075	0.0727556	7.16892	9.88303	3.21935	0.106707	0.506168
2000	1213	100.003	55.5588	0.141796	17.5417	0.913066	0.00731419	4.88043	0.0727556	7.16891	9.88303	3.21935	0.106707	0.506168
2000	1212	100.004	55.5587	0.141796	17.5417	0.913422	0.00731419	4.88011	0.0727555	7.16891	9.88303	3.21935	0.106707	0.506167
2000	1211	100.004	55.5587	0.141795	17.5417	0.913779	0.00731418	4.87978	0.0727555	7.16891	9.88302	3.21934	0.106707	0.506167
2000	1210	100.004	55.5587	0.141795	17.5417	0.914138	0.00731418	4.87946	0.0727555	7.16891	9.88302	3.21934	0.106707	0.506167
2000	1209	100.004	55.5587	0.141795	17.5417	0.914499	0.00731418	4.87913	0.0727554	7.1689	9.88301	3.21934	0.106707	0.506167
2000	1208	99.7839	55.5589	0.142079	17.5749	0.9143	0.00733028	4.872	0.0729157	7.11646	9.90054	3.22638	0.106942	0.507281
2000	1207	99.6452	55.559	0.142258	17.596	0.914302	0.00734049	4.86734	0.0730171	7.08329	9.91161	3.23084	0.107091	0.507987
2000	1206	99.5071	55.5591	0.142438	17.617	0.914298	0.00735067	4.86264	0.0731185	7.0502	9.92265	3.2353	0.107239	0.508692
2000	1205	99.3696	55.5593	0.142617	17.6379	0.914291	0.00736085	4.85792	0.0732197	7.01721	9.93366	3.23975	0.107388	0.509397
2000	1204	98.604	55.5882	0.143683	17.6168	0.917768	0.007418	4.87023	0.0737882	6.97511	9.9339	3.25156	0.108166	0.513352
2000	1203	97.1803	55.6484	0.145722	17.5499	0.925036	0.00752668	4.90101	0.0748692	6.9233	9.9225	3.27128	0.109631	0.520872
2000	1202	95.7985	55.7082	0.147759	17.4833	0.932261	0.00763524	4.93146	0.0759491	6.8719	9.91125	3.29083	0.111093	0.528385
2000	1201	94.457	55.7677	0.149794	17.417	0.939444	0.00774368	4.9616	0.0770278	6.82092	9.90013	3.3102	0.112552	0.53589
2000	1200	93.1538	55.8269	0.151826	17.3511	0.946585	0.00785201	4.99142	0.0781053	6.77033	9.88915	3.32939	0.114007	0.543386
2000	1199	91.8875	55.8857	0.153856	17.2854	0.953686	0.00796022	5.02094	0.0791818	6.72015	9.8783	3.34841	0.115458	0.550875
2000	1198	90.6564	55.9443	0.155884	17.2201	0.960746	0.00806832	5.05016	0.080257	6.67035	9.86758	3.36727	0.116906	0.558356
2000	1197	89.4591	56.0025	0.15791	17.1552	0.967767	0.0081763	5.07907	0.0813312	6.62093	9.85698	3.38596	0.11835	0.565829
2000	1196	88.2942	56.0604	0.159934	17.0905	0.974749	0.00828417	5.10769	0.0824042	6.57189	9.84651	3.4045	0.119791	0.573294
2000	1195	87.1604	56.1181	0.161955	17.0262	0.981692	0.00839193	5.13602	0.0834761	6.52321	9.83614	3.42288	0.121229	0.580751
2000	1194	86.0566	56.1754	0.163975	16.9621	0.988597	0.00849958	5.16407	0.0845468	6.4749	9.8259	3.4411	0.122663	0.5882
2000	1193	84.9814	56.2325	0.165992	16.8984	0.995465	0.00860711	5.19183	0.0856165	6.42694	9.81576	3.45918	0.124093	0.595642
2000	1192	83.9339	56.2893	0.168007	16.835	1.0023	0.00871453	5.21931	0.086685	6.37934	9.80573	3.47711	0.125521	0.603076
2000	1191	82.913	56.3458	0.17002	16.7718	1.00909	0.00882183	5.24652	0.0877524	6.33207	9.7958	3.49489	0.126945	0.610502
2000	1190	81.9175	56.402	0.172031	16.709	1.01585	0.00892903	5.27345	0.0888187	6.28515	9.78598	3.51253	0.128366	0.61792
2000	1189	80.9467	56.458	0.17404	16.6464	1.02257	0.00903612	5.30012	0.0898839	6.23856	9.77625	3.53004	0.129783	0.625331
2000	1188	79.7882	56.5285	0.176295	16.6331	1.02761	0.00916733	5.3288	0.0911891	6.17285	9.70865	3.55786	0.131555	0.634411
2000	1187	78.721	56.5947	0.178474	16.6061	1.03306	0.0092916	5.35656	0.0924253	6.11321	9.65749	3.58253	0.133223	0.643012
2000	1186	77.684	56.6604	0.180646	16.579	1.03846	0.00941563	5.38403	0.093659	6.05422	9.60675	3.60695	0.134885	0.651595
2000	1185	76.676	56.7259	0.182811	16.5517	1.04381	0.00953941	5.4112	0.0948903	5.99586	9.55643	3.63112	0.136543	0.660161
2000	1184	75.6958	56.791	0.184969	16.5244	1.04912	0.00966295	5.4381	0.0961191	5.93814	9.50653	3.65505	0.138195	0.66871
2000	1183	74.7421	56.8558	0.18712	16.497	1.05438	0.00978624	5.46472	0.0973455	5.88103	9.45702	3.67874	0.139841	0.677242
2000	1182	73.814	56.9203	0.189264	16.4694	1.0596	0.00990929	5.49107	0.0985695	5.82454	9.40793	3.70219	0.141483	0.685758
2000	1181	72.9104	56.9844	0.191402	16.4418	1.06478	0.0100321	5.51715	0.0997911	5.76864	9.35922	3.72541	0.14312	0.694256
2000	1180	72.0304	57.0482	0.193533	16.414	1.06992	0.0101547	5.54296	0.10101	5.71334	9.31091	3.7484	0.144751	0.702739
2000	1179	71.1729	57.1117	0.195657	16.3862	1.07502	0.010277	5.56852	0.102227	5.65862	9.26299	3.77117	0.146377	0.711205
2000	1178	70.3373	57.175	0.197775	16.3582	1.08007	0.0103991	5.59383	0.103442	5.60447	9.21545	3.79371	0.147999	0.719654
2000	1177	69.5226	57.2379	0.199887	16.3302	1.08509	0.010521	5.61889	0.104654	5.55089	9.16828	3.81602	0.149615	0.728088
2000	1176	68.728	57.3004	0.201992	16.3021	1.09008	0.0106426	5.64371	0.105864	5.49787	9.12149	3.83812	0.151227	0.736505
2000	1175	67.9346	57.3658	0.204141	16.2746	1.09431	0.0107669	5.66391	0.1071	5.44545	9.07519	3.86078	0.152873	0.745107
2000	1174	67.1518	57.4314	0.206316	16.2458	1.09855	0.0108924	5.68367	0.108349	5.39253	9.03078	3.88338	0.154533	0.753792
2000	1173	66.3883	57.4967	0.208485	16.2169	1.10276	0.0110177	5.7032	0.109595	5.34017	8.98672	3.90575	0.156188	0.762461
2000	1172	65.6433	57.5618	0.210647	16.1879	1.10694	0.0111427	5.72252	0.110839	5.28836	8.94298	3.92792	0.157838	0.771114
2000	1171	64.9162	57.6265	0.212802	16.1589	1.11109	0.0112675	5.74163	0.11208	5.23709	8.89958	3.94987	0.159483	0.779752
2000	1170	64.2063	57.6909	0.214952	16.1297	1.11521	0.0113921	5.76054	0.113319	5.18636	8.85651	3.97161	0.161123	0.788373
2000	1169	63.513	57.7551	0.217096	16.1004	1.11929	0.0115165	5.77925	0.114556	5.13616	8.81376	3.99315	0.162758	0.796979
2000	1168	62.8357	57.8189	0.219233	16.0711	1.12335	0.0116406	5.79775	0.115791	5.08648	8.77132	4.01448	0.164389	0.80557
2000	1167	62.1738	57.8825	0.221365	16.0416	1.12738	0.0117645	5.81606	0.117024	5.03731	8.7292	4.03561	0.166015	0.814145
2000	1166	61.5269	57.9458	0.22349	16.0121	1.13139	0.0118882	5.83418	0.118254	4.98865	8.6874	4.05655	0.167636	0.822705
2000	1165	60.8945	58.0088	0.22561	15.9825	1.13536	0.0120117	5.85212	0.119482	4.94049	8.6459	4.07728	0.169252	0.83125
2000	1164	60.2759	58.0715	0.227724	15.9528	1.13931	0.0121349	5.86986	0.120708	4.89282	8.6047	4.09782	0.170864	0.83978
2000	1163	59.6709	58.1339	0.229833	15.923	1.14324	0.012258	5.88743	0.121932	4.84564	8.56381	4.11816	0.172471	0.848295
2000	1162	59.0789	58.1961	0.231936	15.8931	1.14713	0.0123808	5.90482	0.123154	4.79894	8.52321	4.13832	0.174074	0.856795
2000	1161	58.4995	58.258	0.234033	15.8632	1.15101	0.0125034	5.92203	0.124374	4.75271	8.48291	4.15829	0.175672	0.865281
2000	1160	57.9323	58.3196	0.236125	15.8332	1.15486	0.0126258	5.93907	0.125592	4.70695	8.4429	4.17807	0.177266	0.873753
2000	1159	57.377	58.381	0.238211	15.8031	1.15868	0.0127481	5.95594	0.126807	4.66165	8.40317	4.19766	0.178855	0.88221
2000	1158	56.833	58.4421	0.240292	15.7729	1.16248	0.0128701	5.97264	0.128021	4.6168	8.36373	4.21708	0.18044	0.890653
2000	1157	56.3002	58.503	0.242367	15.7426	1.16626	0.0129919	5.98917	0.129232	4.57241	8.32457	4.23631	0.18202	0.899082
2000	1156	55.7781	58.5635	0.244438	15.7123	1.17002	0.0131135	6.00555	0.130442	4.52845	8.28569	4.25537	0.183597	0.907497
2000	1155	55.2665	58.6239	0.246503	15.6819	1.17375	0.0132349	6.02177	0.13165	4.48493	8.24709	4.27424	0.185168	0.915899
2000	1154	54.7649	58.6839	0.248563	15.6514	1.17746	0.0133561	6.03782	0.132855	4.44185	8.20876	4.29295	0.186736	0.924287
2000	1153	54.2732	58.7437	0.250618	15.6209	1.18116	0.0134771	6.05373	0.134059	4.39919	8.17069	4.31148	0.188299	0.932661
2000	1152	53.791	58.8033	0.252668	15.5903	1.18483	0.0135979	6.06948	0.135261	4.35694	8.1329	4.32984	0.189858	0.941023
2000	1151	53.318	58.8626	0.254713	15.5596	1.18848	0.0137185	6.08508	0.136461	4.31512	8.09536	4.34803	0.191413	0.949371
2000	1150	52.8539	58.9217	0.256754	15.5289	1.19211	0.013839	6.10054	0.137659	4.2737	8.05809	4.36605	0.192964	0.957706
2000	1149	52.3986	58.9805	0.258789	15.4981	1.19572	0.0139592	6.11584	0.138855	4.23269	8.02108	4.38391	0.194511	0.966028
2000	1148	51.9518	59.0391	0.26082	15.4672	1.19931	0.0140793	6.13101	0.140049	4.19207	7.98432	4.40161	0.196054	0.974337
2000	1147	51.5131	59.0975	0.262846	15.4363	1.20288	0.0141992	6.14603	0.141242	4.15185	7.94781	4.41914	0.197592	0.982634
2000	1146	51.0825	59.1556	0.264867	15.4053	1.20644	0.0143189	6.16092	0.142433	4.11202	7.91156	4.43651	0.199127	0.990918
2000	1145	50.6596	59.2135	0.266884	15.3743	1.20997	0.0144384	6.17566	0.143622	4.07257	7.87555	4.45372	0.200658	0.99919
2000	1144	50.2442	59.2711	0.268896	15.3432	1.21349	0.0145578	6.19027	0.144809	4.0335	7.83978	4.47078	0.202184	1.00745
2000	1143	49.8362	59.3285	0.270904	15.312	1.21699	0.014677	6.20475	0.145994	3.99481	7.80426	4.48768	0.203707	1.0157
2000	1142	49.4354	59.3857	0.272908	15.2808	1.22048	0.014796	6.21909	0.147178	3.95648	7.76898	4.50442	0.205226	1.02393
2000	1141	49.0415	59.4427	0.274907	15.2495	1.22395	0.0149148	6.23331	0.14836	3.91852	7.73394	4.52102	0.206741	1.03216
2000	1140	48.6544	59.4994	0.276901	15.2182	1.2274	0.0150335	6.24739	0.149541	3.88092	7.69913	4.53746	0.208253	1.04037
2000	1139	48.2738	59.5559	0.278892	15.1868	1.23083	0.015152	6.26135	0.15072	3.84368	7.66456	4.55375	0.20976	1.04857
2000	1138	47.8997	59.6122	0.280878	15.1554	1.23425	0.0152703	6.27518	0.151897	3.80679	7.63022	4.5699	0.211264	1.05676
2000	1137	47.5319	59.6683	0.28286	15.1239	1.23766	0.0153885	6.28889	0.153072	3.77024	7.5961	4.58589	0.212765	1.06494
2000	1136	47.1701	59.7241	0.284838	15.0924	1.24105	0.0155065	6.30248	0.154246	3.73404	7.56221	4.60175	0.214261	1.07311
2000	1135	46.8143	59.7798	0.286812	15.0608	1.24442	0.0156244	6.31594	0.155418	3.69818	7.52855	4.61746	0.215754	1.08126
2000	1134	46.4643	59.8352	0.288782	15.0292	1.24778	0.0157421	6.32929	0.156589	3.66265	7.4951	4.63302	0.217243	1.08941
2000	1133	46.1199	59.8904	0.290748	14.9976	1.25112	0.0158596	6.34251	0.157759	3.62746	7.46188	4.64845	0.218729	1.09754
2000	1132	45.781	59.9454	0.29271	14.9658	1.25445	0.015977	6.35563	0.158926	3.59259	7.42887	4.66374	0.220211	1.10567
2000	1131	45.4475	60.0002	0.294668	14.9341	1.25777	0.0160943	6.36862	0.160093	3.55804	7.39608	4.67889	0.22169	1.11378
2000	1130	45.1193	60.0548	0.296623	14.9023	1.26107	0.0162114	6.3815	0.161257	3.52381	7.3635	4.6939	0.223165	1.12188
2000	1129	44.7961	60.1092	0.298573	14.8705	1.26436	0.0163283	6.39427	0.162421	3.4899	7.33114	4.70877	0.224636	1.12998
2000	1128	44.4779	60.1633	0.30052	14.8386	1.26763	0.0164451	6.40693	0.163582	3.4563	7.29898	4.72351	0.226105	1.13806
2000	1127	44.1646	60.2173	0.302464	14.8067	1.2709	0.0165618	6.41947	0.164743	3.42301	7.26703	4.73812	0.227569	1.14613
2000	1126	43.8561	60.2711	0.304403	14.7747	1.27414	0.0166783	6.43191	0.165902	3.39002	7.23528	4.7526	0.229031	1.1542
2000	1125	43.5522	60.3247	0.306339	14.7427	1.27738	0.0167947	6.44424	0.16706	3.35733	7.20374	4.76695	0.230489	1.16225
2000	1124	43.2528	60.3781	0.308272	14.7107	1.2806	0.0169109	6.45646	0.168216	3.32494	7.1724	4.78116	0.231944	1.17029
2000	1123	42.9579	60.4313	0.310201	14.6786	1.28382	0.017027	6.46857	0.169371	3.29284	7.14126	4.79525	0.233395	1.17833
2000	1122	42.6673	60.4843	0.312127	14.6465	1.28702	0.017143	6.48058	0.170524	3.26104	7.11032	4.80922	0.234843	1.18636
2000	1121	42.3809	60.5371	0.314049	14.6144	1.2902	0.0172588	6.49249	0.171677	3.22952	7.07957	4.82305	0.236288	1.19437
2000	1120	42.0986	60.5897	0.315968	14.5822	1.29338	0.0173745	6.50429	0.172828	3.19828	7.04902	4.83677	0.23773	1.20238
2000	1119	41.8204	60.6422	0.317883	14.55	1.29654	0.0174901	6.516	0.173977	3.16733	7.01866	4.85036	0.239169	1.21038
2000	1118	41.5462	60.6944	0.319795	14.5178	1.2997	0.0176056	6.52759	0.175126	3.13665	6.98849	4.86382	0.240604	1.21837
2000	1117	41.2758	60.7465	0.321704	14.4856	1.30284	0.0177209	6.53909	0.176273	3.10625	6.95851	4.87717	0.242036	1.22635
2000	1116	41.0092	60.7984	0.32361	14.4533	1.30597	0.0178361	6.55049	0.177419	3.07611	6.92872	4.89039	0.243466	1.23432
2000	1115	40.7463	60.8501	0.325513	14.421	1.30909	0.0179512	6.5618	0.178564	3.04625	6.89911	4.9035	0.244892	1.24229
2000	1114	40.487	60.9016	0.327412	14.3886	1.31219	0.0180662	6.573	0.179707	3.01665	6.86969	4.91649	0.246315	1.25024
2000	1113	40.2312	60.953	0.329309	14.3562	1.31529	0.018181	6.58411	0.18085	2.98731	6.84045	4.92936	0.247735	1.25819
2000	1112	39.979	61.0042	0.331202	14.3238	1.31838	0.0182957	6.59512	0.181991	2.95823	6.81139	4.94212	0.249152	1.26613
2000	1111	39.7301	61.0552	0.333092	14.2914	1.32146	0.0184103	6.60603	0.183131	2.92941	6.78251	4.95476	0.250566	1.27406
2000	1110	39.4845	61.106	0.33498	14.259	1.32452	0.0185248	6.61685	0.18427	2.90084	6.7538	4.96729	0.251977	1.28198
2000	1109	39.2422	61.1567	0.336864	14.2265	1.32758	0.0186392	6.62758	0.185408	2.87252	6.72527	4.97971	0.253385	1.2899
2000	1108	39.003	61.2071	0.338746	14.194	1.33063	0.0187535	6.63821	0.186545	2.84444	6.69692	4.99201	0.25479	1.29781
2000	1107	38.767	61.2575	0.340624	14.1615	1.33366	0.0188677	6.64875	0.18768	2.81662	6.66874	5.00421	0.256192	1.30571
2000	1106	38.5341	61.3076	0.3425	14.1289	1.33669	0.0189818	6.65919	0.188815	2.78903	6.64073	5.01629	0.257592	1.3136
2000	1105	38.3041	61.3576	0.344373	14.0964	1.33971	0.0190957	6.66955	0.189949	2.76169	6.61289	5.02827	0.258988	1.32149
2000	1104	38.0771	61.4074	0.346244	14.0638	1.34272	0.0192096	6.67981	0.191081	2.73458	6.58522	5.04014	0.260382	1.32937
2000	1103	37.8529	61.4571	0.348111	14.0312	1.34571	0.0193233	6.68999	0.192213	2.7077	6.55772	5.0519	0.261773	1.33724
2000	1102	37.6316	61.5066	0.349976	13.9986	1.3487	0.019437	6.70007	0.193343	2.68106	6.53038	5.06356	0.263162	1.34511
2000	1101	37.413	61.556	0.351838	13.966	1.35168	0.0195505	6.71007	0.194473	2.65465	6.5032	5.07511	0.264547	1.35297
2000	1100	37.1971	61.6051	0.353698	13.9333	1.35465	0.019664	6.71997	0.195601	2.62847	6.47619	5.08656	0.26593	1.36082
2000	1099	36.9839	61.6542	0.355555	13.9006	1.35762	0.0197774	6.72979	0.196729	2.6025	6.44934	5.09791	0.26731	1.36866
2000	1098	36.7733	61.7031	0.357409	13.8679	1.36057	0.0198906	6.73952	0.197856	2.57677	6.42265	5.10915	0.268687	1.3765
2000	1097	36.5652	61.7518	0.359261	13.8352	1.36351	0.0200038	6.74916	0.198982	2.55125	6.39612	5.12029	0.270062	1.38434
2000	1096	36.3597	61.8004	0.361111	13.8025	1.36645	0.0201169	6.75871	0.200107	2.52594	6.36975	5.13133	0.271434	1.39216
2000	1095	36.1566	61.8488	0.362957	13.7698	1.36938	0.0202299	6.76818	0.201231	2.50086	6.34353	5.14228	0.272804	1.39998
2000	1094	35.9559	61.897	0.364802	13.7371	1.37229	0.0203428	6.77756	0.202354	2.47598	6.31747	5.15312	0.27417	1.4078
2000	1093	35.7576	61.9452	0.366644	13.7043	1.3752	0.0204557	6.78686	0.203476	2.45132	6.29156	5.16387	0.275535	1.4156
2000	1092	35.5616	61.9931	0.368484	13.6715	1.3781	0.0205684	6.79606	0.204598	2.42687	6.2658	5.17452	0.276896	1.42341
2000	1091	35.3678	62.041	0.370321	13.6388	1.381	0.0206811	6.80519	0.205718	2.40262	6.2402	5.18508	0.278256	1.4312
2000	1090	35.1764	62.0887	0.372156	13.606	1.38388	0.0207936	6.81423	0.206838	2.37858	6.21474	5.19554	0.279612	1.43899
2000	1089	34.9871	62.1362	0.373988	13.5732	1.38676	0.0209061	6.82318	0.207957	2.35473	6.18943	5.2059	0.280967	1.44678
2000	1088	34.7999	62.1836	0.375819	13.5404	1.38963	0.0210185	6.83205	0.209075	2.33109	6.16427	5.21617	0.282318	1.45456
2000	1087	34.6149	62.2309	0.377647	13.5076	1.39249	0.0211309	6.84084	0.210193	2.30765	6.13926	5.22635	0.283667	1.46233
2000	1086	34.432	62.278	0.379473	13.4747	1.39534	0.0212432	6.84954	0.21131	2.2844	6.11439	5.23644	0.285014	1.4701
2000	1085	34.2511	62.325	0.381297	13.4419	1.39818	0.0213553	6.85816	0.212425	2.26135	6.08966	5.24644	0.286359	1.47786
2000	1084	34.0722	62.3719	0.383118	13.4091	1.40102	0.0214675	6.86669	0.213541	2.23848	6.06508	5.25635	0.287701	1.48562
2000	1083	33.8953	62.4186	0.384938	13.3762	1.40384	0.0215795	6.87514	0.214655	2.21581	6.04064	5.26617	0.28904	1.49338
2000	1082	33.7203	62.4652	0.386755	13.3434	1.40666	0.0216915	6.88351	0.215769	2.19333	6.01634	5.2759	0.290378	1.50113
2000	1081	33.5473	62.5116	0.38857	13.3105	1.40948	0.0218034	6.89179	0.216882	2.17103	5.99218	5.28554	0.291713	1.50887
2000	1080	33.3761	62.558	0.390383	13.2776	1.41228	0.0219152	6.9	0.217995	2.14892	5.96816	5.29509	0.293045	1.51661
2000	1079	33.2067	62.6042	0.392194	13.2448	1.41508	0.022027	6.90811	0.219107	2.12699	5.94427	5.30456	0.294376	1.52435
2000	1078	33.0391	62.6502	0.394003	13.2119	1.41787	0.0221387	6.91615	0.220218	2.10524	5.92052	5.31394	0.295704	1.53208
2000	1077	32.8734	62.6962	0.39581	13.179	1.42065	0.0222504	6.92411	0.221328	2.08366	5.89691	5.32324	0.297029	1.5398
2000	1076	32.7093	62.742	0.397616	13.1462	1.42342	0.022362	6.93198	0.222438	2.06227	5.87343	5.33246	0.298353	1.54753
2000	1075	32.547	62.7877	0.399419	13.1133	1.42618	0.0224735	6.93977	0.223548	2.04105	5.85008	5.34159	0.299674	1.55524
2000	1074	32.3864	62.8333	0.40122	13.0804	1.42894	0.0225849	6.94747	0.224657	2.02001	5.82686	5.35064	0.300993	1.56296
2000	1073	32.2272	62.879	0.403011	13.0476	1.43166	0.0225592	6.95492	0.225766	1.9991	5.80377	5.35964	0.302313	1.57068
2000	1072	32.0691	62.9253	0.404784	13.0148	1.43431	0.0222521	6.9619	0.226879	1.97828	5.78081	5.36863	0.303634	1.57842
2000	1071	31.9127	62.9715	0.406553	12.982	1.43695	0.0219459	6.96879	0.227991	1.95764	5.75797	5.37755	0.304953	1.58616
2000	1070	31.7578	63.0176	0.408318	12.9492	1.43957	0.0216405	6.97559	0.229103	1.93717	5.73526	5.38638	0.306271	1.59389
2000	1069	31.6045	63.0636	0.410081	12.9164	1.44219	0.021336	6.98229	0.230214	1.91686	5.71267	5.39514	0.307586	1.60162
2000	1068	31.4528	63.1095	0.411841	12.8836	1.4448	0.0210323	6.98892	0.231325	1.89671	5.69021	5.40382	0.308899	1.60935
2000	1067	31.3025	63.1553	0.413598	12.8508	1.44741	0.0207294	6.99545	0.232435	1.87673	5.66788	5.41242	0.31021	1.61707
2000	1066	31.1538	63.2009	0.415353	12.818	1.45	0.0204273	7.00189	0.233545	1.85691	5.64567	5.42095	0.311519	1.6248
2000	1065	31.0065	63.2465	0.417105	12.7852	1.45258	0.020126	7.00825	0.234654	1.83725	5.62358	5.4294	0.312826	1.63251
2000	1064	30.8606	63.2919	0.418854	12.7524	1.45516	0.0198253	7.01452	0.235764	1.81775	5.60161	5.43777	0.314131	1.64023
2000	1063	30.7162	63.3373	0.4206	12.7197	1.45773	0.0195254	7.0207	0.236872	1.79841	5.57977	5.44607	0.315434	1.64794
2000	1062	30.5732	63.3825	0.422344	12.6869	1.46028	0.0192262	7.02679	0.23798	1.77922	5.55804	5.4543	0.316736	1.65565
2000	1061	30.4315	63.4277	0.424084	12.6541	1.46283	0.0189276	7.03279	0.239088	1.76019	5.53643	5.46245	0.318035	1.66336
2000	1060	30.2912	63.4727	0.425822	12.6214	1.46537	0.0186296	7.0387	0.240196	1.74131	5.51494	5.47053	0.319332	1.67107
2000	1059	30.1522	63.5177	0.427557	12.5886	1.4679	0.0183323	7.04453	0.241303	1.72258	5.49357	5.47854	0.320628	1.67877
2000	1058	30.0145	63.5625	0.429289	12.5559	1.47042	0.0180355	7.05026	0.24241	1.704	5.47231	5.48647	0.321921	1.68647
2000	1057	29.8781	63.6073	0.431018	12.5231	1.47293	0.0177392	7.05589	0.243516	1.68557	5.45117	5.49434	0.323213	1.69417
2000	1056	29.743	63.652	0.432744	12.4904	1.47544	0.0174434	7.06144	0.244623	1.66728	5.43014	5.50214	0.324503	1.70186
2000	1055	29.6091	63.6966	0.434466	12.4577	1.47793	0.0171481	7.0669	0.245728	1.64915	5.40923	5.50987	0.325791	1.70956
2000	1054	29.4765	63.7411	0.436186	12.4249	1.48041	0.0168533	7.07226	0.246834	1.63115	5.38843	5.51753	0.327077	1.71725
2000	1053	29.3451	63.7855	0.437902	12.3922	1.48288	0.0165589	7.07753	0.24794	1.6133	5.36774	5.52512	0.328362	1.72494
2000	1052	29.2149	63.8298	0.439615	12.3595	1.48535	0.0162648	7.0827	0.249045	1.5956	5.34716	5.53264	0.329645	1.73263
2000	1051	29.0858	63.8741	0.441325	12.3268	1.4878	0.0159711	7.08778	0.25015	1.57803	5.32669	5.5401	0.330926	1.74032
2000	1050	28.9579	63.9182	0.443032	12.2942	1.49024	0.0156777	7.09277	0.251255	1.5606	5.30633	5.54749	0.332205	1.748
2000	1049	28.8312	63.9623	0.444735	12.2615	1.49268	0.0153845	7.09766	0.252359	1.54331	5.28608	5.55482	0.333483	1.75569
2000	1048	28.7055	64.0063	0.446434	12.2288	1.4951	0.0150916	7.10245	0.253464	1.52616	5.26594	5.56208	0.334759	1.76337
2000	1047	28.581	64.0503	0.44813	12.1962	1.49751	0.0147989	7.10714	0.254568	1.50914	5.2459	5.56928	0.336034	1.77106
2000	1046	28.4576	64.0941	0.449821	12.1635	1.49991	0.0145064	7.11174	0.255672	1.49226	5.22597	5.57642	0.337306	1.77874
2000	1045	28.3352	64.1379	0.451509	12.1309	1.5023	0.0142139	7.11624	0.256776	1.47551	5.20614	5.58349	0.338578	1.78642
2000	1044	28.2139	64.1816	0.453193	12.0983	1.50468	0.0139216	7.12063	0.25788	1.45889	5.18642	5.5905	0.339847	1.7941
2000	1043	28.0936	64.2253	0.454873	12.0657	1.50705	0.0136294	7.12493	0.258984	1.44241	5.1668	5.59745	0.341115	1.80178
2000	1042	27.9744	64.2689	0.456549	12.0331	1.50941	0.0133371	7.12912	0.260088	1.42606	5.14729	5.60434	0.342382	1.80946
2000	1041	27.8562	64.3124	0.45822	12.0006	1.51175	0.0130449	7.13321	0.261192	1.40983	5.12787	5.61117	0.343647	1.81714
2000	1040	27.739	64.3558	0.459886	11.968	1.51409	0.0127526	7.13719	0.262296	1.39373	5.10856	5.61794	0.34491	1.82482
2000	1039	27.6227	64.3992	0.461548	11.9355	1.51641	0.0124603	7.14107	0.263399	1.37776	5.08934	5.62465	0.346173	1.83249
2000	1038	27.5075	64.4426	0.463205	11.9029	1.51872	0.0121679	7.14484	0.264503	1.36192	5.07023	5.6313	0.347433	1.84017
2000	1037	27.3932	64.4859	0.464856	11.8704	1.52101	0.0118754	7.14851	0.265607	1.3462	5.05121	5.6379	0.348692	1.84785
2000	1036	27.2798	64.5291	0.466502	11.8379	1.5233	0.0115828	7.15206	0.266711	1.3306	5.03229	5.64444	0.34995	1.85553
2000	1035	27.1673	64.5723	0.468143	11.8054	1.52557	0.01129	7.1555	0.267815	1.31512	5.01347	5.65092	0.351207	1.86321
2000	1034	27.0558	64.6154	0.469778	11.773	1.52782	0.0109971	7.15883	0.268919	1.29977	4.99475	5.65735	0.352462	1.87089
2000	1033	26.9452	64.6585	0.471406	11.7405	1.53007	0.010704	7.16205	0.270023	1.28454	4.97611	5.66372	0.353716	1.87858
2000	1032	26.8354	64.7016	0.473029	11.7081	1.5323	0.0104109	7.16515	0.271127	1.26943	4.95758	5.67004	0.354968	1.88626
2000	1031	26.7265	64.7446	0.474644	11.6757	1.53451	0.0101176	7.16814	0.272232	1.25444	4.93914	5.67631	0.35622	1.89394
2000	1030	26.6185	64.7876	0.476253	11.6433	1.53671	0.00982413	7.171	0.273336	1.23957	4.92079	5.68252	0.35747	1.90163
2000	1029	26.5114	64.8305	0.477854	11.6109	1.5389	0.00953062	7.17375	0.274441	1.22481	4.90253	5.68868	0.358719	1.90931
2000	1028	26.4051	64.8735	0.479447	11.5786	1.54107	0.00923707	7.17637	0.275546	1.21017	4.88436	5.69479	0.359966	1.917
2000	1027	26.2996	64.9163	0.481032	11.5463	1.54322	0.00894352	7.17886	0.276651	1.19564	4.86629	5.70085	0.361213	1.92469
2000	1026	26.1949	64.9592	0.482609	11.514	1.54536	0.00865004	7.18124	0.277757	1.18123	4.8483	5.70686	0.362458	1.93238
2000	1025	26.091	65.002	0.484176	11.4817	1.54748	0.00835669	7.18348	0.278863	1.16694	4.8304	5.71281	0.363703	1.94008
2000	1024	25.9879	65.0449	0.485734	11.4494	1.54959	0.00806355	7.18559	0.279969	1.15275	4.81259	5.71872	0.364946	1.94777
2000	1023	25.8856	65.0877	0.487283	11.4171	1.55168	0.00777074	7.18757	0.281076	1.13868	4.79487	5.72459	0.366188	1.95547
2000	1022	25.784	65.1305	0.48882	11.3849	1.55375	0.00747837	7.18942	0.282183	1.12472	4.77724	5.7304	0.36743	1.96317
2000	1021	25.6833	65.1733	0.490347	11.3527	1.5558	0.00718657	7.19113	0.28329	1.11088	4.75969	5.73617	0.36867	1.97088
2000	1020	25.5832	65.2161	0.491862	11.3205	1.55783	0.00689549	7.1927	0.284398	1.09714	4.74222	5.74189	0.369909	1.97858
2000	1019	25.4839	65.2589	0.493365	11.2883	1.55984	0.00660529	7.19412	0.285506	1.08351	4.72484	5.74756	0.371148	1.9863
2000	1018	25.3853	65.3017	0.494855	11.2562	1.56184	0.00631619	7.19541	0.286615	1.06999	4.70755	5.75319	0.372386	1.99401
2000	1017	25.2874	65.3445	0.496332	11.2241	1.56381	0.00602837	7.19654	0.287725	1.05657	4.69033	5.75878	0.373623	2.00173
2000	1016	25.1902	65.3873	0.497794	11.192	1.56577	0.00574208	7.19753	0.288835	1.04327	4.6732	5.76432	0.374859	2.00945
2000	1015	25.0937	65.4301	0.499241	11.1599	1.5677	0.00545757	7.19837	0.289945	1.03007	4.65615	5.76982	0.376095	2.01718
2000	1014	24.9979	65.473	0.500672	11.1278	1.56961	0.00517512	7.19905	0.291057	1.01698	4.63918	5.77528	0.37733	2.02491
2000	1013	24.9028	65.5158	0.502087	11.0958	1.5715	0.00489503	7.19957	0.292169	1.00399	4.62229	5.7807	0.378564	2.03265
2000	1012	24.8083	65.5587	0.503484	11.0637	1.57336	0.00461763	7.19993	0.293281	0.99111	4.60547	5.78607	0.379798	2.04039
2000	1011	24.7145	65.6017	0.504863	11.0318	1.5752	0.00434328	7.20013	0.294395	0.978333	4.58874	5.79141	0.381031	2.04813
2000	1010	24.6213	65.6446	0.506222	10.9998	1.57702	0.00407235	7.20016	0.295509	0.96566	4.57208	5.7967	0.382263	2.05588
2000	1009	24.5287	65.6877	0.507561	10.9678	1.57881	0.00380526	7.20002	0.296624	0.95309	4.5555	5.80196	0.383495	2.06364
2000	1008	24.4368	65.7307	0.508878	10.9359	1.58057	0.00354243	7.19971	0.29774	0.940623	4.53899	5.80717	0.384727	2.07141
2000	1007	24.3455	65.7738	0.510173	10.904	1.58231	0.00328432	7.19922	0.298857	0.928259	4.52256	5.81235	0.385958	2.07917
2000	1006	24.2548	65.817	0.511444	10.8721	1.58402	0.00303141	7.19855	0.299974	0.915997	4.50621	5.8175	0.387189	2.08695
2000	1005	24.1647	65.8602	0.51269	10.8403	1.58571	0.00278422	7.1977	0.301093	0.903837	4.48992	5.8226	0.38842	2.09473
2000	1004	24.0751	65.9035	0.513909	10.8084	1.58736	0.00254329	7.19666	0.302213	0.891778	4.47371	5.82767	0.38965	2.10252
2000	1003	23.9862	65.9469	0.515102	10.7766	1.58899	0.00230917	7.19543	0.303333	0.87982	4.45757	5.83271	0.39088	2.11032
2000	1002	23.8978	65.9903	0.516265	10.7449	1.59058	0.00208245	7.19401	0.304455	0.867963	4.4415	5.83771	0.39211	2.11812
2000	1001	23.81	66.0339	0.517398	10.7131	1.59215	0.00186374	7.19239	0.305578	0.856206	4.42551	5.84268	0.39334	2.12594
2000	1000	23.7227	66.0775	0.518499	10.6814	1.59368	0.00165367	7.19056	0.306702	0.844549	4.40958	5.84762	0.39457	2.13376
2000	999	23.636	66.1212	0.519566	10.6497	1.59518	0.00145289	7.18853	0.307827	0.832993	4.39372	5.85252	0.395799	2.14158
2000	998	23.5498	66.165	0.520598	10.618	1.59664	0.00126207	7.18628	0.308954	0.821535	4.37792	5.85739	0.397029	2.14942
2000	997	23.4642	66.2089	0.521592	10.5863	1.59807	0.0010819	7.18381	0.310082	0.810177	4.3622	5.86223	0.398259	2.15727
2000	996	23.379	66.253	0.522546	10.5547	1.59947	0.000913073	7.18112	0.311211	0.798919	4.34654	5.86704	0.399489	2.16512
2000	995	23.2944	66.2971	0.523458	10.5231	1.60082	0.000756311	7.17819	0.312342	0.78776	4.33094	5.87182	0.400719	2.17299
2000	994	23.2103	66.3415	0.524323	10.4915	1.60213	0.000612333	7.17502	0.313474	0.7767	4.31541	5.87657	0.40195	2.18087
2000	993	23.1266	66.386	0.525138	10.4599	1.6034	0.000481866	7.17159	0.314608	0.765739	4.29994	5.8813	0.403181	2.18876
2000	992	23.0434	66.4306	0.525897	10.4284	1.60462	0.000365636	7.16788	0.315744	0.754879	4.28454	5.88601	0.404413	2.19666
2000	991	22.9607	66.4756	0.526592	10.3968	1.60579	0.000264362	7.16387	0.316882	0.744119	4.26919	5.89069	0.405646	2.20458
2000	990	22.8783	66.5207	0.527211	10.3653	1.6069	0.000178745	7.15951	0.318022	0.733462	4.2539	5.89535	0.40688	2.21251
2000	989	22.7964	66.5663	0.527733	10.3339	1.60793	0.00010945	7.15474	0.319165	0.722909	4.23867	5.9	0.408116	2.22046
2000	988	22.7147	66.6125	0.528114	10.3024	1.60886	5.70691e-05	7.14939	0.320312	0.712468	4.22348	5.90466	0.409356	2.22845
2000	987	22.6331	66.6597	0.528246	10.2709	1.60961	2.20243e-05	7.14309	0.321467	0.702152	4.20832	5.90935	0.410602	2.23648
2000	986	22.5562	66.6969	0.53046	10.2396	1.61179	0	7.14422	0.322563	0.691617	4.19358	5.91333	0.411778	2.24411
2000	985	22.4661	66.7675	0.525653	10.208	1.60913	0	7.12011	0.323858	0.682211	4.17774	5.91953	0.413187	2.25311
2000	984	22.3723	66.8486	0.518629	10.1763	1.60489	0	7.08784	0.325216	0.673245	4.16161	5.92641	0.41467	2.26256
2000	983	22.2793	66.9295	0.511688	10.1446	1.60066	0	7.05566	0.326572	0.664379	4.14557	5.93321	0.416148	2.27199
2000	982	22.1873	67.0101	0.504827	10.113	1.59642	0	7.02358	0.327927	0.655613	4.12962	5.93993	0.417623	2.28142
2000	981	22.0961	67.0904	0.498046	10.0813	1.59218	0	6.9916	0.32928	0.646944	4.11376	5.94658	0.419095	2.29083
2000	980	22.0058	67.1704	0.491344	10.0497	1.58794	0	6.9597	0.330631	0.638372	4.09799	5.95316	0.420563	2.30023
2000	979	21.9163	67.2501	0.48472	10.018	1.5837	0	6.9279	0.331981	0.629896	4.08231	5.95966	0.422027	2.30963
2000	978	21.8277	67.3296	0.478173	9.98643	1.57946	0	6.89619	0.33333	0.621514	4.06672	5.96609	0.423488	2.31901
2000	977	21.7398	67.4088	0.471702	9.95484	1.57522	0	6.86456	0.334677	0.613225	4.05121	5.97244	0.424945	2.32838
2000	976	21.6528	67.4877	0.465307	9.92327	1.57098	0	6.83302	0.336022	0.605028	4.03579	5.97873	0.426398	2.33774
2000	975	21.5665	67.5664	0.458986	9.89172	1.56674	0	6.80157	0.337366	0.596923	4.02045	5.98494	0.427849	2.34709
2000	974	21.481	67.6448	0.452739	9.86018	1.56249	0	6.77021	0.338709	0.588908	4.00519	5.99108	0.429295	2.35643
2000	973	21.3963	67.7229	0.446564	9.82867	1.55825	0	6.73893	0.340049	0.580981	3.99002	5.99716	0.430738	2.36576
2000	972	21.3124	67.8007	0.440462	9.79717	1.554	0	6.70773	0.341389	0.573143	3.97493	6.00316	0.432178	2.37508
2000	971	21.2292	67.8784	0.434431	9.7657	1.54976	0	6.67662	0.342727	0.565392	3.95993	6.0091	0.433615	2.38439
2000	970	21.1467	67.9557	0.428471	9.73425	1.54551	0	6.64559	0.344064	0.557726	3.945	6.01497	0.435048	2.39368
2000	969	21.065	68.0328	0.42258	9.70281	1.54126	0	6.61464	0.345399	0.550146	3.93015	6.02077	0.436477	2.40297
2000	968	20.9839	68.1096	0.416759	9.6714	1.53701	0	6.58378	0.346733	0.54265	3.91538	6.02651	0.437903	2.41225
2000	967	20.9036	68.1862	0.411005	9.64002	1.53275	0	6.55299	0.348065	0.535237	3.90069	6.03218	0.439326	2.42152
2000	966	20.824	68.2626	0.40532	9.60866	1.5285	0	6.52228	0.349396	0.527906	3.88607	6.03778	0.440746	2.43078
2000	965	20.745	68.3387	0.399701	9.57732	1.52424	0	6.49165	0.350725	0.520657	3.87153	6.04332	0.442162	2.44003
2000	964	20.6668	68.4145	0.394148	9.546	1.51998	0	6.4611	0.352053	0.513487	3.85707	6.0488	0.443575	2.44927
2000	963	20.5892	68.4901	0.38866	9.51471	1.51572	0	6.43063	0.35338	0.506398	3.84268	6.05421	0.444984	2.4585
2000	962	20.5123	68.5655	0.383237	9.48345	1.51145	0	6.40023	0.354705	0.499387	3.82837	6.05956	0.446391	2.46772
2000	961	20.436	68.6406	0.377878	9.45221	1.50718	0	6.36991	0.356029	0.492454	3.81413	6.06485	0.447794	2.47693
2000	960	20.3603	68.7155	0.372583	9.421	1.50292	0	6.33966	0.357352	0.485597	3.79996	6.07008	0.449193	2.48613
2000	959	20.2853	68.7902	0.36735	9.38982	1.49864	0	6.30949	0.358673	0.478817	3.78586	6.07524	0.45059	2.49532
2000	958	20.211	68.8646	0.362179	9.35866	1.49437	0	6.27939	0.359993	0.472112	3.77183	6.08035	0.451983	2.50451
2000	957	20.1372	68.9388	0.35707	9.32753	1.49009	0	6.24937	0.361312	0.465482	3.75788	6.08539	0.453373	2.51368
2000	956	20.0641	69.0128	0.352021	9.29643	1.48581	0	6.21942	0.362629	0.458926	3.74399	6.09038	0.45476	2.52284
2000	955	19.9915	69.0865	0.347033	9.26535	1.48153	0	6.18954	0.363945	0.452442	3.73017	6.0953	0.456144	2.532
2000	954	19.9196	69.1601	0.342104	9.23431	1.47724	0	6.15974	0.365259	0.446031	3.71643	6.10017	0.457524	2.54114
2000	953	19.8482	69.2333	0.337234	9.2033	1.47295	0	6.13	0.366572	0.439691	3.70274	6.10498	0.458902	2.55028
2000	952	19.7775	69.3064	0.332422	9.17231	1.46866	0	6.10034	0.367884	0.433421	3.68913	6.10973	0.460276	2.55941
2000	951	19.7072	69.3793	0.327668	9.14136	1.46437	0	6.07075	0.369195	0.427222	3.67558	6.11442	0.461647	2.56852
2000	950	19.6376	69.4519	0.322971	9.11044	1.46007	0	6.04123	0.370504	0.421092	3.6621	6.11906	0.463014	2.57763
2000	949	19.5685	69.5243	0.31833	9.07955	1.45577	0	6.01178	0.371812	0.41503	3.64868	6.12364	0.464379	2.58673
2000	948	19.5	69.5965	0.313745	9.04869	1.45146	0	5.9824	0.373118	0.409037	3.63532	6.12817	0.465741	2.59582
2000	947	19.432	69.6685	0.309216	9.01786	1.44715	0	5.95308	0.374424	0.40311	3.62203	6.13264	0.467099	2.6049
2000	946	19.3646	69.7402	0.304742	8.98706	1.44284	0	5.92384	0.375728	0.39725	3.6088	6.13705	0.468455	2.61397
2000	945	19.2977	69.8118	0.300321	8.9563	1.43853	0	5.89467	0.37703	0.391455	3.59564	6.14141	0.469807	2.62304
2000	944	19.2313	69.8831	0.295955	8.92557	1.43421	0	5.86556	0.378332	0.385726	3.58253	6.14572	0.471156	2.63209
2000	943	19.1654	69.9543	0.291641	8.89488	1.42989	0	5.83652	0.379632	0.380061	3.56949	6.14998	0.472502	2.64114
2000	942	19.1001	70.0252	0.287381	8.86421	1.42556	0	5.80755	0.380931	0.37446	3.5565	6.15418	0.473845	2.65017
2000	941	19.0352	70.0959	0.283172	8.83359	1.42124	0	5.77865	0.382228	0.368923	3.54358	6.15833	0.475185	2.6592
2000	940	18.9709	70.1664	0.279015	8.803	1.4169	0	5.74981	0.383525	0.363448	3.53071	6.16242	0.476522	2.66822
2000	939	18.9071	70.2367	0.274909	8.77244	1.41257	0	5.72104	0.38482	0.358034	3.51791	6.16647	0.477856	2.67723
2000	938	18.8437	70.3068	0.270853	8.74192	1.40823	0	5.69234	0.386113	0.352683	3.50516	6.17046	0.479187	2.68623
2000	937	18.7808	70.3767	0.266848	8.71143	1.40389	0	5.6637	0.387406	0.347392	3.49246	6.1744	0.480515	2.69522
2000	936	18.7185	70.4464	0.262892	8.68098	1.39954	0	5.63513	0.388697	0.342161	3.47983	6.1783	0.481839	2.7042
2000	935	18.6565	70.5159	0.258985	8.65057	1.39519	0	5.60663	0.389987	0.336989	3.46725	6.18214	0.483161	2.71318
2000	934	18.5951	70.5852	0.255127	8.62019	1.39083	0	5.57819	0.391276	0.331877	3.45473	6.18593	0.48448	2.72214
2000	933	18.5341	70.6543	0.251317	8.58985	1.38648	0	5.54982	0.392563	0.326824	3.44226	6.18967	0.485796	2.7311
2000	932	18.4736	70.7232	0.247554	8.55955	1.38212	0	5.52151	0.393849	0.321828	3.42984	6.19337	0.487108	2.74005
2000	931	18.4135	70.7919	0.243838	8.52929	1.37775	0	5.49327	0.395134	0.316889	3.41748	6.19701	0.488418	2.74898
2000	930	18.3539	70.8604	0.240169	8.49906	1.37338	0	5.4651	0.396417	0.312008	3.40517	6.20061	0.489725	2.75791
2000	929	18.2947	70.9288	0.236547	8.46888	1.36901	0	5.43699	0.3977	0.307182	3.39292	6.20416	0.491029	2.76684
2000	928	18.236	70.9969	0.232969	8.43873	1.36463	0	5.40894	0.398981	0.302413	3.38071	6.20766	0.492329	2.77575
2000	927	18.1777	71.0648	0.229438	8.40862	1.36025	0	5.38096	0.40026	0.297698	3.36856	6.21112	0.493627	2.78465
2000	926	18.1198	71.1326	0.225951	8.37855	1.35587	0	5.35304	0.401539	0.293039	3.35646	6.21453	0.494922	2.79354
2000	925	18.0624	71.2001	0.222508	8.34852	1.35148	0	5.32519	0.402816	0.288433	3.34441	6.21789	0.496214	2.80243
2000	924	18.0053	71.2675	0.219109	8.31853	1.34709	0	5.29741	0.404092	0.283881	3.33241	6.22121	0.497502	2.81131
2000	923	17.9487	71.3346	0.215754	8.28858	1.3427	0	5.26969	0.405366	0.279383	3.32046	6.22448	0.498788	2.82017
2000	922	17.8925	71.4016	0.212441	8.25868	1.3383	0	5.24203	0.40664	0.274937	3.30855	6.2277	0.500071	2.82903
2000	921	17.8367	71.4684	0.209172	8.22881	1.3339	0	5.21444	0.407912	0.270544	3.2967	6.23089	0.501351	2.83788
2000	920	17.7813	71.535	0.205944	8.19898	1.32949	0	5.18692	0.409183	0.266202	3.28489	6.23402	0.502628	2.84672
2000	919	17.7263	71.6014	0.202758	8.1692	1.32508	0	5.15945	0.410452	0.261911	3.27313	6.23711	0.503902	2.85556
2000	918	17.6717	71.6677	0.199614	8.13946	1.32067	0	5.13206	0.41172	0.257671	3.26142	6.24016	0.505173	2.86438
2000	917	17.6175	71.7337	0.19651	8.10976	1.31626	0	5.10473	0.412987	0.253482	3.24976	6.24317	0.506441	2.87319
2000	916	17.5637	71.7996	0.193447	8.0801	1.31184	0	5.07746	0.414253	0.249343	3.23814	6.24613	0.507706	2.882
2000	915	17.5102	71.8653	0.190424	8.05049	1.30741	0	5.05026	0.415517	0.245253	3.22656	6.24904	0.508968	2.89079
2000	914	17.4572	71.9308	0.187441	8.02092	1.30299	0	5.02312	0.41678	0.241212	3.21503	6.25192	0.510228	2.89958
2000	913	17.4045	71.9961	0.184497	7.99139	1.29856	0	4.99605	0.418042	0.237219	3.20354	6.25475	0.511484	2.90836
2000	912	17.3522	72.0612	0.181592	7.96191	1.29412	0	4.96904	0.419303	0.233275	3.1921	6.25754	0.512737	2.91713
2000	911	17.3002	72.1262	0.178725	7.93247	1.28969	0	4.9421	0.420562	0.229379	3.1807	6.26029	0.513988	2.92589
2000	910	17.2486	72.191	0.175897	7.90307	1.28525	0	4.91522	0.42182	0.225529	3.16935	6.263	0.515235	2.93464
2000	909	17.1974	72.2556	0.173106	7.87372	1.2808	0	4.88841	0.423076	0.221727	3.15804	6.26567	0.51648	2.94338
2000	908	17.1465	72.32	0.170353	7.84441	1.27636	0	4.86167	0.424331	0.217971	3.14676	6.26829	0.517721	2.95212
2000	907	17.096	72.3843	0.167636	7.81515	1.27191	0	4.83499	0.425585	0.214261	3.13554	6.27088	0.51896	2.96084
2000	906	17.0458	72.4483	0.164956	7.78593	1.26745	0	4.80837	0.426838	0.210597	3.12435	6.27342	0.520196	2.96955
2000	905	16.996	72.5122	0.162312	7.75676	1.263	0	4.78182	0.428089	0.206978	3.1132	6.27592	0.521429	2.97826
2000	904	16.9465	72.5759	0.159704	7.72763	1.25854	0	4.75534	0.429339	0.203404	3.10209	6.27839	0.522658	2.98696
2000	903	16.8974	72.6395	0.157132	7.69855	1.25408	0	4.72892	0.430588	0.199874	3.09103	6.28081	0.523885	2.99564
2000	902	16.8486	72.7029	0.154594	7.66952	1.24961	0	4.70257	0.431835	0.196388	3.08	6.2832	0.525109	3.00432
2000	901	16.8001	72.766	0.152091	7.64053	1.24515	0	4.67629	0.433081	0.192946	3.06901	6.28555	0.52633	3.01299
2000	900	16.752	72.8291	0.149623	7.61159	1.24068	0	4.65007	0.434326	0.189547	3.05806	6.28785	0.527548	3.02165
Title:	R-magma	-	mresidual	from	MZ-magma	at	T	=	1145	C
liquid_0	thermodynamic	data	and	composition:
Pressure	Temperature	mass	S	H	V	Cp	viscosity	SiO2	TiO2	Al2O3	Fe2O3	Cr2O3	FeO	MnO	MgO	CaO	Na2O	K2O	H2O	Mg#
2000	1400	99.9994	291.451	-1.24102e+06	39.4602	151.163	2.11	55.561	0.141801	17.5424	0.872668	0.00731448	4.91701	0.0727585	7.1692	9.88343	3.21948	0.106711	0.506188	72.2
2000	1400	99.9994	291.451	-1.24102e+06	39.4602	151.163	2.11	55.561	0.141801	17.5424	0.872668	0.00731448	4.91701	0.0727585	7.1692	9.88343	3.21948	0.106711	0.506188	72.2
2000	1399	99.9995	291.36	-1.24117e+06	39.4574	151.162	2.114	55.561	0.141801	17.5424	0.872769	0.00731448	4.91692	0.0727585	7.1692	9.88343	3.21948	0.106711	0.506188	72.2
2000	1398	99.9995	291.27	-1.24132e+06	39.4546	151.162	2.118	55.561	0.141801	17.5424	0.872871	0.00731448	4.91683	0.0727585	7.1692	9.88343	3.21948	0.106711	0.506188	72.2
2000	1397	99.9995	291.18	-1.24147e+06	39.4518	151.162	2.122	55.561	0.141801	17.5424	0.872974	0.00731448	4.91673	0.0727585	7.1692	9.88343	3.21948	0.106711	0.506188	72.2
2000	1396	99.9995	291.089	-1.24163e+06	39.449	151.162	2.126	55.561	0.141801	17.5424	0.873078	0.00731448	4.91664	0.0727585	7.1692	9.88342	3.21948	0.106711	0.506188	72.2
2000	1395	99.9995	290.998	-1.24178e+06	39.4463	151.162	2.13	55.561	0.141801	17.5424	0.873183	0.00731448	4.91654	0.0727585	7.1692	9.88342	3.21948	0.106711	0.506188	72.2
2000	1394	99.9995	290.908	-1.24193e+06	39.4435	151.162	2.134	55.561	0.141801	17.5424	0.873289	0.00731448	4.91645	0.0727585	7.1692	9.88342	3.21948	0.106711	0.506188	72.2
2000	1393	99.9995	290.817	-1.24208e+06	39.4407	151.161	2.138	55.561	0.141801	17.5424	0.873397	0.00731448	4.91635	0.0727584	7.1692	9.88342	3.21947	0.106711	0.506188	72.2
2000	1392	99.9995	290.726	-1.24223e+06	39.4379	151.161	2.142	55.561	0.141801	17.5424	0.873505	0.00731448	4.91625	0.0727584	7.1692	9.88342	3.21947	0.106711	0.506188	72.2
2000	1391	99.9995	290.636	-1.24238e+06	39.4351	151.161	2.146	55.561	0.141801	17.5424	0.873614	0.00731448	4.91615	0.0727584	7.1692	9.88342	3.21947	0.106711	0.506188	72.2
2000	1390	99.9996	290.545	-1.24253e+06	39.4323	151.161	2.149	55.561	0.141801	17.5424	0.873725	0.00731448	4.91605	0.0727584	7.1692	9.88342	3.21947	0.106711	0.506187	72.2
2000	1389	99.9996	290.454	-1.24269e+06	39.4296	151.161	2.153	55.5609	0.141801	17.5424	0.873836	0.00731448	4.91595	0.0727584	7.1692	9.88342	3.21947	0.106711	0.506187	72.2
2000	1388	99.9996	290.363	-1.24284e+06	39.4268	151.16	2.157	55.5609	0.141801	17.5424	0.873949	0.00731447	4.91585	0.0727584	7.1692	9.88342	3.21947	0.106711	0.506187	72.2
2000	1387	99.9996	290.272	-1.24299e+06	39.424	151.16	2.161	55.5609	0.141801	17.5424	0.874062	0.00731447	4.91575	0.0727584	7.16919	9.88342	3.21947	0.106711	0.506187	72.2
2000	1386	99.9996	290.181	-1.24314e+06	39.4212	151.16	2.165	55.5609	0.141801	17.5424	0.874177	0.00731447	4.91564	0.0727584	7.16919	9.88341	3.21947	0.106711	0.506187	72.2
2000	1385	99.9996	290.09	-1.24329e+06	39.4184	151.16	2.169	55.5609	0.141801	17.5424	0.874293	0.00731447	4.91554	0.0727584	7.16919	9.88341	3.21947	0.106711	0.506187	72.2
2000	1384	99.9996	289.999	-1.24344e+06	39.4157	151.16	2.173	55.5609	0.141801	17.5424	0.874409	0.00731447	4.91543	0.0727584	7.16919	9.88341	3.21947	0.106711	0.506187	72.2
2000	1383	99.9996	289.907	-1.24359e+06	39.4129	151.16	2.177	55.5609	0.141801	17.5424	0.874527	0.00731447	4.91533	0.0727584	7.16919	9.88341	3.21947	0.106711	0.506187	72.2
2000	1382	99.9996	289.816	-1.24374e+06	39.4101	151.159	2.181	55.5609	0.141801	17.5424	0.874646	0.00731447	4.91522	0.0727584	7.16919	9.88341	3.21947	0.106711	0.506187	72.2
2000	1381	99.9997	289.725	-1.2439e+06	39.4073	151.159	2.185	55.5609	0.141801	17.5424	0.874766	0.00731447	4.91511	0.0727583	7.16919	9.88341	3.21947	0.106711	0.506187	72.2
2000	1380	99.9997	289.633	-1.24405e+06	39.4045	151.159	2.189	55.5609	0.141801	17.5424	0.874887	0.00731447	4.915	0.0727583	7.16919	9.88341	3.21947	0.106711	0.506187	72.2
2000	1379	99.9997	289.542	-1.2442e+06	39.4017	151.159	2.193	55.5609	0.141801	17.5424	0.87501	0.00731447	4.91489	0.0727583	7.16919	9.88341	3.21947	0.106711	0.506187	72.2
2000	1378	99.9997	289.451	-1.24435e+06	39.399	151.159	2.197	55.5609	0.141801	17.5424	0.875133	0.00731447	4.91478	0.0727583	7.16919	9.8834	3.21947	0.106711	0.506187	72.2
2000	1377	99.9997	289.359	-1.2445e+06	39.3962	151.158	2.201	55.5609	0.141801	17.5424	0.875257	0.00731447	4.91467	0.0727583	7.16919	9.8834	3.21947	0.106711	0.506187	72.2
2000	1376	99.9997	289.267	-1.24465e+06	39.3934	151.158	2.205	55.5609	0.141801	17.5424	0.875383	0.00731446	4.91455	0.0727583	7.16919	9.8834	3.21947	0.106711	0.506187	72.2
2000	1375	99.9997	289.176	-1.2448e+06	39.3906	151.158	2.209	55.5609	0.141801	17.5424	0.87551	0.00731446	4.91444	0.0727583	7.16918	9.8834	3.21947	0.106711	0.506187	72.2
2000	1374	99.9997	289.084	-1.24496e+06	39.3878	151.158	2.213	55.5608	0.141801	17.5424	0.875637	0.00731446	4.91432	0.0727583	7.16918	9.8834	3.21947	0.106711	0.506187	72.2
2000	1373	99.9998	288.992	-1.24511e+06	39.3851	151.158	2.217	55.5608	0.141801	17.5424	0.875766	0.00731446	4.9142	0.0727583	7.16918	9.8834	3.21947	0.106711	0.506186	72.2
2000	1372	99.9998	288.9	-1.24526e+06	39.3823	151.158	2.221	55.5608	0.141801	17.5424	0.875896	0.00731446	4.91409	0.0727583	7.16918	9.8834	3.21947	0.106711	0.506186	72.2
2000	1371	99.9998	288.809	-1.24541e+06	39.3795	151.157	2.225	55.5608	0.141801	17.5424	0.876027	0.00731446	4.91397	0.0727583	7.16918	9.8834	3.21947	0.106711	0.506186	72.2
2000	1370	99.9998	288.717	-1.24556e+06	39.3767	151.157	2.229	55.5608	0.141801	17.5424	0.876159	0.00731446	4.91385	0.0727582	7.16918	9.88339	3.21947	0.106711	0.506186	72.2
2000	1369	99.9998	288.625	-1.24571e+06	39.374	151.157	2.233	55.5608	0.141801	17.5424	0.876292	0.00731446	4.91373	0.0727582	7.16918	9.88339	3.21947	0.106711	0.506186	72.2
2000	1368	99.9998	288.533	-1.24586e+06	39.3712	151.157	2.238	55.5608	0.141801	17.5424	0.876427	0.00731446	4.91361	0.0727582	7.16918	9.88339	3.21946	0.106711	0.506186	72.2
2000	1367	99.9998	288.441	-1.24601e+06	39.3684	151.157	2.242	55.5608	0.141801	17.5424	0.876562	0.00731446	4.91348	0.0727582	7.16918	9.88339	3.21946	0.106711	0.506186	72.2
2000	1366	99.9999	288.348	-1.24617e+06	39.3656	151.157	2.246	55.5608	0.141801	17.5424	0.876699	0.00731445	4.91336	0.0727582	7.16918	9.88339	3.21946	0.106711	0.506186	72.2
2000	1365	99.9999	288.256	-1.24632e+06	39.3628	151.156	2.25	55.5608	0.141801	17.5424	0.876837	0.00731445	4.91324	0.0727582	7.16917	9.88339	3.21946	0.106711	0.506186	72.2
2000	1364	99.9999	288.164	-1.24647e+06	39.3601	151.156	2.254	55.5608	0.141801	17.5424	0.876976	0.00731445	4.91311	0.0727582	7.16917	9.88339	3.21946	0.106711	0.506186	72.2
2000	1363	99.9999	288.072	-1.24662e+06	39.3573	151.156	2.258	55.5608	0.141801	17.5423	0.877116	0.00731445	4.91298	0.0727582	7.16917	9.88338	3.21946	0.106711	0.506186	72.2
2000	1362	99.9999	287.979	-1.24677e+06	39.3545	151.156	2.262	55.5608	0.141801	17.5423	0.877257	0.00731445	4.91285	0.0727582	7.16917	9.88338	3.21946	0.106711	0.506186	72.2
2000	1361	99.9999	287.887	-1.24692e+06	39.3517	151.156	2.266	55.5607	0.141801	17.5423	0.877399	0.00731445	4.91273	0.0727582	7.16917	9.88338	3.21946	0.106711	0.506186	72.2
2000	1360	99.9999	287.794	-1.24707e+06	39.349	151.156	2.27	55.5607	0.141801	17.5423	0.877543	0.00731445	4.9126	0.0727581	7.16917	9.88338	3.21946	0.106711	0.506186	72.2
2000	1359	99.9999	287.702	-1.24723e+06	39.3462	151.155	2.274	55.5607	0.141801	17.5423	0.877687	0.00731445	4.91246	0.0727581	7.16917	9.88338	3.21946	0.106711	0.506185	72.2
2000	1358	100	287.609	-1.24738e+06	39.3434	151.155	2.278	55.5607	0.141801	17.5423	0.877833	0.00731445	4.91233	0.0727581	7.16917	9.88338	3.21946	0.106711	0.506185	72.2
2000	1357	100	287.516	-1.24753e+06	39.3406	151.155	2.282	55.5607	0.141801	17.5423	0.87798	0.00731445	4.9122	0.0727581	7.16917	9.88338	3.21946	0.106711	0.506185	72.2
2000	1356	100	287.424	-1.24768e+06	39.3378	151.155	2.287	55.5607	0.141801	17.5423	0.878128	0.00731444	4.91207	0.0727581	7.16917	9.88337	3.21946	0.106711	0.506185	72.2
2000	1355	100	287.331	-1.24783e+06	39.3351	151.155	2.291	55.5607	0.141801	17.5423	0.878277	0.00731444	4.91193	0.0727581	7.16916	9.88337	3.21946	0.106711	0.506185	72.2
2000	1354	100	287.238	-1.24798e+06	39.3323	151.155	2.295	55.5607	0.141801	17.5423	0.878428	0.00731444	4.91179	0.0727581	7.16916	9.88337	3.21946	0.106711	0.506185	72.2
2000	1353	100	287.145	-1.24813e+06	39.3295	151.154	2.299	55.5607	0.141801	17.5423	0.878579	0.00731444	4.91166	0.0727581	7.16916	9.88337	3.21946	0.106711	0.506185	72.2
2000	1352	100	287.052	-1.24828e+06	39.3267	151.154	2.303	55.5607	0.1418	17.5423	0.878732	0.00731444	4.91152	0.0727581	7.16916	9.88337	3.21946	0.106711	0.506185	72.2
2000	1351	100	286.959	-1.24844e+06	39.324	151.154	2.307	55.5607	0.1418	17.5423	0.878886	0.00731444	4.91138	0.072758	7.16916	9.88337	3.21946	0.106711	0.506185	72.2
2000	1350	100	286.866	-1.24859e+06	39.3212	151.154	2.311	55.5607	0.1418	17.5423	0.879041	0.00731444	4.91124	0.072758	7.16916	9.88337	3.21946	0.106711	0.506185	72.2
2000	1349	100	286.773	-1.24874e+06	39.3184	151.154	2.315	55.5606	0.1418	17.5423	0.879198	0.00731444	4.9111	0.072758	7.16916	9.88336	3.21946	0.106711	0.506185	72.2
2000	1348	100	286.68	-1.24889e+06	39.3156	151.154	2.32	55.5606	0.1418	17.5423	0.879355	0.00731444	4.91095	0.072758	7.16916	9.88336	3.21946	0.106711	0.506185	72.2
2000	1347	100	286.587	-1.24904e+06	39.3129	151.154	2.324	55.5606	0.1418	17.5423	0.879514	0.00731443	4.91081	0.072758	7.16916	9.88336	3.21945	0.106711	0.506185	72.2
2000	1346	100	286.493	-1.24919e+06	39.3101	151.153	2.328	55.5606	0.1418	17.5423	0.879673	0.00731443	4.91067	0.072758	7.16915	9.88336	3.21945	0.106711	0.506184	72.2
2000	1345	100	286.4	-1.24934e+06	39.3073	151.153	2.332	55.5606	0.1418	17.5423	0.879835	0.00731443	4.91052	0.072758	7.16915	9.88336	3.21945	0.106711	0.506184	72.2
2000	1344	100	286.307	-1.2495e+06	39.3045	151.153	2.336	55.5606	0.1418	17.5423	0.879997	0.00731443	4.91037	0.072758	7.16915	9.88336	3.21945	0.106711	0.506184	72.2
2000	1343	100	286.213	-1.24965e+06	39.3018	151.153	2.34	55.5606	0.1418	17.5423	0.88016	0.00731443	4.91023	0.072758	7.16915	9.88335	3.21945	0.106711	0.506184	72.2
2000	1342	100	286.12	-1.2498e+06	39.299	151.153	2.345	55.5606	0.1418	17.5423	0.880325	0.00731443	4.91008	0.0727579	7.16915	9.88335	3.21945	0.106711	0.506184	72.2
2000	1341	100	286.026	-1.24995e+06	39.2962	151.153	2.349	55.5606	0.1418	17.5423	0.880491	0.00731443	4.90993	0.0727579	7.16915	9.88335	3.21945	0.106711	0.506184	72.2
2000	1340	100	285.932	-1.2501e+06	39.2935	151.152	2.353	55.5606	0.1418	17.5423	0.880658	0.00731443	4.90978	0.0727579	7.16915	9.88335	3.21945	0.106711	0.506184	72.2
2000	1339	100	285.839	-1.25025e+06	39.2907	151.152	2.357	55.5606	0.1418	17.5423	0.880826	0.00731442	4.90962	0.0727579	7.16915	9.88335	3.21945	0.106711	0.506184	72.2
2000	1338	100	285.745	-1.2504e+06	39.2879	151.152	2.361	55.5605	0.1418	17.5423	0.880996	0.00731442	4.90947	0.0727579	7.16914	9.88335	3.21945	0.106711	0.506184	72.2
2000	1337	100	285.651	-1.25056e+06	39.2851	151.152	2.366	55.5605	0.1418	17.5423	0.881166	0.00731442	4.90931	0.0727579	7.16914	9.88334	3.21945	0.106711	0.506184	72.2
2000	1336	100	285.557	-1.25071e+06	39.2824	151.152	2.37	55.5605	0.1418	17.5423	0.881338	0.00731442	4.90916	0.0727579	7.16914	9.88334	3.21945	0.106711	0.506184	72.2
2000	1335	100	285.463	-1.25086e+06	39.2796	151.152	2.374	55.5605	0.1418	17.5423	0.881511	0.00731442	4.909	0.0727579	7.16914	9.88334	3.21945	0.106711	0.506184	72.2
2000	1334	100	285.369	-1.25101e+06	39.2768	151.152	2.378	55.5605	0.1418	17.5423	0.881686	0.00731442	4.90884	0.0727578	7.16914	9.88334	3.21945	0.106711	0.506183	72.2
2000	1333	100	285.275	-1.25116e+06	39.274	151.151	2.383	55.5605	0.1418	17.5423	0.881861	0.00731442	4.90869	0.0727578	7.16914	9.88334	3.21945	0.10671	0.506183	72.2
2000	1332	100	285.181	-1.25131e+06	39.2713	151.151	2.387	55.5605	0.1418	17.5423	0.882038	0.00731442	4.90853	0.0727578	7.16914	9.88334	3.21945	0.10671	0.506183	72.2
2000	1331	100	285.087	-1.25146e+06	39.2685	151.151	2.391	55.5605	0.1418	17.5423	0.882216	0.00731441	4.90836	0.0727578	7.16914	9.88333	3.21945	0.10671	0.506183	72.2
2000	1330	100	284.993	-1.25162e+06	39.2657	151.151	2.395	55.5605	0.1418	17.5423	0.882396	0.00731441	4.9082	0.0727578	7.16913	9.88333	3.21945	0.10671	0.506183	72.2
2000	1329	100	284.899	-1.25177e+06	39.263	151.151	2.4	55.5605	0.1418	17.5423	0.882576	0.00731441	4.90804	0.0727578	7.16913	9.88333	3.21945	0.10671	0.506183	72.2
2000	1328	100	284.804	-1.25192e+06	39.2602	151.151	2.404	55.5604	0.1418	17.5423	0.882758	0.00731441	4.90787	0.0727578	7.16913	9.88333	3.21944	0.10671	0.506183	72.2
2000	1327	100	284.71	-1.25207e+06	39.2574	151.151	2.408	55.5604	0.1418	17.5422	0.882941	0.00731441	4.90771	0.0727578	7.16913	9.88333	3.21944	0.10671	0.506183	72.2
2000	1326	100	284.616	-1.25222e+06	39.2547	151.15	2.412	55.5604	0.1418	17.5422	0.883126	0.00731441	4.90754	0.0727577	7.16913	9.88333	3.21944	0.10671	0.506183	72.2
2000	1325	100.001	284.521	-1.25237e+06	39.2519	151.15	2.417	55.5604	0.1418	17.5422	0.883311	0.00731441	4.90737	0.0727577	7.16913	9.88332	3.21944	0.10671	0.506183	72.2
2000	1324	100.001	284.426	-1.25252e+06	39.2491	151.15	2.421	55.5604	0.1418	17.5422	0.883498	0.0073144	4.9072	0.0727577	7.16913	9.88332	3.21944	0.10671	0.506183	72.2
2000	1323	100.001	284.332	-1.25268e+06	39.2463	151.15	2.425	55.5604	0.1418	17.5422	0.883686	0.0073144	4.90703	0.0727577	7.16913	9.88332	3.21944	0.10671	0.506182	72.3
2000	1322	100.001	284.237	-1.25283e+06	39.2436	151.15	2.429	55.5604	0.1418	17.5422	0.883876	0.0073144	4.90686	0.0727577	7.16912	9.88332	3.21944	0.10671	0.506182	72.3
2000	1321	100.001	284.142	-1.25298e+06	39.2408	151.15	2.434	55.5604	0.1418	17.5422	0.884067	0.0073144	4.90669	0.0727577	7.16912	9.88332	3.21944	0.10671	0.506182	72.3
2000	1320	100.001	284.048	-1.25313e+06	39.238	151.15	2.438	55.5604	0.1418	17.5422	0.884259	0.0073144	4.90651	0.0727577	7.16912	9.88331	3.21944	0.10671	0.506182	72.3
2000	1319	100.001	283.953	-1.25328e+06	39.2353	151.149	2.442	55.5604	0.1418	17.5422	0.884452	0.0073144	4.90634	0.0727576	7.16912	9.88331	3.21944	0.10671	0.506182	72.3
2000	1318	100.001	283.858	-1.25343e+06	39.2325	151.149	2.447	55.5603	0.1418	17.5422	0.884646	0.0073144	4.90616	0.0727576	7.16912	9.88331	3.21944	0.10671	0.506182	72.3
2000	1317	100.001	283.763	-1.25358e+06	39.2297	151.149	2.451	55.5603	0.1418	17.5422	0.884842	0.0073144	4.90599	0.0727576	7.16912	9.88331	3.21944	0.10671	0.506182	72.3
2000	1316	100.001	283.668	-1.25374e+06	39.227	151.149	2.455	55.5603	0.1418	17.5422	0.885039	0.00731439	4.90581	0.0727576	7.16912	9.88331	3.21944	0.10671	0.506182	72.3
2000	1315	100.001	283.573	-1.25389e+06	39.2242	151.149	2.46	55.5603	0.1418	17.5422	0.885238	0.00731439	4.90563	0.0727576	7.16911	9.8833	3.21944	0.10671	0.506182	72.3
2000	1314	100.001	283.478	-1.25404e+06	39.2214	151.149	2.464	55.5603	0.1418	17.5422	0.885438	0.00731439	4.90545	0.0727576	7.16911	9.8833	3.21944	0.10671	0.506182	72.3
2000	1313	100.001	283.382	-1.25419e+06	39.2187	151.149	2.468	55.5603	0.141799	17.5422	0.885639	0.00731439	4.90526	0.0727576	7.16911	9.8833	3.21944	0.10671	0.506181	72.3
2000	1312	100.001	283.287	-1.25434e+06	39.2159	151.149	2.473	55.5603	0.141799	17.5422	0.885841	0.00731439	4.90508	0.0727575	7.16911	9.8833	3.21943	0.10671	0.506181	72.3
2000	1311	100.001	283.192	-1.25449e+06	39.2131	151.148	2.477	55.5603	0.141799	17.5422	0.886045	0.00731439	4.9049	0.0727575	7.16911	9.8833	3.21943	0.10671	0.506181	72.3
2000	1310	100.001	283.096	-1.25464e+06	39.2104	151.148	2.481	55.5603	0.141799	17.5422	0.88625	0.00731438	4.90471	0.0727575	7.16911	9.88329	3.21943	0.10671	0.506181	72.3
2000	1309	100.001	283.001	-1.2548e+06	39.2076	151.148	2.486	55.5602	0.141799	17.5422	0.886456	0.00731438	4.90452	0.0727575	7.16911	9.88329	3.21943	0.10671	0.506181	72.3
2000	1308	100.001	282.905	-1.25495e+06	39.2048	151.148	2.49	55.5602	0.141799	17.5422	0.886664	0.00731438	4.90434	0.0727575	7.1691	9.88329	3.21943	0.10671	0.506181	72.3
2000	1307	100.001	282.81	-1.2551e+06	39.2021	151.148	2.494	55.5602	0.141799	17.5422	0.886873	0.00731438	4.90415	0.0727575	7.1691	9.88329	3.21943	0.10671	0.506181	72.3
2000	1306	100.001	282.714	-1.25525e+06	39.1993	151.148	2.499	55.5602	0.141799	17.5422	0.887083	0.00731438	4.90396	0.0727574	7.1691	9.88329	3.21943	0.10671	0.506181	72.3
2000	1305	100.001	282.618	-1.2554e+06	39.1965	151.148	2.503	55.5602	0.141799	17.5422	0.887295	0.00731438	4.90377	0.0727574	7.1691	9.88328	3.21943	0.10671	0.506181	72.3
2000	1304	100.001	282.523	-1.25555e+06	39.1938	151.148	2.508	55.5602	0.141799	17.5422	0.887508	0.00731438	4.90357	0.0727574	7.1691	9.88328	3.21943	0.10671	0.50618	72.3
2000	1303	100.001	282.427	-1.2557e+06	39.191	151.147	2.512	55.5602	0.141799	17.5422	0.887722	0.00731437	4.90338	0.0727574	7.1691	9.88328	3.21943	0.10671	0.50618	72.3
2000	1302	100.001	282.331	-1.25586e+06	39.1882	151.147	2.516	55.5602	0.141799	17.5422	0.887938	0.00731437	4.90318	0.0727574	7.1691	9.88328	3.21943	0.10671	0.50618	72.3
2000	1301	100.001	282.235	-1.25601e+06	39.1855	151.147	2.521	55.5601	0.141799	17.5422	0.888155	0.00731437	4.90299	0.0727574	7.16909	9.88328	3.21943	0.10671	0.50618	72.3
2000	1300	100.001	282.139	-1.25616e+06	39.1827	151.147	2.525	55.5601	0.141799	17.5422	0.888373	0.00731437	4.90279	0.0727574	7.16909	9.88327	3.21943	0.10671	0.50618	72.3
2000	1299	100.001	282.043	-1.25631e+06	39.1799	151.147	2.53	55.5601	0.141799	17.5421	0.888593	0.00731437	4.90259	0.0727573	7.16909	9.88327	3.21943	0.10671	0.50618	72.3
2000	1298	100.001	281.947	-1.25646e+06	39.1772	151.147	2.534	55.5601	0.141799	17.5421	0.888814	0.00731437	4.90239	0.0727573	7.16909	9.88327	3.21942	0.10671	0.50618	72.3
2000	1297	100.001	281.851	-1.25661e+06	39.1744	151.147	2.538	55.5601	0.141799	17.5421	0.889037	0.00731436	4.90219	0.0727573	7.16909	9.88327	3.21942	0.10671	0.50618	72.3
2000	1296	100.001	281.754	-1.25676e+06	39.1716	151.147	2.543	55.5601	0.141799	17.5421	0.889261	0.00731436	4.90198	0.0727573	7.16909	9.88326	3.21942	0.10671	0.50618	72.3
2000	1295	100.001	281.658	-1.25692e+06	39.1689	151.146	2.547	55.5601	0.141799	17.5421	0.889486	0.00731436	4.90178	0.0727573	7.16908	9.88326	3.21942	0.10671	0.506179	72.3
2000	1294	100.001	281.562	-1.25707e+06	39.1661	151.146	2.552	55.5601	0.141799	17.5421	0.889713	0.00731436	4.90158	0.0727573	7.16908	9.88326	3.21942	0.10671	0.506179	72.3
2000	1293	100.001	281.465	-1.25722e+06	39.1633	151.146	2.556	55.56	0.141799	17.5421	0.889941	0.00731436	4.90137	0.0727572	7.16908	9.88326	3.21942	0.10671	0.506179	72.3
2000	1292	100.001	281.369	-1.25737e+06	39.1606	151.146	2.561	55.56	0.141799	17.5421	0.89017	0.00731436	4.90116	0.0727572	7.16908	9.88326	3.21942	0.10671	0.506179	72.3
2000	1291	100.001	281.272	-1.25752e+06	39.1578	151.146	2.565	55.56	0.141799	17.5421	0.890401	0.00731435	4.90095	0.0727572	7.16908	9.88325	3.21942	0.10671	0.506179	72.3
2000	1290	100.001	281.176	-1.25767e+06	39.1551	151.146	2.57	55.56	0.141799	17.5421	0.890633	0.00731435	4.90074	0.0727572	7.16908	9.88325	3.21942	0.10671	0.506179	72.3
2000	1289	100.001	281.079	-1.25782e+06	39.1523	151.146	2.574	55.56	0.141799	17.5421	0.890867	0.00731435	4.90053	0.0727572	7.16907	9.88325	3.21942	0.10671	0.506179	72.3
2000	1288	100.001	280.982	-1.25798e+06	39.1495	151.146	2.579	55.56	0.141799	17.5421	0.891102	0.00731435	4.90032	0.0727572	7.16907	9.88325	3.21942	0.10671	0.506179	72.3
2000	1287	100.001	280.885	-1.25813e+06	39.1468	151.146	2.583	55.56	0.141799	17.5421	0.891338	0.00731435	4.9001	0.0727571	7.16907	9.88324	3.21942	0.106709	0.506179	72.3
2000	1286	100.001	280.789	-1.25828e+06	39.144	151.145	2.588	55.56	0.141799	17.5421	0.891576	0.00731435	4.89989	0.0727571	7.16907	9.88324	3.21942	0.106709	0.506178	72.3
2000	1285	100.001	280.692	-1.25843e+06	39.1412	151.145	2.592	55.5599	0.141799	17.5421	0.891815	0.00731434	4.89967	0.0727571	7.16907	9.88324	3.21942	0.106709	0.506178	72.3
2000	1284	100.001	280.595	-1.25858e+06	39.1385	151.145	2.597	55.5599	0.141799	17.5421	0.892056	0.00731434	4.89945	0.0727571	7.16907	9.88324	3.21941	0.106709	0.506178	72.3
2000	1283	100.001	280.498	-1.25873e+06	39.1357	151.145	2.601	55.5599	0.141799	17.5421	0.892298	0.00731434	4.89923	0.0727571	7.16906	9.88323	3.21941	0.106709	0.506178	72.3
2000	1282	100.001	280.401	-1.25888e+06	39.133	151.145	2.606	55.5599	0.141799	17.5421	0.892541	0.00731434	4.89901	0.0727571	7.16906	9.88323	3.21941	0.106709	0.506178	72.3
2000	1281	100.001	280.303	-1.25904e+06	39.1302	151.145	2.61	55.5599	0.141798	17.5421	0.892786	0.00731434	4.89879	0.072757	7.16906	9.88323	3.21941	0.106709	0.506178	72.3
2000	1280	100.001	280.206	-1.25919e+06	39.1274	151.145	2.615	55.5599	0.141798	17.5421	0.893033	0.00731433	4.89857	0.072757	7.16906	9.88323	3.21941	0.106709	0.506178	72.3
2000	1279	100.002	280.109	-1.25934e+06	39.1247	151.145	2.619	55.5599	0.141798	17.5421	0.893281	0.00731433	4.89834	0.072757	7.16906	9.88322	3.21941	0.106709	0.506178	72.3
2000	1278	100.002	280.011	-1.25949e+06	39.1219	151.145	2.624	55.5598	0.141798	17.5421	0.89353	0.00731433	4.89812	0.072757	7.16905	9.88322	3.21941	0.106709	0.506177	72.3
2000	1277	100.002	279.914	-1.25964e+06	39.1192	151.144	2.628	55.5598	0.141798	17.5421	0.893781	0.00731433	4.89789	0.072757	7.16905	9.88322	3.21941	0.106709	0.506177	72.3
2000	1276	100.002	279.817	-1.25979e+06	39.1164	151.144	2.633	55.5598	0.141798	17.5421	0.894033	0.00731433	4.89766	0.0727569	7.16905	9.88322	3.21941	0.106709	0.506177	72.3
2000	1275	100.002	279.719	-1.25995e+06	39.1136	151.144	2.637	55.5598	0.141798	17.542	0.894287	0.00731433	4.89743	0.0727569	7.16905	9.88321	3.21941	0.106709	0.506177	72.3
2000	1274	100.002	279.621	-1.2601e+06	39.1109	151.144	2.642	55.5598	0.141798	17.542	0.894542	0.00731432	4.8972	0.0727569	7.16905	9.88321	3.21941	0.106709	0.506177	72.3
2000	1273	100.002	279.524	-1.26025e+06	39.1081	151.144	2.646	55.5598	0.141798	17.542	0.894798	0.00731432	4.89697	0.0727569	7.16905	9.88321	3.21941	0.106709	0.506177	72.3
2000	1272	100.002	279.426	-1.2604e+06	39.1054	151.144	2.651	55.5598	0.141798	17.542	0.895057	0.00731432	4.89674	0.0727569	7.16904	9.88321	3.2194	0.106709	0.506177	72.3
2000	1271	100.002	279.328	-1.26055e+06	39.1026	151.144	2.656	55.5597	0.141798	17.542	0.895316	0.00731432	4.8965	0.0727568	7.16904	9.8832	3.2194	0.106709	0.506177	72.3
2000	1270	100.002	279.23	-1.2607e+06	39.0999	151.144	2.66	55.5597	0.141798	17.542	0.895577	0.00731432	4.89627	0.0727568	7.16904	9.8832	3.2194	0.106709	0.506176	72.3
2000	1269	100.002	279.132	-1.26085e+06	39.0971	151.144	2.665	55.5597	0.141798	17.542	0.89584	0.00731431	4.89603	0.0727568	7.16904	9.8832	3.2194	0.106709	0.506176	72.3
2000	1268	100.002	279.034	-1.26101e+06	39.0943	151.144	2.669	55.5597	0.141798	17.542	0.896104	0.00731431	4.89579	0.0727568	7.16904	9.8832	3.2194	0.106709	0.506176	72.3
2000	1267	100.002	278.936	-1.26116e+06	39.0916	151.143	2.674	55.5597	0.141798	17.542	0.896369	0.00731431	4.89555	0.0727568	7.16903	9.88319	3.2194	0.106709	0.506176	72.3
2000	1266	100.002	278.838	-1.26131e+06	39.0888	151.143	2.679	55.5597	0.141798	17.542	0.896636	0.00731431	4.89531	0.0727568	7.16903	9.88319	3.2194	0.106709	0.506176	72.3
2000	1265	100.002	278.74	-1.26146e+06	39.0861	151.143	2.683	55.5597	0.141798	17.542	0.896905	0.00731431	4.89506	0.0727567	7.16903	9.88319	3.2194	0.106709	0.506176	72.3
2000	1264	100.002	278.642	-1.26161e+06	39.0833	151.143	2.688	55.5596	0.141798	17.542	0.897175	0.0073143	4.89482	0.0727567	7.16903	9.88319	3.2194	0.106709	0.506176	72.3
2000	1263	100.002	278.544	-1.26176e+06	39.0806	151.143	2.692	55.5596	0.141798	17.542	0.897446	0.0073143	4.89457	0.0727567	7.16903	9.88318	3.2194	0.106709	0.506175	72.3
2000	1262	100.002	278.445	-1.26191e+06	39.0778	151.143	2.697	55.5596	0.141798	17.542	0.89772	0.0073143	4.89433	0.0727567	7.16902	9.88318	3.2194	0.106709	0.506175	72.3
2000	1261	100.002	278.347	-1.26207e+06	39.075	151.143	2.702	55.5596	0.141798	17.542	0.897994	0.0073143	4.89408	0.0727567	7.16902	9.88318	3.2194	0.106709	0.506175	72.3
2000	1260	100.002	278.248	-1.26222e+06	39.0723	151.143	2.706	55.5596	0.141798	17.542	0.89827	0.0073143	4.89383	0.0727566	7.16902	9.88318	3.21939	0.106709	0.506175	72.3
2000	1259	100.002	278.15	-1.26237e+06	39.0695	151.143	2.711	55.5596	0.141798	17.542	0.898548	0.00731429	4.89358	0.0727566	7.16902	9.88317	3.21939	0.106709	0.506175	72.3
2000	1258	100.002	278.051	-1.26252e+06	39.0668	151.143	2.716	55.5596	0.141798	17.542	0.898827	0.00731429	4.89332	0.0727566	7.16902	9.88317	3.21939	0.106709	0.506175	72.3
2000	1257	100.002	277.952	-1.26267e+06	39.064	151.143	2.72	55.5595	0.141798	17.542	0.899108	0.00731429	4.89307	0.0727566	7.16901	9.88317	3.21939	0.106709	0.506175	72.3
2000	1256	100.002	277.854	-1.26282e+06	39.0613	151.142	2.725	55.5595	0.141798	17.542	0.89939	0.00731429	4.89281	0.0727566	7.16901	9.88316	3.21939	0.106709	0.506174	72.3
2000	1255	100.002	277.755	-1.26298e+06	39.0585	151.142	2.73	55.5595	0.141798	17.542	0.899674	0.00731429	4.89256	0.0727565	7.16901	9.88316	3.21939	0.106709	0.506174	72.3
2000	1254	100.002	277.656	-1.26313e+06	39.0558	151.142	2.734	55.5595	0.141797	17.5419	0.89996	0.00731428	4.8923	0.0727565	7.16901	9.88316	3.21939	0.106709	0.506174	72.3
2000	1253	100.002	277.557	-1.26328e+06	39.053	151.142	2.739	55.5595	0.141797	17.5419	0.900247	0.00731428	4.89204	0.0727565	7.16901	9.88316	3.21939	0.106709	0.506174	72.3
2000	1252	100.002	277.458	-1.26343e+06	39.0502	151.142	2.744	55.5595	0.141797	17.5419	0.900535	0.00731428	4.89178	0.0727565	7.169	9.88315	3.21939	0.106708	0.506174	72.3
2000	1251	100.002	277.359	-1.26358e+06	39.0475	151.142	2.748	55.5594	0.141797	17.5419	0.900825	0.00731428	4.89151	0.0727564	7.169	9.88315	3.21939	0.106708	0.506174	72.3
2000	1250	100.002	277.26	-1.26373e+06	39.0447	151.142	2.753	55.5594	0.141797	17.5419	0.901117	0.00731428	4.89125	0.0727564	7.169	9.88315	3.21939	0.106708	0.506174	72.3
2000	1249	100.002	277.161	-1.26389e+06	39.042	151.142	2.758	55.5594	0.141797	17.5419	0.90141	0.00731427	4.89098	0.0727564	7.169	9.88314	3.21938	0.106708	0.506173	72.3
2000	1248	100.002	277.061	-1.26404e+06	39.0392	151.142	2.763	55.5594	0.141797	17.5419	0.901705	0.00731427	4.89072	0.0727564	7.169	9.88314	3.21938	0.106708	0.506173	72.3
2000	1247	100.002	276.962	-1.26419e+06	39.0365	151.142	2.767	55.5594	0.141797	17.5419	0.902002	0.00731427	4.89045	0.0727564	7.16899	9.88314	3.21938	0.106708	0.506173	72.3
2000	1246	100.002	276.863	-1.26434e+06	39.0337	151.142	2.772	55.5594	0.141797	17.5419	0.9023	0.00731427	4.89018	0.0727563	7.16899	9.88314	3.21938	0.106708	0.506173	72.3
2000	1245	100.002	276.763	-1.26449e+06	39.031	151.142	2.777	55.5593	0.141797	17.5419	0.902599	0.00731426	4.88991	0.0727563	7.16899	9.88313	3.21938	0.106708	0.506173	72.3
2000	1244	100.002	276.664	-1.26464e+06	39.0282	151.142	2.781	55.5593	0.141797	17.5419	0.902901	0.00731426	4.88963	0.0727563	7.16899	9.88313	3.21938	0.106708	0.506173	72.3
2000	1243	100.003	276.564	-1.26479e+06	39.0255	151.141	2.786	55.5593	0.141797	17.5419	0.903203	0.00731426	4.88936	0.0727563	7.16899	9.88313	3.21938	0.106708	0.506173	72.3
2000	1242	100.003	276.464	-1.26495e+06	39.0227	151.141	2.791	55.5593	0.141797	17.5419	0.903508	0.00731426	4.88908	0.0727563	7.16898	9.88312	3.21938	0.106708	0.506172	72.3
2000	1241	100.003	276.365	-1.2651e+06	39.02	151.141	2.796	55.5593	0.141797	17.5419	0.903814	0.00731426	4.88881	0.0727562	7.16898	9.88312	3.21938	0.106708	0.506172	72.3
2000	1240	100.003	276.265	-1.26525e+06	39.0172	151.141	2.801	55.5593	0.141797	17.5419	0.904122	0.00731425	4.88853	0.0727562	7.16898	9.88312	3.21938	0.106708	0.506172	72.3
2000	1239	100.003	276.165	-1.2654e+06	39.0145	151.141	2.805	55.5592	0.141797	17.5419	0.904431	0.00731425	4.88825	0.0727562	7.16898	9.88311	3.21937	0.106708	0.506172	72.3
2000	1238	100.003	276.065	-1.26555e+06	39.0117	151.141	2.81	55.5592	0.141797	17.5419	0.904742	0.00731425	4.88797	0.0727562	7.16897	9.88311	3.21937	0.106708	0.506172	72.3
2000	1237	100.003	275.965	-1.2657e+06	39.009	151.141	2.815	55.5592	0.141797	17.5419	0.905055	0.00731425	4.88768	0.0727561	7.16897	9.88311	3.21937	0.106708	0.506172	72.3
2000	1236	100.003	275.865	-1.26586e+06	39.0062	151.141	2.82	55.5592	0.141797	17.5419	0.905369	0.00731424	4.8874	0.0727561	7.16897	9.8831	3.21937	0.106708	0.506171	72.3
2000	1235	100.003	275.765	-1.26601e+06	39.0035	151.141	2.824	55.5592	0.141797	17.5418	0.905685	0.00731424	4.88711	0.0727561	7.16897	9.8831	3.21937	0.106708	0.506171	72.3
2000	1234	100.003	275.665	-1.26616e+06	39.0007	151.141	2.829	55.5592	0.141797	17.5418	0.906003	0.00731424	4.88682	0.0727561	7.16897	9.8831	3.21937	0.106708	0.506171	72.3
2000	1233	100.003	275.564	-1.26631e+06	38.998	151.141	2.834	55.5591	0.141797	17.5418	0.906322	0.00731424	4.88654	0.072756	7.16896	9.8831	3.21937	0.106708	0.506171	72.3
2000	1232	100.003	275.464	-1.26646e+06	38.9952	151.141	2.839	55.5591	0.141797	17.5418	0.906643	0.00731424	4.88624	0.072756	7.16896	9.88309	3.21937	0.106708	0.506171	72.3
2000	1231	100.003	275.364	-1.26661e+06	38.9925	151.141	2.844	55.5591	0.141796	17.5418	0.906966	0.00731423	4.88595	0.072756	7.16896	9.88309	3.21937	0.106708	0.506171	72.3
2000	1230	100.003	275.263	-1.26677e+06	38.9897	151.141	2.849	55.5591	0.141796	17.5418	0.90729	0.00731423	4.88566	0.072756	7.16896	9.88309	3.21937	0.106708	0.50617	72.3
2000	1229	100.003	275.163	-1.26692e+06	38.987	151.141	2.853	55.5591	0.141796	17.5418	0.907616	0.00731423	4.88536	0.072756	7.16895	9.88308	3.21936	0.106708	0.50617	72.3
2000	1228	100.003	275.062	-1.26707e+06	38.9842	151.14	2.858	55.559	0.141796	17.5418	0.907944	0.00731423	4.88507	0.0727559	7.16895	9.88308	3.21936	0.106708	0.50617	72.3
2000	1227	100.003	274.961	-1.26722e+06	38.9815	151.14	2.863	55.559	0.141796	17.5418	0.908273	0.00731422	4.88477	0.0727559	7.16895	9.88308	3.21936	0.106708	0.50617	72.3
2000	1226	100.003	274.861	-1.26737e+06	38.9787	151.14	2.868	55.559	0.141796	17.5418	0.908604	0.00731422	4.88447	0.0727559	7.16895	9.88307	3.21936	0.106708	0.50617	72.3
2000	1225	100.003	274.76	-1.26752e+06	38.976	151.14	2.873	55.559	0.141796	17.5418	0.908937	0.00731422	4.88417	0.0727559	7.16894	9.88307	3.21936	0.106708	0.50617	72.3
2000	1224	100.003	274.659	-1.26768e+06	38.9732	151.14	2.878	55.559	0.141796	17.5418	0.909272	0.00731422	4.88386	0.0727558	7.16894	9.88307	3.21936	0.106708	0.506169	72.3
2000	1223	100.003	274.558	-1.26783e+06	38.9705	151.14	2.883	55.559	0.141796	17.5418	0.909608	0.00731421	4.88356	0.0727558	7.16894	9.88306	3.21936	0.106708	0.506169	72.3
2000	1222	100.003	274.457	-1.26798e+06	38.9678	151.14	2.887	55.5589	0.141796	17.5418	0.909946	0.00731421	4.88325	0.0727558	7.16894	9.88306	3.21936	0.106707	0.506169	72.3
2000	1221	100.003	274.356	-1.26813e+06	38.965	151.14	2.892	55.5589	0.141796	17.5418	0.910286	0.00731421	4.88295	0.0727558	7.16893	9.88306	3.21936	0.106707	0.506169	72.3
2000	1220	100.003	274.255	-1.26828e+06	38.9623	151.14	2.897	55.5589	0.141796	17.5418	0.910627	0.00731421	4.88264	0.0727557	7.16893	9.88305	3.21935	0.106707	0.506169	72.3
2000	1219	100.003	274.154	-1.26843e+06	38.9595	151.14	2.902	55.5589	0.141796	17.5418	0.91097	0.0073142	4.88233	0.0727557	7.16893	9.88305	3.21935	0.106707	0.506169	72.4
2000	1218	100.003	274.053	-1.26858e+06	38.9568	151.14	2.907	55.5589	0.141796	17.5417	0.911315	0.0073142	4.88201	0.0727557	7.16893	9.88305	3.21935	0.106707	0.506168	72.4
2000	1217	100.003	273.951	-1.26874e+06	38.954	151.14	2.912	55.5588	0.141796	17.5417	0.911662	0.0073142	4.8817	0.0727557	7.16892	9.88304	3.21935	0.106707	0.506168	72.4
2000	1216	100.003	273.85	-1.26889e+06	38.9513	151.14	2.917	55.5588	0.141796	17.5417	0.91201	0.0073142	4.88138	0.0727556	7.16892	9.88304	3.21935	0.106707	0.506168	72.4
2000	1215	100.003	273.748	-1.26904e+06	38.9485	151.14	2.922	55.5588	0.141796	17.5417	0.91236	0.00731419	4.88107	0.0727556	7.16892	9.88304	3.21935	0.106707	0.506168	72.4
2000	1214	100.003	273.647	-1.26919e+06	38.9458	151.14	2.927	55.5588	0.141796	17.5417	0.912712	0.00731419	4.88075	0.0727556	7.16892	9.88303	3.21935	0.106707	0.506168	72.4
2000	1213	100.003	273.545	-1.26934e+06	38.943	151.14	2.932	55.5588	0.141796	17.5417	0.913066	0.00731419	4.88043	0.0727556	7.16891	9.88303	3.21935	0.106707	0.506168	72.4
2000	1212	100.004	273.444	-1.26949e+06	38.9403	151.14	2.937	55.5587	0.141796	17.5417	0.913422	0.00731419	4.88011	0.0727555	7.16891	9.88303	3.21935	0.106707	0.506167	72.4
2000	1211	100.004	273.342	-1.26965e+06	38.9376	151.14	2.942	55.5587	0.141795	17.5417	0.913779	0.00731418	4.87978	0.0727555	7.16891	9.88302	3.21934	0.106707	0.506167	72.4
2000	1210	100.004	273.24	-1.2698e+06	38.9348	151.14	2.947	55.5587	0.141795	17.5417	0.914138	0.00731418	4.87946	0.0727555	7.16891	9.88302	3.21934	0.106707	0.506167	72.4
2000	1209	100.004	273.138	-1.26995e+06	38.9321	151.14	2.951	55.5587	0.141795	17.5417	0.914499	0.00731418	4.87913	0.0727554	7.1689	9.88301	3.21934	0.106707	0.506167	72.4
2000	1208	99.7839	272.444	-1.26735e+06	38.85	150.775	2.961	55.5589	0.142079	17.5749	0.9143	0.00733028	4.872	0.0729157	7.11646	9.90054	3.22638	0.106942	0.507281	72.2
2000	1207	99.6452	271.968	-1.26576e+06	38.7971	150.545	2.969	55.559	0.142258	17.596	0.914302	0.00734049	4.86734	0.0730171	7.08329	9.91161	3.23084	0.107091	0.507987	72.2
2000	1206	99.5071	271.497	-1.26418e+06	38.7445	145.78	2.977	55.5591	0.142438	17.617	0.914298	0.00735067	4.86264	0.0731185	7.0502	9.92265	3.2353	0.107239	0.508692	72.1
2000	1205	99.3696	271.028	-1.2626e+06	38.6921	145.555	2.985	55.5593	0.142617	17.6379	0.914291	0.00736085	4.85792	0.0732197	7.01721	9.93366	3.23975	0.107388	0.509397	72
2000	1204	98.604	268.877	-1.25276e+06	38.4002	144.384	2.993	55.5882	0.143683	17.6168	0.917768	0.007418	4.87023	0.0737882	6.97511	9.9339	3.25156	0.108166	0.513352	71.8
2000	1203	97.1803	264.963	-1.23426e+06	37.8572	142.222	3.001	55.6484	0.145722	17.5499	0.925036	0.00752668	4.90101	0.0748692	6.9233	9.9225	3.27128	0.109631	0.520872	71.6
2000	1202	95.7985	261.165	-1.21631e+06	37.3302	140.125	3.01	55.7082	0.147759	17.4833	0.932261	0.00763524	4.93146	0.0759491	6.8719	9.91125	3.29083	0.111093	0.528385	71.3
2000	1201	94.457	257.476	-1.19888e+06	36.8185	138.088	3.018	55.7677	0.149794	17.417	0.939444	0.00774368	4.9616	0.0770278	6.82092	9.90013	3.3102	0.112552	0.53589	71
2000	1200	93.1538	253.893	-1.18195e+06	36.3213	136.111	3.026	55.8269	0.151826	17.3511	0.946585	0.00785201	4.99142	0.0781053	6.77033	9.88915	3.32939	0.114007	0.543386	70.7
2000	1199	91.8875	250.411	-1.16551e+06	35.8382	134.19	3.035	55.8857	0.153856	17.2854	0.953686	0.00796022	5.02094	0.0791818	6.72015	9.8783	3.34841	0.115458	0.550875	70.5
2000	1198	90.6564	247.026	-1.14953e+06	35.3686	132.322	3.043	55.9443	0.155884	17.2201	0.960746	0.00806832	5.05016	0.080257	6.67035	9.86758	3.36727	0.116906	0.558356	70.2
2000	1197	89.4591	243.733	-1.13399e+06	34.9117	130.507	3.051	56.0025	0.15791	17.1552	0.967767	0.0081763	5.07907	0.0813312	6.62093	9.85698	3.38596	0.11835	0.565829	69.9
2000	1196	88.2942	240.529	-1.11887e+06	34.4672	128.741	3.059	56.0604	0.159934	17.0905	0.974749	0.00828417	5.10769	0.0824042	6.57189	9.84651	3.4045	0.119791	0.573294	69.6
2000	1195	87.1604	237.411	-1.10417e+06	34.0346	127.023	3.067	56.1181	0.161955	17.0262	0.981692	0.00839193	5.13602	0.0834761	6.52321	9.83614	3.42288	0.121229	0.580751	69.4
2000	1194	86.0566	234.374	-1.08985e+06	33.6134	125.35	3.075	56.1754	0.163975	16.9621	0.988597	0.00849958	5.16407	0.0845468	6.4749	9.8259	3.4411	0.122663	0.5882	69.1
2000	1193	84.9814	231.416	-1.07591e+06	33.203	123.721	3.083	56.2325	0.165992	16.8984	0.995465	0.00860711	5.19183	0.0856165	6.42694	9.81576	3.45918	0.124093	0.595642	68.8
2000	1192	83.9339	228.534	-1.06233e+06	32.8032	122.135	3.091	56.2893	0.168007	16.835	1.0023	0.00871453	5.21931	0.086685	6.37934	9.80573	3.47711	0.125521	0.603076	68.5
2000	1191	82.913	225.725	-1.04909e+06	32.4135	120.589	3.099	56.3458	0.17002	16.7718	1.00909	0.00882183	5.24652	0.0877524	6.33207	9.7958	3.49489	0.126945	0.610502	68.3
2000	1190	81.9175	222.986	-1.03619e+06	32.0335	119.082	3.107	56.402	0.172031	16.709	1.01585	0.00892903	5.27345	0.0888187	6.28515	9.78598	3.51253	0.128366	0.61792	68
2000	1189	80.9467	220.315	-1.02362e+06	31.6629	117.613	3.115	56.458	0.17404	16.6464	1.02257	0.00903612	5.30012	0.0898839	6.23856	9.77625	3.53004	0.129783	0.625331	67.7
2000	1188	79.7882	217.155	-1.00878e+06	31.226	115.851	3.128	56.5285	0.176295	16.6331	1.02761	0.00916733	5.3288	0.0911891	6.17285	9.70865	3.55786	0.131555	0.634411	67.4
2000	1187	78.721	214.237	-995073	30.8223	114.231	3.139	56.5947	0.178474	16.6061	1.03306	0.0092916	5.35656	0.0924253	6.11321	9.65749	3.58253	0.133223	0.643012	67
2000	1186	77.684	211.402	-981760	30.4299	112.658	3.15	56.6604	0.180646	16.579	1.03846	0.00941563	5.38403	0.093659	6.05422	9.60675	3.60695	0.134885	0.651595	66.7
2000	1185	76.676	208.646	-968820	30.0485	111.129	3.161	56.7259	0.182811	16.5517	1.04381	0.00953941	5.4112	0.0948903	5.99586	9.55643	3.63112	0.136543	0.660161	66.4
2000	1184	75.6958	205.965	-956239	29.6775	109.642	3.172	56.791	0.184969	16.5244	1.04912	0.00966295	5.4381	0.0961191	5.93814	9.50653	3.65505	0.138195	0.66871	66.1
2000	1183	74.7421	203.356	-944002	29.3165	108.196	3.183	56.8558	0.18712	16.497	1.05438	0.00978624	5.46472	0.0973455	5.88103	9.45702	3.67874	0.139841	0.677242	65.7
2000	1182	73.814	200.817	-932094	28.9651	106.79	3.194	56.9203	0.189264	16.4694	1.0596	0.00990929	5.49107	0.0985695	5.82454	9.40793	3.70219	0.141483	0.685758	65.4
2000	1181	72.9104	198.345	-920503	28.6229	105.42	3.205	56.9844	0.191402	16.4418	1.06478	0.0100321	5.51715	0.0997911	5.76864	9.35922	3.72541	0.14312	0.694256	65.1
2000	1180	72.0304	195.936	-909217	28.2897	104.087	3.216	57.0482	0.193533	16.414	1.06992	0.0101547	5.54296	0.10101	5.71334	9.31091	3.7484	0.144751	0.702739	64.7
2000	1179	71.1729	193.59	-898222	27.9649	102.789	3.226	57.1117	0.195657	16.3862	1.07502	0.010277	5.56852	0.102227	5.65862	9.26299	3.77117	0.146377	0.711205	64.4
2000	1178	70.3373	191.302	-887508	27.6483	101.524	3.237	57.175	0.197775	16.3582	1.08007	0.0103991	5.59383	0.103442	5.60447	9.21545	3.79371	0.147999	0.719654	64.1
2000	1177	69.5226	189.072	-877065	27.3396	100.291	3.248	57.2379	0.199887	16.3302	1.08509	0.010521	5.61889	0.104654	5.55089	9.16828	3.81602	0.149615	0.728088	63.8
2000	1176	68.728	186.896	-866882	27.0385	99.0892	3.258	57.3004	0.201992	16.3021	1.09008	0.0106426	5.64371	0.105864	5.49787	9.12149	3.83812	0.151227	0.736505	63.4
2000	1175	67.9346	184.726	-856753	26.7385	97.8913	3.269	57.3658	0.204141	16.2746	1.09431	0.0107669	5.66391	0.1071	5.44545	9.07519	3.86078	0.152873	0.745107	63.1
2000	1174	67.1518	182.586	-846762	26.4424	96.7101	3.28	57.4314	0.206316	16.2458	1.09855	0.0108924	5.68367	0.108349	5.39253	9.03078	3.88338	0.154533	0.753792	62.8
2000	1173	66.3883	180.497	-837018	26.1536	95.5582	3.291	57.4967	0.208485	16.2169	1.10276	0.0110177	5.7032	0.109595	5.34017	8.98672	3.90575	0.156188	0.762461	62.5
2000	1172	65.6433	178.46	-827512	25.8717	94.4347	3.301	57.5618	0.210647	16.1879	1.10694	0.0111427	5.72252	0.110839	5.28836	8.94298	3.92792	0.157838	0.771114	62.2
2000	1171	64.9162	176.47	-818235	25.5965	93.3384	3.312	57.6265	0.212802	16.1589	1.11109	0.0112675	5.74163	0.11208	5.23709	8.89958	3.94987	0.159483	0.779752	61.9
2000	1170	64.2063	174.528	-809179	25.3278	92.2683	3.323	57.6909	0.214952	16.1297	1.11521	0.0113921	5.76054	0.113319	5.18636	8.85651	3.97161	0.161123	0.788373	61.6
2000	1169	63.513	172.631	-800337	25.0654	91.2236	3.333	57.7551	0.217096	16.1004	1.11929	0.0115165	5.77925	0.114556	5.13616	8.81376	3.99315	0.162758	0.796979	61.3
2000	1168	62.8357	170.777	-791700	24.8089	90.2034	3.344	57.8189	0.219233	16.0711	1.12335	0.0116406	5.79775	0.115791	5.08648	8.77132	4.01448	0.164389	0.80557	61
2000	1167	62.1738	168.965	-783261	24.5583	89.2067	3.354	57.8825	0.221365	16.0416	1.12738	0.0117645	5.81606	0.117024	5.03731	8.7292	4.03561	0.166015	0.814145	60.7
2000	1166	61.5269	167.194	-775015	24.3133	88.2329	3.364	57.9458	0.22349	16.0121	1.13139	0.0118882	5.83418	0.118254	4.98865	8.6874	4.05655	0.167636	0.822705	60.4
2000	1165	60.8945	165.462	-766953	24.0737	87.281	3.375	58.0088	0.22561	15.9825	1.13536	0.0120117	5.85212	0.119482	4.94049	8.6459	4.07728	0.169252	0.83125	60.1
2000	1164	60.2759	163.768	-759071	23.8394	86.3504	3.385	58.0715	0.227724	15.9528	1.13931	0.0121349	5.86986	0.120708	4.89282	8.6047	4.09782	0.170864	0.83978	59.8
2000	1163	59.6709	162.111	-751361	23.6101	85.4404	3.395	58.1339	0.229833	15.923	1.14324	0.012258	5.88743	0.121932	4.84564	8.56381	4.11816	0.172471	0.848295	59.5
2000	1162	59.0789	160.489	-743819	23.3857	84.5502	3.405	58.1961	0.231936	15.8931	1.14713	0.0123808	5.90482	0.123154	4.79894	8.52321	4.13832	0.174074	0.856795	59.1
2000	1161	58.4995	158.901	-736439	23.166	83.6793	3.415	58.258	0.234033	15.8632	1.15101	0.0125034	5.92203	0.124374	4.75271	8.48291	4.15829	0.175672	0.865281	58.8
2000	1160	57.9323	157.347	-729215	22.951	82.827	3.425	58.3196	0.236125	15.8332	1.15486	0.0126258	5.93907	0.125592	4.70695	8.4429	4.17807	0.177266	0.873753	58.5
2000	1159	57.377	155.825	-722143	22.7404	81.9927	3.435	58.381	0.238211	15.8031	1.15868	0.0127481	5.95594	0.126807	4.66165	8.40317	4.19766	0.178855	0.88221	58.2
2000	1158	56.833	154.334	-715218	22.5341	81.1758	3.445	58.4421	0.240292	15.7729	1.16248	0.0128701	5.97264	0.128021	4.6168	8.36373	4.21708	0.18044	0.890653	57.9
2000	1157	56.3002	152.873	-708435	22.332	80.3758	3.455	58.503	0.242367	15.7426	1.16626	0.0129919	5.98917	0.129232	4.57241	8.32457	4.23631	0.18202	0.899082	57.6
2000	1156	55.7781	151.442	-701790	22.1339	79.5922	3.464	58.5635	0.244438	15.7123	1.17002	0.0131135	6.00555	0.130442	4.52845	8.28569	4.25537	0.183597	0.907497	57.3
2000	1155	55.2665	150.039	-695278	21.9397	78.8245	3.474	58.6239	0.246503	15.6819	1.17375	0.0132349	6.02177	0.13165	4.48493	8.24709	4.27424	0.185168	0.915899	57
2000	1154	54.7649	148.663	-688896	21.7493	78.0721	3.484	58.6839	0.248563	15.6514	1.17746	0.0133561	6.03782	0.132855	4.44185	8.20876	4.29295	0.186736	0.924287	56.7
2000	1153	54.2732	147.314	-682640	21.5626	77.3347	3.493	58.7437	0.250618	15.6209	1.18116	0.0134771	6.05373	0.134059	4.39919	8.17069	4.31148	0.188299	0.932661	56.4
2000	1152	53.791	145.991	-676506	21.3795	76.6118	3.503	58.8033	0.252668	15.5903	1.18483	0.0135979	6.06948	0.135261	4.35694	8.1329	4.32984	0.189858	0.941023	56.1
2000	1151	53.318	144.693	-670490	21.1999	75.9029	3.513	58.8626	0.254713	15.5596	1.18848	0.0137185	6.08508	0.136461	4.31512	8.09536	4.34803	0.191413	0.949371	55.8
2000	1150	52.8539	143.42	-664588	21.0236	75.2076	3.522	58.9217	0.256754	15.5289	1.19211	0.013839	6.10054	0.137659	4.2737	8.05809	4.36605	0.192964	0.957706	55.5
2000	1149	52.3986	142.17	-658799	20.8506	74.5256	3.531	58.9805	0.258789	15.4981	1.19572	0.0139592	6.11584	0.138855	4.23269	8.02108	4.38391	0.194511	0.966028	55.2
2000	1148	51.9518	140.943	-653118	20.6808	73.8565	3.541	59.0391	0.26082	15.4672	1.19931	0.0140793	6.13101	0.140049	4.19207	7.98432	4.40161	0.196054	0.974337	54.9
2000	1147	51.5131	139.738	-647542	20.5141	73.1999	3.55	59.0975	0.262846	15.4363	1.20288	0.0141992	6.14603	0.141242	4.15185	7.94781	4.41914	0.197592	0.982634	54.6
2000	1146	51.0825	138.556	-642068	20.3504	72.5554	3.559	59.1556	0.264867	15.4053	1.20644	0.0143189	6.16092	0.142433	4.11202	7.91156	4.43651	0.199127	0.990918	54.3
2000	1145	50.6596	137.394	-636694	20.1896	71.9227	3.569	59.2135	0.266884	15.3743	1.20997	0.0144384	6.17566	0.143622	4.07257	7.87555	4.45372	0.200658	0.99919	54
2000	1144	50.2442	136.253	-631417	20.0316	71.3015	3.578	59.2711	0.268896	15.3432	1.21349	0.0145578	6.19027	0.144809	4.0335	7.83978	4.47078	0.202184	1.00745	53.7
2000	1143	49.8362	135.132	-626234	19.8764	70.6915	3.587	59.3285	0.270904	15.312	1.21699	0.014677	6.20475	0.145994	3.99481	7.80426	4.48768	0.203707	1.0157	53.4
2000	1142	49.4354	134.031	-621142	19.7239	70.0923	3.596	59.3857	0.272908	15.2808	1.22048	0.014796	6.21909	0.147178	3.95648	7.76898	4.50442	0.205226	1.02393	53.1
2000	1141	49.0415	132.948	-616140	19.574	69.5037	3.605	59.4427	0.274907	15.2495	1.22395	0.0149148	6.23331	0.14836	3.91852	7.73394	4.52102	0.206741	1.03216	52.8
2000	1140	48.6544	131.884	-611224	19.4267	68.9254	3.614	59.4994	0.276901	15.2182	1.2274	0.0150335	6.24739	0.149541	3.88092	7.69913	4.53746	0.208253	1.04037	52.5
2000	1139	48.2738	130.838	-606392	19.2819	68.3571	3.623	59.5559	0.278892	15.1868	1.23083	0.015152	6.26135	0.15072	3.84368	7.66456	4.55375	0.20976	1.04857	52.2
2000	1138	47.8997	129.809	-601643	19.1394	67.7985	3.632	59.6122	0.280878	15.1554	1.23425	0.0152703	6.27518	0.151897	3.80679	7.63022	4.5699	0.211264	1.05676	51.9
2000	1137	47.5319	128.798	-596974	18.9993	67.2495	3.641	59.6683	0.28286	15.1239	1.23766	0.0153885	6.28889	0.153072	3.77024	7.5961	4.58589	0.212765	1.06494	51.6
2000	1136	47.1701	127.803	-592382	18.8615	66.7097	3.649	59.7241	0.284838	15.0924	1.24105	0.0155065	6.30248	0.154246	3.73404	7.56221	4.60175	0.214261	1.07311	51.3
2000	1135	46.8143	126.824	-587867	18.726	66.1789	3.658	59.7798	0.286812	15.0608	1.24442	0.0156244	6.31594	0.155418	3.69818	7.52855	4.61746	0.215754	1.08126	51
2000	1134	46.4643	125.861	-583426	18.5926	65.6569	3.667	59.8352	0.288782	15.0292	1.24778	0.0157421	6.32929	0.156589	3.66265	7.4951	4.63302	0.217243	1.08941	50.7
2000	1133	46.1199	124.913	-579057	18.4613	65.1435	3.675	59.8904	0.290748	14.9976	1.25112	0.0158596	6.34251	0.157759	3.62746	7.46188	4.64845	0.218729	1.09754	50.5
2000	1132	45.781	123.981	-574759	18.3322	64.6384	3.684	59.9454	0.29271	14.9658	1.25445	0.015977	6.35563	0.158926	3.59259	7.42887	4.66374	0.220211	1.10567	50.2
2000	1131	45.4475	123.063	-570529	18.205	64.1415	3.693	60.0002	0.294668	14.9341	1.25777	0.0160943	6.36862	0.160093	3.55804	7.39608	4.67889	0.22169	1.11378	49.9
2000	1130	45.1193	122.159	-566366	18.0798	63.6525	3.701	60.0548	0.296623	14.9023	1.26107	0.0162114	6.3815	0.161257	3.52381	7.3635	4.6939	0.223165	1.12188	49.6
2000	1129	44.7961	121.269	-562269	17.9565	63.1712	3.71	60.1092	0.298573	14.8705	1.26436	0.0163283	6.39427	0.162421	3.4899	7.33114	4.70877	0.224636	1.12998	49.3
2000	1128	44.4779	120.393	-558235	17.8352	62.6976	3.718	60.1633	0.30052	14.8386	1.26763	0.0164451	6.40693	0.163582	3.4563	7.29898	4.72351	0.226105	1.13806	49
2000	1127	44.1646	119.53	-554264	17.7156	62.2313	3.726	60.2173	0.302464	14.8067	1.2709	0.0165618	6.41947	0.164743	3.42301	7.26703	4.73812	0.227569	1.14613	48.7
2000	1126	43.8561	118.68	-550354	17.5978	61.7722	3.735	60.2711	0.304403	14.7747	1.27414	0.0166783	6.43191	0.165902	3.39002	7.23528	4.7526	0.229031	1.1542	48.4
2000	1125	43.5522	117.843	-546503	17.4818	61.3202	3.743	60.3247	0.306339	14.7427	1.27738	0.0167947	6.44424	0.16706	3.35733	7.20374	4.76695	0.230489	1.16225	48.1
2000	1124	43.2528	117.018	-542709	17.3675	60.875	3.751	60.3781	0.308272	14.7107	1.2806	0.0169109	6.45646	0.168216	3.32494	7.1724	4.78116	0.231944	1.17029	47.8
2000	1123	42.9579	116.205	-538973	17.2549	60.4365	3.759	60.4313	0.310201	14.6786	1.28382	0.017027	6.46857	0.169371	3.29284	7.14126	4.79525	0.233395	1.17833	47.5
2000	1122	42.6673	115.404	-535292	17.1439	60.0046	3.768	60.4843	0.312127	14.6465	1.28702	0.017143	6.48058	0.170524	3.26104	7.11032	4.80922	0.234843	1.18636	47.3
2000	1121	42.3809	114.614	-531665	17.0345	59.5791	3.776	60.5371	0.314049	14.6144	1.2902	0.0172588	6.49249	0.171677	3.22952	7.07957	4.82305	0.236288	1.19437	47
2000	1120	42.0986	113.836	-528091	16.9266	59.1599	3.784	60.5897	0.315968	14.5822	1.29338	0.0173745	6.50429	0.172828	3.19828	7.04902	4.83677	0.23773	1.20238	46.7
2000	1119	41.8204	113.069	-524568	16.8203	58.7468	3.792	60.6422	0.317883	14.55	1.29654	0.0174901	6.516	0.173977	3.16733	7.01866	4.85036	0.239169	1.21038	46.4
2000	1118	41.5462	112.313	-521096	16.7154	58.3397	3.8	60.6944	0.319795	14.5178	1.2997	0.0176056	6.52759	0.175126	3.13665	6.98849	4.86382	0.240604	1.21837	46.1
2000	1117	41.2758	111.567	-517674	16.612	57.9384	3.808	60.7465	0.321704	14.4856	1.30284	0.0177209	6.53909	0.176273	3.10625	6.95851	4.87717	0.242036	1.22635	45.8
2000	1116	41.0092	110.831	-514299	16.51	57.5428	3.816	60.7984	0.32361	14.4533	1.30597	0.0178361	6.55049	0.177419	3.07611	6.92872	4.89039	0.243466	1.23432	45.5
2000	1115	40.7463	110.106	-510972	16.4095	57.1529	3.824	60.8501	0.325513	14.421	1.30909	0.0179512	6.5618	0.178564	3.04625	6.89911	4.9035	0.244892	1.24229	45.2
2000	1114	40.487	109.39	-507692	16.3103	56.7684	3.831	60.9016	0.327412	14.3886	1.31219	0.0180662	6.573	0.179707	3.01665	6.86969	4.91649	0.246315	1.25024	45
2000	1113	40.2312	108.684	-504456	16.2124	56.3893	3.839	60.953	0.329309	14.3562	1.31529	0.018181	6.58411	0.18085	2.98731	6.84045	4.92936	0.247735	1.25819	44.7
2000	1112	39.979	107.988	-501265	16.1158	56.0154	3.847	61.0042	0.331202	14.3238	1.31838	0.0182957	6.59512	0.181991	2.95823	6.81139	4.94212	0.249152	1.26613	44.4
2000	1111	39.7301	107.301	-498117	16.0205	55.6466	3.855	61.0552	0.333092	14.2914	1.32146	0.0184103	6.60603	0.183131	2.92941	6.78251	4.95476	0.250566	1.27406	44.1
2000	1110	39.4845	106.622	-495011	15.9265	55.2829	3.862	61.106	0.33498	14.259	1.32452	0.0185248	6.61685	0.18427	2.90084	6.7538	4.96729	0.251977	1.28198	43.8
2000	1109	39.2422	105.953	-491947	15.8337	54.9241	3.87	61.1567	0.336864	14.2265	1.32758	0.0186392	6.62758	0.185408	2.87252	6.72527	4.97971	0.253385	1.2899	43.5
2000	1108	39.003	105.293	-488924	15.7421	54.5701	3.878	61.2071	0.338746	14.194	1.33063	0.0187535	6.63821	0.186545	2.84444	6.69692	4.99201	0.25479	1.29781	43.3
2000	1107	38.767	104.641	-485941	15.6516	54.2208	3.885	61.2575	0.340624	14.1615	1.33366	0.0188677	6.64875	0.18768	2.81662	6.66874	5.00421	0.256192	1.30571	43
2000	1106	38.5341	103.997	-482996	15.5623	53.8761	3.893	61.3076	0.3425	14.1289	1.33669	0.0189818	6.65919	0.188815	2.78903	6.64073	5.01629	0.257592	1.3136	42.7
2000	1105	38.3041	103.361	-480090	15.4742	53.5359	3.9	61.3576	0.344373	14.0964	1.33971	0.0190957	6.66955	0.189949	2.76169	6.61289	5.02827	0.258988	1.32149	42.4
2000	1104	38.0771	102.734	-477222	15.3871	53.2002	3.908	61.4074	0.346244	14.0638	1.34272	0.0192096	6.67981	0.191081	2.73458	6.58522	5.04014	0.260382	1.32937	42.1
2000	1103	37.8529	102.114	-474390	15.3012	52.8688	3.915	61.4571	0.348111	14.0312	1.34571	0.0193233	6.68999	0.192213	2.7077	6.55772	5.0519	0.261773	1.33724	41.9
2000	1102	37.6316	101.502	-471594	15.2163	52.5417	3.922	61.5066	0.349976	13.9986	1.3487	0.019437	6.70007	0.193343	2.68106	6.53038	5.06356	0.263162	1.34511	41.6
2000	1101	37.413	100.898	-468833	15.1324	52.2188	3.93	61.556	0.351838	13.966	1.35168	0.0195505	6.71007	0.194473	2.65465	6.5032	5.07511	0.264547	1.35297	41.3
2000	1100	37.1971	100.301	-466107	15.0496	51.8999	3.937	61.6051	0.353698	13.9333	1.35465	0.019664	6.71997	0.195601	2.62847	6.47619	5.08656	0.26593	1.36082	41
2000	1099	36.9839	99.711	-463415	14.9677	51.585	3.944	61.6542	0.355555	13.9006	1.35762	0.0197774	6.72979	0.196729	2.6025	6.44934	5.09791	0.26731	1.36866	40.8
2000	1098	36.7733	99.1283	-460756	14.8869	51.2741	3.951	61.7031	0.357409	13.8679	1.36057	0.0198906	6.73952	0.197856	2.57677	6.42265	5.10915	0.268687	1.3765	40.5
2000	1097	36.5652	98.5526	-458129	14.807	50.967	3.959	61.7518	0.359261	13.8352	1.36351	0.0200038	6.74916	0.198982	2.55125	6.39612	5.12029	0.270062	1.38434	40.2
2000	1096	36.3597	97.9838	-455535	14.728	50.6637	3.966	61.8004	0.361111	13.8025	1.36645	0.0201169	6.75871	0.200107	2.52594	6.36975	5.13133	0.271434	1.39216	39.9
2000	1095	36.1566	97.4217	-452972	14.65	50.3641	3.973	61.8488	0.362957	13.7698	1.36938	0.0202299	6.76818	0.201231	2.50086	6.34353	5.14228	0.272804	1.39998	39.7
2000	1094	35.9559	96.8662	-450440	14.5729	50.0682	3.98	61.897	0.364802	13.7371	1.37229	0.0203428	6.77756	0.202354	2.47598	6.31747	5.15312	0.27417	1.4078	39.4
2000	1093	35.7576	96.3172	-447938	14.4967	49.7758	3.987	61.9452	0.366644	13.7043	1.3752	0.0204557	6.78686	0.203476	2.45132	6.29156	5.16387	0.275535	1.4156	39.1
2000	1092	35.5616	95.7745	-445465	14.4213	49.4869	3.994	61.9931	0.368484	13.6715	1.3781	0.0205684	6.79606	0.204598	2.42687	6.2658	5.17452	0.276896	1.42341	38.8
2000	1091	35.3678	95.238	-443022	14.3469	49.2015	4.001	62.041	0.370321	13.6388	1.381	0.0206811	6.80519	0.205718	2.40262	6.2402	5.18508	0.278256	1.4312	38.6
2000	1090	35.1764	94.7077	-440607	14.2732	48.9194	4.008	62.0887	0.372156	13.606	1.38388	0.0207936	6.81423	0.206838	2.37858	6.21474	5.19554	0.279612	1.43899	38.3
2000	1089	34.9871	94.1833	-438221	14.2004	48.6407	4.015	62.1362	0.373988	13.5732	1.38676	0.0209061	6.82318	0.207957	2.35473	6.18943	5.2059	0.280967	1.44678	38
2000	1088	34.7999	93.6649	-435861	14.1284	48.3652	4.022	62.1836	0.375819	13.5404	1.38963	0.0210185	6.83205	0.209075	2.33109	6.16427	5.21617	0.282318	1.45456	37.8
2000	1087	34.6149	93.1522	-433529	14.0573	48.0928	4.028	62.2309	0.377647	13.5076	1.39249	0.0211309	6.84084	0.210193	2.30765	6.13926	5.22635	0.283667	1.46233	37.5
2000	1086	34.432	92.6453	-431224	13.9869	47.8236	4.035	62.278	0.379473	13.4747	1.39534	0.0212432	6.84954	0.21131	2.2844	6.11439	5.23644	0.285014	1.4701	37.2
2000	1085	34.2511	92.1439	-428944	13.9172	47.5575	4.042	62.325	0.381297	13.4419	1.39818	0.0213553	6.85816	0.212425	2.26135	6.08966	5.24644	0.286359	1.47786	37
2000	1084	34.0722	91.6481	-426691	13.8483	47.2945	4.049	62.3719	0.383118	13.4091	1.40102	0.0214675	6.86669	0.213541	2.23848	6.06508	5.25635	0.287701	1.48562	36.7
2000	1083	33.8953	91.1576	-424462	13.7802	47.0343	4.055	62.4186	0.384938	13.3762	1.40384	0.0215795	6.87514	0.214655	2.21581	6.04064	5.26617	0.28904	1.49338	36.4
2000	1082	33.7203	90.6724	-422258	13.7128	46.7771	4.062	62.4652	0.386755	13.3434	1.40666	0.0216915	6.88351	0.215769	2.19333	6.01634	5.2759	0.290378	1.50113	36.2
2000	1081	33.5473	90.1924	-420078	13.6462	46.5228	4.069	62.5116	0.38857	13.3105	1.40948	0.0218034	6.89179	0.216882	2.17103	5.99218	5.28554	0.291713	1.50887	35.9
2000	1080	33.3761	89.7176	-417922	13.5802	46.2713	4.075	62.558	0.390383	13.2776	1.41228	0.0219152	6.9	0.217995	2.14892	5.96816	5.29509	0.293045	1.51661	35.6
2000	1079	33.2067	89.2478	-415790	13.5149	46.0225	4.082	62.6042	0.392194	13.2448	1.41508	0.022027	6.90811	0.219107	2.12699	5.94427	5.30456	0.294376	1.52435	35.4
2000	1078	33.0391	88.7829	-413681	13.4503	45.7765	4.088	62.6502	0.394003	13.2119	1.41787	0.0221387	6.91615	0.220218	2.10524	5.92052	5.31394	0.295704	1.53208	35.1
2000	1077	32.8734	88.3229	-411594	13.3864	45.5331	4.095	62.6962	0.39581	13.179	1.42065	0.0222504	6.92411	0.221328	2.08366	5.89691	5.32324	0.297029	1.5398	34.8
2000	1076	32.7093	87.8677	-409530	13.3231	45.2924	4.101	62.742	0.397616	13.1462	1.42342	0.022362	6.93198	0.222438	2.06227	5.87343	5.33246	0.298353	1.54753	34.6
2000	1075	32.547	87.4172	-407488	13.2605	45.0542	4.108	62.7877	0.399419	13.1133	1.42618	0.0224735	6.93977	0.223548	2.04105	5.85008	5.34159	0.299674	1.55524	34.3
2000	1074	32.3864	86.9713	-405467	13.1986	44.8186	4.114	62.8333	0.40122	13.0804	1.42894	0.0225849	6.94747	0.224657	2.02001	5.82686	5.35064	0.300993	1.56296	34.1
2000	1073	32.2272	86.5294	-403465	13.1372	44.5851	4.121	62.879	0.403011	13.0476	1.43166	0.0225592	6.95492	0.225766	1.9991	5.80377	5.35964	0.302313	1.57068	33.8
2000	1072	32.0691	86.0908	-401481	13.0762	44.3535	4.127	62.9253	0.404784	13.0148	1.43431	0.0222521	6.9619	0.226879	1.97828	5.78081	5.36863	0.303634	1.57842	33.6
2000	1071	31.9127	85.6567	-399517	13.0159	44.1242	4.134	62.9715	0.406553	12.982	1.43695	0.0219459	6.96879	0.227991	1.95764	5.75797	5.37755	0.304953	1.58616	33.3
2000	1070	31.7578	85.2269	-397573	12.9562	43.8973	4.14	63.0176	0.408318	12.9492	1.43957	0.0216405	6.97559	0.229103	1.93717	5.73526	5.38638	0.306271	1.59389	33
2000	1069	31.6045	84.8014	-395649	12.8971	43.6728	4.146	63.0636	0.410081	12.9164	1.44219	0.021336	6.98229	0.230214	1.91686	5.71267	5.39514	0.307586	1.60162	32.8
2000	1068	31.4528	84.3801	-393745	12.8386	43.4505	4.153	63.1095	0.411841	12.8836	1.4448	0.0210323	6.98892	0.231325	1.89671	5.69021	5.40382	0.308899	1.60935	32.5
2000	1067	31.3025	83.9629	-391860	12.7806	43.2306	4.159	63.1553	0.413598	12.8508	1.44741	0.0207294	6.99545	0.232435	1.87673	5.66788	5.41242	0.31021	1.61707	32.3
2000	1066	31.1538	83.5498	-389994	12.7232	43.0129	4.165	63.2009	0.415353	12.818	1.45	0.0204273	7.00189	0.233545	1.85691	5.64567	5.42095	0.311519	1.6248	32
2000	1065	31.0065	83.1407	-388147	12.6663	42.7973	4.172	63.2465	0.417105	12.7852	1.45258	0.020126	7.00825	0.234654	1.83725	5.62358	5.4294	0.312826	1.63251	31.8
2000	1064	30.8606	82.7356	-386318	12.61	42.584	4.178	63.2919	0.418854	12.7524	1.45516	0.0198253	7.01452	0.235764	1.81775	5.60161	5.43777	0.314131	1.64023	31.5
2000	1063	30.7162	82.3344	-384508	12.5543	42.3727	4.184	63.3373	0.4206	12.7197	1.45773	0.0195254	7.0207	0.236872	1.79841	5.57977	5.44607	0.315434	1.64794	31.3
2000	1062	30.5732	81.937	-382715	12.4991	42.1636	4.19	63.3825	0.422344	12.6869	1.46028	0.0192262	7.02679	0.23798	1.77922	5.55804	5.4543	0.316736	1.65565	31
2000	1061	30.4315	81.5433	-380939	12.4443	41.9565	4.196	63.4277	0.424084	12.6541	1.46283	0.0189276	7.03279	0.239088	1.76019	5.53643	5.46245	0.318035	1.66336	30.8
2000	1060	30.2912	81.1534	-379181	12.3901	41.7515	4.203	63.4727	0.425822	12.6214	1.46537	0.0186296	7.0387	0.240196	1.74131	5.51494	5.47053	0.319332	1.67107	30.5
2000	1059	30.1522	80.7671	-377440	12.3364	41.5485	4.209	63.5177	0.427557	12.5886	1.4679	0.0183323	7.04453	0.241303	1.72258	5.49357	5.47854	0.320628	1.67877	30.3
2000	1058	30.0145	80.3844	-375716	12.2832	41.3474	4.215	63.5625	0.429289	12.5559	1.47042	0.0180355	7.05026	0.24241	1.704	5.47231	5.48647	0.321921	1.68647	30.1
2000	1057	29.8781	80.0053	-374008	12.2305	41.1482	4.221	63.6073	0.431018	12.5231	1.47293	0.0177392	7.05589	0.243516	1.68557	5.45117	5.49434	0.323213	1.69417	29.8
2000	1056	29.743	79.6296	-372316	12.1783	40.951	4.227	63.652	0.432744	12.4904	1.47544	0.0174434	7.06144	0.244623	1.66728	5.43014	5.50214	0.324503	1.70186	29.6
2000	1055	29.6091	79.2574	-370641	12.1265	40.7556	4.233	63.6966	0.434466	12.4577	1.47793	0.0171481	7.0669	0.245728	1.64915	5.40923	5.50987	0.325791	1.70956	29.3
2000	1054	29.4765	78.8885	-368981	12.0753	40.5621	4.239	63.7411	0.436186	12.4249	1.48041	0.0168533	7.07226	0.246834	1.63115	5.38843	5.51753	0.327077	1.71725	29.1
2000	1053	29.3451	78.523	-367336	12.0244	40.3704	4.245	63.7855	0.437902	12.3922	1.48288	0.0165589	7.07753	0.24794	1.6133	5.36774	5.52512	0.328362	1.72494	28.8
2000	1052	29.2149	78.1608	-365707	11.9741	40.1805	4.251	63.8298	0.439615	12.3595	1.48535	0.0162648	7.0827	0.249045	1.5956	5.34716	5.53264	0.329645	1.73263	28.6
2000	1051	29.0858	77.8018	-364093	11.9241	39.9924	4.257	63.8741	0.441325	12.3268	1.4878	0.0159711	7.08778	0.25015	1.57803	5.32669	5.5401	0.330926	1.74032	28.4
2000	1050	28.9579	77.4459	-362494	11.8747	39.806	4.262	63.9182	0.443032	12.2942	1.49024	0.0156777	7.09277	0.251255	1.5606	5.30633	5.54749	0.332205	1.748	28.1
2000	1049	28.8312	77.0933	-360909	11.8256	39.6213	4.268	63.9623	0.444735	12.2615	1.49268	0.0153845	7.09766	0.252359	1.54331	5.28608	5.55482	0.333483	1.75569	27.9
2000	1048	28.7055	76.7437	-359339	11.777	39.4383	4.274	64.0063	0.446434	12.2288	1.4951	0.0150916	7.10245	0.253464	1.52616	5.26594	5.56208	0.334759	1.76337	27.6
2000	1047	28.581	76.3971	-357782	11.7288	39.257	4.28	64.0503	0.44813	12.1962	1.49751	0.0147989	7.10714	0.254568	1.50914	5.2459	5.56928	0.336034	1.77106	27.4
2000	1046	28.4576	76.0535	-356240	11.681	39.0772	4.286	64.0941	0.449821	12.1635	1.49991	0.0145064	7.11174	0.255672	1.49226	5.22597	5.57642	0.337306	1.77874	27.2
2000	1045	28.3352	75.7129	-354712	11.6336	38.8991	4.291	64.1379	0.451509	12.1309	1.5023	0.0142139	7.11624	0.256776	1.47551	5.20614	5.58349	0.338578	1.78642	26.9
2000	1044	28.2139	75.3752	-353197	11.5866	38.7226	4.297	64.1816	0.453193	12.0983	1.50468	0.0139216	7.12063	0.25788	1.45889	5.18642	5.5905	0.339847	1.7941	26.7
2000	1043	28.0936	75.0404	-351696	11.5401	38.5477	4.303	64.2253	0.454873	12.0657	1.50705	0.0136294	7.12493	0.258984	1.44241	5.1668	5.59745	0.341115	1.80178	26.5
2000	1042	27.9744	74.7084	-350207	11.4939	38.3743	4.308	64.2689	0.456549	12.0331	1.50941	0.0133371	7.12912	0.260088	1.42606	5.14729	5.60434	0.342382	1.80946	26.2
2000	1041	27.8562	74.3792	-348732	11.4481	38.2024	4.314	64.3124	0.45822	12.0006	1.51175	0.0130449	7.13321	0.261192	1.40983	5.12787	5.61117	0.343647	1.81714	26
2000	1040	27.739	74.0527	-347269	11.4027	38.032	4.32	64.3558	0.459886	11.968	1.51409	0.0127526	7.13719	0.262296	1.39373	5.10856	5.61794	0.34491	1.82482	25.8
2000	1039	27.6227	73.729	-345819	11.3576	37.8631	4.325	64.3992	0.461548	11.9355	1.51641	0.0124603	7.14107	0.263399	1.37776	5.08934	5.62465	0.346173	1.83249	25.5
2000	1038	27.5075	73.4079	-344382	11.3129	37.6956	4.331	64.4426	0.463205	11.9029	1.51872	0.0121679	7.14484	0.264503	1.36192	5.07023	5.6313	0.347433	1.84017	25.3
2000	1037	27.3932	73.0894	-342957	11.2686	37.5296	4.336	64.4859	0.464856	11.8704	1.52101	0.0118754	7.14851	0.265607	1.3462	5.05121	5.6379	0.348692	1.84785	25.1
2000	1036	27.2798	72.7736	-341544	11.2247	37.3649	4.342	64.5291	0.466502	11.8379	1.5233	0.0115828	7.15206	0.266711	1.3306	5.03229	5.64444	0.34995	1.85553	24.9
2000	1035	27.1673	72.4603	-340143	11.1811	37.2017	4.347	64.5723	0.468143	11.8054	1.52557	0.01129	7.1555	0.267815	1.31512	5.01347	5.65092	0.351207	1.86321	24.6
2000	1034	27.0558	72.1495	-338753	11.1378	37.0398	4.353	64.6154	0.469778	11.773	1.52782	0.0109971	7.15883	0.268919	1.29977	4.99475	5.65735	0.352462	1.87089	24.4
2000	1033	26.9452	71.8412	-337375	11.0949	36.8793	4.358	64.6585	0.471406	11.7405	1.53007	0.010704	7.16205	0.270023	1.28454	4.97611	5.66372	0.353716	1.87858	24.2
2000	1032	26.8354	71.5353	-336009	11.0524	36.7201	4.364	64.7016	0.473029	11.7081	1.5323	0.0104109	7.16515	0.271127	1.26943	4.95758	5.67004	0.354968	1.88626	24
2000	1031	26.7265	71.2319	-334654	11.0101	36.5622	4.369	64.7446	0.474644	11.6757	1.53451	0.0101176	7.16814	0.272232	1.25444	4.93914	5.67631	0.35622	1.89394	23.7
2000	1030	26.6185	70.9308	-333310	10.9682	36.4057	4.375	64.7876	0.476253	11.6433	1.53671	0.00982413	7.171	0.273336	1.23957	4.92079	5.68252	0.35747	1.90163	23.5
2000	1029	26.5114	70.6321	-331977	10.9267	36.2503	4.38	64.8305	0.477854	11.6109	1.5389	0.00953062	7.17375	0.274441	1.22481	4.90253	5.68868	0.358719	1.90931	23.3
2000	1028	26.4051	70.3357	-330655	10.8854	36.0963	4.385	64.8735	0.479447	11.5786	1.54107	0.00923707	7.17637	0.275546	1.21017	4.88436	5.69479	0.359966	1.917	23.1
2000	1027	26.2996	70.0416	-329343	10.8445	35.9435	4.391	64.9163	0.481032	11.5463	1.54322	0.00894352	7.17886	0.276651	1.19564	4.86629	5.70085	0.361213	1.92469	22.9
2000	1026	26.1949	69.7497	-328042	10.8039	35.7919	4.396	64.9592	0.482609	11.514	1.54536	0.00865004	7.18124	0.277757	1.18123	4.8483	5.70686	0.362458	1.93238	22.6
2000	1025	26.091	69.4601	-326751	10.7636	35.6415	4.401	65.002	0.484176	11.4817	1.54748	0.00835669	7.18348	0.278863	1.16694	4.8304	5.71281	0.363703	1.94008	22.4
2000	1024	25.9879	69.1726	-325471	10.7236	35.4923	4.407	65.0449	0.485734	11.4494	1.54959	0.00806355	7.18559	0.279969	1.15275	4.81259	5.71872	0.364946	1.94777	22.2
2000	1023	25.8856	68.8873	-324201	10.6838	35.3442	4.412	65.0877	0.487283	11.4171	1.55168	0.00777074	7.18757	0.281076	1.13868	4.79487	5.72459	0.366188	1.95547	22
2000	1022	25.784	68.6041	-322940	10.6444	35.1973	4.417	65.1305	0.48882	11.3849	1.55375	0.00747837	7.18942	0.282183	1.12472	4.77724	5.7304	0.36743	1.96317	21.8
2000	1021	25.6833	68.323	-321690	10.6053	35.0516	4.422	65.1733	0.490347	11.3527	1.5558	0.00718657	7.19113	0.28329	1.11088	4.75969	5.73617	0.36867	1.97088	21.6
2000	1020	25.5832	68.0439	-320449	10.5665	34.9069	4.428	65.2161	0.491862	11.3205	1.55783	0.00689549	7.1927	0.284398	1.09714	4.74222	5.74189	0.369909	1.97858	21.3
2000	1019	25.4839	67.7669	-319217	10.5279	34.7634	4.433	65.2589	0.493365	11.2883	1.55984	0.00660529	7.19412	0.285506	1.08351	4.72484	5.74756	0.371148	1.9863	21.1
2000	1018	25.3853	67.4919	-317995	10.4897	34.6209	4.438	65.3017	0.494855	11.2562	1.56184	0.00631619	7.19541	0.286615	1.06999	4.70755	5.75319	0.372386	1.99401	20.9
2000	1017	25.2874	67.2189	-316783	10.4517	34.4795	4.443	65.3445	0.496332	11.2241	1.56381	0.00602837	7.19654	0.287725	1.05657	4.69033	5.75878	0.373623	2.00173	20.7
2000	1016	25.1902	66.9478	-315579	10.4139	34.3391	4.448	65.3873	0.497794	11.192	1.56577	0.00574208	7.19753	0.288835	1.04327	4.6732	5.76432	0.374859	2.00945	20.5
2000	1015	25.0937	66.6786	-314385	10.3765	34.1998	4.453	65.4301	0.499241	11.1599	1.5677	0.00545757	7.19837	0.289945	1.03007	4.65615	5.76982	0.376095	2.01718	20.3
2000	1014	24.9979	66.4113	-313199	10.3393	34.0615	4.459	65.473	0.500672	11.1278	1.56961	0.00517512	7.19905	0.291057	1.01698	4.63918	5.77528	0.37733	2.02491	20.1
2000	1013	24.9028	66.1459	-312022	10.3024	33.9243	4.464	65.5158	0.502087	11.0958	1.5715	0.00489503	7.19957	0.292169	1.00399	4.62229	5.7807	0.378564	2.03265	19.9
2000	1012	24.8083	65.8823	-310854	10.2657	33.788	4.469	65.5587	0.503484	11.0637	1.57336	0.00461763	7.19993	0.293281	0.99111	4.60547	5.78607	0.379798	2.04039	19.7
2000	1011	24.7145	65.6206	-309694	10.2293	33.6527	4.474	65.6017	0.504863	11.0318	1.5752	0.00434328	7.20013	0.294395	0.978333	4.58874	5.79141	0.381031	2.04813	19.5
2000	1010	24.6213	65.3606	-308543	10.1931	33.5183	4.479	65.6446	0.506222	10.9998	1.57702	0.00407235	7.20016	0.295509	0.96566	4.57208	5.7967	0.382263	2.05588	19.3
2000	1009	24.5287	65.1024	-307400	10.1572	33.3849	4.484	65.6877	0.507561	10.9678	1.57881	0.00380526	7.20002	0.296624	0.95309	4.5555	5.80196	0.383495	2.06364	19.1
2000	1008	24.4368	64.8459	-306266	10.1215	33.2525	4.489	65.7307	0.508878	10.9359	1.58057	0.00354243	7.19971	0.29774	0.940623	4.53899	5.80717	0.384727	2.07141	18.9
2000	1007	24.3455	64.5911	-305139	10.0861	33.121	4.494	65.7738	0.510173	10.904	1.58231	0.00328432	7.19922	0.298857	0.928259	4.52256	5.81235	0.385958	2.07917	18.7
2000	1006	24.2548	64.3381	-304021	10.0509	32.9904	4.499	65.817	0.511444	10.8721	1.58402	0.00303141	7.19855	0.299974	0.915997	4.50621	5.8175	0.387189	2.08695	18.5
2000	1005	24.1647	64.0866	-302910	10.0159	32.8606	4.504	65.8602	0.51269	10.8403	1.58571	0.00278422	7.1977	0.301093	0.903837	4.48992	5.8226	0.38842	2.09473	18.3
2000	1004	24.0751	63.8369	-301807	9.98115	32.7318	4.509	65.9035	0.513909	10.8084	1.58736	0.00254329	7.19666	0.302213	0.891778	4.47371	5.82767	0.38965	2.10252	18.1
2000	1003	23.9862	63.5887	-300712	9.94664	32.6038	4.514	65.9469	0.515102	10.7766	1.58899	0.00230917	7.19543	0.303333	0.87982	4.45757	5.83271	0.39088	2.11032	17.9
2000	1002	23.8978	63.3422	-299625	9.91236	32.4767	4.519	65.9903	0.516265	10.7449	1.59058	0.00208245	7.19401	0.304455	0.867963	4.4415	5.83771	0.39211	2.11812	17.7
2000	1001	23.81	63.0972	-298544	9.8783	32.3505	4.524	66.0339	0.517398	10.7131	1.59215	0.00186374	7.19239	0.305578	0.856206	4.42551	5.84268	0.39334	2.12594	17.5
2000	1000	23.7227	62.8537	-297472	9.84445	32.2251	4.529	66.0775	0.518499	10.6814	1.59368	0.00165367	7.19056	0.306702	0.844549	4.40958	5.84762	0.39457	2.13376	17.3
2000	999	23.636	62.6118	-296406	9.81083	32.1005	4.534	66.1212	0.519566	10.6497	1.59518	0.00145289	7.18853	0.307827	0.832993	4.39372	5.85252	0.395799	2.14158	17.1
2000	998	23.5498	62.3714	-295348	9.77741	31.9767	4.539	66.165	0.520598	10.618	1.59664	0.00126207	7.18628	0.308954	0.821535	4.37792	5.85739	0.397029	2.14942	16.9
2000	997	23.4642	62.1324	-294297	9.7442	31.8537	4.544	66.2089	0.521592	10.5863	1.59807	0.0010819	7.18381	0.310082	0.810177	4.3622	5.86223	0.398259	2.15727	16.7
2000	996	23.379	61.895	-293253	9.7112	31.7315	4.549	66.253	0.522546	10.5547	1.59947	0.000913073	7.18112	0.311211	0.798919	4.34654	5.86704	0.399489	2.16512	16.5
2000	995	23.2944	61.6589	-292216	9.67841	31.61	4.554	66.2971	0.523458	10.5231	1.60082	0.000756311	7.17819	0.312342	0.78776	4.33094	5.87182	0.400719	2.17299	16.4
2000	994	23.2103	61.4242	-291185	9.64581	31.4893	4.558	66.3415	0.524323	10.4915	1.60213	0.000612333	7.17502	0.313474	0.7767	4.31541	5.87657	0.40195	2.18087	16.2
2000	993	23.1266	61.1909	-290162	9.61341	31.3693	4.563	66.386	0.525138	10.4599	1.6034	0.000481866	7.17159	0.314608	0.765739	4.29994	5.8813	0.403181	2.18876	16
2000	992	23.0434	60.9589	-289144	9.58119	31.2501	4.568	66.4306	0.525897	10.4284	1.60462	0.000365636	7.16788	0.315744	0.754879	4.28454	5.88601	0.404413	2.19666	15.8
2000	991	22.9607	60.7282	-288133	9.54917	31.1315	4.573	66.4756	0.526592	10.3968	1.60579	0.000264362	7.16387	0.316882	0.744119	4.26919	5.89069	0.405646	2.20458	15.6
2000	990	22.8783	60.4987	-287128	9.51732	31.0136	4.578	66.5207	0.527211	10.3653	1.6069	0.000178745	7.15951	0.318022	0.733462	4.2539	5.89535	0.40688	2.21251	15.4
2000	989	22.7964	60.2703	-286129	9.48564	30.8963	4.583	66.5663	0.527733	10.3339	1.60793	0.00010945	7.15474	0.319165	0.722909	4.23867	5.9	0.408116	2.22046	15.3
2000	988	22.7147	60.0428	-285135	9.45409	30.7794	4.588	66.6125	0.528114	10.3024	1.60886	5.70691e-05	7.14939	0.320312	0.712468	4.22348	5.90466	0.409356	2.22845	15.1
2000	987	22.6331	59.8157	-284145	9.42264	30.6627	4.593	66.6597	0.528246	10.2709	1.60961	2.20243e-05	7.14309	0.321467	0.702152	4.20832	5.90935	0.410602	2.23648	14.9
2000	986	22.5562	59.6	-283190	9.39243	30.5523	4.597	66.6969	0.53046	10.2396	1.61179	0	7.14422	0.322563	0.691617	4.19358	5.91333	0.411778	2.24411	14.7
2000	985	22.4661	59.3525	-282146	9.35897	30.4245	4.604	66.7675	0.525653	10.208	1.60913	0	7.12011	0.323858	0.682211	4.17774	5.91953	0.413187	2.25311	14.6
2000	984	22.3723	59.0965	-281082	9.32468	30.292	4.612	66.8486	0.518629	10.1763	1.60489	0	7.08784	0.325216	0.673245	4.16161	5.92641	0.41467	2.26256	14.5
2000	983	22.2793	58.8428	-280027	9.2907	30.1608	4.62	66.9295	0.511688	10.1446	1.60066	0	7.05566	0.326572	0.664379	4.14557	5.93321	0.416148	2.27199	14.4
2000	982	22.1873	58.5914	-278981	9.25703	30.0308	4.628	67.0101	0.504827	10.113	1.59642	0	7.02358	0.327927	0.655613	4.12962	5.93993	0.417623	2.28142	14.3
2000	981	22.0961	58.3423	-277946	9.22365	29.902	4.636	67.0904	0.498046	10.0813	1.59218	0	6.9916	0.32928	0.646944	4.11376	5.94658	0.419095	2.29083	14.2
2000	980	22.0058	58.0954	-276920	9.19057	29.7745	4.644	67.1704	0.491344	10.0497	1.58794	0	6.9597	0.330631	0.638372	4.09799	5.95316	0.420563	2.30023	14.1
2000	979	21.9163	57.8508	-275904	9.15778	29.6482	4.652	67.2501	0.48472	10.018	1.5837	0	6.9279	0.331981	0.629896	4.08231	5.95966	0.422027	2.30963	13.9
2000	978	21.8277	57.6084	-274896	9.12528	29.523	4.659	67.3296	0.478173	9.98643	1.57946	0	6.89619	0.33333	0.621514	4.06672	5.96609	0.423488	2.31901	13.8
2000	977	21.7398	57.3682	-273898	9.09307	29.399	4.667	67.4088	0.471702	9.95484	1.57522	0	6.86456	0.334677	0.613225	4.05121	5.97244	0.424945	2.32838	13.7
2000	976	21.6528	57.13	-272909	9.06113	29.2761	4.675	67.4877	0.465307	9.92327	1.57098	0	6.83302	0.336022	0.605028	4.03579	5.97873	0.426398	2.33774	13.6
2000	975	21.5665	56.894	-271928	9.02947	29.1544	4.682	67.5664	0.458986	9.89172	1.56674	0	6.80157	0.337366	0.596923	4.02045	5.98494	0.427849	2.34709	13.5
2000	974	21.481	56.66	-270957	8.99808	29.0338	4.69	67.6448	0.452739	9.86018	1.56249	0	6.77021	0.338709	0.588908	4.00519	5.99108	0.429295	2.35643	13.4
2000	973	21.3963	56.4281	-269994	8.96696	28.9143	4.697	67.7229	0.446564	9.82867	1.55825	0	6.73893	0.340049	0.580981	3.99002	5.99716	0.430738	2.36576	13.3
2000	972	21.3124	56.1982	-269039	8.9361	28.7958	4.704	67.8007	0.440462	9.79717	1.554	0	6.70773	0.341389	0.573143	3.97493	6.00316	0.432178	2.37508	13.2
2000	971	21.2292	55.9703	-268093	8.90551	28.6784	4.712	67.8784	0.434431	9.7657	1.54976	0	6.67662	0.342727	0.565392	3.95993	6.0091	0.433615	2.38439	13.1
2000	970	21.1467	55.7443	-267155	8.87517	28.5621	4.719	67.9557	0.428471	9.73425	1.54551	0	6.64559	0.344064	0.557726	3.945	6.01497	0.435048	2.39368	13
2000	969	21.065	55.5203	-266225	8.84508	28.4468	4.726	68.0328	0.42258	9.70281	1.54126	0	6.61464	0.345399	0.550146	3.93015	6.02077	0.436477	2.40297	12.9
2000	968	20.9839	55.2982	-265304	8.81525	28.3326	4.734	68.1096	0.416759	9.6714	1.53701	0	6.58378	0.346733	0.54265	3.91538	6.02651	0.437903	2.41225	12.8
2000	967	20.9036	55.0779	-264390	8.78566	28.2193	4.741	68.1862	0.411005	9.64002	1.53275	0	6.55299	0.348065	0.535237	3.90069	6.03218	0.439326	2.42152	12.7
2000	966	20.824	54.8595	-263484	8.75632	28.107	4.748	68.2626	0.40532	9.60866	1.5285	0	6.52228	0.349396	0.527906	3.88607	6.03778	0.440746	2.43078	12.6
2000	965	20.745	54.6429	-262586	8.72722	27.9957	4.755	68.3387	0.399701	9.57732	1.52424	0	6.49165	0.350725	0.520657	3.87153	6.04332	0.442162	2.44003	12.5
2000	964	20.6668	54.4282	-261695	8.69835	27.8854	4.762	68.4145	0.394148	9.546	1.51998	0	6.4611	0.352053	0.513487	3.85707	6.0488	0.443575	2.44927	12.4
2000	963	20.5892	54.2152	-260812	8.66972	27.776	4.769	68.4901	0.38866	9.51471	1.51572	0	6.43063	0.35338	0.506398	3.84268	6.05421	0.444984	2.4585	12.3
2000	962	20.5123	54.004	-259937	8.64132	27.6676	4.776	68.5655	0.383237	9.48345	1.51145	0	6.40023	0.354705	0.499387	3.82837	6.05956	0.446391	2.46772	12.2
2000	961	20.436	53.7945	-259068	8.61315	27.5601	4.783	68.6406	0.377878	9.45221	1.50718	0	6.36991	0.356029	0.492454	3.81413	6.06485	0.447794	2.47693	12.1
2000	960	20.3603	53.5867	-258207	8.5852	27.4535	4.789	68.7155	0.372583	9.421	1.50292	0	6.33966	0.357352	0.485597	3.79996	6.07008	0.449193	2.48613	12
2000	959	20.2853	53.3806	-257353	8.55748	27.3478	4.796	68.7902	0.36735	9.38982	1.49864	0	6.30949	0.358673	0.478817	3.78586	6.07524	0.45059	2.49532	11.9
2000	958	20.211	53.1761	-256506	8.52998	27.243	4.803	68.8646	0.362179	9.35866	1.49437	0	6.27939	0.359993	0.472112	3.77183	6.08035	0.451983	2.50451	11.8
2000	957	20.1372	52.9734	-255666	8.50269	27.1391	4.81	68.9388	0.35707	9.32753	1.49009	0	6.24937	0.361312	0.465482	3.75788	6.08539	0.453373	2.51368	11.7
2000	956	20.0641	52.7722	-254833	8.47562	27.036	4.816	69.0128	0.352021	9.29643	1.48581	0	6.21942	0.362629	0.458926	3.74399	6.09038	0.45476	2.52284	11.6
2000	955	19.9915	52.5726	-254007	8.44876	26.9338	4.823	69.0865	0.347033	9.26535	1.48153	0	6.18954	0.363945	0.452442	3.73017	6.0953	0.456144	2.532	11.5
2000	954	19.9196	52.3747	-253187	8.42211	26.8325	4.829	69.1601	0.342104	9.23431	1.47724	0	6.15974	0.365259	0.446031	3.71643	6.10017	0.457524	2.54114	11.4
2000	953	19.8482	52.1783	-252374	8.39566	26.732	4.836	69.2333	0.337234	9.2033	1.47295	0	6.13	0.366572	0.439691	3.70274	6.10498	0.458902	2.55028	11.3
2000	952	19.7775	51.9834	-251568	8.36942	26.6323	4.842	69.3064	0.332422	9.17231	1.46866	0	6.10034	0.367884	0.433421	3.68913	6.10973	0.460276	2.55941	11.2
2000	951	19.7072	51.7901	-250768	8.34338	26.5334	4.849	69.3793	0.327668	9.14136	1.46437	0	6.07075	0.369195	0.427222	3.67558	6.11442	0.461647	2.56852	11.1
2000	950	19.6376	51.5982	-249975	8.31754	26.4353	4.855	69.4519	0.322971	9.11044	1.46007	0	6.04123	0.370504	0.421092	3.6621	6.11906	0.463014	2.57763	11.1
2000	949	19.5685	51.4079	-249187	8.2919	26.3381	4.861	69.5243	0.31833	9.07955	1.45577	0	6.01178	0.371812	0.41503	3.64868	6.12364	0.464379	2.58673	11
2000	948	19.5	51.219	-248406	8.26645	26.2416	4.868	69.5965	0.313745	9.04869	1.45146	0	5.9824	0.373118	0.409037	3.63532	6.12817	0.465741	2.59582	10.9
2000	947	19.432	51.0316	-247631	8.2412	26.1459	4.874	69.6685	0.309216	9.01786	1.44715	0	5.95308	0.374424	0.40311	3.62203	6.13264	0.467099	2.6049	10.8
2000	946	19.3646	50.8457	-246862	8.21613	26.0509	4.88	69.7402	0.304742	8.98706	1.44284	0	5.92384	0.375728	0.39725	3.6088	6.13705	0.468455	2.61397	10.7
2000	945	19.2977	50.6611	-246100	8.19125	25.9567	4.886	69.8118	0.300321	8.9563	1.43853	0	5.89467	0.37703	0.391455	3.59564	6.14141	0.469807	2.62304	10.6
2000	944	19.2313	50.478	-245343	8.16656	25.8633	4.892	69.8831	0.295955	8.92557	1.43421	0	5.86556	0.378332	0.385726	3.58253	6.14572	0.471156	2.63209	10.5
2000	943	19.1654	50.2962	-244592	8.14205	25.7706	4.898	69.9543	0.291641	8.89488	1.42989	0	5.83652	0.379632	0.380061	3.56949	6.14998	0.472502	2.64114	10.4
2000	942	19.1001	50.1158	-243846	8.11772	25.6786	4.904	70.0252	0.287381	8.86421	1.42556	0	5.80755	0.380931	0.37446	3.5565	6.15418	0.473845	2.65017	10.3
2000	941	19.0352	49.9367	-243107	8.09357	25.5873	4.91	70.0959	0.283172	8.83359	1.42124	0	5.77865	0.382228	0.368923	3.54358	6.15833	0.475185	2.6592	10.2
2000	940	18.9709	49.759	-242373	8.0696	25.4968	4.916	70.1664	0.279015	8.803	1.4169	0	5.74981	0.383525	0.363448	3.53071	6.16242	0.476522	2.66822	10.1
2000	939	18.9071	49.5827	-241645	8.0458	25.407	4.922	70.2367	0.274909	8.77244	1.41257	0	5.72104	0.38482	0.358034	3.51791	6.16647	0.477856	2.67723	10
2000	938	18.8437	49.4076	-240922	8.02218	25.3178	4.928	70.3068	0.270853	8.74192	1.40823	0	5.69234	0.386113	0.352683	3.50516	6.17046	0.479187	2.68623	9.9
2000	937	18.7808	49.2338	-240205	7.99873	25.2294	4.934	70.3767	0.266848	8.71143	1.40389	0	5.6637	0.387406	0.347392	3.49246	6.1744	0.480515	2.69522	9.9
2000	936	18.7185	49.0613	-239493	7.97544	25.1416	4.94	70.4464	0.262892	8.68098	1.39954	0	5.63513	0.388697	0.342161	3.47983	6.1783	0.481839	2.7042	9.8
2000	935	18.6565	48.89	-238787	7.95233	25.0545	4.945	70.5159	0.258985	8.65057	1.39519	0	5.60663	0.389987	0.336989	3.46725	6.18214	0.483161	2.71318	9.7
2000	934	18.5951	48.72	-238086	7.92938	24.968	4.951	70.5852	0.255127	8.62019	1.39083	0	5.57819	0.391276	0.331877	3.45473	6.18593	0.48448	2.72214	9.6
2000	933	18.5341	48.5513	-237390	7.90659	24.8822	4.957	70.6543	0.251317	8.58985	1.38648	0	5.54982	0.392563	0.326824	3.44226	6.18967	0.485796	2.7311	9.5
2000	932	18.4736	48.3837	-236699	7.88397	24.7971	4.962	70.7232	0.247554	8.55955	1.38212	0	5.52151	0.393849	0.321828	3.42984	6.19337	0.487108	2.74005	9.4
2000	931	18.4135	48.2174	-236013	7.8615	24.7126	4.968	70.7919	0.243838	8.52929	1.37775	0	5.49327	0.395134	0.316889	3.41748	6.19701	0.488418	2.74898	9.3
2000	930	18.3539	48.0523	-235333	7.8392	24.6287	4.973	70.8604	0.240169	8.49906	1.37338	0	5.4651	0.396417	0.312008	3.40517	6.20061	0.489725	2.75791	9.2
2000	929	18.2947	47.8883	-234657	7.81705	24.5455	4.979	70.9288	0.236547	8.46888	1.36901	0	5.43699	0.3977	0.307182	3.39292	6.20416	0.491029	2.76684	9.1
2000	928	18.236	47.7255	-233987	7.79506	24.4629	4.984	70.9969	0.232969	8.43873	1.36463	0	5.40894	0.398981	0.302413	3.38071	6.20766	0.492329	2.77575	9.1
2000	927	18.1777	47.5639	-233321	7.77322	24.3809	4.99	71.0648	0.229438	8.40862	1.36025	0	5.38096	0.40026	0.297698	3.36856	6.21112	0.493627	2.78465	9
2000	926	18.1198	47.4034	-232660	7.75153	24.2995	4.995	71.1326	0.225951	8.37855	1.35587	0	5.35304	0.401539	0.293039	3.35646	6.21453	0.494922	2.79354	8.9
2000	925	18.0624	47.2441	-232004	7.72999	24.2187	5	71.2001	0.222508	8.34852	1.35148	0	5.32519	0.402816	0.288433	3.34441	6.21789	0.496214	2.80243	8.8
2000	924	18.0053	47.0858	-231353	7.7086	24.1385	5.006	71.2675	0.219109	8.31853	1.34709	0	5.29741	0.404092	0.283881	3.33241	6.22121	0.497502	2.81131	8.7
2000	923	17.9487	46.9287	-230706	7.68736	24.0589	5.011	71.3346	0.215754	8.28858	1.3427	0	5.26969	0.405366	0.279383	3.32046	6.22448	0.498788	2.82017	8.6
2000	922	17.8925	46.7726	-230064	7.66627	23.9798	5.016	71.4016	0.212441	8.25868	1.3383	0	5.24203	0.40664	0.274937	3.30855	6.2277	0.500071	2.82903	8.6
2000	921	17.8367	46.6177	-229427	7.64532	23.9014	5.021	71.4684	0.209172	8.22881	1.3339	0	5.21444	0.407912	0.270544	3.2967	6.23089	0.501351	2.83788	8.5
2000	920	17.7813	46.4638	-228794	7.62451	23.8235	5.026	71.535	0.205944	8.19898	1.32949	0	5.18692	0.409183	0.266202	3.28489	6.23402	0.502628	2.84672	8.4
2000	919	17.7263	46.311	-228165	7.60384	23.7461	5.031	71.6014	0.202758	8.1692	1.32508	0	5.15945	0.410452	0.261911	3.27313	6.23711	0.503902	2.85556	8.3
2000	918	17.6717	46.1592	-227542	7.58331	23.6694	5.036	71.6677	0.199614	8.13946	1.32067	0	5.13206	0.41172	0.257671	3.26142	6.24016	0.505173	2.86438	8.2
2000	917	17.6175	46.0085	-226922	7.56292	23.5931	5.041	71.7337	0.19651	8.10976	1.31626	0	5.10473	0.412987	0.253482	3.24976	6.24317	0.506441	2.87319	8.1
2000	916	17.5637	45.8588	-226307	7.54267	23.5175	5.046	71.7996	0.193447	8.0801	1.31184	0	5.07746	0.414253	0.249343	3.23814	6.24613	0.507706	2.882	8
2000	915	17.5102	45.7101	-225696	7.52255	23.4423	5.051	71.8653	0.190424	8.05049	1.30741	0	5.05026	0.415517	0.245253	3.22656	6.24904	0.508968	2.89079	8
2000	914	17.4572	45.5624	-225090	7.50257	23.3677	5.056	71.9308	0.187441	8.02092	1.30299	0	5.02312	0.41678	0.241212	3.21503	6.25192	0.510228	2.89958	7.9
2000	913	17.4045	45.4158	-224487	7.48273	23.2936	5.061	71.9961	0.184497	7.99139	1.29856	0	4.99605	0.418042	0.237219	3.20354	6.25475	0.511484	2.90836	7.8
2000	912	17.3522	45.2701	-223889	7.46301	23.2201	5.066	72.0612	0.181592	7.96191	1.29412	0	4.96904	0.419303	0.233275	3.1921	6.25754	0.512737	2.91713	7.7
2000	911	17.3002	45.1254	-223295	7.44342	23.147	5.071	72.1262	0.178725	7.93247	1.28969	0	4.9421	0.420562	0.229379	3.1807	6.26029	0.513988	2.92589	7.6
2000	910	17.2486	44.9816	-222706	7.42396	23.0745	5.075	72.191	0.175897	7.90307	1.28525	0	4.91522	0.42182	0.225529	3.16935	6.263	0.515235	2.93464	7.6
2000	909	17.1974	44.8388	-222120	7.40463	23.0025	5.08	72.2556	0.173106	7.87372	1.2808	0	4.88841	0.423076	0.221727	3.15804	6.26567	0.51648	2.94338	7.5
2000	908	17.1465	44.697	-221538	7.38543	22.931	5.085	72.32	0.170353	7.84441	1.27636	0	4.86167	0.424331	0.217971	3.14676	6.26829	0.517721	2.95212	7.4
2000	907	17.096	44.5561	-220961	7.36636	22.8599	5.089	72.3843	0.167636	7.81515	1.27191	0	4.83499	0.425585	0.214261	3.13554	6.27088	0.51896	2.96084	7.3
2000	906	17.0458	44.4161	-220387	7.3474	22.7894	5.094	72.4483	0.164956	7.78593	1.26745	0	4.80837	0.426838	0.210597	3.12435	6.27342	0.520196	2.96955	7.2
2000	905	16.996	44.2771	-219817	7.32857	22.7194	5.098	72.5122	0.162312	7.75676	1.263	0	4.78182	0.428089	0.206978	3.1132	6.27592	0.521429	2.97826	7.2
2000	904	16.9465	44.139	-219251	7.30986	22.6498	5.103	72.5759	0.159704	7.72763	1.25854	0	4.75534	0.429339	0.203404	3.10209	6.27839	0.522658	2.98696	7.1
2000	903	16.8974	44.0017	-218689	7.29128	22.5807	5.107	72.6395	0.157132	7.69855	1.25408	0	4.72892	0.430588	0.199874	3.09103	6.28081	0.523885	2.99564	7
2000	902	16.8486	43.8654	-218131	7.27281	22.5121	5.112	72.7029	0.154594	7.66952	1.24961	0	4.70257	0.431835	0.196388	3.08	6.2832	0.525109	3.00432	6.9
2000	901	16.8001	43.7299	-217576	7.25446	22.444	5.116	72.766	0.152091	7.64053	1.24515	0	4.67629	0.433081	0.192946	3.06901	6.28555	0.52633	3.01299	6.9
2000	900	16.752	43.5954	-217025	7.23623	22.3763	5.121	72.8291	0.149623	7.61159	1.24068	0	4.65007	0.434326	0.189547	3.05806	6.28785	0.527548	3.02165	6.8
clinopyroxene_1	thermodynamic	data	and	composition:
Pressure	Temperature	mass	S	H	V	Cp	structure	formula	SiO2	TiO2	Al2O3	Fe2O3	Cr2O3	FeO	MnO	MgO	CaO	Na2O	K2O	H2O
2000	1175	0.200308	0.480589	-2505.02	0.061921	0.246888	cpx	Na0.01Ca0.28Fe''0.33Mg1.31Fe'''0.02Ti0.00Al0.13Si1.93O6	53.5595	0.027695	2.95818	0.773142	0	11.0334	0	24.3345	7.22798	0.0856469	0	0
2000	1174	0.210956	0.505893	-2636.83	0.065193	0.259911	cpx	Na0.01Ca0.28Fe''0.33Mg1.30Fe'''0.02Ti0.00Al0.13Si1.93O6	53.5422	0.0280717	2.95491	0.776182	0	11.0987	0	24.2842	7.22977	0.0860015	0	0
2000	1173	0.205839	0.493387	-2571.56	0.063593	0.253509	cpx	Na0.01Ca0.28Fe''0.34Mg1.30Fe'''0.02Ti0.00Al0.13Si1.93O6	53.5249	0.0284487	2.95165	0.779216	0	11.164	0	24.2342	7.2313	0.0863533	0	0
2000	1172	0.200906	0.481332	-2508.65	0.06205	0.247338	cpx	Na0.01Ca0.28Fe''0.34Mg1.30Fe'''0.02Ti0.00Al0.13Si1.93O6	53.5076	0.028826	2.94841	0.782243	0	11.2294	0	24.1842	7.2326	0.0867021	0	0
2000	1171	0.196148	0.469707	-2447.98	0.060562	0.241387	cpx	Na0.01Ca0.28Fe''0.34Mg1.30Fe'''0.02Ti0.00Al0.13Si1.93O6	53.4903	0.0292035	2.94518	0.785263	0	11.2949	0	24.1344	7.23366	0.0870481	0	0
2000	1170	0.191556	0.458492	-2389.45	0.059127	0.235645	cpx	Na0.01Ca0.28Fe''0.34Mg1.30Fe'''0.02Ti0.00Al0.13Si1.93O6	53.4731	0.0295814	2.94196	0.788278	0	11.3605	0	24.0847	7.23447	0.0873913	0	0
2000	1169	0.187123	0.447666	-2332.95	0.057741	0.230102	cpx	Na0.01Ca0.28Fe''0.34Mg1.29Fe'''0.02Ti0.00Al0.12Si1.93O6	53.4558	0.0299594	2.93876	0.791288	0	11.4263	0	24.0352	7.23506	0.0877317	0	0
2000	1168	0.182841	0.437213	-2278.39	0.056403	0.22475	cpx	Na0.01Ca0.28Fe''0.35Mg1.29Fe'''0.02Ti0.00Al0.12Si1.93O6	53.4385	0.0303377	2.93556	0.794293	0	11.4921	0	23.9857	7.23541	0.0880693	0	0
2000	1167	0.178704	0.427115	-2225.69	0.055111	0.21958	cpx	Na0.01Ca0.28Fe''0.35Mg1.29Fe'''0.02Ti0.00Al0.12Si1.93O6	53.4213	0.0307161	2.93239	0.797292	0	11.5581	0	23.9364	7.23552	0.0884041	0	0
2000	1166	0.174705	0.417356	-2174.76	0.053861	0.214583	cpx	Na0.01Ca0.28Fe''0.35Mg1.29Fe'''0.02Ti0.00Al0.12Si1.93O6	53.404	0.0310947	2.92922	0.800288	0	11.6241	0	23.8871	7.23541	0.0887363	0	0
2000	1165	0.170838	0.407921	-2125.51	0.052653	0.209752	cpx	Na0.01Ca0.28Fe''0.35Mg1.28Fe'''0.02Ti0.00Al0.12Si1.93O6	53.3867	0.0314735	2.92606	0.803279	0	11.6904	0	23.838	7.23507	0.0890656	0	0
2000	1164	0.167096	0.398796	-2077.89	0.051484	0.205079	cpx	Na0.01Ca0.28Fe''0.36Mg1.28Fe'''0.02Ti0.00Al0.12Si1.93O6	53.3695	0.0318525	2.92292	0.806267	0	11.7567	0	23.7889	7.2345	0.0893923	0	0
2000	1163	0.163475	0.389967	-2031.8	0.050354	0.200558	cpx	Na0.01Ca0.28Fe''0.36Mg1.28Fe'''0.02Ti0.00Al0.12Si1.93O6	53.3522	0.0322315	2.91979	0.809251	0	11.8232	0	23.74	7.23371	0.0897164	0	0
2000	1162	0.15997	0.381422	-1987.2	0.049259	0.196182	cpx	Na0.01Ca0.28Fe''0.36Mg1.28Fe'''0.02Ti0.00Al0.12Si1.93O6	53.3349	0.0326106	2.91667	0.812233	0	11.8898	0	23.6911	7.23269	0.0900377	0	0
2000	1161	0.156575	0.373148	-1944.01	0.048199	0.191945	cpx	Na0.01Ca0.28Fe''0.36Mg1.28Fe'''0.02Ti0.00Al0.12Si1.93O6	53.3176	0.0329899	2.91356	0.815211	0	11.9566	0	23.6423	7.23146	0.0903564	0	0
2000	1160	0.153286	0.365134	-1902.17	0.047172	0.18784	cpx	Na0.01Ca0.28Fe''0.36Mg1.27Fe'''0.02Ti0.00Al0.12Si1.93O6	53.3003	0.0333691	2.91046	0.818188	0	12.0235	0	23.5935	7.23001	0.0906725	0	0
2000	1159	0.150098	0.357368	-1861.64	0.046178	0.183863	cpx	Na0.01Ca0.28Fe''0.37Mg1.27Fe'''0.02Ti0.00Al0.12Si1.93O6	53.283	0.0337485	2.90738	0.821162	0	12.0905	0	23.5449	7.22833	0.090986	0	0
2000	1158	0.147008	0.349842	-1822.35	0.045213	0.180008	cpx	Na0.01Ca0.28Fe''0.37Mg1.27Fe'''0.02Ti0.00Al0.12Si1.93O6	53.2656	0.0341278	2.9043	0.824134	0	12.1578	0	23.4963	7.22645	0.0912968	0	0
2000	1157	0.144011	0.342544	-1784.25	0.044278	0.17627	cpx	Na0.01Ca0.28Fe''0.37Mg1.27Fe'''0.02Ti0.00Al0.12Si1.93O6	53.2483	0.0345072	2.90124	0.827105	0	12.2252	0	23.4477	7.22435	0.0916051	0	0
2000	1156	0.141103	0.335466	-1747.3	0.043371	0.172644	cpx	Na0.01Ca0.28Fe''0.37Mg1.26Fe'''0.02Ti0.00Al0.12Si1.93O6	53.2309	0.0348866	2.89819	0.830075	0	12.2927	0	23.3992	7.22204	0.0919109	0	0
2000	1155	0.138282	0.328599	-1711.45	0.042491	0.169127	cpx	Na0.01Ca0.28Fe''0.37Mg1.26Fe'''0.02Ti0.00Al0.12Si1.93O6	53.2136	0.0352659	2.89514	0.833044	0	12.3605	0	23.3508	7.21951	0.092214	0	0
2000	1154	0.135542	0.321935	-1676.66	0.041636	0.165713	cpx	Na0.01Ca0.28Fe''0.38Mg1.26Fe'''0.02Ti0.00Al0.12Si1.93O6	53.1962	0.0356452	2.89211	0.836013	0	12.4284	0	23.3024	7.21678	0.0925147	0	0
2000	1153	0.132883	0.315465	-1642.88	0.040807	0.162398	cpx	Na0.01Ca0.28Fe''0.38Mg1.26Fe'''0.02Ti0.00Al0.12Si1.93O6	53.1787	0.0360244	2.88909	0.838982	0	12.4964	0	23.2541	7.21385	0.0928128	0	0
2000	1152	0.130299	0.309182	-1610.07	0.040001	0.159179	cpx	Na0.01Ca0.28Fe''0.38Mg1.26Fe'''0.02Ti0.00Al0.12Si1.93O6	53.1613	0.0364036	2.88608	0.84195	0	12.5647	0	23.2057	7.21071	0.0931083	0	0
2000	1151	0.127789	0.303079	-1578.2	0.039218	0.156052	cpx	Na0.01Ca0.28Fe''0.38Mg1.25Fe'''0.02Ti0.00Al0.12Si1.93O6	53.1438	0.0367827	2.88308	0.844919	0	12.6332	0	23.1575	7.20736	0.0934014	0	0
2000	1150	0.12535	0.297149	-1547.24	0.038458	0.153014	cpx	Na0.01Ca0.28Fe''0.39Mg1.25Fe'''0.02Ti0.00Al0.12Si1.93O6	53.1263	0.0371616	2.88009	0.847889	0	12.7018	0	23.1092	7.20382	0.093692	0	0
2000	1149	0.122978	0.291386	-1517.14	0.037719	0.150061	cpx	Na0.01Ca0.28Fe''0.39Mg1.25Fe'''0.02Ti0.00Al0.12Si1.93O6	53.1088	0.0375404	2.87711	0.85086	0	12.7707	0	23.061	7.20007	0.0939801	0	0
2000	1148	0.120672	0.285783	-1487.88	0.037	0.147189	cpx	Na0.01Ca0.28Fe''0.39Mg1.25Fe'''0.02Ti0.00Al0.12Si1.93O6	53.0913	0.0379191	2.87414	0.853832	0	12.8397	0	23.0127	7.19613	0.0942657	0	0
2000	1147	0.118428	0.280334	-1459.43	0.036301	0.144397	cpx	Na0.01Ca0.28Fe''0.39Mg1.24Fe'''0.02Ti0.00Al0.12Si1.93O6	53.0737	0.0382977	2.87118	0.856806	0	12.909	0	22.9645	7.192	0.0945489	0	0
2000	1146	0.116246	0.275034	-1431.75	0.035621	0.141681	cpx	Na0.01Ca0.28Fe''0.39Mg1.24Fe'''0.02Ti0.00Al0.12Si1.93O6	53.0561	0.038676	2.86822	0.859782	0	12.9784	0	22.9163	7.18766	0.0948296	0	0
2000	1145	0.114122	0.269877	-1404.82	0.034959	0.139038	cpx	Na0.01Ca0.28Fe''0.40Mg1.24Fe'''0.02Ti0.00Al0.12Si1.93O6	53.0385	0.0390542	2.86528	0.86276	0	13.0481	0	22.8681	7.18314	0.0951079	0	0
2000	1144	0.112054	0.264859	-1378.6	0.034315	0.136466	cpx	Na0.01Ca0.28Fe''0.40Mg1.24Fe'''0.02Ti0.00Al0.12Si1.93O6	53.0208	0.0394321	2.86235	0.865741	0	13.1179	0	22.8199	7.17842	0.0953837	0	0
2000	1143	0.110041	0.259973	-1353.09	0.033688	0.133962	cpx	Na0.01Ca0.28Fe''0.40Mg1.24Fe'''0.02Ti0.00Al0.12Si1.93O6	53.0031	0.0398099	2.85943	0.868725	0	13.188	0	22.7717	7.17352	0.0956571	0	0
2000	1142	0.10808	0.255216	-1328.24	0.033077	0.131523	cpx	Na0.01Ca0.28Fe''0.40Mg1.23Fe'''0.02Ti0.00Al0.12Si1.93O6	52.9853	0.0401874	2.85652	0.871711	0	13.2584	0	22.7235	7.16843	0.0959281	0	0
2000	1141	0.10617	0.250584	-1304.04	0.032483	0.129148	cpx	Na0.01Ca0.28Fe''0.41Mg1.23Fe'''0.02Ti0.00Al0.12Si1.93O6	52.9675	0.0405646	2.85362	0.874702	0	13.3289	0	22.6753	7.16315	0.0961967	0	0
2000	1140	0.104309	0.246071	-1280.46	0.031903	0.126835	cpx	Na0.01Ca0.28Fe''0.41Mg1.23Fe'''0.02Ti0.00Al0.12Si1.93O6	52.9497	0.0409416	2.85073	0.877696	0	13.3997	0	22.6271	7.15769	0.0964629	0	0
2000	1139	0.102495	0.241674	-1257.49	0.031339	0.12458	cpx	Na0.01Ca0.28Fe''0.41Mg1.23Fe'''0.02Ti0.00Al0.12Si1.93O6	52.9319	0.0413183	2.84785	0.880694	0	13.4707	0	22.5788	7.15204	0.0967267	0	0
2000	1138	0.100727	0.237388	-1235.1	0.030788	0.122383	cpx	Na0.01Ca0.28Fe''0.41Mg1.22Fe'''0.02Ti0.00Al0.12Si1.93O6	52.914	0.0416946	2.84498	0.883697	0	13.5419	0	22.5305	7.14621	0.0969881	0	0
2000	1137	0.099003	0.233211	-1213.27	0.030252	0.120241	cpx	Na0.01Ca0.28Fe''0.42Mg1.22Fe'''0.02Ti0.00Al0.12Si1.93O6	52.896	0.0420707	2.84211	0.886704	0	13.6134	0	22.4822	7.14021	0.0972471	0	0
2000	1136	0.097322	0.229138	-1191.99	0.029729	0.118153	cpx	Na0.01Ca0.28Fe''0.42Mg1.22Fe'''0.02Ti0.00Al0.12Si1.93O6	52.878	0.0424465	2.83926	0.889716	0	13.6852	0	22.4339	7.13403	0.0975038	0	0
2000	1135	0.095682	0.225166	-1171.24	0.029218	0.116116	cpx	Na0.01Ca0.28Fe''0.42Mg1.22Fe'''0.02Ti0.00Al0.12Si1.93O6	52.86	0.0428219	2.83642	0.892733	0	13.7571	0	22.3855	7.12767	0.097758	0	0
2000	1134	0.094082	0.221292	-1150.99	0.028721	0.114129	cpx	Na0.01Ca0.28Fe''0.42Mg1.22Fe'''0.02Ti0.00Al0.12Si1.93O6	52.8419	0.0431969	2.83358	0.895757	0	13.8294	0	22.3371	7.12113	0.09801	0	0
2000	1133	0.092521	0.217512	-1131.24	0.028235	0.11219	cpx	Na0.01Ca0.28Fe''0.42Mg1.21Fe'''0.02Ti0.00Al0.12Si1.93O6	52.8237	0.0435716	2.83076	0.898786	0	13.9018	0	22.2886	7.11443	0.0982595	0	0
2000	1132	0.090997	0.213824	-1111.96	0.027761	0.110299	cpx	Na0.01Ca0.28Fe''0.43Mg1.21Fe'''0.02Ti0.00Al0.12Si1.93O6	52.8056	0.0439459	2.82794	0.901821	0	13.9746	0	22.2401	7.10755	0.0985068	0	0
2000	1131	0.089509	0.210224	-1093.14	0.027298	0.108452	cpx	Na0.01Ca0.28Fe''0.43Mg1.21Fe'''0.02Ti0.00Al0.12Si1.93O6	52.7873	0.0443198	2.82514	0.904863	0	14.0476	0	22.1915	7.1005	0.0987516	0	0
2000	1130	0.088056	0.20671	-1074.78	0.026846	0.10665	cpx	Na0.01Ca0.28Fe''0.43Mg1.21Fe'''0.02Ti0.00Al0.12Si1.93O6	52.769	0.0446933	2.82234	0.907911	0	14.1209	0	22.1429	7.09328	0.0989942	0	0
2000	1129	0.086638	0.203279	-1056.84	0.026405	0.104889	cpx	Na0.01Ca0.28Fe''0.43Mg1.20Fe'''0.03Ti0.00Al0.12Si1.93O6	52.7507	0.0450663	2.81956	0.910967	0	14.1944	0	22.0942	7.0859	0.0992344	0	0
2000	1128	0.085252	0.199929	-1039.33	0.025975	0.10317	cpx	Na0.01Ca0.28Fe''0.44Mg1.20Fe'''0.03Ti0.00Al0.12Si1.93O6	52.7323	0.045439	2.81678	0.91403	0	14.2682	0	22.0454	7.07835	0.0994723	0	0
2000	1127	0.083898	0.196656	-1022.22	0.025554	0.101491	cpx	Na0.01Ca0.28Fe''0.44Mg1.20Fe'''0.03Ti0.00Al0.12Si1.93O6	52.7138	0.0458111	2.81402	0.917101	0	14.3423	0	21.9966	7.07064	0.0997078	0	0
2000	1126	0.082575	0.193459	-1005.5	0.025143	0.099851	cpx	Na0.01Ca0.28Fe''0.44Mg1.20Fe'''0.03Ti0.00Al0.12Si1.93O6	52.6953	0.0461829	2.81126	0.92018	0	14.4167	0	21.9477	7.06277	0.0999411	0	0
2000	1125	0.081283	0.190336	-989.168	0.024741	0.098248	cpx	Na0.01Ca0.28Fe''0.44Mg1.20Fe'''0.03Ti0.00Al0.12Si1.93O6	52.6767	0.0465541	2.80851	0.923267	0	14.4913	0	21.8987	7.05473	0.100172	0	0
2000	1124	0.080019	0.187283	-973.206	0.024348	0.096682	cpx	Na0.01Ca0.28Fe''0.45Mg1.19Fe'''0.03Ti0.00Al0.12Si1.93O6	52.6581	0.0469248	2.80577	0.926363	0	14.5662	0	21.8497	7.04654	0.100401	0	0
2000	1123	0.078784	0.1843	-957.604	0.023964	0.09515	cpx	Na0.01Ca0.28Fe''0.45Mg1.19Fe'''0.03Ti0.00Al0.12Si1.93O6	52.6394	0.0472951	2.80304	0.929468	0	14.6415	0	21.8005	7.03819	0.100627	0	0
2000	1122	0.077576	0.181384	-942.351	0.023589	0.093654	cpx	Na0.01Ca0.28Fe''0.45Mg1.19Fe'''0.03Ti0.00Al0.12Si1.93O6	52.6206	0.0476648	2.80033	0.932582	0	14.717	0	21.7513	7.02968	0.100851	0	0
2000	1121	0.076394	0.178532	-927.436	0.023222	0.09219	cpx	Na0.01Ca0.28Fe''0.45Mg1.19Fe'''0.03Ti0.00Al0.12Si1.93O6	52.6018	0.048034	2.79762	0.935706	0	14.7928	0	21.702	7.02102	0.101073	0	0
2000	1120	0.075239	0.175744	-912.851	0.022863	0.090759	cpx	Na0.01Ca0.28Fe''0.46Mg1.18Fe'''0.03Ti0.00Al0.12Si1.93O6	52.5829	0.0484027	2.79492	0.93884	0	14.8689	0	21.6526	7.0122	0.101292	0	0
2000	1119	0.074109	0.173017	-898.585	0.022512	0.089359	cpx	Na0.01Ca0.28Fe''0.46Mg1.18Fe'''0.03Ti0.00Al0.12Si1.93O6	52.5639	0.0487708	2.79223	0.941984	0	14.9453	0	21.603	7.00324	0.101509	0	0
2000	1118	0.073003	0.17035	-884.63	0.022169	0.087989	cpx	Na0.01Ca0.28Fe''0.46Mg1.18Fe'''0.03Ti0.00Al0.12Si1.93O6	52.5449	0.0491384	2.78955	0.945139	0	15.022	0	21.5534	6.99412	0.101724	0	0
2000	1117	0.071921	0.16774	-870.976	0.021833	0.086649	cpx	Na0.01Ca0.27Fe''0.46Mg1.18Fe'''0.03Ti0.00Al0.12Si1.93O6	52.5258	0.0495054	2.78688	0.948305	0	15.0991	0	21.5037	6.98486	0.101937	0	0
2000	1116	0.070862	0.165187	-857.615	0.021504	0.085338	cpx	Na0.01Ca0.27Fe''0.47Mg1.17Fe'''0.03Ti0.00Al0.12Si1.93O6	52.5066	0.0498718	2.78422	0.951482	0	15.1764	0	21.4538	6.97544	0.102147	0	0
2000	1115	0.069825	0.162688	-844.54	0.021182	0.084055	cpx	Na0.01Ca0.27Fe''0.47Mg1.17Fe'''0.03Ti0.00Al0.12Si1.93O6	52.4874	0.0502376	2.78156	0.95467	0	15.2541	0	21.4039	6.96588	0.102355	0	0
2000	1114	0.06881	0.160242	-831.741	0.020868	0.082799	cpx	Na0.01Ca0.27Fe''0.47Mg1.17Fe'''0.03Ti0.00Al0.12Si1.93O6	52.468	0.0506028	2.77892	0.957871	0	15.3321	0	21.3538	6.95618	0.102561	0	0
2000	1113	0.067817	0.157849	-819.212	0.020559	0.081569	cpx	Na0.01Ca0.27Fe''0.47Mg1.17Fe'''0.03Ti0.00Al0.12Si1.93O6	52.4486	0.0509674	2.77629	0.961084	0	15.4104	0	21.3036	6.94633	0.102764	0	0
2000	1112	0.066844	0.155505	-806.944	0.020257	0.080366	cpx	Na0.01Ca0.27Fe''0.48Mg1.17Fe'''0.03Ti0.00Al0.12Si1.93O6	52.4292	0.0513314	2.77367	0.964309	0	15.489	0	21.2532	6.93635	0.102965	0	0
2000	1111	0.065891	0.15321	-794.932	0.019962	0.079187	cpx	Na0.01Ca0.27Fe''0.48Mg1.16Fe'''0.03Ti0.00Al0.12Si1.93O6	52.4096	0.0516947	2.77106	0.967547	0	15.568	0	21.2028	6.92622	0.103164	0	0
2000	1110	0.064958	0.150963	-783.168	0.019672	0.078032	cpx	Na0.01Ca0.27Fe''0.48Mg1.16Fe'''0.03Ti0.00Al0.12Si1.93O6	52.39	0.0520574	2.76845	0.970799	0	15.6473	0	21.1522	6.91595	0.103361	0	0
2000	1109	0.064044	0.148762	-771.645	0.019388	0.076902	cpx	Na0.01Ca0.27Fe''0.48Mg1.16Fe'''0.03Ti0.00Al0.12Si1.93O6	52.3703	0.0524195	2.76586	0.974064	0	15.7269	0	21.1014	6.90555	0.103555	0	0
2000	1108	0.063148	0.146607	-760.357	0.019111	0.075794	cpx	Na0.01Ca0.27Fe''0.49Mg1.16Fe'''0.03Ti0.00Al0.12Si1.93O6	52.3505	0.0527809	2.76328	0.977344	0	15.8069	0	21.0505	6.89501	0.103748	0	0
2000	1107	0.06227	0.144495	-749.298	0.018838	0.074709	cpx	Na0.01Ca0.27Fe''0.49Mg1.15Fe'''0.03Ti0.00Al0.12Si1.93O6	52.3306	0.0531416	2.7607	0.980637	0	15.8872	0	20.9995	6.88433	0.103937	0	0
2000	1106	0.06141	0.142426	-738.462	0.018572	0.073646	cpx	Na0.01Ca0.27Fe''0.49Mg1.15Fe'''0.03Ti0.00Al0.12Si1.93O6	52.3106	0.0535016	2.75814	0.983946	0	15.9678	0	20.9483	6.87352	0.104125	0	0
2000	1105	0.060567	0.140399	-727.843	0.01831	0.072604	cpx	Na0.01Ca0.27Fe''0.50Mg1.15Fe'''0.03Ti0.00Al0.12Si1.93O6	52.2906	0.053861	2.75559	0.987269	0	16.0488	0	20.897	6.86258	0.10431	0	0
2000	1104	0.059741	0.138412	-717.436	0.018054	0.071582	cpx	Na0.01Ca0.27Fe''0.50Mg1.15Fe'''0.03Ti0.00Al0.12Si1.93O6	52.2704	0.0542197	2.75304	0.990608	0	16.1302	0	20.8455	6.85151	0.104494	0	0
2000	1103	0.058931	0.136465	-707.235	0.017803	0.070581	cpx	Na0.01Ca0.27Fe''0.50Mg1.14Fe'''0.03Ti0.00Al0.12Si1.93O6	52.2502	0.0545776	2.75051	0.993963	0	16.2119	0	20.7938	6.84031	0.104674	0	0
2000	1102	0.058137	0.134556	-697.235	0.017557	0.0696	cpx	Na0.01Ca0.27Fe''0.50Mg1.14Fe'''0.03Ti0.00Al0.12Si1.93O6	52.2299	0.0549348	2.74798	0.997333	0	16.294	0	20.742	6.82898	0.104853	0	0
2000	1101	0.057358	0.132685	-687.431	0.017315	0.068638	cpx	Na0.01Ca0.27Fe''0.51Mg1.14Fe'''0.03Ti0.00Al0.12Si1.93O6	52.2095	0.0552914	2.74547	1.00072	0	16.3765	0	20.69	6.81752	0.105029	0	0
2000	1100	0.056594	0.130851	-677.817	0.017079	0.067695	cpx	Na0.01Ca0.27Fe''0.51Mg1.14Fe'''0.03Ti0.00Al0.12Si1.93O6	52.189	0.0556472	2.74296	1.00412	0	16.4593	0	20.6379	6.80594	0.105204	0	0
2000	1099	0.055845	0.129052	-668.39	0.016847	0.06677	cpx	Na0.01Ca0.27Fe''0.51Mg1.13Fe'''0.03Ti0.00Al0.12Si1.93O6	52.1684	0.0560022	2.74047	1.00755	0	16.5424	0	20.5855	6.79424	0.105375	0	0
2000	1098	0.055111	0.127289	-659.145	0.016619	0.065863	cpx	Na0.01Ca0.27Fe''0.51Mg1.13Fe'''0.03Ti0.00Al0.12Si1.93O6	52.1477	0.0563565	2.73799	1.01099	0	16.626	0	20.533	6.78241	0.105545	0	0
2000	1097	0.05439	0.125559	-650.077	0.016396	0.064973	cpx	Na0.01Ca0.27Fe''0.52Mg1.13Fe'''0.03Ti0.00Al0.12Si1.93O6	52.1269	0.0567101	2.73551	1.01444	0	16.7099	0	20.4803	6.77046	0.105712	0	0
2000	1096	0.053684	0.123862	-641.182	0.016177	0.064101	cpx	Na0.01Ca0.27Fe''0.52Mg1.13Fe'''0.03Ti0.00Al0.12Si1.93O6	52.106	0.0570629	2.73305	1.01792	0	16.7943	0	20.4274	6.75839	0.105878	0	0
2000	1095	0.05299	0.122198	-632.455	0.015962	0.063245	cpx	Na0.01Ca0.27Fe''0.52Mg1.12Fe'''0.03Ti0.00Al0.12Si1.93O6	52.085	0.057415	2.73059	1.02141	0	16.8789	0	20.3744	6.7462	0.10604	0	0
2000	1094	0.05231	0.120565	-623.893	0.015751	0.062405	cpx	Na0.01Ca0.27Fe''0.53Mg1.12Fe'''0.03Ti0.00Al0.12Si1.93O6	52.0639	0.0577662	2.72815	1.02493	0	16.964	0	20.3211	6.7339	0.106201	0	0
2000	1093	0.051642	0.118963	-615.492	0.015544	0.06158	cpx	Na0.01Ca0.27Fe''0.53Mg1.12Fe'''0.03Ti0.00Al0.12Si1.93O6	52.0427	0.0581167	2.72571	1.02846	0	17.0495	0	20.2676	6.72147	0.106359	0	0
2000	1092	0.050986	0.117392	-607.248	0.015341	0.060772	cpx	Na0.01Ca0.27Fe''0.53Mg1.12Fe'''0.03Ti0.00Al0.12Si1.93O6	52.0214	0.0584665	2.72329	1.03201	0	17.1354	0	20.214	6.70894	0.106516	0	0
2000	1091	0.050343	0.11585	-599.157	0.015142	0.059978	cpx	Na0.01Ca0.27Fe''0.53Mg1.11Fe'''0.03Ti0.00Al0.12Si1.93O6	52.0001	0.0588154	2.72087	1.03559	0	17.2216	0	20.1601	6.69628	0.10667	0	0
2000	1090	0.049712	0.114336	-591.216	0.014947	0.059199	cpx	Na0.01Ca0.27Fe''0.54Mg1.11Fe'''0.03Ti0.00Al0.12Si1.93O6	51.9785	0.0591636	2.71847	1.03918	0	17.3083	0	20.106	6.68352	0.106821	0	0
2000	1089	0.049092	0.112851	-583.421	0.014755	0.058435	cpx	Na0.01Ca0.27Fe''0.54Mg1.11Fe'''0.03Ti0.00Al0.12Si1.93O6	51.9569	0.0595109	2.71607	1.0428	0	17.3954	0	20.0517	6.67064	0.106971	0	0
2000	1088	0.048484	0.111393	-575.769	0.014566	0.057684	cpx	Na0.01Ca0.26Fe''0.54Mg1.11Fe'''0.03Ti0.00Al0.12Si1.93O6	51.9352	0.0598575	2.71369	1.04643	0	17.4829	0	19.9972	6.65766	0.107118	0	0
2000	1087	0.047886	0.109961	-568.257	0.014381	0.056947	cpx	Na0.01Ca0.26Fe''0.55Mg1.10Fe'''0.03Ti0.00Al0.12Si1.93O6	51.9134	0.0602032	2.71132	1.05009	0	17.5707	0	19.9424	6.64456	0.107263	0	0
2000	1086	0.0473	0.108556	-560.881	0.0142	0.056224	cpx	Na0.01Ca0.26Fe''0.55Mg1.10Fe'''0.03Ti0.00Al0.12Si1.93O6	51.8914	0.0605481	2.70895	1.05378	0	17.6591	0	19.8875	6.63136	0.107406	0	0
2000	1085	0.046724	0.107177	-553.638	0.014021	0.055513	cpx	Na0.01Ca0.26Fe''0.55Mg1.10Fe'''0.03Ti0.00Al0.12Si1.93O6	51.8694	0.0608923	2.7066	1.05748	0	17.7478	0	19.8323	6.61805	0.107546	0	0
2000	1084	0.046158	0.105822	-546.526	0.013846	0.054816	cpx	Na0.01Ca0.26Fe''0.55Mg1.10Fe'''0.03Ti0.00Al0.12Si1.93O6	51.8472	0.0612356	2.70425	1.06121	0	17.8369	0	19.7768	6.60464	0.107684	0	0
2000	1083	0.045602	0.104492	-539.54	0.013674	0.054131	cpx	Na0.01Ca0.26Fe''0.56Mg1.09Fe'''0.03Ti0.00Al0.12Si1.93O6	51.8249	0.0615781	2.70192	1.06496	0	17.9265	0	19.7212	6.59112	0.10782	0	0
2000	1082	0.045057	0.103186	-532.68	0.013505	0.053458	cpx	Na0.01Ca0.26Fe''0.56Mg1.09Fe'''0.03Ti0.00Al0.12Si1.93O6	51.8025	0.0619197	2.69959	1.06874	0	18.0165	0	19.6653	6.5775	0.107954	0	0
2000	1081	0.044521	0.101903	-525.941	0.013339	0.052797	cpx	Na0.01Ca0.26Fe''0.56Mg1.09Fe'''0.03Ti0.00Al0.12Si1.93O6	51.78	0.0622606	2.69728	1.07254	0	18.1069	0	19.6091	6.56378	0.108085	0	0
2000	1080	0.043994	0.100643	-519.322	0.013176	0.052148	cpx	Na0.01Ca0.26Fe''0.57Mg1.09Fe'''0.03Ti0.00Al0.12Si1.93O6	51.7574	0.0626006	2.69497	1.07637	0	18.1978	0	19.5528	6.54996	0.108215	0	0
2000	1079	0.043477	0.099406	-512.819	0.013016	0.051511	cpx	Na0.01Ca0.26Fe''0.57Mg1.08Fe'''0.03Ti0.00Al0.12Si1.93O6	51.7346	0.0629398	2.69268	1.08022	0	18.2891	0	19.4961	6.53604	0.108342	0	0
2000	1078	0.042968	0.09819	-506.43	0.012859	0.050884	cpx	Na0.01Ca0.26Fe''0.57Mg1.08Fe'''0.03Ti0.00Al0.12Si1.93O6	51.7117	0.0632781	2.69039	1.0841	0	18.3808	0	19.4392	6.52202	0.108466	0	0
2000	1077	0.042469	0.096996	-500.153	0.012705	0.050269	cpx	Na0.01Ca0.26Fe''0.58Mg1.08Fe'''0.03Ti0.00Al0.12Si1.93O6	51.6887	0.0636156	2.68812	1.088	0	18.473	0	19.3821	6.5079	0.108589	0	0
2000	1076	0.041978	0.095823	-493.985	0.012553	0.049664	cpx	Na0.01Ca0.26Fe''0.58Mg1.07Fe'''0.03Ti0.00Al0.12Si1.93O6	51.6656	0.0639523	2.68585	1.09193	0	18.5656	0	19.3247	6.49369	0.108709	0	0
2000	1075	0.041496	0.09467	-487.924	0.012404	0.04907	cpx	Na0.01Ca0.26Fe''0.58Mg1.07Fe'''0.03Ti0.00Al0.12Si1.93O6	51.6423	0.0642881	2.6836	1.09589	0	18.6587	0	19.267	6.47938	0.108827	0	0
2000	1074	0.041022	0.093537	-481.968	0.012257	0.048486	cpx	Na0.01Ca0.26Fe''0.59Mg1.07Fe'''0.03Ti0.00Al0.12Si1.93O6	51.6189	0.0646231	2.68135	1.09988	0	18.7522	0	19.209	6.46498	0.108943	0	0
2000	1073	0.040548	0.092404	-476.009	0.01211	0.047902	cpx	Na0.01Ca0.26Fe''0.59Mg1.07Fe'''0.03Ti0.00Al0.12Si1.93O6	51.5955	0.0649565	2.6791	1.10388	0	18.8461	0	19.1509	6.45049	0.109056	0	0
2000	1072	0.040069	0.091264	-470.016	0.011962	0.047314	cpx	Na0.01Ca0.26Fe''0.59Mg1.06Fe'''0.03Ti0.00Al0.12Si1.93O6	51.572	0.0652873	2.67682	1.10788	0	18.9403	0	19.0927	6.4359	0.109165	0	0
2000	1071	0.039615	0.09018	-464.317	0.011822	0.046755	cpx	Na0.01Ca0.26Fe''0.60Mg1.06Fe'''0.03Ti0.00Al0.12Si1.93O6	51.5483	0.065617	2.67455	1.1119	0	19.0349	0	19.0342	6.42123	0.109272	0	0
2000	1070	0.039169	0.089115	-458.715	0.011684	0.046206	cpx	Na0.01Ca0.26Fe''0.60Mg1.06Fe'''0.03Ti0.00Al0.12Si1.93O6	51.5246	0.0659456	2.67229	1.11596	0	19.13	0	18.9754	6.40646	0.109377	0	0
2000	1069	0.038732	0.08807	-453.216	0.011549	0.045667	cpx	Na0.01Ca0.26Fe''0.60Mg1.06Fe'''0.03Ti0.00Al0.12Si1.93O6	51.5007	0.0662732	2.67004	1.12004	0	19.2256	0	18.9163	6.39161	0.10948	0	0
2000	1068	0.038301	0.087042	-447.809	0.011416	0.045137	cpx	Na0.01Ca0.26Fe''0.61Mg1.05Fe'''0.03Ti0.00Al0.12Si1.93O6	51.4766	0.0665999	2.66779	1.12415	0	19.3216	0	18.857	6.37668	0.10958	0	0
2000	1067	0.037878	0.086032	-442.492	0.011285	0.044616	cpx	Na0.01Ca0.26Fe''0.61Mg1.05Fe'''0.03Ti0.00Al0.12Si1.93O6	51.4525	0.0669255	2.66556	1.12829	0	19.4181	0	18.7974	6.36166	0.109678	0	0
2000	1066	0.037462	0.085039	-437.264	0.011156	0.044103	cpx	Na0.01Ca0.25Fe''0.61Mg1.05Fe'''0.03Ti0.00Al0.12Si1.93O6	51.4282	0.0672502	2.66333	1.13246	0	19.515	0	18.7374	6.34656	0.109774	0	0
2000	1065	0.037052	0.084063	-432.122	0.01103	0.043599	cpx	Na0.01Ca0.25Fe''0.61Mg1.04Fe'''0.03Ti0.00Al0.12Si1.93O6	51.4037	0.0675739	2.66111	1.13667	0	19.6124	0	18.6772	6.33138	0.109868	0	0
2000	1064	0.03665	0.083102	-427.066	0.010905	0.043104	cpx	Na0.01Ca0.25Fe''0.62Mg1.04Fe'''0.03Ti0.00Al0.12Si1.93O6	51.3792	0.0678966	2.65891	1.14091	0	19.7104	0	18.6167	6.31612	0.109959	0	0
2000	1063	0.036254	0.082158	-422.092	0.010783	0.042617	cpx	Na0.01Ca0.25Fe''0.62Mg1.04Fe'''0.03Ti0.00Al0.12Si1.93O6	51.3544	0.0682183	2.6567	1.14517	0	19.8087	0	18.5559	6.30078	0.110048	0	0
2000	1062	0.035864	0.08123	-417.2	0.010662	0.042137	cpx	Na0.01Ca0.25Fe''0.63Mg1.04Fe'''0.03Ti0.00Al0.12Si1.93O6	51.3296	0.068539	2.65451	1.14948	0	19.9076	0	18.4948	6.28536	0.110135	0	0
2000	1061	0.035481	0.080316	-412.388	0.010544	0.041666	cpx	Na0.01Ca0.25Fe''0.63Mg1.03Fe'''0.03Ti0.00Al0.12Si1.93O6	51.3046	0.0688586	2.65233	1.15381	0	20.007	0	18.4333	6.26987	0.110219	0	0
2000	1060	0.035105	0.079418	-407.654	0.010428	0.041202	cpx	Na0.01Ca0.25Fe''0.63Mg1.03Fe'''0.03Ti0.00Al0.12Si1.93O6	51.2795	0.0691773	2.65015	1.15818	0	20.1068	0	18.3716	6.2543	0.110301	0	0
2000	1059	0.034734	0.078534	-402.997	0.010313	0.040746	cpx	Na0.01Ca0.25Fe''0.64Mg1.03Fe'''0.03Ti0.00Al0.12Si1.93O6	51.2542	0.0694949	2.64798	1.16258	0	20.2072	0	18.3095	6.23866	0.110381	0	0
2000	1058	0.034369	0.077665	-398.414	0.0102	0.040297	cpx	Na0.01Ca0.25Fe''0.64Mg1.02Fe'''0.03Ti0.00Al0.12Si1.93O6	51.2287	0.0698114	2.64582	1.16702	0	20.308	0	18.2472	6.22294	0.110459	0	0
2000	1057	0.03401	0.07681	-393.905	0.010089	0.039855	cpx	Na0.01Ca0.25Fe''0.64Mg1.02Fe'''0.03Ti0.00Al0.12Si1.93O6	51.2032	0.070127	2.64367	1.17149	0	20.4094	0	18.1845	6.20716	0.110534	0	0
2000	1056	0.033657	0.075969	-389.469	0.00998	0.039421	cpx	Na0.01Ca0.25Fe''0.65Mg1.02Fe'''0.03Ti0.00Al0.12Si1.93O6	51.1775	0.0704415	2.64152	1.176	0	20.5112	0	18.1214	6.1913	0.110607	0	0
2000	1055	0.03331	0.075141	-385.103	0.009873	0.038993	cpx	Na0.01Ca0.25Fe''0.65Mg1.01Fe'''0.03Ti0.00Al0.12Si1.93O6	51.1516	0.0707549	2.63938	1.18055	0	20.6136	0	18.0581	6.17537	0.110678	0	0
2000	1054	0.032968	0.074327	-380.806	0.009767	0.038573	cpx	Na0.01Ca0.25Fe''0.65Mg1.01Fe'''0.03Ti0.00Al0.12Si1.93O6	51.1256	0.0710673	2.63725	1.18513	0	20.7165	0	17.9944	6.15938	0.110746	0	0
2000	1053	0.032632	0.073526	-376.577	0.009663	0.038159	cpx	Na0.01Ca0.25Fe''0.66Mg1.01Fe'''0.03Ti0.00Al0.12Si1.93O6	51.0994	0.0713787	2.63512	1.18975	0	20.8198	0	17.9304	6.14332	0.110813	0	0
2000	1052	0.032301	0.072737	-372.414	0.009561	0.037751	cpx	Na0.01Ca0.25Fe''0.66Mg1.00Fe'''0.03Ti0.00Al0.12Si1.93O6	51.0731	0.0716889	2.633	1.1944	0	20.9237	0	17.866	6.1272	0.110876	0	0
2000	1051	0.031975	0.071961	-368.317	0.00946	0.03735	cpx	Na0.01Ca0.25Fe''0.66Mg1.00Fe'''0.03Ti0.00Al0.12Si1.93O6	51.0466	0.0719981	2.63089	1.1991	0	21.0281	0	17.8013	6.11101	0.110938	0	0
2000	1050	0.031654	0.071197	-364.283	0.009361	0.036955	cpx	Na0.01Ca0.25Fe''0.67Mg1.00Fe'''0.03Ti0.00Al0.12Si1.93O6	51.02	0.0723062	2.62878	1.20384	0	21.133	0	17.7363	6.09476	0.110997	0	0
2000	1049	0.031338	0.070446	-360.312	0.009263	0.036567	cpx	Na0.01Ca0.25Fe''0.67Mg1.00Fe'''0.03Ti0.00Al0.12Si1.93O6	50.9932	0.0726132	2.62668	1.20861	0	21.2385	0	17.6709	6.07845	0.111054	0	0
2000	1048	0.031027	0.069706	-356.403	0.009167	0.036184	cpx	Na0.01Ca0.25Fe''0.67Mg0.99Fe'''0.03Ti0.00Al0.12Si1.93O6	50.9663	0.072919	2.62459	1.21342	0	21.3445	0	17.6052	6.06208	0.111109	0	0
2000	1047	0.030721	0.068977	-352.553	0.009073	0.035807	cpx	Na0.01Ca0.24Fe''0.68Mg0.99Fe'''0.03Ti0.00Al0.12Si1.93O6	50.9392	0.0732238	2.6225	1.21828	0	21.4509	0	17.5391	6.04566	0.111161	0	0
2000	1046	0.03042	0.06826	-348.763	0.008979	0.035437	cpx	Na0.01Ca0.24Fe''0.68Mg0.99Fe'''0.03Ti0.00Al0.12Si1.93O6	50.9119	0.0735274	2.62041	1.22317	0	21.558	0	17.4726	6.02917	0.111211	0	0
2000	1045	0.030123	0.067554	-345.03	0.008888	0.035071	cpx	Na0.01Ca0.24Fe''0.69Mg0.98Fe'''0.03Ti0.00Al0.12Si1.93O6	50.8845	0.0738299	2.61833	1.22811	0	21.6655	0	17.4058	6.01263	0.111258	0	0
2000	1044	0.029831	0.066859	-341.353	0.008797	0.034712	cpx	Na0.01Ca0.24Fe''0.69Mg0.98Fe'''0.04Ti0.00Al0.12Si1.93O6	50.8569	0.0741312	2.61626	1.23309	0	21.7736	0	17.3387	5.99603	0.111304	0	0
2000	1043	0.029543	0.066174	-337.732	0.008708	0.034358	cpx	Na0.01Ca0.24Fe''0.69Mg0.98Fe'''0.04Ti0.00Al0.12Si1.93O6	50.8292	0.0744313	2.61419	1.23811	0	21.8822	0	17.2711	5.97939	0.111347	0	0
2000	1042	0.02926	0.0655	-334.165	0.008621	0.034009	cpx	Na0.01Ca0.24Fe''0.70Mg0.97Fe'''0.04Ti0.00Al0.12Si1.93O6	50.8013	0.0747302	2.61212	1.24318	0	21.9914	0	17.2032	5.96269	0.111387	0	0
2000	1041	0.028981	0.064836	-330.652	0.008535	0.033665	cpx	Na0.01Ca0.24Fe''0.70Mg0.97Fe'''0.04Ti0.00Al0.12Si1.93O6	50.7732	0.0750279	2.61006	1.24829	0	22.1011	0	17.135	5.94594	0.111426	0	0
2000	1040	0.028706	0.064182	-327.19	0.00845	0.033327	cpx	Na0.01Ca0.24Fe''0.70Mg0.97Fe'''0.04Ti0.00Al0.12Si1.93O6	50.745	0.0753244	2.608	1.25344	0	22.2113	0	17.0663	5.92914	0.111461	0	0
2000	1039	0.028435	0.063538	-323.779	0.008366	0.032993	cpx	Na0.01Ca0.24Fe''0.71Mg0.96Fe'''0.04Ti0.00Al0.12Si1.93O6	50.7166	0.0756196	2.60594	1.25864	0	22.322	0	16.9973	5.91229	0.111495	0	0
2000	1038	0.028168	0.062904	-320.418	0.008283	0.032665	cpx	Na0.01Ca0.24Fe''0.71Mg0.96Fe'''0.04Ti0.00Al0.12Si1.93O6	50.6881	0.0759135	2.60388	1.26388	0	22.4334	0	16.9279	5.8954	0.111526	0	0
2000	1037	0.027905	0.062278	-317.106	0.008202	0.032341	cpx	Na0.01Ca0.24Fe''0.72Mg0.96Fe'''0.04Ti0.00Al0.12Si1.93O6	50.6594	0.0762061	2.60183	1.26916	0	22.5452	0	16.8582	5.87846	0.111555	0	0
2000	1036	0.027646	0.061662	-313.842	0.008122	0.032022	cpx	Na0.01Ca0.24Fe''0.72Mg0.95Fe'''0.04Ti0.00Al0.12Si1.93O6	50.6305	0.0764974	2.59978	1.2745	0	22.6576	0	16.788	5.86148	0.111582	0	0
2000	1035	0.027391	0.061055	-310.625	0.008043	0.031708	cpx	Na0.01Ca0.24Fe''0.72Mg0.95Fe'''0.04Ti0.00Al0.12Si1.93O6	50.6015	0.0767873	2.59773	1.27988	0	22.7706	0	16.7175	5.84446	0.111606	0	0
2000	1034	0.027139	0.060457	-307.453	0.007965	0.031398	cpx	Na0.01Ca0.24Fe''0.73Mg0.94Fe'''0.04Ti0.00Al0.12Si1.93O6	50.5723	0.0770758	2.59568	1.28531	0	22.8841	0	16.6466	5.8274	0.111628	0	0
2000	1033	0.026891	0.059868	-304.327	0.007888	0.031093	cpx	Na0.01Ca0.24Fe''0.73Mg0.94Fe'''0.04Ti0.00Al0.12Si1.93O6	50.5429	0.0773629	2.59364	1.29078	0	22.9981	0	16.5753	5.8103	0.111647	0	0
2000	1032	0.026647	0.059286	-301.244	0.007813	0.030792	cpx	Na0.01Ca0.24Fe''0.74Mg0.94Fe'''0.04Ti0.00Al0.12Si1.93O6	50.5133	0.0776485	2.59159	1.2963	0	23.1127	0	16.5036	5.79317	0.111664	0	0
2000	1031	0.026406	0.058713	-298.204	0.007738	0.030495	cpx	Na0.01Ca0.24Fe''0.74Mg0.93Fe'''0.04Ti0.00Al0.12Si1.93O6	50.4836	0.0779326	2.58954	1.30187	0	23.2278	0	16.4315	5.77599	0.111679	0	0
2000	1030	0.026168	0.058148	-295.206	0.007665	0.030202	cpx	Na0.01Ca0.24Fe''0.74Mg0.93Fe'''0.04Ti0.00Al0.12Si1.92O6	50.4537	0.0782151	2.58749	1.30749	0	23.3435	0	16.3591	5.75879	0.111691	0	0
2000	1029	0.025934	0.057591	-292.248	0.007592	0.029913	cpx	Na0.01Ca0.23Fe''0.75Mg0.93Fe'''0.04Ti0.00Al0.12Si1.92O6	50.4237	0.078496	2.58544	1.31316	0	23.4597	0	16.2862	5.74155	0.111701	0	0
2000	1028	0.025702	0.057042	-289.331	0.007521	0.029628	cpx	Na0.01Ca0.23Fe''0.75Mg0.92Fe'''0.04Ti0.00Al0.12Si1.92O6	50.3935	0.0787752	2.58338	1.31887	0	23.5765	0	16.213	5.72429	0.111709	0	0
2000	1027	0.025474	0.0565	-286.453	0.00745	0.029347	cpx	Na0.01Ca0.23Fe''0.76Mg0.92Fe'''0.04Ti0.00Al0.12Si1.92O6	50.3631	0.0790528	2.58133	1.32464	0	23.6939	0	16.1393	5.70699	0.111714	0	0
2000	1026	0.025249	0.055965	-283.613	0.00738	0.02907	cpx	Na0.01Ca0.23Fe''0.76Mg0.92Fe'''0.04Ti0.00Al0.12Si1.92O6	50.3325	0.0793286	2.57927	1.33046	0	23.8117	0	16.0653	5.68967	0.111717	0	0
2000	1025	0.025027	0.055438	-280.811	0.007312	0.028797	cpx	Na0.01Ca0.23Fe''0.77Mg0.91Fe'''0.04Ti0.00Al0.12Si1.92O6	50.3018	0.0796025	2.5772	1.33632	0	23.9302	0	15.9908	5.67232	0.111717	0	0
2000	1024	0.024808	0.054917	-278.044	0.007244	0.028527	cpx	Na0.01Ca0.23Fe''0.77Mg0.91Fe'''0.04Ti0.00Al0.12Si1.92O6	50.2709	0.0798745	2.57514	1.34224	0	24.0492	0	15.916	5.65495	0.111715	0	0
2000	1023	0.024592	0.054404	-275.317	0.007177	0.028261	cpx	Na0.01Ca0.23Fe''0.77Mg0.90Fe'''0.04Ti0.00Al0.12Si1.92O6	50.2399	0.0801446	2.57306	1.34821	0	24.1687	0	15.8408	5.63756	0.111711	0	0
2000	1022	0.024379	0.053899	-272.633	0.007111	0.027999	cpx	Na0.01Ca0.23Fe''0.78Mg0.90Fe'''0.04Ti0.00Al0.12Si1.92O6	50.2087	0.0804126	2.57098	1.35423	0	24.2887	0	15.7651	5.62015	0.111704	0	0
2000	1021	0.02417	0.053401	-269.982	0.007046	0.02774	cpx	Na0.01Ca0.23Fe''0.78Mg0.90Fe'''0.04Ti0.00Al0.12Si1.92O6	50.1773	0.0806784	2.56889	1.3603	0	24.4094	0	15.6891	5.60272	0.111695	0	0
2000	1020	0.023962	0.052908	-267.363	0.006982	0.027485	cpx	Na0.01Ca0.23Fe''0.79Mg0.89Fe'''0.04Ti0.00Al0.12Si1.92O6	50.1457	0.0809421	2.5668	1.36642	0	24.5305	0	15.6127	5.58527	0.111683	0	0
2000	1019	0.023758	0.052422	-264.777	0.006919	0.027233	cpx	Na0.01Ca0.23Fe''0.79Mg0.89Fe'''0.04Ti0.00Al0.12Si1.92O6	50.114	0.0812034	2.56469	1.3726	0	24.6522	0	15.5358	5.56781	0.111669	0	0
2000	1018	0.023555	0.051942	-262.221	0.006856	0.026983	cpx	Na0.01Ca0.23Fe''0.80Mg0.89Fe'''0.04Ti0.00Al0.12Si1.92O6	50.0821	0.0814623	2.56258	1.37882	0	24.7744	0	15.4586	5.55034	0.111653	0	0
2000	1017	0.023355	0.051468	-259.696	0.006795	0.026737	cpx	Na0.01Ca0.23Fe''0.80Mg0.88Fe'''0.04Ti0.00Al0.12Si1.92O6	50.0501	0.0817187	2.56045	1.3851	0	24.8972	0	15.381	5.53286	0.111634	0	0
2000	1016	0.023158	0.050999	-257.2	0.006733	0.026494	cpx	Na0.01Ca0.23Fe''0.80Mg0.88Fe'''0.04Ti0.00Al0.12Si1.92O6	50.0178	0.0819724	2.55832	1.39143	0	25.0205	0	15.303	5.51537	0.111613	0	0
2000	1015	0.022962	0.050535	-254.733	0.006673	0.026253	cpx	Na0.01Ca0.23Fe''0.81Mg0.87Fe'''0.04Ti0.00Al0.12Si1.92O6	49.9855	0.0822235	2.55617	1.39781	0	25.1443	0	15.2245	5.49787	0.111589	0	0
2000	1014	0.022769	0.050077	-252.293	0.006613	0.026015	cpx	Na0.01Ca0.23Fe''0.81Mg0.87Fe'''0.04Ti0.00Al0.12Si1.92O6	49.9529	0.0824716	2.55401	1.40425	0	25.2687	0	15.1457	5.48037	0.111563	0	0
2000	1013	0.022578	0.049624	-249.88	0.006554	0.02578	cpx	Na0.01Ca0.23Fe''0.82Mg0.87Fe'''0.04Ti0.00Al0.12Si1.92O6	49.9202	0.0827168	2.55183	1.41073	0	25.3935	0	15.0665	5.46287	0.111534	0	0
2000	1012	0.022389	0.049176	-247.494	0.006496	0.025547	cpx	Na0.01Ca0.22Fe''0.82Mg0.86Fe'''0.04Ti0.00Al0.12Si1.92O6	49.8874	0.0829588	2.54964	1.41727	0	25.5189	0	14.9869	5.44537	0.111504	0	0
2000	1011	0.022202	0.048733	-245.133	0.006438	0.025317	cpx	Na0.01Ca0.22Fe''0.83Mg0.86Fe'''0.04Ti0.00Al0.12Si1.92O6	49.8544	0.0831976	2.54744	1.42386	0	25.6448	0	14.9069	5.42788	0.11147	0	0
2000	1010	0.022017	0.048294	-242.797	0.006381	0.025089	cpx	Na0.01Ca0.22Fe''0.83Mg0.85Fe'''0.04Ti0.00Al0.12Si1.92O6	49.8212	0.083433	2.54522	1.43051	0	25.7713	0	14.8266	5.41038	0.111434	0	0
2000	1009	0.021834	0.04786	-240.484	0.006324	0.024864	cpx	Na0.01Ca0.22Fe''0.84Mg0.85Fe'''0.04Ti0.00Al0.12Si1.92O6	49.7879	0.0836648	2.54297	1.4372	0	25.8982	0	14.7458	5.3929	0.111396	0	0
2000	1008	0.021652	0.04743	-238.195	0.006268	0.02464	cpx	Na0.01Ca0.22Fe''0.84Mg0.84Fe'''0.04Ti0.00Al0.12Si1.92O6	49.7544	0.0838928	2.54071	1.44395	0	26.0256	0	14.6646	5.37543	0.111356	0	0
2000	1007	0.021473	0.047005	-235.929	0.006213	0.024419	cpx	Na0.01Ca0.22Fe''0.85Mg0.84Fe'''0.04Ti0.00Al0.12Si1.92O6	49.7208	0.084117	2.53843	1.45075	0	26.1535	0	14.5831	5.35796	0.111313	0	0
2000	1006	0.021295	0.046583	-233.684	0.006158	0.0242	cpx	Na0.01Ca0.22Fe''0.85Mg0.84Fe'''0.04Ti0.00Al0.12Si1.92O6	49.687	0.0843371	2.53613	1.45759	0	26.2819	0	14.5012	5.34052	0.111267	0	0
2000	1005	0.021118	0.046165	-231.459	0.006103	0.023983	cpx	Na0.01Ca0.22Fe''0.86Mg0.83Fe'''0.04Ti0.00Al0.12Si1.92O6	49.6531	0.0845529	2.53381	1.46449	0	26.4108	0	14.4189	5.32309	0.111219	0	0
2000	1004	0.020943	0.045752	-229.255	0.006049	0.023768	cpx	Na0.01Ca0.22Fe''0.86Mg0.83Fe'''0.04Ti0.00Al0.12Si1.92O6	49.6191	0.0847642	2.53146	1.47144	0	26.5402	0	14.3363	5.30568	0.111169	0	0
2000	1003	0.020769	0.045341	-227.07	0.005995	0.023555	cpx	Na0.01Ca0.22Fe''0.86Mg0.82Fe'''0.04Ti0.00Al0.12Si1.92O6	49.5849	0.0849709	2.52909	1.47844	0	26.67	0	14.2532	5.28829	0.111116	0	0
2000	1002	0.020597	0.044934	-224.903	0.005942	0.023343	cpx	Na0.01Ca0.22Fe''0.87Mg0.82Fe'''0.04Ti0.00Al0.12Si1.92O6	49.5506	0.0851727	2.52669	1.48549	0	26.8003	0	14.1698	5.27092	0.111061	0	0
2000	1001	0.020426	0.04453	-222.753	0.00589	0.023133	cpx	Na0.01Ca0.22Fe''0.87Mg0.82Fe'''0.04Ti0.00Al0.12Si1.92O6	49.5161	0.0853693	2.52427	1.49259	0	26.931	0	14.0861	5.25359	0.111004	0	0
2000	1000	0.020256	0.044129	-220.618	0.005837	0.022925	cpx	Na0.01Ca0.22Fe''0.88Mg0.81Fe'''0.04Ti0.00Al0.12Si1.92O6	49.4815	0.0855605	2.52181	1.49974	0	27.0622	0	14.002	5.23629	0.110944	0	0
2000	999	0.020087	0.043731	-218.499	0.005785	0.022717	cpx	Na0.01Ca0.22Fe''0.88Mg0.81Fe'''0.04Ti0.00Al0.12Si1.92O6	49.4468	0.0857461	2.51933	1.50693	0	27.1938	0	13.9175	5.21902	0.110882	0	0
2000	998	0.019919	0.043335	-216.392	0.005733	0.022511	cpx	Na0.01Ca0.22Fe''0.89Mg0.80Fe'''0.04Ti0.00Al0.12Si1.92O6	49.4119	0.0859257	2.51681	1.51417	0	27.3258	0	13.8327	5.20178	0.110818	0	0
2000	997	0.019752	0.04294	-214.295	0.005682	0.022306	cpx	Na0.01Ca0.22Fe''0.89Mg0.80Fe'''0.04Ti0.00Al0.12Si1.92O6	49.377	0.0860991	2.51426	1.52146	0	27.4583	0	13.7476	5.18459	0.110751	0	0
2000	996	0.019585	0.042547	-212.206	0.005631	0.022102	cpx	Na0.01Ca0.22Fe''0.90Mg0.79Fe'''0.04Ti0.00Al0.12Si1.92O6	49.3419	0.0862657	2.51168	1.52878	0	27.5911	0	13.6621	5.16744	0.110682	0	0
2000	995	0.019418	0.042155	-210.121	0.005579	0.021898	cpx	Na0.01Ca0.22Fe''0.90Mg0.79Fe'''0.05Ti0.00Al0.12Si1.92O6	49.3067	0.0864252	2.50906	1.53615	0	27.7243	0	13.5764	5.15034	0.11061	0	0
2000	994	0.01925	0.041761	-208.035	0.005528	0.021693	cpx	Na0.01Ca0.21Fe''0.91Mg0.78Fe'''0.05Ti0.00Al0.12Si1.92O6	49.2715	0.0865771	2.5064	1.54356	0	27.8579	0	13.4903	5.13328	0.110536	0	0
2000	993	0.019081	0.041366	-205.938	0.005476	0.021487	cpx	Na0.01Ca0.21Fe''0.91Mg0.78Fe'''0.05Ti0.00Al0.12Si1.92O6	49.2361	0.0867206	2.50369	1.55101	0	27.9918	0	13.4039	5.11629	0.11046	0	0
2000	992	0.01891	0.040965	-203.819	0.005424	0.021279	cpx	Na0.01Ca0.21Fe''0.92Mg0.78Fe'''0.05Ti0.00Al0.12Si1.92O6	49.2006	0.0868548	2.50094	1.55849	0	28.1261	0	13.3173	5.09935	0.110382	0	0
2000	991	0.018734	0.040555	-201.655	0.00537	0.021066	cpx	Na0.01Ca0.21Fe''0.92Mg0.77Fe'''0.05Ti0.00Al0.12Si1.92O6	49.1651	0.0869785	2.49814	1.56599	0	28.2606	0	13.2304	5.08249	0.110301	0	0
2000	990	0.01855	0.040128	-199.406	0.005314	0.020844	cpx	Na0.01Ca0.21Fe''0.93Mg0.77Fe'''0.05Ti0.00Al0.11Si1.92O6	49.1296	0.0870895	2.49528	1.57351	0	28.3953	0	13.1433	5.0657	0.110218	0	0
2000	989	0.01835	0.039666	-196.993	0.005254	0.020604	cpx	Na0.01Ca0.21Fe''0.93Mg0.76Fe'''0.05Ti0.00Al0.11Si1.92O6	49.0941	0.0871844	2.49235	1.58103	0	28.53	0	13.0562	5.04901	0.110133	0	0
2000	988	0.018115	0.039132	-194.22	0.005183	0.020326	cpx	Na0.01Ca0.21Fe''0.94Mg0.76Fe'''0.05Ti0.00Al0.11Si1.92O6	49.0587	0.0872561	2.48932	1.58851	0	28.6647	0	12.9691	5.03244	0.110045	0	0
2000	987	0.017792	0.038407	-190.502	0.005088	0.019949	cpx	Na0.01Ca0.21Fe''0.94Mg0.75Fe'''0.05Ti0.00Al0.11Si1.92O6	49.0236	0.0872868	2.48613	1.59586	0	28.7987	0	12.8824	5.01607	0.109954	0	0
2000	986	0.019454	0.041962	-207.986	0.00556	0.021795	cpx	Na0.01Ca0.21Fe''0.95Mg0.75Fe'''0.05Ti0.00Al0.11Si1.92O6	48.9838	0.0876607	2.48415	1.60499	0	28.9435	0	12.7876	4.99839	0.109867	0	0
2000	985	0.013427	0.028943	-143.403	0.003835	0.015034	cpx	Na0.01Ca0.21Fe''0.95Mg0.74Fe'''0.05Ti0.00Al0.11Si1.92O6	48.9591	0.0868768	2.47802	1.60848	0	29.0542	0	12.7182	4.98532	0.109762	0	0
2000	984	0.01138	0.024514	-121.423	0.003249	0.012734	cpx	Na0.01Ca0.21Fe''0.96Mg0.74Fe'''0.05Ti0.00Al0.11Si1.92O6	48.9393	0.0857267	2.47055	1.61012	0	29.1538	0	12.6571	4.97377	0.109651	0	0
2000	983	0.011255	0.024229	-119.979	0.003212	0.012588	cpx	Na0.01Ca0.21Fe''0.96Mg0.74Fe'''0.05Ti0.00Al0.11Si1.92O6	48.9195	0.0845891	2.46308	1.61177	0	29.2535	0	12.5958	4.96224	0.109539	0	0
2000	982	0.011132	0.023949	-118.555	0.003176	0.012443	cpx	Na0.01Ca0.21Fe''0.96Mg0.73Fe'''0.05Ti0.00Al0.11Si1.92O6	48.8996	0.083464	2.45562	1.61342	0	29.3533	0	12.5344	4.95074	0.109426	0	0
2000	981	0.01101	0.023672	-117.152	0.00314	0.012301	cpx	Na0.01Ca0.21Fe''0.97Mg0.73Fe'''0.05Ti0.00Al0.11Si1.92O6	48.8796	0.0823511	2.44817	1.61508	0	29.4533	0	12.4729	4.93927	0.109312	0	0
2000	980	0.01089	0.023399	-115.768	0.003104	0.01216	cpx	Na0.01Ca0.21Fe''0.97Mg0.73Fe'''0.05Ti0.00Al0.11Si1.92O6	48.8596	0.0812504	2.44073	1.61675	0	29.5534	0	12.4113	4.92782	0.109197	0	0
2000	979	0.010772	0.02313	-114.403	0.003069	0.012021	cpx	Na0.01Ca0.21Fe''0.98Mg0.72Fe'''0.05Ti0.00Al0.11Si1.92O6	48.8395	0.0801618	2.4333	1.61843	0	29.6536	0	12.3496	4.9164	0.109082	0	0
2000	978	0.010656	0.022864	-113.058	0.003035	0.011885	cpx	Na0.01Ca0.21Fe''0.98Mg0.72Fe'''0.05Ti0.00Al0.11Si1.92O6	48.8193	0.0790852	2.42587	1.62011	0	29.754	0	12.2877	4.90501	0.108966	0	0
2000	977	0.01054	0.022603	-111.731	0.003	0.01175	cpx	Na0.01Ca0.21Fe''0.98Mg0.72Fe'''0.05Ti0.00Al0.11Si1.92O6	48.7991	0.0780204	2.41845	1.6218	0	29.8545	0	12.2257	4.89365	0.108848	0	0
2000	976	0.010427	0.022344	-110.422	0.002967	0.011617	cpx	Na0.01Ca0.21Fe''0.99Mg0.71Fe'''0.05Ti0.00Al0.11Si1.92O6	48.7788	0.0769674	2.41104	1.62349	0	29.9551	0	12.1636	4.88232	0.10873	0	0
2000	975	0.010315	0.02209	-109.131	0.002934	0.011485	cpx	Na0.01Ca0.21Fe''0.99Mg0.71Fe'''0.05Ti0.00Al0.11Si1.92O6	48.7585	0.075926	2.40363	1.62519	0	30.0558	0	12.1013	4.87102	0.108611	0	0
2000	974	0.010204	0.021838	-107.857	0.002901	0.011356	cpx	Na0.01Ca0.21Fe''0.99Mg0.71Fe'''0.05Ti0.00Al0.11Si1.92O6	48.7381	0.0748961	2.39623	1.62689	0	30.1566	0	12.039	4.85976	0.108492	0	0
2000	973	0.010095	0.02159	-106.601	0.002869	0.011228	cpx	Na0.01Ca0.20Fe''1.00Mg0.70Fe'''0.05Ti0.00Al0.11Si1.92O6	48.7177	0.0738777	2.38884	1.6286	0	30.2576	0	11.9765	4.84852	0.108371	0	0
2000	972	0.009987	0.021346	-105.361	0.002837	0.011102	cpx	Na0.01Ca0.20Fe''1.00Mg0.70Fe'''0.05Ti0.00Al0.11Si1.92O6	48.6972	0.0728706	2.38145	1.63032	0	30.3587	0	11.9139	4.83733	0.10825	0	0
2000	971	0.009881	0.021104	-104.138	0.002805	0.010977	cpx	Na0.01Ca0.20Fe''1.01Mg0.70Fe'''0.05Ti0.00Al0.11Si1.92O6	48.6767	0.0718748	2.37406	1.63204	0	30.4599	0	11.8512	4.82616	0.108128	0	0
2000	970	0.009776	0.020866	-102.932	0.002774	0.010855	cpx	Na0.01Ca0.20Fe''1.01Mg0.69Fe'''0.05Ti0.00Al0.11Si1.92O6	48.6561	0.07089	2.36668	1.63376	0	30.5612	0	11.7884	4.81503	0.108005	0	0
2000	969	0.009672	0.020631	-101.741	0.002744	0.010733	cpx	Na0.01Ca0.20Fe''1.01Mg0.69Fe'''0.05Ti0.00Al0.11Si1.92O6	48.6354	0.0699163	2.3593	1.63548	0	30.6625	0	11.7255	4.80394	0.107881	0	0
2000	968	0.009569	0.020399	-100.566	0.002713	0.010614	cpx	Na0.01Ca0.20Fe''1.02Mg0.69Fe'''0.05Ti0.00Al0.11Si1.92O6	48.6148	0.0689535	2.35193	1.63721	0	30.764	0	11.6625	4.79289	0.107757	0	0
2000	967	0.009468	0.02017	-99.4065	0.002683	0.010495	cpx	Na0.01Ca0.20Fe''1.02Mg0.68Fe'''0.05Ti0.00Al0.11Si1.92O6	48.594	0.0680016	2.34456	1.63894	0	30.8656	0	11.5993	4.78188	0.107631	0	0
2000	966	0.009368	0.019943	-98.2619	0.002654	0.010379	cpx	Na0.01Ca0.20Fe''1.03Mg0.68Fe'''0.05Ti0.00Al0.11Si1.92O6	48.5733	0.0670603	2.33719	1.64067	0	30.9673	0	11.5361	4.7709	0.107505	0	0
2000	965	0.00927	0.01972	-97.1321	0.002625	0.010264	cpx	Na0.01Ca0.20Fe''1.03Mg0.68Fe'''0.05Ti0.00Al0.11Si1.92O6	48.5524	0.0661297	2.32982	1.64241	0	31.0691	0	11.4728	4.75996	0.107379	0	0
2000	964	0.009172	0.0195	-96.0168	0.002596	0.01015	cpx	Na0.01Ca0.20Fe''1.03Mg0.67Fe'''0.05Ti0.00Al0.11Si1.92O6	48.5316	0.0652097	2.32246	1.64414	0	31.1709	0	11.4094	4.74907	0.107251	0	0
2000	963	0.009076	0.019282	-94.9158	0.002568	0.010038	cpx	Na0.01Ca0.20Fe''1.04Mg0.67Fe'''0.05Ti0.00Al0.11Si1.92O6	48.5107	0.0643	2.3151	1.64588	0	31.2728	0	11.3458	4.73821	0.107123	0	0
2000	962	0.008981	0.019067	-93.8288	0.00254	0.009927	cpx	Na0.01Ca0.20Fe''1.04Mg0.67Fe'''0.05Ti0.00Al0.11Si1.92O6	48.4898	0.0634007	2.30774	1.64761	0	31.3748	0	11.2822	4.7274	0.106994	0	0
2000	961	0.008887	0.018855	-92.7555	0.002512	0.009817	cpx	Na0.01Ca0.20Fe''1.04Mg0.66Fe'''0.05Ti0.00Al0.11Si1.92O6	48.4688	0.0625117	2.30038	1.64935	0	31.4769	0	11.2185	4.71663	0.106864	0	0
2000	960	0.008794	0.018645	-91.6957	0.002485	0.009709	cpx	Na0.01Ca0.20Fe''1.05Mg0.66Fe'''0.05Ti0.00Al0.11Si1.92O6	48.4478	0.0616328	2.29303	1.65109	0	31.5791	0	11.1547	4.70591	0.106734	0	0
2000	959	0.008702	0.018438	-90.649	0.002458	0.009602	cpx	Na0.01Ca0.20Fe''1.05Mg0.66Fe'''0.05Ti0.00Al0.11Si1.92O6	48.4268	0.060764	2.28567	1.65282	0	31.6813	0	11.0909	4.69523	0.106603	0	0
2000	958	0.008611	0.018233	-89.6154	0.002431	0.009496	cpx	Na0.01Ca0.20Fe''1.06Mg0.65Fe'''0.05Ti0.00Al0.11Si1.92O6	48.4057	0.0599051	2.27831	1.65456	0	31.7836	0	11.0269	4.68459	0.106471	0	0
2000	957	0.008522	0.018031	-88.5945	0.002404	0.009392	cpx	Na0.01Ca0.20Fe''1.06Mg0.65Fe'''0.05Ti0.00Al0.11Si1.92O6	48.3846	0.0590562	2.27096	1.65629	0	31.8859	0	10.9629	4.674	0.106339	0	0
2000	956	0.008433	0.017831	-87.5861	0.002378	0.009289	cpx	Na0.01Ca0.20Fe''1.06Mg0.65Fe'''0.05Ti0.00Al0.11Si1.92O6	48.3634	0.058217	2.2636	1.65802	0	31.9883	0	10.8987	4.66346	0.106206	0	0
2000	955	0.008345	0.017634	-86.59	0.002353	0.009187	cpx	Na0.01Ca0.20Fe''1.07Mg0.64Fe'''0.05Ti0.00Al0.11Si1.92O6	48.3423	0.0573875	2.25624	1.65975	0	32.0908	0	10.8345	4.65297	0.106072	0	0
2000	954	0.008259	0.017439	-85.6059	0.002327	0.009087	cpx	Na0.01Ca0.20Fe''1.07Mg0.64Fe'''0.05Ti0.00Al0.11Si1.92O6	48.3211	0.0565677	2.24888	1.66147	0	32.1933	0	10.7703	4.64252	0.105938	0	0
2000	953	0.008173	0.017246	-84.6337	0.002302	0.008987	cpx	Na0.01Ca0.20Fe''1.08Mg0.64Fe'''0.05Ti0.00Al0.11Si1.92O6	48.2999	0.0557573	2.24153	1.66319	0	32.2958	0	10.7059	4.63212	0.105803	0	0
2000	952	0.008088	0.017056	-83.6731	0.002277	0.008889	cpx	Na0.01Ca0.20Fe''1.08Mg0.63Fe'''0.05Ti0.00Al0.10Si1.92O6	48.2786	0.0549564	2.23416	1.66491	0	32.3984	0	10.6415	4.62177	0.105668	0	0
2000	951	0.008004	0.016868	-82.7238	0.002253	0.008792	cpx	Na0.01Ca0.20Fe''1.08Mg0.63Fe'''0.05Ti0.00Al0.10Si1.93O6	48.2574	0.0541649	2.2268	1.66662	0	32.501	0	10.5771	4.61147	0.105532	0	0
2000	950	0.007922	0.016682	-81.7858	0.002228	0.008696	cpx	Na0.01Ca0.20Fe''1.09Mg0.63Fe'''0.05Ti0.00Al0.10Si1.93O6	48.2361	0.0533826	2.21944	1.66833	0	32.6036	0	10.5125	4.60122	0.105395	0	0
2000	949	0.00784	0.016498	-80.8587	0.002204	0.008601	cpx	Na0.01Ca0.20Fe''1.09Mg0.62Fe'''0.05Ti0.00Al0.10Si1.93O6	48.2148	0.0526095	2.21207	1.67003	0	32.7063	0	10.448	4.59102	0.105257	0	0
2000	948	0.007759	0.016316	-79.9424	0.00218	0.008507	cpx	Na0.01Ca0.20Fe''1.10Mg0.62Fe'''0.05Ti0.00Al0.10Si1.93O6	48.1935	0.0518455	2.20471	1.67172	0	32.8089	0	10.3833	4.58088	0.10512	0	0
2000	947	0.007678	0.016136	-79.0366	0.002157	0.008414	cpx	Na0.01Ca0.20Fe''1.10Mg0.61Fe'''0.05Ti0.00Al0.10Si1.93O6	48.1721	0.0510905	2.19733	1.67341	0	32.9116	0	10.3186	4.57078	0.104981	0	0
2000	946	0.007599	0.015958	-78.1413	0.002134	0.008322	cpx	Na0.01Ca0.20Fe''1.10Mg0.61Fe'''0.05Ti0.00Al0.10Si1.93O6	48.1508	0.0503445	2.18996	1.67509	0	33.0144	0	10.2539	4.56074	0.104842	0	0
2000	945	0.007521	0.015782	-77.2562	0.002111	0.008231	cpx	Na0.01Ca0.20Fe''1.11Mg0.61Fe'''0.05Ti0.00Al0.10Si1.93O6	48.1294	0.0496073	2.18259	1.67676	0	33.1171	0	10.1891	4.55075	0.104702	0	0
2000	944	0.007443	0.015609	-76.381	0.002088	0.008142	cpx	Na0.01Ca0.19Fe''1.11Mg0.60Fe'''0.05Ti0.00Al0.10Si1.93O6	48.108	0.0488788	2.17521	1.67842	0	33.2198	0	10.1243	4.54081	0.104562	0	0
2000	943	0.007366	0.015437	-75.5157	0.002065	0.008053	cpx	Na0.01Ca0.19Fe''1.12Mg0.60Fe'''0.05Ti0.00Al0.10Si1.93O6	48.0866	0.0481591	2.16782	1.68008	0	33.3225	0	10.0594	4.53093	0.104421	0	0
2000	942	0.00729	0.015266	-74.6601	0.002043	0.007965	cpx	Na0.01Ca0.19Fe''1.12Mg0.60Fe'''0.05Ti0.00Al0.10Si1.93O6	48.0653	0.047448	2.16044	1.68172	0	33.4252	0	9.99451	4.52111	0.10428	0	0
2000	941	0.007215	0.015098	-73.8139	0.002021	0.007878	cpx	Na0.01Ca0.19Fe''1.12Mg0.59Fe'''0.05Ti0.00Al0.10Si1.93O6	48.0439	0.0467453	2.15305	1.68335	0	33.5279	0	9.92958	4.51134	0.104138	0	0
2000	940	0.00714	0.014932	-72.977	0.001999	0.007792	cpx	Na0.01Ca0.19Fe''1.13Mg0.59Fe'''0.05Ti0.00Al0.10Si1.93O6	48.0225	0.0460512	2.14565	1.68497	0	33.6306	0	9.86461	4.50162	0.103996	0	0
2000	939	0.007066	0.014767	-72.1493	0.001978	0.007707	cpx	Na0.01Ca0.19Fe''1.13Mg0.59Fe'''0.05Ti0.00Al0.10Si1.93O6	48.001	0.0453654	2.13825	1.68658	0	33.7333	0	9.79962	4.49196	0.103853	0	0
2000	938	0.006993	0.014604	-71.3305	0.001956	0.007623	cpx	Na0.01Ca0.19Fe''1.14Mg0.58Fe'''0.05Ti0.00Al0.10Si1.93O6	47.9796	0.0446879	2.13085	1.68818	0	33.836	0	9.73461	4.48236	0.10371	0	0
2000	937	0.006921	0.014442	-70.5205	0.001935	0.007539	cpx	Na0.01Ca0.19Fe''1.14Mg0.58Fe'''0.05Ti0.00Al0.10Si1.93O6	47.9582	0.0440186	2.12344	1.68977	0	33.9386	0	9.66958	4.47282	0.103566	0	0
2000	936	0.006849	0.014283	-69.7192	0.001914	0.007457	cpx	Na0.01Ca0.19Fe''1.14Mg0.58Fe'''0.05Ti0.00Al0.10Si1.93O6	47.9368	0.0433574	2.11603	1.69134	0	34.0412	0	9.60453	4.46333	0.103422	0	0
2000	935	0.006778	0.014125	-68.9263	0.001894	0.007375	cpx	Na0.01Ca0.19Fe''1.15Mg0.57Fe'''0.05Ti0.00Al0.10Si1.93O6	47.9154	0.0427044	2.10862	1.6929	0	34.1437	0	9.53947	4.4539	0.103278	0	0
2000	934	0.006708	0.013968	-68.1418	0.001873	0.007294	cpx	Na0.01Ca0.19Fe''1.15Mg0.57Fe'''0.05Ti0.00Al0.10Si1.93O6	47.894	0.0420593	2.10119	1.69444	0	34.2462	0	9.47441	4.44453	0.103132	0	0
2000	933	0.006638	0.013814	-67.3655	0.001853	0.007214	cpx	Na0.01Ca0.19Fe''1.16Mg0.56Fe'''0.05Ti0.00Al0.10Si1.93O6	47.8726	0.0414221	2.09377	1.69597	0	34.3487	0	9.40933	4.43521	0.102987	0	0
2000	932	0.006569	0.01366	-66.5973	0.001833	0.007135	cpx	Na0.01Ca0.19Fe''1.16Mg0.56Fe'''0.05Ti0.00Al0.10Si1.93O6	47.8513	0.0407927	2.08634	1.69748	0	34.4511	0	9.34426	4.42596	0.102841	0	0
2000	931	0.006501	0.013508	-65.8369	0.001813	0.007057	cpx	Na0.01Ca0.19Fe''1.16Mg0.56Fe'''0.05Ti0.00Al0.10Si1.93O6	47.8299	0.0401711	2.0789	1.69897	0	34.5534	0	9.27919	4.41676	0.102694	0	0
2000	930	0.006433	0.013358	-65.0843	0.001793	0.006979	cpx	Na0.01Ca0.19Fe''1.17Mg0.55Fe'''0.05Ti0.00Al0.10Si1.93O6	47.8085	0.0395573	2.07146	1.70045	0	34.6557	0	9.21412	4.40762	0.102548	0	0
2000	929	0.006366	0.013209	-64.3393	0.001774	0.006902	cpx	Na0.01Ca0.19Fe''1.17Mg0.55Fe'''0.05Ti0.00Al0.10Si1.93O6	47.7872	0.038951	2.06401	1.70191	0	34.7579	0	9.14906	4.39855	0.1024	0	0
2000	928	0.006299	0.013062	-63.6018	0.001754	0.006826	cpx	Na0.01Ca0.19Fe''1.18Mg0.55Fe'''0.05Ti0.00Al0.10Si1.93O6	47.7659	0.0383523	2.05656	1.70335	0	34.8601	0	9.08402	4.38953	0.102253	0	0
2000	927	0.006233	0.012916	-62.8717	0.001735	0.00675	cpx	Na0.01Ca0.19Fe''1.18Mg0.54Fe'''0.05Ti0.00Al0.10Si1.93O6	47.7446	0.037761	2.0491	1.70477	0	34.9621	0	9.01899	4.38057	0.102105	0	0
2000	926	0.006168	0.012771	-62.1488	0.001716	0.006676	cpx	Na0.01Ca0.19Fe''1.18Mg0.54Fe'''0.05Ti0.00Al0.10Si1.93O6	47.7233	0.0371772	2.04163	1.70617	0	35.0641	0	8.95398	4.37168	0.101956	0	0
2000	925	0.006103	0.012628	-61.433	0.001697	0.006601	cpx	Na0.01Ca0.19Fe''1.19Mg0.54Fe'''0.05Ti0.00Al0.10Si1.93O6	47.702	0.0366007	2.03416	1.70756	0	35.166	0	8.889	4.36284	0.101807	0	0
2000	924	0.006039	0.012486	-60.7241	0.001679	0.006528	cpx	Na0.01Ca0.19Fe''1.19Mg0.53Fe'''0.05Ti0.00Al0.10Si1.93O6	47.6808	0.0360315	2.02669	1.70891	0	35.2678	0	8.82404	4.35407	0.101658	0	0
2000	923	0.005975	0.012346	-60.0222	0.00166	0.006455	cpx	Na0.01Ca0.19Fe''1.20Mg0.53Fe'''0.05Ti0.00Al0.10Si1.93O6	47.6595	0.0354695	2.01921	1.71025	0	35.3696	0	8.75912	4.34535	0.101509	0	0
2000	922	0.005912	0.012206	-59.327	0.001642	0.006383	cpx	Na0.01Ca0.19Fe''1.20Mg0.52Fe'''0.05Ti0.00Al0.10Si1.93O6	47.6383	0.0349146	2.01172	1.71157	0	35.4712	0	8.69422	4.3367	0.101359	0	0
2000	921	0.005849	0.012068	-58.6384	0.001624	0.006312	cpx	Na0.01Ca0.19Fe''1.21Mg0.52Fe'''0.05Ti0.00Al0.10Si1.93O6	47.6172	0.0343667	2.00423	1.71286	0	35.5727	0	8.62937	4.32811	0.101208	0	0
2000	920	0.005787	0.011931	-57.9563	0.001606	0.006241	cpx	Na0.01Ca0.19Fe''1.21Mg0.52Fe'''0.05Ti0.00Al0.10Si1.93O6	47.596	0.0338259	1.99673	1.71413	0	35.6741	0	8.56456	4.31958	0.101058	0	0
2000	919	0.005725	0.011796	-57.2807	0.001588	0.006171	cpx	Na0.01Ca0.19Fe''1.21Mg0.51Fe'''0.05Ti0.00Al0.10Si1.93O6	47.5749	0.033292	1.98922	1.71537	0	35.7754	0	8.4998	4.31111	0.100907	0	0
2000	918	0.005664	0.011661	-56.6113	0.00157	0.006102	cpx	Na0.01Ca0.19Fe''1.22Mg0.51Fe'''0.05Ti0.00Al0.09Si1.93O6	47.5539	0.032765	1.98171	1.71659	0	35.8765	0	8.43509	4.3027	0.100756	0	0
2000	917	0.005604	0.011528	-55.9481	0.001553	0.006033	cpx	Na0.01Ca0.19Fe''1.22Mg0.51Fe'''0.05Ti0.00Al0.09Si1.93O6	47.5328	0.0322447	1.97419	1.71778	0	35.9776	0	8.37043	4.29435	0.100604	0	0
2000	916	0.005543	0.011396	-55.2911	0.001535	0.005964	cpx	Na0.01Ca0.19Fe''1.23Mg0.50Fe'''0.05Ti0.00Al0.09Si1.93O6	47.5118	0.0317312	1.96667	1.71895	0	36.0785	0	8.30582	4.28607	0.100452	0	0
2000	915	0.005484	0.011265	-54.64	0.001518	0.005897	cpx	Na0.01Ca0.19Fe''1.23Mg0.50Fe'''0.05Ti0.00Al0.09Si1.93O6	47.4909	0.0312243	1.95914	1.72008	0	36.1792	0	8.24128	4.27785	0.1003	0	0
2000	914	0.005424	0.011135	-53.9949	0.001501	0.00583	cpx	Na0.01Ca0.19Fe''1.23Mg0.50Fe'''0.05Ti0.00Al0.09Si1.93O6	47.47	0.0307241	1.95161	1.72119	0	36.2799	0	8.1768	4.26968	0.100147	0	0
2000	913	0.005366	0.011007	-53.3555	0.001484	0.005763	cpx	Na0.01Ca0.19Fe''1.24Mg0.49Fe'''0.05Ti0.00Al0.09Si1.93O6	47.4491	0.0302304	1.94407	1.72228	0	36.3804	0	8.1124	4.26159	0.0999947	0	0
2000	912	0.005307	0.010879	-52.7219	0.001467	0.005697	cpx	Na0.01Ca0.19Fe''1.24Mg0.49Fe'''0.05Ti0.00Al0.09Si1.93O6	47.4282	0.0297431	1.93652	1.72333	0	36.4807	0	8.04806	4.25355	0.0998417	0	0
2000	911	0.005249	0.010753	-52.0939	0.001451	0.005631	cpx	Na0.01Ca0.19Fe''1.25Mg0.48Fe'''0.05Ti0.00Al0.09Si1.93O6	47.4075	0.0292623	1.92897	1.72435	0	36.5809	0	7.9838	4.24557	0.0996884	0	0
2000	910	0.005192	0.010627	-51.4714	0.001434	0.005567	cpx	Na0.01Ca0.18Fe''1.25Mg0.48Fe'''0.05Ti0.00Al0.09Si1.93O6	47.3867	0.0287878	1.92141	1.72534	0	36.6809	0	7.91962	4.23766	0.0995348	0	0
2000	909	0.005135	0.010503	-50.8544	0.001418	0.005502	cpx	Na0.01Ca0.18Fe''1.25Mg0.48Fe'''0.05Ti0.00Al0.09Si1.93O6	47.366	0.0283196	1.91385	1.7263	0	36.7808	0	7.85552	4.2298	0.099381	0	0
2000	908	0.005078	0.010379	-50.2427	0.001402	0.005438	cpx	Na0.01Ca0.18Fe''1.26Mg0.47Fe'''0.05Ti0.00Al0.09Si1.93O6	47.3454	0.0278576	1.90628	1.72723	0	36.8805	0	7.7915	4.22201	0.0992269	0	0
2000	907	0.005022	0.010257	-49.6364	0.001386	0.005375	cpx	Na0.01Ca0.18Fe''1.26Mg0.47Fe'''0.05Ti0.00Al0.09Si1.93O6	47.3248	0.0274018	1.8987	1.72812	0	36.98	0	7.72758	4.21428	0.0990726	0	0
2000	906	0.004966	0.010136	-49.0352	0.00137	0.005312	cpx	Na0.01Ca0.18Fe''1.27Mg0.47Fe'''0.05Ti0.00Al0.09Si1.93O6	47.3042	0.0269521	1.89112	1.72899	0	37.0794	0	7.66375	4.20661	0.098918	0	0
2000	905	0.004911	0.010015	-48.4392	0.001354	0.00525	cpx	Na0.01Ca0.18Fe''1.27Mg0.46Fe'''0.05Ti0.00Al0.09Si1.93O6	47.2838	0.0265085	1.88354	1.72981	0	37.1786	0	7.60002	4.199	0.0987632	0	0
2000	904	0.004856	0.009896	-47.8483	0.001338	0.005188	cpx	Na0.01Ca0.18Fe''1.27Mg0.46Fe'''0.05Ti0.00Al0.09Si1.93O6	47.2633	0.0260708	1.87595	1.73061	0	37.2776	0	7.5364	4.19146	0.0986082	0	0
2000	903	0.004801	0.009777	-47.2623	0.001322	0.005126	cpx	Na0.01Ca0.18Fe''1.28Mg0.46Fe'''0.05Ti0.00Al0.09Si1.93O6	47.243	0.0256391	1.86835	1.73136	0	37.3764	0	7.47287	4.18397	0.098453	0	0
2000	902	0.004747	0.00966	-46.6813	0.001307	0.005066	cpx	Na0.01Ca0.18Fe''1.28Mg0.45Fe'''0.05Ti0.00Al0.09Si1.93O6	47.2227	0.0252132	1.86075	1.73209	0	37.475	0	7.40945	4.17654	0.0982975	0	0
2000	901	0.004693	0.009543	-46.1051	0.001291	0.005005	cpx	Na0.01Ca0.18Fe''1.29Mg0.45Fe'''0.05Ti0.00Al0.09Si1.93O6	47.2024	0.0247931	1.85315	1.73277	0	37.5734	0	7.34615	4.16918	0.0981418	0	0
2000	900	0.00464	0.009427	-45.5338	0.001276	0.004945	cpx	Na0.01Ca0.18Fe''1.29Mg0.44Fe'''0.05Ti0.00Al0.09Si1.93O6	47.1822	0.0243788	1.84554	1.73342	0	37.6716	0	7.28296	4.16187	0.097986	0	0
feldspar_0	thermodynamic	data	and	composition:
Pressure	Temperature	mass	S	H	V	Cp	formula	SiO2	TiO2	Al2O3	Fe2O3	Cr2O3	FeO	MnO	MgO	CaO	Na2O	K2O	H2O	An
2000	1204	0.456671	1.12133	-6267.96	0.17124	0.563291	K0.00Na0.25Ca0.75Al1.75Si2.25O8	49.404	0	32.4633	0	0	0	0	0	15.2548	2.8658	0.0121153	0	75
2000	1203	0.938264	2.30333	-12878.8	0.351854	1.15724	K0.00Na0.25Ca0.74Al1.74Si2.26O8	49.4397	0	32.4392	0	0	0	0	0	15.2266	2.88221	0.0123307	0
2000	1202	0.910806	2.2354	-12502.7	0.341586	1.12329	K0.00Na0.26Ca0.74Al1.74Si2.26O8	49.4752	0	32.4152	0	0	0	0	0	15.1985	2.89848	0.0125467	0
2000	1201	0.884535	2.17042	-12142.9	0.33176	1.09082	K0.00Na0.26Ca0.74Al1.74Si2.26O8	49.5104	0	32.3915	0	0	0	0	0	15.1707	2.91464	0.0127635	0
2000	1200	0.859385	2.10821	-11798.4	0.322353	1.05973	K0.00Na0.26Ca0.74Al1.74Si2.26O8	49.5453	0	32.3679	0	0	0	0	0	15.1431	2.93068	0.012981	0
2000	1199	0.835292	2.04862	-11468.4	0.313341	1.02994	K0.00Na0.26Ca0.74Al1.74Si2.26O8	49.58	0	32.3445	0	0	0	0	0	15.1157	2.9466	0.0131992	0
2000	1198	0.812197	1.99151	-11152.1	0.304702	1.0014	K0.00Na0.26Ca0.74Al1.74Si2.26O8	49.6145	0	32.3212	0	0	0	0	0	15.0885	2.96241	0.0134181	0
2000	1197	0.790047	1.93673	-10848.7	0.296415	0.974016	K0.00Na0.26Ca0.74Al1.74Si2.26O8	49.6487	0	32.2981	0	0	0	0	0	15.0614	2.9781	0.0136377	0
2000	1196	0.76879	1.88417	-10557.5	0.288462	0.947741	K0.00Na0.26Ca0.73Al1.73Si2.27O8	49.6827	0	32.2752	0	0	0	0	0	15.0346	2.99369	0.0138581	0
2000	1195	0.748379	1.83371	-10277.9	0.280826	0.922512	K0.00Na0.27Ca0.73Al1.73Si2.27O8	49.7164	0	32.2524	0	0	0	0	0	15.0079	3.00917	0.0140791	0
2000	1194	0.728769	1.78523	-10009.2	0.273488	0.898275	K0.00Na0.27Ca0.73Al1.73Si2.27O8	49.7499	0	32.2298	0	0	0	0	0	14.9814	3.02454	0.0143008	0
2000	1193	0.70992	1.73863	-9750.98	0.266435	0.874978	K0.00Na0.27Ca0.73Al1.73Si2.27O8	49.7832	0	32.2073	0	0	0	0	0	14.9551	3.03981	0.0145231	0
2000	1192	0.691792	1.69382	-9502.62	0.25965	0.852573	K0.00Na0.27Ca0.73Al1.73Si2.27O8	49.8163	0	32.185	0	0	0	0	0	14.929	3.05499	0.0147462	0
2000	1191	0.674348	1.65071	-9263.64	0.253122	0.831014	K0.00Na0.27Ca0.73Al1.73Si2.27O8	49.8492	0	32.1628	0	0	0	0	0	14.903	3.07006	0.0149699	0
2000	1190	0.657555	1.60921	-9033.56	0.246837	0.810261	K0.00Na0.27Ca0.73Al1.73Si2.27O8	49.8818	0	32.1407	0	0	0	0	0	14.8772	3.08504	0.0151943	0
2000	1189	0.641381	1.56924	-8811.95	0.240783	0.790273	K0.00Na0.27Ca0.73Al1.73Si2.27O8	49.9143	0	32.1188	0	0	0	0	0	14.8515	3.09992	0.0154194	0
2000	1188	0.574301	1.40485	-7890.77	0.215629	0.707578	K0.00Na0.28Ca0.72Al1.72Si2.28O8	49.9663	0	32.0837	0	0	0	0	0	14.8105	3.12384	0.0156695	0
2000	1187	0.572635	1.40049	-7868.33	0.215028	0.705479	K0.00Na0.28Ca0.72Al1.72Si2.28O8	50.0128	0	32.0524	0	0	0	0	0	14.7737	3.14519	0.0159138	0
2000	1186	0.557587	1.36341	-7662.01	0.209401	0.686895	K0.00Na0.28Ca0.72Al1.72Si2.28O8	50.0591	0	32.0211	0	0	0	0	0	14.7371	3.1665	0.016159	0
2000	1185	0.543159	1.32785	-7464.2	0.204006	0.669079	K0.00Na0.28Ca0.72Al1.72Si2.28O8	50.1054	0	31.9899	0	0	0	0	0	14.7006	3.18775	0.0164052	0
2000	1184	0.529319	1.29375	-7274.42	0.19883	0.651987	K0.00Na0.28Ca0.72Al1.72Si2.28O8	50.1516	0	31.9587	0	0	0	0	0	14.6641	3.20896	0.0166522	0
2000	1183	0.516033	1.26101	-7092.25	0.193862	0.635581	K0.00Na0.29Ca0.71Al1.71Si2.29O8	50.1976	0	31.9276	0	0	0	0	0	14.6277	3.23013	0.0169003	0
2000	1182	0.503273	1.22957	-6917.28	0.189089	0.619824	K0.00Na0.29Ca0.71Al1.71Si2.29O8	50.2436	0	31.8966	0	0	0	0	0	14.5914	3.25125	0.0171493	0
2000	1181	0.49101	1.19936	-6749.14	0.184503	0.604683	K0.00Na0.29Ca0.71Al1.71Si2.29O8	50.2895	0	31.8657	0	0	0	0	0	14.5551	3.27232	0.0173993	0
2000	1180	0.479221	1.17032	-6587.47	0.180093	0.590125	K0.00Na0.29Ca0.71Al1.71Si2.29O8	50.3353	0	31.8348	0	0	0	0	0	14.519	3.29336	0.0176503	0
2000	1179	0.467879	1.14238	-6431.95	0.175851	0.576121	K0.00Na0.29Ca0.71Al1.71Si2.29O8	50.381	0	31.8039	0	0	0	0	0	14.4828	3.31435	0.0179022	0
2000	1178	0.456963	1.11549	-6282.26	0.171767	0.562643	K0.00Na0.29Ca0.70Al1.70Si2.30O8	50.4266	0	31.7731	0	0	0	0	0	14.4468	3.33531	0.0181553	0
2000	1177	0.446452	1.0896	-6138.11	0.167835	0.549664	K0.00Na0.30Ca0.70Al1.70Si2.30O8	50.4721	0	31.7424	0	0	0	0	0	14.4108	3.35622	0.0184093	0
2000	1176	0.436325	1.06466	-5999.24	0.164046	0.537161	K0.00Na0.30Ca0.70Al1.70Si2.30O8	50.5176	0	31.7117	0	0	0	0	0	14.3749	3.3771	0.0186644	0
2000	1175	0.430885	1.05116	-5924.79	0.162019	0.530429	K0.00Na0.30Ca0.70Al1.70Si2.30O8	50.5635	0	31.6808	0	0	0	0	0	14.3387	3.39816	0.0189226	0
2000	1174	0.428484	1.04507	-5892.12	0.161134	0.527438	K0.00Na0.30Ca0.70Al1.70Si2.30O8	50.6087	0	31.6502	0	0	0	0	0	14.3029	3.41894	0.0191831	0
2000	1173	0.418834	1.02132	-5759.76	0.157522	0.515526	K0.00Na0.30Ca0.70Al1.70Si2.30O8	50.6539	0	31.6198	0	0	0	0	0	14.2672	3.43968	0.0194446	0
2000	1172	0.40953	0.998415	-5632.15	0.15404	0.50404	K0.00Na0.31Ca0.69Al1.69Si2.31O8	50.699	0	31.5893	0	0	0	0	0	14.2316	3.46038	0.0197072	0
2000	1171	0.400555	0.976322	-5509.05	0.150681	0.492962	K0.00Na0.31Ca0.69Al1.69Si2.31O8	50.744	0	31.559	0	0	0	0	0	14.1961	3.48104	0.0199708	0
2000	1170	0.391894	0.955003	-5390.24	0.147439	0.48227	K0.00Na0.31Ca0.69Al1.69Si2.31O8	50.7889	0	31.5286	0	0	0	0	0	14.1606	3.50167	0.0202355	0
2000	1169	0.383532	0.934421	-5275.54	0.144308	0.471948	K0.00Na0.31Ca0.69Al1.69Si2.31O8	50.8337	0	31.4984	0	0	0	0	0	14.1251	3.52226	0.0205012	0
2000	1168	0.375455	0.914543	-5164.75	0.141285	0.461979	K0.00Na0.31Ca0.69Al1.69Si2.31O8	50.8785	0	31.4682	0	0	0	0	0	14.0898	3.54281	0.0207681	0
2000	1167	0.36765	0.895335	-5057.7	0.138363	0.452345	K0.00Na0.31Ca0.68Al1.68Si2.32O8	50.9232	0	31.438	0	0	0	0	0	14.0544	3.56333	0.021036	0
2000	1166	0.360106	0.876769	-4954.2	0.135538	0.443033	K0.00Na0.32Ca0.68Al1.68Si2.32O8	50.9678	0	31.4079	0	0	0	0	0	14.0192	3.58382	0.021305	0
2000	1165	0.35281	0.858815	-4854.12	0.132807	0.434029	K0.00Na0.32Ca0.68Al1.68Si2.32O8	51.0124	0	31.3778	0	0	0	0	0	13.984	3.60427	0.0215752	0
2000	1164	0.345752	0.841447	-4757.3	0.130164	0.425317	K0.00Na0.32Ca0.68Al1.68Si2.32O8	51.0568	0	31.3478	0	0	0	0	0	13.9488	3.62468	0.0218465	0
2000	1163	0.338921	0.824639	-4663.59	0.127606	0.416886	K0.00Na0.32Ca0.68Al1.68Si2.32O8	51.1013	0	31.3178	0	0	0	0	0	13.9137	3.64506	0.0221189	0
2000	1162	0.332308	0.808368	-4572.86	0.125129	0.408729	K0.00Na0.32Ca0.68Al1.68Si2.32O8	51.1456	0	31.2879	0	0	0	0	0	13.8787	3.66541	0.0223925	0
2000	1161	0.325903	0.792609	-4484.99	0.12273	0.400824	K0.00Na0.32Ca0.67Al1.67Si2.33O8	51.1899	0	31.258	0	0	0	0	0	13.8437	3.68573	0.0226673	0
2000	1160	0.319697	0.777342	-4399.85	0.120406	0.393165	K0.00Na0.33Ca0.67Al1.67Si2.33O8	51.2341	0	31.2282	0	0	0	0	0	13.8088	3.70602	0.0229432	0
2000	1159	0.313682	0.762545	-4317.33	0.118154	0.385742	K0.00Na0.33Ca0.67Al1.67Si2.33O8	51.2782	0	31.1984	0	0	0	0	0	13.7739	3.72627	0.0232204	0
2000	1158	0.307851	0.748201	-4237.33	0.115969	0.378546	K0.00Na0.33Ca0.67Al1.67Si2.33O8	51.3223	0	31.1686	0	0	0	0	0	13.7391	3.74649	0.0234987	0
2000	1157	0.302195	0.734289	-4159.73	0.113851	0.371567	K0.00Na0.33Ca0.67Al1.67Si2.33O8	51.3663	0	31.1389	0	0	0	0	0	13.7043	3.76668	0.0237782	0
2000	1156	0.296708	0.720793	-4084.45	0.111796	0.364795	K0.00Na0.33Ca0.67Al1.67Si2.33O8	51.4102	0	31.1093	0	0	0	0	0	13.6696	3.78684	0.0240589	0
2000	1155	0.291383	0.707695	-4011.39	0.109801	0.358224	K0.00Na0.34Ca0.66Al1.66Si2.34O8	51.4541	0	31.0797	0	0	0	0	0	13.635	3.80697	0.0243409	0
2000	1154	0.286214	0.694981	-3940.46	0.107864	0.351845	K0.00Na0.34Ca0.66Al1.66Si2.34O8	51.4979	0	31.0501	0	0	0	0	0	13.6003	3.82706	0.0246241	0
2000	1153	0.281194	0.682634	-3871.57	0.105983	0.34565	K0.00Na0.34Ca0.66Al1.66Si2.34O8	51.5416	0	31.0206	0	0	0	0	0	13.5658	3.84713	0.0249086	0
2000	1152	0.276317	0.670641	-3804.66	0.104156	0.339632	K0.00Na0.34Ca0.66Al1.66Si2.34O8	51.5853	0	30.9911	0	0	0	0	0	13.5313	3.86716	0.0251943	0
2000	1151	0.271578	0.658988	-3739.64	0.102381	0.333785	K0.00Na0.34Ca0.66Al1.66Si2.34O8	51.6289	0	30.9617	0	0	0	0	0	13.4968	3.88717	0.0254812	0
2000	1150	0.266972	0.647662	-3676.44	0.100655	0.328102	K0.00Na0.34Ca0.65Al1.65Si2.35O8	51.6724	0	30.9323	0	0	0	0	0	13.4624	3.90714	0.0257694	0
2000	1149	0.262494	0.636651	-3614.99	0.098977	0.322577	K0.00Na0.35Ca0.65Al1.65Si2.35O8	51.7159	0	30.9029	0	0	0	0	0	13.428	3.92709	0.0260589	0
2000	1148	0.258139	0.625943	-3555.22	0.097345	0.317203	K0.00Na0.35Ca0.65Al1.65Si2.35O8	51.7593	0	30.8736	0	0	0	0	0	13.3937	3.947	0.0263497	0
2000	1147	0.253902	0.615526	-3497.08	0.095757	0.311975	K0.00Na0.35Ca0.65Al1.65Si2.35O8	51.8027	0	30.8443	0	0	0	0	0	13.3594	3.96688	0.0266418	0
2000	1146	0.24978	0.60539	-3440.51	0.094212	0.306889	K0.00Na0.35Ca0.65Al1.65Si2.35O8	51.846	0	30.8151	0	0	0	0	0	13.3252	3.98674	0.0269352	0
2000	1145	0.245767	0.595524	-3385.44	0.092708	0.301938	K0.00Na0.35Ca0.65Al1.65Si2.35O8	51.8892	0	30.7859	0	0	0	0	0	13.2911	4.00656	0.0272299	0
2000	1144	0.24186	0.58592	-3331.83	0.091243	0.297118	K0.00Na0.35Ca0.64Al1.64Si2.36O8	51.9324	0	30.7568	0	0	0	0	0	13.257	4.02635	0.0275259	0
2000	1143	0.238055	0.576567	-3279.61	0.089817	0.292423	K0.00Na0.36Ca0.64Al1.64Si2.36O8	51.9755	0	30.7277	0	0	0	0	0	13.2229	4.04612	0.0278233	0
2000	1142	0.234349	0.567456	-3228.75	0.088428	0.287851	K0.00Na0.36Ca0.64Al1.64Si2.36O8	52.0185	0	30.6986	0	0	0	0	0	13.1889	4.06585	0.0281219	0
2000	1141	0.230738	0.55858	-3179.19	0.087074	0.283396	K0.00Na0.36Ca0.64Al1.64Si2.36O8	52.0615	0	30.6696	0	0	0	0	0	13.1549	4.08555	0.028422	0
2000	1140	0.227219	0.549929	-3130.89	0.085755	0.279054	K0.00Na0.36Ca0.64Al1.64Si2.36O8	52.1044	0	30.6407	0	0	0	0	0	13.121	4.10522	0.0287233	0
2000	1139	0.223788	0.541497	-3083.8	0.084468	0.274821	K0.00Na0.36Ca0.64Al1.64Si2.36O8	52.1472	0	30.6117	0	0	0	0	0	13.0871	4.12487	0.0290261	0
2000	1138	0.220442	0.533275	-3037.89	0.083214	0.270694	K0.00Na0.36Ca0.63Al1.63Si2.37O8	52.19	0	30.5828	0	0	0	0	0	13.0533	4.14448	0.0293302	0
2000	1137	0.21718	0.525256	-2993.11	0.081991	0.26667	K0.00Na0.37Ca0.63Al1.63Si2.37O8	52.2327	0	30.554	0	0	0	0	0	13.0196	4.16406	0.0296356	0
2000	1136	0.213997	0.517435	-2949.42	0.080797	0.262743	K0.00Na0.37Ca0.63Al1.63Si2.37O8	52.2754	0	30.5252	0	0	0	0	0	12.9859	4.18361	0.0299425	0
2000	1135	0.210891	0.509803	-2906.8	0.079633	0.258912	K0.00Na0.37Ca0.63Al1.63Si2.37O8	52.318	0	30.4964	0	0	0	0	0	12.9522	4.20313	0.0302507	0
2000	1134	0.20786	0.502355	-2865.19	0.078496	0.255173	K0.00Na0.37Ca0.63Al1.63Si2.37O8	52.3605	0	30.4677	0	0	0	0	0	12.9186	4.22262	0.0305603	0
2000	1133	0.204902	0.495084	-2824.58	0.077387	0.251524	K0.00Na0.37Ca0.63Al1.63Si2.37O8	52.403	0	30.4391	0	0	0	0	0	12.885	4.24208	0.0308714	0
2000	1132	0.202013	0.487986	-2784.93	0.076303	0.24796	K0.00Na0.37Ca0.62Al1.62Si2.38O8	52.4454	0	30.4104	0	0	0	0	0	12.8515	4.2615	0.0311838	0
2000	1131	0.199191	0.481053	-2746.2	0.075245	0.24448	K0.00Na0.38Ca0.62Al1.62Si2.38O8	52.4877	0	30.3819	0	0	0	0	0	12.8181	4.2809	0.0314977	0
2000	1130	0.196436	0.474282	-2708.37	0.074211	0.241081	K0.00Na0.38Ca0.62Al1.62Si2.38O8	52.5299	0	30.3533	0	0	0	0	0	12.7847	4.30027	0.0318129	0
2000	1129	0.193743	0.467667	-2671.41	0.073201	0.237759	K0.00Na0.38Ca0.62Al1.62Si2.38O8	52.5721	0	30.3248	0	0	0	0	0	12.7513	4.3196	0.0321296	0
2000	1128	0.191112	0.461202	-2635.29	0.072214	0.234514	K0.00Na0.38Ca0.62Al1.62Si2.38O8	52.6143	0	30.2964	0	0	0	0	0	12.718	4.3389	0.0324478	0
2000	1127	0.18854	0.454884	-2599.99	0.07125	0.231342	K0.00Na0.38Ca0.62Al1.62Si2.38O8	52.6563	0	30.268	0	0	0	0	0	12.6847	4.35817	0.0327673	0
2000	1126	0.186026	0.448708	-2565.48	0.070306	0.228241	K0.00Na0.38Ca0.61Al1.61Si2.39O8	52.6983	0	30.2396	0	0	0	0	0	12.6515	4.37741	0.0330883	0
2000	1125	0.183567	0.442669	-2531.73	0.069384	0.225209	K0.00Na0.39Ca0.61Al1.61Si2.39O8	52.7403	0	30.2113	0	0	0	0	0	12.6184	4.39662	0.0334108	0
2000	1124	0.181163	0.436762	-2498.72	0.068482	0.222243	K0.00Na0.39Ca0.61Al1.61Si2.39O8	52.7821	0	30.183	0	0	0	0	0	12.5853	4.4158	0.0337347	0
2000	1123	0.178811	0.430986	-2466.44	0.0676	0.219343	K0.00Na0.39Ca0.61Al1.61Si2.39O8	52.8239	0	30.1548	0	0	0	0	0	12.5523	4.43494	0.0340601	0
2000	1122	0.17651	0.425334	-2434.85	0.066736	0.216505	K0.00Na0.39Ca0.61Al1.61Si2.39O8	52.8657	0	30.1266	0	0	0	0	0	12.5193	4.45406	0.034387	0
2000	1121	0.174259	0.419804	-2403.94	0.065891	0.213728	K0.00Na0.39Ca0.61Al1.61Si2.39O8	52.9073	0	30.0985	0	0	0	0	0	12.4863	4.47314	0.0347153	0
2000	1120	0.172055	0.414391	-2373.68	0.065064	0.21101	K0.00Na0.39Ca0.60Al1.60Si2.40O8	52.9489	0	30.0704	0	0	0	0	0	12.4535	4.49218	0.0350451	0
2000	1119	0.169898	0.409093	-2344.07	0.064255	0.20835	K0.00Na0.40Ca0.60Al1.60Si2.40O8	52.9905	0	30.0423	0	0	0	0	0	12.4206	4.5112	0.0353764	0
2000	1118	0.167786	0.403906	-2315.07	0.063462	0.205745	K0.00Na0.40Ca0.60Al1.60Si2.40O8	53.0319	0	30.0143	0	0	0	0	0	12.3879	4.53018	0.0357092	0
2000	1117	0.165718	0.398827	-2286.68	0.062686	0.203195	K0.00Na0.40Ca0.60Al1.60Si2.40O8	53.0733	0	29.9864	0	0	0	0	0	12.3551	4.54913	0.0360435	0
2000	1116	0.163692	0.393853	-2258.87	0.061926	0.200697	K0.00Na0.40Ca0.60Al1.60Si2.40O8	53.1146	0	29.9585	0	0	0	0	0	12.3225	4.56805	0.0363792	0
2000	1115	0.161708	0.38898	-2231.62	0.061181	0.19825	K0.00Na0.40Ca0.60Al1.60Si2.40O8	53.1559	0	29.9306	0	0	0	0	0	12.2899	4.58693	0.0367165	0
2000	1114	0.159764	0.384206	-2204.93	0.060451	0.195852	K0.00Na0.40Ca0.59Al1.59Si2.41O8	53.1971	0	29.9028	0	0	0	0	0	12.2573	4.60578	0.0370554	0
2000	1113	0.157859	0.379529	-2178.78	0.059736	0.193503	K0.00Na0.41Ca0.59Al1.59Si2.41O8	53.2382	0	29.875	0	0	0	0	0	12.2248	4.6246	0.0373957	0
2000	1112	0.155992	0.374944	-2153.14	0.059035	0.191201	K0.00Na0.41Ca0.59Al1.59Si2.41O8	53.2792	0	29.8473	0	0	0	0	0	12.1924	4.64338	0.0377375	0
2000	1111	0.154162	0.370451	-2128.01	0.058348	0.188944	K0.00Na0.41Ca0.59Al1.59Si2.41O8	53.3202	0	29.8196	0	0	0	0	0	12.16	4.66213	0.0380809	0
2000	1110	0.152368	0.366045	-2103.38	0.057675	0.186732	K0.00Na0.41Ca0.59Al1.59Si2.41O8	53.3611	0	29.792	0	0	0	0	0	12.1276	4.68085	0.0384258	0
2000	1109	0.150609	0.361726	-2079.22	0.057014	0.184562	K0.00Na0.41Ca0.59Al1.59Si2.41O8	53.4019	0	29.7644	0	0	0	0	0	12.0954	4.69953	0.0387723	0
2000	1108	0.148884	0.35749	-2055.53	0.056366	0.182435	K0.00Na0.41Ca0.58Al1.58Si2.42O8	53.4426	0	29.7369	0	0	0	0	0	12.0631	4.71818	0.0391203	0
2000	1107	0.147192	0.353336	-2032.3	0.055731	0.180348	K0.00Na0.42Ca0.58Al1.58Si2.42O8	53.4833	0	29.7094	0	0	0	0	0	12.031	4.73679	0.0394698	0
2000	1106	0.145532	0.34926	-2009.5	0.055108	0.178302	K0.00Na0.42Ca0.58Al1.58Si2.42O8	53.5239	0	29.682	0	0	0	0	0	11.9989	4.75537	0.0398209	0
2000	1105	0.143903	0.345262	-1987.14	0.054496	0.176293	K0.00Na0.42Ca0.58Al1.58Si2.42O8	53.5645	0	29.6546	0	0	0	0	0	11.9668	4.77392	0.0401736	0
2000	1104	0.142305	0.341339	-1965.19	0.053896	0.174323	K0.00Na0.42Ca0.58Al1.58Si2.42O8	53.6049	0	29.6273	0	0	0	0	0	11.9348	4.79243	0.0405278	0
2000	1103	0.140736	0.337488	-1943.65	0.053307	0.172389	K0.00Na0.42Ca0.58Al1.58Si2.42O8	53.6453	0	29.6	0	0	0	0	0	11.9029	4.8109	0.0408836	0
2000	1102	0.139197	0.333709	-1922.51	0.052728	0.17049	K0.00Na0.42Ca0.57Al1.57Si2.43O8	53.6857	0	29.5727	0	0	0	0	0	11.871	4.82934	0.0412409	0
2000	1101	0.137685	0.329999	-1901.75	0.052161	0.168627	K0.00Na0.42Ca0.57Al1.57Si2.43O8	53.7259	0	29.5456	0	0	0	0	0	11.8392	4.84775	0.0415999	0
2000	1100	0.136201	0.326356	-1881.37	0.051603	0.166797	K0.00Na0.43Ca0.57Al1.57Si2.43O8	53.7661	0	29.5184	0	0	0	0	0	11.8074	4.86612	0.0419604	0
2000	1099	0.134744	0.32278	-1861.36	0.051056	0.165001	K0.00Na0.43Ca0.57Al1.57Si2.43O8	53.8062	0	29.4913	0	0	0	0	0	11.7757	4.88446	0.0423225	0
2000	1098	0.133313	0.319267	-1841.7	0.050518	0.163236	K0.00Na0.43Ca0.57Al1.57Si2.43O8	53.8462	0	29.4643	0	0	0	0	0	11.7441	4.90276	0.0426862	0
2000	1097	0.131907	0.315817	-1822.4	0.04999	0.161503	K0.00Na0.43Ca0.57Al1.57Si2.43O8	53.8862	0	29.4373	0	0	0	0	0	11.7125	4.92102	0.0430515	0
2000	1096	0.130526	0.312427	-1803.43	0.049471	0.1598	K0.00Na0.43Ca0.57Al1.57Si2.43O8	53.926	0	29.4104	0	0	0	0	0	11.6809	4.93925	0.0434184	0
2000	1095	0.12917	0.309098	-1784.8	0.048961	0.158128	K0.00Na0.43Ca0.56Al1.56Si2.44O8	53.9658	0	29.3835	0	0	0	0	0	11.6495	4.95745	0.0437868	0
2000	1094	0.127836	0.305826	-1766.49	0.04846	0.156484	K0.00Na0.44Ca0.56Al1.56Si2.44O8	54.0056	0	29.3566	0	0	0	0	0	11.6181	4.97561	0.0441569	0
2000	1093	0.126526	0.30261	-1748.49	0.047968	0.154869	K0.00Na0.44Ca0.56Al1.56Si2.44O8	54.0452	0	29.3298	0	0	0	0	0	11.5867	4.99373	0.0445287	0
2000	1092	0.125239	0.29945	-1730.81	0.047484	0.153281	K0.00Na0.44Ca0.56Al1.56Si2.44O8	54.0848	0	29.3031	0	0	0	0	0	11.5554	5.01182	0.044902	0
2000	1091	0.123973	0.296344	-1713.42	0.047008	0.151721	K0.00Na0.44Ca0.56Al1.56Si2.44O8	54.1243	0	29.2764	0	0	0	0	0	11.5242	5.02987	0.0452769	0
2000	1090	0.122728	0.29329	-1696.33	0.046541	0.150186	K0.00Na0.44Ca0.56Al1.56Si2.44O8	54.1637	0	29.2498	0	0	0	0	0	11.493	5.04788	0.0456535	0
2000	1089	0.121505	0.290287	-1679.52	0.046081	0.148678	K0.00Na0.44Ca0.55Al1.55Si2.45O8	54.203	0	29.2232	0	0	0	0	0	11.4619	5.06586	0.0460317	0
2000	1088	0.120301	0.287334	-1662.99	0.045628	0.147194	K0.00Na0.44Ca0.55Al1.55Si2.45O8	54.2423	0	29.1966	0	0	0	0	0	11.4308	5.0838	0.0464115	0
2000	1087	0.119118	0.284431	-1646.73	0.045183	0.145736	K0.00Na0.45Ca0.55Al1.55Si2.45O8	54.2815	0	29.1702	0	0	0	0	0	11.3998	5.10171	0.046793	0
2000	1086	0.117954	0.281575	-1630.75	0.044746	0.144301	K0.00Na0.45Ca0.55Al1.55Si2.45O8	54.3206	0	29.1437	0	0	0	0	0	11.3689	5.11958	0.0471761	0
2000	1085	0.116809	0.278765	-1615.02	0.044315	0.142889	K0.00Na0.45Ca0.55Al1.55Si2.45O8	54.3597	0	29.1173	0	0	0	0	0	11.338	5.13741	0.0475609	0
2000	1084	0.115682	0.276001	-1599.54	0.043892	0.1415	K0.00Na0.45Ca0.55Al1.55Si2.45O8	54.3986	0	29.091	0	0	0	0	0	11.3072	5.15521	0.0479473	0
2000	1083	0.114574	0.273282	-1584.32	0.043475	0.140134	K0.00Na0.45Ca0.54Al1.54Si2.46O8	54.4375	0	29.0647	0	0	0	0	0	11.2765	5.17297	0.0483354	0
2000	1082	0.113483	0.270606	-1569.33	0.043065	0.138789	K0.00Na0.45Ca0.54Al1.54Si2.46O8	54.4763	0	29.0385	0	0	0	0	0	11.2458	5.19069	0.0487251	0
2000	1081	0.11241	0.267972	-1554.59	0.042661	0.137466	K0.00Na0.46Ca0.54Al1.54Si2.46O8	54.5151	0	29.0123	0	0	0	0	0	11.2151	5.20838	0.0491165	0
2000	1080	0.111353	0.26538	-1540.07	0.042264	0.136164	K0.00Na0.46Ca0.54Al1.54Si2.46O8	54.5537	0	28.9862	0	0	0	0	0	11.1846	5.22603	0.0495095	0
2000	1079	0.110313	0.262829	-1525.78	0.041873	0.134882	K0.00Na0.46Ca0.54Al1.54Si2.46O8	54.5923	0	28.9601	0	0	0	0	0	11.154	5.24364	0.0499043	0
2000	1078	0.109289	0.260317	-1511.72	0.041488	0.13362	K0.00Na0.46Ca0.54Al1.54Si2.46O8	54.6308	0	28.9341	0	0	0	0	0	11.1236	5.26122	0.0503006	0
2000	1077	0.108281	0.257844	-1497.87	0.041109	0.132377	K0.00Na0.46Ca0.54Al1.54Si2.46O8	54.6692	0	28.9081	0	0	0	0	0	11.0932	5.27876	0.0506987	0
2000	1076	0.107288	0.255409	-1484.23	0.040735	0.131153	K0.00Na0.46Ca0.53Al1.53Si2.47O8	54.7075	0	28.8822	0	0	0	0	0	11.0629	5.29626	0.0510985	0
2000	1075	0.106311	0.253011	-1470.8	0.040368	0.129948	K0.00Na0.46Ca0.53Al1.53Si2.47O8	54.7458	0	28.8564	0	0	0	0	0	11.0326	5.31372	0.0514999	0
2000	1074	0.105348	0.250649	-1457.57	0.040005	0.128762	K0.00Na0.47Ca0.53Al1.53Si2.47O8	54.784	0	28.8306	0	0	0	0	0	11.0024	5.33115	0.051903	0
2000	1073	0.104415	0.248359	-1444.75	0.039654	0.127611	K0.00Na0.47Ca0.53Al1.53Si2.47O8	54.8221	0	28.8048	0	0	0	0	0	10.9723	5.34854	0.0523077	0
2000	1072	0.103512	0.246141	-1432.34	0.039315	0.126498	K0.00Na0.47Ca0.53Al1.53Si2.47O8	54.8601	0	28.7791	0	0	0	0	0	10.9422	5.36589	0.0527135	0
2000	1071	0.102591	0.243882	-1419.69	0.038968	0.125362	K0.00Na0.47Ca0.53Al1.53Si2.47O8	54.8981	0	28.7534	0	0	0	0	0	10.9122	5.38321	0.0531211	0
2000	1070	0.101683	0.241656	-1407.22	0.038627	0.124244	K0.00Na0.47Ca0.53Al1.53Si2.47O8	54.936	0	28.7278	0	0	0	0	0	10.8822	5.40049	0.0535303	0
2000	1069	0.100787	0.239459	-1394.91	0.038289	0.123139	K0.00Na0.47Ca0.52Al1.52Si2.48O8	54.9738	0	28.7023	0	0	0	0	0	10.8523	5.41774	0.0539413	0
2000	1068	0.099904	0.237294	-1382.78	0.037957	0.122051	K0.00Na0.47Ca0.52Al1.52Si2.48O8	55.0115	0	28.6768	0	0	0	0	0	10.8224	5.43494	0.0543539	0
2000	1067	0.099034	0.23516	-1370.82	0.03763	0.120979	K0.00Na0.48Ca0.52Al1.52Si2.48O8	55.0491	0	28.6513	0	0	0	0	0	10.7927	5.45211	0.0547683	0
2000	1066	0.098176	0.233057	-1359.04	0.037307	0.119922	K0.00Na0.48Ca0.52Al1.52Si2.48O8	55.0867	0	28.6259	0	0	0	0	0	10.7629	5.46925	0.0551843	0
2000	1065	0.097331	0.230985	-1347.42	0.036989	0.11888	K0.00Na0.48Ca0.52Al1.52Si2.48O8	55.1242	0	28.6006	0	0	0	0	0	10.7333	5.48634	0.0556021	0
2000	1064	0.096498	0.228942	-1335.97	0.036675	0.117853	K0.00Na0.48Ca0.52Al1.52Si2.48O8	55.1616	0	28.5753	0	0	0	0	0	10.7037	5.5034	0.0560215	0
2000	1063	0.095676	0.226927	-1324.68	0.036366	0.116841	K0.00Na0.48Ca0.51Al1.51Si2.49O8	55.1989	0	28.55	0	0	0	0	0	10.6742	5.52042	0.0564427	0
2000	1062	0.094866	0.224941	-1313.55	0.036061	0.115843	K0.00Na0.48Ca0.51Al1.51Si2.49O8	55.2362	0	28.5249	0	0	0	0	0	10.6447	5.53741	0.0568656	0
2000	1061	0.094068	0.222983	-1302.58	0.03576	0.114859	K0.00Na0.48Ca0.51Al1.51Si2.49O8	55.2734	0	28.4997	0	0	0	0	0	10.6153	5.55436	0.0572902	0
2000	1060	0.09328	0.221052	-1291.75	0.035464	0.113888	K0.00Na0.49Ca0.51Al1.51Si2.49O8	55.3105	0	28.4746	0	0	0	0	0	10.5859	5.57127	0.0577165	0
2000	1059	0.092503	0.219148	-1281.08	0.035171	0.112931	K0.00Na0.49Ca0.51Al1.51Si2.49O8	55.3475	0	28.4496	0	0	0	0	0	10.5566	5.58814	0.0581446	0
2000	1058	0.091737	0.21727	-1270.55	0.034883	0.111987	K0.00Na0.49Ca0.51Al1.51Si2.49O8	55.3844	0	28.4246	0	0	0	0	0	10.5274	5.60498	0.0585743	0
2000	1057	0.090982	0.215418	-1260.17	0.034598	0.111056	K0.00Na0.49Ca0.51Al1.51Si2.49O8	55.4213	0	28.3997	0	0	0	0	0	10.4982	5.62178	0.0590059	0
2000	1056	0.090236	0.213591	-1249.92	0.034318	0.110137	K0.00Na0.49Ca0.50Al1.50Si2.50O8	55.4581	0	28.3748	0	0	0	0	0	10.4691	5.63854	0.0594391	0
2000	1055	0.089501	0.211788	-1239.82	0.034041	0.109231	K0.00Na0.49Ca0.50Al1.50Si2.50O8	55.4948	0	28.35	0	0	0	0	0	10.4401	5.65526	0.0598741	0
2000	1054	0.088775	0.21001	-1229.85	0.033768	0.108337	K0.00Na0.49Ca0.50Al1.50Si2.50O8	55.5314	0	28.3252	0	0	0	0	0	10.4111	5.67195	0.0603109	0
2000	1053	0.08806	0.208255	-1220.01	0.033498	0.107455	K0.00Na0.50Ca0.50Al1.50Si2.50O8	55.568	0	28.3005	0	0	0	0	0	10.3822	5.68861	0.0607494	0
2000	1052	0.087353	0.206523	-1210.3	0.033232	0.106584	K0.00Na0.50Ca0.50Al1.50Si2.50O8	55.6044	0	28.2758	0	0	0	0	0	10.3533	5.70522	0.0611896	0
2000	1051	0.086656	0.204815	-1200.72	0.032969	0.105725	K0.00Na0.50Ca0.50Al1.50Si2.50O8	55.6409	0	28.2512	0	0	0	0	0	10.3245	5.7218	0.0616316	0
2000	1050	0.085968	0.203129	-1191.26	0.03271	0.104878	K0.00Na0.50Ca0.50Al1.50Si2.50O8	55.6772	0	28.2266	0	0	0	0	0	10.2958	5.73834	0.0620754	0
2000	1049	0.085289	0.201465	-1181.93	0.032454	0.104041	K0.00Na0.50Ca0.49Al1.49Si2.51O8	55.7134	0	28.2021	0	0	0	0	0	10.2671	5.75485	0.062521	0
2000	1048	0.084619	0.199822	-1172.72	0.032202	0.103215	K0.00Na0.50Ca0.49Al1.49Si2.51O8	55.7496	0	28.1777	0	0	0	0	0	10.2385	5.77132	0.0629683	0
2000	1047	0.083957	0.198201	-1163.62	0.031952	0.1024	K0.00Na0.50Ca0.49Al1.49Si2.51O8	55.7857	0	28.1533	0	0	0	0	0	10.2099	5.78775	0.0634173	0
2000	1046	0.083304	0.1966	-1154.65	0.031706	0.101595	K0.00Na0.51Ca0.49Al1.49Si2.51O8	55.8217	0	28.1289	0	0	0	0	0	10.1814	5.80414	0.0638682	0
2000	1045	0.08266	0.19502	-1145.78	0.031463	0.100801	K0.00Na0.51Ca0.49Al1.49Si2.51O8	55.8576	0	28.1046	0	0	0	0	0	10.1529	5.8205	0.0643208	0
2000	1044	0.082023	0.19346	-1137.03	0.031224	0.100016	K0.00Na0.51Ca0.49Al1.49Si2.51O8	55.8935	0	28.0803	0	0	0	0	0	10.1246	5.83683	0.0647752	0
2000	1043	0.081394	0.19192	-1128.39	0.030987	0.099242	K0.00Na0.51Ca0.49Al1.49Si2.51O8	55.9293	0	28.0561	0	0	0	0	0	10.0962	5.85312	0.0652314	0
2000	1042	0.080774	0.190399	-1119.86	0.030753	0.098477	K0.00Na0.51Ca0.48Al1.48Si2.52O8	55.965	0	28.0319	0	0	0	0	0	10.068	5.86937	0.0656894	0
2000	1041	0.080161	0.188897	-1111.43	0.030522	0.097722	K0.00Na0.51Ca0.48Al1.48Si2.52O8	56.0007	0	28.0078	0	0	0	0	0	10.0398	5.88558	0.0661492	0
2000	1040	0.079555	0.187413	-1103.11	0.030293	0.096976	K0.00Na0.51Ca0.48Al1.48Si2.52O8	56.0362	0	27.9838	0	0	0	0	0	10.0116	5.90176	0.0666108	0
2000	1039	0.078957	0.185949	-1094.89	0.030068	0.096239	K0.00Na0.52Ca0.48Al1.48Si2.52O8	56.0717	0	27.9598	0	0	0	0	0	9.98353	5.91791	0.0670742	0
2000	1038	0.078367	0.184502	-1086.77	0.029845	0.095512	K0.00Na0.52Ca0.48Al1.48Si2.52O8	56.1071	0	27.9358	0	0	0	0	0	9.9555	5.93402	0.0675394	0
2000	1037	0.077784	0.183073	-1078.75	0.029626	0.094793	K0.00Na0.52Ca0.48Al1.48Si2.52O8	56.1425	0	27.9119	0	0	0	0	0	9.92753	5.95009	0.0680064	0
2000	1036	0.077207	0.181661	-1070.83	0.029408	0.094083	K0.00Na0.52Ca0.48Al1.48Si2.52O8	56.1777	0	27.888	0	0	0	0	0	9.89961	5.96613	0.0684752	0
2000	1035	0.076638	0.180267	-1063.01	0.029194	0.093382	K0.00Na0.52Ca0.48Al1.48Si2.52O8	56.2129	0	27.8642	0	0	0	0	0	9.87176	5.98213	0.0689459	0
2000	1034	0.076076	0.178889	-1055.27	0.028982	0.092689	K0.00Na0.52Ca0.47Al1.47Si2.53O8	56.2481	0	27.8405	0	0	0	0	0	9.84396	5.9981	0.0694183	0
2000	1033	0.07552	0.177529	-1047.64	0.028772	0.092005	K0.00Na0.52Ca0.47Al1.47Si2.53O8	56.2831	0	27.8168	0	0	0	0	0	9.81622	6.01404	0.0698926	0
2000	1032	0.074972	0.176184	-1040.09	0.028565	0.091329	K0.00Na0.53Ca0.47Al1.47Si2.53O8	56.3181	0	27.7931	0	0	0	0	0	9.78853	6.02993	0.0703687	0
2000	1031	0.074429	0.174856	-1032.64	0.028361	0.090661	K0.00Na0.53Ca0.47Al1.47Si2.53O8	56.353	0	27.7695	0	0	0	0	0	9.7609	6.0458	0.0708467	0
2000	1030	0.073894	0.173543	-1025.27	0.028159	0.09	K0.00Na0.53Ca0.47Al1.47Si2.53O8	56.3878	0	27.7459	0	0	0	0	0	9.73333	6.06163	0.0713265	0
2000	1029	0.073364	0.172247	-1017.99	0.027959	0.089348	K0.00Na0.53Ca0.47Al1.47Si2.53O8	56.4226	0	27.7224	0	0	0	0	0	9.70582	6.07742	0.0718082	0
2000	1028	0.072841	0.170965	-1010.79	0.027762	0.088704	K0.00Na0.53Ca0.47Al1.47Si2.53O8	56.4573	0	27.6989	0	0	0	0	0	9.67836	6.09319	0.0722917	0
2000	1027	0.072324	0.169699	-1003.69	0.027567	0.088067	K0.00Na0.53Ca0.46Al1.46Si2.54O8	56.4919	0	27.6755	0	0	0	0	0	9.65095	6.10891	0.072777	0
2000	1026	0.071813	0.168448	-996.66	0.027374	0.087437	K0.00Na0.53Ca0.46Al1.46Si2.54O8	56.5264	0	27.6521	0	0	0	0	0	9.6236	6.12461	0.0732642	0
2000	1025	0.071308	0.167211	-989.717	0.027183	0.086815	K0.00Na0.53Ca0.46Al1.46Si2.54O8	56.5609	0	27.6288	0	0	0	0	0	9.59631	6.14027	0.0737533	0
2000	1024	0.070809	0.165989	-982.855	0.026995	0.086201	K0.00Na0.54Ca0.46Al1.46Si2.54O8	56.5953	0	27.6055	0	0	0	0	0	9.56907	6.15589	0.0742443	0
2000	1023	0.070317	0.164782	-976.084	0.026809	0.086176	K0.00Na0.54Ca0.46Al1.46Si2.54O8	56.6296	0	27.5822	0	0	0	0	0	9.54189	6.17149	0.0747371	0
2000	1022	0.069832	0.163594	-969.416	0.026626	0.085576	K0.00Na0.54Ca0.46Al1.46Si2.54O8	56.6639	0	27.5591	0	0	0	0	0	9.51475	6.18705	0.0752319	0
2000	1021	0.069352	0.16242	-962.826	0.026445	0.084983	K0.00Na0.54Ca0.46Al1.46Si2.54O8	56.6981	0	27.5359	0	0	0	0	0	9.48767	6.20258	0.0757285	0
2000	1020	0.068879	0.161259	-956.312	0.026267	0.084398	K0.00Na0.54Ca0.45Al1.45Si2.55O8	56.7323	0	27.5128	0	0	0	0	0	9.46064	6.21808	0.0762271	0
2000	1019	0.06841	0.160112	-949.874	0.02609	0.083819	K0.00Na0.54Ca0.45Al1.45Si2.55O8	56.7663	0	27.4897	0	0	0	0	0	9.43365	6.23355	0.0767276	0
2000	1018	0.067948	0.158978	-943.511	0.025915	0.083247	K0.00Na0.54Ca0.45Al1.45Si2.55O8	56.8004	0	27.4667	0	0	0	0	0	9.40672	6.24899	0.07723	0
2000	1017	0.06749	0.157857	-937.221	0.025743	0.082681	K0.00Na0.54Ca0.45Al1.45Si2.55O8	56.8343	0	27.4437	0	0	0	0	0	9.37984	6.2644	0.0777343	0
2000	1016	0.067038	0.156749	-931.004	0.025572	0.082122	K0.00Na0.55Ca0.45Al1.45Si2.55O8	56.8682	0	27.4208	0	0	0	0	0	9.35301	6.27978	0.0782406	0
2000	1015	0.066591	0.155654	-924.858	0.025403	0.08157	K0.00Na0.55Ca0.45Al1.45Si2.55O8	56.902	0	27.3979	0	0	0	0	0	9.32622	6.29513	0.0787489	0
2000	1014	0.066149	0.154571	-918.784	0.025236	0.081024	K0.00Na0.55Ca0.45Al1.45Si2.55O8	56.9358	0	27.375	0	0	0	0	0	9.29948	6.31045	0.0792591	0
2000	1013	0.065713	0.153501	-912.779	0.025072	0.080484	K0.00Na0.55Ca0.45Al1.45Si2.55O8	56.9695	0	27.3522	0	0	0	0	0	9.2728	6.32574	0.0797713	0
2000	1012	0.065281	0.152444	-906.844	0.024909	0.07995	K0.00Na0.55Ca0.44Al1.44Si2.56O8	57.0031	0	27.3294	0	0	0	0	0	9.24616	6.341	0.0802854	0
2000	1011	0.064855	0.151398	-900.977	0.024748	0.079423	K0.00Na0.55Ca0.44Al1.44Si2.56O8	57.0367	0	27.3067	0	0	0	0	0	9.21956	6.35623	0.0808016	0
2000	1010	0.064433	0.150365	-895.177	0.024588	0.078902	K0.00Na0.55Ca0.44Al1.44Si2.56O8	57.0702	0	27.284	0	0	0	0	0	9.19301	6.37143	0.0813197	0
2000	1009	0.064016	0.149344	-889.445	0.024431	0.078386	K0.00Na0.56Ca0.44Al1.44Si2.56O8	57.1037	0	27.2613	0	0	0	0	0	9.16651	6.38661	0.0818398	0
2000	1008	0.063604	0.148334	-883.779	0.024275	0.077877	K0.00Na0.56Ca0.44Al1.44Si2.56O8	57.1371	0	27.2387	0	0	0	0	0	9.14006	6.40175	0.082362	0
2000	1007	0.063197	0.147336	-878.178	0.024122	0.077373	K0.00Na0.56Ca0.44Al1.44Si2.56O8	57.1705	0	27.2161	0	0	0	0	0	9.11365	6.41687	0.0828861	0
2000	1006	0.062794	0.14635	-872.642	0.02397	0.076876	K0.00Na0.56Ca0.44Al1.44Si2.56O8	57.2038	0	27.1936	0	0	0	0	0	9.08728	6.43196	0.0834123	0
2000	1005	0.062396	0.145375	-867.17	0.023819	0.076384	K0.00Na0.56Ca0.44Al1.44Si2.56O8	57.237	0	27.1711	0	0	0	0	0	9.06096	6.44702	0.0839405	0
2000	1004	0.062003	0.144411	-861.761	0.023671	0.075898	K0.00Na0.56Ca0.43Al1.43Si2.57O8	57.2702	0	27.1486	0	0	0	0	0	9.03468	6.46206	0.0844708	0
2000	1003	0.061614	0.143458	-856.416	0.023524	0.075417	K0.00Na0.56Ca0.43Al1.43Si2.57O8	57.3033	0	27.1262	0	0	0	0	0	9.00845	6.47707	0.0850031	0
2000	1002	0.06123	0.142517	-851.134	0.023379	0.074942	K0.00Na0.56Ca0.43Al1.43Si2.57O8	57.3364	0	27.1038	0	0	0	0	0	8.98226	6.49205	0.0855375	0
2000	1001	0.060851	0.141587	-845.914	0.023235	0.074473	K0.00Na0.57Ca0.43Al1.43Si2.57O8	57.3694	0	27.0814	0	0	0	0	0	8.95611	6.50701	0.0860739	0
2000	1000	0.060476	0.140667	-840.757	0.023094	0.07401	K0.00Na0.57Ca0.43Al1.43Si2.57O8	57.4023	0	27.0591	0	0	0	0	0	8.93	6.52194	0.0866125	0
[truncated: 2,621 more rows]
[truncated: 1 more columns]
