# Supplementary material for: A 5-km-thick reservoir with > 380,000 km3 of magma within the ancient Earth's crust
Source: Sci Rep. 2022 Sep 19;12:15651. doi: 10.1038/s41598-022-19915-w (PMC9485162; doi:10.1038/s41598-022-19915-w)
Supplement: Supplementary file 22 — Supplementary Information 22. [file 41598_2022_19915_MOESM22_ESM.xlsx]

## Sheet: Foaie1
SupplTable S5: Summary of PM modelling results
Degree of of mixing	T liquidus	Liquidus phase	Succession of assemblages by fractional crystallization	Mg# in Opx	An in Plag	Correspondent	Zone
O0R100	1145	cpx-pig-pl		81.18	66	Cumulates below PM	Top of zone C
O10R90	1153	opx-pl	opx-pl --> opx-pl-cpx	81.62	68	Cumulates below PM	Start of zone A'
O20R80	1163	opx	opx--> opx-pl-cpx	82.25	69	PM	A'
O30R70	1173	opx	opx--> opx-pl-cpx	83.33	70	PM	A'
O40R60	1182	opx	opx --> opx-pl-cpx --> opx-pl-cpx±-pig*	84.408	71	PM	A'
O50R50	1191	opx	opx --> opx-pl --> opx-pl-cpx	85.026	72	Cumulates above PM	A'
O60R40	1199	opx	opx --> opx-pl --> opx-pl-cpx	86.021	73	Cumulates above PM	A'
O70R30	1208	opx	opx --> opx-pl --> opx-pl-cpx --> opx-pl-cpx±-pig	86.631	75	Cumulates above PM	A''
*Corresponds to the PM Mg# and An (after adjusting for trapped liquid shift effect)
*Mixing stopped at maximum mixing O70R30, after which the mix followed fractional crystallization
